# Supplementary material for: Molecular portraits of colorectal cancer morphological regions
Source: eLife. 2023 Nov 13;12:RP86655. doi: 10.7554/eLife.86655 (PMC10642970; doi:10.7554/eLife.86655)
Supplement: Supplementary file 1. [file elife-86655-supp1.xlsx]

## Sheet: SF1
Variable	Overall (N=111)
gender
F	58 (52.3%)
M	53 (47.7%)
pT
pT1	1 (0.9%)
pT2	6 (5.4%)
pT3	96 (86.5%)
pT4	8 (7.2%)
pN
pN0	61 (55.0%)
pN1	32 (28.8%)
pN2	18 (16.2%)
M
M0	91 (82.0%)
M1	20 (18.0%)
grade
1	11 (9.9%)
2	52 (46.8%)
3	36 (32.4%)
Missing	12 (10.8%)
stage
II	59 (53.2%)
III	32 (28.8%)
IV	20 (18.0%)
site
left	32 (28.8%)
right	54 (48.6%)
transversum	23 (20.7%)
Missing	2 (1.8%)
