# Supplementary material for: Molecular portraits of colorectal cancer morphological regions
Source: eLife. 2023 Nov 13;12:RP86655. doi: 10.7554/eLife.86655 (PMC10642970; doi:10.7554/eLife.86655)
Supplement: Supplementary file 2. [file elife-86655-supp2.xlsx]

## Sheet: SF2
Variable	CT (N=52)	DE (N=15)	MU (N=21)	PP (N=12)	SE (N=40)	TB (N=9)	NR (N=17)	ST (N=8)	Overall (N=174)
Sex
F	26 (50.0%)	8 (53.3%)	12 (57.1%)	6 (50.0%)	20 (50.0%)	8 (88.9%)	11 (64.7%)	6 (75.0%)	97 (55.7%)
M	26 (50.0%)	7 (46.7%)	9 (42.9%)	6 (50.0%)	20 (50.0%)	1 (11.1%)	6 (35.3%)	2 (25.0%)	77 (44.3%)
pT stage
pT1	1 (1.9%)	0 (0%)	0 (0%)	0 (0%)	0 (0%)	0 (0%)	0 (0%)	0 (0%)	1 (0.6%)
pT2	2 (3.8%)	1 (6.7%)	0 (0%)	1 (8.3%)	2 (5.0%)	1 (11.1%)	0 (0%)	0 (0%)	7 (4.0%)
pT3	45 (86.5%)	13 (86.7%)	18 (85.7%)	11 (91.7%)	37 (92.5%)	7 (77.8%)	16 (94.1%)	8 (100%)	155 (89.1%)
pT4	4 (7.7%)	1 (6.7%)	3 (14.3%)	0 (0%)	1 (2.5%)	1 (11.1%)	1 (5.9%)	0 (0%)	11 (6.3%)
pN stage
pN0	30 (57.7%)	10 (66.7%)	12 (57.1%)	6 (50.0%)	25 (62.5%)	4 (44.4%)	10 (58.8%)	5 (62.5%)	102 (58.6%)
pN1	18 (34.6%)	2 (13.3%)	6 (28.6%)	3 (25.0%)	9 (22.5%)	2 (22.2%)	5 (29.4%)	2 (25.0%)	47 (27.0%)
pN2	4 (7.7%)	3 (20.0%)	3 (14.3%)	3 (25.0%)	6 (15.0%)	3 (33.3%)	2 (11.8%)	1 (12.5%)	25 (14.4%)
M stage
M0	43 (82.7%)	13 (86.7%)	18 (85.7%)	10 (83.3%)	33 (82.5%)	7 (77.8%)	13 (76.5%)	6 (75.0%)	143 (82.2%)
M1	9 (17.3%)	2 (13.3%)	3 (14.3%)	2 (16.7%)	7 (17.5%)	2 (22.2%)	4 (23.5%)	2 (25.0%)	31 (17.8%)
Grade
1	1 (1.9%)	1 (6.7%)	3 (14.3%)	1 (8.3%)	9 (22.5%)	0 (0%)	2 (11.8%)	1 (12.5%)	18 (10.3%)
2	25 (48.1%)	4 (26.7%)	6 (28.6%)	6 (50.0%)	19 (47.5%)	2 (22.2%)	5 (29.4%)	2 (25.0%)	69 (39.7%)
3	18 (34.6%)	3 (20.0%)	10 (47.6%)	4 (33.3%)	6 (15.0%)	6 (66.7%)	10 (58.8%)	5 (62.5%)	62 (35.6%)
Missing	8 (15.4%)	7 (46.7%)	2 (9.5%)	1 (8.3%)	6 (15.0%)	1 (11.1%)	0 (0%)	0 (0%)	25 (14.4%)
Stage
II	29 (55.8%)	10 (66.7%)	12 (57.1%)	6 (50.0%)	23 (57.5%)	4 (44.4%)	9 (52.9%)	4 (50.0%)	97 (55.7%)
III	14 (26.9%)	3 (20.0%)	6 (28.6%)	4 (33.3%)	10 (25.0%)	3 (33.3%)	4 (23.5%)	2 (25.0%)	46 (26.4%)
IV	9 (17.3%)	2 (13.3%)	3 (14.3%)	2 (16.7%)	7 (17.5%)	2 (22.2%)	4 (23.5%)	2 (25.0%)	31 (17.8%)
Tumor site
left	18 (34.6%)	3 (20.0%)	5 (23.8%)	1 (8.3%)	14 (35.0%)	1 (11.1%)	3 (17.6%)	1 (12.5%)	46 (26.4%)
right	21 (40.4%)	9 (60.0%)	14 (66.7%)	8 (66.7%)	17 (42.5%)	6 (66.7%)	12 (70.6%)	6 (75.0%)	93 (53.4%)
transversum	12 (23.1%)	2 (13.3%)	2 (9.5%)	2 (16.7%)	8 (20.0%)	2 (22.2%)	2 (11.8%)	1 (12.5%)	31 (17.8%)
Missing	1 (1.9%)	1 (6.7%)	0 (0%)	1 (8.3%)	1 (2.5%)	0 (0%)	0 (0%)	0 (0%)	4 (2.3%)
