# Supplementary material for: Molecular portraits of colorectal cancer morphological regions
Source: eLife. 2023 Nov 13;12:RP86655. doi: 10.7554/eLife.86655 (PMC10642970; doi:10.7554/eLife.86655)
Supplement: Supplementary file 3. [file elife-86655-supp3.xlsx]

## Sheet: Contents
These tables contain signatures collected from various articles. The list of sources is given below:
Signature	Source
colon_crypt_normal_basal-UP-original.txt	https://doi.org/10.1073/pnas.0707210104
colon_crypt_normal_top-UP-original.txt	https://doi.org/10.1073/pnas.0707210104
colon_tumor_stroma-DN-original.tab	https://doi.org/10.1155/2019/8752862
colon_tumor_stroma-UP-original.tab	https://doi.org/10.1155/2019/8752862
colon_tumor_stroma-high_stroma_content-UP-original.tab	https://doi.org/10.1155/2019/8752862
colon_tumor_stroma-low_stroma_content-DN-original.tab	https://doi.org/10.1155/2019/8752862
colon_fibroblast_tgfb-UP-original.tab	https://doi.org/10.1038/ng.3225
colon_msi_UP.tab	https://doi.org/10.1155/2019/6763596
colon_msi_DN.tab	https://doi.org/10.1155/2019/6763596
crc_i{2|3}_{UP|DN}.tab	https://doi.org/10.1038/s41588-022-01100-4
dunne-stroma_up	https://doi.org/10.1038/ncomms15657
isella-caf_up	https://doi.org/10.1038/ncomms15107
isella-endothelial_up	https://doi.org/10.1038/ncomms15107
isella-leucocyte_up	https://doi.org/10.1038/ncomms15107
caf-s1	https://doi.org/10.1186/s13059-022-02677-z
caf-s4	https://doi.org/10.1186/s13059-022-02677-z
caf-normal	https://doi.org/10.1186/s13059-022-02677-z
isc_crypt_bottom	https://doi.org/10.1016/j.stem.2011.02.020
differentiated_crypt_top	https://doi.org/10.1016/j.stem.2011.02.020
intest_epith_diff_up	https://doi.org/10.1016/j.stem.2011.02.020
CAF-Kieffer - all signatures in the worksheet	https://doi.org/10.1158/2159-8290.CD-19-1384

## Sheet: other signatures
colon_crypt_normal_basal_up	colon_crypt_normal_top_up	colon_fibroblast_tgfb_up	colon_msi_dn	colon_msi_up	colon_tumor_stroma_dn	colon_tumor_stroma_up	colon_tumor_stroma-high_stroma_content_up	colon_tumor_stroma-low_stroma_content_dn	crc_i2_dn	crc_i2_up	crc_i3_dn	crc_i3_up	dunne-stroma_up	intest_epith_diff_up	isella-caf_up	isella-endothelial_up	isella-leucocyte_up	caf-s1	caf-s4	caf-normal	isc_crypt_bottom	differentiated_crypt_top
THEG5	SLC17A4	FLT1	TNNT1	GNG4	MYOT	CTHRC1	C6orf15	COQ9	GBA2	CXCL14	AQP8	AL445524.1	ABCA9	APC	INHBA	PECAM1	SRGN	CXCL14	RGS5	GPM6B	DCLK1	PLB1
FARSB	OCLN	FLT1	VNN2	KRT23	C7	NFE2L3	PPBP	LOC401052	IL18	LY6G6F-LY6G6D	SLC26A2	TNFRSF10B	ABI3BP	ATOH1	PTN	KDR	HIST1H3G	CFD	NDUFA4L2	CLU	PCDH8	SAA2
TRAP1	DPP3	COL10A1	TRIM7	ACSL6	GNG7	SULF1	SEMA3G	PPARGC1A	FA2H	EREG	PCSK1N	DNAJC10	C7	BLIMP1	LOC100132116	PLVAP	LCP2	DCN	CSRP2	NRXN1	LGR5	CEACAM20
CDK4	TSPAN3	IGFBP3	TNFSF9	TNNC2	ARHGEF37	SOX9	BICD1	NDUFB8	TP53I3	TIMP3	MS4A12	IGHG4	CASQ2	BMPR1A	MEG3	CDH5	MIAT	LUM	NOTCH3	S100B	CYP2E1	GDPD2
CDK6	CTDSP2	NOX4	AGR2	SHROOM2	ASPA	ENC1	ARSK	BLVRB	BAIAP2L2	KRT23	FABP1	TSTA3	CILP	CBFA2T2	CCL2	EMCN	IRF4	MMP2	GJA4	PLP1	LIMCH1	CUBN
SPRY1	SGK2	MEX3B	RPL22L1	EPDR1	BCL2	CCND1	KRT80	CA14	NPTN	RUBCNL	TLE2	PFKP	CILP2	CDH1	LOXL2	ARHGEF15	HIST1H2BM	FBLN1	MCAM	CD9	ARL4C	NLRP9
CDKN3	ARL4A	GAS1		ARID3A	SLC6A16	VCAN	C4orf32	PAN2	PPP2CB	PLTP	CA4	RASL11A	FABP4	CDX1	GPC6	VWF	ARHGAP9	F3	TINAGL1	CRYAB	FAM49A	AI481121
SCML2	CDH18	INHBA		KHDRBS3	KIAA2022	PCDH17	ENPEP	CLCN2	STXBP5	TNNC2	UGT2A3	LIPG	HSPB6	CDX2	BNC2	DARC	HIST1H3B	SFRP2	COL4A1	CDH19	BEX4	SYNPO
MYL9	DHRS9	VEGFA		GGT7	RFX2	SEMA5A	BHLHE40	MST1	LAMA3	GGH	CEACAM7	RAB15	IGF1	CTNNB1	PDPN	CD93	HAVCR2	POSTN	CD36	FXYD1	ASCL2	SLC5A12
RACK1	LHFPL2	CDKN2B		SHROOM4	SRSF5	BCL6B	GPR84	OMA1	TRIP11	FN1	SLC39A5	CTNNBIP1	LONRF2	DLL1	RAB31	CD34	MYO1G	PDGFRA	PRSS23	SEMA3B	FSTL1	SLC5A4B
PEMT	GPA33	FBXO32		MLH1	PDK4	CLDN1	SULF1	TMEM116	CCNG2	TDGF1	MOGAT3	MUC17	MGP	DLL4	GUCY1B3	SCARF1	RGS1	C3	BCAM	ALDH1A1	SORCS2	BST1
WFDC2	CDKN1A	CALB2		NKD1	GATS	PROX1	FNDC3B	MIR600HG	HIPK1	ARID3A	ZBTB10	ATL3	MYOM1	ELF3	EFEMP1	GIMAP4	CCR7	VCAN	COL18A1	SCN7A	PSRC1	SLC47A1
CAP2	IRF9	CTGF		TFCP2L1	PCF11	PTBP3	BCL6B	CDH12	PPP1R12B	PTPRO	CEBPA	ADAM9	PTGIS	EPHB3	TGFB3	CALCRL	LOC100302650	IGFBP5	ANGPT2	PRNP	TUBB2B	SLC23A1
SYNCRIP	TESK2	VEGFA		VAV3	FXYD1	NUAK1	NCOA7	FHIT	UGDH	CYP2W1	ID1	SEZ6L2	SFRP1	FGF7	ADAM12	ECSCR	TAGAP	ADAMDEC1	ACTA2	MPZ	RASSF5	EGLN3
NOP56	PPIE	VEGFA		RUBCNL	CBX7	KDELR3	CHPF	SLC22A7	NUMB	TSPAN6	CKB	LPIN1	SFRP2	FGFR3	C1R	FCN3	FYB	SERPINF1	PDGFRB	L1CAM	SCN2B	VWA1
OLFM4	SEC23A	KANK4		ASCL2	METTL7A	SLC16A3	TWIST1	POLD3	FLII	FGGY	SATB2	ATP1B1	SLIT3	FOXA1	SGCE	FLT4	GNLY	APOD	ADIRF	MAL	SLC14A1	ASAH2
CENPA	IVNS1ABP	NET1		AXIN2	FGF13	COL5A1	ALPK2	AKAP7	PDLIM5	DPEP1	VAV3	PPP6R1	SYNPO2	FOXA2	GLT8D2	TAL1	CXCR6	IGFBP3	CD248	GFRA3	PTPRO	RDH16
PAICS	SPINT2	HEY1		PLAGL2	PELI2	MLXIPL	FZD2	MAP2K6	ZNF24	AXIN2	SEMA5A	DEPP1	TGFB3	FZD5	COL12A1	CXorf36	CD3G	CTSK	ESAM	ANGPTL7	NAV1	GDA
ST6GALNAC2	GIPC1	SERPINE1		PRR15	C16orf89	KIAA1217	TNFRSF11B	CEP95	ACADS	PRSS23	CFTR	WARS	WT1	GADD45GIP1	HGF	ERG	CD53	CTHRC1	COX4I2	MATN2	PVT1	SLC6A19
CENPE	SMPDL3A	ESM1			CCDC7	GZMB	LEF1	XK	ARSA	PLIN2	C10orf99	S100A13	ZBTB16	GATA6	DPT	TIE1	RCSD1	CXCL1	EPAS1	SPP1	KIF26B	SLC5A11
CENPF	TRIM31	NET1			EFCAB1	DCBLD1	FAM167A	NEIL1	ATP8A1	PLCB4	HNF4A	C9orf3	CXCL1	GATA4	CPXM1	SH2D3C	1-Sep	RARRES2	CCDC3	LGI4	SLC1A2	MAFB
LEFTY1	PRSS23	NOX4			ANKRD13A	CKAP4	PECAM1	GPD1L	COPG1	RNF43	CDX2	DPYSL2	CXCL5	GFI1	SFRP2	CSF2RB	TYROBP	C1S	CPE	PMP22	C13ORF15	SLC34A2
TENT4A	KATNA1	TIMP3			C1QTNF9	PLAUR	VPS37C	ATP5L	TLN2	PFDN4	PM20D2	MMP7	CXCL8	HES1	THY1	ROBO4	CCL22	LSP1	MYH11	ERBB3	ASRGL1	SLC13A2
UBE2C	CIT	SYNE1			TMOD1	SEMA3G	NOS3	GKAP1	SMAD4	ASCL2	SLC26A3	CDKN2A	HCAR3	HNF1A	C1S	TM4SF18	RHOH	PLAT	FRZB	PCSK2	CBS	G6PC
PTPN21	CHM	BHLHE40			SEPP1	ESM1	FAM43A	GAS8	RNF19B	PRR15	ARSE	TVP23B	IL1B	HNF1B	FBN1	TEK	TPSAB1	PDPN	CSPG4	SORBS2	VAV3	ACE
CHEK1	EGLN3	PLAUR			TXLNB	GPR4	CECR6	AVPI1	ALDH6A1	DDX27	NOX1	S100P	MMP1	IHH	CDR1	ELTD1	LTB	ADH1B	MYO1B	CADM2	CENPF	SLC30A10
ZWINT	PADI2	APBB2			TMEM100	ITGA11	KRT6B	ETFDH	ATP5F1A	QPRT	MEP1A	CLU	MMP3	KLF4	FHL1	CYYR1	GPR171	DPT	PTP4A3	FGL2	PTHLH	DNASE1
DDX20	CHP1	FGF1			PPARGC1A	CXADR	NOTCH3		VAPA	AP003774.4	SELENOP	SERPINB5	REG1A	LGR4	LMOD1	ZNF366	SLAMF1	SULF1	CRIP2	NRN1	IGFBP4	PLEKHG6
MRPL3	MGAT4A	TIMP3			CORO6	PYCR1	TMEM200A		PCM1	LCN15	DDC	CYR61	WNT5A	LGR5	NCAM1	SHE	CD247	AGT	COL4A2	ANK3	CYP11A1	CYP2B6
RPL35	MGLL	SERPINE1			FCRL4	OXTR	PIP4K2B		RNASE1	POFUT1	PID1	EPS8L1	LCN2	MMP9	DDR2	S1PR1	CTSW	TFPI2	HIGD1B	PRIMA1	SLCO3A1	CYP2D6
CDCA5	TMEM54	ANGPTL4			KLHDC1	EHD4	AFAP1L1		ALDOB	CPNE1	AIFM3	TRIM29		MSI1	ANTXR1	FLI1	HIST1H2AL	MFAP2	MYL9	AP1S2	PXDN	RAB30
GPRIN1	SLC25A25	LMCD1			SLC9A9	ANXA2	NUAK1		RIOK3	AREG	ST6GAL1	SDR16C5		MYBL2	CYGB	SDPR	PARP15	BMP4	UACA	NCAM1	EPHB3	IFIT1L
EPB41L4A-AS1	FBXO32	FGF1			CD5L	E2F7	C5orf46		LMAN1	MYC	CDHR1	PRSS2		MYC	TRO	SOX7	CIITA	ISLR	ACAN	CADM3	FZD2	SLC13A1
RMI2	CKB	SYNE1			SSBP2	SERPINE1	HAS2		LRP10	OSER1	FCGRT	RGS10		NEUROD1	CCDC80	HOXD3	HIST1H3A	NBL1	ADAMTS1	ITGB4	CHST11	CML5
SSX2IP	PABIR1	PGM2L1			RSPO1	RCN1	RAMP3		NDRG2	ZNF503	SPINK1	MYOF		NEUROG3	HTRA3	ESM1	CD79A	CCL11	ISYNA1	SAMHD1	MARVELD1	IL33
CLU	CLCN2	KAL1			GPD1L	TMED3	CDR2L		NAA38	SLC5A6	ESPN	TMEM92		NKX2-2	CCL11		NKG7	IGFBP6	HEYL	RASSF4	MEX3A	CYP3A4
SFXN4	PRAP1	TNFAIP6			TXNIP	CEACAM6	PLOD2		TFF3	NELFCD	GJB1	IFI16		NOTCH1	EDIL3		HIST1H4L	C1R	TAGLN	MT1E	PHGDH	SLC5A4
SERPINA3	SLC51B	OSGIN2			FHIT	IER5L	SDS		ACER3	DPM1	NXPE4	TYMP		NOTCH2	GALNTL2		PIK3R5	ALDH1A3	EDNRA	GFRA2	ESAM	C11ORF86
ADH1B	CNGA1	PODXL			FAM124A	VSNL1	CNN2		KIAA1522	FARP1	CHP2	CA9		NOX1	LHFP		SASH3	TRPA1	EFHD1	CD74	MPP3	LEAP2
CNN1	CMPK2	PCDH9			SNAP91	MET	GADD45A		SHROOM3	TP53RK	PKIG	TPGS1		PAX6	GGT5		GZMK	COL6A3	LHFPL6	NTM	BEX1	CYP2C44
IQGAP3	SGPP2	C13orf33			ZNF536	BHLHE22	HSPA12B		PLA2G10	ARHGAP45	PPP1R14D	CDC42EP1		PDX1	ACAN		HIST1H3F	THBS2	MAP1B	RALGPS2	ST3GAL3	CLEC2D
NUP35	COL17A1	RASGRP3			ZPBP2	EFNB2	SLC35E1		CCAR2	EIF6	SMAP1	BNIP3L		PPARD	UNC5C		IKZF1	CFH	PTK2	SEMA3C	TEAD2	CD36
COL12A1	KLF6	LOH3CR2A			FAM184A	CHPF	VAMP5		TOR4A	ACOT8	A1CF	STIM2		PTK6	WISP1		CD28	APOE	COL5A3	PLEKHB1	BCL2	GGT1
PM20D2	ADM	SPSB1			KIAA0513	KRT6B	LOX		CASC4	NKD1	TFCP2L1	LINC00467		RB1	ABCA9		ITK	SERPINE2	OLFML2B	EZR	PRICKLE1	CLIC5
FAM81A	SOWAHA	FN1			DNAJC27	BGN	SPSB4		HES4	CTNNBL1	THBS1	AGRN		RBPJ	PDE1A		CD37	MFAP4	CPM	ENDOD1	SOAT1	PTK6
CKAP2L	SHROOM1	GADD45B			MAOB	IER3	LAMP2		MPDU1	YWHAB	RETREG1	ME1		REG4	ADAMTSL3		CD69	CCDC80	SPARCL1	MYOT	LFNG	SPNS2
SYNPO2	CLDN4	TRIB1			VPS13D	PRDX4	LAMC2		RHOBTB3	TRIB3	MAPK13	RGS2		SOX9	EVC		LAIR2	EMILIN1	PLXDC1	SOX2	KLHL8	PRRX1
DKC1	CLDN3	HEY1			SEMA6A	NCOA7	SPSB1		RNF138	PSMA7	ATP10B	EGLN3		SPDEF	MOXD1			PLTP	JAG1	S100A10	HEBP2	GDE1
DMD	CLDN7	STK17B			PRKG2	CFI	LYZ		CHCHD10	TOP1MT	NUAK2	IFI6		STK11	SGCD			TMEM176A	SERPINI1	CHL1	TGIF2	CIDEC
TRDMT1	CLDN23	KLF7			ACACB	PLEK2	INHA		MFHAS1	RAB5IF	MAVS	FUT8		TGFBR2	MAB21L2			MFAP5	MEF2C	PTPRZ1	CD44	IFIT1
EEF1A1	TMEM37	LRRC8C			GNAZ	CEACAM5	CLDN1		FOXP1	MAPRE1	AKAP1	CD55		VAV	C9orf47			GREM1	FAM162B	COL28A1	TACC1	RHOC
EEF1G	PLEKHA7	FNIP2			TOX	KRT17	SLC24A3		VILL	AHCY	SHD	PMP22			CCL13			ZFP36L2	EPS8	FGFBP2		TREH
ZNF367	SERPINA12	TGFB2			NEIL1	GPX8	HAVCR2		AKAP13	ATP9A	KLC4	KDELR3			MFAP5			SFRP4	ADGRF5	SLC5A7		HSD17B6
EPHB2	TICAM1	FRMD4A			CRY2	S100A11	PLAUR		LGR4	CTSA	PHYH	CFD			SCARA5			OTULINL	RCAN2	TUBB2B		DPEP1
EPHB3	TLCD4	CNTN1			CASC1	LCN2	LACTB		PTPN18	RAE1		ANXA1			PLXDC1			TGM2	IGFBP2	NDRG2		SLC2A2
EPHB4	CTSE	TIMP3			EPM2A	TESC	MEOX1		GOLM1	NEU1		AC020656.1			PLAT			PCOLCE	CDH6	ARHGAP15		CYP3A43
ALDH1A1	CCNYL1	APBB2			SCGN	CCNO	LAIR2		AKT1	C8orf33		COL16A1			FST			SOD2	ENPEP	SORCS1		PCK1
ALDH1B1	ASPRV1	NGF			KCNIP3	EIF6	BDNF		POLD3	CDK5RAP1		KRT7			SFRP1			TNXB	ITGA1	TIMP4		NAT8
TMEM254-AS1	CXADR	NUAK1			BRS3	BHLHE40	EFHD1		ABO	GPSM2		ANKRD36C			PDGFRA			FHL2	PGF	VWA1		C6ORF145
FBN1	CYP3A7	TNFAIP6			KLK2	HKDC1	PTPRB		TENT5A	PRPF6		REG3A			BOC			PROCR	MTHFD2	TMOD2		LCT
SKA1	CYP3A5	EFNB2			BCL6	ALPK2	EVI5		LMNA	TOMM34		C4BPB			DZIP1			MXRA5	TESC	LRRTM1		CNDP1
FEN1	DENND5B	TSPAN2			DIRAS2	LOX	ECM1		VAMP2	SCML1		SYTL1			PLEKHH2			COL12A1	CLMN	CADM1		SLC2A5
GPC4	TRPV3	FN1			FNIP1	FADD	NDUFA4L2		CASZ1	STK4		KLK11			COL14A1			S100A13	C1QTNF1	SMIM5		OTOP3
TPX2	DEDD2	CHST11			PDE3B	TMEM200A	TWF2		ASAP2	DDAH2		RARRES3			DIO2			CD55	LURAP1L	C1orf198		ACE2
FOXM1	IFNLR1	STK17B			FSIP2	ICA1	GNA15		PPP3CA	RTF2		TFF2			SLC26A10			NSG1	ITGA4	UCHL1		KIAA1919
SULF1	MIER3	VEGFA			ADSSL1	FAM109A	SFRP4		TMED7	PMEPA1		DUSP4			COL8A1			TMEM119	EHD2	NOV		FMO5
ATP11A	DEFB1	BHLHE40			CA14	PLOD2	IL1RAP		FBXW5	FERMT1		TFF1			ISLR			CTSB	HES4	RCAN1		SPRR2G
FMOD	DIO3	EGR2			CXCL12	FOXQ1	ZNF813		GNAQ	PRELID3B		NDUFA4L2			COL11A1			MRC2	ARHGDIB	RHOB		MGAT4C
FN1	DPH1	DAAM1			IGSF11	CDR2L	ZMAT3		RCOR1	UCA1		AQP3			TNFAIP6			ETS2	ADAP2	EHBP1		ENPP3
ITGB3BP	DSC2	PALLD			UST	DPEP1	TMEM158		AP001816.1	GABRE		RAMP1			F2RL2			HTRA3	APOLD1	SCCPDH		APOC2
SH3BP4	RCAN1	FNIP2			TUB	FERMT1	TPM4		DIP2A	EIF2S2		F3			PCDH18			TMEM176B	SLIT3	COMT		OAS3
FLRT2	SLC26A2	GPR161			CDC42EP4	HS3ST3A1	CFI		RNF11	PDRG1		LYZ			OLFML2B			HSD17B2	KCNJ8	LPAR1		MAF
ARHGAP8	DUSP5	CALD1			DCAF5	HAVCR2	GPR4		P2RX4	NFS1		MUC5AC			KCNJ8			CXCL12	CAVIN3	COL21A1		TRIM15
KIF4A	EDN2	LOC728449			P2RY1	SLC12A8	ICAM1		NDUFV2	PCMTD2		TM4SF4			KIAA1755			LRP1	FRMD3	GAS7		PAPSS2
FYN	EDN3	TIMP3			ALDH8A1	CHSY1	SIX4		NBL1	RNF114					4-Sep			COL3A1	GJC1	ASPA		LRRC19
GAB1	EFNA1	FNIP2			NFASC	IRAK1	SALL4		IER3IP1	ANO9					FOXF1			COL8A1	SEPT4	CAB39L		AKR1B7
RASGEF1C	MPZL3	MGC16121			RGS9	LZTS1	SERPINE1		ERGIC1	FUNDC2					MRGPRF			LTBP2	PLN	CALM2		CYP2D26
RAD54B	EPHA2	HIVEP2			MAPK10	TOMM34	ETV5		CARD16	ZDHHC9					ASPN			DMKN	ABCC9	GFRA1		AI317395
COG4	ELF3	RHOU			ZNF235	C5orf46	CEBPB		PADI2	UTP14A					CH25H			EFEMP1	FOXS1	MT1M		APOC3
LRIG1	ELF4	KDM6B			CCDC136	ITGA2	HS3ST3A1		GPRIN3	STAU1					FOXL1			COL6A2	C2orf40	TTYH1		MOCOS
CNTNAP2	SPRED2	FOXP1			PDE4D	GNA15	FGR		PTPRF	DAB2					FNDC1			THBD	MAP3K7CL	GPR155		APOA4
GNL3	LIPH	ELMOD1			FAM131B	TSPAN17	NCOR2		CXXC1	COMMD7					WNT2B			SVIL	ADAMTS4	CHADL		SLC9A3
GCG	EMP1	SEMA7A			MTX3	LRRC8E	TPBG		GSTZ1	SERPINE2					PTGIS			COL1A1	S1PR3	FSTL3		IGSF9
GREM1	EPS8	PTHLH			TMEM59L	FNDC3B	PODXL		FFAR4	IFITM1					WBSCR17			EMID1	CCDC102B	HAND2-AS1		SLC15A1
BEX3	SLC36A1	PMEPA1			CHST9	GSTO1	BGN		SCP2	RNF113A					FBN2			CLMP	EGFLAM	SLC44A2		FAM3B
VPS41	ETV2	APBB2			PTBP2	CARS	ADAMTS6		MYO5C	FMR1					ITGA11			COL1A2	DSTN	SOX10		ST3GAL4
AMT	F2RL1	CDKN2B			ETFDH	UACA	CRIP2		DHRS1	PRAP1					SFRP4			HHIP	KRT18	HLA-DRA		OSGIN1
RPL13P5	F3	DAAM1			CAT	YRDC	VCAN		SLC9A1	UCKL1					CPZ			FENDRR	ACTN4	SCD		ADH4
SNHG10	RNF152	HAS2			ZCWPW1	APLN	GATA2		GSKIP	DNTTIP1					LOX			AEBP1	CYTOR	SHISA9		MOGAT2
RGMB	TBC1D32	TGFB2			ZNF780B	LRRC15	GRP		CRACR2B	ADRM1					MGC24103			SCARA5	NR2F2	TUBA1A		SLITRK6
NOB1	ADGRF4	ANGPTL4			KCNIP4	TMEM41A	ZNF668		CANT1	PROSER1					WNT2			ADM	STEAP4	CTNNAL1		SLC26A3
WDR91	PRR15	KLF7			NPTX1	SFRP4	SOCS5		GSR	GTF2F2					FIBIN			OLFML3	INPP4B	ANXA2		REG3A
CFHR1	FGL1	KDM6B			KCNB1	AP2S1	S100A12		SCNN1A	ASXL1					RASSF8			CDH11	CNN1	STARD13		CREB3L3
HUNK	FHL2	LMCD1			GPR162	ST6GALNAC5	IFNAR2		SMPDL3A	GID8					SMO			ICAM1	SOD3	ART3		MALL
ANXA13	AAK1	PGM2L1			PTH1R	RUNX1	FOLR3		PTGFRN	DKC1					MMP3			NEAT1	SYNE2	NRXN3		OSTALPHA
FOXN2	ALDOB	SNORD114-3			ENDOU	CLIC1	RCN3		SPRED1	GTF2IRD1					MEIS1			FBN1	RASGRP2	SERPINA5		SLC25A45
IARS1	ALDOC	GRB14			MIR600HG	TRIB3	UNC5B		MBP	NDRG3					WNT5A			WNT5A	NET1	ITGA6		CYP3A7
IMPDH2	PHLPP2	LIF			CLCN2	RAB2A	ST6GALNAC5		CLSTN1	NEK3					CHRDL1			PALLD	LPL	PDK4		CYP2C68
KCNMB1	ENDOD1	PTHLH			CDH12	FOXA2	CHSY1		BTBD6	STX16					RGMA			PTGDS	FABP4	HSPA12A		MEP1B
KCNN4	GGA2	CHST11			SAFB2	SALL4	NCF2		GPT	SERINC3					TNFSF11			MMP19	BGN	P3H2		ANPEP
KIF5C	TBC1D1	TSHZ3			ANTXR2	LEF1	CST1		STXBP6	CHCHD7					EPHA3							ALDH1A1
IPO5	COBL	PDLIM4			EPM2AIP1	CST1	RUNX1		TUBB2A	TIMM8A					KCNE4							PFKP
RPSA	FMO5	TSPAN2			RSPO2	PODXL	FTL		MPPE1	CARS2					PAMR1							UGT2B17
LBR	ARHGEF18	FOXP1			ANKS1B	RHBDF1	BHLHE22		TMEM30B	RRS1					HHIP							SLC26A6
LDHB	SPECC1L	LOC728264			SLCO4C1	RHOV	KIAA1217		LMF2	ZMYND8					GLI2							SLC6A20
PAIP2B	FOSL2	TSHZ3			MYCBPAP	GPR84	EGR2		PQLC1	TPD52L2					PPAPDC1A							OSTBETA
RGPD1	DDX58	ZNF365			ATM	TMEM184B	LZTS1		TMED10	PEPD					SMARCD3							IL18
MAD2L1	AMACR	HAS2			CPNE4	E2F3	BCAR1		AHNAK	CSE1L					GRP							TEX12
MAL	DAPK2	APBB2			ANK2	SMAGP	UACA		NUDT8	UCHL3					LRRC17							CHP2
MCM3	MKRN1	SERPINE1			PDE9A	KDELR2	LRRC15		MCU	SLC2A8					LRRN4CL							AKP3
MCM6	ALOX5	PDGFC			RABGAP1L	SRD5A1	KDELR3		C18orf32	CYB5B					COLEC12							UGT2A3
MKI67	ALPI	JUNB			CMTM5	PSME4	HSD3B7		SLC28A2	GAL					TFPI2							LOC728588
MTHFD1	PLA2G4F	PMEPA1			C2orf40	IFNAR2	EIF2AK4		DMBT1	PIGU					SPOCK1							F3
MTR	TOLLIP-DT	OSGIN2			ADAMTS19	TMEM44	BAZ1A		PDE4DIP	VAPB					TSHZ3							KRT20
MYBL2	TNFAIP8	CILP			OMA1	CDK6	TLR4		NEU4	PARD6B					PTGER3							EMP1
MYC	CHMP2B	PGM2L1			ZNF671	TIMP1	ITGA11		TNIK	NCOA3					ADAMDEC1
ZFHX3	HIGD1A	KDM6B			FHL1	NOS3	COL6A3		KIAA1468	RALY					MMP19
MYO9A	SPATS2L	BPGM			ARHGAP20	PVR	COL5A1		MIA2	C20orf27					PCDH7
ATIC	GBAP1	ARHGEF3			CHRNA3	SIX4	CTHRC1		FRMD4B	EDN1					ABCA6
RPL10A	GBP3	PGBD5			DISP1	VPS37C	GPC1		UNC13B	PHF20					TMEM119
NEK2	PTPN18	TAGLN3			TAPT1	MRPL17	CEACAM3		SLC22A23	DEFA6					MASP1
NHS	OR7E47P	PTHLH			ADAL	HSPA12B	TNIP3		HIPK2	DYNLRB1					GAS1
NME1	AMFR	TUFT1			RNF133	NDUFS6	ADAM12		NEO1	LAS1L					CYP7B1
OGDH	GGT3P	GPR183			EFHC2	DAP	FRMD5		IMPACT	SLC20A2					CCDC102B
OGN	TPK1	S1PR5			ZNF589	PECAM1	PROX1		IMPA2	YAE1D1					NEXN
OXCT1	GK	STK17B			DNAH5	VIL1	ASAP1		IQGAP2	IGBP1					FAM65C
PAFAH1B3	SDCBP2	CLDN4			SFRP5	RAMP3	VEZT		DGLUCY	FTL					OLFML1
PCDH7	TJP3	MBOAT2			ABHD1	DOHH	CCND1		FOXA3	KPNA3					DSEL
GMNN	NAAA	CNNM4			TRIM3	B3GALT6	FZD10		GSDMB	NKAP					CD302
MLXIPL	TNFRSF21	PMEPA1			LYST	PLCB4	TIMP1		EDEM3	PLAGL2					ADH1B
MECR	TINAG	CALD1			RIT2	TWIST1	HYAL2		RASD1	PQBP1					OGN
MRPS2	GNA11	DNAJB5			MAOA	CBX4	POSTN		CKAP4	RAB20
GPN3	SFN	C3orf52			AKAP7	LAIR2	ZNF430		CAMK2D	MRGBP
CHMP1A	LAMA1	DHRS2			PDE6B	SULT2B1	SPTY2D1		TCIRG1	IFT52
NUSAP1	LINC02904	SOX4			CR2	FAM89A	GPBAR1		SOCS6	SCAND1
DTL	TPRN	DNAJB5			GSTM5	MSMO1	DCBLD1		TCEA3	XRN2
DPH5	OSTM1	LOC728264			TMEFF2	TM7SF3	GOLGA2		UGT8	ARFRP1
GINS2	ANPEP	EPHA4			SIK3	IL1RAP	GZMB		S100A14	RB1CC1
LSM8	YPEL1	COL27A1			CNR2	FOXC1	PLA2G7		SLC9A2	NAA20
PGM5	GUCA2A	SMAD7			IL11RA	NOTCH3	GPX8		SLC25A37	RALGAPB
PLCB4	SAC3D1	F2RL1			ATP5L	FAM57A	PCDH17		ATP8B1	MPLKIP
PLK1	OSGIN1	KDM6B			MYCBP2	POF1B	DLC1		LPCAT4	ATP5F1E
PRRX1	GZMA	LOC100128178			H3F3B	ASPH	CLEC11A		CA7	EEPD1
POLE2	H1-2	RASL12			MAP2K6	SPINK1	NOD2		ENOSF1	OSBPL2
PIMREG	SLC40A1	SLC35F2			PTN	HS6ST2	PLVAP		IFI27L1	PROX1
UGT1A6	H2BC5	SETBP1			CLIP4	SDS	TMEM204		IGFBP2	C2
SYTL2	TAX1BP3	DOCK10			SLC16A7	CHMP4C	GJA1		LIMA1	SYS1
NCAPG2	HK2	C5orf13			SMARCA2	CLEC11A	FOXC1		SMAD2	NORAD
NAT10	HMOX1	DNAJC18			ABCB7	ZNF668	FKBP14		RGMB	FBL
BRIX1	HNF4A	DACT1			AVPI1	GRP	USP13		RASSF6	SLC7A6
HJURP	HPGD	WNT9A			C10orf76	CERS6	TMEM184B		FAM114A1	ERGIC3
PRELP	HSD17B2	ETV6			SEMA3D	NDFIP2	FKBP1A		PTAR1	SNRPB2
IL17RB	BIRC3	FGF18			RPS6KA5	GADD45A	CSF2		SH3BGRL3	PCIF1
AMBRA1	XIAP	HBEGF			ZNF45	SYAP1			SMIM14	RPN2
DEPDC1	IGSF3	TNC			OSBPL11	TMEM105			CLCA4	MCTS1
NHP2	SLC6A19	SDC1			TMEM116	ARL5B			CDKN2B	AURKA
DDX28	FAM221A	KIAA1755			NDUFB8	TMEM204			PIAS2	EIF3E
BEX1	IFNGR2	COL27A1			TOX4	FZD6			SAMD5	RAB22A
PBK	SERINC2	EDN1			C16orf78	TUBA1C			PPP4R1	IRS2
EXOSC5	EP400P1	HBEGF			CTNNA2	TMEM219			AKR7A3	STRAP
RGMA	IL2RG	ITGB6			ARHGAP15	EIF4E2			ANXA13	RBM39
STOX2	IL10RB	MURC			KIAA1328	DLC1			FGFBP1	BCAP31
DANCR	AQP7	PTGS2			USP20	ETV5			SLC37A1	CCDC85B
ELAPOR1	ISG20	EPHA4			ZNF407	ARHGAP18			C2orf88	CEBPB
PTPRO	JUNB	PLEK2			SCUBE1	TPMT			DENND2A	TBRG4
PYCR1	JUND	COL27A1			GOSR1	TAGLN2			FABP2	DCAF13
RAD51	AREG	RHOU			MMP27	ROMO1			GALNT5	RNF170
RCN1	KCNK1	LOC201651			FLJ25758	TPM4			MIA3	HELZ2
RFC3	KRT8	STEAP2			NPVF	ZNF696			NPDC1	ATP6V1H
RFC4	SLC6A10P	EDN1			TINF2	KCNQ1			AC005833.1	ZFAS1
EXOC4	KRT19	SLC46A3			SPATA9	PLXDC2			SLC35A1	GTF3A
GUF1	RHOC	LMCD1			ZNF304	ADAM12			SMCO4	MICU2
RPL5	RND3	SNX30			FAM49A	USP14			CYSTM1	COX19
RPL7A	RHOG	SOX4			PCDH15	SLC1A4			SYT13	PSPH
RPL12	LAMB3	RYBP			ERICH1	CARD10			NR3C2	FNTA
RPL21	LAMC2	SOX4			PXK	F12			GALNT12	NXT1
RPL31	FAM102A	TMEM49			CRHBP	GPRC5A			SMCHD1	NSDHL
RPS3	LMO7	MGC16121			AICDA	NXT1			GBP3	SPATA13
RPS5	LRP4	SORBS2			GKAP1	BCAR1			ST3GAL4	LAMP2
RPS6	GTF2H5	KDM6B			BHMT	FUT1			SLC6A14	DNAJC5
RPS8	LTK	PTGS2			EID3	ECM1			ABHD3	CCL20
RPS9	MXD1	LOC100128178			CTNND2	POSTN			NFIC	DARS
RPS14	SMAD3	HIC1			SPTSSB	MNX1			NR4A2	FTX
RPS19	ARSA	NEDD9			NCOA1	AMMECR1			TSPAN1	C6orf48
RPS27	MAP1B	ARHGEF40			ZNF2	SH3BGRL3			CA12	PRKDC
RRM2	MEN1	FN1			ZFP36L1	KRT80			TYMS	RP9
SMOC2	MEP1A	IFIH1			MTMR10	NUFIP1			CRIP1	DIDO1
MAGEF1	MELTF	GZMK			GABRQ	PPP1R14C			PLAC8	EIF3H
SLC39A8	ACHE	VEPH1			MFN2	SERPINE2			DEGS2	MRPS31
SFRP1	MME	EPHA4			ESYT3	FKBP14			CEP70	PET117
GREM2	MMP14	FOXP1			FMO2	AURKB			SIPA1L2	YTHDF1
ANAPC1	ASS1	PIK3CD			C11orf44	SLC35E1			CCDC68	RNASEH2B
RMND5B	MXI1	IL6			ATRNL1	GNPNAT1			CA2	C6orf222
DEPTOR	MYLK	YIPF5			CHMP7	DTD1			KCNK1	UTP23
SIM2	ATF3	SKIL			STAT6	NT5DC2			GSN	SINHCAF
MRPL1	NEDD9	RASD1			NEUROG3	HSD3B7			CRELD2	MRPS24
SMTN	NGF	JARID2			YTHDC1	C16orf59			PAPSS2	TRPC4AP
SLC12A2	ATP1B3	NEDD9			RGS2	ICAM1			CHD3	LYPLA1
SMARCA4	NPY	ETV6			BLVRB	GOLGA2			KLF9	NUDT4
STK33	OAS1	IL11			KBTBD3	PLVAP			MATN2	SPRYD7
LRRC61	P2RY2	SETBP1			GPLD1	GALNT6			FAM107B	ADIRF
SPINK1	PAPPA	SNAI1			ZNF540	RCN3			SGMS2	PCID2
BST1	VILL	SOX6			SLC22A7	MPZL2			GALNT1	PGRMC1
TAGLN	ACOX1	SYNE1			TMEM220	FZD10			DOCK5	SLC52A2
TARBP1	SSUH2	STK38L			ULK2	BICD1			TC2N	TWISTNB
TCF19	ABHD5	NKX3-1			ANKRD29	PPBP			PIGR	UPF3A
TFCP2	JPT1	CDH6			PIK3C2B	MEOX1			C12orf57	EPB41L5
LEFTY2	ZNF219	PELI1			CLCN6	COL6A3			HIF1A	TCF7
BYSL	NT5C3A	PRDM1			GAS8	GJA1			PTPRH	ZC3H13
TIMP3	PLAC8	PDPN			SHBG	ZNF69			GCNT3	SCARB1
TK1	PDE1A	WNT2			SLC17A3	BAZ1A			SMIM31	GNPDA1
TLE2	REV1	LMO4			XK	INHA			SEC24D	RNF6
TOP2A	PDE9A	C4orf26			SV2A	SLC25A17			RHBDL2	TRAP1
TP53	PDGFA	OSGIN2			USP8	CBX3			HID1	NCBP2
NR2C2	SIRT6	CACHD1			CTF1	GUK1			TSPAN13	CHD6
TRIP6	ENPP1	PRR5L			FBXO15	ZNF430			REG1B	PDPK1
TTK	ABCB1	SOX6			POLD3	NUDT1			GALNT7	TIMM17B
MUC5B	PI3	TMEM2			ANKS1A	TM4SF1			MAPRE2	HUS1
TUFT1	PLAUR	DDX10			SLITRK2	TMEM158			TMEM173	ASPSCR1
FAM72D	PLCD1	MTSS1			CABIN1	POMP			LXN	C1GALT1C1
TYMS	CLIC5	ARHGEF40			CBFA2T2	CECR6			TMEM263	UBAC2
UBA52	PLOD2	CLDN14			COLEC12	RPS6KA4			NUCB2	EXOSC5
ZNF10	PLXNA2	JHDM1D			SCN4B	TXNL4A			PLLP	EDEM2
ZNF84	PRR13	SLC19A2			SST	LAMC2			SERPINA1	VBP1
ZNF185	RETREG1	PLCE1			ENDOV	LACTB			BCAS1	HM13
IFRD2	XRN1	PRR9			ICA1L	REG1B			QSOX1	NDFIP2
ALG8	RHOF	MEGF9			OR2F1	PPME1			ANG	CHMP4C
MLPH	NDFIP2	GOPC			PIAS2	SLC5A1			AMN	RPUSD1
MRPL24	CTSA	MSC			FAM102A	SOCS5			ST6GALNAC1	SLC3A2
CENPU	GDPD2	PPP1R14C			STEAP4	HDGF			LMO4	CDK8
MORC4	PPM1A	PKNOX2			CHST4	ZNF74			ERN2	GLA
NARS2	CRYBG2	MSX2			ZNF704	RIN1			KLK1	VMA21
E2F8	UACA	SNCAIP			ACHE	CEBPB			KLF2	CSNK2A2
TCEAL4	PLEKHG6	SLC35F3			PDP2	SLC10A3			FOXA1	NAE1
KAT6A	RFK	ETV6			C5orf64	USP13			ANPEP	NIT2
PGAP1	SLC30A10	PRR5L			CACNG5	CNN2			ATP2A3	COMMD6
FRAS1	TENT5A	LOC727930			CEP95	SULT1C2			MUC4	TBC1D4
FHOD3	TMEM127	HS3ST3B1			SH2D1B	UPF3A			TNFRSF11A	NAA10
CDC7	PEX26	IL11			FAM9C	GPC1			REG1A	ABRACL
CDCA3	PKIB	MEOX1			LOC401052	FRMD5			TPSG1	UTP4
NUF2	INAVA	STK38L			LRRTM3	VDAC1			B3GNT7	LAGE3
CDCA7	PRKCD	SNCAIP			USF1	SERPINB5			CDC42EP5	LDHB
ARID5B	PAG1	E2F7			SIGLEC8	RALA			ENTPD8	SLC29A1
NOA1	GSDMB	AUTS2			ZNF268	TRAF2			VSIG2	GPALPP1
HPS3	CTTNBP2NL	FUT4			SYF2	SMYD2			MMP28	NIP7
CDIN1	MAPK3	DLX2			STXBP4	NIPSNAP3A			HSD17B2	TPX2
EBPL	MAPK6	ETV6			ZNF772	P4HB			RAP1GAP	MED30
SORBS2	GNG12	TBX3			APC2	ARRDC1			PALLD	MALSU1
BEX2	MAP2K5				ACAA2	HES1			MLPH	PAN3
C19orf48	TEX11				IGSF10	ARID3A			AGR2	TSC22D1
C1orf198	PRSS3				CRTC1	ENPEP			B3GALT5	LAPTM4B
ATOH8	PSG1				FAIM2	SNRPC			KIAA1324	DNAJC15
UTP4	B2M				FAM120AOS	ZMYND19			AGR3	PDP1
RERG	PSG4				PASD1	LAMP2			ASRGL1	OGFR
SLC45A3	PSG11				CERS4	CLK2			MUC1	EPB41L1
RUVBL1	AKR1B10				METTL16	CCNB1IP1			CREB3L1	SNRPB
HSD17B6	PDXP				SMAP2	FAM43A			IL1R2	SOX4
B4GALT2	CHMP1B				RASSF5	TNFRSF25			SPDEF	ZFAND1
CCNA2	TMCC3				IVL	GATA2			RARRES1	PAK1IP1
GYG2	CRACD				OR51G1	ATP8B1			LGALS2	CDK4
CCNB1	CGN				CYP1B1-AS1	PSRC1			REP15	HSD17B10
NAV3	IGSF9				SLC9A3	RCC2			SPON1	BOP1
ANGPTL1	NCEH1				COQ10A	FTL			PLA2G2A	GPCPD1
PKMYT1	SLC7A14				TGM4	DIABLO			L1TD1	MRPL13
CCNB2	POLD4				EIF3L	C6orf15			UGT2B17	CDC25B
EXO1	PTPRD				SARM1	YY1			HEPACAM2	SUCLA2
NEXN	NKX3-2				RASGRP2	SCO2			KCTD12	ESF1
NDUFAF2	PTPRH				RCAN2	ZNF813			LRRC26	C8orf59
AURKB	PTPRR				CASP8	SFTA2			MUC5B	IMMP2L
PTTG1	TP53INP2				KRT12	TBC1D4			SPINK4	BCL2L1
PXYLP1	SRPRB				OXER1	SLC25A22			RETNLB	NHLRC3
CACNA2D2	ABRACL				OR51A7	FAM122B			CLCA1	RPIA
SLC38A5	PLAAT4				BAALC	ASAP1			MUC2	AC004130.1
NREP	ACE2				LPAR3	CLDN4			FCGBP	ABHD12
ADAMTS1	RGS13				VAT1L	EGR2			CTSE	SLC35C2
EEF1E1	RPL21				CPLX4	DOPEY2			PYY	ARMC1
POLR1C	BDKRB2				ABTB1	ZMAT3			REG4	GOLGA7
TP53I11	SAT1				MST1	SAPCD2			SLC4A4	TXLNG
TESMIN	SCNN1A				DNMT3A	TNFRSF11B			ITLN1	CCT6A
DLGAP5	CEACAM1				TEKT1	LBX2				NUPL2
CDK1	CCL23				USP4	PIP4K2B				BLCAP
MELK	CARD9				ZNF280B	TFPT				CYP2S1
CDC6	SOX17				COQ9	LAMP1				CDC16
CDC20	SFTPB				FAN1	NCOR2				SMIM26
KIF14	SGCD				LSM14A	SFXN1				UBE2C
CDC25C	SGK1				MT1B	EVI5				UBA2
	PARP12				TRERF1	APRT				CCDC34
	GAREM1				HVCN1	AGRN				COPS5
	LRRC19				TTBK2	SLC29A2				ARL4A
	BMP2				PAN2	MTHFD2				SLC38A5
	SLC1A1				APOBEC2	BDNF				TXNDC9
	SLC2A1				CRADD	APOPT1				AVL9
	SLC3A1				IL9	SERPINA1				RBMX2
	SLC6A8				GABRR2	INSIG1				RIDA
	SLC9A1				EPHB6	SERP1				EMD
	SLC9A2					PABPC1				HIBADH
	SLC20A2					TMEM52				IPO5
	SLC22A5					CANT1				ARFGAP1
	SMPD1					CSTF2				MED4
	SP1					UNC5B				MRPS17
	DST					EFHD1				PEX16
	SPINT1					ARSK				RRP9
	SRI					FTSJ1				CAPZA2
	STX3					TNIP3				RPRD1B
	TCF7L2					UXT				ALKBH3
	TCN2					LMNB2				CTSH
	TFF1					NCF2				CXCL3
	THBS1					HEATR3				SUPT20H
	TLR3					CHTF18
	TMPRSS2					TAF1D
	C4A					FAM64A
	TST					EMID1
	UGCG					ZNF93
	UGP2					AGFG1
	UPP1					PHPT1
	VASP					CEACAM3
	VDR					NCEH1
	VEGFA					BACE2
	EZR					SPSB1
	VIPR1					VEZT
	CLIP2					KIF22
	TMEM50B					FZD2
	CA4					ADAMTS6
	RELL1					SEC61B
	CA12					CPN1
	RNF103					SLC35B1
	PAX8					C5orf15
	MALL					TCEA1
	FZD5					RAC1
	SLC25A23					OXNAD1
	C1orf116					VAMP5
	PLA2G7					LYZ
	PLEKHF2					SPTY2D1
	ZYG11B					CRB3
	C1orf115					GSTO2
	DNAI4					CSF2
	PDZD3					AFAP1L1
	DOCK5					S100A12
	PHC3					PTPRB
	SEMA6D					GPBAR1
	HKDC1					SLC1A7
	FAM214B					CEP72
	CCDC68					UBE2I
	TNKS2					SNX4
	MAP1LC3B					EIF2AK4
	H2AC6					EXOC4
	H2BC4					ISG20L2
	H3C10					SCAMP3
	H4C8					HIST1H1B
	ROPN1L					TSTA3
	TMEM120A					SAA2
	TMPRSS13					PLA2G7
	SGIP1					PSMA5
	C2orf88					ALG3
	DYRK2					NDUFA4L2
	PARD6B					CYP51A1
	GPAT3					NOD2
	MFSD2A					RAB25
	AIFM2					REPIN1
	PRSS12					FKBP1A
	SLC49A4					FGFRL1
	MIR22HG					PNP
	PAQR8					CHPF2
	TRIM5					ATOX1
	BCAS1					FGR
	RHPN2					RER1
	KMO					FAM167A
	VAMP8					LGR5
	TNFSF10					RAB3IP
	RIOK3					CRIP2
	BCL10					NOP16
	P4HA2					BAMBI
	STBD1					FARSB
	CCNG2					KDELR1
	KRT8P12					SPSB4
	MACIR					TPBG
	GPRC5A					POLR2G
	USP2					C4orf32
	ATP6V0D1					FBXO28
	GGTLC2					TLR4
	RABEP1					TWF2
	RSAD2					SEC24B
	LARGE1					CDS1
	IL32					NME2
	GCNT3					SLC24A3
	SLC9A3R1					LAMTOR2
	HS6ST1					DUOXA2
	RECQL5					OTUB2
	SYTL5					NUDT5
	EPSTI1					CYP4F11
	TP53INP1					DNAJC22
	ABCG2					FOLR3
	LITAF					SLC39A4
	APOBEC3B					HAS2
	PRDX6					SPTBN5
	GDA					LRP8
	ABCG1					HYAL2
	ISG15					NRAS
	MICAL2					HJURP
	LPIN2
	HDAC9
	CDA
	C2CD2L
	TRANK1
	JOSD1
	CDH1

## Sheet: CAF-Kieffer
Column1	Column2	Column3	Column4	Column5	Column6	Column7	Column8
ecm-myCAF	detox-iCAF	IL-iCAF	TGFβ-myCAF	wound-myCAF	IFNγ-iCAF	CAF-S1	Normal Fibroblast
ASPN	ADH1B	ITM2A	CST1	SFRP4	CCL19	LAMA2	ACACB
COL3A1	C7	CXCL12	LAMP5	CCDC80	VCAM1	SFRP4	ACSM5
THY1	CXCL12	FIGF	LOXL1	OGN	RBP5	PDGFRA	ADAMTS5
SFRP2	TNXB	FXYD1	EDNRA	DCN	CYP1B1	LRRC15	ADRB1
COL10A1	RSPO3	PLPP3	TGFB1	PTGER3	C7	GREM1	AGTR1
COL6A3	DCN	TNFRSF10D	TGFB3	SFRP2	TNFRSF4	SFRP2	AKR1C4
LRRC17	C16orf89	CTB-92J24.3	TNN	PDGFRL	CXCL13	KIAA1462	ANKRD20A4
CILP	GDF10	LAMC3	CST2	SMOC2	CXCL9	DCN	ANKRD31
GRP	PAMR1	C7	HES4	MMP23B	CCL2	CPXM2	AQP7
ITGBL1	FXYD1	ZBTB16	COL10A1	CPXM2	IL34	PTGFR	ARHGAP6
COL8A1	ZBTB16	CAPN6	ELN	COL14A1	ABI3BP	WNT2	ASPA
COL14A1	SLIT3	SCARA5	THBS4	ITGBL1	CYP7B1	ADAMTSL1	ATOH8
ADAM12	HSPB6	DLK1	NKD2	WISP2	F10	FBLN5	ATP1A2
OLFML2B	IL6	MEG3	OLFM2	CILP2	COLEC12	DPP4	ATP8B4
ELN	FBLN5	TAC1	COL6A3	COL8A1	CXCL10	P4HA3	BMP5
PLPP4	OGN	THUMPD3-AS1	LRRC17	GAS1	EMILIN1	CCDC80	C1QTNF7
CREB3L1	PLA2G2A	GMFG	COL3A1	COL3A1	GGT5	PRICKLE1	C4orf32
FBN1	CHRDL1	CYGB	THY1	OMD	EGFLAM	GALNT12	CA3
LOXL1	CYGB	CCL8	HTRA3	COL11A1	PLXDC1	ABI3BP	CAB39L
MATN3	FGF7	VCAM1	TMEM204	CILP	CXCL11	GALNTL2	CADM3
LRRC15	PI16	FMO2	SEPT11	NEXN	CCL8	RSPO3	CCDC69
COMP	PLAC9	FBLN5	COMP	ASPN	CXCL3	LOC100288077	CD14
ISLR	WISP2	COLEC12	TNFAIP6	RARRES2		PODN	CD34
P3H1	PTX3	PDGFD	ID4	FIBIN		CHRDL1	CD36
COL11A1	CCL2	GADD45G	GGT5	TMEM119		CILP	CDH6
SEPT11	CXCL3	SNAI1	INAFM1	KERA		PRDM6	CDHR3
NBL1		LSP1	CILP	ID4		CCL11	CDHR4
SPON1		CCL2	OLFML2B	GRP		CAPN6	CHRDL1
SULF1		IL6		COMP		PDGFRL	CIDEC
FNDC1		PTGS2		DPT		PTGS2	CLEC3B
CNN1		NR2F1		ELN		SEMA3D	COL21A1
MIAT		F10		FBLN2		DPT	COX4I2
MMP23B		CEBPA		IGF1		NOX4	CTSG
CPXM1		KDM6B		IGF2		ZFHX4	CYP21A2
FIBIN		PID1				EPYC	CYP3A5
P4HA3						DCHS1	CYP4B1
GXYLT2						DNM3	CYP4F12
CILP2						COL6A6	CYP4X1
P3H4						CPZ	DACT2
CCDC80						FLRT2	DGAT2
						NEGR1	DGKB
						BMPER	DNASE1L3
						LOC255480	DPY19L2
						CXCL12	EBF2
						HTRA3	EBF3
						DIO2	ECM2
						TNNT3	ESAM
						COL6A3	F10
						KCNK2	FAM162B
						KERA	FAM180B
						COL11A1	FBLN5
						STMN2	FHL5
						SYNDIG1	FNDC5
						ISLR	FRMPD1
						COL10A1	FZD4
						ADH1B	G0S2
						OMD	GDF10
						GAS1	GHR
						PTX3	GPD1
						FLNC	HBA1
						SPON1	HBA2
						CST1	HBB
						CNTN3	HBD
						COMP	HIGD1B
						CD177	HRCT1
						MFAP4	IL33
						LSP1	KANK3
						F13A1	KCNA2
						PLA2G2A	KCNAB1
						GDF10	KLF2
						UST	KRT222
						FHAD1	LIFR
						OGN	LMO3
						LIPG	LRAT
						SORCS2	LRP1B
						FGF7	MLXIPL
						ABCA9	NEGR1
						WISP2	NOVA1
						BEND6	NPR1
						ADH1C	NPY1R
						GRIA3	NTN1
						FAT4	NTN4
						FNDC1	PCOLCE2
						SCARA5	PGM5
						IGFL2	PID1
						KIAA1199	PLIN1
						PI16	PLIN4
						LOC728640	PPARG
						C3orf55	PPP1R1A
						AOX1	PRG2
						CLCN4	PXDNL
						HS3ST3A1	REEP1
						TMEM176B	RET
						CST2	S1PR1
						FBN1	SCARA5
						GXYLT2	SCARF1
						FGL2	SCN4A
						GABRB2	SCN4B
						COL3A1	SDPR
						SLC1A7	SEC14L5
							SEMA6C
							SERINC4
							SGCA
							SH2D1A
							SLC16A12
							SLC19A3
							SLC1A2
							SLC2A4
							SLC7A4
							SLC8A1
							SMOC1
							SPAG17
							SPRR2F
							STEAP4
							TCF7L1
							TEF
							TNMD
							TNNT3
							TNXB
							TPSAB1
							TPSB2
							TRHDE
							VIPR1
							VIT
							VSIG10L
							VWF
							WDR17
							WNT11
							ZDHHC11
							ZNF304
							ZNF839
