# Supplementary material for: Molecular portraits of colorectal cancer morphological regions
Source: eLife. 2023 Nov 13;12:RP86655. doi: 10.7554/eLife.86655 (PMC10642970; doi:10.7554/eLife.86655)
Supplement: Supplementary file 5. [file elife-86655-supp5.xlsx]

## Sheet: Content
These tables contain the results of differential expression analysis obtained using LIMMA,
showing the genes that are up-/down-regulated (with resepect to mean expression) in each of the six groups (morphotypes) of interest.
The gene expression was compared to average expression over whole dataset, the general model fitted was
lmFit(X[,<samples with a given morphotype>] - rowmeans(X))
where X is the expression matrix, with genes by rows and samples by columns.
Groups:	(not all necessary present here)
	CT	complex tubular
	DE	desmoplastic
	MU	mucinous
	PP	papillary
	SE	serrated
	TB	solid/trabecular
	NR	tumor-adjacent normal
	ST	tumor-supportive stroma

## Sheet: CT
Gene	logFC	AveExpr	t	P.Value	adj.P.Val	B
TMEM97	0.599707	0.599707	6.06853	2.04805e-07	0.00157253	6.66417
RPL13	0.28814	0.28814	6.03491	2.3039e-07	0.00157253	6.5615
CLDN1	0.735262	0.735262	5.82498	4.79844e-07	0.00231467	5.92082
TFDP1	0.47085	0.47085	5.48991	1.53723e-06	0.00524619	4.90181
CKS2	0.64172	0.64172	5.38024	2.24495e-06	0.00681018	4.56986
CDCA7	0.275133	0.275133	5.33587	2.61562e-06	0.00714116	4.43585
TPX2	0.493887	0.493887	5.20148	4.14887e-06	0.00943936	4.03112
ANLN	0.463012	0.463012	5.16271	4.73744e-06	0.00994935	3.9147
RAD54B	0.481508	0.481508	5.11931	5.49428e-06	0.0107146	3.78461
KRT18	0.555407	0.555407	5.02158	7.66303e-06	0.0138771	3.49252
HSPH1	0.545426	0.545426	5.00406	8.13251e-06	0.0138771	3.44031
CCT6A	0.337845	0.337845	4.93405	1.03093e-05	0.0165567	3.23204
PLK1	0.362531	0.362531	4.83214	1.45379e-05	0.0186107	2.93019
TMEM97P2	0.239874	0.239874	4.82251	1.50161e-05	0.0186107	2.90176
CSE1L	0.480982	0.480982	4.82123	1.50812e-05	0.0186107	2.89797
MIPEP	0.317041	0.317041	4.80545	1.59021e-05	0.0186107	2.85142
SNORA71D	0.449782	0.449782	4.797	1.63599e-05	0.0186107	2.82649
SNORA71C	0.465101	0.465101	4.71886	2.12527e-05	0.0205258	2.59671
PTTG1	0.353677	0.353677	4.67912	2.42669e-05	0.0220845	2.48024
PLBD1	0.465009	0.465009	4.65666	2.61512e-05	0.0223119	2.41457
CCT6P1	0.341767	0.341767	4.62783	2.87825e-05	0.02252	2.33038
EXOSC8	0.422676	0.422676	4.62006	2.95345e-05	0.02252	2.30774
ATIC	0.387609	0.387609	4.61843	2.96945e-05	0.02252	2.30299
DSN1	0.338659	0.338659	4.59114	3.25075e-05	0.023987	2.22352
SCD	0.317058	0.317058	4.57543	3.42437e-05	0.0246032	2.17784
DENND1A	0.315272	0.315272	4.54171	3.82822e-05	0.0253439	2.07997
RPL21P119	0.364675	0.364675	4.53618	3.89877e-05	0.0253439	2.06394
VKORC1L1	0.367975	0.367975	4.50877	4.26768e-05	0.0270968	1.98458
TPP2	0.354335	0.354335	4.43698	5.40307e-05	0.0322494	1.77755
RPSAP49	0.265684	0.265684	4.43652	5.41138e-05	0.0322494	1.7762
COA6	0.485665	0.485665	4.43527	5.43357e-05	0.0322494	1.77261
PFDN4	0.580004	0.580004	4.41905	5.72987e-05	0.0330373	1.72602
MLXIPL	0.266418	0.266418	4.4149	5.80833e-05	0.0330373	1.71408
CERS6	0.483489	0.483489	4.39764	6.14549e-05	0.0339015	1.66458
RPL21P7	0.27726	0.27726	4.34525	7.29036e-05	0.03826	1.51472
NAA16	0.389308	0.389308	4.34235	7.35953e-05	0.03826	1.50644
FAM86B1	0.235841	0.235841	4.33736	7.48e-05	0.03826	1.4922
TFAM	0.263873	0.263873	4.33379	7.56737e-05	0.03826	1.48201
HMGB1P10	0.437419	0.437419	4.31221	8.11676e-05	0.0400358	1.42055
BRCA2	0.314158	0.314158	4.30862	8.21186e-05	0.0400358	1.41034
HSPE1P7	0.345252	0.345252	4.29779	8.5055e-05	0.0406935	1.37953
HJURP	0.402446	0.402446	4.28777	8.78622e-05	0.0406935	1.35106
CDK8	0.454818	0.454818	4.2875	8.79393e-05	0.0406935	1.35029
SEC23IP	0.303729	0.303729	4.27183	9.25151e-05	0.0414073	1.30582
POLQ	0.358158	0.358158	4.23425	0.000104451	0.0458156	1.19945
RPSAP53	0.244087	0.244087	4.22222	0.00010858	0.0458156	1.16548
RPL21	0.365219	0.365219	4.22159	0.000108802	0.0458156	1.16369
SLC7A5	0.378882	0.378882	4.21719	0.000110355	0.0458156	1.15127
DIAPH3	0.349386	0.349386	4.21224	0.000112126	0.0458156	1.13732
LACTB2	0.461761	0.461761	4.20291	0.000115545	0.0461454	1.111
SETP3	0.238871	0.238871	4.19428	0.000118794	0.0461454	1.0867
HSPE1P14	0.296723	0.296723	4.19113	0.000120003	0.0461454	1.07783
SERBP1	0.201834	0.201834	4.18327	0.000123069	0.0466669	1.05573
FNBP1L	0.315046	0.315046	4.16772	0.000129362	0.0483812	1.01204
HSPE1P6	0.493624	0.493624	4.16244	0.000131572	0.0485431	0.9972
RPL21P39	0.288395	0.288395	4.15433	0.000135032	0.0491552	0.974467
EZH2	0.368781	0.368781	4.14855	0.000137553	0.0494142	0.958265
PM20D2	0.371932	0.371932	4.13942	0.000141629	0.049767	0.93269
SNORD22	0.488682	0.488682	4.13671	0.000142865	0.049767	0.925084
MRPL16	0.281658	0.281658	4.1289	0.000146471	0.049767	0.903257
FRG1	0.354264	0.354264	4.1195	0.000150934	0.0502536	0.876975
CCDC34	0.292563	0.292563	4.07665	0.000173005	0.0549229	0.757505
RPS2	0.313438	0.313438	4.07241	0.000175355	0.0550293	0.745694
XRCC2	0.387913	0.387913	4.06822	0.000177705	0.0551331	0.734043
LSM8	0.318018	0.318018	4.06218	0.000181141	0.0555675	0.717287
TOMM34	0.363119	0.363119	4.05865	0.000183185	0.0555703	0.707465
RPS7P14	0.28075	0.28075	4.05153	0.000187366	0.0560445	0.687719
NPM1P39	0.230051	0.230051	4.04904	0.000188854	0.0560445	0.680798
ALG1	0.255421	0.255421	4.04062	0.00019396	0.0569407	0.657461
PPIAP22	0.271957	0.271957	4.02764	0.000202096	0.0580803	0.621512
RPL21P11	0.271866	0.271866	4.01481	0.000210461	0.0598543	0.586036
SNRPGP2	0.171398	0.171398	4.0023	0.000218943	0.0616246	0.551482
PABPC1P1	0.321021	0.321021	3.99356	0.00022506	0.0626999	0.527386
RPL13P12	0.223468	0.223468	3.98311	0.000232596	0.0641448	0.498589
CDKN3	0.504549	0.504549	3.97478	0.000238772	0.0645441	0.475678
PPIAP2	0.175656	0.175656	3.96317	0.000247656	0.0656457	0.443744
EIF2S2	0.367635	0.367635	3.9472	0.000260395	0.0665901	0.399905
FERMT1	0.524373	0.524373	3.94534	0.000261914	0.0665901	0.394822
PRR11	0.308013	0.308013	3.9419	0.000264756	0.0665901	0.385389
PDCD2L	0.416683	0.416683	3.94116	0.000265371	0.0665901	0.383365
RPL8	0.376888	0.376888	3.93826	0.000267797	0.0665901	0.375412
GPX2	0.369285	0.369285	3.93433	0.000271113	0.0665901	0.364657
SCDP1	0.268878	0.268878	3.93242	0.000272743	0.0665901	0.359421
TMC5	0.462287	0.462287	3.92666	0.000277712	0.0665901	0.343645
OCLN	0.318824	0.318824	3.92627	0.000278051	0.0665901	0.342579
CD46	0.336339	0.336339	3.92264	0.000281222	0.0665901	0.332674
ARMC10	0.26712	0.26712	3.92089	0.00028277	0.0665901	0.327877
RPL37AP8	0.22643	0.22643	3.91797	0.000285365	0.0665901	0.319896
MACC1	0.437114	0.437114	3.90625	0.000296015	0.0681333	0.287889
RRS1	0.212035	0.212035	3.90522	0.00029697	0.0681333	0.285077
HMGA1P3	0.206491	0.206491	3.88201	0.000319273	0.0726399	0.221836
STIP1	0.324833	0.324833	3.87597	0.000325335	0.0734074	0.205414
ATAD2	0.282855	0.282855	3.86773	0.000333791	0.0740908	0.183011
KPNA2	0.261937	0.261937	3.85641	0.000345751	0.0757136	0.152282
SNORD102	0.363875	0.363875	3.85557	0.000346648	0.0757136	0.150019
PA2G4	0.300905	0.300905	3.8433	0.000360122	0.0772733	0.116739
CMTM8	0.330799	0.330799	3.84044	0.000363328	0.0772733	0.109004
RPL21P42	0.268955	0.268955	3.83886	0.000365111	0.0772733	0.104733
HSPE1P2	0.355931	0.355931	3.83222	0.000372706	0.0779839	0.0867681
UFM1	0.324347	0.324347	3.82816	0.000377428	0.0779839	0.0757836
CDCA5	0.245442	0.245442	3.82676	0.000379063	0.0779839	0.0720105
HSPB11	0.204238	0.204238	3.82606	0.000379894	0.0779839	0.0701013
SAP18	0.34929	0.34929	3.82014	0.000386916	0.0785131	0.0541229
PRRT3-AS1	0.281671	0.281671	3.81905	0.000388223	0.0785131	0.0511795
RPL21P1	0.246258	0.246258	3.80272	0.000408326	0.0819715	0.00714256
LIMK1	0.283177	0.283177	3.79953	0.000412378	0.0821806	-0.00146813
SKA3	0.19186	0.19186	3.79609	0.000416771	0.0824542	-0.0107096
RPL21P127	0.303197	0.303197	3.78965	0.000425145	0.082581	-0.0280576
DDAH1	0.305299	0.305299	3.78863	0.000426486	0.082581	-0.0308024
MKI67	0.298891	0.298891	3.78464	0.000431754	0.082606	-0.0415064
GLO1	0.351055	0.351055	3.78396	0.000432666	0.082606	-0.0433469
CYP51A1	0.385799	0.385799	3.77584	0.000443633	0.0841117	-0.0651709
UMPS	0.218807	0.218807	3.76226	0.000462558	0.0858256	-0.101584
ZDHHC9	0.318545	0.318545	3.75907	0.000467115	0.0858256	-0.110128
SMARCC1	0.279672	0.279672	3.75754	0.000469318	0.0858256	-0.11423
RPL7P2	0.38986	0.38986	3.75595	0.000471621	0.0858256	-0.118495
RANP1	0.328968	0.328968	3.7536	0.00047504	0.0858256	-0.124789
BRCC3	0.272152	0.272152	3.7517	0.000477822	0.0858256	-0.129879
UBXN2A	0.198267	0.198267	3.74672	0.00048518	0.0865776	-0.143195
DKC1	0.377038	0.377038	3.74281	0.000491031	0.0870527	-0.15364
RPL21P134	0.2997	0.2997	3.73281	0.000506316	0.0883049	-0.180347
DNAJC5	0.218118	0.218118	3.72884	0.000512521	0.0884188	-0.190958
NIP7	0.23605	0.23605	3.72731	0.000514929	0.0884188	-0.19504
GPR180	0.27857	0.27857	3.71535	0.000534128	0.0902715	-0.226924
NDUFAF6	0.539255	0.539255	3.71378	0.000536686	0.0902715	-0.231085
ALG5	0.336418	0.336418	3.71332	0.000537455	0.0902715	-0.232332
RPS21P4	0.430502	0.430502	3.71223	0.000539248	0.0902715	-0.235233
POMP	0.310154	0.310154	3.70906	0.000544484	0.0902715	-0.243648
PMS2P3	0.225509	0.225509	3.70842	0.000545557	0.0902715	-0.245362
CKS1BP7	0.293169	0.293169	3.70195	0.000556439	0.0915175	-0.26256
RPSAP19	0.260656	0.260656	3.6849	0.000586144	0.0939874	-0.307835
NOB1	0.229152	0.229152	3.68398	0.000587795	0.0939874	-0.310284
HPS6	0.178696	0.178696	3.68309	0.000589383	0.0939874	-0.312632
BCL2L12	0.285908	0.285908	3.68185	0.000591627	0.0939874	-0.315939
PDP2	0.238232	0.238232	3.67978	0.000595365	0.0939874	-0.321421
PERP	0.320467	0.320467	3.67778	0.000598996	0.0939874	-0.326713
UCHL3	0.363516	0.363516	3.67086	0.000611751	0.0943617	-0.345049
E2F8	0.416622	0.416622	3.66048	0.00063136	0.0963411	-0.372503
SNRPB2	0.349801	0.349801	3.66033	0.00063164	0.0963411	-0.372889
EPHB2	0.335058	0.335058	3.65638	0.000639262	0.0969618	-0.383323
HSPE1	0.531036	0.531036	3.64615	0.000659422	0.0981494	-0.410333
PFDN6	0.218566	0.218566	3.64507	0.00066159	0.0981494	-0.413188
DNAJC2	0.318363	0.318363	3.64378	0.000664179	0.0981494	-0.416586
PARD6B	0.270101	0.270101	3.63729	0.00067736	0.0994263	-0.433676
NDC1	0.335886	0.335886	3.63212	0.000688043	0.100454	-0.447284
DNAJC16	0.34575	0.34575	3.62307	0.000707149	0.102695	-0.471099
EIF3E	0.487872	0.487872	3.61735	0.000719487	0.103934	-0.486137
CDC6	0.30433	0.30433	3.61413	0.000726527	0.104114	-0.494601
RPL7P58	0.338481	0.338481	3.59784	0.000763115	0.108513	-0.537304
SKP2	0.307347	0.307347	3.5919	0.000776891	0.1099	-0.552849
THAP5P1	0.203369	0.203369	3.58658	0.000789443	0.1111	-0.566775
GNL3	0.344511	0.344511	3.58141	0.000801816	0.11179	-0.580284
BUB1	0.360192	0.360192	3.57942	0.000806628	0.11179	-0.585482
CHAF1B	0.217593	0.217593	3.57262	0.000823295	0.112568	-0.603247
STIL	0.280402	0.280402	3.57208	0.000824615	0.112568	-0.604638
MELK	0.301416	0.301416	3.56305	0.000847292	0.114252	-0.628198
DAND5	0.144266	0.144266	3.56225	0.000849326	0.114252	-0.630279
SPNS2	0.239867	0.239867	3.56218	0.000849507	0.114252	-0.630464
MDH2	0.24341	0.24341	3.55881	0.000858124	0.114433	-0.639228
SLC12A2	0.441355	0.441355	3.55838	0.000859233	0.114433	-0.640349
BOLA2	0.356213	0.356213	3.55371	0.000871361	0.114927	-0.652519
PPIAP7	0.188604	0.188604	3.55043	0.000879963	0.115111	-0.661046
PTGES3	0.293481	0.293481	3.54795	0.000886526	0.115111	-0.667497
AURKA	0.282248	0.282248	3.54539	0.000893351	0.115111	-0.674154
CDK1	0.334376	0.334376	3.54327	0.000899017	0.115111	-0.679642
PON2	0.235841	0.235841	3.54308	0.000899527	0.115111	-0.680135
ALG3	0.191611	0.191611	3.53985	0.00090826	0.115111	-0.68852
GGCT	0.289736	0.289736	3.53981	0.00090837	0.115111	-0.688625
RPL30P7	0.319258	0.319258	3.53978	0.000908463	0.115111	-0.688714
CCNA2	0.38675	0.38675	3.5362	0.000918247	0.115111	-0.698011
PSMG1	0.471273	0.471273	3.53587	0.000919136	0.115111	-0.698851
CEBPZOS	0.217581	0.217581	3.52531	0.000948608	0.117722	-0.726238
LTV1	0.195627	0.195627	3.51685	0.000972859	0.118982	-0.748138
TCF20	0.291713	0.291713	3.5149	0.000978549	0.118982	-0.753198
PSMA2	0.322359	0.322359	3.51336	0.000983038	0.118982	-0.757167
NUP58	0.285539	0.285539	3.50891	0.000996169	0.118982	-0.768676
RPL21P2	0.249314	0.249314	3.50851	0.000997336	0.118982	-0.769692
TATDN1	0.416789	0.416789	3.5083	0.000997977	0.118982	-0.770249
RAD51AP1	0.310724	0.310724	3.50646	0.00100347	0.119116	-0.775011
HSPE1P3	0.20409	0.20409	3.49592	0.00103543	0.122378	-0.802201
RPS15AP36	0.185692	0.185692	3.49425	0.0010406	0.122459	-0.806518
HSPE1P8	0.390353	0.390353	3.48461	0.00107084	0.125477	-0.831352
MRPL33	0.220337	0.220337	3.4789	0.00108912	0.125832	-0.846024
UGGT2	0.309982	0.309982	3.47353	0.00110661	0.125832	-0.859826
ZNF384	0.183016	0.183016	3.47345	0.00110688	0.125832	-0.860044
SCCPDH	0.2767	0.2767	3.47233	0.00111056	0.125832	-0.862917
PSMB2	0.267178	0.267178	3.47176	0.00111244	0.125832	-0.864381
PSMA7	0.234546	0.234546	3.4702	0.0011176	0.125832	-0.868395
C2orf49	0.179649	0.179649	3.4698	0.00111891	0.125832	-0.86941
NDUFA4	0.405631	0.405631	3.46957	0.0011197	0.125832	-0.870017
RP9P	0.246047	0.246047	3.46888	0.00112197	0.125832	-0.871778
CHAC1	0.177141	0.177141	3.46799	0.00112495	0.125832	-0.874071
PTDSS1	0.293385	0.293385	3.46672	0.00112918	0.125832	-0.877325
STOML2	0.295469	0.295469	3.45513	0.00116857	0.129167	-0.907034
TMEM63A	0.274544	0.274544	3.45256	0.00117749	0.129312	-0.913617
RPL29P33	0.197664	0.197664	3.45203	0.00117936	0.129312	-0.914991
NOLC1	0.253555	0.253555	3.44822	0.00119269	0.129916	-0.924729
RPS13	0.337361	0.337361	3.44571	0.00120159	0.129987	-0.931164
RBL1	0.313655	0.313655	3.44294	0.00121146	0.129987	-0.93825
PDP1	0.357466	0.357466	3.4429	0.00121157	0.129987	-0.938331
SNORA71B	0.1918	0.1918	3.44201	0.00121477	0.129987	-0.940612
RAB11FIP1	0.332514	0.332514	3.44088	0.00121883	0.129987	-0.943506
SRP9P1	0.226749	0.226749	3.43442	0.00124229	0.131945	-0.960014
ADK	0.246977	0.246977	3.43317	0.00124687	0.131945	-0.963195
VDAC1	0.298484	0.298484	3.42896	0.00126245	0.132086	-0.973949
CHORDC1	0.308061	0.308061	3.42734	0.00126849	0.132086	-0.978082
RPL21P116	0.170456	0.170456	3.42381	0.00128173	0.132086	-0.987066
GPR89B	0.253174	0.253174	3.42372	0.00128206	0.132086	-0.987292
MRPL11	0.203856	0.203856	3.42089	0.00129282	0.132694	-0.994523
ARMC10P1	0.255833	0.255833	3.41788	0.00130431	0.133021	-1.00218
CACYBP	0.386008	0.386008	3.4175	0.00130576	0.133021	-1.00314
STAM	0.361902	0.361902	3.41313	0.00132265	0.133477	-1.01427
RPL7AP11	0.168659	0.168659	3.41131	0.00132974	0.133477	-1.01889
PARPBP	0.303927	0.303927	3.41034	0.00133355	0.133477	-1.02137
EIF6	0.285235	0.285235	3.40992	0.00133519	0.133477	-1.02243
USP1	0.305928	0.305928	3.40863	0.00134028	0.133477	-1.02572
LYRM1	0.275208	0.275208	3.40822	0.00134189	0.133477	-1.02676
RPSAP55	0.221907	0.221907	3.40757	0.00134445	0.133477	-1.02841
NFS1	0.246949	0.246949	3.40355	0.00136043	0.134113	-1.03863
WDR4	0.177861	0.177861	3.4028	0.00136342	0.134113	-1.04054
RPL12P42	0.174203	0.174203	3.40226	0.00136559	0.134113	-1.04191
FANCD2	0.236643	0.236643	3.40046	0.00137282	0.13434	-1.04648
RNF6	0.341221	0.341221	3.3982	0.00138196	0.134751	-1.05222
GOT2	0.253535	0.253535	3.39474	0.00139602	0.135156	-1.06097
RPL21P12	0.177619	0.177619	3.39098	0.0014115	0.136173	-1.07051
MYCBP	0.373574	0.373574	3.38772	0.00142506	0.136681	-1.07878
PVT1	0.347613	0.347613	3.38731	0.00142678	0.136681	-1.07983
MCUR1	0.381889	0.381889	3.38466	0.00143789	0.137264	-1.08653
SNORD19	0.313895	0.313895	3.38142	0.0014516	0.138088	-1.09473
TMEM254	0.252115	0.252115	3.37976	0.00145864	0.138088	-1.09892
HSPA14	0.255965	0.255965	3.37905	0.0014617	0.138088	-1.10073
BZW2	0.205865	0.205865	3.37601	0.00147476	0.138378	-1.10842
NUFIP1	0.344455	0.344455	3.37597	0.00147491	0.138378	-1.10851
SCARNA22	0.274714	0.274714	3.36725	0.00151297	0.140419	-1.13053
TM9SF2	0.256968	0.256968	3.36699	0.00151415	0.140419	-1.13121
DLEU2	0.364491	0.364491	3.36629	0.00151724	0.140419	-1.13297
RPL12P37	0.137554	0.137554	3.36513	0.00152238	0.140419	-1.13589
CNOT1	0.258066	0.258066	3.36338	0.00153019	0.140664	-1.14031
SNORD72	0.39375	0.39375	3.35769	0.00155581	0.141913	-1.15466
MVD	0.139899	0.139899	3.35618	0.00156267	0.141913	-1.15846
DNAJC15	0.298611	0.298611	3.35578	0.0015645	0.141913	-1.15947
CWC15	0.202257	0.202257	3.35576	0.00156457	0.141913	-1.15952
TTK	0.402996	0.402996	3.34746	0.00160288	0.143394	-1.18041
TMEM41A	0.174699	0.174699	3.34726	0.00160384	0.143394	-1.18093
ABCE1	0.260663	0.260663	3.34679	0.00160602	0.143394	-1.1821
BOLA2B	0.281051	0.281051	3.34655	0.00160716	0.143394	-1.18272
PRELID3B	0.287701	0.287701	3.33744	0.0016503	0.146015	-1.2056
SORD	0.30712	0.30712	3.33623	0.00165614	0.146015	-1.20865
RSC1A1	0.232762	0.232762	3.33523	0.00166097	0.146015	-1.21116
RPS21	0.539802	0.539802	3.33475	0.00166327	0.146015	-1.21236
HSD17B7P2	0.258842	0.258842	3.33074	0.00168276	0.146676	-1.22242
CBX3P9	0.230028	0.230028	3.32719	0.00170019	0.146676	-1.23131
FDX1	0.308428	0.308428	3.32685	0.00170186	0.146676	-1.23216
STK26	0.269957	0.269957	3.32486	0.00171175	0.146676	-1.23716
HMGB1	0.320766	0.320766	3.32484	0.00171185	0.146676	-1.23721
SNRPGP10	0.276479	0.276479	3.32447	0.00171369	0.146676	-1.23814
INTS7	0.238394	0.238394	3.32445	0.00171378	0.146676	-1.23819
PRIM2	0.313847	0.313847	3.32288	0.00172159	0.146884	-1.24211
KRT18P60	0.216367	0.216367	3.3209	0.00173153	0.146928	-1.24708
ZNF736	0.182244	0.182244	3.32063	0.00173287	0.146928	-1.24775
POLR1E	0.192617	0.192617	3.3158	0.00175732	0.148081	-1.25984
CHCHD3	0.235796	0.235796	3.31416	0.0017657	0.14833	-1.26395
UBE2C	0.252244	0.252244	3.31074	0.00178328	0.149347	-1.2725
KRTCAP3	0.270362	0.270362	3.3072	0.00180164	0.150144	-1.28134
TRIP13	0.22535	0.22535	3.30679	0.00180379	0.150144	-1.28237
RPL7P6	0.267972	0.267972	3.30319	0.00182268	0.150797	-1.29136
DDX21	0.204641	0.204641	3.30097	0.0018344	0.151308	-1.29689
EXOSC2	0.157275	0.157275	3.29944	0.00184258	0.151524	-1.30072
RPS2P46	0.31686	0.31686	3.29506	0.00186605	0.152927	-1.31164
SNORD36C	0.355779	0.355779	3.29417	0.00187083	0.152927	-1.31385
NDFIP2	0.247476	0.247476	3.29163	0.00188462	0.153594	-1.32018
RPL12P21	0.173361	0.173361	3.28887	0.00189968	0.154224	-1.32705
TFRC	0.359119	0.359119	3.28815	0.00190365	0.154224	-1.32885
RPS5	0.214145	0.214145	3.28016	0.00194802	0.156044	-1.34872
CEP55	0.245503	0.245503	3.27568	0.00197337	0.156044	-1.35986
DIMT1	0.180578	0.180578	3.27536	0.00197515	0.156044	-1.36064
YWHAZP2	0.277054	0.277054	3.27535	0.00197521	0.156044	-1.36067
TXNP1	0.34184	0.34184	3.27425	0.00198152	0.156044	-1.36342
RPL21P120	0.24945	0.24945	3.27347	0.00198593	0.156044	-1.36533
PES1	0.168639	0.168639	3.27218	0.00199335	0.156044	-1.36855
DBF4P1	0.21589	0.21589	3.27197	0.00199454	0.156044	-1.36906
GGH	0.353524	0.353524	3.27194	0.0019947	0.156044	-1.36913
PARP12	0.182203	0.182203	3.26854	0.00201436	0.157096	-1.37759
WDR82	0.184405	0.184405	3.26672	0.00202494	0.157096	-1.3821
SORD2P	0.309813	0.309813	3.26664	0.00202541	0.157096	-1.3823
CNIH4	0.467073	0.467073	3.26302	0.00204658	0.157841	-1.39126
SUGT1	0.371739	0.371739	3.26116	0.00205757	0.158242	-1.39588
UBE2I	0.163919	0.163919	3.25794	0.00207671	0.159265	-1.40386
RPL35AP19	0.248177	0.248177	3.25421	0.00209904	0.160527	-1.41307
CCT5	0.292795	0.292795	3.25158	0.00211498	0.160845	-1.41959
POLR1D	0.225055	0.225055	3.25047	0.0021217	0.160908	-1.42232
BRCA1	0.216145	0.216145	3.24441	0.00215889	0.161929	-1.43729
UBFD1	0.219487	0.219487	3.24242	0.00217128	0.162411	-1.44221
LSM5	0.284367	0.284367	3.23133	0.00224134	0.16627	-1.46956
PIP5K1B	0.181628	0.181628	3.23042	0.00224721	0.16627	-1.47182
CKAP2	0.353047	0.353047	3.22687	0.00227013	0.166744	-1.48055
RPLP2	0.28918	0.28918	3.22659	0.00227194	0.166744	-1.48124
ANKRD23	0.174789	0.174789	3.2247	0.00228423	0.166974	-1.48588
MGAM2	0.654532	0.654532	3.22405	0.00228846	0.166974	-1.48747
TMUB1	0.178702	0.178702	3.2233	0.00229343	0.166974	-1.48934
RPS7P11	0.445483	0.445483	3.21989	0.00231587	0.168024	-1.49772
ORC5	0.31015	0.31015	3.21786	0.00232929	0.168239	-1.50269
RPL10P1	0.208794	0.208794	3.21599	0.00234177	0.16835	-1.50729
SLC7A1	0.311374	0.311374	3.21362	0.00235771	0.16835	-1.51313
RPS15AP17	0.337243	0.337243	3.21351	0.00235844	0.16835	-1.51339
RPA3	0.444546	0.444546	3.2131	0.00236116	0.16835	-1.51439
TIAL1	0.209278	0.209278	3.21185	0.0023696	0.16835	-1.51746
NCKIPSD	0.151264	0.151264	3.2112	0.00237399	0.16835	-1.51905
PPIAP15	0.155129	0.155129	3.20675	0.0024043	0.169181	-1.52996
APCDD1L	0.157323	0.157323	3.20565	0.00241186	0.169276	-1.53266
KLF5	0.320821	0.320821	3.20273	0.00243203	0.170255	-1.53983
HSPD1P1	0.186527	0.186527	3.20123	0.00244244	0.170546	-1.5435
UBE2CP1	0.198316	0.198316	3.19857	0.00246103	0.171084	-1.55002
GTF3C3	0.207883	0.207883	3.19784	0.00246613	0.171084	-1.5518
TRMT6	0.25959	0.25959	3.19744	0.00246895	0.171084	-1.55279
LYAR	0.290804	0.290804	3.19599	0.00247913	0.171355	-1.55632
TRMT112	0.222861	0.222861	3.19498	0.00248626	0.171414	-1.55879
ZSWIM1	0.230292	0.230292	3.19188	0.00250832	0.17148	-1.56639
C1QBP	0.289099	0.289099	3.19181	0.0025088	0.17148	-1.56656
ARL3	0.188135	0.188135	3.19155	0.00251067	0.17148	-1.5672
STOX1	0.280379	0.280379	3.19131	0.00251235	0.17148	-1.56777
FAM91A1	0.38041	0.38041	3.19041	0.00251882	0.171493	-1.56998
CUL2	0.234336	0.234336	3.18845	0.0025329	0.172023	-1.57478
BRD7P4	0.165881	0.165881	3.18413	0.00256415	0.173501	-1.58532
SNX7	0.140182	0.140182	3.18369	0.00256737	0.173501	-1.5864
RPL12P35	0.212638	0.212638	3.18083	0.00258828	0.174482	-1.59337
SNORD12C	0.364166	0.364166	3.17972	0.00259648	0.174604	-1.59609
RPSAP15	0.259473	0.259473	3.17674	0.00261852	0.174926	-1.60335
RPL21P71	0.202711	0.202711	3.17581	0.00262545	0.174926	-1.60562
RPL35P1	0.224956	0.224956	3.17534	0.00262892	0.174926	-1.60676
POM121	0.216139	0.216139	3.17502	0.00263129	0.174926	-1.60753
THOC7	0.325508	0.325508	3.17463	0.00263419	0.174926	-1.60848
SLC39A4	0.248951	0.248951	3.17325	0.00264456	0.174926	-1.61186
CDC16	0.219734	0.219734	3.17134	0.00265893	0.174926	-1.61651
MRPL18	0.222548	0.222548	3.16985	0.00267013	0.17524	-1.62013
ICE2	0.276768	0.276768	3.15701	0.002769	0.180428	-1.65136
SLC25A13	0.219683	0.219683	3.15323	0.00279874	0.181499	-1.66053
PDCD5P1	0.232996	0.232996	3.15178	0.00281023	0.181813	-1.66405
MRPL52	0.197508	0.197508	3.1499	0.0028252	0.182349	-1.66861
HSP90AB1	0.249895	0.249895	3.149	0.00283234	0.182378	-1.67078
RPS15AP11	0.218626	0.218626	3.1481	0.00283958	0.182415	-1.67297
TMEM69	0.278626	0.278626	3.14209	0.00288811	0.183987	-1.68752
UBA52P5	0.160222	0.160222	3.14179	0.00289058	0.183987	-1.68825
CDC123	0.296266	0.296266	3.14095	0.00289743	0.183987	-1.69029
LAMTOR2	0.180681	0.180681	3.13914	0.00291227	0.183987	-1.69467
RPL7P15	0.276121	0.276121	3.1379	0.00292245	0.183987	-1.69767
MTHFD1	0.291364	0.291364	3.13751	0.00292567	0.183987	-1.69861
UTP4	0.305993	0.305993	3.13717	0.0029285	0.183987	-1.69944
SNORA38	0.250702	0.250702	3.13681	0.00293145	0.183987	-1.70031
MET	0.386188	0.386188	3.13069	0.00298244	0.1864	-1.71511
RPL36AP51	0.264965	0.264965	3.12974	0.00299037	0.1864	-1.71739
INTS8	0.321246	0.321246	3.12827	0.00300278	0.186747	-1.72094
TUBAP2	0.256892	0.256892	3.12683	0.003015	0.18708	-1.72442
GLB1	0.198919	0.198919	3.12487	0.00303164	0.187532	-1.72914
RPSAP18	0.14538	0.14538	3.12395	0.0030395	0.187532	-1.73137
RPL23AP34	0.182321	0.182321	3.12303	0.00304738	0.187532	-1.73359
RPS18P12	0.349027	0.349027	3.12	0.00307348	0.187532	-1.7409
NDE1	0.179117	0.179117	3.1195	0.00307781	0.187532	-1.74211
RPL21P28	0.202809	0.202809	3.11852	0.00308629	0.187532	-1.74447
ALKBH7	0.130405	0.130405	3.11802	0.00309061	0.187532	-1.74567
WDR5B	0.221783	0.221783	3.11798	0.00309096	0.187532	-1.74577
STIP1P3	0.206879	0.206879	3.11315	0.00313321	0.189523	-1.75741
NUDCD3	0.200397	0.200397	3.11092	0.00315281	0.189599	-1.76276
RPL7P25	0.376649	0.376649	3.10866	0.00317292	0.189975	-1.76821
NIF3L1	0.156831	0.156831	3.10784	0.00318021	0.189975	-1.77018
NAA10	0.257472	0.257472	3.10748	0.00318339	0.189975	-1.77104
GATC	0.167691	0.167691	3.1054	0.00320205	0.189975	-1.77605
SNRPGP5	0.201478	0.201478	3.10388	0.00321567	0.189975	-1.77969
RPS15AP5	0.157538	0.157538	3.1038	0.00321641	0.189975	-1.77988
TOP2A	0.468774	0.468774	3.10339	0.00322014	0.189975	-1.78088
NEIL1	0.133803	0.133803	3.10322	0.00322168	0.189975	-1.78129
AHCTF1P1	0.220126	0.220126	3.10245	0.00322865	0.189976	-1.78314
CLDN12	0.431504	0.431504	3.1003	0.00324811	0.19071	-1.78829
MPP6	0.221039	0.221039	3.09942	0.00325617	0.190773	-1.79042
CYCSP55	0.167681	0.167681	3.0982	0.00326731	0.190823	-1.79334
TRMT13	0.223074	0.223074	3.09712	0.00327714	0.190823	-1.79592
PIGF	0.234593	0.234593	3.09389	0.00330695	0.191412	-1.80368
RPL36P16	0.148502	0.148502	3.0929	0.00331612	0.191412	-1.80605
STAU1	0.251355	0.251355	3.09262	0.00331868	0.191412	-1.80671
BMS1	0.209532	0.209532	3.09214	0.00332318	0.191412	-1.80787
LAMTOR5	0.257919	0.257919	3.09125	0.0033315	0.191487	-1.81001
RPL7P47	0.28332	0.28332	3.09045	0.0033389	0.19151	-1.81192
UBL5P2	0.250788	0.250788	3.08779	0.00336379	0.192382	-1.81828
STK3	0.303594	0.303594	3.08733	0.0033682	0.192382	-1.8194
CCT2	0.184235	0.184235	3.08572	0.00338335	0.192844	-1.82325
EBPL	0.234242	0.234242	3.0843	0.00339683	0.193209	-1.82666
SETP14	0.203252	0.203252	3.08332	0.00340607	0.193332	-1.82898
TAB3	0.251746	0.251746	3.08201	0.0034186	0.19364	-1.83213
B4GALT5	0.208025	0.208025	3.07975	0.00344023	0.19417	-1.83753
KDM4A-AS1	0.138606	0.138606	3.07955	0.00344218	0.19417	-1.83801
SSBP1	0.247241	0.247241	3.07797	0.00345737	0.194605	-1.84178
RAC3	0.15428	0.15428	3.07715	0.00346532	0.194605	-1.84375
DGAT2	0.204751	0.204751	3.07653	0.00347127	0.194605	-1.84522
ELFN1-AS1	0.371091	0.371091	3.07248	0.00351071	0.196413	-1.8549
NOL10	0.21372	0.21372	3.07057	0.00352943	0.196592	-1.85945
RPL21P50	0.246801	0.246801	3.07025	0.00353257	0.196592	-1.86021
PSENEN	0.206345	0.206345	3.06847	0.0035502	0.196608	-1.86448
PPA1	0.240659	0.240659	3.06641	0.0035706	0.196837	-1.86938
CKS1BP3	0.325835	0.325835	3.06605	0.00357416	0.196837	-1.87023
DCTPP1	0.193078	0.193078	3.06587	0.00357597	0.196837	-1.87067
GART	0.19817	0.19817	3.06402	0.00359448	0.197142	-1.87509
SDC4	0.221594	0.221594	3.06387	0.00359595	0.197142	-1.87544
F11R	0.239059	0.239059	3.05724	0.00366289	0.200008	-1.89122
DGCR8	0.247325	0.247325	3.0544	0.00369192	0.201191	-1.89798
EEF1DP6	0.147624	0.147624	3.0532	0.00370425	0.201287	-1.90083
HSP90AB3P	0.161533	0.161533	3.05279	0.00370843	0.201287	-1.9018
RPF2	0.354621	0.354621	3.05085	0.00372854	0.201859	-1.90642
APOC1	0.363299	0.363299	3.04973	0.00374018	0.201859	-1.90909
RPL7P1	0.350288	0.350288	3.04702	0.00376838	0.201859	-1.91552
RPL7	0.35645	0.35645	3.04696	0.00376895	0.201859	-1.91565
RPL19P12	0.196769	0.196769	3.04637	0.00377518	0.201859	-1.91706
C12orf45	0.223459	0.223459	3.0458	0.00378112	0.201859	-1.91841
BUD31	0.253174	0.253174	3.04485	0.00379116	0.201859	-1.92067
RPL21P110	0.165602	0.165602	3.04472	0.00379254	0.201859	-1.92099
RFC2	0.210673	0.210673	3.04339	0.00380651	0.201859	-1.92413
SRSF7	0.305262	0.305262	3.04229	0.00381816	0.201947	-1.92674
SNX5	0.282263	0.282263	3.04173	0.00382413	0.201947	-1.92808
PDSS1	0.383116	0.383116	3.03708	0.00387368	0.203684	-1.93909
RPL7P33	0.304564	0.304564	3.03655	0.0038794	0.203684	-1.94035
UBE2T	0.387459	0.387459	3.03264	0.00392165	0.205506	-1.94961
RPS27P5	0.135935	0.135935	3.03059	0.00394398	0.206281	-1.95447
TMEM60	0.219478	0.219478	3.02797	0.00397267	0.206988	-1.96067
RPS2P5	0.276232	0.276232	3.02566	0.00399806	0.207914	-1.96611
RPS15AP38	0.372424	0.372424	3.02252	0.00403294	0.208549	-1.97354
DAZAP1	0.129903	0.129903	3.02195	0.00403932	0.208549	-1.97489
GINS2	0.192586	0.192586	3.02182	0.00404082	0.208549	-1.97521
ADAT2	0.216463	0.216463	3.01977	0.00406371	0.209335	-1.98003
MYC	0.312642	0.312642	3.0163	0.00410289	0.209632	-1.98823
SNX5P1	0.171136	0.171136	3.016	0.00410621	0.209632	-1.98892
LYPLA1	0.268294	0.268294	3.01389	0.00413025	0.209632	-1.99391
RPL30P4	0.383964	0.383964	3.01374	0.00413194	0.209632	-1.99426
PTTG3P	0.156142	0.156142	3.01322	0.00413783	0.209632	-1.99548
MRPL13	0.392794	0.392794	3.01139	0.00415886	0.209632	-1.99981
NDUFB11	0.189593	0.189593	3.01138	0.00415889	0.209632	-1.99982
CCNC	0.153824	0.153824	3.01131	0.00415975	0.209632	-1.99999
TRIM27	0.187184	0.187184	3.01115	0.00416161	0.209632	-2.00037
EIF2S2P3	0.175861	0.175861	3.00876	0.0041891	0.210156	-2.006
SETP22	0.114942	0.114942	3.00794	0.00419853	0.210156	-2.00792
KIF23	0.21262	0.21262	3.00691	0.0042105	0.210156	-2.01035
TMEM41B	0.155129	0.155129	3.00546	0.00422739	0.210614	-2.01377
SYPL1	0.215183	0.215183	3.00394	0.00424506	0.210857	-2.01733
ZP3	0.190844	0.190844	3.0027	0.00425964	0.210857	-2.02026
C1D	0.155013	0.155013	3.00265	0.00426019	0.210857	-2.02037
CBWD3	0.261058	0.261058	3.0024	0.00426317	0.210857	-2.02097
UBE2CP4	0.163788	0.163788	3.00161	0.00427241	0.210932	-2.02282
RALA	0.183048	0.183048	3.00018	0.00428933	0.211385	-2.02619
RPL7P48	0.168298	0.168298	2.99856	0.00430846	0.211945	-2.02999
MRPL22	0.205006	0.205006	2.99535	0.00434669	0.212676	-2.03753
HSPA9	0.272958	0.272958	2.99467	0.00435486	0.212695	-2.03914
NSDHL	0.192868	0.192868	2.99263	0.00437937	0.2133	-2.04393
GET4	0.204992	0.204992	2.99229	0.00438341	0.2133	-2.04472
RPL7P45	0.159146	0.159146	2.9916	0.00439175	0.2133	-2.04634
FBL	0.279928	0.279928	2.99104	0.0043985	0.2133	-2.04765
TOX3	0.257986	0.257986	2.98889	0.00442451	0.213802	-2.05268
DUT	0.204999	0.204999	2.98715	0.00444579	0.214133	-2.05678
RPL10AP5	0.179913	0.179913	2.98692	0.00444855	0.214133	-2.05731
GSTO1	0.210381	0.210381	2.98594	0.00446061	0.214133	-2.05962
GLRX2	0.235266	0.235266	2.985	0.00447213	0.214133	-2.06182
TRA2A	0.200775	0.200775	2.98403	0.00448398	0.214133	-2.06408
CKS1B	0.320555	0.320555	2.98395	0.00448496	0.214133	-2.06426
BCCIP	0.226237	0.226237	2.98248	0.00450317	0.214133	-2.06772
ENY2	0.342648	0.342648	2.9817	0.00451281	0.214133	-2.06955
TMEM126A	0.337106	0.337106	2.98163	0.00451368	0.214133	-2.06971
TMCO6	0.128419	0.128419	2.98131	0.00451755	0.214133	-2.07044
STAMBP	0.203929	0.203929	2.98121	0.0045188	0.214133	-2.07068
RPL23AP75	0.203277	0.203277	2.98068	0.00452548	0.214133	-2.07194
TMEM14C	0.276035	0.276035	2.97828	0.00455527	0.21517	-2.07754
TBC1D4	0.249384	0.249384	2.97717	0.00456918	0.215454	-2.08014
RPL23AP43	0.225892	0.225892	2.97276	0.00462479	0.217325	-2.09046
PPIAP31	0.221705	0.221705	2.97026	0.00465647	0.217821	-2.09628
GINS1	0.246037	0.246037	2.9694	0.00466756	0.217821	-2.09831
CENPM	0.197711	0.197711	2.96916	0.0046706	0.217821	-2.09886
GPALPP1	0.29554	0.29554	2.96857	0.00467817	0.217821	-2.10025
MRPL30P1	0.192115	0.192115	2.96757	0.00469094	0.217821	-2.10257
TGDS	0.351804	0.351804	2.96755	0.00469118	0.217821	-2.10261
CYB5B	0.379988	0.379988	2.96514	0.00472225	0.218507	-2.10824
RPL21P23	0.158221	0.158221	2.96324	0.00474679	0.218891	-2.11266
OR7E10P	0.172869	0.172869	2.96266	0.00475431	0.218891	-2.11401
MAL2	0.54231	0.54231	2.96158	0.00476837	0.218954	-2.11653
GAPDHP61	0.179393	0.179393	2.9603	0.0047852	0.218954	-2.11953
PDIA4	0.215273	0.215273	2.95988	0.00479064	0.218954	-2.1205
ATAD1	0.23092	0.23092	2.95949	0.00479577	0.218954	-2.12142
RNF8	0.302276	0.302276	2.95873	0.00480567	0.219039	-2.12317
RFC4	0.267438	0.267438	2.95658	0.00483398	0.21963	-2.12818
SNORA64	0.197671	0.197671	2.95653	0.00483473	0.21963	-2.12831
GPATCH4	0.213399	0.213399	2.95548	0.00484861	0.219895	-2.13076
MOGS	0.177646	0.177646	2.9532	0.00487881	0.220511	-2.13605
CDKN2A	0.198145	0.198145	2.95138	0.00490316	0.220517	-2.14029
RSL1D1	0.290984	0.290984	2.95021	0.00491889	0.220517	-2.14302
SNRPD2	0.303629	0.303629	2.94804	0.004948	0.220517	-2.14805
RPL7P20	0.246682	0.246682	2.94746	0.00495586	0.220517	-2.1494
CDK2	0.185582	0.185582	2.94709	0.0049608	0.220517	-2.15025
CBR1	0.216106	0.216106	2.94677	0.00496515	0.220517	-2.151
CERS6-AS1	0.248696	0.248696	2.94622	0.00497264	0.220517	-2.15228
CBX3	0.349612	0.349612	2.94569	0.00497982	0.220517	-2.15351
RPS7P10	0.240715	0.240715	2.94542	0.00498348	0.220517	-2.15414
RPSAP54	0.184016	0.184016	2.94364	0.0050078	0.220759	-2.15828
EIF4A2	0.271994	0.271994	2.94211	0.00502863	0.220759	-2.16182
PMS2P1	0.310688	0.310688	2.94177	0.00503328	0.220759	-2.16261
EIF5B	0.211473	0.211473	2.94147	0.00503746	0.220759	-2.16332
HSPE1P10	0.172157	0.172157	2.94012	0.00505604	0.221218	-2.16645
RNPS1	0.24426	0.24426	2.93728	0.00509516	0.221863	-2.17302
RPL35	0.314101	0.314101	2.93534	0.0051222	0.222019	-2.17752
BCL11A	0.2854	0.2854	2.93411	0.00513941	0.222019	-2.18038
CCT7	0.219935	0.219935	2.93224	0.00516553	0.222757	-2.1847
MLEC	0.221733	0.221733	2.93172	0.00517282	0.222757	-2.1859
XRN2	0.270164	0.270164	2.92842	0.00521951	0.2241	-2.19355
NOP56	0.268152	0.268152	2.92836	0.0052204	0.2241	-2.19369
RHPN2	0.195427	0.195427	2.92205	0.00531054	0.226616	-2.20827
SNHG19	0.248559	0.248559	2.92194	0.00531221	0.226616	-2.20854
RPSAP47	0.251569	0.251569	2.92081	0.00532841	0.226916	-2.21113
RPL36AP13	0.220846	0.220846	2.9194	0.00534892	0.226916	-2.2144
PRDX3	0.207713	0.207713	2.91885	0.00535687	0.226916	-2.21566
EEF1E1	0.22685	0.22685	2.91758	0.00537532	0.226916	-2.21859
FAM86FP	0.197431	0.197431	2.91735	0.00537878	0.226916	-2.21913
SLC25A22	0.158907	0.158907	2.91687	0.00538574	0.226916	-2.22024
EIF4EBP1	0.267769	0.267769	2.91166	0.00546235	0.229435	-2.23225
CENPN	0.250045	0.250045	2.90965	0.00549218	0.230162	-2.23689
POLR2F	0.18178	0.18178	2.90936	0.0054965	0.230162	-2.23756
LAPTM4BP1	0.134077	0.134077	2.90795	0.00551746	0.230464	-2.24079
MPV17	0.233091	0.233091	2.90757	0.00552309	0.230464	-2.24166
KDM7A	0.222944	0.222944	2.90586	0.00554871	0.230464	-2.2456
MRPS17	0.205501	0.205501	2.90572	0.00555086	0.230464	-2.24593
POLA1	0.236408	0.236408	2.90484	0.00556411	0.230464	-2.24795
RPS2P55	0.29438	0.29438	2.90033	0.00563232	0.232286	-2.25832
YBX1P6	0.17733	0.17733	2.89885	0.005655	0.232519	-2.26173
GAPDHP71	0.198825	0.198825	2.89758	0.00567437	0.232965	-2.26464
TRMT11	0.19185	0.19185	2.89616	0.00569626	0.233332	-2.26791
BRD7	0.20187	0.20187	2.89498	0.00571443	0.233556	-2.27062
KRT8P14	0.171993	0.171993	2.89309	0.00574356	0.234396	-2.27494
LSM7	0.241032	0.241032	2.89095	0.00577692	0.235405	-2.27987
PNPT1	0.206093	0.206093	2.88971	0.00579627	0.235842	-2.28271
CNOT11	0.175901	0.175901	2.88696	0.00583939	0.23689	-2.28901
PTK2	0.198412	0.198412	2.88306	0.00590113	0.238686	-2.29795
FAM83D	0.238127	0.238127	2.88168	0.00592302	0.239216	-2.30109
SNRPE	0.300254	0.300254	2.87977	0.00595363	0.240089	-2.30547
C4orf46	0.281522	0.281522	2.87916	0.00596337	0.240089	-2.30686
KRT18P53	0.325459	0.325459	2.87849	0.00597415	0.240089	-2.30839
RPL35P3	0.184986	0.184986	2.87622	0.0060108	0.240089	-2.31359
RPL7P8	0.232846	0.232846	2.87597	0.0060148	0.240089	-2.31415
SC5D	0.247573	0.247573	2.87578	0.00601787	0.240089	-2.31459
YTHDF1	0.215904	0.215904	2.87491	0.00603203	0.240089	-2.31658
MAK16	0.177191	0.177191	2.87464	0.0060364	0.240089	-2.3172
NDUFAF2	0.339759	0.339759	2.87353	0.00605451	0.240089	-2.31974
HSPA8P8	0.183281	0.183281	2.87273	0.00606741	0.240089	-2.32155
MCM10	0.193638	0.193638	2.87271	0.00606773	0.240089	-2.3216
RPL23AP3	0.161562	0.161562	2.87261	0.00606938	0.240089	-2.32183
CDH1	0.2766	0.2766	2.87214	0.00607718	0.240089	-2.32292
TIMM9	0.304959	0.304959	2.8717	0.00608434	0.240089	-2.32392
HENMT1	0.293392	0.293392	2.8705	0.00610398	0.240089	-2.32665
RPL21P3	0.188186	0.188186	2.87018	0.0061092	0.240089	-2.32738
MUC13	0.337327	0.337327	2.87003	0.00611176	0.240089	-2.32774
PTGES3P1	0.174472	0.174472	2.86961	0.00611854	0.240089	-2.32868
RPS3AP49	0.234327	0.234327	2.86949	0.0061205	0.240089	-2.32895
RPL12P10	0.154503	0.154503	2.86733	0.00615615	0.240332	-2.33388
CEBPZ	0.252772	0.252772	2.86638	0.00617198	0.240332	-2.33606
PMS2P10	0.27892	0.27892	2.86571	0.00618307	0.240332	-2.33758
BTF3P5	0.212332	0.212332	2.86469	0.00620005	0.240332	-2.33991
MRPL20	0.206207	0.206207	2.8642	0.00620812	0.240332	-2.34102
PPIL6	0.162702	0.162702	2.8641	0.00620978	0.240332	-2.34125
MOSPD3	0.147109	0.147109	2.86354	0.00621912	0.240332	-2.34252
PA2G4P4	0.125946	0.125946	2.86328	0.00622352	0.240332	-2.34312
TSPAN6	0.325588	0.325588	2.86211	0.00624305	0.240745	-2.34578
RPL4P5	0.169587	0.169587	2.85922	0.00629171	0.241508	-2.35237
MRPL55	0.157669	0.157669	2.8591	0.00629375	0.241508	-2.35265
C1GALT1	0.221475	0.221475	2.85883	0.0062982	0.241508	-2.35325
CKLF-CMTM1	0.195698	0.195698	2.85474	0.00636767	0.243171	-2.36256
ZNF451	0.315156	0.315156	2.8547	0.0063683	0.243171	-2.36264
INSIG1	0.148579	0.148579	2.85297	0.00639805	0.243385	-2.36659
RNF139	0.163031	0.163031	2.85258	0.00640463	0.243385	-2.36747
ARL6IP1	0.209368	0.209368	2.85229	0.00640955	0.243385	-2.36812
DBF4	0.179801	0.179801	2.85174	0.00641903	0.243406	-2.36937
ZNF107	0.18693	0.18693	2.85025	0.00644482	0.243807	-2.37277
NMD3	0.226646	0.226646	2.84904	0.00646566	0.243807	-2.37551
RPS12P15	0.137611	0.137611	2.84861	0.00647317	0.243807	-2.3765
BIVM-ERCC5	0.228498	0.228498	2.84822	0.00647989	0.243807	-2.37738
SLC30A6	0.258939	0.258939	2.84803	0.00648319	0.243807	-2.37781
DNMBP	0.272748	0.272748	2.84364	0.00655981	0.245058	-2.38778
ANKRD22	0.34638	0.34638	2.84303	0.00657044	0.245058	-2.38915
TRAV21	0.163836	0.163836	2.84283	0.00657398	0.245058	-2.38961
ZNF138	0.244687	0.244687	2.84239	0.00658176	0.245058	-2.39061
LSMEM1	0.261462	0.261462	2.84149	0.00659753	0.245058	-2.39264
RAD54L	0.18716	0.18716	2.84012	0.00662168	0.245058	-2.39574
LAGE3	0.131007	0.131007	2.83996	0.00662455	0.245058	-2.3961
PYCR1	0.191463	0.191463	2.83918	0.00663846	0.245058	-2.39788
SLC5A3	0.156092	0.156092	2.83914	0.00663918	0.245058	-2.39797
EPSTI1	0.304872	0.304872	2.83792	0.00666077	0.245058	-2.40073
UBE2V1P11	0.260872	0.260872	2.83777	0.00666352	0.245058	-2.40108
MFSD8	0.180513	0.180513	2.83751	0.00666807	0.245058	-2.40166
GID8	0.166101	0.166101	2.83734	0.00667115	0.245058	-2.40205
CCT6P3	0.241548	0.241548	2.83692	0.00667858	0.245058	-2.40299
AMD1	0.281302	0.281302	2.83668	0.00668283	0.245058	-2.40353
PA2G4P3	0.192241	0.192241	2.83654	0.00668535	0.245058	-2.40385
ACTR3B	0.186098	0.186098	2.83645	0.00668699	0.245058	-2.40406
MARCKSL1	0.147385	0.147385	2.83558	0.00670253	0.245298	-2.40603
EXOSC7	0.189241	0.189241	2.83074	0.00678967	0.247785	-2.41698
SMC3	0.347401	0.347401	2.83043	0.00679522	0.247785	-2.41767
PPIAP6	0.124948	0.124948	2.82956	0.00681112	0.247785	-2.41965
PROSER1	0.22747	0.22747	2.82937	0.00681452	0.247785	-2.42007
PPM1G	0.20293	0.20293	2.8293	0.00681587	0.247785	-2.42024
EIF2AK1	0.30304	0.30304	2.82756	0.00684752	0.248409	-2.42417
RPL12P33	0.192201	0.192201	2.8262	0.00687239	0.248409	-2.42724
GNG4	0.498058	0.498058	2.82576	0.00688048	0.248409	-2.42824
RPL7P23	0.216173	0.216173	2.82565	0.00688241	0.248409	-2.42847
FAM136A	0.177675	0.177675	2.82491	0.00689595	0.248409	-2.43014
HSPE1P5	0.168664	0.168664	2.82448	0.00690397	0.248409	-2.43113
DPEP1	0.148054	0.148054	2.82438	0.0069058	0.248409	-2.43135
LMO7	0.24628	0.24628	2.82348	0.00692236	0.248677	-2.43338
FAM83H	0.181695	0.181695	2.82189	0.00695181	0.248738	-2.43698
SPIRE2	0.212964	0.212964	2.82092	0.00696962	0.248738	-2.43914
CKS1BP6	0.198484	0.198484	2.8193	0.00699976	0.248841	-2.4428
SLC25A19	0.167026	0.167026	2.81894	0.00700645	0.248841	-2.44361
CBX3P1	0.156014	0.156014	2.81843	0.00701604	0.248841	-2.44477
UBE2A	0.259371	0.259371	2.81808	0.00702263	0.248841	-2.44556
HSPD1P5	0.153687	0.153687	2.81796	0.00702488	0.248841	-2.44583
SPC25	0.171508	0.171508	2.81783	0.0070272	0.248841	-2.44611
IFRD1	0.222058	0.222058	2.81695	0.00704378	0.249105	-2.44811
HDAC2	0.235873	0.235873	2.81458	0.00708837	0.249505	-2.45345
ZFAND1	0.275004	0.275004	2.8144	0.00709164	0.249505	-2.45385
GTF3A	0.422045	0.422045	2.81368	0.00710526	0.249577	-2.45547
HBS1L	0.278099	0.278099	2.81333	0.00711196	0.249577	-2.45627
HSPD1	0.236599	0.236599	2.81273	0.00712321	0.249651	-2.45761
ASS1P7	0.17379	0.17379	2.81208	0.00713554	0.249762	-2.45907
PXDNL	0.0965971	0.0965971	2.80978	0.00717928	0.250971	-2.46425
TXNP6	0.150876	0.150876	2.80825	0.0072085	0.251495	-2.46769
SYK	0.176625	0.176625	2.80803	0.00721267	0.251495	-2.46818
TERF1	0.303719	0.303719	2.80717	0.00722927	0.251706	-2.47012
UBE2V2	0.288077	0.288077	2.80657	0.0072408	0.251706	-2.47147
NCAPG2	0.180544	0.180544	2.80551	0.00726114	0.251898	-2.47385
SNORD51	0.226617	0.226617	2.80408	0.00728883	0.251967	-2.47707
DDX10	0.203835	0.203835	2.80372	0.00729571	0.251967	-2.47787
FAM53C	0.155134	0.155134	2.8035	0.00730005	0.251967	-2.47837
ACP1	0.279503	0.279503	2.80284	0.00731281	0.251998	-2.47985
PRR5-ARHGAP8	0.218752	0.218752	2.80211	0.00732691	0.251998	-2.48148
FLVCR1	0.220955	0.220955	2.80016	0.00736488	0.251998	-2.48585
ST13P5	0.140836	0.140836	2.80013	0.00736556	0.251998	-2.48593
NEU1	0.204784	0.204784	2.79878	0.00739191	0.252079	-2.48895
KRIT1	0.404359	0.404359	2.79777	0.00741173	0.252079	-2.49122
KIF20B	0.257606	0.257606	2.79773	0.00741262	0.252079	-2.49132
RPL29P11	0.163156	0.163156	2.79738	0.00741936	0.252079	-2.49209
RPLP1	0.233367	0.233367	2.7972	0.00742291	0.252079	-2.4925
TRMT10A	0.160563	0.160563	2.79515	0.00746336	0.25306	-2.49709
FAM32A	0.136432	0.136432	2.79478	0.00747074	0.25306	-2.49793
NOL8	0.269954	0.269954	2.79041	0.00755773	0.255373	-2.50772
LCN8	0.135137	0.135137	2.7894	0.00757793	0.255739	-2.50998
MARS2	0.218547	0.218547	2.78748	0.00761644	0.256099	-2.51427
ITGA6	0.289106	0.289106	2.78678	0.00763066	0.256099	-2.51585
TRAPPC5	0.16586	0.16586	2.78653	0.00763551	0.256099	-2.51639
BOLA2P1	0.160814	0.160814	2.78586	0.00764905	0.256239	-2.51788
RPS24P13	0.184381	0.184381	2.78396	0.00768773	0.256906	-2.52215
SUV39H2	0.245046	0.245046	2.78395	0.00768779	0.256906	-2.52216
TMPO	0.232637	0.232637	2.78286	0.00771	0.257284	-2.5246
RPL6P21	0.119712	0.119712	2.78247	0.00771795	0.257284	-2.52547
RPL12P14	0.163219	0.163219	2.78146	0.00773866	0.257596	-2.52773
YWHAZ	0.300995	0.300995	2.78109	0.00774619	0.257596	-2.52856
ANXA2P3	0.137415	0.137415	2.77889	0.00779131	0.258781	-2.53347
RPS3AP3	0.162941	0.162941	2.77815	0.00780658	0.258807	-2.53512
ATP6V0B	0.247768	0.247768	2.77793	0.00781105	0.258807	-2.53561
DNAJB1	0.343114	0.343114	2.77728	0.00782445	0.258937	-2.53705
CBWD5	0.236255	0.236255	2.7753	0.00786553	0.259982	-2.54148
KRT8P51	0.18412	0.18412	2.77386	0.00789549	0.260656	-2.54469
EEF1B2P1	0.189986	0.189986	2.77265	0.00792062	0.260855	-2.54738
NARS2	0.163071	0.163071	2.77168	0.00794105	0.260972	-2.54956
BANF1P3	0.221955	0.221955	2.77157	0.00794329	0.260972	-2.5498
ZNF780A	0.214201	0.214201	2.76931	0.00799065	0.261927	-2.55482
TUBGCP3	0.167734	0.167734	2.76927	0.00799154	0.261927	-2.55491
RPL12P19	0.167868	0.167868	2.76837	0.00801052	0.262234	-2.55692
ROMO1	0.227299	0.227299	2.76608	0.00805903	0.263235	-2.56202
TRMT112P2	0.120382	0.120382	2.76601	0.00806039	0.263235	-2.56216
BPHL	0.167558	0.167558	2.76523	0.0080771	0.263433	-2.56391
PDZK1IP1	0.31631	0.31631	2.76463	0.00808989	0.263433	-2.56525
RPL21P131	0.216921	0.216921	2.76437	0.00809539	0.263433	-2.56582
DDX28	0.149282	0.149282	2.76294	0.00812579	0.264108	-2.56899
PMS2P4	0.12846	0.12846	2.75898	0.00821095	0.266287	-2.5778
PHF6	0.206048	0.206048	2.75879	0.00821505	0.266287	-2.57822
COPS7B	0.160386	0.160386	2.75735	0.00824629	0.266754	-2.58142
DEK	0.215469	0.215469	2.75652	0.00826427	0.267019	-2.58326
CHAD	0.152048	0.152048	2.75596	0.00827654	0.267099	-2.58451
MKLN1-AS	0.204804	0.204804	2.75504	0.00829652	0.267129	-2.58655
CMC1	0.299682	0.299682	2.75402	0.00831885	0.267129	-2.58882
SIM2	0.351745	0.351745	2.75375	0.00832458	0.267129	-2.5894
ERLIN2	0.207701	0.207701	2.75287	0.00834384	0.267129	-2.59135
AGFG1	0.216339	0.216339	2.75287	0.00834397	0.267129	-2.59137
COPS7A	0.156095	0.156095	2.75278	0.00834594	0.267129	-2.59157
IARS2	0.218455	0.218455	2.75189	0.00836548	0.267207	-2.59354
NOP16	0.265025	0.265025	2.75134	0.0083774	0.267207	-2.59474
DUS4L	0.205251	0.205251	2.75049	0.00839626	0.267207	-2.59664
SAC3D1	0.104072	0.104072	2.75007	0.00840559	0.267207	-2.59758
XPO4	0.246551	0.246551	2.74893	0.00843071	0.267207	-2.6001
PLK4	0.294165	0.294165	2.74854	0.00843922	0.267207	-2.60095
SLC29A1	0.218034	0.218034	2.74798	0.00845179	0.267207	-2.6022
ESD	0.30403	0.30403	2.74787	0.0084542	0.267207	-2.60245
SPTLC1	0.186307	0.186307	2.74757	0.00846076	0.267207	-2.6031
CCNB1	0.214324	0.214324	2.74752	0.00846187	0.267207	-2.60321
GNG5P1	0.139212	0.139212	2.7467	0.00848021	0.267207	-2.60504
FUCA2	0.122492	0.122492	2.74645	0.00848572	0.267207	-2.60559
RPL23AP89	0.187001	0.187001	2.74499	0.0085182	0.267207	-2.60881
DDX27	0.28805	0.28805	2.74453	0.00852856	0.267207	-2.60984
NSUN2	0.211372	0.211372	2.74403	0.00853979	0.267207	-2.61095
MMACHC	0.19913	0.19913	2.74383	0.00854413	0.267207	-2.61138
PABPC3	0.186462	0.186462	2.7397	0.00863727	0.269788	-2.62053
GLRX3	0.306766	0.306766	2.73929	0.00864641	0.269788	-2.62142
UBE3D	0.156687	0.156687	2.73841	0.0086665	0.270106	-2.62338
CCNB2	0.257447	0.257447	2.73483	0.00874798	0.272024	-2.63127
GFM2	0.222041	0.222041	2.73325	0.00878431	0.272843	-2.63477
CUL4A	0.187489	0.187489	2.7301	0.00885695	0.274394	-2.64171
RPS3AP12	0.128689	0.128689	2.72978	0.00886439	0.274394	-2.64242
ACLY	0.20391	0.20391	2.72876	0.00888809	0.274505	-2.64467
TMEM33	0.291064	0.291064	2.72758	0.00891538	0.275037	-2.64726
CDC25B	0.19577	0.19577	2.72652	0.0089401	0.275488	-2.64959
TARBP1	0.202196	0.202196	2.72265	0.00903095	0.277661	-2.65811
KIF9	0.309504	0.309504	2.72153	0.00905748	0.278164	-2.66059
EHMT2	0.131876	0.131876	2.71943	0.00910726	0.278634	-2.66521
BAIAP2L1	0.325962	0.325962	2.71877	0.00912283	0.278634	-2.66665
TBCA	0.370842	0.370842	2.71873	0.00912382	0.278634	-2.66674
FOXD2	0.147766	0.147766	2.71799	0.0091414	0.278859	-2.66836
PPAT	0.212655	0.212655	2.7164	0.00917937	0.279705	-2.67185
VPS29	0.212393	0.212393	2.71467	0.00922092	0.280029	-2.67566
EMD	0.174227	0.174227	2.71381	0.0092417	0.280029	-2.67756
RMI2	0.166092	0.166092	2.71348	0.00924947	0.280029	-2.67826
TCP1P1	0.155494	0.155494	2.71318	0.00925672	0.280029	-2.67892
SNORD36A	0.290195	0.290195	2.71274	0.00926738	0.280029	-2.67989
KRT18P57	0.148717	0.148717	2.71255	0.00927207	0.280029	-2.68032
MLST8	0.135768	0.135768	2.71181	0.00928987	0.280147	-2.68194
GMPS	0.210768	0.210768	2.71154	0.00929651	0.280147	-2.68254
MRPL57	0.174174	0.174174	2.70782	0.00938685	0.281422	-2.69068
MRPL39	0.206497	0.206497	2.70771	0.00938962	0.281422	-2.69093
TPD52L1	0.251464	0.251464	2.70726	0.00940054	0.281422	-2.69191
RP9	0.152791	0.152791	2.70726	0.00940065	0.281422	-2.69192
PPME1	0.180517	0.180517	2.70639	0.00942178	0.281745	-2.69381
RBAK-RBAKDN	0.168888	0.168888	2.70401	0.00948035	0.282154	-2.69903
RPL26P30	0.178075	0.178075	2.70385	0.00948427	0.282154	-2.69938
RPL10A	0.224183	0.224183	2.70286	0.0095089	0.282494	-2.70156
C1QTNF3-AMACR	0.285263	0.285263	2.69897	0.00960548	0.283819	-2.71007
MALSU1	0.22372	0.22372	2.69833	0.00962145	0.283984	-2.71147
METAP2	0.162256	0.162256	2.69665	0.00966342	0.284495	-2.71513
BBS10	0.154853	0.154853	2.69648	0.00966779	0.284495	-2.71552
EIF4HP1	0.14263	0.14263	2.69597	0.00968059	0.284495	-2.71663
LRPPRC	0.197318	0.197318	2.69556	0.00969086	0.284495	-2.71752
NABP2	0.19336	0.19336	2.69474	0.00971149	0.284794	-2.71931
VRK2	0.253736	0.253736	2.69351	0.00974247	0.28538	-2.72199
MAGT1	0.232886	0.232886	2.69312	0.00975238	0.28538	-2.72285
MMP9	0.193866	0.193866	2.69169	0.00978854	0.285825	-2.72596
NUDT5	0.197454	0.197454	2.68986	0.00983511	0.286878	-2.72996
USP7	0.246645	0.246645	2.68895	0.00985834	0.287249	-2.73194
GAS5	0.294808	0.294808	2.68788	0.00988569	0.287739	-2.73427
LBR	0.133512	0.133512	2.68671	0.00991588	0.288043	-2.73684
FNBP4	0.180964	0.180964	2.68624	0.00992779	0.288043	-2.73785
CENPF	0.21878	0.21878	2.68565	0.00994309	0.28811	-2.73914
ARL6IP1P3	0.116115	0.116115	2.68494	0.0099613	0.28811	-2.74068
DHFR	0.261192	0.261192	2.68492	0.00996177	0.28811	-2.74072
TYSND1	0.191586	0.191586	2.68377	0.00999169	0.28867	-2.74325
PPP1CC	0.224786	0.224786	2.68244	0.0100262	0.288875	-2.74614
PTGES2-AS1	0.138573	0.138573	2.68241	0.0100267	0.288875	-2.74619
EIF3C	0.27398	0.27398	2.68227	0.0100305	0.288875	-2.74651
POLR3G	0.327466	0.327466	2.68139	0.0100534	0.289228	-2.74842
CENPW	0.228055	0.228055	2.67809	0.0101396	0.290337	-2.75561
EPHA8	0.140022	0.140022	2.67702	0.0101678	0.290337	-2.75794
MTHFD2	0.198419	0.198419	2.67625	0.0101879	0.290337	-2.7596
RABGEF1	0.168262	0.168262	2.67585	0.0101985	0.290337	-2.76048
HACD2	0.376587	0.376587	2.67565	0.0102037	0.290337	-2.76091
DEPDC7	0.329577	0.329577	2.67506	0.0102192	0.290337	-2.76218
MRPL30	0.202812	0.202812	2.67485	0.010225	0.290337	-2.76265
NCSTN	0.18654	0.18654	2.67478	0.0102266	0.290337	-2.76279
CELSR2	0.136733	0.136733	2.67476	0.0102272	0.290337	-2.76284
CHEK1	0.19749	0.19749	2.67425	0.0102408	0.290337	-2.76395
RPL37P15	0.213452	0.213452	2.67053	0.0103397	0.292229	-2.77203
TEX264	0.125513	0.125513	2.66905	0.0103791	0.292558	-2.77523
TXN	0.444407	0.444407	2.6688	0.0103858	0.292558	-2.77577
HOOK1	0.263104	0.263104	2.66854	0.0103928	0.292558	-2.77634
RPL29P2	0.123825	0.123825	2.66849	0.0103942	0.292558	-2.77645
MYBBP1A	0.141768	0.141768	2.66783	0.010412	0.292758	-2.77789
KRT18P17	0.169312	0.169312	2.66718	0.0104293	0.29292	-2.77929
ZNF830	0.226984	0.226984	2.66541	0.0104772	0.293685	-2.78314
AKR1A1	0.243619	0.243619	2.66387	0.0105187	0.294373	-2.78646
WNT7B	0.159876	0.159876	2.6637	0.0105233	0.294373	-2.78683
SLBP	0.266498	0.266498	2.66214	0.0105659	0.294776	-2.79022
KIAA1804	0.153915	0.153915	2.66178	0.0105758	0.294776	-2.791
POLB	0.267917	0.267917	2.66118	0.0105921	0.294776	-2.7923
POLR3A	0.146669	0.146669	2.66081	0.0106021	0.294776	-2.7931
COMMD6	0.45591	0.45591	2.66053	0.0106098	0.294776	-2.79371
RPIA	0.217104	0.217104	2.66048	0.010611	0.294776	-2.7938
RPSAP39	0.14546	0.14546	2.6604	0.0106133	0.294776	-2.79398
RPL23AP61	0.206921	0.206921	2.65942	0.0106401	0.29492	-2.7961
RRP15	0.153533	0.153533	2.65881	0.0106568	0.295082	-2.79741
SRSF2	0.211819	0.211819	2.65603	0.0107334	0.296005	-2.80343
XIAP	0.220347	0.220347	2.65503	0.010761	0.296465	-2.80559
CD47	0.320423	0.320423	2.65453	0.0107751	0.296554	-2.80669
SNORD46	0.309271	0.309271	2.65389	0.0107926	0.296737	-2.80805
RAD18	0.26118	0.26118	2.65347	0.0108045	0.296764	-2.80897
SFR1	0.198027	0.198027	2.65298	0.0108181	0.296841	-2.81003
UTP18	0.273564	0.273564	2.65243	0.0108334	0.296961	-2.81122
WDR43	0.225039	0.225039	2.65041	0.0108899	0.297911	-2.81558
GNL2	0.187265	0.187265	2.64892	0.0109316	0.298344	-2.81879
AHSA1	0.249945	0.249945	2.64865	0.0109391	0.298344	-2.81937
PPIAP9	0.126551	0.126551	2.64811	0.0109544	0.298344	-2.82054
MRPS31	0.179549	0.179549	2.6479	0.0109603	0.298344	-2.821
XPO1	0.250368	0.250368	2.64446	0.0110575	0.300004	-2.8284
USP2-AS1	0.176609	0.176609	2.64419	0.0110652	0.300004	-2.82899
LGALSL	0.204843	0.204843	2.64414	0.0110667	0.300004	-2.82911
DBI	0.222319	0.222319	2.64367	0.01108	0.300004	-2.83011
SNRPEP5	0.144316	0.144316	2.64357	0.0110829	0.300004	-2.83034
TECRP1	0.162968	0.162968	2.64341	0.0110872	0.300004	-2.83066
LAPTM4B	0.236651	0.236651	2.64046	0.0111718	0.300198	-2.83703
COX7A2	0.267342	0.267342	2.64038	0.011174	0.300198	-2.8372
RPL14	0.258726	0.258726	2.64028	0.0111767	0.300198	-2.83741
RPS3AP29	0.189934	0.189934	2.64023	0.0111781	0.300198	-2.83751
GLIS3-AS1	0.143318	0.143318	2.63992	0.0111871	0.300198	-2.83819
TAF2	0.276398	0.276398	2.63992	0.0111871	0.300198	-2.83819
RPS7P1	0.313656	0.313656	2.6397	0.0111934	0.300198	-2.83866
PPP1R14B	0.202744	0.202744	2.63911	0.0112105	0.300362	-2.83994
GEMIN8	0.165417	0.165417	2.63639	0.0112889	0.301649	-2.84579
CSTF3	0.168067	0.168067	2.63613	0.0112964	0.301649	-2.84634
CCNT1	0.281428	0.281428	2.63591	0.0113027	0.301649	-2.84681
DPY30	0.214819	0.214819	2.63505	0.0113278	0.302023	-2.84867
PDCD5	0.328335	0.328335	2.63433	0.0113487	0.302286	-2.85022
CBWD1	0.330015	0.330015	2.63189	0.0114197	0.302845	-2.85545
MTRF1	0.174703	0.174703	2.63188	0.0114202	0.302845	-2.85548
PABPC1P7	0.149876	0.149876	2.63184	0.0114212	0.302845	-2.85556
MMP12	0.421611	0.421611	2.63147	0.0114321	0.302845	-2.85636
TBC1D31	0.171246	0.171246	2.63145	0.0114326	0.302845	-2.85639
RPL35P4	0.136652	0.136652	2.63113	0.0114421	0.302845	-2.85709
SFPQ	0.197154	0.197154	2.63095	0.0114474	0.302845	-2.85748
RPSAP10	0.111234	0.111234	2.6304	0.0114634	0.302974	-2.85865
RPL36AP26	0.262017	0.262017	2.62863	0.0115153	0.303611	-2.86244
CENPQ	0.212062	0.212062	2.62861	0.0115162	0.303611	-2.8625
CPSF3	0.185105	0.185105	2.62775	0.0115414	0.303611	-2.86434
SNRPEP3	0.165291	0.165291	2.62767	0.0115437	0.303611	-2.8645
PCNA	0.265409	0.265409	2.62699	0.0115638	0.303611	-2.86596
KRTAP29-1	0.152341	0.152341	2.62624	0.011586	0.303611	-2.86757
RPS6P25	0.184789	0.184789	2.62624	0.0115862	0.303611	-2.86759
DSG2	0.19782	0.19782	2.62606	0.0115913	0.303611	-2.86796
HIBCH	0.239508	0.239508	2.6258	0.0115991	0.303611	-2.86852
PLP2	0.286404	0.286404	2.62473	0.0116309	0.303611	-2.87081
EMC8	0.189518	0.189518	2.62469	0.011632	0.303611	-2.87089
REEP1	0.245124	0.245124	2.62469	0.011632	0.303611	-2.87089
RPL39	0.297114	0.297114	2.62357	0.0116654	0.303611	-2.87329
RPL7P4	0.152257	0.152257	2.62319	0.0116768	0.303618	-2.87411
CUL1	0.21736	0.21736	2.62243	0.0116995	0.3037	-2.87575
SMYD5	0.141335	0.141335	2.62182	0.0117177	0.3037	-2.87705
RPL7P36	0.142375	0.142375	2.62087	0.0117462	0.3037	-2.87908
NONO	0.161167	0.161167	2.62014	0.011768	0.303964	-2.88064
DCLRE1A	0.182125	0.182125	2.61885	0.0118069	0.304608	-2.8834
SUGT1P1	0.113524	0.113524	2.61821	0.0118264	0.304608	-2.88479
GTSE1	0.16513	0.16513	2.61771	0.0118415	0.304709	-2.88585
LMTK2	0.177509	0.177509	2.61451	0.0119385	0.306627	-2.89269
GIPC2	0.250375	0.250375	2.61268	0.0119943	0.307588	-2.8966
GABRE	0.316915	0.316915	2.61247	0.0120007	0.307588	-2.89705
TOX4	0.162642	0.162642	2.61218	0.0120097	0.307588	-2.89767
PRC1	0.227042	0.227042	2.6116	0.0120274	0.307752	-2.8989
RLIM	0.171006	0.171006	2.61118	0.0120404	0.307796	-2.89981
RPS16	0.25072	0.25072	2.60944	0.012094	0.308276	-2.90353
USP12	0.212021	0.212021	2.60886	0.0121117	0.308276	-2.90476
ZDHHC4	0.218711	0.218711	2.60881	0.0121134	0.308276	-2.90487
RPS4XP11	0.201298	0.201298	2.60674	0.0121772	0.30898	-2.90927
RPS2P7	0.114847	0.114847	2.60545	0.0122174	0.30948	-2.91203
BTBD6	0.123351	0.123351	2.60504	0.0122302	0.30948	-2.91291
SNORA78	0.168432	0.168432	2.60501	0.0122309	0.30948	-2.91296
SGTA	0.135027	0.135027	2.60434	0.0122521	0.309604	-2.91441
SNORA5A	0.203639	0.203639	2.60381	0.0122686	0.309604	-2.91554
KRT18P16	0.206755	0.206755	2.60334	0.0122832	0.309604	-2.91653
EIF4H	0.210696	0.210696	2.60282	0.0122994	0.309604	-2.91763
ASS1P1	0.148084	0.148084	2.60268	0.0123039	0.309604	-2.91794
RAE1	0.209087	0.209087	2.60178	0.0123319	0.310024	-2.91984
FUBP1	0.190368	0.190368	2.59991	0.0123907	0.31079	-2.92382
OR10Q2P	0.150639	0.150639	2.59959	0.0124008	0.31079	-2.9245
CKAP2L	0.247383	0.247383	2.59829	0.012442	0.31079	-2.92728
RPS20P1	0.137146	0.137146	2.59805	0.0124496	0.31079	-2.9278
RPL39P18	0.194143	0.194143	2.5979	0.0124543	0.31079	-2.92811
E2F5	0.192868	0.192868	2.59787	0.0124552	0.31079	-2.92817
RPSAP61	0.230222	0.230222	2.59757	0.0124648	0.31079	-2.92882
MGST2	0.257086	0.257086	2.59511	0.0125429	0.312022	-2.93404
DPH6	0.13692	0.13692	2.59496	0.0125477	0.312022	-2.93436
NDUFB6	0.233165	0.233165	2.59493	0.0125485	0.312022	-2.93442
ISCA1P1	0.193859	0.193859	2.59325	0.0126022	0.31225	-2.93799
ZHX1-C8orf76	0.223379	0.223379	2.59324	0.0126028	0.31225	-2.93802
CDKL3	0.160377	0.160377	2.59322	0.0126034	0.31225	-2.93807
MITD1	0.169712	0.169712	2.59194	0.0126444	0.312789	-2.94078
MRTO4	0.168873	0.168873	2.59154	0.012657	0.312789	-2.94162
ORC3	0.193265	0.193265	2.59141	0.0126612	0.312789	-2.9419
RPS19BP1	0.127078	0.127078	2.59089	0.0126779	0.312789	-2.943
GRPEL1	0.178402	0.178402	2.59075	0.0126825	0.312789	-2.9433
STAG3L2	0.140982	0.140982	2.58926	0.0127306	0.313021	-2.94647
SPRY4	0.148023	0.148023	2.58904	0.0127376	0.313021	-2.94693
TNS4	0.232609	0.232609	2.58904	0.0127377	0.313021	-2.94694
RPS7P8	0.181778	0.181778	2.58809	0.0127686	0.313303	-2.94896
RPL15P3	0.191649	0.191649	2.58635	0.0128248	0.314265	-2.95263
TMEM161B-AS1	0.130176	0.130176	2.58606	0.0128344	0.314265	-2.95326
SORT1	0.243626	0.243626	2.58497	0.0128699	0.314365	-2.95557
PWP1	0.189931	0.189931	2.58365	0.0129129	0.314365	-2.95836
TFAP2C	0.139575	0.139575	2.58364	0.0129135	0.314365	-2.95839
RNF114	0.187174	0.187174	2.58282	0.0129404	0.314365	-2.96013
RPUSD4	0.140553	0.140553	2.5817	0.012977	0.314365	-2.9625
PUSL1	0.131651	0.131651	2.58157	0.0129812	0.314365	-2.96277
RPP38	0.173738	0.173738	2.58137	0.0129878	0.314365	-2.9632
SLC41A3	0.117418	0.117418	2.58089	0.0130037	0.314365	-2.96422
HSPD1P8	0.110003	0.110003	2.5805	0.0130163	0.314365	-2.96503
ESCO2	0.2075	0.2075	2.58	0.013033	0.314365	-2.9661
RPL18	0.220263	0.220263	2.57905	0.0130643	0.314365	-2.9681
TMEM243	0.247756	0.247756	2.57878	0.0130731	0.314365	-2.96867
RPL7AP8	0.126773	0.126773	2.57868	0.0130767	0.314365	-2.9689
STRBP	0.265219	0.265219	2.57865	0.0130775	0.314365	-2.96895
SLC25A39	0.112049	0.112049	2.57809	0.0130962	0.314365	-2.97014
SLC4A1AP	0.12391	0.12391	2.57772	0.0131084	0.314365	-2.97092
TYW5	0.112698	0.112698	2.57753	0.0131149	0.314365	-2.97133
PAX2	0.159089	0.159089	2.5742	0.0132258	0.316468	-2.97837
OXSR1	0.172353	0.172353	2.5727	0.0132759	0.316628	-2.98153
VDAC1P4	0.142195	0.142195	2.57254	0.0132814	0.316628	-2.98188
CCNF	0.142845	0.142845	2.57252	0.0132819	0.316628	-2.98191
PTCD1	0.169577	0.169577	2.57187	0.0133037	0.316628	-2.98328
PIBF1	0.282762	0.282762	2.57184	0.0133047	0.316628	-2.98334
SNRPD2P1	0.145242	0.145242	2.57158	0.0133136	0.316628	-2.9839
RMDN1	0.201405	0.201405	2.57003	0.0133658	0.317592	-2.98717
CBWD2	0.199463	0.199463	2.56938	0.0133877	0.317772	-2.98854
KCTD20	0.145249	0.145249	2.56912	0.0133966	0.317772	-2.9891
GTF2F2	0.255598	0.255598	2.56877	0.0134083	0.317773	-2.98983
RPL12P1	0.151125	0.151125	2.56793	0.013437	0.31794	-2.99161
NPM1P21	0.141727	0.141727	2.56776	0.0134426	0.31794	-2.99196
RPS13P2	0.224165	0.224165	2.56753	0.0134503	0.31794	-2.99244
FDX1P1	0.142279	0.142279	2.56689	0.0134721	0.318008	-2.99379
NPM1P8	0.129018	0.129018	2.56665	0.0134802	0.318008	-2.99429
AKAP11	0.168324	0.168324	2.56504	0.0135352	0.318726	-2.99769
LRIF1	0.219554	0.219554	2.5645	0.0135536	0.318726	-2.99883
DFFB	0.130595	0.130595	2.56241	0.0136253	0.319975	-3.00324
FAM122B	0.209591	0.209591	2.56203	0.0136384	0.319975	-3.00404
HOXA13	0.215692	0.215692	2.56193	0.0136419	0.319975	-3.00425
OLA1	0.305757	0.305757	2.55853	0.0137593	0.321981	-3.01141
DPY19L1P2	0.151272	0.151272	2.55788	0.0137817	0.322147	-3.01276
SMYD3	0.139986	0.139986	2.5571	0.0138091	0.322474	-3.01442
SLC11A2	0.307251	0.307251	2.5568	0.0138193	0.322474	-3.01504
RPS23P2	0.197726	0.197726	2.5559	0.0138509	0.322935	-3.01694
CSNK2A2	0.222223	0.222223	2.55346	0.0139361	0.32456	-3.02206
EIF3H	0.282037	0.282037	2.55307	0.0139498	0.32456	-3.02289
CHMP4C	0.253018	0.253018	2.55289	0.0139563	0.32456	-3.02327
DARS2	0.190804	0.190804	2.55065	0.014035	0.326114	-3.02797
RPL23AP57	0.229499	0.229499	2.54894	0.0140955	0.327077	-3.03155
TRIM24	0.256441	0.256441	2.5488	0.0141004	0.327077	-3.03185
STMN1	0.284872	0.284872	2.5462	0.0141929	0.328396	-3.0373
UPB1	0.142855	0.142855	2.5447	0.0142464	0.329343	-3.04044
SRP72	0.189941	0.189941	2.54405	0.0142698	0.329411	-3.0418
MRPL48	0.246449	0.246449	2.54336	0.0142945	0.329411	-3.04325
PMPCB	0.191891	0.191891	2.5432	0.0143001	0.329411	-3.04358
NEIL3	0.138682	0.138682	2.54318	0.0143009	0.329411	-3.04362
RSRC1	0.199773	0.199773	2.54234	0.0143313	0.329411	-3.04539
RPS4XP6	0.156203	0.156203	2.5423	0.0143327	0.329411	-3.04547
ALG8	0.261776	0.261776	2.54227	0.0143338	0.329411	-3.04554
BRIX1	0.249689	0.249689	2.54048	0.0143982	0.330613	-3.04927
APOO	0.227214	0.227214	2.53995	0.0144175	0.330778	-3.05039
GJB3	0.17756	0.17756	2.53923	0.0144433	0.331093	-3.05189
ACAD10	0.173795	0.173795	2.53863	0.0144652	0.331316	-3.05315
TM2D3	0.222466	0.222466	2.53797	0.0144893	0.331542	-3.05454
HSPE1P23	0.133278	0.133278	2.53743	0.0145087	0.331542	-3.05565
RPL12P8	0.11866	0.11866	2.5372	0.0145172	0.331542	-3.05614
HBP1	0.275267	0.275267	2.53702	0.0145236	0.331542	-3.05651
PATL1	0.190162	0.190162	2.53584	0.0145669	0.332117	-3.05899
RPSAP11	0.172026	0.172026	2.53561	0.0145751	0.332117	-3.05946
BRIP1	0.150764	0.150764	2.53339	0.0146567	0.333464	-3.06411
ACER2	0.149964	0.149964	2.53288	0.0146751	0.333576	-3.06516
CRIPT	0.276004	0.276004	2.53259	0.014686	0.333576	-3.06578
SSRP1	0.197515	0.197515	2.53136	0.0147314	0.333853	-3.06835
CPPED1	0.122276	0.122276	2.53111	0.0147404	0.333853	-3.06886
SEC61G	0.346299	0.346299	2.53093	0.0147471	0.333853	-3.06924
SNORD3A	0.182996	0.182996	2.53015	0.0147761	0.333877	-3.07087
TRUB1	0.133656	0.133656	2.52972	0.0147918	0.333877	-3.07176
NIFK	0.230171	0.230171	2.52967	0.0147938	0.333877	-3.07187
DPM2	0.164613	0.164613	2.52958	0.0147972	0.333877	-3.07206
RPL29P24	0.145647	0.145647	2.52913	0.0148137	0.333877	-3.07299
SUN5	0.123496	0.123496	2.52877	0.0148272	0.333877	-3.07375
EEF1A1P19	0.179504	0.179504	2.52837	0.0148421	0.333877	-3.07459
PAIP2	0.183454	0.183454	2.52799	0.0148559	0.333877	-3.07536
PCBD1	0.192915	0.192915	2.52756	0.0148721	0.333877	-3.07627
MTURN	0.163749	0.163749	2.52742	0.0148773	0.333877	-3.07656
USP6NL	0.184145	0.184145	2.52727	0.0148828	0.333877	-3.07687
RPL7P7	0.194045	0.194045	2.52685	0.0148986	0.333958	-3.07775
ATG3	0.165395	0.165395	2.52566	0.0149428	0.334439	-3.08022
NIPAL2	0.319499	0.319499	2.52562	0.0149446	0.334439	-3.08032
SNRPC	0.15444	0.15444	2.52462	0.0149818	0.334653	-3.0824
WBP4	0.180803	0.180803	2.52389	0.0150091	0.334653	-3.08391
RPL23AP31	0.222126	0.222126	2.52373	0.0150154	0.334653	-3.08426
SHANK2	0.155934	0.155934	2.5232	0.015035	0.334817	-3.08535
CHAMP1	0.171144	0.171144	2.5221	0.0150765	0.334878	-3.08764
HSPE1P4	0.177102	0.177102	2.52191	0.0150835	0.334878	-3.08803
NDUFA2	0.212694	0.212694	2.52183	0.0150868	0.334878	-3.08821
SPRYD7	0.184799	0.184799	2.51916	0.0151876	0.335347	-3.09376
PPIAL4F	0.170654	0.170654	2.51855	0.0152108	0.335347	-3.09503
RPL7P11	0.11874	0.11874	2.51851	0.0152124	0.335347	-3.09511
RPL31P35	0.210403	0.210403	2.51823	0.0152229	0.335347	-3.09569
HMGB1P26	0.138889	0.138889	2.51797	0.0152327	0.335347	-3.09623
SNORD20	0.255424	0.255424	2.51783	0.0152383	0.335347	-3.09653
ZFAS1	0.14664	0.14664	2.51779	0.0152397	0.335347	-3.09661
RPL17P41	0.127773	0.127773	2.51762	0.0152462	0.335347	-3.09696
SNORA44	0.211091	0.211091	2.51751	0.0152502	0.335347	-3.09718
RPSAP46	0.150256	0.150256	2.51706	0.0152676	0.335347	-3.09813
PRELID1	0.271263	0.271263	2.51706	0.0152676	0.335347	-3.09813
PUS7	0.225854	0.225854	2.51625	0.0152982	0.335749	-3.0998
CDH3	0.183462	0.183462	2.51583	0.0153144	0.335835	-3.10068
ERBB3	0.221282	0.221282	2.5151	0.0153425	0.336005	-3.10221
HADHAP1	0.111936	0.111936	2.51498	0.0153468	0.336005	-3.10244
RPSAP12	0.172411	0.172411	2.51429	0.0153733	0.336315	-3.10387
DHCR7	0.23457	0.23457	2.51341	0.0154073	0.336736	-3.10572
CCDC59	0.295637	0.295637	2.51315	0.0154172	0.336736	-3.10625
ATXN7L3B	0.137096	0.137096	2.51183	0.0154682	0.337164	-3.109
RPL36A-HNRNPH2	0.255251	0.255251	2.51168	0.0154738	0.337164	-3.1093
ASS1P9	0.182589	0.182589	2.51133	0.0154875	0.337192	-3.11003
RPL23AP59	0.167247	0.167247	2.51097	0.0155014	0.337226	-3.11078
CDC40	0.244875	0.244875	2.50769	0.0156286	0.339302	-3.11758
CSTF1	0.243138	0.243138	2.50754	0.0156341	0.339302	-3.11788
RPL12P32	0.117652	0.117652	2.50687	0.0156605	0.339605	-3.11928
NPM3	0.144233	0.144233	2.50469	0.0157456	0.341179	-3.12379
DCUN1D5	0.139713	0.139713	2.50365	0.0157864	0.341577	-3.12594
SNORD104	0.2384	0.2384	2.50315	0.0158059	0.341577	-3.12697
RPL23AP86	0.190213	0.190213	2.50306	0.0158097	0.341577	-3.12717
HAUS6P1	0.148647	0.148647	2.50295	0.015814	0.341577	-3.12739
FAM200A	0.135915	0.135915	2.50215	0.0158453	0.34179	-3.12904
TSPAN17	0.148154	0.148154	2.50206	0.0158489	0.34179	-3.12923
PA2G4P2	0.174346	0.174346	2.50153	0.0158701	0.341977	-3.13034
MRPL45P2	0.155748	0.155748	2.5008	0.0158986	0.342276	-3.13183
SLIRP	0.347687	0.347687	2.50018	0.0159233	0.342276	-3.13312
ITGA2	0.250649	0.250649	2.49908	0.015967	0.342276	-3.1354
SNRPA	0.12656	0.12656	2.49807	0.0160073	0.342276	-3.1375
MCCC2	0.149908	0.149908	2.49761	0.0160254	0.342276	-3.13844
DGAT1	0.261094	0.261094	2.49704	0.0160481	0.342276	-3.13962
URAHP	0.11187	0.11187	2.49664	0.0160642	0.342276	-3.14045
ARL8B	0.208766	0.208766	2.49654	0.016068	0.342276	-3.14064
RPS27AP3	0.16666	0.16666	2.49646	0.0160712	0.342276	-3.14081
SLC22A3	0.300837	0.300837	2.49544	0.016112	0.342276	-3.14292
PDIA6	0.220021	0.220021	2.49515	0.0161236	0.342276	-3.14352
RAN	0.229595	0.229595	2.49463	0.0161446	0.342276	-3.1446
FABP5P2	0.163052	0.163052	2.49429	0.0161582	0.342276	-3.1453
MRPS15	0.261886	0.261886	2.49421	0.0161613	0.342276	-3.14546
LRRC37A11P	0.130895	0.130895	2.49397	0.0161708	0.342276	-3.14595
DNAI1	0.117522	0.117522	2.49379	0.0161782	0.342276	-3.14633
PREB	0.144214	0.144214	2.49362	0.0161848	0.342276	-3.14667
RPL23AP37	0.221813	0.221813	2.49298	0.0162106	0.342551	-3.14799
PPIA	0.254489	0.254489	2.49256	0.0162276	0.342551	-3.14886
ACSL5	0.268698	0.268698	2.49237	0.0162355	0.342551	-3.14927
DDX19B	0.164007	0.164007	2.49077	0.0163	0.343174	-3.15256
TSEN15	0.13352	0.13352	2.49063	0.0163055	0.343174	-3.15284
XCL1	0.13409	0.13409	2.49039	0.0163153	0.343174	-3.15334
RPRD1B	0.123635	0.123635	2.48779	0.0164207	0.344596	-3.1587
R3HDM1	0.223084	0.223084	2.48649	0.0164737	0.345176	-3.16137
LETMD1	0.223826	0.223826	2.48611	0.0164893	0.345239	-3.16216
RIPK2	0.14622	0.14622	2.48343	0.0165992	0.347272	-3.16767
FAM86JP	0.193438	0.193438	2.48303	0.0166156	0.34735	-3.1685
PDZD8	0.210965	0.210965	2.48202	0.0166571	0.347357	-3.17057
KDM1A	0.189399	0.189399	2.48169	0.0166707	0.347357	-3.17125
ZFAND2A	0.172811	0.172811	2.48163	0.0166734	0.347357	-3.17138
ZNF12	0.211373	0.211373	2.48148	0.0166795	0.347357	-3.17169
RPL7L1P11	0.141849	0.141849	2.48037	0.0167255	0.347369	-3.17397
RPS4XP1	0.198589	0.198589	2.47954	0.0167598	0.347369	-3.17567
YARS2	0.166266	0.166266	2.47947	0.0167628	0.347369	-3.17582
SCML1	0.284501	0.284501	2.47924	0.0167721	0.347369	-3.17629
STK39	0.239304	0.239304	2.4791	0.0167783	0.347369	-3.17659
DHTKD1	0.142611	0.142611	2.47909	0.0167786	0.347369	-3.1766
CACUL1	0.139562	0.139562	2.47901	0.0167819	0.347369	-3.17677
MED4	0.22306	0.22306	2.4784	0.0168074	0.347633	-3.17803
HSPE1P28	0.16926	0.16926	2.4774	0.0168487	0.348011	-3.18007
CRNKL1	0.221523	0.221523	2.47704	0.0168639	0.348011	-3.18082
OR7E109P	0.149684	0.149684	2.47526	0.0169382	0.349016	-3.18446
PROX1	0.268638	0.268638	2.47469	0.0169621	0.349244	-3.18563
RPL23AP25	0.212867	0.212867	2.47433	0.0169772	0.349294	-3.18638
KIF20A	0.179965	0.179965	2.47315	0.0170268	0.349785	-3.18879
RNF128	0.30173	0.30173	2.47249	0.0170544	0.350004	-3.19014
MAGOH	0.249032	0.249032	2.47046	0.0171403	0.350713	-3.19431
RPL23AP58	0.1669	0.1669	2.47031	0.0171466	0.350713	-3.19462
RPL9P3	0.16765	0.16765	2.47026	0.017149	0.350713	-3.19473
KRT8P22	0.123352	0.123352	2.46927	0.0171907	0.351097	-3.19675
MIS18A	0.181324	0.181324	2.46913	0.0171967	0.351097	-3.19704
LSG1	0.232066	0.232066	2.4689	0.0172063	0.351097	-3.1975
ABHD13	0.156923	0.156923	2.46742	0.0172697	0.351863	-3.20055
POLE2	0.21274	0.21274	2.46543	0.0173546	0.352413	-3.20462
SPRYD4	0.0983858	0.0983858	2.46533	0.0173585	0.352413	-3.20481
TMEM238	0.145791	0.145791	2.46527	0.0173612	0.352413	-3.20494
TAF1A-AS1	0.133977	0.133977	2.46448	0.0173953	0.352844	-3.20657
ACOT6	0.136263	0.136263	2.46381	0.0174239	0.353041	-3.20793
RPF2P1	0.129252	0.129252	2.46362	0.0174321	0.353041	-3.20832
NUP93	0.125302	0.125302	2.4629	0.0174631	0.353041	-3.20979
ZFYVE16	0.147777	0.147777	2.46274	0.0174697	0.353041	-3.21011
DOCK9	0.167124	0.167124	2.46145	0.0175254	0.353903	-3.21274
ASS1P4	0.155103	0.155103	2.46099	0.0175457	0.353966	-3.2137
CENPK	0.194542	0.194542	2.4607	0.0175581	0.353966	-3.21429
PRKAG1	0.22751	0.22751	2.45919	0.0176233	0.354832	-3.21737
SLC3A2	0.113661	0.113661	2.45832	0.0176612	0.355017	-3.21915
COPZ1	0.203168	0.203168	2.4575	0.0176971	0.355017	-3.22083
SNRPEP2	0.253109	0.253109	2.45743	0.0177002	0.355017	-3.22097
CAPZA1	0.179168	0.179168	2.45689	0.0177235	0.355017	-3.22207
NPAS2	0.196793	0.196793	2.45626	0.0177511	0.355159	-3.22336
LPAR2	0.161939	0.161939	2.45602	0.0177613	0.355159	-3.22384
RPL5P8	0.141848	0.141848	2.45559	0.0177802	0.355159	-3.22472
HNRNPA1P6	0.207775	0.207775	2.45554	0.0177827	0.355159	-3.22483
RPS18	0.228423	0.228423	2.4552	0.0177976	0.355198	-3.22553
IFT172	0.13783	0.13783	2.45318	0.0178859	0.355211	-3.22963
PIK3R1	0.232791	0.232791	2.45318	0.0178862	0.355211	-3.22964
RPS4XP21	0.162055	0.162055	2.45315	0.0178872	0.355211	-3.22969
PCID2	0.140004	0.140004	2.45256	0.0179134	0.355211	-3.2309
NPM1P45	0.126313	0.126313	2.45207	0.017935	0.355211	-3.2319
RPSA	0.261203	0.261203	2.45206	0.0179355	0.355211	-3.23192
CETN2	0.152667	0.152667	2.4516	0.0179558	0.355211	-3.23286
SSB	0.37445	0.37445	2.45152	0.0179594	0.355211	-3.23303
MGME1	0.158794	0.158794	2.45127	0.0179704	0.355211	-3.23354
GH2	0.137573	0.137573	2.45103	0.017981	0.355211	-3.23402
PHF20	0.230747	0.230747	2.45075	0.0179934	0.355211	-3.2346
TMA16	0.156437	0.156437	2.4503	0.0180132	0.355343	-3.23551
SEC11A	0.153393	0.153393	2.44998	0.0180274	0.355368	-3.23616
STEAP1B	0.151718	0.151718	2.44914	0.0180647	0.355847	-3.23788
UBLCP1	0.278315	0.278315	2.44863	0.0180871	0.356031	-3.2389
TIPIN	0.161469	0.161469	2.44822	0.0181054	0.356133	-3.23974
FIS1	0.190716	0.190716	2.4476	0.0181329	0.356193	-3.24099
RPL39P6	0.212313	0.212313	2.44697	0.0181613	0.356298	-3.24229
SYNCRIP	0.196049	0.196049	2.44668	0.0181739	0.356298	-3.24287
OSGIN2	0.242243	0.242243	2.44613	0.0181987	0.356298	-3.244
CDPF1	0.104771	0.104771	2.44611	0.0181994	0.356298	-3.24403
PSMB4	0.191834	0.191834	2.44599	0.0182051	0.356298	-3.24429
RHEB	0.111215	0.111215	2.44548	0.0182275	0.356375	-3.24531
AK4P6	0.119075	0.119075	2.4449	0.0182538	0.356375	-3.2465
KNOP1	0.143492	0.143492	2.44458	0.018268	0.356375	-3.24715
MTIF3	0.235002	0.235002	2.44445	0.018274	0.356375	-3.24742
SEPHS1	0.162364	0.162364	2.44438	0.0182771	0.356375	-3.24756
CYP4F8	0.154414	0.154414	2.44415	0.0182874	0.356375	-3.24802
CMSS1	0.130733	0.130733	2.44313	0.0183332	0.357014	-3.2501
CENPO	0.184092	0.184092	2.44068	0.0184438	0.357837	-3.25508
AGMAT	0.218212	0.218212	2.44001	0.0184741	0.357837	-3.25644
NDUFA5	0.185488	0.185488	2.43977	0.018485	0.357837	-3.25693
PHIP	0.107044	0.107044	2.43963	0.0184912	0.357837	-3.2572
OR7E94P	0.123872	0.123872	2.43958	0.0184935	0.357837	-3.2573
NAA50	0.17654	0.17654	2.43827	0.018553	0.35837	-3.25997
KLHL23	0.217443	0.217443	2.4381	0.0185608	0.35837	-3.26032
SPACA6	0.159992	0.159992	2.4378	0.0185745	0.35837	-3.26093
TIGD1	0.125942	0.125942	2.43703	0.0186093	0.35837	-3.26247
DNAJC19	0.231474	0.231474	2.43671	0.0186239	0.35837	-3.26313
S100P	0.272612	0.272612	2.43598	0.0186575	0.358472	-3.26462
GPAT4	0.110377	0.110377	2.43387	0.0187539	0.359255	-3.26888
RPSAP58	0.180999	0.180999	2.43365	0.0187641	0.359255	-3.26934
E2F1	0.166246	0.166246	2.43313	0.0187881	0.359277	-3.27039
HACD3	0.174118	0.174118	2.43305	0.0187916	0.359277	-3.27055
NCOA6	0.241638	0.241638	2.4311	0.0188817	0.360447	-3.27451
RPL23AP97	0.137603	0.137603	2.43107	0.0188828	0.360447	-3.27455
RPL35AP33	0.208015	0.208015	2.43087	0.0188924	0.360447	-3.27497
PAK1	0.117735	0.117735	2.43018	0.0189239	0.360526	-3.27635
ZNHIT1	0.211591	0.211591	2.43012	0.0189269	0.360526	-3.27649
HNRNPA0	0.153731	0.153731	2.42992	0.0189362	0.360526	-3.27689
RPL35AP32	0.128563	0.128563	2.42895	0.0189813	0.360686	-3.27886
AIMP2	0.145617	0.145617	2.42871	0.0189925	0.360686	-3.27935
CDC25C	0.195005	0.195005	2.4286	0.0189974	0.360686	-3.27956
MKRN1	0.202272	0.202272	2.4255	0.0191419	0.362465	-3.28583
RPL26L1	0.222423	0.222423	2.42511	0.01916	0.362465	-3.28661
HAX1	0.138886	0.138886	2.42465	0.0191815	0.362465	-3.28754
BIRC5	0.106011	0.106011	2.42404	0.01921	0.362465	-3.28877
RPL13P	0.132672	0.132672	2.42363	0.0192295	0.362465	-3.28961
BET1	0.217954	0.217954	2.42358	0.0192318	0.362465	-3.28971
BOP1	0.114028	0.114028	2.42293	0.0192625	0.362465	-3.29103
ARPC5L	0.180263	0.180263	2.4229	0.0192637	0.362465	-3.29107
RAC1	0.18721	0.18721	2.42202	0.0193052	0.362971	-3.29285
RPS15AP9	0.157817	0.157817	2.42177	0.0193171	0.362971	-3.29337
RPS3AP54	0.138659	0.138659	2.42088	0.0193592	0.36351	-3.29516
SEC23B	0.134438	0.134438	2.41889	0.0194532	0.364278	-3.29917
PRDX1	0.25108	0.25108	2.41886	0.0194549	0.364278	-3.29924
URI1	0.266011	0.266011	2.41884	0.0194555	0.364278	-3.29927
ANKRD16	0.132348	0.132348	2.41779	0.0195055	0.364753	-3.30139
GGA2	0.158466	0.158466	2.41735	0.0195266	0.364853	-3.30229
HSPA8P7	0.131695	0.131695	2.41709	0.019539	0.364853	-3.30281
DNAJB1P1	0.128039	0.128039	2.41619	0.0195816	0.364853	-3.30461
MARVELD2	0.201283	0.201283	2.41605	0.0195883	0.364853	-3.30489
CWC22	0.148217	0.148217	2.41568	0.0196061	0.364853	-3.30565
TEX10	0.207709	0.207709	2.41559	0.0196104	0.364853	-3.30582
SNORD13	0.137773	0.137773	2.41517	0.0196307	0.364853	-3.30668
HYOU1	0.252061	0.252061	2.41516	0.0196312	0.364853	-3.3067
CCT4	0.247415	0.247415	2.41249	0.0197591	0.366592	-3.31207
TAGLN2P1	0.147534	0.147534	2.41206	0.0197797	0.366592	-3.31293
RPL23AP16	0.103356	0.103356	2.41192	0.0197867	0.366592	-3.31322
RBM22	0.205275	0.205275	2.41125	0.0198187	0.366592	-3.31456
RPS3AP47	0.204372	0.204372	2.41059	0.0198507	0.366936	-3.31589
WDR5	0.131027	0.131027	2.40938	0.0199095	0.367507	-3.31834
TRMT10C	0.201026	0.201026	2.40877	0.0199387	0.367507	-3.31955
RPL14P1	0.212625	0.212625	2.40848	0.0199529	0.367507	-3.32014
SLC25A52	0.174282	0.174282	2.40838	0.0199578	0.367507	-3.32034
EIF3J	0.259585	0.259585	2.40838	0.019958	0.367507	-3.32035
RPS7	0.185124	0.185124	2.40817	0.0199678	0.367507	-3.32075
GMPSP1	0.201254	0.201254	2.40801	0.0199758	0.367507	-3.32108
NOL11	0.18549	0.18549	2.40684	0.0200326	0.367965	-3.32343
TIMM8BP1	0.171607	0.171607	2.40619	0.0200643	0.367965	-3.32474
UQCRHL	0.232643	0.232643	2.40598	0.0200746	0.367965	-3.32516
DNAJC19P9	0.24758	0.24758	2.40517	0.0201142	0.367965	-3.32679
CCNJ	0.165081	0.165081	2.40487	0.0201291	0.367965	-3.3274
MAPK4	0.14158	0.14158	2.40413	0.0201654	0.368265	-3.32889
RPS4Y1	0.475842	0.475842	2.40325	0.0202083	0.368802	-3.33064
NCAPG	0.183544	0.183544	2.40271	0.0202348	0.368876	-3.33173
BIVM	0.19804	0.19804	2.40261	0.0202399	0.368876	-3.33193
NDUFAB1	0.208367	0.208367	2.40234	0.0202529	0.368876	-3.33246
SERINC3	0.22912	0.22912	2.40143	0.0202978	0.368988	-3.33429
NOL9	0.193993	0.193993	2.40112	0.0203131	0.368988	-3.33491
HMGB1P5	0.198065	0.198065	2.40048	0.0203448	0.369317	-3.3362
E2F3	0.170439	0.170439	2.39962	0.0203871	0.369478	-3.33792
SPIDR	0.180569	0.180569	2.39948	0.0203943	0.369478	-3.3382
TUBA1B	0.258384	0.258384	2.39798	0.0204686	0.370101	-3.34121
SLC25A3	0.173677	0.173677	2.3977	0.0204826	0.370101	-3.34177
XRCC6	0.137851	0.137851	2.39732	0.0205014	0.370101	-3.34253
SLC16A1-AS1	0.199587	0.199587	2.39629	0.0205526	0.370101	-3.34459
MAPRE1	0.152509	0.152509	2.39628	0.0205535	0.370101	-3.34463
SNORD41	0.342249	0.342249	2.39614	0.0205602	0.370101	-3.34489
NUP35	0.188849	0.188849	2.396	0.0205671	0.370101	-3.34517
SNRPG	0.299378	0.299378	2.39597	0.0205688	0.370101	-3.34524
OR7E105P	0.122402	0.122402	2.39517	0.0206086	0.370101	-3.34683
EEF1B2P3	0.239671	0.239671	2.39466	0.0206342	0.370101	-3.34786
LGALS8	0.150257	0.150257	2.39451	0.0206416	0.370101	-3.34816
DCAF15	0.14562	0.14562	2.39434	0.0206501	0.370101	-3.34849
CLSPN	0.197381	0.197381	2.39419	0.0206579	0.370101	-3.34881
MSMO1	0.2306	0.2306	2.39266	0.0207348	0.370877	-3.35187
RGMB	0.198229	0.198229	2.39259	0.0207382	0.370877	-3.35201
POM121C	0.251439	0.251439	2.39249	0.0207431	0.370877	-3.35221
CCNL1	0.161385	0.161385	2.39199	0.0207681	0.370893	-3.3532
JADE3	0.133793	0.133793	2.39193	0.0207712	0.370893	-3.35332
LHFPL4	0.140112	0.140112	2.39075	0.0208306	0.371468	-3.35568
MTHFD2L	0.151677	0.151677	2.39025	0.0208559	0.371637	-3.35668
SPTLC2	0.257949	0.257949	2.38976	0.0208809	0.371637	-3.35767
ALDH4A1	0.159879	0.159879	2.3894	0.0208992	0.371719	-3.35839
TUBA4A	0.192394	0.192394	2.38819	0.0209601	0.372561	-3.36079
POLD3	0.160027	0.160027	2.38766	0.020987	0.372796	-3.36185
MYB	0.296905	0.296905	2.38592	0.0210756	0.373512	-3.36532
METTL18	0.17631	0.17631	2.38582	0.0210809	0.373512	-3.36553
SNRPEP4	0.198201	0.198201	2.3858	0.021082	0.373512	-3.36558
POP1	0.115575	0.115575	2.38357	0.0211961	0.375289	-3.37002
INSIG2	0.137287	0.137287	2.38313	0.0212185	0.375443	-3.3709
MED1	0.189606	0.189606	2.38271	0.0212399	0.375491	-3.37173
RPS24P7	0.163426	0.163426	2.38226	0.0212631	0.375501	-3.37263
DPP9-AS1	0.135854	0.135854	2.38151	0.0213016	0.375559	-3.37412
ATP6V0C	0.20804	0.20804	2.38137	0.0213093	0.375559	-3.37442
NAA20	0.192934	0.192934	2.38135	0.0213099	0.375559	-3.37444
NELFA	0.149573	0.149573	2.38099	0.0213285	0.375559	-3.37516
VPS28	0.128677	0.128677	2.3806	0.0213489	0.375559	-3.37595
PAPOLA	0.296579	0.296579	2.37973	0.0213939	0.375853	-3.37768
MIPEPP3	0.134358	0.134358	2.37921	0.0214207	0.375853	-3.37872
PALB2	0.186247	0.186247	2.37817	0.0214746	0.376315	-3.38079
DCUN1D4	0.173172	0.173172	2.37738	0.0215154	0.376788	-3.38235
STT3B	0.264062	0.264062	2.3757	0.0216027	0.377273	-3.38569
RBBP4P4	0.137018	0.137018	2.37543	0.0216171	0.377273	-3.38624
FCF1P7	0.0954807	0.0954807	2.37526	0.021626	0.377273	-3.38658
NAT10	0.142805	0.142805	2.37427	0.0216774	0.377687	-3.38853
DCLRE1B	0.143479	0.143479	2.37344	0.0217212	0.377969	-3.3902
RPL12P50	0.23533	0.23533	2.37317	0.0217354	0.377974	-3.39074
SLC25A36	0.210909	0.210909	2.37278	0.0217556	0.378085	-3.3915
RPL12P47	0.186408	0.186408	2.37243	0.0217742	0.378168	-3.39221
MRPL50	0.212464	0.212464	2.37196	0.0217987	0.378271	-3.39313
SRP68	0.132211	0.132211	2.37179	0.0218079	0.378271	-3.39348
ERICH2	0.214117	0.214117	2.37017	0.0218928	0.379281	-3.39668
RPL39P3	0.306963	0.306963	2.37015	0.0218939	0.379281	-3.39672
LDHAP2	0.12133	0.12133	2.36954	0.0219261	0.379418	-3.39793
SMAD5	0.211106	0.211106	2.36948	0.0219296	0.379418	-3.39806
PGAM1	0.175889	0.175889	2.36881	0.021965	0.379573	-3.39939
SNRPGP15	0.180553	0.180553	2.36871	0.0219704	0.379573	-3.3996
WDR36	0.155351	0.155351	2.36851	0.0219808	0.379573	-3.39999
YWHAB	0.199622	0.199622	2.36821	0.0219966	0.379573	-3.40058
PPP4C	0.138142	0.138142	2.368	0.022008	0.379573	-3.40101
FARSB	0.236485	0.236485	2.36683	0.02207	0.380402	-3.40332
PSMD11	0.143257	0.143257	2.36561	0.0221347	0.381275	-3.40573
ARHGAP22	0.134181	0.134181	2.3649	0.0221727	0.381689	-3.40714
RPL19P13	0.139097	0.139097	2.3644	0.0221992	0.381904	-3.40813
SMKR1	0.152609	0.152609	2.36186	0.0223357	0.383287	-3.41317
RPL8P2	0.134661	0.134661	2.36048	0.02241	0.383717	-3.41591
SLC4A1APP1	0.131275	0.131275	2.35906	0.0224866	0.384426	-3.41872
GAPDHP1	0.180827	0.180827	2.35804	0.0225415	0.385124	-3.42072
NDUFA5P11	0.147024	0.147024	2.35727	0.0225837	0.3856	-3.42226
TOMM20P4	0.131932	0.131932	2.35627	0.0226379	0.385875	-3.42423
SMIM15	0.181636	0.181636	2.35617	0.0226429	0.385875	-3.42442
RER1	0.161097	0.161097	2.35593	0.0226561	0.385875	-3.4249
RPL36P4	0.142855	0.142855	2.35475	0.0227205	0.386623	-3.42723
IQCK	0.177797	0.177797	2.35461	0.0227284	0.386623	-3.42752
RPSAP4	0.163171	0.163171	2.35431	0.0227446	0.386658	-3.4281
EIF3M	0.233159	0.233159	2.35359	0.0227839	0.387086	-3.42953
LCLAT1	0.291438	0.291438	2.35317	0.0228071	0.387239	-3.43036
CKAP5	0.140281	0.140281	2.35215	0.0228627	0.387941	-3.43236
TMX2	0.209658	0.209658	2.35173	0.022886	0.388096	-3.4332
RAB33B	0.152774	0.152774	2.35089	0.0229319	0.388632	-3.43485
EEF1GP3	0.149461	0.149461	2.34866	0.0230548	0.388793	-3.43925
UBE2V1P9	0.141453	0.141453	2.34855	0.0230609	0.388793	-3.43947
VN1R108P	0.15179	0.15179	2.34843	0.0230675	0.388793	-3.4397
RPGRIP1L	0.205137	0.205137	2.34831	0.0230745	0.388793	-3.43995
ADNP	0.227051	0.227051	2.34817	0.0230821	0.388793	-3.44022
NFKBIE	0.113991	0.113991	2.348	0.0230914	0.388793	-3.44055
DLEU1	0.174718	0.174718	2.34768	0.0231093	0.388793	-3.44119
ZCCHC14	0.0991321	0.0991321	2.34753	0.0231173	0.388793	-3.44147
PDK3	0.153369	0.153369	2.3474	0.0231248	0.388793	-3.44174
S100A11	0.30932	0.30932	2.34737	0.0231265	0.388793	-3.4418
ARMC4P1	0.152611	0.152611	2.345	0.0232583	0.390297	-3.44647
RPL36A	0.284298	0.284298	2.34489	0.0232641	0.390297	-3.44668
PSME2P2	0.135377	0.135377	2.34473	0.0232732	0.390297	-3.447
RPS3AP33	0.172088	0.172088	2.34364	0.023334	0.391077	-3.44914
EEF1GP1	0.143342	0.143342	2.34327	0.0233547	0.391184	-3.44987
IL17RE	0.120124	0.120124	2.34227	0.0234109	0.391555	-3.45185
RAC1P2	0.211656	0.211656	2.34211	0.0234199	0.391555	-3.45216
RASL11A	0.119751	0.119751	2.34005	0.0235357	0.39207	-3.45622
KRT8	0.115602	0.115602	2.33999	0.023539	0.39207	-3.45633
UBE2WP1	0.124197	0.124197	2.33904	0.0235924	0.39207	-3.4582
RPL12P17	0.138684	0.138684	2.33887	0.0236019	0.39207	-3.45853
HSD17B1P1	0.110646	0.110646	2.33877	0.0236077	0.39207	-3.45873
ZKSCAN1	0.235968	0.235968	2.33868	0.0236127	0.39207	-3.4589
UBE2B	0.179243	0.179243	2.33845	0.0236259	0.39207	-3.45936
RPL7P32	0.216438	0.216438	2.33799	0.0236517	0.39207	-3.46026
STARD4	0.160827	0.160827	2.33614	0.0237564	0.393396	-3.46389
HDGF	0.122553	0.122553	2.33492	0.0238258	0.393775	-3.46628
NPM1	0.204727	0.204727	2.33475	0.0238357	0.393775	-3.46662
RPL12P25	0.150181	0.150181	2.33465	0.0238411	0.393775	-3.46681
LPCAT2	0.178126	0.178126	2.33422	0.0238656	0.39394	-3.46765
RBM12B-AS1	0.142252	0.142252	2.33368	0.0238965	0.394084	-3.46872
COX6C	0.307696	0.307696	2.33357	0.0239031	0.394084	-3.46895
TBL1YP1	0.102339	0.102339	2.33262	0.0239573	0.394203	-3.47081
GDI2	0.129458	0.129458	2.3322	0.023981	0.394203	-3.47162
PAQR4	0.124683	0.124683	2.33199	0.0239934	0.394203	-3.47204
CHCHD3P3	0.156196	0.156196	2.33013	0.0240998	0.394559	-3.47567
RPL27	0.254626	0.254626	2.32996	0.0241099	0.394559	-3.47602
MRPS33	0.169076	0.169076	2.32979	0.0241198	0.394559	-3.47636
SMARCD2	0.177906	0.177906	2.32946	0.0241385	0.394628	-3.47699
UCK2	0.231252	0.231252	2.32904	0.0241627	0.394787	-3.47781
RPL23AP27	0.133627	0.133627	2.32822	0.0242101	0.395326	-3.47943
RPS24	0.174924	0.174924	2.32738	0.0242584	0.395641	-3.48106
LDHB	0.33286	0.33286	2.32582	0.0243492	0.396181	-3.48413
ANXA3	0.172622	0.172622	2.32544	0.0243711	0.396181	-3.48486
DDX52	0.214903	0.214903	2.32531	0.0243786	0.396181	-3.48512
RPL7AP60	0.155308	0.155308	2.32392	0.0244594	0.397187	-3.48783
RPL7P59	0.23161	0.23161	2.3236	0.0244781	0.397187	-3.48846
RPS24P8	0.179106	0.179106	2.32326	0.0244978	0.397187	-3.48912
GSPT1	0.136293	0.136293	2.32288	0.0245204	0.397282	-3.48988
PRELID3BP3	0.148031	0.148031	2.32265	0.0245336	0.397282	-3.49032
CCDC183	0.129445	0.129445	2.32217	0.0245616	0.3975	-3.49126
VBP1	0.257368	0.257368	2.32136	0.024609	0.397826	-3.49284
OSBPL2	0.1801	0.1801	2.32133	0.0246109	0.397826	-3.4929
RPS23	0.295676	0.295676	2.32103	0.0246287	0.397877	-3.49349
S100PBP	0.120664	0.120664	2.31968	0.0247081	0.398804	-3.49613
SUMO2P4	0.1352	0.1352	2.31955	0.0247153	0.398804	-3.49637
BCAP31P1	0.0945712	0.0945712	2.31839	0.0247841	0.399122	-3.49865
CACNA1D	0.12229	0.12229	2.31786	0.0248149	0.399122	-3.49967
SUB1	0.303403	0.303403	2.31781	0.024818	0.399122	-3.49978
KCNE3	0.142518	0.142518	2.31745	0.0248396	0.399122	-3.50049
PPIAP14	0.104578	0.104578	2.31737	0.0248444	0.399122	-3.50065
UQCC1	0.186355	0.186355	2.31648	0.0248966	0.399122	-3.50237
SLC25A32	0.171333	0.171333	2.31609	0.0249201	0.399122	-3.50314
SASS6	0.250721	0.250721	2.31602	0.0249237	0.399122	-3.50326
FAM210A	0.176971	0.176971	2.316	0.024925	0.399122	-3.5033
ORC2	0.108111	0.108111	2.31531	0.024966	0.399122	-3.50465
ZNF92	0.130484	0.130484	2.31503	0.0249828	0.399122	-3.50521
FAM217B	0.167013	0.167013	2.31445	0.025017	0.399122	-3.50633
SH3BP1	0.109815	0.109815	2.31427	0.0250281	0.399122	-3.50669
OR10B1P	0.110534	0.110534	2.31417	0.0250338	0.399122	-3.50688
FTH1P11	0.148634	0.148634	2.31395	0.0250469	0.399122	-3.50731
PAICS	0.200488	0.200488	2.31373	0.0250601	0.399122	-3.50774
PHB	0.147845	0.147845	2.31363	0.0250662	0.399122	-3.50794
RPL7P26	0.123964	0.123964	2.31352	0.0250728	0.399122	-3.50815
MEI1	0.112746	0.112746	2.31338	0.0250807	0.399122	-3.50841
APH1A	0.178676	0.178676	2.31329	0.0250863	0.399122	-3.5086
NAA15	0.195397	0.195397	2.3123	0.0251452	0.399368	-3.51052
MRPL51	0.219815	0.219815	2.31104	0.0252207	0.400045	-3.51297
PBDC1	0.1515	0.1515	2.31086	0.0252318	0.400045	-3.51334
SPPL2C	0.0994666	0.0994666	2.31033	0.0252632	0.400311	-3.51436
RANBP1	0.244178	0.244178	2.30949	0.0253139	0.400407	-3.516
MCMBP	0.163322	0.163322	2.30918	0.0253323	0.400407	-3.5166
SFT2D2	0.176129	0.176129	2.30901	0.0253426	0.400407	-3.51693
RPL13AP3	0.187418	0.187418	2.30799	0.0254043	0.400886	-3.51892
MCM8	0.141813	0.141813	2.30778	0.025417	0.400886	-3.51933
PHBP1	0.141147	0.141147	2.30741	0.0254393	0.401007	-3.52005
EBNA1BP2	0.167694	0.167694	2.30635	0.0255033	0.401551	-3.52211
RPL29	0.214705	0.214705	2.30439	0.025622	0.403188	-3.52591
PPP1R1B	0.171811	0.171811	2.30374	0.0256612	0.403262	-3.52717
C1orf112	0.190235	0.190235	2.30367	0.0256655	0.403262	-3.5273
CDK7	0.26643	0.26643	2.30358	0.025671	0.403262	-3.52748
ZSWIM3	0.118637	0.118637	2.30294	0.0257102	0.403646	-3.52873
CIZ1	0.158075	0.158075	2.30249	0.0257377	0.40371	-3.5296
NPIPB4	0.325974	0.325974	2.30145	0.0258013	0.404147	-3.53163
RPL21P106	0.109111	0.109111	2.30085	0.0258381	0.40449	-3.53279
SNORD78	0.206134	0.206134	2.30032	0.0258702	0.404762	-3.53381
PLEKHH3	0.10893	0.10893	2.29992	0.0258951	0.40478	-3.5346
C9orf116	0.18607	0.18607	2.29934	0.0259306	0.40478	-3.53572
SCNM1	0.108613	0.108613	2.29933	0.0259307	0.40478	-3.53572
UQCRB	0.328478	0.328478	2.29894	0.0259549	0.404904	-3.53649
TSACC	0.191555	0.191555	2.29872	0.0259683	0.404904	-3.53691
NDUFA6	0.236226	0.236226	2.29839	0.0259886	0.404989	-3.53755
ANO6	0.194743	0.194743	2.29686	0.0260829	0.405109	-3.54052
APEX1	0.161162	0.161162	2.29656	0.0261018	0.405109	-3.54111
RPL7P44	0.125518	0.125518	2.29551	0.0261663	0.405109	-3.54313
MDK	0.174095	0.174095	2.2953	0.0261792	0.405109	-3.54354
ARHGAP11B	0.188239	0.188239	2.29514	0.0261896	0.405109	-3.54386
SNAP47	0.124091	0.124091	2.2951	0.0261922	0.405109	-3.54394
CACNG4	0.102499	0.102499	2.29504	0.0261956	0.405109	-3.54405
METTL2B	0.152669	0.152669	2.29496	0.0262004	0.405109	-3.5442
RPL32P34	0.117391	0.117391	2.29449	0.0262294	0.405109	-3.54511
HNRNPR	0.190914	0.190914	2.29447	0.0262309	0.405109	-3.54515
WWP1P1	0.163538	0.163538	2.29444	0.026233	0.405109	-3.54522
ZNF574	0.116782	0.116782	2.29389	0.026267	0.405109	-3.54628
HMGN5	0.199597	0.199597	2.29389	0.026267	0.405109	-3.54628
SCLY	0.100579	0.100579	2.29349	0.0262921	0.405109	-3.54706
SBDSP1	0.192234	0.192234	2.29346	0.026294	0.405109	-3.54712
BMS1P12	0.168073	0.168073	2.29344	0.0262951	0.405109	-3.54715
TMF1	0.141635	0.141635	2.29323	0.0263079	0.405109	-3.54755
NF1P8	0.0970612	0.0970612	2.29277	0.0263366	0.405197	-3.54844
DPCD	0.130308	0.130308	2.29266	0.0263433	0.405197	-3.54865
YKT6	0.150091	0.150091	2.29152	0.0264146	0.406066	-3.55086
CHD1L	0.202461	0.202461	2.29088	0.0264548	0.406284	-3.55211
UBQLN1	0.1403	0.1403	2.29082	0.0264586	0.406284	-3.55222
ATRAID	0.21244	0.21244	2.29036	0.026487	0.406303	-3.5531
SMIM12	0.127648	0.127648	2.28921	0.0265592	0.406699	-3.55533
CDK5RAP1	0.141432	0.141432	2.28896	0.026575	0.406699	-3.55582
KIAA1614-AS1	0.132057	0.132057	2.28837	0.0266119	0.407036	-3.55695
NELFCD	0.124909	0.124909	2.28715	0.0266884	0.407725	-3.5593
RPL23AP65	0.24987	0.24987	2.28694	0.0267018	0.407725	-3.55971
CDC14B	0.205048	0.205048	2.28582	0.0267723	0.408352	-3.56187
ARL6IP6	0.176114	0.176114	2.28554	0.0267904	0.408352	-3.56242
RPS23P8	0.32914	0.32914	2.28551	0.0267924	0.408352	-3.56248
SRM	0.157414	0.157414	2.2849	0.0268307	0.408442	-3.56365
PSMD6	0.176224	0.176224	2.28449	0.026857	0.408442	-3.56445
PPIF	0.162317	0.162317	2.28431	0.0268684	0.408442	-3.5648
DUSP18	0.183534	0.183534	2.28398	0.0268888	0.408524	-3.56542
FAF1	0.260853	0.260853	2.28351	0.026919	0.408588	-3.56634
SPG21	0.195433	0.195433	2.2831	0.0269449	0.408588	-3.56713
PSMD13	0.148142	0.148142	2.28307	0.0269467	0.408588	-3.56718
SNORD92	0.314056	0.314056	2.28298	0.0269528	0.408588	-3.56737
ACTL6A	0.128984	0.128984	2.2825	0.0269832	0.408821	-3.56829
EPCAM	0.207792	0.207792	2.28201	0.0270146	0.409069	-3.56924
ZNF697	0.124232	0.124232	2.2808	0.0270912	0.409785	-3.57155
OCM	0.135131	0.135131	2.28079	0.0270919	0.409785	-3.57157
LSM3	0.180784	0.180784	2.28056	0.0271069	0.409785	-3.57203
CIR1	0.154604	0.154604	2.27996	0.0271453	0.410139	-3.57319
HNRNPA1P27	0.134122	0.134122	2.2786	0.0272325	0.410989	-3.57581
WNT1	0.126423	0.126423	2.27829	0.027252	0.410989	-3.57639
EP400	0.131291	0.131291	2.27806	0.0272671	0.410989	-3.57685
DHX9	0.122688	0.122688	2.27787	0.027279	0.410989	-3.5772
TMEM123	0.254137	0.254137	2.27736	0.0273117	0.410989	-3.57818
ZNF282	0.129225	0.129225	2.27682	0.0273469	0.410989	-3.57923
TMEM64	0.191817	0.191817	2.27675	0.027351	0.410989	-3.57936
HPDL	0.123908	0.123908	2.27655	0.0273642	0.410989	-3.57975
KRT23	0.28212	0.28212	2.2765	0.0273671	0.410989	-3.57984
SLC25A33	0.16153	0.16153	2.27537	0.0274402	0.411732	-3.58202
SNRPB	0.11849	0.11849	2.27527	0.0274468	0.411732	-3.58221
POMZP3	0.181496	0.181496	2.27403	0.0275266	0.412476	-3.58459
GTF2IRD1	0.17005	0.17005	2.27355	0.0275581	0.412722	-3.58552
HM13	0.248398	0.248398	2.2727	0.0276129	0.413316	-3.58715
CPSF4	0.143717	0.143717	2.27219	0.027646	0.413584	-3.58813
METTL23	0.156716	0.156716	2.27168	0.0276797	0.413861	-3.58912
TRBV10-1	0.104171	0.104171	2.27143	0.0276954	0.413869	-3.58958
RNF187	0.15825	0.15825	2.26941	0.0278272	0.415158	-3.59346
IDH3B	0.122795	0.122795	2.2686	0.0278808	0.415364	-3.59503
PLAGL2	0.196367	0.196367	2.26851	0.0278867	0.415364	-3.59521
TBPL1	0.199246	0.199246	2.26807	0.0279153	0.415393	-3.59605
ORC4	0.222069	0.222069	2.26674	0.0280023	0.416179	-3.59859
XYLB	0.158841	0.158841	2.26511	0.0281097	0.417062	-3.60171
PLEKHS1	0.268413	0.268413	2.26452	0.0281486	0.417216	-3.60284
PRKDC	0.138368	0.138368	2.2636	0.0282095	0.417408	-3.60461
CYC1	0.243904	0.243904	2.26326	0.0282322	0.417408	-3.60526
DDHD2	0.141468	0.141468	2.26317	0.028238	0.417408	-3.60543
ZNF800	0.176862	0.176862	2.26268	0.0282704	0.417556	-3.60637
GAPDHP65	0.110365	0.110365	2.2623	0.0282958	0.417556	-3.6071
APTR	0.191976	0.191976	2.2616	0.0283424	0.417556	-3.60844
PMEL	0.12969	0.12969	2.26158	0.0283434	0.417556	-3.60847
CTNNBL1	0.224888	0.224888	2.26141	0.028355	0.417556	-3.60881
ESF1	0.222141	0.222141	2.26	0.0284488	0.417947	-3.6115
METTL5	0.167933	0.167933	2.25986	0.0284581	0.417947	-3.61177
PMS2	0.152097	0.152097	2.25935	0.0284922	0.418223	-3.61275
PARP1	0.178756	0.178756	2.25811	0.0285752	0.418741	-3.61512
PPIAL4C	0.145025	0.145025	2.2581	0.0285755	0.418741	-3.61513
CD274	0.180209	0.180209	2.258	0.0285824	0.418741	-3.61533
CKLF	0.237746	0.237746	2.25791	0.0285889	0.418741	-3.61551
AZIN1	0.237891	0.237891	2.25729	0.02863	0.418904	-3.61668
CLIC1	0.22159	0.22159	2.2571	0.0286431	0.418904	-3.61706
SIVA1	0.0847117	0.0847117	2.25571	0.0287362	0.419554	-3.6197
DESI2	0.203307	0.203307	2.25571	0.0287366	0.419554	-3.61972
IMPDH2	0.217804	0.217804	2.25536	0.0287596	0.419665	-3.62037
MANSC1	0.218501	0.218501	2.25505	0.0287805	0.419746	-3.62096
BCDIN3D	0.105154	0.105154	2.25449	0.0288188	0.42008	-3.62205
OGT	0.16171	0.16171	2.25345	0.0288885	0.420647	-3.62402
TMEM241	0.167723	0.167723	2.25281	0.0289322	0.42089	-3.62525
GSS	0.190192	0.190192	2.25275	0.028936	0.42089	-3.62536
PPIAP21	0.147895	0.147895	2.25216	0.0289761	0.421249	-3.62649
KPNA4	0.175601	0.175601	2.25164	0.0290115	0.421315	-3.62748
RPS15AP1	0.251221	0.251221	2.25154	0.0290179	0.421315	-3.62766
ATF1	0.180297	0.180297	2.25108	0.0290496	0.421315	-3.62855
NACC1	0.152361	0.152361	2.25031	0.0291015	0.421315	-3.63001
IRF2BP2	0.145205	0.145205	2.25009	0.0291164	0.421315	-3.63043
TCEA1	0.307561	0.307561	2.24953	0.029155	0.421315	-3.63151
RNF216P1	0.181965	0.181965	2.24924	0.0291743	0.421315	-3.63205
PRRG2	0.12673	0.12673	2.24903	0.0291888	0.421315	-3.63245
DPY19L1P1	0.18692	0.18692	2.24819	0.0292466	0.421315	-3.63407
YEATS4	0.212104	0.212104	2.24801	0.0292587	0.421315	-3.6344
OAZ1	0.131642	0.131642	2.24768	0.0292815	0.421315	-3.63504
ENGASE	0.152526	0.152526	2.24728	0.0293088	0.421315	-3.6358
FOCAD	0.154144	0.154144	2.24679	0.029342	0.421315	-3.63672
GEMIN6	0.168067	0.168067	2.24642	0.0293676	0.421315	-3.63743
FAHD2A	0.148761	0.148761	2.24631	0.0293751	0.421315	-3.63764
IL17RB	0.172391	0.172391	2.24624	0.02938	0.421315	-3.63777
ZNFX1	0.10988	0.10988	2.24601	0.0293955	0.421315	-3.63821
FBXL4	0.158153	0.158153	2.24598	0.0293976	0.421315	-3.63826
RPL39P25	0.221568	0.221568	2.24565	0.0294206	0.421315	-3.6389
MTCH2	0.16209	0.16209	2.24554	0.0294281	0.421315	-3.63911
FDPSP8	0.115774	0.115774	2.24499	0.0294658	0.421335	-3.64015
GOLGA6L22	0.0984913	0.0984913	2.2447	0.0294858	0.421335	-3.6407
ZBED5	0.129294	0.129294	2.24442	0.0295052	0.421335	-3.64124
CCDC14	0.214769	0.214769	2.24431	0.0295125	0.421335	-3.64144
PPIAP3	0.10154	0.10154	2.24382	0.029546	0.421335	-3.64237
AJUBA	0.178067	0.178067	2.24345	0.0295719	0.421335	-3.64308
TSEN2	0.167319	0.167319	2.24344	0.0295727	0.421335	-3.64311
RPL7P38	0.106869	0.106869	2.2431	0.029596	0.421335	-3.64375
EPHB4	0.129241	0.129241	2.24294	0.0296068	0.421335	-3.64404
ZNF81	0.133904	0.133904	2.24287	0.0296121	0.421335	-3.64419
COX17P1	0.178222	0.178222	2.24111	0.0297337	0.422341	-3.64753
PRIM1	0.155659	0.155659	2.24091	0.0297474	0.422341	-3.6479
CEACAMP2	0.109895	0.109895	2.24	0.0298108	0.42275	-3.64964
WNT10B	0.124046	0.124046	2.23991	0.0298172	0.42275	-3.64982
RAB18	0.199708	0.199708	2.23983	0.0298226	0.42275	-3.64996
TMEM185B	0.14248	0.14248	2.2393	0.0298596	0.422835	-3.65097
RAB2A	0.257	0.257	2.23873	0.0298989	0.423057	-3.65204
DDX11L10	0.113981	0.113981	2.23863	0.0299062	0.423057	-3.65224
MOCS3	0.171193	0.171193	2.23831	0.0299286	0.423149	-3.65285
NHP2P2	0.116648	0.116648	2.23809	0.0299437	0.423149	-3.65326
TAF1D	0.262523	0.262523	2.23688	0.0300287	0.423946	-3.65557
PSMF1	0.153692	0.153692	2.23657	0.0300502	0.423946	-3.65615
OBSCN	0.121981	0.121981	2.23641	0.0300616	0.423946	-3.65646
NAMPTP3	0.178004	0.178004	2.23615	0.0300794	0.423969	-3.65695
PPIAL4G	0.139574	0.139574	2.23443	0.0302006	0.425019	-3.66022
SMIM19	0.279141	0.279141	2.23299	0.0303014	0.425779	-3.66294
STX16	0.157944	0.157944	2.23223	0.0303551	0.426123	-3.66438
RPSAP3	0.162858	0.162858	2.23166	0.0303955	0.426336	-3.66546
SNORA15	0.107092	0.107092	2.23136	0.0304166	0.426336	-3.66602
HOMEZ	0.134425	0.134425	2.23133	0.0304191	0.426336	-3.66609
COG2	0.130746	0.130746	2.23008	0.0305079	0.4273	-3.66846
HMGXB4	0.147033	0.147033	2.22985	0.0305236	0.4273	-3.66888
NT5DC1	0.179975	0.179975	2.22933	0.0305608	0.4273	-3.66988
RPS10P27	0.130521	0.130521	2.22905	0.0305805	0.4273	-3.6704
FBXL6	0.129127	0.129127	2.22889	0.0305919	0.4273	-3.6707
LYPLA2P3	0.0960659	0.0960659	2.22814	0.0306454	0.427533	-3.67213
GOLT1A	0.198497	0.198497	2.22759	0.0306849	0.427674	-3.67317
NDUFB2	0.266779	0.266779	2.22756	0.0306869	0.427674	-3.67322
RPL18A	0.159693	0.159693	2.22595	0.0308018	0.428805	-3.67627
YPEL4	0.136092	0.136092	2.22563	0.0308245	0.428805	-3.67687
IPMK	0.155892	0.155892	2.22547	0.0308363	0.428805	-3.67718
EEF1B2P7	0.128107	0.128107	2.22542	0.0308397	0.428805	-3.67727
KRT18P20	0.097477	0.097477	2.22401	0.0309409	0.42915	-3.67993
FANCF	0.201492	0.201492	2.22388	0.0309501	0.42915	-3.68018
RPL15	0.180184	0.180184	2.22385	0.0309525	0.42915	-3.68024
EIF2A	0.182739	0.182739	2.22367	0.0309657	0.42915	-3.68058
TMEM120B	0.124962	0.124962	2.22275	0.0310316	0.429552	-3.68231
LARP4	0.154819	0.154819	2.22261	0.0310419	0.429552	-3.68258
LCE2A	0.133255	0.133255	2.22199	0.0310862	0.429947	-3.68374
RPL36AP48	0.146002	0.146002	2.22137	0.0311309	0.430151	-3.68491
ARGLU1	0.214187	0.214187	2.22132	0.0311347	0.430151	-3.68501
TBC1D22B	0.147319	0.147319	2.22101	0.0311572	0.430151	-3.6856
DEFB107B	0.119596	0.119596	2.22088	0.0311668	0.430151	-3.68585
DLGAP5	0.192326	0.192326	2.22028	0.03121	0.430352	-3.68698
RPL5	0.203606	0.203606	2.22004	0.0312274	0.430373	-3.68743
NEDD4	0.186641	0.186641	2.21941	0.031273	0.430543	-3.68862
POM121B	0.162471	0.162471	2.21937	0.0312757	0.430543	-3.68869
SEH1L	0.15143	0.15143	2.21916	0.0312915	0.430543	-3.6891
CST4	0.321238	0.321238	2.21876	0.0313206	0.430543	-3.68985
VHL	0.103348	0.103348	2.21768	0.0313991	0.430543	-3.69189
MORF4L2P1	0.119012	0.119012	2.21754	0.0314091	0.430543	-3.69215
SLC39A10	0.169207	0.169207	2.21746	0.0314146	0.430543	-3.69229
HEATR1	0.194849	0.194849	2.21711	0.03144	0.430543	-3.69295
ACTR8	0.141922	0.141922	2.21619	0.0315072	0.430543	-3.69468
MFF	0.184616	0.184616	2.21532	0.0315713	0.430543	-3.69634
MRPS10P1	0.201611	0.201611	2.21467	0.0316189	0.430543	-3.69756
C1QTNF1	0.117622	0.117622	2.21454	0.0316279	0.430543	-3.69779
GPN1	0.150445	0.150445	2.21451	0.0316304	0.430543	-3.69786
ZBTB7B	0.133321	0.133321	2.21446	0.0316341	0.430543	-3.69795
UPF3B	0.209522	0.209522	2.21426	0.0316485	0.430543	-3.69832
PPIAP13	0.138481	0.138481	2.21423	0.0316504	0.430543	-3.69837
FAM8A6P	0.089366	0.089366	2.21416	0.0316559	0.430543	-3.69851
CYP3A54P	0.112785	0.112785	2.21395	0.031671	0.430543	-3.6989
GS1-124K5.11	0.146976	0.146976	2.21367	0.0316919	0.430543	-3.69944
PET100	0.179733	0.179733	2.21356	0.0317002	0.430543	-3.69965
RPL18P13	0.231171	0.231171	2.2132	0.0317264	0.430543	-3.70032
AFMID	0.169214	0.169214	2.21287	0.0317503	0.430543	-3.70093
USP10	0.223538	0.223538	2.21275	0.0317593	0.430543	-3.70116
MBTPS1	0.120525	0.120525	2.21256	0.0317737	0.430543	-3.70153
DR1	0.16302	0.16302	2.21188	0.0318232	0.430543	-3.7028
VGF	0.144222	0.144222	2.21175	0.0318331	0.430543	-3.70305
DNAJA1	0.228907	0.228907	2.21143	0.0318568	0.430543	-3.70365
LIN9	0.138241	0.138241	2.21141	0.0318578	0.430543	-3.70368
B3GNT2	0.17573	0.17573	2.21132	0.0318646	0.430543	-3.70385
FAM182B	0.11064	0.11064	2.21098	0.03189	0.430543	-3.7045
RPS20P5	0.139683	0.139683	2.21075	0.0319067	0.430543	-3.70492
UQCRH	0.262728	0.262728	2.21041	0.0319316	0.430543	-3.70556
ZNF721	0.165084	0.165084	2.21017	0.0319493	0.430543	-3.70601
SGF29	0.11833	0.11833	2.20972	0.0319832	0.430701	-3.70687
RAB21	0.147278	0.147278	2.20827	0.0320906	0.431283	-3.70959
APOBEC3H	0.117476	0.117476	2.20815	0.032099	0.431283	-3.70981
SCML2	0.138601	0.138601	2.20792	0.0321166	0.431308	-3.71025
COX6CP1	0.14019	0.14019	2.20735	0.0321589	0.43145	-3.71132
PUM3	0.22725	0.22725	2.20662	0.032213	0.43187	-3.71269
RBM39	0.169665	0.169665	2.20584	0.032271	0.432318	-3.71415
TGIF2	0.162388	0.162388	2.20534	0.0323087	0.43261	-3.7151
CBFB	0.117195	0.117195	2.20508	0.0323276	0.432651	-3.71557
ASIC2	0.120694	0.120694	2.20441	0.0323777	0.432928	-3.71683
LRRC58	0.160956	0.160956	2.20438	0.03238	0.432928	-3.71689
UBA2	0.158988	0.158988	2.20394	0.0324129	0.433155	-3.71771
RPL23AP72	0.0882513	0.0882513	2.20309	0.0324771	0.433285	-3.71932
GIPR	0.119905	0.119905	2.20297	0.0324856	0.433285	-3.71953
ZC3H8	0.217482	0.217482	2.20297	0.032486	0.433285	-3.71954
TAP1	0.220397	0.220397	2.20191	0.0325656	0.434134	-3.72153
TRIQK	0.23758	0.23758	2.20147	0.0325982	0.434356	-3.72234
TRBV5-4	0.107058	0.107058	2.20118	0.0326206	0.434443	-3.7229
RPS20P2	0.0898644	0.0898644	2.20008	0.0327035	0.435122	-3.72496
ANXA4	0.165909	0.165909	2.19962	0.032738	0.435291	-3.72581
CFAP61	0.0901322	0.0901322	2.19949	0.0327481	0.435291	-3.72606
TROAP	0.125555	0.125555	2.19862	0.0328132	0.435906	-3.72768
DDX1	0.172346	0.172346	2.19845	0.0328262	0.435906	-3.728
NUP62	0.087201	0.087201	2.19819	0.0328459	0.435955	-3.72849
TCF19	0.1464	0.1464	2.19741	0.0329052	0.436524	-3.72995
RBMX2	0.143144	0.143144	2.19721	0.0329208	0.436524	-3.73033
TTI2	0.134398	0.134398	2.19607	0.0330073	0.437247	-3.73246
GNG5P2	0.132041	0.132041	2.19487	0.0330983	0.438239	-3.7347
CABIN1	0.0937519	0.0937519	2.19442	0.0331329	0.438484	-3.73554
TRAV24	0.136769	0.136769	2.19329	0.0332191	0.439285	-3.73765
SHCBP1	0.225974	0.225974	2.19321	0.0332255	0.439285	-3.73781
GAPDHP60	0.217752	0.217752	2.1914	0.0333638	0.440437	-3.74118
RPL22P19	0.114036	0.114036	2.19102	0.0333934	0.440437	-3.7419
CYP2C58P	0.0921464	0.0921464	2.191	0.0333949	0.440437	-3.74193
HNRNPA2B1	0.164166	0.164166	2.1906	0.0334256	0.440437	-3.74268
ARMT1	0.174877	0.174877	2.19011	0.0334632	0.440598	-3.74359
PFDN2	0.176772	0.176772	2.18972	0.0334935	0.440598	-3.74432
NME1	0.188773	0.188773	2.18965	0.0334987	0.440598	-3.74445
PSTK	0.12829	0.12829	2.18805	0.0336222	0.441748	-3.74743
WDR75	0.14005	0.14005	2.18769	0.0336501	0.441789	-3.74811
RFT1	0.160613	0.160613	2.18679	0.0337199	0.441789	-3.74979
TIMM44	0.147239	0.147239	2.18676	0.0337224	0.441789	-3.74985
DPY19L4	0.234989	0.234989	2.18568	0.0338058	0.44214	-3.75185
EXO5	0.112194	0.112194	2.18492	0.0338647	0.44214	-3.75326
SPP1	0.445281	0.445281	2.18486	0.0338694	0.44214	-3.75337
TUFMP1	0.123117	0.123117	2.1848	0.0338744	0.44214	-3.75349
C12orf29	0.191357	0.191357	2.18474	0.0338787	0.44214	-3.7536
VDAC2	0.270333	0.270333	2.18397	0.0339392	0.442507	-3.75504
RPS9	0.147205	0.147205	2.18357	0.0339704	0.442702	-3.75579
VRK1	0.262787	0.262787	2.18265	0.0340423	0.4431	-3.7575
RPS25	0.221168	0.221168	2.18187	0.0341031	0.443452	-3.75895
PCGF1	0.154856	0.154856	2.18179	0.0341092	0.443452	-3.75909
TBL2	0.192453	0.192453	2.18096	0.0341745	0.443822	-3.76064
OR2W4P	0.0897473	0.0897473	2.18082	0.0341854	0.443822	-3.7609
MRPS21P3	0.136056	0.136056	2.18081	0.0341864	0.443822	-3.76092
FOXP3	0.113792	0.113792	2.18049	0.0342113	0.443934	-3.76151
PPID	0.125605	0.125605	2.17975	0.0342697	0.444082	-3.76289
C20orf27	0.106489	0.106489	2.17961	0.0342801	0.444082	-3.76314
B2M	0.245129	0.245129	2.17952	0.0342878	0.444082	-3.76332
HSPD1P18	0.101679	0.101679	2.17867	0.0343545	0.44422	-3.7649
IMP3	0.150811	0.150811	2.17857	0.0343623	0.44422	-3.76508
FKSG29	0.205873	0.205873	2.17856	0.0343635	0.44422	-3.76511
RPL38	0.206738	0.206738	2.17826	0.0343866	0.444308	-3.76565
SNORD66	0.121225	0.121225	2.17745	0.0344506	0.444924	-3.76716
WFIKKN2	0.0953436	0.0953436	2.17649	0.0345266	0.445695	-3.76894
AOAH	0.407875	0.407875	2.17572	0.0345877	0.446062	-3.77038
ATP6V1G2-DDX39B	0.106274	0.106274	2.17487	0.0346549	0.446712	-3.77195
TMEM231	0.118129	0.118129	2.1745	0.0346844	0.446712	-3.77264
DUSP12	0.0983826	0.0983826	2.17442	0.0346907	0.446712	-3.77278
UBD	0.417364	0.417364	2.17426	0.0347036	0.446712	-3.77308
SLC25A5P5	0.179532	0.179532	2.17394	0.0347291	0.44683	-3.77368
NDUFS6	0.132531	0.132531	2.17305	0.0347997	0.44713	-3.77533
PRKAR2A	0.125738	0.125738	2.17285	0.0348155	0.44713	-3.77569
TMEM248	0.202364	0.202364	2.17268	0.0348293	0.44713	-3.77601
AIFM1	0.118213	0.118213	2.17221	0.0348671	0.44713	-3.77689
RPS20P14	0.23997	0.23997	2.17176	0.0349031	0.447382	-3.77773
PSMB3	0.147518	0.147518	2.17102	0.0349619	0.447856	-3.77909
RAC1P3	0.112984	0.112984	2.17089	0.0349728	0.447856	-3.77934
RPSAP20	0.100956	0.100956	2.17035	0.0350153	0.44808	-3.78033
PIGP	0.199508	0.199508	2.16943	0.0350897	0.448456	-3.78204
RPS15AP24	0.229086	0.229086	2.16941	0.0350909	0.448456	-3.78207
EID2	0.100021	0.100021	2.16928	0.0351019	0.448456	-3.78232
SRRM1	0.211283	0.211283	2.16896	0.0351276	0.448562	-3.78292
ODF3L2	0.13304	0.13304	2.16865	0.0351523	0.448562	-3.78349
DNAAF5	0.130001	0.130001	2.16856	0.0351597	0.448562	-3.78366
SLPI	0.329518	0.329518	2.16697	0.0352876	0.449105	-3.7866
STK25	0.12938	0.12938	2.16681	0.0353001	0.449105	-3.78688
TOP1	0.1756	0.1756	2.16643	0.0353314	0.449105	-3.7876
EMG1	0.185256	0.185256	2.1663	0.0353417	0.449105	-3.78783
ENTPD6	0.194726	0.194726	2.16599	0.0353665	0.449105	-3.7884
KCNH4	0.119944	0.119944	2.16455	0.0354836	0.450383	-3.79108
OGFOD1	0.114192	0.114192	2.16387	0.0355382	0.450506	-3.79232
AFG3L1P	0.115007	0.115007	2.16384	0.0355412	0.450506	-3.79239
RFXAP	0.150766	0.150766	2.16309	0.0356022	0.450506	-3.79378
NUP210	0.167173	0.167173	2.16221	0.0356731	0.450506	-3.79538
PDHA1	0.158839	0.158839	2.16203	0.0356884	0.450506	-3.79573
UQCRC2	0.24167	0.24167	2.16202	0.0356886	0.450506	-3.79574
RPS8	0.247305	0.247305	2.16179	0.0357078	0.450506	-3.79617
ZNF280C	0.154693	0.154693	2.16165	0.0357189	0.450506	-3.79642
PPIAP20	0.116733	0.116733	2.1614	0.0357393	0.450506	-3.79688
EPPK1	0.234666	0.234666	2.16073	0.0357939	0.450506	-3.79812
PAK1IP1	0.150581	0.150581	2.16063	0.0358022	0.450506	-3.79831
EIF5A	0.173918	0.173918	2.16059	0.0358056	0.450506	-3.79838
TERF2	0.217306	0.217306	2.16042	0.0358194	0.450506	-3.79869
RAD51C	0.153587	0.153587	2.16038	0.035823	0.450506	-3.79878
RTN3P1	0.14405	0.14405	2.16037	0.0358234	0.450506	-3.79878
MRPL34	0.121081	0.121081	2.15966	0.0358818	0.450826	-3.8001
TPI1P1	0.0878679	0.0878679	2.15842	0.0359831	0.451891	-3.80238
RPL24P4	0.187183	0.187183	2.15731	0.0360747	0.452022	-3.80444
RPL5P34	0.140438	0.140438	2.15677	0.0361188	0.452022	-3.80542
ZNF207	0.154987	0.154987	2.15672	0.0361234	0.452022	-3.80553
SPIN4	0.150659	0.150659	2.15627	0.0361605	0.452022	-3.80636
YBX1P10	0.166332	0.166332	2.15617	0.0361683	0.452022	-3.80653
RPSAP74	0.0965499	0.0965499	2.15596	0.0361856	0.452022	-3.80692
GAPDHP29	0.111819	0.111819	2.1559	0.0361907	0.452022	-3.80703
RPSAP24	0.112787	0.112787	2.15583	0.0361962	0.452022	-3.80715
RPS14	0.231082	0.231082	2.15568	0.0362088	0.452022	-3.80744
MLF2	0.0947919	0.0947919	2.15447	0.0363088	0.452881	-3.80966
FHIT	0.130442	0.130442	2.15425	0.0363274	0.452881	-3.81008
RFWD3	0.0975845	0.0975845	2.15392	0.0363548	0.453016	-3.81069
RPS15A	0.212826	0.212826	2.15122	0.0365791	0.454567	-3.81566
PTMAP8	0.148206	0.148206	2.15082	0.0366124	0.454642	-3.81639
URM1	0.160549	0.160549	2.14951	0.0367215	0.455506	-3.8188
DTYMK	0.136507	0.136507	2.14912	0.0367542	0.455525	-3.81951
TUFM	0.11444	0.11444	2.14899	0.0367651	0.455525	-3.81975
RPL12	0.238785	0.238785	2.14655	0.0369694	0.457336	-3.82423
TMEM126B	0.13024	0.13024	2.14591	0.037023	0.457368	-3.8254
ANKH	0.167151	0.167151	2.14526	0.0370779	0.457368	-3.8266
ASS1	0.235186	0.235186	2.14487	0.0371107	0.457368	-3.82731
POLR2H	0.142876	0.142876	2.14487	0.0371109	0.457368	-3.82732
KIF18A	0.133924	0.133924	2.14451	0.0371411	0.457368	-3.82797
TUBGCP4	0.223973	0.223973	2.14421	0.0371664	0.457368	-3.82852
VMA21	0.138683	0.138683	2.14397	0.0371869	0.457368	-3.82897
PGGT1BP1	0.101499	0.101499	2.14381	0.0372003	0.457368	-3.82926
PCBD2	0.116382	0.116382	2.14374	0.0372066	0.457368	-3.82939
SYNGR2	0.186805	0.186805	2.14298	0.0372705	0.45751	-3.83078
SNORD69	0.205326	0.205326	2.14284	0.0372829	0.45751	-3.83105
DNAJC19P6	0.111297	0.111297	2.14279	0.0372865	0.45751	-3.83112
SALL4P1	0.109659	0.109659	2.14279	0.0372866	0.45751	-3.83113
COX20	0.15865	0.15865	2.1425	0.0373112	0.45751	-3.83166
PSME2	0.194301	0.194301	2.14241	0.0373187	0.45751	-3.83182
ST13P4	0.142748	0.142748	2.14183	0.0373681	0.457805	-3.83289
SPHK2	0.0921366	0.0921366	2.14142	0.0374027	0.457805	-3.83364
HNF4G	0.23891	0.23891	2.14135	0.0374094	0.457805	-3.83378
SLC25A15P1	0.113952	0.113952	2.14023	0.0375046	0.458599	-3.83583
POLR2G	0.112105	0.112105	2.14	0.0375238	0.458599	-3.83625
CCNI2	0.159722	0.159722	2.13923	0.037589	0.458826	-3.83765
NBR1	0.146572	0.146572	2.13918	0.0375941	0.458826	-3.83776
AKAP1	0.128924	0.128924	2.13833	0.0376664	0.459071	-3.83931
HSP90AB7P	0.104382	0.104382	2.1383	0.0376685	0.459071	-3.83935
GTPBP10	0.142396	0.142396	2.13799	0.0376951	0.459071	-3.83992
NCL	0.17358	0.17358	2.13689	0.0377891	0.459972	-3.84193
DIS3	0.15814	0.15814	2.13657	0.0378172	0.46011	-3.84253
RPS2P6	0.128013	0.128013	2.13537	0.0379195	0.460703	-3.84471
FAM170B-AS1	0.111322	0.111322	2.13533	0.0379234	0.460703	-3.84479
RPS24P16	0.0993084	0.0993084	2.13524	0.0379315	0.460703	-3.84497
PARD3	0.130662	0.130662	2.13457	0.0379891	0.460703	-3.84619
RPSAP2	0.13496	0.13496	2.13444	0.0379997	0.460703	-3.84641
ST6GALNAC4	0.11452	0.11452	2.13439	0.0380043	0.460703	-3.84651
RPS16P9	0.116211	0.116211	2.13418	0.0380222	0.460703	-3.84689
CDK6	0.137005	0.137005	2.13403	0.038035	0.460703	-3.84716
RPL21P67	0.113819	0.113819	2.13388	0.0380486	0.460703	-3.84745
PPP3R1	0.187283	0.187283	2.13384	0.0380516	0.460703	-3.84751
NUTM2B-AS1	0.219383	0.219383	2.13289	0.0381333	0.461114	-3.84924
SFTPB	0.0989358	0.0989358	2.13288	0.0381346	0.461114	-3.84927
SETDB2	0.13947	0.13947	2.13268	0.0381519	0.461114	-3.84964
DLGAP1-AS2	0.199594	0.199594	2.13236	0.0381796	0.461114	-3.85022
RPL7P50	0.167998	0.167998	2.13209	0.0382029	0.461114	-3.85071
RPS4XP14	0.19441	0.19441	2.13197	0.0382129	0.461114	-3.85092
SLCO5A1	0.161094	0.161094	2.13179	0.038229	0.461114	-3.85127
ENC1	0.167322	0.167322	2.13037	0.0383523	0.461881	-3.85386
LSM12	0.223868	0.223868	2.13022	0.0383654	0.461881	-3.85414
ELOVL7	0.210228	0.210228	2.13004	0.0383809	0.461881	-3.85446
ANAPC1	0.198413	0.198413	2.1297	0.0384101	0.461881	-3.85507
CTBP2P1	0.143205	0.143205	2.12934	0.038441	0.461881	-3.85572
RPS3	0.137782	0.137782	2.12919	0.0384544	0.461881	-3.856
KIZ	0.207291	0.207291	2.12895	0.0384753	0.461881	-3.85644
KBTBD6	0.115145	0.115145	2.12842	0.0385216	0.461881	-3.85741
SLC25A5P4	0.105361	0.105361	2.12813	0.0385471	0.461881	-3.85795
EFCAB14P1	0.127543	0.127543	2.12801	0.0385577	0.461881	-3.85817
LMBRD2	0.172946	0.172946	2.12799	0.0385586	0.461881	-3.85819
DEPDC1	0.173328	0.173328	2.12765	0.0385887	0.461881	-3.85881
SNORA80A	0.192214	0.192214	2.12765	0.0385888	0.461881	-3.85882
RIF1	0.171764	0.171764	2.12694	0.0386507	0.462414	-3.86011
BBS7	0.163802	0.163802	2.12636	0.038701	0.462414	-3.86116
MAD2L2	0.144633	0.144633	2.12587	0.0387443	0.462729	-3.86206
RPL7AP30	0.176807	0.176807	2.12537	0.0387882	0.46305	-3.86297
TMED10P2	0.119321	0.119321	2.12517	0.038806	0.46306	-3.86334
ZNF267	0.146063	0.146063	2.12401	0.0389074	0.463789	-3.86544
RPL23AP73	0.137488	0.137488	2.12332	0.0389685	0.463999	-3.86671
NMU	0.224208	0.224208	2.1219	0.0390937	0.464643	-3.86929
NT5C3B	0.256474	0.256474	2.12183	0.0390996	0.464643	-3.86941
PTPRO	0.45311	0.45311	2.12173	0.0391088	0.464643	-3.8696
WBP11P1	0.0881005	0.0881005	2.12103	0.0391707	0.465059	-3.87088
RPL37AP1	0.230175	0.230175	2.1184	0.0394039	0.466909	-3.87566
BTF3P11	0.221702	0.221702	2.11822	0.0394193	0.466909	-3.87597
RPL7AP31	0.155685	0.155685	2.11775	0.039461	0.467181	-3.87682
PLEK2	0.196336	0.196336	2.11756	0.0394781	0.467181	-3.87717
RPL7AP73	0.201618	0.201618	2.11739	0.0394936	0.467181	-3.87749
COX11	0.136293	0.136293	2.11628	0.0395928	0.467949	-3.87951
FANCA	0.165469	0.165469	2.11574	0.0396402	0.468025	-3.88047
MAPKAPK5	0.143748	0.143748	2.11542	0.0396689	0.468025	-3.88105
SMAGP	0.18991	0.18991	2.11541	0.0396698	0.468025	-3.88107
RPS14P8	0.157948	0.157948	2.11489	0.0397163	0.468025	-3.88201
ZMYND8	0.281219	0.281219	2.11487	0.0397182	0.468025	-3.88205
LRFN1	0.106247	0.106247	2.11478	0.0397264	0.468025	-3.88222
WDR3	0.104189	0.104189	2.11467	0.0397364	0.468025	-3.88242
EPB41L5	0.194145	0.194145	2.11441	0.0397601	0.468069	-3.8829
LPIN3	0.138197	0.138197	2.11411	0.0397863	0.468069	-3.88343
PAXBP1	0.173631	0.173631	2.11282	0.0399021	0.468966	-3.88577
ALG13	0.232597	0.232597	2.11232	0.0399473	0.46921	-3.88668
PPIAP11	0.157958	0.157958	2.11197	0.0399785	0.469257	-3.88731
CXCL3	0.141463	0.141463	2.1116	0.0400119	0.469448	-3.88798
FAM221A	0.133078	0.133078	2.11101	0.0400651	0.469745	-3.88905
SNORA18	0.188323	0.188323	2.11094	0.0400717	0.469745	-3.88918
LARP1	0.167008	0.167008	2.10995	0.0401608	0.470386	-3.89097
RPL21P104	0.102244	0.102244	2.10965	0.040188	0.470502	-3.89151
BAZ1A	0.199919	0.199919	2.1093	0.0402196	0.470671	-3.89215
C14orf119	0.15404	0.15404	2.10902	0.040245	0.47069	-3.89265
NPM1P6	0.122208	0.122208	2.1089	0.0402557	0.47069	-3.89287
SFXN2	0.114342	0.114342	2.1086	0.0402837	0.470816	-3.89343
RPL30P15	0.14599	0.14599	2.10771	0.0403638	0.471107	-3.89503
CRLS1	0.16252	0.16252	2.10732	0.0403992	0.471107	-3.89573
RPS23P6	0.113925	0.113925	2.10718	0.0404121	0.471107	-3.89599
SBDS	0.246747	0.246747	2.10716	0.0404139	0.471107	-3.89602
PMS2P7	0.197269	0.197269	2.10699	0.0404294	0.471107	-3.89633
ATF4	0.123631	0.123631	2.10598	0.0405215	0.471979	-3.89816
RPL12P12	0.264335	0.264335	2.10555	0.0405602	0.472018	-3.89893
TFAP4	0.115595	0.115595	2.10537	0.0405767	0.472018	-3.89926
CENPJ	0.145488	0.145488	2.10511	0.0406004	0.472092	-3.89973
HNRNPA1P63	0.118431	0.118431	2.10438	0.0406673	0.47214	-3.90105
TMEM205	0.144874	0.144874	2.10384	0.0407164	0.47214	-3.90202
LGALS8-AS1	0.121148	0.121148	2.10374	0.0407256	0.47214	-3.9022
NT5C1A	0.106819	0.106819	2.10343	0.040754	0.472156	-3.90276
ERVK13-1	0.195661	0.195661	2.10335	0.0407615	0.472156	-3.90291
SUPT16H	0.129068	0.129068	2.10289	0.0408039	0.472358	-3.90375
DNAJB12	0.127025	0.127025	2.10262	0.0408288	0.472358	-3.90423
PSMC2	0.175643	0.175643	2.1024	0.040849	0.472358	-3.90463
UBE2L4	0.221202	0.221202	2.10229	0.0408586	0.472358	-3.90482
OTX2-AS1	0.10089	0.10089	2.10222	0.0408655	0.472358	-3.90496
KDM5D	0.13486	0.13486	2.10191	0.0408933	0.47248	-3.9055
HNRNPK	0.177097	0.177097	2.10112	0.0409665	0.473125	-3.90694
AHCY	0.113008	0.113008	2.10088	0.0409882	0.473176	-3.90737
SMPD4	0.154422	0.154422	2.10061	0.041013	0.473179	-3.90785
SCARNA20	0.129519	0.129519	2.1005	0.0410232	0.473179	-3.90805
TM2D1	0.14986	0.14986	2.10005	0.041065	0.473261	-3.90887
MEPCE	0.149939	0.149939	2.09914	0.041149	0.473778	-3.91051
CHRAC1	0.198749	0.198749	2.099	0.0411619	0.473778	-3.91077
IDI1	0.168277	0.168277	2.0987	0.0411897	0.473899	-3.91131
RPL37A	0.196654	0.196654	2.09783	0.0412694	0.474262	-3.91286
UBE2V1	0.175873	0.175873	2.09653	0.0413906	0.474262	-3.91522
COX7A2P2	0.181057	0.181057	2.09644	0.0413986	0.474262	-3.91537
ATG12	0.152797	0.152797	2.09639	0.041403	0.474262	-3.91546
RMND1	0.104662	0.104662	2.09631	0.0414107	0.474262	-3.91561
ANKRD46	0.159305	0.159305	2.09576	0.0414623	0.474262	-3.91661
SET	0.209885	0.209885	2.09566	0.0414711	0.474262	-3.91678
MINCR	0.118095	0.118095	2.09566	0.0414713	0.474262	-3.91678
RPS2P4	0.106548	0.106548	2.09563	0.0414744	0.474262	-3.91684
FAM90A26	0.101421	0.101421	2.09555	0.0414819	0.474262	-3.91699
RBM18	0.149874	0.149874	2.09484	0.0415479	0.47429	-3.91826
RPS7P5	0.118169	0.118169	2.09471	0.0415597	0.47429	-3.91849
SNRPF	0.149722	0.149722	2.09404	0.0416222	0.47429	-3.9197
FBLL1	0.0969673	0.0969673	2.0937	0.0416537	0.47429	-3.92031
PIGUP1	0.158848	0.158848	2.09343	0.0416792	0.47429	-3.9208
KPNA1	0.145939	0.145939	2.09295	0.0417239	0.47429	-3.92166
HSPA1A	0.152735	0.152735	2.09293	0.0417256	0.47429	-3.92169
OR7E43P	0.118339	0.118339	2.09286	0.0417327	0.47429	-3.92183
MAPK13	0.109182	0.109182	2.09272	0.0417449	0.47429	-3.92206
ZBTB38	0.156334	0.156334	2.09194	0.0418182	0.474893	-3.92347
DNAJC11	0.194493	0.194493	2.09123	0.0418852	0.474893	-3.92476
AK4	0.21295	0.21295	2.09117	0.0418905	0.474893	-3.92486
GAPDHP32	0.102808	0.102808	2.09107	0.0418997	0.474893	-3.92504
ALDH1B1	0.143562	0.143562	2.09103	0.0419033	0.474893	-3.9251
ASNS	0.129894	0.129894	2.0907	0.0419347	0.474893	-3.92571
ZNF670	0.148208	0.148208	2.09067	0.0419371	0.474893	-3.92575
RPL39P38	0.191849	0.191849	2.09005	0.041996	0.475078	-3.92688
RPL30P3	0.1756	0.1756	2.08991	0.0420092	0.475078	-3.92713
HSP90AB2P	0.121245	0.121245	2.08978	0.0420206	0.475078	-3.92735
LSR	0.151635	0.151635	2.08936	0.0420603	0.475303	-3.92811
XRCC5	0.154192	0.154192	2.08857	0.0421352	0.475717	-3.92954
MYO1F	0.162239	0.162239	2.08843	0.0421482	0.475717	-3.92978
LANCL2	0.150945	0.150945	2.08728	0.0422566	0.475882	-3.93185
WAC	0.222426	0.222426	2.0871	0.0422734	0.475882	-3.93216
TMEM234	0.19342	0.19342	2.08697	0.0422859	0.475882	-3.9324
GAPDHP33	0.124347	0.124347	2.08656	0.0423249	0.476125	-3.93314
RBAK	0.093688	0.093688	2.08593	0.0423849	0.476533	-3.93428
CEP104	0.170719	0.170719	2.08571	0.0424056	0.476533	-3.93467
NPEPPS	0.147299	0.147299	2.08562	0.0424136	0.476533	-3.93482
NPM1P18	0.0951148	0.0951148	2.08519	0.0424548	0.4768	-3.9356
RPP25L	0.129748	0.129748	2.0847	0.0425007	0.477119	-3.93647
TXNL4B	0.148653	0.148653	2.08377	0.0425899	0.477728	-3.93815
EBAG9	0.214279	0.214279	2.08257	0.0427036	0.47828	-3.94029
UBE2M	0.216576	0.216576	2.08252	0.0427091	0.47828	-3.94039
ATXN1L	0.12082	0.12082	2.08236	0.042724	0.47828	-3.94067
RASL10B	0.120866	0.120866	2.08222	0.0427371	0.47828	-3.94092
ADPGK	0.138269	0.138269	2.08101	0.0428533	0.478992	-3.94309
BCRP3	0.10823	0.10823	2.08092	0.0428616	0.478992	-3.94325
EIF4A1P7	0.173341	0.173341	2.08022	0.0429287	0.479274	-3.9445
CSNK2A1	0.159305	0.159305	2.08012	0.0429384	0.479274	-3.94469
RPL36AP6	0.12638	0.12638	2.07934	0.0430133	0.479718	-3.94608
GAPDHP22	0.102636	0.102636	2.07878	0.0430669	0.48012	-3.94708
MRPL20P1	0.106444	0.106444	2.07801	0.043141	0.480749	-3.94846
TSC22D2	0.0797908	0.0797908	2.07714	0.0432248	0.481063	-3.95002
PINX1	0.192849	0.192849	2.07697	0.0432413	0.481063	-3.95032
POM121L12	0.0964067	0.0964067	2.07672	0.0432647	0.481063	-3.95075
SNORD87	0.171924	0.171924	2.07625	0.0433104	0.481109	-3.9516
TTPA	0.209186	0.209186	2.07608	0.0433268	0.481109	-3.95191
TEX43	0.111116	0.111116	2.07603	0.0433319	0.481109	-3.952
RAD54L2	0.137691	0.137691	2.07571	0.0433629	0.481258	-3.95257
SKA2P1	0.119654	0.119654	2.07511	0.0434207	0.481508	-3.95364
RHEBL1	0.117981	0.117981	2.07488	0.0434428	0.481557	-3.95405
CBLL1	0.179367	0.179367	2.07442	0.0434874	0.481855	-3.95487
RPL9P32	0.140246	0.140246	2.07339	0.0435878	0.482577	-3.95672
GPR153	0.100499	0.100499	2.07245	0.043679	0.482869	-3.95839
C8orf33	0.214444	0.214444	2.07241	0.0436824	0.482869	-3.95846
PGM3	0.186445	0.186445	2.07201	0.0437217	0.482869	-3.95918
CCL3L3	0.11391	0.11391	2.07183	0.0437388	0.482869	-3.95949
NOM1	0.0965441	0.0965441	2.07171	0.0437509	0.482869	-3.95971
RFC3	0.113083	0.113083	2.07029	0.0438895	0.48329	-3.96224
TRMO	0.186832	0.186832	2.07027	0.0438916	0.48329	-3.96228
SLC38A11	0.234303	0.234303	2.07018	0.0439	0.48329	-3.96244
NOMO2	0.150412	0.150412	2.06974	0.0439434	0.483572	-3.96323
TRMU	0.114823	0.114823	2.06925	0.0439913	0.483904	-3.9641
EIF1AX	0.153994	0.153994	2.06864	0.0440505	0.484284	-3.96518
SLC15A3	0.0961051	0.0961051	2.06809	0.0441046	0.484284	-3.96616
RNF165	0.129538	0.129538	2.068	0.0441134	0.484284	-3.96632
ASXL1	0.192285	0.192285	2.06776	0.0441368	0.484284	-3.96675
TMEM208	0.105774	0.105774	2.0677	0.0441427	0.484284	-3.96685
RPF1	0.19236	0.19236	2.06736	0.0441758	0.484284	-3.96745
MCTS1	0.163682	0.163682	2.06717	0.044195	0.484284	-3.9678
NPC1	0.111608	0.111608	2.067	0.044212	0.484284	-3.96811
HLTF	0.215429	0.215429	2.06691	0.0442209	0.484284	-3.96827
RPL12P6	0.117669	0.117669	2.0655	0.0443589	0.485405	-3.97076
ARL6IP1P1	0.0984979	0.0984979	2.0652	0.044389	0.48554	-3.97131
TRMT112P6	0.119989	0.119989	2.0645	0.0444579	0.485891	-3.97255
MBNL2	0.184543	0.184543	2.06405	0.0445023	0.485891	-3.97335
SH3RF2	0.149228	0.149228	2.06378	0.0445289	0.485891	-3.97383
ATXN7L2	0.110663	0.110663	2.06363	0.0445442	0.485891	-3.9741
IPO11	0.14955	0.14955	2.06348	0.0445584	0.485891	-3.97436
RPS10-NUDT3	0.105129	0.105129	2.06334	0.0445732	0.485891	-3.97462
ESPL1	0.103201	0.103201	2.06333	0.044574	0.485891	-3.97464
RNF170	0.191177	0.191177	2.06318	0.0445888	0.485891	-3.9749
SLC31A1	0.128694	0.128694	2.06273	0.0446335	0.485891	-3.9757
SPOCK2	0.0858849	0.0858849	2.06272	0.044634	0.485891	-3.97571
STARD7	0.170439	0.170439	2.06243	0.0446631	0.485891	-3.97624
SDHDP2	0.110644	0.110644	2.0624	0.0446656	0.485891	-3.97628
TRAPPC2P5	0.116471	0.116471	2.06234	0.0446715	0.485891	-3.97639
ZC3HAV1L	0.147838	0.147838	2.06221	0.0446848	0.485891	-3.97662
RPL13AP7	0.146959	0.146959	2.06218	0.044688	0.485891	-3.97668
MTHFS	0.181354	0.181354	2.06172	0.0447337	0.486194	-3.9775
NPM1P48	0.0885048	0.0885048	2.06077	0.0448282	0.486833	-3.97919
CLEC16A	0.104631	0.104631	2.05902	0.0450025	0.488193	-3.98229
NDUFB9	0.193699	0.193699	2.0588	0.0450245	0.488193	-3.98268
KSR1	0.112541	0.112541	2.05867	0.0450376	0.488193	-3.98292
HSP90AA4P	0.117857	0.117857	2.05836	0.045068	0.488193	-3.98346
NPM1P32	0.0988621	0.0988621	2.05831	0.0450734	0.488193	-3.98355
MRS2	0.124765	0.124765	2.0577	0.0451341	0.488601	-3.98463
ZMYM5	0.146147	0.146147	2.05728	0.0451757	0.488754	-3.98537
CICP17	0.0965483	0.0965483	2.05696	0.0452078	0.488754	-3.98594
SDHB	0.17577	0.17577	2.05684	0.0452199	0.488754	-3.98615
HUNK	0.183609	0.183609	2.05648	0.0452562	0.488921	-3.98679
LCE3A	0.106405	0.106405	2.05633	0.0452712	0.488921	-3.98706
NKRF	0.155911	0.155911	2.05498	0.0454072	0.489299	-3.98946
GSTK1	0.140923	0.140923	2.05484	0.0454216	0.489299	-3.98971
TOB2P1	0.092183	0.092183	2.05464	0.045441	0.489299	-3.99005
CHUK	0.136099	0.136099	2.05464	0.0454414	0.489299	-3.99006
RRP7BP	0.115879	0.115879	2.05427	0.0454789	0.489321	-3.99072
MMADHC	0.174198	0.174198	2.05407	0.0454986	0.489321	-3.99106
RPE	0.12371	0.12371	2.05354	0.0455521	0.489321	-3.992
DLEC1P1	0.0932558	0.0932558	2.05327	0.0455793	0.489321	-3.99248
RRN3	0.121917	0.121917	2.05296	0.0456112	0.489321	-3.99304
PIGT	0.176713	0.176713	2.05267	0.0456398	0.489321	-3.99354
FBXO5	0.133605	0.133605	2.05198	0.0457098	0.489321	-3.99477
HSPA8P1	0.155108	0.155108	2.05185	0.0457228	0.489321	-3.99499
NUTF2	0.128473	0.128473	2.05162	0.0457461	0.489321	-3.9954
RPL23AP52	0.124284	0.124284	2.05159	0.0457497	0.489321	-3.99546
CYCS	0.216547	0.216547	2.05158	0.0457504	0.489321	-3.99548
CNOT7	0.131945	0.131945	2.05141	0.0457678	0.489321	-3.99578
IDH3G	0.1272	0.1272	2.0514	0.0457691	0.489321	-3.9958
TBL1Y	0.110196	0.110196	2.05132	0.0457768	0.489321	-3.99594
PANK1	0.144918	0.144918	2.05131	0.0457772	0.489321	-3.99594
DCAF16	0.182962	0.182962	2.05099	0.04581	0.489321	-3.99652
ASH2L	0.129955	0.129955	2.05007	0.0459036	0.490129	-3.99815
FAM72C	0.180346	0.180346	2.04954	0.0459575	0.490425	-3.99909
RCBTB1	0.112171	0.112171	2.04942	0.0459693	0.490425	-3.99929
NUP43	0.113952	0.113952	2.04912	0.0459996	0.490425	-3.99982
CEP83	0.14257	0.14257	2.04909	0.0460031	0.490425	-3.99988
SOX13	0.122837	0.122837	2.04847	0.0460664	0.490673	-4.00098
MFN1	0.0970532	0.0970532	2.04846	0.0460675	0.490673	-4.001
EIF2S1	0.171987	0.171987	2.0479	0.0461246	0.490686	-4.00199
NDUFA12	0.268667	0.268667	2.04773	0.046142	0.490686	-4.00229
NUP155	0.214085	0.214085	2.04744	0.0461714	0.490686	-4.0028
SLC6A20	0.14487	0.14487	2.04664	0.0462529	0.491152	-4.00421
COX8A	0.160972	0.160972	2.0466	0.0462566	0.491152	-4.00427
HNRNPH3	0.119537	0.119537	2.04574	0.0463448	0.49119	-4.00579
NUP153	0.179967	0.179967	2.04446	0.0464766	0.492214	-4.00806
RPL7P54	0.0839227	0.0839227	2.04438	0.0464847	0.492214	-4.0082
ESRP1	0.200656	0.200656	2.04427	0.0464955	0.492214	-4.00838
DNAJC3	0.134958	0.134958	2.04385	0.046539	0.492397	-4.00913
AP1M2	0.123701	0.123701	2.04328	0.0465974	0.49272	-4.01013
PHKG2	0.111762	0.111762	2.04274	0.0466533	0.49299	-4.01109
SLC25A27	0.235615	0.235615	2.04268	0.0466591	0.49299	-4.01119
FAM41C	0.218058	0.218058	2.04236	0.0466923	0.493151	-4.01176
NFAT5	0.198718	0.198718	2.04168	0.046763	0.493543	-4.01297
PNP	0.181906	0.181906	2.04104	0.0468284	0.493543	-4.01408
KIF11	0.176814	0.176814	2.04099	0.0468335	0.493543	-4.01417
ERV3-1	0.218816	0.218816	2.04074	0.0468597	0.493543	-4.01462
C1orf53	0.20748	0.20748	2.04066	0.0468679	0.493543	-4.01476
HNRNPKP4	0.12025	0.12025	2.04043	0.0468922	0.493543	-4.01517
MYBL2	0.144662	0.144662	2.03975	0.0469625	0.493619	-4.01637
HMGB3P5	0.101186	0.101186	2.03965	0.0469722	0.493619	-4.01653
UBE2W	0.166855	0.166855	2.03948	0.0469896	0.493619	-4.01683
CACNA2D4	0.121802	0.121802	2.03908	0.0470318	0.493619	-4.01754
SCARNA6	0.15399	0.15399	2.03879	0.0470621	0.493619	-4.01806
UGGT1	0.121232	0.121232	2.03866	0.0470748	0.493619	-4.01827
RPUSD2	0.0909562	0.0909562	2.03846	0.0470957	0.493619	-4.01863
TTC1	0.137496	0.137496	2.03839	0.0471037	0.493619	-4.01876
FRK	0.149766	0.149766	2.03806	0.0471371	0.493619	-4.01933
MDH1	0.154632	0.154632	2.03757	0.0471887	0.493619	-4.0202
RPS4XP8	0.182115	0.182115	2.03712	0.0472349	0.4937	-4.02098
RDH10	0.184544	0.184544	2.03697	0.0472507	0.4937	-4.02125
[truncated: 25,303 more rows]

## Sheet: DE
Gene	logFC	AveExpr	t	P.Value	adj.P.Val	B
OLFML2B	0.784716	0.784716	7.53019	3.05328e-07	0.00117859	6.31492
INHBA	0.964428	0.964428	7.11333	7.0658e-07	0.00160759	5.62863
LUM	1.21245	1.21245	6.84486	1.22805e-06	0.0025791	5.17086
SULF1	1.00224	1.00224	6.40669	3.09007e-06	0.00544001	4.39742
PTPN14	0.563934	0.563934	6.24094	4.40946e-06	0.00708159	4.09651
PRDM6	0.462043	0.462043	6.01534	7.19434e-06	0.0103379	3.67978
SPOCK1	0.689788	0.689788	5.97885	7.79176e-06	0.0106214	3.61161
RDX	0.765104	0.765104	5.95722	8.16973e-06	0.0106214	3.5711
EDNRA	0.909869	0.909869	5.9238	8.79098e-06	0.0109096	3.50838
COL12A1	0.81244	0.81244	5.8787	9.70683e-06	0.0110423	3.42347
CTHRC1	0.973711	0.973711	5.80593	1.13959e-05	0.0124453	3.2858
PRRX1	0.901028	0.901028	5.74345	1.30856e-05	0.0137409	3.16694
LGALS1	0.817819	0.817819	5.66765	1.54842e-05	0.0156574	3.02198
COPZ2	0.972622	0.972622	5.63147	1.67833e-05	0.0163105	2.9525
COL10A1	1.09484	1.09484	5.57882	1.88758e-05	0.0164876	2.85105
TNFAIP6	0.882877	0.882877	5.56961	1.92685e-05	0.0164876	2.83326
IGFL1P1	0.639603	0.639603	5.5683	1.93247e-05	0.0164876	2.83074
ST6GAL2	1.41049	1.41049	5.51811	2.16228e-05	0.0168256	2.73358
FAP	1.39895	1.39895	5.50664	2.2186e-05	0.0168256	2.71132
BGN	1.27935	1.27935	5.44239	2.56296e-05	0.0189118	2.58635
SFRP4	1.44729	1.44729	5.28588	3.64883e-05	0.0249051	2.27961
RAB31	0.866676	0.866676	5.13132	5.18402e-05	0.0336986	1.97365
FN1	0.920781	0.920781	5.09488	5.63336e-05	0.0351216	1.90109
LOX	1.04388	1.04388	5.09279	5.66021e-05	0.0351216	1.89694
ITGBL1	0.755126	0.755126	5.0403	6.3814e-05	0.037875	1.79215
FAM133CP	0.679631	0.679631	4.99939	7.00788e-05	0.0407083	1.71026
MFAP2	0.868812	0.868812	4.93617	8.10097e-05	0.0460776	1.58338
THY1	0.598161	0.598161	4.91352	8.53348e-05	0.0473719	1.53782
NRP2	0.839494	0.839494	4.89772	8.84904e-05	0.0473719	1.506
MYOF	0.533678	0.533678	4.86562	9.52676e-05	0.0497416	1.44131
PODNL1	0.415475	0.415475	4.85164	9.83827e-05	0.0497416	1.41309
PLPP4	0.694842	0.694842	4.8196	0.000105917	0.052577	1.34836
SPARC	1.0714	1.0714	4.778	0.000116576	0.0558379	1.26418
NAV1	0.53335	0.53335	4.74384	0.00012614	0.059377	1.19493
LOXL1	1.06688	1.06688	4.68724	0.000143765	0.0637221	1.07997
RNF144A	0.457486	0.457486	4.66551	0.000151177	0.0640353	1.03577
PLPPR4	0.491685	0.491685	4.65847	0.000153657	0.0640353	1.02145
DCBLD2	0.892795	0.892795	4.6531	0.000155581	0.0640353	1.0105
TMEM200A	0.583358	0.583358	4.646	0.000158158	0.0640353	0.996052
EIF5A2	0.423221	0.423221	4.62686	0.000165324	0.0647532	0.957059
PLS3	0.570092	0.570092	4.58807	0.000180872	0.0692199	0.877943
LAMA2	0.624378	0.624378	4.5841	0.000182545	0.0692199	0.869837
CALD1	0.580026	0.580026	4.52866	0.000207592	0.0756452	0.756582
NISCH	0.588646	0.588646	4.47717	0.000233959	0.0808571	0.651197
CACNA1C-IT3	0.571474	0.571474	4.47716	0.000233965	0.0808571	0.651173
GPX8	0.664413	0.664413	4.46451	0.000240941	0.0820134	0.62527
CTSK	0.815614	0.815614	4.46029	0.000243319	0.0820134	0.61661
POSTN	0.991634	0.991634	4.41491	0.000270389	0.0875209	0.523567
ANTXR1	0.889945	0.889945	4.41159	0.000272481	0.0875209	0.516767
THBS2	0.865825	0.865825	4.35312	0.000312194	0.096733	0.396699
DZIP1	0.54681	0.54681	4.34882	0.000315334	0.096733	0.387866
PIP5K1C	0.324413	0.324413	4.34227	0.000320179	0.097128	0.374405
SFRP2	1.49411	1.49411	4.32876	0.000330406	0.0991291	0.346644
TSPAN2	0.535947	0.535947	4.30293	0.000350893	0.104131	0.293524
BICC1	0.750159	0.750159	4.28684	0.00036429	0.106945	0.260432
CERCAM	0.45135	0.45135	4.26012	0.00038769	0.109506	0.205441
MEIS3	0.478297	0.478297	4.25217	0.000394936	0.109506	0.189079
COL6A3	0.861913	0.861913	4.24406	0.000402471	0.109883	0.172382
SNORD113-4	0.983241	0.983241	4.23585	0.000410243	0.110437	0.155484
MXRA5	0.679966	0.679966	4.22947	0.000416385	0.110437	0.142352
VCAN-AS1	0.710794	0.710794	4.22921	0.000416638	0.110437	0.141816
PLXDC2	0.834529	0.834529	4.21631	0.000429357	0.111782	0.115244
COL24A1	0.652559	0.652559	4.20772	0.000438038	0.112824	0.0975552
VGLL3	0.706046	0.706046	4.19871	0.000447335	0.113971	0.0789942
RPGRIP1L	0.480341	0.480341	4.19292	0.00045342	0.113971	0.0670529
PIAS3	0.389713	0.389713	4.17876	0.000468633	0.116315	0.0378841
TIMP3	0.510104	0.510104	4.15302	0.000497617	0.118834	-0.0151627
SGIP1	0.706039	0.706039	4.14461	0.000507475	0.118834	-0.0325046
ALOX5AP	0.476794	0.476794	4.12487	0.000531372	0.118834	-0.0731867
IGFBP5	0.650249	0.650249	4.12247	0.000534352	0.118834	-0.0781315
DNM1	0.435905	0.435905	4.12076	0.00053649	0.118834	-0.0816626
NOX4	0.59498	0.59498	4.11885	0.000538886	0.118834	-0.0856023
RUNX1	0.601046	0.601046	4.1178	0.00054021	0.118834	-0.0877727
COL1A1	0.605567	0.605567	4.08788	0.000579236	0.124522	-0.14945
COL1A2	0.68637	0.68637	4.07361	0.000598843	0.127731	-0.17889
CD248	0.593024	0.593024	4.06028	0.00061775	0.128887	-0.206379
BMPR1B	0.405206	0.405206	4.038	0.00065069	0.129679	-0.252326
AEBP1	0.762264	0.762264	4.03798	0.000650723	0.129679	-0.25237
PYGO1	0.461546	0.461546	4.03442	0.000656138	0.129811	-0.2597
GGT5	0.386168	0.386168	4.00636	0.0007005	0.134808	-0.317568
PTPRM	0.536213	0.536213	4.0035	0.000705182	0.134808	-0.323461
KLF7	0.39057	0.39057	4.0002	0.000710636	0.134808	-0.330276
CLIC4	0.324512	0.324512	3.99994	0.000711069	0.134808	-0.330815
TIMP1	0.658745	0.658745	3.99518	0.000719007	0.134808	-0.340635
FBN1	0.663834	0.663834	3.99307	0.000722549	0.134808	-0.344982
C3	0.953626	0.953626	3.99175	0.000724769	0.134808	-0.347696
SEC24D	0.426569	0.426569	3.99112	0.000725838	0.134808	-0.348999
RUNX1-IT1	0.564463	0.564463	3.96061	0.000779343	0.140911	-0.411917
XGY2	1.33584	1.33584	3.95355	0.000792284	0.142309	-0.426486
TENM4	0.387573	0.387573	3.93584	0.000825658	0.147334	-0.462988
ADAMTS16	1.17188	1.17188	3.92719	0.000842486	0.147632	-0.480837
FGFR1	0.535613	0.535613	3.92665	0.000843548	0.147632	-0.481951
GFPT2	0.617818	0.617818	3.9198	0.000857109	0.148503	-0.49606
SPP1	1.12138	1.12138	3.90299	0.000891353	0.148503	-0.530719
PIEZO2	0.987421	0.987421	3.89895	0.000899786	0.148503	-0.539049
COL11A1	0.713333	0.713333	3.89527	0.000907539	0.148503	-0.546639
DLG4	0.438084	0.438084	3.85831	0.000989112	0.156097	-0.622786
ZNF532	0.743779	0.743779	3.84911	0.00101054	0.157657	-0.641751
KCTD20	0.290655	0.290655	3.83603	0.00104179	0.161607	-0.668688
ZEB1	0.524882	0.524882	3.80929	0.0011087	0.169405	-0.723758
ARL4C	0.498795	0.498795	3.79573	0.00114423	0.170709	-0.751663
THBS1	0.444255	0.444255	3.79107	0.00115671	0.171633	-0.76126
FSTL1	0.496686	0.496686	3.77897	0.00118974	0.17199	-0.786164
NHSL2	0.527825	0.527825	3.77513	0.0012004	0.17199	-0.794057
SNAI2	0.653678	0.653678	3.77394	0.00120373	0.17199	-0.796505
ADAM3B	0.426391	0.426391	3.76114	0.00124012	0.172308	-0.822852
ACTA2	0.805465	0.805465	3.76004	0.0012433	0.172308	-0.825115
RGCC	0.535898	0.535898	3.74648	0.0012831	0.175156	-0.852988
ANOS1	0.628166	0.628166	3.73788	0.00130903	0.176256	-0.870678
ATP2B4	0.555327	0.555327	3.72179	0.00135892	0.179233	-0.90376
ARSG	0.442358	0.442358	3.69704	0.00143933	0.18624	-0.954602
ZNF300P1	0.289327	0.289327	3.69111	0.00145928	0.18793	-0.966774
KLK10	0.446212	0.446212	3.66909	0.00153583	0.196861	-1.01199
SLC2A3P2	0.464603	0.464603	3.65861	0.00157365	0.198555	-1.03349
VSTM4	0.506611	0.506611	3.65546	0.00158517	0.198555	-1.03994
PCDH11X	0.304887	0.304887	3.65405	0.00159039	0.198555	-1.04285
COL5A1	0.573835	0.573835	3.65247	0.00159621	0.198555	-1.04608
NREP	0.440342	0.440342	3.65146	0.00159996	0.198555	-1.04815
SNORD114-21	0.65186	0.65186	3.63886	0.0016474	0.201198	-1.07399
ELOVL5	0.429646	0.429646	3.63853	0.00164868	0.201198	-1.07467
MDFIC	0.462308	0.462308	3.60584	0.00177849	0.2102	-1.14167
ADAMTSL4	0.316198	0.316198	3.59853	0.00180885	0.212868	-1.15663
TMEM45A	0.397893	0.397893	3.5913	0.00183941	0.214192	-1.17144
SLC12A8	0.653845	0.653845	3.58808	0.00185319	0.214389	-1.17803
SNORD114-28	0.501611	0.501611	3.57128	0.00192668	0.219422	-1.2124
ANGPTL2	0.436456	0.436456	3.56645	0.00194837	0.219422	-1.22229
BCAT1	0.378813	0.378813	3.56618	0.00194957	0.219422	-1.22283
HOXC9	0.656142	0.656142	3.56443	0.0019575	0.219422	-1.22642
AKAP12	0.703008	0.703008	3.561	0.00197311	0.219422	-1.23344
RFTN1	0.421947	0.421947	3.5511	0.00201883	0.219422	-1.25368
CYP1B1	0.831858	0.831858	3.55105	0.00201906	0.219422	-1.25378
APOC1P1	0.579162	0.579162	3.54863	0.00203036	0.219422	-1.25871
SULF2	0.503262	0.503262	3.5462	0.00204183	0.219422	-1.26369
NID2	0.453343	0.453343	3.54389	0.00205275	0.219422	-1.2684
VCAN	0.859639	0.859639	3.54248	0.00205949	0.219422	-1.27129
WDFY1	0.303771	0.303771	3.54061	0.0020684	0.219422	-1.27511
RUNX1T1	0.428984	0.428984	3.53936	0.00207436	0.219422	-1.27765
DNAH17-AS1	0.277159	0.277159	3.53787	0.00208155	0.219422	-1.2807
BASP1	0.389777	0.389777	3.52729	0.0021331	0.220598	-1.30232
COL6A2	0.318053	0.318053	3.52614	0.00213879	0.220598	-1.30467
SHISA4	0.346285	0.346285	3.5259	0.00213996	0.220598	-1.30515
UBE2Q2P6	0.392669	0.392669	3.5158	0.0021905	0.224831	-1.32577
BNC2	0.735461	0.735461	3.49947	0.00227471	0.230522	-1.35908
SRGAP2B	0.375737	0.375737	3.49437	0.00230166	0.230522	-1.36948
APOC1	0.638618	0.638618	3.49119	0.00231862	0.230522	-1.37597
TGFB3	1.15391	1.15391	3.49049	0.00232235	0.230522	-1.37739
S1PR2	0.307767	0.307767	3.48724	0.00233985	0.230522	-1.38401
RASSF2	0.411439	0.411439	3.48538	0.00234991	0.230522	-1.3878
SLIT3	0.702338	0.702338	3.48094	0.00237412	0.230522	-1.39685
ARHGAP1	0.385985	0.385985	3.4785	0.00238754	0.230522	-1.40183
CST2	0.418817	0.418817	3.47226	0.00242217	0.230522	-1.41454
FRMD6	0.482372	0.482372	3.46208	0.00247974	0.232652	-1.43528
HTRA1	0.596423	0.596423	3.45905	0.00249712	0.232962	-1.44144
WWTR1	0.351416	0.351416	3.45853	0.0025001	0.232962	-1.4425
NEK7	0.342489	0.342489	3.45246	0.00253533	0.23385	-1.45485
ANXA1	0.657532	0.657532	3.43772	0.00262297	0.239506	-1.48484
GUCY1A2	0.495165	0.495165	3.42897	0.0026764	0.24357	-1.50263
DSE	0.436051	0.436051	3.41787	0.00274568	0.249045	-1.52518
NBL1	0.356985	0.356985	3.41347	0.00277362	0.250746	-1.53411
SERPINF1	0.714613	0.714613	3.41115	0.00278844	0.251122	-1.53881
LSAMP	0.370845	0.370845	3.40995	0.00279617	0.251122	-1.54126
COL3A1	0.765721	0.765721	3.39819	0.00287285	0.253635	-1.56512
BOLA3-AS1	0.272963	0.272963	3.3972	0.00287942	0.253635	-1.56714
LEF1	0.387315	0.387315	3.39713	0.00287989	0.253635	-1.56728
TAGLN	0.523497	0.523497	3.37729	0.00301431	0.26095	-1.60751
SNORD114-30	0.575369	0.575369	3.36467	0.00310296	0.262195	-1.63307
CDR1	0.74032	0.74032	3.36347	0.00311154	0.262195	-1.6355
SNORD113-9	0.378672	0.378672	3.35401	0.00317988	0.265317	-1.65465
LRRC32	0.273613	0.273613	3.34649	0.00323524	0.265591	-1.66987
SNORD114-2	0.444553	0.444553	3.34101	0.00327616	0.265834	-1.68095
IGFBP3	0.625362	0.625362	3.34033	0.0032813	0.265834	-1.68233
S100A11	0.499775	0.499775	3.33375	0.00333123	0.267498	-1.69563
PIK3R5	0.376884	0.376884	3.32439	0.00340346	0.268152	-1.71454
ENAH	0.333949	0.333949	3.31222	0.00349977	0.272224	-1.73912
ROBO1	0.371485	0.371485	3.30789	0.00353462	0.272497	-1.74785
C1R	0.455278	0.455278	3.30652	0.00354573	0.272497	-1.75061
SNORD114-25	1.00992	1.00992	3.30533	0.00355546	0.272497	-1.75303
SLITRK4	0.353252	0.353252	3.30381	0.00356784	0.272497	-1.75609
SPTLC3	0.340931	0.340931	3.29942	0.00360387	0.273253	-1.76494
S100A11P1	0.267464	0.267464	3.29927	0.00360513	0.273253	-1.76525
LY96	0.600943	0.600943	3.29102	0.00367385	0.27575	-1.78188
CSGALNACT2	0.509352	0.509352	3.29072	0.0036764	0.27575	-1.78249
PLSCR4	0.389354	0.389354	3.28093	0.00375963	0.276151	-1.8022
SUSD6	0.340858	0.340858	3.27564	0.0038054	0.276151	-1.81285
NR2F1-AS1	0.583041	0.583041	3.27464	0.00381418	0.276151	-1.81488
DUXAP8	0.467631	0.467631	3.26183	0.00392746	0.282331	-1.84065
AASS	0.373111	0.373111	3.24491	0.00408229	0.28687	-1.87467
UBE2E2	0.436063	0.436063	3.24084	0.00412032	0.286972	-1.88283
IGFBP7	0.462446	0.462446	3.23658	0.00416066	0.28731	-1.8914
VEGFB	0.303745	0.303745	3.23595	0.00416658	0.28731	-1.89265
MSR1	0.413526	0.413526	3.22386	0.00428314	0.291617	-1.91693
CEP295NL	0.554676	0.554676	3.21331	0.00438743	0.295038	-1.93808
MYL9	0.557195	0.557195	3.20765	0.00444438	0.298134	-1.94942
GLI3	0.515835	0.515835	3.20196	0.00450227	0.29913	-1.9608
ETV1	0.524239	0.524239	3.20193	0.00450265	0.29913	-1.96088
PMEPA1	0.298691	0.298691	3.20049	0.00451744	0.29913	-1.96376
IFI16	0.492174	0.492174	3.19211	0.00460445	0.302918	-1.98053
CMTR2	0.352573	0.352573	3.18832	0.00464429	0.304073	-1.9881
GEM	0.316447	0.316447	3.18366	0.00469385	0.306582	-1.99743
THSD4	0.372293	0.372293	3.17483	0.004789	0.312051	-2.01507
MMP14	0.34784	0.34784	3.1712	0.00482872	0.313203	-2.02233
SRSF1P1	0.290782	0.290782	3.17073	0.00483387	0.313203	-2.02326
SNORD114-22	0.58921	0.58921	3.15436	0.0050171	0.316042	-2.05594
DCN	0.735779	0.735779	3.15375	0.005024	0.316042	-2.05715
PCDH7	0.615731	0.615731	3.15143	0.00505054	0.316042	-2.06178
NTM	0.277988	0.277988	3.15085	0.00505727	0.316042	-2.06295
IGF1R	0.272246	0.272246	3.14899	0.00507858	0.316565	-2.06664
TMEM47	0.340257	0.340257	3.14166	0.00516388	0.319692	-2.08127
DKK3	0.502414	0.502414	3.12928	0.00531087	0.324379	-2.10591
ESM1	0.394705	0.394705	3.12661	0.00534306	0.325408	-2.11121
LCA5	0.318016	0.318016	3.125	0.00536266	0.325408	-2.11443
TREML5P	0.242798	0.242798	3.1162	0.00547072	0.330446	-2.13194
MXRA8	0.543183	0.543183	3.10554	0.0056043	0.337023	-2.1531
SLC16A2	0.255147	0.255147	3.10286	0.00563847	0.338333	-2.15844
SSPN	0.65494	0.65494	3.10129	0.00565853	0.338452	-2.16155
SERPINE1	0.692016	0.692016	3.09601	0.0057265	0.338452	-2.17203
GADD45B	0.271763	0.271763	3.09218	0.0057763	0.33854	-2.17962
GLIPR2	0.274527	0.274527	3.09108	0.00579072	0.33854	-2.18181
CEACAMP11	0.318923	0.318923	3.08996	0.00580541	0.338547	-2.18403
PDLIM7	0.230326	0.230326	3.08824	0.00582805	0.338547	-2.18744
FAM168A	0.311558	0.311558	3.08726	0.00584093	0.338575	-2.18938
TM6SF1	0.327949	0.327949	3.08453	0.00587711	0.339272	-2.19479
MFAP5	0.505589	0.505589	3.0844	0.00587889	0.339272	-2.19506
CEP170	0.243755	0.243755	3.08269	0.00590158	0.339272	-2.19844
CHST15	0.422423	0.422423	3.07376	0.00602187	0.343952	-2.21613
SRPX2	0.564711	0.564711	3.0713	0.00605541	0.344301	-2.221
MMP2	0.542032	0.542032	3.06447	0.00614958	0.346667	-2.23452
SNORD93	0.53375	0.53375	3.06301	0.0061699	0.346667	-2.23741
PLOD2	0.314983	0.314983	3.05732	0.00624961	0.346892	-2.24866
BHLHE41	0.575931	0.575931	3.05644	0.00626196	0.346892	-2.25039
SH3PXD2B	0.335979	0.335979	3.05375	0.00630015	0.347488	-2.25572
ZNF542P	0.241736	0.241736	3.04613	0.00640933	0.350676	-2.27077
ABCC9	0.764869	0.764869	3.0442	0.00643725	0.3515	-2.27458
GRP	0.298593	0.298593	3.03937	0.00650763	0.353223	-2.28411
LRRC15	0.255318	0.255318	3.03439	0.00658104	0.355793	-2.29393
NOP14-AS1	0.252414	0.252414	3.02656	0.00669812	0.360694	-2.30937
EMP1	0.523847	0.523847	3.02368	0.00674177	0.362331	-2.31506
IDSP1	0.285234	0.285234	3.01867	0.00681813	0.363546	-2.32492
RBPMS2	0.313446	0.313446	3.01753	0.00683573	0.363546	-2.32718
TMEM130	0.308019	0.308019	3.01525	0.00687073	0.363546	-2.33165
BLOC1S6	0.282727	0.282727	3.01298	0.00690591	0.363986	-2.33612
RGS4	0.526066	0.526066	3.01213	0.00691923	0.363986	-2.3378
KIF26B	0.513799	0.513799	3.00592	0.00701644	0.366978	-2.35001
RRP7A	0.281237	0.281237	3.00347	0.00705524	0.367919	-2.35484
GJB2	0.471322	0.471322	3.00036	0.00710458	0.368763	-2.36094
LAMB2P1	0.233621	0.233621	2.99661	0.00716475	0.369044	-2.36831
CLDN11	0.386746	0.386746	2.99486	0.00719291	0.369044	-2.37175
CCDC80	0.675466	0.675466	2.99215	0.00723687	0.369044	-2.37708
TMEM39B	0.305609	0.305609	2.99205	0.0072385	0.369044	-2.37727
CDO1	0.25675	0.25675	2.99064	0.00726148	0.369186	-2.38005
LIX1L	0.33221	0.33221	2.98255	0.00739442	0.372934	-2.39591
C1S	0.55581	0.55581	2.98201	0.0074035	0.372934	-2.39699
SNORA11	0.323013	0.323013	2.97691	0.00748857	0.375143	-2.40698
MMP9	0.39184	0.39184	2.96845	0.00763197	0.379686	-2.42356
DYTN	0.266129	0.266129	2.96823	0.00763574	0.379686	-2.42399
MSLN	0.583348	0.583348	2.96747	0.00764879	0.379686	-2.42548
GABARAPL1	0.477859	0.477859	2.96401	0.00770829	0.381945	-2.43225
PRKD1	0.654251	0.654251	2.96302	0.00772537	0.382098	-2.43419
GOLGA8Q	0.32059	0.32059	2.9609	0.00776219	0.383225	-2.43834
IRAK3	0.34739	0.34739	2.9596	0.0077847	0.383594	-2.44088
GLI2	0.32913	0.32913	2.95885	0.00779777	0.383594	-2.44234
TCF4	0.473892	0.473892	2.95211	0.00791631	0.387808	-2.45552
MEF2D	0.239873	0.239873	2.95156	0.00792605	0.387808	-2.4566
LHX5-AS1	0.243261	0.243261	2.94974	0.00795844	0.388581	-2.46016
MEIS2	0.597497	0.597497	2.94553	0.00803374	0.389557	-2.46839
NRBP1	0.269922	0.269922	2.9438	0.00806487	0.389676	-2.47177
LBH	0.360942	0.360942	2.94177	0.00810159	0.389676	-2.47573
SH3D21	0.361711	0.361711	2.94148	0.00810695	0.389676	-2.47631
UFM1	0.265255	0.265255	2.93952	0.00814251	0.390304	-2.48013
ZCCHC24	0.270938	0.270938	2.93918	0.00814861	0.390304	-2.48079
ITGA5	0.591612	0.591612	2.92766	0.00836121	0.392456	-2.50328
FLNA	0.415098	0.415098	2.92613	0.00838981	0.392456	-2.50626
CCDC8	0.383683	0.383683	2.92569	0.00839802	0.392456	-2.50711
TRPC1	0.537618	0.537618	2.92019	0.00850181	0.393418	-2.51783
SERPINH1P1	0.28171	0.28171	2.91706	0.0085614	0.394723	-2.52393
IGKV2-38	0.228825	0.228825	2.91217	0.00865531	0.396097	-2.53345
SNORD113-1	0.725052	0.725052	2.90968	0.00870343	0.396875	-2.53829
ADAM12	0.729047	0.729047	2.90847	0.00872693	0.396906	-2.54064
DYDC1	0.274723	0.274723	2.90165	0.00886063	0.397773	-2.5539
GBP1P1	0.372237	0.372237	2.90081	0.00887725	0.397773	-2.55554
HMCN1	0.34746	0.34746	2.9003	0.00888732	0.397773	-2.55653
FOXCUT	0.236454	0.236454	2.89632	0.00896637	0.398697	-2.56425
MEDAG	0.768695	0.768695	2.89252	0.00904271	0.400136	-2.57164
CYP7B1	0.403815	0.403815	2.88015	0.00929497	0.405656	-2.59563
GREM1	0.438856	0.438856	2.87985	0.00930118	0.405656	-2.59622
PRMT2	0.265043	0.265043	2.87313	0.00944127	0.406758	-2.60924
DSEL	0.4724	0.4724	2.8713	0.00947973	0.406955	-2.61279
SNORD114-5	0.396268	0.396268	2.87058	0.00949491	0.406955	-2.61418
DSG4	0.242374	0.242374	2.86613	0.00958914	0.408813	-2.62279
FERMT2	0.403547	0.403547	2.85913	0.00973938	0.411409	-2.63633
ZMAT3	0.22801	0.22801	2.85866	0.00974953	0.411409	-2.63724
BLID	0.414951	0.414951	2.85697	0.00978619	0.411684	-2.6405
TNC	0.327086	0.327086	2.85481	0.00983328	0.411799	-2.64468
CLMP	0.289005	0.289005	2.85477	0.00983422	0.411799	-2.64477
CRMP1	0.385222	0.385222	2.85347	0.00986263	0.411799	-2.64728
AZIN2	0.338616	0.338616	2.84962	0.00994704	0.411799	-2.6547
CD59	0.28168	0.28168	2.83644	0.0102419	0.416728	-2.68013
DAB2	0.332845	0.332845	2.83371	0.010304	0.41677	-2.68539
VTRNA1-3	0.35161	0.35161	2.83065	0.0103742	0.416785	-2.6913
AXIN2	0.42971	0.42971	2.8305	0.0103777	0.416785	-2.69159
CUEDC1	0.193453	0.193453	2.82894	0.0104134	0.416785	-2.69458
CDKN2B	0.217092	0.217092	2.82862	0.0104209	0.416785	-2.6952
HECTD2	0.411831	0.411831	2.82796	0.0104361	0.416785	-2.69648
SS18L2P1	0.240534	0.240534	2.82562	0.0104904	0.416785	-2.70099
VIM	0.370096	0.370096	2.82518	0.0105004	0.416785	-2.70182
GMNC	0.24263	0.24263	2.82482	0.0105088	0.416785	-2.70252
JAG1	0.281569	0.281569	2.82344	0.010541	0.416785	-2.70518
MARK2P10	0.192679	0.192679	2.82007	0.0106199	0.417788	-2.71167
RBMS1	0.466292	0.466292	2.81917	0.0106411	0.417805	-2.7134
LRRC43	0.233984	0.233984	2.81237	0.0108022	0.421316	-2.72647
COL8A1	0.277812	0.277812	2.81035	0.0108505	0.421393	-2.73034
HTR2A	0.366254	0.366254	2.80733	0.0109233	0.421834	-2.73616
LAYN	0.327466	0.327466	2.80731	0.0109236	0.421834	-2.73618
IGLJCOR18	0.243394	0.243394	2.80107	0.0110752	0.424129	-2.74816
OTP	0.227426	0.227426	2.79985	0.011105	0.424129	-2.7505
SKI	0.341611	0.341611	2.79976	0.0111073	0.424129	-2.75068
CMTM3	0.417323	0.417323	2.79498	0.011225	0.425643	-2.75984
EGFLAM-AS1	0.189965	0.189965	2.7924	0.0112891	0.425643	-2.76479
VASH1	0.233759	0.233759	2.7918	0.0113041	0.425643	-2.76594
ISM1	0.333523	0.333523	2.79107	0.0113222	0.425643	-2.76733
SIGLEC9	0.197575	0.197575	2.79065	0.0113328	0.425643	-2.76815
FBLN5	0.436706	0.436706	2.78908	0.011372	0.425643	-2.77115
ZNF423	0.287009	0.287009	2.78809	0.0113968	0.425643	-2.77304
TBX2-AS1	0.228662	0.228662	2.78755	0.0114105	0.425643	-2.77408
EPS8L1	0.252164	0.252164	2.78631	0.0114417	0.425643	-2.77645
EPYC	0.986715	0.986715	2.78625	0.0114432	0.425643	-2.77656
WDR72	0.267435	0.267435	2.78471	0.0114822	0.426514	-2.77952
HYDIN2	0.456866	0.456866	2.78383	0.0115046	0.426703	-2.78121
NEXN	0.48812	0.48812	2.78145	0.011565	0.426703	-2.78576
TUB	0.242768	0.242768	2.77707	0.0116771	0.427003	-2.79414
TRAJ45	0.384428	0.384428	2.77694	0.0116804	0.427003	-2.79438
PHTF2	0.296364	0.296364	2.77396	0.0117572	0.427008	-2.80008
SLFN11	0.270792	0.270792	2.7738	0.0117614	0.427008	-2.80039
MB21D2	0.293175	0.293175	2.77084	0.0118384	0.427733	-2.80605
TNS3	0.351342	0.351342	2.76728	0.0119316	0.427733	-2.81285
MEG3	0.472356	0.472356	2.7672	0.0119336	0.427733	-2.813
BORCS6	0.256824	0.256824	2.76703	0.0119381	0.427733	-2.81333
PDIA2	0.230834	0.230834	2.76636	0.0119556	0.427799	-2.8146
SUCNR1	0.249581	0.249581	2.76027	0.0121168	0.428973	-2.82623
PARD6G	0.258196	0.258196	2.75821	0.0121718	0.428973	-2.83015
RPS20P22	0.270085	0.270085	2.75818	0.0121726	0.428973	-2.83021
ZNF32-AS2	0.214941	0.214941	2.7576	0.0121881	0.428973	-2.83132
SLC16A4	0.395745	0.395745	2.75607	0.0122292	0.428973	-2.83424
SMARCA1	0.231682	0.231682	2.75586	0.0122349	0.428973	-2.83464
NUAK1	0.400976	0.400976	2.75529	0.0122501	0.428973	-2.83572
SNORD113-6	0.435416	0.435416	2.75377	0.0122912	0.428973	-2.83862
STX16-NPEPL1	0.247764	0.247764	2.75316	0.0123076	0.428973	-2.83978
LRP1	0.369448	0.369448	2.75259	0.0123231	0.428973	-2.84087
PHC2	0.264066	0.264066	2.75201	0.0123389	0.428973	-2.84198
LCE3D	0.254162	0.254162	2.75178	0.012345	0.428973	-2.84241
C5AR1	0.283235	0.283235	2.75006	0.0123916	0.428973	-2.84568
ADAMTS9-AS2	0.381272	0.381272	2.74304	0.0125841	0.428973	-2.85905
GLIPR1	0.371097	0.371097	2.74271	0.0125933	0.428973	-2.85969
PMP22	0.350444	0.350444	2.74113	0.012637	0.428973	-2.86269
IGFL2	0.335486	0.335486	2.74066	0.01265	0.428973	-2.86358
TDO2	0.326638	0.326638	2.74019	0.0126632	0.428973	-2.86448
HYI	0.217073	0.217073	2.73889	0.0126994	0.428973	-2.86696
CNN3	0.437728	0.437728	2.73288	0.0128678	0.432657	-2.87838
CSRP1	0.300474	0.300474	2.73209	0.0128901	0.432872	-2.87988
ADGRF5	0.386093	0.386093	2.72695	0.013036	0.434408	-2.88963
DACT1	0.274942	0.274942	2.72689	0.0130379	0.434408	-2.88976
SIN3B	0.261386	0.261386	2.72563	0.0130739	0.434408	-2.89215
ZC2HC1A	0.39209	0.39209	2.72469	0.0131008	0.434408	-2.89393
COQ5	0.235396	0.235396	2.72373	0.0131283	0.434408	-2.89575
UBE2Q2P1	0.265097	0.265097	2.72331	0.0131405	0.434408	-2.89655
ASPN	0.82237	0.82237	2.72269	0.0131583	0.434408	-2.89772
VCL	0.367302	0.367302	2.72268	0.0131586	0.434408	-2.89774
CC2D2A	0.331948	0.331948	2.71756	0.013307	0.438776	-2.90746
OR52E3P	0.274835	0.274835	2.71679	0.0133294	0.438987	-2.90892
AP4M1	0.195198	0.195198	2.71361	0.0134225	0.439928	-2.91494
ISLR	0.29858	0.29858	2.71176	0.0134769	0.440032	-2.91845
IL1RAP	0.241239	0.241239	2.7097	0.0135378	0.440336	-2.92235
CST4	0.65916	0.65916	2.70332	0.0137277	0.441785	-2.93441
ACVR1	0.319189	0.319189	2.69454	0.0139936	0.447369	-2.95102
ROR2	0.424918	0.424918	2.69036	0.0141218	0.449779	-2.9589
TVP23CP1	0.305471	0.305471	2.68994	0.0141349	0.449779	-2.95971
APOD	0.891233	0.891233	2.68528	0.0142792	0.452746	-2.9685
MSC	0.26765	0.26765	2.68219	0.0143758	0.454159	-2.97433
CST1	0.976623	0.976623	2.68175	0.0143897	0.454159	-2.97516
CDH2	0.328559	0.328559	2.67893	0.0144783	0.455401	-2.98047
MAB21L2	0.505104	0.505104	2.67569	0.0145808	0.456173	-2.98657
F2R	0.278966	0.278966	2.67547	0.0145878	0.456173	-2.98699
LRRC23	0.252519	0.252519	2.67511	0.0145992	0.456173	-2.98766
OR2T7	0.281516	0.281516	2.67499	0.0146031	0.456173	-2.9879
PRR16	0.351683	0.351683	2.67134	0.0147198	0.4572	-2.99477
LRRC17	0.675415	0.675415	2.67061	0.0147431	0.457406	-2.99614
ATXN3	0.264257	0.264257	2.67001	0.0147625	0.457486	-2.99728
WDR44	0.298847	0.298847	2.66941	0.0147817	0.457563	-2.9984
PREX1	0.421158	0.421158	2.66804	0.0148259	0.457892	-3.00098
SSH1	0.205841	0.205841	2.66695	0.0148611	0.457933	-3.00303
RUNX2	0.301096	0.301096	2.666	0.0148917	0.457933	-3.00481
SCN4A	0.260858	0.260858	2.66016	0.0150822	0.461112	-3.01579
PKNOX1	0.276833	0.276833	2.65415	0.0152806	0.464579	-3.02708
TMEM256P2	0.218688	0.218688	2.64983	0.0154246	0.466134	-3.03518
PDGFRA	0.501698	0.501698	2.64982	0.0154252	0.466134	-3.03521
MAP7D3	0.377888	0.377888	2.64904	0.0154513	0.466134	-3.03668
B3GNT6	0.212313	0.212313	2.64512	0.0155832	0.469075	-3.04401
LAPTM5	0.342402	0.342402	2.64371	0.0156311	0.47	-3.04666
UBTFL10	0.248574	0.248574	2.63772	0.0158356	0.471644	-3.05789
RHOB	0.257073	0.257073	2.63762	0.0158391	0.471644	-3.05807
SNORD114-9	0.239929	0.239929	2.63695	0.015862	0.471644	-3.05932
COL6A1	0.517045	0.517045	2.63605	0.0158931	0.471644	-3.06101
KANK2	0.241644	0.241644	2.62797	0.0161739	0.47481	-3.07613
ARHGAP31	0.332526	0.332526	2.62748	0.016191	0.47481	-3.07704
SNORD114-4	0.214124	0.214124	2.62559	0.0162574	0.475223	-3.08056
MMP7	0.428491	0.428491	2.61412	0.0166662	0.482301	-3.10198
SNORA7B	0.217103	0.217103	2.61153	0.0167595	0.482301	-3.1068
YAP1	0.281837	0.281837	2.60787	0.0168929	0.483497	-3.11363
HCG4P3	0.209822	0.209822	2.60532	0.0169861	0.484593	-3.11837
RARG	0.341155	0.341155	2.60137	0.0171318	0.485199	-3.12572
DMXL2	0.252612	0.252612	2.60058	0.017161	0.485524	-3.1272
GALNS	0.317568	0.317568	2.59891	0.0172229	0.486672	-3.13029
SCAMP4	0.228886	0.228886	2.59853	0.0172373	0.486672	-3.13101
NRP1	0.300115	0.300115	2.59513	0.0173642	0.487953	-3.13733
TDGF1P1	0.180503	0.180503	2.59155	0.0174986	0.488805	-3.14397
OR2I1P	0.209653	0.209653	2.58879	0.017603	0.489178	-3.1491
GYPC	0.289906	0.289906	2.5874	0.0176561	0.489178	-3.15169
GLT8D2	0.579857	0.579857	2.58645	0.0176922	0.489178	-3.15345
SS18L2P2	0.219231	0.219231	2.58619	0.0177023	0.489178	-3.15394
FNBP1	0.274315	0.274315	2.58231	0.0178508	0.490797	-3.16113
RNF180	0.293768	0.293768	2.58153	0.0178807	0.491125	-3.16257
GABBR1	0.28727	0.28727	2.57635	0.0180815	0.494216	-3.17218
FMNL3	0.28677	0.28677	2.57478	0.0181428	0.494216	-3.17509
SORCS2	0.220237	0.220237	2.57319	0.0182047	0.494216	-3.17802
SKIL	0.439017	0.439017	2.57259	0.0182285	0.494216	-3.17915
EML1	0.301219	0.301219	2.57022	0.0183217	0.495222	-3.18353
AHNAK2	0.503922	0.503922	2.5688	0.0183775	0.495222	-3.18614
CD99	0.273092	0.273092	2.56844	0.018392	0.495222	-3.18682
PDLIM3	0.253456	0.253456	2.56761	0.0184248	0.495222	-3.18836
PTPRU	0.333487	0.333487	2.5675	0.0184289	0.495222	-3.18855
ITGAV	0.273804	0.273804	2.56504	0.0185269	0.49639	-3.19311
EMP3	0.372146	0.372146	2.5622	0.0186403	0.496704	-3.19835
OMD	0.513795	0.513795	2.56207	0.0186454	0.496704	-3.19859
SWAP70	0.266081	0.266081	2.56201	0.0186478	0.496704	-3.1987
GYG1P3	0.221175	0.221175	2.56048	0.0187093	0.496746	-3.20153
PACS1	0.206112	0.206112	2.55932	0.0187559	0.496746	-3.20367
ACKR3	0.347641	0.347641	2.55734	0.0188359	0.497328	-3.20733
CDY12P	0.262959	0.262959	2.55594	0.0188928	0.497328	-3.20992
GXYLT2	0.565416	0.565416	2.55556	0.018908	0.497328	-3.21061
PRG4	0.349379	0.349379	2.5519	0.0190572	0.499258	-3.21737
ZGLP1	0.246095	0.246095	2.55016	0.0191285	0.500236	-3.22058
CMAHP	0.272493	0.272493	2.54429	0.0193711	0.502867	-3.2314
GAS1	0.225153	0.225153	2.54119	0.0195	0.503788	-3.2371
NLGN2	0.269468	0.269468	2.54109	0.0195042	0.503788	-3.23728
SNORD113-2	0.597199	0.597199	2.53967	0.0195636	0.503854	-3.2399
ADAMTS6	0.307757	0.307757	2.53955	0.0195687	0.503854	-3.24012
MN1	0.220064	0.220064	2.53721	0.0196673	0.504111	-3.24444
MYADM	0.250645	0.250645	2.53669	0.0196892	0.504111	-3.24539
GNAI2P1	0.315881	0.315881	2.53308	0.0198421	0.504111	-3.25203
PALLD	0.492542	0.492542	2.52822	0.0200493	0.504332	-3.26095
YPEL3	0.291443	0.291443	2.52642	0.0201269	0.504332	-3.26426
KRT8P25	0.181686	0.181686	2.52641	0.0201271	0.504332	-3.26427
DUSP10	0.372434	0.372434	2.52488	0.0201931	0.504332	-3.26708
SLCO2B1	0.33375	0.33375	2.52376	0.0202416	0.504332	-3.26914
ANXA5	0.454724	0.454724	2.52323	0.0202645	0.504332	-3.27011
SNORD113-3	0.440958	0.440958	2.52321	0.0202655	0.504332	-3.27015
C3AR1	0.3709	0.3709	2.52272	0.0202868	0.504332	-3.27105
SALL4	0.246331	0.246331	2.52212	0.0203126	0.504332	-3.27214
ARL8A	0.239082	0.239082	2.52025	0.0203942	0.504332	-3.27558
DPEP1	0.215215	0.215215	2.52018	0.020397	0.504332	-3.2757
SNORD114-20	0.529426	0.529426	2.51984	0.020412	0.504332	-3.27633
PGM5-AS1	0.203807	0.203807	2.51819	0.020484	0.505548	-3.27935
EBF4	0.244425	0.244425	2.51745	0.0205163	0.505548	-3.2807
HOMER1	0.307979	0.307979	2.51215	0.0207501	0.508724	-3.29042
KCND2	0.327399	0.327399	2.50898	0.0208911	0.508897	-3.29623
MDH2	0.196206	0.196206	2.50627	0.021012	0.510226	-3.30117
TRIB2	0.304038	0.304038	2.49967	0.0213101	0.512784	-3.31324
SLIT2-IT1	0.220202	0.220202	2.49884	0.0213477	0.512784	-3.31475
NAP1L3	0.23577	0.23577	2.49774	0.0213979	0.512784	-3.31676
COMP	0.263038	0.263038	2.49625	0.021466	0.512784	-3.31948
ANKRD6	0.356226	0.356226	2.49383	0.0215771	0.51315	-3.32391
SPIN3	0.192291	0.192291	2.4928	0.0216241	0.513373	-3.32577
OR8X1P	0.231401	0.231401	2.49111	0.0217022	0.513373	-3.32886
COL2A1	0.257382	0.257382	2.49036	0.0217369	0.513373	-3.33023
THOC7-AS1	0.25352	0.25352	2.48545	0.0219654	0.515205	-3.33918
CLIC4P3	0.233462	0.233462	2.48316	0.0220725	0.516499	-3.34334
LMO7-AS1	0.389292	0.389292	2.48224	0.0221156	0.51651	-3.34501
HSPG2	0.311419	0.311419	2.47935	0.022252	0.518139	-3.35028
ITGB1	0.267047	0.267047	2.4791	0.0222639	0.518139	-3.35073
OLR1	0.436056	0.436056	2.47771	0.0223298	0.518455	-3.35326
HOTAIRM1	0.310712	0.310712	2.47767	0.0223318	0.518455	-3.35334
VN1R74P	0.261129	0.261129	2.47332	0.0225391	0.520058	-3.36125
AQP9	0.249974	0.249974	2.47246	0.02258	0.520058	-3.3628
VSX2	0.158805	0.158805	2.47223	0.0225914	0.520058	-3.36323
LXN	0.459171	0.459171	2.47121	0.0226402	0.520058	-3.36507
TRABD2A	0.225388	0.225388	2.46814	0.0227884	0.520058	-3.37065
FNDC1-IT1	0.413281	0.413281	2.46813	0.0227886	0.520058	-3.37066
PPT1	0.272939	0.272939	2.46741	0.0228236	0.520058	-3.37197
TMEM38A	0.215274	0.215274	2.46552	0.0229152	0.520058	-3.3754
TUBB4BP4	0.223631	0.223631	2.46474	0.0229534	0.520494	-3.37682
SPATA31B1P	0.236097	0.236097	2.46254	0.0230607	0.521101	-3.38081
HECTD2-AS1	0.22453	0.22453	2.46085	0.0231435	0.521339	-3.38387
IGKV2D-38	0.194641	0.194641	2.46032	0.0231695	0.521496	-3.38483
EFEMP1	0.714735	0.714735	2.45909	0.02323	0.521966	-3.38706
PPP1R14A	0.225901	0.225901	2.45488	0.0234384	0.522216	-3.3947
DPYSL3	0.322847	0.322847	2.45443	0.0234606	0.522216	-3.3955
GJA1	0.231708	0.231708	2.4544	0.0234618	0.522216	-3.39555
NPHP4	0.225899	0.225899	2.45415	0.0234747	0.522216	-3.39602
PCOLCE	0.227962	0.227962	2.45242	0.0235608	0.522386	-3.39914
OPTN	0.216212	0.216212	2.44991	0.0236864	0.522843	-3.40369
GLIS3	0.409064	0.409064	2.4499	0.0236867	0.522843	-3.4037
RBMS1P1	0.296013	0.296013	2.44838	0.0237633	0.52347	-3.40646
RSPH10B2	0.209605	0.209605	2.44576	0.0238951	0.524146	-3.41118
EPHX1	0.28915	0.28915	2.44483	0.0239424	0.524198	-3.41287
TFEC	0.492384	0.492384	2.44079	0.024148	0.524974	-3.42017
G6PD	0.202523	0.202523	2.43995	0.0241909	0.524974	-3.42168
MYH9	0.245391	0.245391	2.43956	0.0242104	0.524974	-3.42237
HMX3	0.203953	0.203953	2.43827	0.0242765	0.524974	-3.4247
FAM78B	0.251323	0.251323	2.4377	0.0243061	0.524974	-3.42574
EIF4A2P2	0.205116	0.205116	2.43626	0.02438	0.524974	-3.42833
C1orf162	0.379588	0.379588	2.43476	0.0244575	0.524974	-3.43104
TRIO	0.236807	0.236807	2.43415	0.024489	0.524974	-3.43214
CPXM1	0.376706	0.376706	2.43353	0.0245214	0.524974	-3.43327
RGN	0.208317	0.208317	2.43324	0.0245361	0.524974	-3.43378
LTBP1	0.218234	0.218234	2.43275	0.0245615	0.524974	-3.43466
TMEM14DP	0.226723	0.226723	2.43113	0.0246459	0.524974	-3.43759
LONRF1	0.233457	0.233457	2.43108	0.0246482	0.524974	-3.43767
TPM4P1	0.211691	0.211691	2.43083	0.0246616	0.524974	-3.43813
ITPRIP	0.197653	0.197653	2.4295	0.0247305	0.524974	-3.44051
RBMS2	0.298716	0.298716	2.4292	0.0247462	0.524974	-3.44105
HAND2	0.234832	0.234832	2.42902	0.0247555	0.524974	-3.44137
OR10J4	0.260267	0.260267	2.42675	0.0248748	0.525644	-3.44547
HTR2B	0.315617	0.315617	2.42605	0.0249113	0.525977	-3.44672
PALMD	0.444955	0.444955	2.42546	0.0249426	0.525977	-3.4478
GDI1	0.216711	0.216711	2.42498	0.0249676	0.525977	-3.44865
ADPRH	0.306034	0.306034	2.41713	0.0253844	0.531477	-3.46277
PRR20FP	0.247873	0.247873	2.41626	0.0254308	0.531792	-3.46432
RPS16P5	0.262331	0.262331	2.41605	0.0254421	0.531792	-3.4647
SLC35E4	0.197987	0.197987	2.41127	0.0256996	0.534967	-3.47328
PDGFRL	0.296591	0.296591	2.40573	0.0260012	0.53707	-3.48323
A4GALT	0.261243	0.261243	2.40561	0.0260078	0.53707	-3.48344
SLC2A3	0.455624	0.455624	2.40267	0.0261692	0.537546	-3.48871
LTBP2	0.236241	0.236241	2.40177	0.0262186	0.537546	-3.49032
YIPF3	0.27893	0.27893	2.40164	0.0262256	0.537546	-3.49054
GTF2F2P1	0.193104	0.193104	2.39809	0.0264224	0.539554	-3.49691
ECM2	0.287863	0.287863	2.3957	0.026555	0.539635	-3.50117
PBRM1	0.195243	0.195243	2.39553	0.0265647	0.539635	-3.50148
DMRTC2	0.198517	0.198517	2.39477	0.0266071	0.539693	-3.50284
PDGFRB	0.243149	0.243149	2.39442	0.026627	0.539696	-3.50348
FZD7	0.32209	0.32209	2.3934	0.0266841	0.539847	-3.5053
BRF1	0.18917	0.18917	2.38762	0.0270096	0.543351	-3.51562
ALPK3	0.228329	0.228329	2.38698	0.0270461	0.543351	-3.51677
BMPR2	0.209951	0.209951	2.38311	0.0272661	0.543596	-3.52366
SNRPFP3	0.232115	0.232115	2.37937	0.0274811	0.545802	-3.53034
FAM20C	0.306552	0.306552	2.379	0.0275019	0.545802	-3.53098
CALU	0.203731	0.203731	2.37762	0.0275821	0.546353	-3.53346
TP53INP2	0.201972	0.201972	2.37658	0.027642	0.546353	-3.5353
INPP5F	0.297505	0.297505	2.37599	0.0276759	0.546353	-3.53634
CLIC2	0.213269	0.213269	2.37388	0.0277987	0.547505	-3.54011
MAGEL2	0.223316	0.223316	2.37263	0.0278716	0.547505	-3.54233
SOX4	0.236593	0.236593	2.37125	0.0279524	0.547505	-3.54479
FAT4	0.275755	0.275755	2.37113	0.0279591	0.547505	-3.545
TRAJ23	0.217655	0.217655	2.36949	0.0280555	0.547945	-3.54792
WBP1L	0.310597	0.310597	2.36915	0.0280753	0.547945	-3.54852
SMIM10	0.281504	0.281504	2.3686	0.0281076	0.547945	-3.5495
ITGB5	0.358906	0.358906	2.36637	0.0282392	0.549091	-3.55347
CNTLN	0.255562	0.255562	2.36621	0.0282484	0.549091	-3.55375
IFNA12P	0.275261	0.275261	2.36453	0.0283478	0.549091	-3.55673
TTLL8	0.229282	0.229282	2.36419	0.0283681	0.549091	-3.55734
BTK	0.261795	0.261795	2.36324	0.0284244	0.549091	-3.55902
ATXN7L1	0.203839	0.203839	2.36259	0.0284632	0.549091	-3.56018
AQP1	0.28657	0.28657	2.36029	0.0286002	0.549091	-3.56426
ARMCX3	0.246059	0.246059	2.35701	0.028797	0.549091	-3.57008
ZDBF2	0.319417	0.319417	2.35443	0.0289523	0.549374	-3.57465
TEAD2	0.258523	0.258523	2.35368	0.0289978	0.549527	-3.57598
ZNF521	0.258132	0.258132	2.35196	0.029102	0.549527	-3.57903
AGAP2	0.255535	0.255535	2.35175	0.029115	0.549527	-3.5794
ITGA11	0.273266	0.273266	2.35155	0.0291271	0.549527	-3.57976
TRBV4-1	0.257616	0.257616	2.35117	0.02915	0.549527	-3.58042
TNFAIP8	0.224406	0.224406	2.35115	0.0291513	0.549527	-3.58046
CHRFAM7A	0.226675	0.226675	2.35111	0.0291539	0.549527	-3.58054
C8orf48	0.239452	0.239452	2.35093	0.029165	0.549527	-3.58086
VEGFC	0.25586	0.25586	2.34863	0.029305	0.550663	-3.58492
LRRC8E	0.28131	0.28131	2.34757	0.0293697	0.550663	-3.58679
MCEMP1	0.218353	0.218353	2.34754	0.0293719	0.550663	-3.58686
ADCY4	0.23725	0.23725	2.34743	0.0293782	0.550663	-3.58704
TUSC3	0.382463	0.382463	2.34453	0.0295567	0.551062	-3.59218
CHST11	0.384498	0.384498	2.34406	0.0295858	0.551062	-3.59301
KDR	0.269285	0.269285	2.34188	0.0297203	0.553118	-3.59686
TMC8	0.205588	0.205588	2.33762	0.0299852	0.555329	-3.60439
SNORD94	0.21471	0.21471	2.33549	0.0301186	0.556359	-3.60815
PLGLA	0.215953	0.215953	2.33511	0.030142	0.556414	-3.60881
MAFF	0.213183	0.213183	2.33452	0.0301791	0.556722	-3.60985
FILIP1L	0.394653	0.394653	2.33392	0.0302167	0.557041	-3.61091
C22orf15	0.218348	0.218348	2.33321	0.0302615	0.557489	-3.61216
TPM4	0.226421	0.226421	2.33232	0.0303177	0.558065	-3.61374
RPL21P122	0.180669	0.180669	2.33099	0.0304021	0.558065	-3.61609
CCL2	0.314387	0.314387	2.3297	0.0304838	0.558065	-3.61836
HMGN1P13	0.181668	0.181668	2.32852	0.0305583	0.558065	-3.62043
PSKH1	0.162839	0.162839	2.32751	0.0306225	0.558065	-3.62221
SNORD67	0.244638	0.244638	2.32723	0.0306405	0.558065	-3.62271
EPHB1	0.219615	0.219615	2.32716	0.0306449	0.558065	-3.62283
VN2R9P	0.21121	0.21121	2.32622	0.0307049	0.558065	-3.62449
FLJ42393	0.247083	0.247083	2.32584	0.0307288	0.558065	-3.62515
CSPG4P10	0.230032	0.230032	2.32523	0.0307682	0.558065	-3.62623
AFAP1L1	0.187443	0.187443	2.32445	0.0308178	0.558065	-3.6276
FBXO27	0.210469	0.210469	2.3227	0.0309305	0.558065	-3.63069
CCDC144NL-AS1	0.291717	0.291717	2.32229	0.0309566	0.558065	-3.6314
DPYD	0.44027	0.44027	2.32217	0.0309645	0.558065	-3.63162
CHST10	0.239456	0.239456	2.32202	0.0309738	0.558065	-3.63187
PTTG1IP	0.219264	0.219264	2.32168	0.0309961	0.558065	-3.63248
PKD2	0.240062	0.240062	2.3195	0.0311364	0.558065	-3.63631
BACE1	0.198251	0.198251	2.31932	0.0311479	0.558065	-3.63662
CLCP2	0.203327	0.203327	2.31815	0.0312236	0.558065	-3.63868
B3GALNT1	0.220193	0.220193	2.3173	0.0312793	0.558065	-3.64018
RPS3AP52	0.197913	0.197913	2.31688	0.0313061	0.558065	-3.64091
CYGB	0.199055	0.199055	2.31621	0.0313496	0.558065	-3.64209
RNF130	0.260076	0.260076	2.31477	0.0314433	0.558065	-3.64461
OR1D5	0.205748	0.205748	2.3135	0.0315264	0.558065	-3.64685
TSPAN9	0.320377	0.320377	2.31155	0.0316546	0.558889	-3.65028
PLXND1	0.244421	0.244421	2.31134	0.031668	0.558889	-3.65064
LAMB3	0.262948	0.262948	2.30784	0.0318986	0.561505	-3.65678
AJUBA	0.282609	0.282609	2.30606	0.0320163	0.562852	-3.65989
PNMA6B	0.216142	0.216142	2.30531	0.0320663	0.563097	-3.66121
C4orf17	0.211649	0.211649	2.30091	0.0323601	0.566344	-3.66893
PSMC1P4	0.227887	0.227887	2.29998	0.0324223	0.566713	-3.67055
TBL1X	0.357155	0.357155	2.29985	0.0324312	0.566713	-3.67078
SLED1	0.267984	0.267984	2.29935	0.0324643	0.566713	-3.67164
P3H1	0.222399	0.222399	2.2987	0.0325083	0.566758	-3.67279
OR4D10	0.179667	0.179667	2.29748	0.0325904	0.567481	-3.67492
RASSF8	0.186928	0.186928	2.29747	0.0325914	0.567481	-3.67495
IGHG4	0.772854	0.772854	2.2965	0.0326565	0.568252	-3.67664
SLC5A4P1	0.186681	0.186681	2.29238	0.0329357	0.569689	-3.68383
CD200	0.626195	0.626195	2.29131	0.0330086	0.569689	-3.6857
USP9YP30	0.216338	0.216338	2.28994	0.0331024	0.569689	-3.6881
HCG15	0.222475	0.222475	2.28948	0.0331339	0.569689	-3.6889
ZNF333	0.17522	0.17522	2.28946	0.0331355	0.569689	-3.68894
TUSC7	0.228898	0.228898	2.28662	0.0333304	0.571039	-3.6939
COL4A1	0.185376	0.185376	2.28624	0.0333566	0.571039	-3.69456
C1orf159	0.216873	0.216873	2.28513	0.0334331	0.571039	-3.69649
TP53BP2	0.212731	0.212731	2.28443	0.0334814	0.571039	-3.69771
IPMKP1	0.196534	0.196534	2.28263	0.0336059	0.571039	-3.70085
LDB2	0.247819	0.247819	2.2818	0.0336633	0.571189	-3.70229
AP1M1	0.172263	0.172263	2.28095	0.0337225	0.571275	-3.70377
PRAMEF14	0.247002	0.247002	2.28085	0.03373	0.571275	-3.70396
CCDC88A	0.31272	0.31272	2.27858	0.0338881	0.572801	-3.70791
TXNRD3	0.284442	0.284442	2.27146	0.0343893	0.577874	-3.7203
SHOX2	0.344218	0.344218	2.27102	0.0344201	0.577874	-3.72105
GPX1P1	0.20716	0.20716	2.26834	0.034611	0.579282	-3.72572
TRMT112P4	0.181737	0.181737	2.26626	0.034759	0.579282	-3.72932
PAM	0.315254	0.315254	2.26548	0.0348149	0.579282	-3.73067
TRNT1	0.185969	0.185969	2.26439	0.0348932	0.579473	-3.73257
MARK2P17	0.177828	0.177828	2.26364	0.034947	0.580014	-3.73387
MYCBPAP	0.218441	0.218441	2.2609	0.0351445	0.581162	-3.73862
EN1	0.195979	0.195979	2.25872	0.0353026	0.582053	-3.7424
CNN2P10	0.189086	0.189086	2.25834	0.0353303	0.582103	-3.74306
ZMIZ1	0.317511	0.317511	2.25807	0.0353501	0.582103	-3.74353
TRPC2	0.210044	0.210044	2.25735	0.0354025	0.582507	-3.74478
GPR183	0.435097	0.435097	2.25449	0.0356111	0.583586	-3.74973
EFEMP2	0.302961	0.302961	2.25383	0.0356588	0.584018	-3.75086
SULT6B1	0.167926	0.167926	2.25354	0.0356803	0.584019	-3.75137
SRGAP3	0.24226	0.24226	2.25185	0.0358043	0.585698	-3.75429
SEC61A1	0.200376	0.200376	2.25129	0.0358453	0.586018	-3.75526
CCDC85B	0.184999	0.184999	2.25037	0.0359136	0.586432	-3.75686
GSTM3	0.297711	0.297711	2.24869	0.0360374	0.587049	-3.75976
DPY19L2P5	0.190118	0.190118	2.24794	0.0360929	0.587069	-3.76105
KLF3-AS1	0.334462	0.334462	2.24771	0.03611	0.587069	-3.76145
MCHR2-AS1	0.165056	0.165056	2.24567	0.0362612	0.587276	-3.76497
MRC2	0.214204	0.214204	2.24531	0.036288	0.587276	-3.76559
IGHVII-60-1	0.183442	0.183442	2.2438	0.0364007	0.587897	-3.76821
SNORD114-14	0.692001	0.692001	2.24345	0.0364265	0.587897	-3.7688
SNORA14B	0.217557	0.217557	2.24335	0.036434	0.587897	-3.76897
STEAP4	0.422355	0.422355	2.24275	0.0364791	0.587905	-3.77001
PLCXD3	0.211144	0.211144	2.24062	0.0366388	0.58888	-3.77369
EMCN	0.301177	0.301177	2.24019	0.0366709	0.58888	-3.77443
LAMB1	0.354367	0.354367	2.24016	0.036673	0.58888	-3.77448
SMOC1	0.276682	0.276682	2.23756	0.0368692	0.589622	-3.77897
IFNE	0.480314	0.480314	2.23684	0.0369233	0.589622	-3.7802
TBC1D3G	0.178057	0.178057	2.2367	0.0369345	0.589622	-3.78046
IBSP	0.184613	0.184613	2.23648	0.0369512	0.589622	-3.78084
SP140	0.198529	0.198529	2.23392	0.0371448	0.592018	-3.78523
MTND2P11	0.203796	0.203796	2.23158	0.0373237	0.592286	-3.78927
TPM2	0.208598	0.208598	2.22947	0.0374845	0.592286	-3.79289
FNDC3B	0.237198	0.237198	2.22881	0.0375358	0.592286	-3.79404
SLAMF8	0.178202	0.178202	2.22811	0.0375895	0.592286	-3.79524
ADAM19	0.177446	0.177446	2.22732	0.0376502	0.592286	-3.7966
BCDIN3D-AS1	0.231415	0.231415	2.22701	0.0376743	0.592286	-3.79714
PEA15	0.305636	0.305636	2.22695	0.0376785	0.592286	-3.79723
PXDC1	0.376584	0.376584	2.22593	0.0377572	0.59233	-3.79899
CGB7	0.188289	0.188289	2.22389	0.0379151	0.592874	-3.80249
MTND2P16	0.239852	0.239852	2.22315	0.037972	0.593424	-3.80375
HSFY6P	0.226025	0.226025	2.2225	0.0380228	0.593538	-3.80488
EVC2	0.186391	0.186391	2.2205	0.0381781	0.594219	-3.8083
DCHS1	0.307057	0.307057	2.22001	0.0382168	0.594219	-3.80915
OSBP2	0.235903	0.235903	2.21767	0.0383999	0.595392	-3.81317
RPL7AP56	0.195273	0.195273	2.21655	0.038488	0.596014	-3.81509
SRGAP2D	0.240982	0.240982	2.21389	0.038697	0.597601	-3.81964
BNIP3P16	0.167001	0.167001	2.21387	0.038699	0.597601	-3.81968
PPP4R1-AS1	0.175743	0.175743	2.21297	0.0387699	0.597964	-3.82122
BBS9	0.282559	0.282559	2.21267	0.0387931	0.597964	-3.82173
TLE6	0.186497	0.186497	2.21091	0.0389327	0.598034	-3.82474
NALCN-AS1	0.185054	0.185054	2.21075	0.038946	0.598034	-3.82503
ZNF341-AS1	0.172988	0.172988	2.20841	0.039132	0.599205	-3.82903
AMD1P1	0.21596	0.21596	2.20725	0.0392241	0.600279	-3.831
ARHGEF25	0.236237	0.236237	2.20638	0.0392938	0.600687	-3.83249
FOXN3-AS2	0.212701	0.212701	2.20082	0.0397411	0.60386	-3.84199
RFPL4AP3	0.204115	0.204115	2.20058	0.0397611	0.60386	-3.84241
SNORD114-1	0.193313	0.193313	2.19972	0.0398306	0.604478	-3.84388
ALDH1L1-AS2	0.231486	0.231486	2.19899	0.0398899	0.605041	-3.84512
TOM1	0.252287	0.252287	2.19602	0.0401314	0.606541	-3.85019
TIGD6	0.244912	0.244912	2.19548	0.0401754	0.606618	-3.8511
ITGB1P1	0.252285	0.252285	2.19516	0.0402015	0.606618	-3.85165
JAM2	0.355887	0.355887	2.19498	0.0402161	0.606618	-3.85195
TMEM158	0.196724	0.196724	2.19227	0.0404389	0.609306	-3.85658
RPL9P16	0.265207	0.265207	2.19062	0.0405746	0.609668	-3.85939
FTLP2	0.225891	0.225891	2.18995	0.0406293	0.609826	-3.86052
C1QB	0.251433	0.251433	2.18968	0.0406521	0.609826	-3.86099
IDS	0.30795	0.30795	2.18903	0.0407053	0.610209	-3.86209
LSM1P1	0.214352	0.214352	2.18756	0.0408277	0.610748	-3.8646
MAGED1	0.234189	0.234189	2.18595	0.0409608	0.610893	-3.86733
FGF7P2	0.286651	0.286651	2.18431	0.0410975	0.610893	-3.87012
SH3PXD2A	0.22191	0.22191	2.18426	0.0411018	0.610893	-3.87021
ARPP19	0.208552	0.208552	2.18408	0.0411169	0.610893	-3.87052
MYL4	0.193678	0.193678	2.18387	0.0411341	0.610893	-3.87087
CATIP-AS1	0.183747	0.183747	2.18301	0.041206	0.610906	-3.87233
ARHGEF7	0.167764	0.167764	2.18156	0.0413272	0.610906	-3.87479
CNGA2	0.154168	0.154168	2.17955	0.0414961	0.610906	-3.87821
RHOU	0.156304	0.156304	2.17853	0.0415825	0.610906	-3.87995
SMG1P5	0.278126	0.278126	2.17681	0.0417278	0.611071	-3.88287
PHACTR3	0.153814	0.153814	2.17679	0.0417295	0.611071	-3.8829
BBS1	0.195465	0.195465	2.17634	0.0417671	0.611071	-3.88366
KCNMB1	0.194233	0.194233	2.17517	0.0418659	0.611071	-3.88563
BNIP3L	0.217041	0.217041	2.17402	0.0419643	0.611071	-3.8876
KLF9	0.287348	0.287348	2.17329	0.0420258	0.611071	-3.88882
UBE2H	0.227091	0.227091	2.17274	0.0420727	0.611071	-3.88976
SCG5	0.351368	0.351368	2.17248	0.0420955	0.611071	-3.89021
ZNF815P	0.170149	0.170149	2.17206	0.0421307	0.611071	-3.89091
BSN	0.179184	0.179184	2.1718	0.0421529	0.611071	-3.89135
ANO1	0.280416	0.280416	2.17163	0.0421675	0.611071	-3.89164
C6	0.20525	0.20525	2.17071	0.0422459	0.611381	-3.89319
IL20RB	0.262417	0.262417	2.17032	0.04228	0.611381	-3.89387
TSPY21P	0.181189	0.181189	2.16955	0.0423459	0.611385	-3.89517
TULP4	0.154646	0.154646	2.16954	0.042346	0.611385	-3.89517
GOLGA6L5P	0.230484	0.230484	2.16922	0.0423741	0.611468	-3.89573
SYNPO	0.244108	0.244108	2.16849	0.0424363	0.612042	-3.89696
DNAJA1P1	0.159092	0.159092	2.16746	0.0425253	0.612402	-3.89871
MSRB1P1	0.227658	0.227658	2.16716	0.042551	0.612402	-3.89921
PEX5L-AS2	0.17523	0.17523	2.16683	0.0425793	0.612487	-3.89977
UNC5B	0.230793	0.230793	2.16567	0.0426793	0.613236	-3.90173
FCN1	0.203803	0.203803	2.16506	0.0427319	0.613236	-3.90276
ADAM20P3	0.191506	0.191506	2.1649	0.0427457	0.613236	-3.90303
CCDC184	0.216936	0.216936	2.16463	0.0427689	0.613236	-3.90349
FAM99B	0.160437	0.160437	2.16415	0.0428111	0.613236	-3.90431
GAGE2D	0.212035	0.212035	2.16381	0.0428403	0.613256	-3.90488
OSER1	0.186169	0.186169	2.16277	0.0429299	0.61365	-3.90663
FPR3	0.30051	0.30051	2.16241	0.0429612	0.613776	-3.90724
CRYBG3	0.280184	0.280184	2.16149	0.0430411	0.614596	-3.90879
PKIA	0.294594	0.294594	2.15952	0.0432134	0.616089	-3.91213
EPSTI1	0.30454	0.30454	2.15895	0.0432633	0.616156	-3.91309
ZKSCAN7	0.273385	0.273385	2.15883	0.0432738	0.616156	-3.9133
TSPYL2	0.263541	0.263541	2.15777	0.0433664	0.616789	-3.91509
LZTS1	0.223008	0.223008	2.15701	0.043433	0.616837	-3.91637
TSHZ2	0.454376	0.454376	2.15694	0.0434388	0.616837	-3.91648
TRIM45	0.196916	0.196916	2.1566	0.0434691	0.616837	-3.91706
SRGAP2C	0.342069	0.342069	2.15581	0.0435381	0.617174	-3.91839
HIGD1AP8	0.181742	0.181742	2.1542	0.0436796	0.618444	-3.9211
ZNF861P	0.189326	0.189326	2.15415	0.0436845	0.618444	-3.92119
TMEM115	0.164484	0.164484	2.15141	0.0439264	0.61945	-3.9258
GOLGA2P11	0.21702	0.21702	2.15125	0.0439404	0.61945	-3.92607
NIM1K	0.190651	0.190651	2.14972	0.0440764	0.61945	-3.92865
DST	0.311574	0.311574	2.14971	0.0440772	0.61945	-3.92867
SLC29A4P1	0.153014	0.153014	2.1496	0.0440869	0.61945	-3.92885
PLN	0.300744	0.300744	2.14901	0.04414	0.61945	-3.92986
SNORD81	0.211902	0.211902	2.14836	0.0441971	0.61945	-3.93093
RBMX2P2	0.180018	0.180018	2.14792	0.0442365	0.61945	-3.93168
SPOCD1	0.182596	0.182596	2.14789	0.0442392	0.61945	-3.93173
ATG9A	0.246079	0.246079	2.14776	0.0442506	0.61945	-3.93194
CAP1P2	0.166246	0.166246	2.14736	0.044287	0.61945	-3.93263
HMGB3P30	0.167342	0.167342	2.14676	0.04434	0.619852	-3.93363
MGP	0.543517	0.543517	2.14589	0.0444183	0.62004	-3.9351
NKILA	0.252261	0.252261	2.14555	0.0444486	0.62004	-3.93567
RAB32	0.283294	0.283294	2.1455	0.0444534	0.62004	-3.93576
EDAR	0.266951	0.266951	2.14432	0.044559	0.620402	-3.93774
POT1-AS1	0.215811	0.215811	2.14352	0.0446302	0.620615	-3.93908
SMPD4P2	0.183681	0.183681	2.14198	0.0447693	0.620956	-3.94167
NDUFAF1	0.174575	0.174575	2.14143	0.0448192	0.620956	-3.9426
CDKN2B-AS1	0.190071	0.190071	2.1414	0.0448214	0.620956	-3.94264
CD163	0.366104	0.366104	2.14106	0.0448519	0.620956	-3.94321
CDH6	0.209382	0.209382	2.14082	0.0448739	0.620956	-3.94362
CIRBP	0.306215	0.306215	2.13895	0.0450434	0.621581	-3.94677
CHTF8P1	0.216326	0.216326	2.13856	0.0450788	0.621581	-3.94742
GNG4	0.414502	0.414502	2.13775	0.0451523	0.621581	-3.94878
FHAD1	0.224159	0.224159	2.13766	0.0451606	0.621581	-3.94893
SPARCL1	0.531818	0.531818	2.13731	0.0451922	0.621581	-3.94952
HMGN2P18	0.186517	0.186517	2.13679	0.0452398	0.621609	-3.95039
DUXAP10	0.31411	0.31411	2.1347	0.0454301	0.622682	-3.9539
PRDX2P3	0.179928	0.179928	2.13386	0.0455073	0.623089	-3.95531
RHO	0.218415	0.218415	2.13152	0.0457217	0.624148	-3.95923
GTF2IP2	0.172233	0.172233	2.12985	0.0458752	0.62468	-3.96203
ELFN2	0.206566	0.206566	2.12806	0.0460399	0.625064	-3.96501
KRBOX1	0.209108	0.209108	2.1275	0.046092	0.625064	-3.96595
ZFPM2	0.216134	0.216134	2.12685	0.0461525	0.625064	-3.96705
ARL2BPP4	0.176047	0.176047	2.12682	0.0461552	0.625064	-3.9671
MAST4-IT1	0.352189	0.352189	2.12494	0.0463298	0.625714	-3.97024
ZNF25	0.336032	0.336032	2.1245	0.0463707	0.625714	-3.97098
DUSP14	0.252741	0.252741	2.12417	0.0464011	0.625714	-3.97152
RAB1B	0.235549	0.235549	2.12399	0.0464179	0.625714	-3.97183
OPCML-IT1	0.193277	0.193277	2.12382	0.0464336	0.625714	-3.97211
KCTD9P3	0.182121	0.182121	2.12271	0.0465372	0.625714	-3.97396
CBX3P6	0.193516	0.193516	2.1226	0.0465478	0.625714	-3.97415
SLC38A7	0.205159	0.205159	2.12256	0.0465518	0.625714	-3.97423
OR7E11P	0.184959	0.184959	2.12236	0.0465699	0.625714	-3.97455
DBN1	0.233659	0.233659	2.1221	0.0465942	0.625732	-3.97498
HAVCR2	0.213602	0.213602	2.12163	0.0466381	0.626014	-3.97577
PDPN	0.283282	0.283282	2.12	0.0467914	0.626461	-3.9785
RPL4P6	0.217641	0.217641	2.11932	0.046855	0.626461	-3.97963
GPS2P1	0.175073	0.175073	2.11883	0.0469013	0.626461	-3.98045
LAPTM4A	0.237532	0.237532	2.11845	0.0469368	0.626461	-3.98108
OSBPL8	0.269693	0.269693	2.1176	0.047017	0.626461	-3.98251
FZD4	0.279776	0.279776	2.11688	0.047085	0.626461	-3.98371
MEIKIN	0.158627	0.158627	2.11615	0.0471533	0.626461	-3.98492
PLXNA1	0.149528	0.149528	2.11474	0.0472867	0.626668	-3.98727
ZFYVE16	0.252268	0.252268	2.11474	0.0472868	0.626668	-3.98727
GOLGA8M	0.246081	0.246081	2.11436	0.047323	0.626668	-3.98791
MS4A6E	0.185603	0.185603	2.11367	0.0473887	0.626668	-3.98906
ZNF415P1	0.225237	0.225237	2.11327	0.0474264	0.626668	-3.98972
LPAR4	0.16844	0.16844	2.11056	0.0476841	0.626668	-3.99423
PLA2G12AP2	0.198115	0.198115	2.10781	0.0479482	0.628358	-3.99883
IGFL1P2	0.16912	0.16912	2.10362	0.0483516	0.631891	-4.0058
CBX1P3	0.171556	0.171556	2.10248	0.048462	0.632383	-4.00769
SLC16A6	0.179244	0.179244	2.1023	0.0484792	0.632383	-4.00799
ZNF674	0.178983	0.178983	2.10055	0.0486488	0.633688	-4.01089
RASSF8-AS1	0.259172	0.259172	2.10017	0.0486854	0.633863	-4.01152
TNRC18P1	0.20219	0.20219	2.09915	0.0487846	0.634851	-4.01321
TRAJ14	0.15471	0.15471	2.09769	0.0489272	0.635193	-4.01564
HCK	0.243698	0.243698	2.09737	0.0489588	0.635301	-4.01617
OR7E97P	0.190817	0.190817	2.09198	0.0494885	0.637328	-4.02511
TRIM59	0.390408	0.390408	2.09153	0.0495329	0.637336	-4.02586
IGSF6	0.279388	0.279388	2.09123	0.0495623	0.637336	-4.02635
ASAP3	0.30779	0.30779	2.09008	0.0496766	0.637336	-4.02826
FKBP9P1	0.182124	0.182124	2.08973	0.0497108	0.637336	-4.02883
CEP170P1	0.221115	0.221115	2.08888	0.0497949	0.637336	-4.03024
TMEM135	0.223769	0.223769	2.08796	0.0498865	0.637336	-4.03176
STX8	0.224209	0.224209	2.08742	0.0499398	0.637336	-4.03265
SCUBE3	0.396728	0.396728	2.08729	0.0499534	0.637336	-4.03288
IDUA	0.173564	0.173564	2.08706	0.0499762	0.637336	-4.03326
CDY14P	0.241532	0.241532	2.08548	0.050134	0.637336	-4.03587
UBE2QL1	0.195861	0.195861	2.08464	0.0502175	0.637336	-4.03725
VCAM1	0.182367	0.182367	2.08445	0.0502368	0.637336	-4.03757
RPS6KB2	0.16395	0.16395	2.08345	0.0503371	0.637336	-4.03923
FLNC	0.263513	0.263513	2.08275	0.0504066	0.637336	-4.04037
RPS17P14	0.197746	0.197746	2.08272	0.0504098	0.637336	-4.04043
WDFY3-AS1	0.164429	0.164429	2.0809	0.050593	0.637336	-4.04344
B3GALT4	0.207727	0.207727	2.08084	0.0505995	0.637336	-4.04354
ZNF705A	0.320724	0.320724	2.08061	0.0506219	0.637336	-4.04391
RHOBTB1	0.270761	0.270761	2.07942	0.0507419	0.637336	-4.04587
DNM1P33	0.173358	0.173358	2.07884	0.0508005	0.637336	-4.04683
HK3	0.16775	0.16775	2.07434	0.0512576	0.637336	-4.05426
ARL5AP4	0.197404	0.197404	2.07426	0.051266	0.637336	-4.0544
NPM1P29	0.163582	0.163582	2.074	0.0512919	0.637336	-4.05481
GNAO1	0.170826	0.170826	2.07348	0.0513457	0.637336	-4.05568
IGHV1-12	0.181905	0.181905	2.07176	0.0515215	0.637336	-4.05852
RHOJ	0.315164	0.315164	2.07046	0.0516543	0.637336	-4.06065
GPR1	0.179051	0.179051	2.07019	0.0516818	0.637336	-4.06109
MSRB3	0.280098	0.280098	2.0699	0.0517114	0.637336	-4.06157
KRT38	0.189706	0.189706	2.06927	0.0517761	0.637336	-4.0626
GRIP1	0.212245	0.212245	2.06904	0.0518002	0.637336	-4.06299
RPL36AP33	0.304187	0.304187	2.06831	0.0518753	0.637356	-4.06419
CDH3	0.208159	0.208159	2.06825	0.0518814	0.637356	-4.06429
PCAT6	0.236623	0.236623	2.06713	0.0519965	0.637723	-4.06612
SCML4	0.213232	0.213232	2.06417	0.0523028	0.638769	-4.07099
CSRP2	0.251823	0.251823	2.06378	0.0523436	0.638769	-4.07163
ADGRA2	0.29106	0.29106	2.06317	0.0524075	0.638769	-4.07264
ZNF559-ZNF177	0.239413	0.239413	2.06316	0.052408	0.638769	-4.07265
CNTN4	0.304163	0.304163	2.06212	0.0525168	0.639524	-4.07437
VPREB3	0.238748	0.238748	2.06133	0.0525982	0.639944	-4.07565
ALPK2	0.395762	0.395762	2.06074	0.0526602	0.64005	-4.07663
COL5A2	0.160732	0.160732	2.06045	0.0526909	0.64005	-4.07711
RFTN2	0.394325	0.394325	2.05949	0.0527913	0.640866	-4.07869
CWF19L1	0.246087	0.246087	2.05852	0.0528921	0.641064	-4.08026
IRGM	0.189911	0.189911	2.05807	0.05294	0.641064	-4.08101
SNX19	0.172076	0.172076	2.05768	0.0529805	0.641064	-4.08165
EDARADD	0.268104	0.268104	2.05731	0.0530189	0.641064	-4.08225
RASAL2	0.306843	0.306843	2.05557	0.0532025	0.642055	-4.08511
SP6	0.176953	0.176953	2.05525	0.0532366	0.642055	-4.08564
CDH20	0.190196	0.190196	2.05502	0.0532604	0.642055	-4.08601
DCLK1	0.342525	0.342525	2.05478	0.0532861	0.642055	-4.08641
DCLK2	0.3712	0.3712	2.05373	0.0533968	0.642676	-4.08812
ENC1	0.230215	0.230215	2.05221	0.0535573	0.643445	-4.09061
LEF1-AS1	0.27172	0.27172	2.052	0.0535799	0.643445	-4.09096
KATNAL1	0.203379	0.203379	2.05188	0.053593	0.643445	-4.09116
GSTA6P	0.174758	0.174758	2.0508	0.0537074	0.64397	-4.09292
BCL6	0.163463	0.163463	2.05039	0.0537508	0.644207	-4.09359
RNF217	0.267085	0.267085	2.04992	0.0538008	0.644524	-4.09436
NR4A3	0.472224	0.472224	2.04908	0.0538902	0.644746	-4.09573
GMIP	0.169196	0.169196	2.04857	0.0539443	0.644828	-4.09656
HMGB1P46	0.197361	0.197361	2.0472	0.0540905	0.645404	-4.0988
FBXO42	0.145596	0.145596	2.04717	0.0540938	0.645404	-4.09885
AXDND1	0.187025	0.187025	2.04644	0.0541728	0.645862	-4.10006
C4A	0.200133	0.200133	2.04566	0.0542557	0.646287	-4.10132
C4B	0.200133	0.200133	2.04566	0.0542557	0.646287	-4.10132
CABP1	0.182528	0.182528	2.04513	0.0543122	0.646396	-4.10218
SNORA14A	0.318379	0.318379	2.04441	0.0543897	0.647036	-4.10336
MPRIPP1	0.176747	0.176747	2.04122	0.0547339	0.647996	-4.10857
GOLGA8N	0.344598	0.344598	2.04037	0.0548257	0.647996	-4.10996
PHACTR2-AS1	0.199872	0.199872	2.03988	0.0548791	0.648058	-4.11076
SEMA5A	0.235226	0.235226	2.0394	0.0549314	0.648395	-4.11155
TMEM105	0.195868	0.195868	2.03768	0.0551174	0.649882	-4.11434
TCF7L1-IT1	0.205444	0.205444	2.03721	0.0551686	0.649882	-4.11511
SIK1	0.327496	0.327496	2.03714	0.0551764	0.649882	-4.11523
OR9H1P	0.195957	0.195957	2.03487	0.0554245	0.652154	-4.11893
ZNF652P1	0.189073	0.189073	2.03437	0.0554791	0.652154	-4.11975
LAMC2	0.406294	0.406294	2.03313	0.055614	0.652389	-4.12175
QKI	0.28695	0.28695	2.03261	0.0556715	0.652389	-4.1226
TRAJ16	0.181844	0.181844	2.03159	0.0557841	0.653072	-4.12427
FAM89B	0.19674	0.19674	2.03117	0.05583	0.653072	-4.12495
AKAP13	0.242668	0.242668	2.02986	0.0559744	0.653945	-4.12708
SHISA7	0.178072	0.178072	2.02915	0.0560521	0.653945	-4.12823
FNTB	0.196004	0.196004	2.02897	0.0560723	0.653945	-4.12852
RAC1P9	0.189278	0.189278	2.02767	0.0562166	0.65448	-4.13065
SNORA51	0.366462	0.366462	2.02726	0.0562618	0.65448	-4.13131
SLC11A1	0.199664	0.199664	2.0266	0.0563344	0.654486	-4.13237
NPTX1	0.158364	0.158364	2.02493	0.0565206	0.655533	-4.1351
IGHVIII-25-1	0.182428	0.182428	2.02424	0.0565968	0.655599	-4.13621
DGAT2L6	0.217055	0.217055	2.02242	0.0567998	0.655707	-4.13916
PSMC1P3	0.170201	0.170201	2.02198	0.0568489	0.655721	-4.13987
SLIT2	0.285997	0.285997	2.02196	0.0568513	0.655721	-4.13991
ANKRD2	0.211161	0.211161	2.01966	0.0571089	0.656535	-4.14364
OR5AK1P	0.165261	0.165261	2.01959	0.0571165	0.656535	-4.14375
CLU	0.341681	0.341681	2.01923	0.057157	0.656535	-4.14433
NEDD9	0.170198	0.170198	2.0187	0.0572165	0.656535	-4.14519
CFAP73	0.160177	0.160177	2.01867	0.0572199	0.656535	-4.14524
AVPR1A	0.210845	0.210845	2.01836	0.0572557	0.656535	-4.14575
SLC18A3	0.174445	0.174445	2.01832	0.0572596	0.656535	-4.14581
NDUFS7	0.17053	0.17053	2.01818	0.0572758	0.656535	-4.14604
CHSY1	0.275674	0.275674	2.01684	0.057426	0.656867	-4.1482
CD70	0.249041	0.249041	2.01635	0.0574818	0.656867	-4.149
TNFAIP1	0.177747	0.177747	2.01543	0.0575854	0.656867	-4.15048
RASSF4	0.226528	0.226528	2.01536	0.0575939	0.656867	-4.15061
ISYNA1	0.169944	0.169944	2.0147	0.0576689	0.656867	-4.15168
ACTB	0.194295	0.194295	2.01427	0.0577175	0.656867	-4.15237
OGFR-AS1	0.164642	0.164642	2.01399	0.057749	0.656867	-4.15282
BNIP3P1	0.182118	0.182118	2.01297	0.0578647	0.657133	-4.15447
MAP1LC3B	0.194236	0.194236	2.01289	0.0578733	0.657133	-4.15459
NOTCH3	0.183722	0.183722	2.01028	0.0581716	0.659131	-4.15883
CABYR	0.245954	0.245954	2.01018	0.0581827	0.659131	-4.15899
PLIN2	0.268992	0.268992	2.0089	0.0583291	0.659649	-4.16106
HECW1	0.171446	0.171446	2.00838	0.0583888	0.659649	-4.1619
ECM1	0.203579	0.203579	2.00616	0.0586434	0.661058	-4.16548
STEAP3	0.217865	0.217865	2.00569	0.058697	0.661117	-4.16623
CPE	0.387013	0.387013	2.005	0.058777	0.661172	-4.16735
PTGES3P5	0.157461	0.157461	2.00396	0.0588964	0.661431	-4.16902
GPATCH2L	0.299685	0.299685	2.00324	0.0589793	0.661431	-4.17018
RBBP4P1	0.170555	0.170555	2.00194	0.0591303	0.661431	-4.17229
UBDP1	0.170612	0.170612	2.00126	0.0592088	0.661431	-4.17338
DUSP15	0.209115	0.209115	2.00109	0.0592283	0.661431	-4.17365
NACC2	0.158533	0.158533	2.00051	0.0592962	0.661431	-4.17459
RHOQ	0.251824	0.251824	2.00039	0.0593099	0.661431	-4.17478
BTNL10	0.188071	0.188071	2.00024	0.0593268	0.661431	-4.17501
KRT17P1	0.180997	0.180997	1.99966	0.059395	0.661431	-4.17596
TRMT1	0.225517	0.225517	1.9993	0.0594364	0.661431	-4.17653
ZNF259P1	0.20008	0.20008	1.99879	0.0594954	0.661431	-4.17735
TRIM26BP	0.180116	0.180116	1.99817	0.0595685	0.661431	-4.17836
ATF6	0.192347	0.192347	1.9981	0.0595762	0.661431	-4.17847
MAGED4	0.18891	0.18891	1.99738	0.0596599	0.661431	-4.17962
DLGAP4	0.173955	0.173955	1.99735	0.0596642	0.661431	-4.17968
SNAPC2	0.192301	0.192301	1.99637	0.0597784	0.661431	-4.18125
ANO2	0.229101	0.229101	1.99523	0.0599119	0.661431	-4.18309
ABHD17AP9	0.15844	0.15844	1.99507	0.0599305	0.661431	-4.18334
PLXNC1	0.372099	0.372099	1.9949	0.0599507	0.661431	-4.18362
MPZL1	0.210549	0.210549	1.99446	0.0600015	0.661431	-4.18432
TBX5-AS1	0.161026	0.161026	1.9944	0.0600089	0.661431	-4.18442
P3H3	0.136548	0.136548	1.99419	0.0600339	0.661439	-4.18476
MTCO2P9	0.153557	0.153557	1.99287	0.0601887	0.661828	-4.18688
JMJD1C-AS1	0.222017	0.222017	1.99267	0.0602127	0.661828	-4.1872
ST7-AS2	0.168242	0.168242	1.99245	0.0602389	0.661828	-4.18756
OR8G1	0.211061	0.211061	1.99177	0.0603185	0.662083	-4.18865
HUS1B	0.18	0.18	1.99053	0.0604648	0.662626	-4.19064
SPIN1	0.203068	0.203068	1.99013	0.0605125	0.662626	-4.19129
MORF4L1P1	0.25542	0.25542	1.98981	0.0605498	0.662626	-4.19179
SNORD114-12	0.417585	0.417585	1.98949	0.0605875	0.662626	-4.19231
DEFB115	0.178511	0.178511	1.98902	0.0606435	0.662626	-4.19306
RARB	0.200323	0.200323	1.98881	0.0606687	0.662626	-4.19341
RPS4XP12	0.156815	0.156815	1.98618	0.0609804	0.66383	-4.19761
CACNA1S	0.16439	0.16439	1.98596	0.061007	0.663855	-4.19797
IGHV1OR16-3	0.163064	0.163064	1.98481	0.0611443	0.664182	-4.19982
CYCSP27	0.204973	0.204973	1.98469	0.0611586	0.664182	-4.20001
FAM90A23P	0.178218	0.178218	1.98244	0.0614271	0.66559	-4.20361
SNX29	0.194634	0.194634	1.98222	0.0614538	0.66559	-4.20397
ZHX2	0.283502	0.283502	1.98042	0.06167	0.66559	-4.20685
ZFHX4-AS1	0.22165	0.22165	1.98034	0.0616794	0.66559	-4.20697
PCBP3	0.249644	0.249644	1.97889	0.0618536	0.66559	-4.20929
OR11L1	0.177414	0.177414	1.97877	0.0618691	0.66559	-4.20949
SLFN12	0.225252	0.225252	1.97874	0.0618722	0.66559	-4.20954
KLF7-IT1	0.201175	0.201175	1.97865	0.0618828	0.66559	-4.20968
ARHGEF26	0.181438	0.181438	1.97847	0.0619045	0.66559	-4.20996
CARD8	0.158302	0.158302	1.97792	0.0619709	0.66559	-4.21085
CDK14	0.342158	0.342158	1.97714	0.062066	0.666349	-4.2121
RBMS3-AS1	0.187771	0.187771	1.97672	0.062116	0.666381	-4.21276
FLJ42969	0.165989	0.165989	1.97417	0.0624253	0.666538	-4.21684
MORF4L2	0.160469	0.160469	1.974	0.0624462	0.666538	-4.21711
LRRC45	0.162998	0.162998	1.97283	0.062589	0.666538	-4.21899
ZNF786	0.146992	0.146992	1.97278	0.0625944	0.666538	-4.21906
TSPY19P	0.164055	0.164055	1.97225	0.0626597	0.66678	-4.21991
POP5	0.178049	0.178049	1.97166	0.0627317	0.66678	-4.22085
SIT1	0.181846	0.181846	1.97141	0.062762	0.66678	-4.22125
SARDH	0.16462	0.16462	1.97077	0.0628402	0.666927	-4.22227
VKORC1	0.201004	0.201004	1.97067	0.0628527	0.666927	-4.22244
GORAB	0.27036	0.27036	1.97024	0.0629048	0.667221	-4.22311
KCNT2	0.409895	0.409895	1.96983	0.062955	0.66733	-4.22377
MYO16-AS2	0.162093	0.162093	1.96965	0.0629774	0.66733	-4.22406
KRT8P6	0.196183	0.196183	1.9682	0.0631556	0.667515	-4.22638
HMGA1P5	0.153522	0.153522	1.96813	0.0631637	0.667515	-4.22648
LEMD2	0.162359	0.162359	1.96776	0.0632093	0.667515	-4.22707
BLOC1S4	0.183984	0.183984	1.96712	0.063288	0.667515	-4.22809
ENOX1-AS1	0.191758	0.191758	1.96687	0.0633187	0.667515	-4.22849
GNG11	0.3359	0.3359	1.9668	0.0633271	0.667515	-4.2286
ARHGEF15	0.217613	0.217613	1.96643	0.0633726	0.667515	-4.22919
SEC14L2	0.201339	0.201339	1.9656	0.0634748	0.667819	-4.23051
NEFL	0.188839	0.188839	1.96471	0.0635857	0.667831	-4.23194
IGHG3	0.589488	0.589488	1.96422	0.0636459	0.667859	-4.23272
BRPF1	0.169613	0.169613	1.96419	0.0636499	0.667859	-4.23277
KLHL24	0.17479	0.17479	1.96293	0.0638054	0.669207	-4.23477
SPI1	0.223906	0.223906	1.9626	0.0638467	0.669207	-4.2353
HIGD2B	0.184737	0.184737	1.96208	0.0639108	0.669207	-4.23612
MRPL22P1	0.190897	0.190897	1.96139	0.0639963	0.669207	-4.23721
SNORA69	0.330414	0.330414	1.96064	0.0640897	0.669207	-4.23841
PTGS1	0.201558	0.201558	1.95819	0.0643955	0.670092	-4.24231
HAUS6P2	0.19871	0.19871	1.95806	0.0644112	0.670092	-4.24251
ACTG1P17	0.167859	0.167859	1.95781	0.0644431	0.670092	-4.24291
PRPF6	0.164737	0.164737	1.95765	0.0644628	0.670092	-4.24316
NUMBL	0.176837	0.176837	1.95672	0.0645788	0.670647	-4.24463
PLA2G4F	0.14547	0.14547	1.95582	0.0646923	0.671471	-4.24607
EVA1C	0.228874	0.228874	1.95433	0.0648789	0.672484	-4.24843
SPON1	0.249867	0.249867	1.95081	0.0653234	0.675486	-4.25402
OR52A4P	0.194	0.194	1.95048	0.0653653	0.675486	-4.25454
CUBNP2	0.157373	0.157373	1.95047	0.0653664	0.675486	-4.25455
RMND5B	0.153674	0.153674	1.94983	0.0654482	0.675997	-4.25558
SSXP9	0.17397	0.17397	1.94969	0.0654654	0.675997	-4.25579
CLIP4	0.204257	0.204257	1.94829	0.0656428	0.676968	-4.25801
CD247	0.160338	0.160338	1.94756	0.0657358	0.677253	-4.25916
MAPKBP1	0.163576	0.163576	1.94645	0.0658776	0.677339	-4.26093
P4HA3	0.216198	0.216198	1.9464	0.0658835	0.677339	-4.261
FLNB	0.197692	0.197692	1.94569	0.0659745	0.677339	-4.26213
IL17REL	0.156355	0.156355	1.94534	0.0660195	0.677339	-4.26268
SUB1P2	0.198826	0.198826	1.94517	0.0660415	0.677339	-4.26296
OR2AS2P	0.215494	0.215494	1.94511	0.0660482	0.677339	-4.26304
CD93	0.270357	0.270357	1.94497	0.0660667	0.677339	-4.26327
USP17L15	0.202383	0.202383	1.94438	0.0661414	0.677735	-4.26419
HAPLN4	0.17667	0.17667	1.94315	0.0662999	0.678523	-4.26615
SNORD114-19	0.303972	0.303972	1.94248	0.0663858	0.678994	-4.26721
ARCN1	0.171608	0.171608	1.94235	0.0664022	0.678994	-4.26741
HSFY5P	0.157437	0.157437	1.94151	0.0665107	0.679848	-4.26874
CLIC3	0.168051	0.168051	1.9406	0.066627	0.680375	-4.27017
PGAM1P1	0.168632	0.168632	1.94052	0.066637	0.680375	-4.27029
ZNF90P3	0.169134	0.169134	1.94006	0.0666974	0.680738	-4.27103
PTH2R	0.151624	0.151624	1.93891	0.0668455	0.681114	-4.27285
SLC9A9	0.210049	0.210049	1.93675	0.067125	0.681114	-4.27625
C3orf18	0.270132	0.270132	1.93669	0.0671332	0.681114	-4.27635
RPL7P39	0.184611	0.184611	1.93631	0.0671812	0.681114	-4.27694
TNFAIP3	0.327108	0.327108	1.93592	0.0672322	0.681114	-4.27756
ADGRL4	0.223088	0.223088	1.93574	0.0672562	0.681114	-4.27785
FABP3	0.287403	0.287403	1.93531	0.0673113	0.681114	-4.27852
TPRX2P	0.15715	0.15715	1.93495	0.0673592	0.681114	-4.2791
ZSCAN16-AS1	0.150553	0.150553	1.93494	0.0673602	0.681114	-4.27911
ZEB2P1	0.161866	0.161866	1.9347	0.0673915	0.681114	-4.27949
ADAM22	0.560581	0.560581	1.93445	0.0674232	0.681114	-4.27988
KCTD10	0.171729	0.171729	1.93438	0.0674328	0.681114	-4.27999
NID1	0.228114	0.228114	1.93282	0.0676354	0.681832	-4.28244
RFPL4AP5	0.144532	0.144532	1.93258	0.0676669	0.681832	-4.28282
HMGB1P15	0.186253	0.186253	1.93226	0.0677098	0.681832	-4.28334
CCDC102B	0.365352	0.365352	1.93123	0.0678434	0.681832	-4.28495
EMID1	0.150916	0.150916	1.93082	0.0678974	0.681832	-4.2856
NUPR1	0.179341	0.179341	1.93073	0.067909	0.681832	-4.28574
PIM1	0.256247	0.256247	1.93005	0.0679979	0.681832	-4.2868
PHBP6	0.198333	0.198333	1.92876	0.0681676	0.682657	-4.28884
PEG3-AS1	0.227114	0.227114	1.92862	0.0681857	0.682657	-4.28905
MAN1B1	0.168415	0.168415	1.92769	0.0683088	0.683138	-4.29053
NUBP1	0.173381	0.173381	1.92552	0.0685955	0.6845	-4.29394
LCN6	0.17817	0.17817	1.92501	0.068662	0.684785	-4.29473
LAMA1	0.177203	0.177203	1.92311	0.0689146	0.685868	-4.29773
FKBP14	0.260823	0.260823	1.92263	0.0689782	0.686063	-4.29848
EIF1B-AS1	0.137766	0.137766	1.92214	0.0690425	0.686281	-4.29924
DNAH11	0.14936	0.14936	1.92141	0.0691398	0.686393	-4.30039
CPA4	0.163052	0.163052	1.9214	0.0691413	0.686393	-4.30041
GNS	0.270126	0.270126	1.92117	0.0691716	0.686393	-4.30076
NPM1P49	0.163121	0.163121	1.92023	0.0692977	0.686807	-4.30225
UBE2WP1	0.186114	0.186114	1.92013	0.0693103	0.686807	-4.3024
SCARNA11	0.200613	0.200613	1.91999	0.0693297	0.686807	-4.30262
MMP23B	0.180098	0.180098	1.91924	0.0694295	0.687047	-4.3038
MDM4	0.208801	0.208801	1.91815	0.0695751	0.68799	-4.3055
CSTP2	0.215193	0.215193	1.91638	0.069813	0.688993	-4.30829
RPL7P61	0.134172	0.134172	1.91586	0.0698821	0.688993	-4.30909
PAK3	0.18282	0.18282	1.91553	0.0699264	0.688993	-4.30961
MSANTD3-TMEFF1	0.184454	0.184454	1.91551	0.0699289	0.688993	-4.30964
NUDT9P1	0.1719	0.1719	1.91522	0.0699683	0.689132	-4.3101
CORO2B	0.207664	0.207664	1.91388	0.070149	0.689543	-4.3122
MEG8	0.350282	0.350282	1.9123	0.0703614	0.690212	-4.31466
IGHV2OR16-5	0.191336	0.191336	1.91216	0.070381	0.690212	-4.31489
SLC43A3	0.192683	0.192683	1.91216	0.0703813	0.690212	-4.31489
DNM1P32	0.174628	0.174628	1.91053	0.0706021	0.691384	-4.31744
PDLIM5	0.221104	0.221104	1.90942	0.0707525	0.691787	-4.31917
SCRN1	0.252886	0.252886	1.90892	0.0708195	0.691787	-4.31994
ASAP1	0.265394	0.265394	1.90872	0.0708476	0.691787	-4.32027
LAMP5	0.191637	0.191637	1.90846	0.0708833	0.691787	-4.32068
FBXO32	0.498058	0.498058	1.90798	0.0709475	0.691986	-4.32141
ZFP37	0.180349	0.180349	1.90765	0.0709931	0.691986	-4.32193
GDF10	0.177687	0.177687	1.90719	0.0710562	0.692077	-4.32266
BLOC1S2	0.159031	0.159031	1.90703	0.0710778	0.692077	-4.32291
PLEK	0.326673	0.326673	1.90684	0.0711038	0.692077	-4.3232
ATP6V1E1	0.201905	0.201905	1.90648	0.0711524	0.692166	-4.32376
WBP1LP10	0.138627	0.138627	1.90595	0.0712248	0.692166	-4.32459
CFAP54	0.381827	0.381827	1.90583	0.071241	0.692166	-4.32477
UCN	0.173239	0.173239	1.9044	0.071437	0.69285	-4.32701
KATNB1	0.158865	0.158865	1.90388	0.0715086	0.693298	-4.32782
DZIP3	0.203467	0.203467	1.90306	0.0716211	0.693897	-4.3291
B3GNTL1P1	0.213355	0.213355	1.90253	0.0716935	0.694018	-4.32992
PABPC1L2B-AS1	0.197857	0.197857	1.90111	0.0718892	0.694561	-4.33214
SPDYE1	0.222122	0.222122	1.90089	0.0719187	0.694561	-4.33247
SNORD113-5	0.31983	0.31983	1.89989	0.0720575	0.694721	-4.33404
RHOD	0.146708	0.146708	1.89976	0.0720759	0.694721	-4.33425
TSPY16P	0.155919	0.155919	1.89965	0.0720911	0.694721	-4.33442
CADM1	0.181474	0.181474	1.89935	0.0721312	0.694721	-4.33487
THRB-AS1	0.180074	0.180074	1.89876	0.0722133	0.694721	-4.3358
ZNF890P	0.159905	0.159905	1.8985	0.0722493	0.694721	-4.3362
GLIS2	0.199392	0.199392	1.89824	0.0722859	0.694721	-4.33661
POLK	0.24485	0.24485	1.89778	0.0723484	0.694721	-4.33732
DYNC1LI2	0.169114	0.169114	1.89746	0.0723933	0.694721	-4.33782
ACSL1	0.214429	0.214429	1.89567	0.0726415	0.695475	-4.3406
OR4F15	0.209716	0.209716	1.89518	0.0727094	0.695798	-4.34136
ANKRD44	0.224696	0.224696	1.89439	0.0728201	0.695971	-4.3426
KRTAP12-1	0.169078	0.169078	1.89424	0.0728407	0.695971	-4.34283
UGCG	0.258526	0.258526	1.89378	0.0729051	0.695971	-4.34355
RCAN2	0.229357	0.229357	1.89313	0.0729954	0.696339	-4.34455
GAS2L1P2	0.142582	0.142582	1.8928	0.073042	0.69654	-4.34507
FAM205A	0.161741	0.161741	1.89189	0.0731697	0.697271	-4.34649
AIRN	0.174067	0.174067	1.89147	0.0732276	0.697427	-4.34713
SNRPEP8	0.173147	0.173147	1.89069	0.0733372	0.697649	-4.34835
DNM1P34	0.155542	0.155542	1.89049	0.073365	0.697671	-4.34865
MTCO3P23	0.326201	0.326201	1.8891	0.0735608	0.69823	-4.35082
DNAJB5	0.197411	0.197411	1.88789	0.0737302	0.69871	-4.35269
GAL3ST4	0.183215	0.183215	1.88765	0.0737648	0.698795	-4.35307
FADS2	0.363471	0.363471	1.88703	0.0738524	0.699146	-4.35403
MNDA	0.260738	0.260738	1.88702	0.0738531	0.699146	-4.35404
MRPL57P3	0.165168	0.165168	1.8863	0.0739552	0.699166	-4.35516
ZNF746	0.142811	0.142811	1.88547	0.0740728	0.699166	-4.35645
MOK	0.250043	0.250043	1.884	0.0742809	0.699166	-4.35873
MS4A4E	0.226804	0.226804	1.88377	0.0743135	0.699166	-4.35908
GOT2P5	0.161314	0.161314	1.88341	0.0743643	0.699166	-4.35964
TBC1D24	0.186717	0.186717	1.88341	0.0743645	0.699166	-4.35964
GUCY2EP	0.145893	0.145893	1.88328	0.0743831	0.699166	-4.35984
LRRN1	0.227498	0.227498	1.88276	0.0744563	0.699166	-4.36064
OLFML2A	0.164081	0.164081	1.88204	0.0745584	0.699604	-4.36175
CTSL	0.172397	0.172397	1.88105	0.0746998	0.700069	-4.36329
F9	0.203928	0.203928	1.88091	0.0747198	0.700069	-4.36351
SUB1P1	0.13132	0.13132	1.88039	0.0747945	0.70027	-4.36432
ACOT9	0.208202	0.208202	1.88007	0.0748389	0.70027	-4.3648
FAM197Y9	0.139171	0.139171	1.8785	0.0750639	0.701011	-4.36723
TRPV4	0.249293	0.249293	1.87823	0.075103	0.701011	-4.36766
CBX1P5	0.140279	0.140279	1.87772	0.0751757	0.701011	-4.36844
ZNF821	0.170473	0.170473	1.87769	0.0751799	0.701011	-4.36848
MSC-AS1	0.247217	0.247217	1.8773	0.0752363	0.701058	-4.36909
CTRB1	0.13486	0.13486	1.87661	0.0753345	0.701157	-4.37015
PIGFP3	0.160257	0.160257	1.87565	0.0754725	0.701157	-4.37163
FAM180A	0.239941	0.239941	1.87559	0.0754819	0.701157	-4.37173
CATSPERB	0.162878	0.162878	1.87483	0.0755909	0.701157	-4.3729
SNAI3	0.167311	0.167311	1.8746	0.075624	0.701157	-4.37326
LPP-AS2	0.154857	0.154857	1.87451	0.0756365	0.701157	-4.37339
YRDCP3	0.13528	0.13528	1.87301	0.0758527	0.702143	-4.37571
STT3A-AS1	0.140963	0.140963	1.86949	0.0763628	0.702333	-4.38114
MYLK	0.297114	0.297114	1.86922	0.076402	0.702333	-4.38155
MAK	0.168735	0.168735	1.8689	0.0764484	0.702376	-4.38204
ACAP3	0.141618	0.141618	1.86788	0.0765976	0.702947	-4.38362
CNOT4	0.18195	0.18195	1.86699	0.0767265	0.703657	-4.38498
RBM22P4	0.1649	0.1649	1.86634	0.0768211	0.703899	-4.38598
NAP1L4P1	0.165702	0.165702	1.86628	0.0768303	0.703899	-4.38608
ZEB2	0.178041	0.178041	1.86523	0.0769839	0.704598	-4.3877
RPL23AP62	0.162497	0.162497	1.86447	0.0770949	0.704669	-4.38886
RCN3	0.179542	0.179542	1.86269	0.0773569	0.706075	-4.39161
MSX2P1	0.170225	0.170225	1.86254	0.0773781	0.706075	-4.39183
TCEAL7	0.175599	0.175599	1.86217	0.0774326	0.706336	-4.3924
BLOC1S3	0.191606	0.191606	1.86082	0.0776323	0.707462	-4.39448
TSPY11P	0.190812	0.190812	1.86077	0.0776386	0.707462	-4.39455
RPL26P30	0.208974	0.208974	1.86052	0.0776757	0.707462	-4.39493
HTRA3	0.197249	0.197249	1.8601	0.0777374	0.707462	-4.39558
PLEKHG1	0.275242	0.275242	1.85838	0.0779917	0.707984	-4.39822
PCED1CP	0.157279	0.157279	1.8581	0.0780327	0.707984	-4.39864
KRT17P4	0.14094	0.14094	1.85704	0.0781902	0.708242	-4.40028
NRIP1	0.198128	0.198128	1.85655	0.0782628	0.708242	-4.40103
LRRC4C	0.221766	0.221766	1.85468	0.0785405	0.709762	-4.40389
CSPG4P13	0.169213	0.169213	1.85172	0.0789838	0.711096	-4.40844
KRTAP6-2	0.171124	0.171124	1.85141	0.0790296	0.711096	-4.40891
DGUOK	0.151467	0.151467	1.85114	0.0790695	0.711096	-4.40931
PNMA5	0.16163	0.16163	1.85001	0.079239	0.711096	-4.41104
MX1	0.266925	0.266925	1.8498	0.0792706	0.711096	-4.41137
TRBV14	0.178716	0.178716	1.84975	0.0792776	0.711096	-4.41144
UQCRHP4	0.144655	0.144655	1.84797	0.0795456	0.712752	-4.41416
LGMNP1	0.165853	0.165853	1.84726	0.0796533	0.713181	-4.41526
HIF1A-AS2	0.205474	0.205474	1.8459	0.0798587	0.713687	-4.41734
ADCY7	0.185131	0.185131	1.84556	0.0799097	0.713687	-4.41785
CD81	0.188403	0.188403	1.84527	0.0799535	0.713719	-4.41829
COPS6	0.153858	0.153858	1.84515	0.0799717	0.713719	-4.41848
IMMTP1	0.178778	0.178778	1.84483	0.0800196	0.713719	-4.41896
DCP2	0.206221	0.206221	1.84394	0.0801548	0.714692	-4.42032
ENPP7P9	0.148929	0.148929	1.84188	0.0804677	0.716131	-4.42347
IFT80	0.199458	0.199458	1.84163	0.0805057	0.716131	-4.42385
APOA4	0.151971	0.151971	1.84156	0.0805167	0.716131	-4.42396
ELL	0.171514	0.171514	1.84057	0.080667	0.716169	-4.42546
OR8B6P	0.193931	0.193931	1.84046	0.0806832	0.716169	-4.42563
PSMD10P2	0.144356	0.144356	1.84034	0.080702	0.716169	-4.42581
RPL27P12	0.153293	0.153293	1.83975	0.0807916	0.716169	-4.42671
ACTG1P13	0.151831	0.151831	1.83948	0.0808336	0.716169	-4.42713
TET1	0.168038	0.168038	1.83942	0.0808427	0.716169	-4.42722
ASXL3	0.158963	0.158963	1.83919	0.080877	0.716169	-4.42756
PRSS3P1	0.206226	0.206226	1.83891	0.0809208	0.716169	-4.428
FCF1P3	0.142915	0.142915	1.83804	0.0810535	0.71662	-4.42932
LST1	0.243158	0.243158	1.83696	0.0812182	0.717843	-4.43096
DKK2	0.370891	0.370891	1.83638	0.0813077	0.717925	-4.43185
FGF7P1	0.221297	0.221297	1.8353	0.0814737	0.718706	-4.43349
EXOSC3P2	0.163828	0.163828	1.83455	0.0815888	0.719257	-4.43463
CTD-2194D22.4	0.146296	0.146296	1.83271	0.0818731	0.720014	-4.43743
KLF11	0.225297	0.225297	1.8321	0.0819664	0.720014	-4.43835
TEAD3	0.141689	0.141689	1.83177	0.0820182	0.720014	-4.43886
ZSCAN4	0.16446	0.16446	1.8316	0.0820439	0.720014	-4.43911
OGN	0.603169	0.603169	1.83132	0.0820877	0.720166	-4.43954
RNF216	0.162065	0.162065	1.83011	0.0822756	0.720748	-4.44138
GOLGA6L4	0.164289	0.164289	1.82906	0.0824387	0.720886	-4.44298
RPL7P41	0.222463	0.222463	1.82744	0.0826895	0.721685	-4.44543
GABRE	0.336244	0.336244	1.82715	0.0827357	0.721685	-4.44588
PBX4	0.151864	0.151864	1.82684	0.0827836	0.721685	-4.44634
VDAC2P4	0.178734	0.178734	1.8268	0.0827895	0.721685	-4.4464
EHD3	0.155252	0.155252	1.82506	0.0830613	0.722063	-4.44904
MTND4P18	0.168818	0.168818	1.82467	0.0831227	0.722063	-4.44963
DYNC2H1	0.21334	0.21334	1.82458	0.083137	0.722063	-4.44977
MTCO3P30	0.187207	0.187207	1.82375	0.0832665	0.722063	-4.45103
RARA	0.159492	0.159492	1.82327	0.0833417	0.722063	-4.45175
NANOS1	0.140471	0.140471	1.82327	0.0833424	0.722063	-4.45176
OTOS	0.178042	0.178042	1.82293	0.0833952	0.722063	-4.45227
ZEB2-AS1	0.145045	0.145045	1.8226	0.0834466	0.722063	-4.45277
MORC2	0.18744	0.18744	1.82249	0.0834646	0.722063	-4.45294
CRISPLD2	0.195649	0.195649	1.8221	0.0835255	0.722063	-4.45353
XAGE1B	0.15306	0.15306	1.82124	0.0836615	0.722063	-4.45484
TACSTD2	0.379687	0.379687	1.82093	0.0837093	0.722063	-4.45529
ADRB2	0.131286	0.131286	1.82083	0.0837259	0.722063	-4.45545
JMJD7	0.183727	0.183727	1.82008	0.0838427	0.722063	-4.45658
TOR1AIP1	0.244925	0.244925	1.81963	0.0839141	0.722063	-4.45726
HMGB1P4	0.147454	0.147454	1.81873	0.0840567	0.722063	-4.45863
HMGN1P16	0.193754	0.193754	1.81757	0.0842406	0.722063	-4.46038
RSPO3	0.408736	0.408736	1.81752	0.0842474	0.722063	-4.46045
PRMT8	0.174515	0.174515	1.81727	0.0842874	0.722063	-4.46083
CH507-9B2.8	0.175248	0.175248	1.81692	0.0843436	0.722177	-4.46137
TRIM77BP	0.12723	0.12723	1.81635	0.084433	0.722177	-4.46222
IGLV1-40	0.323882	0.323882	1.81611	0.0844707	0.722231	-4.46258
SMAD7	0.226211	0.226211	1.81497	0.0846525	0.722548	-4.46431
RABAC1	0.128468	0.128468	1.81398	0.0848093	0.722683	-4.4658
GPR137	0.167588	0.167588	1.8136	0.0848709	0.722683	-4.46638
PDK2	0.165599	0.165599	1.81356	0.0848774	0.722683	-4.46644
IGLV1-50	0.249767	0.249767	1.81348	0.0848892	0.722683	-4.46655
PMFBP1	0.16632	0.16632	1.81325	0.0849268	0.722778	-4.46691
ACTN1-AS1	0.216756	0.216756	1.81229	0.0850796	0.723853	-4.46835
CCDC77	0.187857	0.187857	1.81205	0.0851179	0.723953	-4.46871
DNM1P46	0.148718	0.148718	1.81034	0.0853908	0.725402	-4.47129
NPM1P9	0.159022	0.159022	1.80979	0.0854788	0.725402	-4.47211
ZNF366	0.19594	0.19594	1.80929	0.0855597	0.725462	-4.47288
SLC2A14	0.388859	0.388859	1.80928	0.085561	0.725462	-4.47289
FOXP4	0.18537	0.18537	1.8087	0.0856549	0.725867	-4.47377
DTNBP1	0.150374	0.150374	1.8082	0.0857349	0.725867	-4.47452
MAFB	0.174389	0.174389	1.80546	0.0861766	0.727477	-4.47865
PPEF2	0.150605	0.150605	1.8051	0.0862336	0.727477	-4.47918
ZNF271P	0.189424	0.189424	1.80509	0.0862359	0.727477	-4.4792
LRRK2	0.188766	0.188766	1.8042	0.0863789	0.727735	-4.48053
TTC14	0.18152	0.18152	1.8036	0.086477	0.727804	-4.48144
UBALD1	0.201243	0.201243	1.80309	0.0865593	0.728272	-4.4822
RAP2B	0.16327	0.16327	1.80217	0.0867086	0.729079	-4.48359
MTCO1P51	0.172356	0.172356	1.80063	0.0869593	0.729723	-4.4859
RGS10	0.239002	0.239002	1.80033	0.0870074	0.729723	-4.48635
TINCR	0.138652	0.138652	1.79909	0.0872103	0.729723	-4.48821
TRANK1	0.147981	0.147981	1.79898	0.0872285	0.729723	-4.48838
MAP9	0.177021	0.177021	1.79877	0.0872627	0.729723	-4.4887
ART4	0.145368	0.145368	1.79847	0.0873113	0.729723	-4.48914
C1QTNF3	0.301005	0.301005	1.79833	0.0873343	0.729723	-4.48936
UBC	0.196047	0.196047	1.7978	0.0874202	0.729723	-4.49014
ITGA8	0.164756	0.164756	1.79735	0.087494	0.729723	-4.49082
SCYL1	0.127235	0.127235	1.79706	0.0875412	0.729723	-4.49125
UNC5C	0.201406	0.201406	1.79673	0.0875953	0.729723	-4.49175
STMN3	0.140955	0.140955	1.79662	0.0876128	0.729723	-4.49191
KCNJ15	0.177884	0.177884	1.7962	0.0876827	0.729723	-4.49255
DEFB105B	0.176338	0.176338	1.79571	0.0877633	0.729723	-4.49328
DHRS2	0.155751	0.155751	1.79563	0.0877761	0.729723	-4.4934
ZMYND10-AS1	0.136194	0.136194	1.79508	0.0878664	0.729723	-4.49423
ASPG	0.134644	0.134644	1.79477	0.0879175	0.729723	-4.49469
KSR1P1	0.156743	0.156743	1.7944	0.0879772	0.729723	-4.49524
ADAMTS7P4	0.137406	0.137406	1.79331	0.0881578	0.729723	-4.49688
GOLGA6L3	0.157708	0.157708	1.79306	0.088198	0.729723	-4.49725
KLHL21	0.150968	0.150968	1.79294	0.0882176	0.729723	-4.49742
PSMD4	0.168226	0.168226	1.79195	0.0883816	0.729723	-4.49891
CICP5	0.128769	0.128769	1.79184	0.0883992	0.729723	-4.49907
ZBTB20	0.276131	0.276131	1.79172	0.0884202	0.729723	-4.49926
SYT4	0.170531	0.170531	1.79157	0.0884442	0.729723	-4.49948
C3orf36	0.147648	0.147648	1.79057	0.0886089	0.729723	-4.50097
NENFP3	0.148839	0.148839	1.78962	0.0887662	0.729723	-4.50239
NPSR1-AS1	0.135346	0.135346	1.78943	0.0887983	0.729723	-4.50268
EEF1GP2	0.184566	0.184566	1.78878	0.0889061	0.729723	-4.50365
LIMK1	0.223209	0.223209	1.78869	0.0889215	0.729723	-4.50379
CD53	0.284442	0.284442	1.78775	0.0890763	0.729723	-4.50518
SEMA6A-AS1	0.171242	0.171242	1.7868	0.0892351	0.729723	-4.50661
GTF2F2P2	0.197858	0.197858	1.78666	0.0892584	0.729723	-4.50682
NDUFB1P2	0.200774	0.200774	1.78586	0.0893914	0.729723	-4.50801
C1orf185	0.164305	0.164305	1.78568	0.0894215	0.729723	-4.50828
USP50	0.228167	0.228167	1.78564	0.0894282	0.729723	-4.50834
CICP4	0.141081	0.141081	1.7855	0.0894509	0.729723	-4.50855
RPL7P31	0.184749	0.184749	1.78541	0.089467	0.729723	-4.50869
CST5	0.140488	0.140488	1.78465	0.0895939	0.730194	-4.50982
KRTDAP	0.207022	0.207022	1.78429	0.0896536	0.730194	-4.51036
TMEM127	0.176047	0.176047	1.78412	0.089682	0.730194	-4.51061
SLC9A7P1	0.159106	0.159106	1.78382	0.0897317	0.730194	-4.51105
PYHIN1	0.165833	0.165833	1.78342	0.0897983	0.730194	-4.51165
BNC1	0.131158	0.131158	1.78333	0.0898143	0.730194	-4.51179
TGM2	0.178646	0.178646	1.78302	0.0898654	0.730194	-4.51225
MTCO3P18	0.153498	0.153498	1.78278	0.0899059	0.730194	-4.51261
NR2F2	0.29178	0.29178	1.78054	0.0902821	0.731202	-4.51595
CFL1P2	0.17331	0.17331	1.77836	0.0906486	0.732559	-4.51919
WTAPP1	0.175009	0.175009	1.77824	0.0906702	0.732559	-4.51938
AK5	0.252755	0.252755	1.77818	0.0906793	0.732559	-4.51946
PTGER3	0.167419	0.167419	1.77809	0.090694	0.732559	-4.51959
IFFO2	0.156327	0.156327	1.77777	0.0907487	0.732559	-4.52007
TTC7A	0.158586	0.158586	1.77743	0.0908067	0.732559	-4.52058
CIAO1	0.187236	0.187236	1.77739	0.0908137	0.732559	-4.52064
VDAC1P12	0.188151	0.188151	1.77629	0.0909989	0.732999	-4.52227
SYNDIG1	0.145942	0.145942	1.77571	0.0910972	0.732999	-4.52314
SLC24A3	0.151623	0.151623	1.77517	0.0911882	0.732999	-4.52393
CELF3	0.148721	0.148721	1.77514	0.0911932	0.732999	-4.52398
S100A9	0.258439	0.258439	1.77439	0.0913218	0.732999	-4.52511
CAT	0.178233	0.178233	1.77437	0.0913237	0.732999	-4.52512
SNORA54	0.364758	0.364758	1.77397	0.0913918	0.732999	-4.52572
NEIL1	0.1364	0.1364	1.7733	0.0915056	0.732999	-4.52671
ADGRL2	0.171337	0.171337	1.77288	0.0915772	0.732999	-4.52734
GRID2IP	0.128927	0.128927	1.77234	0.09167	0.732999	-4.52815
TSSK4	0.145633	0.145633	1.77219	0.0916946	0.732999	-4.52836
DBH-AS1	0.138593	0.138593	1.77197	0.0917329	0.732999	-4.5287
ZNF252P	0.151674	0.151674	1.77196	0.0917343	0.732999	-4.52871
KIAA1549L	0.142748	0.142748	1.7711	0.0918808	0.733149	-4.52998
IGHVII-33-1	0.158733	0.158733	1.77109	0.0918837	0.733149	-4.53001
KYNU	0.240735	0.240735	1.77015	0.0920426	0.733149	-4.53139
NRK	0.191897	0.191897	1.76999	0.0920713	0.733149	-4.53164
STEAP2-AS1	0.172076	0.172076	1.76997	0.0920737	0.733149	-4.53166
DNAH17	0.157707	0.157707	1.76962	0.0921338	0.733149	-4.53218
FKBP4P7	0.150339	0.150339	1.76914	0.0922168	0.733149	-4.5329
ARHGEF6	0.218318	0.218318	1.76842	0.0923392	0.733149	-4.53396
HIF3A	0.169984	0.169984	1.76767	0.0924679	0.733149	-4.53507
ATP6V1G1P3	0.145042	0.145042	1.76766	0.0924704	0.733149	-4.53509
FAM170B	0.144853	0.144853	1.76752	0.0924938	0.733149	-4.53529
KDM5B	0.238859	0.238859	1.76743	0.0925096	0.733149	-4.53543
CDK5R1	0.163685	0.163685	1.76601	0.0927543	0.733321	-4.53754
CDKL5	0.173725	0.173725	1.76529	0.0928768	0.733321	-4.53859
NLGN4X	0.204986	0.204986	1.76472	0.0929751	0.733321	-4.53944
RAB4B	0.140156	0.140156	1.76448	0.0930167	0.733321	-4.53979
PRINS	0.181167	0.181167	1.76424	0.0930592	0.733321	-4.54016
CSNK1E	0.164611	0.164611	1.76422	0.0930622	0.733321	-4.54018
SREBF1	0.167436	0.167436	1.76393	0.0931129	0.733321	-4.54062
ATXN10	0.226671	0.226671	1.76387	0.0931223	0.733321	-4.5407
PSG1	0.151677	0.151677	1.76137	0.0935554	0.735102	-4.5444
RBMY2JP	0.212443	0.212443	1.75978	0.0938305	0.735532	-4.54675
LEPR	0.18886	0.18886	1.75948	0.0938826	0.735532	-4.54719
RBFOX2	0.174733	0.174733	1.7593	0.0939138	0.735532	-4.54745
NXF4	0.194503	0.194503	1.75929	0.0939164	0.735532	-4.54747
NTF6B	0.145831	0.145831	1.75899	0.093969	0.735534	-4.54792
NACAD	0.167376	0.167376	1.75874	0.0940127	0.735665	-4.54829
SNX9	0.188344	0.188344	1.75789	0.0941593	0.736204	-4.54953
GPRC5C	0.172728	0.172728	1.75694	0.094325	0.736659	-4.55094
PLEKHO1	0.169147	0.169147	1.75693	0.0943275	0.736659	-4.55096
CICP11	0.175238	0.175238	1.75673	0.0943623	0.736659	-4.55125
ANKRD13A	0.227157	0.227157	1.75644	0.0944127	0.736659	-4.55168
C5orf15	0.19981	0.19981	1.75449	0.0947537	0.737025	-4.55455
CTBP2P7	0.152417	0.152417	1.75449	0.094755	0.737025	-4.55456
ERC2-IT1	0.13786	0.13786	1.75433	0.094782	0.737025	-4.55479
PARP11	0.157977	0.157977	1.75429	0.0947891	0.737025	-4.55485
CASKIN2	0.167366	0.167366	1.75422	0.0948022	0.737025	-4.55496
FMO2	0.183321	0.183321	1.75418	0.0948079	0.737025	-4.55501
C11orf68	0.157376	0.157376	1.75413	0.0948169	0.737025	-4.55508
RIMKLB	0.305803	0.305803	1.75343	0.09494	0.737025	-4.55612
KCNC1	0.215561	0.215561	1.7528	0.0950509	0.737025	-4.55705
PSMD6-AS2	0.206269	0.206269	1.75273	0.0950639	0.737025	-4.55716
FLJ43663	0.217195	0.217195	1.75264	0.0950794	0.737025	-4.55729
NLRP11	0.198591	0.198591	1.75258	0.0950898	0.737025	-4.55737
ELK2AP	0.197919	0.197919	1.75231	0.0951376	0.737025	-4.55777
LYNX1	0.158203	0.158203	1.75213	0.0951685	0.737025	-4.55803
ROBO3	0.161882	0.161882	1.75083	0.0953975	0.737025	-4.55995
IL6STP1	0.192342	0.192342	1.75075	0.0954126	0.737025	-4.56007
FAM207CP	0.167562	0.167562	1.7502	0.0955093	0.737025	-4.56088
B3GLCT	0.16365	0.16365	1.75009	0.095529	0.737025	-4.56104
SLC7A8	0.266556	0.266556	1.75	0.0955441	0.737025	-4.56117
ANXA3	0.278143	0.278143	1.74986	0.0955689	0.737025	-4.56138
PARP1P1	0.155024	0.155024	1.7489	0.0957384	0.737025	-4.56279
BMP7	0.235678	0.235678	1.74874	0.0957665	0.737025	-4.56302
KRT18P21	0.129136	0.129136	1.74858	0.0957951	0.737025	-4.56326
FLJ42627	0.134929	0.134929	1.74846	0.0958173	0.737025	-4.56344
SLC25A30	0.189237	0.189237	1.74798	0.095902	0.737025	-4.56415
ISG15	0.245078	0.245078	1.74753	0.0959809	0.737025	-4.5648
PSAPL1	0.13551	0.13551	1.74744	0.0959965	0.737025	-4.56493
DCD	0.156528	0.156528	1.74699	0.0960768	0.737025	-4.5656
MTND6P2	0.174614	0.174614	1.7469	0.0960929	0.737025	-4.56573
SSU72P4	0.184075	0.184075	1.7464	0.0961815	0.737144	-4.56646
RELA	0.145178	0.145178	1.74617	0.096223	0.737144	-4.56681
NLRP6	0.135465	0.135465	1.74556	0.096331	0.737361	-4.5677
PDZRN3	0.154051	0.154051	1.7448	0.0964655	0.737791	-4.56881
NT5C2	0.261399	0.261399	1.74443	0.0965329	0.737791	-4.56937
CHST14	0.138518	0.138518	1.7444	0.0965371	0.737791	-4.5694
GABARAPL3	0.136759	0.136759	1.74428	0.0965584	0.737791	-4.56958
ANGPT1	0.175273	0.175273	1.7441	0.0965909	0.737791	-4.56985
HOXB-AS4	0.131895	0.131895	1.74327	0.0967386	0.737959	-4.57106
SEC14L6	0.132861	0.132861	1.74219	0.0969318	0.738402	-4.57265
CACNA1C	0.229505	0.229505	1.74187	0.0969898	0.738637	-4.57312
PHLDB2	0.297633	0.297633	1.74077	0.0971862	0.739459	-4.57473
COTL1	0.16028	0.16028	1.73817	0.0976528	0.739964	-4.57854
DIO3OS	0.152325	0.152325	1.73803	0.0976775	0.739964	-4.57874
WIPF3	0.156527	0.156527	1.73692	0.0978774	0.739964	-4.58037
GNB1	0.214287	0.214287	1.73679	0.0979009	0.739964	-4.58056
GPC6-AS2	0.155026	0.155026	1.73664	0.0979277	0.739964	-4.58078
NAV2-IT1	0.157754	0.157754	1.73649	0.0979548	0.739964	-4.581
SERTAD4-AS1	0.220381	0.220381	1.73622	0.0980042	0.739964	-4.5814
ZCWPW2	0.160833	0.160833	1.73581	0.098077	0.739993	-4.58199
CYB5R3	0.178049	0.178049	1.73479	0.0982622	0.739993	-4.58349
YIPF1	0.177282	0.177282	1.73477	0.0982657	0.739993	-4.58351
OSMR-AS1	0.160656	0.160656	1.73418	0.0983718	0.739993	-4.58437
ZNF48	0.14744	0.14744	1.73401	0.0984026	0.739993	-4.58462
COL14A1	0.457908	0.457908	1.73385	0.0984317	0.739993	-4.58485
PSTPIP2	0.17364	0.17364	1.73355	0.0984872	0.739993	-4.5853
LRCH2	0.145606	0.145606	1.73324	0.0985422	0.739993	-4.58575
TERF2IP	0.17369	0.17369	1.73289	0.0986072	0.739993	-4.58627
CDH12P4	0.140977	0.140977	1.73141	0.0988757	0.739993	-4.58843
PCYT1B-AS1	0.150017	0.150017	1.73139	0.0988792	0.739993	-4.58846
SS18	0.180272	0.180272	1.73129	0.0988962	0.739993	-4.58859
CER1	0.138129	0.138129	1.73106	0.0989384	0.739993	-4.58893
TWF2	0.153718	0.153718	1.73029	0.0990796	0.739993	-4.59007
HAPLN2	0.119334	0.119334	1.73017	0.0991001	0.739993	-4.59023
SUCLG2-AS1	0.183209	0.183209	1.72993	0.099144	0.739993	-4.59058
AK4P3	0.153919	0.153919	1.72992	0.0991464	0.739993	-4.5906
TSC22D1	0.201335	0.201335	1.72982	0.0991655	0.739993	-4.59075
CFI	0.251423	0.251423	1.7294	0.0992405	0.739993	-4.59135
TMPRSS5	0.173719	0.173719	1.72827	0.0994475	0.739993	-4.59301
IGHVII-40-1	0.156185	0.156185	1.72797	0.0995027	0.739993	-4.59345
KCNQ1-AS1	0.158508	0.158508	1.7275	0.0995885	0.739993	-4.59413
COL8A2	0.142635	0.142635	1.72745	0.0995968	0.739993	-4.5942
RCAN1	0.257245	0.257245	1.72668	0.0997376	0.739993	-4.59532
UBE2Q2P11	0.154856	0.154856	1.72658	0.0997576	0.739993	-4.59548
GPN2	0.153732	0.153732	1.72652	0.0997675	0.739993	-4.59556
DHX38	0.144423	0.144423	1.72597	0.099868	0.739993	-4.59636
GAS7	0.207383	0.207383	1.72596	0.0998707	0.739993	-4.59638
ATG9B	0.147073	0.147073	1.72573	0.099912	0.739993	-4.59671
SNORA16B	0.16626	0.16626	1.72554	0.0999468	0.739993	-4.59698
SPATA31D3	0.143971	0.143971	1.72499	0.100048	0.739993	-4.59779
C22orf31	0.152799	0.152799	1.72406	0.100219	0.739993	-4.59914
IGHV1OR16-4	0.157624	0.157624	1.72373	0.10028	0.739993	-4.59962
XIRP2-AS1	0.16709	0.16709	1.72364	0.100297	0.739993	-4.59976
ERG	0.168827	0.168827	1.72344	0.100334	0.739993	-4.60005
OR52P1P	0.153721	0.153721	1.7233	0.100359	0.739993	-4.60025
TRO	0.290943	0.290943	1.72303	0.10041	0.739993	-4.60065
ADAMTS9-AS1	0.157714	0.157714	1.72298	0.100419	0.739993	-4.60072
SVEP1	0.222859	0.222859	1.72294	0.100425	0.739993	-4.60077
HIGD1AP6	0.15409	0.15409	1.72294	0.100426	0.739993	-4.60078
CPTP	0.165511	0.165511	1.72291	0.100432	0.739993	-4.60082
INPPL1	0.182137	0.182137	1.72225	0.100553	0.740027	-4.60178
WHAMMP2	0.138436	0.138436	1.72213	0.100575	0.740027	-4.60195
SNORA13	0.159945	0.159945	1.72207	0.100587	0.740027	-4.60204
OR7E94P	0.128393	0.128393	1.72197	0.100604	0.740027	-4.60218
SLC28A1	0.150934	0.150934	1.72162	0.100669	0.740027	-4.60269
XAB2	0.143862	0.143862	1.72142	0.100706	0.740091	-4.60298
SPRR2G	0.1483	0.1483	1.72104	0.100776	0.740091	-4.60354
HSPA8P4	0.175133	0.175133	1.72084	0.100813	0.740091	-4.60382
SLC7A6	0.213207	0.213207	1.71849	0.101248	0.740401	-4.60724
SOBP	0.224475	0.224475	1.71842	0.101262	0.740401	-4.60735
PCAT1	0.153121	0.153121	1.71723	0.101483	0.740401	-4.60908
SNORD116-19	0.238978	0.238978	1.7166	0.1016	0.740401	-4.60999
PCNPP2	0.116615	0.116615	1.71643	0.101632	0.740401	-4.61024
SRGAP2	0.197911	0.197911	1.71596	0.101719	0.740401	-4.61092
PTPRS	0.170845	0.170845	1.71556	0.101794	0.740401	-4.6115
BANF1P2	0.146712	0.146712	1.71527	0.101848	0.740401	-4.61192
CD68	0.187579	0.187579	1.71523	0.101855	0.740401	-4.61197
BEX1	0.132578	0.132578	1.71467	0.10196	0.740401	-4.6128
MRPL2	0.183931	0.183931	1.71387	0.102108	0.740401	-4.61395
TCEA1P3	0.164895	0.164895	1.71385	0.102113	0.740401	-4.61398
SNRPGP7	0.143098	0.143098	1.71347	0.102184	0.740401	-4.61453
NLRC4	0.204086	0.204086	1.71343	0.102191	0.740401	-4.61458
VPS9D1	0.176982	0.176982	1.71315	0.102244	0.740401	-4.615
PRRT2	0.15336	0.15336	1.71273	0.102323	0.740623	-4.61561
NIFK-AS1	0.161468	0.161468	1.71156	0.102541	0.741524	-4.61729
PRCD	0.161082	0.161082	1.71035	0.102769	0.741751	-4.61905
LARP1P1	0.155214	0.155214	1.71011	0.102814	0.741751	-4.61939
PAPPA2	0.167427	0.167427	1.70967	0.102898	0.741813	-4.62004
PJA2	0.211913	0.211913	1.70867	0.103085	0.741813	-4.62148
ZNF205	0.148751	0.148751	1.70691	0.103418	0.742568	-4.62403
CKAP4	0.159919	0.159919	1.70675	0.103448	0.742568	-4.62426
RASGRP1	0.302928	0.302928	1.70642	0.10351	0.742568	-4.62474
ULK4P1	0.202555	0.202555	1.70515	0.10375	0.742568	-4.62657
NELFCD	0.172819	0.172819	1.70471	0.103833	0.742568	-4.6272
CPXM2	0.231084	0.231084	1.70446	0.103881	0.742641	-4.62756
RSAD1	0.144584	0.144584	1.7037	0.104026	0.742898	-4.62867
WDFY3	0.154269	0.154269	1.7029	0.104178	0.742898	-4.62982
TRAV15	0.164202	0.164202	1.70218	0.104314	0.742898	-4.63085
ARHGEF17	0.1649	0.1649	1.70215	0.10432	0.742898	-4.6309
SYNM	0.159814	0.159814	1.70191	0.104366	0.742898	-4.63125
SNRPGP13	0.170416	0.170416	1.70159	0.104426	0.742953	-4.6317
CAP2P1	0.142278	0.142278	1.70043	0.104648	0.743037	-4.63338
IGKV2-36	0.159704	0.159704	1.69988	0.104753	0.743067	-4.63418
MPDZ	0.149584	0.149584	1.69986	0.104757	0.743067	-4.6342
HDX	0.184231	0.184231	1.69952	0.104823	0.743202	-4.6347
SYNE3	0.131339	0.131339	1.69948	0.10483	0.743202	-4.63475
MTND1P2	0.155474	0.155474	1.69887	0.104945	0.743344	-4.63562
HDAC10	0.13941	0.13941	1.69747	0.105214	0.744047	-4.63764
TBCAP2	0.18628	0.18628	1.69743	0.105222	0.744047	-4.6377
EGR2	0.261431	0.261431	1.69712	0.105281	0.744272	-4.63814
SVIL-AS1	0.2755	0.2755	1.69591	0.105514	0.745148	-4.63989
HERC2P4	0.140075	0.140075	1.69526	0.10564	0.745298	-4.64083
CD300A	0.213886	0.213886	1.69498	0.105692	0.745298	-4.64122
RPL7P43	0.139958	0.139958	1.69441	0.105803	0.745298	-4.64205
RBMY2EP	0.140064	0.140064	1.6943	0.105823	0.745298	-4.6422
CDC42BPB	0.21872	0.21872	1.69414	0.105855	0.745298	-4.64244
ABHD6	0.161057	0.161057	1.69411	0.10586	0.745298	-4.64248
ZNF32-AS1	0.132998	0.132998	1.69389	0.105904	0.745298	-4.6428
NRBF2	0.169678	0.169678	1.69383	0.105915	0.745298	-4.64288
KRT17	0.152597	0.152597	1.69377	0.105926	0.745298	-4.64297
TIMM17BP1	0.140827	0.140827	1.69338	0.106002	0.745298	-4.64353
GIMAP4	0.133522	0.133522	1.69307	0.106061	0.745345	-4.64397
RBM24	0.17411	0.17411	1.69281	0.106111	0.745378	-4.64435
ADAMTSL4-AS1	0.169865	0.169865	1.6922	0.106229	0.745459	-4.64523
HCFC1R1	0.134345	0.134345	1.6911	0.106441	0.746483	-4.6468
C19orf54	0.142304	0.142304	1.68954	0.106744	0.746716	-4.64904
PLA2G15	0.148844	0.148844	1.68944	0.106763	0.746716	-4.64918
NPAP1P3	0.157461	0.157461	1.68889	0.10687	0.746716	-4.64997
SGPL1	0.146019	0.146019	1.68881	0.106886	0.746716	-4.65009
CPEB2	0.171188	0.171188	1.68834	0.106977	0.746716	-4.65076
ZNF354B	0.150753	0.150753	1.68827	0.106992	0.746716	-4.65087
PIGPP4	0.134269	0.134269	1.68819	0.107007	0.746716	-4.65098
ANXA8L1	0.19915	0.19915	1.68818	0.107009	0.746716	-4.65099
CLDN16	0.170921	0.170921	1.68784	0.107074	0.746716	-4.65147
SRY	0.187648	0.187648	1.68653	0.10733	0.747588	-4.65335
ESYT3	0.146576	0.146576	1.68632	0.107371	0.747625	-4.65366
HEIH	0.143112	0.143112	1.68584	0.107466	0.747905	-4.65435
WDR91	0.170678	0.170678	1.68541	0.107548	0.747907	-4.65496
DENND5A	0.201199	0.201199	1.685	0.107629	0.747907	-4.65555
PGM5P4-AS1	0.156348	0.156348	1.68499	0.10763	0.747907	-4.65556
PLK2	0.224027	0.224027	1.6845	0.107726	0.748167	-4.65626
OR5M10	0.156382	0.156382	1.68377	0.10787	0.748167	-4.65731
ARHGEF3-AS1	0.179041	0.179041	1.68367	0.107889	0.748167	-4.65745
TK2	0.200209	0.200209	1.68323	0.107975	0.748167	-4.65808
OR5H14	0.132833	0.132833	1.68315	0.10799	0.748167	-4.65819
RNGTTP1	0.187692	0.187692	1.6828	0.108061	0.748167	-4.6587
CYBRD1	0.41727	0.41727	1.68275	0.10807	0.748167	-4.65877
UBQLN4	0.155331	0.155331	1.6827	0.108079	0.748167	-4.65884
HCG23	0.192029	0.192029	1.68252	0.108115	0.748226	-4.6591
PLEKHD1	0.139339	0.139339	1.68208	0.108201	0.74844	-4.65972
RGS11	0.201672	0.201672	1.68162	0.108292	0.748881	-4.66039
ZMYND19	0.144996	0.144996	1.68064	0.108485	0.74927	-4.66179
HIVEP1	0.195922	0.195922	1.68009	0.108593	0.749636	-4.66258
TBC1D9	0.239152	0.239152	1.67945	0.10872	0.749954	-4.66349
DEPTOR	0.165372	0.165372	1.6787	0.108866	0.750002	-4.66455
SSMEM1	0.150043	0.150043	1.6782	0.108965	0.750258	-4.66527
IGLVIV-53	0.120959	0.120959	1.67808	0.108989	0.750258	-4.66544
PLEKHH2	0.345062	0.345062	1.67795	0.109016	0.750258	-4.66563
DUSP1	0.332094	0.332094	1.67775	0.109054	0.750258	-4.66591
GPR25	0.131115	0.131115	1.67753	0.109098	0.750258	-4.66623
F3	0.392013	0.392013	1.67692	0.109219	0.750258	-4.6671
CCNT2-AS1	0.138345	0.138345	1.67659	0.109285	0.750258	-4.66758
HTT-AS	0.120421	0.120421	1.67654	0.109294	0.750258	-4.66764
PCDH1	0.242951	0.242951	1.67643	0.109315	0.750258	-4.6678
RNF181	0.143159	0.143159	1.67599	0.109402	0.750555	-4.66842
PCDHB14	0.150501	0.150501	1.67348	0.109901	0.751863	-4.672
MILR1	0.231177	0.231177	1.67312	0.109974	0.751863	-4.67252
CBR3-AS1	0.12355	0.12355	1.67284	0.110029	0.751863	-4.67291
IGKV1OR2-3	0.159807	0.159807	1.67197	0.110203	0.752398	-4.67416
AP5S1	0.132026	0.132026	1.67161	0.110274	0.752398	-4.67467
FER1L6-AS2	0.145986	0.145986	1.67147	0.110303	0.752398	-4.67487
NME7	0.178708	0.178708	1.67113	0.11037	0.752533	-4.67535
CORO6	0.140151	0.140151	1.67041	0.110515	0.752533	-4.67638
TERF1P3	0.149945	0.149945	1.66956	0.110685	0.752533	-4.67759
C20orf181	0.143347	0.143347	1.66928	0.11074	0.752533	-4.67798
MICU3	0.176299	0.176299	1.66898	0.1108	0.752533	-4.67841
AP1B1	0.144433	0.144433	1.66896	0.110804	0.752533	-4.67844
ZNF454	0.180295	0.180295	1.66749	0.1111	0.753788	-4.68053
CAHM	0.148165	0.148165	1.66734	0.111128	0.753796	-4.68073
IFNK	0.160853	0.160853	1.66701	0.111195	0.754062	-4.68121
SNORD6	0.241955	0.241955	1.66656	0.111287	0.754311	-4.68186
MDK	0.256882	0.256882	1.6662	0.111359	0.754426	-4.68237
TBCCD1	0.151333	0.151333	1.66539	0.111521	0.754504	-4.68351
STX7	0.176486	0.176486	1.66532	0.111537	0.754504	-4.68362
MSANTD3	0.166688	0.166688	1.66483	0.111635	0.754649	-4.68431
SIGLEC29P	0.164247	0.164247	1.66428	0.111746	0.754774	-4.68509
KCNJ1	0.145616	0.145616	1.66384	0.111836	0.754774	-4.68572
MAGEA9	0.128304	0.128304	1.66378	0.111847	0.754774	-4.6858
STARD8	0.154481	0.154481	1.66375	0.111853	0.754774	-4.68584
RPS26P24	0.160165	0.160165	1.66304	0.111996	0.755318	-4.68684
CCDC93	0.171659	0.171659	1.66247	0.112111	0.755318	-4.68765
POMK	0.147514	0.147514	1.66247	0.112113	0.755318	-4.68766
TRGV1	0.142167	0.142167	1.66226	0.112155	0.755318	-4.68796
DGKZ	0.13045	0.13045	1.6619	0.112226	0.755612	-4.68846
FAM193B	0.155844	0.155844	1.66175	0.112258	0.755628	-4.68868
CALB2	0.222013	0.222013	1.66112	0.112385	0.755932	-4.68957
VAMP2	0.160967	0.160967	1.66004	0.112605	0.756854	-4.6911
TMEM151A	0.152012	0.152012	1.6597	0.112674	0.757054	-4.69158
HLTF-AS1	0.139657	0.139657	1.6593	0.112755	0.7573	-4.69214
TNNC1	0.143267	0.143267	1.65888	0.11284	0.757499	-4.69274
ATP6V1G1P6	0.135091	0.135091	1.65842	0.112935	0.757692	-4.6934
DDX39A	0.158034	0.158034	1.65817	0.112984	0.757692	-4.69374
JAM3	0.210896	0.210896	1.65774	0.113072	0.757692	-4.69435
PHBP9	0.122414	0.122414	1.65712	0.1132	0.757692	-4.69524
SLC22A17	0.14952	0.14952	1.65711	0.113201	0.757692	-4.69525
BLACAT1	0.183528	0.183528	1.65687	0.113251	0.757716	-4.69559
KLRF2	0.160284	0.160284	1.65581	0.113466	0.75807	-4.69708
NR3C1	0.329404	0.329404	1.65429	0.113778	0.75898	-4.69923
PKMYT1	0.157086	0.157086	1.65426	0.113783	0.75898	-4.69927
ZBTB40	0.192722	0.192722	1.65345	0.113951	0.758994	-4.70042
CHRDL1	0.332998	0.332998	1.6528	0.114084	0.75934	-4.70134
BNIP3	0.182341	0.182341	1.65276	0.114092	0.75934	-4.70139
FBXL2	0.270204	0.270204	1.65265	0.114115	0.75934	-4.70155
TGIF2P1	0.131741	0.131741	1.65085	0.114484	0.761388	-4.70408
PPP1R18	0.22868	0.22868	1.65074	0.114507	0.761388	-4.70424
MFAP1P1	0.15214	0.15214	1.6502	0.11462	0.761835	-4.70501
VN1R107P	0.156021	0.156021	1.64974	0.114713	0.761835	-4.70565
MYO9B	0.115939	0.115939	1.64945	0.114773	0.761862	-4.70606
CYP2E1	0.138812	0.138812	1.64929	0.114807	0.761902	-4.70629
RBPMS	0.218066	0.218066	1.64885	0.114898	0.762317	-4.70691
USP9YP33	0.133314	0.133314	1.64864	0.114942	0.762424	-4.70721
GABRB2	0.157581	0.157581	1.64657	0.11537	0.76327	-4.71012
DDAH2	0.177211	0.177211	1.64597	0.115493	0.76327	-4.71096
ENDOU	0.128849	0.128849	1.64506	0.115683	0.76327	-4.71224
TCIRG1	0.173255	0.173255	1.64443	0.115814	0.76327	-4.71313
ASB1	0.163854	0.163854	1.64433	0.115835	0.76327	-4.71327
HSD11B1	0.167038	0.167038	1.64381	0.115943	0.76327	-4.714
THRAP3P1	0.14268	0.14268	1.64349	0.116011	0.76327	-4.71446
SHC1	0.173261	0.173261	1.64303	0.116106	0.76327	-4.7151
FBXW11	0.166917	0.166917	1.64291	0.116131	0.76327	-4.71527
ULK2	0.147964	0.147964	1.64276	0.116163	0.76327	-4.71549
TULP1	0.175885	0.175885	1.64275	0.116164	0.76327	-4.71549
RAB22A	0.146652	0.146652	1.64264	0.116186	0.76327	-4.71564
RIPK1	0.133383	0.133383	1.64234	0.116249	0.76327	-4.71606
MPP1	0.143588	0.143588	1.64223	0.116274	0.76327	-4.71623
C8orf58	0.154237	0.154237	1.64214	0.116291	0.76327	-4.71635
ANKRD20A10P	0.147812	0.147812	1.64213	0.116293	0.76327	-4.71636
INHBB	0.14946	0.14946	1.64206	0.116309	0.76327	-4.71647
OR2L9P	0.164013	0.164013	1.64128	0.116472	0.763791	-4.71756
SURF4	0.150981	0.150981	1.64095	0.11654	0.763935	-4.71802
ZNF331	0.286448	0.286448	1.63978	0.116786	0.764515	-4.71967
PRRX2-AS1	0.135516	0.135516	1.63966	0.11681	0.764515	-4.71983
PAF1	0.11653	0.11653	1.63939	0.116868	0.764515	-4.72022
OSMR	0.215407	0.215407	1.63845	0.117064	0.765455	-4.72153
STK11IP	0.176997	0.176997	1.63741	0.117282	0.765657	-4.72298
THAP9-AS1	0.142491	0.142491	1.63715	0.117338	0.765657	-4.72335
CEP19	0.158389	0.158389	1.63702	0.117366	0.765657	-4.72354
CCL19	0.122521	0.122521	1.63606	0.117566	0.765657	-4.72487
ARID5A	0.157073	0.157073	1.63571	0.117641	0.765657	-4.72537
MPRIP-AS1	0.178842	0.178842	1.63535	0.117716	0.765657	-4.72587
TEAD1	0.144753	0.144753	1.63519	0.117752	0.765657	-4.72611
PRAMENP	0.135544	0.135544	1.63513	0.117764	0.765657	-4.72619
TMEM50B	0.224913	0.224913	1.6347	0.117854	0.765657	-4.72679
CREB3L2	0.2102	0.2102	1.63454	0.117888	0.765657	-4.72701
PPP2R2DP1	0.140625	0.140625	1.6345	0.117897	0.765657	-4.72707
DSC3	0.164683	0.164683	1.63421	0.117958	0.765692	-4.72748
CYP2D8P	0.174028	0.174028	1.63405	0.117991	0.76572	-4.72769
PROP1	0.19013	0.19013	1.63363	0.11808	0.765919	-4.72828
PDE4A	0.228971	0.228971	1.63121	0.118592	0.766608	-4.73166
ZNF185	0.189245	0.189245	1.63105	0.118626	0.766608	-4.73189
JUN	0.198177	0.198177	1.63044	0.118758	0.766774	-4.73275
GGT8P	0.12676	0.12676	1.63028	0.118791	0.766774	-4.73297
ANGPTL7	0.162848	0.162848	1.63023	0.118802	0.766774	-4.73305
COLEC12	0.442187	0.442187	1.63015	0.118817	0.766774	-4.73315
DYRK3	0.195943	0.195943	1.63011	0.118827	0.766774	-4.73321
GTF2A1L	0.199249	0.199249	1.62957	0.118942	0.767333	-4.73396
ASTN2-AS1	0.122079	0.122079	1.62891	0.119083	0.767467	-4.73489
DNAJB8-AS1	0.118801	0.118801	1.62841	0.119189	0.767475	-4.73558
GIPC1	0.126887	0.126887	1.62787	0.119304	0.768034	-4.73634
ANXA2R	0.174365	0.174365	1.62746	0.119391	0.768232	-4.73691
VIM2P	0.149575	0.149575	1.62714	0.11946	0.768419	-4.73736
TLR12P	0.158406	0.158406	1.6269	0.119511	0.768419	-4.73769
FKBP1B	0.119363	0.119363	1.62686	0.11952	0.768419	-4.73775
APC	0.191413	0.191413	1.6263	0.119638	0.768769	-4.73852
DIAPH3-AS2	0.174502	0.174502	1.62539	0.119834	0.768996	-4.73979
FAM197Y3	0.157154	0.157154	1.62527	0.119859	0.768996	-4.73996
FAM197Y2	0.157154	0.157154	1.62527	0.119859	0.768996	-4.73996
ZNF831	0.16019	0.16019	1.6252	0.119876	0.768996	-4.74007
BCLAF1P1	0.139975	0.139975	1.62486	0.119948	0.769245	-4.74054
EGR3	0.31311	0.31311	1.62475	0.119971	0.769245	-4.74069
NKD1	0.157985	0.157985	1.62411	0.120108	0.769765	-4.74158
CTSB	0.314402	0.314402	1.62262	0.120429	0.770953	-4.74366
PHF21A	0.215842	0.215842	1.62258	0.120437	0.770953	-4.74371
ABL2	0.228552	0.228552	1.62154	0.120662	0.771862	-4.74516
GBA	0.175814	0.175814	1.62073	0.120835	0.772578	-4.74629
DLC1	0.208475	0.208475	1.62058	0.120868	0.772578	-4.74649
OR52E7P	0.137765	0.137765	1.61975	0.121047	0.773039	-4.74765
COMMD4	0.194561	0.194561	1.61967	0.121065	0.773039	-4.74776
TMEM235	0.174934	0.174934	1.61936	0.121132	0.773059	-4.7482
WWC2-AS2	0.170292	0.170292	1.61899	0.12121	0.773367	-4.7487
EVI2A	0.260292	0.260292	1.61824	0.121373	0.774055	-4.74975
TMPRSS11F	0.127551	0.127551	1.61774	0.121482	0.774127	-4.75044
TUBB4BP6	0.118995	0.118995	1.6172	0.121598	0.774388	-4.75119
OSTCP2	0.132033	0.132033	1.61706	0.121629	0.774388	-4.75139
GLYCTK-AS1	0.145215	0.145215	1.6163	0.121794	0.774749	-4.75244
WWC1	0.137483	0.137483	1.61554	0.12196	0.775263	-4.75351
AIG1	0.150116	0.150116	1.61466	0.12215	0.775746	-4.75471
SMCO3	0.124996	0.124996	1.61444	0.122198	0.77587	-4.75502
PSEN2	0.146681	0.146681	1.61229	0.122668	0.776238	-4.75801
P2RX1	0.143449	0.143449	1.61217	0.122694	0.776238	-4.75817
PLA2G4A	0.287623	0.287623	1.61216	0.122695	0.776238	-4.75818
GREM2	0.159172	0.159172	1.61205	0.12272	0.776238	-4.75834
SIGLEC28P	0.139151	0.139151	1.61205	0.12272	0.776238	-4.75834
RPS26P54	0.129435	0.129435	1.61194	0.122743	0.776238	-4.75849
RRM2P2	0.140149	0.140149	1.61181	0.122771	0.776238	-4.75867
SEMA3D	0.1664	0.1664	1.61157	0.122824	0.776238	-4.759
MGAT2P1	0.166584	0.166584	1.60993	0.123184	0.776959	-4.76128
BOC	0.184283	0.184283	1.60958	0.12326	0.776959	-4.76176
POM121L6P	0.156453	0.156453	1.60898	0.123392	0.776959	-4.76259
VAV1	0.139527	0.139527	1.60876	0.123441	0.776959	-4.7629
PLK3	0.148644	0.148644	1.6086	0.123476	0.776959	-4.76312
ALPP	0.122724	0.122724	1.60807	0.123591	0.776959	-4.76385
EBF2	0.187023	0.187023	1.60788	0.123634	0.776959	-4.76411
SLC25A12	0.1792	0.1792	1.60784	0.123643	0.776959	-4.76417
SIRPB2	0.130576	0.130576	1.60777	0.123657	0.776959	-4.76426
KCTD7	0.1315	0.1315	1.60745	0.123729	0.776959	-4.76471
TDGF1P7	0.181079	0.181079	1.60737	0.123746	0.776959	-4.76482
AGRN	0.176899	0.176899	1.6072	0.123783	0.776959	-4.76505
JRK	0.135177	0.135177	1.60716	0.123793	0.776959	-4.76511
FAM160B2	0.160373	0.160373	1.60701	0.123824	0.776959	-4.76531
IGHV7-56	0.176842	0.176842	1.60672	0.123888	0.776959	-4.76571
PXDN	0.154751	0.154751	1.60633	0.123974	0.776959	-4.76625
HSD17B1P1	0.13778	0.13778	1.6063	0.123982	0.776959	-4.7663
ZNF546	0.155998	0.155998	1.60547	0.124165	0.776959	-4.76745
VSIG10L	0.17192	0.17192	1.60542	0.124176	0.776959	-4.76751
EGR1	0.298143	0.298143	1.60522	0.124219	0.776959	-4.76778
PRKCZ	0.147274	0.147274	1.6043	0.124423	0.777108	-4.76906
PCAT4	0.154045	0.154045	1.60429	0.124424	0.777108	-4.76907
PRSS54	0.16737	0.16737	1.6032	0.124667	0.77776	-4.77059
KIF4CP	0.129463	0.129463	1.6031	0.124689	0.77776	-4.77072
SLC2A1	0.227176	0.227176	1.60159	0.125024	0.778249	-4.7728
PSG9	0.141705	0.141705	1.60058	0.125248	0.778932	-4.77419
KRT17P2	0.134039	0.134039	1.60027	0.125316	0.779005	-4.77462
UBTFL2	0.14471	0.14471	1.60012	0.125351	0.779039	-4.77483
OR2U2P	0.115265	0.115265	1.59898	0.125604	0.779726	-4.7764
ASMTL-AS1	0.122561	0.122561	1.5987	0.125667	0.779913	-4.77679
IGBP1P5	0.164544	0.164544	1.59676	0.1261	0.780393	-4.77946
MAF	0.204669	0.204669	1.59673	0.126106	0.780393	-4.77949
ZNF965P	0.144735	0.144735	1.59668	0.126116	0.780393	-4.77956
SARS2	0.135299	0.135299	1.59662	0.12613	0.780393	-4.77964
ATL1	0.112432	0.112432	1.59637	0.126186	0.780406	-4.77999
TSKU	0.127723	0.127723	1.59623	0.126218	0.780406	-4.78018
IGKV1OR2-118	0.196981	0.196981	1.59507	0.126478	0.781172	-4.78178
TRAM2	0.162044	0.162044	1.5945	0.126605	0.781172	-4.78256
MEIS1	0.267823	0.267823	1.59449	0.126608	0.781172	-4.78258
WBP1LP6	0.146546	0.146546	1.59354	0.126821	0.781658	-4.78388
HSPA12A	0.168662	0.168662	1.59335	0.126862	0.781658	-4.78413
CA5BP1	0.164374	0.164374	1.59323	0.126891	0.781658	-4.78431
GOLGA8CP	0.127083	0.127083	1.59274	0.127	0.781658	-4.78497
SHC1P2	0.194438	0.194438	1.59273	0.127002	0.781658	-4.78499
KIFC2	0.131143	0.131143	1.59269	0.127011	0.781658	-4.78504
ADAMTS7	0.213053	0.213053	1.59203	0.127161	0.781658	-4.78596
RARRES2P10	0.121631	0.121631	1.59186	0.127199	0.781658	-4.78619
ZNF391	0.144359	0.144359	1.5914	0.127303	0.781658	-4.78682
TECRP2	0.160275	0.160275	1.59139	0.127305	0.781658	-4.78683
SIAH3	0.143299	0.143299	1.59137	0.127309	0.781658	-4.78686
COX6CP14	0.15455	0.15455	1.59122	0.127343	0.781658	-4.78707
FNDC1	0.187966	0.187966	1.59001	0.127615	0.781658	-4.78872
C2CD2	0.209839	0.209839	1.58964	0.127699	0.781658	-4.78923
SMIM12P1	0.142116	0.142116	1.58949	0.127733	0.781658	-4.78944
DMPK	0.111983	0.111983	1.58948	0.127736	0.781658	-4.78945
GPR55	0.129953	0.129953	1.58945	0.127742	0.781658	-4.78949
KAT8	0.158581	0.158581	1.58934	0.127766	0.781658	-4.78964
RNF169	0.171481	0.171481	1.58889	0.127869	0.781705	-4.79026
FMO4	0.142545	0.142545	1.58839	0.127981	0.782035	-4.79094
TTC28	0.183052	0.183052	1.58742	0.128201	0.783032	-4.79227
PLIN1	0.205794	0.205794	1.58692	0.128315	0.783202	-4.79296
RASGRP2	0.123019	0.123019	1.58652	0.128406	0.783252	-4.79351
TRIM64DP	0.145389	0.145389	1.5865	0.12841	0.783252	-4.79353
DGKB	0.175188	0.175188	1.5858	0.128569	0.783695	-4.79449
PYHIN5P	0.145831	0.145831	1.58569	0.128594	0.783695	-4.79464
ABCD1P2	0.132159	0.132159	1.58419	0.128936	0.783695	-4.7967
DNHD1	0.142058	0.142058	1.58353	0.129087	0.783695	-4.7976
ZNF709	0.148822	0.148822	1.58324	0.129151	0.783695	-4.79799
RSAD2	0.182503	0.182503	1.58295	0.129218	0.783695	-4.79839
APBB1	0.135937	0.135937	1.58291	0.129226	0.783695	-4.79844
HMGB3P7	0.14646	0.14646	1.58268	0.129279	0.783695	-4.79876
ARHGAP22	0.150759	0.150759	1.5826	0.129299	0.783695	-4.79887
MAP2K1	0.151301	0.151301	1.58189	0.12946	0.783695	-4.79984
CDK4	0.121895	0.121895	1.58144	0.129562	0.783695	-4.80045
IFNWP9	0.12975	0.12975	1.58089	0.129689	0.783695	-4.80121
ZNF734P	0.119861	0.119861	1.58058	0.12976	0.783695	-4.80163
ARF4	0.243312	0.243312	1.58027	0.129832	0.783695	-4.80206
SLC12A4	0.163092	0.163092	1.5801	0.129871	0.783695	-4.80229
SRGN	0.286865	0.286865	1.57998	0.129896	0.783695	-4.80244
HMGB3P26	0.156235	0.156235	1.57942	0.130026	0.783695	-4.80322
PZP	0.128095	0.128095	1.57884	0.130159	0.783695	-4.80401
LYVE1	0.195376	0.195376	1.5787	0.130191	0.783695	-4.8042
ZFP36L1	0.159645	0.159645	1.57858	0.130219	0.783695	-4.80436
FKBP6	0.136329	0.136329	1.5782	0.130305	0.783695	-4.80487
IGLV3-21	0.17659	0.17659	1.5782	0.130306	0.783695	-4.80487
HOXA-AS2	0.172045	0.172045	1.57801	0.130349	0.783695	-4.80513
SHROOM4	0.167512	0.167512	1.57792	0.130371	0.783695	-4.80526
MED28P2	0.154098	0.154098	1.57761	0.130442	0.783695	-4.80568
MLC1	0.140028	0.140028	1.57731	0.130511	0.783695	-4.8061
ELK3	0.151803	0.151803	1.57704	0.130572	0.783695	-4.80645
NFKB2	0.153734	0.153734	1.57698	0.130586	0.783695	-4.80654
RNF11	0.167336	0.167336	1.57621	0.130764	0.784011	-4.80759
SNX32	0.124581	0.124581	1.57583	0.130851	0.784011	-4.8081
IQSEC2	0.119741	0.119741	1.57514	0.131011	0.784011	-4.80905
THSD7A	0.205457	0.205457	1.57512	0.131014	0.784011	-4.80907
TNFSF8	0.166766	0.166766	1.5749	0.131066	0.784011	-4.80937
KRT18P6	0.133806	0.133806	1.57489	0.131067	0.784011	-4.80938
FGD6	0.24342	0.24342	1.57475	0.131101	0.784011	-4.80958
OR4A44P	0.119501	0.119501	1.57465	0.131124	0.784011	-4.80972
KRT8P41	0.130575	0.130575	1.57388	0.131303	0.784097	-4.81077
AKT1S1	0.117786	0.117786	1.57352	0.131386	0.784097	-4.81126
URGCP	0.163066	0.163066	1.57329	0.131437	0.784097	-4.81156
NR1H2	0.227991	0.227991	1.57268	0.13158	0.784097	-4.8124
IQCB2P	0.12987	0.12987	1.57263	0.13159	0.784097	-4.81246
HSD17B1	0.149092	0.149092	1.57182	0.131779	0.784097	-4.81356
NNMT	0.151235	0.151235	1.57175	0.131795	0.784097	-4.81366
ANKRD34C-AS1	0.131836	0.131836	1.57085	0.132004	0.784097	-4.81488
ASAP1-IT1	0.188958	0.188958	1.57071	0.132036	0.784097	-4.81507
GGNBP1	0.122787	0.122787	1.57061	0.13206	0.784097	-4.81521
CYP2G1P	0.148589	0.148589	1.56996	0.13221	0.784097	-4.81609
RFX8	0.179152	0.179152	1.56965	0.132282	0.784097	-4.81651
CYP4A44P	0.135245	0.135245	1.56963	0.132286	0.784097	-4.81653
GUSBP10	0.157437	0.157437	1.5695	0.132317	0.784097	-4.81671
UBQLN4P2	0.142272	0.142272	1.56943	0.132334	0.784097	-4.81681
SMYD3	0.164687	0.164687	1.56938	0.132345	0.784097	-4.81687
SLC35G2	0.130953	0.130953	1.56928	0.132368	0.784097	-4.81701
NT5CP2	0.12234	0.12234	1.5692	0.132387	0.784097	-4.81712
HCG9P5	0.129477	0.129477	1.56885	0.132468	0.784097	-4.81759
RFPL3S	0.151133	0.151133	1.56877	0.132488	0.784097	-4.81771
DYDC2	0.13954	0.13954	1.56867	0.132512	0.784097	-4.81785
BST2	0.31688	0.31688	1.56842	0.132569	0.784097	-4.81818
MORC1	0.145198	0.145198	1.56789	0.132692	0.784098	-4.8189
TSPYL5	0.141516	0.141516	1.56775	0.132726	0.784098	-4.8191
B3GALNT1P1	0.135052	0.135052	1.56768	0.132742	0.784098	-4.81919
ATP13A4-AS1	0.148748	0.148748	1.56637	0.133048	0.785275	-4.82096
GDPD1	0.155057	0.155057	1.56603	0.133126	0.785275	-4.82142
KCTD9P6	0.149908	0.149908	1.56581	0.133179	0.785275	-4.82172
WWC2	0.185622	0.185622	1.56575	0.133192	0.785275	-4.8218
DAPK3	0.124868	0.124868	1.56568	0.133208	0.785275	-4.82189
CNN3P1	0.152209	0.152209	1.5656	0.133228	0.785275	-4.82201
CYCSP30	0.131119	0.131119	1.56519	0.133325	0.785675	-4.82257
PKD1P6	0.225787	0.225787	1.56429	0.133534	0.786228	-4.82378
PLXDC1	0.20597	0.20597	1.564	0.133603	0.786464	-4.82417
PDE4DIP	0.135232	0.135232	1.56372	0.133669	0.786517	-4.82456
SPAG5	0.137553	0.137553	1.56318	0.133796	0.786537	-4.82529
CDC42BPA	0.137209	0.137209	1.56309	0.133816	0.786537	-4.82541
RAB23	0.228283	0.228283	1.56277	0.133892	0.786537	-4.82584
GUCY2F	0.150602	0.150602	1.56207	0.134056	0.786755	-4.82678
TUG1	0.141526	0.141526	1.56169	0.134145	0.78711	-4.8273
TGFB2	0.24118	0.24118	1.56101	0.134305	0.787621	-4.82822
DEGS1	0.160145	0.160145	1.56096	0.134318	0.787621	-4.82829
PSAT1P2	0.116999	0.116999	1.56002	0.13454	0.7884	-4.82956
FKBP7	0.239138	0.239138	1.55949	0.134664	0.7884	-4.83028
ODF2L	0.239158	0.239158	1.55892	0.134799	0.7884	-4.83105
MARK2P8	0.162914	0.162914	1.55887	0.134811	0.7884	-4.83111
CYP1B1-AS1	0.152015	0.152015	1.55876	0.134836	0.7884	-4.83126
ANGEL1	0.148048	0.148048	1.55844	0.134912	0.7884	-4.83169
MOS	0.138421	0.138421	1.55798	0.135021	0.7884	-4.83232
KRTAP5-AS1	0.140044	0.140044	1.55782	0.135059	0.7884	-4.83253
BTF3L4P4	0.134715	0.134715	1.55781	0.135061	0.7884	-4.83254
FASTK	0.136461	0.136461	1.55713	0.135221	0.788599	-4.83346
ZYX	0.148924	0.148924	1.55695	0.135265	0.788599	-4.83371
MTMR2	0.147567	0.147567	1.5565	0.135373	0.788599	-4.83432
NPRL3	0.136834	0.136834	1.55643	0.135388	0.788599	-4.83441
MED9	0.156174	0.156174	1.55636	0.135406	0.788599	-4.83451
NKX2-2-AS1	0.127031	0.127031	1.55624	0.135435	0.788599	-4.83467
TRAPPC13P1	0.134742	0.134742	1.55622	0.135438	0.788599	-4.83469
RHEBP2	0.156872	0.156872	1.55474	0.135789	0.790136	-4.83668
WDR53	0.145671	0.145671	1.55459	0.135825	0.790176	-4.83689
GPX1	0.136696	0.136696	1.55406	0.135951	0.790742	-4.8376
MEOX2	0.12332	0.12332	1.5539	0.13599	0.790799	-4.83782
PPP1R14BP2	0.126597	0.126597	1.55354	0.136075	0.790868	-4.8383
FSIP1	0.174577	0.174577	1.55271	0.136274	0.790868	-4.83943
RAPGEF1	0.165504	0.165504	1.55267	0.136284	0.790868	-4.83948
IGLL3P	0.125357	0.125357	1.55266	0.136284	0.790868	-4.83949
VDAC2P2	0.124373	0.124373	1.55237	0.136354	0.790868	-4.83988
FAM43B	0.132424	0.132424	1.5521	0.13642	0.790868	-4.84025
SSX3	0.156936	0.156936	1.55204	0.136434	0.790868	-4.84033
BCAR3	0.164626	0.164626	1.55183	0.136483	0.790868	-4.84061
UBE2R2-AS1	0.138816	0.138816	1.55168	0.136519	0.790868	-4.84081
BMP8B	0.162814	0.162814	1.55068	0.136757	0.791007	-4.84215
LUZP2	0.148227	0.148227	1.5503	0.136849	0.791007	-4.84267
TMEM109	0.137862	0.137862	1.55028	0.136853	0.791007	-4.84269
JUNB	0.147208	0.147208	1.55019	0.136876	0.791007	-4.84282
AFF2-IT1	0.217167	0.217167	1.55017	0.136881	0.791007	-4.84285
VWA8P1	0.136277	0.136277	1.54939	0.137068	0.791047	-4.8439
CRTC3	0.177424	0.177424	1.54913	0.13713	0.791047	-4.84424
DDX50	0.131821	0.131821	1.5491	0.137136	0.791047	-4.84428
AR	0.126829	0.126829	1.54857	0.137263	0.791047	-4.84499
OR4K3	0.15398	0.15398	1.54852	0.137275	0.791047	-4.84505
C11orf95	0.112384	0.112384	1.54809	0.13738	0.791047	-4.84564
RHBDF2	0.135889	0.135889	1.54752	0.137516	0.791103	-4.84641
CSNK1G2-AS1	0.132241	0.132241	1.54735	0.137558	0.791103	-4.84664
EFS	0.134149	0.134149	1.54698	0.137645	0.79132	-4.84712
TLN1	0.152822	0.152822	1.54675	0.1377	0.791368	-4.84743
FGF7	0.239921	0.239921	1.5467	0.137712	0.791368	-4.8475
PGM5P3-AS1	0.12552	0.12552	1.5458	0.13793	0.792128	-4.84872
LMNA	0.132625	0.132625	1.54545	0.138014	0.792255	-4.84918
SEL1L	0.183983	0.183983	1.54534	0.13804	0.792255	-4.84933
CLEC5A	0.142535	0.142535	1.54491	0.138143	0.792345	-4.8499
CD1D	0.117549	0.117549	1.54481	0.138168	0.792345	-4.85004
GCC1	0.117726	0.117726	1.54455	0.138231	0.792345	-4.85039
VPS26BP1	0.14129	0.14129	1.54364	0.138451	0.792345	-4.85161
RANP8	0.144473	0.144473	1.54337	0.138516	0.792345	-4.85197
C1QTNF1	0.136377	0.136377	1.54307	0.138589	0.792345	-4.85238
CTIF	0.157882	0.157882	1.54304	0.138596	0.792345	-4.85242
CFP	0.126616	0.126616	1.54295	0.138618	0.792345	-4.85254
TPBG	0.204044	0.204044	1.54253	0.138718	0.792345	-4.85309
ALG9-IT1	0.141319	0.141319	1.54248	0.138732	0.792345	-4.85317
LRRC37A17P	0.136904	0.136904	1.54222	0.138793	0.792345	-4.85351
PPBP	0.147301	0.147301	1.54218	0.138805	0.792345	-4.85357
ZDHHC5	0.151068	0.151068	1.54206	0.138834	0.792345	-4.85374
S100A4	0.280468	0.280468	1.54204	0.138839	0.792345	-4.85376
CLEC18C	0.139459	0.139459	1.54141	0.13899	0.792461	-4.8546
USP11	0.174771	0.174771	1.54105	0.139079	0.792461	-4.85509
PTGES	0.12842	0.12842	1.54094	0.139106	0.792461	-4.85524
CCM2	0.210307	0.210307	1.54008	0.139314	0.792461	-4.85638
TSPY2	0.127657	0.127657	1.53924	0.139518	0.792461	-4.85751
DYNC1I2P1	0.129366	0.129366	1.53895	0.139589	0.792461	-4.8579
SNX17	0.13664	0.13664	1.53892	0.139596	0.792461	-4.85794
RASA3	0.17197	0.17197	1.53884	0.139614	0.792461	-4.85804
SIL1	0.157024	0.157024	1.53821	0.139768	0.792461	-4.85888
KRT16P2	0.124914	0.124914	1.53768	0.139897	0.792461	-4.85959
SDC4P	0.132206	0.132206	1.53718	0.14002	0.792461	-4.86026
ZDHHC6	0.176282	0.176282	1.53666	0.140147	0.792687	-4.86096
CMTM7	0.204878	0.204878	1.53643	0.140203	0.792692	-4.86127
MAGED4B	0.160723	0.160723	1.53634	0.140224	0.792692	-4.86138
GHRHR	0.131232	0.131232	1.53603	0.1403	0.792692	-4.8618
RBSN	0.136869	0.136869	1.53601	0.140306	0.792692	-4.86183
CTDSP2	0.156999	0.156999	1.53591	0.14033	0.792692	-4.86196
U2AF1L4	0.113811	0.113811	1.5357	0.14038	0.792692	-4.86223
SPATA45	0.150964	0.150964	1.53532	0.140473	0.792822	-4.86274
RAB42P1	0.127063	0.127063	1.53497	0.14056	0.792935	-4.86322
TRGV6	0.140616	0.140616	1.53467	0.140634	0.793139	-4.86362
RAP1BP2	0.130413	0.130413	1.53421	0.140746	0.793179	-4.86423
MYL12AP1	0.164932	0.164932	1.53394	0.140812	0.793179	-4.86459
UNC45A	0.161544	0.161544	1.53296	0.141053	0.793535	-4.8659
PTPRJ	0.19136	0.19136	1.53242	0.141184	0.793705	-4.86661
PPEF1-AS1	0.105811	0.105811	1.53181	0.141333	0.793705	-4.86742
EIF4EP4	0.131132	0.131132	1.53119	0.141487	0.793705	-4.86825
ALOX15P2	0.144672	0.144672	1.53116	0.141494	0.793705	-4.86829
UNC93B8	0.126324	0.126324	1.53113	0.141502	0.793705	-4.86834
OGFRL1	0.198387	0.198387	1.53082	0.141579	0.793705	-4.86875
PURG	0.137753	0.137753	1.53075	0.141596	0.793705	-4.86885
RSPO4	0.122507	0.122507	1.53074	0.141596	0.793705	-4.86885
FLRT2	0.161859	0.161859	1.53042	0.141675	0.793766	-4.86927
TRNP1	0.186626	0.186626	1.53019	0.141732	0.793922	-4.86958
TRAJ60	0.132194	0.132194	1.52858	0.142131	0.794889	-4.87173
CRIP1P2	0.12753	0.12753	1.52855	0.142138	0.794889	-4.87177
BOD1P1	0.127319	0.127319	1.52803	0.142267	0.794913	-4.87247
NDUFB9P1	0.116119	0.116119	1.528	0.142273	0.794913	-4.8725
SNORD33	0.140722	0.140722	1.52751	0.142393	0.795178	-4.87315
GEMIN8P2	0.118625	0.118625	1.52656	0.14263	0.795719	-4.87441
KRT18P48	0.147748	0.147748	1.52625	0.142707	0.795719	-4.87483
GCNT7	0.126536	0.126536	1.52589	0.142796	0.795719	-4.87531
SEMA6B	0.144918	0.144918	1.52585	0.142805	0.795719	-4.87535
SCPEP1	0.158013	0.158013	1.52578	0.142824	0.795719	-4.87546
MGARP	0.167342	0.167342	1.5257	0.142843	0.795719	-4.87556
ZNF192P1	0.119753	0.119753	1.52466	0.143101	0.795745	-4.87694
PLA2G7	0.195378	0.195378	1.52429	0.143194	0.795745	-4.87743
NOG	0.11971	0.11971	1.52427	0.143197	0.795745	-4.87745
POGLUT1	0.141462	0.141462	1.52427	0.143198	0.795745	-4.87746
SDCBP	0.165025	0.165025	1.52417	0.143224	0.795745	-4.87759
NAGA	0.166809	0.166809	1.52387	0.143297	0.79599	-4.87799
TRBV5-3	0.136914	0.136914	1.5237	0.143341	0.796071	-4.87822
COL18A1	0.153363	0.153363	1.5231	0.143489	0.796274	-4.87901
SHANK2-AS2	0.127388	0.127388	1.52296	0.143523	0.796274	-4.87919
MAPT-AS1	0.131779	0.131779	1.52164	0.143852	0.79722	-4.88095
HMGN2P39	0.120486	0.120486	1.52113	0.14398	0.79722	-4.88162
CDH11	0.16707	0.16707	1.52085	0.14405	0.797269	-4.88199
CST9	0.132579	0.132579	1.52084	0.144053	0.797269	-4.88201
SLC26A4-AS1	0.113366	0.113366	1.52069	0.144091	0.797317	-4.88221
LAT2	0.145015	0.145015	1.52043	0.144156	0.797358	-4.88256
HPCAL4	0.169557	0.169557	1.52024	0.144203	0.797358	-4.88281
CFH	0.187523	0.187523	1.51961	0.14436	0.797479	-4.88364
COMMD7	0.15975	0.15975	1.5191	0.144488	0.797479	-4.88432
ACTR3BP3	0.125768	0.125768	1.51882	0.144558	0.797479	-4.88469
CD40	0.147767	0.147767	1.51858	0.144616	0.797479	-4.885
C5orf24	0.143622	0.143622	1.51829	0.144691	0.797482	-4.88539
F2	0.14574	0.14574	1.51827	0.144695	0.797482	-4.88541
RPS23P6	0.13128	0.13128	1.5181	0.144737	0.797501	-4.88563
LAIR1	0.200337	0.200337	1.51775	0.144826	0.797669	-4.8861
KCNJ12	0.127554	0.127554	1.51746	0.144898	0.797701	-4.88648
ATRN	0.160017	0.160017	1.51702	0.145008	0.797706	-4.88706
MTHFD1L	0.141563	0.141563	1.51644	0.145155	0.797921	-4.88784
RRAGD	0.222537	0.222537	1.51598	0.145269	0.797921	-4.88844
B4GALNT4	0.127642	0.127642	1.51571	0.145339	0.797921	-4.8888
TMEM176B	0.143955	0.143955	1.51562	0.14536	0.797921	-4.88892
DPT	0.319694	0.319694	1.51518	0.145471	0.797921	-4.88949
UNC119	0.165042	0.165042	1.51501	0.145515	0.797921	-4.88973
KIRREL3-AS1	0.123745	0.123745	1.5146	0.145619	0.797921	-4.89027
MMP26	0.131763	0.131763	1.51454	0.145632	0.797921	-4.89034
TDGP1	0.176653	0.176653	1.51394	0.145785	0.798026	-4.89114
TBC1D3P4	0.129272	0.129272	1.51389	0.145797	0.798026	-4.89121
COL15A1	0.10496	0.10496	1.51373	0.145838	0.798091	-4.89142
MYH15	0.129108	0.129108	1.51301	0.146018	0.798313	-4.89236
PPP1R2	0.168045	0.168045	1.51287	0.146053	0.798313	-4.89254
PCCA	0.182884	0.182884	1.51237	0.14618	0.798313	-4.89321
ESRRAP2	0.168996	0.168996	1.51209	0.146252	0.798313	-4.89358
NPC2	0.189389	0.189389	1.51199	0.146277	0.798313	-4.89371
TRMT112P3	0.114439	0.114439	1.51197	0.146281	0.798313	-4.89373
RPL3P10	0.148422	0.148422	1.51183	0.146318	0.798313	-4.89393
SURF2	0.128689	0.128689	1.5106	0.146629	0.799053	-4.89555
RHOC	0.192996	0.192996	1.51015	0.146743	0.799358	-4.89614
SDK1	0.129331	0.129331	1.50934	0.146949	0.799599	-4.89721
WEE2-AS1	0.115014	0.115014	1.50863	0.147128	0.800016	-4.89814
FCGR2B	0.231993	0.231993	1.50825	0.147225	0.80016	-4.89864
SNAI1	0.130045	0.130045	1.50811	0.14726	0.80016	-4.89882
CD300LG	0.132141	0.132141	1.50797	0.147296	0.80016	-4.89901
SLC35A2	0.152302	0.152302	1.50794	0.147304	0.80016	-4.89905
CDON	0.186722	0.186722	1.50734	0.147455	0.800681	-4.89983
[truncated: 25,303 more rows]

## Sheet: MU
Gene	logFC	AveExpr	t	P.Value	adj.P.Val	B
ARF4	0.542706	0.542706	7.42053	1.21731e-07	0.000830876	6.84429
MUC2	1.24155	1.24155	6.93701	3.71771e-07	0.00156447	5.95531
SULF1	1.0258	1.0258	6.79447	5.19609e-07	0.00157626	5.68564
FNDC1	0.461448	0.461448	6.14305	2.47536e-06	0.00675822	4.41096
LOXL1	0.855198	0.855198	6.00901	3.43324e-06	0.0085213	4.1405
LGALS1	0.721967	0.721967	5.88883	4.61057e-06	0.0101879	3.8958
ANTXR1	0.97839	0.97839	5.86816	4.85101e-06	0.0101879	3.85353
BGN	1.01763	1.01763	5.74972	6.49728e-06	0.0126706	3.61006
COL12A1	0.91071	0.91071	5.71968	6.99853e-06	0.0127383	3.54802
PALLD	0.601174	0.601174	5.59338	9.57357e-06	0.0163361	3.28588
MEG8	0.442212	0.442212	5.45503	1.35142e-05	0.0217037	2.99647
DKK3	0.643871	0.643871	5.34127	1.79625e-05	0.0245206	2.75685
ACVR1	0.435777	0.435777	5.2728	2.13277e-05	0.027728	2.61193
GPX8	0.665652	0.665652	5.21124	2.48936e-05	0.0292698	2.48127
CALD1	0.648912	0.648912	5.1981	2.57298e-05	0.0292698	2.45332
FBN1	0.478699	0.478699	5.01845	4.04589e-05	0.042485	2.06969
MLLT11	0.446634	0.446634	4.91864	5.20602e-05	0.0493105	1.85541
CSRP2	0.480203	0.480203	4.91624	5.23773e-05	0.0493105	1.85025
TUSC3	0.611301	0.611301	4.85738	6.07847e-05	0.0553181	1.72353
GREM1	0.704656	0.704656	4.79208	7.17115e-05	0.0616046	1.58266
SPARC	0.957899	0.957899	4.78285	7.34067e-05	0.0616046	1.56274
ASPN	1.00639	1.00639	4.77722	7.44616e-05	0.0616046	1.55058
AEBP1	0.711282	0.711282	4.73534	8.27938e-05	0.0664834	1.46009
MYL9	0.690542	0.690542	4.71317	8.75775e-05	0.0679703	1.41215
ANGPTL2	0.585324	0.585324	4.70405	8.96246e-05	0.0679703	1.39242
SLC12A8	0.506256	0.506256	4.68995	9.28865e-05	0.0685402	1.36189
RUNX1	0.626332	0.626332	4.66971	9.77762e-05	0.0702496	1.31808
BHLHE41	0.651543	0.651543	4.60513	0.000115168	0.0806232	1.17817
FAM174B	0.464003	0.464003	4.56597	0.000127191	0.0868145	1.09323
ACTA2	0.74885	0.74885	4.53893	0.000136218	0.0872918	1.03457
ARHGEF17	0.333671	0.333671	4.53529	0.000137482	0.0872918	1.02666
PRRX1	0.624398	0.624398	4.51493	0.000144765	0.0879155	0.982479
RBMS2	0.366398	0.366398	4.51455	0.000144905	0.0879155	0.981653
TIMP3	0.505509	0.505509	4.47737	0.00015923	0.089985	0.900933
LUM	0.922684	0.922684	4.47131	0.000161697	0.089985	0.887765
ARHGAP1	0.405915	0.405915	4.4705	0.000162028	0.089985	0.886015
SFRP4	1.17468	1.17468	4.4695	0.000162439	0.089985	0.883841
PXDC1	0.416401	0.416401	4.45992	0.000166433	0.089985	0.863035
AGR2	0.991053	0.991053	4.45601	0.000168091	0.089985	0.854542
CTHRC1	0.73094	0.73094	4.43544	0.000177091	0.0929797	0.809855
TIMP1	0.643425	0.643425	4.39041	0.000198506	0.0995708	0.712016
COL6A3	0.784334	0.784334	4.3863	0.000200586	0.0995708	0.70308
THBS2	0.792101	0.792101	4.37243	0.000207764	0.0999324	0.672934
ADARB1	0.385914	0.385914	4.36793	0.000210148	0.0999324	0.66315
STOML1	0.256924	0.256924	4.36392	0.000212295	0.0999324	0.654434
INHBA	0.74903	0.74903	4.34214	0.000224338	0.101459	0.607112
RGS4	0.494541	0.494541	4.33331	0.000229418	0.101459	0.587907
TCF4	0.425681	0.425681	4.33271	0.000229765	0.101459	0.586609
COL1A2	0.672695	0.672695	4.31897	0.000237903	0.101713	0.556751
FGFR1	0.522195	0.522195	4.31387	0.000241	0.101713	0.545656
SPP1	1.44861	1.44861	4.31198	0.000242156	0.101713	0.541548
ZNF70	0.324813	0.324813	4.28199	0.000261263	0.107424	0.476382
MFAP2	0.6592	0.6592	4.27844	0.000263623	0.107424	0.468666
SPATA18	0.383317	0.383317	4.25837	0.000277366	0.11055	0.42505
TFF1	1.23201	1.23201	4.24981	0.000283442	0.11055	0.406448
SGCB	0.418957	0.418957	4.2387	0.000291526	0.111281	0.382306
NEXN	0.571009	0.571009	4.15731	0.000358173	0.131852	0.205499
BASP1	0.424224	0.424224	4.15289	0.000362205	0.131852	0.195884
HSPG2	0.367058	0.367058	4.14219	0.00037213	0.133683	0.17266
GSDMC	0.354531	0.354531	4.11534	0.000398256	0.1394	0.114367
RAB23	0.388757	0.388757	4.09878	0.000415264	0.141719	0.0784335
COL11A1	0.769203	0.769203	4.08812	0.000426596	0.142517	0.0552968
SNORD114-14	0.778653	0.778653	4.08678	0.000428041	0.142517	0.0523919
MRAS	0.461328	0.461328	4.06485	0.000452403	0.143813	0.00482082
NPTN	0.323549	0.323549	4.05037	0.000469233	0.147253	-0.0265714
BLID	0.360517	0.360517	4.04062	0.000480914	0.148527	-0.0477065
CTSB	0.597516	0.597516	4.01435	0.000513836	0.154162	-0.104623
PRRC2B	0.326942	0.326942	4.00147	0.000530792	0.157518	-0.132532
LBH	0.334206	0.334206	3.9824	0.000556915	0.163494	-0.173833
FUT8	0.291382	0.291382	3.96135	0.000587216	0.167479	-0.219382
GLT8D2	0.656674	0.656674	3.94846	0.000606578	0.167479	-0.247272
ZEB1	0.46204	0.46204	3.93464	0.000628042	0.167479	-0.27717
CACNA1C-IT3	0.378421	0.378421	3.93195	0.000632306	0.167479	-0.282987
LYZ	0.700717	0.700717	3.93078	0.000634167	0.167479	-0.285514
COL10A1	0.754602	0.754602	3.93013	0.000635198	0.167479	-0.286912
PBX3	0.353199	0.353199	3.92102	0.000649917	0.167479	-0.306607
REG4	1.24061	1.24061	3.91849	0.00065406	0.167479	-0.31207
ADAM19	0.275053	0.275053	3.90741	0.00067253	0.167479	-0.336014
PDLIM5	0.322855	0.322855	3.90643	0.000674195	0.167479	-0.338141
CD53	0.551909	0.551909	3.90499	0.000676632	0.167479	-0.341244
CNN1	0.547313	0.547313	3.90089	0.000683648	0.167479	-0.350113
CD55	0.739283	0.739283	3.89833	0.000688053	0.167479	-0.355635
SNX24	0.438294	0.438294	3.89724	0.000689937	0.167479	-0.357987
COPZ2	0.567768	0.567768	3.89362	0.000696244	0.167479	-0.365811
COL3A1	0.746989	0.746989	3.89187	0.00069931	0.167479	-0.369589
THY1	0.529467	0.529467	3.87874	0.000722745	0.169047	-0.397932
ANAPC13	0.299975	0.299975	3.86609	0.000746054	0.169388	-0.425225
P3H1	0.272829	0.272829	3.85544	0.000766256	0.169388	-0.448199
NR2F2	0.441831	0.441831	3.85271	0.000771526	0.169388	-0.454092
FSTL1	0.250041	0.250041	3.85066	0.000775511	0.169388	-0.458522
BLVRA	0.248058	0.248058	3.85065	0.000775528	0.169388	-0.458541
BICC1	0.461987	0.461987	3.83999	0.000796537	0.17259	-0.481524
COL6A1	0.540702	0.540702	3.83374	0.000809118	0.17259	-0.494999
PRDM6	0.338319	0.338319	3.83372	0.000809154	0.17259	-0.495037
TREM2	0.322393	0.322393	3.8262	0.000824554	0.17415	-0.511248
KANSL1L	0.411489	0.411489	3.81578	0.000846354	0.17415	-0.533686
HSCB	0.379074	0.379074	3.81477	0.000848496	0.17415	-0.535859
PTGIS	0.280282	0.280282	3.8132	0.000851845	0.17415	-0.539247
IL3RA	0.335678	0.335678	3.81185	0.00085474	0.17415	-0.542164
PSD3	0.480417	0.480417	3.79032	0.000902067	0.179768	-0.588501
RBPMS	0.477347	0.477347	3.77435	0.000938843	0.18489	-0.622858
SNORD114-25	0.624509	0.624509	3.77262	0.000942897	0.18489	-0.626563
CTSK	0.582869	0.582869	3.77043	0.000948085	0.18489	-0.631281
CEP295NL	0.587513	0.587513	3.76669	0.000956986	0.185302	-0.639315
HYAL1	0.306517	0.306517	3.76368	0.000964227	0.18539	-0.645795
MXRA5	0.589046	0.589046	3.72937	0.0010505	0.200564	-0.719466
DAP	0.330353	0.330353	3.71947	0.00107679	0.203444	-0.740718
DSEL	0.376456	0.376456	3.7154	0.00108778	0.203444	-0.749452
MMP2	0.558025	0.558025	3.71307	0.00109411	0.203444	-0.75444
AP1G2	0.226704	0.226704	3.70989	0.00110283	0.203444	-0.761265
DCN	0.675882	0.675882	3.70877	0.00110592	0.203444	-0.763669
CHI3L1	0.413203	0.413203	3.70592	0.0011138	0.203444	-0.769767
MAP7D3	0.393269	0.393269	3.7045	0.00111774	0.203444	-0.772808
R3HCC1	0.255249	0.255249	3.6961	0.00114142	0.203923	-0.790824
MEDAG	0.707218	0.707218	3.69327	0.00114949	0.203923	-0.796884
FAP	0.943451	0.943451	3.69195	0.00115328	0.203923	-0.799713
LST1	0.410008	0.410008	3.69024	0.00115821	0.203923	-0.80338
DYRK4	0.286285	0.286285	3.68296	0.00117939	0.205094	-0.818957
CD99	0.300939	0.300939	3.66933	0.00122011	0.209506	-0.848133
FOXP1	0.414071	0.414071	3.64845	0.0012852	0.216596	-0.892801
ZBTB8A	0.268651	0.268651	3.6442	0.00129887	0.217425	-0.901889
FGF7	0.522997	0.522997	3.64198	0.00130605	0.217425	-0.906627
HDLBP	0.326423	0.326423	3.63505	0.00132874	0.219484	-0.921431
SNORD114-21	0.336623	0.336623	3.63251	0.00133716	0.219484	-0.926856
AKAP12	0.518168	0.518168	3.63007	0.00134529	0.219484	-0.932069
NREP	0.397755	0.397755	3.62347	0.00136754	0.219484	-0.946165
VKORC1	0.377935	0.377935	3.61943	0.00138132	0.219484	-0.95478
PLXDC2	0.639231	0.639231	3.61754	0.00138781	0.219484	-0.958805
COL8A1	0.262483	0.262483	3.61548	0.00139494	0.219484	-0.963208
CD109	0.361301	0.361301	3.61342	0.00140207	0.219484	-0.967591
WDR47	0.298915	0.298915	3.61182	0.00140766	0.219484	-0.971011
ITGA5	0.642764	0.642764	3.60891	0.00141788	0.219484	-0.977225
ANOS1	0.584465	0.584465	3.60835	0.00141985	0.219484	-0.97842
DACT1	0.441146	0.441146	3.59869	0.00145429	0.219892	-0.999007
CLIC4	0.333316	0.333316	3.59772	0.00145778	0.219892	-1.00107
KCNK7	0.209859	0.209859	3.58288	0.00151244	0.226833	-1.03269
WDR19	0.327627	0.327627	3.58012	0.00152285	0.226833	-1.03858
UBE2F	0.296467	0.296467	3.57637	0.00153704	0.226833	-1.04655
STK38L	0.281339	0.281339	3.57317	0.00154927	0.227409	-1.05336
WWC2	0.279623	0.279623	3.56395	0.00158507	0.231073	-1.07298
MAN2B2	0.266235	0.266235	3.5624	0.00159115	0.231073	-1.07627
SRGAP2	0.429666	0.429666	3.55778	0.00160948	0.231774	-1.08611
POSTN	0.810625	0.810625	3.55543	0.00161884	0.231774	-1.09109
PECAM1	0.31518	0.31518	3.55479	0.00162145	0.231774	-1.09247
LOX	0.595103	0.595103	3.51005	0.00181106	0.252753	-1.18744
COL27A1	0.401418	0.401418	3.50672	0.00182599	0.252753	-1.19449
HTRA1	0.363679	0.363679	3.50646	0.00182716	0.252753	-1.19504
MYLK	0.495217	0.495217	3.49829	0.00186441	0.252753	-1.21237
CNTLN	0.252873	0.252873	3.4966	0.00187217	0.252753	-1.21593
CNDP1	0.264156	0.264156	3.49067	0.00189978	0.252753	-1.2285
COL4A1	0.351137	0.351137	3.49047	0.00190071	0.252753	-1.22892
SERPINE1	0.622268	0.622268	3.49015	0.00190218	0.252753	-1.22958
IL4R	0.313103	0.313103	3.4894	0.00190574	0.252753	-1.23119
RAB31	0.7606	0.7606	3.48903	0.00190749	0.252753	-1.23198
ST3GAL3	0.290331	0.290331	3.48664	0.00191873	0.252753	-1.23702
RAB5B	0.240118	0.240118	3.48325	0.00193485	0.252753	-1.2442
ASIC3	0.280241	0.280241	3.47145	0.00199195	0.258725	-1.26916
NID2	0.445408	0.445408	3.4699	0.00199952	0.258725	-1.27242
PXK	0.283286	0.283286	3.46703	0.0020137	0.259331	-1.27849
GNAI2P1	0.391101	0.391101	3.45953	0.00205125	0.262926	-1.29434
FZD7	0.384497	0.384497	3.45035	0.00209815	0.26768	-1.31374
SFTA3	0.219988	0.219988	3.44264	0.00213827	0.269294	-1.32999
ITPRIP	0.20915	0.20915	3.44096	0.00214713	0.269294	-1.33354
PARD6G	0.224079	0.224079	3.4358	0.00217457	0.27092	-1.34443
GLI3	0.486507	0.486507	3.43107	0.00219997	0.2711	-1.3544
NRP2	0.664502	0.664502	3.43025	0.00220439	0.2711	-1.35612
TPM1	0.401506	0.401506	3.42137	0.00225303	0.271969	-1.37484
SGIP1	0.584684	0.584684	3.41988	0.00226126	0.271969	-1.37797
SNX11	0.182306	0.182306	3.41354	0.00229676	0.275027	-1.39133
OSMR	0.323786	0.323786	3.40318	0.00235585	0.280871	-1.41311
ALCAM	0.390109	0.390109	3.38509	0.00246268	0.290906	-1.45114
VIM	0.425018	0.425018	3.37473	0.00252598	0.294719	-1.4729
PKD2	0.3145	0.3145	3.36583	0.0025816	0.296459	-1.49157
CAMK2D	0.314229	0.314229	3.36386	0.00259406	0.296459	-1.4957
NAV1	0.376987	0.376987	3.36197	0.00260606	0.296459	-1.49965
UBE2Q2P8	0.41259	0.41259	3.35964	0.00262094	0.296459	-1.50453
GLI2	0.508196	0.508196	3.35879	0.00262642	0.296459	-1.50632
KLK12	0.226486	0.226486	3.35755	0.00263436	0.296459	-1.50891
EDNRA	0.537077	0.537077	3.35521	0.00264947	0.296459	-1.51381
PMP22	0.491743	0.491743	3.35314	0.0026629	0.296745	-1.51814
SSPN	0.444603	0.444603	3.34874	0.00269175	0.29704	-1.52738
TAGLN	0.465089	0.465089	3.34776	0.00269819	0.29704	-1.52943
MDFIC	0.411978	0.411978	3.34217	0.00273524	0.29871	-1.54111
CD44	0.356377	0.356377	3.32202	0.00287315	0.311281	-1.58326
VEGFC	0.40379	0.40379	3.31524	0.002921	0.313231	-1.5974
CHST11	0.386739	0.386739	3.30754	0.00297633	0.317273	-1.61348
SLC7A4	0.211869	0.211869	3.30202	0.00301661	0.319223	-1.62499
SLAMF8	0.262166	0.262166	3.28987	0.0031072	0.32628	-1.65032
PDLIM7	0.22928	0.22928	3.27784	0.0031994	0.332129	-1.67536
FAM133CP	0.568976	0.568976	3.25417	0.00338872	0.342599	-1.72456
ADAMTS6	0.568499	0.568499	3.25063	0.00341794	0.342599	-1.73191
NFATC4	0.261306	0.261306	3.25055	0.00341858	0.342599	-1.73207
RNF152	0.263026	0.263026	3.2493	0.00342902	0.342599	-1.73468
FAM149A	0.241166	0.241166	3.24818	0.00343829	0.342599	-1.73699
DYSF	0.296011	0.296011	3.24664	0.00345116	0.342631	-1.74018
MAN2B1	0.232306	0.232306	3.24185	0.00349151	0.345381	-1.75013
SDHA	0.181627	0.181627	3.24032	0.00350448	0.345413	-1.7533
DEFB134	0.215008	0.215008	3.23437	0.00355532	0.34603	-1.76562
STAB1	0.285469	0.285469	3.23366	0.00356144	0.34603	-1.76709
TMEM109	0.213722	0.213722	3.21376	0.00373721	0.359973	-1.80829
BACE2-IT1	0.50371	0.50371	3.21129	0.00375956	0.359973	-1.81339
SLC2A3	0.604806	0.604806	3.21106	0.00376171	0.359973	-1.81388
PAM	0.369411	0.369411	3.20526	0.0038148	0.362898	-1.82586
C1orf198	0.254338	0.254338	3.19861	0.00387659	0.36591	-1.83959
CCDC80	0.469702	0.469702	3.19753	0.00388667	0.36591	-1.84181
ECE2	0.201004	0.201004	3.18365	0.00401908	0.369538	-1.87044
B3GALNT1	0.413436	0.413436	3.18335	0.00402199	0.369538	-1.87106
OSGEPL1	0.229276	0.229276	3.18217	0.00403349	0.369538	-1.8735
SERPINH1P1	0.293051	0.293051	3.17768	0.00407741	0.372313	-1.88276
CD93	0.389272	0.389272	3.16774	0.00417627	0.378805	-1.90322
SNORD113-4	0.38247	0.38247	3.16332	0.00422095	0.381591	-1.91231
TMEM184B	0.264184	0.264184	3.15726	0.00428297	0.385078	-1.92477
OR10G7	0.286487	0.286487	3.1568	0.00428773	0.385078	-1.92572
CRMP1	0.318133	0.318133	3.14514	0.00440971	0.392732	-1.94968
TNFAIP6	0.61072	0.61072	3.14318	0.0044305	0.392732	-1.95369
LTBP2	0.208224	0.208224	3.14073	0.00445667	0.393773	-1.95872
ITPKA	0.183207	0.183207	3.13128	0.00455905	0.39728	-1.97811
ADAM12	0.62514	0.62514	3.13018	0.00457106	0.39728	-1.98035
COL5A1	0.561877	0.561877	3.1268	0.00460833	0.39728	-1.98728
SPEG	0.211213	0.211213	3.12509	0.00462732	0.39728	-1.9908
HABP4	0.267629	0.267629	3.12367	0.00464307	0.397383	-1.9937
SH3BGRL3	0.27615	0.27615	3.11955	0.0046892	0.397898	-2.00213
CACNG3	0.204251	0.204251	3.11824	0.00470399	0.397898	-2.00482
RUNX1-IT1	0.461694	0.461694	3.11221	0.00477239	0.399345	-2.01714
LAYN	0.275372	0.275372	3.11217	0.00477286	0.399345	-2.01722
ITGB1P1	0.358265	0.358265	3.10785	0.00482254	0.401417	-2.02606
SNORD114-22	0.320031	0.320031	3.10483	0.0048576	0.402497	-2.03224
IRAK3	0.372815	0.372815	3.0999	0.00491524	0.402497	-2.0423
FCGR1A	0.529678	0.529678	3.09625	0.0049584	0.402497	-2.04976
EFEMP2	0.268507	0.268507	3.09609	0.00496029	0.402497	-2.05008
GJA1	0.324108	0.324108	3.09557	0.00496649	0.402497	-2.05115
TGFBR1	0.331913	0.331913	3.09475	0.00497622	0.402497	-2.05281
PARVA	0.334656	0.334656	3.09277	0.0049999	0.402497	-2.05686
CCDC88A	0.333111	0.333111	3.09165	0.00501328	0.402497	-2.05914
NCF2	0.322907	0.322907	3.08861	0.00504988	0.402497	-2.06534
ANAPC10	0.309586	0.309586	3.08861	0.00504989	0.402497	-2.06535
CHST1	0.198803	0.198803	3.08806	0.0050566	0.402497	-2.06648
ABCA1	0.323463	0.323463	3.08799	0.00505745	0.402497	-2.06662
LEF1	0.324901	0.324901	3.08657	0.00507458	0.402497	-2.06951
ADAMTS16	0.806249	0.806249	3.08449	0.00509995	0.402497	-2.07376
SNORA70	0.184904	0.184904	3.08336	0.00511365	0.402497	-2.07605
BACE2	0.372343	0.372343	3.0832	0.00511562	0.402497	-2.07637
ABCC9	0.614906	0.614906	3.08176	0.00513324	0.402723	-2.07931
MUC5B	0.619559	0.619559	3.07643	0.00519905	0.403921	-2.09017
TPM4	0.317688	0.317688	3.07627	0.00520105	0.403921	-2.09049
LAMA1	0.23713	0.23713	3.07599	0.00520452	0.403921	-2.09106
TECRP2	0.203544	0.203544	3.07385	0.00523123	0.403921	-2.09543
PCDH7	0.493109	0.493109	3.06822	0.00530209	0.407219	-2.10689
FMNL3	0.369277	0.369277	3.0676	0.00530987	0.407219	-2.10814
GNAI2	0.450427	0.450427	3.06098	0.00539446	0.412548	-2.12161
SNORD113-6	0.304003	0.304003	3.05608	0.00545788	0.416232	-2.13157
COX6CP14	0.19304	0.19304	3.05025	0.00553427	0.420147	-2.14341
PIAS3	0.375399	0.375399	3.04951	0.00554407	0.420147	-2.14492
UBTD2	0.201351	0.201351	3.04772	0.00556765	0.420147	-2.14854
PPP2R2B	0.201172	0.201172	3.04584	0.0055927	0.420639	-2.15236
HLA-DRB9	0.351958	0.351958	3.04243	0.00563828	0.422321	-2.15928
DPYD	0.466167	0.466167	3.04097	0.00565791	0.422321	-2.16224
KLK14	0.181087	0.181087	3.04071	0.00566147	0.422321	-2.16277
PCDH17	0.264301	0.264301	3.03413	0.00575078	0.42636	-2.1761
TGFB3	0.549145	0.549145	3.03245	0.00577377	0.42636	-2.1795
AOC2	0.221221	0.221221	3.02521	0.00587404	0.43111	-2.19416
TCN1	1.05419	1.05419	3.02159	0.00592489	0.431621	-2.2015
ACP5	0.191657	0.191657	3.02154	0.00592553	0.431621	-2.20159
KDSR	0.210397	0.210397	3.02134	0.00592843	0.431621	-2.202
KLF11	0.178929	0.178929	3.01553	0.0060108	0.434145	-2.21375
IFT80	0.251643	0.251643	3.00659	0.00613973	0.434192	-2.23181
CRYZP2	0.250673	0.250673	3.00418	0.00617484	0.434192	-2.23666
LY6G5C	0.225912	0.225912	3.00414	0.00617553	0.434192	-2.23676
KRTAP12-2	0.234871	0.234871	3.00266	0.00619717	0.434192	-2.23974
C1orf162	0.440408	0.440408	3.00185	0.00620911	0.434192	-2.24137
PLXND1	0.382415	0.382415	3.00119	0.00621879	0.434192	-2.2427
NUAK1	0.341984	0.341984	3.00114	0.00621963	0.434192	-2.24281
MEIS2	0.392229	0.392229	3.00048	0.0062294	0.434192	-2.24415
SLC18A1	0.394365	0.394365	2.99742	0.00627463	0.435903	-2.2503
ATN1	0.228981	0.228981	2.9948	0.00631381	0.436978	-2.2556
TRIM43CP	0.210282	0.210282	2.99305	0.00634009	0.436978	-2.25913
GABBR1	0.289896	0.289896	2.99174	0.00635974	0.436978	-2.26176
SERPINF1	0.587838	0.587838	2.99126	0.00636692	0.436978	-2.26272
TMEM91	0.189156	0.189156	2.99105	0.00637012	0.436978	-2.26315
ADAP2	0.276255	0.276255	2.98859	0.00640743	0.438142	-2.26812
SNX19	0.190078	0.190078	2.98755	0.0064231	0.438142	-2.2702
CCNI	0.222584	0.222584	2.98602	0.0064465	0.438142	-2.27329
ATG14	0.221449	0.221449	2.9835	0.00648498	0.439337	-2.27835
DCHS1	0.345592	0.345592	2.9804	0.00653281	0.440392	-2.2846
DMTN	0.23041	0.23041	2.97625	0.0065973	0.441717	-2.29295
SNORD113-3	0.298622	0.298622	2.97507	0.00661566	0.441717	-2.29531
NR2F1-AS1	0.300096	0.300096	2.97394	0.00663345	0.441717	-2.2976
PRR30	0.25846	0.25846	2.97003	0.00669495	0.441717	-2.30544
CLMP	0.27174	0.27174	2.96946	0.00670409	0.441717	-2.3066
HSPA4L	0.742271	0.742271	2.96926	0.00670726	0.441717	-2.307
VSIG10L	0.20362	0.20362	2.96858	0.00671793	0.441717	-2.30835
STEAP4	0.427224	0.427224	2.9616	0.00682977	0.443499	-2.32239
PDE4D	0.55099	0.55099	2.96104	0.00683875	0.443499	-2.3235
COX6CP11	0.204016	0.204016	2.95997	0.00685598	0.443499	-2.32564
SCG5	0.540483	0.540483	2.95868	0.00687693	0.443499	-2.32824
ULK4P3	0.317267	0.317267	2.95115	0.00700018	0.443499	-2.34333
TTBK2	0.280286	0.280286	2.94935	0.00702999	0.443499	-2.34694
MLPH	0.336731	0.336731	2.94815	0.00704999	0.443499	-2.34935
EIF3K	0.1981	0.1981	2.94812	0.00705046	0.443499	-2.34941
SRGAP2C	0.394827	0.394827	2.94786	0.00705471	0.443499	-2.34992
FABP7	0.216388	0.216388	2.94623	0.00708193	0.443499	-2.35319
CRIP1	0.399484	0.399484	2.94514	0.00710015	0.443499	-2.35537
GLIS3	0.452566	0.452566	2.94497	0.00710298	0.443499	-2.35571
PPP1R18	0.333423	0.333423	2.94483	0.00710541	0.443499	-2.356
HECW1-IT1	0.263831	0.263831	2.94436	0.0071133	0.443499	-2.35695
IGFBP3	0.42977	0.42977	2.94096	0.0071704	0.444923	-2.36374
SNORD114-2	0.182948	0.182948	2.9336	0.00729592	0.449547	-2.37847
CLN8	0.276886	0.276886	2.93273	0.00731078	0.449547	-2.3802
DCLK2	0.400261	0.400261	2.92803	0.00739219	0.450054	-2.3896
LRRC15	0.336029	0.336029	2.92694	0.0074112	0.450054	-2.39178
GYPC	0.240467	0.240467	2.92565	0.00743375	0.450054	-2.39436
BIN3	0.245712	0.245712	2.92294	0.00748124	0.450861	-2.39977
KCNG2	0.201517	0.201517	2.91879	0.0075546	0.450861	-2.40805
CCL4L2	0.4078	0.4078	2.9183	0.00756334	0.450861	-2.40903
GJB2	0.497566	0.497566	2.91247	0.00766759	0.455088	-2.42065
SERPINA1	0.546077	0.546077	2.90338	0.00783297	0.460816	-2.43875
PCBP4	0.163009	0.163009	2.90284	0.00784301	0.460816	-2.43984
RPL7AP66	0.204583	0.204583	2.90192	0.00785988	0.460816	-2.44166
HDAC5	0.224662	0.224662	2.90169	0.00786417	0.460816	-2.44213
CALU	0.257526	0.257526	2.90045	0.00788712	0.460816	-2.4446
ITGBL1	0.376445	0.376445	2.90001	0.0078952	0.460816	-2.44547
PODXL	0.232602	0.232602	2.89806	0.00793143	0.460816	-2.44935
SH3PXD2B	0.214162	0.214162	2.89725	0.00794656	0.460816	-2.45097
WSB2	0.228296	0.228296	2.89614	0.00796726	0.460852	-2.45317
RTP5	0.16037	0.16037	2.89427	0.00800214	0.461097	-2.45688
CDH11	0.279987	0.279987	2.89234	0.0080385	0.462036	-2.46072
PLPP4	0.495453	0.495453	2.89141	0.00805604	0.462072	-2.46257
CSGALNACT1	0.278074	0.278074	2.8801	0.00827221	0.471498	-2.48502
VTRNA1-1	0.244684	0.244684	2.87143	0.00844173	0.478166	-2.50221
ADGRA2	0.290496	0.290496	2.86808	0.00850822	0.480935	-2.50886
CDC42SE1	0.248013	0.248013	2.86683	0.00853309	0.481344	-2.51133
ACSL1	0.241609	0.241609	2.86031	0.00866394	0.484653	-2.52422
THSD7A	0.249005	0.249005	2.85949	0.00868052	0.484653	-2.52584
SLC39A11	0.208634	0.208634	2.85632	0.00874502	0.485488	-2.53211
KRTAP10-11	0.180289	0.180289	2.85381	0.00879636	0.485488	-2.53707
MTFR1L	0.216096	0.216096	2.85274	0.00881852	0.485488	-2.5392
ANO8	0.234966	0.234966	2.85267	0.00881994	0.485488	-2.53934
ULBP2	0.26464	0.26464	2.84544	0.00896983	0.49128	-2.55361
OGFRL1	0.452402	0.452402	2.84417	0.00899642	0.49128	-2.55611
ZBTB8OS	0.231695	0.231695	2.84414	0.00899715	0.49128	-2.55618
VCAN	0.530108	0.530108	2.83331	0.00922693	0.498653	-2.57753
PEAK1	0.319893	0.319893	2.83321	0.00922919	0.498653	-2.57773
BCAT1	0.336135	0.336135	2.83317	0.00922992	0.498653	-2.5778
ABCA2	0.243056	0.243056	2.833	0.00923357	0.498653	-2.57813
NNMT	0.295271	0.295271	2.83151	0.00926576	0.498689	-2.58108
STRADA	0.236491	0.236491	2.83018	0.00929431	0.498689	-2.58368
PLS3	0.369925	0.369925	2.8247	0.00941365	0.498856	-2.59448
TMEM185A	0.211185	0.211185	2.82423	0.009424	0.498856	-2.59541
FUT4	0.214086	0.214086	2.82276	0.00945621	0.498856	-2.59829
CD37	0.240628	0.240628	2.82203	0.00947219	0.498856	-2.59972
GPR137B	0.351546	0.351546	2.82053	0.00950532	0.498856	-2.60267
EEF2	0.214439	0.214439	2.8191	0.00953702	0.498856	-2.60549
DSE	0.330961	0.330961	2.81906	0.00953786	0.498856	-2.60557
KLRD1	0.250824	0.250824	2.81217	0.00969179	0.500939	-2.6191
NPS	0.188241	0.188241	2.80922	0.00975822	0.500939	-2.62488
SHC1	0.254446	0.254446	2.80745	0.00979845	0.500939	-2.62836
FLNA	0.285338	0.285338	2.80731	0.00980177	0.500939	-2.62865
CSRP1	0.347259	0.347259	2.80552	0.00984244	0.500939	-2.63215
TTTY5	0.228302	0.228302	2.80284	0.00990375	0.500939	-2.6374
CFI	0.224926	0.224926	2.80062	0.0099549	0.500939	-2.64175
AMOTL1	0.257864	0.257864	2.7985	0.0100041	0.500939	-2.64591
QKI	0.340522	0.340522	2.79583	0.0100661	0.500939	-2.65114
COL8A2	0.176026	0.176026	2.79424	0.0101032	0.500939	-2.65425
PTPN14	0.301166	0.301166	2.79297	0.0101329	0.500939	-2.65673
PILRA	0.247958	0.247958	2.79273	0.0101387	0.500939	-2.65721
KCNA1	0.239904	0.239904	2.79173	0.0101621	0.500939	-2.65916
SBSPON	0.396017	0.396017	2.78658	0.0102842	0.503547	-2.66925
TMEM94	0.169087	0.169087	2.78438	0.0103367	0.503547	-2.67355
KIF9	0.32018	0.32018	2.78376	0.0103514	0.503547	-2.67475
TET2	0.210243	0.210243	2.78279	0.0103747	0.503547	-2.67665
RFX4	0.153018	0.153018	2.78232	0.0103859	0.503547	-2.67756
PALMD	0.291779	0.291779	2.78053	0.010429	0.503547	-2.68106
IQCJ	0.312078	0.312078	2.78041	0.010432	0.503547	-2.6813
CDH13	0.223072	0.223072	2.77974	0.0104482	0.503547	-2.68261
CTSE	0.524679	0.524679	2.77935	0.0104575	0.503547	-2.68336
FN1	0.661063	0.661063	2.77758	0.0105004	0.504721	-2.68682
MTND4P16	0.163867	0.163867	2.77287	0.0106154	0.507342	-2.69602
CDO1	0.152385	0.152385	2.76742	0.0107498	0.510421	-2.70664
MSR1	0.303076	0.303076	2.76637	0.0107758	0.510766	-2.70868
SERTAD4	0.195295	0.195295	2.76305	0.0108587	0.513803	-2.71515
MXRA8	0.429202	0.429202	2.76221	0.0108799	0.513917	-2.7168
ARHGAP31	0.444623	0.444623	2.75423	0.0110821	0.518977	-2.73233
FBLN5	0.320049	0.320049	2.75185	0.0111429	0.52093	-2.73695
SNAI2	0.515918	0.515918	2.75056	0.011176	0.521587	-2.73945
GFPT2	0.346924	0.346924	2.74956	0.0112019	0.521627	-2.74141
CD83	0.231998	0.231998	2.74905	0.0112151	0.521627	-2.7424
KCNQ2	0.175649	0.175649	2.74659	0.0112788	0.521932	-2.74717
TRDJ2	0.372787	0.372787	2.74602	0.0112935	0.521932	-2.74827
RPS6KC1	0.193155	0.193155	2.74585	0.0112981	0.521932	-2.74862
NRP1	0.439438	0.439438	2.74275	0.0113788	0.523179	-2.75462
GLDN	0.20511	0.20511	2.74261	0.0113826	0.523179	-2.7549
MVB12A	0.178063	0.178063	2.74005	0.0114499	0.525389	-2.75987
GAS1	0.199776	0.199776	2.73556	0.0115687	0.528888	-2.76857
SMARCB1	0.194727	0.194727	2.73497	0.0115843	0.528888	-2.76971
PER3	0.358436	0.358436	2.7334	0.0116263	0.529918	-2.77276
NEUROG1	0.207208	0.207208	2.72605	0.0118243	0.536257	-2.78699
SPOCK1	0.469932	0.469932	2.72468	0.0118617	0.536656	-2.78965
ADAM22	0.364019	0.364019	2.72377	0.0118864	0.536656	-2.79141
RAET1L	0.252537	0.252537	2.7204	0.0119786	0.53878	-2.79791
LAPTM5	0.370878	0.370878	2.71138	0.012229	0.546113	-2.81534
RPL23AP53	0.168578	0.168578	2.71093	0.0122416	0.546113	-2.81621
MT1P1	0.177486	0.177486	2.70868	0.0123051	0.546264	-2.82056
MED9	0.210012	0.210012	2.70693	0.0123543	0.546675	-2.82393
CERCAM	0.292939	0.292939	2.70378	0.012444	0.548567	-2.83002
COL15A1	0.240673	0.240673	2.70211	0.0124915	0.548567	-2.83322
CDR1	0.55299	0.55299	2.70111	0.0125202	0.548567	-2.83516
XBP1	0.21994	0.21994	2.70056	0.012536	0.548567	-2.83621
FPR1	0.435304	0.435304	2.69792	0.0126119	0.548567	-2.8413
GNB4	0.243352	0.243352	2.69666	0.0126483	0.548567	-2.84372
DIO2	0.202081	0.202081	2.69526	0.0126889	0.548567	-2.84642
SNORA11	0.22098	0.22098	2.69438	0.0127145	0.548567	-2.84811
USP32P1	0.293687	0.293687	2.6943	0.0127167	0.548567	-2.84826
FGF7P1	0.24473	0.24473	2.69382	0.0127307	0.548567	-2.84919
EID1	0.173953	0.173953	2.69246	0.0127704	0.548567	-2.85181
MCTP1	0.43197	0.43197	2.69222	0.0127773	0.548567	-2.85227
FILIP1L	0.426646	0.426646	2.69177	0.0127907	0.548567	-2.85315
ULK4P1	0.237029	0.237029	2.69154	0.0127973	0.548567	-2.85358
SLC43A1	0.213841	0.213841	2.6908	0.0128191	0.548567	-2.85501
PCDHB5	0.222898	0.222898	2.68907	0.0128699	0.54988	-2.85834
GOLGA8K	0.226846	0.226846	2.68642	0.0129479	0.551489	-2.86342
HIP1	0.210318	0.210318	2.6853	0.0129811	0.552041	-2.86558
YWHAH	0.30514	0.30514	2.68124	0.0131019	0.553728	-2.87337
PRCP	0.334326	0.334326	2.67962	0.0131505	0.554923	-2.87648
MAGED1	0.213833	0.213833	2.67726	0.0132215	0.556442	-2.88101
SAP30	0.201296	0.201296	2.67707	0.0132273	0.556442	-2.88138
MT1XP1	0.181132	0.181132	2.66854	0.0134872	0.558601	-2.89774
CXCL16	0.440335	0.440335	2.66848	0.0134888	0.558601	-2.89784
PXYLP1	0.22152	0.22152	2.66775	0.0135113	0.558601	-2.89924
ADAMTS5	0.247084	0.247084	2.66647	0.0135507	0.558601	-2.90169
CASC15	0.208882	0.208882	2.66389	0.0136307	0.558601	-2.90663
KIF26B	0.418	0.418	2.66364	0.0136387	0.558601	-2.90712
ZNF543	0.263383	0.263383	2.66338	0.0136465	0.558601	-2.90761
IL18BP	0.229904	0.229904	2.66337	0.0136469	0.558601	-2.90763
RBFA	0.186413	0.186413	2.66204	0.0136883	0.558685	-2.91018
CNOT2	0.260874	0.260874	2.66199	0.0136899	0.558685	-2.91027
WIPI1	0.242936	0.242936	2.66026	0.013744	0.559065	-2.91359
UFSP2	0.260165	0.260165	2.65994	0.013754	0.559065	-2.9142
ISCA1P1	0.179097	0.179097	2.65932	0.0137733	0.559065	-2.91538
C1S	0.429682	0.429682	2.65842	0.0138015	0.559065	-2.9171
UBE2Q2L	0.206094	0.206094	2.65602	0.0138772	0.560929	-2.92169
HLA-DPB1	0.29603	0.29603	2.65545	0.0138952	0.560929	-2.92278
ZNF319	0.181843	0.181843	2.65501	0.0139092	0.560929	-2.92362
FCGR2A	0.418334	0.418334	2.65336	0.0139613	0.562201	-2.92677
GLP1R	0.214465	0.214465	2.65191	0.0140075	0.5624	-2.92954
GPC6	0.185565	0.185565	2.65028	0.0140593	0.562826	-2.93264
FLJ42393	0.18698	0.18698	2.64914	0.0140958	0.563449	-2.93482
C3AR1	0.412245	0.412245	2.64546	0.0142144	0.564823	-2.94185
NOX4	0.360874	0.360874	2.64503	0.0142283	0.564823	-2.94267
PTPN21	0.200153	0.200153	2.64487	0.0142333	0.564823	-2.94297
ANKRD20A10P	0.170864	0.170864	2.63658	0.0145037	0.571542	-2.95877
KLHL2	0.281007	0.281007	2.63584	0.0145282	0.571542	-2.96019
COL1A1	0.377418	0.377418	2.63287	0.0146264	0.573612	-2.96584
CPQ	0.274658	0.274658	2.62928	0.0147459	0.573612	-2.97266
GIMAP2	0.293877	0.293877	2.62813	0.0147843	0.573612	-2.97485
SULF2	0.375021	0.375021	2.62719	0.0148157	0.573612	-2.97663
RASL10A	0.201512	0.201512	2.62682	0.0148283	0.573612	-2.97734
ZNF532	0.451108	0.451108	2.62553	0.0148718	0.573612	-2.9798
NDUFS8	0.19167	0.19167	2.62489	0.0148933	0.573612	-2.98101
SDC2	0.316059	0.316059	2.62481	0.014896	0.573612	-2.98116
VSIG4	0.431302	0.431302	2.62088	0.0150289	0.576507	-2.98861
PPP2R5B	0.172337	0.172337	2.62072	0.0150345	0.576507	-2.98893
ECM1	0.242373	0.242373	2.6188	0.0151	0.577397	-2.99257
RPL7L1P3	0.212994	0.212994	2.61503	0.0152294	0.579022	-2.99973
XAGE2	0.171172	0.171172	2.61409	0.0152617	0.579022	-3.0015
CNN3	0.393589	0.393589	2.6096	0.0154173	0.579022	-3.01
DTNA	0.265949	0.265949	2.60897	0.0154395	0.579022	-3.01121
ZBTB46	0.149374	0.149374	2.60666	0.0155204	0.581258	-3.01559
ENAH	0.219421	0.219421	2.60461	0.0155921	0.582348	-3.01945
MCAM	0.195502	0.195502	2.6037	0.0156242	0.582747	-3.02117
CRH	0.176268	0.176268	2.60239	0.0156707	0.58289	-3.02366
RNF144A	0.269866	0.269866	2.60085	0.0157251	0.583326	-3.02657
AKT3	0.29179	0.29179	2.59984	0.0157612	0.583869	-3.02849
PDGFRL	0.304564	0.304564	2.59526	0.0159249	0.587098	-3.03714
VGLL3	0.39617	0.39617	2.59499	0.0159343	0.587098	-3.03764
ACO1	0.201111	0.201111	2.59427	0.0159603	0.587263	-3.03901
GPR148	0.163706	0.163706	2.59329	0.0159956	0.587769	-3.04086
CXCL1	0.314947	0.314947	2.59231	0.0160311	0.588279	-3.04271
SCGB1B2P	0.153975	0.153975	2.5901	0.0161112	0.590427	-3.04689
ARRB2	0.250722	0.250722	2.58771	0.0161981	0.591285	-3.05139
SLC6A6	0.245998	0.245998	2.58605	0.0162588	0.591285	-3.05452
PTTG1IP	0.240063	0.240063	2.5856	0.0162752	0.591285	-3.05536
TTI2	0.20357	0.20357	2.5853	0.0162862	0.591285	-3.05593
FXR2	0.162863	0.162863	2.58444	0.0163177	0.59164	-3.05755
EGR2	0.192147	0.192147	2.58287	0.0163755	0.592619	-3.06051
CXCL12	0.308515	0.308515	2.57772	0.0165663	0.595716	-3.0702
CTSL	0.216277	0.216277	2.57365	0.0167189	0.596006	-3.07788
PRR16	0.393024	0.393024	2.57345	0.0167262	0.596006	-3.07824
LEF1-AS1	0.187255	0.187255	2.572	0.0167809	0.596006	-3.08097
IL16	0.204618	0.204618	2.5717	0.0167921	0.596006	-3.08153
ELP3	0.384325	0.384325	2.57137	0.0168045	0.596006	-3.08215
TBKBP1	0.172309	0.172309	2.57125	0.0168092	0.596006	-3.08238
KCNMB1	0.213658	0.213658	2.56834	0.0169195	0.597058	-3.08786
TGFBI	0.341883	0.341883	2.56393	0.017088	0.597058	-3.09614
ARIH2OS	0.219174	0.219174	2.56358	0.0171013	0.597058	-3.09679
CD163	0.503053	0.503053	2.56183	0.0171685	0.598638	-3.10007
RDX	0.359355	0.359355	2.56075	0.0172103	0.59933	-3.1021
ALOX5AP	0.377317	0.377317	2.55773	0.0173271	0.601813	-3.10776
RHOJ	0.371667	0.371667	2.55723	0.0173467	0.601813	-3.1087
SFRP2	0.701518	0.701518	2.55659	0.0173717	0.601882	-3.10991
TRAJ56	0.545229	0.545229	2.55539	0.0174184	0.602181	-3.11215
ENTPD1	0.209885	0.209885	2.55279	0.01752	0.603462	-3.11701
AHNAK2	0.413113	0.413113	2.55263	0.0175265	0.603462	-3.11732
ETV5	0.657812	0.657812	2.55194	0.0175537	0.603462	-3.11862
KRTAP9-7	0.187281	0.187281	2.55181	0.0175585	0.603462	-3.11885
SNORD113-1	0.44389	0.44389	2.54586	0.0177942	0.609558	-3.12999
KDELR3	0.352934	0.352934	2.54484	0.0178351	0.610192	-3.1319
SRGAP2B	0.309652	0.309652	2.5433	0.0178966	0.610264	-3.13478
DRAXIN	0.193693	0.193693	2.54311	0.0179042	0.610264	-3.13514
RSPO3	0.347185	0.347185	2.54124	0.0179792	0.612057	-3.13863
VTRNA1-3	0.218941	0.218941	2.53841	0.0180933	0.612505	-3.14391
IGKV3OR22-2	0.212125	0.212125	2.53692	0.0181536	0.612505	-3.14669
PIAS2	0.291356	0.291356	2.53441	0.018256	0.612505	-3.15138
MTNR1B	0.206508	0.206508	2.53334	0.0182995	0.612505	-3.15337
FKBP9P1	0.21542	0.21542	2.53074	0.0184061	0.612505	-3.15822
BNC2	0.460167	0.460167	2.52948	0.0184578	0.612505	-3.16056
ATP1A4	0.164821	0.164821	2.529	0.0184779	0.612505	-3.16147
EMX2OS	0.146588	0.146588	2.52795	0.0185211	0.612505	-3.16342
IGHV3-30-2	0.167855	0.167855	2.52609	0.018598	0.612505	-3.16688
CRTC3	0.252131	0.252131	2.52598	0.0186029	0.612505	-3.16709
IGFBP5	0.333178	0.333178	2.52596	0.0186037	0.612505	-3.16713
ULK4	0.140417	0.140417	2.5256	0.0186184	0.612505	-3.16779
CD1A	0.168287	0.168287	2.52446	0.0186659	0.612505	-3.16992
TEK	0.140035	0.140035	2.52358	0.0187027	0.612505	-3.17156
AQP3	0.310123	0.310123	2.52306	0.0187243	0.612505	-3.17253
USP35	0.152375	0.152375	2.5224	0.0187521	0.612505	-3.17376
SCGB1D2	0.157176	0.157176	2.52163	0.0187843	0.612505	-3.1752
RFTN2	0.391081	0.391081	2.52055	0.0188293	0.612505	-3.17719
RELL2	0.195659	0.195659	2.51782	0.0189446	0.612505	-3.18228
SNORD114-20	0.280866	0.280866	2.51771	0.0189491	0.612505	-3.18248
SORBS2	0.429676	0.429676	2.5176	0.0189536	0.612505	-3.18268
SPINK4	0.892875	0.892875	2.51533	0.0190499	0.612505	-3.18691
HAGLROS	0.160712	0.160712	2.51488	0.0190688	0.612505	-3.18773
FCGR1B	0.201897	0.201897	2.51474	0.0190751	0.612505	-3.18801
RBM23	0.171464	0.171464	2.51303	0.0191479	0.612505	-3.19118
NFIC	0.203123	0.203123	2.51296	0.0191508	0.612505	-3.19131
OTUD7B	0.255205	0.255205	2.5125	0.0191704	0.612505	-3.19216
RBFOX2	0.228533	0.228533	2.51239	0.019175	0.612505	-3.19236
GPR176	0.320945	0.320945	2.5119	0.0191958	0.612505	-3.19327
FAM20C	0.293443	0.293443	2.51167	0.0192056	0.612505	-3.1937
IQCA1	0.142497	0.142497	2.50994	0.0192797	0.612505	-3.1969
CLEC7A	0.420596	0.420596	2.50992	0.0192809	0.612505	-3.19696
IGFBP2	0.275869	0.275869	2.50962	0.0192936	0.612505	-3.19751
AHR	0.2646	0.2646	2.50851	0.0193412	0.612591	-3.19956
PDGFRA	0.349502	0.349502	2.50695	0.0194088	0.612784	-3.20247
FUT6	0.264967	0.264967	2.50587	0.0194555	0.612784	-3.20447
PAX9	0.161954	0.161954	2.50548	0.0194722	0.612784	-3.20519
CYTIP	0.306458	0.306458	2.50532	0.0194792	0.612784	-3.20548
ZNF654	0.153179	0.153179	2.50497	0.0194941	0.612784	-3.20613
COL24A1	0.358434	0.358434	2.5025	0.0196017	0.612784	-3.21071
COMT	0.154634	0.154634	2.50227	0.0196116	0.612784	-3.21113
C16orf71	0.191396	0.191396	2.49815	0.0197919	0.612784	-3.21876
DMWD	0.236237	0.236237	2.49798	0.0197995	0.612784	-3.21908
TSPYL4	0.195982	0.195982	2.49698	0.0198437	0.612784	-3.22093
CAV1	0.336179	0.336179	2.49663	0.0198588	0.612784	-3.22157
WBP1LP3	0.157342	0.157342	2.49653	0.0198633	0.612784	-3.22176
SPI1	0.278461	0.278461	2.49653	0.0198635	0.612784	-3.22177
CMTM3	0.286052	0.286052	2.49451	0.0199527	0.613904	-3.2255
RNF225	0.153098	0.153098	2.49418	0.0199673	0.613904	-3.22611
SLC28A3	0.255396	0.255396	2.49195	0.0200666	0.614408	-3.23024
PPFIBP1	0.244902	0.244902	2.49179	0.0200734	0.614408	-3.23052
MAP4K4	0.19586	0.19586	2.48899	0.0201987	0.614933	-3.23571
SSC5D	0.171791	0.171791	2.4866	0.0203063	0.615938	-3.24013
SRGN	0.405974	0.405974	2.48637	0.0203164	0.615938	-3.24054
MZF1-AS1	0.17452	0.17452	2.48592	0.0203368	0.615938	-3.24138
ARID1B	0.198871	0.198871	2.48564	0.0203493	0.615938	-3.24189
TMEM47	0.247414	0.247414	2.48479	0.0203876	0.616414	-3.24345
COX7A1	0.222828	0.222828	2.48381	0.0204321	0.616546	-3.24527
KLF9	0.203203	0.203203	2.48369	0.0204375	0.616546	-3.24549
KCTD9P6	0.154533	0.154533	2.4832	0.0204597	0.616546	-3.24639
ITGAM	0.296636	0.296636	2.48128	0.0205469	0.61849	-3.24993
SPARCL1	0.440145	0.440145	2.47525	0.0208231	0.623999	-3.26105
TMEM263	0.201984	0.201984	2.47493	0.0208381	0.623999	-3.26165
MYH10	0.142456	0.142456	2.47352	0.0209034	0.624404	-3.26425
SNORA63	0.356796	0.356796	2.46958	0.0210862	0.628294	-3.27149
AP1S2	0.232123	0.232123	2.46923	0.0211027	0.628294	-3.27214
CACNA1I	0.165571	0.165571	2.46158	0.0214623	0.633474	-3.28619
RPS6KL1	0.144374	0.144374	2.45727	0.0216677	0.636655	-3.29411
DNM1P28	0.154336	0.154336	2.45687	0.0216867	0.636655	-3.29484
RSU1P3	0.224927	0.224927	2.45535	0.0217597	0.637508	-3.29763
PLA2G2E	0.133648	0.133648	2.45529	0.0217624	0.637508	-3.29774
NUCB2	0.350868	0.350868	2.4542	0.0218147	0.637669	-3.29973
DOC2B	0.205098	0.205098	2.45328	0.0218592	0.637669	-3.30142
RGCC	0.401061	0.401061	2.45324	0.0218613	0.637669	-3.3015
DCST2	0.177028	0.177028	2.45092	0.0219734	0.639037	-3.30575
XPNPEP3	0.289178	0.289178	2.45054	0.0219918	0.639037	-3.30645
SPATA5	0.252112	0.252112	2.45042	0.0219976	0.639037	-3.30667
RPS27P18	0.18337	0.18337	2.45033	0.0220018	0.639037	-3.30683
PCAT19	0.133624	0.133624	2.44571	0.022227	0.643668	-3.31528
AK1	0.210482	0.210482	2.44429	0.0222965	0.643668	-3.31788
HGD	0.337455	0.337455	2.44377	0.0223223	0.643668	-3.31884
OR51E1	0.207553	0.207553	2.44091	0.0224634	0.643668	-3.32407
UBE2R2	0.219771	0.219771	2.44065	0.0224762	0.643668	-3.32454
PEG3	0.14902	0.14902	2.4403	0.0224936	0.643668	-3.32519
NBPF1	0.167655	0.167655	2.43975	0.0225206	0.643668	-3.32618
CHST15	0.233105	0.233105	2.43885	0.0225651	0.643668	-3.32782
HLA-DRA	0.3595	0.3595	2.43564	0.0227253	0.643668	-3.33369
CNTNAP4	0.185945	0.185945	2.43534	0.0227401	0.643668	-3.33423
ABHD2	0.291794	0.291794	2.43491	0.0227616	0.643668	-3.33502
SHISA2	0.203897	0.203897	2.43478	0.0227681	0.643668	-3.33526
HIF1A	0.462352	0.462352	2.43443	0.0227857	0.643668	-3.3359
ARL4C	0.317847	0.317847	2.43426	0.0227944	0.643668	-3.33622
FAM228B	0.20524	0.20524	2.43389	0.0228128	0.643668	-3.33688
MEX3B	0.215614	0.215614	2.43087	0.0229649	0.64505	-3.3424
GPR65	0.369804	0.369804	2.42971	0.0230233	0.645361	-3.34451
NAV3	0.21245	0.21245	2.42624	0.0231994	0.648376	-3.35083
ABLIM3	0.264188	0.264188	2.42535	0.0232449	0.648376	-3.35245
COL2A1	0.208055	0.208055	2.42511	0.0232574	0.648376	-3.3529
RIC8A	0.195596	0.195596	2.42507	0.0232595	0.648376	-3.35297
OSCAR	0.136695	0.136695	2.42454	0.0232862	0.648376	-3.35393
NOXO1	0.192566	0.192566	2.41811	0.0236173	0.651249	-3.36563
COX5AP2	0.188802	0.188802	2.41809	0.023618	0.651249	-3.36566
RAD23A	0.18186	0.18186	2.41749	0.0236493	0.651249	-3.36676
SLC39A6	0.262333	0.262333	2.41597	0.0237285	0.651812	-3.36953
PPP1R3C	0.176067	0.176067	2.4144	0.02381	0.651812	-3.37237
MDH2	0.297503	0.297503	2.41402	0.0238298	0.651812	-3.37306
ARHGAP29	0.314543	0.314543	2.41363	0.0238503	0.651812	-3.37377
BNIP3L	0.247866	0.247866	2.41137	0.0239688	0.653089	-3.37788
HOXD8	0.140069	0.140069	2.41039	0.0240201	0.653661	-3.37965
HLCS-IT1	0.179022	0.179022	2.40934	0.0240756	0.653661	-3.38157
SLC22A12	0.14688	0.14688	2.40919	0.0240833	0.653661	-3.38183
GAB3	0.266235	0.266235	2.40915	0.0240855	0.653661	-3.38191
EMCN	0.348266	0.348266	2.4082	0.0241356	0.654149	-3.38363
LY96	0.46503	0.46503	2.4079	0.0241514	0.654149	-3.38417
C4BPAP2	0.194537	0.194537	2.40664	0.024218	0.654813	-3.38645
POU2F2	0.231261	0.231261	2.40545	0.0242814	0.654813	-3.38862
IGHV1-14	0.189798	0.189798	2.40518	0.0242959	0.654813	-3.38911
PDGFB	0.166569	0.166569	2.40331	0.0243952	0.655413	-3.39249
CACNA2D1	0.192496	0.192496	2.40296	0.0244141	0.655413	-3.39313
RRAS	0.141188	0.141188	2.40249	0.0244389	0.655432	-3.39397
DBR1	0.215717	0.215717	2.40039	0.0245513	0.65601	-3.39777
DANCR	0.249098	0.249098	2.39985	0.0245805	0.65601	-3.39876
FGD6	0.252655	0.252655	2.39877	0.0246384	0.656402	-3.40071
CDY13P	0.14728	0.14728	2.39506	0.0248391	0.657767	-3.40742
CXCR4	0.341259	0.341259	2.39373	0.0249117	0.658848	-3.40984
BCL3	0.201196	0.201196	2.39275	0.0249646	0.658848	-3.41159
PRKD1	0.432627	0.432627	2.39209	0.0250006	0.658848	-3.41279
GNE	0.289685	0.289685	2.39024	0.0251019	0.659165	-3.41613
VPREB1	0.211763	0.211763	2.39011	0.0251092	0.659165	-3.41637
BAIAP3	0.176965	0.176965	2.38563	0.0253558	0.662968	-3.42446
GMEB1	0.160549	0.160549	2.38543	0.0253666	0.662968	-3.42482
PCDHB10	0.243601	0.243601	2.38485	0.0253989	0.662968	-3.42587
PLD6	0.174008	0.174008	2.38483	0.0253998	0.662968	-3.42589
CYBRD1	0.413701	0.413701	2.3838	0.0254568	0.663267	-3.42775
PTPRG	0.340633	0.340633	2.38255	0.0255265	0.663267	-3.43001
MEG3	0.263197	0.263197	2.38153	0.0255835	0.663267	-3.43186
COL6A2	0.273894	0.273894	2.38136	0.0255929	0.663267	-3.43216
GLULP3	0.302458	0.302458	2.38047	0.0256426	0.663267	-3.43377
KCNJ15	0.175189	0.175189	2.38007	0.0256647	0.663267	-3.43448
TNFRSF12A	0.156753	0.156753	2.37979	0.0256804	0.663267	-3.43498
NLGN3	0.216898	0.216898	2.37737	0.0258164	0.664637	-3.43935
SEC22C	0.156084	0.156084	2.37691	0.0258422	0.664637	-3.44018
ADCY4	0.267816	0.267816	2.37671	0.0258532	0.664637	-3.44053
CHMP5	0.21792	0.21792	2.37358	0.0260301	0.666049	-3.44617
RANBP20P	0.201798	0.201798	2.37258	0.0260866	0.666743	-3.44796
PLPPR2	0.208564	0.208564	2.37057	0.0262009	0.668538	-3.45157
WDR91	0.206355	0.206355	2.3686	0.0263137	0.669046	-3.45512
TRAF3IP2	0.211528	0.211528	2.36723	0.0263919	0.669657	-3.45757
YIPF5	0.194238	0.194238	2.36574	0.0264776	0.670586	-3.46026
C2CD2	0.218825	0.218825	2.36433	0.0265587	0.671213	-3.46278
C5AR1	0.462705	0.462705	2.36423	0.0265644	0.671213	-3.46296
MTAP	0.274902	0.274902	2.3638	0.0265892	0.671213	-3.46373
IQCH	0.214326	0.214326	2.36283	0.0266454	0.671213	-3.46547
RET	0.134139	0.134139	2.36078	0.0267648	0.671993	-3.46917
CD74	0.253416	0.253416	2.35826	0.0269112	0.672091	-3.47367
DUX4L47	0.169665	0.169665	2.35726	0.02697	0.672091	-3.47548
TNXB	0.1708	0.1708	2.35708	0.0269801	0.672091	-3.47578
ITGAX	0.173084	0.173084	2.35253	0.0272481	0.676744	-3.48395
DUSP10	0.37202	0.37202	2.35069	0.0273569	0.678381	-3.48723
RAP1GAP	0.452704	0.452704	2.34898	0.0274583	0.678808	-3.49029
NBEAP1	0.27954	0.27954	2.34836	0.0274951	0.678808	-3.49139
CARD9	0.145398	0.145398	2.34824	0.0275023	0.678808	-3.49161
RUBCN	0.179574	0.179574	2.3464	0.027612	0.678808	-3.49489
OR6C69P	0.180494	0.180494	2.34621	0.0276233	0.678808	-3.49523
GLUL	0.345469	0.345469	2.34414	0.0277479	0.678808	-3.49895
DKK2	0.302314	0.302314	2.3433	0.0277981	0.678808	-3.50043
BTBD16	0.182097	0.182097	2.34221	0.0278639	0.678808	-3.50239
CTDP1	0.179164	0.179164	2.34181	0.0278878	0.678808	-3.50309
AXL	0.191983	0.191983	2.34148	0.0279076	0.678808	-3.50368
ITGB7	0.199116	0.199116	2.34042	0.0279722	0.678808	-3.50558
PXDN	0.206885	0.206885	2.33939	0.0280345	0.678808	-3.50742
SIDT2	0.225677	0.225677	2.33921	0.0280451	0.678808	-3.50773
MDM2	0.239637	0.239637	2.33666	0.0282004	0.68013	-3.51228
ST6GALNAC6	0.146004	0.146004	2.33663	0.0282022	0.68013	-3.51234
RBMS1P1	0.240305	0.240305	2.33582	0.0282513	0.68013	-3.51377
TOX	0.344514	0.344514	2.33527	0.0282849	0.68013	-3.51475
DUSP3	0.210381	0.210381	2.33526	0.0282858	0.68013	-3.51478
ADGRL4	0.298891	0.298891	2.3352	0.0282897	0.68013	-3.51489
IFNE	0.413754	0.413754	2.33504	0.0282993	0.68013	-3.51517
KCNN1	0.167008	0.167008	2.33362	0.0283859	0.681013	-3.51769
TNFRSF11B	0.616724	0.616724	2.33187	0.0284935	0.682395	-3.52081
HLA-DQA2	0.225293	0.225293	2.33103	0.0285454	0.682847	-3.52231
METTL24	0.201671	0.201671	2.32915	0.0286618	0.682847	-3.52566
PGM2	0.152433	0.152433	2.32877	0.0286852	0.682847	-3.52634
RASSF5	0.190571	0.190571	2.32658	0.028821	0.684832	-3.53023
BMS1P16	0.190603	0.190603	2.3255	0.0288883	0.685833	-3.53215
C1QTNF3	0.262529	0.262529	2.32401	0.028981	0.686307	-3.53479
CDK2AP1	0.172752	0.172752	2.32401	0.0289812	0.686307	-3.5348
MBOAT2	0.35622	0.35622	2.32397	0.0289837	0.686307	-3.53486
NUDT15	0.146221	0.146221	2.32318	0.0290331	0.686883	-3.53627
RPL7AP14	0.180629	0.180629	2.3217	0.0291259	0.687328	-3.5389
MRC2	0.206848	0.206848	2.32127	0.0291526	0.687328	-3.53965
FCGR3A	0.406525	0.406525	2.31981	0.0292448	0.687491	-3.54225
WDR53	0.13989	0.13989	2.31942	0.0292696	0.687491	-3.54295
ACTA1	0.181339	0.181339	2.31882	0.0293073	0.687491	-3.54401
IL17RA	0.191784	0.191784	2.31682	0.0294337	0.689061	-3.54756
IGIP	0.277217	0.277217	2.31651	0.0294533	0.689061	-3.5481
TMEM204	0.145858	0.145858	2.31458	0.0295759	0.689492	-3.55152
COL5A2	0.202162	0.202162	2.31443	0.0295854	0.689492	-3.55179
TDRD3	0.205427	0.205427	2.31441	0.0295871	0.689492	-3.55183
AMIGO3	0.138556	0.138556	2.31424	0.029598	0.689492	-3.55214
WI2-87327B8.2	0.146999	0.146999	2.31217	0.0297302	0.689804	-3.55581
EIF5A2	0.248753	0.248753	2.31213	0.0297325	0.689804	-3.55587
TRBV21OR9-2	0.176094	0.176094	2.31205	0.0297376	0.689804	-3.55601
ATP6V0E2	0.178889	0.178889	2.31205	0.0297377	0.689804	-3.55601
MYADM	0.254678	0.254678	2.3109	0.0298114	0.690341	-3.55805
CD59	0.270646	0.270646	2.30981	0.0298815	0.691376	-3.55998
ACTG1P20	0.170495	0.170495	2.30871	0.029952	0.691875	-3.56192
UNC93B5	0.128512	0.128512	2.30842	0.0299707	0.691875	-3.56244
LYNX1	0.251546	0.251546	2.3056	0.0301533	0.691875	-3.56743
KDELR1	0.222656	0.222656	2.30408	0.0302515	0.691875	-3.57011
MFHAS1	0.240351	0.240351	2.30383	0.0302682	0.691875	-3.57056
RNF112	0.168159	0.168159	2.30375	0.0302735	0.691875	-3.57071
GRAP	0.222329	0.222329	2.30348	0.0302911	0.691875	-3.57118
ESM1	0.270962	0.270962	2.30321	0.0303085	0.691875	-3.57166
GNS	0.307871	0.307871	2.30223	0.0303722	0.69275	-3.57338
PRSS53	0.173983	0.173983	2.30035	0.0304949	0.692904	-3.5767
C1GALT1C1L	0.139872	0.139872	2.30031	0.0304979	0.692904	-3.57678
C16orf72	0.146451	0.146451	2.2998	0.0305312	0.692904	-3.57768
AHDC1	0.149122	0.149122	2.29796	0.0306522	0.693385	-3.58093
SLC18A2	0.200484	0.200484	2.2975	0.0306823	0.693385	-3.58174
RGS3	0.146856	0.146856	2.29716	0.0307048	0.693385	-3.58234
F3	0.335694	0.335694	2.29551	0.0308137	0.694301	-3.58525
OR7E86P	0.171682	0.171682	2.2953	0.0308276	0.694301	-3.58562
KCNQ5-IT1	0.17248	0.17248	2.295	0.0308471	0.694301	-3.58614
FAM151B	0.223134	0.223134	2.29435	0.0308904	0.694703	-3.58729
TMEM79	0.177621	0.177621	2.29202	0.0310454	0.695598	-3.59141
EPO	0.183037	0.183037	2.29184	0.0310571	0.695598	-3.59172
RPS6P22	0.164085	0.164085	2.29183	0.0310576	0.695598	-3.59173
CXCL5	0.539421	0.539421	2.29055	0.0311429	0.696527	-3.59399
SEC23A	0.236703	0.236703	2.29045	0.0311501	0.696527	-3.59417
FGF7P2	0.217602	0.217602	2.29003	0.0311777	0.696574	-3.5949
SNORD89	0.219332	0.219332	2.28823	0.031298	0.697209	-3.59807
ZDHHC16	0.149856	0.149856	2.28631	0.0314273	0.697209	-3.60146
KRTAP10-9	0.168355	0.168355	2.28562	0.0314738	0.697209	-3.60267
SLITRK6	0.37375	0.37375	2.28539	0.0314894	0.697209	-3.60308
CLCN1	0.183627	0.183627	2.28504	0.0315132	0.697209	-3.6037
EPYC	0.570567	0.570567	2.28471	0.031535	0.697209	-3.60427
PRRC1	0.174319	0.174319	2.28469	0.0315366	0.697209	-3.60431
DLC1	0.19205	0.19205	2.28436	0.0315586	0.697209	-3.60488
CYP21A1P	0.148152	0.148152	2.2837	0.0316035	0.697209	-3.60605
FXYD6P3	0.199496	0.199496	2.28067	0.0318092	0.697368	-3.61138
TMX3	0.283135	0.283135	2.28032	0.0318328	0.697368	-3.61198
MAB21L2	0.381667	0.381667	2.27967	0.0318771	0.697368	-3.61313
C1R	0.281722	0.281722	2.27802	0.0319896	0.697368	-3.61602
ZYX	0.150788	0.150788	2.27769	0.0320123	0.697368	-3.6166
TRBV6-5	0.176495	0.176495	2.27749	0.0320259	0.697368	-3.61695
CRIP1P4	0.268173	0.268173	2.27707	0.032055	0.697368	-3.6177
WFDC1	0.332156	0.332156	2.2767	0.0320802	0.697368	-3.61834
ITIH3	0.177037	0.177037	2.27669	0.0320811	0.697368	-3.61836
SSH3	0.122191	0.122191	2.27668	0.0320816	0.697368	-3.61838
KCNE5	0.180953	0.180953	2.27545	0.032166	0.697368	-3.62053
SLC24A3	0.243851	0.243851	2.27354	0.0322975	0.697368	-3.62388
PIK3R5	0.246393	0.246393	2.27333	0.032312	0.697368	-3.62425
GABARAPL1	0.365346	0.365346	2.27255	0.0323661	0.697368	-3.62562
RFPL4AL1	0.157995	0.157995	2.27223	0.0323882	0.697368	-3.62618
CXCL8	0.683502	0.683502	2.27097	0.0324757	0.697937	-3.6284
FBLN2	0.192984	0.192984	2.26833	0.0326591	0.69989	-3.63302
ATP2A1	0.185906	0.185906	2.26746	0.0327197	0.70026	-3.63454
PLA2G5	0.154502	0.154502	2.26648	0.0327882	0.70026	-3.63625
ARSB	0.188792	0.188792	2.26627	0.0328029	0.70026	-3.63662
PCSK1	0.475961	0.475961	2.26625	0.0328047	0.70026	-3.63666
UBE2E2	0.287545	0.287545	2.26517	0.03288	0.700719	-3.63855
TAL1	0.207714	0.207714	2.26404	0.0329594	0.700719	-3.64052
SOWAHD	0.166487	0.166487	2.26404	0.0329595	0.700719	-3.64053
NBL1	0.17845	0.17845	2.26338	0.0330062	0.700719	-3.64169
HIGD2A	0.156508	0.156508	2.26259	0.0330612	0.700719	-3.64305
LRRC32	0.200804	0.200804	2.26187	0.0331124	0.700719	-3.64432
CDY3P	0.234042	0.234042	2.26075	0.0331915	0.700719	-3.64628
CHMP1B	0.153576	0.153576	2.25991	0.0332511	0.700719	-3.64775
ERCC3	0.220343	0.220343	2.25984	0.0332559	0.700719	-3.64787
TGFB2	0.332323	0.332323	2.25947	0.0332823	0.700719	-3.64852
BNIP3	0.198228	0.198228	2.25795	0.0333898	0.701806	-3.65116
ZNRF2P1	0.19736	0.19736	2.25659	0.0334871	0.70274	-3.65355
CTAGE7P	0.165	0.165	2.25419	0.0336586	0.704302	-3.65773
ATP10A	0.193277	0.193277	2.25393	0.0336768	0.704302	-3.65817
RANBP17	0.249183	0.249183	2.25376	0.033689	0.704302	-3.65847
TC2N	0.263805	0.263805	2.25364	0.0336981	0.704302	-3.65869
SFXN3	0.226929	0.226929	2.25315	0.0337334	0.704302	-3.65955
SPRR1A	0.193595	0.193595	2.25261	0.0337717	0.70438	-3.66048
TOMM20P4	0.16252	0.16252	2.25217	0.0338035	0.704505	-3.66125
IL17RD	0.241044	0.241044	2.25153	0.0338495	0.704926	-3.66237
IMPA2	0.149968	0.149968	2.25004	0.033957	0.706626	-3.66496
ATXN1	0.227922	0.227922	2.24902	0.0340306	0.707081	-3.66674
ADGRL2	0.231778	0.231778	2.2477	0.0341266	0.707135	-3.66905
FERMT2	0.285511	0.285511	2.24562	0.0342779	0.70898	-3.67267
FCGBP	0.516415	0.516415	2.24381	0.0344095	0.710033	-3.67581
LXN	0.411399	0.411399	2.24202	0.0345409	0.710652	-3.67892
RPL22L1	0.451757	0.451757	2.24152	0.0345775	0.71087	-3.67979
SMO	0.17413	0.17413	2.24071	0.0346373	0.711028	-3.68121
CRIP1P2	0.195018	0.195018	2.2382	0.0348221	0.713028	-3.68556
QTRT1P1	0.13231	0.13231	2.23785	0.034848	0.713028	-3.68617
FRMD6	0.313343	0.313343	2.23715	0.0348999	0.713028	-3.68739
PTPRM	0.407843	0.407843	2.23691	0.0349175	0.713028	-3.6878
DLL4	0.189639	0.189639	2.23521	0.0350438	0.714004	-3.69075
VSIG8	0.174712	0.174712	2.23364	0.0351608	0.71532	-3.69348
RAB28	0.23919	0.23919	2.23283	0.0352213	0.715709	-3.69489
CCNY	0.17797	0.17797	2.23268	0.0352323	0.715709	-3.69514
HEXA	0.140135	0.140135	2.23009	0.0354257	0.716931	-3.69962
EPGN	0.189336	0.189336	2.22966	0.0354581	0.716931	-3.70037
VPS26BP1	0.193812	0.193812	2.22877	0.0355254	0.717393	-3.70192
FSCN1	0.163515	0.163515	2.22723	0.0356414	0.717628	-3.70459
MTMR14	0.143877	0.143877	2.22625	0.0357153	0.718042	-3.70628
NRBP1	0.18889	0.18889	2.22482	0.0358236	0.71863	-3.70875
PLA2G2F	0.164958	0.164958	2.22434	0.0358604	0.718839	-3.70959
CDCP2	0.147262	0.147262	2.22276	0.0359805	0.719663	-3.71233
ZNF385D-AS2	0.183513	0.183513	2.22204	0.0360347	0.719944	-3.71356
KYNU	0.214727	0.214727	2.22167	0.0360631	0.719944	-3.7142
MYL12A	0.206521	0.206521	2.22092	0.0361203	0.719944	-3.7155
CD81	0.16754	0.16754	2.21964	0.0362184	0.719944	-3.71771
PNPLA3	0.222237	0.222237	2.21926	0.0362474	0.719944	-3.71837
SLAMF1	0.215722	0.215722	2.21856	0.0363011	0.719944	-3.71958
CD300A	0.240495	0.240495	2.21811	0.0363355	0.719944	-3.72035
TP73	0.16936	0.16936	2.21777	0.0363619	0.719944	-3.72094
PTPRU	0.273271	0.273271	2.21753	0.0363806	0.719944	-3.72136
MTMR9LP	0.131756	0.131756	2.21504	0.0365723	0.721979	-3.72566
THAP8	0.155327	0.155327	2.21437	0.0366237	0.722461	-3.7268
CYCSP24	0.186446	0.186446	2.2137	0.0366761	0.722461	-3.72797
ARMCX2	0.118033	0.118033	2.21224	0.0367887	0.722594	-3.73048
SLC8A2	0.173693	0.173693	2.21003	0.0369612	0.72403	-3.7343
RND1	0.175333	0.175333	2.20994	0.0369679	0.72403	-3.73444
KRTAP3-1	0.177525	0.177525	2.20856	0.0370759	0.724449	-3.73683
PSORS1C2	0.165015	0.165015	2.20825	0.0371002	0.724449	-3.73736
NRDC	0.192409	0.192409	2.207	0.0371985	0.724449	-3.73952
ADAMTS7P1	0.156477	0.156477	2.20666	0.0372252	0.724449	-3.74011
FAM157A	0.18027	0.18027	2.20662	0.0372281	0.724449	-3.74017
SLC9B2	0.252008	0.252008	2.20608	0.0372707	0.724675	-3.7411
NUP50	0.264133	0.264133	2.20546	0.0373194	0.724675	-3.74217
CGB2	0.155605	0.155605	2.20398	0.0374356	0.725973	-3.7447
P2RY13	0.244623	0.244623	2.20357	0.0374679	0.725973	-3.74541
FAM171A2	0.136879	0.136879	2.20316	0.0375007	0.725973	-3.74612
OLFML2B	0.239214	0.239214	2.20217	0.0375785	0.725973	-3.74782
FAM43B	0.151446	0.151446	2.20173	0.0376139	0.725973	-3.74858
CYP1B1	0.248934	0.248934	2.201	0.0376712	0.725973	-3.74982
SBNO2	0.292985	0.292985	2.19985	0.0377625	0.725973	-3.7518
LAMA2	0.28975	0.28975	2.19978	0.0377687	0.725973	-3.75193
SMC5-AS1	0.153529	0.153529	2.19971	0.0377739	0.725973	-3.75205
SALL3	0.142902	0.142902	2.19918	0.0378162	0.72606	-3.75296
GAS2L1	0.197407	0.197407	2.19792	0.0379171	0.726465	-3.75513
SNORD114-12	0.230848	0.230848	2.19731	0.0379658	0.726519	-3.75618
SFTPC	0.17769	0.17769	2.19721	0.0379731	0.726519	-3.75634
SMAD7	0.2201	0.2201	2.19341	0.0382784	0.729805	-3.76287
SAA3P	0.130397	0.130397	2.193	0.0383112	0.729919	-3.76357
WAS	0.250208	0.250208	2.19177	0.0384109	0.731195	-3.76568
RCAN1	0.273083	0.273083	2.19135	0.0384445	0.731195	-3.7664
ELK3	0.203864	0.203864	2.19118	0.0384586	0.731195	-3.76669
SMAP2	0.206114	0.206114	2.18997	0.038556	0.731915	-3.76876
PLD1	0.216328	0.216328	2.18965	0.0385818	0.731915	-3.7693
GFAP	0.172808	0.172808	2.18961	0.0385857	0.731915	-3.76939
PRH2	0.161965	0.161965	2.18839	0.0386845	0.731915	-3.77147
LMCD1	0.186303	0.186303	2.1883	0.038692	0.731915	-3.77163
GPRC5B	0.173704	0.173704	2.18806	0.0387109	0.731915	-3.77202
SLC8B1	0.178601	0.178601	2.18746	0.0387603	0.732342	-3.77306
PAFAH2	0.12205	0.12205	2.18617	0.0388651	0.732718	-3.77527
LL21NC02-21A1.1	0.150594	0.150594	2.18461	0.0389924	0.732718	-3.77793
SLC26A1	0.152733	0.152733	2.1844	0.0390101	0.732718	-3.7783
NECAP1P2	0.135439	0.135439	2.1841	0.0390348	0.732718	-3.77881
ZNF280D	0.224298	0.224298	2.18406	0.0390377	0.732718	-3.77888
FADS2	0.281017	0.281017	2.18243	0.0391717	0.734149	-3.78167
PYGO1	0.250331	0.250331	2.1819	0.0392151	0.734149	-3.78257
TRPM5	0.13934	0.13934	2.18066	0.0393172	0.735231	-3.78469
SIRT3	0.134432	0.134432	2.17961	0.039404	0.735508	-3.78648
CREB3L1	0.200056	0.200056	2.17829	0.0395136	0.735508	-3.78874
CD82	0.189502	0.189502	2.17803	0.0395349	0.735508	-3.78918
HACD4	0.384659	0.384659	2.17726	0.0395985	0.735508	-3.79049
AP2M1	0.218328	0.218328	2.1767	0.0396453	0.735508	-3.79145
ATRN	0.197206	0.197206	2.17646	0.039665	0.735508	-3.79186
JAM3	0.269519	0.269519	2.17596	0.0397065	0.735508	-3.79271
PTGS1	0.205615	0.205615	2.17583	0.0397179	0.735508	-3.79294
ACOT9	0.144202	0.144202	2.17553	0.0397422	0.735508	-3.79344
S100A8	0.552965	0.552965	2.17541	0.0397528	0.735508	-3.79366
S100P	0.362595	0.362595	2.175	0.0397863	0.735508	-3.79434
ZFP92	0.144885	0.144885	2.17287	0.0399643	0.735508	-3.79798
LRP10	0.147526	0.147526	2.17262	0.0399855	0.735508	-3.79841
NXN	0.175305	0.175305	2.17014	0.0401938	0.735508	-3.80264
LGALS17A	0.158479	0.158479	2.17002	0.0402041	0.735508	-3.80285
TVP23B	0.161007	0.161007	2.16999	0.0402064	0.735508	-3.80289
CTXN3	0.17022	0.17022	2.16919	0.0402738	0.735508	-3.80426
DLG4	0.213317	0.213317	2.16911	0.0402806	0.735508	-3.80439
DNMT1	0.15655	0.15655	2.16902	0.0402879	0.735508	-3.80454
RBP4	0.177766	0.177766	2.16833	0.0403462	0.735508	-3.80572
PLEKHO1	0.154706	0.154706	2.16823	0.0403546	0.735508	-3.80589
TSSK3	0.199898	0.199898	2.16736	0.0404282	0.735508	-3.80737
PCED1B	0.168519	0.168519	2.16641	0.0405084	0.735508	-3.80898
PERM1	0.166573	0.166573	2.16606	0.040538	0.735508	-3.80957
PGLS	0.177433	0.177433	2.166	0.0405439	0.735508	-3.80969
FCER1G	0.491428	0.491428	2.16588	0.0405535	0.735508	-3.80988
DLEC1	0.324444	0.324444	2.16559	0.0405781	0.735508	-3.81038
RAET1E	0.155003	0.155003	2.16503	0.0406257	0.735508	-3.81133
BST2	0.410295	0.410295	2.16447	0.0406734	0.735508	-3.81229
HTRA4	0.196456	0.196456	2.16417	0.0406991	0.735508	-3.8128
FST	0.172736	0.172736	2.16415	0.0407011	0.735508	-3.81284
B9D1	0.200035	0.200035	2.16336	0.0407676	0.735508	-3.81417
ZNF438	0.287606	0.287606	2.16335	0.0407689	0.735508	-3.81419
TMEM42	0.157198	0.157198	2.16289	0.0408083	0.735508	-3.81498
CSTB	0.207703	0.207703	2.16197	0.0408864	0.735508	-3.81653
APOA1	0.161922	0.161922	2.1619	0.0408924	0.735508	-3.81665
MSNP1	0.17567	0.17567	2.1614	0.0409351	0.735508	-3.8175
FAM98A	0.201436	0.201436	2.16131	0.0409426	0.735508	-3.81765
AMER1	0.189422	0.189422	2.16125	0.0409484	0.735508	-3.81776
ARMCX5	0.137481	0.137481	2.15898	0.0411429	0.737041	-3.82162
TFF2	0.417279	0.417279	2.15881	0.0411571	0.737041	-3.8219
CRYAB	0.27532	0.27532	2.15868	0.0411687	0.737041	-3.82213
USP38	0.211414	0.211414	2.15822	0.0412083	0.737163	-3.82291
TMEM92-AS1	0.141859	0.141859	2.15797	0.0412295	0.737163	-3.82333
TBC1D28	0.147706	0.147706	2.1555	0.0414428	0.739315	-3.82752
ROR2	0.303204	0.303204	2.15539	0.041452	0.739315	-3.8277
BDH2P1	0.153973	0.153973	2.15179	0.0417647	0.741004	-3.83381
CUEDC2	0.171692	0.171692	2.15173	0.04177	0.741004	-3.83391
FTH1P24	0.120878	0.120878	2.14969	0.0419482	0.742855	-3.83737
PRKCG	0.184947	0.184947	2.14929	0.0419832	0.742855	-3.83805
SNORD81	0.260374	0.260374	2.14887	0.0420197	0.742974	-3.83875
FOXN3P1	0.17402	0.17402	2.14818	0.0420805	0.742974	-3.83993
ROR1	0.24965	0.24965	2.14648	0.0422296	0.742974	-3.8428
EOGT	0.199734	0.199734	2.14619	0.042255	0.742974	-3.84329
HCK	0.214758	0.214758	2.14466	0.0423899	0.742974	-3.84587
HMGN1P9	0.175827	0.175827	2.1446	0.0423956	0.742974	-3.84598
NCF1	0.309489	0.309489	2.14373	0.0424721	0.742974	-3.84745
PHF24	0.135893	0.135893	2.14341	0.0425007	0.742974	-3.84799
SLC41A1	0.161397	0.161397	2.14251	0.0425799	0.742974	-3.8495
PPP3CA	0.276629	0.276629	2.14175	0.042648	0.742974	-3.8508
RCBTB2	0.148877	0.148877	2.14162	0.0426588	0.742974	-3.85101
UCMA	0.139567	0.139567	2.14153	0.0426675	0.742974	-3.85117
ACVR2A	0.217865	0.217865	2.14042	0.0427659	0.742974	-3.85304
CTSC	0.214493	0.214493	2.14028	0.0427785	0.742974	-3.85328
ACTN1	0.276254	0.276254	2.13982	0.0428196	0.742974	-3.85406
PLK2	0.411104	0.411104	2.13925	0.0428697	0.742974	-3.85501
VCAN-AS1	0.355393	0.355393	2.13865	0.0429233	0.742974	-3.85602
NT5C3AP1	0.14787	0.14787	2.13845	0.0429413	0.742974	-3.85636
LDHA	0.180557	0.180557	2.13834	0.0429513	0.742974	-3.85655
EGFLAM	0.188674	0.188674	2.13821	0.0429632	0.742974	-3.85678
MASP1	0.229043	0.229043	2.13744	0.0430321	0.742974	-3.85808
GRB2	0.193849	0.193849	2.13681	0.0430879	0.742974	-3.85913
TSPEAR-AS1	0.204912	0.204912	2.13582	0.0431771	0.742974	-3.86081
SEC16A	0.14039	0.14039	2.13558	0.0431981	0.742974	-3.8612
TNFRSF14	0.152739	0.152739	2.13537	0.0432168	0.742974	-3.86155
THBS1	0.324957	0.324957	2.13458	0.0432879	0.7433	-3.86288
RILPL2	0.195336	0.195336	2.13268	0.0434598	0.744846	-3.8661
CTC1	0.173026	0.173026	2.13156	0.0435605	0.745188	-3.86798
SEC24D	0.297526	0.297526	2.13081	0.0436283	0.745188	-3.86924
MOCS1	0.139024	0.139024	2.13003	0.0436997	0.745188	-3.87056
IFT122	0.174338	0.174338	2.12979	0.0437213	0.745188	-3.87096
TRBV7-9	0.129176	0.129176	2.12947	0.0437499	0.745188	-3.87149
FIBIN	0.200563	0.200563	2.12915	0.0437794	0.745188	-3.87204
BCRP5	0.126413	0.126413	2.12897	0.0437953	0.745188	-3.87233
FLRT2	0.266264	0.266264	2.12881	0.0438105	0.745188	-3.87262
HYI	0.155035	0.155035	2.12806	0.0438787	0.745188	-3.87388
EHD2	0.179935	0.179935	2.1279	0.0438929	0.745188	-3.87414
CSNK1G2	0.155565	0.155565	2.12745	0.0439339	0.745188	-3.87489
RYR2	0.240597	0.240597	2.12734	0.0439443	0.745188	-3.87509
OXCT1	0.215493	0.215493	2.1266	0.0440116	0.745188	-3.87633
BHLHE40	0.212568	0.212568	2.12514	0.0441452	0.745188	-3.87878
G3BP2	0.176555	0.176555	2.1249	0.0441673	0.745188	-3.87919
LTBP3	0.141507	0.141507	2.12465	0.0441894	0.745188	-3.87959
S100A9	0.400534	0.400534	2.12423	0.044228	0.745188	-3.8803
TLL2	0.133096	0.133096	2.12394	0.0442549	0.745188	-3.88079
LYN	0.24827	0.24827	2.12354	0.0442912	0.745188	-3.88146
LRRC4B	0.163253	0.163253	2.12332	0.0443117	0.745188	-3.88183
OR13D2P	0.154571	0.154571	2.12293	0.0443476	0.745188	-3.88249
RBPMS2	0.195949	0.195949	2.12237	0.0443992	0.745188	-3.88343
BBS7	0.215579	0.215579	2.12065	0.0445574	0.745188	-3.88631
SH3RF3	0.154288	0.154288	2.1199	0.0446269	0.745188	-3.88758
STARP1	0.131996	0.131996	2.11987	0.04463	0.745188	-3.88763
P2RX5-TAX1BP3	0.189478	0.189478	2.11973	0.0446425	0.745188	-3.88786
SEC61A1	0.204818	0.204818	2.11973	0.0446431	0.745188	-3.88787
TEP1	0.14084	0.14084	2.11928	0.0446841	0.745188	-3.88861
PRKCSH	0.153629	0.153629	2.1192	0.044692	0.745188	-3.88876
RBM18	0.137181	0.137181	2.11909	0.0447024	0.745188	-3.88894
ACTBP14	0.16566	0.16566	2.11902	0.044708	0.745188	-3.88905
ST6GALNAC1	0.376159	0.376159	2.11769	0.0448314	0.74608	-3.89128
MSI2	0.189816	0.189816	2.11746	0.0448531	0.74608	-3.89167
ASAH1	0.246496	0.246496	2.11656	0.0449369	0.746336	-3.89318
TSPAN18	0.190239	0.190239	2.11552	0.0450337	0.74676	-3.89492
PTGER2	0.237634	0.237634	2.11538	0.0450463	0.74676	-3.89515
ZNF382	0.262311	0.262311	2.11523	0.0450607	0.74676	-3.89541
RPL5P7	0.128303	0.128303	2.11293	0.0452759	0.74676	-3.89927
COX20P2	0.13449	0.13449	2.11274	0.0452934	0.74676	-3.89958
TWSG1	0.146688	0.146688	2.11057	0.0454967	0.74676	-3.9032
OR10T2	0.14605	0.14605	2.11052	0.0455018	0.74676	-3.90329
RAPGEF6	0.154829	0.154829	2.11045	0.0455084	0.74676	-3.90341
CCDC97	0.110811	0.110811	2.11035	0.0455174	0.74676	-3.90357
RUNX1T1	0.225523	0.225523	2.10995	0.045555	0.74676	-3.90424
CTF2P	0.166469	0.166469	2.10762	0.0457754	0.748758	-3.90815
ZBTB7C	0.306183	0.306183	2.1054	0.0459855	0.751344	-3.91185
NCAPD2	0.231097	0.231097	2.10407	0.0461118	0.752058	-3.91407
FBXL15	0.146814	0.146814	2.1037	0.046147	0.752091	-3.91469
PTGER3	0.189228	0.189228	2.10347	0.0461689	0.752091	-3.91507
PRAME	0.139041	0.139041	2.10243	0.0462686	0.752368	-3.91681
FCGR2C	0.376624	0.376624	2.10145	0.0463618	0.753434	-3.91844
SLC2A14	0.347057	0.347057	2.10045	0.046458	0.754548	-3.92012
LPGAT1	0.291105	0.291105	2.09746	0.0467448	0.755287	-3.92509
RAB5A	0.203543	0.203543	2.09716	0.0467743	0.755287	-3.9256
MXRA5Y	0.148994	0.148994	2.0969	0.0467991	0.755287	-3.92603
SKI	0.160335	0.160335	2.09646	0.0468419	0.755287	-3.92677
YWHAEP2	0.175049	0.175049	2.09585	0.046901	0.755287	-3.92779
CDH2	0.186939	0.186939	2.09571	0.0469141	0.755287	-3.92801
PRND	0.160599	0.160599	2.09419	0.0470614	0.755287	-3.93055
PRICKLE1	0.128146	0.128146	2.09406	0.0470735	0.755287	-3.93075
IRAK2	0.23477	0.23477	2.09395	0.0470849	0.755287	-3.93095
CSDE1	0.173936	0.173936	2.09389	0.0470905	0.755287	-3.93105
ZNF561-AS1	0.173396	0.173396	2.09379	0.0470999	0.755287	-3.93121
ROCK1	0.168153	0.168153	2.09282	0.047194	0.755712	-3.93282
FBXO22	0.183473	0.183473	2.09184	0.0472896	0.756543	-3.93445
SMYD1	0.171307	0.171307	2.09144	0.047329	0.756543	-3.93513
SLC36A1	0.146834	0.146834	2.09093	0.0473786	0.756893	-3.93597
HLA-DRB1	0.242835	0.242835	2.08959	0.0475095	0.75794	-3.9382
EGFL7	0.133356	0.133356	2.0894	0.0475274	0.75794	-3.9385
ACTR10	0.184791	0.184791	2.08722	0.0477414	0.759856	-3.94213
NMRK1	0.301098	0.301098	2.08578	0.0478832	0.760167	-3.94453
ZNF816	0.143603	0.143603	2.08547	0.0479135	0.760167	-3.94504
ZNF391	0.171126	0.171126	2.08543	0.0479177	0.760167	-3.94511
GXYLT1	0.191307	0.191307	2.08417	0.0480416	0.761671	-3.94719
SCARNA15	0.15684	0.15684	2.08211	0.0482454	0.762015	-3.95061
CCDC8	0.155223	0.155223	2.08116	0.0483402	0.762015	-3.95219
AKR1B1P8	0.162867	0.162867	2.08065	0.048391	0.762015	-3.95304
CCL3	0.21333	0.21333	2.08057	0.0483988	0.762015	-3.95317
OR51AB1P	0.129986	0.129986	2.08036	0.0484193	0.762015	-3.95351
RPL7P17	0.174185	0.174185	2.07962	0.0484928	0.762015	-3.95474
FEZF1-AS1	0.177953	0.177953	2.07931	0.0485239	0.762015	-3.95525
RBPMS-AS1	0.157818	0.157818	2.07928	0.0485267	0.762015	-3.9553
TRIM8	0.150604	0.150604	2.07754	0.0487003	0.762015	-3.95818
A2ML1	0.118503	0.118503	2.07743	0.0487115	0.762015	-3.95837
PZP	0.17259	0.17259	2.07726	0.0487284	0.762015	-3.95865
CNP	0.143238	0.143238	2.077	0.0487543	0.762015	-3.95908
HAUS3	0.136607	0.136607	2.07668	0.0487863	0.762015	-3.9596
ANKRD6	0.226741	0.226741	2.07512	0.0489434	0.762015	-3.9622
SNCAIP	0.223554	0.223554	2.07203	0.049254	0.764451	-3.9673
APOBEC3C	0.163011	0.163011	2.07171	0.0492868	0.764451	-3.96783
SLC25A5P8	0.126576	0.126576	2.0715	0.0493077	0.764451	-3.96818
TBC1D1	0.217929	0.217929	2.07086	0.0493723	0.764585	-3.96923
POLR2A	0.185422	0.185422	2.07037	0.0494225	0.764928	-3.97005
DYRK3	0.234266	0.234266	2.0686	0.0496018	0.765206	-3.97297
TMEM192	0.164188	0.164188	2.06787	0.0496755	0.765206	-3.97417
BTD	0.187384	0.187384	2.06754	0.0497098	0.765206	-3.97472
WNT5A	0.267516	0.267516	2.06718	0.0497457	0.765206	-3.9753
MRPS36P1	0.194784	0.194784	2.06697	0.049767	0.765206	-3.97565
AOC4P	0.14669	0.14669	2.06653	0.0498122	0.765206	-3.97638
ZDBF2	0.247703	0.247703	2.06643	0.0498222	0.765206	-3.97654
C2CD4B	0.170663	0.170663	2.06633	0.0498328	0.765206	-3.97671
SNX29P1	0.159458	0.159458	2.06522	0.0499466	0.765382	-3.97855
S100A12	0.374858	0.374858	2.06461	0.0500087	0.765382	-3.97955
ATP10D	0.296009	0.296009	2.06438	0.0500321	0.765382	-3.97993
C2orf76	0.250088	0.250088	2.06132	0.0503466	0.768034	-3.98498
DDX51	0.160665	0.160665	2.06115	0.0503642	0.768034	-3.98526
PCNP	0.115932	0.115932	2.06097	0.0503827	0.768034	-3.98555
LPAR6	0.293093	0.293093	2.0597	0.0505131	0.769592	-3.98764
STIM2	0.260226	0.260226	2.05891	0.0505947	0.769627	-3.98894
VAMP2	0.154539	0.154539	2.05886	0.0506	0.769627	-3.98902
MSANTD3	0.244118	0.244118	2.058	0.050689	0.770247	-3.99043
TVP23CP1	0.179212	0.179212	2.0576	0.0507308	0.770247	-3.9911
DUSP4	0.309381	0.309381	2.05547	0.0509514	0.77062	-3.99459
MSRB3	0.226752	0.226752	2.0554	0.0509592	0.77062	-3.99471
DPH3	0.145797	0.145797	2.05461	0.0510416	0.771135	-3.99601
ATF7IP	0.216236	0.216236	2.05074	0.0514466	0.772675	-4.00237
FAM193B	0.157277	0.157277	2.05051	0.05147	0.772675	-4.00274
PDIA3	0.271445	0.271445	2.05032	0.0514899	0.772675	-4.00305
HCAR1	0.16724	0.16724	2.04985	0.0515398	0.772675	-4.00383
KLHL5	0.276593	0.276593	2.04949	0.0515772	0.772675	-4.00441
CD72	0.157427	0.157427	2.04908	0.0516204	0.772675	-4.00509
CD300E	0.135022	0.135022	2.04908	0.0516211	0.772675	-4.0051
SNORA35	0.203667	0.203667	2.04758	0.0517791	0.773705	-4.00756
TMEM144	0.216442	0.216442	2.04609	0.0519363	0.773999	-4.00999
HECW2	0.168123	0.168123	2.04573	0.0519745	0.774145	-4.01058
OR7A18P	0.168046	0.168046	2.04544	0.052005	0.774177	-4.01106
BICD1	0.23397	0.23397	2.04494	0.0520579	0.774542	-4.01187
VSTM4	0.26169	0.26169	2.04433	0.0521226	0.775082	-4.01287
ADAMTS14	0.134763	0.134763	2.04324	0.0522385	0.775833	-4.01466
CES1P1	0.135534	0.135534	2.04197	0.0523746	0.776216	-4.01675
ZBTB25	0.227628	0.227628	2.04142	0.0524335	0.776216	-4.01765
KLK10	0.196891	0.196891	2.04116	0.0524609	0.776216	-4.01807
DNAJC25-GNG10	0.181311	0.181311	2.03993	0.0525917	0.776216	-4.02007
CYBB	0.191664	0.191664	2.03927	0.0526632	0.776216	-4.02116
WDR26	0.189898	0.189898	2.03924	0.0526658	0.776216	-4.0212
PARVB	0.199021	0.199021	2.03896	0.0526963	0.776216	-4.02167
YEATS2	0.200692	0.200692	2.0386	0.0527344	0.776216	-4.02225
KCNK2	0.131957	0.131957	2.03856	0.052739	0.776216	-4.02232
HIPK2	0.189189	0.189189	2.03583	0.0530332	0.777611	-4.02679
PTPRE	0.214651	0.214651	2.03472	0.0531529	0.778051	-4.0286
MARK4	0.132986	0.132986	2.03402	0.0532285	0.778051	-4.02974
UNC93B2	0.10819	0.10819	2.03294	0.0533456	0.778051	-4.03151
HRAT17	0.160203	0.160203	2.03268	0.0533733	0.778051	-4.03192
GNAO1	0.131808	0.131808	2.03267	0.0533748	0.778051	-4.03194
GATAD2A	0.151279	0.151279	2.03229	0.053416	0.778051	-4.03256
SLC23A2	0.195441	0.195441	2.0315	0.0535011	0.778051	-4.03384
STEAP2	0.277537	0.277537	2.0314	0.0535124	0.778051	-4.03401
CCBE1	0.166506	0.166506	2.03091	0.0535654	0.778051	-4.03481
BNIP3P29	0.212643	0.212643	2.03081	0.0535763	0.778051	-4.03497
PYGL	0.17943	0.17943	2.03023	0.0536399	0.778051	-4.03592
LETM2	0.164692	0.164692	2.0291	0.053763	0.778051	-4.03776
RGR	0.137683	0.137683	2.02824	0.0538574	0.778051	-4.03917
MS4A4E	0.188931	0.188931	2.02823	0.053858	0.778051	-4.03918
C1orf229	0.142338	0.142338	2.02734	0.0539555	0.77818	-4.04063
ZNF602P	0.154801	0.154801	2.02651	0.0540461	0.778377	-4.04198
CD68	0.208561	0.208561	2.02646	0.054052	0.778377	-4.04207
TMEM50B	0.182299	0.182299	2.02643	0.0540547	0.778377	-4.04211
FNBP1	0.179724	0.179724	2.02573	0.0541323	0.778672	-4.04326
ARHGAP25	0.173642	0.173642	2.02523	0.0541867	0.779044	-4.04406
ZDHHC24	0.113293	0.113293	2.02265	0.0544714	0.780837	-4.04827
OR7C1	0.127104	0.127104	2.02107	0.0546456	0.781451	-4.05083
CPXM2	0.237667	0.237667	2.02066	0.0546909	0.781451	-4.05149
PLIN4	0.115916	0.115916	2.01976	0.0547907	0.781451	-4.05295
ST6GAL2	0.486169	0.486169	2.01974	0.0547934	0.781451	-4.05299
ALPK2	0.188722	0.188722	2.01905	0.0548701	0.781451	-4.05411
CD80	0.154691	0.154691	2.01869	0.0549098	0.781451	-4.05469
PTPRN	0.171374	0.171374	2.01867	0.0549121	0.781451	-4.05473
MCHR1	0.198528	0.198528	2.01852	0.0549288	0.781451	-4.05497
RHOT2	0.168144	0.168144	2.01851	0.0549306	0.781451	-4.055
C5orf46	0.261266	0.261266	2.01803	0.0549838	0.781451	-4.05577
OR2H4P	0.193352	0.193352	2.01768	0.0550229	0.781456	-4.05634
FSTL3	0.160689	0.160689	2.01545	0.0552713	0.783498	-4.05996
LMO7-AS1	0.302884	0.302884	2.01406	0.055427	0.783703	-4.06221
FOXP4-AS1	0.106594	0.106594	2.01397	0.0554379	0.783703	-4.06237
NLRC4	0.203099	0.203099	2.01127	0.0557414	0.783703	-4.06674
AKAP10	0.214987	0.214987	2.01098	0.0557739	0.783703	-4.06721
EIF4E1B	0.118261	0.118261	2.0109	0.0557821	0.783703	-4.06733
CD200	0.395502	0.395502	2.00964	0.0559253	0.783703	-4.06938
LRRC8C	0.180592	0.180592	2.00957	0.0559325	0.783703	-4.06948
PDE10A	0.278185	0.278185	2.0094	0.0559518	0.783703	-4.06976
TM6SF1	0.187923	0.187923	2.00876	0.0560245	0.783703	-4.0708
PLK3	0.146634	0.146634	2.00871	0.0560298	0.783703	-4.07087
YTHDC2	0.11685	0.11685	2.00858	0.0560447	0.783703	-4.07109
CACNA1C	0.18377	0.18377	2.00855	0.0560482	0.783703	-4.07114
OR52E3P	0.140093	0.140093	2.00839	0.0560661	0.783703	-4.07139
BSND	0.143481	0.143481	2.00736	0.0561838	0.783703	-4.07307
NCS1	0.15638	0.15638	2.00718	0.0562042	0.783703	-4.07336
GXYLT2	0.224557	0.224557	2.00706	0.0562171	0.783703	-4.07355
KIAA1755	0.144025	0.144025	2.00705	0.0562184	0.783703	-4.07357
RAI14	0.239388	0.239388	2.00687	0.056239	0.783703	-4.07386
CCDC144NL-AS1	0.180685	0.180685	2.00604	0.0563338	0.783703	-4.07521
B4GALT4	0.178678	0.178678	2.00573	0.0563687	0.783703	-4.0757
ARID5A	0.132196	0.132196	2.00505	0.0564455	0.783703	-4.07679
LSM14A	0.138098	0.138098	2.00503	0.056448	0.783703	-4.07683
SLC11A1	0.279805	0.279805	2.00468	0.0564886	0.783703	-4.0774
RGS16	0.16436	0.16436	2.00372	0.0565974	0.783703	-4.07894
BTN3A1	0.181691	0.181691	2.00362	0.0566092	0.783703	-4.07911
KLF2	0.14574	0.14574	2.00357	0.0566148	0.783703	-4.07919
PLCL2-AS1	0.160418	0.160418	2.00326	0.0566502	0.783703	-4.07969
OR5AU1	0.182443	0.182443	2.00317	0.0566601	0.783703	-4.07983
ANXA2R	0.213928	0.213928	2.00283	0.0566997	0.783703	-4.08039
PPIL1	0.157968	0.157968	2.00254	0.0567326	0.783703	-4.08086
CFAP44-AS1	0.142888	0.142888	2.00222	0.0567697	0.783703	-4.08138
KRT76	0.131732	0.131732	2.00214	0.0567784	0.783703	-4.0815
KLF7P1	0.163365	0.163365	2.00189	0.0568075	0.783708	-4.08191
PPFIA2	0.180438	0.180438	2.00116	0.0568911	0.784436	-4.08309
TCF21	0.151972	0.151972	1.99973	0.0570553	0.785544	-4.08539
TNFRSF1B	0.180855	0.180855	1.99973	0.0570556	0.785544	-4.0854
PPP1R9B	0.159194	0.159194	1.99934	0.0571004	0.785763	-4.08603
COLCA1	0.18759	0.18759	1.99905	0.0571334	0.785797	-4.08649
RPL23AP82	0.141075	0.141075	1.99752	0.0573098	0.786613	-4.08895
BMS1P15	0.181511	0.181511	1.9973	0.057335	0.786613	-4.08931
LIMS2	0.20568	0.20568	1.9963	0.0574506	0.787066	-4.09092
FABP12P1	0.140374	0.140374	1.9962	0.0574628	0.787066	-4.09109
RRP12	0.181555	0.181555	1.99498	0.0576038	0.788201	-4.09305
C3orf70	0.153319	0.153319	1.99381	0.0577399	0.788904	-4.09493
GOLGA8A	0.155251	0.155251	1.99264	0.0578761	0.788904	-4.09682
PRSS2	0.499794	0.499794	1.99248	0.0578954	0.788904	-4.09708
SULT1C3	0.159023	0.159023	1.99209	0.0579407	0.788904	-4.09771
AUH	0.143824	0.143824	1.99162	0.0579954	0.788904	-4.09846
IFI16	0.318461	0.318461	1.99161	0.0579966	0.788904	-4.09848
DNM1P31	0.122774	0.122774	1.99081	0.0580899	0.788904	-4.09976
MCAT	0.137426	0.137426	1.99074	0.0580983	0.788904	-4.09988
M1AP	0.122901	0.122901	1.99065	0.0581087	0.788904	-4.10002
PFN4	0.129482	0.129482	1.98861	0.0583481	0.7909	-4.10331
TRAJ41	0.308982	0.308982	1.98806	0.0584117	0.790949	-4.10418
NRCAM	0.209979	0.209979	1.98765	0.0584601	0.790949	-4.10484
ASMTL	0.148381	0.148381	1.98763	0.0584622	0.790949	-4.10487
PRSS33	0.134487	0.134487	1.98615	0.0586372	0.792531	-4.10726
USP41	0.418677	0.418677	1.98527	0.0587406	0.793536	-4.10867
NUMA1	0.1693	0.1693	1.98207	0.05912	0.796711	-4.11381
ITGAV	0.200621	0.200621	1.97917	0.0594645	0.798655	-4.11845
CLIC4P2	0.138195	0.138195	1.97913	0.0594696	0.798655	-4.11851
HAUS6P2	0.191592	0.191592	1.97903	0.0594822	0.798655	-4.11868
GOLGA8F	0.14752	0.14752	1.97871	0.05952	0.798655	-4.11919
SLC22A17	0.154956	0.154956	1.97869	0.059522	0.798655	-4.11922
KCNMA1-AS1	0.128812	0.128812	1.97854	0.0595408	0.798655	-4.11947
FAM178B	0.142708	0.142708	1.97793	0.0596135	0.798655	-4.12044
ANXA5	0.302837	0.302837	1.9779	0.0596169	0.798655	-4.12049
ZFPL1	0.168866	0.168866	1.97698	0.0597269	0.798766	-4.12196
SEMG2	0.152131	0.152131	1.97646	0.0597888	0.798766	-4.12279
TAS2R62P	0.220133	0.220133	1.97643	0.0597925	0.798766	-4.12284
VTI1BP4	0.130918	0.130918	1.97508	0.0599554	0.798972	-4.12501
PIP4K2A	0.245082	0.245082	1.97486	0.0599813	0.798972	-4.12535
PPIL2	0.158045	0.158045	1.97424	0.0600557	0.798972	-4.12634
PDXK	0.145216	0.145216	1.97379	0.0601101	0.798972	-4.12706
RHBDL3	0.173461	0.173461	1.97369	0.0601218	0.798972	-4.12722
DPRXP3	0.171836	0.171836	1.97362	0.0601304	0.798972	-4.12733
SNORD93	0.370038	0.370038	1.97326	0.0601737	0.798972	-4.12791
LMOD1	0.171856	0.171856	1.97203	0.060323	0.798972	-4.12988
HMGN3	0.19215	0.19215	1.97126	0.060416	0.798972	-4.13111
MICU1	0.230485	0.230485	1.97113	0.0604318	0.798972	-4.13132
SUSD2	0.161992	0.161992	1.97092	0.0604572	0.798972	-4.13166
ZSCAN25	0.150172	0.150172	1.97084	0.060467	0.798972	-4.13179
FAM177B	0.432482	0.432482	1.97058	0.0604981	0.798972	-4.1322
GPR4	0.175972	0.175972	1.97041	0.0605182	0.798972	-4.13246
TGIF1	0.216345	0.216345	1.97039	0.0605209	0.798972	-4.1325
MORF4L1P1	0.220842	0.220842	1.96964	0.0606121	0.798972	-4.1337
FXYD5	0.246814	0.246814	1.96945	0.0606348	0.798972	-4.134
NFRKB	0.128656	0.128656	1.96921	0.0606647	0.798972	-4.13439
VWA1	0.132103	0.132103	1.96762	0.0608579	0.799972	-4.13692
CYYR1	0.252413	0.252413	1.96572	0.06109	0.801389	-4.13996
ABTB1	0.134787	0.134787	1.96507	0.0611692	0.801389	-4.14099
BHLHE40-AS1	0.129311	0.129311	1.96449	0.0612402	0.801389	-4.14192
GUCA2B	0.145363	0.145363	1.96393	0.0613088	0.801389	-4.14281
IFNA16	0.1705	0.1705	1.96351	0.0613607	0.801389	-4.14348
MAP4	0.178748	0.178748	1.96346	0.0613667	0.801389	-4.14356
DCBLD2	0.327634	0.327634	1.96323	0.0613944	0.801389	-4.14392
RASSF2	0.222513	0.222513	1.96296	0.0614279	0.801389	-4.14435
IGFBP4	0.154333	0.154333	1.96294	0.0614299	0.801389	-4.14438
OLR1	0.336866	0.336866	1.96264	0.0614664	0.801389	-4.14485
RPS17P13	0.146507	0.146507	1.96204	0.0615413	0.801389	-4.14582
OSTC	0.228624	0.228624	1.96156	0.0615998	0.801389	-4.14658
MIF	0.169321	0.169321	1.96131	0.0616303	0.801389	-4.14698
ZMYND11	0.15852	0.15852	1.96075	0.0616995	0.801389	-4.14787
PHLDB2	0.31809	0.31809	1.95956	0.0618461	0.801542	-4.14976
SP2	0.145582	0.145582	1.95951	0.0618524	0.801542	-4.14984
CPEB2	0.186602	0.186602	1.95941	0.0618646	0.801542	-4.15
CCDC25	0.216214	0.216214	1.95902	0.0619128	0.801542	-4.15062
KCNMA1	0.190228	0.190228	1.95848	0.0619796	0.801542	-4.15148
AP3D1	0.166356	0.166356	1.95798	0.0620425	0.801542	-4.15228
PDZRN3	0.133724	0.133724	1.95706	0.0621565	0.801542	-4.15375
ELN	0.112298	0.112298	1.956	0.0622882	0.801542	-4.15543
GMIP	0.181756	0.181756	1.95593	0.0622961	0.801542	-4.15553
FEZF1	0.191805	0.191805	1.95587	0.062304	0.801542	-4.15563
LAIR1	0.175909	0.175909	1.95578	0.0623147	0.801542	-4.15577
ANXA1	0.34438	0.34438	1.95527	0.0623779	0.801542	-4.15658
FUT11	0.167089	0.167089	1.95484	0.0624327	0.801542	-4.15728
UAP1L1	0.143217	0.143217	1.954	0.062537	0.801542	-4.1586
YWHAEP3	0.163968	0.163968	1.95377	0.0625661	0.801542	-4.15897
E4F1	0.128264	0.128264	1.95347	0.0626035	0.801542	-4.15945
TYK2	0.145559	0.145559	1.95144	0.0628565	0.801542	-4.16266
CD248	0.309478	0.309478	1.95106	0.062905	0.801542	-4.16327
GLIPR2	0.142731	0.142731	1.95096	0.0629173	0.801542	-4.16343
MSANTD3-TMEFF1	0.161871	0.161871	1.95044	0.0629827	0.801542	-4.16426
FAM138E	0.143387	0.143387	1.94916	0.0631434	0.801542	-4.16628
SLC12A6	0.223753	0.223753	1.94904	0.0631581	0.801542	-4.16647
SSX3	0.150422	0.150422	1.94874	0.0631967	0.801542	-4.16696
CDY14P	0.153313	0.153313	1.94867	0.063205	0.801542	-4.16706
EMP3	0.284811	0.284811	1.94855	0.0632202	0.801542	-4.16725
IFT172	0.132704	0.132704	1.9482	0.063264	0.801542	-4.1678
CCNO	0.178262	0.178262	1.94816	0.0632686	0.801542	-4.16786
CACNA1C-AS3	0.152522	0.152522	1.94806	0.0632815	0.801542	-4.16802
PLPPR4	0.267277	0.267277	1.94795	0.0632962	0.801542	-4.16821
ARHGEF28	0.184476	0.184476	1.94788	0.0633042	0.801542	-4.16831
S1PR1	0.204418	0.204418	1.94766	0.0633319	0.801542	-4.16865
RGL2	0.201543	0.201543	1.94644	0.0634861	0.801976	-4.17059
ZNF423	0.141966	0.141966	1.94597	0.063546	0.801976	-4.17134
ETV1	0.412478	0.412478	1.94511	0.0636545	0.801976	-4.17269
NPTN-IT1	0.147316	0.147316	1.94508	0.0636589	0.801976	-4.17275
C3	0.363884	0.363884	1.94415	0.0637761	0.801976	-4.17421
SLC9A3R2	0.128313	0.128313	1.94353	0.0638552	0.801976	-4.1752
FURIN	0.182784	0.182784	1.94287	0.0639395	0.801976	-4.17625
IL15RA	0.124082	0.124082	1.94282	0.0639454	0.801976	-4.17632
RASGRP4	0.145699	0.145699	1.94228	0.0640141	0.801976	-4.17717
DVL3	0.114509	0.114509	1.94219	0.0640254	0.801976	-4.17731
TULP2	0.115325	0.115325	1.94183	0.0640712	0.801976	-4.17788
PRKCH	0.10422	0.10422	1.94121	0.0641504	0.801976	-4.17887
PKN3	0.138698	0.138698	1.9394	0.064382	0.801976	-4.18173
SLC9B1P2	0.170778	0.170778	1.93906	0.0644254	0.801976	-4.18226
MMP1	0.326511	0.326511	1.93895	0.0644398	0.801976	-4.18244
NCOA1	0.158643	0.158643	1.93863	0.0644804	0.801976	-4.18294
ADCY2	0.136482	0.136482	1.93804	0.0645567	0.801976	-4.18388
IQCG	0.192879	0.192879	1.93796	0.0645663	0.801976	-4.184
PPM1M	0.129439	0.129439	1.9377	0.0645998	0.801976	-4.18441
SCN11A	0.141321	0.141321	1.93765	0.064606	0.801976	-4.18449
SYDE1	0.150691	0.150691	1.93699	0.0646912	0.801976	-4.18554
XPOT	0.168534	0.168534	1.93677	0.0647192	0.801976	-4.18588
BTBD19	0.156358	0.156358	1.93673	0.0647241	0.801976	-4.18594
GUSBP11	0.153348	0.153348	1.93637	0.0647707	0.801976	-4.18651
NKX6-3	0.133065	0.133065	1.93485	0.0649663	0.801976	-4.18891
ACTN2	0.166308	0.166308	1.9347	0.0649862	0.801976	-4.18915
TTLL11-IT1	0.144061	0.144061	1.93431	0.0650362	0.801976	-4.18976
C5orf24	0.158774	0.158774	1.93351	0.0651392	0.801976	-4.19102
MCEMP1	0.159953	0.159953	1.93323	0.0651756	0.801976	-4.19146
WBP1L	0.197719	0.197719	1.93274	0.0652397	0.801976	-4.19224
AGBL5-IT1	0.114424	0.114424	1.93225	0.0653026	0.801976	-4.19301
C17orf67	0.122916	0.122916	1.93176	0.0653662	0.801976	-4.19378
NPL	0.280244	0.280244	1.93172	0.0653721	0.801976	-4.19385
C1orf74	0.152726	0.152726	1.93109	0.0654528	0.801976	-4.19483
NPDC1	0.141193	0.141193	1.93092	0.0654758	0.801976	-4.19511
NDUFB4	0.180584	0.180584	1.93092	0.065476	0.801976	-4.19511
CYP4F60P	0.138824	0.138824	1.93069	0.0655048	0.801976	-4.19546
NACA	0.12882	0.12882	1.93063	0.0655129	0.801976	-4.19556
PGBD1	0.144005	0.144005	1.92992	0.0656053	0.801976	-4.19668
SELPLG	0.208251	0.208251	1.92964	0.0656417	0.801976	-4.19712
TLR6	0.322396	0.322396	1.92951	0.0656585	0.801976	-4.19732
SLC25A51	0.159912	0.159912	1.92929	0.0656875	0.801976	-4.19767
HTR2C	0.168155	0.168155	1.92852	0.0657877	0.801976	-4.19888
CEND1	0.133679	0.133679	1.92799	0.0658571	0.801976	-4.19972
TFF3	0.294113	0.294113	1.92592	0.0661271	0.803995	-4.20296
CDC42EP1	0.111571	0.111571	1.92582	0.0661406	0.803995	-4.20313
HNRNPA1P1	0.134771	0.134771	1.92518	0.0662246	0.804066	-4.20413
HEYL	0.131809	0.131809	1.92471	0.0662865	0.804066	-4.20487
FUNDC2P3	0.120338	0.120338	1.92391	0.0663916	0.804066	-4.20613
PROSER3	0.140019	0.140019	1.92379	0.0664072	0.804066	-4.20631
ANKRD44	0.16611	0.16611	1.92349	0.0664473	0.804066	-4.20679
CERS3-AS1	0.129467	0.129467	1.92277	0.0665412	0.804066	-4.20791
CDC27P1	0.147535	0.147535	1.92271	0.0665496	0.804066	-4.20801
PDLIM4	0.122729	0.122729	1.92219	0.0666177	0.804066	-4.20883
COPS3	0.211645	0.211645	1.92151	0.066708	0.804347	-4.2099
NPAS3	0.143684	0.143684	1.92107	0.0667659	0.804432	-4.21059
FBXL7	0.163666	0.163666	1.91997	0.0669109	0.80473	-4.21231
OR4F7P	0.175433	0.175433	1.91977	0.066938	0.80473	-4.21263
FOXA3	0.114036	0.114036	1.91773	0.0672079	0.805961	-4.21582
COX18	0.229989	0.229989	1.9157	0.067479	0.807565	-4.21901
LRRC46	0.147071	0.147071	1.91543	0.0675143	0.807565	-4.21942
TANK	0.253111	0.253111	1.91533	0.0675288	0.807565	-4.21959
DEFB123	0.125624	0.125624	1.91402	0.0677036	0.807648	-4.22164
TNFRSF10D	0.167535	0.167535	1.91349	0.0677747	0.807648	-4.22247
GALR2	0.145454	0.145454	1.91312	0.0678234	0.807648	-4.22304
ACTBL2	0.165831	0.165831	1.9114	0.0680539	0.80861	-4.22573
HOTAIRM1	0.185297	0.185297	1.91094	0.0681165	0.80861	-4.22646
FBXW5	0.176372	0.176372	1.90986	0.068262	0.80861	-4.22814
EFEMP1	0.331002	0.331002	1.90944	0.0683184	0.80861	-4.2288
GABRP	0.151871	0.151871	1.90908	0.0683676	0.80861	-4.22937
S1PR2	0.164922	0.164922	1.90906	0.0683699	0.80861	-4.2294
NCF1B	0.202687	0.202687	1.90778	0.0685431	0.809763	-4.2314
NEU2	0.134882	0.134882	1.9064	0.0687289	0.810897	-4.23354
KCNQ1OT1	0.159833	0.159833	1.90608	0.0687733	0.810897	-4.23405
KLK15	0.147138	0.147138	1.90594	0.0687918	0.810897	-4.23427
SNORD114-23	0.121329	0.121329	1.90579	0.0688125	0.810897	-4.2345
MTCYBP13	0.142316	0.142316	1.90541	0.0688635	0.810897	-4.23509
NECAP2	0.110416	0.110416	1.90535	0.0688713	0.810897	-4.23518
FRMD5	0.149886	0.149886	1.9052	0.0688916	0.810897	-4.23541
OSBPL3	0.260693	0.260693	1.9051	0.0689063	0.810897	-4.23558
SRD5A1	0.139023	0.139023	1.90335	0.0691434	0.81179	-4.2383
MAP6D1	0.142158	0.142158	1.90309	0.069179	0.81179	-4.23871
RYKP1	0.165915	0.165915	1.90121	0.0694362	0.812104	-4.24164
MCF2L-AS1	0.101284	0.101284	1.90047	0.0695371	0.812104	-4.24279
HOXB3	0.284389	0.284389	1.90039	0.069548	0.812104	-4.24291
TCEAL4	0.187865	0.187865	1.89831	0.0698332	0.813058	-4.24615
EBF4	0.138379	0.138379	1.89768	0.0699207	0.813058	-4.24714
ADGRF5	0.296523	0.296523	1.89765	0.0699238	0.813058	-4.24718
ANKRD33	0.149821	0.149821	1.89698	0.0700167	0.813644	-4.24822
ATP6V1E1	0.224894	0.224894	1.89639	0.0700979	0.813644	-4.24914
PRAM1	0.154641	0.154641	1.89621	0.0701232	0.813644	-4.24943
GPRIN3	0.278358	0.278358	1.89598	0.0701542	0.813658	-4.24978
PLD3	0.167462	0.167462	1.89455	0.0703515	0.814059	-4.252
DNM1	0.205297	0.205297	1.89444	0.0703665	0.814059	-4.25216
LYPD2	0.131306	0.131306	1.89412	0.0704121	0.814059	-4.25268
MATN1	0.142294	0.142294	1.89372	0.0704669	0.814059	-4.25329
OR5W1P	0.119703	0.119703	1.89339	0.0705122	0.814059	-4.2538
SUMO2P4	0.127267	0.127267	1.89295	0.0705742	0.814059	-4.25449
UBA7	0.186549	0.186549	1.89276	0.0705993	0.814059	-4.25477
ST13P16	0.154689	0.154689	1.89233	0.0706599	0.814059	-4.25545
PGBD5	0.160287	0.160287	1.89189	0.0707206	0.814059	-4.25613
ATL3	0.191883	0.191883	1.89186	0.0707255	0.814059	-4.25618
CHPF	0.165907	0.165907	1.8907	0.0708865	0.814657	-4.25798
REXO1L10P	0.15021	0.15021	1.89061	0.0708994	0.814657	-4.25812
DDX39AP1	0.149625	0.149625	1.88956	0.0710452	0.815676	-4.25975
CNN2	0.134529	0.134529	1.88906	0.0711146	0.815702	-4.26052
RPS26P35	0.172349	0.172349	1.88883	0.0711464	0.815702	-4.26087
RAB4B	0.115564	0.115564	1.88793	0.0712732	0.815702	-4.26228
PTPRD-AS2	0.117479	0.117479	1.88731	0.07136	0.815702	-4.26324
TBC1D2	0.163985	0.163985	1.88698	0.0714061	0.815702	-4.26375
NRBF2P2	0.206104	0.206104	1.88657	0.0714627	0.815702	-4.26437
NMD3	0.171808	0.171808	1.88619	0.0715174	0.815702	-4.26498
PSMD8	0.149445	0.149445	1.88612	0.0715268	0.815702	-4.26508
PXN-AS1	0.147873	0.147873	1.88587	0.0715609	0.815702	-4.26546
NRF1	0.156512	0.156512	1.88573	0.0715806	0.815702	-4.26567
AJUBA	0.263983	0.263983	1.88381	0.0718516	0.816691	-4.26866
HS3ST3A1	0.159568	0.159568	1.88342	0.0719063	0.816691	-4.26926
TAGAP	0.109886	0.109886	1.88306	0.0719564	0.816691	-4.26981
PITPNA	0.149188	0.149188	1.88262	0.0720189	0.816691	-4.27049
MTCYBP14	0.122213	0.122213	1.88189	0.0721223	0.816691	-4.27162
IQGAP2	0.211284	0.211284	1.88125	0.072213	0.816691	-4.27262
ATF5	0.155066	0.155066	1.88081	0.0722756	0.816691	-4.2733
INS	0.145789	0.145789	1.88074	0.0722847	0.816691	-4.2734
WFDC10B	0.185367	0.185367	1.88036	0.0723394	0.816691	-4.274
SNAPC2	0.146464	0.146464	1.88018	0.0723643	0.816691	-4.27427
ATP1A3	0.122628	0.122628	1.87979	0.0724195	0.816691	-4.27487
TPBG	0.22844	0.22844	1.87978	0.0724205	0.816691	-4.27488
JADRR	0.137579	0.137579	1.87964	0.0724409	0.816691	-4.2751
PHLDA1	0.196153	0.196153	1.87963	0.0724429	0.816691	-4.27512
GOLGA2	0.123411	0.123411	1.879	0.0725318	0.816691	-4.27609
TRGV3	0.14952	0.14952	1.87872	0.0725723	0.816722	-4.27653
GULP1	0.372129	0.372129	1.87821	0.0726439	0.816855	-4.27731
PRB2	0.132136	0.132136	1.87732	0.0727712	0.817838	-4.27869
DDX5	0.191412	0.191412	1.87718	0.0727912	0.817838	-4.27891
RPL21P54	0.15587	0.15587	1.8762	0.0729302	0.81861	-4.28041
ASH1L-IT1	0.12846	0.12846	1.87601	0.0729573	0.81861	-4.2807
CCL5	0.270158	0.270158	1.87537	0.0730496	0.81861	-4.2817
GLRX	0.209556	0.209556	1.87531	0.073058	0.81861	-4.28179
HLA-H	0.256245	0.256245	1.87407	0.0732351	0.819117	-4.2837
HIF1AP1	0.164474	0.164474	1.87271	0.0734301	0.820625	-4.28579
AQP5	0.122917	0.122917	1.87181	0.0735589	0.821057	-4.28718
PSMD14	0.170762	0.170762	1.87043	0.0737582	0.82141	-4.28931
LIMCH1	0.21437	0.21437	1.86995	0.0738279	0.82141	-4.29005
AGTRAP	0.163618	0.163618	1.8699	0.0738352	0.82141	-4.29013
HLA-S	0.145692	0.145692	1.86963	0.0738737	0.82141	-4.29054
SPAG11A	0.106211	0.106211	1.86957	0.0738829	0.82141	-4.29064
C10orf71-AS1	0.141156	0.141156	1.86899	0.0739659	0.821452	-4.29152
F2R	0.112441	0.112441	1.86853	0.0740329	0.821452	-4.29223
XGY1	0.141011	0.141011	1.86809	0.0740957	0.821452	-4.2929
CLCN4	0.170425	0.170425	1.86794	0.0741174	0.821452	-4.29313
NR2C2AP	0.142918	0.142918	1.86741	0.0741946	0.82177	-4.29395
DHX9P1	0.123988	0.123988	1.86706	0.0742453	0.821897	-4.29449
RFTN1	0.260743	0.260743	1.86646	0.0743322	0.821897	-4.29541
PREX1	0.311424	0.311424	1.86589	0.0744155	0.821897	-4.29629
ANXA6	0.193686	0.193686	1.86588	0.0744169	0.821897	-4.29631
MRC1	0.24006	0.24006	1.86508	0.0745333	0.822185	-4.29754
CADPS	0.438074	0.438074	1.86278	0.0748686	0.824884	-4.30107
ADAMTSL4	0.147992	0.147992	1.86165	0.0750337	0.826021	-4.30281
PRIMPOL	0.259194	0.259194	1.86042	0.0752139	0.826021	-4.30469
TMEM9B-AS1	0.157595	0.157595	1.85959	0.0753345	0.826349	-4.30595
FBP2	0.172268	0.172268	1.85885	0.0754433	0.826576	-4.30709
HMGN2P11	0.132752	0.132752	1.85878	0.0754537	0.826576	-4.3072
CEP170P1	0.154606	0.154606	1.85809	0.0755557	0.826576	-4.30826
OGFR-AS1	0.129958	0.129958	1.85795	0.0755758	0.826576	-4.30847
VEGFB	0.158117	0.158117	1.85763	0.0756229	0.826576	-4.30896
C17orf99	0.191093	0.191093	1.8576	0.0756277	0.826576	-4.30901
ZNF341-AS1	0.128954	0.128954	1.85714	0.0756957	0.826718	-4.30972
FGF19	0.151209	0.151209	1.85591	0.0758769	0.827158	-4.3116
ERG	0.157898	0.157898	1.85584	0.0758876	0.827158	-4.31171
PRR23C	0.136921	0.136921	1.85579	0.0758946	0.827158	-4.31178
MFSD12	0.140679	0.140679	1.85453	0.0760818	0.827158	-4.31372
WWC2-AS2	0.15272	0.15272	1.85451	0.0760844	0.827158	-4.31374
ATCAY	0.14983	0.14983	1.85442	0.076098	0.827158	-4.31388
SEC14L1	0.17714	0.17714	1.85441	0.0760985	0.827158	-4.31389
TBCEL	0.170693	0.170693	1.85435	0.0761081	0.827158	-4.31399
ACTG1P16	0.124267	0.124267	1.85431	0.076114	0.827158	-4.31405
COPS8P2	0.194625	0.194625	1.85411	0.076144	0.827158	-4.31436
FHL2	0.230235	0.230235	1.85278	0.0763406	0.827689	-4.31639
WWTR1	0.201412	0.201412	1.85278	0.0763411	0.827689	-4.31639
MORF4	0.140486	0.140486	1.85236	0.076403	0.827704	-4.31703
FPR3	0.336318	0.336318	1.85219	0.0764289	0.827704	-4.3173
FRMD7	0.136697	0.136697	1.85199	0.0764585	0.827704	-4.3176
ZNF407	0.153906	0.153906	1.85176	0.0764921	0.82774	-4.31794
DHRS4L2	0.120725	0.120725	1.84984	0.0767785	0.829527	-4.32088
FBXO8	0.171167	0.171167	1.84854	0.0769722	0.829527	-4.32286
RNF149	0.257914	0.257914	1.84768	0.0771009	0.829527	-4.32417
ZNF605	0.184526	0.184526	1.8476	0.0771142	0.829527	-4.32431
KIAA0040	0.217909	0.217909	1.84754	0.0771228	0.829527	-4.3244
SS18	0.265703	0.265703	1.84661	0.0772616	0.829527	-4.32581
SNORD114-28	0.159843	0.159843	1.84642	0.0772902	0.829527	-4.3261
ACTB	0.136994	0.136994	1.846	0.077353	0.829527	-4.32674
SPINK6	0.151027	0.151027	1.84556	0.0774192	0.829527	-4.32741
FOXD4L1	0.127679	0.127679	1.84533	0.0774545	0.829527	-4.32777
MFNG	0.218673	0.218673	1.84496	0.0775095	0.829527	-4.32832
TCEAL8	0.17509	0.17509	1.84479	0.077536	0.829527	-4.32859
PML	0.131249	0.131249	1.84451	0.0775773	0.829527	-4.32901
IDSP1	0.133693	0.133693	1.84426	0.0776146	0.829527	-4.32939
ROBO2	0.149905	0.149905	1.84363	0.0777107	0.829527	-4.33036
SLC25A39P2	0.135142	0.135142	1.8435	0.0777298	0.829527	-4.33055
PLA2G7	0.293126	0.293126	1.84293	0.0778152	0.829527	-4.33141
CIITA	0.132453	0.132453	1.84256	0.0778723	0.829527	-4.33199
CLN6	0.119482	0.119482	1.84211	0.0779398	0.829527	-4.33267
AQP9	0.379345	0.379345	1.84206	0.0779474	0.829527	-4.33275
OR5G4P	0.146901	0.146901	1.84022	0.0782264	0.829527	-4.33555
CREM	0.21195	0.21195	1.84011	0.0782432	0.829527	-4.33572
MIAT	0.135405	0.135405	1.83999	0.0782612	0.829527	-4.3359
GUCY1A2	0.191892	0.191892	1.83967	0.0783098	0.829527	-4.33639
XGY2	0.364268	0.364268	1.8396	0.0783206	0.829527	-4.33649
GRP	0.205976	0.205976	1.83933	0.0783611	0.829527	-4.3369
STK10	0.293832	0.293832	1.83864	0.0784666	0.829527	-4.33796
PTPRN2	0.14519	0.14519	1.83862	0.0784694	0.829527	-4.33798
SUMO2P6	0.148212	0.148212	1.83861	0.0784701	0.829527	-4.33799
OR7E125P	0.114984	0.114984	1.83803	0.078559	0.829527	-4.33888
OR6R2P	0.162286	0.162286	1.83773	0.078604	0.829527	-4.33933
COPG1	0.176684	0.176684	1.83633	0.0788187	0.829527	-4.34147
SPATA24	0.146379	0.146379	1.83608	0.0788564	0.829527	-4.34184
NID1	0.170932	0.170932	1.83602	0.0788647	0.829527	-4.34193
KDR	0.176483	0.176483	1.83587	0.0788887	0.829527	-4.34216
MGAT1	0.145605	0.145605	1.83556	0.078936	0.829527	-4.34263
HMGN2P19	0.137292	0.137292	1.83524	0.0789852	0.829652	-4.34312
ABI2	0.192437	0.192437	1.8349	0.0790364	0.829652	-4.34363
SETP20	0.104259	0.104259	1.83481	0.0790508	0.829652	-4.34377
OIP5-AS1	0.135029	0.135029	1.83339	0.0792686	0.830842	-4.34593
GJA10	0.136651	0.136651	1.83326	0.0792872	0.830842	-4.34611
MTND4P4	0.125642	0.125642	1.83283	0.0793546	0.830842	-4.34678
ACTBP9	0.117374	0.117374	1.83275	0.0793655	0.830842	-4.34689
CENPU	0.17843	0.17843	1.83222	0.0794483	0.831072	-4.34771
CNTN4	0.174852	0.174852	1.83198	0.0794844	0.831131	-4.34806
GCH1	0.131877	0.131877	1.83149	0.0795598	0.831601	-4.34881
PHC2	0.167344	0.167344	1.83094	0.0796441	0.831896	-4.34963
DOCK10	0.224459	0.224459	1.83091	0.079649	0.831896	-4.34968
RPS6KA2	0.142753	0.142753	1.83041	0.0797262	0.832066	-4.35044
SDR16C5	0.236805	0.236805	1.82978	0.0798235	0.83246	-4.3514
RARRES1	0.406539	0.406539	1.82955	0.0798597	0.832505	-4.35175
IRGC	0.10466	0.10466	1.82813	0.0800779	0.833015	-4.35389
RAPGEF1	0.126076	0.126076	1.82797	0.0801032	0.833015	-4.35414
ATP2A3	0.181364	0.181364	1.82785	0.0801223	0.833015	-4.35432
CAP2	0.162483	0.162483	1.82743	0.0801871	0.833146	-4.35496
FAM90A28P	0.113429	0.113429	1.82706	0.0802451	0.833146	-4.35552
AMZ2P1	0.167326	0.167326	1.82704	0.0802477	0.833146	-4.35555
SLC27A3	0.21455	0.21455	1.82698	0.0802569	0.833146	-4.35564
ZG16B	0.100677	0.100677	1.82498	0.0805668	0.834459	-4.35866
NLRP12	0.131665	0.131665	1.82459	0.0806283	0.834558	-4.35926
KRTAP2-5P	0.136351	0.136351	1.82453	0.0806374	0.834558	-4.35934
SMIM20	0.123822	0.123822	1.82419	0.0806908	0.834576	-4.35986
PCAT6	0.158304	0.158304	1.82413	0.0807003	0.834576	-4.35995
SPRED1	0.109418	0.109418	1.8234	0.080813	0.834907	-4.36105
C11orf45	0.102925	0.102925	1.82333	0.0808241	0.834907	-4.36115
ACR	0.169028	0.169028	1.82177	0.0810682	0.836112	-4.36351
PKMP2	0.15599	0.15599	1.82135	0.0811347	0.836112	-4.36416
MBOAT7	0.144033	0.144033	1.82112	0.0811695	0.836112	-4.36449
MCC	0.174009	0.174009	1.82078	0.0812235	0.836185	-4.36501
ACP1	0.206582	0.206582	1.81965	0.0813999	0.836739	-4.36671
CSF2RB	0.103425	0.103425	1.81908	0.0814908	0.837044	-4.36758
NOP14-AS1	0.133449	0.133449	1.81786	0.0816826	0.838164	-4.36942
OR7E157P	0.120654	0.120654	1.81713	0.0817964	0.838164	-4.37051
OR4F13P	0.127551	0.127551	1.81713	0.0817966	0.838164	-4.37051
VAPA	0.210932	0.210932	1.81703	0.0818127	0.838164	-4.37067
KLHL10	0.141329	0.141329	1.81659	0.0818829	0.838164	-4.37134
FHL3	0.139274	0.139274	1.81634	0.0819211	0.838164	-4.3717
NF1P8	0.0971493	0.0971493	1.81594	0.0819851	0.838164	-4.37231
PLPPR1	0.227094	0.227094	1.81593	0.0819868	0.838164	-4.37233
GPX1	0.196199	0.196199	1.81585	0.081999	0.838164	-4.37245
MMP14	0.189666	0.189666	1.81529	0.0820882	0.838448	-4.3733
EMC10	0.115045	0.115045	1.81457	0.0822009	0.838706	-4.37437
UBQLN2	0.11477	0.11477	1.81419	0.0822618	0.838706	-4.37495
PLSCR3	0.140504	0.140504	1.8141	0.0822759	0.838706	-4.37508
SCGB3A1	0.105263	0.105263	1.81388	0.0823105	0.838706	-4.37541
RPS15AP16	0.156014	0.156014	1.81348	0.0823741	0.838706	-4.37602
AQP4-AS1	0.12735	0.12735	1.81299	0.0824521	0.838706	-4.37676
ASMTL-AS1	0.116592	0.116592	1.81285	0.0824736	0.838706	-4.37696
STXBP1	0.248667	0.248667	1.81277	0.0824873	0.838706	-4.37709
CHRNB4	0.152969	0.152969	1.81225	0.0825701	0.838706	-4.37787
RHBDD3	0.136134	0.136134	1.81223	0.0825729	0.838706	-4.3779
SCN3B	0.172385	0.172385	1.81214	0.0825867	0.838706	-4.37803
STRA6	0.168629	0.168629	1.81152	0.0826858	0.838706	-4.37897
DCTN6	0.183023	0.183023	1.81108	0.0827552	0.838706	-4.37962
DKK4	0.127352	0.127352	1.81104	0.0827625	0.838706	-4.37969
FLNC	0.179843	0.179843	1.81067	0.0828209	0.838706	-4.38024
VCL	0.2441	0.2441	1.81064	0.0828252	0.838706	-4.38028
COA7	0.127226	0.127226	1.81062	0.0828283	0.838706	-4.38031
BORCS6	0.143418	0.143418	1.81048	0.0828507	0.838706	-4.38052
IFITM2	0.226928	0.226928	1.80908	0.0830745	0.840442	-4.38263
APP	0.156197	0.156197	1.80901	0.0830862	0.840442	-4.38274
FAM216A	0.143143	0.143143	1.80766	0.0833021	0.840935	-4.38477
DHFRP2	0.132339	0.132339	1.80634	0.0835142	0.840935	-4.38676
VIM-AS1	0.143802	0.143802	1.80627	0.0835255	0.840935	-4.38686
HOXB-AS3	0.311113	0.311113	1.80604	0.0835615	0.840935	-4.3872
CSF3R	0.160231	0.160231	1.80602	0.0835653	0.840935	-4.38723
ADGRB1	0.100164	0.100164	1.8058	0.0836004	0.840935	-4.38756
INPP5A	0.18594	0.18594	1.80427	0.0838465	0.841735	-4.38986
PELI2	0.15493	0.15493	1.80426	0.0838482	0.841735	-4.38987
BRD1	0.131589	0.131589	1.80365	0.0839458	0.841735	-4.39078
KCNJ8	0.107116	0.107116	1.80335	0.0839945	0.841735	-4.39123
MYO15B	0.154732	0.154732	1.80295	0.0840584	0.841735	-4.39183
PRTG	0.139808	0.139808	1.80282	0.0840804	0.841735	-4.39203
THBD	0.152607	0.152607	1.80238	0.0841511	0.841735	-4.39269
BNIP2	0.125193	0.125193	1.80232	0.0841608	0.841735	-4.39278
WHAMMP1	0.179173	0.179173	1.80213	0.084192	0.841735	-4.39307
TRIM72	0.151267	0.151267	1.80209	0.0841982	0.841735	-4.39312
PDIA3P2	0.131898	0.131898	1.80113	0.0843537	0.841989	-4.39456
HTRA3	0.150204	0.150204	1.80062	0.0844365	0.841989	-4.39533
GRIK3	0.131119	0.131119	1.79996	0.0845422	0.841989	-4.39631
WBP1LP4	0.143261	0.143261	1.79985	0.0845607	0.841989	-4.39648
DDX24	0.119696	0.119696	1.79978	0.0845719	0.841989	-4.39658
ACTR5	0.151993	0.151993	1.79925	0.0846588	0.841989	-4.39738
LCE1C	0.111585	0.111585	1.7989	0.0847154	0.841989	-4.3979
LSM1P1	0.114863	0.114863	1.7988	0.0847308	0.841989	-4.39804
TGM7	0.132175	0.132175	1.79857	0.0847685	0.841989	-4.39839
GNAT2	0.153747	0.153747	1.79851	0.0847787	0.841989	-4.39849
FGF12-AS1	0.112854	0.112854	1.79803	0.084857	0.842104	-4.39921
WDR27	0.135394	0.135394	1.7979	0.0848772	0.842104	-4.39939
GAPLINC	0.145818	0.145818	1.7965	0.0851063	0.842979	-4.40149
RPLP0P11	0.129775	0.129775	1.79641	0.0851211	0.842979	-4.40163
RPSAP5	0.127722	0.127722	1.79598	0.08519	0.842979	-4.40226
FRMD4B	0.123942	0.123942	1.79566	0.0852426	0.842979	-4.40274
UNC5A	0.104037	0.104037	1.79518	0.0853211	0.842979	-4.40346
PTPN5	0.123674	0.123674	1.79501	0.0853499	0.842979	-4.40372
PKMP1	0.216498	0.216498	1.79445	0.0854408	0.842979	-4.40455
OSCP1	0.157319	0.157319	1.79428	0.0854694	0.842979	-4.40481
CXCR3	0.118041	0.118041	1.79355	0.0855882	0.842979	-4.4059
FZD4	0.134238	0.134238	1.79337	0.0856173	0.842979	-4.40616
OR7E83P	0.123542	0.123542	1.79329	0.0856308	0.842979	-4.40628
TRAPPC6B	0.141388	0.141388	1.79236	0.0857828	0.842979	-4.40767
SLC9B1P4	0.115191	0.115191	1.79228	0.0857961	0.842979	-4.40779
DNM1P50	0.14103	0.14103	1.7922	0.0858106	0.842979	-4.40792
SNAPC4	0.136456	0.136456	1.79149	0.0859268	0.842979	-4.40897
TPM4P1	0.116123	0.116123	1.79106	0.085998	0.842979	-4.40962
PDE11A	0.15074	0.15074	1.79076	0.0860468	0.842979	-4.41006
PIGO	0.113542	0.113542	1.79069	0.0860575	0.842979	-4.41016
LCE2D	0.117244	0.117244	1.79017	0.0861443	0.842979	-4.41094
ZNF491	0.114882	0.114882	1.78934	0.0862808	0.843019	-4.41218
MECR	0.157723	0.157723	1.7893	0.086287	0.843019	-4.41223
TMEM11	0.124232	0.124232	1.78898	0.0863407	0.843019	-4.41272
MAFA-AS1	0.102858	0.102858	1.78893	0.0863489	0.843019	-4.41279
FBXO32	0.258238	0.258238	1.78883	0.0863645	0.843019	-4.41293
PLEKHO2	0.17883	0.17883	1.78857	0.0864084	0.843146	-4.41333
ABHD11	0.137338	0.137338	1.78819	0.0864701	0.843446	-4.41389
RHOB	0.140923	0.140923	1.78764	0.0865617	0.843737	-4.41471
PIN1	0.133992	0.133992	1.78711	0.0866502	0.843987	-4.41551
FAM174A	0.148681	0.148681	1.78687	0.0866893	0.843987	-4.41586
RNF144B	0.187318	0.187318	1.78671	0.0867151	0.843987	-4.41609
TMEM86A	0.141264	0.141264	1.78661	0.0867323	0.843987	-4.41624
DEFB1	0.130083	0.130083	1.78655	0.0867419	0.843987	-4.41633
MAP2K1	0.122985	0.122985	1.78487	0.0870207	0.844593	-4.41883
SGMS2	0.291325	0.291325	1.78352	0.0872464	0.844615	-4.42085
HOXB5	0.18333	0.18333	1.78336	0.0872723	0.844615	-4.42108
PABPC1P12	0.113231	0.113231	1.78331	0.0872806	0.844615	-4.42115
TUBG1	0.104096	0.104096	1.78317	0.0873048	0.844615	-4.42137
PRKG1	0.214296	0.214296	1.78315	0.0873076	0.844615	-4.42139
PLAU	0.149627	0.149627	1.78298	0.0873361	0.844615	-4.42165
TNFRSF10C	0.165554	0.165554	1.78241	0.0874318	0.844615	-4.4225
AMDHD1	0.144708	0.144708	1.78201	0.0874979	0.844615	-4.42309
ITGA11	0.174201	0.174201	1.78194	0.0875099	0.844615	-4.42319
CNN2P12	0.105784	0.105784	1.7808	0.0877009	0.845484	-4.42489
PTPN12	0.235164	0.235164	1.78001	0.0878323	0.84598	-4.42605
ANO6	0.181127	0.181127	1.77985	0.0878598	0.84598	-4.4263
MRPS11	0.134868	0.134868	1.7798	0.0878674	0.84598	-4.42636
CCT6B	0.116854	0.116854	1.77882	0.0880329	0.846277	-4.42783
PCM1	0.199962	0.199962	1.77875	0.0880439	0.846277	-4.42793
CSGALNACT2	0.263827	0.263827	1.77781	0.0882013	0.847316	-4.42932
SCGB2A2	0.11509	0.11509	1.77749	0.0882553	0.847536	-4.42979
TNFRSF18	0.121611	0.121611	1.77712	0.0883179	0.847707	-4.43034
PTPRC	0.333571	0.333571	1.77702	0.0883351	0.847707	-4.43049
ZNF667-AS1	0.130309	0.130309	1.77676	0.0883795	0.847723	-4.43088
MSMO1	0.228648	0.228648	1.77517	0.0886469	0.847723	-4.43323
PIGK	0.167136	0.167136	1.77516	0.0886488	0.847723	-4.43325
WHAMMP3	0.221048	0.221048	1.77349	0.0889319	0.847723	-4.43573
RASD1	0.100539	0.100539	1.77346	0.0889361	0.847723	-4.43577
NTF3	0.146899	0.146899	1.7734	0.0889463	0.847723	-4.43586
PPP1R8	0.156916	0.156916	1.77334	0.0889565	0.847723	-4.43594
SLC35D3	0.121428	0.121428	1.77312	0.0889937	0.847723	-4.43627
TSPAN16	0.162496	0.162496	1.77286	0.0890387	0.847723	-4.43666
ST6GALNAC2	0.137909	0.137909	1.77241	0.0891146	0.847723	-4.43732
ACTG1P2	0.145649	0.145649	1.7724	0.0891156	0.847723	-4.43733
PSIP1	0.12677	0.12677	1.7718	0.0892187	0.847723	-4.43823
ABCB10P4	0.161101	0.161101	1.7715	0.0892686	0.847723	-4.43867
GNAI1	0.265003	0.265003	1.77139	0.0892875	0.847723	-4.43883
PLOD1	0.103958	0.103958	1.77063	0.0894164	0.847723	-4.43995
PTENP1	0.125429	0.125429	1.7706	0.0894216	0.847723	-4.44
ELOVL2	0.127779	0.127779	1.77025	0.0894824	0.847723	-4.44052
SHISA4	0.151108	0.151108	1.76999	0.0895266	0.847723	-4.44091
DPYSL2	0.228402	0.228402	1.76929	0.0896462	0.847723	-4.44195
SLC22A13	0.120297	0.120297	1.76852	0.089777	0.847723	-4.44308
MRPL17	0.110617	0.110617	1.76845	0.0897887	0.847723	-4.44318
GOLGA8J	0.138533	0.138533	1.76782	0.0898962	0.847723	-4.44411
SPON2	0.120975	0.120975	1.76777	0.0899046	0.847723	-4.44418
NINJ1	0.153388	0.153388	1.76721	0.0900008	0.847723	-4.44501
LY6D	0.108247	0.108247	1.76688	0.090058	0.847723	-4.44551
BCL2L2	0.117391	0.117391	1.76676	0.0900781	0.847723	-4.44568
SRP9	0.17453	0.17453	1.76674	0.0900814	0.847723	-4.44571
ARAFP3	0.162002	0.162002	1.76615	0.0901825	0.847723	-4.44658
KLHL42	0.132955	0.132955	1.76587	0.0902309	0.847723	-4.44699
NLGN1	0.12991	0.12991	1.76577	0.0902471	0.847723	-4.44713
SYT14	0.113786	0.113786	1.76557	0.0902815	0.847723	-4.44743
SVEP1	0.158678	0.158678	1.76553	0.0902881	0.847723	-4.44749
SOCS4	0.130493	0.130493	1.76471	0.0904295	0.847723	-4.4487
SEC24B	0.167478	0.167478	1.76443	0.0904781	0.847723	-4.44912
HCG4B	0.158471	0.158471	1.76411	0.0905319	0.847723	-4.44958
HCP5	0.121135	0.121135	1.76393	0.0905643	0.847723	-4.44986
ST8SIA1	0.170567	0.170567	1.76336	0.0906617	0.847723	-4.45069
TRAV8-3	0.143217	0.143217	1.7632	0.0906898	0.847723	-4.45093
FAM210B	0.116474	0.116474	1.76316	0.0906955	0.847723	-4.45098
ITGA2	0.241061	0.241061	1.76202	0.0908926	0.847723	-4.45267
RPLP2P1	0.111529	0.111529	1.76126	0.0910238	0.847723	-4.45379
GRIA3	0.369704	0.369704	1.76111	0.0910507	0.847723	-4.45401
FICD	0.168553	0.168553	1.76107	0.0910562	0.847723	-4.45406
LILRA2	0.15383	0.15383	1.75942	0.0913423	0.847723	-4.4565
RPL36AP21	0.101492	0.101492	1.75939	0.0913483	0.847723	-4.45655
MT2A	0.273495	0.273495	1.7593	0.0913628	0.847723	-4.45667
SETP14	0.149086	0.149086	1.75911	0.0913955	0.847723	-4.45695
HECTD2	0.218367	0.218367	1.75808	0.0915753	0.847723	-4.45847
KNCN	0.108018	0.108018	1.75765	0.0916493	0.847723	-4.4591
COL14A1	0.288654	0.288654	1.75707	0.0917501	0.847723	-4.45995
BOD1P1	0.122681	0.122681	1.75653	0.0918445	0.847723	-4.46075
CHIC1	0.154624	0.154624	1.75612	0.0919157	0.847723	-4.46135
RALGPS1	0.142815	0.142815	1.75612	0.0919158	0.847723	-4.46135
TRAF7	0.139807	0.139807	1.75578	0.0919752	0.847723	-4.46185
EMC7	0.117307	0.117307	1.75468	0.0921671	0.847723	-4.46347
AP3M2	0.153908	0.153908	1.75396	0.0922924	0.847723	-4.46452
EIF4A1P10	0.119623	0.119623	1.75337	0.092397	0.847723	-4.4654
TNFRSF25	0.116358	0.116358	1.75329	0.0924103	0.847723	-4.46551
ONECUT2	0.15654	0.15654	1.75322	0.0924226	0.847723	-4.46561
CRYBB2P1	0.170653	0.170653	1.75296	0.0924677	0.847723	-4.46599
PDPN	0.210612	0.210612	1.7528	0.0924967	0.847723	-4.46623
KPNA6	0.187706	0.187706	1.7528	0.092497	0.847723	-4.46623
FBXO16	0.166929	0.166929	1.75251	0.0925474	0.847723	-4.46666
HMGN2P15	0.104301	0.104301	1.75215	0.0926093	0.847723	-4.46717
TNS3	0.202462	0.202462	1.75214	0.0926117	0.847723	-4.46719
ADAMTS12	0.148987	0.148987	1.75211	0.092617	0.847723	-4.46724
CALR	0.198566	0.198566	1.75196	0.0926428	0.847723	-4.46746
MTUS1	0.162816	0.162816	1.75165	0.0926973	0.847723	-4.46791
PDCD1LG2	0.229876	0.229876	1.75163	0.0927015	0.847723	-4.46795
SNORD115-7	0.106168	0.106168	1.7516	0.0927072	0.847723	-4.46799
SLCO2B1	0.223749	0.223749	1.75145	0.0927335	0.847723	-4.46821
MYBPH	0.133689	0.133689	1.75096	0.0928187	0.847723	-4.46892
GOLT1B	0.184179	0.184179	1.75092	0.0928261	0.847723	-4.46899
HNRNPRP1	0.13376	0.13376	1.75085	0.092839	0.847723	-4.46909
CLDND1	0.155749	0.155749	1.75029	0.0929368	0.847941	-4.46991
TANGO2	0.123053	0.123053	1.75015	0.0929618	0.847941	-4.47012
SEMA7A	0.164358	0.164358	1.74966	0.0930479	0.84818	-4.47083
EBNA1BP2	0.195677	0.195677	1.7495	0.0930755	0.84818	-4.47106
FAM90A3P	0.139737	0.139737	1.74895	0.0931732	0.848215	-4.47188
ADAM9	0.216937	0.216937	1.74875	0.0932076	0.848215	-4.47216
SAMM50	0.179107	0.179107	1.74847	0.093258	0.848215	-4.47258
B4GALT7	0.11744	0.11744	1.74773	0.0933888	0.848215	-4.47367
HSPB8	0.16469	0.16469	1.74739	0.0934474	0.848215	-4.47415
IL25	0.112375	0.112375	1.74727	0.0934695	0.848215	-4.47434
IFFO1	0.13161	0.13161	1.74719	0.0934833	0.848215	-4.47445
CEMIP	0.170168	0.170168	1.74642	0.0936194	0.848327	-4.47558
TDRG1	0.158908	0.158908	1.74586	0.0937187	0.848327	-4.4764
FGF16	0.144123	0.144123	1.74544	0.0937941	0.848327	-4.47702
IGFL1P1	0.224331	0.224331	1.74479	0.0939091	0.848327	-4.47797
TCEAL7	0.102748	0.102748	1.74419	0.0940156	0.848327	-4.47885
GABARAP	0.193262	0.193262	1.74405	0.0940402	0.848327	-4.47905
ZEB2	0.159308	0.159308	1.74382	0.0940812	0.848327	-4.47939
MED12	0.250669	0.250669	1.7434	0.0941564	0.848327	-4.48
TTTY14	0.146934	0.146934	1.74322	0.0941876	0.848327	-4.48026
NSUN3	0.201233	0.201233	1.74224	0.0943615	0.848327	-4.48169
TAT	0.140315	0.140315	1.74223	0.0943632	0.848327	-4.4817
CCDC106	0.118048	0.118048	1.74175	0.0944495	0.848327	-4.48241
COX6CP8	0.145282	0.145282	1.74143	0.0945071	0.848327	-4.48288
RTCB	0.14726	0.14726	1.74071	0.0946356	0.848327	-4.48393
MAP1S	0.128633	0.128633	1.74067	0.0946423	0.848327	-4.48399
HNRNPA3P4	0.119882	0.119882	1.7404	0.0946902	0.848327	-4.48438
MED1	0.120666	0.120666	1.74027	0.0947145	0.848327	-4.48457
EVL	0.233623	0.233623	1.73982	0.0947943	0.848327	-4.48523
PPP2R3B	0.152783	0.152783	1.73968	0.0948188	0.848327	-4.48543
NBPF14	0.127715	0.127715	1.73942	0.0948661	0.848327	-4.48581
ROM1	0.106203	0.106203	1.73871	0.0949932	0.848327	-4.48685
NTNG2	0.12845	0.12845	1.7387	0.0949953	0.848327	-4.48686
MTX1	0.115419	0.115419	1.73858	0.0950162	0.848327	-4.48703
RPEP2	0.140157	0.140157	1.73849	0.0950319	0.848327	-4.48716
ZNF449	0.128642	0.128642	1.73785	0.0951478	0.848327	-4.4881
TENM4	0.146748	0.146748	1.73773	0.0951689	0.848327	-4.48828
AVPR1A	0.1457	0.1457	1.73745	0.0952193	0.848327	-4.48869
EFHC1	0.163747	0.163747	1.73719	0.0952651	0.848327	-4.48906
ASTN2-AS1	0.118217	0.118217	1.73714	0.0952754	0.848327	-4.48914
BUD31P2	0.136582	0.136582	1.73649	0.0953917	0.848327	-4.49008
ATP6V1G1P3	0.112756	0.112756	1.73627	0.0954322	0.848327	-4.49041
BHLHA15	0.123586	0.123586	1.73599	0.0954819	0.848327	-4.49081
ASB4	0.206721	0.206721	1.73507	0.0956466	0.848327	-4.49215
ARHGAP9	0.186783	0.186783	1.73473	0.0957093	0.848327	-4.49265
RPA2P1	0.124352	0.124352	1.73441	0.0957661	0.848327	-4.49311
HDX	0.162167	0.162167	1.73399	0.0958423	0.848327	-4.49373
DOK7	0.103087	0.103087	1.73391	0.0958564	0.848327	-4.49384
INPP5E	0.121426	0.121426	1.73385	0.0958677	0.848327	-4.49393
TMEM199	0.127986	0.127986	1.73379	0.0958779	0.848327	-4.49401
SLC26A11	0.115453	0.115453	1.73356	0.0959205	0.848327	-4.49436
AQP2	0.14686	0.14686	1.73295	0.0960299	0.848327	-4.49524
ZC3H6	0.124994	0.124994	1.73283	0.0960519	0.848327	-4.49541
ZFAT-AS1	0.116006	0.116006	1.73272	0.0960711	0.848327	-4.49557
ADGRF5P2	0.194756	0.194756	1.73179	0.0962407	0.848327	-4.49693
SLC25A5P1	0.115475	0.115475	1.73169	0.0962578	0.848327	-4.49707
RUSC2	0.157492	0.157492	1.73137	0.0963165	0.848327	-4.49754
SRBD1	0.121195	0.121195	1.73086	0.0964084	0.848327	-4.49827
ZNF710	0.148713	0.148713	1.73083	0.0964138	0.848327	-4.49832
CTAGE13P	0.128778	0.128778	1.73071	0.0964361	0.848327	-4.4985
MTHFD2P3	0.114139	0.114139	1.73023	0.0965239	0.848327	-4.4992
GP1BA	0.117423	0.117423	1.73011	0.0965447	0.848327	-4.49937
CIDEB	0.107254	0.107254	1.72999	0.0965662	0.848327	-4.49954
KLHL14	0.109645	0.109645	1.72998	0.0965688	0.848327	-4.49956
GAB4	0.10821	0.10821	1.72989	0.0965852	0.848327	-4.49969
USP32	0.157158	0.157158	1.72986	0.0965903	0.848327	-4.49973
GJC1	0.144577	0.144577	1.72952	0.0966523	0.848327	-4.50023
OR7E53P	0.122009	0.122009	1.72928	0.096696	0.848327	-4.50058
CRISPLD2	0.140914	0.140914	1.72791	0.0969464	0.848962	-4.50257
FBXW4	0.13073	0.13073	1.72774	0.0969774	0.848962	-4.50282
BNIP3P8	0.166368	0.166368	1.72755	0.0970121	0.848962	-4.50309
NR1H2	0.140382	0.140382	1.72709	0.0970947	0.849171	-4.50375
FCMR	0.246097	0.246097	1.72688	0.0971343	0.849171	-4.50407
P3H4	0.172273	0.172273	1.72649	0.0972054	0.849501	-4.50463
UBE2N	0.120671	0.120671	1.72587	0.0973178	0.849501	-4.50552
LHB	0.0883368	0.0883368	1.7255	0.0973856	0.849501	-4.50606
LGALS4	0.1846	0.1846	1.72536	0.097412	0.849501	-4.50627
TIMM23B	0.144829	0.144829	1.72512	0.0974552	0.849501	-4.50661
ATP2B4	0.188716	0.188716	1.7249	0.0974965	0.849501	-4.50694
FDCSP	0.476131	0.476131	1.72466	0.0975398	0.849501	-4.50728
ARHGEF10L	0.11512	0.11512	1.72463	0.0975451	0.849501	-4.50732
PCNPP5	0.109037	0.109037	1.72431	0.097605	0.849501	-4.5078
BCL2L2-PABPN1	0.118997	0.118997	1.72385	0.0976891	0.849501	-4.50846
ZNF816-ZNF321P	0.151523	0.151523	1.72348	0.0977568	0.849501	-4.50899
ZNF248	0.163481	0.163481	1.72332	0.0977852	0.849501	-4.50922
ATF4P1	0.110985	0.110985	1.72255	0.0979272	0.849574	-4.51034
FGF1	0.118836	0.118836	1.72158	0.0981058	0.849982	-4.51174
EXOSC3	0.139864	0.139864	1.7212	0.0981754	0.849982	-4.51229
OPA1-AS1	0.153551	0.153551	1.72119	0.0981776	0.849982	-4.51231
SYNPO	0.130181	0.130181	1.72092	0.0982281	0.849982	-4.5127
SCAND2P	0.103364	0.103364	1.72019	0.0983617	0.849982	-4.51375
TRIP4	0.124124	0.124124	1.72009	0.0983812	0.849982	-4.51391
RPS6KA2-IT1	0.136975	0.136975	1.71989	0.0984184	0.849982	-4.5142
BPIFA1	0.152106	0.152106	1.71968	0.0984561	0.849982	-4.51449
SCAMP1	0.155596	0.155596	1.71946	0.0984977	0.849982	-4.51482
FBXO36	0.134281	0.134281	1.71792	0.0987821	0.850248	-4.51704
ZFAND5	0.18551	0.18551	1.71754	0.0988519	0.850248	-4.51758
KRTAP5-2	0.150193	0.150193	1.71671	0.0990071	0.850283	-4.51879
UNC93B4	0.1285	0.1285	1.71647	0.0990508	0.850283	-4.51913
CASP8	0.202421	0.202421	1.71638	0.0990678	0.850283	-4.51927
NRG2	0.100048	0.100048	1.71574	0.0991867	0.850755	-4.52019
VANGL2	0.123366	0.123366	1.71497	0.0993294	0.850755	-4.5213
NKX1-1	0.129951	0.129951	1.71479	0.0993639	0.850755	-4.52156
CD84	0.259033	0.259033	1.71453	0.0994121	0.850755	-4.52194
CSF1R	0.148804	0.148804	1.71397	0.0995171	0.850755	-4.52275
HCG4P3	0.124448	0.124448	1.71351	0.0996029	0.850755	-4.52342
COLEC12	0.390529	0.390529	1.71307	0.099685	0.850755	-4.52405
ZNF79	0.162667	0.162667	1.71268	0.0997573	0.850755	-4.52461
GTF2IP8	0.1226	0.1226	1.7126	0.0997713	0.850755	-4.52472
TBC1D3P6	0.125499	0.125499	1.71226	0.0998349	0.850755	-4.52521
SPINK2	0.109815	0.109815	1.71214	0.0998575	0.850755	-4.52538
ARAP3	0.128408	0.128408	1.71175	0.0999318	0.850755	-4.52595
IGBP1-AS1	0.104294	0.104294	1.71137	0.100002	0.850755	-4.5265
GLIS1	0.132938	0.132938	1.71137	0.100003	0.850755	-4.5265
IMPACT	0.208473	0.208473	1.71064	0.100139	0.850755	-4.52755
PKM	0.238994	0.238994	1.71039	0.100185	0.850755	-4.52791
UCN2	0.136021	0.136021	1.71036	0.100192	0.850755	-4.52796
KCNN2	0.153	0.153	1.71015	0.100231	0.850755	-4.52825
TBC1D16	0.147675	0.147675	1.70991	0.100276	0.850755	-4.5286
UBE2E1-AS1	0.101439	0.101439	1.70984	0.100289	0.850755	-4.5287
PLEKHA2	0.202395	0.202395	1.70701	0.100821	0.850755	-4.53278
ADH5P4	0.104706	0.104706	1.70699	0.100824	0.850755	-4.5328
SGCZ	0.111558	0.111558	1.70694	0.100834	0.850755	-4.53287
PCDHB14	0.117514	0.117514	1.70668	0.100884	0.850755	-4.53325
IGKV1OR10-1	0.101723	0.101723	1.70658	0.100903	0.850755	-4.5334
SUMO3	0.131597	0.131597	1.70632	0.100952	0.850755	-4.53377
ESYT2	0.173597	0.173597	1.70625	0.100965	0.850755	-4.53387
UBE2Q2P11	0.141479	0.141479	1.70623	0.100968	0.850755	-4.53389
ZBTB6	0.143815	0.143815	1.70614	0.100986	0.850755	-4.53403
IAPP	0.124688	0.124688	1.70604	0.101004	0.850755	-4.53417
SARNP	0.169007	0.169007	1.706	0.101012	0.850755	-4.53423
SLC5A2	0.0910988	0.0910988	1.70594	0.101023	0.850755	-4.53431
ANXA2	0.216544	0.216544	1.70577	0.101055	0.850755	-4.53455
ATOH8	0.166132	0.166132	1.70473	0.101251	0.851699	-4.53605
UBE2R2-AS1	0.115865	0.115865	1.70461	0.101274	0.851699	-4.53622
NXPH4	0.129452	0.129452	1.70403	0.101385	0.851699	-4.53707
LAMB1	0.221405	0.221405	1.70278	0.101622	0.852639	-4.53886
IKZF2	0.207853	0.207853	1.70216	0.101738	0.852933	-4.53974
MBL2	0.133342	0.133342	1.7013	0.101903	0.853419	-4.54098
AP2B1	0.166717	0.166717	1.70097	0.101965	0.853419	-4.54145
CD209	0.123457	0.123457	1.70013	0.102125	0.853419	-4.54265
MRPS24	0.109231	0.109231	1.70003	0.102145	0.853419	-4.54281
GRAMD4P3	0.118007	0.118007	1.70001	0.102149	0.853419	-4.54284
RNF126	0.137879	0.137879	1.69951	0.102244	0.853419	-4.54355
RNF121	0.115156	0.115156	1.69909	0.102324	0.853419	-4.54415
PPEF1	0.148925	0.148925	1.69909	0.102325	0.853419	-4.54415
REG1A	0.667925	0.667925	1.69875	0.102388	0.853419	-4.54463
FIBCD1	0.157055	0.157055	1.69837	0.102461	0.853644	-4.54518
SLCO3A1	0.148228	0.148228	1.69784	0.102562	0.853968	-4.54594
MGARP	0.148033	0.148033	1.69732	0.102662	0.854272	-4.54668
DERL2	0.106639	0.106639	1.6969	0.102743	0.854667	-4.54729
TRIM40	0.154211	0.154211	1.69607	0.102902	0.855292	-4.54848
SMC6	0.119081	0.119081	1.69562	0.102988	0.855292	-4.54912
MGST3	0.167631	0.167631	1.69503	0.103102	0.855292	-4.54996
PSAP	0.162345	0.162345	1.69492	0.103122	0.855292	-4.55012
GTF2H1	0.181081	0.181081	1.69488	0.103131	0.855292	-4.55018
EIF4E2	0.122238	0.122238	1.69441	0.10322	0.855292	-4.55084
PYGO2	0.147222	0.147222	1.69431	0.10324	0.855292	-4.551
MAMLD1	0.134209	0.134209	1.69424	0.103254	0.855292	-4.5511
CLEC5A	0.23063	0.23063	1.6938	0.103337	0.855628	-4.55172
EIF4G1	0.162233	0.162233	1.69289	0.103513	0.8564	-4.55302
MUC1	0.33564	0.33564	1.69258	0.103573	0.856494	-4.55347
OR8F1P	0.128967	0.128967	1.69178	0.103728	0.856932	-4.55462
VAC14-AS1	0.155273	0.155273	1.69174	0.103735	0.856932	-4.55466
MRPS36	0.159247	0.159247	1.69097	0.103883	0.856973	-4.55576
DPPA5P1	0.124732	0.124732	1.69077	0.103923	0.856973	-4.55606
MEIS1	0.269569	0.269569	1.69067	0.103941	0.856973	-4.55619
KCNK1	0.143038	0.143038	1.68974	0.104123	0.857315	-4.55753
BEAN1-AS1	0.17798	0.17798	1.68891	0.104284	0.858101	-4.55872
TPH2	0.153363	0.153363	1.68876	0.104311	0.858101	-4.55892
STX8	0.18514	0.18514	1.68809	0.104441	0.858101	-4.55987
ELP6	0.127919	0.127919	1.68752	0.104553	0.858101	-4.56069
FLJ38576	0.130589	0.130589	1.68741	0.104575	0.858101	-4.56086
CYCSP38	0.191889	0.191889	1.68735	0.104586	0.858101	-4.56094
LAT2	0.137269	0.137269	1.68725	0.104605	0.858101	-4.56107
UBE2Q2P9	0.117314	0.117314	1.68707	0.10464	0.858101	-4.56133
PARVG	0.164342	0.164342	1.68702	0.104651	0.858101	-4.56141
TTC34	0.123422	0.123422	1.68702	0.104651	0.858101	-4.56141
TAF13	0.0983343	0.0983343	1.687	0.104654	0.858101	-4.56144
ZBED6	0.167591	0.167591	1.68692	0.104671	0.858101	-4.56155
SLC25A30-AS1	0.115039	0.115039	1.6859	0.104868	0.858319	-4.563
CLUHP4	0.130717	0.130717	1.68577	0.104894	0.858319	-4.56319
MYH9	0.223584	0.223584	1.68569	0.104909	0.858319	-4.5633
SGCD	0.181474	0.181474	1.68489	0.105065	0.858799	-4.56444
ZNF175	0.139205	0.139205	1.68468	0.105106	0.858799	-4.56474
AIF1	0.314613	0.314613	1.68418	0.105204	0.858799	-4.56545
MTND6P8	0.103391	0.103391	1.6841	0.105219	0.858799	-4.56556
SRY	0.121635	0.121635	1.68373	0.105292	0.85914	-4.56609
FKBP7	0.228911	0.228911	1.68356	0.105326	0.859159	-4.56634
ZSCAN31	0.143645	0.143645	1.68303	0.105428	0.859549	-4.56708
ZFYVE9	0.171646	0.171646	1.68173	0.105683	0.859943	-4.56894
NBPF15	0.140044	0.140044	1.68173	0.105684	0.859943	-4.56894
CEP126	0.131894	0.131894	1.68162	0.105705	0.859943	-4.56909
GLYCAM1	0.118832	0.118832	1.68156	0.105717	0.859943	-4.56918
THSD1	0.17604	0.17604	1.68146	0.105737	0.859943	-4.56932
TUBB8P10	0.119987	0.119987	1.68075	0.105875	0.860677	-4.57033
A2M-AS1	0.109015	0.109015	1.68057	0.105912	0.860677	-4.57059
VASP	0.141256	0.141256	1.68052	0.105922	0.860677	-4.57066
CDKN2B-AS1	0.163299	0.163299	1.6802	0.105985	0.860937	-4.57112
HMGB3P7	0.114797	0.114797	1.6798	0.106063	0.861229	-4.57168
GLIS2	0.142386	0.142386	1.67921	0.10618	0.861229	-4.57252
TNFSF12-TNFSF13	0.110163	0.110163	1.6791	0.106201	0.861229	-4.57268
LYPLAL1	0.17046	0.17046	1.67882	0.106256	0.861229	-4.57307
PPP2R1B	0.107379	0.107379	1.67873	0.106274	0.861229	-4.5732
BMP6	0.166322	0.166322	1.67763	0.106491	0.862481	-4.57477
RPL21P33	0.133453	0.133453	1.67646	0.106722	0.863635	-4.57642
CHAT	0.120007	0.120007	1.67643	0.106729	0.863635	-4.57647
KCTD15	0.119138	0.119138	1.67609	0.106795	0.863728	-4.57695
INSR	0.113803	0.113803	1.67556	0.106901	0.863728	-4.57771
MYO3A	0.12492	0.12492	1.6751	0.106992	0.863728	-4.57836
SLC7A11	0.236984	0.236984	1.67504	0.107004	0.863728	-4.57845
FAM20B	0.110737	0.110737	1.67486	0.107038	0.863728	-4.57869
GTF2I	0.134178	0.134178	1.67474	0.107063	0.863728	-4.57887
TRPM2	0.0987201	0.0987201	1.67461	0.107088	0.863728	-4.57905
KDM6B	0.0971683	0.0971683	1.67387	0.107235	0.864089	-4.58009
INSM1	0.160588	0.160588	1.67353	0.107303	0.864089	-4.58058
FABP7P1	0.162257	0.162257	1.67323	0.107363	0.864089	-4.58101
FCHSD2	0.119222	0.119222	1.67314	0.107381	0.864089	-4.58113
MAP1LC3BP1	0.132965	0.132965	1.67277	0.107455	0.864389	-4.58166
TEAD2	0.166433	0.166433	1.67227	0.107554	0.864636	-4.58237
CREB1	0.130715	0.130715	1.67173	0.107661	0.864636	-4.58313
UBA52P9	0.11446	0.11446	1.67117	0.107773	0.864636	-4.58392
HMCN1	0.172035	0.172035	1.67093	0.107821	0.864636	-4.58426
FLJ13224	0.140665	0.140665	1.67079	0.107849	0.864636	-4.58446
IRX1	0.159745	0.159745	1.67077	0.107852	0.864636	-4.58449
RXFP1	0.135236	0.135236	1.67068	0.10787	0.864636	-4.58461
ZSWIM4	0.100376	0.100376	1.6705	0.107907	0.864636	-4.58487
ATP2B2-IT1	0.111184	0.111184	1.67049	0.107908	0.864636	-4.58488
CYB5R3	0.148713	0.148713	1.67034	0.107938	0.864636	-4.5851
CRYM	0.111879	0.111879	1.67005	0.107997	0.864636	-4.58551
ZSCAN9	0.112691	0.112691	1.66944	0.108119	0.864636	-4.58638
OXA1L	0.157364	0.157364	1.66868	0.10827	0.864662	-4.58744
TESK1	0.139712	0.139712	1.66853	0.108301	0.864662	-4.58766
CERS2	0.132577	0.132577	1.668	0.108406	0.864662	-4.5884
GPR141	0.158728	0.158728	1.66792	0.108423	0.864662	-4.58852
MRPL27	0.118343	0.118343	1.66721	0.108565	0.865369	-4.58952
WNT8A	0.121398	0.121398	1.66708	0.108591	0.865369	-4.58971
P2RY6	0.112804	0.112804	1.66643	0.108721	0.865369	-4.59062
MYLPF	0.126185	0.126185	1.66634	0.108739	0.865369	-4.59075
TLR4	0.201077	0.201077	1.66622	0.108764	0.865369	-4.59092
LMNTD2	0.0822609	0.0822609	1.66598	0.108812	0.865369	-4.59126
PKP4	0.145512	0.145512	1.66538	0.108933	0.865816	-4.59211
MAP3K6	0.149066	0.149066	1.66516	0.108978	0.865922	-4.59242
COMMD5	0.107813	0.107813	1.66437	0.109137	0.866932	-4.59353
SLC4A11	0.198418	0.198418	1.66419	0.109173	0.86697	-4.59379
ARRDC1	0.1685	0.1685	1.66344	0.109325	0.867095	-4.59485
FPR2	0.279807	0.279807	1.66331	0.10935	0.867095	-4.59503
SURF4	0.170298	0.170298	1.66241	0.109532	0.867095	-4.5963
CT47A12	0.136539	0.136539	1.66221	0.109572	0.867095	-4.59658
CT47A10	0.136539	0.136539	1.66221	0.109572	0.867095	-4.59658
CT47A9	0.136539	0.136539	1.66221	0.109572	0.867095	-4.59658
CT47A6	0.136539	0.136539	1.66221	0.109572	0.867095	-4.59658
CT47A3	0.136539	0.136539	1.66221	0.109572	0.867095	-4.59658
CT47A2	0.136539	0.136539	1.66221	0.109572	0.867095	-4.59658
DLG3-AS1	0.0987975	0.0987975	1.66115	0.109786	0.867203	-4.59807
ZBTB11-AS1	0.107087	0.107087	1.66109	0.1098	0.867203	-4.59816
NCKAP5L	0.101011	0.101011	1.66105	0.109807	0.867203	-4.59821
TRIM49D1	0.12935	0.12935	1.66001	0.110018	0.867513	-4.59968
TRBV3-1	0.119556	0.119556	1.6592	0.110182	0.867513	-4.60082
RPL3	0.128802	0.128802	1.65918	0.110187	0.867513	-4.60085
TRBV19	0.122874	0.122874	1.65905	0.110212	0.867513	-4.60102
ARHGEF10	0.166881	0.166881	1.65892	0.110239	0.867513	-4.60121
IGFL2	0.268716	0.268716	1.65886	0.110253	0.867513	-4.6013
SLC22A15	0.117073	0.117073	1.65884	0.110256	0.867513	-4.60132
OSBPL5	0.144767	0.144767	1.65872	0.110281	0.867513	-4.6015
POLR3H	0.145195	0.145195	1.65865	0.110295	0.867513	-4.60159
GAPDHP64	0.111193	0.111193	1.65836	0.110353	0.867513	-4.602
IL6R	0.122999	0.122999	1.65813	0.1104	0.867549	-4.60232
IFNA14	0.114574	0.114574	1.65802	0.110423	0.867549	-4.60248
TMEM132E	0.112408	0.112408	1.65787	0.110453	0.867549	-4.60269
FZD1	0.113098	0.113098	1.6564	0.110752	0.868443	-4.60475
ITGB1	0.255777	0.255777	1.65629	0.110775	0.868443	-4.60491
NRK	0.136929	0.136929	1.65567	0.110901	0.868443	-4.60578
ENO1	0.165388	0.165388	1.65551	0.110935	0.868443	-4.60601
CACFD1	0.110614	0.110614	1.65546	0.110945	0.868443	-4.60608
CYP2A7P1	0.119671	0.119671	1.65515	0.111009	0.868443	-4.60652
ERGIC1	0.161421	0.161421	1.65508	0.111022	0.868443	-4.60661
RAB13	0.116039	0.116039	1.65482	0.111077	0.868443	-4.60698
ANKDD1A	0.122304	0.122304	1.65478	0.111084	0.868443	-4.60703
PPP1R26P1	0.110584	0.110584	1.65387	0.111271	0.868604	-4.60831
RARRES2	0.20851	0.20851	1.65372	0.111301	0.868604	-4.60852
TFE3	0.0956517	0.0956517	1.65357	0.111331	0.868604	-4.60873
UBQLN4P2	0.146584	0.146584	1.65323	0.111402	0.868604	-4.60921
AHNAK	0.138609	0.138609	1.65312	0.111423	0.868604	-4.60936
PDGFA	0.146307	0.146307	1.65229	0.111595	0.868604	-4.61054
BAAT	0.195515	0.195515	1.65216	0.11162	0.868604	-4.61071
GLTP	0.122872	0.122872	1.65215	0.111623	0.868604	-4.61073
GPX6	0.153005	0.153005	1.65196	0.111662	0.868604	-4.61099
PGAM1P11	0.118447	0.118447	1.65194	0.111666	0.868604	-4.61102
RNF41	0.124306	0.124306	1.65151	0.111756	0.868604	-4.61163
ECSCR	0.0992358	0.0992358	1.65147	0.111763	0.868604	-4.61168
WFDC21P	0.156112	0.156112	1.65113	0.111833	0.868604	-4.61216
VAV3-AS1	0.135055	0.135055	1.65111	0.111837	0.868604	-4.61218
PPP2R2DP1	0.133194	0.133194	1.65067	0.111927	0.868604	-4.6128
FER1L6	0.15806	0.15806	1.65059	0.111945	0.868604	-4.61292
PRKACA	0.139662	0.139662	1.65024	0.112017	0.868604	-4.61341
VOPP1	0.13045	0.13045	1.65017	0.112031	0.868604	-4.61351
JAM2	0.267134	0.267134	1.64914	0.112243	0.869344	-4.61495
NFYB	0.206027	0.206027	1.64911	0.112249	0.869344	-4.61499
MDH1	0.176576	0.176576	1.64834	0.112408	0.869858	-4.61607
MORF4L1	0.177964	0.177964	1.64821	0.112436	0.869858	-4.61626
SCNN1D	0.148777	0.148777	1.64765	0.11255	0.87025	-4.61703
HSPB1P1	0.184843	0.184843	1.64696	0.112693	0.870984	-4.61799
HNRNPA1P56	0.11462	0.11462	1.64565	0.112966	0.871924	-4.61984
MPV17	0.157755	0.157755	1.64562	0.112971	0.871924	-4.61987
NDUFV2	0.194698	0.194698	1.64553	0.112991	0.871924	-4.62
RPL7AP25	0.114636	0.114636	1.64521	0.113056	0.872182	-4.62044
CABIN1	0.12309	0.12309	1.64476	0.11315	0.872399	-4.62108
[truncated: 25,303 more rows]

## Sheet: PP
Gene	logFC	AveExpr	t	P.Value	adj.P.Val	B
PTPRD	0.699103	0.699103	5.38173	8.63132e-05	0.777249	-2.35711
KNDC1	0.453789	0.453789	4.79212	0.000261949	0.997664	-2.59051
MIMT1	0.419681	0.419681	4.45214	0.000506319	0.997664	-2.74159
UPK3B	0.39128	0.39128	3.98753	0.00126925	0.997664	-2.96832
MPZ	0.523899	0.523899	3.94207	0.00138993	0.997664	-2.99175
MMP15	0.432149	0.432149	3.94057	0.00139412	0.997664	-2.99253
CYP4F12	0.394576	0.394576	3.88022	0.00157313	0.997664	-3.02399
SNORD4A	0.594546	0.594546	3.74864	0.00204868	0.997664	-3.09391
SNAR-C3	0.734386	0.734386	3.69686	0.00227356	0.997664	-3.1219
TMTC4	0.402904	0.402904	3.69479	0.00228306	0.997664	-3.12303
LRCOL1	0.376093	0.376093	3.68019	0.00235117	0.997664	-3.13098
GATA5	0.293883	0.293883	3.65796	0.0024588	0.997664	-3.14312
SNAR-E	0.708747	0.708747	3.639	0.00255455	0.997664	-3.15351
EPHA7	0.339589	0.339589	3.63847	0.00255726	0.997664	-3.1538
IPO4	0.359304	0.359304	3.62802	0.00261172	0.997664	-3.15955
SNAR-I	0.435909	0.435909	3.62158	0.00264583	0.997664	-3.16309
CASC21	0.625598	0.625598	3.61512	0.00268051	0.997664	-3.16665
NUTF2	0.465134	0.465134	3.61332	0.00269026	0.997664	-3.16764
SNAR-B2	0.654073	0.654073	3.56708	0.00295312	0.997664	-3.19325
RPL31P50	0.374749	0.374749	3.52371	0.00322316	0.997664	-3.21746
CYP4F10P	0.357676	0.357676	3.51551	0.00327694	0.997664	-3.22206
TSPAN33	0.311026	0.311026	3.50105	0.003374	0.997664	-3.23018
IL36A	0.3829	0.3829	3.49385	0.00342337	0.997664	-3.23423
GRINA	0.370124	0.370124	3.49059	0.00344596	0.997664	-3.23606
SLC6A3	0.363545	0.363545	3.4902	0.00344872	0.997664	-3.23629
RNF128	0.461593	0.461593	3.48403	0.00349191	0.997664	-3.23976
TTYH3	0.288153	0.288153	3.44744	0.00375962	0.997664	-3.26046
PTPMT1	0.48254	0.48254	3.42205	0.00395741	0.997664	-3.27489
SUV39H1	0.355488	0.355488	3.41372	0.00402448	0.997664	-3.27963
ELMO2	0.347464	0.347464	3.40969	0.00405744	0.997664	-3.28194
NPHS2	0.360952	0.360952	3.40755	0.00407494	0.997664	-3.28315
DOK5	0.297426	0.297426	3.34675	0.00460733	0.997664	-3.31803
RPAIN	0.362351	0.362351	3.33259	0.0047409	0.997664	-3.32619
RPP21	0.322699	0.322699	3.30773	0.00498493	0.997664	-3.34057
SP5	0.318198	0.318198	3.25622	0.00553116	0.997664	-3.37052
ADCYAP1R1	0.317591	0.317591	3.24925	0.0056096	0.997664	-3.3746
PLAGL2	0.519954	0.519954	3.24795	0.00562426	0.997664	-3.37535
PDK3	0.431283	0.431283	3.23205	0.0058077	0.997664	-3.38466
ZNF750	0.399036	0.399036	3.215	0.00601089	0.997664	-3.39465
C8orf86	0.324154	0.324154	3.20171	0.00617421	0.997664	-3.40245
SNAR-D	0.461276	0.461276	3.17851	0.00646997	0.997664	-3.41611
AURKB	0.255387	0.255387	3.16492	0.00664968	0.997664	-3.42413
STH	0.249617	0.249617	3.15668	0.00676116	0.997664	-3.42901
SDC1	0.379925	0.379925	3.15453	0.00679045	0.997664	-3.43027
CES1	0.304266	0.304266	3.13638	0.00704347	0.997664	-3.44102
PMEPA1	0.392088	0.392088	3.13397	0.00707771	0.997664	-3.44245
DGCR12	0.366979	0.366979	3.12935	0.00714392	0.997664	-3.44519
ADAMTS7	0.308915	0.308915	3.1233	0.00723156	0.997664	-3.44878
SH2D3A	0.286673	0.286673	3.12307	0.00723489	0.997664	-3.44892
ZNF774	0.383471	0.383471	3.1224	0.00724458	0.997664	-3.44931
SMIM13	0.300173	0.300173	3.12211	0.00724881	0.997664	-3.44948
MAFK	0.308311	0.308311	3.1109	0.00741439	0.997664	-3.45615
NKD1	0.491607	0.491607	3.10501	0.00750284	0.997664	-3.45965
SYT10	0.37093	0.37093	3.10345	0.0075264	0.997664	-3.46057
FAUP2	0.393979	0.393979	3.10114	0.00756161	0.997664	-3.46195
KRT18P12	0.266138	0.266138	3.06512	0.00813015	0.997664	-3.48344
SIM2	0.601139	0.601139	3.06392	0.00814972	0.997664	-3.48415
SCN3B	0.272177	0.272177	3.04983	0.00838401	0.997664	-3.49258
FRAT1	0.326692	0.326692	3.04851	0.00840625	0.997664	-3.49337
CLEC4G	0.242226	0.242226	3.04705	0.00843094	0.997664	-3.49424
DIS3	0.351109	0.351109	3.04428	0.00847814	0.997664	-3.4959
IRX4	0.267338	0.267338	3.04335	0.00849401	0.997664	-3.49646
TROAP	0.340361	0.340361	3.02939	0.00873576	0.997664	-3.50483
STMN1P1	0.309819	0.309819	3.02938	0.00873582	0.997664	-3.50483
EN2	0.286102	0.286102	3.02588	0.00879752	0.997664	-3.50693
SNAR-G2	0.680442	0.680442	3.02443	0.0088232	0.997664	-3.5078
IGFBP2	0.303492	0.303492	3.02299	0.00884876	0.997664	-3.50867
NDUFB4P6	0.334137	0.334137	3.01987	0.00890441	0.997664	-3.51054
OR10A5	0.30955	0.30955	3.01496	0.00899271	0.997664	-3.51349
TMEM9	0.259144	0.259144	3.01362	0.00901689	0.997664	-3.51429
KRT16P4	0.278432	0.278432	3.01048	0.00907409	0.997664	-3.51618
NYNRIN	0.364224	0.364224	3.00133	0.00924225	0.997664	-3.52168
PPP1R13B	0.261527	0.261527	2.99928	0.00928036	0.997664	-3.52292
MYB	0.627311	0.627311	2.99693	0.00932429	0.997664	-3.52433
SLC10A4	0.32778	0.32778	2.99518	0.00935715	0.997664	-3.52539
NKX2-4	0.297596	0.297596	2.99518	0.00935717	0.997664	-3.52539
MSX1	0.31588	0.31588	2.99271	0.00940365	0.997664	-3.52687
HNRNPA1P46	0.294096	0.294096	2.97724	0.00970019	0.997664	-3.53619
SLC16A5	0.250759	0.250759	2.97313	0.00978052	0.997664	-3.53867
RPS7P15	0.395272	0.395272	2.95811	0.0100797	0.997664	-3.54774
ACSM2B	0.259285	0.259285	2.95658	0.0101108	0.997664	-3.54867
PAFAH1B3	0.26271	0.26271	2.9473	0.0103005	0.997664	-3.55427
SRMP2	0.340464	0.340464	2.94652	0.0103167	0.997664	-3.55475
FAM153A	0.339679	0.339679	2.94633	0.0103206	0.997664	-3.55486
MLKL	0.320897	0.320897	2.93344	0.0105907	0.997664	-3.56266
UBL5P3	0.319804	0.319804	2.93121	0.0106381	0.997664	-3.56401
DAGLA	0.304013	0.304013	2.92785	0.01071	0.997664	-3.56605
HOXA11	0.255033	0.255033	2.92315	0.0108113	0.997664	-3.5689
TIMM10B	0.29818	0.29818	2.92218	0.0108324	0.997664	-3.56949
AGXT	0.242984	0.242984	2.91153	0.0110658	0.997664	-3.57594
SNAR-A3	0.638632	0.638632	2.90175	0.0112845	0.997664	-3.58188
SNAR-A5	0.638632	0.638632	2.90175	0.0112845	0.997664	-3.58188
SNAR-A7	0.638632	0.638632	2.90175	0.0112845	0.997664	-3.58188
SNAR-A4	0.638632	0.638632	2.90175	0.0112845	0.997664	-3.58188
SNAR-A6	0.638632	0.638632	2.90175	0.0112845	0.997664	-3.58188
SNAR-A8	0.638632	0.638632	2.90175	0.0112845	0.997664	-3.58188
NPM1P50	0.334281	0.334281	2.90144	0.0112915	0.997664	-3.58206
SKP2	0.461741	0.461741	2.90125	0.011296	0.997664	-3.58218
MCM3AP-AS1	0.308895	0.308895	2.89837	0.0113612	0.997664	-3.58393
IGDCC4	0.244457	0.244457	2.89103	0.0115292	0.997664	-3.58839
ZNF729	0.345146	0.345146	2.88382	0.0116966	0.997664	-3.59277
PCCA	0.331302	0.331302	2.88274	0.0117219	0.997664	-3.59343
BFSP1	0.232096	0.232096	2.86646	0.0121098	0.997664	-3.60334
PRRG2	0.265847	0.265847	2.8635	0.0121815	0.997664	-3.60514
ZNF850	0.453073	0.453073	2.85902	0.012291	0.997664	-3.60787
C22orf23	0.295717	0.295717	2.85531	0.0123825	0.997664	-3.61013
FECHP1	0.26278	0.26278	2.85518	0.0123856	0.997664	-3.61021
SNAR-G1	0.312286	0.312286	2.85327	0.012433	0.997664	-3.61137
FOXD4	0.352183	0.352183	2.84962	0.012524	0.997664	-3.6136
SLC9A3R2	0.346431	0.346431	2.84941	0.0125292	0.997664	-3.61373
PSMB10	0.271486	0.271486	2.84914	0.0125359	0.997664	-3.61389
IL1A	0.306829	0.306829	2.84893	0.0125413	0.997664	-3.61402
TINAGL1	0.320034	0.320034	2.83927	0.0127855	0.997664	-3.61991
RUSC1	0.240332	0.240332	2.83864	0.0128016	0.997664	-3.6203
SEPHS1P4	0.2916	0.2916	2.83259	0.012957	0.997664	-3.62399
TMEM242	0.335797	0.335797	2.82926	0.0130433	0.997664	-3.62602
GAPDHP24	0.259101	0.259101	2.82755	0.013088	0.997664	-3.62707
MOGAT1	0.384058	0.384058	2.82418	0.0131761	0.997664	-3.62912
IZUMO2	0.292266	0.292266	2.82057	0.0132715	0.997664	-3.63133
GJC2	0.300823	0.300823	2.81685	0.0133702	0.997664	-3.6336
OR2AQ1P	0.258703	0.258703	2.81167	0.0135089	0.997664	-3.63677
ZNF473	0.263051	0.263051	2.80103	0.0137985	0.997664	-3.64328
CBLC	0.358161	0.358161	2.80097	0.0138	0.997664	-3.64331
RFPL4AP6	0.27372	0.27372	2.79822	0.0138759	0.997664	-3.64499
CYP2B6	0.563366	0.563366	2.78799	0.0141613	0.997664	-3.65125
GSTA10P	0.311671	0.311671	2.78439	0.0142632	0.997664	-3.65346
TEX2	0.288678	0.288678	2.78289	0.0143058	0.997664	-3.65438
TMEM191A	0.316643	0.316643	2.77587	0.0145072	0.997664	-3.65868
RPL14P5	0.320518	0.320518	2.77479	0.0145384	0.997664	-3.65934
SYPL2	0.277797	0.277797	2.77433	0.0145518	0.997664	-3.65963
SF3A2	0.266723	0.266723	2.77356	0.014574	0.997664	-3.6601
COX6A1P3	0.28112	0.28112	2.77264	0.0146007	0.997664	-3.66066
ACTR5	0.244703	0.244703	2.76566	0.0148047	0.997664	-3.66494
SFTPB	0.227816	0.227816	2.76077	0.0149494	0.997664	-3.66794
EPHB1	0.324815	0.324815	2.75995	0.0149737	0.997664	-3.66844
PDX1	0.268685	0.268685	2.75897	0.0150031	0.997664	-3.66904
OR13D3P	0.262228	0.262228	2.75652	0.0150761	0.997664	-3.67054
SHC3	0.283878	0.283878	2.75078	0.0152492	0.997664	-3.67407
BRIX1	0.316908	0.316908	2.74827	0.0153254	0.997664	-3.67561
SNAR-C4	0.535114	0.535114	2.74788	0.0153374	0.997664	-3.67585
IPMK	0.273308	0.273308	2.74702	0.0153636	0.997664	-3.67638
NLRC5	0.374824	0.374824	2.73674	0.0156805	0.997664	-3.68269
SMTNL1	0.255248	0.255248	2.73496	0.0157358	0.997664	-3.68378
ARL5A	0.29886	0.29886	2.73415	0.0157613	0.997664	-3.68428
IQGAP3	0.226413	0.226413	2.73373	0.0157743	0.997664	-3.68453
KRT8P12	0.284917	0.284917	2.72758	0.0159681	0.997664	-3.68831
B4GALNT1	0.226208	0.226208	2.7268	0.0159926	0.997664	-3.68879
KAT2A	0.331198	0.331198	2.71851	0.016258	0.997664	-3.69389
ZNF511	0.299908	0.299908	2.71793	0.0162768	0.997664	-3.69424
SNAR-C2	0.67048	0.67048	2.7174	0.0162937	0.997664	-3.69457
SNAR-C5	0.67048	0.67048	2.7174	0.0162937	0.997664	-3.69457
LTBP2	0.297985	0.297985	2.71618	0.0163331	0.997664	-3.69532
CDH3	0.387501	0.387501	2.71004	0.0165332	0.997664	-3.69909
DYNLT3	0.297747	0.297747	2.71003	0.0165335	0.997664	-3.6991
ZNF213	0.271835	0.271835	2.7066	0.0166463	0.997664	-3.70121
IFITM5	0.23496	0.23496	2.70577	0.0166739	0.997664	-3.70172
PHBP11	0.364887	0.364887	2.70468	0.0167098	0.997664	-3.70239
NGF	0.231157	0.231157	2.70407	0.0167302	0.997664	-3.70277
WFDC8	0.336038	0.336038	2.70193	0.0168012	0.997664	-3.70408
CYP4F30P	0.295805	0.295805	2.69384	0.0170726	0.997664	-3.70906
SPACA4	0.299727	0.299727	2.68854	0.0172526	0.997664	-3.71232
DTX1	0.306796	0.306796	2.68656	0.0173205	0.997664	-3.71354
INMT	0.338893	0.338893	2.68382	0.0174145	0.997664	-3.71523
GNA15	0.276621	0.276621	2.68257	0.0174576	0.997664	-3.716
GAPDHP20	0.29003	0.29003	2.68238	0.0174641	0.997664	-3.71611
MSN	0.321715	0.321715	2.68192	0.0174803	0.997664	-3.7164
DNAAF5	0.313726	0.313726	2.68178	0.0174849	0.997664	-3.71648
DNMT3B	0.303066	0.303066	2.67925	0.0175727	0.997664	-3.71804
RPS6KB2	0.249017	0.249017	2.6763	0.0176756	0.997664	-3.71986
NCCRP1	0.240728	0.240728	2.67218	0.0178202	0.997664	-3.7224
GYG2	0.581725	0.581725	2.66949	0.0179151	0.997664	-3.72405
WFDC6	0.342507	0.342507	2.66723	0.0179956	0.997664	-3.72545
NRBF2	0.257749	0.257749	2.6672	0.0179965	0.997664	-3.72547
CRYM-AS1	0.264971	0.264971	2.66585	0.0180447	0.997664	-3.7263
EPHB2	0.460005	0.460005	2.65826	0.0183174	0.997664	-3.73098
RASL11A	0.310084	0.310084	2.65485	0.0184411	0.997664	-3.73308
SRXN1	0.250893	0.250893	2.65485	0.0184411	0.997664	-3.73308
PIGX	0.309998	0.309998	2.65458	0.018451	0.997664	-3.73324
FBXL16	0.226468	0.226468	2.65316	0.0185029	0.997664	-3.73412
ADRM1	0.326327	0.326327	2.6526	0.0185231	0.997664	-3.73446
CYBA	0.248038	0.248038	2.65226	0.0185356	0.997664	-3.73467
TTC7B	0.244145	0.244145	2.65062	0.0185958	0.997664	-3.73569
AURKAIP1	0.242869	0.242869	2.64858	0.018671	0.997664	-3.73695
ANKRD39	0.243557	0.243557	2.6466	0.0187439	0.997664	-3.73816
EVC2	0.326056	0.326056	2.64616	0.0187602	0.997664	-3.73843
PLPP2	0.458654	0.458654	2.64347	0.0188602	0.997664	-3.74009
TBX21	0.253544	0.253544	2.64262	0.0188918	0.997664	-3.74062
TBX18	0.391552	0.391552	2.64062	0.0189665	0.997664	-3.74185
WDR74	0.281002	0.281002	2.63808	0.0190617	0.997664	-3.74342
S100A7A	0.317786	0.317786	2.63742	0.0190865	0.997664	-3.74382
NCBP1	0.256184	0.256184	2.6368	0.0191102	0.997664	-3.74421
SYT7	0.28688	0.28688	2.63674	0.0191124	0.997664	-3.74425
PRODH2	0.30232	0.30232	2.63357	0.019232	0.997664	-3.7462
RPL7L1P12	0.262779	0.262779	2.62713	0.0194781	0.997664	-3.75018
KLF1	0.345489	0.345489	2.62442	0.0195823	0.997664	-3.75185
UNC5CL	0.262395	0.262395	2.61698	0.0198714	0.997664	-3.75644
LIG1	0.333947	0.333947	2.61678	0.0198792	0.997664	-3.75656
NDUFS5P5	0.321812	0.321812	2.61608	0.019907	0.997664	-3.757
ZBED9	0.299316	0.299316	2.61274	0.0200381	0.997664	-3.75905
CFAP74	0.274778	0.274778	2.61088	0.0201117	0.997664	-3.7602
HMGXB3	0.282704	0.282704	2.60989	0.0201508	0.997664	-3.76081
PHC1	0.281317	0.281317	2.60826	0.0202156	0.997664	-3.76182
PLGRKT	0.25195	0.25195	2.60592	0.0203092	0.997664	-3.76327
TBCB	0.245677	0.245677	2.60251	0.0204459	0.997664	-3.76537
AHCY	0.282972	0.282972	2.60223	0.0204569	0.997664	-3.76554
SNORA71C	0.502423	0.502423	2.60039	0.0205312	0.997664	-3.76668
SAPCD2P1	0.240203	0.240203	2.59904	0.020586	0.997664	-3.76751
PHBP7	0.286288	0.286288	2.59903	0.0205863	0.997664	-3.76752
MAFF	0.308441	0.308441	2.58777	0.0210473	0.997664	-3.77447
CD24P4	0.514203	0.514203	2.58649	0.0211003	0.997664	-3.77526
COL18A1-AS1	0.228031	0.228031	2.58493	0.0211653	0.997664	-3.77623
CCT3	0.277047	0.277047	2.57937	0.0213978	0.997664	-3.77966
HSBP1	0.412757	0.412757	2.57846	0.0214359	0.997664	-3.78022
SLC25A48	0.206315	0.206315	2.57195	0.0217116	0.997664	-3.78424
REM1	0.312077	0.312077	2.57045	0.0217757	0.997664	-3.78517
CYP4F24P	0.320244	0.320244	2.56954	0.0218148	0.997664	-3.78574
PPP1R32	0.271802	0.271802	2.56943	0.0218196	0.997664	-3.78581
SEMA4F	0.245449	0.245449	2.56938	0.0218215	0.997664	-3.78583
WIZ	0.25384	0.25384	2.56788	0.0218858	0.997664	-3.78676
CSRP3	0.285084	0.285084	2.56703	0.0219226	0.997664	-3.78729
SNAR-F	0.84624	0.84624	2.55485	0.0224526	0.997664	-3.79481
PLA2G3	0.271384	0.271384	2.55451	0.0224675	0.997664	-3.79502
MED11	0.317361	0.317361	2.5538	0.0224988	0.997664	-3.79546
LYPD5	0.260089	0.260089	2.55236	0.0225626	0.997664	-3.79635
ISX	0.25134	0.25134	2.54853	0.0227328	0.997664	-3.79872
VPS33B	0.284844	0.284844	2.54558	0.0228642	0.997664	-3.80054
CSRNP1	0.306918	0.306918	2.54377	0.0229455	0.997664	-3.80166
ZP1	0.236644	0.236644	2.54301	0.0229796	0.997664	-3.80213
DNM1P35	0.234843	0.234843	2.54221	0.0230159	0.997664	-3.80263
DESI1	0.301326	0.301326	2.53791	0.0232106	0.997664	-3.80529
C2orf74	0.375702	0.375702	2.53391	0.0233931	0.997664	-3.80776
CDK18	0.248405	0.248405	2.53277	0.0234451	0.997664	-3.80846
MRPL12	0.239526	0.239526	2.53248	0.0234587	0.997664	-3.80864
HSBP1L1	0.258874	0.258874	2.53128	0.0235138	0.997664	-3.80938
CABP4	0.242748	0.242748	2.52422	0.0238406	0.997664	-3.81375
RAB17	0.21067	0.21067	2.52332	0.023883	0.997664	-3.81431
SLC27A4	0.218143	0.218143	2.5207	0.0240054	0.997664	-3.81593
CLPB	0.260934	0.260934	2.51925	0.0240737	0.997664	-3.81682
PPP1R2P2	0.331514	0.331514	2.51899	0.0240861	0.997664	-3.81699
VENTXP1	0.224721	0.224721	2.51662	0.0241979	0.997664	-3.81845
ADCYAP1	0.216956	0.216956	2.5156	0.0242459	0.997664	-3.81908
CDH7	0.264419	0.264419	2.5153	0.0242605	0.997664	-3.81927
DNLZ	0.294506	0.294506	2.51522	0.0242642	0.997664	-3.81932
KRT18P4	0.264174	0.264174	2.51378	0.0243324	0.997664	-3.8202
GUSBP12	0.241113	0.241113	2.5119	0.024422	0.997664	-3.82137
FGF22	0.247116	0.247116	2.51073	0.0244778	0.997664	-3.82209
MTRNR2L13	0.451106	0.451106	2.50382	0.0248103	0.997664	-3.82636
IFT27	0.408109	0.408109	2.49995	0.0249989	0.997664	-3.82876
HNRNPA1P24	0.271628	0.271628	2.49988	0.025002	0.997664	-3.8288
ZER1	0.274731	0.274731	2.49599	0.0251928	0.997664	-3.83121
NAGS	0.267112	0.267112	2.49544	0.02522	0.997664	-3.83155
LIMD1	0.270018	0.270018	2.49462	0.0252601	0.997664	-3.83205
CCRL2	0.249453	0.249453	2.49454	0.0252639	0.997664	-3.8321
UBE2C	0.284822	0.284822	2.48648	0.0256643	0.997664	-3.83709
ZNF444P1	0.21442	0.21442	2.48515	0.0257311	0.997664	-3.83791
EHMT1	0.237894	0.237894	2.48404	0.0257865	0.997664	-3.83859
CFAP99	0.309013	0.309013	2.48167	0.0259063	0.997664	-3.84006
GTF2F1	0.265797	0.265797	2.48039	0.0259711	0.997664	-3.84085
SUSD2	0.265853	0.265853	2.47624	0.0261817	0.997664	-3.84342
CLDN17	0.253869	0.253869	2.4746	0.0262656	0.997664	-3.84443
TLX1	0.383496	0.383496	2.4704	0.0264813	0.997664	-3.84703
CD5	0.225872	0.225872	2.46774	0.0266187	0.997664	-3.84867
GRK6	0.258552	0.258552	2.46427	0.0267992	0.997664	-3.85082
MRPS17	0.293991	0.293991	2.46359	0.0268348	0.997664	-3.85124
KLF2P2	0.266369	0.266369	2.46169	0.0269339	0.997664	-3.85241
HNRNPA3	0.196638	0.196638	2.45902	0.0270742	0.997664	-3.85407
PROP1	0.216886	0.216886	2.45873	0.0270893	0.997664	-3.85424
ACCS	0.305832	0.305832	2.45772	0.0271427	0.997664	-3.85487
MYCL	0.289006	0.289006	2.45737	0.0271612	0.997664	-3.85509
GPSM3	0.221969	0.221969	2.45702	0.0271795	0.997664	-3.8553
ZNF600	0.302707	0.302707	2.45686	0.0271883	0.997664	-3.8554
SNAR-A12	0.473316	0.473316	2.45641	0.027212	0.997664	-3.85568
HGS	0.351384	0.351384	2.45628	0.0272191	0.997664	-3.85576
C10orf88	0.255522	0.255522	2.45438	0.0273198	0.997664	-3.85694
HSPB6	0.230442	0.230442	2.45367	0.0273572	0.997664	-3.85737
CISD1P1	0.29529	0.29529	2.45086	0.0275074	0.997664	-3.85911
HNRNPH1P2	0.241458	0.241458	2.44981	0.0275637	0.997664	-3.85976
PRDX3P2	0.245988	0.245988	2.44684	0.027723	0.997664	-3.8616
WDR97	0.270748	0.270748	2.44587	0.027775	0.997664	-3.86219
IGLV3-6	0.323933	0.323933	2.44539	0.0278014	0.997664	-3.8625
TXNP5	0.286462	0.286462	2.44385	0.0278846	0.997664	-3.86345
SMIM10L1	0.231494	0.231494	2.4418	0.0279959	0.997664	-3.86472
DSCR9	0.30163	0.30163	2.44094	0.0280423	0.997664	-3.86524
BTBD11	0.24228	0.24228	2.44	0.028094	0.997664	-3.86583
WNT4	0.226991	0.226991	2.43787	0.0282102	0.997664	-3.86714
ITGA9	0.234193	0.234193	2.43413	0.0284155	0.997664	-3.86945
MTHFD2L	0.311506	0.311506	2.43392	0.0284273	0.997664	-3.86958
C6orf132	0.245421	0.245421	2.43167	0.0285515	0.997664	-3.87097
FBXL6	0.267973	0.267973	2.43092	0.0285932	0.997664	-3.87144
RPL36P18	0.20383	0.20383	2.43072	0.0286043	0.997664	-3.87156
NKX6-1	0.202584	0.202584	2.43047	0.0286182	0.997664	-3.87172
F2	0.236212	0.236212	2.42842	0.0287322	0.997664	-3.87298
CYP2A13	0.24413	0.24413	2.42794	0.0287588	0.997664	-3.87328
PLEKHA8	0.261475	0.261475	2.42598	0.0288686	0.997664	-3.87449
MECP2	0.221467	0.221467	2.42168	0.0291103	0.997664	-3.87715
RPL21P18	0.233947	0.233947	2.42095	0.0291515	0.997664	-3.8776
S100P	0.429925	0.429925	2.4207	0.0291654	0.997664	-3.87775
CDC42EP4	0.295239	0.295239	2.41567	0.0294512	0.997664	-3.88086
ANKRD29	0.364234	0.364234	2.41066	0.0297384	0.997664	-3.88396
C19orf47	0.369829	0.369829	2.40929	0.0298174	0.997664	-3.88481
LIN28A	0.249241	0.249241	2.4082	0.02988	0.997664	-3.88548
FOXD4L1	0.265933	0.265933	2.40787	0.0298996	0.997664	-3.88569
EEF1A1P21	0.224436	0.224436	2.40736	0.0299288	0.997664	-3.886
SLC13A5	0.253839	0.253839	2.40001	0.0303576	0.997664	-3.89054
KRT8P17	0.228359	0.228359	2.4	0.0303584	0.997664	-3.89055
SLC26A10	0.215987	0.215987	2.39663	0.0305567	0.997664	-3.89263
ITGA11	0.269192	0.269192	2.39617	0.030584	0.997664	-3.89291
VN1R91P	0.287415	0.287415	2.39567	0.0306133	0.997664	-3.89322
KCNK9	0.24146	0.24146	2.39436	0.0306911	0.997664	-3.89403
NXN	0.248131	0.248131	2.39411	0.0307057	0.997664	-3.89418
GPATCH2L	0.327318	0.327318	2.39293	0.030776	0.997664	-3.89491
HAGHL	0.284077	0.284077	2.39194	0.0308348	0.997664	-3.89552
PPP1R17	0.219653	0.219653	2.389	0.0310107	0.997664	-3.89734
BCL7A	0.377091	0.377091	2.38375	0.0313269	0.997664	-3.90059
CCT8	0.282144	0.282144	2.38178	0.0314464	0.997664	-3.9018
ARHGEF38	0.324315	0.324315	2.38136	0.0314718	0.997664	-3.90206
CRYAA	0.24768	0.24768	2.37933	0.0315952	0.997664	-3.90331
CNTNAP5	0.263245	0.263245	2.37911	0.0316086	0.997664	-3.90345
GPR162	0.326045	0.326045	2.37874	0.0316311	0.997664	-3.90368
CD300E	0.222989	0.222989	2.37594	0.0318028	0.997664	-3.90541
SRPK3	0.234936	0.234936	2.37352	0.0319517	0.997664	-3.9069
SOX9	0.288987	0.288987	2.37332	0.0319636	0.997664	-3.90702
COX6CP16	0.20886	0.20886	2.37007	0.0321645	0.997664	-3.90903
SRSF1	0.312436	0.312436	2.3692	0.0322188	0.997664	-3.90957
NR2E3	0.257298	0.257298	2.36831	0.0322742	0.997664	-3.91012
GGT7	0.330329	0.330329	2.36736	0.0323331	0.997664	-3.9107
GRAMD4P7	0.20236	0.20236	2.36665	0.0323775	0.997664	-3.91114
PABPC1L2B	0.28604	0.28604	2.36606	0.0324142	0.997664	-3.9115
UQCRC1	0.300741	0.300741	2.36413	0.032535	0.997664	-3.91269
B9D2	0.212295	0.212295	2.36345	0.0325776	0.997664	-3.91311
GADL1	0.304627	0.304627	2.35968	0.0328153	0.997664	-3.91544
TSPY24P	0.217697	0.217697	2.35919	0.0328462	0.997664	-3.91574
ZNF200	0.313791	0.313791	2.35854	0.0328876	0.997664	-3.91615
ARX	0.266413	0.266413	2.35631	0.0330288	0.997664	-3.91752
ZNF292	0.199495	0.199495	2.35525	0.0330965	0.997664	-3.91818
IPO9	0.332074	0.332074	2.35429	0.0331576	0.997664	-3.91877
ALKBH8	0.29473	0.29473	2.35157	0.0333316	0.997664	-3.92045
TRPM2-AS	0.218926	0.218926	2.34951	0.0334642	0.997664	-3.92172
MYCBP2-AS2	0.233687	0.233687	2.34853	0.0335274	0.997664	-3.92232
DPH1	0.217515	0.217515	2.34797	0.0335634	0.997664	-3.92267
MAGI2	0.243692	0.243692	2.34084	0.0340266	0.997664	-3.92706
NEURL1B	0.274012	0.274012	2.3399	0.0340883	0.997664	-3.92764
ZNF404	0.25785	0.25785	2.33826	0.0341964	0.997664	-3.92866
PHKA2	0.313785	0.313785	2.33638	0.0343196	0.997664	-3.92981
ZSWIM5P3	0.256994	0.256994	2.33636	0.034321	0.997664	-3.92983
MICF	0.292871	0.292871	2.33529	0.0343915	0.997664	-3.93049
OTOP1	0.248812	0.248812	2.33199	0.0346107	0.997664	-3.93252
YRDCP2	0.261311	0.261311	2.32874	0.034827	0.997664	-3.93452
CORO1B	0.228406	0.228406	2.32848	0.0348444	0.997664	-3.93468
ARHGEF11	0.285714	0.285714	2.32783	0.0348877	0.997664	-3.93508
LY6G6D	0.450064	0.450064	2.32651	0.0349765	0.997664	-3.9359
WDR88	0.21227	0.21227	2.32615	0.0350007	0.997664	-3.93612
STAG3	0.238448	0.238448	2.3248	0.0350913	0.997664	-3.93695
FAM124A	0.239421	0.239421	2.3247	0.035098	0.997664	-3.93701
FMO10P	0.24797	0.24797	2.32184	0.0352913	0.997664	-3.93878
ADORA2B	0.294425	0.294425	2.31971	0.0354362	0.997664	-3.94009
EFNA2	0.42145	0.42145	2.31939	0.0354576	0.997664	-3.94029
STAP2	0.312254	0.312254	2.31633	0.0356665	0.997664	-3.94217
C2orf66	0.310254	0.310254	2.31628	0.0356698	0.997664	-3.9422
CTRL	0.265314	0.265314	2.316	0.0356891	0.997664	-3.94238
ERCC2	0.310461	0.310461	2.31556	0.0357189	0.997664	-3.94265
MAP2K7	0.321556	0.321556	2.31483	0.0357694	0.997664	-3.9431
WDR87	0.252931	0.252931	2.31289	0.035902	0.997664	-3.94429
NMUR1	0.292452	0.292452	2.30919	0.0361578	0.997664	-3.94657
ATP7B	0.378943	0.378943	2.30868	0.0361934	0.997664	-3.94689
SPOCD1	0.246251	0.246251	2.30709	0.0363037	0.997664	-3.94787
USP35	0.230328	0.230328	2.30562	0.0364059	0.997664	-3.94877
TAS2R16	0.313449	0.313449	2.30436	0.0364937	0.997664	-3.94954
MBL3P	0.220687	0.220687	2.3015	0.0366941	0.997664	-3.95131
ALDOC	0.18397	0.18397	2.30052	0.036763	0.997664	-3.95191
GPR79	0.224743	0.224743	2.30026	0.0367814	0.997664	-3.95207
SUMO1P1	0.269079	0.269079	2.29941	0.0368413	0.997664	-3.95259
GGNBP1	0.22376	0.22376	2.2983	0.0369196	0.997664	-3.95328
ZNF831	0.247132	0.247132	2.2977	0.0369621	0.997664	-3.95365
SYNE4	0.321634	0.321634	2.29472	0.0371732	0.997664	-3.95548
PFKP	0.222879	0.222879	2.29451	0.0371885	0.997664	-3.95561
FBXL19-AS1	0.246578	0.246578	2.29337	0.0372697	0.997664	-3.95631
LONRF2	0.241451	0.241451	2.292	0.0373675	0.997664	-3.95716
OR7E90P	0.214544	0.214544	2.29139	0.0374107	0.997664	-3.95753
PGRMC1	0.316712	0.316712	2.28862	0.0376092	0.997664	-3.95923
BLACAT1	0.261743	0.261743	2.28715	0.0377156	0.997664	-3.96014
GGA1	0.26897	0.26897	2.28645	0.0377656	0.997664	-3.96057
CCDC71	0.288657	0.288657	2.28511	0.0378626	0.997664	-3.96139
HAO2	0.294018	0.294018	2.28488	0.0378795	0.997664	-3.96154
MAPK12	0.187022	0.187022	2.28478	0.0378866	0.997664	-3.9616
PNKP	0.201786	0.201786	2.28471	0.0378914	0.997664	-3.96164
HCP5	0.181242	0.181242	2.2845	0.037907	0.997664	-3.96177
SUN3	0.354742	0.354742	2.28399	0.0379436	0.997664	-3.96208
SPDYE12P	0.213442	0.213442	2.28358	0.0379734	0.997664	-3.96233
NSMCE1	0.270222	0.270222	2.28331	0.0379927	0.997664	-3.9625
NFE2L3	0.39931	0.39931	2.28151	0.038124	0.997664	-3.96361
CDH15	0.28544	0.28544	2.27892	0.0383126	0.997664	-3.9652
TM2D2	0.313684	0.313684	2.27869	0.0383297	0.997664	-3.96534
RELB	0.296442	0.296442	2.27782	0.038393	0.997664	-3.96587
TNNI2	0.229402	0.229402	2.27646	0.0384931	0.997664	-3.96671
RNF224	0.229004	0.229004	2.27511	0.0385926	0.997664	-3.96754
CSF1R	0.215519	0.215519	2.27467	0.0386248	0.997664	-3.96781
ZNF324B	0.221612	0.221612	2.27423	0.0386576	0.997664	-3.96809
EGFL6	0.243439	0.243439	2.27414	0.0386644	0.997664	-3.96814
RTP4	0.20654	0.20654	2.27373	0.0386945	0.997664	-3.96839
SH3GL1P1	0.226476	0.226476	2.27137	0.0388689	0.997664	-3.96984
MPZL3	0.232549	0.232549	2.27124	0.0388785	0.997664	-3.96992
SFRP5	0.228856	0.228856	2.26991	0.0389776	0.997664	-3.97074
C16orf92	0.234859	0.234859	2.26933	0.0390203	0.997664	-3.9711
RARRES2P7	0.228095	0.228095	2.2688	0.0390598	0.997664	-3.97142
OR10V2P	0.201745	0.201745	2.26662	0.0392223	0.997664	-3.97276
MRPL20P1	0.202441	0.202441	2.26629	0.0392475	0.997664	-3.97297
C9orf50	0.290387	0.290387	2.2629	0.0395016	0.997664	-3.97505
DUSP23	0.255017	0.255017	2.26234	0.0395436	0.997664	-3.97539
SNORD91B	0.371882	0.371882	2.26176	0.0395876	0.997664	-3.97575
FAM218BP	0.240391	0.240391	2.25884	0.0398088	0.997664	-3.97755
OXCT1-AS1	0.214066	0.214066	2.25727	0.039928	0.997664	-3.97851
C11orf87	0.227221	0.227221	2.25543	0.0400676	0.997664	-3.97964
LRRC61	0.204946	0.204946	2.25524	0.0400822	0.997664	-3.97975
SNORA71B	0.2243	0.2243	2.25357	0.0402101	0.997664	-3.98078
RPS3AP53	0.206618	0.206618	2.25208	0.040324	0.997664	-3.98169
SCRT1	0.337567	0.337567	2.25098	0.0404086	0.997664	-3.98237
RPL26P34	0.279905	0.279905	2.24988	0.0404936	0.997664	-3.98305
EPN3	0.292449	0.292449	2.24913	0.0405513	0.997664	-3.98351
RPL39P25	0.310651	0.310651	2.24802	0.0406367	0.997664	-3.98419
CTBP2P6	0.279362	0.279362	2.24678	0.0407328	0.997664	-3.98495
LAGE3	0.263864	0.263864	2.24619	0.0407783	0.997664	-3.98531
ASPG	0.207943	0.207943	2.24423	0.0409308	0.997664	-3.98651
IGHVII-44-2	0.251139	0.251139	2.24422	0.0409311	0.997664	-3.98652
TBATA	0.28827	0.28827	2.24382	0.0409627	0.997664	-3.98676
REXO1L9P	0.23453	0.23453	2.24289	0.0410349	0.997664	-3.98733
CHRM3	0.398463	0.398463	2.24199	0.0411058	0.997664	-3.98789
OR56A5	0.368444	0.368444	2.24113	0.0411724	0.997664	-3.98841
FAM156B	0.24842	0.24842	2.24095	0.0411865	0.997664	-3.98852
SAMD1	0.19467	0.19467	2.24087	0.0411931	0.997664	-3.98857
NAT16	0.250513	0.250513	2.24017	0.0412477	0.997664	-3.989
GCOM1	0.285971	0.285971	2.23942	0.0413067	0.997664	-3.98946
LHX1	0.261759	0.261759	2.23936	0.0413115	0.997664	-3.9895
REXO1L2P	0.329876	0.329876	2.23688	0.0415065	0.997664	-3.99102
RRP15	0.232862	0.232862	2.23407	0.0417283	0.997664	-3.99274
SMNDC1	0.297472	0.297472	2.23342	0.04178	0.997664	-3.99314
MPV17L	0.262465	0.262465	2.23319	0.0417984	0.997664	-3.99328
ARMC5	0.23674	0.23674	2.22859	0.0421648	0.997664	-3.9961
PRRT2	0.267649	0.267649	2.2282	0.0421965	0.997664	-3.99635
CDRT15P1	0.208611	0.208611	2.22659	0.0423256	0.997664	-3.99733
ZNF281	0.225383	0.225383	2.22583	0.0423863	0.997664	-3.9978
NUP62CL	0.217842	0.217842	2.22548	0.0424148	0.997664	-3.99801
ACVR2B	0.246975	0.246975	2.22539	0.0424216	0.997664	-3.99807
TATDN2P2	0.259974	0.259974	2.22462	0.0424836	0.997664	-3.99854
POLR2KP1	0.210591	0.210591	2.22399	0.0425346	0.997664	-3.99892
RBP2	0.280378	0.280378	2.22108	0.0427699	0.997664	-4.00071
NBPF10	0.243209	0.243209	2.22025	0.0428374	0.997664	-4.00122
LAMB3	0.232284	0.232284	2.22004	0.042854	0.997664	-4.00134
MCF2L	0.27742	0.27742	2.21876	0.0429583	0.997664	-4.00213
HNRNPA1P18	0.219338	0.219338	2.21841	0.042987	0.997664	-4.00234
RNF43	0.786602	0.786602	2.21817	0.0430066	0.997664	-4.00249
GSTA8P	0.238063	0.238063	2.21735	0.0430732	0.997664	-4.00299
GUCD1	0.230204	0.230204	2.21644	0.0431476	0.997664	-4.00355
CEBPA	0.194817	0.194817	2.21459	0.0432988	0.997664	-4.00468
LILRA5	0.19981	0.19981	2.21415	0.0433354	0.997664	-4.00495
ADAMTSL5	0.179456	0.179456	2.21224	0.0434922	0.997664	-4.00612
TMEM220-AS1	0.197553	0.197553	2.21174	0.0435339	0.997664	-4.00643
DENND1C	0.243091	0.243091	2.2116	0.0435448	0.997664	-4.00651
C5orf49	0.217006	0.217006	2.21085	0.0436073	0.997664	-4.00698
ZBTB12BP	0.288414	0.288414	2.20889	0.0437695	0.997664	-4.00818
PRPH	0.292033	0.292033	2.20756	0.0438796	0.997664	-4.00899
DCP1B	0.257441	0.257441	2.20573	0.044032	0.997664	-4.01011
CFAP52	0.215868	0.215868	2.20553	0.0440483	0.997664	-4.01023
SPINK6	0.18706	0.18706	2.20445	0.0441388	0.997664	-4.01089
FAM8A6P	0.223974	0.223974	2.20384	0.0441897	0.997664	-4.01127
FAM120B	0.31268	0.31268	2.20165	0.0443731	0.997664	-4.01261
CYP11B1	0.198131	0.198131	2.20087	0.0444387	0.997664	-4.01308
CDCA5	0.253669	0.253669	2.20069	0.0444532	0.997664	-4.01319
TSPY13P	0.282838	0.282838	2.1996	0.0445455	0.997664	-4.01386
SPHKAP	0.285839	0.285839	2.19832	0.0446531	0.997664	-4.01464
OR4D2	0.240649	0.240649	2.1983	0.0446545	0.997664	-4.01465
TMEM107	0.231572	0.231572	2.19765	0.0447095	0.997664	-4.01505
SOX17	0.192406	0.192406	2.19753	0.0447203	0.997664	-4.01513
RPIA	0.286586	0.286586	2.19654	0.0448037	0.997664	-4.01573
RPL23AP54	0.248437	0.248437	2.19621	0.0448316	0.997664	-4.01593
BCKDHA	0.213795	0.213795	2.19398	0.0450207	0.997664	-4.01729
CBARP	0.201953	0.201953	2.19317	0.0450895	0.997664	-4.01779
TUBB7P	0.19441	0.19441	2.19304	0.0451009	0.997664	-4.01787
SMUG1	0.237673	0.237673	2.19284	0.0451176	0.997664	-4.01799
CXorf56	0.254412	0.254412	2.19254	0.0451439	0.997664	-4.01818
CETN1	0.299127	0.299127	2.19171	0.0452144	0.997664	-4.01868
FLT1P1	0.250225	0.250225	2.19041	0.0453257	0.997664	-4.01948
NANOS2	0.224472	0.224472	2.18991	0.0453686	0.997664	-4.01979
SEMA3A	0.232093	0.232093	2.1881	0.0455237	0.997664	-4.02089
CHRM3-AS1	0.286869	0.286869	2.18556	0.0457427	0.997664	-4.02244
RPL17P35	0.254517	0.254517	2.18445	0.045838	0.997664	-4.02312
ZNF861P	0.252429	0.252429	2.18391	0.0458854	0.997664	-4.02345
KRT18P67	0.197215	0.197215	2.18332	0.0459366	0.997664	-4.02381
KHDC3L	0.195787	0.195787	2.18293	0.0459702	0.997664	-4.02405
TRIM17	0.222718	0.222718	2.18192	0.0460575	0.997664	-4.02466
TINCR	0.202545	0.202545	2.18186	0.0460626	0.997664	-4.0247
HPX	0.202226	0.202226	2.18177	0.0460707	0.997664	-4.02476
GRIN2B	0.628055	0.628055	2.18172	0.0460749	0.997664	-4.02479
MRPS34	0.164723	0.164723	2.18136	0.046106	0.997664	-4.025
C1QA	0.238662	0.238662	2.18135	0.0461073	0.997664	-4.02501
OR13C1P	0.209542	0.209542	2.17975	0.046247	0.997664	-4.02599
C7orf50	0.229477	0.229477	2.17973	0.0462481	0.997664	-4.026
NCBP3	0.28583	0.28583	2.17937	0.0462795	0.997664	-4.02622
RPS23P10	0.189075	0.189075	2.17928	0.0462879	0.997664	-4.02628
LONRF2P2	0.189087	0.189087	2.17695	0.046491	0.997664	-4.0277
AXIN2	0.681197	0.681197	2.17561	0.0466094	0.997664	-4.02852
SNORD83A	0.335751	0.335751	2.17556	0.0466135	0.997664	-4.02855
GAPDHP53	0.281187	0.281187	2.17494	0.0466679	0.997664	-4.02893
CTSW	0.256822	0.256822	2.1738	0.046768	0.997664	-4.02962
PKLR	0.234738	0.234738	2.17211	0.0469174	0.997664	-4.03066
CORO7	0.253107	0.253107	2.17202	0.0469251	0.997664	-4.03071
SPATA20	0.177856	0.177856	2.17151	0.0469705	0.997664	-4.03102
FRMD8P1	0.219851	0.219851	2.17131	0.046988	0.997664	-4.03114
FAM47C	0.29482	0.29482	2.17019	0.0470875	0.997664	-4.03183
CXorf65	0.211932	0.211932	2.16993	0.0471105	0.997664	-4.03199
TSPY26P	0.303141	0.303141	2.16921	0.0471744	0.997664	-4.03243
NHP2	0.217406	0.217406	2.16782	0.0472979	0.997664	-4.03327
XKRYP4	0.202667	0.202667	2.16776	0.0473037	0.997664	-4.03331
CNTN4-AS2	0.287008	0.287008	2.16726	0.0473477	0.997664	-4.03361
PIGC	0.239352	0.239352	2.16398	0.0476409	0.997664	-4.03561
POU5F1P4	0.241498	0.241498	2.16389	0.0476492	0.997664	-4.03567
LRRN2	0.275079	0.275079	2.16343	0.0476905	0.997664	-4.03595
SLA	0.179872	0.179872	2.16339	0.0476941	0.997664	-4.03598
CPLX2	0.305417	0.305417	2.16203	0.0478165	0.997664	-4.03681
TP53I13	0.198288	0.198288	2.15992	0.0480068	0.997664	-4.03809
XAGE5	0.282005	0.282005	2.15957	0.0480385	0.997664	-4.03831
DUX4L26	0.26268	0.26268	2.15907	0.0480832	0.997664	-4.03861
AQP12A	0.21079	0.21079	2.15907	0.0480837	0.997664	-4.03861
BOP1	0.221025	0.221025	2.15889	0.0480992	0.997664	-4.03872
KRT31	0.216158	0.216158	2.15643	0.0483223	0.997664	-4.04022
WDR13	0.202439	0.202439	2.1537	0.0485715	0.997664	-4.04188
C6orf163	0.278045	0.278045	2.15341	0.0485975	0.997664	-4.04206
DPEP3	0.236817	0.236817	2.15318	0.0486187	0.997664	-4.0422
TMEM179	0.249706	0.249706	2.15291	0.0486437	0.997664	-4.04237
ZNF211	0.217225	0.217225	2.15268	0.0486643	0.997664	-4.0425
TTTY7B	0.233268	0.233268	2.1516	0.0487635	0.997664	-4.04316
RPE	0.310075	0.310075	2.15132	0.0487894	0.997664	-4.04334
CCR8	0.266849	0.266849	2.15085	0.0488317	0.997664	-4.04362
CLPTM1L	0.32911	0.32911	2.14878	0.0490219	0.997664	-4.04488
[truncated: 26,768 more rows]

## Sheet: SE
Gene	logFC	AveExpr	t	P.Value	adj.P.Val	B
[truncated: 27,302 more rows]

[truncated: 1 more sheets: TB]
