# Supplementary material for: Molecular portraits of colorectal cancer morphological regions
Source: eLife. 2023 Nov 13;12:RP86655. doi: 10.7554/eLife.86655 (PMC10642970; doi:10.7554/eLife.86655)
Supplement: Supplementary file 6. [file elife-86655-supp6.xlsx]

## Sheet: Contents
These tables contain the full GSEA results using MSigDB 7.4.1.
For each morphotype, the 9 sections of MSigDB are saved as separate tables.

## Sheet: CT_H
pathway	pval	padj	ES	NES	nMoreExtreme	size	leadingEdge	Enrichment
ADIPOGENESIS_up	0.00506971	0.0146127	0.358249	1.45765	47	192	MDH2, DNAJC15, PRDX3, ACLY, HIBCH, GRPEL1, DHCR7, DGAT1, PREB, NDUFA5, GPAT4, NDUFAB1, UBQLN1, CYC1, MTCH2, AIFM1, SDHB, CHUK, IDH3G, COX8A, NABP1, PPARG, PTCD3, ALDOA, TALDO1, ETFB, TKT, REEP5, ATL2, UQCRQ, CMPK1, ADIPOR2, SOD1, DDT, SDHC, TOB1, COQ3, AK2, PFKL, IMMT, MRPL15, UBC, SLC19A1, LIPE, DNAJB9, CS, AGPAT3, ALDH2, SLC1A5, SLC5A6, IDH1, DRAM2, UQCR10, STAT5A, MAP4K3, SLC25A10, GHITM, DECR…	Up-regulated
ALLOGRAFT_REJECTION_up	0.918251	0.957325	0.189028	0.76925	8693	193	ABCE1, BRCA1, CDKN2A, MMP9, CD47, RPL39, RIPK2, EIF3J, NPM1, TAP1, NME1, RPS9, B2M, EIF5A, BCL10, GCNT1, CXCL9, ABI1, CD7, PSMB10, F2, IL1B, RPL9, HLA-G, INHBA, ITGAL, CSK, UBE2D1, MRPL3, RPS19, RPS3A, EGFR, EREG, SOCS1, PF4, IRF7, NOS2, TPD52, CD3E, IL27RA, EIF3D, DEGS1, NLRP3, STAT1, C2, IL9, MTIF2, CAPG, TLR2, LYN	Up-regulated
ANDROGEN_RESPONSE_up	0.0336451	0.0611735	0.369183	1.39983	294	97	SCD, PA2G4, SORD, UBE2I, CENPN, INSIG1, DBI, STK39, XRCC6, KRT8, CDC14B, B2M, ANKH, CDK6, IDI1, XRCC5, PGM3, SLC38A2, HMGCR, CCND1, TMPRSS2, ADRM1, AZGP1, HMGCS1, ELK4, KRT19, DNAJB9, ARID5B, SMS, SRP19, NDRG1, PIAS1, HSD17B14, LMAN1, RRP12, ACSL3, TPD52, MAK, NGLY1, MAP7, TMEM50A, PMEPA1, TSC22D1	Up-regulated
ANGIOGENESIS_up	0.286851	0.379884	-0.278221	-1.09467	684	36	FSTL1, SLCO2A1, NRP1, FGFR1, KCNJ8	Down-regulated
APICAL_JUNCTION_up	0.576615	0.650682	0.235698	0.959591	5463	194	CDK8, MVD, TIAL1, PTK2, CDH1, INSIG1, SYK, MMP9, CDH3, ITGA2, MDK, CD274, MAPK13, ICAM5, ITGA9, JUP, BAIAP2, CLDN4, AMH, CLDN18, RHOF, SYMPK, CTNNA1, ITGB4, ADAM15, SLC30A3, SDC3, PLCG1, YWHAH, PFN1, CAP1, ACTN4, RASA1, DHX16, TSPAN4, EGFR, ACTN2, CRB3, ADAM9, ACTB, EPB41L2, CX3CL1, ITGB1, MAP4K2, FSCN1, CLDN14, NLGN3, PTEN	Up-regulated
APICAL_SURFACE_up	0.985998	0.985998	0.168627	0.563657	7745	43	BRCA1, NCOA6, EPHB4, ADIPOR2, ADAM10, PLAUR, CX3CL1, GHRL, HSPB1, LYN	Up-regulated
APOPTOSIS_up	0.272315	0.370651	0.276934	1.10698	2519	158	KRT18, BRCA1, TOP2A, CDK2, PTK2, SC5D, CDC25B, XIAP, ERBB3, PAK1, DNAJA1, TAP1, VDAC2, ANKH, PPP3R1, DNAJC3, HMGB2, WEE1, DAP3, BCL10, CCND1, DNM1L, TSPO, IFITM3, CTNNB1, SOD1, JUN, CASP1, EBP, BTG3, F2, IL1B, GSTM1, CASP2, TGFBR3, MGMT, IRF1, CASP3, PDGFRB, EREG, LEF1, SQSTM1, GPX1, LGALS3, PPT1, PEA15, SPTAN1, BAX, CTH, BCAP31, CD38, IGF2R, PMAIP1, HSPB1, GNA15, CASP9, GPX3, ATF3	Up-regulated
BILE_ACID_METABOLISM_up	0.565136	0.650682	-0.19514	-0.964807	602	112	ABCA8, NR3C2, ABCA9, FDXR, RETSAT, BMP6, ABCA3, AGXT, SLC23A2, ALDH8A1, CH25H, RXRA, ATXN1, CYP7B1, PIPOX, AR, ABCD2, ABCA2, ABCA5, ABCD3, BCAR3, PEX11G, AQP9, GCLM, OPTN, PEX11A, BBOX1, ABCA4, ABCG8, SULT1B1, FADS2, SLCO1A2, RXRG, DIO2, KLF1	Down-regulated
CHOLESTEROL_HOMEOSTASIS_up	0.00106939	0.00482198	0.467243	1.7018	8	73	TMEM97, SCD, CYP51A1, MVD, NSDHL, MAL2, SC5D, DHCR7, PDK3, S100A11, STARD4, IDI1, PPARG, HMGCR, CTNNB1, FABP5, CD9, CXCL16, SQLE, TRIB3, EBP, GUSB, HMGCS1, PLAUR, ACAT2, FDFT1	Up-regulated
COAGULATION_up	0.0602007	0.0983278	-0.240066	-1.23217	53	138	GSN, CFH, MEP1A, C1QA, RAPGEF3, FBN1, CPQ, MMP2, TF, ANG, F3, CTSK, S100A1, HTRA1, LRP1, THBS1, CLU, FGA, C1R, A2M, SPARC, MASP2, C8G, P2RY1, MAFF, PDGFB, CAPN5, PECAM1, C3, HPN, HMGCS2, TIMP3, SERPINA1	Down-regulated
COMPLEMENT_up	0.341223	0.439998	-0.193064	-1.03579	172	198	CR2, DGKG, DOCK10, CFH, CA2, GNG2, C1QA, CPQ, ZFPM2, KCNIP3, IL6, ANG, F3, CR1, ZEB1, CPM, CP, GNAI2, APOBEC3F, CD40LG, LRP1, S100A9, CLU, C1R, GNGT2, L3MBTL4, CCL5, CDA, CTSC, DYRK2, PIK3R5, KYNU	Down-regulated
E2F_TARGETS_up	0.00010553	0.000753012	0.679889	2.76801	0	194	CKS2, PLK1, CSE1L, PTTG1, EXOSC8, BRCA2, DIAPH3, EZH2, CDKN3, ATAD2, KPNA2, PA2G4, MKI67, E2F8, MELK, AURKA, CDK1, RAD51AP1, NOLC1, USP1, PRIM2, TRIP13, TFRC, BRCA1, RPA3, LYAR, TOP2A, DCTPP1, RFC2, UBE2T, MYC, DUT, CKS1B, GINS1, CENPM, CDKN2A, NOP56, SMC3, SPC25, TMPO, DEK, PLK4, CCNB2, CDC25B, LBR, MTHFD2, CHEK1, SLBP, SRSF2, XPO1, PCNA, STMN1, SSRP1, RAN, TIPIN, SYNCRIP, BIRC5, XRCC6, POLD3, D…	Up-regulated
EPITHELIAL_MESENCHYMAL_TRANSITION_up	0.00194932	0.00644313	-0.432198	-2.31831	0	197	SFRP1, SLIT3, FSTL1, LAMA2, BASP1, ABI3BP, LOXL1, MATN2, FBN1, EMP3, GREM1, CXCL12, GEM, VIM, ACTA2, NID2, IL6, MMP2, SNAI2, DST, TPM4, MAGEE1, RGS4, EFEMP2, HTRA1, ID2, FBLN5, SLIT2, PTX3, TAGLN, MFAP5, ITGB5, RHOB, MGP, PMP22, SCG2, GAS1, LRP1, FAS, FERMT2, GPX7, ANPEP, LGALS1, THBS1, COL6A2, VEGFC, CDH2, TNC, MYLK, LOX, TGFB1, COL5A1, VCAM1, PRRX1, ECM1, SPARC, GJA1, FUCA1, PLOD2, IGFBP4, PCOL…	Down-regulated
ESTROGEN_RESPONSE_EARLY_up	0.524713	0.627096	0.241428	0.983482	4978	196	KRT18, SLC7A5, ARL3, MYC, TPD52L1, CELSR2, MYBBP1A, REEP1, TFAP2C, DHCR7, MYB, KRT8, PPIF, IL17RB, TGIF2, AKAP1, FRK, SLC39A6, RAPGEFL1, SLC19A2, CCND1, SLC16A1, AMFR, ANXA9, FARP1, DYNLT3, TOB1, UNC119, KRT15, SULT2B1, FAM102A, KRT19, CISH, ELF1, MED24, SYBU, AREG, CANT1, DEPTOR, FDFT1, ASB13, CYP26B1, CLIC3, ISG20L2, FOXC1, SFN, RRP12, TSKU, FHL2, LAD1, NXT1, PDZK1, TMEM164, ABLIM1, STC2, LRIG1	Up-regulated
ESTROGEN_RESPONSE_LATE_up	0.0644719	0.101907	0.310721	1.2652	610	195	SLC7A5, PERP, CDC6, STIL, SORD, ARL3, TOP2A, GINS2, CDH1, PLK4, SLC29A1, TPD52L1, CELSR2, TFAP2C, GJB3, DHCR7, KIF20A, MYB, COX6C, MDK, PPIF, IL17RB, ASS1, NMU, MAPK13, LSR, FRK, RAPGEFL1, ETFB, PLXNB1, SNX10, CCND1, SLC16A1, AMFR, ANXA9, FARP1, FABP5, CDC20, UNC13B, DYNLT3, CD9, TOB1, SULT2B1, FAM102A, BTG3, HPRT1, KRT19, CISH, IDH2, AREG, GPER1, MEST, FDFT1, CYP26B1, CLIC3, TRIM29, FOXC1, METTL3	Up-regulated
FATTY_ACID_METABOLISM_up	0.00378133	0.0115803	0.373771	1.49301	34	156	HSPH1, MDH2, NSDHL, CBR1, BPHL, HIBCH, PCBD1, ACSL5, APEX1, IDH3B, PDHA1, IDI1, IDH3G, MDH1, ALDOA, GRHPR, ODC1, HSP90AA1, MIF, HSDL2, S100A10, UBE2L6, UROD, OSTC, ECI1, METAP1, ADIPOR2, CPOX, SDHC, YWHAH, HMGCL, G0S2, CA6, CCDC58, CEL, HMGCS1, SDHD, FH, HSD17B11, SMS, IDH1, ACAT2, ACSM3, CRYZ, AADAT, NTHL1, DECR1, PTS, REEP6, CIDEA, NBN, RDH11, CBR3, HADHB	Up-regulated
G2M_CHECKPOINT_up	0.000105798	0.000753012	0.668253	2.7161	0	189	TFDP1, CKS2, TPX2, PLK1, PTTG1, BRCA2, POLQ, SLC7A5, EZH2, CDKN3, KPNA2, MKI67, SMARCC1, DKC1, CDC6, BUB1, STIL, SLC12A2, AURKA, CDK1, CCNA2, NOLC1, RBL1, TTK, PRIM2, UBE2C, ORC5, SLC7A1, TOP2A, GINS2, MYC, PTTG3P, KIF23, CKS1B, DBF4, RAD54L, AMD1, KIF20B, TMPO, PLK4, CCNB2, CUL4A, CDC25B, LBR, CENPF, CHEK1, SRSF2, XPO1, CCNT1, SFPQ, CUL1, PRC1, CCNF, STMN1, SYNCRIP, E2F1, BIRC5, E2F3, UCK2, GSPT…	Up-regulated
GLYCOLYSIS_up	0.000105319	0.000753012	0.450113	1.83512	0	198	ALG1, MDH2, AURKA, CDK1, GOT2, SLC25A13, MET, NSDHL, TXN, AKR1A1, STMN1, PPIA, KIF20A, HAX1, PGAM1, PDK3, COG2, DEPDC1, AK4, RPE, MDH1, P4HA1, ALDOA, TALDO1, GNPDA1, GLCE, RRAGD, NDUFV3, SLC35A3, MIF, KIF2A, GFPT1, TPI1, STC1, ENO1, GMPPA, RBCK1, B4GALT2, B3GNT3, VLDLR, SOD1, PRPS1, GCLC, SRD5A3, SDHC, SDC3, HOMER1, GUSB, MED24, HS2ST1, MPI, IDH1, NASP, HS6ST2, ARTN, PAXIP1, MXI1, FAM162A, EGFR, …	Up-regulated
HEDGEHOG_SIGNALING_up	0.855792	0.911604	0.227773	0.734508	6515	36	CDK6, ETS2, HEY1, VLDLR, LDB1, ADGRG1, RASA1	Up-regulated
HEME_METABOLISM_up	0.941698	0.961317	0.183235	0.745677	8915	193	TFRC, KDM7A, EIF2AK1, PDZK1IP1, GMPS, SLC11A2, MKRN1, HDGF, CIR1, TCEA1, TOP1, ASNS, ARL2BP, FBXO9, NUDT4, CDC27, UROD, TSPAN5, FBXO7, SDCBP, TFDP2, CPOX, GCLC, RAD23A, MINPP1, RNF123, LAMP2, CTNS, RANBP10, BSG, SLC4A1, EPB41, HBQ1, CTSB, XPO7, MXI1, CDR2, RCL1, VEZF1, HTRA2	Up-regulated
HYPOXIA_up	0.0337079	0.0611735	-0.229713	-1.23041	17	193	B4GALNT2, WSB1, PYGM, CSRP2, MT2A, ZFP36, CA12, TGFB3, FOSL2, IL6, GCNT2, F3, SLC2A5, CITED2, NR3C1, AKAP12, CP, MT1E, PLAC8, NDST1, FOS, PNRC1, LXN, NCAN, TPBG, LOX, PGM1, COL5A1, ETS1, PPARGC1A, SELENBP1, SRPX, ACKR3, DTNA, MAFF, ATP7A, NAGK, PDGFB, GAPDHS, DCN, CXCR4, HEXA, IER3, CAV1, DUSP1	Down-regulated
IL2_STAT5_SIGNALING_up	0.12	0.178182	-0.212361	-1.13952	62	195	CDC42SE2, IL1RL1, CA2, CAPN3, NRP1, ST3GAL4, IKZF2, IL18R1, ITIH5, DRC1, LIF, S100A1, CKAP4, ADAM19, EOMES, CD48, PLPP1, IRF4, RHOB, TIAM1, SWAP70, LRRC8C, PTGER2, ABCB1, BMP2, GPR65, CD83, ECM1, GLIPR2, SOCS2, SMPDL3A, EMP1, MAFF, XBP1, HIPK2, IL1R2, SYT11, IL2RB, CSF1, GABARAPL1, CYFIP1, COL6A1, DHRS3, TNFSF10, TLR7	Down-regulated
IL6_JAK_STAT3_SIGNALING_up	0.584286	0.650682	-0.199306	-0.948328	817	87	IL17RA, CBL, IL18R1, IL6, OSMR, IL1R1, PLA2G2A, STAT3, IL6ST, FAS, TYK2, CD14, A2M, TGFB1, PIK3R5, IL1R2, CSF1	Down-regulated
INFLAMMATORY_RESPONSE_up	0.0239044	0.0509267	-0.227979	-1.22518	11	199	STAB1, SLC4A4, KCNA3, LPAR1, MEP1A, EMP3, GABBR1, HAS2, SLAMF1, IL18R1, IL6, OSMR, F3, CD69, LIF, BDKRB1, CD48, BST2, IL1R1, PTPRE, NFKB1, PDE4B, TPBG, CYBB, CD14, VIP, CMKLR1, AXL, PTGER2, GPR183, CCL5, GCH1, CALCRL, HRH1, PIK3R5, RNF144B, PCDH7, IL2RB, CSF1, ITGA5, ICOSLG, TNFSF10, SPHK1, HPN, IL7R	Down-regulated
INTERFERON_ALPHA_RESPONSE_up	0.00688389	0.0172978	0.405864	1.52986	59	94	PARP12, PNPT1, EPSTI1, CD47, RIPK2, TAP1, B2M, PSME2, NUB1, RNF31, IFITM1, PSMA3, STAT2, UBE2L6, IFITM3, CXCL11, PSMB9, CASP1, LY6E, PARP14, TRIM21, EIF2AK2, ELF1, CMTR1, BATF2, IRF1, ISG15, OASL, GBP4, CXCL10, HELZ2, LAP3, RTP4, IRF7, PARP9, TDRD7, NCOA7, IFI27, OGFR, OAS1, MX1, IFIT3, PROCR	Up-regulated
INTERFERON_GAMMA_RESPONSE_up	0.251976	0.352766	0.27343	1.11385	2390	196	PSMA2, PSMB2, PARP12, PNPT1, EPSTI1, MTHFD2, XCL1, RIPK2, NUP93, CD274, ZNFX1, TAP1, B2M, PSME2, PNP, SRI, METTL7B, RNF31, PSMA3, STAT2, UBE2L6, IDO1, CXCL9, IFITM3, RBCK1, CXCL11, PSMB9, TOR1B, CASP1, LY6E, PARP14, PSMB10, AUTS2, TRIM21, ARID5B, EIF2AK2, LYSMD2, CMTR1, BATF2, HLA-G, IRF1, ISG15, CASP3, ISOC1, OASL, SOCS1, GBP4, CXCL10, HELZ2, LAP3, RTP4, NCOA3, IRF7	Up-regulated
KRAS_SIGNALING_up	0.00591716	0.0161078	-0.24416	-1.30992	2	198	F13A1, ADAMDEC1, CFH, CA2, CPE, GYPC, PRKG2, NRP1, CBL, MPZL2, SERPINA3, LIF, SPARCL1, AKAP12, ANO1, TPH1, ID2, VWA5A, ADGRL4, PIGR, TSPAN7, MAP4K1, ARG1, SEMA3B, TNNT2, GNG11, EPB41L3, KCNN4, GFPT2, PTPRR, CMKLR1, LAPTM5, ABCB1, ETS1, BMP2, SCG5, PRRX1, EMP1, LCP1, PLVAP, FUCA1, PEG3, ITGBL1	Down-regulated
KRAS_SIGNALING_dn	0.00952381	0.0222222	-0.241855	-1.29778	4	195	UGT2B17, RYR2, SGK1, TSHB, WNT16, MYOT, COPZ2, PTPRJ, GDNF, ARPP21, CDH16, CD40LG, YPEL1, NGB, CPB1, AKR1B10, HSD11B2, TCF7L1, NTF3, FGF16, SYNPO, SPTBN2, TGFB2, CCDC106, NR4A2, PTGFR, SLC5A5, KRT1, IRS4, SHOX2, IGFBP2, CD207, PDCD1, THNSL2, RSAD2, TENM2, CPEB3, ATP6V1B1, CACNG1, IFNG, ALOX12B, MTHFR, BMPR1B, ARHGDIG, BTG2, CCR8, INSL5, ITIH3, STAG3, KLK7, CNTFR, RGS11, MAST3, SKIL, OXT, CALCB, P…	Down-regulated
MITOTIC_SPINDLE_up	0.00179155	0.00644313	0.372405	1.5177	16	197	TPX2, ANLN, PLK1, BRCA2, BUB1, AURKA, CDK1, TTK, TOP2A, STAU1, KIF23, SMC3, KIF20B, TUBGCP3, SAC3D1, CCNB2, LRPPRC, CENPF, PRC1, BIRC5, MAPRE1, TUBA4A, CKAP5, SASS6, DLGAP5, CENPJ, ESPL1, FBXO5, KIF11, EZR, KIF2C, CDC27, UXT, ARFGEF1, DOCK2, CD2AP, FARP1, ABI1, RHOF, INCENP, KIF15, YWHAE, ACTN4, SMC4, RFC1, RASA1, NUSAP1, KIF22, PPP4R2, EPB41, RANBP9, BCAR1, ARHGDIA, HOOK3, CEP250, DYNLL2, EPB41L…	Up-regulated
MTORC1_SIGNALING_up	0.000105519	0.000753012	0.580273	2.36278	0	195	TMEM97, CCT6A, PLK1, SCD, SLC7A5, EIF2S2, STIP1, UFM1, CYP51A1, HSPE1, BUB1, AURKA, PSMG1, CACYBP, NUFIP1, SORD, TFRC, PPA1, HSPA9, CYB5B, EEF1E1, SC5D, INSIG1, IFRD1, HSPD1, ACLY, GMPS, DHFR, POLR3G, MTHFD2, CCNF, DHCR7, PPIA, SEC11A, ARPC5L, PRDX1, GGA2, MTHFD2L, TUBA4A, STARD4, YKT6, PSMD13, TCEA1, PSMC2, IDI1, AK4, ASNS, PNP, PSAT1, HSPA4, P4HA1, PSMB5, ALDOA, RRP9, CANX, TOMM40, HMGCR, PITPN…	Up-regulated
MYC_TARGETS_V1_up	0.00010553	0.000753012	0.745806	3.03637	0	194	TFDP1, SERBP1, RPS2, EIF2S2, KPNA2, PA2G4, GLO1, SMARCC1, SNRPB2, HSPE1, GNL3, PTGES3, CCNA2, PSMA2, PSMB2, PSMA7, NOLC1, VDAC1, USP1, GOT2, ABCE1, DDX21, RPS5, CCT5, C1QBP, HSP90AB1, CCT2, SSBP1, SRSF7, MYC, FBL, DUT, RFC4, RSL1D1, SNRPD2, CDK2, CBX3, RNPS1, CCT7, NOP56, PRDX3, LSM7, EXOSC7, PPM1G, IFRD1, HDAC2, HSPD1, ACP1, DEK, NOP16, SRSF2, XPO1, RPL14, PCNA, CUL1, EIF4H, PWP1, RPL18, SNRPA, …	Up-regulated
MYC_TARGETS_V2_up	0.000122941	0.000753012	0.700637	2.45432	0	57	TMEM97, PLK1, PA2G4, NIP7, HSPE1, GNL3, NOLC1, SORD, PES1, DCTPP1, MYC, CBX3, NOP56, HSPD1, NOP16, PLK4, MYBBP1A, WDR43, MRTO4, AIMP2, NPM1, PHB, SRM, UTP20, RRP9, GRWD1, NOC4L, IMP4, SLC29A2, DDX18, CDK4, TFB2M, SUPV3L1, SLC19A1, WDR74, NDUFAF4, UNG	Up-regulated
MYOGENESIS_up	0.00194932	0.00644313	-0.284657	-1.5269	0	197	GSN, LAMA2, HSPB8, PTGIS, PYGM, TNNT1, MYH11, KCNH1, GJA5, WWTR1, IGF1, NCAM1, AEBP1, COX7A1, TAGLN, CSRP3, COL15A1, ITGB5, FHL1, MYBPH, PICK1, FXYD1, TNNT2, FST, ANKRD2, SPDEF, COL6A2, MYLK, CLU, NOTCH1, TGFB1, MYOM1, TNNC1, MEF2C, SPARC, MEF2A, CASQ2, DTNA, ADCY9, GABARAPL2, SORBS3, AK1, CNN3, SPHK1, LSP1, MAPK12, MYOZ1, SGCA, DMPK, SGCD, MYOG, TPM2, KIFC3, CACNG1, SOD3, COL1A1, PSEN2, HRC, CAV…	Down-regulated
NOTCH_SIGNALING_up	0.116121	0.177811	0.417258	1.31428	872	32	PSENEN, CUL1, APH1A, CCND1, RBX1, WNT2, FZD5, NOTCH3	Up-regulated
OXIDATIVE_PHOSPHORYLATION_up	0.00010618	0.000753012	0.536347	2.1743	0	183	MDH2, NDUFA4, PDP1, VDAC1, MRPL11, GOT2, FDX1, HSPA9, PRDX3, POLR2F, TIMM9, ATP6V0B, LRPPRC, COX7A2, MTRF1, NDUFB6, GRPEL1, NDUFA2, MRPS15, NDUFA5, NDUFAB1, SLC25A3, ATP6V0C, COX6C, LDHB, UQCRB, NDUFA6, IDH3B, CYC1, NDUFB2, UQCRH, VDAC2, NDUFS6, AIFM1, PDHA1, UQCRC2, MRPL34, COX11, SDHB, CYCS, IDH3G, COX8A, MDH1, ATP6V1F, VDAC3, NDUFA9, ETFB, ATP6V1C1, NDUFA1, TIMM50, COX5B, ATP6V0E1, MRPS22, TIM…	Up-regulated
P53_PATHWAY_up	0.0441394	0.0772439	0.319506	1.29973	417	191	GPX2, PERP, PVT1, POM121, CDKN2A, NOL8, TPD52L1, PCNA, RPL18, SLC3A2, LDHB, TAP1, RAD51C, TM4SF1, SLC19A2, PLXNB2, S100A10, TPRKB, BAIAP2, RB1, CDKN2AIP, DDB2, ITGB4, CCNK, JUN, CASP1, TOB1, IRAK1, PRMT2, WWP1, TRIB3, ERCC5, HINT1, EPHA2, DNTTIP2, OSGIN1, GM2A, RPS12, RALGDS, IP6K2, BAK1, RNF19B, FAM162A, NDRG1, CCNG1, SERPINB5, SOCS1, BLCAP, ANKRA2, ISCU, POLH, PIDD1, SFN, DEF6, TRAF4	Up-regulated
PANCREAS_BETA_CELLS_up	0.6059	0.659758	-0.228385	-0.919337	1375	40	CHGA, G6PC2, FOXO1, NKX2-2, INSM1, PCSK2, NEUROG3, IAPP, GCG, PAK3, GCK, PKLR, MAFB	Down-regulated
PEROXISOME_up	0.0299842	0.058769	0.366753	1.40177	264	104	SMARCC1, TOP2A, SLC25A19, ACSL5, FIS1, PRDX1, CDK7, IDI1, GSTK1, PEX2, PRDX5, GNPAT, BCL10, TSPO, SOD1, CACNA1B, MSH2, YWHAH, HMGCL, SULT2B1, ITGB1BP1, CEL, SLC25A17, HSD17B11, IDH2, IDH1, FABP6, ISOC1, IDE, SEMA3C, CTPS1, PEX5, RDH11, PEX14, PEX6, ALB, SIAH1, DIO1, CAT, MLYCD, FDPS, CLN8, NR1I2, ACOX1, PEX13, ERCC1, VPS4B, NUDT19, SLC35B2, ALDH9A1, HSD17B4, CTBP1	Up-regulated
PI3K_AKT_MTOR_SIGNALING_up	0.181715	0.261884	0.31125	1.1884	1603	103	CDK1, CDK2, PRKAG1, E2F1, RAC1, YWHAB, ATF1, PRKAR2A, PPP1CA, CFL1, STAT2, RPTOR, MAPK9, CAB39, PAK4, PLCG1, ARF1, CDK4, TRIB3, PFN1, CALR, CAB39L, PTPN11, THEM4, EGFR, MAPK8, ARHGDIA, ACTR2, SQSTM1, SFN	Up-regulated
PROTEIN_SECRETION_up	0.000229148	0.00124758	0.467141	1.76355	1	95	KRT18, STAM, BET1, RER1, YKT6, RAB2A, STX16, COG2, ERGIC3, AP3S1, ARFGEF1, DNM1L, YIPF6, AP2S1, OCRL, ATP1A1, SEC22B, ICA1, SOD1, ARFGEF2, RAB22A, ARF1, LAMP2, ADAM10, TMED2, ATP6V1H, TSG101, VAMP3, SH3GL2, VAMP4, COPB1, USO1, EGFR, RAB14, TOM1L1, ZW10, LMAN1, SEC31A, ARFGAP3, PPT1, CLN5, TMX1, SCAMP3, TPD52, COPB2, SCAMP1, CLCN3, KIF1B, MAPK1, IGF2R	Up-regulated
REACTIVE_OXYGEN_SPECIES_PATHWAY_up	0.0296156	0.058769	0.433511	1.47034	234	47	LAMTOR5, GLRX2, TXN, OXSR1, PRDX1, NDUFA6, STK25, SCAF4, ABCC1, SOD1, GCLC, NDUFS2, MSRA, NQO1, ATOX1, PRDX2, NDUFB4, CAT, TXNRD1, PRDX6, GPX3, G6PD, PRDX4, MGST1, GPX4, GSR, SBNO2, PRNP	Up-regulated
SPERMATOGENESIS_up	0.0591729	0.0983278	0.332735	1.30752	537	133	EZH2, CDKN3, BUB1, SLC12A2, AURKA, CDK1, PSMG1, TTK, RFC4, DBF4, AGFG1, CCNB2, STRBP, CSNK2A2, PRKAR2A, PHKG2, OAZ3, VDAC3, TALDO1, POMC, KIF2C, TSN, CFTR, CHRM4, ZC2HC1C, COIL, TNP2, TNP1, DPEP3, ART3, PARP2, PCSK4, IDE, BRAF, CLPB, MLF1, GRM8, NEK2, TUBA3C, NOS1, TSSK2, MAP7, SIRT1, IFT88, HSPA4L, RAD17, ZPBP	Up-regulated
TGF_BETA_SIGNALING_up	0.470527	0.576396	-0.22847	-0.987207	909	54	SLC20A1, SMAD7, WWTR1, ID2, ID1, NOG, THBS1, ID3, TGFB1, BMP2	Down-regulated
TNFA_SIGNALING_VIA_NFKB_up	0.00197239	0.00644313	-0.262594	-1.40882	0	198	RCAN1, SGK1, TNIP2, ZFP36, GEM, TNFAIP2, KLF9, FOSL2, IL6, F3, CD69, EGR2, LIF, EGR1, ID2, SPSB1, PTX3, MCL1, PLPP3, PTPRE, RHOB, FOSB, IER2, MSC, FOS, PNRC1, IL6ST, NFKB1, PDE4B, NR4A3, PLK2, TNC, GFPT2, GPR183, CCL5, BMP2, GCH1, CD83, NR4A2, KYNU, TNFAIP8, ACKR3, MAFF, CEBPD, CSF1, KDM6B, ICOSLG, SPHK1, IL7R, NR4A1, SERPINB8, IER3, DUSP1	Down-regulated
UNFOLDED_PROTEIN_RESPONSE_up	0.000112473	0.000753012	0.543311	2.08507	0	108	SLC7A5, DKC1, CHAC1, NOLC1, EXOSC2, HSPA9, CKS1B, EIF4A2, NOP56, EIF4EBP1, DDX10, YWHAZ, MTHFD2, PDIA6, PREB, SEC11A, HYOU1, NPM1, IMP3, RPS14, ATF4, ASNS, EIF2S1, DNAJC3, NABP1, PSAT1, SPCS1, BANF1, RRP9, DCP1A, LSM4, YIF1A, SERP1, ALDH18A1, CALR, NHP2, DNAJB9, EIF4A1, TTC37, EXOSC4, NOP14, SSR1, FUS, CEBPB, HSPA5, CNOT6, KHSRP, EIF4A3, ERO1A, SDAD1, SEC31A, KIF5B, STC2, EXOSC1, SLC30A5, PARN, E…	Up-regulated
UV_RESPONSE_up	0.00108249	0.00482198	0.399672	1.59477	9	155	STIP1, NUP58, DDX21, TFRC, GGH, CYB5B, RFC4, CDK2, AMD1, DNAJB1, PPAT, E2F5, GRPEL1, DGAT1, TUBA4A, YKT6, PPIF, EPCAM, DNAJA1, TAP1, STK25, POLR2H, ASNS, ATP6V1F, CYB5R1, ALDOA, EIF5, ATP6V1C1, HSPA13, POLE3, FEN1, UROD, MARK2, AP2S1, GLS, HNRNPU, KLHDC3, RPN1, HTR7, BTG3, BSG, SPR, BAK1, IRF1, TGFBRAP1, PARP2, CASP3, CHRNA5	Up-regulated
UV_RESPONSE_dn	0.0191011	0.0425434	-0.259587	-1.33489	16	139	EFEMP1, LPAR1, PRKAR2B, HAS2, NRP1, SMAD7, KIT, ADGRL2, F3, SNAI2, CITED2, NR3C1, RGS4, ID1, FBLN5, PTPRM, MT1E, PLPP3, CDC42BPA, DBP, PMP22, RXRA, NFKB1, ATXN1, INPP4B, CACNA1A	Down-regulated
WNT_BETA_CATENIN_SIGNALING_up	0.00706033	0.0172978	0.496382	1.64989	54	42	SKP2, MYC, HDAC2, NCSTN, CUL1, WNT1, AXIN2, HEY1, CTNNB1, TCF7, NKD1, LEF1, HDAC11, ADAM17	Up-regulated
XENOBIOTIC_METABOLISM_up	0.46435	0.576396	0.247689	1.00983	4408	198	TMEM97, PTGES3, NFS1, MTHFD1, GART, GSTO1, CBR1, PYCR1, ACP1, BPHL, UPB1, MCCC2, GSS, AHCY, TTPA, NPC1, CYP2S1, SSR3, HNF4A, FBP1, ETS2, CYP2J2, JUP, CYP4F2, ABCC2, HGFAC, GCLC, DDT, SLC6A6, PGD, EPHA2, PSMB10, DDC, HPRT1, ARG2, LEAP2, ALDH2, SLC1A5, IDH1, DHRS1, NQO1, PTS, BCAR1, HSD11B1, CYB5A, PTGR1, FMO3, TPST1, CCL25, TMBIM6	Up-regulated

## Sheet: CT_C1
pathway	pval	padj	ES	NES	nMoreExtreme	size	leadingEdge	Enrichment
chr10p12_up	0.465564	0.750722	0.273047	1.00445	3967	77	STAM, PDSS1, RPSAP10, ARMC4P1, RAB18, WAC, ACBD5, ARHGAP21, YWHAZP3, MSRB2, ABI1, YME1L1, ARL5B, HIRAP1, MASTL, ST8SIA6-AS1, LYZL1, PTF1A, THNSL1, LRRC37A6P, UBE2V2P1, KIAA1217, HACD1, ST8SIA6, PTCHD3, NEBL, PRTFDC1, MALRD1, WAC-AS1, MLLT10, BAMBI	Up-regulated
chr10p13_up	0.197918	0.508525	0.365553	1.21018	1539	41	HSPA14, SNRPGP5, MCM10, SUV39H2, RPP38, SEPHS1, PPIAP30, OR7E26P, RPL5P25, TRDMT1, GAPDHP45, CUBN, OR7E115P, FAM171A1, FRMD4A	Up-regulated
chr10p14_up	0.339363	0.620681	0.365449	1.10166	2513	26	CDC123, NUDT5, USP6NL, DHTKD1, HSP90AB7P, PROSER2, ECHDC3, SEC61A2, CUX2P1	Up-regulated
chr10p15_up	0.134282	0.413409	0.386034	1.28326	1046	42	ANKRD16, GDI2, IDI1, SDCBPP1, AKR1C8P, AKR1C5P, LARP4B, AKR1E2, ASB13, PRKCQ-AS1, PFKFB3, GTPBP4, CALML5, AKR1C3, AKR1C4, UCN3, KLF6, RBM17, PITRM1	Up-regulated
chr10q11_up	0.939672	0.997676	0.184997	0.713582	8410	111	BMS1, RPL23AP61, ARHGAP22, PGGT1BP1, FAM170B-AS1, EIF3LP2, RHEBP2, RBP3, TIMM23, ZNF487, ZNF37BP, PARG, RASGEF1A, ANTXRL, MAPK8, HNRNPF, ZNF239, ZNF488, BMS1P7, TIMM23B, FAM25G, FAM25C, ZNF22, SGMS1-AS1, BEND3P1, CCNYL2, OR13A1, ANKRD30BP3, CSGALNACT2, CEP164P1, AGAP4, SLC9A3P1, FAM21EP, CCDC58P2, ARHGAP22-IT1, AGAP9, FAM170B, PARGP1, HNRNPA1P33, FAM21FP, RET, ASAH2B, C10orf53, AGAP10P	Up-regulated
chr10q21_up	0.209134	0.510681	0.323495	1.1775	1762	72	TFAM, CDK1, DBF4P1, ANXA2P3, RPL12P8, IPMK, HNRNPH3, DNA2, CISD1, TMEM14DP, PRELID1P3, HERC4, COX20P1, TPT1P10, CCAR1, POU5F1P5, ARID5B, UBE2D1, MTRNR2L5, MRPL50P4, LRRTM3, CCDC6	Up-regulated
chr10q22_up	0.0499244	0.224287	0.328889	1.31097	461	149	ADK, TMEM254, DDX21, STOX1, PPA1, TYSND1, POLR3A, PCBD1, RPS24, PPIF, RPL39P25, PPIAP13, VDAC2, NUTM2B-AS1, DNAJB12, SPOCK2, P4HA1, C10orf55, PPP3CB, ANAPC16, DDX50, AP3M1, ANXA7, ZNF503-AS1, NPM1P24, VPS26A, ASCC1, SEC24C, SUPV3L1, EIF5AP4, MBL3P, FAM149B1, TSPAN15, DNAJC9, EIF5AL1, ZMIZ1-AS1, COX6CP15, CTSLP6, SAR1A, RPS12P18, ZNF503-AS2, MTCO1P23, SYNPO2L, SLC29A3, EIF4EBP2, DLG5, MRPS16, RPL2…	Up-regulated
chr10q23_up	0.673749	0.886873	0.229847	0.906245	6151	136	SRP9P1, CEP55, EIF2S2P3, ATAD1, ANKRD22, KIF20B, RPL7AP8, SNRPD2P1, CYP2C58P, PANK1, KIF11, RPP30, NHP2P1, NUTM2A-AS1, NOC3L, FRA10AC1, HELLS, PIPSL, GLUD1, RPS3AP5, MINPP1, HTR7, XRCC6P1, SH2D4B, TSPAN14, CDHR1, RAB11AP1, EXOC6, GHITM, IDE, CTBP2P2, FGFBP3, BMPR1A, STAMBPL1, CYP26A1, PTEN, KRT8P38, ADIRF-AS1, LIPA, TBC1D12, OPN4, MTND4P20, CCSER2, IFIT3, RPL12P29, SLC35G1	Up-regulated
chr10q24_up	0.00513381	0.0509432	0.379796	1.50335	46	142	SCD, HPS6, NOLC1, ARL3, DNMBP, RPL7P36, PAX2, NPM3, RPL23AP58, CCNJ, PGAM1, DPCD, SFXN2, CHUK, TM9SF3, CUTC, PCGF6, TCTN3, RPARP-AS1, ERLIN1, ABCC2, ZNF518A, PITX3, ZFYVE27, LDB1, OLMALINC, ALDH18A1, CALHM3, FRAT2, KCNIP2-AS1, NKX2-3, COX15, RPL13AP5, PHBP9, ACTR1A, SLK, NEURL1-AS1, NPM1P26, SFXN3, DNMBP-AS1, NPM1P25, TAF5, BORCS7, RRP12, ST13P13, FRAT1	Up-regulated
chr10q25_up	0.177402	0.486913	0.326959	1.20277	1511	77	GSTO1, SMC3, SFR1, DCLRE1A, TRUB1, RPL23AP59, ACSL5, PLEKHS1, HMGB3P5, VTI1A, YWHAZP5, SORCS3-AS1, RPL13AP6, SORCS3, GSTO2, HSPA12A, ENO4, PNLIPRP2, ZDHHC6, UBE2V1P5, MXI1, NHLRC2, ADD3-AS1, CCDC186	Up-regulated
chr10q26_up	0.0102185	0.0732326	0.364114	1.446	93	144	SEC23IP, MKI67, TXNP1, TIAL1, RPS15AP5, BCCIP, PRDX3, GLRX3, PDZD8, CACUL1, MCMBP, PSTK, RPL23AP60, PHACTR2P1, IKZF5, FAM204A, RPL5P28, ALDOAP2, BUB3, SNORA19, OAT, CASC2, PRAP1, BUB1P1, CLRN3, NSMCE4A, NACAP2, OR6L2P, RPS10P18, C10orf120, ZNF511, MGMT, PWWP2B, RARRES2P2, DUX4L24, DUX4L22, DUX4L10, DUX4L13, CFAP46, BANF1P2, GPR26, RAB11FIP2, NPM1P31, VENTX, DOCK1, SFXN4, FRG2B, GRK5, CTBP2, DUX4L…	Up-regulated
chr11p11_up	0.991914	0.999897	0.160248	0.615214	8831	107	FNBP4, CKAP5, MDK, MTCH2, TYRL, OR4C13, CHRM4, DDB2, GTF2IP11, PTPMT1, F2, RPL23AP63, DGKZ, C11orf49, KBTBD4, ARFGAP2, CELF1, OR4S1, HSD17B12, AMBRA1, TRIM51CP, NUP160, OR4A19P, PRDM11, SLC39A13, CD82, OR4C5, PHF21A, EXT2, OR4C10P, OR4C4P, OR4C9P, OR4A48P, YPEL5P2, C11orf94	Up-regulated
chr11p14_up	0.0784314	0.269804	0.44134	1.38575	591	31	CCDC34, CBX3P1, FANCF, KIF18A, GAS2, SVIP, SLC17A6, HSP90AA2P, RPL7AP58	Up-regulated
chr11q12_up	0.953675	0.999897	0.180423	0.75281	9263	273	SNORD22, MRPL16, OR10Q2P, PATL1, SSRP1, SLC3A2, TMX2, YPEL4, POLR2G, SLC15A3, SNORA57, INTS5, C11orf98, EEF1G, UBE2L6, TMEM258, FEN1, TIMM10, MS4A18, GANAB, OR6Q1, CYB561A3, INCENP, ZP1, TMEM223, CPSF7, OR5AN1, SLC25A47P1, STX3, SCGB1D2, RPS4XP13, WDR74, TMEM132A, GLYAT, OR4D8P, SDHAF2, OR10V1, DDB1, OR9G2P, MTA2, HNRNPUL2, OR5M11, SNORD27, OR9I3P, SLC43A1, OR5A2, ZBTB3, OR5L2, BTBD18, VWCE, OR5A…	Up-regulated
chr11q13_up	0.199714	0.508525	0.268005	1.1248	1951	305	STIP1, CDCA5, MRPL11, TRMT112, DGAT2, SAC3D1, PPME1, PPP1R14B, MRPL48, SHANK2, DHCR7, POLD3, KCNE3, RPS3, COX8A, SHANK2-AS1, BANF1, PPP1CA, CFL1, BAD, MRPL21, PRDX5, STARD10, RPL37P2, CCND1, SPCS2, RBM14, UNC93B1, RAB6A, MARK2, PGM2L1, ENPP7P7, GDPD5, SLC29A2, SNORD15B, YIF1A, DPF2, HIGD1AP10, TMEM151A, FKBP2, OTUB1, GPR137, OR7E11P, ALG1L8P, ZFPL1, KAT5, FOLR2, BATF2, IFITM9P, KRTAP5-11, NDUFS8,…	Up-regulated
chr11q14_up	0.848831	0.960519	0.207972	0.786983	7439	95	CHORDC1, TUBAP2, TMEM126A, NARS2, ARL6IP1P3, ALG8, PAK1, TMEM126B, CLNS1A, GAPDHP70, FTH1P16, CCDC90B	Up-regulated
chr11q22_up	0.816891	0.945103	0.218713	0.790137	6847	68	FDX1, DDX10, MMP12, DCUN1D5, TMEM123, AASDHPPT, CASP1P1, MMP3, CASP1, YAP1, RPSAP50, CUL5, MMP1, MTND2P26	Up-regulated
chr11q23_up	0.592506	0.839926	-0.185834	-0.956298	505	139	LAYN, CBL, NXPE2, MPZL2, NCAM1, DIXDC1, SCN2B, NXPE1, CLDN25, TAGLN, MRPS36P4, BACE1, NXPE4, TECTA, TBCEL, PDZD3, PLET1, UPK2, DUXAP5, PHLDB1, KCTD9P4, ALG9-IT1, TREH, DDX6, COLCA1, HSPE1P18, RPS4XP12	Down-regulated
chr11q24_up	0.00545852	0.0521591	-0.279995	-1.42238	4	129	VSIG2, BARX2, SLC5A4P1, RPL31P47, ST3GAL4, OR10D5P, KCNJ1, KCNJ5, CLMP, OR10S1, VWA5A, OR8X1P, OR8Q1P, OR8B1P, PATE2, DDX25, FEZ1, OR8G1, ETS1, PPP1R10P1, KIRREL3-AS2, CRTAM, OR10D1P, ZNF202, OR8G3P, OR10G8, OR8B5P, SCN3B, ACRV1, ADAMTS8, FLI1, UBASH3B, TMEM225, OR10G5P, SLC37A2, OR8B12, TP53AIP1, BLID, OR8G5, OR6T1, OR8B7P	Down-regulated
chr11q25_up	0.695713	0.892891	0.302755	0.838574	4933	18	THYN1, OPCML, NCAPD3, B3GAT1, VPS26B, NTM, PTP4A2P2, OPCML-IT2, GLB1L2, NTM-AS1	Up-regulated
chr12p11_up	0.752977	0.922631	0.242514	0.821103	5943	46	RPL12P32, YARS2, SNORA75, DNM1L, FAR2, OVCH1-AS1, ARNTL2	Up-regulated
chr12p12_up	0.590122	0.839926	-0.203809	-0.949495	919	74	RERGL, LRRC34P1, DERA, TIMM17BP1, ST8SIA1, KCNJ8, ARHGDIB, MGP, SLC15A5, IAPP, RASSF8, LMO3, BHLHE41, RECQL, SOX5, KRAS, SPX, ABCC9	Down-regulated
chr12p13_up	0.994417	0.999897	0.160259	0.665234	9618	248	PLBD1, RAD51AP1, ZNF384, FAM86FP, COPS7A, MRPL51, MANSC1, EMG1, MLF2, RPS4XP14, CACNA2D4, CLEC4A, CHD4, NDUFA9, SNORA75, PRMT8, PIANP, TULP3, TPI1, RPL13AP20, ALG1L10P, OR7E148P, ADIPOR2, CD9, NIFKP3, GPRC5A, FAM138D, NCAPD2, YBX3, STX8P1, HTR7P1, CCDC77, APOLD1, MAGOHB, PTMAP4, HSPA8P5, SMIM10L1, GAPDH, HSPE1P12, PEX5, RPL21P136, WNK1, RPS3AP43, CLEC4D, C1RL-AS1, PRB3, DDX55P1, OTUD4P1, PLEKHG6,…	Up-regulated
chr12q12_up	0.136879	0.413409	-0.316201	-1.25468	313	37	CPNE8, PDZRN4, SLC2A13, NELL2, LRRK2, PRICKLE1, PLEKHA8P1, ABCD2, C12orf40, MTND1P24, CLUHP8	Down-regulated
chr12q13_up	0.568625	0.837354	0.231614	0.973495	5563	314	KRT18, PA2G4, PTGES3, CDK2, NABP2, CCNT1, SLC11A2, ERBB3, LETMD1, SPRYD4, PRKAG1, COPZ1, TUBA1B, KRT8, WNT1, PMEL, BCDIN3D, ATF1, PRIM1, WNT10B, LARP4, TROAP, SMAGP, RHEBL1, ESPL1, SLC38A2, METTL7B, SNORA2C, STAT2, RPAP3, TUBA1C, PIP4K2C, SLC26A10, HNRNPA1, HIGD1AP1, KRT83, SLC38A1, HOXC-AS1, MYL6B, RPS26, AMHR2, OR9K2, CS, KMT2D, EIF4B, CERS5, ANKRD52, NEMP1, GALNT6, PFDN5, RPL41, MARK3P1, OR10A…	Up-regulated
chr12q14_up	0.480389	0.765063	0.279554	0.990844	3955	60	KRT18P60, RPL14P1, RPL21P104, TSPAN31, RPL32P26, PABPC1P4, CDK4, GAPDHP44, LLPH, RPS6P22, CAND1, RASSF3, RPSAP52, LEMD3, METTL1, RPL21P18, GGTA2P, GNS, LRIG3	Up-regulated
chr12q15_up	0.933124	0.9971	0.205228	0.659417	7129	35	CCT2, RPSAP12, YEATS4	Up-regulated
chr12q21_up	0.795851	0.931175	0.220366	0.812634	6790	79	BBS10, CCDC59, ATXN7L3B, RPL21P106, RPL7P38, RAB21, C12orf29, PAWR, LGR5, POC1B, RPL6P25, MRPS6P4, E2F7, KRR1, NAP1L1, MYF6, MKRN9P, TBC1D15, PHLDA1, NOP56P3	Up-regulated
chr12q22_up	0.24622	0.545556	0.390806	1.1781	1823	26	METAP2, CEP83, NDUFA12, NUDT4, MRPL42, EEA1, LSM3P2, RPL41P5	Up-regulated
chr12q23_up	0.541767	0.822211	0.255143	0.963421	4740	93	PARPBP, C12orf45, TMPO, PWP1, HSPE1P4, RPS4XP1, SLC25A3, KRT18P20, SNRPF, EEF1B2P4, UTP20, RPS27P23, C12orf75	Up-regulated
chr12q24_up	0.202413	0.508525	0.270829	1.12812	1962	261	HMGA1P3, RPL21P1, GATC, RPS2P5, MLEC, RPL12P33, VPS29, PPP1CC, ACAD10, RPL29P24, RAN, RPL7AP60, EP400, TMEM120B, RPL22P19, MAPKAPK5, DENR, CIT, RPL6, KSR2, ZNF664, MSI1, TMEM233, TMEM116, PGAM5, PXMP2, RPLP0, NOC4L, RHOF, UBA52P7, MPHOSPH9, FBXO21, TESC, ANAPC7, SLC15A4, SDS, UBC, TMED2, SPPL3, BRI3BP, PTPN11, ANKRD13A, FAM222A-AS1, RPL31P49, ALDH2, NME2P1, USP30, RNF34, UNG, P2RX7, SFSWAP, FBRSL…	Up-regulated
chr13q12_up	0.00021554	0.00926824	0.426728	1.70625	1	155	HSPH1, MIPEP, CDK8, RPL21, SNORD102, SAP18, SKA3, POMP, NUP58, RNF6, HMGB1, POLR1D, SLC7A1, RPS7P10, RPSAP54, GTF3A, XPO4, PABPC3, MRPL57, USP12, MTIF3, TIMM8BP1, MIPEPP3, RASL11A, RPL7AP73, CENPJ, EIF4A1P7, ZMYM5, RPS12P23, MTMR6, CENPIP1, PAN3, USPL1, PARP4, CDX2, ZDHHC20, LNX2, PSPC1	Up-regulated
chr13q13_up	0.191432	0.506026	0.343481	1.2067	1563	57	EXOSC8, BRCA2, UFM1, ALG5, PROSER1, RFXAP, RFC3, SUPT20H, EIF4A1P5, N4BP2L2-IT2, NHLRC3, N4BP2L2	Up-regulated
chr13q14_up	0.00010805	0.00557536	0.505367	2.01515	0	150	NAA16, NUFIP1, DLEU2, DNAJC15, SUGT1, CKAP2, EBPL, GPALPP1, EPSTI1, ESD, MRPS31, MTRF1, GTF2F2, AKAP11, WBP4, SPRYD7, FABP5P2, MED4, DLEU1, PSME2P2, COX17P1, RAC1P3, ST13P4, SETDB2, KBTBD6, RCBTB1, VPS36, NEK3, DGKZP1, CCDC122, RPL36P19, TPT1-AS1, RB1, KPNA3, ATP7B, KBTBD7, PPIAP26, COG6, RGS17P1, ZC3H13, TRIM13, RPL34P26, VWA8, COX7CP1, RPL13AP25, CALM2P3, CAB39L, SNORA31, PHF11, INTS6, LRCH1, E…	Up-regulated
chr13q22_up	0.044935	0.210786	0.454556	1.4523	341	34	UCHL3, KLF5, TBC1D4, LMO7, COMMD6, RPL7P44, BTF3P11, FABP5P1, MYCBP2	Up-regulated
chr13q31_up	0.571218	0.837354	-0.22349	-0.946028	1162	49	SLITRK6, HIGD1AP2, GPC6, TXNL1P1, DDX6P2, ARF4P4, FAR1P1, GPC6-AS1, DPPA3P3, RPL7L1P1, NDFIP2-AS1, GRPEL2P1, HNRNPA1P29, GPC5-IT1, GPC5, FABP5P4, TRIM60P13, MOB1AP1, HNRNPA1P31, NIPA2P5	Down-regulated
chr13q32_up	0.0367824	0.184503	0.399535	1.42945	304	64	GPR180, UGGT2, TM9SF2, TGDS, DOCK9, GAPDHP22, MBNL2, DNAJC3, TMTC4, STK24, UBAC2, FARP1, MTND5P2, IPO5, RPL21P112, CLYBL, MTCYBP3, BRD7P5, HSP90AB6P, ZIC5, ZIC2, RPL15P18, RPS6P23, RNF113B, DCT	Up-regulated
chr13q33_up	0.0604388	0.232735	0.443191	1.41599	459	34	TPP2, RPL7P45, BIVM-ERCC5, ABHD13, BIVM, ARGLU1, NALCN, TEX30	Up-regulated
chr14q11_up	0.00228311	0.0318519	-0.267676	-1.45057	0	212	TRDJ2, TRAJ5, TRAV25, OR11H12, OR4K5, TRAJ56, TRAJ10, TRAV9-1, TRAV36DV7, OR4K17, ANG, TRAJ23, TRAV11, TRAJ45, OR11G2, TRAV1-1, TRAJ35, METTL17, TRAJ55, OR4K3, TRDJ3, TRAV32, TRAV23DV6, OR4N2, TRAJ16, IL25, TRAJ33, TRAV34, OR6E1P, TRAJ36, TRAJ41, TRDV3, RPGRIP1, ARHGEF40, TRAJ30, TRAV3, TRAJ13, TRAV15, TRAV28, OR11H7, SNORD9, TRAJ14, TRAV10, SLC39A2, TRAJ47, DHRS4L2, TRAJ19, CPNE6, TRAV2, TRAV19,…	Down-regulated
chr14q12_up	0.0563626	0.227212	-0.292739	-1.31931	96	63	ADCY4, NOVA1, CMA1, HEATR5A, SYF2P1, NFATC4, CTSG, TSSK4, NRL, SDR39U1, TINF2, RPL12P5, FOXG1, SCFD1, RIPK3, PRKD1, KHNYN, STRN3, GPR33	Down-regulated
chr14q13_up	0.275272	0.563738	0.336407	1.13901	2172	46	RPL9P3, BAZ1A, RPL12P6, RPL23AP71, PSMA6, PPP2R3C, SRP54, RPS3AP4, RPS19P3, BRMS1L, NUTF2P2, SLC25A21-AS1, SPTSSA, RPL23AP8, NKX2-8, ILF2P2, MBIP, SNX6, RPL29P3, CFL2, PHKBP2	Up-regulated
chr14q21_up	0.579222	0.839547	-0.225907	-0.943135	1220	46	RPL10L, SOS2, FBXO33, DOCK11P1, FSCB, RPL7AP2, LRFN5, MGAT2, SNORD127	Down-regulated
chr14q22_up	0.908586	0.991061	0.199784	0.713417	7523	63	CDKN3, OR7E105P, RPL13AP3, DLGAP5, OTX2-AS1, CNIH1, RPL3P3, SAV1, DDHD1, GNPNAT1, STYX, ERO1A, NAA30, GMFB, LGALS3, PYGL, TMX1, FRMD6-AS2, KTN1-AS1, KTN1, FBXO34, TMEM260, ABHD12B, FDPSP3, CHMP4BP1, SNRPGP1, COX5AP2, WDHD1, NIN	Up-regulated
chr14q23_up	0.550279	0.825419	0.257929	0.956386	4727	82	RPL21P7, GPX2, HSPE1P2, MTHFD1, TIMM9, EIF2S1, YBX1P1, PSMA3, SLC38A6, TMEM30B, RAB15, KIAA0586, FNTB, WDR89, HSBP1P1, SIX1, TRMT5, UBA52P3	Up-regulated
chr14q24_up	0.715365	0.900313	0.224224	0.884071	6531	136	PPIAP6, AHSA1, SLIRP, ACOT6, SPTLC2, RPSAP3, PLEK2, SYNJ2BP-COX16, ERH, KRT18P7, ACTN1-AS1, DCAF5, RPL7AP6, AREL1, BANF1P1, PTGR2, TMEM63C, ACYP1, ZC2HC1C, RPS2P2, ZDHHC22, VRTN, ARG2, TTLL5, FCF1, MLH3, ISCA2, DCAF4, RDH11, NRXN3, JDP2, SLC39A9, EIF2B2, SRSF5, RBM25, TTC9, NEK9, BATF, PIGH	Up-regulated
chr14q31_up	0.0521597	0.224287	-0.380949	-1.43778	127	31	MPPE1P1, STON2, BHLHB9P1, MTND5P35, EML5, NMNAT1P1, GPR65, DIO2-AS1, KCNK10, GALC, MTCYBP27, SEL1L, CEP128, PTPN21, DIO2	Down-regulated
chr14q32_up	0.00480769	0.0496154	-0.388745	-2.20358	0	319	SNORD113-1, SNORD114-20, SNORD114-12, SNORD114-21, SNORD114-25, SNORD114-22, SNORD114-28, IGHA2, IGHA1, MEG8, SNORD114-3, SNORD113-4, SNORD114-23, IGHVIII-38-1, SNORD113-5, SNORD114-9, SNORD113-2, IGHV3-71, SNORD114-14, SNORD114-24, TNFAIP2, CHGA, SNORD114-2, IGHV3-74, IGHV1-68, SNORD114-10, IGHVIII-25-1, RD3L, IGHV3-66, SERPINA3, IGHV4-59, GSC, NRDE2, BDKRB1, IGHV1-45, IGHV4-61, FBLN5, EVL, IGHV…	Down-regulated
chr15q11_up	0.000860585	0.0198727	-0.416799	-2.03957	0	101	NBEAP1, SLC20A1P3, SNORD115-21, IGHV1OR15-3, SNORD115-6, SNORD115-45, SNORD115-1, SNORD115-25, HERC2P3, GOLGA8CP, SNORD115-14, SNORD115-24, SNORD115-12, SNORD115-9, SNORD115-5, IGHV4OR15-8, SNORD115-4, OR11J2P, PWRN2, SNORD115-15, SNORD115-22, SNORD115-7, SNORD115-10, PWAR1, SNORD115-43, SNORD115-36, SNORD115-29, SNORD115-11, SNORD116-19, CYFIP1, SNORD115-2, SNORD116-1, MKRN3, SNORD115-8, SNRPN, …	Down-regulated
chr15q13_up	0.0165996	0.109813	-0.349659	-1.4831	32	50	GOLGA8Q, GREM1, GOLGA8O, GOLGA8J, TUBBP8, GOLGA8N, RPL5P32, GOLGA8R, GOLGA8T, GOLGA8F	Down-regulated
chr15q14_up	0.267322	0.557126	-0.282771	-1.1167	624	36	LPCAT4, GOLGA8A, GOLGA8B, SLC12A6, EMC7, PGBD4, THBS1, RBM17P4	Down-regulated
chr15q15_up	0.980315	0.999897	0.169585	0.650309	8714	106	CHAC1, RPS3AP47, TUBGCP4, RPUSD2, WDR76, HAUS2, RTF1, HYPK, KNSTRN, CYCSP2, NUSAP1, C15orf56, TMEM62, DNAJC17, SRP14, ZSCAN29, SUMO2P15, PDIA3P2, LCMT2, INAFM2, MYL12BP1, PHGR1, PDIA3, MGA, TGM5, RAD51, STRC	Up-regulated
chr15q21_up	0.0505319	0.224287	-0.257854	-1.26703	56	104	FGF7, SLC30A4, FBN1, ONECUT1, KRT8P24, UNC13C, USP50, HMGN2P46, SPPL2A, NDUFB10P1, TMOD3, ATP8B4, FAM214A, SLC12A1, AHCYP7, CTXN2, RFX7, SECISBP2L, WDR72, HDC, DMXL2, PYGO1, TEX9, CCPG1, GLDN, MAPK6, CD24P2, BCL2L10, PIGBOS1, SCG3	Down-regulated
chr15q22_up	0.565471	0.837354	0.256789	0.948999	4840	80	ICE2, GAPDHP61, CCNB2, TIPIN, HACD3, RPL35AP32, SPG21, ZWILCH, RPS3AP6, RPL4, RAB11A, TLN2, ANXA2, GTF2A2, USP3, RORA-AS1, PPIB, LACTB, APH1B, MEGF11	Up-regulated
chr15q23_up	0.634703	0.861859	0.262891	0.894369	5036	47	RPL12P35, KIF23, RPLP1, RPS24P16, GLCE, RPL29P30, CALML4, RPL5P3, AAGAB, PIAS1, ANP32A	Up-regulated
chr15q24_up	0.0266768	0.156423	-0.283616	-1.34803	34	86	LOXL1, LINGO1-AS1, CPLX3, DNM1P34, DNM1P33, SCAMP2, ULK3, NRG4, SIN3A, CYP1A2, BBS4, ANP32BP1, FAM219B, ETFA, SEMA7A, FKBP1AP2, MAN2C1, PEAK1, COMMD4, SCAPER, ARIH1, CSPG4P13, NPTN, ISLR, LOXL1-AS1, GOLGA6B, RPL13P4	Down-regulated
chr15q25_up	0.171888	0.476851	-0.232446	-1.13245	202	99	UBE2Q2P11, ADAMTSL3, FSD2, SNORA63, NTRK3, AKAP13, UBE2Q2P6, GOLGA6L3, UBE2Q2P12, CSPG4P10, AGBL1, SAXO2, ZNF592, MED28P6, UBE2Q2P8, GOLGA2P10, HOMER2, CHRNA3, GOLGA6L17P, ARNT2, SCARNA15, UBE2Q2L	Down-regulated
chr15q26_up	0.18785	0.506026	-0.22624	-1.11583	200	110	FAM174B, RLBP1, NR2F2, SPATA8-AS1, ARRDC4, LYSMD4, CERS3-AS1, DET1, ANPEP, IQGAP1, MCTP2, OR4F6, MEF2A, LINS1, UNC45A, ENO1P2, TTC23, ZNF774, NR2F2-AS1, WDR93, NDUFA3P4, C15orf32, HDDC3, OR4F14P, CRTC3, FURIN, RHCG, CRAT37, PEX11A, SPATA8, PCSK6-AS1, OR4G2P, CIB1, PRKXP1, KRT18P47, FES, ACAN, MAN2A2, WASH3P	Down-regulated
chr16p11_up	0.769539	0.931175	0.21322	0.869346	7295	195	BOLA2, BOLA2B, DCTPP1, EIF3C, PPP4C, BCAP31P1, NAMPTP3, SGF29, TUFM, ZNF267, PHKG2, ALDOA, PRSS8, SPNS1, SULT1A2, ASPHD1, SMG1P2, SEPHS2, ZNF785, VKORC1, INO80E, KIF18BP1, SNORA30, SETD1A, UBE2MP1, SLC25A1P4, ZNF668, RARRES2P6, DOC2A, TP53TG3B, IL27, ITGAL, KIF22, FUS, SLC7A5P1, BCLAF1P2, VN1R66P, CDIPT, PYCARD-AS1, DUX4L46, NPIPB11, QPRT, CDC37P1, VPS35P1, FRG2GP, TBX6, ZNF768, IGHV3OR16-16, RAB…	Up-regulated
chr16p12_up	0.00876011	0.0657801	0.389722	1.4962	77	107	PLK1, TMC5, LYRM1, UBFD1, RPL7P47, ARL6IP1, SNRPEP3, KNOP1, GGA2, NDUFAB1, PALB2, IQCK, NPIPB4, UQCRC2, RPS15A, NOMO2, ERI2, SNORA75, NPIPB3, METTL9, OTOA, XPO6, EEF1A1P38, DCTN5, NPIPB5, SCNN1G, CRYM-AS1, ACSM3, DCUN1D3, CYCSP39, CDR2, POLR3E, ACSM5, GTF3C1, HSPE1P16, SMG1P1, USP31, SBK1, RBBP6	Up-regulated
chr16p13_up	0.000924309	0.0198727	0.355707	1.48608	8	277	RPL21P119, RPS2, ALG1, UBE2I, NDE1, SNORA64, RSL1D1, RNPS1, SNHG19, RMI2, MLST8, USP7, SNORA78, CCNF, CPPED1, RPL23AP86, ATP6V0C, PAQR4, GSPT1, DDX11L10, COX6CP1, RPS20P2, RPS23P6, TFAP4, ERVK13-1, CLEC16A, RRN3, BFAR, SMIM22, IL9RP3, RPL7P46, NOMO3, ERCC4, ABCC1, EEF2KMT, FAM234A, IFT140, TMEM186, DNAJA3, KCTD5, GFER, ECI1, PGP, NOXO1, CAPN15, UBN1, ATF7IP2, PKD1P6, HCFC1R1, GLYR1, PRSS22, PRM3,…	Up-regulated
chr16q12_up	0.416687	0.707271	0.29082	1.03378	3440	61	TOX3, BRD7, NDUFA5P11, RPGRIP1L, LPCAT2, RPL23AP72, CRNDE, HEATR3, PHBP21, CES1P2, RPL10P14, NKD1, N4BP1, PHKB, ITFG1	Up-regulated
chr16q13_up	0.137889	0.413409	-0.32881	-1.25587	336	32	MT2A, MT1X, MT1B, MT1IP, MT1H, MT1G, MT1E, MT1M, MT1DP, MT1A, CETP	Down-regulated
chr16q21_up	0.158223	0.451983	0.362201	1.24446	1267	50	GOT2, CNOT1, CKLF-CMTM1, CSNK2A2, CKLF, DOK4, ADGRG1, SNORA46, RPL23AP91, ADGRG5, RPS27P27, SETD6, CX3CL1	Up-regulated
chr16q22_up	0.00892365	0.0657801	0.374285	1.46667	80	128	NIP7, NOB1, PDP2, UTP4, CYB5B, CDH1, HSPE1P5, DDX28, CDH3, DDX19B, RPL35AP33, CBFB, TERF2, TXNL4B, ATXN1L, TMEM208, NUTF2, NFAT5, VPS4A, EXOSC6, CES3, IST1, VAC14, ZDHHC1, SF3B3, DDX19A, PSMB10, E2F4, KRT18P18, RANBP10, CMTM4, NFATC3, DPEP3, PLEKHG4, SNORD71, SLC7A6OS, NQO1, ACD, CMTR2, DPEP2, DHODH, SMPD3, ENKD1, LRRC29, CTCF, PDXDC2P, SMG1P7, PARD6A, KIAA0895L	Up-regulated
chr16q23_up	0.216761	0.517819	0.328988	1.1748	1794	63	HSPE1P7, CENPN, KRT8P22, RPL18P13, TMEM231, RFWD3, WWOX, GCSH, BCO1, RPS3P7, HSBP1, CMC2, OSGIN1, MTCYBP28, PSMD7, BCAR1, TMPOP2, CFDP1, TMEM170A, MLYCD, TERF2IP, WDR59, ADAMTS18, CLEC18B, GLG1, FA2H, NUDT7, ATMIN, CHST6, HSD17B2, NECAB2	Up-regulated
chr16q24_up	0.0277874	0.158072	0.381366	1.42355	240	85	RPL13, SLC7A5, MVD, GINS2, DPEP1, SPIRE2, EMC8, URAHP, ZCCHC14, USP10, MBTPS1, AFG3L1P, FANCA, FLJ30679, FAM157C, ACSF3, VPS9D1-AS1, SLC22A31, FBXO31, TRAPPC2L, IL17C, SPATA2L, TUBB8P7, SNAI3-AS1, ANKRD11, TAF1C, GAS8-AS1, TCF25, TUBB3, SPG7, MAP1LC3B, ZFPM1, CA5A, DBNDD1, APRT, HSDL1	Up-regulated
chr17p11_up	0.907499	0.991061	0.191131	0.761856	8397	149	RPL13P12, SCDP1, RPS2P46, RPL21P120, SNORD3A, TNPO1P2, UBB, YWHAEP3, OLA1P2, RPL17P43, SLC47A2, SNORD3B-2, YWHAEP2, ABHD17AP6, SNORD3C, TMEM11, EIF1P5, ZNF286B, CDRT15L2, UBBP4, SLC5A10, KRT16P1, SNORD3B-1, PRPSAP2, NATD1, MPRIP, TBC1D28, MTND2P13, SNORD49A, UBE2SP2, GID4, USP32P2, TVP23B, USP22	Up-regulated
chr17p12_up	0.207442	0.510681	-0.295783	-1.16808	484	36	MEIS3P1, ZNF18, IL6STP1, COX10-AS1, TEKT3, PMP22	Down-regulated
chr17p13_up	0.999897	0.999897	0.135428	0.563258	9686	256	SPNS2, C1QBP, RPL29P2, MYBBP1A, NPM1P45, EIF5A, RPL23AP73, CD68, MAGOH2P, RPS27AP1, TM4SF5, NUP88, CCDC92B, ITGAE, OR3A3, RAP1GAP2, CXCL16, PRPF8, CHD3, PFN1, CTNS, YWHAE, TXNDC17, SMYD4, EIF4A1, SNORA67, SENP3-EIF4A1, SAT2, NDEL1, SOX15, CAMKK1, RPL26, TMEM102, SCARF1, C17orf107, OR1A1, SPATA22, MED31, SGSM2, SNORA48, OR3A2, PFAS, RPH3AL, EIF4A1P9, AURKB, SLC16A13, SLC52A1, ASGR1, SLC43A2, TMEM2…	Up-regulated
chr17q11_up	0.0397417	0.19346	0.351492	1.359	356	113	TMEM97, UBL5P2, RPS7P1, PSMD11, TUFMP1, ZNF207, KSR1, ERAL1, NEK8, ATAD5, CPD, TLCD1, UTP6, POLDIP2, RPS29P22, FOXN1, OOSP1P2, RHOT1, RPL23A, ABHD15, RPL21P123, SUZ12, UNC119, FAM222B, SLC6A4, RPL34P31, RPS12P28, CRLF3, SNORD4A, RPL9P30, BLMH, RPS16P8, LRRC37B, ITM2BP1, MYO1D, GIT1, SUZ12P1, TRAF4, WDR45BP1, NOS2	Up-regulated
chr17q12_up	0.84207	0.958904	0.20691	0.793439	7485	106	ZNF830, LRRC37A11P, MED1, DDX52, PPP1R1B, ASIC2, PSMB3, RASL10B, CCL3L3, MRM1, LIG3, CISD3, PNMT, RDM1, YWHAEP7, RPL23, TAF15, AATF, RPL19, SOCS7, RFFL, STARD3, PIGW, NEUROD2, CCL14, MRPL45, FBXL20, CDK12	Up-regulated
chr17q21_up	0.340946	0.620681	0.250567	1.0575	3343	343	CDC6, BRCA1, RPS7P11, TOP2A, RPL7P48, RPL23AP75, CHAD, ACLY, UTP18, KRTAP29-1, TNS4, SLC25A39, MRPL45P2, HSD17B1P1, RPL27, PHB, SPPL2C, PLEKHH3, KRT23, NME1, WFIKKN2, KCNH4, NBR1, LSM12, NT5C3B, NPEPPS, KRT37, RAPGEFL1, DBF4B, NAGLU, NXPH3, CDC27, JUP, KRTAP4-11, CSF3, KRTAP9-10P, ITGA2B, KRTAP17-1, KRT33A, SUMO2P7, THRA, SAMD14, HMGB3P27, TOB1, ADAM11, CBX1, KRT15, KRT43P, KRT33B, KRT19, MPP3, K…	Up-regulated
chr17q22_up	0.00173332	0.029813	0.508578	1.76203	13	52	SETP3, PRR11, RAD51C, AKAP1, COX11, STXBP4, OR4D2, RNF43, SRSF1, COIL, C17orf67, PCTP, MRPS23, MKS1, SMG8, ISCA1P3, SKA2, TOM1L1, RPL39P33, VEZF1, SPDYE22P, KIF2B, MSI2, DYNLL2, HSF5, SNRPGP17, SUPT4H1, TRIM37	Up-regulated
chr17q23_up	0.247403	0.545556	0.31303	1.14671	2095	75	BRIP1, SNORD104, GH2, SMARCD2, PRELID3BP3, SCARNA20, SNORA50C, RPL12P38, METTL2A, TBC1D3P1-DHX40P1, HEATR6, RPL23AP74, DCAF7, DDX42, RPS23P7, MED13, RPL31P57, INTS2, NACA2, FTSJ3, DHX40, TACO1, CSH1, POLG2, TRMT112P3	Up-regulated
chr17q24_up	0.706007	0.892891	0.247171	0.852366	5676	51	KPNA2, RPL17P41, NOL11, CACNG4, RPL36AP48, AXIN2, MYL6P5, LRRC37A16P, HELZ, SNORA38B, PRKAR1A, RPL32P33, SOX9, ABCA9-AS1, PSMD12	Up-regulated
chr17q25_up	0.276569	0.563738	0.267648	1.09566	2630	205	RPL12P37, RAC3, PYCR1, SLC25A19, SRSF2, BIRC5, SRP68, METTL23, ENGASE, C1QTNF1, AFMID, RPL38, SYNGR2, SNORD1B, BAIAP2, SNORD1A, RNF157-AS1, RPTOR, OXLD1, ATF4P3, ITGB4, ARL16, METRNL, CD7, ENPP7, GRIN2C, TRIM65, SUMO2, RPL23AP87, EIF5AP2, P4HB, CANT1, SLC16A5, UTS2R, CARD14, CBX2, RPL7P49, THA1P, FOXJ1, SLC25A10, C17orf80, QRICH2, UNC13D, COG1, ARHGDIA, TTYH2, C17orf99, EIF4A3, NUP85, NT5C, NPLOC…	Up-regulated
chr18p11_up	0.435818	0.730136	-0.198888	-1.00748	420	125	FGF7P1, PIEZO2, ARHGAP28, COLEC12, PPP4R1, LONRF2P1, PTPRM, ANKRD12, THEMIS3P, CBX3P2, BOD1P2, EPB41L3, ANKRD20A5P, FRG2LP, SCML2P1, PIGPP4, L3MBTL4, MYOM1, KRT18P8	Down-regulated
chr18q11_up	0.799822	0.931175	0.233327	0.786579	6288	45	PA2G4P3, TMEM241, RPS10P27, NPC1, GREB1L, SNRPD1, RPS24P18, CTAGE1, ESCO1, RIOK3, ABHD3, CABLES1, GATA6, RAC1P1, TAF4B, RBBP8, EXOGP1, MIB1, OSBPL1A, IMPACT, UBA52P9, GATA6-AS1, AQP4	Up-regulated
chr18q12_up	0.0636468	0.234584	-0.291611	-1.30766	110	62	FHOD3, SLC14A2-AS1, SETBP1, RPRD1A, MLECP1, SLC14A1, ZNF396, KLHL14, ASXL3, CDH2, SYT4, DSG1-AS1, ZNF271P, DTNA, DSG4	Down-regulated
chr18q21_up	0.925868	0.9971	0.188276	0.730384	8317	117	SNRPGP2, RPS3AP49, MAPK4, RNF165, RPL17, SERPINB11, HAUS1, RPS26P54, MTCO2P2, RPL30P14, SKA1, ONECUT2, OACYLP, LIPG, RAX, SERPINB5, NFE2L3P1, C18orf12, ST8SIA5, MYO5B, SEC11C, ME2, PRR13P4, SERPINB3, RPL17-C18orf32, LMAN1, CTBP2P3, SS18L2P2, POLR3GP2, IER3IP1, DYM	Up-regulated
chr18q22_up	0.256137	0.546144	-0.294901	-1.12635	625	32	DSEL, CDH7, DOK6, CDH19, CBLN2, CCDC102B, SERPINB8, PRPF19P1	Down-regulated
chr18q23_up	0.192212	0.506026	-0.353735	-1.21358	537	21	NFATC1, ZNF236, CTDP1, PARD6G, SMIM21	Down-regulated
chr19p12_up	0.981362	0.999897	0.167058	0.62574	8529	87	RPL36AP51, RPSAP58, ZNF737, ZNF93, RPS27P29, CDC42EP3P1, ZNF98, ZNF91, ZNF681, VN1R79P, KRT18P40, ZNF66, ZNF100, ZNF90, RPL7AP10, ZNF738, ZNF254, ZNF257, ZNF492, BNIP3P30, BNIP3P25, ZNF726, ZNF730, ZNF493, BNIP3P8, SNX6P1, RPL34P34, VN1R85P, BNIP3P28, BNIP3P27, VN1R83P, ZNF626, GOLGA2P9, BNIP3P13, ZNF714, BNIP3P38, ZNF675, ZNF682, ZNF43, BNIP3P23, VN1R80P, ZNF209P	Up-regulated
chr1p12_up	0.225132	0.528036	0.359795	1.18718	1753	40	RPS3AP12, ZNF697, WDR3, GAPDHP32, GAPDHP33, RPL6P2, PFN1P9, SEC22B, MAN1A2, HSD3BP1, TBX15, GAPDHP23, NOTCH2P1, PSMC1P12	Up-regulated
chr1p13_up	0.431855	0.728226	0.256426	1.0247	4001	154	LAMTOR5, RPL7P8, HENMT1, KRT18P57, CELSR2, SORT1, LRIF1, CAPZA1, RPS15AP9, SLC16A1-AS1, DCLRE1B, ATXN7L2, PPM1J, GPSM2, SLC16A1, TTF2, AHCYL1, ATP1A1, STXBP3, PSMA5, FTH1P22, CLCC1, TMEM167B, ST7L, ADORA3, VANGL1, PRPF38B, GSTM1, PRMT6, DRAM2, SLC22A15, WDR77, TRIM33, BCAS2, KCND3, NRBF2P3, GPR61, NRAS	Up-regulated
chr1p21_up	0.0240089	0.147282	-0.320731	-1.41868	42	59	PALMD, AMY1B, PLPPR4, AMY1A, NFU1P2, F3, S1PR1, DPH5, AMY2A, BCAS2P2, VCAM1, DPYD, AMY2B, CDC14A, RPL23AP90, RPL26P9, AMY1C, KATNBL1P2, FRRS1, ABCD3, CNN3, SOD2P1	Down-regulated
chr1p22_up	0.288077	0.572221	0.299066	1.11372	2490	84	FNBP1L, DDAH1, PTGES3P1, RPL5, DR1, RPF1, SETSIP, CDC7, BCL10, RPL36AP10, ZNF326, GBP5, GNG5, LRRC8D, PKN2, CTBS, DNTTIP2, RPAP2, HS2ST1, TGFBR3, CHCHD2P5, GBP7, MTND3P21, GBP4, MTF2, SH3GLB1	Up-regulated
chr1p31_up	0.700863	0.892891	0.227271	0.887724	6332	125	SERBP1, USP1, GIPC2, FUBP1, TPI1P1, DEPDC1, TM2D1, AK4, RPL7P10, ZRANB2, RPS15AP7, USP33, RABGGTB, UOX, GDI2P2, SLC44A5, SRSF11, ITGB3BP, ZZZ3	Up-regulated
chr1p32_up	0.00780543	0.0610243	0.396305	1.511	68	101	HSPB11, NDC1, RPL21P23, HOOK1, RPS13P2, MAGOH, HNRNPA1P6, FAF1, RPS20P5, RPSAP20, HNRNPA1P63, MYSM1, MRPL37, FGGY, CYP2J2, PHBP3, DMRTB1, ANAPC10P1, JUN, TACSTD2, PRPF38A, LRP8, NDUFS5P3, BTF3L4, TTC22, HNRNPA3P12, SLC1A7, NRDC, C8B, CYB5RL, USP24, RPS26P15, COA7, TMEM59, GAPDHP51, DIO1, TCEANC2, PDCL3P6, ORC1, FCF1P6	Up-regulated
chr1p33_up	0.786164	0.931175	0.235109	0.799853	6238	47	STIL, PDZK1IP1, FOXD2, UQCRH, CYP4Z1, CMPK1	Up-regulated
chr1p34_up	0.00221496	0.0318519	0.365449	1.49002	20	195	HSPE1P8, PSMB2, MYCBP, RPS15AP11, TMEM69, KDM4A-AS1, RAD54L, ATP6V0B, MMACHC, AKR1A1, SNORD46, GNL2, SFPQ, GJB3, MRPS15, PRDX1, CLSPN, EBNA1BP2, SMIM12, HPDL, EXO5, RPS8, EFCAB14P1, NT5C1A, CDCA8, KIF2C, TOE1, AGO4, YBX1, ZMYND12, RPL5P4, UROD, ZC3H12A, PPIH, B4GALT2, ZMYM1, NDUFS5, CDC20, THRAP3, OSTCP5, FOXJ3, TRAPPC3, TESK2, CAP1, TMEM125, HMGB1P48, RRAGC, NASP, PPCS, PABPC4, MANEAL, ARTN, RPS…	Up-regulated
chr1p35_up	0.0542176	0.227212	0.355885	1.34562	474	94	MARCKSL1, SNORA44, S100PBP, TMEM234, YTHDF2, CSMD2, DNAJC8, PTAFR, SESN2, SNRNP40, PUM1, FAM229A, RPA2, SDC3, AK2, SERINC2, TAF12, KPNA6, RNF19B, TXLNA, EPB41, PHC2, BSDC1, EYA3, SCARNA1, RBBP4, SMPDL3B, PPP1R8, ZNF362, EIF3I, IFI6, SPOCD1	Up-regulated
chr1p36_up	0.0317348	0.167944	0.290142	1.23805	314	439	NPM1P39, EPHB2, DNAJC16, RSC1A1, EEF1DP6, MRPL20, RPL12P14, RPL23AP89, EPHA8, MRTO4, PUSL1, DFFB, STMN1, RPL7P7, RPL7P11, KDM1A, RPL39P6, AGMAT, UQCRHL, NOL9, ALDH4A1, RER1, CHCHD3P3, HNRNPR, SRM, SLC25A33, SRRM1, MAD2L2, DNAJC11, CEP104, GPR153, SDHB, FAM41C, RPL12P13, IFNLR1, SRSF10, HSPB7, LYPLA2, RPL22, TMCO4, PLCH2, AUNIP, RPL11, CNKSR1, PRAMEF35P, CROCCP5, NUDC, HNRNPCL1, ENO1, TMEM51, KCNA…	Up-regulated
chr1q21_up	0.288328	0.572221	0.262227	1.08734	2788	244	GPR89B, CKS1B, LAPTM4BP1, PPIAL4F, PSMB4, HAX1, S100A11, APH1A, SCNM1, CHD1L, PPIAL4C, PPIAL4G, LCE2A, ZBTB7B, LCE3A, FAM72C, ACP6, OAZ3, PFN1P12, ANKRD34A, RFX5, SF3B4, RNF115, S100A10, PPIAL4E, JTB, S100A6, EFNA4, S100A7A, ANXA9, RIIAD1, CELF3, KPRP, PI4KB, SNX27, POLR3C, ADAM15, RPL22P5, S100A5, GPR89A, RPRD2, UBE2Q1, SPRR2E, CCT8P1, C1orf43, THEM4, TARS2, PFN1P8, C1orf56, TUFT1, S100A13, LCE3…	Up-regulated
chr1q22_up	0.232867	0.536425	0.334982	1.17107	1895	55	LAMTOR2, TSACC, DAP3, CCT3, SSR2, RAB25, MSTO2P, KRTCAP2, DPM3, GBAP1, RXFP4, MSTO1, MTX1, PAQR6, SCAMP3, FDPS, GLMP, RIT1	Up-regulated
chr1q23_up	0.0461783	0.21275	-0.234445	-1.23807	28	171	ACKR1, FCRL5, FCRL2, ITLN1, MPZ, CD1C, SLAMF1, OR10X1, CADM3, PYHIN1, CADM3-AS1, RGS4, PYHIN5P, CD48, FCGR2C, OR10T1P, SLAMF6P1, LRRC71, SLAMF7, APCS, OR10R1P, IFI16, ARHGEF11, ADAMTS4, OR10R2, RRNAD1, FCRL1, OR10J4, HMGB3P6, RAD1P2, NTRK1, OLFML2B, OR10Z1, TOMM40L, FCRL4, FCER1A, SLAMF6, OR6K1P, NOS1AP, ELL2P1, ITLN2, SH2D1B, FCRL3, DCAF8, SUMO1P3, HMGN1P5, PBX1	Down-regulated
chr1q24_up	0.384397	0.679277	-0.217711	-1.03197	541	82	DPT, AIMP1P2, TOP1P1, GM2AP2, CCDC181, RCSD1, CYCSP53, MYOC, KIFAP3, PRRX1, FMO7P, GPA33, MAEL, FMO10P, TADA1, PIGC, NME7, SUMO1P2, FMO8P, FMO4, TIPRL, MROH9, MGST3	Down-regulated
chr1q25_up	0.952671	0.999897	0.181558	0.694578	8453	104	CACYBP, GAS5, VDAC1P4, DARS2, TSEN15, KIAA1614-AS1, DHX9, EIF4A1P11, SEC16B, MR1, MRPS14, CEP350, NCF2, ZNF648, EIF1P3, CENPL, SMG7, KIAA0040, RPL5P5, NPL, GOT2P2, ACBD6, FAM163A	Up-regulated
chr1q31_up	0.197967	0.508525	-0.276739	-1.16006	408	47	CFH, KCNT2, RGS13, CFHR1, SLC4A1APP2, CRB1, PRG4, RGS18, PDC, CFHR4, BRINP3	Down-regulated
chr1q32_up	0.591218	0.839926	0.235532	0.95352	5560	179	HSPE1P6, CD46, SNRPGP10, INTS7, RPL21P28, UBE2T, SNRPE, FLVCR1, PROX1, RPL23AP16, FDPSP8, GOLT1A, SOX13, CYB5R1, TMEM183A, IPO8P1, SMYD2, PLEKHA6, CHIT1, FAM72A, AVPR1B, RPL23AP18, TRAF5, PPP2R5A, G0S2, ELK4, KIF14, IRF6, ASCL5, TIMM17A, EIF2D, CHI3L1, RPS26P13, IL19, NUCKS1, LEMD1-AS1, IL24, SLC41A1, SNX25P1, HSD11B1, LPGAT1, RABIF, PFKFB2, ADORA2BP1, NEK2, LAD1, FAM71A	Up-regulated
chr1q41_up	0.618873	0.854065	0.258336	0.909842	5062	58	IARS2, CENPF, RRP15, TAF1A-AS1, MRPS18BP1, RPS15AP12, BROX, QRSL1P2, ABHD17AP3, CCDC185, KRT18P12, DISP1, GPATCH2, MIA3, RAB3GAP2	Up-regulated
chr1q42_up	0.0044238	0.0485327	0.38935	1.52177	39	126	COA6, TMEM63A, CNIH4, RPS27P5, MRPL55, GNG4, TARBP1, LBR, HMGB1P26, LDHAP2, SNAP47, RNF187, PARP1, IRF2BP2, OBSCN, COG2, LIN9, PYCR2, GNPAT, TAF5L, ARV1, C1orf131, ZNF678, RPS7P3, SRP9, ARF1, TOMM20, ENAH, TSNAX-DISC1, GPR137B, TTC13, FTH1P2, YBX1P9, MTCO3P46, SPRTN, ISCA1P2, ABCB10, TMEM78, ARID4B	Up-regulated
chr1q43_up	0.213016	0.513628	0.357322	1.19317	1665	43	RPL35P1, RPL10AP5, LGALS8, FCF1P7, HEATR1, LGALS8-AS1, RPS7P5, EXO1, RPSAP21	Up-regulated
chr20p11_up	0.00376669	0.044173	0.418083	1.58079	32	94	PPIAP2, SNX5, GINS1, XRN2, RPL21P3, CRNKL1, MGME1, SEC23B, NAA20, VN1R108P, RPS15AP1, CST4, FAM182B, CFAP61, ENTPD6, KIZ, RPL12P12, RPS19P1, RALGAPA2, NAPB, RPL24P2, KRT18P3, CST1, CFTRP1, CST2, ZNF337-AS1, THBD, ZNF877P, GZF1, EEF1A1P34, DZANK1, CSTP2, NKX2-4, CST12P, APMAP, NXT1, PAX1, RPL41P1, SSTR4, CSTP1, PYGB	Up-regulated
chr20p12_up	0.254932	0.546144	0.316935	1.14281	2131	67	FERMT1, SNRPB2, TRMT6, PCNA, PA2G4P2, MCM8, ESF1, CRLS1, GAPDHP2, RPS10P2, MKKS, DSTN, DYNLT3P1, SLX4IP, PGAM3P, NDUFAF5, RPS11P1, ANKEF1, RPS18P1, KIF16B, GPCPD1, RRBP1, LRRN4	Up-regulated
chr20p13_up	0.0194042	0.122104	0.382211	1.44516	169	94	RPL7P2, RPL21P2, NOP56, CDC25B, SNRPB, IDH3B, PSMF1, C20orf27, CSNK2A1, FKBP1A, SDCBP2-AS1, FTLP3, FAM110A, UBOX5, RPS4XP2, RBCK1, SOX12, NSFL1C, VPS16, ZNF343, PTPRA, TRIB3, UBE2V1P1, DDRGK1, DEFB129, SLC52A3, HSPA12B, MRPS26, ITPA, PRNT	Up-regulated
chr20q11_up	0.00010653	0.00557536	0.49087	1.98463	0	176	TPX2, SNORA71D, SNORA71C, DSN1, EIF2S2, RBL1, SNORA71B, EIF6, NFS1, FAM83D, RPS3AP3, ROMO1, FDX1P1, SUN5, RPS27AP3, RPRD1B, RPF2P1, PHF20, E2F1, NCOA6, MAPRE1, RPL36P4, UQCC1, CDK5RAP1, HM13, PLAGL2, CTNNBL1, GSS, PPIAP3, RBM39, TGIF2, AHCY, ASXL1, POFUT1, ITCH, ERGIC3, CNBD2, FRG1BP, RPN2, TM9SF4, TTI1, TTLL9, DYNLRB1, RPL37P1, ZNF341, FRG1DP, FAM83C, PDRG1, COX7BP2, PXMP4, RPL31P2, NDRG3, RALY,…	Up-regulated
chr20q13_up	0.000102838	0.00557536	0.426394	1.78041	0	276	CSE1L, PFDN4, TOMM34, DNAJC5, PARD6B, AURKA, PSMA7, PRELID3B, RPS21, UBE2C, APCDD1L, ZSWIM1, SNORD12C, STAU1, B4GALT5, SDC4, YTHDF1, GID8, DDX27, MMP9, RPS2P7, RAE1, TFAP2C, RNF114, ZFAS1, CSTF1, SERINC3, YWHAB, ADNP, OSBPL2, FAM217B, ZSWIM3, NELFCD, PPIAP21, ZNFX1, MOCS3, STX16, SLPI, RPL37AP1, ZMYND8, UBE2V1, PIGT, MYBL2, VAPB, ARPC3P1, RPL12P4, HNF4A, STX16-NPEPL1, SPATA2, TCFL5, ZFP64, DNTTIP…	Up-regulated
chr21q11_up	0.0635382	0.234584	-0.361935	-1.39307	152	33	FGF7P2, ANKRD20A11P, ANKRD30BP2, GTF2IP2, ANKRD20A18P, ZNF114P1	Down-regulated
chr21q21_up	0.7411	0.919248	0.235195	0.837578	6119	62	PPIAP22, RPL10P1, MRPL39, RPL13AP7, RPL37P3, CCT8, EEF1A1P1, BTG3, CYCSP42, PPIAP1, N6AMT1, BTF3L4P1, HSPD1P7, RPL39P40, RPL37P4, D21S2088E	Up-regulated
chr21q22_up	0.312093	0.607623	0.258315	1.07514	3021	259	CHAF1B, PSMG1, WDR4, GART, CBR1, RPL23AP3, SLC5A3, SIM2, RPS20P1, MIS18A, RPL8P2, PIGP, SNORA80A, PAXBP1, MRPL20P1, HUNK, RPL23AP4, KRTAP10-1, EZH2P1, SCAF4, RPL23AP12, U2AF1, HLCS, KRTAP10-6, NDUFV3, RPS5P3, ETS2, RRP1B, TTC3-AS1, TMPRSS2, BTF3P6, RIPPLY3, PRDM15, SOD1, PCBP2P1, TSPEAR, PLAC4, IMMTP1, PRMT2, PFKL, UBE2G2, SMIM11A, TMEM97P1, SLC19A1, KRTAP10-5, AGPAT3, KRTAP21-4P, MCM3AP-AS1, PDXK	Up-regulated
chr22q11_up	0.00757576	0.0610243	-0.231684	-1.30385	1	281	IGLV3-19, IGLV1-41, IGLV3-4, ADORA2A-AS1, IGLV2-33, IL17RA, IGLV1-47, THAP7-AS1, RGL4, IGLVI-20, LZTR1, IGLL3P, IGLV10-67, SDF2L1, IGLV2-28, ARL5AP4, IGLV2-18, LRP5L, IGLV1-50, IGLL5, GGT5, CCT8L2, BMP6P1, IGLV2-23, IGLV5-48, LL22NC03-63E9.3, IGLV1-40, IGLV3-30, ACTR3BP6, IGLV2-11, YPEL1, GAB4, FAM230B, IGLC3, IGLV4-60, IGLV2-14, IGLV3-21, NF1P6, CECR9, IGLC4, BCL2L13, IGLC6, CLDN5, XKR3, C22orf3…	Down-regulated
chr22q12_up	0.983623	0.999897	0.166957	0.663977	9068	146	HMGB1P10, PES1, RPS15AP38, DUSP18, HMGXB4, SLC5A1, PITPNB, MPST, FBXO7, DRG1, TTC28-AS1, HPS4, NIPSNAP1, APOL1, YWHAH, RNF185-AS1, C1QTNF6, TPST2	Up-regulated
chr22q13_up	0.277499	0.563738	0.266519	1.0943	2653	212	TCF20, CENPM, POLR2F, PRR5-ARHGAP8, WNT7B, GTSE1, RPS19BP1, CDPF1, XRCC6, SH3BP1, MEI1, NDUFA6, APOBEC3H, RPL5P34, ATF4, TRMU, RRP7BP, SNU13, SNORD83A, PLXNB2, TSPO, FAM83F, EIF3L, PHF5A, TNFRSF13C, XPNPEP3, TTLL12, RBX1, MICALL1, L3MBTL2, TTLL1, RABL2B, RPL5P35, SLC25A17, RPL7P52, TTC38, SOX10, PRR34, SYCE3, CRELD2, ARHGAP8, KCNJ4, DESI1, HDAC10, ADM2, MCHR1, NAGA, C22orf34, PRR5, ARFGAP3, MAPK8…	Up-regulated
chr2p11_up	0.00134228	0.0257808	-0.47836	-2.5071	0	153	IGKV2-28, IGKV2D-28, IGKV1-6, IGKV1-35, IGKV2D-10, IGKV6-21, IGKV1D-35, IGKV1D-39, IGKV1-37, IGKV1-12, IGKV1D-42, IGKV1D-37, IGKV1D-12, IGKV3D-7, IGKV3D-20, IGKV2D-29, TCF7L1-IT1, IGKV3D-11, IGKV2-38, IGKV2-4, IGKV2-29, IGKV1D-22, RETSAT, IGKV1D-32, IGKV3-20, IGKV3-15, IGKV1-33, IGKV1-13, IGKV6D-21, RGPD2, IGKV1-39, IGKV1-27, IGKV1D-16, IGKV1OR2-118, IGKV1-8, IGKV2-18, IGKV3-11, IGKV1-16, IGKV2D-…	Down-regulated
chr2p12_up	0.754555	0.922631	-0.23689	-0.812713	2111	21	CTNNA2, LRRTM1, MTND4P25, MTND6P7, MTCYBP7, LYARP1, HK2	Down-regulated
chr2p13_up	0.243182	0.545556	0.297655	1.13873	2157	104	STAMBP, MOGS, CCT7, FAM136A, MTHFD2, SMYD5, SNRPG, ANXA4, PCGF1, BOLA3, SEMA4F, APLF, GFPT1, TPRKB, PAIP2B, RPS20P10, TIA1, TEX261, OR7E62P, NFU1, SPR, CYP26B1, PCBP1, HTRA2, FBXO41, NAT8B, ASPRV1, RPSAP28, NOTO, MPHOSPH10	Up-regulated
chr2p14_up	0.109914	0.358961	0.463246	1.34489	795	22	C1D, LGALSL, RPL23AP37, PPP3R1, MEIS1-AS3, AFTPH, RAB1A, ACTR2, PNO1, VTRNA2-2P, CEP68, SERTAD2, MEIS1-AS2, PELI1, ETAA1, SPRED2	Up-regulated
chr2p15_up	0.203016	0.508525	0.41672	1.22061	1480	23	XPO1, CCT4, RPS24P7, B3GNT2, MDH1	Up-regulated
chr2p16_up	0.0304569	0.167189	0.423718	1.46802	245	52	BCL11A, PNPT1, BTF3P5, VRK2, SNORA75, CCDC85A, EIF3FP3, KNOP1P3, FOXN2, TSPYL6, FANCL, RPL7P13, NONOP2, LHCGR, RPL23AP32, PSME4, PAPOLG, PRORSD1P, CHAC2	Up-regulated
chr2p21_up	0.456463	0.746703	0.30254	1.01024	3569	43	PIGF, RPL12P19, LRPPRC, CRIPT, EPCAM, DYNC2LI1, MSH2, ATP6V1E2, SLC3A1, PKDCC, EML4, COX7A2L, LDHAP3, PREPL	Up-regulated
chr2p22_up	0.0515163	0.224287	0.397023	1.4033	422	59	CEBPZOS, SRSF7, CEBPZ, SLC30A6, DPY30, GEMIN6, ATP6V0E1P3, SLC25A5P2, ATL2, DDX50P1, YIPF4, TMEM178A, NDUFAF7, THUMPD2, EIF2AK2, MAP4K3, MYADML, SPAST, HEATR5B, MEMO1, GAPDHP25	Up-regulated
chr2p23_up	0.00246416	0.0318519	0.412752	1.58974	21	109	UBXN2A, MRPL33, KRTCAP3, RPL23AP34, RPL36AP13, MPV17, PPM1G, WDR43, SLC4A1AP, PREB, IFT172, CENPO, LCLAT1, ATRAID, SNORD92, GPN1, TRMT112P6, POMC, CGREF1, TPM3P7, PPIL1P1, SDHCP3, MAPRE3, CAD, PGAM1P6, SLC30A3, DTNB, RAB10	Up-regulated
chr2p24_up	0.72658	0.905592	0.257761	0.823543	5529	34	DDX1, MYCNUT, GDF7, TTC32, APOB, NUTF2P8, LAPTM4A, MSGN1, MYCNOS, SLC7A15P, MYCN, GEN1	Up-regulated
chr2p25_up	0.0325473	0.167944	0.417485	1.4595	264	55	NOL10, ACP1, SNRPEP5, CPSF3, PDIA6, RPS7, RPL30P3, NPM1P48, ODC1, GRHL1, ALLC, ATP6V1C2, ITGB1BP1, YWHAQ, TAF1B, NTSR2, ADAM17, HPCAL1, ROCK2, SNTG2, FAM110C, COLEC11, DCDC2C, NRIR, CYS1, EIF1P7, CMPK2, IAH1, SH3YL1, GAPDHP48, SOX11	Up-regulated
chr2q11_up	0.843686	0.958904	0.207291	0.791765	7469	103	ANKRD23, EIF5B, CNOT11, MRPL30, MITD1, NPAS2, FAHD2A, STARD7, MRPS5, SNX18P14, COX5B, C2orf15, RPL31, RNF149, UNC50, IGKV2OR2-2, FAHD2CP, REV1, YWHAQP5, TSGA10, INPP4A, MGAT4A	Up-regulated
chr2q12_up	0.15942	0.451983	-0.287241	-1.19455	340	45	IL1RL1, SLC9A2, IL18R1, GMCL1P2, ST6GAL2-IT1, SULT1C2P1, SULT1C4, UXS1, RGPD4, SNORA72, GPR45	Down-regulated
chr2q13_up	0.281452	0.567303	0.381479	1.14999	2084	26	BUB1, ANAPC1, RPL10P5, EEF1E1P1, TMEM87B, RPL22P11, CCDC138, RPL5P9, RPS14P4, RANBP2, MALL, MERTK	Up-regulated
chr2q14_up	0.52532	0.809737	0.255871	0.974315	4636	100	YWHAZP2, DBI, CKAP2L, CBWD2, NIFK, INSIG2, TMEM185B, ZC3H8, EPB41L5, NPM1P32, UGGT1, TSN, PAX8-AS1, DDX18, PTPN4, C2orf76, IL1B, ISCA1P6, RABL2A, C1QL2, RPL12P15, PAX8, CCDC93, POLR1B	Up-regulated
chr2q21_up	0.896633	0.991061	-0.170548	-0.817207	1144	89	ANKRD30BL, ARHGEF4, MTCO1P18, MTND4P21, NCKAP5, ARHGAP42P1, MTND4P27, CFC1, MTND2P22, MTATP6P7, RHOQP2, ZRANB3, MTND6P10, KLF2P3, CYCSP8, MTND5P23, POTEKP	Down-regulated
chr2q22_up	0.0182126	0.117471	-0.406265	-1.59015	42	35	MTND2P19, ZEB2-AS1, ZEB2, MTND6P11, LRP1B, MTCO2P5, KYNU, SNORA72, MRPS18BP2, CXCR4, SMC4P1	Down-regulated
chr2q23_up	0.634032	0.861859	0.287135	0.887701	4746	29	ARL6IP6, ORC4, RIF1, MMADHC, TXNP5, FABP5P10, PRPF40A	Up-regulated
chr2q24_up	0.801244	0.931175	0.219221	0.80644	6828	77	CERS6, AHCTF1P1, CERS6-AS1, STK39, SLC38A11, MTND2P20, FAM133DP, PLA2R1, PSMD14, GALNT5, GALNT3, TBR1, DPP4, PKP4, MTCO1P45, SCN9A, OR7E28P, FAP, RPEP5, DAPL1	Up-regulated
chr2q31_up	0.116855	0.372205	0.326084	1.24326	1032	101	CDCA7, SPC25, ITGA6, OLA1, SSB, KLHL23, CWC22, ERICH2, CIR1, METTL5, RPSAP24, RPSAP25, HAT1, RBM45, OSBPL6, SAP18P2, UBE2V1P6, FASTKD1, PPIG, SP3, DAP3P2, PHOSPHO2, GORASP2, PRKRA, HOXD-AS2, TTN-AS1	Up-regulated
chr2q32_up	0.326289	0.617838	0.306284	1.09372	2701	63	HIBCH, DNAJB1P1, NUP35, SLC39A10, WDR75, NABP1, PCGEM1, HNRNPA1P47, GLS, ORMDL1, GAPDHP59, CACYBPP2, ZC3H15, MFSD6, ANKAR, NAB1, INPP1, RPL23AP35, STAT1, DNAJC10, DUSP19, NEMP2, ZSWIM2, HNRNPCP2, OSGEPL1-AS1, RPL23AP33, TFPI, MYO1B	Up-regulated
chr2q33_up	0.251498	0.546144	0.28882	1.12659	2266	124	HSPE1, GTF3C3, NIF3L1, UBE2V1P11, HSPD1, SNORD51, MARS2, TYW5, RPL12P17, ORC2, SNORD11, SNORD70, ABI2, SUMO1, NDUFB3, IMPDH1P10, TMEM237, FZD5, SPATS2L, NOP58, SNORD11B, CLK1, EEF1B2, NPM1P33, PPP1R14BP2, WDR12, CYP20A1, CTLA4, INO80D, METTL21A, AOX2P, PLCL1, CFLAR-AS1, MTND5P31, CRYGA, CCNYL1, CASP10, BZW1, SF3B1, ICA1L, FAM117B, MRPL50P2, TRAK2, BICD1P1, PARD3B, HNRNPA1P51, NDUFS1	Up-regulated
chr2q34_up	0.901028	0.991061	0.219789	0.679494	6745	29	RPL5P8, RPE, MYL6BP1, MEAF6P1, IDH1, CRYGFP, LANCL1, UNC80	Up-regulated
chr2q35_up	0.539921	0.822211	0.2595	0.962211	4638	82	ATIC, RPL23AP31, TUBA4A, RPL37A, XRCC5, TTLL4, BCS1L, GMPPA, VIL1, USP37, BARD1, TNP1, PNKD, RPL23P4, CFAP65, INHA	Up-regulated
chr2q36_up	0.613379	0.854065	0.268597	0.905478	4822	45	AGFG1, FARSB, MFF, CUL3, CCL20, HSPA9P1, TM4SF20, CCDC140, AP1S3, RPL23AP28, FBXO36	Up-regulated
chr3p11_up	0.374738	0.668208	-0.312218	-1.04285	1073	19	PROS2P, HSPE1P19, ICE2P2, APOOP2, EPHA3, ZNF654, C3orf38, ABCF2P1, CBX5P1	Down-regulated
chr3p12_up	0.980719	0.999897	-0.15666	-0.626453	2237	38	VGLL3, CNTN3	Down-regulated
chr3p13_up	0.0325116	0.167944	-0.460658	-1.5804	90	21	PDZRN3, PDZRN3-AS1, CCDC75P1, FOXP1-IT1, FOXP1, UBE2Q2P9, GXYLT2	Down-regulated
chr3p14_up	0.411586	0.70395	0.28027	1.03755	3530	81	THOC7, TMF1, PSMD6, FHIT, RPL21P41, SYNPR, EOGT, APPL1, SLC25A26, UBA3, RPL10AP6, FEZF2, KRT8P35, SYNPR-AS1, PRICKLE2-AS1, LMOD3, PDE12, UBL5P3, LRIG1, KCTD6, CADPS, ADAMTS9-AS1, WNT5A-AS1, ABHD6, IL17RD, SPATA12, RPS15P5	Up-regulated
chr3p21_up	0.0772028	0.269167	0.297248	1.22901	742	233	SMARCC1, GNL3, SNORD19, WDR82, NCKIPSD, EXOSC7, KIF9, TEX264, RPS24P8, CACNA1D, RPL29, IMPDH2, IL17RB, ACTR8, RFT1, PRKAR2A, SNORD69, RAD54L2, SLC6A20, SPCS1, ATRIP, BOLA2P2, RRP9, PLXNB1, KLHL18, QRICH1, SMIM4, TKT, CDCP1, APEH, KIAA1143, GLYCTK, SACM1L, DCP1A, SCAP, NDUFAF3, TMA7, TCAIM, RNF123, DALRD3, KIF15, CAMKV, CYB561D2, LSMEM2, LRRC2-AS1, BAP1, FCF1P2, CISH, NME6, TRAIP, IP6K2, IFRD2, ZN…	Up-regulated
chr3p22_up	0.4629	0.750722	0.25689	1.00891	4210	131	CMTM8, GLB1, RPL30P4, RPL23AP43, RPL29P11, RPL14, OXSR1, RPSAP11, RPSA, EEF1GP3, XYLB, DLEC1P1, ITGA9, GORASP1, UBP1, GEMIN2P2, CTDSPL, CNOT10, CTNNB1, CMTM6, TCEA1P2, PDCD6IP, SS18L2	Up-regulated
chr3p24_up	0.188844	0.506026	-0.256957	-1.15805	324	63	RBMS3, THRB-AS1, RPS12P5, UBE2E2, RFTN1, RANP7, EOMES, NEK10, MTND4LP9, RBMS3-AS1, TAF9BP1, KAT2B, CFL1P7, CRIP1P2, ZNF385D	Down-regulated
chr3p25_up	0.0723428	0.259228	0.335249	1.29742	649	114	PRRT3-AS1, FANCD2, KRT18P17, RAD18, LHFPL4, IL17RE, LSM3, TSEN2, VHL, NUP210, PPARG, THUMPD3-AS1, ARPC4, METTL6, GALNT15, DPH3, CYCSP11, SLC6A6, EMC3-AS1, CIDEC, OXTR, RPUSD3, SEC13, RPL32, LMCD1-AS1, LMCD1, HDAC11, VN1R21P, OXNAD1, MRPS25, RPS3AP53, CAPN7, NUP210P2, GHRL, TTLL3, DUSP5P2, JAGN1, SH3BP5-AS1, XPC, CCDC174, CAND2, GRIP2, CHCHD4, HACL1, TADA3	Up-regulated
chr3p26_up	0.839051	0.958904	-0.200953	-0.786545	1980	35	CNTN4, GRM7-AS1, GRM7-AS3	Down-regulated
chr3q11_up	0.8765	0.978579	0.218664	0.717664	6791	39	ARMC10P1, HNRNPKP4, RPL38P4, CPOX, RCC2P5, UBFD1P1, WDR82P1, OR5H15, NSUN3	Up-regulated
chr3q12_up	0.591777	0.839926	-0.24027	-0.924789	1424	33	ABI3BP, ACTG1P13, DUSP12P1, ADGRG7, VTI1BP1, FAM172BP, PCNP	Down-regulated
chr3q13_up	0.00603015	0.0536602	-0.283698	-1.43576	5	123	FSTL1, CCDC80, CD200, RETNLB, SLC15A2, ARHGAP31, CD200R1, EAF2, GAP43, HCLS1, TUSC7, TAGLN3, PHLDB2, MTCO1P29, MTND4P16, MTND6P6, POPDC2, BBX, MORC1, FCF1P3, TMEM39A, BTLA, ADPRH, ZBTB20-AS4, IGSF11, EIF4E2P2, CFAP44-AS1, HGD, HHLA2, CD96	Down-regulated
chr3q21_up	0.0587104	0.229504	0.347923	1.32653	518	101	UMPS, RPL7P15, WDR5B, MUC13, HACD2, SLC41A3, FAM86JP, CCDC14, TMED10P2, KPNA1, FTH1P4, DTX3L, SNORA7B, RPN1, UROC1, CCDC58, PARP14, GATA2, RPS3AP14, FAM162A, EEFSEC, HMCES, MYLK-AS1, RUVBL1, RPS27P12, ZNF148, ISY1, PARP9, SEC22A, HNRNPA1P23	Up-regulated
chr3q22_up	0.00451467	0.0485327	-0.31847	-1.51271	5	85	COL6A6, SLCO2A1, IL20RB-AS1, NDUFS6P1, C3orf36, TF, PPP2R3A, HMGB3P14, RAB6B, A4GNT, SOX14, PCCB, HSPA8P19, ACAD11, IL20RB, NME9	Down-regulated
chr3q23_up	0.224061	0.528036	0.356335	1.18454	1746	42	SLC25A36, ZBTB38, RPL23AP41, MRPS22, TFDP2, TPT1P3, GK5, ATR, U2SURP, PRR23A, NMNAT3, KRT18P35, BPESC1, COPB2, ACTG1P1, ATP1B3, PRR23C, PXYLP1, RASA2, PLS1	Up-regulated
chr3q25_up	0.102059	0.341964	-0.241126	-1.18569	113	105	GFM1, MBNL1-AS1, GPR171, HMGN2P13, MRPL42P6, MED12L, DDX50P2, WWTR1, KCNAB1-AS2, P2RY14, IGSF10, RARRES1, PTX3, ARHGEF26-AS1, CP, P2RY13, LXN, ARHGEF26, CLRN1	Down-regulated
chr3q26_up	0.977497	0.999897	0.170739	0.657848	8730	110	NMD3, ASS1P7, DNAJC19, ACTL6A, MFN1, RPL23AP42, UBE2V1P2, NCEH1, GPR160, PRKCI, HMGN2P26, EEF1GP4, RPL22L1, TBL1XR1, ZNF639, ACTG1P23, PEX5L-AS1, NDUFB5, ZBBX, GHSR, SPATA16, SLC31A1P1, PDCD10, LRRC34, TMEM212-IT1, PIK3CA, PSAT1P4, GOLIM4, MRPL47, EGFEM1P, CLDN11, NAALADL2, FAUP2, OTOL1, ACTRT3, RPL21P43, MYNN, EI24P1, WDR49	Up-regulated
chr3q27_up	0.645682	0.867635	0.242837	0.906454	5599	85	ALG3, TMEM41A, RFC4, EIF4A2, SNORD66, RPS20P14, POLR2H, ETV5, ST6GAL1, PARL, EPHB3, EEF1A1P8, RPL4P4, TRA2B, VWA5B2, PSMD10P2, RTP4, CHRD, DNAJB11, MCCC1, MAGEF1, PSMD2	Up-regulated
chr3q28_up	0.389533	0.68367	-0.292429	-1.0389	1041	24	LPP-AS1, GMNC, TPRG1-AS1, FGF12-AS1, NMNAT1P3	Down-regulated
chr3q29_up	0.948348	0.999897	0.187177	0.676207	7949	68	TFRC, LSG1, MUC20P1, PAK2, UBXN7, LRRC15, TNK2, RPSAP69, RPL35A, ATP13A3, NCBP2, TUBB8P8, TMEM44, RPL23AP93, RNF168, WDR53, PCYT1A, XXYLT1, DPPA2P3	Up-regulated
chr4p11_up	0.0281834	0.158072	-0.501074	-1.61735	82	17	ANKRD20A17P, OCIAD1-AS1, MTCO3P39, TEC, CWH43, SLC10A4	Down-regulated
chr4p12_up	0.784044	0.931175	0.281877	0.769227	5532	17	RAC1P2, NFXL1, COMMD8, GUF1, YIPF7, PRDX4P1	Up-regulated
chr4p13_up	0.693262	0.892891	-0.25089	-0.848231	1954	20	UCHL1-AS1, ATP8A1, KCTD8, OR5M14P, SHISA3	Down-regulated
chr4p14_up	0.0573139	0.227492	-0.355906	-1.40552	133	36	FAM114A1, TLR10, RELL1, TLR6, TMEM156, KLB	Down-regulated
chr4p15_up	0.315587	0.607623	-0.229016	-1.06693	491	74	RPS3AP17, SLIT2-IT1, SNORA63, HPRT1P1, KCNIP4-IT1, IGBP1P5, KCNIP4, SLIT2, FBXL5, CC2D2A, LGI2, FGFBP1, CCDC149, PPARGC1A	Down-regulated
chr4p16_up	0.935264	0.9971	0.184819	0.73726	8653	151	SCARNA22, LYAR, SLBP, GRPEL1, S100P, GMPSP1, NELFA, ZNF721, FAM90A26, OR7E43P, FAM86KP, C4orf48, TACC3, RPS7P15, LRPAP1, PSAPL1, HGFAC, CYTL1, AFAP1-AS1, NOP14, SH3BP2, FGFRL1, ABLIM2, TBC1D14, TMEM129, STX18-AS1	Up-regulated
chr4q12_up	0.135285	0.413409	0.365641	1.27057	1094	53	PPAT, SRP72, DCUN1D4, PAICS, MORF4L2P1, NMU, RPL7AP31, RPL38P3, NOA1, RPS26P24, SNORA26, SRD5A3, FIP1L1, ARL9, DANCR, TMEM165, POLR2B, UBE2CP3, THEGL	Up-regulated
chr4q22_up	0.139405	0.413409	-0.295549	-1.2229	299	44	HPGDS, MEPE, ATOH1, MMRN1, SPARCL1, UNC5C, DSPP, RPL30P6	Down-regulated
chr4q24_up	0.910393	0.991061	-0.188724	-0.720816	2224	32	MTND5P5, EMCN	Down-regulated
chr4q25_up	0.405405	0.701977	-0.240491	-1.02526	794	51	ANK2, ZNF969P, SEC24B, SETP20, LEF1-AS1, KRT19P3, PITX2, EXOC7P1, ENPEP, HSBP1P2, COL25A1, RPSAP34, CYP2U1, ZBED1P1, ZACNP1, RBMXP4	Down-regulated
chr4q26_up	0.974906	0.999897	-0.161692	-0.628757	2330	34	CAMK2D, SEC24D, NT5C3AP1, PRSS12, CUL4AP1, USP53	Down-regulated
chr4q27_up	0.704151	0.892891	0.292354	0.838895	5071	21	CCNA2, BBS7, MAD2L1, QRFPR, IL21, NDNF	Up-regulated
chr4q31_up	0.701258	0.892891	-0.189202	-0.909246	891	90	SFRP2, NDUFB4P9, NR3C2, LSM3P4, TBC1D9, GYPE, MGARP, GUSBP5, TNRC18P1, INPP4B, FGA, AKIRIN2P1, SMAD1-AS2, MND1, FTH1P24, DCLK2, PRSS48, ZBTB8OSP1, RPL5P13, MGAT4D, EDNRA, SETD7	Down-regulated
chr4q32_up	0.614496	0.854065	-0.201535	-0.938899	957	74	TLL1, MAP9, NPY1R, CPE, RPL9P16, RBM46, GK3P, RXFP1, NPY5R	Down-regulated
chr4q35_up	0.505547	0.790492	0.271764	0.981791	4237	68	FRG1, HSP90AA4P, RPL23AP84, DCTD, CFAP97, CDKN2AIP, ENPP6, DUX4L8, CASP3, RWDD4, RARRES2P4, CCDC110, WWC2-AS1, AGGF1P1, TUBB7P, ING2, SNX25, DUX4L4, CYP4V2, FAT1, CLUHP4, C4orf47, LRP2BP, PRIMPOL, ACSL1, TRAPPC11, UFSP2, DBET, DUX4L1, DUX4L6, DUX4L5, DUX4L3, DUX4L2, CENPU, DUX4L7	Up-regulated
chr5p12_up	0.474823	0.760896	-0.287968	-0.973588	1338	20	FGF10, FGF10-AS1, CCL28, CCDC152, NIM1K, HCN1	Down-regulated
chr5p13_up	0.664864	0.879667	0.238959	0.895056	5778	87	SKP2, SNORD72, C1QTNF3-AMACR, RPS4XP6, BRIX1, SUB1, LMBRD2, NUP155, C5orf51, EGFLAM, GCSHP1, KRT18P56, NADK2, ZFR, RPL19P11, UBL5P1	Up-regulated
chr5p14_up	0.32608	0.617838	-0.344312	-1.0882	973	16	CCNB3P1, CDH9, PRDM9, PMCHL1, CDH10	Down-regulated
chr5p15_up	0.928739	0.9971	-0.165553	-0.793272	1185	89	BASP1, FASTKD3, SEMA5A, MTCO1P31, ADAMTS16, FBXL7, EXOC3, TAS2R1, SDHAP3, CTD-2297D10.2, MTCO1P30, AHRR, NKD2, BRD9, TERT	Down-regulated
chr5q11_up	0.238994	0.545509	-0.261709	-1.12523	455	53	RPS17P11, RAB3C, GAPT, PLPP1, GPX8, ACTBL2, IL6ST, MIER3, FST, PLK2, C5orf67, KATNBL1P4, NDUFB4P2, C1GALT1P2	Down-regulated
chr5q12_up	0.0695459	0.252716	0.432034	1.39576	532	36	DIMT1, CKS1BP3, NDUFAF2, ISCA1P1, CENPK, SMIM15, ELOVL7, IPO11, KIF2A, PPWD1, KRT8P31, TRAPPC13, NLN, CWC27, SREK1, SREK1IP1, SETP21, DEPDC1B	Up-regulated
chr5q13_up	0.00774835	0.0610243	0.414102	1.54212	66	84	OCLN, RPL7P23, CCNB1, GFM2, MCCC2, PIK3R1, MARVELD2, SUMO2P4, CDK7, ENC1, CENPH, HMGCR, TAF9, CCDC125, HEXB, RPS2P24, BTF3, RPL7P22, VWA8P1, GTF2H2, CHCHD2P2, SNORA47, NSA2, NDUFB9P1, SV2C, ANKRA2, BIN2P2, SMN1	Up-regulated
chr5q14_up	0.209815	0.510681	0.316688	1.17237	1799	81	TRMT112P2, TBCA, DHFR, POLR3G, TMEM161B-AS1, ZFYVE16, RPS23, PPIAP11, TMEM167A, MSH3, CETN3, XRCC4, TMEM161B, WDR41, LHFPL2, SERINC5, LUCAT1, HOMER1, RASA1, CKMT2, THBS4, ZCCHC9, CKMT2-AS1, SCAMP1, ATP6AP1L, NBPF22P, COX7C, CCNH, RBBP4P6, ACTBP2, SCARNA18, LYSMD3, SPZ1, ATP6V1G1P6, DBIP2, HMGB1P21	Up-regulated
chr5q15_up	0.798555	0.931175	0.237444	0.779299	6187	39	SETP22, RGMB, RPL7P18, KRT8P32, NPM1P27, FAM81B, TTC37, MTND5P12, LNPEP	Up-regulated
chr5q21_up	0.614997	0.854065	0.287783	0.903605	4641	31	PPIP5K2, SLCO6A1, MTCYBP22, KRT18P42, FER, PSMC1P5, EEF1A1P20, MTCO3P22, CHD1, MTCO2P22, SLCO4C1, GIN1, MTND3P19, PDZPH1P, FBXL17	Up-regulated
chr5q22_up	0.526813	0.809737	0.293748	0.959136	4066	38	WDR36, STARD4, ATG12, AP3S1, REEP5, PGGT1B, SNORA13, EPB41L4A-AS1, SRP19, HMGN1P14, FEM1C	Up-regulated
chr5q23_up	0.74523	0.919949	0.232257	0.835053	6209	66	SLC12A2, HSPE1P10, KRT18P16, RPS14P8, TEX43, PRRC1, MGC32805, BOLA3P3, CEP120, RPL35AP15, PTMAP2, KDELC1P1, RPS17P2, LYRM7, SRFBP1, ISOC1, FAM170A, KRT8P33, ALDH7A1	Up-regulated
chr5q31_up	0.154622	0.448229	0.290906	1.17922	1456	182	VDAC1, RPL12P21, HSPA9, TMCO6, FAM53C, CDKL3, SPRY4, PAIP2, NDUFA2, KIF20A, HNRNPA0, CDC25C, SMAD5, UBE2B, HSPD1P18, PCBD2, CCNI2, SIL1, HSPA4, CAMLG, GNPDA1, HARS2, RPL7P19, UQCRQ, NDFIP1, SLC25A48, TCF7, RPL7P21, CTNNA1, ANKHD1, DIAPH1, MTND4LP30, TIFAB, ZCCHC10, CXXC5, HINT1, CYSTM1, ATP6V0E1P1, MTCYBP18, LEAP2, PKD2L2, RAD50, PROB1, IRF1, PPP2CA	Up-regulated
chr5q33_up	0.412002	0.70395	0.284611	1.03814	3473	73	PTTG1, MRPL22, UBLCP1, RBM22, RPS14, LARP1, TTC1, SLC36A2, GAPDHP40, CCNJL, CNOT8, C1QTNF2, GM2A, FABP6, KIF4B, SLU7, ATOX1, GEMIN5, G3BP1, GALNT10, GPX3, MED7, ZNF300, THG1L, NMUR2, HAVCR1, RPLP1P6, FAT2, NIPAL4	Up-regulated
chr5q34_up	0.784951	0.931175	0.270199	0.775323	5653	21	RPL7P20, FBLL1, CCNG1, MAT2B, PANK3	Up-regulated
chr5q35_up	0.100043	0.33962	0.310049	1.23712	925	152	GAPDHP71, NOP16, PRELID1, TSPAN17, RPL26L1, NPM1, KIAA1191, NIFKP2, LMAN2, CANX, GRM6, HNRNPH1, SUMO2P6, RNF44, RPL23AP45, ATP6V0E1, DDX41, KRT18P41, MAPK9, DOCK2, MGAT4B, PIGFP1, RNF130, MXD3, NSD1, ERGIC1, NHP2, RPS15AP18, FAF2, SCGB3A1, SPDL1, RPL12P22, CNOT6, ZNF879, HNRNPAB, SQSTM1, RAB24, CLK4, ZNF346, SIMC1, CBY3, SNORA74B, PRR7-AS1, NKX2-5, SNORD95, FOXI1, KLF3P1, PRMT1P1, STC2, RMND5B, T…	Up-regulated
chr6p21_up	0.00620612	0.0536602	0.32035	1.35442	60	352	GLO1, PFDN6, HSP90AB1, SNORA38, RPL7P25, CYCSP55, RNF8, NEU1, SLC29A1, EHMT2, RPL10A, PPIAP9, RPL7P4, KCTD20, RPL12P1, SNRPC, RPS18, RPL12P47, NFKBIE, CLIC1, TBC1D22B, TAP1, TCF19, ATP6V1G2-DDX39B, RPL24P4, HSPA1A, MAPK13, RPS10-NUDT3, ATF6B, MTCH1, HMGA1, DDX39B, RPS10, TREML3P, RPL35AP4, LY6G5B, FANCE, RPS2P28, ADCY10P1, PTMAP1, SPATS1, LYPLA2P1, POU5F1, UQCC2, CCHCR1, CUTA, HSPA1B, LSM2, MRPS1…	Up-regulated
chr6p22_up	0.879962	0.978579	0.19539	0.803039	8422	216	RANP1, TRIM27, DEK, ASS1P1, RPL13P, E2F3, RPL7P26, OR2W4P, UBD, RPSAP2, MRS2, TOB2P1, NUP153, PPIAP29, MICG, NOP56P1, C6orf62, KRT8P43, OR2E1P, HCG15, BTN3A2, HFE, TRIM31, LARP1P1, PAIP1P1, TRIM39-RPP21, BTN2A2, MICC, SUMO2P1, DDX39BP1, HCG9, HLA-G, ZFP57, MYLIP, HLA-U, KDM1B, OR11A1, ZSCAN16, SPTLC1P2, BOLA2P3, RPL7AP7, HNRNPA1P58, MCCD1P1, VN1R13P, RPP21, HLA-J, HLA-L	Up-regulated
chr6p24_up	0.314865	0.607623	0.333105	1.10732	2454	42	TMEM14C, EEF1E1, RPL15P3, PAK1IP1, RIOK1, HNRNPLP1, TMEM14B, BLOC1S5, SLC35B3, SSR1, SNRNP48, MRPL48P1, DSP, ELOVL2-AS1, MAK	Up-regulated
chr6p25_up	0.241039	0.545509	-0.261981	-1.12192	463	52	F13A1, HUS1B, RIPK1, LY86-AS1, IRF4, PXDC1, ECI2, FAM217A, DUSP22, HTATSF1P2	Down-regulated
chr6q13_up	0.681532	0.892565	0.260949	0.863883	5302	41	RPL37P15, RPL39P3, RPS27P15, FAM135A, SLC17A5, LYPLA1P3, SLC25A6P6, EEF1A1, TXNP7, LMBRD1	Up-regulated
chr6q14_up	0.127997	0.402723	0.356515	1.2673	1056	61	TTK, UBE3D, COX7A2, SYNCRIP, PHIP, PGM3, IRAK1BP1, IBTK, GAPDHP63, CYB5R4, MYO6, RPL7P27, RPL17P25, NDUFA5P9, SH3BGRL2, DBIP1, SMARCE1P2, CEP162, SENP6, LCAL1	Up-regulated
chr6q15_up	0.330443	0.617838	0.344498	1.10066	2514	34	PM20D2, ORC3, DNAJC19P6, RRAGD, RARS2, MDN1, CFAP206, NACAP7, SRSF12, SLC35A1, GABRR1, MTND4LP19, TUBB3P1, MTCO1P56	Up-regulated
chr6q16_up	0.917796	0.994922	0.207095	0.679694	7111	39	CCNC, RPS7P8, FBXL4, COQ3, NDUFAF4, ACTG1P18, MMS22L, USP45, ATF1P1, EEF1GP6, POU3F2, UFL1, HACE1, TSTD3, SIM1, FAXC	Up-regulated
chr6q21_up	0.00343928	0.042254	0.444339	1.62075	28	73	BRD7P4, RPF2, RPL35P3, PPIL6, AMD1, HDAC2, CDC40, PREP, GTF3C6, OSTM1, TUBE1, SNX3, ATG5, SMPD2, QRSL1, NR2E1, RPSAP43, RPL21P65, CDK19, PDSS2, SLC22A16, ZBTB24, MICAL1	Up-regulated
chr6q22_up	0.977265	0.999897	0.17288	0.637522	8338	79	CBX3P9, TRMT11, TPD52L1, CENPW, NT5DC1, FRK, RPL23AP48, HDDC2, NUS1, YWHAZP4, ECHDC1, PRELID1P1, CLVS2, COL10A1, ARHGAP18, RPS4XP9, RNF146, NCOA7, VGLL2	Up-regulated
chr6q23_up	0.341615	0.620681	0.292313	1.07795	2914	79	PERP, HBS1L, MYB, TBPL1, FAM8A6P, RPL21P67, TMEM200A, SNORA33, SLC2A12, RPL23AP46, BCLAF1, SMLR1, ENPP1, NHEG1, HSPE1P21, MYB-AS1, OR2A4, RPL35AP3, RPS12, BTF3L4P3, MTCYBP4, EPB41L2, PEX7, MAP7, SLC18B1, RPL21P66, ENPP3, AHI1	Up-regulated
chr6q24_up	0.457283	0.746703	0.295512	1.00535	3628	47	LTV1, ADAT2, FUCA2, MARCKSL1P2, EPM2A, YAP1P1, TPT1P4, PHACTR2, HEBP2, HECA	Up-regulated
chr6q25_up	0.800762	0.931175	0.213464	0.820861	7141	108	MRPL18, SLC22A3, PHBP1, ARMT1, RMND1, FBXO5, NUP43, RPS4XP8, EZR, TCP1, PCMT1, ZBTB2, GTF2H5, AMZ2P2, SYNJ2, HMGB3P19, RAET1M, HSPD1P16, OSTCP1, SYTL3, RSPH3, ACAT2, RPSAP40, RPS18P9, RAET1E, WTAP, LPAL2, LATS1, IGF2R, LRP11, SUMO4, TFB1M, MTCO2P31, BTF3P10, ULBP2, IYD, ULBP3, SCAF8, CCT7P1, PPIL4, TAB2, SRP72P2	Up-regulated
chr6q27_up	0.759372	0.924142	-0.21177	-0.840296	1741	37	C6orf120, CCR6, OR4F7P, RPS6KA2, TCP10L2, KIF25-AS1, MPC1, VTA1P1, RPS6KA2-IT1, KIF25, WBP1LP8, RPL12P23, RPS6KA2-AS1, DACT2	Down-regulated
chr7p11_up	0.107589	0.355873	0.376924	1.3059	868	52	CCT6A, MRPS17, SEC61G, RPL31P35, SNORA15, LANCL2, CHCHD2, NUPR2, SLC25A5P3, MTCYBP5, CALM1P2, EGFR, PSPHP1, PHKG1, GUSBP12, VN1R28P, BSNDP4	Up-regulated
chr7p12_up	0.568135	0.837354	0.285734	0.932969	4385	38	HAUS6P1, POM121L12, CICP17, RPL7L1P2, FTLP15, DDC, HAUS6P3, IGFBP3, COBL, CICP20, RNF138P2, DDX43P2, ZPBP, VWC2, FIGNL1, TNS3	Up-regulated
chr7p13_up	0.252218	0.546144	0.361063	1.16647	1932	36	NUDCD3, SNORA5A, PPIA, YKT6, SNORA5C, PURB, POLD2, URGCP, COA1, ELK1P1, PGAM2, POLR2J4, TBRG4, UBE2D4, STK17A, SNORA9, MRPS24, ZMIZ2, OGDH, TMED4, NACAD	Up-regulated
chr7p14_up	0.015551	0.105583	0.38104	1.45773	137	104	ANLN, GGCT, PSMA2, RP9P, LSM5, RALA, TCP1P1, RP9, DPY19L1P2, MTURN, DPY19L1P1, AOAH, SLC25A5P5, NPM1P18, ZNRF2P1, FKBP9, MRPL32, NT5C3A, VPS41, RWDD4P2, PLEKHA8, EPDR1, AVL9, ZNRF2P2, CHN2, S100A11P2, INHBA, KBTBD2, SUGCT, TRGVA, POU6F2-AS1, DPY19L1, CDK13	Up-regulated
chr7p15_up	0.00201661	0.0318519	0.45808	1.66738	16	72	MPP6, TRA2A, CBX3, RPL12P10, MALSU1, EIF4HP1, RPL35P4, HOXA13, STEAP1B, NHP2P2, HNRNPA2B1, FAM221A, CYCS, NFE2L3, TOMM7, HOXA10, SNX10, TAX1BP1	Up-regulated
chr7p21_up	0.0563035	0.227212	0.396335	1.39239	459	57	MACC1, NDUFA4, BZW2, RPA3, HSPA8P8, RPL6P21, RPL36AP26, RPL23AP52, EEF1A1P26, MIOS, ICA1, EEF1A1P27, RAD17P1, RPL36AP29, PHF14, BRWD1P3, SNX13	Up-regulated
chr7p22_up	0.00045819	0.0131348	0.457729	1.72144	3	90	ELFN1-AS1, GET4, C1GALT1, EIF2AK1, RBAK-RBAKDN, ZDHHC4, ZFAND2A, ZNF12, AIMP2, RAC1, OCM, PMS2, RNF216P1, CYP3A54P, DNAAF5, RBAK, WIPI2, DAGLB, FAM86LP, USP42, ZNF853, CCZ1, KDELR2, PMS2CL, CYTH3, RPSAP73, GPER1, CCZ1B, OR7E39P, OR10AH1P, UNC93B2, EIF3B, ACTB, SUN1, ZNF316, AMZ1, FSCN1, TNRC18, ADAP1, AP5Z1, OR7E59P, RNF216, GRID2IP	Up-regulated
chr7q11_up	0.000106872	0.00557536	0.435307	1.75429	0	169	CCT6P1, VKORC1L1, MLXIPL, LIMK1, PMS2P3, MDH2, ZNF736, POM121, RFC2, TMEM60, ZP3, PMS2P10, ZNF107, ZNF138, CCT6P3, PMS2P4, RABGEF1, EIF4H, STAG3L2, POM121C, ZNF92, SBDSP1, POMZP3, GTF2IRD1, APTR, POM121B, TBL2, TMEM248, SBDS, PMS2P7, ERV3-1, PMS2P2, DNAJC30, TRIM73, STAG3L3, PMS2P9, TMEM120A, RPL35P5, CLDN4, STYXL1, NSUN5P2, GTF2IP1, STAG3L1, GTF2IRD2, VPS37D, GUSB, VN1R40P, LAT2, AUTS2, NSUN5, P…	Up-regulated
chr7q21_up	0.375543	0.668208	0.272334	1.05432	3368	115	CYP51A1, PON2, SLC25A13, CLDN12, DBF4, KRIT1, RPS3AP29, LMTK2, TMEM243, BET1, GTPBP10, CDK6, ASNS, GATAD1, SRI, TMBIM7P, FAM133B, ANKIB1, RUNDC3B, SDHAF3, HNRNPA1P8, MAGI2-AS1, EEF1A1P28, RPS3AP26, SEMA3C, EIF4A1P13, DYNLL1P7, OR7E38P, DLX6-AS1, AKAP9, SNRPBP1, TAC1, RBM48	Up-regulated
chr7q22_up	0.000107643	0.00557536	0.455978	1.82446	0	156	ARMC10, DNAJC2, ORC5, BUD31, SYPL1, PMS2P1, MOSPD3, DUS4L, BAIAP2L1, PTCD1, PMPCB, HBP1, RPSAP46, PUS7, FAM200A, FIS1, ZNHIT1, ZKSCAN1, CPSF4, EPHB4, VGF, PSMC2, MEPCE, CBLL1, ARPC1A, COG5, POLR2J, LAMTOR4, ZNF3, ZNF789, POLR2J3, SMURF1, POP7, CCDC71L, AZGP1, YBX1P2, ARPC1B, MCM7, MUC17, MUC3A, SRRT, LRCH4, RWDD4P1, SLC26A5, UFSP1, GNB2, RPL7P60, CYP3A5, AGFG2, AZGP1P2, AP4M1, RASA4, NFE4, PDAP1,…	Up-regulated
chr7q31_up	0.546665	0.824793	0.256283	0.961628	4761	88	LSM8, MET, LSMEM1, IFRD1, NDUFA5, EEF1GP1, RPL7P32, ZNF800, IMMP2L, CFTR, CAPZA2, WNT2, TES, EIF3IP1, CADPS2, DNAJB9, THAP5, ANKRD7, FEZF1-AS1, CTTNBP2	Up-regulated
chr7q32_up	0.013633	0.0950626	0.43942	1.53618	110	55	MKLN1-AS, SMKR1, METTL2B, CEP41, ATP6V1F, RBM28, UBE2H, KLHDC10, HILPDA, MKLN1, OPN1SW, SNRPGP3, PAX4, TMEM209, CICP14, STRIP2, MEST, SND1, CPA2, CPA5, PRRT4, TNPO3, COPG2	Up-regulated
chr7q33_up	0.643221	0.867635	0.28725	0.879908	4791	28	CHCHD3, KRT8P51, TRIM24, SDHDP2, SLC35B4, LRGUK	Up-regulated
chr7q34_up	0.657193	0.873999	0.231721	0.915155	6011	139	PARP12, MGAM2, SSBP1, KDM7A, MKRN1, MRPS33, TRBV10-1, NDUFB2, TRBV5-4, ZC3HAV1L, GSTK1, OR9A1P, TRBV12-3, MOXD2P, ERHP1, TMEM139, FAM131B, TRPV6, TAS2R4, CASP2, TRBV5-5, TRBV6-6, TAS2R3, BRAF, TRBJ1-4, TRBV8-2, TAS2R6P, TRBV16, NDUFB2-AS1, MTRNR2L6, MZT1P2, TRBV24-1, SLC37A3, PRSS3P3, CLEC2L, TTC26, TRBV6-7, UBN2, MGAM, PPP1R2P6, ADCK2, KIAA1549, TBXAS1, TRBVA, TRBV7-9	Up-regulated
chr7q35_up	0.651706	0.871193	-0.218418	-0.90834	1393	45	OR2AO1P, OR2A3P, DUTP3, CTAGE15, OR2A15P, TAS2R41, TPK1, OR2A41P, OR2A25, OR2F1	Down-regulated
chr7q36_up	0.000680426	0.017555	0.444131	1.68746	5	98	EZH2, XRCC2, THAP5P1, TMUB1, PDIA4, INSIG1, ACTR3B, NCAPG2, CUL1, RHEB, ZNF282, NOM1, NPM1P12, PRKAG2, NUB1, ABCF2, SLC4A2, ZNF767P, MNX1-AS2, TMEM176A, GBX1, LMBR1, DNAJB6, UBE3C, ZNF467, ZNF783, KRBA1, AGAP3	Up-regulated
chr8p11_up	0.11571	0.372205	0.35398	1.27881	969	68	RAB11FIP1, EIF4EBP1, ERLIN2, POLB, GPAT4, DDHD2, SMIM19, RNF170, ASH2L, RNF5P1, VDAC3, RPL5P23, IDO1, HGSNAT, FNTA, AP3M2, CHRNA6, BAG4, PLPP5, ADAM9, HTRA4, HOOK3	Up-regulated
chr8p12_up	0.332866	0.617838	0.326312	1.09537	2612	44	MAK16, SNORD13, TTI2, RPS15AP24, RPL10AP3, MBOAT4, SARAF, DCTN6, GTF2E2, RPL17P33, UBXN8, SUMO2P16, RPL23P10, FUT10, WRN, DUSP26, DUSP4, RNF122	Up-regulated
chr8p21_up	0.369497	0.666645	-0.216018	-1.03811	469	90	ADAM28, ADAMDEC1, R3HCC1, PNOC, EXTL3-AS1, CHMP7, SDAD1P1, CLU, NEFM, TNFRSF10C, EBF2, CSGALNACT1, SORBS3, RHOBTB2, DMTN, SCARA5, NPM2, NEFL	Down-regulated
chr8p22_up	0.0764107	0.269167	-0.371502	-1.37066	194	28	MICU3, TUSC3, SGCZ, MTUS1, DLC1, PSD3, PDGFRL, NATP, MSR1, MTND4P7, MRPL49P2, MTND4LP26	Down-regulated
chr8p23_up	0.332531	0.617838	0.272653	1.07667	3040	138	FAM86B1, OR7E10P, RPL19P13, RPS3AP33, DEFB107B, PINX1, FAM90A25P, SNRPCP15, OR7E158P, AGPAT5, HSPD1P2, FAM86B2, C8orf49, FAM90A2P, DEFB4A, KBTBD11, MSRA, DEFA1, DEFA1B, ALG1L11P, FDFT1, CLDN23, CTSB, RPS3AP34, FAM90A10P, ENPP7P6, PAICSP4, OR7E96P, PPP1R3B, DEFA10P, SUB1P1, RPS3AP30, FAM85B, ERI1, FAM66D, SOX7, DEFA9P, DEFA3, CLN8, RPS3AP35, OR7E15P	Up-regulated
chr8q11_up	0.024547	0.147282	0.456025	1.50969	190	41	LYPLA1, PXDNL, UBE2V2, SPIDR, PRKDC, TCEA1, EFCAB1, OPRK1, PSAT1P1, PCMTD1, MRPL15, ATP6V1H, RPL34P17, RB1CC1, NDUFA5P12	Up-regulated
chr8q12_up	0.0559054	0.227212	0.427422	1.415	434	41	GGH, NPM1P21, RAB2A, NPM1P6, TTPA, KRT8P3, RPS20, SBF1P1, ASPH, CHCHD7, SDCBP, TMEM68, NSMAF, IFITM8P, XRCC6P4, SDR16C5, TGS1, PLAG1, RPL37P6, RPL30P10, LYN, UBXN2B	Up-regulated
chr8q13_up	0.00139896	0.0257808	0.523085	1.7634	10	45	LACTB2, RRS1, PTTG3P, SLCO5A1, SNORD87, ARFGEF1, CSPP1, NCOA2, TRAM1, RPL31P41, XKR9, SGK3, MCMDC2, RPS15AP25, DNAJC5B, SULF1, MTFR1, ARMC1, BTF3P12, TCF24	Up-regulated
chr8q21_up	0.00623955	0.0536602	0.391805	1.51883	55	116	CKS1BP7, RPL7, RPSAP47, ZFAND1, TERF1, E2F5, RMDN1, CHMP4C, RIPK2, OSGIN2, FTH1P11, TMEM64, RPSAP74, HNF4G, UBE2W, RDH10, IMPA1, PEX2, CPNE3, HNRNPA1P36, NTAN1P2, HEY1, CA13, HIGD1AP18, MRPS16P1, JPH1, TMEM70, STAU2, FABP5, MRPS28, COX6B1P6, REXO1L5P, WWP1, CASC9, HMGB1P41, OTUD6B, PKIA-AS1, UBE2HP1, SNX16, PRR13P7, RPS26P34, DECR1, NBN	Up-regulated
chr8q22_up	0.000456569	0.0131348	0.46281	1.7499	3	94	RAD54B, HSPE1P14, NDUFAF6, PTDSS1, PDP1, INTS8, STK3, RPS12P15, YWHAZ, LAPTM4B, NIPAL2, POP1, RBM12B-AS1, COX6C, SLC25A32, UQCRB, AZIN1, TRIQK, DPY19L4, ANKRD46, ESRP1, FZD6, ZNF706, RPL30, ATP6V1C1, POLR2K, TMEM67, RRM2B, CDH17, CCNE2, MTERF3, DCAF13, SUMO2P18, RPL5P24, UBR5, C8orf37, RPS26P6, GRHL2, SPAG1, VPS13B, UBR5-AS1, RPS4XP10	Up-regulated
chr8q23_up	0.266304	0.557126	0.371216	1.15838	2008	30	EIF3E, ENY2, TAGLN2P1, EBAG9, EMC2, OXR1, SYBU, RPL12P24, NUDCD1, TRPS1	Up-regulated
chr8q24_up	0.000418235	0.0131348	0.381943	1.56822	3	212	RPL8, ATAD2, TATDN1, PVT1, RPL35AP19, FAM91A1, SLC39A4, UBA52P5, MYC, MRPL13, MAL2, PTK2, RNF139, FAM83H, TAF2, TBC1D31, ZHX1-C8orf76, EIF3H, DGAT1, BOP1, VPS28, CYC1, FBXL6, EPPK1, CHRAC1, MINCR, C8orf33, NDUFB9, TMEM249, TMEM75, ZNF623, SAMD12, RECQL4, RHPN1-AS1, CASC19, SLC45A4, SCRIB, HSF1, ZNF251, SQLE, LY6E, GSDMC, SNTB1, IMPDH1P6, DSCC1, C8orf76, RHPN1, THEM6, DERL1, ZNF572, MROH4P, ZFP41,…	Up-regulated
chr9p11_up	0.491133	0.777377	-0.268953	-0.976273	1273	26	CNTNAP3B, IGKV1OR9-2, SNX18P8, GXYLT1P3, CNN2P4, SDR42E1P2, SPATA31A6, PGM5P2, SNX18P5, FAM95B1, CYP4F60P, ADGRF5P2, PTGER4P2-CDK2AP2P2	Down-regulated
chr9p13_up	0.705727	0.892891	0.226131	0.888104	6419	131	MELK, STOML2, POLR1E, SUGT1P1, DNAI1, YBX1P10, ALDH1B1, RPP25L, ZCCHC7, GRHPR, TOMM5, EXOSC3, PRSS3, DCAF12, ARHGEF39, UNC13B, CA9, ANXA2P2, FANCG, VCP, VN1R48P, TRMT10B, C9orf131, HINT2, TRBV29OR9-2, IL11RA, SIGMAR1, SNX18P7, UBAP1, YWHABP1, RMRP, CREB3, FAM221B, NOL6, TUBB4BP2, PIGO, TLN1, ANKRD18A, GBA2, RPL36AP33, OR13C7, YWHAZP6, CNTFR-AS1, NPR2, KIF24	Up-regulated
chr9p24_up	0.40453	0.701977	0.285815	1.04253	3410	73	RPL4P5, GLIS3-AS1, CBWD1, RPL23AP57, SNRPEP2, RPS3AP54, RPL12P25, CD274, PUM3, VLDLR, PLGRKT, PRELID3BP11, PLPP6, PPIAP33, MTCO2P11, PDSS1P1, RCL1, INSL4, IGHEP2, DMRT3, RNF2P1, RLN2, RANBP6, ERMP1, TPD52L3, DDX11L5, KLF4P1, MTND4P14	Up-regulated
chr9q13_up	0.860068	0.968985	-0.20844	-0.749421	2267	25	GXYLT1P6, SNX18P9, MYO5BP3, CNTNAP3P1, PTGER4P3, IGKV1OR-2, AQP7P4	Down-regulated
chr9q21_up	0.527271	0.809737	0.248927	0.977829	4794	132	PIP5K1B, CBWD3, CBWD5, BMS1P12, UBQLN1, LYPLA2P3, HNRNPK, PIGUP1, PSAT1, RPSAP75, C9orf153, CARNMT1, GCNT1, PHBP7, PCA3, FRG1KP, RMI1, KRT18P24, OSTF1, SPATA31B1P, TMC1, RPL35AP21, IDNK, TJP2, KIF27, FAM122A, RASEF, RFC5P1, ZFAND5, UBE2V1P10, RPSAP9, RORB-AS1, HSPB1P1	Up-regulated
chr9q22_up	0.043488	0.207776	0.348695	1.34645	389	112	CKS2, RPSAP49, SYK, NOL8, SPTLC1, OR7E109P, CDC14B, TRMO, MFSD14B, TSTD2, FBP1, MFSD14C, ANKRD19P, ANP32B, ANKS6, XPA, CORO2A, SECISBP2, SEC61B, RPS10P3, SNORA84, SUSD3, OR7E116P, NANS, HSPE1P22, SHC3, FAM220CP, ZNF484, OR7E31P, ZNF782, TDRD7, ECM2, SPATA31C2, ALG2, GAS2L1P2, NXNL2, IPPK, BICD2, PTPDC1, UNQ6494, YRDCP2, CTSV, FANCC, ASPN, PTCH1, HNRNPA1P14, MTATP6P29, GALNT12, VDAC1P11, OR7E108P,…	Up-regulated
chr9q31_up	0.780044	0.931175	0.222511	0.823728	6691	81	YBX1P6, TXN, TEX10, MRPL50, RPL36AP6, GAPDHP26, MSANTD3, DNAJC25-GNG10, GNG10, TMEM245, TMEM38B, SMC2, UPF3AP3, ERP44, RAD23B, RPS2P35, TRMT112P4, OR13C8, STX17, PTGR1, PTPN3, FSD1L, C9orf152, DNAJC25, OR13I1P, NIPSNAP3A, LRRC37A5P, MTND3P4, STX17-AS1, INVS, RPL36AP35, CTNNAL1, EPB41L4B	Up-regulated
chr9q32_up	0.267766	0.557126	0.359232	1.15425	2045	35	HSPE1P28, SLC31A1, CDC26, PTBP3, FAM225B, HSDL2, POLE3, KIAA1958, KIF12, AMBP, ATP6V1G1, INIP, WDR31, SNX30, ALAD, ORM2, ZFP37, PRPF4, COL27A1	Up-regulated
chr9q33_up	0.232025	0.536425	0.30283	1.15059	2045	98	DENND1A, RPL35, STRBP, ARPC5L, RPL12, RBM18, SKA2P1, GARNL3, BRINP1, OR1B1, PSMB7, MRRF, ZBTB26, SNORA65, MEGF9, NR5A1, TTLL11, OR1J4, SNORD90, PPP6C, OLFML2A, PHF19, RAB14, HSPA5, RPL35AP22, NEK6, OR1L4, OR1N2, TPT1P9, RABEPK, RC3H2, RALGPS1	Up-regulated
chr9q34_up	0.062422	0.234584	0.302855	1.25037	599	228	EXOSC2, SNORD36C, LCN8, SNORD36A, PTGES2-AS1, DPM2, WDR5, CCDC183, CIZ1, C9orf116, URM1, ASS1, ST6GALNAC4, SET, NTMT1, LRRC8A, EEF1A1P5, RPL7A, RAPGEF1, CELP, NUP214, AGPAT2, LCN10, MED27, DOLK, STXBP1, NDOR1, TOR1B, SOHLH1, CACNA1B, FAM102A, NUP188, DPP7, SETP5, PMPCA, TMEM210, CEL, IER5L, SH2D3C, LCN2, ENTPD2, TOR1A, DDX31, TUBB4B, RALGDS, TOR2A, RNF224, FCN1, CLIC3, SNAPC4, TMEM141, TPRN, OBP2…	Up-regulated
chrXp11_up	0.868052	0.973728	0.197622	0.816883	8354	232	NDUFB11, RPS2P55, KRT8P14, PLP2, RPSAP61, JADE3, GAPDHP1, GAPDHP65, ZNF81, FOXP3, BCOR, UBA1, UXT, ZXDA, SLC38A5, GNL3L, PQBP1, MTND2P24, MED14, FTSJ1, FAM156B, DYNLT3, ZNF182, SHROOM4, USP9X, ELK1, CHTF8P1, EBP, MKI67P1, RBM10, ZNF157, SALL1P1, CACNA1F, FAM156A, MAGED4B, MAGEH1, MTHFD1P1, PGAM4P1, SLC35A2, CCDC120, RBM22P6, RP2, XAGE2, IMPDH1P4, CASK, WDR45, SUV39H1, CHST7, KDM5C-IT1, RPL23AP83,…	Up-regulated
chrXp21_up	0.722236	0.904548	0.244673	0.840656	5787	50	RPL7P58, TAB3, CKS1BP6, NPM1P8, RPS15AP40, FAM47A, GK	Up-regulated
chrXp22_up	0.984913	0.999897	0.167132	0.673061	9204	168	POLA1, KRT18P53, GEMIN8, APOO, SCML1, ASS1P4, EEF1B2P3, PDK3, SCML2, PDHA1, RPL30P15, EIF1AX, RPL6P30, SYAP1, PNPLA4, FANCB, GYG2-AS1, TRAPPC2, TMSB10P2, ASMT, SMS, REPS2, GPX1P1, CD99P1, PRPS2, HAUS1P2, PSMA6P2, ZBED1, SNRPEP9, MAP3K15, RBBP7, HCCS, ARSH, S100G, SLC25A6	Up-regulated
chrXq11_up	0.999861	0.999897	0.12653	0.363072	7201	21	SPIN4, ZC3H12B, MTND2P25, ZC4H2, GRPEL2P2, KRT8P27, BTF3P8	Up-regulated
chrXq12_up	0.152327	0.446594	-0.402535	-1.27221	454	16	VSIG4, FRMD8P1, MSN, AR, AKIRIN1P2, EIF4BP9	Down-regulated
chrXq13_up	0.619031	0.854065	0.242655	0.926307	5483	102	RPS7P14, RPL21P134, NONO, RLIM, TOMM20P4, PBDC1, RPS23P8, OGT, IGBP1, MTCYBP31, RPS4X, RPL31P63, HMGN1P35, ABCB7, JPX, FTX, HNRNPA1P25, PIN4, MAP2K4P1, EFNB1, SNX12, CNOT7P1, AWAT1, CDX4, PHKA1, ERCC6L, RPS26P11, NLGN3, GJB1, SEPHS1P4, SOCS5P4, NUTF2P7, OTUD6A, KIF4A, BRAFP1, PDZD11	Up-regulated
chrXq21_up	0.44319	0.736504	-0.2125	-1.00936	588	85	HMGN1P34, GPR174, BRDTP1, SFR1P2, KIF4CP, DIAPH2-AS1, ITM2A, UBE2V1P7, FGF16, ST13P18, ZNF711, KLHL4, FAM133A, CYSLTR1, ATP7A, LPAR4, P2RY10, CCNB1IP1P3	Down-regulated
chrXq22_up	0.577778	0.839547	-0.191317	-0.961457	571	120	ZMAT1, TMSB15A, SERPINA7P1, BEX1, RPSAP59, MTND6P13, BEX4, IL1RAPL2, ARMCX1, TEX13B, TMSB15B, NCBP2L, TSC22D3, NAP1L4P2, TCEAL4, ARL13A, TCEAL7, TEX13A, VSIG1, MID2, MTND6P32	Down-regulated
chrXq23_up	0.833766	0.958904	-0.192601	-0.824803	1604	52	IL13RA2, CHRDL1, QTRT1P1, LRCH2, CAPN6, DPRXP7	Down-regulated
chrXq24_up	0.165361	0.46373	0.350363	1.23088	1350	57	UBE2A, RPL39, UPF3B, MCTS1, NKRF, HSPA8P1, C1GALT1C1, NDUFA1, RHOXF1P1, LAMP2, EEF1A1P30, NKAP, SLC25A5-AS1, NKAPP1, SLC25A5, PA2G4P1	Up-regulated
chrXq25_up	0.445328	0.736504	-0.270221	-1.00401	1119	29	GRIA3, TEX13D, TUBB4AP1, RPL3P12, DCAF12L2, XIAP-AS1, RPL7AP72, KRT18P44, CHCHD2P1, ACTRT1, TPT1P13, FERP1	Down-regulated
chrXq26_up	0.497634	0.782863	0.258795	0.990062	4415	104	ZDHHC9, STK26, PHF6, FAM122B, RBMX2, AIFM1, ZNF280C, ZFYVE9P1, ZNF75D, FIRRE, SLC9A6, RAC1P4, OCRL, SAGE1, UTP14A, TFDP3, MMGT1, STK24P1, HDGFP1, SLC25A14, HPRT1, ENOX2, HS6ST2	Up-regulated
chrXq27_up	0.297052	0.585034	-0.265719	-1.08688	654	42	CDR1, HNRNPH1P2, MAGEC1, SPANXA2, RPS17P17, MTND2P39, SPANXB1, FGF13, CXorf51A	Down-regulated
chrXq28_up	0.6284	0.861859	0.23504	0.929695	5752	141	BRCC3, DKC1, NAA10, NSDHL, LAGE3, EMD, GABRE, RPL7L1P11, CETN2, RPL12P50, VBP1, VMA21, IDH3G, OPN1MW, HMGB3, F8A2, DUSP9, XRCC6P2, IRAK1, CMC4, RPL18AP16, RPL10, OPN1LW, ATF4P1, TAZ, EEF1A1P31, CYCSP45, WASH6P, RPL19P21, MAGEA11, FTH1P8, PLXNA3	Up-regulated
chrYp11_up	0.0371867	0.184503	-0.27119	-1.31763	45	95	SRY, TTTY11, ZNF92P1Y, MTND2P3, HSFY3P, TSPY2, SERBP1P2, PCDH11Y, RBMY2HP, TSPY20P, RBMY2JP, TSPY5P, GOT2P5, RBMY2GP, TSPY17P, ZNF736P8Y, NAP1L1P2, TTTY12, FAM197Y1, OFD1P3Y, TSPY16P, TTTY23, TSPY25P, ZNF736P6Y, SRIP3, RPL26P37, FAM197Y6, TTTY20, USP12PY, ZFY-AS1, TSPY24P, CDY3P, USP9YP22, TTTY22, RNF19BPY	Down-regulated
chrYq11_up	0.00246914	0.0318519	-0.29537	-1.61666	0	227	OFD1P13Y, USP9YP6, USP9YP11, RBMY2EP, CDY18P, CDY4P, XKRYP4, USP9YP34, DPPA2P1, BPY2C, CDY22P, PRYP2, TRIM60P9Y, SNX18P1Y, NLGN4Y-AS1, USP9YP8, USP9YP7, TRIM60P5Y, TRIM60P8Y, TRIM60P11Y, CDY7P, TRIM60P10Y, CDY14P, USP9YP32, HSFY2, XKRYP5, RBMY1J, RBMY2AP, FAM224B, RBMY2UP, ACTR3BP1, PRYP1, HSFY8P, HSFY7P, RBMY2YP, RBMY2BP, USP9YP19, XKRYP6, USP9YP36, USP9YP25, CDY17P, TTTY4, CDY23P, CDY12P, CASKP…	Down-regulated

## Sheet: CT_C2
pathway	pval	padj	ES	NES	nMoreExtreme	size	leadingEdge	Enrichment
ABBUD_LIF_SIGNALING_1_up	0.996433	0.998138	0.151917	0.500329	7821	40	FBP1, TMEM176A, LCN2, IRF1, CEBPB, TSPAN4, SCT, GPCPD1, GPX3, FGG	Up-regulated
ABBUD_LIF_SIGNALING_1_dn	0.913421	0.953679	0.221523	0.672394	6730	27	ITGA6, REXO2, OSTF1, DDC, ALCAM, CD24, HOXC9, ANKRD40, DCAF11, SYTL4, GRIA2, CXorf56, FOXA2, PELI1	Up-regulated
ABDELMOHSEN_ELAVL4_TARGETS_up	0.658083	0.786998	0.324437	0.861921	4599	15	PARP1, CAB39, RAB10, EIF2AK2, CASP3, ITGB1, KMT5A, LEPROTL1, RHOA	Up-regulated
ABE_INNER_EAR_up	0.206879	0.364712	0.362684	1.19917	1629	41	RPL21, RPS5, RPL35, C19orf53, RPS15, RPS11, UBA52, MT3, S100A13, RPL28, RPL32, USH1C	Up-regulated
ABE_VEGFA_TARGETS_up	0.0106823	0.0359434	-0.53266	-1.74085	30	18	RCAN1, CDR1, EGR2, ANGPT2, PLPP3, A2M	Down-regulated
ABE_VEGFA_TARGETS_2HR_up	0.181096	0.331313	-0.313979	-1.19827	432	32	RCAN1, CDR1, ELAVL4, PLPP3, DAPK3, AURKC, TNFRSF14, PDCD1, NR4A1	Down-regulated
ABE_VEGFA_TARGETS_30MIN_up	0.188758	0.341725	-0.327331	-1.20312	496	27	RCAN1, ELAVL4, EGR2, EGR1, HDC, AURKC, NR4A1, KRAS	Down-regulated
ABRAHAM_ALPC_VS_MULTIPLE_MYELOMA_up	0.541493	0.699352	-0.261604	-0.948724	1428	26	CXCL12, FGFR1, NFKB1, FAS, A2M, DCN, MAPK12, SERPINA1	Down-regulated
ABRAHAM_ALPC_VS_MULTIPLE_MYELOMA_dn	0.0610591	0.147778	0.508021	1.44952	436	20	MYC, CCNB1, TXN, CD47, XRCC5, XRCC4, CDK4, CASP3, UCHL1, PTEN, CDK5	Up-regulated
ABRAMSON_INTERACT_WITH_AIRE_up	0.00012692	0.00109167	0.628944	2.07952	0	41	C1QBP, TOP2A, NOP56, SMC3, MYBBP1A, SRSF2, XPO1, PCNA, NUP93, SNRPB, PRKDC, PARP1, SUPT16H, RUVBL2, SRSF1, SRSF3, MSH2, IPO7, POLR2B, NASP, CAND1, RANBP9, TRIM28	Up-regulated
ACEVEDO_LIVER_CANCER_dn	0.457814	0.624391	0.236175	1.01189	4557	514	TMEM97, SCD, CERS6, SLC7A5, SERBP1, SAP18, PSMA2, LYRM1, GOT2, NDFIP2, EBPL, DGAT2, SDC4, RPF2, TGDS, ARL6IP1, EIF2AK1, FAM32A, HOOK1, MTRF1, RPUSD4, UPB1, DGAT1, AGMAT, ZNHIT1, INSIG2, ZCCHC14, KRT8, PSMF1, DNAJA1, EIF5A, RPL12, PLEK2, ANKRD46, SDHB, ITCH, EZR, UBXN6, PRKAG2, EXOSC6, FBP1, RNF115, ETS2, HMGCR, THOC2, CCND1, PCMT1, SARAF, ENO1, ERLIN1, OAT, AGPAT2, TMEM30B, L2HGDH, ADIPOR2, SOD1,…	Up-regulated
ACEVEDO_LIVER_CANCER_WITH_H3K27ME3_up	0.00330033	0.0139755	-0.294099	-1.62704	0	268	CLCA1, SSBP2, IL1RL1, CYTIP, PRKAR2B, STEAP4, TTN, PLPPR4, LCA5, MCOLN3, PDZD2, CACNB2, TMSB15A, ZNF471, ITIH5, SCIN, IL6, COLEC12, OSMR, LPAR3, USP51, CEP126, CR1L, TOX, GAPT, SLC12A6, IPCEF1, PTENP1, MAGEB2, ANGPTL5, PLA2G2A, GDF3, SYT14, ARHGDIB, LRCH2, MGP, PELI2, MAST4, CPB1, VWDE, CRISP2, CRB1, HSFX1, LRRC8C, PTPRR, NTF3, MSRB3, B3GALT5, HAUS5, IFNL1, PDE1A, NFIB, IFNA1, PRKACG, GABARAPL2, …	Down-regulated
ACEVEDO_LIVER_CANCER_WITH_H3K27ME3_dn	0.900718	0.946145	0.193172	0.77722	8400	168	ANLN, FRG1, POMP, CDKN2A, RHPN2, EIF3C, PLP2, PROX1, PLEKHH3, SPG21, AJUBA, NOMO2, NOMO3, FRG1BP, OR4C13, MRPL1, KIAA1143, CELF3, NOMO1, YAP1, OR4M2, KIF15, RALY, E2F7, GOLT1B, MYF6, MKRN9P, PDGFRB, USH1C, ULK1, KRTAP20-1, GGN, OR5L2, PP2D1	Up-regulated
ACEVEDO_LIVER_CANCER_WITH_H3K9ME3_up	0.00107411	0.0056764	-0.343665	-1.74534	0	130	CA1, NEB, GNG2, MEP1A, NOVA1, ANK2, ABCB5, CPQ, CACNB2, LPAR3, PPP2R3A, EBF4, CEP126, ABCA13, IPCEF1, ANGPTL5, ZDBF2, CLNK, NRAP, VWDE, KRT20, CLRN1, SMCP, IGSF11, KRT10, SPATA6, RFNG, OR6W1P, PGBD1, AMOTL1, ENOX1, CDY1, KCNK2, OR2F1, RPL13AP17, CCDC54, TRPM2, TNFSF12, FAT3, ARMC3, NAP1L2, THEMIS, LAMB4, MMP13	Down-regulated
ACEVEDO_LIVER_CANCER_WITH_H3K9ME3_dn	0.412062	0.586494	0.275665	1.03506	3586	88	TOX3, NCAPG2, KIF20B, TBC1D31, HOXA13, POLE2, HAT1, UTP20, GFPT1, RAB25, TMEM237, KIF15, CEP350, NCF2, AAGAB, TUBB4B, NUSAP1, USP39, CDCA2, SQSTM1, DGKH, MMS22L, ZIC2, PTH2, RALGAPB, ANKRD36, NUP210L, VTN, ZNF185, ZNF563, PTPDC1, ENAM	Up-regulated
ACEVEDO_LIVER_TUMOR_VS_NORMAL_ADJACENT_TISSUE_dn	0.777502	0.8714	0.210929	0.875553	7512	257	MLXIPL, SLC7A5, FRG1, LYRM1, DGAT2, MAGT1, HOOK1, AGMAT, RAB33B, TBPL1, SETDB2, EIF2S1, CD68, EZR, PLXNB1, FBP1, ETS2, CCND1, PCMT1, MYCBP2, SARAF, ERLIN1, TMEM30B, SYMPK, VKORC1, ZNF593, ABCB7, HGFAC, AZGP1, PPIG, LY6E, GLUD1, ATP6V1B2, HSBP1, HMGCL, RCN1, TNFRSF21, INTS6, PMPCA, EPHA2, CCAR1, LIPG, PDSS2, AKR7A3, CERS4, GSDMB, NOP14, CYP3A5, NUCKS1, TMEM86B, HAMP, DENND4C, DCUN1D3, KIAA2013, AS…	Up-regulated
ACEVEDO_NORMAL_TISSUE_ADJACENT_TO_LIVER_TUMOR_up	0.000107515	0.00109167	0.482517	1.93853	0	166	FRG1, GPX2, CYP51A1, ALG5, PERP, PTGES3, PON2, MET, F11R, RPL7, HDAC2, UBE2V2, RPLP1, DDX27, RPL14, SORT1, RMDN1, FAM200A, RAB33B, MRPL51, TBPL1, UQCRH, ZNF721, HNRNPA2B1, SLPI, SBDS, HNRNPH3, IMPA1, IGBP1, LMAN2, GTF3C6, GORASP1, RPN2, RPL7A, SYAP1, CISD1, DYNLRB1, SESN2, MYCBP2, PTMA, SACM1L, NADK2, YAP1, PGAM4, PCMTD1, PCTP, ZPR1, CCAR1, LIPG, RPL27A, SUMO2, RPL23, AHCTF1, ARMC1, DPP4, ATG16L1…	Up-regulated
ACEVEDO_NORMAL_TISSUE_ADJACENT_TO_LIVER_TUMOR_dn	0.000101698	0.00109167	0.389146	1.64054	0	335	TMEM97, SCD, CERS6, SLC7A5, SERBP1, SAP18, HPS6, GOT2, NDFIP2, DGAT2, SDC4, MRPL22, NSDHL, TGDS, CYB5B, SLC25A22, POLR2F, EIF2AK1, GTF3A, ROMO1, BPHL, NUDT5, MRPS31, UPB1, DGAT1, ZFAND2A, MAGOH, SEC11A, PSMB4, AGMAT, ZNHIT1, VPS28, ZCCHC14, APH1A, OAZ1, PSMF1, DNAJA1, NUP62, RPS25, RPL12, PLEK2, AHCY, MEPCE, SNRPF, KPNA1, SDHB, PNP, PSMB7, FGGY, HMGCR, PRDX5, COX5B, PSMA3, STARD10, KCTD5, POLE3, …	Up-regulated
ACOSTA_PROLIFERATION_INDEPENDENT_MYC_TARGETS_up	0.000116863	0.00109167	0.60852	2.25207	0	80	CSE1L, SKP2, PSMG1, NOLC1, SORD, SLC39A4, LYPLA1, SLC5A3, DDX28, SLC29A1, PWP1, DHCR7, URI1, EIF3J, UCK2, SPG21, PARP1, NUP210, SLC39A6, GNPDA1, ODC1, SLC19A2, CUTC, GCSH, RRP1B, TSPO, NUP214, HILPDA, GLS, CD320, DUSP9, XPO6, WDR74, NQO1, AATF, BLMH, CTPS1, EIF4A3, FBXO41, PEX5	Up-regulated
ACOSTA_PROLIFERATION_INDEPENDENT_MYC_TARGETS_dn	0.914784	0.953738	0.191857	0.74256	8179	114	KRT18, MYC, NEU1, GABRE, SHANK2, S100A11, KRT8, SH3BP1, LYPLA2, HEY1, CMTM6, CREM, MINPP1, ADGRG1, CAP1, ACSM3, STAT5A, SERPINH1, NAGA, ARHGEF5, ARFGAP3, PEX6, CAPN1, CTSD, RIT1, POLD4, KLF6, RAC2	Up-regulated
ADDYA_ERYTHROID_DIFFERENTIATION_BY_HEMIN_up	0.767357	0.864027	0.227465	0.830636	6487	73	APOC1, INSIG1, BIRC5, MYB, DHX9, ETV5, TAX1BP1, CTSH, CXCL8, HSPA1B, CREM, CPOX, JUN, ADAM10, OSGIN1, CEBPB, NQO1, HSPA5, GTF2I, FTH1, PTP4A3, NPL, MAFG, TXNRD1	Up-regulated
AFFAR_YY1_TARGETS_up	0.301095	0.473988	-0.196771	-1.05008	164	191	GRIA3, EFEMP1, CFH, ID4, MS4A1, KLRB1, WNT16, EPHA7, MMP2, BMP6, ABCA3, TPH1, ANKRD1, PLTP, ELOVL2, FOS, FAS, SIN3A, CLU, NTF3, ITGB6, EBF2, TGFB2, CEND1, MYOM1, TNNC1, TBX2, RPGRIP1, TP53INP1, PAFAH2, SLC2A4, ACKR3	Down-regulated
AFFAR_YY1_TARGETS_dn	0.00010352	0.00109167	0.437448	1.81505	0	255	PLK1, SCD, DIAPH3, MKI67, CYP51A1, DNAJC2, CDC6, BUB1, AURKA, CCNA2, RAD51AP1, TTK, HMGB1, TRIP13, MRPL52, TOP2A, APOC1, SNX5, KIF23, NSDHL, DUT, RFC4, POLA1, TERF1, SUV39H2, PLK4, SLC29A1, CCNB1, CCNB2, CENPF, MTHFD2, RAD18, PRC1, STMN1, GJB3, KIF20A, CDC25C, BIRC5, NCAPG, MSMO1, STARD4, MTCH2, SHCBP1, SPP1, ANKH, PTPRO, TFAP4, IDI1, KIF11, HMGB2, CENPH, EXO1, MCM3, LIG3, LGR5, TACC3, HSPB7, KIF…	Up-regulated
AGUIRRE_PANCREATIC_CANCER_COPY_NUMBER_up	0.000102764	0.00109167	0.422368	1.76308	0	282	PON2, PSMA7, RNF6, PVT1, PRELID3B, RPS21, SLC39A4, SLC25A13, MYC, MRPL13, SYPL1, CDKN2A, SNRPD2, PMS2P1, PTK2, YTHDF1, RNF139, GID8, ACLY, RABGEF1, UTP18, TAF2, TBC1D31, LMTK2, RPL18, DGAT1, FIS1, ZNHIT1, BET1, VPS28, RPL27, OSBPL2, PHB, CYC1, DDHD2, DLGAP5, GIPR, NUP62, NME1, RPS9, NDUFS6, TMEM248, NBR1, COX11, WDR3, ASNS, NPEPPS, CBLL1, NPC1, ASH2L, ARPC1A, DPF1, ZNF623, CDC27, MTMR6, TCFL5, HN…	Up-regulated
AGUIRRE_PANCREATIC_CANCER_COPY_NUMBER_dn	0.000104232	0.00109167	0.414789	1.70949	0	225	CCT2, POLR2F, MAK16, PPIL6, AMD1, HDAC2, HBS1L, ERLIN2, SLC11A2, STMN1, CCDC59, CDC40, KDM1A, PRKAG1, COPZ1, ATP6V0C, SH3BP1, LSM3, YEATS4, FOCAD, PUM3, TTI2, C12orf29, SRRM1, SMAGP, ATF4, YTHDF2, DCTD, PPP5C, LYPLA2, MPST, SNX3, TXNL4A, ATG5, SMPD2, QRSL1, KLHL9, SARAF, CDKN2AIP, SNAPC3, DCTN6, RPS6, MMP11, VLDLR, ZNF593, HPS4, HNRNPA1, HAUS6, HEBP2, RSRP1, PRMT2, HECA, AK2, SMARCB1, ATP6V1B2, Y…	Up-regulated
AIGNER_ZEB1_TARGETS_up	0.00117386	0.00611232	0.550458	1.75523	8	34	OCLN, F11R, MAL2, CDH1, GJB3, CDH3, MARVELD2, EPCAM, EPPK1, TMEM30B, TACSTD2, TSPAN15, DMKN, CRB3, CD24, SFN, DSP	Up-regulated
AIYAR_COBRA1_TARGETS_up	0.260199	0.428426	0.35161	1.15281	2040	39	CLDN1, FBXL6, MBTPS1, ASS1, ASNS, IFITM1, PARP4, TRIB3, TOMM20, ENAH, AREG, CTSB, NEK2, FHL2, MAPK8IP2, DEGS1, TMEM50A	Up-regulated
AIYAR_COBRA1_TARGETS_dn	0.0770981	0.176383	0.450659	1.38927	575	29	GOT2, PRDX3, SRSF2, CPD, CLDN4, HELLS, EPHB3, MYO5C, HPRT1, AAGAB, HNRNPAB, DCTN2, PSMD12, HSPB1, SOX4, APIP, FGFR3	Up-regulated
AKL_HTLV1_INFECTION_up	0.633547	0.76768	0.295701	0.883478	4641	25	ACLY, NME1, S100A10, FABP5, CTNNA1, CBX1, IDH2	Up-regulated
AKL_HTLV1_INFECTION_dn	0.742792	0.848826	0.233748	0.841013	6208	66	DNAJC15, CCNC, CDH1, RPIA, IL17RB, TCTN3, CTSA, DNAJB6, JUN, SERP1, CDK19	Up-regulated
ALCALA_APOPTOSIS_up	0.000116171	0.00109167	0.520714	1.93951	0	84	DENND1A, AURKA, SCCPDH, VDAC1, CCT5, CEBPZ, RPL10A, XPO1, SLC25A3, DDHD2, MTCH2, MFF, MTCH1, TALDO1, HSPA8, MARK2, ANXA7, METAP1, ATP1A1, RPLP0, SYMPK, CASP1, IL32, SDHC, MSH2, CD7, TOMM20, UBXN4, TIMM17A, EIF3F, FUS, EEF1A1, APH1B, GAPDH, QPRT, NUP205, GPI, SCAMP3, HCCS, BAX, SLC25A6, AAAS, RIT1, ELOVL1, AP5Z1, RAC2, MATK, MX1, GZMB	Up-regulated
ALCALAY_AML_BY_NPM1_LOCALIZATION_up	0.20284	0.359658	-0.219228	-1.10625	199	125	CPA3, IGHA1, F13A1, ADAMDEC1, CFH, PIEZO2, MMP2, ARHGAP25, AGXT, SGPL1, PTX3, DEFB1, HOXB3, ZCCHC2, EPB41L3, HOXA7, ECHDC2, CLU, SNCAIP, SPATA6, PBX3, SMPDL3A, FZD7	Down-regulated
ALCALAY_AML_BY_NPM1_LOCALIZATION_dn	0.00148968	0.00735729	0.376991	1.52541	13	181	TFDP1, TPX2, PTTG1, CDKN3, MKI67, CDC6, CCNA2, UBE2C, PIP5K1B, MTHFD1, KIF23, DUT, CKS1B, CENPM, MCM10, CCNB1, CCNB2, DHFR, CHEK1, CCNF, POLE2, CDC25C, BIRC5, ALDH4A1, RANBP1, DLGAP5, SHCBP1, C20orf27, NUP210, DTYMK, ATF6B, EXO1, ITGA9, KIF2C, IFITM1, PXMP2, XPA, CDC20, CORO2A	Up-regulated
ALFANO_MYC_TARGETS_up	0.000312565	0.00220665	0.380577	1.57109	2	231	CSE1L, PSMG1, MYCBP, DDX21, PES1, SDC4, MYC, RSL1D1, NOP56, ARL6IP1, PYCR1, ITGA6, PLK4, TARBP1, PPAT, E2F5, STMN1, DHCR7, RER1, UCK2, PAICS, EBNA1BP2, PPIF, TCF19, SLPI, TUFM, SYNGR2, AKAP1, LARP1, TFAP4, SMPD4, DNAJC11, AK4, MMADHC, PNP, MYBL2, SNU13, SLC39A6, CPNE3, GNPDA1, TOMM40, MME, PAFAH1B3, RSL24D1, S100A10, SLC16A1, STC1, UBE2K, HMGB3, ANXA7, METAP1, SDCBP, TTLL12, DDB2, HS3ST1, IMP4, D…	Up-regulated
ALONSO_METASTASIS_up	0.000106406	0.00109167	0.508801	2.05875	0	181	ANLN, SCD, GLO1, ADK, VDAC1, GGH, CCT5, LAMTOR5, NDUFB11, CKS1B, BCCIP, SLC30A6, IFRD1, ATP6V0B, RPL10A, DSG2, EIF3H, RAN, PCID2, NDUFAB1, MAPRE1, TUBA4A, MYB, VBP1, PAICS, ANO6, APEX1, ATRAID, SMIM12, SLC25A33, CYC1, CBFB, DUSP12, TMEM248, ENC1, SET, AK4, XRCC5, MMADHC, ASH2L, COX8A, KIF11, MDH1, CHCHD2, WEE1, SRI, SPCS1, RPS10, TMCO1, EIF5, MRPL37, PRDX5, HSPA8, S100A10, STK24, MRPS22, TMEM258,…	Up-regulated
ALONSO_METASTASIS_dn	0.0938318	0.204212	-0.381281	-1.35269	250	24	AKAP13, FOXO1, ACKR2, RGPD1, CYP7B1, NTF4, PCDH9, BCL2L10, CDH10	Down-regulated
ALONSO_METASTASIS_EMT_up	0.431981	0.601273	0.321515	1.02521	3311	34	ANLN, DSG2, RAN, TUBA4A, ENC1, SDCBP, PFN1, CTSB, RAB1A, TUBA3C, TUBB3, SPA17, TUBA1A, FGG	Up-regulated
ALONSO_METASTASIS_NEURAL_up	0.0325342	0.0895665	-0.494068	-1.58296	94	17	PTPRZ1, PDGFRA, KIT, PMP22, EMP1, AKT1S1, CHN1, L1CAM, MAGEA6	Down-regulated
ALTEMEIER_RESPONSE_TO_LPS_WITH_MECHANICAL_VENTILATION_up	0.0338983	0.0926017	-0.256884	-1.29289	33	121	RCAN1, F13A1, GEM, TNFAIP2, MT1X, IL6, OSMR, F3, AKAP12, LILRB5, CH25H, CCR2, THBS1, CYBB, CD14, SLFN12, ST3GAL1, ADAMTS4, GPR65, GCH1, MS4A6A, MT1A, MAFF, IL1R2, CEBPD	Down-regulated
AMBROSINI_FLAVOPIRIDOL_TREATMENT_TP53_up	0.485665	0.650615	-0.203137	-0.994024	558	104	MED12, FCMR, ATP2A3, TRPC1, PEG10, ANG, NR3C1, ACACB, SLIT2, CPT1A, COL15A1, SEMA3B, CCDC85C, VAMP2, CC2D1A, KIAA0513	Down-regulated
AMIT_DELAYED_EARLY_GENES_up	0.205031	0.362287	-0.370525	-1.21095	594	18	ZFP36, FOSL2, ID1, MAFF, ZFP36L1, BTG2, NAB2	Down-regulated
AMIT_EGF_RESPONSE_120_HELA_up	0.26941	0.438816	0.315283	1.13437	2251	66	MVD, EPHB4, CEP104, HNRNPH1, CDC27, JUP, BCL10, ARPC4, CXCL8, PUS3, UBXN4, TBL3, ZPR1, EPHA2, LAT2, AREG, PLAUR, NAP1L1, NDEL1, CXCL1, FOSL1, IL27RA, MATK, OGFR, DUSP4, HBEGF, TNFRSF10B, DAXX, IRS2, ZNF747, CXCL2, CDC42EP2	Up-regulated
AMIT_EGF_RESPONSE_120_MCF10A_up	0.00382166	0.0157344	0.510041	1.67979	29	40	SPRY4, APOO, PCBD1, ENC1, BCL10, CCL20, LSM4, EPHA2, TRIM21, IL1B, MRGBP, PLAUR, NAP1L1, CDV3, EREG, NSUN3, EIF1, RPS6KA4, TXNRD1, FOSL1, YRDC, BAX, ING2, HBEGF	Up-regulated
AMIT_EGF_RESPONSE_240_HELA_up	0.346678	0.521759	0.308055	1.0807	2848	57	SDC4, DNMBP, GJB3, YKT6, TOP1, SOX13, TM4SF1, EZR, THOC1, ARPC4, CREM, MAT2A, LRP8	Up-regulated
AMIT_EGF_RESPONSE_240_MCF10A_up	0.851606	0.918664	0.250381	0.722579	6151	21	INSIG1, B3GNT2, PTAFR, GPN2, DUSP4, TNFRSF12A, STK17A, SLC7A11, PLAU	Up-regulated
AMIT_EGF_RESPONSE_40_HELA_up	0.0510156	0.129167	-0.341338	-1.39168	107	42	PALMD, SGK1, ZFP36, IL6, EGR1, ID1, IER2, NFIB, CBX4, NR4A1, MBNL1, IER3, DUSP1, SEC23A, BTG2, DUSP2	Down-regulated
AMIT_EGF_RESPONSE_40_MCF10A_up	0.23273	0.394861	0.444813	1.20061	1633	16	BUB1, NDUFB6, TIMM44, HSDL2, UNC93B1, JUN, TUFT1, GNS, KLF6, DUSP5, MIS18BP1	Up-regulated
AMIT_EGF_RESPONSE_480_HELA_up	0.322813	0.49457	0.269739	1.07995	2996	159	POM121, ITGA6, GLRX3, TNS4, ITGA2, DGAT1, PPIF, PPIAP21, ENC1, SNRPF, TM4SF1, HMGA1, NUDT4, CCND1, STC1, P3H2, CTNNB1, SH2D2A, DIAPH1, LY6E, HEBP2, TACSTD2, TNFRSF21, GPRC5A, SLC19A1, LAMP1, PHLDA2, TSPAN14, MTAP, TUBB4B, PLAUR, CEP85, SLC1A5, PHC2, EGFR, SERPINH1, CDV3, HMGXB3, INPP1, DUSP7, ARHGDIA, PPDPF, SFN, TRAF4, PNO1, HPCAL1, RRP12, DPAGT1, XAB2, RRBP1, PLEC, BRD2, PMEPA1, RRP1, EFHD2, RA…	Up-regulated
AMIT_EGF_RESPONSE_480_MCF10A_up	0.0660748	0.157098	0.415365	1.37613	520	42	ITGA2, CABIN1, PLEK2, GPR153, ODC1, GFPT1, STC1, TIMM10, RHOF, SH2D2A, RAB22A, TRIB3, PHLDA2, RFC1, SOX9, HPCAL1, SRRD, MAPK1, PMAIP1, CYP27B1, APIP	Up-regulated
AMIT_EGF_RESPONSE_60_HELA_up	0.172033	0.319172	-0.288687	-1.1842	357	44	SLC20A1, TNFAIP2, FOSL2, SNAI2, CITED2, LIF, RHOB, FOSB, NR4A3, NR4A2, UGCG, ZFP36L1, RUNX3	Down-regulated
AMIT_EGF_RESPONSE_60_MCF10A_up	0.123016	0.249446	-0.31743	-1.26199	278	37	IL6, EGR1, ID1, IER2, PLK2, ITGB6, DLC1, TP63, CALD1, IER3, GLIPR1, MAGED2, DAPP1, PTGER4, GADD45A, TPM1	Down-regulated
AMIT_SERUM_RESPONSE_120_MCF10A_up	0.859927	0.925688	-0.182502	-0.815061	1411	64	PDZD2, LIF, ID2, ID1, MCL1, FERMT2, DLX2, ID3, BMP2, KRT10, MAFF, SPHK1, STX12, BCAR3, ESRP2, RAP2B, KLF4, DAPP1, ATP8B1, SKIL, GADD45A, SERTAD3, CDR2L, SIK1, CLCF1	Down-regulated
AMIT_SERUM_RESPONSE_20_MCF10A_up	0.163082	0.30652	0.474821	1.28161	1144	16	SLC5A3, IL22RA1, JUN, UBBP1, ITGB1BP1, WDR74, DGKH, SLC39A9	Up-regulated
AMIT_SERUM_RESPONSE_240_MCF10A_up	0.0596189	0.145253	0.397578	1.38115	484	54	CLDN1, MRPL33, CDH1, ITGA2, B3GNT2, TIMM44, TM4SF1, EZR, PRKAG2, PRSS8	Up-regulated
AMIT_SERUM_RESPONSE_40_MCF10A_up	0.114178	0.235361	-0.338856	-1.2932	272	32	ZFP36, CITED2, EGR1, MCL1, FOSB, FOS, CLIC4, NR4A2, TP63, DCN, NR4A1, DUSP1, ADM, SLC16A4	Down-regulated
AMIT_SERUM_RESPONSE_480_MCF10A_up	0.553013	0.707944	0.291544	0.945032	4276	37	MCM10, S100P, SLC25A32, CYB5R1, TIMM23, ACTN4, MRGBP, PARG, ZBTB24, GMEB2, CDV3, SPRR1A, SIGMAR1, CD24P4, OR7E12P, FOSL1, NSMF, APIP, SPRR2A, MALL, SPRR1B	Up-regulated
AMIT_SERUM_RESPONSE_60_MCF10A_up	0.232429	0.394641	-0.259689	-1.12964	419	56	RCAN1, SGK1, VGLL3, EGR1, RHOB, CYBRD1, IER2, GAS1, PNRC1, SLC35D1, PLK2, TNC, ITSN1	Down-regulated
AMUNDSON_RESPONSE_TO_ARSENITE_up	0.00168191	0.00803133	0.364678	1.49278	15	209	ANLN, SLC7A5, EIF2S2, HSPE1, RAD51AP1, TRIP13, GTF3C3, HSPA9, EIF4EBP1, NEU1, TUBGCP3, AHSA1, HIBCH, ADNP, UBE2B, NPM1, RPL27, TMF1, OGT, DNAJA1, TAP1, AKAP1, CDK6, ZMYND8, ASNS, RPUSD2, ATP2C1, HSPA4, CIT, RNF115, ATP6V1C1, UBE2H, HSPA13, ETS2, HPS5, ATP6V0E1, MED14, CTSA, SOD1, DNAJB6, MR1, CCT8, CHERP, INTS6, MT3, SH2D3C, DNTTIP2, CLK1, TIMM17A, N4BP2L2, UBXN8, RALGDS, ZFAND5, PFDN5, CEBPB, PA…	Up-regulated
ANASTASSIOU_MULTICANCER_INVASIVENESS_SIGNATURE_up	0.000601323	0.00359466	-0.47346	-2.10391	0	63	SERPINF1, FBN1, GREM1, GLT8D2, ACTA2, NID2, MMP2, CTSK, COPZ2, SNAI2, AEBP1, C1QTNF3, MFAP5, LGALS1, COL6A2, LOX, COL5A1, PRRX1, SPARC, ITGBL1, OLFML2B, PCOLCE, DCN, COL1A2, TIMP3, MXRA5, RCN3, EDNRA, COL1A1	Down-regulated
ANDERSEN_CHOLANGIOCARCINOMA_CLASS1_up	0.822029	0.897485	0.221729	0.785261	6798	60	MPP6, MCCC2, KRT23, SPP1, UBD, CSPP1, SMYD2, ATP1A1, CXCL6, ZDHHC1	Up-regulated
ANDERSEN_CHOLANGIOCARCINOMA_CLASS2_up	0.000106758	0.00109167	0.473072	1.90935	0	175	TPX2, ANLN, PLBD1, FERMT1, BUB1, AURKA, TTK, UBE2C, CEP55, KLF5, SLC39A4, TOP2A, FAM83D, C1GALT1, ANKRD22, SPIRE2, CCNB2, MMP12, GJB3, CDH3, ITGA2, S100P, MYB, ANXA3, PPP1R1B, DLGAP5, NMU, PLEK2, SLC6A20, KIF11, CYP2S1, NFE2L3, CDCP1, CDH17, AUNIP, UNC93B1, BORA, CLDN4, CDX2, NOXO1, BCO1, GPR160, HSPA1B, TRIM31, CEACAM6, CDC20, CORO2A, KRT15, KIF15, MUC17, GPR35, GPRC5A, KRT19, COL11A1, AP1S3, CE…	Up-regulated
ANDERSEN_LIVER_CANCER_KRT19_up	0.000130429	0.00109167	0.679106	2.16545	0	34	ZSWIM1, CCT2, CBX3, RPL10A, RPIA, MMP12, RPS18, APEX1, EPCAM, RPS25, RPS14, RPS17, TES, NOP58, RPL35A, NCF2, RPL27A, RPL13A, RPL9, YWHAQ, RPS12, IP6K2, NAP1L1, RPS3A	Up-regulated
ANDERSEN_LIVER_CANCER_KRT19_dn	0.0835509	0.18642	-0.268852	-1.24284	127	74	UGT2B17, PAPSS2, UGT2B15, CPQ, BAAT, RETSAT, ANG, GPT, SERPINA3, CPT2	Down-regulated
APPEL_IMATINIB_RESPONSE_up	0.166295	0.311288	0.395068	1.25235	1268	33	APOC1, NEU1, PPARG, CD68, CTSH, HEXB, CTSA, LAMP2, GUSB, LAMP1, GM2A, CTSB, GNS, CTSD, OSBPL3	Up-regulated
APPIERTO_RESPONSE_TO_FENRETINIDE_up	0.0607706	0.147302	0.434031	1.4069	469	37	PSMA7, TFRC, SDC4, AHSA1, UBQLN1, HSPA4, TM4SF1, CYB5R1, HSPA8, CCNJL, STXBP3, ZNF672, MMP3, FOXJ3, KRT6B, CCNL2, RRP12, UCHL1, AKAP9, BRD2	Up-regulated
APPIERTO_RESPONSE_TO_FENRETINIDE_dn	0.00012566	0.00109167	0.627679	2.11612	0	46	MDH2, UGGT2, CYB5B, IARS2, DHFR, PPP1CC, NDUFA2, SET, ASNS, MDH1, PSAT1, PTCD3, BANF1, PPIH, PTMA, IFITM3, ARFGEF2, SLC3A1, C11orf49, EIF3F, UQCR10, EGFR, TRIM28, ISCU, SIGMAR1, LDHA	Up-regulated
APRELIKOVA_BRCA1_TARGETS_up	0.190254	0.343831	0.362775	1.21269	1506	44	STAM, GOT2, DDX21, TFAP2C, KRT8, ANXA3, DNAJA1, DDX1, PSMC2, EIF2S1, HSP90AA1, RPA2, ARF1, PSMC1, SFN, PDIA3, WNT3, SPTAN1, RIT1, TUBA1A, ROCK2	Up-regulated
ASGHARZADEH_NEUROBLASTOMA_POOR_SURVIVAL_dn	0.897884	0.944565	0.214424	0.703025	7042	39	FUBP1, DDHD2, PGM2L1, ZNF91, CHD3, PLPPR3	Up-regulated
ASTIER_INTEGRIN_SIGNALING_up	0.269895	0.439296	0.323217	1.13389	2217	57	GJB3, CCT4, LGALS8, EIF2S1, RRAGD, NUP88, ITGAE, GDPD5, CMC4, DPF2, TOR1A, N4BP2L2, GATA2, PSMC1, MDN1, ETV4, STARD3, ACSL3, NUP205, SBF1, COPS5, U2AF2, CHRNB4, LIMK2	Up-regulated
ASTON_MAJOR_DEPRESSIVE_DISORDER_up	0.7047	0.822031	0.254119	0.856724	5607	46	BCL11A, MTHFD2, OSBPL2, RAB2A, OSER1, ZNF529, JUN, CMC4, GSTM1, ACD, CEP250, IGFBP7	Up-regulated
ASTON_MAJOR_DEPRESSIVE_DISORDER_dn	0.59296	0.739533	0.237458	0.948438	5491	154	CDK8, STIP1, TMEM63A, RALA, SNRPE, AMD1, UBE2A, ERBB3, PIK3R1, PSMD11, ZKSCAN1, PLAGL2, SYNGR2, NPC1, SRSF10, NPIPB3, KIF2A, SLC4A2, NUP88, ADIPOR2, SYNJ2, WWP1, MCM7, LAMP2, LIPE, LRP8, VAMP3, SOX10, ACSM3, RNF19B, P2RX7, MAPK8, TAF11, COPA, SEMA3C	Up-regulated
AUNG_GASTRIC_CANCER_up	0.000124332	0.00109167	0.557017	1.90449	0	49	RPL8, IFRD1, PRKAG1, BIRC5, MED1, MAPK13, MYBL2, HOXA10, CCT3, ZWILCH, ETS2, STAT2, JUN, AQR, KMT2D, SH3BGRL2, TPT1, NOP14, RCC2, ALDH7A1, GOLPH3L, FXYD3, MIA, NEK9, KIF4A, ATE1, TMLHE	Up-regulated
AZARE_NEOPLASTIC_TRANSFORMATION_BY_STAT3_up	0.162512	0.305699	-0.224183	-1.13154	162	124	SFRP1, CFH, IL13RA2, EMP3, GREM1, CA12, ARHGAP25, MCL1, ARHGDIB, PLTP, GNG11, FST, S100A9, PLK2, THBS1, TNC, IFI16, FEZ1, ITGB6, FGFBP1, COL5A1, CLIC4, SCG5, HRH1	Down-regulated
AZARE_NEOPLASTIC_TRANSFORMATION_BY_STAT3_dn	0.0931507	0.203017	-0.435356	-1.39485	271	17	CPE, PEG10, PTGS1, PLAC8, CDA, FOXG1, ADIRF	Down-regulated
AZARE_STAT3_TARGETS_up	0.504673	0.668492	-0.27243	-0.966514	1349	24	MCL1, S100A9, THBS1, TNC, ITGB6, CLIC4, PCDH7, TP63	Down-regulated
BACOLOD_RESISTANCE_TO_ALKYLATING_AGENTS_up	0.00149533	0.00737727	-0.53852	-1.91054	3	24	ACKR1, CA2, MT2A, MT1X, IGF1, HTRA1, ID2, MT1A, PRSS12, SHOX2	Down-regulated
BACOLOD_RESISTANCE_TO_ALKYLATING_AGENTS_dn	0.0251588	0.0724693	0.438119	1.49093	201	48	CCT5, LRPPRC, SRSF2, OGT, TCEA1, TUBGCP4, UBXN7, SRSF1, KDELR2, MEGF9, TLN2, TBR1, CS, TUBB, ZNF124, COA1, CCNG1, LIG4, TRIM28, KHSRP, VEZF1	Up-regulated
BAE_BRCA1_TARGETS_up	0.0573035	0.141128	0.380145	1.36774	478	66	NDUFA4, RNF6, IFRD1, HACD3, MSMO1, TCEA1, ATF4, IDI1, CAMLG, JUP, TAX1BP1, GNG10, TRAM1, LAMP2, HINT1, GTF2A2, KRT19, DRAP1, PDAP1, NEK4, PRDX2, GMFB, LGALS3	Up-regulated
BAE_BRCA1_TARGETS_dn	0.00146277	0.00726334	0.587586	1.8242	10	30	STIL, NONO, HYOU1, MYB, SMAD5, NPM1, PEX2, TKT, PKN2, CAD, GLUD1, TJP2, MAN1A2, TCOF1	Up-regulated
BAELDE_DIABETIC_NEPHROPATHY_up	0.0609098	0.147562	-0.265537	-1.26333	78	88	PTGIS, SLCO2A1, CAPN3, MT2A, MT1G, GAS2L1, STARD8, ID1, PTPRM, PLPP3, ITM2A, HBB, HLA-DRB1, AANAT, TLE2, CLU, GPLD1, HYAL1, ZCCHC24, TEK, EML1, UNC5B, PECAM1, ARHGEF15, HPN, UGT2B7	Down-regulated
BAELDE_DIABETIC_NEPHROPATHY_dn	0.158086	0.301273	0.266019	1.13232	1565	421	CERS6, FNBP1L, TOMM34, HSPB11, CYP51A1, SMARCC1, PMS2P3, PSMA2, TIAL1, SDC4, EIF4A2, YWHAZ, TBCA, MTHFD2, CD47, XPO1, AKAP11, SEC61G, LETMD1, PAK1, EIF3M, SUB1, TMEM123, PARP1, DNAJA1, RAB21, TAP1, PARD3, PTPRO, SET, LSR, XRCC5, SPOCK2, CLEC16A, DCTD, PAWR, PSMA6, ODC1, CANX, HSP90AA1, RPN2, MME, AASDHPPT, IFITM1, SULT1A2, PSMA3, PLXNB2, UBE2L6, TAX1BP1, DNM1L, PCMT1, CTDSPL, KLHL9, SARAF, PLA2R1…	Up-regulated
BAKER_HEMATOPOIESIS_STAT3_TARGETS_up	0.0523605	0.131847	0.555915	1.47688	365	15	CCNA2, MYC, MMP9, BIRC5, CCND1	Up-regulated
BAKKER_FOXO3_TARGETS_up	0.0115789	0.03851	-0.356102	-1.53543	21	53	CR2, GRIA3, KIT, CITED2, P2RY14, SLC12A6, GNAI2, CPT1A, ARG1, DNAJC12, TCP11L2, TP53INP1, ATP7A, CCPG1, DCN, HSCB	Down-regulated
BAKKER_FOXO3_TARGETS_dn	0.0111864	0.0373665	0.350843	1.40863	103	165	MKI67, WDR4, ALKBH7, TRIM27, CDK2, BCL11A, SMC3, FAM136A, COPS7A, POLB, SRSF2, ACAD10, SNRPA, PRKAG1, CETN2, NELFA, FOCAD, SLPI, COX8A, AGPAT5, PSMA1, TBP, ETV5, CYP2J2, TULP3, UTP6, POLE3, YIPF6, TIMM10, GFER, GK, CAPN15, SCRIB, DDX18, SEC61B, TACSTD2, ADGRG1, SLC19A1, SLC9A8, TUBB, N4BP2L2, WDR74	Up-regulated
BALDWIN_PRKCI_TARGETS_up	0.101964	0.216785	0.414522	1.32904	783	35	TSPAN6, SLC11A2, EIF1AX, PAK2, IFITM1, TFDP2, HFE, TGOLN2, GPRC5A, OXTR, SLK, ZBTB20, GMFB, SLC35A5, ATP6V1G1, EIF4EBP2, MAZ, NEK9	Up-regulated
BANDRES_RESPONSE_TO_CARMUSTIN_MGMT_24HR_dn	0.511204	0.674813	0.306933	0.97297	3900	33	MED1, MDK, ICAM5, SLC30A3, PFN1, DHX16, ARTN, TSPAN4	Up-regulated
BANDRES_RESPONSE_TO_CARMUSTIN_MGMT_48HR_up	0.631226	0.766009	0.312216	0.880414	4511	19	SNRPB2, SMPD2, SNAPC3, TUBB, SMARCD1, GOLGA4, CTNNAL1	Up-regulated
BANDRES_RESPONSE_TO_CARMUSTIN_MGMT_48HR_dn	0.274709	0.445241	0.277076	1.10782	2545	156	CDK8, EZH2, STAM, EIF6, MVD, B4GALT5, INSIG1, PPM1G, SFPQ, PCBD1, ATP6V0C, MDK, VGF, CD68, FKBP1A, BAIAP2, CHRM4, AMH, ADAM15, RAD23A, SLC30A3, DNASE1L2, YWHAH, PFN1, CA6, DHX16, DVL1, CEBPB, ARTN, SRP14, FOXJ1, HNF1A, PFKM, PAX8, PTPN3, CD151, TMBIM6, FTH1, PFKFB2, GHSR, LAD1, CDX4, MAP4K2, PCYT1A, SHMT2, TAC1	Up-regulated
BANDRES_RESPONSE_TO_CARMUSTIN_WITHOUT_MGMT_48HR_up	0.110138	0.229086	0.495734	1.36165	779	17	SNRPB2, GDI2, BCL10, ST6GAL1, SMPD2, SNAPC3	Up-regulated
BANDRES_RESPONSE_TO_CARMUSTIN_WITHOUT_MGMT_48HR_dn	0.568197	0.719904	0.301806	0.930396	4244	29	INSIG1, PPM1G, MDK, AMH, YWHAH, PFN1, LRCH4	Up-regulated
BARIS_THYROID_CANCER_up	0.00163778	0.00789392	0.614868	1.82181	11	24	EIF2S2, CD46, STIP1, COX7A2, CRNKL1, CYC1, ATF4, CYCS, RPN1, ERCC5, COPB1, ACTN2, LPGAT1	Up-regulated
BARIS_THYROID_CANCER_dn	0.00882353	0.0311702	0.452184	1.57626	71	55	USP1, UBE2C, KLF5, LMO7, CDH3, HDGF, ATF1, ANXA4, SNRPF, UBA1, CCND1, RB1, KLHL9, CTNNA1, FNTA, RPL13A, TJP2, RAD50, IRF1	Up-regulated
BARRIER_CANCER_RELAPSE_NORMAL_SAMPLE_up	0.0100725	0.0344456	-0.443193	-1.66447	24	30	CPA3, ADAM28, CHGA, CLIC2, PRKACB, IGF1, ITM2A, FAS, PTGER2, AMPD1, IL1R2, LRRC31, GCG, CREBL2	Down-regulated
BARRIER_CANCER_RELAPSE_NORMAL_SAMPLE_dn	0.425419	0.597889	0.329596	1.0319	3219	31	STK25, ALG13, HSPA1A, NPIPB3, JUN, LAMP1, N4BP2L2, SPTAN1, SPG7, NSMF	Up-regulated
BARRIER_CANCER_RELAPSE_TUMOR_SAMPLE_up	0.0180258	0.0556116	0.604238	1.60526	125	15	CKS1B, ZFAND1, MMP12, ATG12, HSPA13, ATP6V0E1, CXCL8, DNAJB9, ATP6V1G1, MRPL24, PDCD10, LYN, MED21	Up-regulated
BARRIER_COLON_CANCER_RECURRENCE_up	0.187771	0.340816	0.369646	1.21741	1473	40	GPR89B, PWP1, SRP72, POLD3, PSMC2, UGGT1, SNU13, RPN2, THOC2, YIPF6, METTL9, SLCO4A1, ANXA2, TIMM17A, NDEL1, SAR1A, TRIM2, AHI1, XPNPEP1, ARL1, KDELR3	Up-regulated
BARRIER_COLON_CANCER_RECURRENCE_dn	0.0929577	0.202789	0.497391	1.38352	659	18	EPPK1, STAT2, NDFIP1, CTSA, PFKL, FOXJ3, BSG, ASB13, CD24P4, SPPL2B, ARHGAP33	Up-regulated
BASAKI_YBX1_TARGETS_up	0.000102912	0.00109167	0.524379	2.18623	0	277	TPX2, ANLN, PLK1, PTTG1, HJURP, SLC7A5, DIAPH3, CDKN3, RRS1, KPNA2, MKI67, CDC6, BUB1, MELK, AURKA, CDK1, CCNA2, CHORDC1, CACYBP, WDR4, UBE2C, TRIP13, CEP55, SLC39A4, MTHFD1, GART, RFC2, SNX5, DAZAP1, GINS2, KIF23, GLRX2, GINS1, CENPM, CDK2, CENPN, FAM83D, MCM10, SAC3D1, CCNB1, CCNB2, NUDT5, DHFR, CENPW, CHEK1, AHSA1, CSTF3, CBWD1, GTSE1, PRC1, PRELID1, DCUN1D5, TSEN15, KIF20A, MIS18A, NUP93, SLC…	Up-regulated
BASAKI_YBX1_TARGETS_dn	0.320984	0.492661	0.251282	1.06523	3170	371	SCD, CERS6, LSM8, TMC5, STOX1, MET, SRSF7, RSL1D1, CDH1, TSPAN6, MARCKSL1, TM2D3, CRIPT, PIK3R1, SLC25A3, LGALS8, SLC25A36, PDK3, IRF2BP2, NT5DC1, RBM39, DPY19L4, SPP1, PIGP, SLPI, ZNF207, ASS1, ST6GALNAC4, LMBRD2, PAXBP1, ALG13, AK4, DCAF16, DNAJC3, SLC25A27, PNP, RDH10, ATP2C1, P4HA1, TM9SF3, EIF5, RRAGD, CNIH1, ASPH, ETV5, HEY1, IFITM1, KLHDC10, STC1, YIPF6, IDO1, GBP5, MKLN1, BTN3A2, TFDP2, M…	Up-regulated
BASSO_B_LYMPHOCYTE_NETWORK_up	0.000109433	0.00109167	0.582168	2.29918	0	139	TPX2, CSE1L, SLC7A5, SERBP1, HSPE1, CDK1, CCNA2, PSMB2, TRIP13, PES1, ORC5, SSBP1, BUD31, HSPA9, RFC4, PMS2P1, PRDX3, EEF1E1, POLR2F, DBF4, NOP16, CCNB1, AHSA1, PCNA, SSRP1, AIMP2, NDUFAB1, UCK2, PAICS, EBNA1BP2, LSM3, CYC1, NME1, EMG1, POLR2H, SNRPF, ASNS, CYCS, EIF2S1, PSMB5, PSMB7, HDDC2, TOMM40, TCP1, IFITM1, PSMA3, FEN1, CTSH, RUVBL2, UBE2S, SRSF1, DDB2, ZNF593, PSMD14, CTNNA1, TGOLN2, TNFRS…	Up-regulated
BASSO_CD40_SIGNALING_up	0.370995	0.545065	-0.213979	-1.03699	439	98	CR2, FCMR, TNFAIP2, SLAMF1, IRF4, PTPRE, HLA-DRB1, RXRA, LGALS1, KCNN4, NEFM, GPR183, LAPTM5, MEF2C, CD83, PLXNC1, TNFAIP8	Down-regulated
BASSO_CD40_SIGNALING_dn	0.324611	0.496571	-0.234558	-1.06299	520	68	METTL7A, NCF1, PRKAR2B, PNOC, SLC2A5, JCHAIN, ID1, GRAP, ID3, RUNX1T1, LMO3, UBE2J1, ITGB7, CD27, ARL4C	Down-regulated
BASSO_HAIRY_CELL_LEUKEMIA_up	0.000677507	0.00394667	-0.398766	-1.85487	0	77	HPGDS, NOVA1, HBA1, FGFR1, WWTR1, MAF, DST, PTPRM, IL1R1, MFAP5, TBKBP1, HBB, CPVL, THBS1, PLXNC1, DPYD, DAPK1, SMPDL3A, EMP1, ADCY9, SIX3, RNF11, GABARAPL2, FLT3, DLC1, PLOD2, IL1R2, LILRB2, KCTD12, HPN	Down-regulated
BAUS_TFF2_TARGETS_up	0.120033	0.244267	-0.336081	-1.28261	286	32	ZG16, ITLN1, MS4A1, ZEB1	Down-regulated
BECKER_TAMOXIFEN_RESISTANCE_up	0.108844	0.227214	-0.294195	-1.25342	207	51	UGT2B15, TUSC3, CPE, BCAS1, ANG, IFIT1, ID1, BST2, TAGLN	Down-regulated
BECKER_TAMOXIFEN_RESISTANCE_dn	0.397255	0.572321	0.303281	1.04657	3212	52	TTK, TSPAN6, HDAC2, LBR, COX7A2, ORC3, TM4SF1, CCND1, CXCL8, TRIM16, AREG, BCAS2, SEMA3C, ADAM17, CD24P4, PDZK1, SPTSSA, ALDH3B2, TCN1, IRF3	Up-regulated
BEGUM_TARGETS_OF_PAX3_FOXO1_FUSION_up	0.000566893	0.00342598	-0.484259	-2.13351	0	59	SLIT3, ADAMTS1, SGK1, PRKAR2B, ID4, PLSCR4, MDFIC, CFHR1, PEG10, PLN, SLIT2, GNG11, TPBG, PITX2, PLXNC1, DPYD, OMD, CALCRL, KAT6B, PCDH7, STX11, TPK1, ACADL, STK17B, TMEFF1	Down-regulated
BEGUM_TARGETS_OF_PAX3_FOXO1_FUSION_dn	0.829982	0.903547	0.227797	0.767984	6604	46	EPHB2, MYC, TPD52L1, GCNT1, ITGB4, SH3BP4, EPHA2	Up-regulated
BEIER_GLIOMA_STEM_CELL_up	0.648177	0.777981	0.273217	0.885625	5012	37	MPP6, RDH10, RALGAPA2, NT5C3A, SLCO4A1, MYO5C, SIX1, SV2C, RDH13, PROM1, TLE1, RNF19A, PEX13, FGFR3	Up-regulated
BEIER_GLIOMA_STEM_CELL_dn	0.399513	0.574041	-0.229022	-1.02282	655	64	BASP1, GLTP, RNF112, SOS2, LRCH2, HLA-DRB1, CACNA1A, TCEAL7, LAPTM5, BMP2, FUCA1	Down-regulated
BENITEZ_GBM_PROTEASOME_INHIBITION_RESPONSE_up	0.0220653	0.0656115	0.448971	1.50656	174	45	SKP2, DHFR, SGTA, MLF2, ASNS, WEE1, TSTD2, DBF4B, HMGCR, CCND1, SESN2, FBXO7, SUMO2, COMMD2, RBM12, USP22, GPN2, SOX4, SUMO4	Up-regulated
BENNETT_SYSTEMIC_LUPUS_ERYTHEMATOSUS_up	0.101846	0.216634	0.440056	1.34744	755	28	TAP1, IFITM3, LY6E, DEFA1, ISG15, OASL, IRF7, DEFA3, TDRD7, STAT1, CAMP, OAS1, MX1, IFIT3, AGRN, MX2, PLSCR1, IFI44L, SERPING1	Up-regulated
BENPORATH_ES_1_up	0.000101276	0.00109167	0.491156	2.0803	0	366	RAD54B, CSE1L, PTTG1, TFAM, SERBP1, KPNA2, CDCA5, BCL2L12, NDC1, CDC6, GNL3, BUB1, CDK1, CCNA2, RAD51AP1, NOLC1, PARPBP, ABCE1, PRIM2, DDX21, C1QBP, ICE2, MTHFD1, GART, SRSF7, GINS2, LYPLA1, MAL2, RFC4, NOP56, MAK16, MCM10, CEBPZ, AMD1, SPC25, HSPD1, TERF1, NCAPG2, TMPO, DEK, NOP16, SLC29A1, CCNB1, DHFR, POLR3G, MTHFD2, CHEK1, RRP15, DSG2, FUBP1, SPRY4, TRIM24, BRIX1, PUS7, NPM3, SNRPA, MIS18A, P…	Up-regulated
BENPORATH_ES_2_up	0.143694	0.279436	0.383302	1.26238	1127	40	MCM10, ORC2, DTYMK, MYBL2, RRP9, POU5F1, HELLS, DSCC1, VRTN, SLC5A6, ETV4, CYP26A1, ERCC6L, ORC1, NANOG, DBNDD1, NCAPH, TDGF1, CLDN6, GOLGA7, PRKD3, GPR19	Up-regulated
BENPORATH_ES_CORE_NINE_CORRELATED_up	0.000113276	0.00109167	0.523863	1.99718	0	99	TFDP1, EZH2, E2F8, TCF20, RBL1, POLR1E, TRIP13, KLF5, MYC, BCL11A, HDAC2, DEK, MYBBP1A, TAF2, TFAP2C, SSRP1, KDM1A, E2F1, E2F3, NFKBIE, PLAGL2, TBPL1, DR1, TGIF2, CBFB, ATF4, MYBL2, HMGB2, NFE2L3, HMGA1, YBX1, HMGB3, TFDP2, HSF1	Up-regulated
BENPORATH_MYC_TARGETS_WITH_EBOX_up	0.00010445	0.00109167	0.467587	1.92359	0	220	PLK1, BRCA2, DKC1, BCL2L12, TFRC, HSP90AB1, MET, AMD1, HSPD1, CCNB1, NSUN2, LBR, TXN, AKR1A1, SLBP, POLB, DBI, STMN1, E2F1, RPL36A, PAICS, PHB, APEX1, SRM, PARP1, VHL, HNRNPA2B1, NME1, PPID, TOP1, PDHA1, SYNGR2, AKAP1, NCL, ATF4, WEE1, CLNS1A, HSP90AA1, ETS2, HSPA8, RPS15, PSMA3, RPL22, SLC4A2, CCND1, UROD, ENO1, PTMA, RPL23A, RPS6, HNRNPA1, UBA52, JUN, PSMB1, ZNF146, ELK1, ARF1, CDK4, EBP, MCM7,…	Up-regulated
BENPORATH_NOS_TARGETS_up	0.431652	0.601273	0.254585	1.02394	4022	167	RAD54B, PRR11, ATAD2, UFM1, TCF20, KLF5, TOP2A, USP7, POLR3G, DPH6, TRIM24, RPS18, RBM22, WDR36, CDC14B, DUSP12, URM1, RIF1, SET, NFE2L3, TALDO1, JUP, CDC7, BUB3, GNG10, POU5F1, KIAA1143, CAPZA2, TBL1XR1, KIF15, PRPF38A, ICMT, IER5L, SULF1, FRAT2, UBR5, TAF12, PARG, COMMD7	Up-regulated
BENPORATH_OCT4_TARGETS_up	0.148289	0.286797	0.279413	1.1642	1438	273	RAD54B, PRR11, ATAD2, UFM1, TCF20, KLF5, CDC123, TOP2A, SNX5, MRPL13, TRA2A, CDH1, NUDT5, USP7, POLR3G, DPH6, SLC4A1AP, TRIM24, SLIRP, LSG1, RPS18, PAK1, MKRN1, RBM22, WDR36, PBDC1, CDC14B, TBC1D22B, TGIF2, DUSP12, RAD51C, URM1, PARD3, RIF1, SET, EIF2S1, RDH10, HMGB2, NFE2L3, WEE1, TSTD2, TALDO1, JUP, CDC7, PSMA3, BUB3, IST1, GNG10, POU5F1, KIAA1143, CAPZA2, ANKHD1, PRPS1, TBL1XR1, KIF15, PRPF38A…	Up-regulated
BENPORATH_PROLIFERATION_up	0.000109457	0.00109167	0.687402	2.71217	0	137	CKS2, CDCA7, ANLN, CSE1L, PTTG1, EZH2, CDKN3, ATAD2, KPNA2, CDCA5, BUB1, CHAF1B, AURKA, CDK1, GGCT, RAD51AP1, HSPA14, TTK, PRIM2, TFRC, CNIH4, CDC123, TOP2A, GART, PDSS1, UBE2T, CKS1B, CENPM, RFC4, CENPN, DBF4, RAD54L, PROSER1, HDAC2, SUV39H2, DEK, AGFG1, CCNB2, NUDT5, LBR, CENPF, PDCD5, PCNA, EMC8, PRC1, STMN1, DCUN1D5, PSMB4, CMSS1, BIRC5, NCAPG, SNRPG, LGALS8, S100A11, GDI2, RANBP1, C1orf112, …	Up-regulated
BERENJENO_ROCK_SIGNALING_NOT_VIA_RHOA_up	0.715748	0.829036	0.271815	0.832293	5312	28	TSPO, TRIB3, CA6, GPR137B, ALDH2, NQO1, NDRG1, PTGR1, GTF3C5, ATF3	Up-regulated
BERENJENO_ROCK_SIGNALING_NOT_VIA_RHOA_dn	0.0101368	0.0345629	-0.380278	-1.59563	19	48	WSB1, NRP1, ACTA2, NR2F2, F3, EGR1, ROCK1, QKI, IER2, FERMT2, VCAM1, SPARC, KAT2B, XBP1, UGCG, CSF1	Down-regulated
BERENJENO_TRANSFORMED_BY_RHOA_up	0.000100442	0.00109167	0.576981	2.47263	0	520	TMEM97, TFDP1, CKS2, CDCA7, ANLN, HSPH1, CSE1L, PTTG1, CDK8, DIAPH3, EZH2, MRPL16, LSM8, RRS1, STIP1, KPNA2, PA2G4, CDCA5, MKI67, E2F8, PFDN6, DNAJC2, CDC6, BUB1, CHAF1B, PTGES3, AURKA, CDK1, PON2, GGCT, CCNA2, RAD51AP1, PSMA7, RBL1, CACYBP, EIF6, USP1, HSPA14, TTK, ABCE1, BOLA2B, PRIM2, POLR1E, TRIP13, DDX21, TFRC, BRCA1, CKAP2, MRPL18, UTP4, NDE1, TOP2A, PPA1, DCTPP1, GART, RPF2, UBE2T, MYC, KI…	Up-regulated
BERENJENO_TRANSFORMED_BY_RHOA_dn	0.00884956	0.0312015	-0.225661	-1.30937	0	380	OGN, GSN, SSBP2, LAMA2, SFRP2, CCDC80, LPAR1, PDK4, LTBP4, TLR6, CDK14, CSRP2, PDGFRA, MATN2, ID4, CXCL12, CPQ, IL17RA, KLF9, MT1X, JUND, FGFR1, OSMR, COPZ2, SNAI2, SPARCL1, AKAP12, AEBP1, SARDH, ID2, IGSF10, PTX3, PTPRM, GNAI2, PLPP3, ARHGEF25, CPT1A, GHR, MEG3, PLTP, MGP, PMP22, GAS1, CAPN6, FGFR2, ITM2C, STAT3, VEGFB, TCEA3, IL6ST, LXN, LIMA1, TCF7L1, COL6A2, CACNA1A, ID3, RABAC1, RBMS2, LOX, …	Down-regulated
BERENJENO_TRANSFORMED_BY_RHOA_FOREVER_up	0.428366	0.59892	-0.297293	-1.01165	1189	21	PDGFRA, PMP22, LXN, MT1A, DCN, TIMP3	Down-regulated
BERENJENO_TRANSFORMED_BY_RHOA_FOREVER_dn	0.687188	0.807985	0.278222	0.851909	5100	28	HSPH1, ANXA3, TNK2, NOP58, EPHA2, PLAUR, EREG, TOM1L1, PHLDA1, CHD1, LRRFIP1	Up-regulated
BERENJENO_TRANSFORMED_BY_RHOA_REVERSIBLY_dn	0.424971	0.59766	-0.273939	-1.01379	1095	28	PHLDB2, ACTG2, TAGLN, FHL1, THBS1, TNC, PBX3	Down-regulated
BERNARD_PPAPDC1B_TARGETS_up	0.131342	0.261304	0.403663	1.28715	1006	34	WBP4, ZBTB38, NPEPPS, RSL24D1, TULP3, CCDC90B, U2SURP, AGPAT3, LZIC, SNX13, GPATCH2, ANP32A, FRMD4A, TRRAP, COX7C	Up-regulated
BERNARD_PPAPDC1B_TARGETS_dn	0.68371	0.805507	0.249587	0.872755	5602	56	MACC1, ACOT6, GPR153, STC1, RHOF, PROSER2, AP3M2, FAR2, CISH, SH3BGRL2, ITGAL, SH3BP2, PLPP5, MXI1	Up-regulated
BERTUCCI_INVASIVE_CARCINOMA_DUCTAL_VS_LOBULAR_up	0.00575816	0.0220689	0.580669	1.70488	41	23	CDH1, RPIA, DHCR7, YWHAB, UBE2L3, HSPA8, HELZ, NRGN	Up-regulated
BERTUCCI_INVASIVE_CARCINOMA_DUCTAL_VS_LOBULAR_dn	0.000480538	0.00305936	-0.532746	-2.18533	0	44	SFRP1, DPT, PDK4, GDPD2, EMCN, MFAP4, TF, POU2F2, SPARCL1, IGF1, RCSD1, ALDH1L1, FABP4, TNXB, OMD, ERG, TEK, PECAM1, TXNIP, CAV1, NECAB1, TGFBR2, MRGPRF	Down-regulated
BERTUCCI_MEDULLARY_VS_DUCTAL_BREAST_CANCER_up	0.000105854	0.00109167	0.44827	1.8221	0	192	SEC23IP, MKI67, PSMB2, RPS21, CEP55, SLC7A1, TIAL1, CUL2, PPA1, DAZAP1, FBL, MCM10, ANKRD22, NOP16, TYSND1, GTSE1, E2F5, MRTO4, SLC4A1AP, ACSL5, SCML1, NUP93, AGMAT, NFKBIE, MCMBP, PPIF, CD274, HEATR1, TAP1, EMG1, SPATA5L1, NFE2L3, HSPA4, RFX5, PSMG4, NOC3L, CDCP1, BUB3, DDX50, GRWD1, GBP5, PQBP1, ANXA7, DTX3L, PSMB9, PSMA5, IL32, NSMCE4A, MINPP1, RNF207, TNFRSF1B, PLGRKT, PSMB10, C1orf174, ARNTL…	Up-regulated
BERTUCCI_MEDULLARY_VS_DUCTAL_BREAST_CANCER_dn	0.00140845	0.00706476	-0.282099	-1.48666	0	163	SLIT3, PTPRZ1, FSTL1, LAMA2, RCAN1, GUCY1A2, SH3PXD2A, ACTA2, COPZ2, SNAI2, SEMA5A, ANO1, RGS4, NCOA1, ACTG2, ERBB4, TAGLN, ITGB5, FHL1, OBSL1, FERMT2, RNF152, ATP13A4, MYLK, FBXO32, MSRB3, PRICKLE1, ATL1, DLC1, GSTA1, ZCCHC24, CAPN5, ZNF385D, SLC4A3, NME7, CNIH3, CALD1, TIMP3, CAV1, CX3CR1, ACVR1, SNRPN, TPM2, EDNRA, FLNA, MAGI3	Down-regulated
BHAT_ESR1_TARGETS_NOT_VIA_AKT1_up	0.00283375	0.0124108	0.357694	1.46527	26	210	SLC7A5, NIP7, CDC6, NOLC1, GPATCH4, MCM10, SLC25A19, IFRD1, SLC29A1, TPD52L1, CELSR2, MYBBP1A, GNL2, REEP1, MYB, POP1, SRM, HPDL, TGIF2, FRK, MORC4, RAPGEFL1, CCND1, AUNIP, TMEM51, FARP1, SH2D2A, MAT2A, UHRF1, UNC119, ATP6V1C2, KRT15, SULT2B1, FAM102A, CXXC5, COLGALT1, SPATS2L, SOX8, IER5L, C1QTNF6, PHLDA2, OSGIN1, SUSD3, CISH, AHCTF1, MED24, SYBU, DEPTOR, MYEOV, ASB13, MANEAL, FGFRL1, NUDCD1, SN…	Up-regulated
BHAT_ESR1_TARGETS_NOT_VIA_AKT1_dn	0.188666	0.341725	-0.240552	-1.13808	262	84	FRMD6, PDK4, KLF9, NRP1, ESR1, SLITRK6, CHST15, TRAM2, DBP, TSC22D3, PLEKHF1, SYTL2, RXRA, ATXN1, TGFB2, KYNU, RNF144B, NPAS3, PSD3	Down-regulated
BHAT_ESR1_TARGETS_VIA_AKT1_up	0.0127703	0.0417782	0.320688	1.33661	123	274	SLC7A5, PA2G4, NIP7, CDC6, NOLC1, PARP12, GINS2, GPATCH4, MRPS17, IFRD1, SLC29A1, TPD52L1, CELSR2, MYBBP1A, GNL2, REEP1, MYB, POP1, SRM, PPIF, HPDL, TMEM120B, VGF, TGIF2, EIF2S1, RAPGEFL1, ATRIP, PRKAG2, TOMM40, TOE1, CCND1, STK24, RECQL4, NUDC, TMEM51, PAK4, FARP1, IMP4, SH2D2A, MAT2A, UHRF1, UNC119, SLC6A6, ATP6V1C2, KRT15, SULT2B1, MCM7, FAM102A, CXXC5, IER5L, C1QTNF6, OSGIN1, SUSD3, MED24, RA…	Up-regulated
BHAT_ESR1_TARGETS_VIA_AKT1_dn	0.755171	0.857015	0.22797	0.843694	6461	80	HBP1, CDH3, LETMD1, INSIG2, ZKSCAN1, GTF2IRD1, RAB18, CDK6, ZMYND8, UBE2H, EHF, GRHL1	Up-regulated
BHATI_G2M_ARREST_BY_2METHOXYESTRADIOL_up	0.000449135	0.00292001	0.446776	1.72241	3	110	LIMK1, NDC1, CDC6, BUB1, AURKA, PSMA2, TFRC, CBX3, SPC25, CCNB1, RABGEF1, PCNA, PHIP, HACD3, NDUFAB1, SCLY, DLGAP5, ALG13, EIF2S1, MYBL2, NDUFA9, IFNLR1, HSP90AA1, PSMA3, PCMT1, PURB, CDC20, STAG3L1, GALNT3, TACSTD2, CALR, MAD2L1, LSM6, IL24, HSPA5, ASPM, CTPS1, NRAS, FAP, PNN, NEK2, CERK, RAMP1, MAPK1, FAM3C, PBK, SNRPA1, NUF2, GALNT2, TEP1, PLEKHB2, SPCS3	Up-regulated
BHATI_G2M_ARREST_BY_2METHOXYESTRADIOL_dn	0.143509	0.279311	0.310923	1.20923	1289	119	RPS2, PYCR1, IFRD1, ZFAND1, RPL10A, MTHFD2, CSNK2A2, PRKAG1, RPL36A, FANCF, RPL12, ATF4, CEP104, PSAT1, IGBP1, EEF2KMT, CCL20, NOA1, RPS17, SESN2, THRA, GPT2, METTL9	Up-regulated
BHATTACHARYA_EMBRYONIC_STEM_CELL_up	0.000116428	0.00109167	0.618194	2.29522	0	82	TPX2, PTTG1, KPNA2, GNL3, CDK1, PSMA2, DDX21, MTHFD1, RPL7, SRSF7, CCNC, FAM83D, HDAC2, CCNB1, MTHFD2, DSG2, BRIX1, SSB, SEPHS1, KRT8, NPM1, RPS24, LDHB, IMPDH2, MAD2L2, SET, SNRPF, HMGB2, HSPA4, HMGA1, RPL6, RSL24D1, IFITM1, PSMA3, SLC16A1, POU5F1, RPL24, RPLP0, FABP5, RPL4, CCT8, ARL5B, EIF4A1, TUBB, SMS, IDH1, NASP, SERPINH1, RCC2	Up-regulated
BIDUS_METASTASIS_up	0.000105009	0.00109167	0.585222	2.39766	0	211	TFDP1, TPX2, CSE1L, DKC1, CDC6, BUB1, PTGES3, AURKA, CDK1, CCNA2, VDAC1, PRELID3B, UBE2C, DDX21, TFRC, RFC4, CENPN, YTHDF1, MCM10, DBF4, GID8, AMD1, HBS1L, PLK4, CCNB1, CCNB2, TMEM33, CENPF, DHFR, CHEK1, SRSF2, SFPQ, NONO, RLIM, RAE1, PATL1, SSRP1, KLHL23, BIRC5, CKAP5, ADNP, VBP1, HNRNPR, PRKDC, AZIN1, HMGXB4, LARP4, DLGAP5, CBFB, HNRNPA2B1, TUBGCP4, DEPDC1, MAPKAPK5, HNRNPK, WAC, CBLL1, RRN3, H…	Up-regulated
BIDUS_METASTASIS_dn	0.0507674	0.128609	-0.239756	-1.23016	42	140	STAB1, F13A1, CIRBP, GYPC, ZNF45, AKAP13, ACADS, ACACB, SEMA5A, TMEM50B, VWA5A, COX7A1, RAB4B, ATP8B4, PARM1, CLU, FBXO32, LPAR5, PRRX1, RND1, MS4A6A, AMY2B, TULP4, CORO1A, PPM1M, NAGK, PIP, GABARAPL1, STK17B, FADS3, ZNF404, NR1H2, BRMS1, CNRIP1, ZNF641	Down-regulated
BILANGES_RAPAMYCIN_SENSITIVE_GENES_up	0.022886	0.0672149	0.471557	1.52854	176	37	RPL35, INSIG1, NEU1, ITGA6, RPL27, RPS15, RPL22, PPWD1, RPL11, RPL23A, SMC2, BRI3BP, SREK1	Up-regulated
BILANGES_RAPAMYCIN_SENSITIVE_VIA_TSC1_AND_TSC2_up	0.000119632	0.00109167	0.637824	2.29485	0	66	EIF3E, VDAC1, RPS21, NAA10, CCT2, PRDX3, PPM1G, RPL10A, MRPL30, OLA1, CCT4, SLC25A3, RPL36A, PAICS, IMPDH2, AHCY, PSAT1, IGBP1, NUDT21, CNIH1, HSPA8, TCP1, RPS28, BCS1L, HNRNPA1, BTF3, RPL31, TOMM20, RPS26, RPL35A, BRI3BP, SLC25A17, CS, TSPAN15, TUBB, NAP1L1, CRYZ, PPIB, NSA2, SLC25A5, AIMP1	Up-regulated
BILANGES_SERUM_AND_RAPAMYCIN_SENSITIVE_GENES_up	0.000119389	0.00109167	0.751355	2.69912	0	65	RPL13, RPL21, RPL8, RPS13, RPS5, RPL7, RPL14, RPS16, RPL18, EIF3H, RPS7, EIF3M, RPL36A, RPS24, RPS23, RPL29, RPL18A, RPL15, RPL5, RPS9, RPS25, RPS8, RPS14, RPS3, RPS10, RPL6, RPL30, RPL7A, EEF1G, RPS17, RPS4X, EIF3L, RPL24, RPS6, RPL4, UBA52, SPRY2, RPL27A, RPL13A, CS, RPL23, TPT1, EIF4B, RPL10, EEF1B2, FAU, RPS19, EIF3F, RPS3A, RPL28, COX7A2L, RPL32, EEF1A1, RPL26	Up-regulated
BILANGES_SERUM_RESPONSE_TRANSLATION_up	0.000131044	0.00109167	0.662264	2.09936	0	33	RPL21, RPS5, RPL14, EIF3H, RPS7, RPL29, RPL18A, RPS8, RPS3, RPL6, EEF1G, RPS4X, RPS6, RPL4, ARID5B, RPL10, EEF1B2, RPS19, EIF3F, NSA2, EEF1A1, KHSRP	Up-regulated
BILANGES_SERUM_SENSITIVE_GENES_up	0.0160103	0.0502012	0.40011	1.48077	136	80	EIF3E, NAA10, TERF1, RPL10A, LBR, OLA1, RPS18, SUPT16H, AHCY, IGBP1, MRPS5, RRAGD, GBP5, NCEH1, MMP3, JUN, RPL31, ZFYVE27, TOMM20, CS, ARID5B, TUBB, NAP1L1, CRYZ, NSA2, MDN1, RCC2, KHSRP	Up-regulated
BILANGES_SERUM_SENSITIVE_VIA_TSC1_up	0.585271	0.733661	0.317491	0.916251	4227	21	LHFPL4, TUBA4A, TBL2, UTP6, DDB1, PHLDA1, TAC1, GRB14, DUSP4	Up-regulated
BILANGES_SERUM_SENSITIVE_VIA_TSC2_up	0.430723	0.600976	0.338054	1.0261	3173	27	EIF5B, NPM3, NEDD4, THOC2, ATP1A1, KIF1B, SMG6, EIF3A, SNRPD3, GLG1	Up-regulated
BILBAN_B_CLL_LPL_up	0.21841	0.379374	0.330591	1.17367	1807	61	CYP51A1, DNMBP, JADE3, AZIN1, HEATR1, TOP1, ST6GALNAC4, MYBL2, AGPAT5, BCL10, ST6GAL1, CEACAM1, ZFP64, SERINC5	Up-regulated
BILBAN_B_CLL_LPL_dn	0.594595	0.740909	0.281066	0.921523	4663	39	SRSF7, FNBP4, SFPQ, CCNL1, ARGLU1, HMGB2, SULT1A2, TCF7, EIF4A1, SUGP2, ZBTB20	Up-regulated
BILD_CTNNB1_ONCOGENIC_SIGNATURE_up	0.0561309	0.138909	0.369997	1.35946	476	76	FERMT1, CBX3, SMC3, SCML1, DDX52, TAF1D, TOP1, SRSF10, AXIN2, THOC2, ABI2, PHACTR2, DHX36, SECISBP2, LARP4B, GNG12, SREK1, ELF1, SRSF6, FOXQ1, MED31, NCOA3, URB1, RBM25, SCAF11, CLN8, KRTAP2-3, DUSP5, SMG1, PIK3C2A, PLEKHA1	Up-regulated
BILD_E2F3_ONCOGENIC_SIGNATURE_up	0.000103961	0.00109167	0.404016	1.6705	0	235	TMEM97, TFDP1, EZH2, FERMT1, ATAD2, DDAH1, NCKIPSD, SRSF7, GINS1, CDKN2A, PMS2P1, SAC3D1, GAS5, PCNA, REEP1, PWP1, POLE2, MYB, DCLRE1B, CIZ1, IL17RB, TAF1D, PUM3, ANKH, FANCA, AK4, NUP155, BCOR, RPL17, WIPI2, RRAGD, HEY1, CCNE2, TLCD1, RECQL4, FEN1, USPL1, TSPAN5, PXMP2, NCR3LG1, RIPPLY3, JPH1, SOX12, STXBP1, ABHD15, TAF4, HECA, FBXO21, PRRG4, CDK19, CXXC5, EPHA2, BRI3BP, LRP8, EIF4A1, IL1B, RAB1…	Up-regulated
BILD_HRAS_ONCOGENIC_SIGNATURE_up	0.23057	0.393079	0.269858	1.1174	2221	242	FERMT1, SKP2, NOLC1, KLF5, SDC4, PMS2P1, KDM7A, SPRY4, TNS4, OXSR1, GJB3, ITGA2, LPAR2, LGALS8, CCNL1, TUBA4A, PPIF, CD274, TOP1, ELOVL7, CXCL3, MDH1, FBXO9, RRP9, ODC1, HNRNPH1, CCL20, CDCP1, S100A6, TMEM45B, SESN2, CXCL8, GK, TNFRSF10A, LHFPL2, PI3, CASP1, TIA1, STAG3L1, G0S2, MRGPRX3, EPHA2, ARNTL2, PHLDA2, LRP8, IL1B, CASP2, ARG2, PLAUR, SERPINB1, SREK1IP1, EFNB1, NAP1L1, FOXQ1, CXCL5, NDRG1,…	Up-regulated
BILD_MYC_ONCOGENIC_SIGNATURE_up	0.00010553	0.00109167	0.451208	1.83872	0	196	TMEM97, ATIC, PA2G4, DKC1, GNL3, ALG3, NOLC1, PDP1, NUFIP1, SORD, PES1, UTP4, MYC, GPATCH4, CDK2, NOP56, PNPT1, HSPD1, DDX10, DDX28, NOP16, MYBBP1A, MRTO4, ERBB3, LSG1, AIMP2, BOP1, FARSB, NPM1, PAICS, PHB, SRM, C20orf27, NCL, ANAPC1, HSPA1A, ALDH1B1, UTP20, AGPAT5, RRP9, CDCA8, BCS1L, NCR3LG1, C19orf48, TTLL12, FARP1, SMURF1, UTP14A, IMP4, SLC29A2, DDX18, CDK4, TFB2M, SUPV3L1, RHBDF1, GPRC5A, SL…	Up-regulated
BILD_SRC_ONCOGENIC_SIGNATURE_up	0.0680214	0.160978	0.386321	1.35526	558	57	HSPH1, FERMT1, SLC12A2, SLC5A3, ACLY, CSTF3, ZNF12, ORC2, CSNK1A1, SECISBP2, CASP1, TIA1, FANCL, LIPG, LRP8, DHRS1, TRIM33, VPS13B, LNPEP, MMAB	Up-regulated
BIOCARTA_41BB_PATHWAY_up	0.931127	0.961197	0.225239	0.626515	6610	18	CHUK, JUN, MAPK8, TNFRSF9, TRAF2, MAPK14, IL4, IKBKB, MAP3K1	Up-regulated
BIOCARTA_AGR_PATHWAY_up	0.859808	0.925688	0.230074	0.725278	6543	32	PAK1, RAC1, PAK2, PAK4, JUN, DVL1, EGFR, MAPK8, ITGB1, MAPK1, SP1, AGRN, NRG3	Up-regulated
BIOCARTA_AKT_PATHWAY_up	0.451586	0.619384	0.346046	1.00834	3287	22	PIK3R1, CHUK, HSP90AA1, BAD, YWHAH, PDPK1, PPP2CA	Up-regulated
BIOCARTA_ALK_PATHWAY_up	0.88376	0.937531	0.221013	0.716407	6834	37	SMAD5, WNT1, CTNNB1, RFC1, TGFBR3, DVL1, HNF1A, CHRD, BMPR1A, NKX2-5, NPPB	Up-regulated
BIOCARTA_AMAN_PATHWAY_up	0.65239	0.782019	-0.279376	-0.858772	1964	15	ST3GAL4, B3GALT1, MAN2C1	Down-regulated
BIOCARTA_AMI_PATHWAY_up	0.97645	0.98739	-0.173808	-0.585501	2777	20	FGA, COL4A4, F10, COL4A3, F2R, COL4A1, PLAT, PROS1, COL4A6	Down-regulated
BIOCARTA_ARAP_PATHWAY_up	0.639226	0.770654	0.320167	0.879415	4526	17	ARFGEF1, ARFGEF2, CYTH3, ARF1, COPA, ARFGAP3	Up-regulated
BIOCARTA_ARENRF2_PATHWAY_up	0.865446	0.927987	0.249634	0.712274	6193	20	JUN, KEAP1, FXYD2, CRYZ, MAPK8, MAFG, MAPK1, POR, MAPK14	Up-regulated
BIOCARTA_ARF_PATHWAY_up	0.0045185	0.0180858	0.633067	1.73887	31	17	POLR1D, MYC, CDKN2A, PIK3R1, E2F1, RAC1, RB1	Up-regulated
BIOCARTA_AT1R_PATHWAY_up	0.552857	0.707944	0.31001	0.94098	4073	27	PAK1, RAC1, JUN, ELK1, EGFR, MAPK8, CALM3, MAPK1, CALM2, MAP2K2	Up-regulated
BIOCARTA_ATM_PATHWAY_up	0.363738	0.538876	0.382175	1.07769	2599	19	BRCA1, CHEK1, JUN, RAD50, MAPK8, NBN, RAD51, RBBP8	Up-regulated
BIOCARTA_ATRBRCA_PATHWAY_up	0.00167668	0.00803097	0.643277	1.83544	11	20	BRCA2, FANCD2, BRCA1, CHEK1, FANCF, FANCA, FANCE, ATR, FANCG, RAD50, NBN, RAD51, RAD17	Up-regulated
BIOCARTA_BAD_PATHWAY_up	0.53271	0.692283	-0.26526	-0.952675	1424	25	PRKAR2B, PRKACB, KIT, IGF1	Down-regulated
BIOCARTA_BARRESTIN_SRC_PATHWAY_up	0.0875545	0.193663	-0.449666	-1.41706	260	16	KCNA3, KCNA2, MAP2K1, ADCY1	Down-regulated
BIOCARTA_BCELLSURVIVAL_PATHWAY_up	0.293276	0.465982	0.430903	1.14476	2049	15	XIAP, PIK3R1, BIRC5, CCT4, DPF2, CASP3, ITGB1, ZBTB7A, PIK3CA	Up-regulated
BIOCARTA_BCR_PATHWAY_up	0.863845	0.927304	0.228166	0.723281	6591	33	SYK, RAC1, PPP3CB, JUN, PLCG1, ELK1, NFATC3, MAPK8, CALM3, CALM2, LYN	Up-regulated
BIOCARTA_BIOPEPTIDES_PATHWAY_up	0.970954	0.983994	0.190375	0.586882	7253	29	PLCG1, F2, STAT5A, MAPK8, CALM3, CDK5, STAT1, MAPK1, CALM2, MAP2K2	Up-regulated
BIOCARTA_CALCINEURIN_PATHWAY_up	0.238456	0.401909	-0.360296	-1.17753	691	18	NFATC1, NFATC4, PRKCB	Down-regulated
BIOCARTA_CARDIACEGF_PATHWAY_up	0.724673	0.836366	-0.249535	-0.815533	2102	18	PRKCB, FOS, NFKB1, AGT	Down-regulated
BIOCARTA_CARM_ER_PATHWAY_up	0.225331	0.387572	0.400524	1.19666	1650	25	BRCA1, HDAC2, MED1, TBP, CCND1	Up-regulated
BIOCARTA_CASPASE_PATHWAY_up	0.379618	0.554437	0.365357	1.06461	2763	22	XIAP, DFFB, PARP1, CASP1, CASP2, CASP3, CASP9, GZMB, CASP10, LMNB1, BIRC3, APAF1	Up-regulated
BIOCARTA_CCR3_PATHWAY_up	0.841626	0.911698	-0.221982	-0.736384	2401	19	PRKCB, CCL11, MAP2K1, CCR3	Down-regulated
BIOCARTA_CCR5_PATHWAY_up	0.442804	0.61132	-0.316535	-0.997512	1319	16	CXCL12, PRKCB, FOS	Down-regulated
BIOCARTA_CDMAC_PATHWAY_up	0.282456	0.453327	-0.359945	-1.13431	841	16	PRKCB, FOS, NFKB1, MAP2K1, CUZD1	Down-regulated
BIOCARTA_CELLCYCLE_PATHWAY_up	0.000137099	0.00109376	0.757872	2.22516	0	23	TFDP1, CDK1, RBL1, CDKN2A, CDK2, CCNB1, E2F1, CDK7, CDK6, CCND1, RB1, CDK4	Up-regulated
BIOCARTA_CERAMIDE_PATHWAY_up	0.584953	0.733462	-0.270173	-0.919369	1624	21	RIPK1, SMPD1, NFKB1, MAP2K1, CASP8	Down-regulated
BIOCARTA_CHEMICAL_PATHWAY_up	0.557606	0.711335	0.335745	0.933892	3958	18	PARP1, EIF2S1, BAD, CASP3, BAX, STAT1, CASP9, TLN1, APAF1, BID, PRKCA, AKT1	Up-regulated
BIOCARTA_CHREBP_PATHWAY_up	0.531198	0.69188	0.336964	0.9502	3796	19	MLXIPL, PRKAG1, PRKAR2A, PRKAG2, PRKAR1A, PPP2CA	Up-regulated
BIOCARTA_CK1_PATHWAY_up	0.736666	0.844363	-0.255219	-0.804285	2195	16	PRKAR2B, PRKACB, GRM1, PRKACG	Down-regulated
BIOCARTA_COMP_PATHWAY_up	0.0392432	0.104899	-0.461638	-1.5314	111	19	C7, C1QA, C1R, MASP2, C1QB, C3, C1S, MBL2, C1QC, C8A	Down-regulated
BIOCARTA_CREB_PATHWAY_up	0.553473	0.70807	-0.27115	-0.935199	1505	22	PRKAR2B, PRKCB, PRKACB	Down-regulated
BIOCARTA_CSK_PATHWAY_up	0.268541	0.438021	-0.33838	-1.13988	763	20	PRKAR2B, PRKACB, HLA-DRB1, PRKACG, ADCY1	Down-regulated
BIOCARTA_CTCF_PATHWAY_up	0.382421	0.557052	0.358109	1.06105	2801	24	MYC, CDKN2A, PIK3R1, SMAD5, TGFBR3, PPP2CA, CTCF, PTEN	Up-regulated
BIOCARTA_CTLA4_PATHWAY_up	0.860975	0.9266	0.251076	0.716387	6161	20	PIK3R1, PTPN11, CTLA4, CD3E, PIK3CA, CD3D, HLA-DRA	Up-regulated
BIOCARTA_CXCR4_PATHWAY_up	0.506307	0.669885	-0.29159	-0.967294	1444	19	CXCL12, PRKCB, NFKB1, MAP2K1	Down-regulated
BIOCARTA_CYTOKINE_PATHWAY_up	0.889629	0.940505	-0.208898	-0.692981	2538	19	IL6, IFNA1, IFNG, IL1A, IL13, IL10, IL5	Down-regulated
BIOCARTA_DC_PATHWAY_up	0.526027	0.688849	-0.295064	-0.945362	1535	17	ANPEP, IFNA1, TLR7, IFNG, IL13, IL10, IL5, CD5, CSF2	Down-regulated
BIOCARTA_DEATH_PATHWAY_up	0.913532	0.953679	0.218099	0.672347	6824	29	XIAP, DFFB, CHUK, GAS2, CASP3, SPTAN1, CASP9, CASP10, TRAF2	Up-regulated
BIOCARTA_ECM_PATHWAY_up	0.630694	0.765816	-0.268	-0.889038	1799	19	GSN, ROCK1, MAP2K1	Down-regulated
BIOCARTA_EDG1_PATHWAY_up	0.407571	0.58172	-0.296692	-1.0233	1108	22	PDGFRA, PRKCB, S1PR1, SMPD1	Down-regulated
BIOCARTA_EFP_PATHWAY_up	0.00386266	0.0158465	0.668058	1.77481	26	15	CDK8, CDK1, CDK2, CCNB1, CCNB2, CDK7, CDK6, SMURF1, CDK4, SFN, SMURF2, CDK5	Up-regulated
BIOCARTA_EGF_PATHWAY_up	0.433573	0.602396	0.337505	1.02444	3194	27	PIK3R1, CSNK2A1, JUN, PLCG1, ELK1, RASA1, STAT5A, EGFR, MAPK8, EGF, STAT1, PIK3CA, SRF	Up-regulated
BIOCARTA_EICOSANOID_PATHWAY_up	0.00220507	0.0100994	-0.558207	-1.92527	5	22	HPGDS, PTGIS, PTGS1, PTGER1, PTGER2, CYSLTR1, PTGFR, CYSLTR2, ALOX5, PTGER4, PTGIR, PTGES, TBXA2R	Down-regulated
BIOCARTA_EIF_PATHWAY_up	0.00413047	0.0166923	0.651132	1.7575	28	16	EIF2S2, EIF6, EIF4A2, EIF1AX, EIF2S1, EIF5, EIF4G2, EIF4A1, EIF1, EIF4E, EIF3A, EEF2K	Up-regulated
BIOCARTA_EIF4_PATHWAY_up	0.285383	0.456675	0.384447	1.13909	2090	24	EIF4A2, EIF4EBP1, PIK3R1, EIF4G2, EIF4A1, PDPK1, MKNK1, PTEN, MAPK1, EIF4E, PIK3CA, MAPK14	Up-regulated
BIOCARTA_EPO_PATHWAY_up	0.441802	0.610328	0.359723	1.01438	3157	19	CSNK2A1, JUN, PLCG1, ELK1, STAT5A, MAPK8	Up-regulated
BIOCARTA_ERAD_PATHWAY_up	0.00503637	0.0197802	0.614922	1.73401	35	19	UBE2I, MOGS, CUL1, UBA2, UGGT1, CANX, GANAB, RBX1, MAN1A2, SAE1	Up-regulated
BIOCARTA_ERK_PATHWAY_up	0.815714	0.893346	0.250273	0.759661	6010	27	MYC, DPM2, ELK1, PPP2CA, EGFR, ITGB1, MKNK1, MAPK1, MAP2K2, KLK2, NGF	Up-regulated
BIOCARTA_ERYTH_PATHWAY_up	0.0488048	0.124321	-0.496017	-1.5247	146	15	TGFB3, IL6, IGF1, TGFB1, TGFB2, EPO, FLT3	Down-regulated
BIOCARTA_ETS_PATHWAY_up	0.121152	0.2461	0.487671	1.3395	857	17	RBL1, HDAC2, E2F1, ETS2, JUN, E2F4	Up-regulated
BIOCARTA_FAS_PATHWAY_up	0.087234	0.19314	0.441092	1.3694	655	30	DFFB, RIPK2, PAK1, FAF1, PRKDC, PARP1, PAK2, RB1, JUN, CASP3, MAPK8	Up-regulated
BIOCARTA_FCER1_PATHWAY_up	0.691739	0.812231	0.261774	0.858271	5425	39	SYK, PIK3R1, PPP3CB, PAK2, JUN, PLCG1, ELK1, FCER1G, NFATC3, MAPK8, CALM3, MAPK1, CALM2, LYN, PIK3CA	Up-regulated
BIOCARTA_FMLP_PATHWAY_up	0.797859	0.883814	-0.20836	-0.807443	1862	34	NCF1, NFATC1, NFATC4, NFKB1, MAP2K1	Down-regulated
BIOCARTA_G1_PATHWAY_up	0.000404149	0.00272408	0.641607	1.96459	2	28	TFDP1, SKP2, CDK1, CDKN2A, CDK2, DHFR, E2F1, CDK6, CCND1, RB1, ATR, CDK4	Up-regulated
BIOCARTA_G2_PATHWAY_up	0.000136482	0.00109376	0.707935	2.09756	0	24	PLK1, CDK1, BRCA1, CCNB1, CDC25B, CHEK1, CDC25C, PRKDC, WEE1, ATR, YWHAH, YWHAQ	Up-regulated
BIOCARTA_GCR_PATHWAY_up	0.933352	0.961952	0.225341	0.618951	6609	17	PIK3R1, HSP90AA1, CALM3, CALM2, PIK3CA, PIK3CG, CORIN, AKT1	Up-regulated
BIOCARTA_GH_PATHWAY_up	0.853399	0.920168	-0.204072	-0.750073	2246	27	PRKCB, GHR, MAP2K1, INSR, SLC2A4	Down-regulated
BIOCARTA_GLEEVEC_PATHWAY_up	0.453386	0.621112	0.343656	1.009	3306	23	MYC, PIK3R1, BAD, JUN, STAT5A, MAPK8, STAT1, PIK3CA, PIK3CG, AKT1, RAF1, MAP3K1, MAPK3, CRKL	Up-regulated
BIOCARTA_GPCR_PATHWAY_up	0.0846092	0.188234	-0.358999	-1.34827	209	30	PRKAR2B, NFATC1, NFATC4, PRKCB, PRKACB, FOS, MAP2K1, PRKACG, ADCY1	Down-regulated
BIOCARTA_GRANULOCYTES_PATHWAY_up	0.878827	0.936108	0.256079	0.680317	6142	15	CSF3, CXCL8, ITGAL, ITGAM, C5, ICAM1, ICAM2, SELPLG, TNF	Up-regulated
BIOCARTA_GSK3_PATHWAY_up	0.0676261	0.16029	0.503137	1.43559	483	20	PIK3R1, WNT1, CCND1, CTNNB1, EIF2AK2, PDPK1, PPP2CA, DVL1, LEF1	Up-regulated
BIOCARTA_HCMV_PATHWAY_up	0.76405	0.862393	0.284381	0.781118	5410	17	PIK3R1, RB1, MAPK1, MAP2K2, SP1, PIK3CA, MAPK14, PIK3CG, AKT1, MAP3K1, MAPK3	Up-regulated
BIOCARTA_HDAC_PATHWAY_up	0.836086	0.908212	0.247421	0.73923	6125	25	PIK3R1, CABIN1, PPP3CB, YWHAH, CALM3, CAMK1G, CALM2, PIK3CA, MAPK14, PIK3CG, MAPK7, AVP	Up-regulated
BIOCARTA_HER2_PATHWAY_up	0.0391433	0.104693	-0.432643	-1.51558	105	23	IL6R, IL6, ESR1, GRIP1, ERBB4, STAT3, IL6ST, MAP2K1	Down-regulated
BIOCARTA_HIF_PATHWAY_up	0.147783	0.286177	0.490983	1.30438	1032	15	VHL, HSP90AA1, ASPH, JUN, P4HB, LDHA, COPS5	Up-regulated
BIOCARTA_HIVNEF_PATHWAY_up	0.751922	0.855324	0.23667	0.827586	6161	56	XIAP, DFFB, PRKDC, PARP1, CHUK, PAK2, RB1, TNFRSF1B, BAG4, RASA1, CASP2, CASP3, MAPK8, CDK11B, SPTAN1, CASP9, TRAF2, DAXX, PRKCD, ACTG1, LMNB1, MAP2K7, CDK11A, BIRC3, APAF1, TNFRSF1A, BID	Up-regulated
BIOCARTA_IGF1_PATHWAY_up	0.441722	0.610328	0.351143	1.01337	3190	21	PIK3R1, CSNK2A1, JUN, ELK1, PTPN11, RASA1, MAPK8	Up-regulated
BIOCARTA_IGF1MTOR_PATHWAY_up	0.147594	0.285932	0.461255	1.30068	1054	19	EIF2S2, EIF4EBP1, PIK3R1, EIF2S1, PDPK1, PPP2CA, PTEN, EIF4E, PIK3CA	Up-regulated
BIOCARTA_IGF1R_PATHWAY_up	0.914313	0.953679	0.227024	0.666557	6668	23	PIK3R1, PRKAR2A, BAD, YWHAH, PRKAR1A	Up-regulated
BIOCARTA_IL12_PATHWAY_up	0.877715	0.935746	-0.212687	-0.70555	2504	19	IL18R1, STAT4, TYK2, IL12RB1, IFNG, CXCR3, MAP2K6, JAK2	Down-regulated
BIOCARTA_IL17_PATHWAY_up	0.686981	0.807985	0.317109	0.842453	4801	15	CSF3, CXCL8, IL3, CD3E, CD58, CD3D, CD2	Up-regulated
BIOCARTA_IL1R_PATHWAY_up	0.355117	0.531837	-0.279385	-1.05714	863	31	TGFB3, IL6, IL1R1, NFKB1, TGFB1, TGFB2, IFNA1, IRAK3	Down-regulated
BIOCARTA_IL2_PATHWAY_up	0.326191	0.498327	0.381064	1.11038	2374	22	SYK, CSNK2A1, JUN, ELK1, STAT5A, MAPK8	Up-regulated
BIOCARTA_IL2RB_PATHWAY_up	0.325187	0.497288	0.340023	1.10217	2514	37	MYC, SYK, PPIA, PIK3R1, E2F1, BAD	Up-regulated
BIOCARTA_IL3_PATHWAY_up	0.560425	0.713395	-0.298233	-0.916737	1687	15	FOS, MAP2K1, IL3RA, SHC1, SOS1, JAK2, STAT5B	Down-regulated
BIOCARTA_IL6_PATHWAY_up	0.177106	0.326323	-0.36087	-1.228	491	21	IL6R, IL6, FOS, STAT3, IL6ST, MAP2K1	Down-regulated
BIOCARTA_IL7_PATHWAY_up	0.902008	0.947284	0.244434	0.659761	6332	16	PIK3R1, STAT5A, PIK3CA, PIK3CG, IL7	Up-regulated
BIOCARTA_INFLAM_PATHWAY_up	0.0687429	0.162029	-0.381053	-1.40057	180	27	TGFB3, IL6, HLA-DRB1, TGFB1, TGFB2, IFNA1, CSF1, IFNG, IL1A, IL13, CD4, IL10, IL5	Down-regulated
BIOCARTA_INSULIN_PATHWAY_up	0.491694	0.656401	0.338915	0.97808	3551	21	PIK3R1, CSNK2A1, JUN, ELK1, PTPN11, RASA1, MAPK8	Up-regulated
BIOCARTA_INTEGRIN_PATHWAY_up	0.887961	0.93968	0.221371	0.705882	6807	34	RAPGEF1, JUN, CSK, ACTN2, MAPK8, BCAR1, ITGB1, CAPN1, MAPK1, MAP2K2, TLN1, ACTN3, RHOA, RAF1, MAPK3, RAP1A, CRKL, TNS1	Up-regulated
BIOCARTA_INTRINSIC_PATHWAY_up	0.904357	0.949101	-0.200879	-0.703694	2448	23	FGA, COL4A4, F10, COL4A3, F2R, F5, COL4A1, F9, PROS1, COL4A6	Down-regulated
BIOCARTA_KERATINOCYTE_PATHWAY_up	0.671233	0.7959	-0.215271	-0.89574	1371	46	PRKCB, RIPK1, FOS, NFKB1, FAS, HOXA7, MAP2K1, ETS1	Down-regulated
BIOCARTA_LAIR_PATHWAY_up	0.596233	0.741704	-0.282003	-0.903517	1740	17	C7, IL6, VCAM1, C3, SELP, IL1A, ITGB2, C6	Down-regulated
BIOCARTA_LIS1_PATHWAY_up	0.199217	0.355272	0.437581	1.23393	1423	19	CSNK2A1, DCTN6, LRP8, NDEL1, DYNLL1, DNAH6, CDK5, PAFAH1B1	Up-regulated
BIOCARTA_LONGEVITY_PATHWAY_up	0.930279	0.960752	-0.210852	-0.648138	2801	15	IGF1, GHR	Down-regulated
BIOCARTA_MAL_PATHWAY_up	0.317012	0.489831	0.396989	1.11946	2265	19	LIMK1, RAC1, DIAPH1, HNF1A, MAPK8, MAP4K2, MAPK1, MAP2K2, SRF, MAL, RHOA, RAF1, MAP3K1, MAPK3	Up-regulated
BIOCARTA_MAPK_PATHWAY_up	0.900456	0.946085	0.198922	0.737154	7706	81	MYC, PAK1, RAC1, MAPK4, MAPKAPK5, MAPK13, CHUK, PAK2, MAPK9, JUN, ELK1, MAP4K3, MAPK8, RPS6KA4, MAP4K2, MKNK1, STAT1, MAPK1, MAX, MAP2K2, MAP3K8, SP1, TRAF2, DAXX, MAP2K5, MAP3K4, MAPK14, MAP3K13, MAP2K7, MAPKAPK3, MAPK7	Up-regulated
BIOCARTA_MCALPAIN_PATHWAY_up	0.745523	0.850259	0.284458	0.802137	5328	19	PRKAR2A, EZR, PRKAR1A, EGFR, ITGB1, EGF, CAPN1, TLN1, PRKAR1B	Up-regulated
BIOCARTA_MCM_PATHWAY_up	0.00478873	0.0189532	0.626071	1.74145	33	18	CDC6, ORC5, CDK2, ORC3, ORC2, ORC4, MCM3, MCM7	Up-regulated
BIOCARTA_MEF2D_PATHWAY_up	0.596056	0.741704	0.326189	0.907311	4231	18	HDAC2, CABIN1, PPP3CB	Up-regulated
BIOCARTA_MET_PATHWAY_up	0.219499	0.380857	0.377226	1.1958	1674	33	MET, PIK3R1, PAK1, RAPGEF1, JUN, ELK1, PTPN11, RASA1, MAPK8, DOCK1, ITGB1, PTEN, MAPK1, MAP2K2, PIK3CA, CRK	Up-regulated
BIOCARTA_MITOCHONDRIA_PATHWAY_up	0.339675	0.513943	0.388867	1.09656	2427	19	XIAP, DFFB, AIFM1, BAK1, CASP3, ENDOG, BAX, CASP9, BIRC3, APAF1, BID	Up-regulated
BIOCARTA_MPR_PATHWAY_up	0.452519	0.620109	0.348828	1.00669	3268	21	CDK1, CCNB1, CDC25C, PRKAR2A, CAP1, PRKAR1A	Up-regulated
BIOCARTA_MTA3_PATHWAY_up	0.316197	0.489027	0.402723	1.12019	2244	18	CDH1, TUBA4A, ALDOA, GAPDH, TUBA3C, PDZK1, CTSD, TUBA1A, HSPB1, MTA1	Up-regulated
BIOCARTA_MTOR_PATHWAY_up	0.0105205	0.0355288	0.576879	1.66482	75	21	EIF4A2, EIF4EBP1, PIK3R1, RHEB, EIF4G2, EIF4A1, PDPK1, PPP2CA, MKNK1, PTEN, EIF4E, PIK3CA, EIF3A	Up-regulated
BIOCARTA_NDKDYNAMIN_PATHWAY_up	0.170243	0.317002	0.479137	1.27291	1189	15	NME1, PPP3CB, SYNJ2, AP2A1, CALM3, CALM2, AP2M1, SYNJ1, EPS15, PPP3CC, DNM1, PICALM	Up-regulated
BIOCARTA_NFAT_PATHWAY_up	0.613291	0.753197	-0.217247	-0.925586	1171	51	PRKAR2B, NFATC1, NFATC4, PRKACB, IGF1, MAP2K1, AGT, MEF2C, PRKACG, CAMK1	Down-regulated
BIOCARTA_NFKB_PATHWAY_up	0.687185	0.807985	-0.252331	-0.858654	1908	21	RIPK1, IL1R1, NFKB1, RELA, IL1A, IKBKG, NFKBIA, TAB1, FADD	Down-regulated
BIOCARTA_NGF_PATHWAY_up	0.224675	0.386898	0.422034	1.20418	1607	20	DPM2, PIK3R1, CSNK2A1, JUN, PLCG1, ELK1, MAPK8, PIK3CA, KLK2, NGF, PIK3CG	Up-regulated
BIOCARTA_NKCELLS_PATHWAY_up	0.0425352	0.111434	0.540049	1.50217	301	18	SYK, PIK3R1, PAK1, RAC1, B2M	Up-regulated
BIOCARTA_NKT_PATHWAY_up	0.000373832	0.00258371	-0.626256	-2.24919	0	25	TGFB3, IL18R1, CD28, CD40LG, TGFB1, TGFB2, CCR3, IL4R, CXCR4, IL12RB1, CCL3, IFNG, CCR7, CXCR3, CCR4, CD4, IL5	Down-regulated
BIOCARTA_NO1_PATHWAY_up	0.427685	0.598915	-0.273476	-1.01208	1102	28	RYR2, PRKAR2B, PRKACB	Down-regulated
BIOCARTA_NO2IL12_PATHWAY_up	0.525896	0.688849	-0.305474	-0.938997	1583	15	STAT4, TYK2, IL12RB1, IFNG, CXCR3, CD4, JAK2	Down-regulated
BIOCARTA_NOS1_PATHWAY_up	0.153708	0.294921	-0.369029	-1.25576	426	21	PRKAR2B, PRKCB, PRKACB, GRIN2A, DLG4	Down-regulated
BIOCARTA_NTHI_PATHWAY_up	0.93353	0.961952	-0.190632	-0.667796	2527	23	NR3C1, NFKB1, DUSP1, TGFBR2, RELA, SMAD4, MAP2K6, NFKBIA, TGFBR1, CREBBP	Down-regulated
BIOCARTA_NUCLEARRS_PATHWAY_up	0.961884	0.978033	-0.169346	-0.656252	2245	34	CYP2C9, CYP1A2, ABCB1, ABCD2, ABCD3, CYP4B1, CYP4A22, CYP24A1, RARG	Down-regulated
BIOCARTA_P38MAPK_PATHWAY_up	0.891332	0.940866	0.219389	0.708292	6889	36	MYC, RAC1, MAPKAPK5, ELK1, MKNK1, STAT1, HSPB1, MAX, TRAF2, DAXX, MAPK14	Up-regulated
BIOCARTA_P53_PATHWAY_up	0.0326164	0.0897391	0.571123	1.54154	228	16	CDK2, PCNA, E2F1, CCND1, RB1, CDK4	Up-regulated
BIOCARTA_P53HYPOXIA_PATHWAY_up	0.13995	0.274176	0.451103	1.30184	1010	21	DNAJB1, HSPA1A, HSP90AA1, NQO1, MAPK8, IGFBP3, FHL2, BAX, RPA1	Up-regulated
BIOCARTA_PAR1_PATHWAY_up	0.91801	0.954072	-0.198549	-0.658648	2619	19	PRKCB, ROCK1	Down-regulated
BIOCARTA_PDGF_PATHWAY_up	0.797387	0.883575	0.252213	0.772269	5918	28	PIK3R1, CSNK2A1, JUN, PLCG1, ELK1, RASA1, STAT5A, MAPK8	Up-regulated
BIOCARTA_PDZS_PATHWAY_up	0.668493	0.794494	-0.267758	-0.857875	1951	17	NCAM1, DLG4, PCLO, GRIN1, DLG2, DLG1	Down-regulated
BIOCARTA_PGC1A_PATHWAY_up	0.878398	0.936108	0.25637	0.681089	6139	15	PPP3CB, YWHAH, CALM3, CAMK1G, CALM2, PPARA	Up-regulated
BIOCARTA_PITX2_PATHWAY_up	0.0360348	0.0972833	0.564192	1.52283	252	16	MED1, WNT1, CTNNB1, LDB1, KAT5, DVL1, LEF1, TRRAP	Up-regulated
BIOCARTA_PML_PATHWAY_up	0.530641	0.69135	0.347191	0.953642	3757	17	RB1, SUMO1, TNFRSF1B, SIRT1, SP100, DAXX, TNFRSF1A	Up-regulated
BIOCARTA_PPARA_PATHWAY_up	0.463279	0.629977	0.290557	1.00266	3746	52	MRPL11, MYC, DUT, PIK3R1, MED1, PRKAR2A, HSPA1A, HSP90AA1, RB1, JUN	Up-regulated
BIOCARTA_PROTEASOME_PATHWAY_up	0.000139899	0.00109516	0.815103	2.2985	0	19	PSMA2, PSMB2, PSMA7, UBE2A, PSMB4, PSMB3, PSMB5, UBA1, PSMA6, PSMB7, PSMA1, RPN2, PSMA3, PSMA5, PSMB1, RPN1, PSMA4	Up-regulated
BIOCARTA_PTDINS_PATHWAY_up	0.012476	0.0409901	0.557118	1.63573	90	23	RAC1, BAD, GSK3A, EEA1, PLCG1, ARF1, PFKL, PDPK1, AP2A1, PFKM	Up-regulated
BIOCARTA_PTEN_PATHWAY_up	0.246761	0.411564	0.425796	1.18437	1751	18	PIK3R1, PDPK1, EGFR, BCAR1, ITGB1, PTEN, MAPK1, PIK3CA, CDKN1B, AKT1, MAPK3, PDK2	Up-regulated
BIOCARTA_PYK2_PATHWAY_up	0.467499	0.633509	0.329714	1.00079	3444	27	PAK1, RAC1, JUN, PLCG1, MAPK8, BCAR1, CALM3, MAPK1, CALM2, MAP2K2	Up-regulated
BIOCARTA_RAC1_PATHWAY_up	0.124308	0.25107	0.458937	1.32445	897	21	LIMK1, PIK3R1, PAK1, RAC1	Up-regulated
BIOCARTA_RACCYCD_PATHWAY_up	0.00122233	0.00633601	0.615708	1.85459	8	26	TFDP1, CDK2, PIK3R1, E2F1, PAK1, RAC1, CDK6, CHUK, CCND1, RB1, CDK4	Up-regulated
BIOCARTA_RAS_PATHWAY_up	0.212608	0.371265	0.416468	1.21355	1547	22	RALA, PIK3R1, RAC1, CHUK, BAD, ELK1, RALGDS, CASP9, RALBP1, PIK3CA	Up-regulated
BIOCARTA_RELA_PATHWAY_up	0.921173	0.955421	0.237482	0.630909	6438	15	CHUK, TNFRSF1B, TRAF6	Up-regulated
BIOCARTA_RHO_PATHWAY_up	0.64701	0.776947	0.302447	0.872835	4673	21	LIMK1, PIP5K1B, BAIAP2, DIAPH1, PFN1	Up-regulated
BIOCARTA_SHH_PATHWAY_up	0.120429	0.244956	-0.425491	-1.34087	358	16	PRKAR2B, GLI3, PRKACB, PRKACG, SMO	Down-regulated
BIOCARTA_SPPA_PATHWAY_up	0.676619	0.800225	-0.267166	-0.841933	2016	16	PRKCB, PTGS1, MAP2K1	Down-regulated
BIOCARTA_SPRY_PATHWAY_up	0.743999	0.849362	0.290552	0.79807	5268	17	SPRY4, SPRY2, RASA1, EGFR, EGF, MAPK1	Up-regulated
BIOCARTA_STATHMIN_PATHWAY_up	0.131759	0.261642	0.46071	1.31453	942	20	CDK1, CCNB1, STMN1, PRKAR2A, MAPK13, TSG101, PRKAR1A, RB1CC1, UHMK1, HSPA5	Up-regulated
BIOCARTA_STEM_PATHWAY_up	0.984728	0.99236	-0.177003	-0.544091	2965	15	IL6, EPO, CSF1	Down-regulated
BIOCARTA_STRESS_PATHWAY_up	0.912652	0.953679	0.225608	0.668462	6686	24	ATF1, CHUK, JUN, CASP2, MAPK8, MAP4K2, TRAF2, MAPK14	Up-regulated
BIOCARTA_TALL1_PATHWAY_up	0.820385	0.896541	-0.241395	-0.742024	2470	15	TNFRSF17, NFKB1	Down-regulated
BIOCARTA_TCR_PATHWAY_up	0.922037	0.956102	0.205528	0.684197	7296	43	PIK3R1, RAC1, PPP3CB, JUN, PLCG1, ELK1, RASA1, NFATC3, MAPK8, CD3E, CALM3, CALM2, PIK3CA, CD3D	Up-regulated
BIOCARTA_TEL_PATHWAY_up	0.0134143	0.0435137	0.599314	1.64616	94	17	MYC, TERF1, XRCC6, XRCC5, HSP90AA1, RB1, PPP2CA, EGFR	Up-regulated
BIOCARTA_TFF_PATHWAY_up	0.97052	0.983988	0.195912	0.580473	7110	24	PIK3R1, BAD, CTNNB1, EGFR, ITGB1, MAPK1, CASP9, PIK3CA, TFF2, PIK3CG, APAF1, RHOA, AKT1, MAPK3, GH1	Up-regulated
BIOCARTA_TGFB_PATHWAY_up	0.0602663	0.146234	-0.438432	-1.45441	171	19	SMAD7, TGFB3, MAP2K1, TGFB1, TGFB2, TGFBR2, SMAD4, SKIL	Down-regulated
BIOCARTA_TH1TH2_PATHWAY_up	0.0226782	0.0667867	-0.468794	-1.59525	62	21	IL18R1, CD28, HLA-DRB1, CD40LG, IL4R, IL12RB1, IFNG, IL12A	Down-regulated
BIOCARTA_TID_PATHWAY_up	0.754617	0.857015	0.282037	0.795312	5393	19	HSPA1A, DNAJA3, RB1, TNFRSF1B, USH1C	Up-regulated
BIOCARTA_TNFR1_PATHWAY_up	0.12167	0.247044	0.425099	1.31048	908	29	DFFB, PAK1, PRKDC, PARP1, PAK2, RB1, JUN, BAG4, CASP2, CASP3, MAPK8	Up-regulated
BIOCARTA_TNFR2_PATHWAY_up	0.913452	0.953679	-0.211612	-0.666863	2722	16	RIPK1, NFKB1, DUSP1, RELA, IKBKG, NFKBIA	Down-regulated
BIOCARTA_TOB1_PATHWAY_up	0.413455	0.587749	-0.309381	-1.02631	1179	19	TGFB3, CD28, TGFB1, TGFB2, TGFBR2, IFNG, SMAD4	Down-regulated
BIOCARTA_TOLL_PATHWAY_up	0.773577	0.868802	0.264102	0.789069	5667	25	CHUK, JUN, ELK1, TRAF6, EIF2AK2, MAPK8, PPARA, MYD88, MAPK14, PGLYRP1	Up-regulated
BIOCARTA_TPO_PATHWAY_up	0.844821	0.912936	0.246597	0.73065	6189	24	PIK3R1, CSNK2A1, JUN, PLCG1, RASA1, STAT5A, MPL, STAT1, PIK3CA	Up-regulated
BIOCARTA_VDR_PATHWAY_up	0.298076	0.470361	0.381323	1.12983	2183	24	SMARCC1, MED1, ACTL6A, SUPT16H, COPS2, CARM1, TOP2B, BAZ1B, SMARCD1, PRMT1, SMARCE1	Up-regulated
BIOCARTA_VEGF_PATHWAY_up	0.149953	0.289042	0.421195	1.27846	1104	27	EIF2S2, PIK3R1, VHL, EIF1AX, EIF2S1, ELAVL1, PLCG1	Up-regulated
BIOCARTA_VIP_PATHWAY_up	0.409625	0.583747	-0.282311	-1.02382	1080	26	PRKAR2B, NFATC1, PRKACB, EGR2, NFKB1, VIP, PRKACG	Down-regulated
BIOCARTA_WNT_PATHWAY_up	0.0832537	0.186028	0.469908	1.39231	609	24	MYC, WNT1, CSNK2A1, CCND1, CTNNB1, PPP2CA, DVL1, HNF1A, FRAT1, TLE1, CTBP1, BTRC, PPARD	Up-regulated
BLALOCK_ALZHEIMERS_DISEASE_INCIPIENT_up	0.494227	0.658827	0.236444	1.00146	4879	366	RPL13, SMARCC1, RBL1, USP1, LSM5, MET, APOC1, PDSS1, NSDHL, EIF5B, DBF4, ITGA6, ERLIN2, PABPC3, CUL4A, TEX264, NONO, PIBF1, CSNK2A2, ATG3, CCDC59, PHF20, NCAPG, MED1, SCLY, CLIC1, RAB2A, ACTR8, PRKAR2A, ST6GALNAC4, PGM3, ZMYM5, CPNE3, PTBP3, TSPAN31, ERAL1, GRM6, STAG2, SLC35A3, SSR2, PLXNB2, THOC2, UROD, ANP32B, HMGB3, RBCK1, CLDN18, PI4KB, ZHX3, MR1, HERC5, PPIG, ARPC1B, APOC4, CALML4, SP3, CEP…	Up-regulated
BLALOCK_ALZHEIMERS_DISEASE_INCIPIENT_dn	0.000107712	0.00109167	0.519299	2.0791	0	159	TFDP1, CKS2, HSPH1, ATIC, CACYBP, CCT5, ORC5, CUL2, HSP90AB1, LAMTOR2, CCT2, PPA1, TOX3, MPV17, UTP18, AHSA1, RPL14, GRPEL1, PDIA6, SEC23B, CCT4, LGALS8, CCNL1, CDK7, PARP1, DNAJA1, PFDN2, RPL38, TOP1, PDHA1, RAD51C, ZNF207, PPP3R1, PSMC2, CSNK2A1, RPE, MFN1, SNU13, RAPGEFL1, CCT3, RPL6, HSP90AA1, AP3S1, ASPH, CDC27, RPN2, DNAJC8, REEP5, UBP1, NDUFB3, NSFL1C, ZFR, TMEM147, MKKS, IPO7, MRPL15, FCE…	Up-regulated
BLANCO_MELO_BETA_INTERFERON_TREATED_BRONCHIAL_EPITHELIAL_CELLS_up	0.556457	0.710505	0.231575	0.979793	5489	358	CLDN1, FERMT1, UBXN2A, GPR180, TFRC, PARP12, SDC4, KDM7A, PNPT1, ZNF107, USP12, ITGA2, RGMB, KRT8, STARD4, ZNF800, CD274, ZNFX1, SLC39A10, TAP1, ELOVL7, RIF1, CXCL3, NPC1, FMR1, NFE2L3, EIF5, SLC2A12, CYP2J2, CDCP1, STAT2, PTAFR, C6orf62, IDO1, RPPH1, CXCL8, GBP5, NT5C3A, CAB39, PGM2L1, TNFRSF10A, DTX3L, DCP1A, FOXN2, MMP3, HEPHL1, ARL5B, SYNJ2, C17orf67, SP140L, G0S2, SPRY2, PHF11, ELK4, DDX60L,…	Up-regulated
BLANCO_MELO_BETA_INTERFERON_TREATED_BRONCHIAL_EPITHELIAL_CELLS_dn	0.923671	0.957149	0.187507	0.763119	8736	194	PLBD1, PRRT3-AS1, E2F8, DGAT2, ANKRD22, RMI2, E2F1, PLEKHH3, SLPI, SLC25A27, RAPGEFL1, CES3, HEY1, TMEM45B, EFNA4, SYT8, ANXA9, ZNF467, SULT2B1, ATP6V1E2, EPHB3, CXXC5, RBBP8NL, TMPRSS13, CEACAM5, CNFN, NLRX1, CARD14, CBX2, LCE3D, LMCD1, NCCRP1, UNC13D, EFNA3, SERPINB3, SPRR1A, NGEF, GRHL3, EVPL, WDR90, CALML5, KLK13, SLC43A2, ARHGAP33, DDX12P, ALDH3B2, LRRC20, CHTF18, TCN1, RASL11B, CYSRT1, KLK8…	Up-regulated
BLANCO_MELO_BRONCHIAL_EPITHELIAL_CELLS_INFLUENZA_A_DEL_NS1_INFECTION_dn	0.000107204	0.00109167	0.601112	2.42057	0	171	CDCA7, ANLN, PLK1, PTTG1, HJURP, DIAPH3, CCDC34, XRCC2, CDKN3, PRR11, CDCA5, SKA3, E2F8, CDC6, AURKA, CCNA2, RBL1, TTK, UBE2C, CEP55, BRCA1, TOP2A, UBE2T, GINS2, CENPM, MCM10, RAD54L, SPC25, NCAPG2, PLK4, CCNB2, CENPF, DHFR, PRC1, NEIL3, KIF20A, CENPO, E2F1, CDC25C, BIRC5, NCAPG, CLSPN, MIPEPP3, PRIM1, TROAP, TCF19, SHCBP1, RFXAP, SFXN2, TFAP4, KIF11, MYBL2, CIT, EXO1, WDR76, TACC3, CDCA8, KIF2C,…	Up-regulated
BLANCO_MELO_BRONCHIAL_EPITHELIAL_CELLS_INFLUENZA_A_INFECTION_up	0.387332	0.562258	0.268379	1.05062	3509	127	ZNF736, TFRC, SLC5A3, EPSTI1, HACD2, ZKSCAN1, ZNFX1, TAP1, RAD54L2, NOMO2, IPO11, RALGAPA2, NOMO3, UBXN7, CXCL11, DTX3L, HEPHL1, HERC5, ARL5B, TLN2, EIF2AK2, BATF2, DPP4, VWA7, NR1D1, EGFR, MED13, MAN1A2, CXCL10, HELZ2, SMG1P1, LNPEP, FSD1L, MAPK8IP2, PARP9, GBP1, GTF3C4, SIRPB1, ROCK2, IGF2R	Up-regulated
BLANCO_MELO_BRONCHIAL_EPITHELIAL_CELLS_INFLUENZA_A_INFECTION_dn	0.821605	0.897449	0.217537	0.799287	6981	76	CCDC34, ANKRD23, RPL39, E2F1, C4orf48, RECQL4, TMPRSS2, UBE2S, ANXA9, RHPN1, RBBP8NL, TMEM125, CDC45	Up-regulated
BLANCO_MELO_COVID19_BRONCHIAL_EPITHELIAL_CELLS_SARS_COV_2_INFECTION_up	0.240902	0.404255	0.284736	1.12855	2210	143	PARP12, ZP3, EPSTI1, PDZK1IP1, SPRY4, S100P, C1QTNF1, PRSS3, CCL20, IFITM1, TLCD1, CSF3, STC1, CXCL8, ZC3H12A, TUBA1C, GBP5, IFITM3, RHOF, CXCL6, PI3, HEPHL1, IL32, G0S2, MRGPRX3, SPRR2E, IL1B, INHBA, PLAUR, SERPINB1, MYEOV, STAT5A, CXCL5, SAA2, MMP1, KRT6B, HELZ2, SPRR1A, IRF7, CXCL1, C6orf223, PARP9, TUBB3, SPRR2D, CYP27B1, DUSP4, MAP3K8, SLC6A14, OAS1, HBEGF, TRIM47, SPRR2A, BPGM, VNN3, CXCL2,…	Up-regulated
BLANCO_MELO_COVID19_BRONCHIAL_EPITHELIAL_CELLS_SARS_COV_2_INFECTION_dn	0.000535619	0.0033272	-0.450563	-1.95042	0	54	PTPRZ1, METTL7A, NID1, PDK4, SPTLC3, MAF, MN1, DBP, TSC22D3, MYLK, PPARGC1A, RAB30, NANOS1, CENPA, PCDH7, EFCAB7, CDH10, MXRA5, IRF2BPL, GULP1, CXCL14, CREG2, PBX1	Down-regulated
BLANCO_MELO_COVID19_SARS_COV_2_INFECTION_A594_ACE2_EXPRESSING_CELLS_up	0.995476	0.998078	0.163709	0.700551	9901	483	RNF6, PARP12, KDM7A, PNPT1, LSMEM1, EPSTI1, ZNF830, CCNT1, SUGT1P1, HBP1, PROX1, CCNL1, NFKBIE, CD274, ZNFX1, TAF1D, TBC1D22B, RBM39, SLCO5A1, ZNF267, CXCL3, ATF4, RBAK, RHEBL1, SPOCK2, ICAM5, CLEC4A, SNORA8, MYSM1, CBWD6, IKZF5, ODC1, CCDC85A, BCL10, CCL20, IFITM1, C5orf51, STAT2, GRHL1, IDO1, USPL1, CCNT2, CDKN2AIP, CXCL8, ZC3H12A, UBXN7, IL22RA1, NT5C3A, AEBP2, IFITM3, DCP1A, FOXN2, PSMB9, HNR…	Up-regulated
BLANCO_MELO_COVID19_SARS_COV_2_INFECTION_A594_ACE2_EXPRESSING_CELLS_dn	0.224173	0.38629	0.304726	1.15326	1965	94	GPX2, SKP2, CENPM, TPD52L1, NDUFA2, PRDX1, SPP1, AHCY, PSAT1, ETFB, METTL7B, CDH17, TCTN3, KCNAB2, PRPS1, ANXA2, OLFML2A, DDC, CNFN, AMBP, SERPINH1, SLC25A10, DCDC1, INSL4, SMPDL3B, NRXN3, AKR1C4, CDK5, TRIM2	Up-regulated
BLANCO_MELO_COVID19_SARS_COV_2_INFECTION_A594_ACE2_EXPRESSING_CELLS_RUXOLITINIB_up	0.955833	0.97419	0.183863	0.78325	9478	427	PLK1, PMS2P3, RNF6, KDM7A, LSMEM1, SIM2, ZNF830, CCNT1, SUGT1P1, RLIM, CDKL3, HBP1, PROX1, CCNL1, RAB33B, NFKBIE, ESF1, TAF1D, TBC1D22B, RBM39, SLCO5A1, ZNF267, CXCL3, ATF4, RBAK, SPOCK2, ICAM5, CLEC4A, SNORA8, MYSM1, CBWD6, IKZF5, ODC1, CCDC85A, BCL10, CCL20, C5orf51, GRHL1, USPL1, CCNT2, CDKN2AIP, CXCL8, ZC3H12A, UBXN7, AEBP2, DCP1A, FOXN2, N4BP2L2-IT2, HNRNPU, JUN, ARL5B, MXD3, ZNF669, ZNF143,…	Up-regulated
BLANCO_MELO_COVID19_SARS_COV_2_INFECTION_A594_ACE2_EXPRESSING_CELLS_RUXOLITINIB_dn	0.125266	0.252353	0.34288	1.25452	1060	74	GPX2, ROMO1, TXN, NDUFA2, PRDX1, ALDH4A1, PHB, SPP1, PSMB3, AHCY, ETFB, ENPP1, KCNAB2, TM4SF20, PI3, CLDN2, PSMB10, DDC, COL11A1, SUSD2, RBKS, AMBP, SERPINH1	Up-regulated
BLANCO_MELO_COVID19_SARS_COV_2_INFECTION_A594_CELLS_up	0.302009	0.474203	-0.226212	-1.07024	420	84	RBMS3, ANK2, GREM1, TMEM156, ZMAT1, IL6, ARRDC4, HMGN2P46, PTX3, PTPRE, TSC22D3, ULBP1, RPS6KA2, CCL5, FUT1, SCG5	Down-regulated
BLANCO_MELO_COVID19_SARS_COV_2_INFECTION_A594_CELLS_dn	0.595624	0.741704	0.254517	0.929424	5035	73	GPX2, MCM10, DPEP1, KRT8, HPDL, HSPA1A, RECQL4, FEN1, RNF43, VIL1, NRGN, MXD3, EPHB3, DDC, TM4SF4	Up-regulated
BLANCO_MELO_COVID19_SARS_COV_2_INFECTION_CALU3_CELLS_up	0.0346535	0.0943287	-0.206321	-1.16721	6	322	HIVEP2, LAMA2, CNTN4, CSRNP1, TLR6, IKZF3, NLRP1, MT2A, ZFP36, MUC4, TNFAIP2, KLF9, PDZD2, LHB, KIT, IL6, ARRDC4, SAMD9, CD69, EGR2, EGR1, AKAP12, IFIT1, ZEB2, ANKRD1, UBASH3A, PHLDB2, HMGN2P46, BST2, PTX3, CYTH4, ZBP1, FOSB, APOL3, ULBP1, CH25H, TAGAP, MAST4, PDE4B, NR4A3, THBS1, IFI16, C1R, TNFSF14, PTGER2, TRANK1, CCL5, IFNL1, BMP2, FUT1, VCAM1, RND1, TRIM22, GIMAP2, SEMA7A, IGF2-AS, BBC3, DUS…	Down-regulated
BLANCO_MELO_COVID19_SARS_COV_2_INFECTION_CALU3_CELLS_dn	0.701595	0.819655	0.294846	0.831432	5014	19	C9orf116, CLDN2, ANXA10, MXD3, DDC, TM4SF4	Up-regulated
BLANCO_MELO_COVID19_SARS_COV_2_LOW_MOI_INFECTION_A594_ACE2_EXPRESSING_CELLS_up	0.09375	0.20413	-0.224489	-1.1631	68	153	PER3, CSRNP1, NBEAP1, ZFP36, CD200R1, SNORA63, EGR2, EGR1, ID1, PTX3, SNIP1, DBP, FOSB, IER2, FOS, FST, NR4A3, DLX2, CD300LB, FGA, C1R, PRG4, RRS1-AS1, CD83, LINS1, MAFF, BBC3, DUSP8, ZNF764, BHLHE41, KDM6B, WRAP53, NFKBID, FOXD3, SCARNA15	Down-regulated
BLANCO_MELO_COVID19_SARS_COV_2_POS_PATIENT_LUNG_TISSUE_up	0.252	0.418002	-0.207465	-1.07525	188	152	CA1, BASP1, HBA1, CDHR5, SAMD9, FDCSP, IFIT1, GAPT, CD53, P2RY13, CCDC60, TPSB2, ZBP1, CCL11, PLAC8, PADI2, CLC, CHI3L2, CACNA1A, TNFSF14, VTRNA1-1, APBB1IP, CPLX2, CDA, GCH1, C19orf84, RGS18, LCP1, HS3ST3A1, GTSF1, SAMD9L	Down-regulated
BLANCO_MELO_COVID19_SARS_COV_2_POS_PATIENT_LUNG_TISSUE_dn	0.151603	0.291734	0.294598	1.1853	1413	168	ZNF451, EXOSC7, FAM32A, PPP1R14B, KCTD20, MTURN, PRELID1, PCID2, SEPHS1, TUBA4A, ENTPD6, SMPD4, BCOR, HARS2, PYCR2, RNF31, STARD10, STC1, C19orf48, GMPPA, LCN10, ADAM15, KLHDC3, LRRC47, LDB1, DOCK6, MCM7, BAP1, SREK1, WDR74, KAT5, GATA2, TMEM255B, TCERG1, RALGDS, ZC3H7A, S100A13, ITPA, BLCAP, HMCES, METTL3, MYO1D, RASSF1, SFN, SGSM2, MAF1, CTCF, MPHOSPH10, MAFG, ZBTB44, SPSB3, XAB2, TCF25	Up-regulated
BLANCO_MELO_HUMAN_PARAINFLUENZA_VIRUS_3_INFECTION_A594_CELLS_up	0.334321	0.507713	0.263459	1.07149	3159	193	PARP12, PNPT1, EPSTI1, ITGA2, HYOU1, CD274, ZNFX1, TAP1, B2M, SLC15A3, NFE2L3, CD68, CDCP1, CEACAM1, IFITM1, STAT2, UBE2L6, STC1, IDO1, GBP5, NT5C3A, IFITM3, CXCL11, DTX3L, HERC5, CASP1, APOL1, ANXA10, SP140L, PARP14, PHF11, DDX60L, NCF2, TRIM21, IL1B, EIF2AK2, BATF2, PLAUR, IRF1, HSPA5, EREG, OASL, GBP4, CXCL10, HELZ2, LAP3, RTP4, IRF7, PHLDA1, RAET1E, PLA1A, PARP9, GBP1, TDRD7, IFNL3, DDX58, NO…	Up-regulated
BLANCO_MELO_HUMAN_PARAINFLUENZA_VIRUS_3_INFECTION_A594_CELLS_dn	0.863414	0.927304	0.202737	0.786059	7749	115	FOXD2, PLEKHH3, BCRP3, SNORA50C, ANXA9, AMH, VPS37D, EPHB3, CA9, KIF12, GPR35, CERS4, AMBP, VWA5B2, USH1C, CRB3, HSD17B14, CAMSAP3, C9orf152, LLGL2, TIGD3, ARHGAP33, CLDN3, CHTF18, ROM1, C6orf226, ADM5, ABCC6, IFITM10, GAL3ST1, FGFR3, VMO1, ZDHHC8P1, ZNF219, MYO1A, C21orf58, PRODH2, HLA-DMA, NPW, NECAB2, WFDC21P, CDC42BPG	Up-regulated
BLANCO_MELO_INFLUENZA_A_INFECTION_A594_CELLS_up	0.118758	0.242573	0.404783	1.30683	917	36	C1D, ZFAND2A, NME1, IDI1, MRPL42, STC1, CXCL8, CISD2, SRP9, MTFR1, PLAUR, CXCL5, HSPA5, EREG	Up-regulated
BLANCO_MELO_INFLUENZA_A_INFECTION_A594_CELLS_dn	0.247361	0.412388	0.2938	1.13266	2202	110	RPL8, CMTM8, TYSND1, RPL39, SNORD104, HNRNPA0, ENGASE, LSR, MRM1, RPS10, NDUFA1, MESP1, RNF43, MXD3, ELK1, ZFYVE27, NOTCH3, KIF12, FKBP2, PKDCC, ZNF428, SNX12, ZNF696, HDAC11, HSD17B14, SPATA2L, MPLKIP, SLC16A13, MAFG, FBXO44, KIAA0895L, ARHGAP33, HOXC9, BAX, GIGYF1	Up-regulated
BLANCO_MELO_MERS_COV_INFECTION_MCR5_CELLS_up	0.428125	0.59892	-0.182521	-1.00794	136	264	IL1RL1, NCF1, CSRNP1, NEB, PYGM, ENDOU, SCN1A, PDZD2, CLIC2, BAAT, TINCR, USP49, FAM71F1, EVC2, C1orf162, ANKRD1, TEC, VHLL, OTUD3, DDN, CPN2, NOXRED1, ZCCHC2, ALDH8A1, ZNF462, SLC5A11, SLC6A13, SYT16, FOS, PSMD6-AS2, CFAP53, OIT3, SSUH2, TNXB, DYRK2, ZNF460, RNF144B, C9orf24, C8G, CDC14A, MAMDC2, DUSP8, AXDND1, CCDC62, BHLHE41, NIM1K, ADGRF3, SPDYA, SLC25A34, ZBTB37, CCDC17, MUC20, ACVR1C, SLC1A…	Down-regulated
BLANCO_MELO_MERS_COV_INFECTION_MCR5_CELLS_dn	0.296342	0.468661	-0.290047	-1.09748	720	31	ADH1B, PTGDS, SCN7A, SERPINA3	Down-regulated
BLANCO_MELO_RESPIRATORY_SYNCYTIAL_VIRUS_INFECTION_A594_CELLS_up	0.362319	0.537854	-0.183637	-1.02257	99	280	DCLK1, FSTL1, HSPB8, DSEL, ID4, NID2, TMCC3, IL6, OSMR, F3, KRT17, POU2F2, SAMD9, CORO2B, CLMP, GPAT3, EGR1, IFIT1, ADAM19, CPM, BST2, PTX3, COL15A1, CRTAC1, PTPRE, APOL3, CH25H, CHST11, IL20RB, ANPEP, TNC, IFI16, FBXO32, GFPT2, UBA7, TNFSF14, ST3GAL1, SORCS2, TRANK1, IFNL1, ETS1, BMP2, TRIM22, HRH1, EMP1, LCP1, MAFF, HERC6, PLOD2, STX11, SAMD9L, CSF1, ITGA5, NIPAL1, XDH, TNFSF10, MCTP1, C3, IL7R…	Down-regulated
BLANCO_MELO_RESPIRATORY_SYNCYTIAL_VIRUS_INFECTION_A594_CELLS_dn	0.933086	0.961952	0.186482	0.71864	8310	109	CCDC34, NEIL1, CACNG4, IL17RB, KSR2, CDH17, DOK4, ANXA9, TM4SF20, CLDN2, RDM1, EPHB3, KIF12, SLC3A1, DDC, CIDEC, AMBP, VWA5B2, USH1C, PRR36, INSL4, C9orf152, SLC52A1, CDCA7L, LLGL2, CLDN3, CCDC74B	Up-regulated
BLUM_RESPONSE_TO_SALIRASIB_up	0.000208377	0.00158131	0.397234	1.63986	1	231	EIF2S2, BUD31, RALA, HSPA9, EIF4EBP1, TIMM9, IFRD1, DDX10, DUS4L, MTHFD2, XIAP, EIF3H, HYOU1, VPS28, CDK7, YKT6, PMS2, OGT, KPNA4, TCEA1, PFDN2, TIMM44, ENTPD6, RPL12, CXCL3, ATF4, ASNS, NPC1, RRN3, PSAT1, DCTD, DAP3, SSR3, RNF13, EIF5, CANX, CNIH1, UBE2H, HSPA13, COG5, RSL24D1, DNAJA3, GFPT1, ANXA7, SEPHS2, CSNK1A1, ZNF593, NSMAF, YIF1A, RAD23A, RAB22A, SERP1, HMGCL, TRIB3, SUPV3L1, ZPR1, TSG101…	Up-regulated
BLUM_RESPONSE_TO_SALIRASIB_dn	0.000101823	0.00109167	0.567092	2.38865	0	329	TFDP1, CKS2, TPX2, PLK1, CSE1L, MIPEP, PTTG1, EZH2, CDKN3, KPNA2, MKI67, CDC6, SKP2, BUB1, CHAF1B, STIL, AURKA, CDK1, CCNA2, RAD51AP1, USP1, MYCBP, HSPA14, TTK, HMGB1, UBE2C, TRIP13, BRCA1, LSM5, RPA3, MTHFD1, TOP2A, B4GALT5, RFC2, SRSF7, GINS2, PTTG3P, KIF23, DUT, RFC4, CDK2, CBX3, PRDX3, POLA1, ZNF107, KIF20B, TMPO, DEK, SIM2, PLK4, CCNB2, ACLY, CDC25B, CENPF, DHFR, CHEK1, SRSF2, SFPQ, PCNA, PR…	Up-regulated
BOCHKIS_FOXA2_TARGETS_up	0.000807673	0.00456162	0.333197	1.41711	7	409	MLXIPL, RPL21, PA2G4, GNL3, PON2, SORD, RSC1A1, PES1, BRCA1, TIAL1, APOC1, MAL2, EIF4A2, PTK2, TIMM9, CEBPZ, INSIG1, HBS1L, KIF9, LRPPRC, CD47, SORT1, KCTD20, NDUFA2, DHCR7, TSEN15, PHF20, HACD3, PRDX1, INSIG2, HM13, PRKDC, BCDIN3D, AFMID, ZC3H8, PFDN2, PRKAR2A, TERF2, ATF4, TFAP4, AHCY, ATG12, TXNL4B, EBAG9, CBLL1, SLC31A1, CHUK, NUP43, PPARG, ARHGAP12, HMGB2, CLEC4A, BANF1, CYP2A6, AP3S1, FBP1,…	Up-regulated
BOGNI_TREATMENT_RELATED_MYELOID_LEUKEMIA_up	0.324335	0.496395	-0.287464	-1.07961	804	30	EFEMP1, GABRB1, SGPL1, PAX5, MAP2K1, SLC10A1, EFNA2, RFNG	Down-regulated
BOGNI_TREATMENT_RELATED_MYELOID_LEUKEMIA_dn	0.241122	0.404476	0.370546	1.17462	1839	33	CDK8, MYB, PREP, CCND1, CD2AP, FBXO21, SRSF6, COA1, CCNG1, MRPL28, TBC1D5, ACOX1, RGL2, TNFRSF10B, VPS52, NKTR, FSCN2	Up-regulated
BOHN_PRIMARY_IMMUNODEFICIENCY_SYNDROM_up	0.000252175	0.00184644	0.547624	1.8376	1	45	MKI67, UBE2C, RPS5, TOP2A, MLEC, NMD3, TXN, RPL14, RPSA, HAX1, DLGAP5, ATF4, CANX, SSR2, HILPDA, OAT, IL32, SRSF3, SMC2, NUSAP1, BLM, TAGLN2, ASPM	Up-regulated
BOHN_PRIMARY_IMMUNODEFICIENCY_SYNDROM_dn	0.311794	0.48437	-0.271889	-1.08217	689	38	F13A1, CHFR, CHI3L2, DPYD, DYRK2, TNFSF10, TLR7, SUSD6, DUSP1, MOXD1, SNRPN, LST1, ATP6V0D1, VCL, TUBB6	Down-regulated
BONCI_TARGETS_OF_MIR15A_AND_MIR16_1_up	0.555898	0.710186	-0.202981	-0.965712	720	88	FGF7, RSPO3, WSB1, WNT2B, HAS2, SMAD7, ADAMTS3, KCNQ5	Down-regulated
BONOME_OVARIAN_CANCER_POOR_SURVIVAL_up	0.262639	0.430836	-0.297139	-1.12432	638	31	FAT4, EFEMP1, TSPAN7, RUNX1T1, CCPG1, PSD3, GULP1, REV3L, THSD7A, KCNAB1	Down-regulated
BONOME_OVARIAN_CANCER_POOR_SURVIVAL_dn	0.0195859	0.0595468	0.564998	1.59323	139	19	EHMT2, LPAR2, BOP1, HNRNPU, COLGALT1, SRRT, MTAP	Up-regulated
BONOME_OVARIAN_CANCER_SURVIVAL_OPTIMAL_DEBULKING_up	0.146209	0.283967	0.284792	1.17528	1401	230	NFS1, CCT5, DNMBP, SIM2, TM2D3, GH2, URI1, GGA2, SPTLC2, CHD1L, CKLF, CLIC1, NDUFB2, COX6CP1, NDUFS6, MCTS1, EIF2S1, C4orf19, TM4SF1, SCAF4, CYB5R1, PLXNB1, SLC19A2, NDUFA1, UBB, SPATA2, TSPO, DACH1, ANXA9, CMTM6, PHACTR2, VPS41, NDUFB3, RBX1, ZNF529, ZHX3, RAB11A, YIPF2, SEC61B, LY6E, NSD1, PCTP, CDK19, NDRG3, SLC3A1, ATP6V1H, COQ2, ZMYM2, DNPH1, SPR	Up-regulated
BONOME_OVARIAN_CANCER_SURVIVAL_SUBOPTIMAL_DEBULKING_up	0.862846	0.927304	0.202092	0.864734	8580	481	TFAM, SEC23IP, DKC1, DIMT1, CDK2, RAD54L, SYK, ERLIN2, EHMT2, PDCD5, GIPC2, WBP4, CDC40, STK39, ZFYVE16, LPAR2, PIK3R1, BOP1, DCAF15, UBE2B, DDX52, DHX9, RAB2A, SMAGP, TM2D1, ESPL1, AP1M2, MYBL2, HMGA1, IBTK, PIK3R2, ATP6V1C1, HNRNPH1, CGREF1, HMGCR, PPP3CB, KCNQ1, RAPGEF1, SNX3, EOGT, STAT2, REEP5, TAX1BP1, BAIAP2, RB1, YIPF6, RAB6A, SRSF11, OXLD1, VAC14, HMGB3, STK4, PHACTR2, DHX29, AMH, RHOT1,…	Up-regulated
BOQUEST_STEM_CELL_up	0.00295858	0.0128718	-0.573287	-3.15248	0	254	ABCA8, FGF7, ADH1B, DCLK1, OGN, GSN, SLIT3, SVEP1, LAMA2, RERGL, HSPB8, BASP1, GRIA3, ABI3BP, PTGDS, DPT, EFEMP1, ROR1, CFH, LPAR1, PTGIS, COL14A1, NPY1R, C7, NOVA1, SERPINF1, PDGFRA, ANK2, FBN1, EMP3, CXCL12, MFAP4, BICC1, GLT8D2, DZIP1, ADH1C, MYH11, SETBP1, PEG10, MMP2, COLEC12, ANG, F3, CTSK, CES1, SERPINA3, LIF, PLN, IGF1, CHRDL1, AEBP1, HTRA1, MFAP2, FBLN5, SLIT2, PTX3, PLA2G2A, OLFML3, MFA…	Down-regulated
BOQUEST_STEM_CELL_dn	0.167689	0.31326	-0.205896	-1.10822	81	208	PALMD, RCAN1, ACKR1, JAM2, GFOD1, ENDOU, EMCN, TBC1D9, LPCAT4, SCUBE2, IL18R1, MPZL2, ENPP4, CYTH1, S1PR1, CLIC5, BST2, PTPRM, ANGPT2, ADGRL4, PTPRE, TSPAN7, BAALC, HLA-DRB1, MAST4, GNG11, RAPGEF4, SWAP70, RPS6KA2, SSH1, LAPTM5, MYCT1, SOCS2, RND1, RAMP3, CLDN5, PLVAP, ERG, SOX17, STX11, CAPN11, TEK, ZNF385D, SEC14L1, CD93, PECAM1, MCTP1, ARHGEF15, NR5A2, BCAR3, FLI1, KDR, HHEX, HLA-DQB1, PGS1, R…	Down-regulated
BOQUEST_STEM_CELL_CULTURED_VS_FRESH_up	0.0103093	0.0348924	-0.300006	-1.73812	0	409	ADH1B, DCLK1, GSN, SCRG1, METTL7A, PER3, ABI3BP, PTGDS, ANGPTL2, FRZB, CFH, ADGRG2, PAPSS2, PRKAR2B, COL14A1, PDK4, STEAP4, NPY1R, LTBP4, NOVA1, ADAMTSL3, SERPINF1, CPE, ANK2, MATN2, GREM1, HBA1, ZFP36, CPQ, MFAP4, GEM, KLF9, JUND, ADH1C, CLIC2, AKAP13, IL6R, ESR1, COLEC12, ANG, CTSK, CES1, TIGAR, SERPINA3, MAF, KIF13B, ACACB, EGR1, NELL2, TPM4, IGF1, CHRDL1, ANO1, RGS4, AEBP1, ID1, GGT5, C1QTNF3…	Down-regulated
BOQUEST_STEM_CELL_CULTURED_VS_FRESH_dn	0.000402901	0.00272328	-0.700972	-2.6326	0	30	ADH1B, OGN, DPT, C7, ITIH5, SPARCL1, IGF1, FOSB, CPVL, MYOC, NTRK2, CD14, FABP4, OMD, CHL1, C3, PDGFRL, CXCL14, TPPP3	Down-regulated
BORCZUK_MALIGNANT_MESOTHELIOMA_up	0.000102627	0.00109167	0.576922	2.41294	0	291	TMEM97, TFDP1, CKS2, TPX2, SEC23IP, SERBP1, STIP1, KPNA2, GLO1, SMARCC1, DKC1, PTGES3, PSMA2, SCCPDH, VDAC1, UBE2C, CCT5, HSP90AB1, TOP2A, LAMTOR5, CCT2, SSBP1, RFC2, LYPLA1, RALA, FBL, CKS1B, GINS1, RFC4, CBX3, PMS2P1, PYCR1, UBE2A, TERF1, KRIT1, YWHAZ, BPHL, IARS2, CCNB1, VRK2, HACD2, DBI, PCNA, CCNF, EIF3H, SEC61G, RAN, KDM1A, BET1, RAC1, SLC25A3, MAPRE1, MSMO1, METTL18, PAPOLA, SMAD5, PPP4C, …	Up-regulated
BORCZUK_MALIGNANT_MESOTHELIOMA_dn	0.000849618	0.00472318	-0.368183	-1.79843	0	102	CPA3, FRZB, NCF1, C7, AMY1A, RAPGEF3, FCMR, CAPN3, MS4A1, HAS2, FGF12, PNOC, IGKV1OR1-1, PLA2G2A, MEG3, FXYD1, SEMA3B, MAST4, RNF10, LMOD1, OVOL3, AMPD1, RBMY2AP	Down-regulated
BORLAK_LIVER_CANCER_EGF_up	0.160207	0.30319	0.356087	1.23214	1297	53	KRT18, SCD, MKI67, CDK1, CCNB1, S100A11, KRT8, SPP1, ETS2, CCND1, VIL1, ANXA2, BTG3, BEX2	Up-regulated
BOSCO_ALLERGEN_INDUCED_TH2_ASSOCIATED_MODULE_up	0.724119	0.836207	0.222182	0.879712	6637	142	TPP2, CERS6, RRS1, SLC12A2, NDFIP2, CDH1, DEPDC7, MKRN1, RASL11A, YEATS4, IL17RB, RPL5, FOXP3, NABP1, GNPDA1, RRAGD, CEACAM1, ENO1, SNTB1, IMMT, OR5AN1, IL1B, CISH, SYTL3, DPP4, PHF20L1, KPNA6, SLCO3A1, CASP3, LRFN2, SOCS1, FCER2, DCDC1	Up-regulated
BOSCO_EPITHELIAL_DIFFERENTIATION_MODULE_up	0.507454	0.670687	0.270944	0.977036	4254	67	KRT18, PARD6B, SPNS2, TSPAN6, LMO7, RDH10, TM4SF1, TMPRSS2, ANXA9, CEACAM6, TACSTD2, GPRC5A, LCN2, CEACAM5, TRIM16	Up-regulated
BOSCO_INTERFERON_INDUCED_ANTIVIRAL_MODULE_up	0.0971023	0.209135	0.354147	1.29324	820	73	CDK1, PARP12, PNPT1, EPSTI1, LRRC37A11P, CD274, NUB1, STAT2, TMEM176A, IFITM3, HERC5, APOL1, SDC3, EIF2AK2, CMTR1, GBP7, OASL, ITGA4, GBP4, TTYH2, IRF7, MIA3, IFI6, TDRD7, NCOA7	Up-regulated
BOSCO_TH1_CYTOTOXIC_MODULE_up	0.0516304	0.130293	-0.252503	-1.2425	56	108	STAB1, F13A1, GIMAP8, GPR171, SLAMF1, P2RX5, ADAM3A, ADAM19, LILRB5, IRF4, CD28, APOL3, CH25H, PLEKHO1, STAT4, GIMAP7, ENPP2, CMKLR1, PTGER2, ABCB1, CD163L1, FBXO39, HERC6	Down-regulated
BOUDOUKHA_BOUND_BY_IGF2BP2_up	0.000113443	0.00109167	0.478746	1.82669	0	101	LSM5, GID8, ROMO1, VPS29, LBR, XPO1, RPS16, WDR5, INSIG2, ATP6V0C, RPL36A, VBP1, COX8A, DNAJC30, RPS10, SRSF10, NDUFA1, RPS15, CISD1, RPL22, CCND1, RPS4X, S100A6, AP3M1, TSPAN5, HSPA1B, RPLP0, VPS26A, SEC61B, TMEM147, CMC4, GNG12, UNC50, FAU, PTPN12, NDRG1, CCNG1, DYNLL1, DESI1, ISCA2, TIMM8A, PCBP1	Up-regulated
BOWIE_RESPONSE_TO_EXTRACELLULAR_MATRIX_up	0.2183	0.379326	0.441602	1.21296	1545	17	IFITM1, PSMB9, PSMB10, IRF1, ISG15, IRF7, IFI6, STAT1, OAS1, MX1, IFIT3	Up-regulated
BOWIE_RESPONSE_TO_TAMOXIFEN_up	0.50493	0.668639	0.349246	0.971446	3584	18	IFITM1, IRF1, ISG15, IRF7, IFI6, IFI27, STAT1, OAS1, MX1, IFIT3	Up-regulated
BOYAULT_LIVER_CANCER_SUBCLASS_G1_up	0.0166161	0.051924	0.376622	1.45138	147	109	SMARCC1, TMEM63A, F11R, LBR, CRNKL1, SEPHS1, KLHL23, HNRNPA0, CACNA1D, EPHB4, MAPK13, SOX13, RPL17, PIAS4, TTLL4, UBXN7, STT3A, CCZ1, TPR, RPLP0, MMP11, TIA1, ADGRG1, B4GALT3, ZNF143, CDK19, MYO5C, PLPP2, ZNF468, DNAJC9, SREK1IP1, NAP1L1, RPS19, CTNND2, SOX9, SMG7, NCOA3, NRXN3, RABIF, LAD1, LLGL2, FAM168B, RPA1, ABHD3	Up-regulated
BOYAULT_LIVER_CANCER_SUBCLASS_G1_dn	0.335345	0.508932	0.335665	1.09401	2611	38	CDC14B, MBNL2, SDHB, SLC16A1, BTN3A2, VKORC1, ZNF593, CTBS, GCLC, AK2, CTSB, BLCAP, LAP3, GBE1, TRIM2, COQ9, HSD17B10	Up-regulated
BOYAULT_LIVER_CANCER_SUBCLASS_G12_up	0.0725395	0.168457	0.419693	1.37603	568	39	HSPA14, SLC29A1, SMYD3, MFF, TMEM183A, SYNJ2, ARF1, MKKS, GORASP2, TTC13, SUN1, LPGAT1, SCAMP3, TMEM106B, TUG1, TOR3A, TMEM260, RBM34, RCOR3, RAP2A, FGFR4	Up-regulated
BOYAULT_LIVER_CANCER_SUBCLASS_G12_dn	0.932904	0.961952	0.231332	0.61457	6520	15	ACSL5, RUNDC3B, TSKU, HLF, PIK3C2G, QDPR, GSTA3, FAM13A, ADI1	Up-regulated
BOYAULT_LIVER_CANCER_SUBCLASS_G123_up	0.00012566	0.00109167	0.658757	2.2209	0	46	ATAD2, KPNA2, PON2, CACYBP, GINS1, RFC4, SNRPE, TMPO, SAC3D1, CCNB2, ACLY, KIF20A, SNRPB, PRKDC, DUSP12, HAT1, CCT3, CPD, PRKCI, FABP5, VIL1, LARP4B, CBX1, BARD1, ENAH, SMC4, CAPRIN1, SUCO, SNRPD1, TUFT1, MAP4K3, ISG20L2	Up-regulated
BOYAULT_LIVER_CANCER_SUBCLASS_G123_dn	0.947942	0.96964	0.192488	0.660602	7647	50	GOT2, MTHFD1, GRHPR, SLC27A5, MSRA, CBR4, RCL1, ACSM5, MLYCD, ECM2, ST3GAL6, GCDH, NR1I2, SLC28A1, EXPH5, PCK2, PRODH2, SLC25A15, GABARAPL3	Up-regulated
BOYAULT_LIVER_CANCER_SUBCLASS_G2_up	0.42651	0.598103	-0.276055	-1.01465	1122	27	FHOD3, SDF2L1, SAP130, ENPP2, ARHGEF40, ITGA5, MCTP1	Down-regulated
BOYAULT_LIVER_CANCER_SUBCLASS_G23_up	0.000494376	0.00314311	0.510585	1.7586	3	51	MKI67, USP1, TFRC, DBF4, SLBP, DLGAP5, UPF3B, NPC1, HLTF, SLC39A6, ARPC1A, MCM3, RRAGD, CCNE2, FEN1, UBE2S, ARFGEF2, RRM1, SUZ12, SLC38A1, DDOST, SMC2, NDUFA4L2, TWF1, MEMO1, SFN, NEK2, TYMS	Up-regulated
BOYAULT_LIVER_CANCER_SUBCLASS_G3_up	0.000106372	0.00109167	0.640504	2.59394	0	183	ATIC, HJURP, FNBP1L, EZH2, RPL8, DKC1, NDC1, CDC6, GNL3, BUB1, MELK, PTGES3, CCNA2, RAD51AP1, TTK, TRIP13, CEP55, CCT5, SLC7A1, GTF3C3, SNX7, PIGF, CCT2, CENPM, CYB5B, SNRPD2, CBX3, MPV17, BRD7, UBE2V2, PPP1CC, TXN, UTP18, XPO1, TAF2, MRTO4, PWP1, EIF3H, STMN1, SEC61G, PUS7, TIPIN, BOP1, CCT4, NOL11, NCAPG, MAPRE1, MED1, PAPOLA, PSMD11, UCK2, SUB1, PHB, EBNA1BP2, HNRNPR, SRM, ACTL6A, CKLF, CLIC1,…	Up-regulated
BOYAULT_LIVER_CANCER_SUBCLASS_G3_dn	0.0692865	0.162967	-0.313654	-1.33127	133	50	CFH, SERPINF1, TF, IFIT1, SARDH, COX7A1, CPN2, TNXA, SELENBP1, GPLD1, ASGR2, ZCCHC24	Down-regulated
BOYAULT_LIVER_CANCER_SUBCLASS_G5_dn	0.42691	0.598193	-0.273502	-1.01218	1100	28	EMP3, ARHGDIB, IFI16, LAPTM5, CELF2, ARL4C, PTGER4, HLA-DPB1, HMGN3, DAB2, HLA-DPA1, IL10RA, SIRPAP1, WIPF1	Down-regulated
BOYAULT_LIVER_CANCER_SUBCLASS_G56_dn	0.955989	0.97419	0.21518	0.580802	6711	16	HPS5, AGPAT2, TRIB1, VNN3, QSOX1	Up-regulated
BOYAULT_LIVER_CANCER_SUBCLASS_G6_up	0.0125634	0.0411891	0.434157	1.54135	103	61	GGH, CBR1, MLEC, TBCA, PREB, LGALS8, C1orf112, CTNNBL1, FHIT, UGGT1, NEK3, AP3S1, MME, HSDL2, RNF43, TCEAL1, TIMM17A, SLC5A6, CRYZ, ACTN2, LEF1, EFR3A	Up-regulated
BOYAULT_LIVER_CANCER_SUBCLASS_G6_dn	0.429859	0.600134	0.369014	1.02643	3051	18	SDC4, CDH1, LSR, CMTM6, INPP1, RRBP1, GATA6, TRIM15	Up-regulated
BOYLAN_MULTIPLE_MYELOMA_C_up	0.0262629	0.0750883	0.440302	1.48441	208	46	SKP2, MARCKSL1, GAS5, RLIM, CSTF1, HEATR1, MCM3, LGR5, FAM110A, CAD, RBKS, DPP4, NASP, PTGR1, FKBP3, TYMS, LRIG1, CPSF6, ZFPM1, SPIB	Up-regulated
BOYLAN_MULTIPLE_MYELOMA_C_dn	0.387998	0.562506	0.299171	1.05234	3193	58	CERS6, LAPTM4B, SPP1, EID2, FZD6, FAM234A, RNF43, JUN, TNFRSF21, ENAH, CYSTM1, SERPINB1, NFIC, MAGEH1, RGS1, G6PC3, TSC22D1, KLF6, RAB20, CTSV, IRS2, AIG1, VOPP1, TMEM191C, SOAT1	Up-regulated
BOYLAN_MULTIPLE_MYELOMA_C_CLUSTER_up	0.179731	0.329472	0.386794	1.23336	1377	34	SKP2, MARCKSL1, CSTF1, CAD, UHRF1, DPP4, GAS2L3, PTGR1, TYMS, POMT1, RAG1, ZFPM1, FOXM1, NFYA, EPS8	Up-regulated
BOYLAN_MULTIPLE_MYELOMA_C_CLUSTER_dn	0.625446	0.76142	0.28523	0.892997	4733	31	SPP1, EID2, SARAF, SERPINB1, ZBTB20, RGS1, KLF6, RAB20, CTSV, IRS2, AIG1, TRIM34, SOAT1, SLC7A11, CCND2, SAT1	Up-regulated
BOYLAN_MULTIPLE_MYELOMA_C_D_up	0.00353123	0.0147231	0.391768	1.53366	31	127	NOLC1, PVT1, TFRC, MTHFD1, TRA2A, ATAD1, BCL11A, PTK2, RAD54L, SLC29A1, TARBP1, FUBP1, ESCO2, ZFAS1, DDX19B, FARSB, XYLB, SIVA1, TAF1D, NCL, FANCA, SUPT16H, SMPD4, IDI1, SNRPF, POFUT1, AGPAT5, NUDT21, SLC16A1, LINGO3, ZNF593, STXBP1, INCENP	Up-regulated
BOYLAN_MULTIPLE_MYELOMA_C_D_dn	0.00330033	0.0139755	-0.275023	-1.52151	0	268	TNFRSF17, RMDN2, F13A1, BASP1, ABI3BP, STEAP4, HBA2, GPR174, GIMAP8, CPE, GVINP1, MS4A1, MDFIC, RGS13, B3GALNT1, EAF2, KIT, FOSL2, IL18R1, SERPINA3, MAF, CORO2B, CTSG, LILRB5, ID2, EOMES, P2RY14, LAX1, CP, ITGB5, PTPRE, RHOB, ZBP1, TIAM1, CD28, FOS, WIPI1, CCR2, STAT4, S100A9, AMY2A, LRP12, SLFN12, CDH2, MCEMP1, INPP4B, IFI16, PRLR, GPR183, SEC24D, CCL5, VCAM1, RGS18, HDC, FAM219A, PAFAH2, CHST1,…	Down-regulated
BOYLAN_MULTIPLE_MYELOMA_D_up	0.0781831	0.177805	0.35101	1.30742	672	84	GGCT, GART, MYC, GSTO1, TIMM9, ITGA6, IRF2BP2, OBSCN, FAM221A, SLC15A3, CHD4, EIF5, ASPH, RRM2B, CCND1, FABP5, TLN2, CLYBL, SUSD3, SH3BGRL2, ISL1	Up-regulated
BOYLAN_MULTIPLE_MYELOMA_D_dn	0.303588	0.475797	0.298878	1.10221	2588	78	KRT18, STK3, UPB1, NFKBIE, SH3BP1, ANXA4, KSR1, MTCH1, ARHGAP21, S100A6, CTDSPL, ATP11A, CTNNA1, ABHD8, DDX3Y, CASP1, TIFAB, HSD17B11, PIWIL4, PRKRA, S100A13, TMEM141	Up-regulated
BOYLAN_MULTIPLE_MYELOMA_D_CLUSTER_up	0.23341	0.395723	0.390392	1.18497	1719	27	GSTO1, ACTR3B, OBSCN, EIF5, CCND1, CLYBL, SH3BGRL2, ISL1, N6AMT1, UCHL1, STC2	Up-regulated
BOYLAN_MULTIPLE_MYELOMA_D_CLUSTER_dn	0.474834	0.640206	0.310834	0.996595	3650	35	STK3, NFKBIE, SH3BP1, ANO6, MTCH1, ARHGAP21, CTDSPL, CTNNA1, PRKRA, CEP250, ARFGAP3, PHKA1	Up-regulated
BOYLAN_MULTIPLE_MYELOMA_PCA1_up	0.000963391	0.00522935	-0.349417	-1.74033	0	116	TNFRSF17, IGHA2, RMDN2, BASP1, IGKV2D-28, ABI3BP, HBA2, GIMAP8, CPE, B3GALNT1, IL18R1, SERPINA3, CTSG, JCHAIN, CP, ZBP1, WIPI1, CCR2, STAT4, S100A9, AMY2A, SLFN12, IFI16, PRLR, CCL5, HDC, CHST1, LPAR4, CACNA1S, IL2RB, FADS3, XDH, C3	Down-regulated
BOYLAN_MULTIPLE_MYELOMA_PCA3_up	0.168711	0.314914	0.324806	1.20365	1443	81	CERS6, LGALSL, LAPTM4B, MTHFD2L, OBSCN, EID2, CDK6, FAM221A, ASNS, RRAGD, CCND1, RNF43, FABP5, JUN, TMEM38B, TLN2, ARMCX5-GPRASP2, ENAH, ISL1, SERPINB1, TSPAN4, ALCAM	Up-regulated
BOYLAN_MULTIPLE_MYELOMA_PCA3_dn	0.665951	0.793932	0.246043	0.887239	5583	67	SKP2, STK3, UPB1, ZCCHC14, SH3BP1, ANXA4, ARHGAP21, CEACAM1, DNM1L, ATP11A, CTNNA1, ABHD8, DDX3Y, CASP1, TIFAB	Up-regulated
BRACHAT_RESPONSE_TO_CAMPTOTHECIN_up	0.809823	0.889645	-0.22347	-0.78283	2192	23	TMEM185A, CD53, C1R, TP53INP1, ZFP36L1, TXNIP	Down-regulated
BRACHAT_RESPONSE_TO_CAMPTOTHECIN_dn	0.000254777	0.00185854	0.566241	1.86488	1	40	CDK1, PPIA, SSB, PDK3, ANXA4, AK4, PSAT1, EMC2, ALDOA, NDUFV3, BAD, TAX1BP1, ENO1, IFITM3, RCN1, OSTF1, HMGCS1, TUBB, BAK1, STAT5A, GAPDH, FKBP3, GPI	Up-regulated
BRACHAT_RESPONSE_TO_CISPLATIN_up	0.381832	0.556546	-0.297119	-1.04083	1033	23	SERPINA3, TMEM185A, CD53, VMP1, TP53INP1, DHRS3, TXNIP	Down-regulated
BRACHAT_RESPONSE_TO_METHOTREXATE_up	0.770673	0.866474	-0.235035	-0.81064	2096	22	TMEM185A, CD53, VMP1, TP53INP1, ZFP36L1, TXNIP	Down-regulated
BRACHAT_RESPONSE_TO_METHOTREXATE_dn	0.00477685	0.0189256	0.578623	1.71442	34	24	PPIA, PDK3, ANXA4, AK4, ALDOA, NDUFV3, ENO1, IFITM3, OSTF1, HMGCS1, STAT5A, GAPDH, FKBP3, GPI	Up-regulated
BREDEMEYER_RAG_SIGNALING_NOT_VIA_ATM_up	0.709833	0.824869	0.242095	0.85949	5875	61	SEC23IP, ADAT2, FAM32A, LSM12, THOC1, CCND1, PRELID2, PI4KB, HGSNAT	Up-regulated
BREDEMEYER_RAG_SIGNALING_NOT_VIA_ATM_dn	0.58384	0.732266	0.265601	0.931763	4797	57	SLC11A2, SLPI, RFC3, EIF2S1, SNX10, ASPH, NAGLU, SMURF1, IMP4, AVL9, RPAP2, PIGY, KBTBD2, ZW10, LANCL1, CACNA1H, MSH5, OSR2	Up-regulated
BREDEMEYER_RAG_SIGNALING_VIA_ATM_NOT_VIA_NFKB_up	0.294418	0.466829	0.327484	1.1197	2367	49	BCL11A, HOOK1, SIVA1, ANXA4, LDLRAD3, FGGY, CYP2J2, MSRB2, JUN, ZNF182, TCAIM, PRRG4, THBD, AKR1E2	Up-regulated
BREDEMEYER_RAG_SIGNALING_VIA_ATM_NOT_VIA_NFKB_dn	0.517976	0.681796	0.29624	0.971273	4062	39	LSM8, TMEM254, C1GALT1, ACAD10, CDK5RAP1, TNK2, PCTP, TGFBRAP1, KIF5B, POMT1, PHKA1, ESCO1	Up-regulated
BREUHAHN_GROWTH_FACTOR_SIGNALING_IN_LIVER_CANCER_up	0.609585	0.750246	0.337552	0.896762	4260	15	MET, AXIN2, CTNNB1, EGFR	Up-regulated
BRIDEAU_IMPRINTED_GENES_up	0.714982	0.828565	-0.200084	-0.893584	1173	64	HTR2A, SLC22A2, CNTN3, KLRB1, SCIN, PEG10, MEG3, PEG3, ZRSR2, DCN, MKRN3, PPP1R9A, COMMD1, CMAHP, PON3, SNRPN, PLAGL1, RASGRF1, NDN	Down-regulated
BROCKE_APOPTOSIS_REVERSED_BY_IL6_up	0.171296	0.318319	-0.219333	-1.12473	147	139	SGK1, CD180, PDGFRA, ZFP36, MT1X, LPCAT4, MT1H, POU2F2, TPM4, ID2, ID1, CHST15, VWA5A, IRF4, MCL1, IER2, WIPI1, STAT3, IL6ST, RAPGEF4, EVI2A, MYLK, ID3, AMPD1	Down-regulated
BROWN_MYELOID_CELL_DEVELOPMENT_up	0.609557	0.750246	0.23468	0.94032	5663	160	RPL13, CLDN1, DGAT2, SLC30A6, S100A11, ANXA4, AOAH, SLC15A3, NPC1, RPE, CD68, CLEC4A, CPNE3, CPD, CEACAM1, RPS17, S100A6, TYROBP, CCDC125, HEXB, ATP6V1B2, SLC6A6, TIFAB, PGD, CAP1, PLGRKT, DSTN, LCN2, IL1B, GSTM1, PLAUR, NQO1, BCL2A1, EREG, ALCAM	Up-regulated
BROWN_MYELOID_CELL_DEVELOPMENT_dn	0.000111198	0.00109167	0.523312	2.03903	0	123	TMEM97, HSPH1, CCT6A, SLC7A5, SMARCC1, SPNS2, NOLC1, BZW2, C1QBP, UTP4, GART, SRSF7, NOP56, HSPD1, NOP16, NSUN2, WDR43, ZFAS1, SLC22A3, NPM1, APEX1, NME1, NCL, DIS3, RIF1, NT5C3B, PAXBP1, AHCY, NUTF2, PSAT1, SSR3, ANKRD10, ODC1, ERH, AASDHPPT, ST6GAL1, CDH17, SLC16A1, RUVBL2, NT5C3A, IFITM3, MGAT5, SOD1, SF3B3, NRGN, MSH2, CDK4, ADGRG1, CALR, NOP58, RPL23, SYTL3, GATA2, SLC1A5	Up-regulated
BROWNE_HCMV_INFECTION_10HR_up	0.0256002	0.0734191	0.373305	1.41705	224	96	SLC7A5, CDC6, NUP58, TIAL1, POM121, FUBP1, YKT6, TOP1, DIS3, DNAJC3, ATP6V1C1, TAF5L, SULT1A2, CCNE2, FEN1, CREM, DNAJB6, TAF4, RSRP1, CEL, NCF2, DNAJB9, ZNF428, NFATC3, POU2F1, FOXJ1, IL24, LIG4, ZNF473, BRAF, GNL1, IFI6, ASCL2, GBP1, NKX2-5	Up-regulated
BROWNE_HCMV_INFECTION_10HR_dn	0.427895	0.59892	-0.234104	-1.0094	812	53	KLF9, FRY, TTC30A, ZSCAN26, PNOC, NR3C1, MTUS1, SLC5A4, EMP1, ZNF23, PTGFR	Down-regulated
BROWNE_HCMV_INFECTION_12HR_up	0.0149321	0.0475327	0.37914	1.46108	132	109	STIP1, SLC12A2, WDR82, B4GALT5, IFRD1, TERF1, PPAT, DFFB, CDC40, ITGA2, PLAGL2, TAP1, ASNS, RRAGD, FBP1, NPIPB3, ZFY, FEN1, CXCL8, GK, MFAP3L, HS3ST1, HOMER1, TESK2, AUTS2, TRIM21, TRAF6, AHCTF1, RAB5C, RNF19B, TGFBRAP1, SRP19, BRAF, CFDP1	Up-regulated
BROWNE_HCMV_INFECTION_12HR_dn	0.109032	0.227298	-0.246019	-1.18695	133	95	FGF7, PDGFRA, CMA1, CXCL12, GLI3, ATP12A, PLCE1, MAMLD1, ID2, VWA5A, NREP, PMP22, SLC12A1, MAST4, KIAA1549L, ATXN1, PTPRR, SSH1, RUNX1T1	Down-regulated
BROWNE_HCMV_INFECTION_14HR_up	0.000543537	0.00335376	0.409216	1.62592	4	147	CERS6, SLC7A5, CDC6, USP1, PDIA4, CDK2, DBF4, AMD1, MARCKSL1, NEU1, ATP6V0B, RPIA, GRPEL1, CCNF, MED1, TIMM44, TOP1, POLR2H, BAZ1A, UBE2M, ATP6V1C1, KLHL18, ETV5, KLHDC10, SULT1A2, CCNE2, RBM14, POLE3, FEN1, USPL1, UBE2S, SMURF1, UBN1, DDX3Y, GCLC, RSRP1, FZD5, ZNF143, DCTN5, SRRT, RGS19, NFATC3, VCP, PPP2R2A, NDEL1, HOXB2, SMG7, ISG20L2, CDR2, LEF1, SPAG1, EIF4A3, TAF5, PNO1, CCDC93, PNN	Up-regulated
BROWNE_HCMV_INFECTION_14HR_dn	0.758784	0.85942	0.212842	0.88674	7363	272	MIPEP, PSMG1, TIAL1, MET, TMCO6, STAMBP, GINS1, ERLIN2, AGFG1, CCNB2, CDC25B, DHFR, MRPS31, ITGA2, EIF3J, ZKSCAN1, CDC14B, DTYMK, HSPA4, CIT, ETFB, ABCC1, TULP3, ATG5, GPSM2, CLDN4, TTF2, PARP4, BTN3A2, VPS41, MMP3, ZFR, DYNC2LI1, HNRNPU, CASP1, SYNJ2, TIA1, EEA1, G0S2, ANXA2, NDUFS2, RBM10, PSMB10, VAMP4, SMS, MPI, RAD50, PLAUR, ACAT2, MGMT	Up-regulated
BROWNE_HCMV_INFECTION_16HR_up	0.00156855	0.00765643	0.364682	1.49876	14	217	SEC23IP, CDC6, STIL, DDX21, TFRC, WDR82, SLC7A1, SLC25A13, MPP6, CCNC, DDX10, GNL2, GABRE, FUBP1, E2F5, DFFB, USP6NL, CDC40, KLHL23, TMF1, YKT6, DR1, RFXAP, RAD51C, POLR2H, TUBGCP4, PGM3, HLTF, NUP153, NFE2L3, SRSF10, TEX30, ZFY, SLC16A1, ATP7B, GK, CREM, POP7, VLDLR, ZNF593, ARFGEF2, SUZ12, MAT2A, DTNB, BTG3, TESK2, BAP1, EPHA2, DCAF7, PTPN11, HSPA12A, ISL1, POU2F1, KPNA6, ACSM3, BAK1, RNF19B, S…	Up-regulated
BROWNE_HCMV_INFECTION_16HR_dn	0.00071736	0.00410187	-0.376033	-1.77906	0	84	ADH1B, DCLK1, METTL7A, TSHB, NRP1, MT1B, MT1H, SEMA5A, ID2, ANKRD1, SLIT2, PTX3, NAAA, ROR2, TRAM2, ANPEP, THBS1, ADH1A, GJA1, CHN1, STMN2, DHRS3, COL1A2, ADIRF, FILIP1L, PBX1, COL1A1, APOBEC3C, ADAMTS2, ACADVL, AP4S1, FGF2, WNT5A, KIAA0930, TPM1	Down-regulated
BROWNE_HCMV_INFECTION_18HR_up	0.000107562	0.00109167	0.421151	1.69092	0	165	SEC23IP, FNBP1L, UBFD1, SLC25A13, MET, TGDS, PDIA4, CDK2, AMD1, PPM1G, TERF1, TMPO, NOP16, MTHFD2, E2F5, ERBB3, MAGOH, SEC23B, E2F3, NELFA, TAP1, POLR2H, PPP3R1, RIF1, BAZ1A, HLTF, RPP30, TM4SF1, MCM3, UTP20, ETV5, CDC27, THOC2, CXCL8, MKLN1, CD2AP, CREM, MPHOSPH9, SNX27, SLC29A2, HELZ, TOR1B, DDX18, COIL, FANCL, RUNDC3B, WWP1, SORCS3, NCF2, CASP2, PARP2, MED13, SPAST, ZNF473, SMG7, RBBP4, SAR1A,…	Up-regulated
BROWNE_HCMV_INFECTION_18HR_dn	0.00151976	0.00744988	-0.337839	-1.79409	0	173	ABCA8, GUCY1A2, RBMS3, CIRBP, ANGPTL2, LOXL1, PTGIS, GPR171, GREM1, CA12, PRKCB, GLI3, LPCAT4, KCNF1, PNOC, SEMA5A, S100A1, DST, TPM4, ID2, ID1, CTIF, PTGER1, PTPRD, PCYT2, MSC, GNG11, OBSL1, ARHGAP1, THBS1, RAB3B, COL6A2, CACNA1A, MYLK, RPS6KA2, AXL, ADH1A, GPR176, EMILIN1, OPLAH, ZNF688, PRKACG, P2RY10, FGF13, TRIOBP, COL6A1, PAMR1, KCNK2, CDH6, UGT2B7, TBCD	Down-regulated
BROWNE_HCMV_INFECTION_1HR_up	0.988254	0.994303	0.167252	0.577155	7992	52	TFRC, KLHL23, UBE2B, CXCL8, HTR7, PTPN11, VAT1, IL24, CXCL1, MMP14, MAZ, MT4, FGFR3, HLF, CXCL2, PPP1R13B, POU1F1	Up-regulated
BROWNE_HCMV_INFECTION_1HR_dn	0.203893	0.36083	0.279417	1.1429	1937	206	PMS2P3, TMCO6, CCNB1, TOX4, PAX2, XCL1, E2F1, PAK1, MYB, SMAD5, RER1, PSMD13, PMS2, ATF1, RNF216P1, EMG1, TERF2, RIF1, PPARG, HSPA4, PRRC1, ETFB, THOC1, GCNT1, CLDN4, TTF2, TRAC, BCS1L, PPIH, ICA1, IMP4, DUSP9, HMGCL, HOMER1, DCAF7, ZNF174, KIF14, POLD2, E2F4, FOLR2, INHBA, COL11A2, SLC16A5, KRR1, MGMT, CUBN, CGGBP1, SIX1, GTF2E1, TAF1B, ESM1, CTPS1, WT1-AS, ATF7, RDH11	Up-regulated
BROWNE_HCMV_INFECTION_20HR_up	0.0734021	0.169869	0.300563	1.24009	703	229	TFRC, PIP5K1B, B4GALT5, CCNC, TOX3, TMPO, DFFB, USP6NL, ERBB3, ATXN7L3B, PROX1, SEPHS1, TUBA4A, PDK3, SMARCD2, DDX52, PLAGL2, DNAJA1, ZNF267, UBE2M, PGM3, TRMU, IMPA1, UBE2H, THOC1, ETS2, TEX30, TOE1, SULT1A2, ZFY, EFNA4, MARK2, UBE2S, TFDP2, ZNF593, ARHGAP32, NRGN, SRSF3, SLC6A6, ERP44, BAP1, ZPR1, SRRT, ELK4, TRIM21, LCN2, PTPN11, AHCTF1, NFATC3, KPNA6, BAK1, RNF19B, TGFBRAP1, CGGBP1, TRIM33, Z…	Up-regulated
BROWNE_HCMV_INFECTION_20HR_dn	0.00405844	0.0164713	-0.324166	-1.56081	4	94	BICC1, FRY, MT1B, DST, RGS4, ROR2, TRAM2, PMP22, KIAA1549L, WIPI1, FST, PDE4B, TRAF3IP2, AXL, CHMP2A, RUNX1T1, BBS4, TRIM22, TNFRSF14, PTGFR, SYT11, ITGA3, SLC22A4, HMMR, COL1A2, LPP, ADIRF, MBNL1, CRADD, REV3L, FILIP1L, ETHE1	Down-regulated
BROWNE_HCMV_INFECTION_24HR_up	0.00480402	0.0189766	0.376528	1.48953	43	141	EPHB2, PDIA4, CDK2, PPM1G, TERF1, SLC29A1, E2F5, GRPEL1, SEC23B, E2F3, NELFA, EPCAM, SNRPB, PRIM1, TGIF2, SYNGR2, PPP3R1, BAZ1A, AK4, HLTF, BRINP1, FKBP1A, ETV5, TOMM40, GORASP1, MSI1, PAK2, TAF5L, CXCL8, CREM, UNC13B, COIL, HTR7, DTNB, KEAP1, FZD5, MCM7, LRP8, ZNF195, KBTBD11, SPR, POU2F1, RAB5C, PARP2, N4BP1, CHRNA5	Up-regulated
BROWNE_HCMV_INFECTION_24HR_dn	0.0855803	0.190211	-0.231021	-1.18024	72	138	ABCA8, GRIA3, LPAR1, FBN1, CA12, KIT, ACTA2, SEMA5A, DST, GRIK2, TP53I3, SLC14A1, VWA5A, PRKG1, PTPRM, DBP, THBS1, RPS6KA2, SSH1, GPR176, SUCLG2, HIPK2, CRIM1, PAMR1, CALD1, CXCR2, TIMP3, MXRA5, CAV1, SGCB, LAMC1, MGST3, TGFBR2, OLFML1, TPM2, SLC16A4, HOXA11, BST1	Down-regulated
BROWNE_HCMV_INFECTION_2HR_up	0.0018075	0.00847243	-0.4441	-1.76761	3	38	ADH1B, PTGDS, MFAP4, ADH1C, EGR1, CHRDL1, VWA5A, FOS, NR4A3, ADH1A, GCH1, NR4A2, ADCY1, DHRS3, NR4A1	Down-regulated
BROWNE_HCMV_INFECTION_2HR_dn	0.0220193	0.0656017	0.443775	1.50247	175	47	STIP1, PRIM2, UBE2C, MYC, KIF23, ITGA6, CENPF, ITGA2, BIRC5, ABCC1, CYP2J2, PAK2, MMP3, RAD23A, ANXA2, TNP2, KRT19, PLAUR, NAP1L1	Up-regulated
BROWNE_HCMV_INFECTION_30MIN_up	0.0826792	0.185107	-0.305077	-1.29979	157	51	ZFP36, CTNNA2, EGR2, APOM, RHOB, PLXDC1, TSPY2, FOS, THBS1, CBARP, COL6A2, ADH1A	Down-regulated
BROWNE_HCMV_INFECTION_30MIN_dn	0.379783	0.554437	0.26664	1.05098	3463	135	BRCA2, AURKA, CDK1, MOGS, LMO7, DHFR, CDC40, RPSA, KNOP1, RER1, ORC4, MAPKAPK5, VAPB, MIOS, TMEM186, CYP4F2, OPRK1, ATG5, USPL1, BTN3A2, VDAC1P3, CXCL6, MMP3, RSRP1, EEA1, TNFRSF1B, CEL, LRP8, ZNF124, SUCO, GRM5, CUBN, EEF1A1, ACTN2, SOCS1	Up-regulated
BROWNE_HCMV_INFECTION_48HR_up	0.00950043	0.0329939	0.350343	1.41439	88	176	CKS2, FNBP1L, GGCT, USP1, SORD, GGH, BRCA1, RFC4, EEF1E1, AMD1, CELSR2, E2F5, CCNF, MAGOH, POLE2, PSMD11, PDK3, ANXA3, DHX9, SLPI, POLR2H, ATG12, RFC3, MRS2, NUP153, PAWR, EZR, HAT1, EPM2A, RNF44, PPP3CB, CDC7, SPINK1, ATP11A, CD2AP, ZNF529, VIL1, ABCB7, TOR1B, RUNDC3B, ATP6V1B2, MSH2, TNP1, TPST2, MAD2L1, BTF3P12, NFATC3, NEMP1, PRPS2, IL24, SAP30, SLC25A5, CREBZF, COBL, LILRB4, POLA2, CD24P4, P…	Up-regulated
BROWNE_HCMV_INFECTION_48HR_dn	0.0434783	0.113324	-0.196149	-1.14193	2	467	CLCA1, RCAN2, SVEP1, LAMA2, EFEMP1, MEIS3P1, CFH, HOXD3, PYGM, CDR1, SLCO2A1, CSRP2, FCMR, MATN2, EMP3, CXCL12, ZFP36, HAS2, CA12, NFATC4, MDFIC, JUND, EPAS1, FGFR1, TMEM109, MYH11, TTC30A, ZSCAN26, ANG, OSMR, MT1G, PNOC, PTGDR2, PPP2R3A, ACACB, TPM4, EFEMP2, MAN2B2, FBLN5, VPS39, GHRHR, TAGLN, PTGER1, PTPRD, CDH16, HBB, CRMP1, FRMPD4, SLC12A1, MSC, WIPI1, RNF10, RBM15B, NTRK2, ADCYAP1R1, PIGCP1,…	Down-regulated
BROWNE_HCMV_INFECTION_4HR_up	0.0977249	0.210047	-0.30144	-1.27942	188	50	PDE4D, EYA2, RIPK1, GRIK2, IFIT1, RFPL3S, IL6ST, NR4A3, THBS1, B3GALT5, IFNA5, PCDH7, ZNF202	Down-regulated
BROWNE_HCMV_INFECTION_4HR_dn	0.0301961	0.0840851	0.315652	1.30702	290	242	RRS1, UMPS, PMS2P3, MDH2, AURKA, SLC7A1, ZP3, DNMBP, POLB, CSTF1, PMS2, MOCS3, PRKAR2A, EMG1, ALDH1B1, VAPB, HMGB2, SUPT20H, CIT, MIOS, ETFB, ZNF623, THOC1, TMEM186, KCNQ1, ZNF274, ATG5, GCNT1, ZNF3, CCNT2, KLHL9, PPIH, BTN3A2, VDAC1P3, TMEM30B, SOX12, CXCL6, NR2E1, JUN, GEMIN2, HMGCL, AP3M2, BARD1, AVL9, AMHR2, RBM10, LRP8, POLD2, PARG, HTR7P1, ZNF195, SLC1A7, PDXK, KRR1, PPP2CA, GRM5, SIX1, GTF…	Up-regulated
BROWNE_HCMV_INFECTION_6HR_up	0.550239	0.706486	0.265967	0.95305	4599	64	EZH2, AMD1, SFPQ, HSD17B1P1, PNP, FBP1, MARK2, CREM, CEACAM6, VIL1, SLC6A6, EIF2AK2, SOX10, ISG15, FOXJ1, OASL, MAPK8, MPL, IRF7, IFI6, GNS, IGF2R, OAS1, MX1, MSLN, C4BPB, HBEGF, HLF	Up-regulated
BROWNE_HCMV_INFECTION_6HR_dn	0.702408	0.820046	0.224142	0.89551	6504	155	CDKN3, ITGA6, CENPF, TBC1D31, CDC40, PIK3R1, PHF20, SMAD5, ORC2, PMS2, RNF216P1, TSC22D2, RPE, WEE1, ZNF623, THOC2, PARP4, ITGAE, STAU2, GAS2, ICA1, COIL, THBD, GPRC5A, GTF2H2, TJP2, MTAP, ARID5B, ZBTB24, RGS19, PCMTD2, EPB41	Up-regulated
BROWNE_HCMV_INFECTION_8HR_up	0.0900544	0.197956	0.33636	1.28234	794	99	DDAH1, TFRC, RSL1D1, DBF4, AMD1, DNAJB1, FNBP4, SFPQ, PROX1, DNAJA1, HSPA1A, EIF5, HSPA13, RB1, MARK2, GK, WNT2, RSRP1, GALNT3, PTPN11, HSPA12A, BTF3P12, NASP, CDR2, CXCL10, RBBP6, GNS, DPAGT1	Up-regulated
BROWNE_HCMV_INFECTION_8HR_dn	0.30577	0.477957	0.33637	1.11442	2410	42	TPX2, MYC, GINS1, MRPS31, ZNF623, KIF2C, TMEM30B	Up-regulated
BROWNE_INTERFERON_RESPONSIVE_GENES_up	0.318863	0.491166	0.30818	1.10132	2658	63	MELK, TAP1, BAZ1A, UBE2L6, IDO1, RBCK1, PSMB9, CASP1, TRIM21, EIF2AK2, ISG15, OASL, ZBTB20, CXCL10, IRF7, IFI6, GBP1, TDRD7, IFI27, STAT1, SP100, OAS1, MX1, IFIT3, MYD88, ISG20, MX2, PLSCR1, IFI44L, IFIT2	Up-regulated
BRUECKNER_TARGETS_OF_MIRLET7A3_up	0.154934	0.29678	0.312584	1.2046	1379	109	FERMT1, PERP, SLC12A2, PON2, B4GALT5, POLB, TBC1D31, PCNA, OSGIN2, PRDX1, VDAC2, CDK6, SLC38A2, PHACTR2, ACYP1, USP9X, SULT2B1, IPO7, TESC, PGD, NOTCH3, CYSTM1, PTPN12, NDRG1, ETV4, PTS, FOXC1, SEC11C, TBC1D15, MFSD12, ABLIM1, TXNRD1, CTH, COX7C, LRP11, ATP1B3, FGG, TMEM230, DUSP5, FAT1, FGB, CXADR, ARHGAP26, ADCK2, CD55, ANXA11, LGR4, RHOV, TFPI	Up-regulated
BRUECKNER_TARGETS_OF_MIRLET7A3_dn	0.0917906	0.200909	-0.268035	-1.23514	141	73	SFRP1, EFEMP1, MT2A, MATN2, MT1X, VIM, PTPRF, RASSF10, LYSMD4, PLK2, FLNB, AKR1B10, COL5A1, TGFB2, SPARC	Down-regulated
BRUINS_UVC_RESPONSE_EARLY_LATE_up	0.000102417	0.00109167	0.388564	1.6275	0	299	NIP7, STIL, CHORDC1, MVD, NDFIP2, TGDS, SLC30A6, SMC3, IFRD1, ZFAND1, RAD18, CSTF3, FUBP1, MITD1, SLC4A1AP, ATG3, CDC40, DGAT1, KDM1A, RPSA, SSB, UBLCP1, NCOA6, E2F3, SPTLC2, INSIG2, ZCCHC14, ANXA3, KCNE3, ARL6IP6, SIVA1, DESI2, ACTR8, C12orf29, DUSP12, TMEM248, URM1, ZMYND8, RMND1, WAC, EBAG9, PINX1, FBXO5, UBE2W, BANF1, EXO1, RPS20, SNX10, RNF115, STAG2, NXPH3, OSBPL6, MSANTD3, ETV5, TULP3, CCN…	Up-regulated
BRUINS_UVC_RESPONSE_MIDDLE_up	0.00205738	0.00947959	0.434554	1.64122	17	93	ARMC10, TMEM41A, POLR1E, PIGF, PTK2, SAC3D1, DEPDC7, MRPS31, CCNT1, PTCD1, DFFB, SPRYD4, KNOP1, IMP3, PNP, MRM1, BRINP1, CAMLG, DDX41, ZFP64, HILPDA, CMTM6, TRIM13, CLDN2, HMGCL, EPHB3, SLC7A6OS, ULK1, SAP30, DCAF4, PIDD1, DEF6, TRAF4, ZFYVE21, NAA30, NATD1, FCHSD1	Up-regulated
BRUINS_UVC_RESPONSE_VIA_TP53_GROUP_B_up	0.312287	0.484808	0.246812	1.05839	3110	527	MIPEP, HSPB11, ALG5, GGCT, TFRC, PIGF, TMEM41B, CENPN, KDM7A, TRMT11, MUC13, RAD54L, DNAJB1, SPTLC1, UBE3D, DEPDC7, LAPTM4B, TSPAN17, ZFAND2A, RNF128, MARVELD2, LGALS8, SMIM15, KRT8, ANXA3, UBQLN1, SMIM12, GTF2IRD1, CD274, GSS, AJUBA, SGF29, RAB21, CFAP61, SPP1, HSPA1A, PGM3, RPE, NABP1, C1GALT1C1, UBXN6, WIPI2, CGREF1, JUP, BCL10, PAK2, RPAP3, S100A6, RINL, PIGM, ZNF3, OCIAD2, YIPF6, METTL6, CMT…	Up-regulated
BRUINS_UVC_RESPONSE_VIA_TP53_GROUP_C_up	0.554353	0.708802	0.254583	0.954006	4813	87	HSPH1, POLQ, TMC5, SDC4, SLC22A3, ATP6V0C, MTCH2, ENTPD6, NMU, UBA1, GNG5, CXCL6, LCN10, LENG9, CCNK, EIF3G, SH3GL2, IP6K2, FOXQ1	Up-regulated
BRUINS_UVC_RESPONSE_VIA_TP53_GROUP_D_up	0.927184	0.959451	0.186588	0.775961	8976	264	VDAC1, DDX21, TRMT13, C12orf45, PTK2, HOOK1, GJB3, CACUL1, AZIN1, C20orf27, KDM5D, ALDH1B1, TSC22D2, RNF165, EFCAB1, ZRANB2, EXOSC6, LGR5, HSPB7, TPI1, DNM1L, LRRC15, PUS3, STT3A, TMEM176A, MZT1, KDELR2, ZC3H13, NDOR1, PITX3, CHRNA6, PRDM4, LAT2, MFSD6, RAB15, SLC17A9, COPB1, TGFBR3, CNFN, SPOPL, SCGB3A1, BCL2A1, ETV4, GAPDH, PLOD3, CTPS1, PHKG1, TMEM170A, KIF26B, GTPBP4, LGALS3, SYNPO2L, TBX20, …	Up-regulated
BRUNO_HEMATOPOIESIS_up	0.383493	0.55808	0.295384	1.05846	3205	64	GLB1, DHCR7, MSMO1, AK4, SLC39A6, FKBP1A, HMGCR, S100A6, TSPAN32, CD9, ANXA2, RCN1, ENAH, LAT2, ELF1, SQSTM1, LILRB4, IGFBP7, SESN1, NOCT, RNF19A, HSD17B10, VAMP5, GZMB, GALK1, CD55, BNIP3, NET1, MNDA, PRDX4, CRISP3	Up-regulated
BUCKANOVICH_T_LYMPHOCYTE_HOMING_ON_TUMOR_up	0.756575	0.857974	0.28151	0.793826	5407	19	STK3, MYCBP2, NOL7, PRPF38B, MICAL1	Up-regulated
BUCKANOVICH_T_LYMPHOCYTE_HOMING_ON_TUMOR_dn	0.581118	0.730149	0.318441	0.918992	4197	21	SAC3D1, SEC61G, SPIDR, ALDOA, MPHOSPH9, ATP9A, WT1-AS	Up-regulated
BUFFA_HYPOXIA_METAGENE_up	0.000124332	0.00109167	0.667307	2.28158	0	49	ANLN, CDKN3, PSMA7, MRPL13, MRPS17, SEC61G, KIF20A, PGAM1, SLC25A32, YKT6, SHCBP1, MAD2L2, AK4, MCTS1, ESRP1, PNP, CHCHD2, P4HA1, MIF, TPI1, SLC16A1, HILPDA, ENO1, TUBA1C, MRPL15, CA9, MRGBP	Up-regulated
BURTON_ADIPOGENESIS_1_up	0.0342466	0.0932763	-0.398525	-1.49672	84	30	SGK1, FOSL2, IL6, RHOB, DLX2, ID3, NR4A2, UNC45A, MAFF, CEBPD, ARL4C, IER3	Down-regulated
BURTON_ADIPOGENESIS_10_up	0.123143	0.249593	0.424268	1.30792	919	29	NSDHL, STRBP, DOCK9, CETN2, MSMO1, ATP6V1C1, NOL7, UBA3, SQLE, HMGCS1, FDFT1, LRRFIP1, FDPS, PYGB	Up-regulated
BURTON_ADIPOGENESIS_11_up	0.246777	0.411564	0.337675	1.15887	1990	50	SLC12A2, LMO7, SLC25A36, ATF1, RBM39, PAXBP1, IDI1, RNF13, ARFGEF1, EPHB3, RASA1, SMS, PNRC2, IRF1, GBP7, ALCAM, KIF5B, KIF16B, TOP2B	Up-regulated
BURTON_ADIPOGENESIS_12_up	0.000269433	0.00192578	0.680675	2.08421	1	28	MKI67, BUB1, UBE2V2, ARGLU1, DNAJC3, EMC2, HNRNPM, PTBP3, SRSF10, KIF2A, TMEM68, RSRP1, SP3	Up-regulated
BURTON_ADIPOGENESIS_2_up	0.366497	0.540874	0.292675	1.06543	3097	71	HSPH1, PA2G4, LIMK1, GSTO1, NOP56, HSPD1, NSUN2, SFPQ, SRM, GRWD1, HSF1, CAD, SLC6A6, SERP1, PGD	Up-regulated
BURTON_ADIPOGENESIS_3_up	0.000113443	0.00109167	0.660369	2.51819	0	100	TFDP1, CKS2, CDCA7, PLK1, EZH2, KPNA2, MKI67, E2F8, CDC6, BUB1, AURKA, CDK1, RAD51AP1, USP1, TTK, BRCA1, KLF5, TOP2A, CKS1B, POLA1, MCM10, CCNB1, CCNB2, SLBP, PCNA, PRC1, CCNF, KIF20A, CENPK, BIRC5, IMPDH2, PRIM1, DLGAP5, TCF19, DTYMK, PNP, KIF11, ATF6B, HMGB2, MCM3, TACC3, CDCA8, KIF2C, CDC7, CCNE2, FEN1, CSTF2, HELLS, CDC20, RRM1, INCENP, SMC2, MCM7, MAD2L1, CDC45, NUSAP1, NASP, KIF22, SLCO3A1,…	Up-regulated
BURTON_ADIPOGENESIS_4_up	0.00138871	0.00702445	0.517427	1.72967	10	44	CSE1L, PPM1G, DPEP1, NSUN2, EMC8, LSM3, EPHB4, ENTPD6, ATP6V1F, ZNF706, CCT3, ABCF2, UCHL5, ADIPOR2, CMC2, NHP2	Up-regulated
BURTON_ADIPOGENESIS_5_up	0.000112133	0.00109167	0.520024	2.00713	0	111	TMEM97, MDH2, PRELID3B, FDX1, MRPL18, PPA1, PRDX3, TIMM9, MRPL20, TYSND1, DBI, GRPEL1, PDIA6, NDUFAB1, PHB, PPIF, CYC1, UQCRH, TBL2, AIFM1, MRPL34, CYCS, PPARG, PTCD3, ALDOA, TALDO1, ETFB, LMAN2, PSMA1, TOMM40, GNPAT, CISD1, ATL2, GK, FABP5, PSMA5, TIMM23, PRPS1, TOB1, AK2, MRPL15, DNAJB9, SDHD, TIMM17A, ORMDL3, SLC1A5, SLC5A6, MRPS26, COX17, ISCA2, TIMM8A	Up-regulated
BURTON_ADIPOGENESIS_6_up	0.000424674	0.00280053	0.390124	1.58171	3	185	PON2, DNAJC15, CHCHD3, TAB3, APOC1, CYB5B, CBR1, ITGA6, COX7A2, HIBCH, NDUFB6, DHCR7, DGAT1, NDUFA5, LDHB, MRPL51, UQCRB, NDUFB2, C20orf27, UQCRC2, TUFM, NDUFB9, SDHB, NABP1, NDUFA9, GRHPR, TKT, GCSH, COX5B, REEP5, MC2R, PXMP2, UQCRQ, NDUFB3, DDT, SDHC, UNC119, PPP2R5A, G0S2, SLC19A1, LCN2, CS, CIDEC, AGPAT3, UQCR10, SOX15, CIB2, PEX19, ISOC1, SLC25A10, PDAP1, DECR1, REEP6, HSD11B1, NDUFB5, CYB5A…	Up-regulated
BURTON_ADIPOGENESIS_7_up	0.25621	0.423307	0.342911	1.15067	2031	45	MARCKSL1, SLC29A1, XPO1, PLP2, NONO, PNP, SSR3, PLXNB2, CCND1, S100A6, IFITM3	Up-regulated
BURTON_ADIPOGENESIS_8_up	0.0511968	0.129554	-0.283693	-1.3178	76	76	FGF7, OGN, PTGIS, SERPINF1, EMP3, CPQ, ACTA2, CMTM3, NCAM1, PHLDB2, PLTP, TPBG, LOX, VCAM1, MSN, PLD3, EMP1	Down-regulated
BURTON_ADIPOGENESIS_9_up	0.522523	0.68582	-0.207499	-0.973208	753	81	SFRP2, CXCL12, GEM, F3, CITED2, AKAP12, FOS, FERMT2, PLK2, RASSF5, ID3, KIFAP3, VCAM1, CEBPD, SLC8A1, CSF1, CNN3, CTNND1	Down-regulated
BURTON_ADIPOGENESIS_PEAK_AT_0HR_up	0.0034662	0.0145309	-0.371678	-1.63327	5	60	ADH1B, OGN, SFRP2, PDGFRA, TGFB3, ACTA2, F3, CTSK, IGF1, PCCB, NREP, MGP, GAS1, VEGFC, APBB1IP, RUNX1T1	Down-regulated
BURTON_ADIPOGENESIS_PEAK_AT_16HR_up	0.000127389	0.00109167	0.626151	2.06219	0	40	CDCA7, CDC6, CHAF1B, DDX21, MRPL18, SNX5, DUT, ASS1, HMGB2, HAT1, HMGA1, MCM3, ABCF2, FEN1, GRWD1, PGP, HELLS, PRPS1, SMC2, MCM7, NAP1L4, ABCF1, IFRD2	Up-regulated
BURTON_ADIPOGENESIS_PEAK_AT_24HR_up	0.000126088	0.00109167	0.680004	2.28181	0	45	ANLN, PTTG1, KPNA2, BUB1, MELK, CDK1, CCNA2, UBE2C, TOP2A, DCTPP1, TRAPPC5, CCNB1, PRC1, STMN1, KIF20A, CDC25C, SLPI, ELAVL1, SRSF1, CDC20, RRM1, CAD, IPO5, LCN2, NUSAP1, KIF22	Up-regulated
BURTON_ADIPOGENESIS_PEAK_AT_2HR_up	0.0864969	0.191876	-0.318767	-1.30759	179	44	RHOJ, SLC20A1, ZFP36, IL6, RHOB, FOSB, FOS, THBS1, ID3, NR4A2, ACKR3, CEBPD, NR4A1, IER3, DUSP1, ADM, KLF4	Down-regulated
BURTON_ADIPOGENESIS_PEAK_AT_8HR_up	0.226602	0.388617	0.363578	1.18499	1764	38	HSPH1, KLF5, PPA1, GSTO1, NOP56, XPO1, TOP1, SLC16A1	Up-regulated
BYSTROEM_CORRELATED_WITH_IL5_up	0.160426	0.303262	0.376005	1.24321	1263	41	HDAC2, E2F1, HDGF, SET, TSPAN32, CTSH, TACSTD2, STX3, GORASP2, GATA2, RPS12, RPL41, RBBP4, GTF3C1	Up-regulated
BYSTROEM_CORRELATED_WITH_IL5_dn	0.267827	0.43732	0.323535	1.135	2200	57	TFDP1, SYK, TMPO, PIK3R1, PAPOLA, SSR3, RNF13, PITPNB, KPNA3, TRAM1, MAPK9, SRSF1, INCENP, RAB10, ADAM10, ITGAL, CAND1, DDB1	Up-regulated
BYSTRYKH_HEMATOPOIESIS_STEM_CELL_AND_BRAIN_QTL_CIS_up	0.00688572	0.0253155	0.449402	1.59548	56	61	HJURP, GLO1, SNRPB2, SC5D, ARL6IP1, TOX4, MED1, SPG21, TUBGCP4, CLEC16A, DAP3, SARAF, GFER, DCTN6, SRP9, DPP7, NECAP2, ZFAND5, RPL26, AGTRAP, CPSF2, PRDX2, CUX1, GEMIN5, MRPS7, SCOC, MTIF2, DDA1, ZFP91, NDUFA7, OCEL1, ALDH9A1, ALAD, MNDA, THUMPD1, VPS52, MRPL44	Up-regulated
BYSTRYKH_HEMATOPOIESIS_STEM_CELL_AND_BRAIN_QTL_TRANS_up	0.00119138	0.00618254	0.390411	1.55574	10	151	MKI67, E2F8, UTP4, SYPL1, EIF5B, SFR1, SFPQ, CSNK2A2, ZFYVE16, CETN2, SPTLC2, MRPL50, GDI2, S100PBP, ZNF574, SNRPB, LRRC58, VDAC2, AHCY, RPF1, SEMA4F, PTCD3, MRPS5, MSI1, CHCHD7, PXMP2, MKLN1, FABP5, DNAJB6, PSMD14, NSD1, NDUFS2, NOP58, OTUB1, ORMDL3, NANS, PGAP2, C4orf3, SF3B5, RNF19B, RANBP9, BLM, ZMYM4, EYA3, ANP32A, CCDC6, TPST1, TBC1D15, DNAJB11, NAA30, CTCF, NME3, ZFR2, SLC35C2, EGF, BAZ1B,…	Up-regulated
BYSTRYKH_HEMATOPOIESIS_STEM_CELL_QTL_CIS_up	0.000111123	0.00109167	0.439421	1.71327	0	124	HJURP, DIAPH3, GLO1, SNRPB2, PON2, GGH, F11R, NSDHL, ATAD1, CBR1, SC5D, ARL6IP1, DBI, TM2D3, MED1, SPG21, TUBGCP4, ST6GALNAC4, TMEM234, ADPGK, CLEC16A, NABP1, DAP3, LIG3, TMCO1, CNIH1, PSMG4, NUB1, SARAF, GFER, DCTN6, SRP9, ATP6V1B2, DDOST, ADGRG1, RCN1, DPP7, VAMP4, NECAP2, CRYZ, SPAST, RPL26, AGTRAP, CPSF2, PRDX2, MSH5, CUX1, NPL, GEMIN5, GPI, MRPS7, SCOC, CREG1, UBAP2L	Up-regulated
BYSTRYKH_HEMATOPOIESIS_STEM_CELL_SCP2_QTL_TRANS_up	0.634117	0.768115	0.294047	0.885705	4668	26	HSP90AB1, SRSF10, ATP7B, ZC2HC1C, DNASE1L2, PCSK4, POLD4, DHX40, TEP1, ATXN2, PSMD3	Up-regulated
CADWELL_ATG16L1_TARGETS_up	0.94498	0.968547	0.183911	0.701724	8329	101	CHAC1, DGAT2, ZKSCAN1, C1QTNF1, WFIKKN2, SAA1, APOC2, CIT, RBM45, SLC36A2, TMEM116, LHFPL2, GSDMC, HSPA12A, CIDEC, SSR1, ISG15, THA1P, SAA2, SUCNR1, FBXO41, NEUROD2, PDZK1, CCDC74B, KIAA1671, EXOSC10, TRIM15, GZMB, MTTP, ADIG, CXCL2, RHOV, ADIPOQ, SERPINA10	Up-regulated
CADWELL_ATG16L1_TARGETS_dn	0.00960452	0.0332653	-0.349762	-1.53052	16	58	SFRP1, SGK1, PDK4, SLC15A2, ST6GALNAC1, SMIM10, CAMK2D, YTHDC2, VPS39, PLET1, GIP, MCC, TMEM242, VCAM1, PPARGC1A	Down-regulated
CAFFAREL_RESPONSE_TO_THC_up	0.00753072	0.0273265	0.533063	1.66891	56	31	RPS2, TFRC, MYC, ZNF451, SLC3A2, ASNS, IMPA1, ZRANB2, FNTA, IPO7, UBR4, USP3, CENPL, SEC31A, MCCC1, SHMT2	Up-regulated
CAFFAREL_RESPONSE_TO_THC_dn	0.000528471	0.00329614	0.604766	1.8934	3	31	HSPH1, CYP51A1, CDK1, CCNA2, DHFR, DHCR7, SPIDR, PPIF, DNAJA1, PNP, MCM3, HSPA8, UHRF1, SRSF3, EBP, TUBB, PABPC4, TUBA3C, CALM3, MCM6, SESN1, TUBA1A	Up-regulated
CAFFAREL_RESPONSE_TO_THC_24HR_5_up	0.000398936	0.00270841	0.621783	1.93036	2	30	CKS2, RPS2, CCNA2, PSMA2, TFRC, PCNA, EIF2A, PNP, RBX1, UHRF1, FNTA, MYL6B, TUBB, EXOSC4, DDB1, LIG4, KHSRP	Up-regulated
CAFFAREL_RESPONSE_TO_THC_24HR_5_dn	0.000124549	0.00109167	0.544628	1.85338	0	48	CDK1, UBE2C, DUT, SLC3A2, SPIDR, SUB1, RANBP1, RAB2A, NME1, ASNS, IMPA1, ZRANB2, EIF5, NDUFA1, PPIH, NDUFB3, EBP, NUSAP1, UBR4, CENPL, FXYD3, MCCC1, SHMT2, ALG2, CALM3, COPB2, TUBA1A	Up-regulated
CAIRO_HEPATOBLASTOMA_up	0.000946372	0.00516132	0.375786	1.53666	8	204	SCD, FNBP1L, CD46, CYP51A1, SMARCC1, POLR1D, HSP90AB1, NSDHL, MLEC, HDAC2, ITGA6, SAC3D1, ACLY, TARBP1, EHMT2, PPP1CC, TMEM243, SMYD3, R3HDM1, CETN2, SEPHS1, SLC25A36, EPCAM, DDHD2, CLIC1, IMPDH2, HEATR1, MFF, ZBTB38, UGGT1, DENR, MCM3, CCT3, LGR5, HMGCR, GNPAT, TSN, CPD, RRP1B, RNF43, SMYD2, ITGAE, MMP11, SQLE, TIA1, MINPP1, CBX1, CDK4, TOMM20, SP3, AVL9, HMGCS1, CS, GORASP2, SUCO, PDXK, NAP1L1,…	Up-regulated
CAIRO_HEPATOBLASTOMA_dn	0.00294985	0.012846	-0.272176	-1.49697	0	257	ZG16, STAB1, IL13RA2, CA2, PAPSS2, VSIG4, SLC20A1, PZP, LYVE1, ADH1C, ANG, ACADS, CPT2, ACACB, IGF1, DNASE1L3, AGXT, ANO1, SARDH, ID2, GRAMD4, FOXO1, PXDC1, MCL1, CP, GHR, FXYD1, CYP4F11, MT1M, CD14, ARHGEF26, C1R, SLC10A1, TDO2, CYP1A2, PRG4, SUCLG2, CDA, MYOM1, GCH1, FAM149A, ECM1, PPARGC1A, SOCS2, MAT1A, MASP2, C8G, CFHR4, TSPYL5, AASS, HGD, GPLD1, CETP, ITIH4, ACADL, STAB2, XDH, CYP2C18, KDM8…	Down-regulated
CAIRO_HEPATOBLASTOMA_CLASSES_up	0.000100321	0.00109167	0.656878	2.82501	0	578	TMEM97, CKS2, TPX2, CCT6A, PLK1, CSE1L, ATIC, CERS6, BRCA2, HJURP, SEC23IP, SERBP1, EZH2, TOMM34, CDKN3, EIF2S2, RPL8, RRS1, KPNA2, MKI67, SMARCC1, DKC1, NIP7, NDC1, EIF3E, CDC6, SKP2, GNL3, BUB1, AURKA, CDK1, GGCT, CCNA2, PSMG1, RAD51AP1, UGGT2, PTDSS1, STOML2, NOLC1, MYCBP, BZW2, NUFIP1, TTK, RPS21, UBE2C, TRIP13, EXOSC2, TFRC, CCT5, GTF3C3, C1QBP, SLC39A4, HSP90AB1, TOP2A, CCT2, PPA1, GART, RF…	Up-regulated
CAIRO_HEPATOBLASTOMA_CLASSES_dn	0.00203252	0.0094027	-0.443607	-2.37628	0	204	ADH1B, FAT4, HIVEP2, SVEP1, LAMA2, RCAN1, SLC4A4, GFOD1, C7, CSRP2, GPR171, EMCN, SNRK, KLRB1, FRY, SMAD7, ADH1C, ITIH5, CYP2C9, COPZ2, ZEB1, EGR1, IGF1, DNASE1L3, HTRA1, SGPL1, C1QTNF3, IL1R1, UGT2B4, GHR, ITGA8, DBP, ITM2A, TSC22D3, MAST4, IL6ST, FAS, APCS, TK2, LMOD1, WFDC1, MYLK, C1R, UBA7, NTF3, SLC10A1, SYNPO, ADH1A, TRANK1, VSTM4, ECM1, RAMP3, TRIM22, DAPK1, AR, HGD, HOMER2, CYLD, ZCCHC24,…	Down-regulated
CAIRO_HEPATOBLASTOMA_POOR_SURVIVAL_up	0.0786213	0.178571	0.522241	1.4096	551	16	BUB1, RPL10A, E2F5, DLGAP5, DUSP9, APOC4, ALDH2	Up-regulated
CAIRO_LIVER_DEVELOPMENT_up	0.00280899	0.0123376	-0.279523	-1.47036	1	162	BASP1, PDZRN3, CD248, FAM174B, CDK14, CSRP2, PDGFRA, EMCN, PTN, SMARCA1, PDZD2, FGFR1, MSANTD3-TMEFF1, ADGRL2, COLEC12, EHBP1, MFAP2, EVL, TMEM50B, CPM, ARMCX1, ITGA8, RHOB, CDH16, MAP4K1, GAS1, CAPN6, LXN, LRP12, PLK2, ID3, KIFAP3, PITX2, TGFB2, GJA1, CYSLTR1, ACKR3, ZNF423, TULP4, LPAR4, FGF13, PLOD2	Down-regulated
CAIRO_LIVER_DEVELOPMENT_dn	0.105033	0.221977	-0.212697	-1.14417	47	214	ABCA8, GSN, NID1, CFH, C1QA, SERPINF1, MATN2, CPQ, ANGPTL3, CES1, MAOB, KIF13B, H6PD, PLAC8, PCYT2, ARG1, LRP1, CCR2, S100A9, AMY2A, ALDH1L1, CYBB, FGA, A2M, ITIH2, AGT, PGM1, PIPOX, SELENBP1, SLC2A4, ETFA, SMPDL3A, LCP1, C8G, GPLD1, ASGR2, CYLD, ITIH4, STAB2, C3, HPN, ENTPD5, TFR2, HMGCS2, SERPINA1, SSTR2, AQP9, SPP2, PON3, F10, IGFBP1, ACADM, GLDC	Down-regulated
CAIRO_PML_TARGETS_BOUND_BY_MYC_up	0.0103008	0.0348893	0.57572	1.67759	74	22	CDCA7, CCNB1, CUL1, NPM1, EIF2A, YBX1, PTMA, DDX18, CAD, CDK4, DNPH1	Up-regulated
CAMPS_COLON_CANCER_COPY_NUMBER_up	0.163814	0.30777	0.322499	1.21091	1425	88	NDUFA4, DAZAP1, GPALPP1, PYCR1, LCN8, BOP1, TOP1, MAPKAPK5, KRT37, ANKRD10, RPS15, KRT33A, DACH1, LCN10, KRT15, KRT33B, P4HB, CANT1, EIF1, NRAS, MSI2, MPRIP, MAFG, SIRT7, USP32P2, KRT34, XPNPEP1, ANAPC11, CCNYL1	Up-regulated
CAMPS_COLON_CANCER_COPY_NUMBER_dn	0.277368	0.447659	-0.241755	-1.0825	450	65	NEGR1, CFHR1, CES1, GDF3, HERC2P3, AMY2A, OR2T11, AMER1, OR4S2, RBFOX1, CFHR4, BTNL8, NME7, BCAR3, MACROD2	Down-regulated
CARD_MIR302A_TARGETS_up	0.0623974	0.150217	0.365172	1.34538	531	77	KPNA2, LIMK1, ZDHHC9, RNF6, CDK2, SRSF2, E2F5, E2F1, CDK6, CNOT7, WEE1, CCND1, RB1, STC1, VLDLR, EIF4G2, TARDBP, FBXO21, PPP6C, FOXJ3, RAB5C, RB1CC1, RBBP4, ARID4B, PFN2, RBBP6, CLOCK, RBBP7, WNT9B	Up-regulated
CASORELLI_ACUTE_PROMYELOCYTIC_LEUKEMIA_up	0.0898876	0.197779	-0.224099	-1.17882	63	162	STAB1, IGHA1, PTGDS, NLRP1, FCMR, ZFP36, AAK1, IGKV3-20, ARHGAP25, CITED2, MST1P2, ID2, PTPRE, GFI1, TSC22D3, FOSB, FOS, CHST11, EVI2A, TPBG, XIST, GPR183, NR4A2, IGKV1D-13, ZSWIM8-AS1, DMXL2, RNF11, KAT6B, FGF13, FLT3, CD96, CEBPD, STK17B, MRC2, NRIP3, WDFY3, DUSP1, GLIPR1, CBLB, ANXA8	Down-regulated
CASORELLI_APL_SECONDARY_VS_DE_NOVO_up	0.00256959	0.0114833	-0.464813	-1.80126	5	34	NID1, CAPN3, CPQ, MAVS, FCGRT, FOSB, SLC36A1, FOS, SLFN12, CLU, PTGER2, MCTP2, CSGALNACT1, ARHGEF40	Down-regulated
CASTELLANO_NRAS_TARGETS_up	0.932646	0.961952	0.192004	0.696591	7864	69	PERP, TAP1, ANXA4, B2M, PCBD2, YIF1A, ERCC5, PPP1R7, LCN2, MEST, ISG15, NQO1, CCNG1	Up-regulated
CAVARD_LIVER_CANCER_MALIGNANT_VS_BENIGN_up	0.294149	0.466724	0.36505	1.13332	2211	30	GGH, PRDX1, SPP1, UBD, SPINK1, RPL13A, DPP4, CHI3L1, SLC25A5, PTGR1, ACTB, FTH1	Up-regulated
CEBALLOS_TARGETS_OF_TP53_AND_MYC_up	0.00475658	0.0188909	0.618303	1.74354	33	19	HSPH1, SRSF7, MYC, INSIG1, MTHFD2, NEK3, DRG1	Up-regulated
CEBALLOS_TARGETS_OF_TP53_AND_MYC_dn	0.0227243	0.0668797	0.495829	1.55234	171	31	CHAF1B, POM121, CKAP2L, KRT8, MLF2, DDB2, TRIM31, KIF14, CSK, PLAUR, DGKZ, SLC4A1, ISCU	Up-regulated
CERIBELLI_GENES_INACTIVE_AND_BOUND_BY_NFY_up	0.451058	0.618915	-0.252068	-1.00214	1022	37	GAS2L1, NEFH, UBASH3A, APOL3, ZNF295-AS1, GAB4, CDH26	Down-regulated
CERIBELLI_PROMOTERS_INACTIVE_AND_BOUND_BY_NFY_up	0.634988	0.768363	0.275838	0.894122	4910	37	DNAJC5, HUNK, TARDBP, OR11H1, SOX10, CHRNA4, PI4KA, CLDN14, DOK5, APOBEC3A, DIDO1, BCRP2, MX1, CTCFL, TFF2	Up-regulated
CERVERA_SDHB_TARGETS_1_up	0.000974659	0.00527806	-0.336985	-1.67293	0	115	FSTL1, JAM2, TNNT1, UGT2B15, WNT2B, MFAP4, TMEM156, BAAT, MGARP, ITIH5, PCSK5, KRT17, EPS8L1, RFTN1, HTRA1, GOLM1, RBP7, GPX8, FEZ1, ASCL1, ITGB6, FAM149A, SOCS2, ACKR3, PACSIN1, TMEM40, PCDH9, MAP1B, SHOX2, IGFBP2, CLIC6, UBASH3B, SGCB, HPSE, LONRF2, ST6GALNAC2, LMLN	Down-regulated
CERVERA_SDHB_TARGETS_1_dn	0.198229	0.354073	-0.305261	-1.17533	469	33	MEP1A, PEG10, ANGPTL3, CCR6, PEG3, CHODL, HMGCS2, MMP16, SLC39A5, CPS1, EYA4, SCGN, ITPR2, TMC8, SH3RF3	Down-regulated
CERVERA_SDHB_TARGETS_2_up	0.283917	0.45488	-0.219449	-1.07966	315	107	SLC26A2, METTL7A, GFOD1, VGLL3, MATN2, NTS, TF, APOM, A2M, TGFB2, SCG5, PRRX1, CSGALNACT1, GJA1, PEG3, HOMER2, TNFSF4, CDH6, COL7A1, GULP1, DUSP1, UBASH3B, FILIP1L, FAT3, MOXD1, SOSTDC1	Down-regulated
CHANDRAN_METASTASIS_up	0.000105152	0.00109167	0.413645	1.69147	0	204	TPX2, SLC7A5, HSPE1, PDP1, CHORDC1, PVT1, DLEU2, UBFD1, INTS8, DAZAP1, RALA, CDK2, LSMEM1, TERF1, NOL8, FNBP4, SFPQ, RIPK2, ZFYVE16, E2F3, PAICS, EP400, RNF216P1, TAF1D, GOLT1A, RBM39, LRRC58, SPP1, ZMYND8, LARP1, TM2D1, HSPA1A, AK4, EIF1AX, DNAJC3, PRRC1, P4HA1, STAG3L3, IBTK, EIF5, NUB1, PITPNB, AGO4, NPIPB3, SULT1A2, ZNF587, SLC16A1, FAM83F, GNL3L, PRAP1, SECISBP2, TMSB10, FAR2P1, NSD1, RNF149…	Up-regulated
CHANDRAN_METASTASIS_dn	0.0041841	0.0168646	-0.297479	-1.67081	0	301	SFRP1, OGN, HSPB8, PER3, CIRBP, VSIG2, MEIS3P1, LPAR1, FHOD3, SLC30A4, THSD4, ASAP3, SLC15A2, BCAS1, PTN, ZFP36, GABBR1, CNTN3, LHPP, TMSB15A, B3GALNT1, PDZRN4, GLI3, SCN7A, RBM24, ITIH5, EGR2, CACNA2D1, EFEMP2, RNF180, PPP1R14A, MAN2B2, NEFH, TMEM199, GOLM1, RARRES1, ARMCX1, MN1, CYBRD1, CLCN7, FOSB, IER2, FGFR2, PSD2, FOS, PARM1, RNF10, PDE4B, CWH43, GPX7, VMP1, MCC, WFDC1, MYLK, KCNN4, MCTP2, …	Down-regulated
CHANDRAN_METASTASIS_TOP50_up	0.00769532	0.0277381	0.518388	1.65297	58	34	RALA, HSPD1, NOL8, TUBA1B, METTL2B, IRF2BP2, LARP1, AK4, EIF1AX, IBTK, HSP90AA1, ZNF587, GNL3L, SOD1, U2SURP, NUCKS1, CELF1, GIT1, MSI2, G3BP1, KMT5B	Up-regulated
CHANDRAN_METASTASIS_TOP50_dn	0.548792	0.704824	-0.235566	-0.948614	1180	40	SFRP1, CIRBP, B3GALNT1, IER2, FOS	Down-regulated
CHANG_IMMORTALIZED_BY_HPV31_up	0.760748	0.860774	0.229696	0.830759	6387	68	DLEU2, CLDN12, SHCBP1, HEY1, PAN3, TCFL5, CTSH, TEX261, G0S2, FANCG, TTC38, PSME4, REV1, HMG20A, PAX8, USP31, UCHL1	Up-regulated
CHANG_IMMORTALIZED_BY_HPV31_dn	0.789506	0.8795	0.228857	0.810503	6529	60	MVD, PRIM1, SLPI, IFITM1, SULT2B1, HMGCS1, SPRR2E, LCN2, DMKN, CD24, SPRR1A, DSP, PEA15, GBP1, PLA2G1B, UBE3B, IFI27, DEGS1, STAT1, SNRPA1, MX1, CTSV, KLK6, TRIB1, BPGM, NMT2	Up-regulated
CHANGOLKAR_H2AFY_TARGETS_up	0.361441	0.537375	0.316401	1.07123	2888	47	SCD, GLO1, SLC25A39, APH1A, KRT23, MYSM1, IBTK, ATP11A, TMEM176A, TMEM70, CCT8, AVL9, CMTM4, TRAF4, CCM2L, SERPINA7, SMURF2, ENPP3, ILVBL, RORA	Up-regulated
CHANGOLKAR_H2AFY_TARGETS_dn	0.642617	0.77292	0.274298	0.88913	4969	37	UTP4, PROX1, MFN1, SECISBP2, CHERP, YBX3, GSTM1, CRYL1, PEX19, SUCNR1, GPR61, EIF4A3, NEK4, GTPBP4	Up-regulated
CHARAFE_BREAST_CANCER_BASAL_VS_MESENCHYMAL_up	0.0444073	0.115224	0.345976	1.34424	398	118	MACC1, F11R, MAL2, CDH1, PDZK1IP1, SLC11A2, GJB3, CDH3, S100P, MARVELD2, CCNL1, SLPI, ESRP1, PRSS8, EHF, COX5B, TMEM183A, TLCD1, RAB25, RNF43, ATP1A1, TMEM30B, OSER1, TACSTD2, KRT15, PRRG4, WDR61, LCN2, ENTPD2, IRF6, ELF1, DRAM2, DMKN, GRHL2, ITPA, TRIM29, MYO5B, SETD6, KIAA0040, FXYD3, LAD1, CD24P4	Up-regulated
CHARAFE_BREAST_CANCER_BASAL_VS_MESENCHYMAL_dn	0.00103413	0.00552855	-0.445137	-1.88933	1	50	RBM24, CMTM3, ZEB1, SCG2, GNG11, RGS7, COL6A2, GFPT2, ARHGEF40, ZCCHC24, ARNT2, MAP1B, SHOX2, GULP1, ALPK2, MMP16, STRADB, PNMA2, AK5, KIF3C, CD99	Down-regulated
CHARAFE_BREAST_CANCER_LUMINAL_VS_BASAL_up	0.0572268	0.141014	0.288312	1.22098	564	364	DENND1A, CERS6, CACYBP, GART, KDM7A, PYCR1, CCT6P3, USP7, STRBP, SHANK2, ERBB3, ATXN7L3B, MCCC2, ZNF12, CRNKL1, ZFYVE16, PRKAG1, SPTLC2, MYB, GSPT1, CACNA1D, CACNG4, GOLT1A, TGIF2, HNRNPA2B1, TIMM44, SYNGR2, RBAK, SOX13, GARNL3, C4orf19, BCOR, NUDT4, STARD10, CCND1, REEP5, ENPP1, USP42, MAPK9, DACH1, TMEM80, ANXA9, PGGT1B, GPR160, RIIAD1, KDELR2, MEGF9, SOX12, ICA1, UBN1, SNX27, MYO6, SECISBP2, L…	Up-regulated
CHARAFE_BREAST_CANCER_LUMINAL_VS_BASAL_dn	0.443223	0.611557	0.238876	1.01811	4394	431	PM20D2, FERMT1, NOB1, PERP, PDP1, NDFIP2, KLF5, TRMT6, SNX7, MET, GART, CBR1, FAM83D, AMD1, ITGA6, PDZK1IP1, DSG2, GABRE, CSNK2A2, GJB3, CRIPT, CDH3, TUBA4A, ANXA3, TBPL1, ANXA4, B2M, SLPI, ANKH, CDK6, CXCL3, TM2D1, KPNA1, ZBTB38, ASXL1, MBNL2, MMADHC, NFAT5, MDH1, NABP1, PSAT1, DCTD, SAA1, FZD6, SRI, FKBP1A, ETS2, MME, TKT, CDCP1, YBX1, S100A10, SLC9A6, GPSM2, SLC16A1, CCDC82, PARP4, P3H2, BTN3A…	Up-regulated
CHARAFE_BREAST_CANCER_LUMINAL_VS_MESENCHYMAL_up	0.000100939	0.00109167	0.367249	1.56351	0	422	CERS6, OCLN, MACC1, GGCT, GPR89B, TMEM41A, F11R, TOX3, MAL2, KDM7A, CDH1, ANKRD22, FAM83H, TPD52L1, HOOK1, CHMP4C, SHANK2, CDH3, ERBB3, MCCC2, S100P, MARVELD2, SPTLC2, ALDH4A1, MYB, ZKSCAN1, PAQR4, GSPT1, CACNA1D, APH1A, CACNG4, EPCAM, KRT23, TMEM241, GOLT1A, FANCF, ZBTB7B, EPPK1, SYNGR2, EPB41L5, LSR, SOX13, ESRP1, AP1M2, CRNDE, C4orf19, PRSS8, PLXNB1, FBP1, JUP, EHF, TMEM183A, STARD10, JTB, REE…	Up-regulated
CHARAFE_BREAST_CANCER_LUMINAL_VS_MESENCHYMAL_dn	0.012987	0.0423966	-0.247505	-1.4373	0	441	SFRP1, FAT4, FSTL1, SGK1, DOCK10, BASP1, RBMS3, LOXL1, LPAR1, FHOD3, GNG2, CSRP2, FBN1, EMP3, HAS2, BICC1, DZIP1, MDFIC, NRP1, VIM, LAYN, AAK1, FOSL2, ACTA2, NID2, IL6, MMP2, OSMR, WWTR1, CORO2B, SNAI2, CMTM3, CLMP, NR3C1, ZEB1, ITPRIP, FAM20C, AKAP12, RFTN1, PPP4R1, RGS4, EFEMP2, EHBP1, TOX, GLIS3, HTRA1, PDE7B, PHLDB2, SLIT2, PTX3, PTPRM, TRAM2, PRR16, BNC2, QKI, FHL1, PMP22, CCDC88A, NR2F1-AS1…	Down-regulated
CHAUHAN_RESPONSE_TO_METHOXYESTRADIOL_up	0.000126247	0.00109167	0.617267	2.06342	0	44	CKS2, PTTG1, SLC7A5, MYC, CCNB1, SRSF2, AHSA1, SLC3A2, HDGF, SRM, DNAJA1, NME1, TIMM44, ATF4, ASNS, UBE2M, UBE2L3, HSP90AA1, HSPA8, UBE2S, TARDBP, UBE2G2, SRSF6, EIF5AL1	Up-regulated
CHAUHAN_RESPONSE_TO_METHOXYESTRADIOL_dn	0.0126869	0.0415347	0.389171	1.48368	111	99	MKI67, UBE2I, HSP90AB1, ARL6IP1, NCSTN, SEC61G, YWHAB, EIF3M, B2M, RPL12, MDH1, ATP6V1F, UBA1, AP3S1, S100A10, SPCS2, UBE2S, BTF3, TMSB10, DDOST, UBC, EIF4B, IDH2, HLA-G, NAP1L1, NRDC, EIF3F, MXI1, EEF1A1, RASA4	Up-regulated
CHEBOTAEV_GR_TARGETS_up	0.354336	0.5311	-0.223779	-1.04091	522	77	SCRG1, TTLL7, PDGFRA, NRP1, TGFB3, PDE9A, NR3C1, NTRK2, TESPA1, RAMP3, IQGAP2, FXYD4, BEST2, FKBP5, GULP1, CMAHP, EDNRA, BCL2L11, CPEB3	Down-regulated
CHEBOTAEV_GR_TARGETS_dn	0.000987167	0.005327	-0.379484	-1.90172	0	119	RSPO3, FCGBP, LOXL1, CPE, GNA14, CXCL12, SMARCA1, PDZRN4, GUCA2A, PPP2R3A, RSAD1, NPTX1, GPAT3, EFEMP2, SARDH, GDNF, PHLDB2, SLC14A1, IRF4, ATP8A1, CH25H, TCEA3, AMY2A, MOB3B, TGFB2, JAZF1, PCDHB5, AR, DNAJC6, GSTA1, ANKRD6, ZFP36L1, CA8, PRKD1, COL1A2	Down-regulated
CHEMELLO_SOLEUS_VS_EDL_MYOFIBERS_up	0.0620182	0.149461	-0.43509	-1.44333	176	19	MYOT, CSRP3, FHL1, ANKRD2, CASQ2, MYF5, TPM2, SMTNL1	Down-regulated
CHEMNITZ_RESPONSE_TO_PROSTAGLANDIN_E2_up	0.000109697	0.00109167	0.60251	2.37304	0	134	CKS2, TPX2, PTTG1, HJURP, CDKN3, PRR11, RPL8, ATAD2, SKA3, MKI67, CDC6, BUB1, AURKA, PVT1, TTK, UBE2C, SLC7A1, TOP2A, HSPA9, EIF4EBP1, NOP16, CCNB1, CCNB2, GMPS, CENPF, MTHFD2, RPIA, GTSE1, PRC1, BRIP1, PCBD1, SNRPA, DGAT1, KIF20A, BIRC5, NCAPG, SLC16A1-AS1, NPM1, PAICS, SCNM1, CHD1L, DLGAP5, RPS9, PCGF1, NUP210, ANAPC1, LARP1, KSR1, BOLA3, WDR76, ATP6V1C1, SLC16A1, AP2S1, UBE2S, C19orf48, NSMAF,…	Up-regulated
CHEMNITZ_RESPONSE_TO_PROSTAGLANDIN_E2_dn	0.0676182	0.16029	0.284977	1.20806	667	371	LSM8, OCLN, MACC1, DNAJC16, NDFIP2, POM121, MET, CLDN12, CYB5B, BCL11A, LMO7, BPHL, KIF9, DSG2, LMTK2, GIPC2, TMEM161B-AS1, PAX2, PPIA, SPTLC2, ARL6IP6, IL17RB, EXO5, SLPI, CDK6, SMAGP, ATXN1L, SLC6A20, NFAT5, STXBP6, VAPB, GATAD1, EZR, STAG3L3, PRSS8, ODC1, GORASP1, AXIN2, IFT140, UBB, BBS2, C12orf75, ZMYND12, GRHL1, CLDN4, PARP4, NUS1, LRPAP1, PHACTR2, PSMA5, DYNC2LI1, GK5, TMEM245, PDCD6IP, GL…	Up-regulated
CHEN_ETV5_TARGETS_SERTOLI_up	0.0147783	0.0472393	-0.448133	-1.62518	38	26	ANGPTL2, CXCL12, IL6, CD53, XIST, MS4A6A, IGFBP4, C1QB, SYCP3, GCG	Down-regulated
CHEN_ETV5_TARGETS_TESTIS_up	0.00272963	0.0121045	0.59695	1.76872	19	24	CDCA7, MKI67, RBL1, CDK2, DDX10, AK4, CCNE2, HELLS, HAUS6, MAD2L1	Up-regulated
CHEN_HOXA5_TARGETS_9HR_up	0.00125484	0.00646018	0.368494	1.51443	11	217	DNAJC2, NUP58, CHAC1, KLF5, SNX5, ZNF451, ZNF107, IFRD1, FAM53C, FNBP4, TAF2, TBC1D31, SFPQ, PIBF1, LRIF1, RIPK2, CCNL1, MTHFD2L, ADNP, NFKBIE, CDK7, TAF1D, RBM39, KIF18A, ZNF267, ALG13, ASNS, WAC, TSC22D2, SPATA5L1, SUPT20H, CLEC4A, EIF5, SRSF10, NOC3L, ETS2, BCL10, ZNF274, RABGGTB, PPWD1, ZNF3, CCNT2, CDKN2AIP, CXCL8, CAB39, CREM, ZZZ3, PSPC1, JUN, PPIG, ZCCHC10, AVL9, INTS6, SREK1, THUMPD2, CL…	Up-regulated
CHEN_HOXA5_TARGETS_9HR_dn	0.0550318	0.137296	0.427376	1.40753	431	40	TMEM97, SKP2, SLC29A1, SYNGR2, AKAP1, ST6GALNAC4, FEN1, HMGB3, DDT, MAT2A, PLPP2, GM2A, SERPINH1, ANP32A, DPAGT1, EHD2, G6PC3, TOMM22, COA3, GLG1, FJX1, TRIM34, AP1S1, SV2A, KDELR1	Up-regulated
CHEN_LIVER_METABOLISM_QTL_CIS_up	0.233673	0.395889	0.304783	1.14889	2042	91	F11R, GLRX2, IARS2, GAS5, DBI, DARS2, TSEN15, INSIG2, SCLY, DUSP12, C1orf53, CYB5R1, UCHL5, TMEM183A, PIGM, SMYD2, MRPS14, SDHC, KLHDC9, C2orf76, B4GALT3, FCER1G	Up-regulated
CHEN_LUNG_CANCER_SURVIVAL_up	0.0728728	0.168984	0.461666	1.4013	536	27	PGAM1, KRT8, HPRT1, KRT19, P4HB, RAB14, HSPA5, GSTP1, ACTB, PLCB3, KRT7, MYCN, ACTG1, PKM	Up-regulated
CHEN_LVAD_SUPPORT_OF_FAILING_HEART_up	0.00168634	0.00803543	-0.343486	-1.66461	1	98	METTL7A, NID1, PDK4, MT2A, ZFP36, MFAP4, KLF9, MT1X, FOSL2, MT1H, MYOT, SNAI2, DIXDC1, ANKRD1, PLPP1, MCL1, MT1E, FHL1, TSC22D3, DNAJB5, MT1M, ANKRD2, CLU, MYOM1, CD163, INSR, CEBPD, CNN1, TXNIP, FKBP5, CALD1, CYP4B1, TIMP3	Down-regulated
CHEN_LVAD_SUPPORT_OF_FAILING_HEART_dn	0.000944733	0.00515849	-0.44994	-1.83446	1	42	PDE4D, JAM2, PTGIS, CXCL12, NRP1, CACNB2, B3GALNT1, IFIT1, KCNJ8, HBB, PDE4B, CD14, GJA1, CCL21, GPR22, TNFSF10	Down-regulated
CHEN_NEUROBLASTOMA_COPY_NUMBER_GAINS_up	0.387589	0.562258	0.311079	1.05321	3097	47	TRIP13, DUT, ACP1, DFFB, PDIA6, RPS7, ODC1, WWOX, PPWD1	Up-regulated
CHEN_PDGF_TARGETS_up	0.17774	0.32695	-0.389178	-1.2469	518	17	CSRNP1, KLF9, SGPL1, MCL1	Down-regulated
CHENG_IMPRINTED_BY_ESTRADIOL_up	0.434901	0.603512	0.267598	1.02199	3837	102	AURKA, ZNF384, GLB1, RAC3, POLR2F, SLC25A19, TFAP2C, CSTF1, IL17RB, FANCF, TMCO1, YBX1, HNRNPL, RB1, DDX50, UBAC2, ZNF467, GOLT1B, HS6ST2, MXI1, NDUFA4L2, TMEM102, VPS13B, METTL3, F7	Up-regulated
CHENG_RESPONSE_TO_NICKEL_ACETATE_up	0.199646	0.35545	0.361178	1.20235	1579	43	HSPE1, TIAL1, GDI2, CD68, PI4K2B, RNF13, HSP90AA1, RABGGTB, ZNF3, JUN, GTF2A2, URGCP, EIF2D, RAB1A, ACTR2, TRAP1	Up-regulated
CHEOK_RESPONSE_TO_HD_MTX_up	0.616318	0.755691	-0.259362	-0.894543	1676	22	IGHA1, CTSG, S100A9, MYLK	Down-regulated
CHEOK_RESPONSE_TO_HD_MTX_dn	0.431589	0.601273	0.362359	1.02181	3084	19	CNOT8, SEC22B, PARG, CRYZ, TGIF1, RALBP1, TOB2, STRAP	Up-regulated
CHEOK_RESPONSE_TO_MERCAPTOPURINE_dn	0.0224955	0.0664186	0.553402	1.57901	160	20	LAPTM4B, CIR1, GSS, SPOCK2, HAT1, TRAC, MICA, RBBP8, PMVK, TK1, SERPING1, CUL4B	Up-regulated
CHEOK_RESPONSE_TO_MERCAPTOPURINE_AND_HD_MTX_dn	0.119012	0.242717	0.447985	1.32735	871	24	SAP18, UCHL3, PFDN6, TGDS, AHCY, MPHOSPH9, AATF, FCER2	Up-regulated
CHEOK_RESPONSE_TO_MERCAPTOPURINE_AND_LD_MTX_dn	0.479111	0.644274	0.346255	0.98796	3428	20	CHD1L, FZD6, TCTN3, CEACAM6, LCN2, CDR2	Up-regulated
CHESLER_BRAIN_HIGHEST_EXPRESSION_up	0.0557962	0.138453	0.426216	1.40371	437	40	GLO1, ATP6V0B, GAS5, UQCRB, HNRNPA2B1, PPID, PSMB5, ZRANB2, ATP11A, HINT1, SP3, ATP13A3	Up-regulated
CHESLER_BRAIN_HIGHEST_GENETIC_VARIANCE_up	0.107166	0.225189	0.411901	1.32064	823	35	PTTG1, HJURP, SC5D, TOX4, PSTK, TULP3, CAP1, C4orf3, RGS19, BCL2A1, CPSF2, ALDH7A1, PHLDA1, PRDX2	Up-regulated
CHESLER_BRAIN_QTL_CIS_up	0.0838395	0.186883	0.363776	1.3157	703	68	PTTG1, HJURP, GLO1, SC5D, FAM32A, TOX4, MRPL48, MAPRE1, SPG21, TCEA1, TUBGCP4, AKAP1, TULP3, CCND1, SRP9, CAP1, C4orf3, POU2F1, PPDPF, CPSF2, ALDH7A1, NCS1, PHLDA1, PRDX2, SCOC, GRIN2B, GRK5	Up-regulated
CHIANG_LIVER_CANCER_SUBCLASS_CTNNB1_up	0.15508	0.296935	0.294661	1.18212	1440	163	EPHB2, MTHFD1, EBPL, CPPED1, SPRYD7, PREB, ACSL5, INSIG2, C1orf112, CDC14B, TMEM64, CTNNBL1, CDK6, CRLS1, TTPA, C1orf53, GRHPR, NEK3, LGR5, SLC2A12, AXIN2, MME, HSDL2, SLC16A1, TSPAN5, CST1, VLDLR, CLDN2, TMEM245, RUNDC3B, BOK, GLYAT, DPP4, SLC5A6, ACSM3, NKD1, ACTN2, FITM2, THBS4, HSD11B1, RAB11FIP2, AQP6	Up-regulated
CHIANG_LIVER_CANCER_SUBCLASS_CTNNB1_dn	0.00142653	0.00709874	-0.330661	-1.75031	0	166	ADAMTS1, RCAN2, BASP1, PTGDS, CCDC80, EFEMP1, CYTIP, LOXL1, KCNT2, C7, CXCL12, GEM, KLRB1, F3, ARRDC4, IGLL3P, CMTM3, EGR2, EGR1, AEBP1, GLIS3, CNGA1, CP, PLTP, PMP22, FGFR2, CHST11, STAT4, LXN, EVI2A, MCC, GPR183, COL5A1, PRG4, BMP2, CDA, MYOM1, GCH1, SRPX, TNFAIP8, TNFSF4, UGCG, ACP5, CCL21, KCTD12, SPHK1, COL1A2, IL7R, ISLR, MXRA5, GPR88, ERICH5, MOXD1, FURIN, INHBE, GLDC, COL1A1, CCL19	Down-regulated
CHIANG_LIVER_CANCER_SUBCLASS_INTERFERON_up	0.197802	0.35361	-0.328067	-1.18976	521	26	KCNT2, KLRB1, PLA2G2A, EVI2A, TDO2, GPR65, CALCRL	Down-regulated
CHIANG_LIVER_CANCER_SUBCLASS_INTERFERON_dn	0.141547	0.276662	0.367453	1.26107	1141	50	MLXIPL, CDC14B, CRLS1, NEK3, LGR5, MME, HSDL2, ONECUT2, SLC5A6, NKD1, ESM1, VWCE	Up-regulated
CHIANG_LIVER_CANCER_SUBCLASS_POLYSOMY7_up	0.637679	0.770067	0.247398	0.909003	5418	76	CHAC1, GARNL3, CYP2A6, PRKAG2, PRSS8, TUBE1, ELAVL1, ICA1, TMEM139, POLD2, CHN2, DHRS1, AZGP1P2, MNS1, COBL, PYGL, TKFC, CLDN14, CLDN3, PILRB, SLC28A1, CLDN15, POR	Up-regulated
CHIANG_LIVER_CANCER_SUBCLASS_POLYSOMY7_dn	0.133479	0.263579	0.440511	1.3052	977	24	CERS6, GPX2, GNL3, PHACTR2, SLC38A1, RCN1, HOMER1, SERPINB1	Up-regulated
CHIANG_LIVER_CANCER_SUBCLASS_PROLIFERATION_up	0.000107101	0.00109167	0.586402	2.36229	0	172	CDCA7, TPX2, ANLN, PTTG1, PLBD1, HJURP, EZH2, PM20D2, CDKN3, PRR11, CDCA5, MKI67, E2F8, CDC6, AURKA, CDK1, CCNA2, RAD51AP1, TTK, UBE2C, TRIP13, CEP55, TOP2A, B4GALT5, KIF23, RFC4, MARCKSL1, HDAC2, FLVCR1, CCNB1, CCNB2, RMI2, MMP9, CENPF, MMP12, PLP2, PRC1, CKAP2L, ZFAS1, KIF20A, CENPK, S100P, BIRC5, TUBA4A, SASS6, DLGAP5, SLC39A10, TAP1, SHCBP1, ELOVL7, DEPDC1, MAPK13, FBXO5, KIF11, HMGB2, LDLRAD…	Up-regulated
CHIANG_LIVER_CANCER_SUBCLASS_PROLIFERATION_dn	0.16641	0.311376	-0.21173	-1.12513	107	174	ABCA8, PDK4, KLF9, TAT, GLYATL1, BAAT, ANGPTL3, CYP2C9, GPT, CPT2, RTP3, AGXT, KCNJ8, RHOB, CYP4F11, ALDH1L1, ECHDC2, WNK3, SLC10A1, CYP1A2, ADH1A, PIPOX, MAT1A, SELENBP1, MASP2, AASS, AR, GPLD1, ACADL, AADAC, MPDZ, NAGS, OTC, RBP5, FMO4, TFR2, EHHADH	Down-regulated
CHIANG_LIVER_CANCER_SUBCLASS_UNANNOTATED_up	0.332017	0.505214	0.290466	1.08191	2857	84	LMO7, HSPD1, SLC22A3, PIK3R1, MARVELD2, UBE2B, B2M, MBNL2, ETS2, PITPNB, HSDL2, NCOA2, CYP2B7P, SMURF1, HGFAC, TMEM178A, ARMC8, ZFAND5, GSDMB, SLX4IP, CDK13	Up-regulated
CHIANG_LIVER_CANCER_SUBCLASS_UNANNOTATED_dn	0.000106428	0.00109167	0.671254	2.71496	0	180	TPX2, ATIC, CDKN3, CD46, STIP1, CDK1, PSMG1, PSMA2, RAD51AP1, NDUFA4, STOML2, TM9SF2, RPA3, C1QBP, SNX7, HSP90AB1, PIGF, LAMTOR5, CCT2, EBPL, UBE2T, MRPL13, SYPL1, RFC4, SNRPD2, XRN2, TSPAN6, NEU1, SLC29A1, FUCA2, CCNB2, GFM2, MRPL39, TPD52L1, DBI, PCNA, NONO, RPS16, RAE1, E2F5, APOO, ATG3, DCUN1D5, PDIA6, RAN, POLE2, SEC11A, HNRNPA0, SEC23B, CCT4, MAPRE1, VBP1, C1orf112, DPCD, ATF1, DNAJA1, MAD2…	Up-regulated
CHIARADONNA_NEOPLASTIC_TRANSFORMATION_CDC25_up	0.0159521	0.0500871	-0.264473	-1.33109	15	121	FGF7, NID1, IL1RL1, LOXL1, LPAR1, PDK4, HAS2, IL6, OSMR, NCAM1, ADAM19, EVL, IGSF10, PHLDB2, PTX3, IL1R1, PLPP3, MGP, CAPN6, FGFR2, LXN, THBS1, TNC, IFI16, SYNPO, APBB1IP, VCAM1, RAMP3	Down-regulated
CHIARADONNA_NEOPLASTIC_TRANSFORMATION_CDC25_dn	0.267814	0.43732	0.280468	1.11164	2457	143	CYP51A1, LYPLA1, CYB5B, EIF4EBP1, ATP6V0B, SLC29A1, CLIC1, ANXA4, ASNS, CSNK2A1, SRI, CYB5R1, TALDO1, SNX10, RNF13, ABCC1, BAIAP2, TSPO, TRAM1, ICA1, ABHD8, ITGB4, CD9, TOB1, TRIB3, PNKD, GSTM1, FXYD5, ALDH2, SLC1A5, S100A13, NFIC, SEMA3C, CD151, ERO1A, FHL2, POLD4, MAP1LC3B, NPPB, CAPG, KLK8, DBNDD2, ACOT7, VAMP5, CARHSP1, MSLN, TRIM47, GALK1, LAMC2	Up-regulated
CHIARADONNA_NEOPLASTIC_TRANSFORMATION_KRAS_up	0.00209644	0.00963063	0.399036	1.56402	18	129	LSM8, E2F8, SLC12A2, AURKA, RBL1, BZW2, FDX1, MRPL18, TOP2A, CKS1B, POLA1, MARCKSL1, ITGA6, PLK4, SLBP, PCNA, SSRP1, DHX9, UBA2, SPP1, PPID, TOP1, ANKH, AHCY, SET, SNU13, ERGIC3, CDC7, ERH, ST6GAL1, PSMA3, CCND1, HMGB3, SEPHS2, RRM1, UHRF1, SMC2, GTF2A2, HPRT1, RASA1, SMS, AREG, NAP1L1, CTSB, ETV4, EREG	Up-regulated
CHIARADONNA_NEOPLASTIC_TRANSFORMATION_KRAS_dn	0.00340522	0.0143275	-0.27681	-1.41529	2	135	GSN, FSTL1, CCDC80, PAPSS2, FBN1, TMEM159, COPZ2, CITED2, AKAP12, CDKL2, FOXP1, CHFR, MFAP5, ITGB5, PLTP, PLAC8, FHL1, PMP22, GAS1, FOS, IL6ST, TCF7L1, ID3, RBMS2, NOTCH1, COL5A1, TNXB	Down-regulated
CHIARADONNA_NEOPLASTIC_TRANSFORMATION_KRAS_CDC25_up	0.185049	0.336805	0.346819	1.20897	1509	55	GGCT, ITGA6, LAPTM4B, PLP2, CLIC1, SPP1, ANKH, EIF2S1, ZNF706, PSMB5, CCND1, TSPO, CD9, TES, RASA1, FXYD5, AREG, CASP3, NGEF, RAD51, SPTSSA, POLD4, CAPG, ACOT7, RAB7A, VAMP5, TGFBI, CTSV	Up-regulated
CHIARADONNA_NEOPLASTIC_TRANSFORMATION_KRAS_CDC25_dn	0.000523286	0.00328159	-0.533886	-2.27463	0	51	NID1, IL1RL1, CCDC80, LOXL1, PDK4, CXCL12, ZFP36, OSMR, IGSF10, PTX3, IL1R1, FOXP1, MEG3, MGP, FGFR2, FOS, STAT3, LXN, FAS, TNC, LOX, VCAM1	Down-regulated
CHIARETTI_ACUTE_LYMPHOBLASTIC_LEUKEMIA_ZAP70_up	0.866411	0.928542	0.210495	0.752233	7224	63	TCF20, STK39, BAIAP2, SPINK1, LRRC15, SF3B3, IL32, ADGRG1, TNFRSF1B, E2F4, N4BP2L2, CKMT2, COA1, PHC2, HMGXB3, PI4KA	Up-regulated
CHIARETTI_T_ALL_REFRACTORY_TO_THERAPY_up	0.319818	0.491527	-0.299233	-1.08519	843	26	CR2, FGFR1, NID2, FHL1, GFI1	Down-regulated
CHIARETTI_T_ALL_RELAPSE_PROGNOSIS_up	0.000282406	0.00200295	0.728879	2.00204	1	17	MELK, USP1, TTK, MYC, DEK, CENPF, HNRNPH1, CDC7	Up-regulated
CHIBA_RESPONSE_TO_TSA_up	0.174268	0.322366	0.373759	1.23095	1367	40	ZDHHC9, SDC4, DNAJB1, PRDX1, LYPLA2, CYP4F2, IFITM3, NIPSNAP1, ANAPC13, BSG, PRKRA, SQSTM1, HADHB, TXNRD1, STAT1	Up-regulated
CHIBA_RESPONSE_TO_TSA_dn	0.0632947	0.151663	0.506528	1.44526	452	20	BRCA2, PTK2, LIG3, HNRNPH1, CEACAM1, CXCL8, TPR, EGFR, ADAM9, DSP	Up-regulated
CHICAS_RB1_TARGETS_CONFLUENT_up	0.0243902	0.0710109	-0.238123	-1.40624	0	535	SFRP1, ADH1B, AFF3, GSN, METTL7A, DOCK10, FCRL5, ABI3BP, CCDC80, RHOJ, ANGPTL2, FRZB, ROR1, LOXL1, PTGIS, CD200, FHOD3, C7, THSD4, PLPPR4, VGLL3, SERPINF1, NLRP1, NR3C2, CPE, LIN7A, MATN2, FBN1, EMP3, PTN, DPF3, CXCL12, MFAP4, CNTN3, CAMK2D, FRY, NRP1, VIM, SCN7A, MGARP, ACTA2, NR2F2, COPZ2, NPTX1, ANO1, MAMLD1, EFEMP2, ADAM19, TOX, EVL, HBD, TP53I3, SLC14A1, CPM, RARRES1, SMPD1, ACTG2, PTX3, NRE…	Down-regulated
CHICAS_RB1_TARGETS_GROWING_up	0.000104188	0.00109167	0.403417	1.66538	0	231	TMEM97, CDCA7, TPX2, EXOSC8, SCD, CERS6, EZH2, CDKN3, SMARCC1, BUB1, CCNA2, RAD51AP1, CACYBP, USP1, TTK, RPA3, TOP2A, GINS2, GINS1, RFC4, CDKN2A, EIF4EBP1, SMC3, NCAPG2, TMPO, DEK, CCNB1, CCNB2, CDC25B, GMPS, CENPF, GTSE1, SSRP1, KIF20A, POLE2, CENPK, ANXA3, PRIM1, SPIN4, DEPDC1, RIF1, SUPT16H, ASNS, FAM72C, STXBP6, PSAT1, CENPH, EZR, MCM3, CDCA8, CDC7, NFXL1, CCNE2, HAUS1, TSPAN5, LRRC15, TPR, H…	Up-regulated
CHICAS_RB1_TARGETS_LOW_SERUM_up	0.000115567	0.00109167	0.496029	1.85439	0	86	CDCA7, RPS21, RPA3, SNORD12C, EIF4EBP1, LSM7, SNRPE, ROMO1, CENPW, SNRPG, MTHFD2L, RPL36A, SNRPB, CKLF, NDUFB2, PET100, RBM39, RPL38, DEPDC1, RIF1, TOMM7, MCM3, WDR76, C4orf48, NDUFA1, COX5B, CCNE2, TMEM258, RPS28, UQCC2, HELLS, COX6B1, NPIPB5, SULF1	Up-regulated
CHICAS_RB1_TARGETS_SENESCENT_up	0.000100381	0.00109167	0.392992	1.68636	0	537	TMEM97, CDCA7, EXOSC8, DSN1, CERS6, EZH2, FERMT1, PRR11, ATAD2, HSPB11, SMARCC1, CDC6, SKP2, MELK, PDP1, CACYBP, USP1, MCUR1, SLC7A1, RPA3, APCDD1L, SNX7, MTHFD1, DGAT2, RFC2, UBE2T, GINS2, FBL, DUT, GINS1, RFC4, CDK2, EIF4EBP1, CEBPZ, SLC5A3, SMC3, NCAPG2, TMPO, DEK, SAC3D1, GMPS, VRK2, MMP9, DHFR, SLBP, SFR1, CSTF3, MMP12, PCNA, RIPK2, CENPK, TIPIN, HACD3, POLD3, SLC25A36, SMAD5, S100PBP, PAICS…	Up-regulated
CHIN_BREAST_CANCER_COPY_NUMBER_up	0.000407443	0.0027339	0.654159	1.97041	2	26	CSE1L, AURKA, TOP2A, MYC, PTK2, E2F5, PAK1, MED1, MYBL2, CCND1, THRA	Up-regulated
CHNG_MULTIPLE_MYELOMA_HYPERPLOID_up	0.00012364	0.00109167	0.745947	2.57412	0	52	RPL21, RPS13, RPLP2, FBL, EIF4A2, RPL35, RPLP1, RPL14, RPS16, RPL18, RPSA, EIF3J, NPM1, RPS23, RPL29, RPL15, RPS9, IMP3, MRPL34, RPS14, RPS3, RPL7A, EEF1G, RPS10P2, RSL24D1, RPS15, RPS17, RPL24, RPS6, RPL4, HNRNPA1, UBA52, EIF3G, RPL35A, RPL27A, RPL13A, NCBP2, USP3, EEF1B2, RPS19, RPL28, RPL32	Up-regulated
CHNG_MULTIPLE_MYELOMA_HYPERPLOID_dn	0.0223404	0.0660944	0.500154	1.55276	167	30	CACYBP, SLBP, SEC23B, RNF187, EMG1, RFWD3, VPS4A, YME1L1, FBXO21, TMED2, NECAP2, UBE2D1, PEX19, COPA, EIF1, SEC31A, EIF4EBP2, USP22, VPS35	Up-regulated
CHO_NR4A1_TARGETS_up	0.211667	0.370458	0.381795	1.20356	1610	32	INSIG1, SLC3A2, ATF4, ASNS, HLCS, CROCCP3, RIPPLY3, EXTL1, NOS1, S100G, CTH, ABCC6, ATF3, ABL2	Up-regulated
CHOI_ATL_CHRONIC_VS_ACUTE_dn	0.00056338	0.00342598	0.695586	1.93481	3	18	SERBP1, GTF3A, HSPD1, PPP1CC, MDH1, UBE2E1, ANAPC16, CMTM6, SUMO1, LRRC8D, CGGBP1, MAT2B, NCOA3	Up-regulated
CHOI_ATL_STAGE_PREDICTOR_up	0.000382458	0.00263541	0.556249	1.82376	2	39	RALA, DUT, R3HDM1, SEC11A, SEC23B, DESI2, SMIM19, HSPA4, CCT3, EIF5, UBE2E1, TSPO, CMTM6, CCDC90B, TARDBP, GORASP2, RRAGC, NAP1L1, PPP2R2A, RBBP4, TTYH2, GMFB, MRFAP1L1	Up-regulated
CHOW_RASSF1_TARGETS_up	0.0945817	0.205165	0.457646	1.36733	692	25	RFC4, INSIG1, LSM3, GNPAT, TTF2, FANCG, PARP2, ALCAM, CHD1, EIF4E, PNPLA6, RSRC2, COX7B	Up-regulated
CHOW_RASSF1_TARGETS_dn	0.00147236	0.00728739	0.586828	1.80905	10	29	PSMG1, PYCR1, CELSR2, RNF114, EBAG9, PPP1CA, HSPA13, POLR2K, LRPAP1, DDB2, LY6E, P4HB, NDUFS8, SNRPD1, EXOSC4, PPIB	Up-regulated
CHUANG_OXIDATIVE_STRESS_RESPONSE_up	0.311052	0.48338	-0.296797	-1.09089	818	27	MT1X, MT1H, FDXR, LIF, EGR1, FAS	Down-regulated
CHUNG_BLISTER_CYTOTOXICITY_up	0.000109926	0.00109167	0.44991	1.76768	0	131	CKS2, BOLA2, PSMB2, CHCHD3, NUDCD3, SDC4, SNX5, RALA, MRPL57, AKR1A1, CPSF3, SLC11A2, GGA2, PBDC1, SNAP47, SMIM12, PSMD13, TBL2, SUPT16H, THYN1, ETFB, ZWILCH, TPI1, BORA, DDB2, FABP5, SOD1, CISD2, MED27, HCFC1R1, PSMD14, TIMM23, MICALL1, IRAK1, FANCL, PPP1R7, SYTL3, TUBB4B, GPR137B, NANS, PSMC1, CTSB, SKA2, TIGIT, CYB5A, ATOX1, AMBRA1	Up-regulated
CHUNG_BLISTER_CYTOTOXICITY_dn	0.519462	0.683362	-0.235088	-0.964334	1080	44	PRKCB, PLCG2, STXBP5, FOXP1, KIAA0513, FBXO38, RGS18, KAT2B, IRAK3, HACD4, BIN2	Down-regulated
CHYLA_CBFA2T3_TARGETS_up	0.382114	0.556781	-0.176824	-1.01876	46	371	F13A1, GRIA3, CSRNP1, ENDOU, GPR171, SLAMF1, KLRB1, PLCG2, ITIH5, KCNIP3, TF, PTGS1, SERPINA3, CTSG, TPM4, STARD8, RNF180, PTPRJ, PPP1R14A, TLE6, MOGAT2, ID1, P2RY14, CD48, H6PD, ARHGDIB, ADGRL4, CYTH4, RHOB, ITM2A, GFI1, TSC22D3, ATP8B4, NRG4, PELI2, BACE1, HK3, MAST4, KLHL5, KLF8, LRP12, ARID5A, ARHGEF6, C1R, CCDC102A, PTGER2, LAPTM5, CDA, ARHGEF3, GPR65, MYCT1, CTSC, SOCS2, GFRA1, AS3MT, HDC, …	Down-regulated
CHYLA_CBFA2T3_TARGETS_dn	0.789348	0.8795	0.209168	0.862643	7572	227	PM20D2, KRTCAP3, KLF5, PTK2, ACP1, SLC29A1, MMP9, TEX264, SLC41A3, SLC11A2, DHTKD1, RNF128, ACOT6, UBLCP1, MARVELD2, PAQR4, YPEL4, C12orf29, FHIT, ASNS, SLC6A20, PIK3R2, GPSM2, RECQL4, SLC38A5, CLDN4, SESN2, ATP7B, PXMP2	Up-regulated
CLASPER_LYMPHATIC_VESSELS_DURING_METASTASIS_up	0.0861948	0.191484	-0.41764	-1.38544	245	19	CD200, TGFB3, ANGPT2, THBS1, TNC, TGFB2, PDGFB, UNC5B, ADM	Down-regulated
CLASPER_LYMPHATIC_VESSELS_DURING_METASTASIS_dn	0.000428266	0.00281213	-0.552315	-2.14034	0	34	LAMA2, JAM2, LOXL1, LPAR1, FBN1, RDX, COL6A2, CDH2, LOX, COL5A1, PCOLCE, COL6A1, COL1A2, EMILIN2, TWIST2	Down-regulated
CLIMENT_BREAST_CANCER_COPY_NUMBER_up	0.362627	0.537922	0.36646	1.07595	2644	23	STK3, MYC, PAK1, EBAG9, CCND1	Up-regulated
COATES_MACROPHAGE_M1_VS_M2_up	0.531564	0.692161	-0.20469	-0.968413	740	84	CFH, SLCO2B1, ABCA9, COLEC12, MAF, DST, P2RY13, SFI1, AXL, RFX3, GJA1, TUBB2B, CAPN5, GNB4, CRIM1, FAM9B, HDDC3, TXNIP, CNRIP1, CXCR4, FILIP1L, CXCL14	Down-regulated
COATES_MACROPHAGE_M1_VS_M2_dn	0.917429	0.954072	0.194723	0.717403	7821	77	SCD, MGST2, CRIPT, HSPA1A, AK4, MYO1F, QRICH1, HILPDA, HSPA1B, AKR1E2, TJP2, PKDCC, CD24, F7, ERO1A, PRDX2, UCHL1	Up-regulated
COLDREN_GEFITINIB_RESISTANCE_up	0.00560944	0.0216069	0.428547	1.58601	47	80	SLC7A1, ARL3, NAA10, BMS1, NOL8, GAS5, PRELID1, PPIF, UBA2, C20orf27, PDHA1, ALDH1B1, UBE2M, POLRMT, TIMM50, PCGF6, SOX12, NSMAF, TRAF5, SUPV3L1, SRRT, RAD50, COX15, NAP1L1, ACTR1A, IDE, CTPS1, FSD1L, BORCS7, TUB, MFSD12, UCHL1, RABEPK	Up-regulated
COLDREN_GEFITINIB_RESISTANCE_dn	0.00461168	0.0183788	0.348177	1.42823	43	213	TMC5, MACC1, ADK, MAL2, CDH1, ANKRD22, LMO7, RNF114, CDH3, ERBB3, STK39, TMEM123, PRRG2, EPPK1, SMAGP, MAPK13, LSR, AP1M2, WEE1, SMIM22, PRSS8, SLC2A12, SLC35A3, CYP2J2, EHF, STARD10, CNKSR1, GRHL1, RAB25, TMEM45B, FAM110A, CLDN4, CAB39, ANXA9, GPR160, HS3ST1, TMEM30B, B3GNT3, MYO6, PRSS22, ZIK1, ZNF91, GALNT3, TACSTD2, ZNF681, HMGCL, KRT15, PRRG4, KRT19, TMEM125, IRF6, TJP2, SH3BGRL2, MFSD6, ZNF…	Up-regulated
COLIN_PILOCYTIC_ASTROCYTOMA_VS_GLIOBLASTOMA_up	0.0012848	0.00656373	-0.485775	-1.88249	2	34	SCRG1, ANGPTL2, CPE, PDZD2, TF, SERPINA3, HTRA1, PLA2G2A, RASSF2, TSPAN7	Down-regulated
COLIN_PILOCYTIC_ASTROCYTOMA_VS_GLIOBLASTOMA_dn	0.0773272	0.176819	0.453367	1.3882	573	28	TFRC, TRIM24, SPP1, CTNNB1, CSNK1A1, ANXA2, CHI3L1, EGFR, SQSTM1, SLC30A9, TXNRD1, FN1, TGFBI, POLR2C	Up-regulated
COLINA_TARGETS_OF_4EBP1_AND_4EBP2_up	0.000203046	0.00155252	0.356617	1.50632	1	346	TMEM97, TPX2, ANLN, PLK1, EXOSC8, CDK8, DIAPH3, DDAH1, PERP, NDC1, MELK, SLC12A2, PON2, CCNA2, DNAJC15, TTK, PARP12, TOP2A, MPP6, SDC4, UBE2T, POLA1, SNRPE, TSPAN6, DBF4, SLC29A1, CCNB1, MMACHC, CDC25B, NUDT5, XPO1, TSPAN17, ACSL5, KIF20A, RNF128, CENPK, DNAJC19, BIRC5, LGALS8, SUB1, HNRNPR, UBQLN1, NACC1, DLGAP5, UPF3B, B2M, PCBD2, CHRAC1, ESPL1, FBXO5, PNP, CENPH, TM4SF1, HAT1, RFX5, TACC3, MRP…	Up-regulated
COLLER_MYC_TARGETS_up	0.000137099	0.00109376	0.793811	2.33068	0	23	CKS2, TFRC, C1QBP, FBL, CEBPZ, HSPD1, GRPEL1, HDGF, PPIF, EIF5A, ASS1, POLR2H, NCL, AHCY, AK4, ODC1, SLC16A1, FABP5, G0S2	Up-regulated
COLLIS_PRKDC_SUBSTRATES_up	0.0961373	0.207561	0.523642	1.39114	671	15	MYC, C1D, PARP1, HSP90AA1, XRCC4, POU2F1, WRN, RPA1, SP1, SRF	Up-regulated
CONCANNON_APOPTOSIS_BY_EPOXOMICIN_up	0.0351534	0.0954075	0.313719	1.29651	337	233	HSPH1, SLC7A5, STIP1, DNAJC2, UBFD1, SLC7A1, HSPA9, IFRD1, DNAJB1, GLRX3, ORC3, KCTD20, SLC3A2, LGALS8, TUBA4A, PSMD11, TMF1, YKT6, PSMD13, EPCAM, STX16, RAB21, SPP1, HSPA1A, PHKG2, TTC1, HSPA4, DAP3, CYB5R1, EIF5, UBE2H, CYP4F2, SPATA2, SLC38A6, CCNT2, ADRM1, GLS, NSFL1C, CREM, GDF7, DNAJB6, PSMA5, ZFR, POLR3C, JUN, SYNJ2, ANXA2, PHLDA2, N4BP2L2, UBR4, BAK1, MEST, SLCO3A1, EPB41, CEBPB, NQO1, SR…	Up-regulated
CONCANNON_APOPTOSIS_BY_EPOXOMICIN_dn	0.000107619	0.00109167	0.423879	1.70052	0	163	PLK1, PTTG1, MKI67, BUB1, AURKA, CDK1, CCNA2, UBE2C, TFRC, RPA3, TOP2A, MYC, KIF23, BCL11A, LSM7, INSIG1, LAGE3, MARCKSL1, SPC25, DHFR, DBI, NDUFB6, STMN1, NDUFA2, BIRC5, SNRPG, MYB, DLGAP5, AKAP1, AK4, ESPL1, HMGB2, NFE2L3, DOK4, RPARP-AS1, CETN3, DACH1, GTF2H5, LSM2, ICA1, FABP5, CDC20, ACYP1, TMSB10, CMC4, SPRY2, NHP2, LDOC1, MAD2L1, DNPH1, GM2A	Up-regulated
CONRAD_STEM_CELL_up	0.222463	0.384672	0.36208	1.18714	1744	39	MYCBP, KLF5, MYC, TERF1, MYBL2, HSPA4, TTLL4, POU5F1, CD9	Up-regulated
CORRE_MULTIPLE_MYELOMA_up	0.0135571	0.0438535	-0.319128	-1.46273	20	71	RHOJ, KCNT2, PTGIS, CD200, NLRP1, RGS4, ANKRD1, SCG2, ATXN1, PTPRR, FAM155A, MYCT1, CSGALNACT1, MAFF, ZNF582-AS1, HGD, TNFSF4, ITIH4, AADAC, USP53	Down-regulated
CORRE_MULTIPLE_MYELOMA_dn	0.00107124	0.00567423	-0.401604	-1.73848	1	54	LAMA2, LPAR1, LIN7A, EYA2, CXCL12, SETBP1, COLEC12, MAF, IGF1, OLFML3, CH25H, GAS1, FOS, TCEA3, LAPTM5, SELENBP1, MEOX2, MAMDC2, NLGN4X, SLC1A3, POTEKP	Down-regulated
COULOUARN_TEMPORAL_TGFB1_SIGNATURE_up	0.293402	0.466022	0.287563	1.10366	2605	105	MAL2, AMD1, LMO7, ITGA6, SLC29A1, EMD, GTSE1, CHMP4C, TEX10, TMX2, HMGXB4, IDI1, ASNS, HSPA4, CPD, CLDN4, MOK, SQLE, ERGIC1, ZCCHC10, TNFRSF1B, SPATS2L, FOXQ1, NAB1, SOX9, CXCL10, LGMN, NCS1, LPGAT1, CXCL1, TGIF1, SMURF2, PDCD10, PMEPA1, SOX4, PLEKHA3, PIGH, RBM47	Up-regulated
COULOUARN_TEMPORAL_TGFB1_SIGNATURE_dn	0.194884	0.349865	0.2953	1.16145	1774	132	CYP51A1, RSC1A1, SLC25A13, DGAT2, GSTO1, MOSPD3, DDX28, DEPDC7, DHCR7, MSMO1, FARSB, GSS, TSC22D2, GRHPR, CCDC85A, UBE2L6, GK, TNK2, MAPRE3, SERINC2, TRIB3, CXXC5, SPPL3, HMGCS1, OSGIN1, ARID5B, IDH1, SH3BP2, DHRS1, NDEL1, HAMP, HCRT, ALCAM, IGFBP3	Up-regulated
COWLING_MYCN_TARGETS_up	0.000472367	0.00302828	-0.494061	-2.01435	0	42	GRIA3, DSEL, GREM1, COPZ2, FBLN5, COX7A1, TAGLN, CPXM2, PRR5L, TK2, PBX3, MYL5, SAMD9L, STMN2, SHOX2, CNN1, LBH, ALPK2, ANO4	Down-regulated
CREIGHTON_AKT1_SIGNALING_VIA_MTOR_up	0.62135	0.759245	0.286291	0.896319	4702	31	NEU1, UBE2M, KCTD5, PMPCA, BSG, HNRNPAB, CLDN3, POR, PRKCD, CDC34, CDK16, GPX4, TOLLIP, ADIPOR1, AKT1, SPINT1, CYB561, LASP1	Up-regulated
CREIGHTON_AKT1_SIGNALING_VIA_MTOR_dn	0.000411297	0.00274775	0.649278	1.90632	2	23	ATP6V0B, DHCR7, ATP6V0C, YWHAB, PPP4C, KRT8, ATP6V1F, ALDOA, MIF, PAFAH1B3, CTSA, PFKL, TUBB4B	Up-regulated
CREIGHTON_ENDOCRINE_THERAPY_RESISTANCE_1_up	0.000100492	0.00109167	0.382104	1.63615	0	503	TPX2, PTTG1, ATIC, CDKN3, PRR11, ARMC10, RRS1, PA2G4, NOB1, ADK, WDR4, PVT1, BZW2, UBE2C, SLC7A1, MRPL52, MTHFD1, DCTPP1, UBE2T, DAZAP1, MYC, FBL, DUT, GINS1, GPATCH4, SNRPD2, CDK2, SNRPE, GTF3A, SLC29A1, ESD, DDX27, CCNB2, CDC25B, RMI2, TPD52L1, GAS5, CENPF, CELSR2, COMMD6, PLP2, TFAP2C, SMYD3, RSRC1, CDH3, ITGA2, RIPK2, DHTKD1, KIF20A, CMSS1, HNRNPA0, TEX10, NAT10, FARSB, EIF3M, RPS23, PAICS, M…	Up-regulated
CREIGHTON_ENDOCRINE_THERAPY_RESISTANCE_2_up	0.766482	0.863676	0.212019	0.902114	7591	417	STIL, STOX1, PPIL6, PLK4, KIF9, DHFR, TBC1D31, REEP1, CDKL3, STRBP, TRIM24, SHANK2, DNAI1, CACUL1, CETN2, SRP68, IQCK, RPGRIP1L, PAQR4, C9orf116, DPCD, ZNFX1, TMEM231, PSME2, RHEBL1, CEP41, HEATR3, SRI, VDAC3, ERCC4, HSP90AA1, CCDC191, TMEM67, NUDC, MOK, CEP120, TCF7, ZHX3, CEP295, ZC2HC1C, SUZ12, KLHDC9, CYTH3, STAG3L1, RMI1, RABL2B, CEP350, SLC25A14, AZU1, STPG1, ARNTL2, PHOSPHO2, TUBB4B, RAB15…	Up-regulated
CREIGHTON_ENDOCRINE_THERAPY_RESISTANCE_4_up	0.000821018	0.00461998	0.353207	1.47727	7	291	PARD6B, SKP2, MDH2, PSMG1, C2orf49, POLR1E, POLR1D, LYAR, SRSF7, MYC, GSTO1, SLC25A22, TIMM9, TSPAN6, LAGE3, CCNB1, EHMT2, CELSR2, DPY30, SFPQ, EMC8, TFAP2C, DHCR7, ITGA2, DHTKD1, KIF20A, PIK3R1, MYB, COX6C, APEX1, METTL5, IL17RB, TAF1D, PSMF1, COX6CP1, ASS1, PCBD2, MAD2L2, AK4, NPEPPS, RPP25L, FRK, HSPA4, SRI, GNPDA1, RFX5, SLC19A2, TMEM167A, RRP1B, C12orf75, STC1, RUVBL2, PARP4, AMFR, GLS, SGK3…	Up-regulated
CREIGHTON_ENDOCRINE_THERAPY_RESISTANCE_5_up	0.492551	0.656972	0.234576	1.00193	4892	455	MIPEP, PLBD1, SLC12A2, SCCPDH, PDP1, TMEM41A, TMEM41B, MAL2, SC5D, SIM2, HACD2, LGALSL, DBI, REEP1, ZDHHC4, SMYD3, SLC11A2, MTURN, SHANK2, CDH3, HACD3, ANXA3, OSBPL2, TMF1, PSMD6, PLEKHS1, CLIC1, BCDIN3D, RAB2A, B3GNT2, NFAT5, EZR, PI4K2B, CPNE3, MIOS, NUDT4, FBP1, GORASP1, THOC2, TMEM45B, ENPP1, CLDN4, TMPRSS2, DCAF5, CAB39, NCEH1, PIP4K2C, LRPAP1, CTNNB1, ABHD17C, RAP1GAP2, MFAP3L, AREL1, GPR16…	Up-regulated
CROMER_METASTASIS_up	0.117584	0.240766	0.349775	1.27057	992	70	CD46, TMEM63A, DEK, XPO1, TFAP2C, SLC25A36, TMEM123, PARP1, PPID, BUB3, CXCL8, PPIH, CTNNB1, GANAB, PSMB9, PLCG1, UBXN4	Up-regulated
CROMER_METASTASIS_dn	0.00106257	0.00565401	0.467055	1.70885	8	74	PA2G4, KLF5, SDC4, CEBPZ, NOP16, CUL1, GJB3, ALDH4A1, TUBA4A, PPP4C, S100A11, UBE2M, VDAC3, ALDOA, JUP, PRSS3, TMEM183A, BAIAP2, TTLL12, DDB2, ITGB4, UBE3C, PHLDA2, TRIM16, SERPINB5, TRIM29, GSTP1, DUSP7, FXYD3, LAD1, FLAD1, TNNT3, PLEC	Up-regulated
CROMER_TUMORIGENESIS_up	0.21052	0.368878	0.336244	1.18274	1732	58	MMP9, MMP12, SPP1, ODC1, CXCL8, LRRC15, MMP11, MMP3, DEFB4A, G0S2, COL11A1, IL1B, OASL, MMP1, PLOD3, PFN2, FAP, IFI6, UCHL1, CXCL1	Up-regulated
CROMER_TUMORIGENESIS_dn	0.0111505	0.0372737	-0.376068	-1.57797	21	48	SFRP1, PTGDS, PTN, MUC4, MYH11, PLA2G2A, FHL1, CLU, ECM1, SELENBP1, EMP1, TFF3, ADH7	Down-regulated
CROONQUIST_IL6_DEPRIVATION_up	0.138544	0.271948	-0.416741	-1.3133	412	16	RAPGEF3, TBC1D9, FCGRT, BMP2, PDE1A	Down-regulated
CROONQUIST_IL6_DEPRIVATION_dn	0.000114338	0.00109167	0.66785	2.51943	0	92	CKS2, TPX2, PLK1, PTTG1, CDKN3, KPNA2, MKI67, CDC6, SKP2, BUB1, STIL, AURKA, CDK1, CCNA2, UBE2C, TRIP13, GGH, BRCA1, TOP2A, DUT, CKS1B, GINS1, SPC25, PLK4, CCNB1, CCNB2, GMPS, DHFR, CHEK1, PCNA, CCNF, STMN1, POLE2, SEPHS1, SPP1, DTYMK, RFC3, KIF11, MYBL2, HMGB2, WEE1, HMGA1, MCM3, KIF2C, CCNE2	Up-regulated
CROONQUIST_NRAS_SIGNALING_up	0.369929	0.544504	-0.262889	-1.04515	838	37	TBC1D9, JCHAIN, CD48, PLPP1, CCR2, LGALS1, CYBB, CCL5	Down-regulated
CROONQUIST_NRAS_SIGNALING_dn	0.00011909	0.00109167	0.722004	2.61133	0	68	TPX2, PLK1, CSE1L, PTTG1, CDKN3, MKI67, CDC6, STIL, AURKA, CDK1, CCNA2, UBE2C, TRIP13, TOP2A, DUT, CKS1B, GINS1, SPC25, PLK4, CCNB1, CCNB2, CHEK1, PCNA, STMN1, CDC25C, POLD3, RAD51C, RFC3, KIF11, MYBL2, HMGB2, WEE1, HMGA1, MCM3, EIF5, KIF2C	Up-regulated
CROONQUIST_NRAS_VS_STROMAL_STIMULATION_up	0.0254866	0.0731844	-0.368896	-1.47228	54	39	TBC1D9, JCHAIN, PLPP1, RAB4B, CCR2, CYBB, MCC, MC1R, KCNN4, ACP5, SPI1, CX3CR1	Down-regulated
CROONQUIST_NRAS_VS_STROMAL_STIMULATION_dn	0.00388883	0.0158972	0.425118	1.6025	33	91	TPX2, PTTG1, EZH2, CDKN3, MKI67, CDC6, AURKA, CDK1, CCNA2, RAD51AP1, UBE2C, CKS1B, CCNB1, CCNB2, CCNF, STMN1, RPS4Y1, DLGAP5, TROAP, SFTPB, MCM3, KIF2C, ARHGAP11A, RECQL4, CDC20, JUN, MCM7, NOTCH3, SULF1, TRAIP, CDC45	Up-regulated
CROONQUIST_STROMAL_STIMULATION_up	0.00574713	0.022045	-0.377251	-1.61907	10	52	BASP1, GUCY1A2, ACTA2, IL6, ID1, TSC22D3, FOSB, IER2, FOS, LOX, SPARC, NR4A2, IGFBP4, COL6A1, SLC25A4, COL1A2, IER3, DUSP1, TPM2, CCL3	Down-regulated
CUI_GLUCOSE_DEPRIVATION_up	0.000121477	0.00109167	0.535014	1.88192	0	58	ANLN, OCLN, CDK1, TFRC, PDIA4, PYCR1, NEU1, PDIA6, PREB, SLC3A2, ASNS, DNAJC3, CANX, GFPT1, NDUFB3, KDELR2, SEPHS2, SGK3, CALR, FKBP2, ART3, PPIB, SLC33A1, CBR3, TRPS1, DNAJB11, PDIA3, TXNRD1, TGIF1	Up-regulated
CUI_TCF21_TARGETS_up	0.0123239	0.0405932	-0.406047	-1.60047	27	36	CFH, SERPINF1, PTN, NCAM1, PHGDH, MEG3, COL6A2, CYP7B1, HOMER2, COL6A1, HMMR, DCN, CDH6, IGFBP2, ISLR	Down-regulated
CUI_TCF21_TARGETS_dn	0.44843	0.616162	0.321675	1.01404	3412	32	SCD, SLC12A2, HSPA1A, PARP4, HSPA1B, RHPN1, SH3BGRL2, ART3	Up-regulated
CUI_TCF21_TARGETS_2_up	0.000201959	0.00154772	0.348212	1.48077	1	407	TMEM97, CDCA7, TPX2, KRT18, PTTG1, EXOSC8, ATIC, HJURP, PA2G4, CDCA5, SKA3, SKP2, CHAF1B, CDK1, CCNA2, BZW2, UBE2C, KLF5, MPP6, PPA1, DCTPP1, UBE2T, CKS1B, PYCR1, CCNB2, RAD18, PPP1R14B, EMC8, SGTA, MRTO4, STMN1, TMEM238, CENPK, RPSA, CDC25C, CKAP5, KRT8, RANBP1, C1orf112, APEX1, MDK, HNRNPR, SRM, LSM3, SNRPB, HM13, PRIM1, HMGXB4, NME1, RPS9, TMEM231, EMG1, DTYMK, RPL12, LSR, RHEBL1, RFC3, ESPL1,…	Up-regulated
DACOSTA_ERCC3_ALLELE_XPCS_VS_TTD_up	0.139977	0.274176	-0.341891	-1.26527	360	28	CXCL12, GAGE12F, PTX3, RASSF2, FOS, RIMS2, EPB41L3, ANPEP	Down-regulated
DACOSTA_ERCC3_ALLELE_XPCS_VS_TTD_dn	0.00642398	0.0239974	-0.435155	-1.68632	14	34	SSBP2, ROR1, PTN, HAS2, PPP2R3A, PLPP3, ENPP2, DLC1, CNN1, COL1A2, PDGFRL, CXCR4, GULP1	Down-regulated
DACOSTA_UV_RESPONSE_VIA_ERCC3_up	0.000102407	0.00109167	0.405938	1.70196	0	305	TFAM, SAP18, CDC6, BOLA2, MVD, RFC2, CYB5B, RSL1D1, CDK2, EIF4EBP1, NEU1, SAC3D1, PCNA, SNRPA, DGAT1, E2F1, ZNHIT1, TUBA4A, NFKBIE, ZKSCAN1, GDI2, PAQR4, MDK, YKT6, PPIF, STX16, STK25, TERF2, RPS15A, HSPA1A, ALDH1B1, PNP, MYBL2, RPUSD2, ATP6V1F, CYB5R1, ERGIC3, ALDOA, FKBP1A, GRHPR, UBA1, PPP1CA, BAD, PAFAH1B3, TEX30, ARPC4, SULT1A2, CCNE2, FEN1, UROD, AP2S1, PQBP1, ECI1, AGPAT2, GLS, CREM, TRIM1…	Up-regulated
DACOSTA_UV_RESPONSE_VIA_ERCC3_COMMON_up	0.131551	0.261373	0.343887	1.25186	1111	71	TFAM, CDC6, RSL1D1, CBR1, NEU1, PCNA, DGAT1, TUBA4A, SRM, CCNE2, NSUN5P2, ACYP1, TOB1, SLC30A3, ERCC5, TUBB4B	Up-regulated
DACOSTA_UV_RESPONSE_VIA_ERCC3_COMMON_dn	0.000100695	0.00109167	0.359973	1.53682	0	450	CERS6, CDK8, FNBP1L, STIL, MELK, STAM, PRIM2, BRCA1, ORC5, SLC7A1, SLC25A13, TOP2A, MPP6, STK3, SSBP1, SRSF7, MYC, KIF23, GINS1, PTK2, DNMBP, KRIT1, KIF20B, TUBGCP3, GMPS, LRPPRC, CENPF, UTP18, WDR43, XPO1, CUL1, USP12, FUBP1, OXSR1, PIBF1, GTF2F2, R3HDM1, STK39, PHIP, E2F3, NAA20, DCUN1D4, CKAP5, UCK2, ORC2, OGT, HMGXB4, LARP4, NEDD4, PUM3, RBM39, PARD3, ENC1, ZMYND8, BAZ1A, NPEPPS, CLEC16A, NUP…	Up-regulated
DACOSTA_UV_RESPONSE_VIA_ERCC3_TTD_up	0.00343137	0.0144111	0.470516	1.64016	27	55	MVD, SMARCD2, MDK, PPIF, STX16, STK25, MYBL2, RPUSD2, UBA1, BAD, ARPC4, GLS, CALR, FKBP2, TRIM21, BSG, BAK1, CBX2, PDAP1, MRPL28, GNL1, PLCB3, ADO, PLXNA3	Up-regulated
DACOSTA_UV_RESPONSE_VIA_ERCC3_TTD_dn	0.31878	0.491166	-0.225953	-1.05976	459	81	ROR1, LPAR1, HAS2, SMAD7, DST, PLCE1, ZEB2, PTPRM, PLPP3, CTIF, CDC42BPA, ATXN1, FAM193A, GPR176, KLHL20, FAM155A	Down-regulated
DACOSTA_UV_RESPONSE_VIA_ERCC3_XPCS_up	0.015013	0.0476913	0.546546	1.61938	109	24	ZKSCAN1, TERF2, ALDH1B1, RPUSD2, CCNT2, GLS, TRIM21, FRAT2, IRF1, CASP3, ADO, CTH	Up-regulated
DACOSTA_UV_RESPONSE_VIA_ERCC3_XPCS_dn	0.256374	0.423352	0.305158	1.13299	2201	82	DLEU2, ABCE1, CUL2, TERF1, AGFG1, E2F5, DOCK9, TSC22D2, ASXL1, ATP2C1, UBXN7, VLDLR, MPHOSPH9, HERC4, WWP1, AVL9, MTAP, PHF14, NFATC3, TGFBR3, RB1CC1, HOXB2, VPS13B, BMPR1A, PTEN, GRK5, RALGAPB, RANBP2, SP100, ACAP2, DUSP5, PIK3C2A, EIF3A	Up-regulated
DAIRKEE_CANCER_PRONE_RESPONSE_BPA_up	0.000123946	0.00109167	0.651832	2.23703	0	50	CSE1L, EIF2S2, PSMA2, GOT2, SORD, C1QBP, MTHFD1, TOP2A, MYC, MOGS, PPM1G, GTF3A, ERBB3, NUP93, PIK3R1, FARSB, UCK2, GSPT1, RANBP1, NDUFB2, DHX15, RB1	Up-regulated
DAIRKEE_CANCER_PRONE_RESPONSE_BPA_E2_up	0.000112246	0.00109167	0.470024	1.81471	0	112	PSMB2, NEIL1, FBL, EIF4EBP1, IFRD1, NOP16, LBR, TXN, SFPQ, PLP2, VBP1, EBNA1BP2, RPL29, RPL15, USP10, UQCRH, POLR2H, ATF4, SUPT16H, EIF2S1, COX8A, HMGB2, HMGA1, PSMA6, AP3S1, TCP1, TKT, ANP32B, MARK2, DOCK2, RPS6, EIF4G2, RPL4, SRSF3, MCM7, BARD1, ENAH, DDC, EIF4A1, POLD2, EIF4B, PDPK1, PPP2R2A, PPP2CA, RAB14, HDAC11, GAPDH, KHSRP, CTPS1, S100A4, PGAM2, KPNB1, EEF1D, MKNK1	Up-regulated
DAIRKEE_CANCER_PRONE_RESPONSE_E2_up	0.694463	0.813911	0.276709	0.847276	5154	28	DUT, EIF4A2, NDUFB6, SLC1A5, EML2, MYLPF, IDH3A, ATP2A1, PPFIA4, PPP2CB, LMNB1	Up-regulated
DALESSIO_TSA_RESPONSE_up	0.0171963	0.0533019	-0.454119	-1.6111	45	24	HSPB8, GAGE12G, GAGE12F, FOSL2, NTS, FOS, LGALS1, CLU	Down-regulated
DANG_MYC_TARGETS_up	0.000110619	0.00109167	0.686775	2.68478	0	126	RPL13, CKS2, EXOSC8, PA2G4, DKC1, HSPE1, GNL3, PSMG1, RPS13, UBE2C, TFRC, RPS5, CCT5, MTHFD1, RFC2, SRSF7, HSPA9, CBX3, PRDX3, CEBPZ, PYCR1, HSPD1, DDX10, CCNB1, PPAT, EIF3C, TXN, SRSF2, DBI, DPY30, PCNA, RPS16, MRTO4, PPIA, E2F1, AIMP2, CDC25C, E2F3, SLC25A3, NPM1, RPL27, PHB, APEX1, SRM, SNRPB, RPL5, HNRNPA2B1, NME1, PPID, TOP1, AKAP1, NCL, EIF2S1, NUP155, SLC39A6, HSPA4, HMGA1, RPS20, PREP, OD…	Up-regulated
DANG_MYC_TARGETS_dn	0.193883	0.348611	0.394282	1.22407	1457	30	DLEU2, MYC, TMEM126A, VHL, ARPC4, GTF2H2, LAMP1, NDRG1, SFXN3, ITGB1	Up-regulated
DANG_REGULATED_BY_MYC_up	0.000119261	0.00109167	0.587734	2.11939	0	67	TFDP1, SLC7A5, UMPS, VDAC1, UBE2C, TFRC, SRSF7, SNRPD2, TARBP1, TXN, SRSF2, SLC25A3, UCK2, SRM, SNRPB, VRK1, TOP1, WDR3, RRP9, UXT, TXNL4A, SLC16A1, RUVBL2, THRA, SRSF1, SEPHS2, UNC119, HOMER1, YWHAE, TBL3, SUMO2, WDR12, CLPB, SMN1, THOP1, UCHL1, TYMS, ZNF239, TXNRD1, TIMM23B	Up-regulated
DANG_REGULATED_BY_MYC_dn	0.539317	0.69821	0.236909	0.980241	5191	238	PERP, CHAF1B, DLEU2, POM121, MYC, TMEM126A, PYCR1, CD47, CKAP2L, SERINC3, RPS23, RAB2A, VHL, ANXA4, MLF2, UBE2V1, UBE2L3, CANX, HNRNPH1, ARPC4, CPD, PAK2, RRM2B, CCND1, TSPO, RB1, SDCBP, SUMO1, DDB2, TRIM31, YME1L1, VLDLR, GLYR1, CTBS, CASP1, RAB10, LAMP2, SP3, KIF14, GTF2H2, LAMP1, VAMP3, INHBA, GM2A, ITGAL, CSK, PLAUR, DGKZ, SERPINB1, SLC4A1, RPS12, CASP3, PDGFRB, CTSB, NDRG1, PEX19, CXCL10, IS…	Up-regulated
DARWICHE_PAPILLOMA_PROGRESSION_RISK_up	0.972739	0.984719	-0.157127	-0.72988	1462	76	AFF3, MUC2, TTN	Down-regulated
DARWICHE_PAPILLOMA_RISK_HIGH_up	0.00130904	0.00668018	0.393725	1.55893	11	142	CACYBP, UBE2C, HBS1L, HSPD1, ESD, TXN, PDCD5, SFPQ, RPL39, LRIF1, CCT4, PGAM1, S100A11, SRM, STX16, VHL, TMEM248, SLPI, NCL, PRRC1, COX5B, ELAVL1, CSPP1, SARAF, ENO1, FOXL2, IFITM3, SRSF1, KPRP, SSU72, CXCL16, LY6E, PFKL, ENAH, NHP2, IL1B, EML4, CHI3L1, EEF1B2, KLK9, RPS3A, HAMP, LTB4R, FAM162A, DYNLL1, IDE, SFN, SUN1, NEK4, CX3CL1, CALML5, KLF13, RPS6KA4, EEF1D, GDF5, LDHA, SPIC	Up-regulated
DARWICHE_PAPILLOMA_RISK_HIGH_dn	0.648799	0.778525	0.229393	0.923726	6051	171	PDP2, PVT1, LYAR, GID8, ZNF830, YWHAB, UCK2, LRRC58, SPP1, EIF5A, C14orf119, ASNS, YTHDF2, DENR, MSI1, TCP1, BAIAP2, DOK4, SRSF1, TTLL11, SOD1, IRAK1, GTF2E2, RNF181, TNP2, C11orf58, RNF26, PABPC4, FBRSL1, BCL2A1, SAR1A, CPA5, NBN, ANP32A, LGMN, AMBRA1, QPRT, GTF2I, ANKEF1, RTN4R, SMU1, RBM12, TTC9, CALM2, RNF19A, MAPK8IP3, ARMC9, SLC35B1, SLC39A13, NUF2, IFT20, SRF, CTSV, MAP2K5, MYO1A, MYCN, ST…	Up-regulated
DARWICHE_PAPILLOMA_RISK_LOW_up	0.00259151	0.0115589	0.374207	1.49506	23	155	CACYBP, UBE2C, HBS1L, HSPD1, ESD, TXN, PDCD5, SFPQ, RPL39, LRIF1, PGAM1, YWHAB, S100A11, UCK2, SRM, STX16, LRRC58, TMEM248, SLPI, EIF5A, NCL, PRRC1, TCP1, COX5B, ELAVL1, SARAF, ENO1, IFITM3, SRSF1, KPRP, SSU72, LY6E, PFKL, ENAH, NHP2, IL1B, CHI3L1, EEF1B2, KLK9, RPS3A, HAMP, LTB4R, FAM162A, DYNLL1, SAR1A, IDE, SFN, NEK4, CX3CL1, CALML5, RPS6KA4, EEF1D, GDF5, LDHA, SPIC, RBM12	Up-regulated
DARWICHE_PAPILLOMA_RISK_LOW_dn	0.569474	0.720531	0.23925	0.957881	5286	159	PDP2, PVT1, LYAR, GID8, ZNF830, CCT4, VHL, SPP1, C14orf119, ASNS, YTHDF2, DENR, MSI1, BAIAP2, DOK4, CSPP1, FOXL2, SRSF1, TTLL11, SOD1, CXCL16, IRAK1, GTF2E2, RNF181, TNP2, C11orf58, RNF26, EML4, PABPC4, FBRSL1, BCL2A1, CPA5, NBN, ANP32A, LGMN, AMBRA1, QPRT, SUN1, GTF2I, ANKEF1, RTN4R, KLF13, SMU1, TTC9, CALM2, RNF19A, MAPK8IP3, SLC39A13, NUF2, IFT20, SRF, CTSV, MAP2K5, MYO1A, RAB2B, MYCN, STRAP, …	Up-regulated
DARWICHE_SKIN_TUMOR_PROMOTER_up	0.0224756	0.0664026	0.352332	1.38873	204	135	UBE2C, HBS1L, ESD, PDCD5, LRIF1, CCT4, PGAM1, YWHAB, SRM, STX16, SPP1, TMEM248, SLPI, NCL, TCP1, COX5B, ELAVL1, BAIAP2, ENO1, FOXL2, IFITM3, SRSF1, TTLL11, SOD1, SSU72, CXCL16, LY6E, IRAK1, PFKL, RNF181, TNP2, ENAH, NHP2, EML4, CHI3L1, EEF1B2, KLK9, RPS3A, HAMP, LTB4R, DYNLL1, IDE, CPA5, SUN1, CX3CL1, KLF13, RPS6KA4, SMU1, LDHA, SPIC, RBM12	Up-regulated
DARWICHE_SKIN_TUMOR_PROMOTER_dn	0.248827	0.413932	0.27643	1.11646	2332	178	PDP2, CACYBP, PVT1, LYAR, GID8, HSPD1, TXN, ZNF830, SFPQ, RPL39, S100A11, UCK2, VHL, LRRC58, EIF5A, C14orf119, ASNS, YTHDF2, PRRC1, DENR, MSI1, DOK4, CSPP1, SARAF, SRSF1, KPRP, GTF2E2, IL1B, C11orf58, RNF26, PABPC4, FBRSL1, FAM162A, BCL2A1, SAR1A, NBN, ANP32A, LGMN, SFN, AMBRA1, QPRT, GTF2I, NEK4, ANKEF1, RTN4R, CALML5, EEF1D, GDF5, TTC9, PMEPA1, CALM2, RNF19A, MAPK8IP3, ARMC9, SLC35B1, SLC39A13,…	Up-regulated
DARWICHE_SQUAMOUS_CELL_CARCINOMA_up	0.0170176	0.0528555	0.354235	1.40257	155	142	CACYBP, UBE2C, HBS1L, HSPD1, ESD, TXN, PDCD5, SFPQ, RPL39, CCT4, PGAM1, YWHAB, S100A11, UCK2, SRM, STX16, VHL, SPP1, TMEM248, SLPI, NCL, TCP1, COX5B, ELAVL1, BAIAP2, SARAF, ENO1, IFITM3, SRSF1, TTLL11, SOD1, CXCL16, LY6E, PFKL, RNF181, ENAH, NHP2, IL1B, CHI3L1, EEF1B2, KLK9, FAM162A, DYNLL1, IDE, SUN1, NEK4, CX3CL1, KLF13, RPS6KA4, EEF1D, GDF5, LDHA, SPIC	Up-regulated
DARWICHE_SQUAMOUS_CELL_CARCINOMA_dn	0.313572	0.48611	0.268801	1.08241	2924	171	PDP2, PVT1, LYAR, GID8, ZNF830, LRIF1, LRRC58, EIF5A, C14orf119, ASNS, YTHDF2, PRRC1, DENR, MSI1, DOK4, CSPP1, FOXL2, SRSF1, KPRP, SSU72, IRAK1, GTF2E2, TNP2, C11orf58, RNF26, EML4, PABPC4, RPS3A, HAMP, LTB4R, FBRSL1, BCL2A1, SAR1A, CPA5, NBN, ANP32A, LGMN, SFN, AMBRA1, QPRT, GTF2I, ANKEF1, RTN4R, CALML5, SMU1, RBM12, TTC9, VPS37A, CALM2, MAPK8IP3, ARMC9, SLC35B1, SLC39A13, NUF2, IFT20, TRAF2, SR…	Up-regulated
DASU_IL6_SIGNALING_up	0.593088	0.739533	0.264156	0.926693	4873	57	CKS2, CDC25B, CD47, TFAP2C, CXCL3, HSPA1A, CXCL8, MMP3, LY6E, IRAK1, TRIM16, CEBPB, MMP1, KHSRP	Up-regulated
DASU_IL6_SIGNALING_SCAR_up	0.347866	0.522594	0.347691	1.08855	2632	31	TPX2, CCNB1, CDC25B, LARP1, MME, UBE2S	Up-regulated
DAUER_STAT3_TARGETS_up	0.196117	0.351393	-0.276492	-1.15613	393	47	ZFP36, AKAP12, PLPP3, STAT3, THBS1, FLNB, FGA, GFPT2, AGT, UGCG, CEBPD, C3, PLA2G6, ADM, IGFBP1	Down-regulated
DAUER_STAT3_TARGETS_dn	0.443763	0.611753	0.300715	1.01812	3546	47	TMEM97, PARP12, HSPA1A, IFITM1, HSPA1B, HERC5, ISG15, OASL, LAP3, IRF7, TDRD7, DDX58, IFI27, STAT1, GRB14, OAS1, MX1, IFIT3	Up-regulated
DAVICIONI_MOLECULAR_ARMS_VS_ERMS_up	0.699082	0.817549	0.219234	0.921821	6850	322	PSMB2, ADK, GOT2, ARL3, MET, TOX3, BCL11A, DNMBP, TBCA, DHFR, CD47, USP12, PAX2, CDH3, DOCK9, LPAR2, SYNCRIP, MYB, ZCCHC14, CDC14B, PARP1, COG2, TMEM120B, ASS1, CEP104, NPEPPS, TSC22D2, EIF1AX, NPC1, MORC4, ERI2, TSTD2, BRINP1, CUL3, FBXO9, RRAGD, WWOX, CPD, SLC9A6, PCMT1, OAT, RAP1GAP2, MEGF9, ACYP1, PRMT2, ZNF91, HSBP1, SLC38A1, ADAM10, ERP44, SPATS2L, LIPG, HPRT1, MICAL1, NHLH1, MYLIP, PKP4, M…	Up-regulated
DAVICIONI_MOLECULAR_ARMS_VS_ERMS_dn	0.00157729	0.00766367	-0.328649	-1.74641	0	176	FAT4, LAMA2, RBMS3, LPAR1, LTBP4, CD248, ASAP3, EMP3, PTN, MFAP4, GLT8D2, MMP2, COLEC12, TRAPPC9, EFEMP2, MFAP2, CPM, BST2, PLPP3, OLFML3, PRR16, CHMP7, CREB3L1, ITM2A, PMP22, TSPAN9, IER2, SEMA3B, ITM2C, OBSL1, TPBG, PLK2, INPP4B, P3H4, CNNM4, SNCAIP, EMILIN1, ARHGEF40, FZD7, OPLAH, RAB32, DLC1, PSD3, SORBS3, TP63, MYF5, KCTD12, HIF3A, SLC1A3, KHNYN, PDGFRL, ISLR, TRIP6, GULP1, SOBP, RHOG, SIGIR…	Down-regulated
DAVICIONI_PAX_FOXO1_SIGNATURE_IN_ARMS_up	0.366102	0.540638	-0.239476	-1.04792	647	58	SGK1, PRKAR2B, ANK2, TBC1D9, VWA5A, KCNS3, TRAM2, MEG3, MN1, PAX5, BMP5	Down-regulated
DAVICIONI_PAX_FOXO1_SIGNATURE_IN_ARMS_dn	0.844907	0.912936	0.256043	0.730559	6046	20	SPRY4, GAS2, NAP1L1, IGFBP3, MYLPF, ATP2A1, DUSP4	Up-regulated
DAVICIONI_RHABDOMYOSARCOMA_PAX_FOXO1_FUSION_up	0.668191	0.79434	0.247865	0.88264	5551	62	SKP2, MET, PPP1R14B, NUP93, ASS1, MORC4, FGGY, CD9, JUN, ADAM10, OSTF1	Up-regulated
DAVICIONI_TARGETS_OF_PAX_FOXO1_FUSIONS_up	0.127778	0.255945	-0.205204	-1.12466	45	245	ADAMTS1, SGK1, NID1, PRKAR2B, COL14A1, ANK2, TBC1D9, NR2F2, PCSK5, PTGS1, SNAI2, NR3C1, TPM4, AKAP12, ADAM19, ID2, VWA5A, FOXO1, KCNS3, TRAM2, MEG3, PTPRE, MN1, RHOB, CYBRD1, GAS1, CHST11, FST, TPBG, PAX5, THBS1, BMP5, TCF7L1, COL6A2, VEGFC, ID3, COL5A1, PRRX1, VSTM4, CTSC, ECM1, PLXNC1, SOCS2, MSN, ACKR3, EMP1, MAFF, RAB32, PCDH7, MAP4K4, MSX2, WBP1L, M6PR	Down-regulated
DAVICIONI_TARGETS_OF_PAX_FOXO1_FUSIONS_dn	0.223091	0.385245	-0.252842	-1.12355	370	63	PDE4D, NEB, TTN, WDR7, SPARCL1, OLFML3, BBX, PLK2, ARHGEF6, NEFM, TCF4, KCTD12, GREM2, MAP3K9, LRP5, MOXD1, MYOG, EDNRA	Down-regulated
DAVIES_MULTIPLE_MYELOMA_VS_MGUS_dn	0.620187	0.758424	-0.250908	-0.901132	1658	25	CDK14, CTSG, ARHGAP1	Down-regulated
DAWSON_METHYLATED_IN_LYMPHOMA_TCL1_up	0.000564972	0.00342598	-0.445626	-1.95002	0	58	MEDAG, ID4, NRSN1, TNFAIP2, FIGN, EPHA7, ESR1, ADGRL2, SOX1, ISM1, EGR2, NCAM1, RNF180, TBX18, PRR16, PTPRD, GAS1, ARHGEF26, SOGA3, RUNX1T1, TMEM229A, SAMD5, SOX17, FOXG1, FOXD3, TSHZ3, MACROD2, PCDH10	Down-regulated
DAZARD_RESPONSE_TO_UV_NHEK_up	0.0102052	0.034693	0.33827	1.38363	96	206	RPS2, RPS21, HSP90AB1, GATC, PMS2P1, SNRPE, NEU1, ANXA2P3, TXN, COX7A2, SEC61G, RPSA, RPL36A, RPS23, RANBP1, UQCRB, YKT6, PPIF, TIMM44, RPL38, CXCL3, ATF4, RPL37A, UBE2M, TM4SF1, ERGIC3, ODC1, ZNF623, RPL30, CYP2J2, NDUFA1, PRSS3, CCL20, CEACAM1, TXNL4A, RPS17, CLDN4, SPINK1, CCNT2, CXCL8, UBE2S, NOL7, POP7, JUN, LY6E, TOB1, RPL31, TACSTD2, SULT2B1, PFN1, ANXA2, EIF3G, RALY, COL11A1, PHLDA2, TUBB…	Up-regulated
DAZARD_RESPONSE_TO_UV_NHEK_dn	0.000102575	0.00109167	0.37329	1.56175	0	292	CERS6, FNBP1L, RRS1, MKI67, AURKA, USP1, WDR82, SLC7A1, TOP2A, MYC, KIF23, PTK2, ZNF451, INSIG1, TUBGCP3, PLK4, CCNB1, CCNB2, CENPF, SLBP, XPO1, CUL1, E2F5, GJB3, USP6NL, ERBB3, POLE2, DOCK9, NPAS2, PHIP, E2F3, POLD3, METTL18, INSIG2, NAA20, SLC25A36, SMAD5, ADNP, ZCCHC14, ORC2, HMGXB4, RIF1, ZMYND8, BAZ1A, ASXL1, NUP153, KIF11, WEE1, RNF13, MTMR6, RRP1B, TAF5L, KIF2A, SLC9A6, PPIP5K2, KLHL9, XPA…	Up-regulated
DAZARD_RESPONSE_TO_UV_SCC_up	0.000113533	0.00109167	0.486423	1.84947	0	97	PFDN6, PTGES3, CDK1, ADK, MYCBP, HSP90AB1, SSBP1, CCNC, PRDX3, YWHAZ, TAF2, DSG2, PDIA6, PAPOLA, ANXA3, B2M, UQCRC2, RAD51C, CXCL3, TM2D1, SRI, SRSF10, UBE2E1, CCL20, SNX3, CXCL8, SRSF1, DYNLT3, DYNC2LI1, TOB1, TACSTD2, ANXA2, LAMP2, HPRT1, SDHD, IL1B, PRKAR1A, COPB1, NAP1L1, SSR1, RBBP4, TWF1, AIMP1, ALDH7A1, ME2, NEK4, CXCL1, CTCF, IGFBP7	Up-regulated
DAZARD_RESPONSE_TO_UV_SCC_dn	0.0442398	0.114919	0.3503	1.35048	393	110	RRS1, AURKA, MYC, AMD1, NOP16, RPP38, CSTF1, E2F3, ADNP, ZMYND8, ANKRD46, NUP153, WEE1, HMGCR, KIF2A, BAIAP2, IST1, RAP1GAP2, PUM1, DDX3Y, COIL, ZNF146, FOXJ3, THBD, ATP13A3, KBTBD2, PHC2, N4BP1, SLK, BLCAP, MTF2, TRAF4, NGDN, CHD1, PATZ1, SIAH1, CTCF, MPHOSPH10, TGIF1, USP32P2, CNOT4, BRD8, SOX4, MARK3	Up-regulated
DAZARD_UV_RESPONSE_CLUSTER_G1_up	0.000604522	0.0036091	0.494003	1.74953	4	60	RPS21, HSP90AB1, SNRPE, ANXA2P3, TXN, COX7A2, SEC61G, RPL36A, RPS23, RANBP1, UQCRB, RPL38, RPL37A, ZNF623, RPL30, NDUFA1, RPS17, NOL7, RPL31, ANXA2, COL11A1, NCBP2, MYF6, DYNLL1, COX17, RPS27, PLXNA3, RPL37, COX7C, RPL34, TSC22D1	Up-regulated
DAZARD_UV_RESPONSE_CLUSTER_G2_up	0.337382	0.511345	0.367377	1.09763	2471	25	CXCL3, ATF4, CCL20, CLDN4, CXCL8, UBE2S, LY6E, TOB1, TACSTD2, PHLDA2	Up-regulated
DAZARD_UV_RESPONSE_CLUSTER_G24_up	0.232901	0.395006	-0.340369	-1.15823	646	21	IL1RL1, ZFP36, JUND, S100A9, FLG, NEFM, ECM1	Down-regulated
DAZARD_UV_RESPONSE_CLUSTER_G28_up	0.453968	0.621654	0.366834	1.0076	3214	17	CXCL3, CCL20, CXCL8, TACSTD2, ANXA2, PHLDA2, INSL4, PMAIP1, ATF3, CXCL2	Up-regulated
DAZARD_UV_RESPONSE_CLUSTER_G4_up	0.469014	0.634374	0.358629	0.997546	3329	18	PRSS3, SULT2B1, PFN1, TUBB4B, SOX15, ARHGDIA, TUBB3, KRT34, APRT	Up-regulated
DAZARD_UV_RESPONSE_CLUSTER_G6_up	0.00010923	0.00109167	0.434982	1.71928	0	140	FNBP1L, RRS1, MKI67, SLC7A1, TOP2A, KIF23, PTK2, ZNF451, TUBGCP3, CCNB1, CCNB2, SLBP, XPO1, CUL1, E2F5, POLE2, DOCK9, NPAS2, PHIP, POLD3, INSIG2, NAA20, SLC25A36, ORC2, ZMYND8, BAZ1A, KIF11, RNF13, RRP1B, KIF2A, SLC9A6, KLHL9, XPA, MEGF9, ZZZ3, VLDLR, ZNF146, SP3, SMC4, KIF14, AUTS2, ATP13A3, UBR5	Up-regulated
DE_YY1_TARGETS_up	0.0962507	0.207708	0.489913	1.3815	687	19	WNT1, TRIM31, CHIT1, TACSTD2, RFC1, IL19, SMPD3	Up-regulated
DE_YY1_TARGETS_dn	0.0219087	0.0653569	0.382889	1.44069	190	90	CDK1, RBL1, TTK, MET, CCNL1, GDI2, GSPT1, NAA15, PDHA1, ENC1, HNRNPH1, CDC27, CCNE2, SNX3, RB1, RAB6A, CD2AP, CAPZA2, MPHOSPH9, PKN2, USP9X, IPO7, BARD1, DNTTIP2, RASA1, INHBA, CUL5, RASSF3, EGFR, CCNG1, TAGLN2, ITGA4, PNN, RBBP6, PTP4A1, EGF, CSNK1G3, PTEN	Up-regulated
DEBIASI_APOPTOSIS_BY_REOVIRUS_INFECTION_up	0.000102764	0.00109167	0.383109	1.5992	0	282	PFDN4, RRS1, DNAJC2, NUP58, RAD51AP1, BRCA1, LSM5, TIAL1, GINS1, TGDS, MAK16, IFRD1, UBE2V2, AGFG1, PLK4, PPAT, CHEK1, SLC3A2, BET1, SMAD5, PGAM1, DHX9, TBPL1, ATF1, GPN1, RAB21, TAP1, TM2D1, RPE, WEE1, ITCH, PAWR, ZNF623, UBE2H, CDC27, PPP3CB, PITPNB, BCL10, IFITM1, CCNE2, SPATA2, UBE2L6, BUB3, ABI2, CXCL8, CETN3, MKLN1, DCTN6, IFITM3, CXCL11, CD2AP, ZNF518A, OSER1, CREM, ZZZ3, CAPZA2, DNAJB6, P…	Up-regulated
DEBIASI_APOPTOSIS_BY_REOVIRUS_INFECTION_dn	0.00950315	0.0329939	0.329301	1.36931	91	263	SLC7A5, MKI67, EPHB2, TMEM63A, TFRC, BRCA1, GLB1, MYC, TRIM27, PDIA4, CBR1, BCL11A, MLEC, INSIG1, RAD54L, ITGA6, SLC29A1, CELSR2, DHCR7, GGA2, HYOU1, EP400, DHX9, EPHB4, MBTPS1, STK25, NUP210, FANCA, ALDH1B1, CLEC16A, CHD4, GRHPR, PREP, SULT1A2, PLXNB2, RBM14, STC1, ATP7B, THRA, PARP4, RPARP-AS1, DDB2, KDELR2, FTSJ1, MGAT5, PI4KB, TCF7, CD9, NOMO1, CAD, SQLE, MAT2A, PRMT2, ATR, AQR, CTNS, ERCC5, …	Up-regulated
DEBOSSCHER_NFKB_TARGETS_REPRESSED_BY_GLUCOCORTICOIDS_up	0.544996	0.701342	-0.276233	-0.939988	1513	21	IL6, CCL11, CCL5, VCAM1, CCL13	Down-regulated
DELACROIX_RAR_BOUND_ES_up	0.0471727	0.12117	0.283374	1.20883	467	442	LACTB2, UBXN2A, ZSWIM1, FAM91A1, MTHFD1, ALKBH7, TMEM60, CENPM, CDH1, SPIRE2, SPC25, FAM32A, PPP1R14B, GIPC2, LDHB, SH3BP1, MRPL51, MDK, WNT1, IDH3B, TCF19, SPP1, PCGF1, RPS8, RPS15A, AKAP1, RIF1, SET, LSR, RASL10B, KSR1, MYBL2, ACP6, WEE1, PPP5C, C9orf153, NUDT4, MRPL37, PRMT8, MME, IFITM1, CCND1, ZFP64, GNL3L, EIF3L, TYROBP, PURB, POU5F1, MOK, AEBP2, COG6, RHOF, TMEM63C, DNAJB6, GRTP1, SEPSECS,…	Up-regulated
DELACROIX_RAR_TARGETS_up	0.45775	0.624391	-0.240768	-0.995952	947	45	NID1, CA12, TGFB3, MMP2, CP, ZBP1, TYK2, INMT, HOXD12, CAPN5, DHRS3	Down-regulated
DELACROIX_RAR_TARGETS_dn	0.031028	0.0860308	-0.431222	-1.52987	82	24	OGN, PALMD, FSTL1, FIGN, NRP1, CLNK, FGFR2, EMP1, LSP1, TIMP3, TPM2, MRGPRF	Down-regulated
DELACROIX_RARG_BOUND_MEF_up	0.401197	0.574941	0.244815	1.03508	3954	354	EPHB2, NDUFA4, UBE2C, CNIH4, ALKBH7, F11R, RNF139, IFRD1, ESD, RPL10A, RLIM, FUBP1, HOXA13, USP6NL, DGAT1, OSBPL2, SH3BP1, ZNF574, WNT1, HPDL, CPSF4, IDH3B, PLAGL2, WNT10B, C1QTNF1, MRPL34, MAPK13, PIGT, PEX2, TM4SF1, HMGA1, HOXA10, PIK3R2, PRSS8, MRPL37, CCND1, DOK4, USPL1, SYT8, ATP11A, ANXA9, GAS2, NDFIP1, RHOF, GDPD5, LNX2, SERINC5, PRSS22, ANKRD24, HGFAC, YAP1, PARK7, CALR, CTNS, OLFML2A, UB…	Up-regulated
DELASERNA_MYOD_TARGETS_up	0.929894	0.960752	0.191367	0.714015	8037	85	STAM, TFRC, KLF5, AGPAT5, KLHDC10, RB1, ATP1A1, VKORC1, SCRIB, FCER1G, HS2ST1, DCAKD, HDAC11, CELF1, TNNT3, FZD3, CPSF6, MYLPF, ATP2A1, PPFIA4, CHRNG, CFL2, CD82, ANXA11, PACS2, BCL6	Up-regulated
DELASERNA_MYOD_TARGETS_dn	0.133424	0.263579	0.364949	1.26281	1080	53	CENPM, SLC5A3, DDX28, FNBP4, CD47, PLP2, POLE2, ATP6V0C, STARD4, ZMYND8, IFITM1, BAIAP2, HMGB3, TPR, THBD, COL11A1	Up-regulated
DELLA_RESPONSE_TO_TSA_AND_BUTYRATE_up	0.107727	0.225496	0.475625	1.35709	770	20	PRDX1, MAPRE1, HSPA1A, CDC20, TOB1, EPHB3, GATA2, HSPB1, POR, PRKCD, NET1	Up-regulated
DELPUECH_FOXO3_TARGETS_up	0.140425	0.274702	0.348993	1.24717	1170	63	KLF5, MARCKSL1, PDZK1IP1, ERBB3, S100P, LGR5, UBE2H, CLDN4, CD9, TNFRSF21, PHLDA2, C11orf58, GM2A, PLAUR, CTSB, MXI1, KRT6B, SPAG1, SEMA3C, WDR45, GTF2I, KIAA0040, GNB5, RERE	Up-regulated
DELPUECH_FOXO3_TARGETS_dn	0.000130056	0.00109167	0.651495	2.08882	0	35	EXOSC8, MKI67, AURKA, UBE2C, SLC7A1, TIAL1, PYCR1, CENPF, MTHFD2, PRC1, HAX1, APEX1, IMPDH2, DTYMK, EPB41L4A-AS1, SMC4, NUSAP1, AREG, KIF22	Up-regulated
DELYS_THYROID_CANCER_up	0.169119	0.315547	0.263655	1.12407	1677	434	CLDN1, CKS2, ATIC, SLC7A5, PON2, GGCT, ADK, STAM, MET, SDC4, APOC1, MPV17, UBE2A, PDZK1IP1, GJB3, CDH3, ERBB3, DHCR7, ITGA2, DOCK9, MSMO1, PPP4C, S100A11, MDK, CKLF, SPP1, SLPI, SYNGR2, SFTPB, ENC1, NMU, MAPK13, LSR, SPOCK2, PNP, NFE2L3, APOC2, PLXNB1, ODC1, ITGA9, ETV5, PRSS3, CPD, PLXNB2, S100A10, CCND1, TSPO, CTSH, CXCL8, ATP11A, DDB2, MEGF9, CEACAM6, CTSA, MMP11, CHIT1, MYO6, LY6E, TMSB10, AT…	Up-regulated
DELYS_THYROID_CANCER_dn	0.00242131	0.0109054	-0.493032	-2.67213	0	230	SFRP1, ADH1B, OGN, RYR2, LAMA2, SLC4A4, RERGL, DPT, FCGBP, NEB, LPAR1, CSRP2, MATN2, EYA2, EMCN, ID4, GNA14, PTN, CXCL12, HBA1, CPQ, ZFPM2, MT1X, PRKACB, KIT, ITIH5, MT1H, TLE4, SETBP1, MT1G, COPZ2, TAL1, CITED2, EGR2, EGR1, PLN, NCAM1, DNASE1L3, AKAP12, CHRDL1, P2RY14, FBLN5, MPPED2, IPCEF1, SLC14A1, ROR2, MT1E, GHR, CYBRD1, FHL1, ITM2A, MGP, CDH16, TSPAN7, TSC22D3, FOSB, HBB, MYOC, IER2, GAS1, …	Down-regulated
DEMAGALHAES_AGING_up	0.09	0.197931	-0.296226	-1.27725	170	53	DCLK1, SGK1, EFEMP1, C1QA, HBA1, JCHAIN, CLU, LAPTM5, CLIC4, MSN, MPEG1, GSTA1, C1QB, C3, TXNIP	Down-regulated
DEMAGALHAES_AGING_dn	0.155508	0.297384	0.486304	1.29195	1086	15	TFRC, NDUFB11, UQCRQ, GHITM, CX3CL1, ACSS2, COL4A5	Up-regulated
DEN_INTERACT_WITH_LCA5_up	0.000136482	0.00109376	0.714367	2.11662	0	24	C1QBP, HSPA9, YWHAZ, CSNK2A2, YWHAB, NPM1, NCL, SET, HSPA1A, CSNK2A1, HSPA8, HSPA1B, USP9X, YWHAH, YWHAE, YWHAQ, NAP1L1, RANBP9, HSPA5, DYNLL1	Up-regulated
DER_IFN_ALPHA_RESPONSE_up	0.365868	0.540638	0.291848	1.06478	3099	72	SSBP1, ATP6V0B, SRSF2, XRCC6, TAP1, B2M, CYCS, IFITM1, SDCBP, PSMB9, SRP9, PSMB10, TRIM21, POLR2B, PDXK, IRF1, ISG15, OASL, RBBP4, IFI6, GBP1, STAT1, PMAIP1, LIPA, OAS1, MX1, IFIT3	Up-regulated
DER_IFN_BETA_RESPONSE_up	0.00328985	0.0139592	0.416356	1.58769	28	100	DNAJC2, DDX21, SSBP1, ATP6V0B, SRSF2, FUBP1, ITGA2, XRCC6, PARP1, TAP1, DDX1, B2M, CYCS, PPP5C, ETS2, IFITM1, BCLAF1, PARP4, PSMB9, SRP9, AP3M2, ELK4, PSMB10, TRIM21, PTPN11, EIF2AK2, ELF1, POLR2B, PLAUR, PDXK, NAP1L1, IRF1, ISG15, OASL, RBBP4, ADAM9, HADHB, IFI6, GMFB, GBP1, FOSL1, STAT1, PMAIP1, LIPA, OAS1, TEAD1, MX1, CTR9, IFIT3, EIF3A	Up-regulated
DER_IFN_GAMMA_RESPONSE_up	0.124985	0.252106	0.34729	1.25997	1053	69	SSBP1, ATP6V0B, SRSF2, XRCC6, PARP1, TAP1, B2M, CYCS, PPP5C, IFITM1, SDCBP, PSMB9, SRP9, ELK4, PSMB10, TRIM21, BAK1, NAP1L1, IRF1, VAT1, ISG15, RBBP4, HADHB, GBP1, FOSL1, STAT1, PMAIP1	Up-regulated
DESERT_EXTRACELLULAR_MATRIX_HEPATOCELLULAR_CARCINOMA_SUBCLASS_up	0.666667	0.794063	-0.256641	-0.873318	1851	21	CPE, FBN1, SSUH2, PLXNC1, SRPX, DCN, CCL19, PPIC	Down-regulated
DESERT_PERIPORTAL_HEPATOCELLULAR_CARCINOMA_SUBCLASS_up	0.0027248	0.0120947	-0.278597	-1.45416	1	156	ABCA8, C7, TAT, FOLH1B, ESR1, CYP2C9, ACACB, IGF1, DNASE1L3, AGXT, ANO1, GHR, PBLD, ALDH8A1, FXYD1, ARG1, ANPEP, ECHDC2, CD14, TCF7L1, C1R, SLC10A1, TDO2, ADH1A, CDA, GCH1, FAM149A, ECM1, SOCS2, MASP2, GSTA1, ITIH4, ACADL, ASPA, CYP2C18, OTC, LRRC31, KDM8, EHHADH, GPR88, BDH2, SPP2, OGDHL, ETFDH, CPEB3	Down-regulated
DESERT_PERIVENOUS_HEPATOCELLULAR_CARCINOMA_SUBCLASS_up	0.000216169	0.00162921	0.413452	1.64926	1	152	SCD, PFDN6, MCUR1, GGH, MTHFD1, DUT, CYB5B, NARS2, IARS2, CUL1, PREB, RHEB, LGALS8, MRPS33, GTF2IRD1, NEDD4, TERF2, KIZ, RCBTB1, TTC1, STXBP6, ARHGAP12, SPCS1, GRHPR, LGR5, AP3S1, CGREF1, GNPAT, NCOA2, SMYD2, OAT, OSER1, YAP1, APOC4, TCEAL1, LCN2, TIMM17A, RAD50, EIF2D, RB1CC1, PEX19, LEF1, EFR3A, ANKRA2, WDR12, AIMP1, ACSM5, HSD11B1, RAB11FIP2, SULT2A1, FMO3, ATOX1, DSP, SDAD1, ABLIM1, TGIF1, MR…	Up-regulated
DESERT_STEM_CELL_HEPATOCELLULAR_CARCINOMA_SUBCLASS_up	0.000103928	0.00109167	0.607868	2.51311	0	234	CKS2, TPX2, CSE1L, PTTG1, PLBD1, ATIC, HJURP, RPL8, SMARCC1, DKC1, EIF3E, BUB1, CDK1, RAD51AP1, BZW2, TTK, STK26, UBE2C, TRIP13, TFRC, CEP55, UBE2I, RPLP2, SLC7A1, INTS8, TOP2A, CCT2, KIF23, FBL, CENPM, CBX3, PTK2, AMD1, MARCKSL1, HDAC2, YWHAZ, CDC25B, MMP9, LBR, PPP1CC, MTHFD2, LAPTM4B, MMP12, DSG2, PLP2, PRC1, EIF3H, SSRP1, STK39, KIF20A, RPSA, SSB, NCAPG, MAPRE1, S100A11, UCK2, EPCAM, CLIC1, D…	Up-regulated
DEURIG_T_CELL_PROLYMPHOCYTIC_LEUKEMIA_up	0.000101657	0.00109167	0.362769	1.52969	0	337	TMEM97, RAD54B, KRT18, MKI67, SCCPDH, ADK, BZW2, SORD, PRIM2, TRIP13, LSM5, NCKIPSD, SLC39A4, HSP90AB1, LYPLA1, EIF4EBP1, PTK2, MARCKSL1, NCAPG2, BPHL, CCNB1, CCNB2, MMP9, DHFR, CELSR2, SORT1, RMDN1, PUS7, ERBB3, DGAT1, RIPK2, BOP1, PAICS, HMGN5, PRKDC, CYC1, IMPDH2, EPHB4, NEDD4, ST6GALNAC4, PTPRO, LARP1, CBLL1, RNF170, ESRP1, STXBP6, FZD6, CPNE3, FKBP1A, GRHPR, CYP2A6, GRM6, TKT, HEY1, KLHDC10,…	Up-regulated
DEURIG_T_CELL_PROLYMPHOCYTIC_LEUKEMIA_dn	0.803378	0.886131	0.207328	0.869301	7848	304	NUP58, HSPA14, CUL2, TBC1D4, TRMT11, CEBPZ, TRAV21, HBS1L, FUBP1, XCL1, SCML1, PIK3R1, GGA2, LGALS8, YKT6, CIR1, ZBED5, TAF1D, B3GNT2, DUSP12, ENC1, KIZ, IDI1, ATG12, ZBTB38, EIF1AX, CNOT7, HNRNPH3, HAT1, THOC1, IFITM1, EOGT, REEP5, PPWD1, CDKN2AIP, PHACTR2, RAP1GAP2, DDB2, CREM, YME1L1, DNAJB6, TARDBP, CASP1, CMC2, SS18L2, TES, ADGRG1, ANXA2, TNFRSF1B, INTS6, ZNF37BP, TPST2, N4BP2L2, GPR137B, EM…	Up-regulated
DIAZ_CHRONIC_MEYLOGENOUS_LEUKEMIA_dn	0.74108	0.8475	-0.182156	-0.904695	809	112	F13A1, JAM2, ADAP2, CAPN3, FGFR1, MCL1, CD53, PTPRE, MN1, CCR2, S100A9, EPB41L3, FLNB, CDH2, MYLK, INSR, MS4A6A, FLT3, TERT, CEBPD	Down-regulated
DING_LUNG_CANCER_BY_MUTATION_RATE_up	0.0780316	0.177716	-0.416946	-1.40455	221	20	PDGFRA, PTPRD, MAST4, LRP1B, NTRK2, TYK2	Down-regulated
DING_LUNG_CANCER_EXPRESSION_BY_COPY_NUMBER_up	0.000113779	0.00109167	0.560743	2.12856	0	96	MIPEP, CDK8, SEC23IP, DNAJC2, FAM91A1, RFC4, PNPT1, GTF3A, TERF1, KRIT1, TBCA, TAF2, RAE1, EIF3H, URI1, E2F3, KPNA4, EID2, ANKRD46, CBLL1, ASH2L, MFN1, NUP153, DCTD, GATAD1, ANKRD10, NEK3, THOC1, MTMR6, COG5, PAK2, PAN3, VPS41, PRKCI, MRPS28, DCAF13, SDHC, GEMIN2, ARMC8, BAG4, GZF1, RASA1, BRMS1L, ARMC1, KBTBD11, PPP4R2, RB1CC1, ZNF302, MAPK8	Up-regulated
DING_LUNG_CANCER_MUTATED_SIGNIFICANTLY_up	0.169382	0.31591	-0.338231	-1.22662	446	26	PDGFRA, NTRK3, ERBB4, PTPRD, LRP1B, NTRK1, KDR, KRAS, ATM, PAK3, EPHA3	Down-regulated
DIRMEIER_LMP1_RESPONSE_EARLY_up	0.378111	0.553181	0.298289	1.05899	3129	61	HSP90AB1, MYC, INSIG1, RPS16, NFKBIE, RPS9, UBE2M, RPS10, JUP, ZC3H12A, JUN, SEC24C, HMGCS1, EEF1A1, BCL2A1, EIF1, TRAF4, ACTB, IRF7, FTH1	Up-regulated
DIRMEIER_LMP1_RESPONSE_LATE_up	0.242163	0.405489	0.333171	1.1574	1969	54	SLC7A5, STIP1, SLC7A1, POM121, MTHFD2, DHCR7, RPS28, TNFRSF1B, SRRT, ATP13A3, STAT5A, NBN, ANP32A, SQSTM1, FSCN1, CD58, BATF, LYN, HSD17B10, SPIB, BZW1, ETF1, VOPP1, CSNK1D, IRF5, SERPINB9, PIEZO1, NFKB2	Up-regulated
DIRMEIER_LMP1_RESPONSE_LATE_dn	0.0117789	0.0390059	0.52848	1.62918	87	29	RPS5, RPL29, COX8A, IFITM1, RPS11, RPLP0, LSM2, PSMB9, APOC4, UBC, COL11A2, FAU, RPS19, ISG15, GAPDH, TAF10, HPCAL1	Up-regulated
DITTMER_PTHLH_TARGETS_up	0.000112499	0.00109167	0.493962	1.89929	0	107	CKS2, CDK1, USP1, UBE2C, LSM5, RFC4, RNPS1, CDC25B, SFPQ, STK39, HAX1, POLD3, CST4, RBM39, VDAC2, CYCS, GRHPR, NUDT4, SRSF10, CPD, CDCP1, TPI1, RAB6A, UROD, AP2S1, ANXA7, CTNNB1, ATP1A1, RBX1, CAPZA2, POLR3C, SF3B3, RAB22A, SRSF3, IMMT, B4GALT3, LAMP1, HSD17B11, BSG, TIMM17A, AREG	Up-regulated
DITTMER_PTHLH_TARGETS_dn	0.105775	0.222931	0.354156	1.28488	891	69	PTK2, ITGA6, CUL4A, PIK3R1, PSMB4, SPTLC2, MRPL34, RPP30, HSP90AA1, TCP1, FBXO7, NDUFB3, KDELR2, TFDP2, GLS, YME1L1, MRPS14, CASP1	Up-regulated
DOANE_BREAST_CANCER_CLASSES_up	0.0404624	0.107472	-0.296957	-1.35648	62	70	ABCA8, CIRBP, FAM174B, TBC1D9, SCUBE2, PBLD, RHOB, MLPH, TNXA, SPDEF, ECHDC2, PRLR, RND1, CCNDBP1, AR, HGD, BRINP3, PIP, TFF3, LRRC31, HMGCS2, CLCA2	Down-regulated
DOANE_BREAST_CANCER_CLASSES_dn	0.289734	0.46147	0.362132	1.13376	2192	31	FERMT1, DEK, SPIDR, SPP1, SLC16A1, ATP11A, PLAUR, ARTN, FOXC1, PYGL, FSCN1, PMAIP1, PARVB, CTSV, PAPSS1, C16orf95	Up-regulated
DOANE_BREAST_CANCER_ESR1_up	0.40979	0.583802	0.268686	1.03543	3649	109	KRT18, TMC5, SCCPDH, TOX3, CHAD, MYB, CACNA1D, C9orf116, CACNG4, ARMT1, SLC39A6, FBP1, PNPLA4, CYP2B6, DACH1, ANXA9, CYP2B7P, MYO6, AZGP1, GPRC5A, SCGB1D2, SYBU, CERS4, AREG	Up-regulated
DOANE_BREAST_CANCER_ESR1_dn	0.391179	0.566047	0.311696	1.05083	3112	46	MPP6, BCL11A, GJB3, SLPI, ASS1, PSAT1, TTLL4, CXCL8, ARNTL2, ART3, EGFR, KRT6B, FOXC1	Up-regulated
DOANE_RESPONSE_TO_ANDROGEN_up	0.0274367	0.0777177	0.332243	1.34095	256	175	HSPH1, SCD, TMC5, SORD, STK3, TMEM33, MCCC2, CYP4F8, S100P, ALDH4A1, POP1, CACNG4, AHCY, SIL1, HSPA4, HOXA10, PREP, ABCC1, SLC19A2, ST6GAL1, TMPRSS2, FARP1, ZC3H13, GSK3A, THRAP3, SERINC5, AZGP1, DALRD3, CALR, FAR2, GBAP1, GPRC5A, DDC, IL1B, DDX31, GM2A, PDXK, ACSM3, IL19, NDRG1, PTMAP4, DNASE2B, ALCAM, COBL, SOCS7, ZNF552, TSKU, LGALS3, GNB5, ENDOG, MAFG, PEA15, TPD52, CD3E, RPL35P8, CLCN3, PYGB…	Up-regulated
DOANE_RESPONSE_TO_ANDROGEN_dn	0.176385	0.32528	0.27936	1.15384	1693	232	RAD54B, RPS2, E2F8, CDK1, SCCPDH, SNX7, TRA2A, RAD54L, PLK4, DHFR, SMYD5, SGTA, BRIP1, PAQR4, CACNA1D, TMEM123, NMU, TSC22D2, C4orf19, ZNF93, PRSS8, ASPH, STAG2, IFITM1, CCNE2, RECQL4, GNG10, PLEKHA6, IFITM3, ANXA9, HELLS, NOC4L, CPOX, HCFC1R1, ZFR, SUZ12, TRAF5, MXD3, HEATR6, PLPP2, SLC25A14, ZPR1, PHLDA2, LRCH4, RAB15, TRAIP, TPT1, ARG2, RAI14, IDH2, CTNND2, SERPINH1, HP1BP3, ACTN2, BLMH, IGFBP…	Up-regulated
DORMOY_ELAVL1_TARGETS_up	0.22338	0.385245	0.434868	1.20961	1585	18	CDKN3, CCNA2, CDK2, CDC7, PIDD1, ACTB, PDCD10, ATXN2, RBM8A	Up-regulated
DORN_ADENOVIRUS_INFECTION_12HR_up	0.558545	0.711986	-0.25922	-0.940079	1473	26	CYTH1, SNAI2, IFIT1, MFAP2, TSC22D3, PLK2	Down-regulated
DORN_ADENOVIRUS_INFECTION_12HR_dn	0.544947	0.701342	0.305247	0.947659	4097	30	TOP2A, MYC, SYNCRIP, HNRNPH1, CCND1, SDCBP, CCNK, TRAF4, FHL2, TXNRD1, SRSF5, EWSR1	Up-regulated
DORN_ADENOVIRUS_INFECTION_24HR_dn	0.280816	0.45164	-0.275779	-1.10065	605	39	SGK1, IL6, CYTH1, SNAI2, MFAP2, MCL1, LIMA1, PLK2, CD83, BCAR3, NR4A1, COL7A1, IER3	Down-regulated
DORN_ADENOVIRUS_INFECTION_32HR_dn	0.567365	0.719444	0.288931	0.936562	4387	37	FUBP1, SYNCRIP, HNRNPH1, CCND1, SRSF1, SDCBP, EPHA2, KRT19, SERPINB5, RAB1A, TRAF4, FHL2, TXNRD1, SRSF5, EWSR1	Up-regulated
DORN_ADENOVIRUS_INFECTION_48HR_dn	0.66902	0.79471	0.268282	0.874393	5210	38	FUBP1, SYNCRIP, HNRNPH1, CCND1, SRSF1, SDCBP, CCNK, EPHA2, KRT19, SERPINB5, RAB1A, TRAF4, FHL2, TXNRD1, SRSF5, EWSR1	Up-regulated
DORSAM_HOXA9_TARGETS_up	0.0266615	0.0758484	0.474413	1.52106	204	35	ARL3, MYB, CDK7, ETS2, ARHGAP11A, PCMT1, AHCYL1, SRSF11, GNG10, HNRNPU, RPL27A, CELF1, DHX8, MAFG, CTH	Up-regulated
DORSAM_HOXA9_TARGETS_dn	0.0757035	0.173971	0.441876	1.38342	572	31	KRT18, SDC4, MYC, SRP72, VHL, SRSF11, TPR, SDCBP, JUN, CISH, GATA2	Up-regulated
DORSEY_GAB2_TARGETS_up	0.0100725	0.0344456	-0.446054	-1.67522	24	30	GSN, IL13RA2, SMAD7, CD69, ARHGAP25, AKAP12, GNG11, THBS1, SPARC	Down-regulated
DOUGLAS_BMI1_TARGETS_up	0.074498	0.171973	0.271849	1.16593	741	533	SCD, TOMM34, CDKN3, GLO1, PDP1, RAB11FIP1, TMEM41A, CNIH4, TRMT6, B4GALT5, CYB5B, LSM7, FAM83D, GTF3A, SLC29A1, SPTLC1, TYSND1, CHEK1, MYBBP1A, GNL2, PRC1, SGTA, RPS19BP1, GRPEL1, MTURN, KDM1A, KIF20A, NUP93, NPAS2, OSGIN2, NDUFA5, BET1, HYOU1, E2F3, SNORD41, POLD3, MYB, GDI2, ZNF92, PPIF, DHX9, ATF1, OBSCN, GPN1, PCGF1, ANKH, KPNA1, LANCL2, RASL10B, IPO11, MTHFS, HUNK, NUP43, PNP, KIF11, HMGB2, …	Up-regulated
DOUGLAS_BMI1_TARGETS_dn	0.0225179	0.0664423	0.308309	1.2927	219	304	DNAJC16, SKP2, TMEM63A, RSC1A1, FAM91A1, MPV17, INSIG1, ARL6IP1, NEU1, CHEK1, RPIA, ZDHHC4, RPRD1B, MIS18A, TIGD1, SERINC3, INSIG2, S100PBP, AZIN1, ANAPC1, CHUK, PANK1, FRK, MFSD14B, WEE1, VPS36, FZD6, GNPDA1, TSPAN31, KLHL18, FGGY, FAM234A, COG5, DCAF12, KLHDC10, ELAVL1, ENPP1, SARAF, STYXL1, PIP4K2C, CCZ1, YIPF4, RBCK1, PGM2L1, CD2AP, PSMB9, MR1, TOR1B, ARL5B, IL32, CYB561A3, PCMTD1, MRGPRX3, E…	Up-regulated
DUAN_PRDM5_TARGETS_up	0.984312	0.99236	0.16811	0.616206	8344	75	MYC, E2F3, MYB, CKLF, WNT10B, ETS2, POU5F1	Up-regulated
DUNNE_TARGETS_OF_AML1_MTG8_FUSION_up	0.100355	0.214454	-0.304759	-1.27876	197	48	LIN7A, IL6R, FNBP1, CMTM3, CTSG, PLAC8, ITM2C, LAPTM5, LCP1, ICAM3, CXCR4, LST1, PTGER4, NKG7, SRGN, SAMSN1, SLA	Down-regulated
DUNNE_TARGETS_OF_AML1_MTG8_FUSION_dn	0.00140154	0.00705831	-0.60127	-1.9946	3	19	FOSL2, ID1, TSPAN7, BAALC, IFI16, RUNX1T1, MEF2C, ECM1	Down-regulated
DURAND_STROMA_NS_up	0.108727	0.227073	-0.219227	-1.156	75	164	HIVEP2, JAM2, ADAMTSL3, GREM1, CA12, MT1X, LPCAT4, TMEM109, TLE4, CPA6, CTSK, UCP2, CEP126, RAB6B, HHAT, RCOR2, NREP, PARM1, GPX7, ZSWIM6, WNK3, FEZ1, GPR176, CTSC, GCH1, NAIP, VSTM5, PIK3R5, NANOS1, FZD7, BRINP3, FBLIM1, HAVCR2, ARNT2, PCDH9, OSR1, UNC5B, CTSL, DCN, GREM2, DMPK, SLC4A8, GLIPR1	Down-regulated
DURAND_STROMA_S_up	0.0037037	0.0153035	-0.370146	-2.07002	0	289	FAT4, SVEP1, PDE4D, SLC4A4, HSPB8, GRIA3, SFRP2, IL1RL1, MEDAG, CCDC80, MAP9, LOXL1, LPAR1, PDK4, FGF10, CD248, NOVA1, SERPINF1, PDGFRA, MATN2, ZDHHC15, ARHGAP28, PTN, CXCL12, NFATC1, CDK18, EFNA5, PTPRF, B3GALNT1, NID2, MMP2, ADGRL2, OSMR, MAF, SNAI2, S1PR1, IGF1, NCAM1, NCKAP5, RGS4, ADAM19, PLXNA2, MOGAT2, KCNA4, A4GALT, PLPP1, RBPMS2, PTX3, IL1R1, ROR2, PLPP3, RASSF2, HTRA3, MN1, CREB3L1, ITM…	Down-regulated
DURCHDEWALD_SKIN_CARCINOGENESIS_up	0.0984061	0.210975	-0.260104	-1.21994	141	81	ADH1B, HSPB8, PLEKHH2, CA2, SLC15A2, MMRN1, PRKCB, MT1X	Down-regulated
DURCHDEWALD_SKIN_CARCINOGENESIS_dn	0.645502	0.775782	0.226063	0.939008	6241	259	RAB11FIP1, PIP5K1B, MET, STK3, NSDHL, ITGA6, YWHAZ, ESD, HOOK1, CDC40, LETMD1, PAK1, FARSB, ADNP, UCK2, LIN9, TMEM248, SLPI, SLC6A20, ATP2C1, PTBP3, ODC1, ABCC1, SPRED3, HS3ST1, SMURF1, MMP3, LARP4B, SQLE, EEA1, RAB22A, PFN1, CEP350, ENAH, HMGCS1, PLPP6, LRP8, ATP13A3, CMTM4, GPR137B, GM2A, CPNE2, CHI3L1, PTPN12, RANBP9, N4BP1, CCNG1, MED13, ZNF131, DCUN1D3, RBBP4, DEDD, BLCAP, TWF1, PIAS1, MYO5B…	Up-regulated
DUTERTRE_ESTRADIOL_RESPONSE_24HR_up	0.000102281	0.00109167	0.626632	2.62973	0	310	TFDP1, CDCA7, TPX2, ANLN, RAD54B, PLK1, PTTG1, DSN1, BRCA2, POLQ, SLC7A5, CCDC34, XRCC2, PRR11, ATAD2, CDCA5, SKA3, MKI67, E2F8, CDC6, SKP2, BUB1, CHAF1B, STIL, MELK, AURKA, CDK1, CCNA2, RBL1, FANCD2, TTK, UBE2C, TRIP13, EXOSC2, CEP55, GGH, BRCA1, RPA3, ARL3, MTHFD1, TOP2A, RFC2, PDSS1, UBE2T, GINS2, KIF23, DUT, GINS1, CENPM, RFC4, CDK2, CENPN, POLA1, FAM83D, MCM10, RAD54L, NCAPG2, DDX10, SUV39H2…	Up-regulated
DUTERTRE_ESTRADIOL_RESPONSE_24HR_dn	0.86731	0.928826	0.201391	0.862027	8627	487	CLDN1, FNBP1L, CD46, MACC1, PDP1, DNAJC15, PARP12, KLF5, TRA2A, CDKN2A, KDM7A, LMO7, SIM2, CD47, LRIF1, HBP1, CDH3, ZNF12, NPAS2, UBLCP1, OSGIN2, LGALS8, ZKSCAN1, LPCAT2, ANXA3, ANO6, SLC39A10, CDK6, ENC1, EPB41L5, PPARG, ARHGAP12, TM4SF1, PAWR, SRI, CYB5R1, MIOS, PRSS8, UBE2H, MME, S100A10, TAX1BP1, UBP1, TMEM45B, CLDN4, CTSH, SESN2, HILPDA, TMPRSS2, PLA2R1, SMYD2, SLC17A5, CAB39, PHACTR2, RAP1G…	Up-regulated
DUTERTRE_ESTRADIOL_RESPONSE_6HR_up	0.000104428	0.00109167	0.492464	2.02669	0	221	CDCA7, SLC7A5, XRCC2, RRS1, DKC1, NIP7, CDC6, NOLC1, RBL1, WDR4, ABCE1, DDX21, BRCA1, SLC7A1, LYAR, ARL3, GART, GINS2, MYC, NOP56, MCM10, AMD1, HSPD1, DDX10, SLC29A1, TPD52L1, CELSR2, CHEK1, MYBBP1A, PCNA, BRIP1, DPM2, POLE2, TMA16, E2F1, MYB, PAICS, MCM8, PPIF, TMEM64, IL17RB, PRIM1, TMEM120B, SEH1L, ANKH, AKAP1, WDR3, SFXN2, TFAP4, RFC3, FRK, RAPGEFL1, EXO1, MCM3, WDR76, LDLRAD3, SLC19A2, CCNE2…	Up-regulated
DUTERTRE_ESTRADIOL_RESPONSE_6HR_dn	0.0925645	0.202208	-0.256886	-1.22099	121	87	SSBP2, RCAN1, EFEMP1, EPAS1, TGFB3, NR3C1, ERBB4, IL1R1, HCAR1, LIMA1, KIAA0513, ITGB6, TGFB2, RND1, TP53INP1, KYNU, RNF144B, KAT2B, FGF13, CDKL5, CLEC2D, BMF, NPNT	Down-regulated
DUTTA_APOPTOSIS_VIA_NFKB_up	0.613943	0.753394	0.285928	0.906385	4684	33	XIAP, BIRC5, CD274, TNFRSF10A, TNFRSF21, BCL2A1, FTH1, BAX, SCAF11, TRAF2, TNFRSF10B, BNIP3	Up-regulated
EBAUER_MYOGENIC_TARGETS_OF_PAX3_FOXO1_FUSION_up	0.0202737	0.0612737	-0.352547	-1.47928	39	48	PALMD, ACTA2, AEBP1, TAGLN, FHL1, MYBPH, MYOM1, TNNC1, MEF2C, CASQ2	Down-regulated
EBAUER_TARGETS_OF_PAX3_FOXO1_FUSION_up	0.212613	0.371265	-0.202789	-1.08545	117	192	PALMD, PYGM, HBA1, TNFAIP2, FOSL2, ACTA2, PNOC, WWTR1, LIF, NCAM1, EPS8L1, AEBP1, GHRHR, GNAI2, TAGLN, QKI, FHL1, MYBPH, EPB41L3, SPDEF, ARHGEF6, INPP4B, C1R, P3H4, AMPD1, MYOM1, TNNC1, MEF2C, CALCRL, HRH1, CASQ2, IGFBP4, GSTA1, AK1, TP63, SCN3B, DNAJC7, DCN, RUSC2, TXNIP, CHODL, DMPK, SGCD, CELA3B, PAN2, GRIN1, STK10, COL1A1, MYBPC2, PRKCQ, ING4, MRAS, MYH3, AHNAK2, ACHE, GNAO1, SRGAP3, TPM1, AL…	Down-regulated
EBAUER_TARGETS_OF_PAX3_FOXO1_FUSION_dn	0.357632	0.534127	-0.253168	-1.05343	730	46	PDZRN3, ARHGAP25, ADAM19, VWA5A, FGFR2, BMP5, PIPOX, MTUS2, GOLGA2, ASTN2	Down-regulated
EGUCHI_CELL_CYCLE_RB1_TARGETS_up	0.000137344	0.00109376	0.707002	2.06013	0	22	BUB1, CCNA2, KIF20A, CDC25C, KIF18A, KIF11, HMGB2, MCM3, CDCA8, CCNE2, FEN1, SMC2, MCM7, SMC4	Up-regulated
EHLERS_ANEUPLOIDY_up	0.668176	0.79434	0.269739	0.870843	5164	36	RPF2, TUBGCP3, RABGGTB, ATR, CWC27, RPL9, EEF1A1, MRPS25, CLK4, FKBP3, PTEN, SCAF11	Up-regulated
EHRLICH_ICF_SYNDROM_dn	0.13413	0.264525	-0.427806	-1.31503	403	15	TNFRSF17, IGHA1, ID3, MEF2C, ITGB7, CD27, UBL5P4, BTG2	Down-regulated
EINAV_INTERFERON_SIGNATURE_IN_CANCER_up	0.633302	0.76768	0.294191	0.88614	4662	26	UBE2L6, LY6E, EIF2AK2, CMTR1, ISG15, IFI6, TGIF1, STAT1, SP100, OAS1, MX1, IFIT3	Up-regulated
ELLWOOD_MYC_TARGETS_dn	0.00254777	0.0114191	0.520023	1.71266	19	40	TMEM97, LAMTOR2, PDIA6, PEX2, EZR, ANAPC16, CLDN4, TMPRSS2, GANAB, UFC1, RNF149, ERP44, FKBP2, ORMDL3, ALDH2, IDE, TMEM170A, NME3, PROM1, EGF, DNAJC10	Up-regulated
ELVIDGE_HIF1A_AND_HIF2A_TARGETS_up	0.013641	0.0440938	0.48167	1.57924	106	39	HSPH1, RRS1, SLC29A1, LSG1, SRM, CHUK, HSPA4, OSTM1, ABCF2, AUNIP, AREL1, STX3, SLC5A6, WDR77, SPAG1, TAF9B, RRP12, FLAD1	Up-regulated
ELVIDGE_HIF1A_AND_HIF2A_TARGETS_dn	0.320977	0.492661	-0.21711	-1.05587	380	100	WSB1, LOXL1, CSRP2, ANG, CITED2, EGR1, DST, AKAP12, PLAC8, HLA-DRB1, FOS, OBSL1, ATXN1, VEGFC, LOX, PGM1, GJA1, SRPX	Down-regulated
ELVIDGE_HIF1A_TARGETS_up	0.000239234	0.00177041	0.504711	1.80855	1	64	HSPH1, SEC23IP, RRS1, AMD1, SLC29A1, TMEM33, RRP15, LSG1, SRM, DNAJA1, KPNA1, CHUK, HSPA4, OSTM1, ABCF2, AUNIP, AREL1, DOLK, GLYR1, STX3, SLC5A6, SLCO3A1, WDR77, SPAG1, IDE, TAF9B, GPATCH2, CTPS1, PNO1, RRP12	Up-regulated
ELVIDGE_HIF1A_TARGETS_dn	0.504552	0.668492	-0.207702	-0.987217	664	87	WSB1, LOXL1, CSRP2, ANG, CITED2, NR3C1, HLA-DRB1, FOS, OBSL1, ATXN1, VEGFC, LOX, PGM1, GJA1, SRPX, MAFF	Down-regulated
ELVIDGE_HYPOXIA_up	0.952166	0.9718	0.18015	0.72323	8857	164	MET, INSIG2, ZMYND8, AK4, P4HA1, BCOR, RRAGD, ASPH, HEY1, S100A6, STC1, HILPDA, RBCK1, VLDLR, HCFC1R1, SLCO4A1, JUN, SRD5A3, KRT15, OLFML2A, CA9, GPRC5A, PLAUR, NAP1L1, ARTN, MXI1, FAM162A, NDRG1, EGFR, RASA4, SOX9, INHA, IGFBP3, SFXN3, CYB5A, ADGRE2, EFNA3, ERO1A, PFKFB3, S100A4, KDM3A, STC2, GBE1, KLHL24, KLF6, ILVBL, KRT7, ATF3, PPFIA4, NOL3, TGFBI, DDIT4, CEMIP, UPK1A, BNIP3, PIM1, ISG20, YEA…	Up-regulated
ELVIDGE_HYPOXIA_dn	0.000109433	0.00109167	0.450496	1.77917	0	139	HSPH1, SEC23IP, STIP1, NIP7, EEF1E1, CENPN, AMD1, SLC29A1, TMEM33, RRP15, SORT1, TFAP2C, BOP1, ALDH4A1, SRM, PPIF, KPNA4, LARP4, DNAJA1, NDUFS6, EIF5A, KPNA1, CHUK, HSPA4, ZWILCH, ODC1, HNRNPH1, OSTM1, ABCF2, ARPC4, AUNIP, QRSL1, SRSF1, DHX29, AREL1, SNRNP40, CDC20, HSF1, TIMM23, DOLK, GLYR1, GLUD1, ADGRG1, DCTN5, STX3, SLC5A6, EXOSC4, BAK1, SLCO3A1, FUS, WDR77, CDV3, SPAG1, IDE, POLR3E, COPA, TA…	Up-regulated
ELVIDGE_HYPOXIA_BY_DMOG_up	0.801523	0.885836	0.212078	0.830611	7264	128	MET, INSIG2, AK4, P4HA1, RRAGD, ASPH, HEY1, S100A6, STC1, HILPDA, RBCK1, MGAT5, VLDLR, SLCO4A1, JUN, SRD5A3, OLFML2A, CA9, GPRC5A, PLAUR, NAP1L1, ARTN, MXI1, FAM162A, NDRG1, EGFR, SOX9, INHA, IGFBP3, SFXN3, CYB5A, ERO1A, PFKFB3, S100A4, KDM3A, STC2, GBE1, KLHL24, KLF6, ILVBL, ATF3, PPFIA4, TGFBI, DDIT4, CEMIP, BNIP3, PIM1, ISG20, YEATS2	Up-regulated
ELVIDGE_HYPOXIA_BY_DMOG_dn	0.389583	0.564626	0.30198	1.05266	3178	55	CENPN, SLC29A1, ALDH4A1, SRM, NDUFS6, HSPA4, ODC1, SRSF1, DOLK, ADGRG1, SLC5A6, SLCO3A1, WDR77, SPAG1, IDE, TAF9B, GPATCH2, CTPS1, ZMPSTE24	Up-regulated
ENGELMANN_CANCER_PROGENITORS_up	0.422095	0.596153	0.302561	1.02962	3388	48	SLC7A5, RRS1, BZW2, CDC14B, ANXA9, GDPD5, THBD, PDPK1, GALNT6, LACTB, LMCD1, IGFBP3, ARID4B, FHL2	Up-regulated
ENGELMANN_CANCER_PROGENITORS_dn	0.742387	0.848574	-0.197422	-0.881695	1218	64	GSN, SGK1, SCUBE2, ID1, EVL, TRPV4, BMP5, HS3ST3A1, ADCY1, TFF3, TXNIP, SLC35C1, IL4R, DVL3, ST6GALNAC2	Down-regulated
ENK_UV_RESPONSE_EPIDERMIS_up	0.00010268	0.00109167	0.393341	1.64325	0	285	CSE1L, ATIC, PSMB2, HMGB1, SNX7, SLC25A13, SRSF7, PDSS1, GSTO1, STAMBP, BCL11A, CCT7, PRDX3, EIF4EBP1, COPS7B, EHMT2, VRK2, POLR3G, CD47, MRPS31, DSG2, CDH3, PREB, STK39, PRKAG1, S100P, AIMP2, HYOU1, PGAM1, ANXA3, PHB, EBNA1BP2, SRM, ACTL6A, PRIM1, AIFM1, STK25, POLR2G, LSR, ESPL1, ACP6, PTBP3, PLXNB1, NUDT4, TBP, PAFAH1B3, EHF, NPIPB3, SULT1A2, APEH, SLC16A1, RUVBL2, HILPDA, PPIH, CSTF2, ITGAE, …	Up-regulated
ENK_UV_RESPONSE_EPIDERMIS_dn	0.669247	0.794774	0.22122	0.947052	6656	497	CLDN1, HSPH1, SLC7A5, DDAH1, PON2, CHORDC1, STAM, NUFIP1, DDX21, TFRC, B4GALT5, RNPS1, BCL11A, DBF4, DDX10, DNAJB1, HOOK1, GNL2, DBI, PRC1, OXSR1, CSNK2A2, GJB3, CDH3, ITGA2, MED4, SYNCRIP, UCK2, GSPT1, CDK7, KPNA4, MBTPS1, B3GNT2, ZNF207, ASS1, NBR1, HSPA1A, PNP, ATF6B, EZR, RAPGEFL1, PTBP3, ODC1, UBE2H, CYP2J2, PITPNB, BCL10, EHF, CCL20, CCND1, CTSH, ANXA9, CUTA, VPS41, MRPS30, HS3ST1, DCP1A, D…	Up-regulated
ENK_UV_RESPONSE_KERATINOCYTE_up	0.000100472	0.00109167	0.410023	1.75594	0	507	KRT18, RPL8, PMS2P3, STOML2, EIF6, RPS21, RPS5, KLF5, HSP90AB1, SDC4, BUD31, RFC2, CCNC, RPL35, AMD1, IFRD1, NEU1, YWHAZ, ATP6V0B, EMD, RPL10A, EIF3C, POLB, RPL14, RAE1, RPL18, GJB3, HBP1, DPM2, DGAT1, SLC3A2, PSMB4, ZNHIT1, RAC1, ATP6V0C, PPP4C, RER1, S100A11, KRT8, RPL29, TMF1, PPIF, SNRPB, IDH3B, CYC1, PMEL, KPNA4, OAZ1, STX16, RPL18A, DNAJA1, TROAP, TIMM44, RPS9, B2M, PSMB3, MLF2, TUFM, RPL12…	Up-regulated
ENK_UV_RESPONSE_KERATINOCYTE_dn	0.000100695	0.00109167	0.478394	2.04431	0	462	TPX2, CSE1L, PFDN4, CD46, HSPB11, CYP51A1, UMPS, DKC1, HSPE1, PSMG1, NOLC1, USP1, TM9SF2, ABCE1, UBE2C, TRIP13, RPA3, SNX7, CDC123, MTHFD1, TOP2A, STAU1, STK3, SYPL1, C1D, DUT, TGDS, CYB5B, CDK2, CBX3, EEF1E1, HSPD1, TERF1, DEK, TARBP1, USP7, LBR, CELSR2, SLBP, XPO1, CUL1, EIF4H, RPP38, GTF2F2, AKAP11, SLC11A2, SSB, PAK1, HNRNPA0, MKRN1, BET1, URI1, EIF3J, SNRPG, MSMO1, DLEU1, PAICS, PHB, HNRNPR,…	Up-regulated
EPPERT_CE_HSC_LSC_up	0.0939153	0.204297	-0.332138	-1.32046	212	37	PLSCR4, SMARCA1, CACNB2, HOXB3, BAALC, INPP4B, ABCB1, SOCS2, DAPK1, ERG, FLT3	Down-regulated
EPPERT_HSC_R_up	0.743427	0.84913	0.222285	0.861849	6672	115	RSL1D1, BCL11A, PTK2, INSIG1, RLIM, MSMO1, SLC25A36, OGT, ASXL1, IPO11, KSR1, PNP, TMEM200A, EIF5, DACH1, OSER1, JUN, TMEM38B, RPL31, MYO5C, DNAJB9, TPT1, SLC17A9, HOXB2, RBM7, PAN3-AS1, ALCAM	Up-regulated
EPPERT_LSC_R_up	0.0752167	0.173285	0.418267	1.37136	589	39	ARL3, NIPAL2, ATXN7L3B, TGIF2, ARFGEF1, PNPLA4, PPIG, ADGRG1, UBR5, NAB1, LRRC61, PAQR6, CDIP1, CLN5, CDK12, SETDB1, ZFP30, KLF3-AS1, PTCD2	Up-regulated
EPPERT_PROGENITOR_up	0.000109926	0.00109167	0.604491	2.37502	0	131	TMEM97, MIPEP, SCD, DDAH1, UMPS, NDC1, STAM, SORD, HMGB1, TRIP13, TFRC, BMS1, GINS2, DUT, EIF5B, POLA1, EIF2AK1, HBS1L, PHF6, PLK4, CCNB2, METAP2, LRPPRC, MTHFD2, CHEK1, RMDN1, PDZD8, POLE2, TIPIN, CCNJ, CKAP5, LDHB, PAICS, CDK7, HNRNPR, PRKDC, CTNNBL1, HMGXB4, CDK6, SUPT16H, LANCL2, CSNK2A1, RFC3, EIF2S1, TM9SF3, ODC1, HSP90AA1, MSH3, AHCYL1, FBXO7, TPR, LHFPL2, RRM1, HAUS6, NOMO1, MINPP1, ARMC8…	Up-regulated
FAELT_B_CLL_WITH_VH_REARRANGEMENTS_up	0.694733	0.813911	0.25452	0.861719	5552	47	SAP18, PIP5K1B, SRSF2, SNU13, RAB6A, CAPZA2, YIF1A, MXI1, EFR3A, ZBTB20, DUSP7, SUN1	Up-regulated
FAELT_B_CLL_WITH_VH_REARRANGEMENTS_dn	0.0828248	0.185339	0.394871	1.34376	664	48	GLO1, LYRM1, GTF3A, XPO1, DDX1, HSPA4, PARP4, SOD1, HNRNPU, TMEM147, PRPS1, DDX19A, TGOLN2, LDOC1, YWHAQ, DEFA1, VPS13B, PFN2	Up-regulated
FAELT_B_CLL_WITH_VH3_21_up	0.0277988	0.0784537	0.444746	1.48055	219	43	VDAC1, YKT6, PPP5C, HMGA1, TOMM40, KCNAB2, PRRC2A, CALR, ACTN4, E2F4, VCP, DVL1, TYMS, MLH1, SMARCD1, POR, CNOT3, SRC, ARHGEF1, CDK16	Up-regulated
FAELT_B_CLL_WITH_VH3_21_dn	0.0132021	0.042977	0.456477	1.5534	105	48	SAP18, COX7A2, PLP2, MKRN1, YWHAB, DDX1, RNF13, TSPO, PUM1, CTNNA1, HEBP2, DDX19A, SERP1	Up-regulated
FALVELLA_SMOKERS_WITH_LUNG_CANCER_up	0.489267	0.654108	0.267799	0.989165	4170	79	UFM1, MVD, HSP90AB1, MET, HSPD1, USP10, TOP1, SUPT16H, EZR, CCL20, STC1, CTNNA1, AZGP1, MAT2A, RAB12, RASEF, CRTC1, FER, FUS, MMP1, HOXC8, EIF1, ACTR2	Up-regulated
FARDIN_HYPOXIA_11_up	0.408488	0.582487	0.330983	1.04338	3108	32	AK4, TPI1, MXI1, FAM162A, NDRG1, IGFBP3, KDM3A, PFKFB4, DDIT4, BNIP3	Up-regulated
FARMER_BREAST_CANCER_APOCRINE_VS_BASAL_up	0.000102093	0.00109167	0.377659	1.58748	0	319	KRT18, SCD, PFDN4, CERS6, MKI67, CYP51A1, STIL, MELK, PON2, STOML2, STK26, UBE2C, CEP55, KLF5, C1QBP, TOP2A, MYC, KIF23, TMEM41B, FBL, GINS1, CDKN2A, BCL11A, TRMT11, SC5D, CDH1, ERLIN2, LBR, AKR1A1, DBI, PDCD5, CRIPT, KIF20A, PIK3R1, SYNCRIP, CYP4F8, HACD3, SEC23B, E2F3, MSMO1, SPTLC2, ZKSCAN1, LDHB, NEDD4, UPF3B, PUM3, ZMYND8, IDI1, AK4, KIF11, FMR1, P4HA1, ETFB, ZWILCH, PREP, SLC35A3, SLC19A2, …	Up-regulated
FARMER_BREAST_CANCER_APOCRINE_VS_LUMINAL_up	0.12926	0.258275	0.278894	1.17041	1262	313	CLDN1, SCD, UCHL3, PON2, SCCPDH, ARL3, MPP6, EIF4EBP1, PDZK1IP1, AGFG1, GMPS, AKR1A1, DBI, ZDHHC4, DHCR7, STK39, SEC23B, MSMO1, SPTLC2, TUBA4A, PPIF, MANSC1, SLPI, ASS1, NBR1, RMND1, AK4, NPEPPS, SLC31A1, PNP, MORC4, P4HA1, OAZ3, ETFB, CYP2J2, YBX1, REEP5, TMPRSS2, CXCL8, ANXA9, SEPHS2, PI3, VLDLR, MPHOSPH9, CTBS, AZGP1, YAP1, SUZ12, HEBP2, TRAF5, GALNT3, FAR2, MYL6B, ECHDC1, U2SURP, HMGCS1, DDC,…	Up-regulated
FARMER_BREAST_CANCER_BASAL_VS_LULMINAL_up	0.000102062	0.00109167	0.371476	1.56137	0	318	TPX2, KRT18, PTTG1, CERS6, DKC1, SKP2, BUB1, STIL, MELK, RAD51AP1, SCCPDH, TTK, KLF5, MPP6, PDSS1, MYC, CCNC, CDKN2A, BCL11A, TRMT11, MCM10, AMD1, IFRD1, HDAC2, GMPS, LBR, MTHFD2, CHEK1, MMP12, REEP1, MCCC2, MAGOH, SYNCRIP, SEPHS1, E2F3, LGALS8, SPTLC2, MYB, KRT8, LDHB, ACTL6A, TMEM123, PUM3, ARMT1, RIF1, EIF1AX, SLC39A6, NFE2L3, NUDT4, FBP1, SLC19A2, CPD, YBX1, SLC9A6, ATG5, REEP5, TTLL4, SLC16A…	Up-regulated
FARMER_BREAST_CANCER_CLUSTER_1_up	0.000480538	0.00305936	-0.493047	-2.02249	0	44	TNFRSF17, IGHA1, CYTIP, GPR171, IGKV3-20, IGLL3P, JCHAIN, IFIT1, CD48, CCR2, MZB1, IGLV2-14, IGKV1D-13, HERC6	Down-regulated
FARMER_BREAST_CANCER_CLUSTER_2_up	0.000131044	0.00109167	0.737251	2.33707	0	33	TPX2, RAD54B, PTTG1, RRS1, ATAD2, BUB1, MELK, CCNA2, CEP55, CCNB2, PRC1, KIF20A, NCAPG, SLC25A32, PRKDC, ESRP1, KIF11, MTERF3, MRPL15, KIF15, MTFR1, MAD2L1, ARMC1, NUSAP1, RB1CC1, ASPM	Up-regulated
FARMER_BREAST_CANCER_CLUSTER_3_up	0.00712149	0.0260161	0.633568	1.71009	49	16	CLDN1, MPP6, PDZK1IP1, AGFG1, SLC31A1, VLDLR, NDRG1, EGFR, PEX3, ERO1A	Up-regulated
FARMER_BREAST_CANCER_CLUSTER_4_up	0.000350385	0.0024511	-0.658698	-2.18511	0	19	SERPINF1, FBN1, NID2, CTSK, AEBP1, HTRA1, COL5A1, SPARC, PCOLCE, COL1A2, FILIP1L	Down-regulated
FARMER_BREAST_CANCER_CLUSTER_5_up	0.0587577	0.143863	0.516485	1.45643	419	19	SMARCD2, RAD51C, RNF43, DCAF7, SMG8, MED13, FTSJ3, SUPT4H1, DHX40, TRIM37, TACO1, POLG2	Up-regulated
FARMER_BREAST_CANCER_CLUSTER_7_up	0.314517	0.487121	0.391893	1.11818	2250	20	SCD, TMEM41B, CDH1, SLC35A3	Up-regulated
FERNANDEZ_BOUND_BY_MYC_up	0.000106655	0.00109167	0.438171	1.7697	0	178	BRCA2, DKC1, HSPE1, TFRC, MET, AMD1, HSPD1, ITGA6, SIM2, LBR, TXN, AKR1A1, SLBP, POLB, STMN1, ACAD10, E2F1, PAICS, PHB, PRKDC, VHL, HNRNPA2B1, NME1, PPID, TOP1, PDHA1, SYNGR2, AKAP1, ATF4, MYBL2, CLNS1A, ETS2, HSPA8, RPL22, SLC4A2, UROD, THRA, ENO1, PTMA, RPS6, PI3, HNRNPA1, UBA52, JUN, PSMB1, ZNF146, ELK1, ARF1, MCM7, SLC19A1, RPL27A, RPL13A, PPP1R7, EIF4A1, POLD2, BSG, CEACAM5, ALDH2, IFRD2, NR…	Up-regulated
FERRANDO_HOX11_NEIGHBORS_up	0.199479	0.355341	0.416573	1.22309	1454	23	CCNA2, MTHFD1, TOP2A, STMN1, MME, HPRT1, UNG, TYMS, RPA1, ERCC1, CD1B, TK1, TLX1, CD1A	Up-regulated
FERRANDO_LYL1_NEIGHBORS_up	0.702464	0.820046	0.30744	0.829823	4931	16	APEX1, IL9RP3, MYCN, TNFRSF1A, CCND2, RHOA	Up-regulated
FERRANDO_T_ALL_WITH_MLL_ENL_FUSION_up	0.418615	0.593436	0.277231	1.03047	3597	83	SLC7A5, VDAC1, CBX3, CD47, PRDX1, HYOU1, SERINC3, SPOCK2, MME, PRSS3, CTSH, TCF7, IL32, FKBP2, DSTN, YBX3, CAPRIN1, RALGDS	Up-regulated
FERRANDO_T_ALL_WITH_MLL_ENL_FUSION_dn	0.000116428	0.00109167	0.583894	2.16787	0	82	CSE1L, PSMA2, PSMB2, GOT2, SORD, UBE2C, C1QBP, TOP2A, MYC, DUT, CDK2, SLC29A1, LBR, TXN, PCNA, PLP2, NUP93, RPS4Y1, PGAM1, VBP1, RANBP1, USP10, COX8A, HMGB2, HMGA1, PSMA6, AP3S1, BCLAF1, UBE2S, DOCK2, TFDP2, RRM1, SRSF3, BARD1, HINT1, HPRT1, POLD2, SLC1A5, PPP2R2A, GAPDH, KHSRP, EIF3B, POLA2, TYMS, S100A4, KPNB1, EEF1D	Up-regulated
FERRANDO_TAL1_NEIGHBORS_up	0.136821	0.268911	0.467264	1.31763	977	19	DTYMK, MYBL2, TRAC, FCGR3B, TCF7, TNFRSF1B, BCL2A1, FOLR1, LGALS3, CD3E	Up-regulated
FERRARI_RESPONSE_TO_FENRETINIDE_up	0.200443	0.356231	0.424962	1.2264	1447	21	SLC7A5, CXCL3, CCL20, GPRC5A, IRF1, TRIM33, SEMA3C, SELE, ATF3, DDIT4, CXCL2	Up-regulated
FERREIRA_EWINGS_SARCOMA_UNSTABLE_VS_STABLE_up	0.000107898	0.00109167	0.616386	2.46447	0	156	TPX2, ANLN, CCT6A, HJURP, CDKN3, ATAD2, KPNA2, NDC1, CDC6, MELK, CCNA2, PARPBP, FANCD2, CEP55, BRCA1, LSM5, CKAP2, RPA3, TOP2A, UBE2T, DAZAP1, PTTG3P, KIF23, POLR2F, MRPL20, DBF4, PROSER1, SPC25, NCAPG2, TMPO, XPO4, CCNB1, CENPF, DHFR, CHEK1, TBC1D31, BRIP1, RAN, POLE2, CENPK, SYNCRIP, GPAT4, NCAPG, NAA15, MRPL51, EP400, ESF1, LARP4, DLGAP5, KIF18A, SLCO5A1, PINX1, ESPL1, CEP83, HMGB2, DAP3, NDUF…	Up-regulated
FERREIRA_EWINGS_SARCOMA_UNSTABLE_VS_STABLE_dn	0.924543	0.957838	-0.166056	-0.795184	1163	91	LYVE1, AAK1, ANGPTL3, C9orf78, CHRDL1, UBASH3A, COX7A1, GNG7, PCDH11Y, ECHDC2, INMT, FAM219B, CT62, FBXL15, CYLD	Down-regulated
FEVR_CTNNB1_TARGETS_dn	0.000100392	0.00109167	0.564646	2.42228	0	535	COA6, TFAM, BRCA2, DIAPH3, EZH2, CDKN3, EIF2S2, RRS1, KPNA2, PA2G4, MKI67, UCHL3, SNRPB2, EPHB2, EIF3E, CDC6, SKP2, BUB1, CHAF1B, MELK, SLC12A2, CDK1, CCNA2, RAD51AP1, NOLC1, USP1, TM9SF2, TTK, HMGB1, PRIM2, TRIP13, DDX21, CCT5, BRCA1, LSM5, CKAP2, TRMT6, MTHFD1, TOP2A, CCT2, GART, SDC4, RFC2, SRSF7, SNX5, LYPLA1, MRPL13, TRIM27, KIF23, FBL, GINS1, RFC4, MOGS, XRN2, NOP56, POLA1, TRMT11, RAD54L, …	Up-regulated
FIGUEROA_AML_METHYLATION_CLUSTER_1_up	0.545015	0.701342	-0.194685	-0.973138	562	117	DAAM2, FSTL1, HTR2A, MAP7D3, RECQL5, CLIC2, MOS, DOK6, PCDHB16, CYP26C1, VWA5A, GDF3, GNG11, PHF13, MSRB3, SCG5, SLC38A10, ZNF281, NEUROG1, TEK, ZNF662, WBP1L	Down-regulated
FIGUEROA_AML_METHYLATION_CLUSTER_1_dn	0.131362	0.261304	0.386548	1.27807	1034	41	CDC123, NUDT5, FNBP4, PCNA, RPS18, ENTPD6, CD68, LHFPL2, CEP350, PKDCC	Up-regulated
FIGUEROA_AML_METHYLATION_CLUSTER_2_up	0.306143	0.478157	0.322679	1.1114	2476	51	CDK8, CCDC34, EXOSC2, TBC1D31, MCTS1, OAZ3, EXOSC3, RPRD2, CANT1, IL11RA, THBS4, TNPO3, ARHGAP44, PFN2, CDX4, DHRS12, ABLIM1, TIGD3, PMAIP1, GSPT2, PABPN1, ZNF667	Up-regulated
FIGUEROA_AML_METHYLATION_CLUSTER_3_up	0.203064	0.359917	0.288359	1.15293	1881	156	CDK8, CCDC34, KRTCAP3, EXOSC2, TBC1D31, GPAT4, SMIM15, IDH3B, PFDN2, MCTS1, CEP41, YTHDF2, CHCHD2, HNF4A, EXOSC3, HILPDA, POU5F1, RIPPLY3, REXO2, ZFR, ZNF343, UHRF1, KNSTRN, MKKS, SLC9A8, YBX3, LHCGR, THEM4, CASP2, CANT1, SLX4IP, PPP2CA, N4BP1, PRRG1, EREG, IL11RA, HMCES, THBS4, GTF3C1, TNPO3, ARHGAP44, PFN2, ZIC5, ISCA1, CDX4, DHRS12, BLOC1S1, ABLIM1, TIGD3, MAP7, PMAIP1, FAM83B, TLR2, APIP, PDH…	Up-regulated
FIGUEROA_AML_METHYLATION_CLUSTER_3_dn	0.599741	0.745104	0.28332	0.91469	4635	36	TMEM33, ZNF853, RHOT1, EPHA2, NECAP2, BATF2, PKDCC, KIAA2013, EIF3A, ASB10, SLC26A9, IGLJ3	Up-regulated
FIGUEROA_AML_METHYLATION_CLUSTER_4_up	0.319738	0.491527	0.283856	1.08729	2829	104	CDK8, CCDC34, STOML2, EXOSC2, CHMP4C, SMIM15, STX16, SPHK2, MCTS1, CHCHD2, OAZ3, HNF4A, EXOSC3, HILPDA, POU5F1, REXO2, LAMP1, YBX3, LHCGR, CASP2, CANT1, CXCL5, HMCES, TNPO3, PFN2, TBC1D15, LANCL1, CDX4, DHRS12, ABLIM1, TIGD3, WDR31, PMAIP1, CENPV, FAM83B, TLR2, NTN5, PABPN1, VAMP5	Up-regulated
FIGUEROA_AML_METHYLATION_CLUSTER_4_dn	0.762616	0.862275	-0.256725	-0.789146	2296	15	CTDP1, GNGT2, CSGALNACT1, PTPRS, TACR3, CCR7	Down-regulated
FIGUEROA_AML_METHYLATION_CLUSTER_5_dn	0.573636	0.724005	-0.227291	-0.940202	1187	45	TMEM37, ST6GALNAC1, C10orf82, TXNDC5, CD48, TIAM1, ASXL3, KRT76	Down-regulated
FIGUEROA_AML_METHYLATION_CLUSTER_6_up	0.513759	0.677428	0.250355	0.986786	4685	135	CCDC34, EXOSC2, PPIL6, GPAT4, SMIM15, ZCCHC14, TMEM185B, SPHK2, MCTS1, OAZ3, HNF4A, EXOSC3, SMPD2, POU5F1, RIPPLY3, REXO2, ZFR, ZNF343, RAB22A, KNSTRN, ZNF174, YBX3, CASP2, CANT1, PPP2CA, IL11RA, THBS4, TNPO3, DEPDC1B, PFN2, LANCL1, DHRS12, MRPS21, ABLIM1, TIGD3, MAP7, PMAIP1, CENPV, FAM83B, NTN5, TADA2B, PABPN1, TAF3, ZNF667, SLC7A8, ICA1L, BPGM, KRT81, OSBPL1A, KCNAB3, IFNAR2, TRAPPC1, ZNF582	Up-regulated
FIGUEROA_AML_METHYLATION_CLUSTER_6_dn	0.118398	0.242259	-0.323537	-1.27525	268	36	C10orf82, ADGRL4, CCL1, OR5T1, ASXL3, CTDP1, CSGALNACT1, DNAJC28, PLD3	Down-regulated
FIGUEROA_AML_METHYLATION_CLUSTER_7_up	0.626538	0.762346	0.238992	0.924107	5599	113	CDK8, CCDC34, TBC1D31, CHMP4C, GPAT4, SMIM15, HNRNPR, SPHK2, OAZ3, HNF4A, EXOSC3, CCDC85A, HILPDA, ZFR, MKKS, RPRD2, ZNF174, YBX3, CASP2, CANT1, SLX4IP, PPP2CA, N4BP1, IL11RA, HMCES, TNPO3, PFN2, ISCA1, DHRS12, ABLIM1, TIGD3, TGFB1I1, PMAIP1, DBNDD2, TLR2, TADA2B, PABPN1, ZNF667, CEP78, KRT81, OSBPL1A, KCNAB3, IFNAR2, TRAPPC1, ZNF582	Up-regulated
FINAK_BREAST_CANCER_SDPP_SIGNATURE_up	0.102659	0.21786	-0.381011	-1.33471	277	23	OGN, FRZB, CD48, LCP1, ITGBL1, RUNX3, ADRA2A, ADM, CXCL14	Down-regulated
FINETTI_BREAST_CANCER_KINOME_GREEN_up	0.23046	0.393036	-0.377522	-1.18971	686	16	PRKCB, MLKL, MAP4K1, STK17B, STK10, PRKCQ	Down-regulated
FINETTI_BREAST_CANCER_KINOME_RED_up	0.00014243	0.00110371	0.764839	2.06441	0	16	PLK1, BUB1, MELK, AURKA, CDK1, TTK, PLK4, CHEK1, VRK1, CDC7	Up-regulated
FINETTI_BREAST_CANCERS_KINOME_BLUE_up	0.210583	0.368878	-0.347632	-1.18295	584	21	DCLK1, EPHA10, ERBB4	Down-regulated
FINETTI_BREAST_CANCERS_KINOME_GRAY_up	0.229757	0.392274	0.454907	1.20853	1605	15	CHUK, CSNK1A1, TRIM33, MAP4K3, SLK, TWF1, NEK4, CSNK1G3	Up-regulated
FIRESTEIN_CTNNB1_PATHWAY_up	0.00581319	0.0222428	0.540468	1.69209	43	31	PLK1, CDK8, DKC1, PLK4, PDK3, STK25, KSR2, EPHA2, FER, SLK, ULK1, NRAS, DGKH, LATS1, CSNK1G3	Up-regulated
FIRESTEIN_PROLIFERATION_up	0.133663	0.26383	0.300263	1.2031	1241	160	CDK8, LIMK1, DKC1, EPHB2, ADK, STK26, STK3, CKS1B, DBF4, CHEK1, CSNK2A2, ERBB3, PIK3R1, XRCC6, XYLB, PRKDC, EPHB4, PRKAR2A, CDK6, PPARG, GUCY2C, STK24, CMPK1, APPL1, ATR, TICRR, CAMKV, TRPV6, NME6, PDXK, PRKRA, MASTL, NUCKS1, MAPK8, BRAF, INPP4A, PHKB, SYT5, BMPR1A, VRK3, RPS6KA4, GALK2, TERF2IP, CDK11B, CERK, MAK, SLC22A18, EXOSC10, NR1I2, STK32C, TAOK3, MAP3K8, FGFR3, TPD52L3, GZMB, AKAP4, PPAR…	Up-regulated
FISCHER_DIRECT_P53_TARGETS_META_ANALYSIS_up	0.527017	0.689361	0.236087	0.988442	5139	297	PARD6B, C12orf45, SAC3D1, MRPL39, PCNA, TMEM243, ACER2, TRUB1, SMAD5, KRT8, UQCC1, TMEM64, CPSF4, GSS, PRRG2, APOBEC3H, ANXA4, RAD51C, MLF2, POLR2H, PANK1, RCBTB1, NDUFV3, BCL10, RRM2B, PLXNB2, BBS2, TLCD1, SESN2, UTP3, NCEH1, LRPAP1, MFAP3L, DDB2, TNFRSF10A, CCDC90B, TMEM68, SCRIB, ARFGEF2, MICALL1, YAP1, TCAIM, KRT15, CEL, EPHA2, BRMS1L, E2F7, EFNB1, RPS19, RNF19B, CCNG1, TGS1, SERPINB5, CNOT6,…	Up-regulated
FISCHER_G1_S_CELL_CYCLE_up	0.000106746	0.00109167	0.479387	1.93536	0	176	CDCA7, EZH2, ATAD2, E2F8, CDC6, CHAF1B, USP1, BRCA1, KLF5, RFC2, GINS2, RFC4, MCM10, C1GALT1, CHEK1, SLBP, CENPQ, PCNA, REEP1, DCLRE1A, TMEM243, BRIP1, POLE2, TIPIN, OSGIN2, E2F1, CLSPN, POLD3, MYB, INSIG2, DCLRE1B, PAQR4, ARL6IP6, OGT, YEATS4, PRIM1, ARGLU1, TCF19, RFXAP, MBNL2, DNAJC3, SLC25A27, SLC38A2, ZRANB2, EXO1, MCM3, WDR76, ASPH, OSBPL6, FANCE, CDC7, CCNE2, RECQL4, FEN1, GK, HELLS, ACYP1…	Up-regulated
FISCHER_G2_M_CELL_CYCLE_up	0.000104232	0.00109167	0.587125	2.4214	0	227	CKS2, TPX2, ANLN, PLK1, PTTG1, HJURP, POLQ, KPNA2, MKI67, NDC1, BUB1, STIL, MELK, AURKA, CDK1, CCNA2, TTK, UBE2C, TRIP13, CEP55, CKAP2, NDE1, NIF3L1, TOP2A, KIF23, CKS1B, FAM83D, ARL6IP1, DBF4, AMD1, KIF20B, TMPO, DNAJB1, PLK4, CCNB1, CCNB2, CDC25B, LBR, FNBP4, CENPF, SFPQ, GTSE1, PRC1, CKAP2L, E2F5, CCNF, NEIL3, KIF20A, CDC25C, BIRC5, NUP35, PSMD11, CKAP5, ANXA3, ARHGAP11B, DR1, TROAP, SHCBP1, R…	Up-regulated
FLECHNER_BIOPSY_KIDNEY_TRANSPLANT_OK_VS_DONOR_up	0.000100341	0.00109167	0.382907	1.64374	0	545	SERBP1, FNBP1L, TOMM34, CD46, KPNA2, HSPB11, SAP18, HSPE1, BOLA2, PTGES3, RNF6, GOT2, TIAL1, SLC25A13, CCT2, SSBP1, SYPL1, C1D, RALA, DUT, GSTO1, TRA2A, CBX3, SLC5A3, AMD1, GTF3A, TERF1, KRIT1, DEK, TBCA, SRSF2, XPO1, HIBCH, NONO, EIF4H, SRP72, ALG8, ERBB3, RAN, DDX19B, CAPZA1, NDUFA5, RAC1, SERINC3, E2F3, TUBA1B, MAPRE1, MSMO1, SMAD5, PSMD11, HDGF, GDI2, SUB1, HNRNPR, DHX9, TMEM123, PARP1, AZIN1…	Up-regulated
FLECHNER_BIOPSY_KIDNEY_TRANSPLANT_OK_VS_DONOR_dn	0.150676	0.290174	0.432388	1.28113	1103	24	MYC, GSS, USP9X, RHBDF1, PCF11, EIF2AK2, TMEM11, PAXIP1, BLMH, BAX, USP22, BRD2, KRT7	Up-regulated
FLECHNER_BIOPSY_KIDNEY_TRANSPLANT_REJECTED_VS_OK_up	0.507174	0.670646	-0.206807	-0.978427	706	84	ACKR1, VSIG4, PRKCB, IFFO1, HCLS1, CD48, CD53, RASSF2, CD14, LAPTM5, CCL5, CD163, LCP1, CORO1A, CELF2, C1QB, IL4R, POLR2A, CXCR4, CD27, GLIPR1, MOXD1	Down-regulated
FLECHNER_BIOPSY_KIDNEY_TRANSPLANT_REJECTED_VS_OK_dn	0.000100402	0.00109167	0.359663	1.54256	0	533	SERBP1, FNBP1L, TOMM34, HSPE1, PTGES3, VDAC1, RNF6, GOT2, SORD, GGH, C1QBP, SLC25A13, LAMTOR5, SYPL1, TOX3, PRDX3, SC5D, CDH1, SLC5A3, HSPD1, TERF1, DDX10, KRIT1, ITGA6, BPHL, PDZK1IP1, ESD, LRPPRC, TXN, AKR1A1, HIBCH, NONO, AKAP11, PMPCB, PCBD1, SHANK2, ERBB3, DDX19B, SLC3A2, PIK3R1, NDUFA5, NDUFAB1, MSMO1, ALDH4A1, SLC25A36, SMAD5, PSMD11, DLEU1, HDGF, PHB, EBNA1BP2, EPCAM, RAB2A, LARP4, VDAC2,…	Up-regulated
FLECHNER_PBL_KIDNEY_TRANSPLANT_OK_VS_DONOR_up	0.000108719	0.00109167	0.514839	2.04401	0	145	PA2G4, PSMA2, ZNF384, VDAC1, TFRC, UBE2I, BMS1, LAMTOR5, RPL35, CCT7, YWHAZ, BPHL, TXN, PIK3R1, SYNCRIP, PSMB4, HAX1, URI1, HYOU1, GSPT1, RPS23, DHX9, CYC1, OGT, SRRM1, EMG1, DCTD, DAP3, RPS20, SF3B4, AASDHPPT, TXNL4A, RPL11, ANP32B, BTN3A2, OAT, RPLP0, LSM2, PSMA5, STXBP1, ANAPC13, CAD, PRPS1, RPN1, RAD23A, SRSF3, CHD3, IMMT, SETD1A, LAMP2, TMED2, ZPR1, PCF11, PTPN11, RPL23, PSMA4, TIMM17A, PRKA…	Up-regulated
FLECHNER_PBL_KIDNEY_TRANSPLANT_OK_VS_DONOR_dn	0.147259	0.285403	0.387521	1.26302	1146	38	USP7, IMPA1, CANX, BCLAF1, HAUS2, AMFR, DNAJB6, RAB11A, SQLE, IL1B, PTPN12, PAX8, ARFGAP3, MKNK1, ATP6V1G1	Up-regulated
FLECHNER_PBL_KIDNEY_TRANSPLANT_REJECTED_VS_OK_up	0.000120802	0.00109167	0.530995	1.88515	0	61	KPNA2, GOT2, TRA2A, MPV17, CD47, PLP2, CDK7, PSMD6, PARP1, ANXA4, B2M, XRCC5, CANX, REEP5, SPCS2, TAX1BP1, DCTN6, PSMD14, RPA2, ATR, CBX1	Up-regulated
FLECHNER_PBL_KIDNEY_TRANSPLANT_REJECTED_VS_OK_dn	0.000247188	0.00182341	0.534551	1.84114	1	51	RPS2, CD46, TMEM63A, HSPA9, SLC3A2, SYNCRIP, GSPT1, POLR2H, TXNL4A, RABGGTB, RPL11, ANAPC13, SRSF3, TES, ADGRG1, SETD1A, MCM7, RPL28, GAPDH, FTH1, ITGB1, ZNF148, CTCF, RIOK3, COX7C, SAFB2, POMK, BICD2, RALBP1	Up-regulated
FLORIO_HUMAN_NEOCORTEX_up	0.0123457	0.0406068	-0.402533	-1.60033	27	37	AMY1B, UGT2B15, GLYATL1, FAM177B, MGAT4EP, PCDH11Y, TRIM22, ZNF705G, FCRL4, ZIM3, ACSM2B	Down-regulated
FLORIO_NEOCORTEX_BASAL_RADIAL_GLIA_up	0.00735294	0.0267978	-0.278557	-1.60339	0	358	AMY1B, IL1RL1, GAB3, ROR1, TTN, C7, UGT2B15, SLC17A4, ABCB5, ARHGAP28, MCOLN3, CPNE8, CRX, GLYATL1, NRP1, ABCA9, CFAP54, FAM177B, ADGRL2, PYHIN1, WWTR1, ZFP42, TMEM236, MGAT4EP, HHAT, CHRDL1, PTPRJ, EOMES, PDE7B, BVES, SLC14A1, LAX1, CPA4, ADTRP, FOXN4, CPT1A, TEX38, ADGRL4, CLNK, BNC2, TRIM58, KCNG3, PLXDC1, INSM1, CCR2, OR5H6, STAT4, LAIR1, PCDH11Y, THBS1, CRB1, DNAJC12, SCIMP, KBTBD12, BEST3, …	Down-regulated
FLORIO_NEOCORTEX_BASAL_RADIAL_GLIA_dn	0.000106338	0.00109167	0.55038	2.22853	0	182	CKS2, TPX2, ANLN, PLK1, PTTG1, DSN1, BRCA2, HJURP, POLQ, XRCC2, CDKN3, PRR11, KPNA2, CDCA5, SKA3, MKI67, E2F8, BUB1, MELK, AURKA, CDK1, RAD51AP1, PARPBP, FANCD2, TTK, UBE2C, BRCA1, CKAP2, NDE1, TOP2A, UBE2T, KIF23, CKS1B, GINS1, CENPM, SPC25, NCAPG2, PLK4, CCNB1, CCNB2, CENPF, GTSE1, PRC1, CKAP2L, ESCO2, BRIP1, KIF20A, CENPK, BIRC5, DLGAP5, TROAP, SHCBP1, KIF18A, DEPDC1, AK4, ESPL1, FBXO5, KIF11,…	Up-regulated
FLOTHO_PEDIATRIC_ALL_THERAPY_RESPONSE_up	0.000123594	0.00109167	0.648883	2.23493	0	51	STAM, RPS5, RPL7, SYPL1, RNF139, ITGA6, RPS16, RPL27, RPL5, RPS9, RPL37A, SLC38A2, RPL17, RPS20, RPL6, EEF1G, RSL24D1, RPL22, EIF3L, RPS28, CTDSPL, RPLP0, RPS6, TOMM20, OLFML2A, TMED2, RPL13A, VAMP3, TPT1, EIF4B, FXYD5, FAU, RPS19, NDRG1, RAB14, RAB1A, TBC1D15	Up-regulated
FLOTHO_PEDIATRIC_ALL_THERAPY_RESPONSE_dn	0.683012	0.805304	0.279155	0.854766	5069	28	EHMT2, ESPL1, BAIAP2, TTLL4, TRIM21, MRGBP, ASF1B, MRPL28, ANKRD40, SNN, LMNB1	Up-regulated
FONTAINE_FOLLICULAR_THYROID_ADENOMA_up	0.518182	0.681873	0.26651	0.975099	4388	74	PTK2, CDH1, E2F5, SPACA6, CABIN1, SH3RF2, TOMM40, ARHGAP21, PLXNB2, TSPAN5, ECI1, SLC29A2, GCLC, ZNF512B, RANBP10, CRLF3, FGFRL1, IL11RA, PAX8, ASGR1, RBM25, CTBP2, KRT34, FBXW8, SWI5	Up-regulated
FONTAINE_FOLLICULAR_THYROID_ADENOMA_dn	0.306257	0.478157	0.308201	1.10889	2559	66	CLDN1, KPNA2, VDAC1, C1QBP, MYC, GLRX2, CD47, CD274, MDH1, BANF1, S100A10, S100A6, FABP5, TMEM14B, ATR, BAP1, ELK4, DPP4, RGS19	Up-regulated
FONTAINE_PAPILLARY_THYROID_CARCINOMA_up	0.000837421	0.0046888	0.478069	1.72007	6	66	CLDN1, KRT18, KPNA2, CD47, CDH3, SPACA6, SNRPG, NELFA, NACC1, SPP1, SLPI, PSAT1, VTI1A, HSPB7, PLXNB2, S100A10, S100A6, TMEM45B, CTNNA1, TESC, DPP4, COX15, IL19, FUS, ETV4, RBBP4, SENP6, ARMCX3	Up-regulated
FONTAINE_PAPILLARY_THYROID_CARCINOMA_dn	0.0149051	0.0475127	-0.308335	-1.43423	21	77	ABCA8, DCLK1, FRZB, FCGBP, MATN2, PLCG2, LHB, CBL, IGSF10, CCL28, CCL11, PICK1, CDH16, MLPH, BMP5, GFPT2	Down-regulated
FONTAINE_THYROID_TUMOR_UNCERTAIN_MALIGNANCY_up	0.114818	0.236362	0.403999	1.30955	887	37	KPNA2, PTK2, SNRPG, CHRAC1, ZMYM5, UGGT1, PSAT1, CTNNA1, TESC, TMEM125	Up-regulated
FONTAINE_THYROID_TUMOR_UNCERTAIN_MALIGNANCY_dn	0.495314	0.660085	0.325923	0.981721	3646	26	CD274, SLPI, KIZ, S100A10, IFITM3, TRAF5, ATR, BAP1, IL24, ITGA4	Up-regulated
FORTSCHEGGER_PHF8_TARGETS_up	0.000207061	0.00157798	0.378693	1.57207	1	258	SCD, MLXIPL, FAM86B1, FNBP1L, DDAH1, GPR180, NDC1, CHAC1, ZP3, TBC1D4, KDM7A, ARL6IP1, PYCR1, GID8, TRMT10A, MTHFD2, RPIA, XIAP, TBC1D31, FUBP1, E2F5, HBP1, TIPIN, SYNCRIP, BET1, URI1, IQCK, FAM217B, C9orf116, DPCD, YKT6, LIN9, ZNF721, DPY19L4, ZNF280C, ZNF267, ATF4, ANKRD46, SET, ASNS, HMGB2, CDC26, FKBP1A, TMTC4, EIF5, SLC19A2, MRRF, HEY1, TMEM116, MRPL42, SLC16A1, C6orf62, SESN2, GPT2, MOK, MG…	Up-regulated
FOSTER_KDM1A_TARGETS_up	0.00303951	0.013116	-0.254343	-1.39412	0	253	TNFRSF17, CLCA1, HSPB8, LPAR1, CD200, TNNT1, SLC15A2, BCAS1, ANK2, BARX2, MDFIC, TMEM159, MGARP, MMP2, COPZ2, KCNU1, MOGAT2, HLA-DQB2, HOXD8, VWA5A, COX7A1, RCSD1, H6PD, PBLD, TEX13B, PLAC8, FHL1, PLXDC1, NRG4, HLA-DRB1, SLC6A13, NTRK2, TPBG, ECHDC2, RBMS2, C5orf47, ITSN1, SPTBN2, PRICKLE1, CDA, DEFB136, SLC5A4, USP29, MT1A, AASS, TULP4, L3MBTL3, GTSF1, BFSP2, KLF17, TMEM40, SLC4A5, ADGRF3, LRCOL…	Down-regulated
FOSTER_KDM1A_TARGETS_dn	0.0226359	0.0667477	0.331035	1.34526	213	191	TFDP1, RAC3, NDUFB11, AGFG1, DDX27, GFM2, MTHFD2, ACAD10, URAHP, KDM1A, SPRYD4, IFT172, CWC22, SUB1, CIZ1, SCLY, YKT6, DLGAP5, VRK1, NT5C3B, RPP25L, PIK3R2, WIPI2, TMEM186, UBE2E1, BAIAP2, POLDIP2, FAM110A, RUVBL2, RARS2, CDC20, ITGB4, TIA1, RDM1, KRBA1, ANKRD13A, LRCH4, RBKS, ARG2, MRPL10, POU2F1, SCYL1, SOX15, SFSWAP, CELSR3, TMEM141, SAP30, IL11RA, BLCAP, ANKRA2, DHODH, RASSF1, TAF5, POLA2, WD…	Up-regulated
FOSTER_TOLERANT_MACROPHAGE_up	0.9322	0.961952	0.185896	0.744852	8661	160	MET, IFRD1, SYK, MTHFD2, KPNA4, AOAH, ASS1, SLC31A1, CYCS, PRDX5, TSPO, CXCL9, HILPDA, SMURF1, GALNT15, CCDC71L, TMEM178A, RAB10, BTG3, RNF149, TNFRSF1B, LCN2, PGAP2, ITGAL, BAK1, SLX4IP, FBRSL1, ARHGAP8, MCHR1, AGTRAP, ATXN7L1, GPR61, IRF7, RTN4R, CLN5, ANKRD66, SPIC, TXNRD1, RGS1, RIOK3, PRKRIP1, CD38, STAT1, ZDHHC18, PITX1	Up-regulated
FOSTER_TOLERANT_MACROPHAGE_dn	0.940178	0.965991	0.186035	0.790451	9303	390	NUP58, RBL1, B4GALT5, RAC3, PPA1, SDC4, F11R, PDSS1, TRA2A, SLC25A22, GNG4, FAM32A, PDZK1IP1, FNBP4, WDR43, SFPQ, USP12, MITD1, TMEM243, RIPK2, TMA16, PHIP, GSPT1, ZNF800, ST6GALNAC4, SETDB2, CENPJ, LANCL2, FMR1, BFAR, EZR, SNX10, ODC1, NFXL1, S100A10, GPSM2, SLC16A1, USP42, KPNA3, AEBP2, GK, CMTM6, AREL1, CXCL11, HSPA1B, NOC4L, DCP1A, MTMR7, TMCO3, MINPP1, ARMC8, SRSF3, FZD5, PRPF38A, RCN1, HOME…	Up-regulated
FOURNIER_ACINAR_DEVELOPMENT_EARLY_up	0.00560617	0.0216069	-0.56102	-1.86108	15	19	GSN, EFEMP1, FOSL2, EGR1, SUCLG2	Down-regulated
FOURNIER_ACINAR_DEVELOPMENT_LATE_dn	0.000138427	0.00109516	0.678331	1.9576	0	21	CKS2, CDKN3, AURKA, TRIP13, CEP55, NCAPG, VRK1, ZWILCH, ODC1, EPHA2, EIF4A1, ASPM, ACTB	Up-regulated
FOURNIER_ACINAR_DEVELOPMENT_LATE_2_up	0.000103103	0.00109167	0.611773	2.54777	0	270	CKS2, PLK1, CSE1L, PTTG1, EXOSC8, SCD, HJURP, POLQ, CDKN3, FERMT1, CYP51A1, NDC1, CDC6, SKP2, MELK, PTGES3, AURKA, CDK1, PSMB2, NOLC1, USP1, MCUR1, TTK, TRIP13, RPA3, MTHFD1, NIF3L1, CCT2, GINS2, LYPLA1, DUT, CKS1B, GINS1, CDK2, EIF5B, PRDX3, EEF1E1, CENPN, POLA1, MAK16, DBF4, NCAPG2, TMPO, AGFG1, DHFR, TXN, PRC1, CCNF, ALG8, PDIA6, PREB, STK39, SSB, TIPIN, HACD3, BIRC5, SEC23B, PRDX1, DCAF15, CK…	Up-regulated
FRASOR_RESPONSE_TO_ESTRADIOL_up	0.258541	0.426286	-0.293434	-1.12979	612	33	CXCL12, CA12, PEG10, MPPED2, FOS, EPB41L3, ADCY9, IGFBP4, GLRB	Down-regulated
FRASOR_RESPONSE_TO_ESTRADIOL_dn	0.83412	0.906601	0.215085	0.786949	7064	74	ERBB3, ALDH4A1, INSIG2, ANXA3, ENC1, TM4SF1, STC1, CTSH, LHFPL2, STXBP1, PRPS1, GPRC5A, SLC16A5, BAK1, NDRG1, CD24, ADORA2BP1, GNS, TTC9, KLF6, KRT7, COL4A5, DUSP4, DDIT4	Up-regulated
FRASOR_RESPONSE_TO_SERM_OR_FULVESTRANT_up	0.916696	0.954072	-0.201224	-0.677854	2607	20	DLX2, PLXNC1, RAB30, AKAP3, DMXL1	Down-regulated
FRASOR_RESPONSE_TO_SERM_OR_FULVESTRANT_dn	0.000125109	0.00109167	0.677264	2.29299	0	47	CDK8, AURKA, CDK1, CCNA2, UBE2C, MTHFD1, RFC2, MYC, CKS1B, CDC25B, CENPF, STMN1, E2F1, MYB, PRIM1, KIF11, WEE1, FKBP1A, MCM3, KIF2C, POLRMT, TTLL4, CDC20, RRM1, MCM7, BARD1	Up-regulated
FRASOR_TAMOXIFEN_RESPONSE_up	0.387666	0.562258	0.308086	1.05337	3117	49	YWHAZ, SHANK2, GGA2, B3GNT2, OAZ3, FARP1, PRPS1, MSH2, ADGRG1, CDK19, KBTBD2, CLIC3, SOCS1	Up-regulated
FRIDMAN_IMMORTALIZATION_dn	0.906328	0.950223	0.218532	0.684178	6859	31	CDKN2A, HPS5, RB1, IGFBP3, IRF7, IGFBP7, CREG1, TGFB1I1, MAP1LC3B	Up-regulated
FRIDMAN_SENESCENCE_up	0.880047	0.936108	0.205604	0.752257	7453	74	EIF2S2, CDKN2A, HBS1L, RAC1, S100A11, HPS5, CCND1, SOD1, TES, ISG15, MMP1, IGFBP3, ESM1, IRF7, PEA15, IGFBP7, SMURF2, CREG1, TGFB1I1, STAT1, MAP1LC3B, FN1	Up-regulated
FUJII_YBX1_TARGETS_up	0.010223	0.0347282	-0.405222	-1.63181	21	40	CDC42SE2, PDK4, ACTA2, MAOB, TINCR, FAS, ASCL1, CCL5, PRICKLE1, TRIM22, GIMAP2, SMIM5, CPNE4, NR5A2	Down-regulated
FUJII_YBX1_TARGETS_dn	0.000106213	0.00109167	0.577717	2.34258	0	187	CDCA7, RAD54B, CDK8, CDKN3, ATAD2, CDC6, SKP2, MELK, PARPBP, FANCD2, TRIP13, CCT5, BRCA1, TOP2A, GINS2, KIF23, DUT, CKS1B, RFC4, CDK2, NOP56, CENPN, PTK2, MCM10, SLC25A19, SPC25, NCAPG2, PLK4, DHFR, CHEK1, CCNF, NEIL3, BRIP1, CRIPT, SSRP1, POLE2, CENPK, TIPIN, CDC25C, SLC25A32, PRKDC, PRIM1, NUP62, TCF19, SHCBP1, VRK1, DTYMK, KBTBD6, DEPDC1, MAD2L2, RFC3, FBXO5, DNAJC3, KIF11, MYBL2, RDH10, VAPB,…	Up-regulated
FUKUSHIMA_TNFSF11_TARGETS_up	0.66942	0.794775	0.316727	0.85489	4699	16	ACP1, HEY1, NOTCH3	Up-regulated
FULCHER_INFLAMMATORY_RESPONSE_LECTIN_VS_LPS_up	0.000200642	0.00154441	0.34035	1.46154	1	551	CERS6, TOMM34, RRS1, LIMK1, LTV1, PTDSS1, RAB11FIP1, LYRM1, GOT2, BZW2, NDFIP2, GGH, POLR1D, SLC7A1, MRPL52, MET, DCTPP1, C12orf45, TMEM14C, TBC1D4, CYB5B, EEF1E1, POLR2F, NMD3, MARCKSL1, GTF3A, RPL10A, GAS5, MTHFD2, MMP12, SGTA, MRTO4, RPS19BP1, GRPEL1, NDUFA2, MCCC2, ACSL5, SLC3A2, HAX1, ARPC5L, DCLRE1B, ARHGAP22, TMX2, NFKBIE, SUB1, MEI1, MRPL51, RANBP1, ZNF697, CKLF, IRF2BP2, FBXL4, SMIM19, N…	Up-regulated
FULCHER_INFLAMMATORY_RESPONSE_LECTIN_VS_LPS_dn	0.967329	0.98205	0.180111	0.767298	9592	428	PRR11, CYP51A1, UBXN2A, SCCPDH, STK26, KLF5, B4GALT5, PPA1, APOC1, PDIA4, XRN2, EPSTI1, MRPL30, SORT1, PATL1, PDIA6, MTIF3, GGA2, LGALS8, CCNL1, SPTLC2, TMEM241, B3GNT2, NUP62, HNRNPA2B1, PRKAR2A, ZNF207, SETDB2, ACBD5, FMR1, ARHGAP12, LDLRAD3, KCNQ1, IFITM1, NPIPB3, UBE2L6, UNC93B1, RB1, CCDC82, SPINK1, IDO1, CXCL9, HAUS2, FCGR3B, NT5C3A, IFITM3, CXCL11, CD2AP, SEPHS2, HSPA1B, STXBP3, OTOA, TOR1…	Up-regulated
FURUKAWA_DUSP6_TARGETS_PCI35_up	0.360843	0.536783	0.296146	1.07109	3029	68	BPHL, MDK, ALDH1B1, SLC15A3, SAA1, IFITM1, TMCO4, PSMB9, HERC5, IL32, PSG11, OLFML2A, APH1B, ZBTB20, CD24, RTP4, FOLR1, FXYD3, PARP9, AKR1C3, SLC2A10, TNFSF13B, SOX4, DUSP4, BTN1A1, KLRC2, FRMD5, CLDN16	Up-regulated
FURUKAWA_DUSP6_TARGETS_PCI35_dn	0.000118301	0.00109167	0.607995	2.2133	0	71	TPX2, HJURP, STIL, AURKA, CCNA2, CEP55, CKAP2, PDSS1, RFC4, KIF20B, CCNB1, CCNB2, CENPF, PRC1, WDR5, NCAPG, EBNA1BP2, PRIM1, GOLT1A, DLGAP5, SHCBP1, WDR3, KIF11, CRNDE, RIOK1, KIF2C, CCNE2, ARHGAP11A, RRM1, KNSTRN, PRMT5, EPHA2, LAT2, NCAPD2, PHLDA2, NUSAP1	Up-regulated
GABRIELY_MIR21_TARGETS_up	0.014827	0.0472964	0.317797	1.32498	143	278	CCT6P1, CERS6, PM20D2, DDAH1, SKP2, KLF5, TOP2A, SLC5A3, USP7, PIK3R1, PHIP, ADNP, FAM217B, DDHD2, PARP1, CCDC14, KBTBD6, ZBTB38, SLC31A1, NFAT5, UGGT1, ACBD5, PRRC1, VPS36, CUL3, PTBP3, ARHGAP21, ARFGEF1, AGO4, ST6GAL1, PAN3, THOC2, SLC9A6, ZNF587, AP3M1, MYCBP2, SRSF11, PURB, ZNF326, SLC17A5, KBTBD7, PHACTR2, JPH1, MEGF9, SACM1L, LMBR1, YME1L1, RTF1, SUZ12, ZNF286A, RAB22A, MSH2, TBL1XR1, UBXN4…	Up-regulated
GAJATE_RESPONSE_TO_TRABECTEDIN_up	0.279386	0.450127	-0.244708	-1.08618	472	62	GSN, CSRP2, CPE, NID2, GOLGA8A, IL6, FOS, CLU, C1R, CLIC4, C4BPA, UGCG	Down-regulated
GAJATE_RESPONSE_TO_TRABECTEDIN_dn	0.432559	0.601896	0.381055	1.02852	3036	16	DDX10, UTP20, TRIM16, PKP4, ARHGDIA, FARS2	Up-regulated
GAL_LEUKEMIC_STEM_CELL_up	0.414042	0.588402	0.264858	1.03386	3732	125	HJURP, CACYBP, BCL11A, BPHL, LGALSL, HADHAP1, METTL2B, GEMIN6, EXO5, ZMYM5, FBXO9, CCND1, TSPAN5, ANXA9, CLDN18, MMP11, MPHOSPH9, ITGB4, GPATCH1, ZNF639, IRF6, MFSD6, UBR4, KBTBD4, DCAKD, AGFG2, N4BP1, TRIM33, SENP6, DCAF4, PEX5, EVPL	Up-regulated
GAL_LEUKEMIC_STEM_CELL_dn	0.0022931	0.0104403	0.351689	1.44943	21	225	PLK1, CDKN3, E2F8, CDC6, BUB1, MELK, CDK1, CCNA2, TOP2A, GINS2, CENPM, MOGS, MOSPD3, SAC3D1, CCNB1, CCNB2, MMP9, DHFR, GTSE1, KIF20A, OSGIN2, S100P, E2F1, CDC25C, BIRC5, NCAPG, ALDH4A1, PALB2, CST4, SHCBP1, C12orf29, AOAH, ENC1, MAPK13, SLC15A3, ESPL1, CDCA8, LYPLA2, FGGY, ZFY, TPI1, ITGA2B, FEN1, TRAC, ZNF518A, CDC20, CASP1, MINPP1, SLC6A6, SMC2, G0S2, ONECUT2, AZU1, NCF2, IL1B, PLAA, CDC45, NUS…	Up-regulated
GALE_APL_WITH_FLT3_MUTATED_up	0.000121684	0.00109167	0.548759	1.92512	0	57	BOLA2, NOLC1, TTK, CDC16, SLC25A13, LYPLA1, TRMT11, PSMF1, STX16, HEATR1, RFC3, ABCC1, DHX15, HNRNPH1, C6orf62, SRSF11, CSNK1A1, ZNF529, ATR, TELO2, UPF3A, AVL9, PHF11, NSUN5	Up-regulated
GALE_APL_WITH_FLT3_MUTATED_dn	0.0319043	0.0880428	0.572808	1.54609	223	16	BAD, PQBP1, ARF1, GPR137, P4HB, HLA-G, DRAP1, OASL, HLA-J, DEGS1	Up-regulated
GALINDO_IMMUNE_RESPONSE_TO_ENTEROTOXIN_up	0.879104	0.936108	0.20534	0.757259	7496	78	SCD, MARCKSL1, SPP1, CXCL3, ODC1, ETS2, BCL10, UBB, CSF3, UBC, IL1B, PLAUR, CEBPB, GAPDH, SQSTM1, LILRB4, PHLDA1, FOSL1, NOCT, TSC22D1, RAC2	Up-regulated
GALLUZZI_PERMEABILIZE_MITOCHONDRIA_up	0.199363	0.355272	0.365944	1.20521	1564	40	VDAC1, SIVA1, MTCH2, VDAC2, PPID, BAD, DNM1L, CASP2, BAK1, CASP3, SERPINB5, MAPK8, SH3GLB1, BAX, PMAIP1, GZMB, CFL2, PLS3, PRKCD, BNIP3	Up-regulated
GARCIA_TARGETS_OF_FLI1_AND_DAX1_up	0.426582	0.598103	0.300626	1.02787	3430	49	PTGES3, NEIL1, FAM234A, IFT140, STAT2, UBE2L6, ATP7B, MYO6, HMGCL, MAGED4B, RASA4, ANKRA2, SGSM2, ZNF217, KDELR3, KLHDC8B, ZFP90, WDR19, SNX14, PGAP1, LMBR1L, NKX3-2	Up-regulated
GARCIA_TARGETS_OF_FLI1_AND_DAX1_dn	0.000107898	0.00109167	0.581284	2.32412	0	156	CDCA5, CDC6, SKP2, CHAF1B, PSMA7, NOLC1, MRPL11, CHCHD3, TRMT6, GINS2, CCNC, DUT, CENPM, CYB5B, RSL1D1, CDK2, NOP56, BRD7, MCM10, TRMT10A, TMPO, DDX27, DHFR, CHEK1, RPIA, RRP15, SFR1, ESCO2, STRBP, MRPL48, SNRPC, PRELID1, TIPIN, WDR5, MAPRE1, NPM1, KCNE3, SCLY, HPDL, TGIF2, TCF19, SRRM1, RPS8, CNOT7, MYBL2, RPP30, DENR, WDR76, ZNF93, ZWILCH, RRP9, RPS10, FANCE, TOE1, TPRKB, FEN1, HAUS2, TIMM10, K…	Up-regulated
GARGALOVIC_RESPONSE_TO_OXIDIZED_PHOSPHOLIPIDS_BLACK_up	0.038607	0.103439	0.462197	1.4738	295	34	RHPN2, SPRY4, OSGIN2, RGMB, ETV5, CCDC82, SQLE, TRIB3, UBBP1, CLK1, SNX16, EIF1, CCDC93, SRC, DUSP14, CD55, CDC42EP2, F2RL2	Up-regulated
GARGALOVIC_RESPONSE_TO_OXIDIZED_PHOSPHOLIPIDS_BLUE_up	0.000768555	0.00436748	0.409888	1.61214	6	132	HSPH1, STIP1, CHORDC1, KLF5, RSL1D1, KDM7A, IFRD1, DNAJB1, AHSA1, ZFAND2A, SLC3A2, RGMB, MTHFD2L, DNAJA1, NUTM2B-AS1, CXCL3, HSPA1A, RHEBL1, CBLL1, PNP, EIF5, SLC19A2, KCTD5, SESN2, CXCL8, HSPA1B, SMURF1, OSER1, CREM, DNAJB6, DNAJB9, PCF11, ZNF468, N4BP2L2, INHBA, PLAUR, SAV1, CASP3, ZNF473, ESM1, RBBP6, DEDD2, MAFG, FOSL1, PCYT1A, RBM33, YRDC, KIF1B, MAP1LC3B, PMAIP1, VPS37A, HSPA4L, RORA, ATF3,…	Up-regulated
GARGALOVIC_RESPONSE_TO_OXIDIZED_PHOSPHOLIPIDS_BLUE_dn	0.321914	0.493816	-0.239803	-1.06441	544	62	PALMD, CMTM3, TMEM50B, VWA5A, NREP, FUT8-AS1, HOXB3, CH25H, ZNF462, CASP8, RUNX1T1, FBXL15, SIX5	Down-regulated
GARGALOVIC_RESPONSE_TO_OXIDIZED_PHOSPHOLIPIDS_BROWN_up	0.0690987	0.162691	0.54178	1.43933	482	15	CYP51A1, INSIG1, MSMO1, SQLE, NQO1, PTGR1, SQSTM1	Up-regulated
GARGALOVIC_RESPONSE_TO_OXIDIZED_PHOSPHOLIPIDS_CYAN_up	0.79191	0.880587	0.282545	0.76263	5559	16	SLC7A1, ADAM17, PTP4A1, CSGALNACT2, CCDC117, GSR, SETD5, ARF6, GNA13	Up-regulated
GARGALOVIC_RESPONSE_TO_OXIDIZED_PHOSPHOLIPIDS_GREEN_up	0.592014	0.739088	0.304429	0.916977	4358	26	STIP1, IDI1, ETV5, TNFRSF10A, CREM	Up-regulated
GARGALOVIC_RESPONSE_TO_OXIDIZED_PHOSPHOLIPIDS_GREEN_dn	0.705648	0.822859	0.284955	0.836645	5146	23	B4GALT5, EHMT2, PRDM15, MXD3, NSD1, ANKRD11, PATZ1	Up-regulated
GARGALOVIC_RESPONSE_TO_OXIDIZED_PHOSPHOLIPIDS_GREY_up	0.27326	0.443413	-0.349268	-1.14148	792	18	ADAMTS1, ARRDC4, ZSCAN31, LBH, NAV3, SOS1, WHAMMP3	Down-regulated
GARGALOVIC_RESPONSE_TO_OXIDIZED_PHOSPHOLIPIDS_GREY_dn	0.0594699	0.145162	-0.283689	-1.30727	91	73	METTL7A, SMAD7, MGARP, RASSF10, GJA5, RPRD1A, IFIT1, PHLDB2, FOXP1, TBX18, GRAP, GXYLT2, RUNX1T1, ACKR3, SHISA3, PDGFB	Down-regulated
GARGALOVIC_RESPONSE_TO_OXIDIZED_PHOSPHOLIPIDS_MAGENTA_up	0.785036	0.876034	-0.218238	-0.80214	2066	27	CSRNP1, FOSL2, ZSWIM6, FBXO30, MAFF, GABARAPL1	Down-regulated
GARGALOVIC_RESPONSE_TO_OXIDIZED_PHOSPHOLIPIDS_PINK_dn	0.10522	0.221983	-0.344879	-1.30495	255	31	PALMD, GIMAP8, ARHGAP28, ZEB2, GIMAP7, MEF2C, GIMAP2, TNFSF10, FILIP1	Down-regulated
GARGALOVIC_RESPONSE_TO_OXIDIZED_PHOSPHOLIPIDS_RED_up	0.00242131	0.0109054	0.669419	1.80686	16	16	SLC7A5, CHAC1, DDX10, MTHFD2, ATF4, TUBE1, NCEH1, LRP8, E2F7, CEBPB, STC2, CEBPG, DDIT4	Up-regulated
GARGALOVIC_RESPONSE_TO_OXIDIZED_PHOSPHOLIPIDS_RED_dn	0.978709	0.989022	0.189476	0.561404	7170	24	RALA, SPTLC2, RAB11A, MLYCD, SESN1, HLX, EEF2K, CEP68, TRIM34	Up-regulated
GARGALOVIC_RESPONSE_TO_OXIDIZED_PHOSPHOLIPIDS_TURQUOISE_up	0.795531	0.883463	-0.184558	-0.86497	1174	79	SGK1, ZFP36, CLIC2, FOSL2, EGR1, ZNF627, ANKRD12, ZCCHC2, CLIP2, MYCT1, EMP1, FBXO30, GABARAPL1, PIM3, MAP1B	Down-regulated
GARGALOVIC_RESPONSE_TO_OXIDIZED_PHOSPHOLIPIDS_TURQUOISE_dn	0.00012364	0.00109167	0.642184	2.21605	0	52	PLK1, RRS1, MKI67, E2F8, SKP2, AURKA, CCNA2, EXOSC2, NIF3L1, TMPO, DDX28, CCNF, NEIL3, GEMIN6, ESPL1, ZNF93, TACC3, TTLL12, CDC20, KIF15, BARD1, ZNF174	Up-regulated
GARGALOVIC_RESPONSE_TO_OXIDIZED_PHOSPHOLIPIDS_YELLOW_up	0.00722795	0.026384	0.542131	1.67126	53	29	SLC7A1, KDM7A, XPO1, PPP3R1, NPC1, NUP153, TULP3, GK, GCLC, OSGIN1	Up-regulated
GARGALOVIC_RESPONSE_TO_OXIDIZED_PHOSPHOLIPIDS_YELLOW_dn	0.261365	0.429597	0.400368	1.16663	1902	22	B4GALT5, KNOP1, ZMYND8, PIK3R2, HILPDA, OXLD1, PCTP	Up-regulated
GARY_CD5_TARGETS_up	0.000705574	0.0040656	0.332715	1.4193	6	442	SCD, CMTM8, CYP51A1, SLC7A1, ALKBH7, GART, RALA, SC5D, INSIG1, IFRD1, TUBGCP3, ERLIN2, ESD, ACLY, GAS5, TYSND1, PPP1R14B, RSRC1, DHCR7, LETMD1, DHTKD1, SLC3A2, MKRN1, SERINC3, MSMO1, DESI2, IRF2BP2, FAHD2A, STX16, RBM39, PIGP, NUP210, ZNF207, ST6GALNAC4, ATF4, TM2D1, SET, KPNA1, ASNS, WAC, NFAT5, PSAT1, SLC38A2, GATAD1, P4HA1, CAMLG, HMGA1, UBXN6, NAGLU, WWOX, SLC35A3, TMEM120A, HMGCR, TKT, NPIPB…	Up-regulated
GARY_CD5_TARGETS_dn	0.000100939	0.00109167	0.570569	2.42912	0	422	HSPH1, CCT6A, TFAM, SEC23IP, SERBP1, STIP1, KPNA2, UFM1, SAP18, UMPS, PDP2, SKP2, PSMA7, NOLC1, CHORDC1, DLEU2, RSC1A1, TFRC, CUL2, MET, DCTPP1, RFC2, KIF23, BCCIP, GINS1, CYB5B, GPATCH4, BCL11A, NOP56, MRPS17, CEBPZ, MRPL20, ZNF451, AMD1, SLC25A19, TRMT10A, XPO4, CCNB1, DDX27, CUL4A, TMEM33, METAP2, MAGT1, GAS5, CENPF, POLR3G, MRPL30, RRP15, SRSF2, GNL2, PDCD5, CBWD1, RLIM, FUBP1, SLC11A2, USP6N…	Up-regulated
GAURNIER_PSMD4_TARGETS_up	0.73144	0.840234	-0.193737	-0.887996	1132	71	IL17RA, IL18R1, IL6, HLA-DQB2, CCL1, HLA-DRB1, NFKB1, TGFB1, CCL5, CCL13, IL1R2, CCR3, C3, HLA-DPB2, HLA-DQB1, IL12RB1, CCL3, CCL19, CCR7, C5AR1, IL1A, HLA-DPB1, IL10	Down-regulated
GAUSSMANN_MLL_AF4_FUSION_TARGETS_A_up	0.917932	0.954072	0.188667	0.764925	8645	185	GOT2, SORD, HDAC2, SLBP, STRBP, RMDN1, RPL15, EID2, RIF1, WAC, HOXA10, CCT3, LIG3, THOC1, SYAP1, P3H2, PRELID2, GK, ZNF518A, ZDHHC20, ARHGAP32, DYNLT3, ZNF286A, RNF130, ZNF467, ATP6V1B2, PLGRKT, LYSMD2, ZMYM2, AP1S3, ERICH3, CRYL1, DISP1, GAS2L3, RP2, RTP4, USP14, SMOC2, PFKFB2, IGFBP7, RPGR, GLB1L, TRIM2, GDA, ZNF22, CENPE, TTC9, CPSF6, ST3GAL6, BRD8, GATA6, EMC9, LYN, FLT1, OLIG2, JMJD1C, TCAF1…	Up-regulated
GAUSSMANN_MLL_AF4_FUSION_TARGETS_A_dn	0.175955	0.324618	-0.237204	-1.138	220	92	SLIT3, EFNA5, ITIH5, ESR1, C1QTNF3, LRRN4CL, ITGB5, PARM1, PDE4B, GIMAP7, ENPP2, TGFB2, LMF1, AHRR, COLEC10, LCP1, ANKS3, GTSF1, CYP2C18, FBXO2, CAMK4, AGMO, SLC4A10, SOD3, LOXL4, LAMA5, C3orf38, ZNF746	Down-regulated
GAUSSMANN_MLL_AF4_FUSION_TARGETS_B_up	0.741077	0.8475	0.267723	0.812627	5460	27	PARP12, ENPP1, NUS1, USP9X, HEATR6, COL11A1, CIB2	Up-regulated
GAUSSMANN_MLL_AF4_FUSION_TARGETS_C_up	0.220405	0.38183	0.284213	1.13879	2047	160	DDAH1, MFSD8, YWHAZ, SLC11A2, MRPS15, PRKAG1, PHIP, NFKBIE, RPS15A, COX11, RMND1, HSPA1A, ZBTB38, DNAJC3, RPS20, IFITM1, BUB3, SRSF11, CCDC125, IFITM3, YIPF4, SACM1L, CSNK1A1, TCF7, UNC13B, YIPF2, PDCD6IP, ZNF182, HYPK, TOMM20, RPRD2, CA9, CCAR1, RBM10, IER5L, LRCH1, SH3BGRL2, PRPF38B, BTF3L4, USP3, PSMD7, SNX13, RASSF3	Up-regulated
GAUSSMANN_MLL_AF4_FUSION_TARGETS_C_dn	0.569767	0.720562	0.321403	0.927541	4115	21	CHAC1, ARHGAP22, RNF187, ASNS, BCS1L, MLF1, ERO1A, UCHL1, PLCL1, AHI1, ERMP1	Up-regulated
GAUSSMANN_MLL_AF4_FUSION_TARGETS_D_up	0.927351	0.959451	0.208228	0.663971	7109	34	PERP, GPR153, CA13, CYP2B6, XPO7, MED13	Up-regulated
GAUSSMANN_MLL_AF4_FUSION_TARGETS_E_up	0.000824402	0.00463336	-0.415818	-2.01081	0	96	SFRP1, RCAN2, SVEP1, METTL7A, SFRP2, MEDAG, ADGRG2, PDGFRA, ID4, PTN, HAS2, KCNF1, COLEC12, SERPINA3, BVES, NREP, CP, SEMA3B, FOS, CLU, CYP7B1, SORCS2, CCL5, MTUS2, PLB1, RNF144B, KDM6A, GNRHR, KCTD12, YIPF5, NPNT, PDGFRL, ISLR, FLRT3, L1CAM	Down-regulated
GAUSSMANN_MLL_AF4_FUSION_TARGETS_E_dn	0.879698	0.936108	0.244932	0.698858	6295	20	MORC4, GPT2, VLDLR, TRIB3	Up-regulated
GAUSSMANN_MLL_AF4_FUSION_TARGETS_F_up	0.00159744	0.00773475	-0.31065	-1.65649	0	178	OGN, TTLL7, OR51B2, MATN2, ADAMTSL4, ARHGAP28, PLCG2, TGFB3, OSMR, ADGRL3, PLCE1, NCKAP5, RGS4, TOX, MFAP2, FCGRT, ACTG2, SPPL2A, OLFML3, MFAP5, MEG3, ATP8B4, GAS1, PNRC1, TLE2, FST, NR4A3, ECHDC2, COL6A2, LOX, FEZ1, SYNPO, ADAMTS4, PRICKLE1, CDA, ARHGEF3, TCP11L2, ECM1, CLIP4, TP53INP1, CEBPD, TEK, PDGFB, ZFP36L1, COL6A1, DKK3, OSR1, CNN1, MAPK12, SLC1A3, IL4R, CLMN, EMILIN2	Down-regulated
GAUSSMANN_MLL_AF4_FUSION_TARGETS_F_dn	0.992958	0.996236	-0.143728	-0.566515	2255	36	CD53, AKR1B10, VEGFC, FGFBP1, GSTA1, SYCP3, TWIST2, NAP1L2, GADD45A, ALDH1L2, PRL, CLEC5A	Down-regulated
GAUSSMANN_MLL_AF4_FUSION_TARGETS_G_up	0.0426667	0.111715	-0.219262	-1.18756	15	238	SLC26A2, ADH1B, DAAM2, DOCK10, GDPD2, NEGR1, RAPGEF3, TNIP2, LYVE1, P2RX5, EPHA7, SCUBE2, GAP43, ACTA2, PEG10, ANG, EGR2, CLMP, SPARCL1, IGF1, CTAG2, CD48, MPPED2, PRKG1, ROR2, UGT2B4, DEFB110, LRRC71, CRMP1, TMCO2, SYTL2, THBS1, FBXO32, ITIH2, EGFL7, DUSP22, REP15, DHH, MUSTN1, RAMP3, TET1, MS4A6A, PCDHB5, CRTAM, NFIB, NTF4	Down-regulated
GAUSSMANN_MLL_AF4_FUSION_TARGETS_G_dn	0.836194	0.908212	0.235388	0.746173	6380	33	DUS4L, TMEM243, RNF128, CPOX, ING5	Up-regulated
GAVIN_FOXP3_TARGETS_CLUSTER_P2_up	0.330623	0.50326	-0.225908	-1.05081	487	77	CPE, ST6GALNAC1, DAW1, BICC1, RAB6B, CPM, CHST15, C3orf70, PADI2, PRR5L, ABCB1, CCL5, PRICKLE1, GJA1	Down-regulated
GAVIN_FOXP3_TARGETS_CLUSTER_P3_up	0.228898	0.391626	-0.206702	-1.083	159	161	F13A1, SLC15A2, FCMR, MATN2, CD200R1, DZIP1, IL18R1, POU2F2, PTPRJ, ST8SIA1, ID2, ACTG2, ITGB5, CBX7, CC2D2A, PLXDC1, SYTL2, EVI2A, SFI1, SLC35D1, CYBB, SDR39U1, ITSN1, SORCS2, AKAP7, PTPRVP, CASS4, IGFBP4, GABARAPL1, ABCA2, KCTD12, CTSL	Down-regulated
GAVIN_FOXP3_TARGETS_CLUSTER_P4_up	0.00569569	0.0218842	-0.318104	-1.53474	6	95	ADH1B, IL1RL1, NCF1, NEB, CAPN3, GPR15, NRP1, EPAS1, IKZF2, ITIH5, CNGA1, GGT5, TIAM1, ATP8B4, APOL3, RAPGEF4, SWAP70, CD83, RAMP3, TTC7B, GPLD1, IL1R2, STX11, SYT11, IL2RB	Down-regulated
GAVIN_FOXP3_TARGETS_CLUSTER_P6_up	0.00011489	0.00109167	0.587077	2.20549	0	89	TPX2, PLK1, CDCA5, BUB1, AURKA, CDK1, CCNA2, CEP55, SLC39A4, GINS2, CKS1B, MCM10, RAD54L, SPC25, NCAPG2, CCNB1, CCNB2, CENPF, GEMIN8, KIF20A, CENPK, BIRC5, NCAPG, CLSPN, IL17RB, NEDD4, MYO1F, KSR1, DCTD, ODC1, CDCA8, KIF2C, STARD10, TPI1, CDC20, TMEM38B, MTMR7, UNC119	Up-regulated
GAVIN_FOXP3_TARGETS_CLUSTER_P7_up	0.3151	0.487531	-0.221824	-1.0593	408	89	NTRK3, ITIH5, DRC1, DST, FOS, EVI2A, PRG4, ABCB1, ECM1, GLIPR2, SOCS2, EMP1, PARD6G, AGPAT4, HIPK2, GSTA1, CYFIP1, TLR7, KLRD1, SOSTDC1, MBNL3, SELP, SHE, PPIC, HS3ST3B1, GATA1, DENND5A, APP, PPP1R3E, APOBR, TMEM158, IL10, HECTD2, MTMR3	Down-regulated
GAVIN_FOXP3_TARGETS_CLUSTER_T4_up	0.640818	0.771809	0.243242	0.909353	5544	86	MYC, SC5D, ITGA6, FOXP3, PSMB3, SYNGR2, AHCY, ODC1, RRAGD, RPN2, DRG1, TIMM10, ITGAE, GLUD1, ARF1, HINT1, YWHAQ, P2RX7, CTLA4, MAF1, TNFRSF9, ITGB1, SMU1, LRIG1, CD38, TTC39B, CAPG, RORA	Up-regulated
GAVIN_FOXP3_TARGETS_CLUSTER_T7_up	0.000567151	0.00342598	0.456974	1.73997	4	98	ALG5, MTHFD1, CCT2, AMD1, XPO4, GMPS, CD47, RPL18, EIF3H, FIS1, MKRN1, RPS7, EIF3M, GDI2, UCK2, SNRPB, OAZ1, RPS9, PNP, MDH1, CHCHD2, NDUFA9, REEP5, EIF3L, ENO1, LRPAP1, TPR, PDRG1, PRPS1, NRGN, RPL10, RPL32, HNRNPF, SAR1A, CD24, PPDPF, EIF3B, MTF2, RUVBL1, STAMBPL1, RBM33, MCM6, SUPT4H1, STAT1, RTCB, RAC2, MRPL46	Up-regulated
GAVIN_IL2_RESPONSIVE_FOXP3_TARGETS_up	0.166902	0.312043	0.464564	1.27604	1181	17	SORD, SYPL1, FOXP3, RRAGD, MCM7	Up-regulated
GAVIN_PDE3B_TARGETS_up	0.0665197	0.157993	-0.417059	-1.43844	180	22	F13A1, NCF1, SYTL2, CYBB, TGFB1, SYT11, TNFSF10, LAMC1	Down-regulated
GAZDA_DIAMOND_BLACKFAN_ANEMIA_ERYTHROID_up	0.0619313	0.149408	0.474558	1.42943	455	26	NUFIP1, PDK3, HNRNPR, SPHK2, UTP6, NUP62CL, DDB2, SEPHS2, ATP6V1B2, DPY19L1, SESN1, PRKX, TNFRSF10B, LEPR, LIMK2	Up-regulated
GAZDA_DIAMOND_BLACKFAN_ANEMIA_ERYTHROID_dn	0.000705716	0.0040656	0.334261	1.42484	6	432	PLK1, BRCA2, XRCC2, DNAJC16, UGGT2, TMEM254, UBFD1, POM121, SLC39A4, LAMTOR2, NDE1, C12orf45, HSPA9, TMCO6, POLR2F, ZNF451, INSIG1, HSPD1, KRIT1, BPHL, MAGT1, CELSR2, RSRC1, OSGIN2, LGALS8, MYB, IQCK, EIF3M, PAQR4, ANXA3, METTL2B, CIR1, SIVA1, PPIAP21, FBXL4, EPHB4, TMEM120B, SGF29, AOAH, DIS3, KIZ, NMU, RMND1, GPR153, PGM3, MTHFS, RPL23AP4, HEATR3, WEE1, HNRNPM, FBXO9, UTP20, ZNF93, CANX, SLC35A…	Up-regulated
GAZDA_DIAMOND_BLACKFAN_ANEMIA_MYELOID_up	0.192414	0.346511	-0.322197	-1.20268	486	29	CA2, FRY, FOSL2, ENPP4, IPCEF1, PLPP1, NR4A3, PDE4A	Down-regulated
GAZDA_DIAMOND_BLACKFAN_ANEMIA_MYELOID_dn	0.0349288	0.094966	0.458919	1.48161	269	36	LSM7, PHB, RPS14, COX11, COX5B, PNPLA4, TAX1BP1, UROD, PXMP2, PQBP1, ZNF91, CHN2, POLR2I, MYLIP, RPL28	Up-regulated
GAZDA_DIAMOND_BLACKFAN_ANEMIA_PROGENITOR_up	0.433023	0.601995	0.315893	1.02396	3348	37	RAB21, U2AF1, CREM, SDHC, ATP6V1B2, HLA-G, DHRS1, FTH1, SDAD1, MRFAP1L1, ZBTB44, BAX, SUPT4H1	Up-regulated
GAZDA_DIAMOND_BLACKFAN_ANEMIA_PROGENITOR_dn	0.000119617	0.00109167	0.559345	2.00432	0	64	CCT6A, PFDN4, BRCA2, ADK, LSM5, THOC7, LYPLA1, NOP56, MAGT1, PDZD8, PRKDC, UBA2, IBTK, GCSH, HSDL2, APEH, PNPLA4, TAX1BP1, RB1, PXMP2, OXLD1, CNOT8, HELLS, FABP5, CAD, LAMP2, FAM149B1, TTC37, NAP1L1	Up-regulated
GAZIN_EPIGENETIC_SILENCING_BY_KRAS_up	0.477549	0.642736	0.332886	0.994578	3498	25	EZH2, E2F1, MRGBP, PDPK1, SIRT6, CTCF, MAPK1, TRIM37, DOT1L, TRIM66, ZCCHC4, ZNF354B	Up-regulated
GEISS_RESPONSE_TO_DSRNA_up	0.808063	0.888985	0.238882	0.778572	6293	38	XPO1, UBQLN1, TAP1, HMGB2, PSMA3, PLAUR, IRF1, ACSL3, GBP1	Up-regulated
GEISS_RESPONSE_TO_DSRNA_dn	0.438579	0.607517	-0.327015	-1.00521	1320	15	STAB1, TP53I3, VCAM1, CDC14A	Down-regulated
GENTILE_RESPONSE_CLUSTER_D3_up	0.000123946	0.00109167	0.553804	1.90061	0	50	CKS2, CDC6, POM121, KIF23, GINS1, AMD1, TUBGCP3, PLK4, SLBP, POLE2, ADNP, DR1, TM4SF1, ZNF623, TRIM13, COIL, FOXJ3, ZFAND5, UNG, LSM14A, CDR2, BLCAP, TAF11	Up-regulated
GENTILE_UV_HIGH_DOSE_up	0.823587	0.898547	0.26289	0.741318	5886	19	PRSS3, MMP3, HTR6, ISG15, PMAIP1, ATF3, HBEGF, COL13A1, COX6A1, SAT1, IL11	Up-regulated
GENTILE_UV_HIGH_DOSE_dn	0.00545548	0.0211022	0.33323	1.38903	52	276	CKS2, CDK8, KPNA2, CDC6, AURKA, STAM, USP1, POM121, MET, KIF23, GINS1, EEF1E1, PTK2, AMD1, KRIT1, ITGA6, TUBGCP3, NOP16, PLK4, CCNB1, LBR, SLBP, XPO1, CSTF3, CUL1, POLE2, E2F3, ADNP, CDK7, HMGXB4, USP10, DR1, EMG1, ZMYND8, NUP153, HMGB2, WEE1, TM4SF1, ZNF623, ASPH, PRSS3, PITPNB, KIF2A, SNRNP40, LSM2, STXBP3, PUM1, LHFPL2, TRIM13, MMP3, ZHX3, TARDBP, RAB11A, COIL, MAT2A, ZNF146, SRSF3, ATP6V1B2, …	Up-regulated
GENTILE_UV_LOW_DOSE_up	0.161321	0.304453	0.427491	1.26663	1181	24	RSL1D1, TAP1, HSPA1A, HSPA1B, TOB1, GPRC5A, GTF2H4, EFNB1, ISG15, PPP1R8, PMAIP1, SOX4	Up-regulated
GENTILE_UV_LOW_DOSE_dn	0.244738	0.408608	-0.24911	-1.10697	406	63	CDK14, CXCL12, FNBP1, PPP2R3A, SEMA5A, RFTN1, EHBP1, SLIT2, PTPRM, ERC1, VEGFC, CDH2	Down-regulated
GENTILE_UV_RESPONSE_CLUSTER_D1_up	0.184447	0.335975	0.465402	1.25619	1294	16	ITGA6, NOP16, E2F3, WEE1, ASPH, STXBP3, STX3, CASP3	Up-regulated
GENTILE_UV_RESPONSE_CLUSTER_D2_up	0.217804	0.37875	-0.291538	-1.16038	481	38	HAS2, SMAD7, ID2, ID1, GAS1, THBS1, NTF3, SECISBP2L, CENPA, ZBED4, MAP1B	Down-regulated
GENTILE_UV_RESPONSE_CLUSTER_D4_up	0.0253024	0.0727464	0.427796	1.48027	204	53	KPNA2, AURKA, USP1, EEF1E1, KRIT1, CCNB1, XPO1, USP10, HMGB2, SNRNP40, PUM1, ATP13A3, ARID5B, GATA2, PHC2, DUSP7, RAB1A, TPST1, BMPR1A, SIAH1, SMURF2, PDCD10	Up-regulated
GENTILE_UV_RESPONSE_CLUSTER_D5_up	0.294577	0.466878	0.351293	1.12631	2264	35	STAM, LBR, PITPNB, LHFPL2, ZHX3, TARDBP, SRSF3, ATP6V1B2, PKP4, HOXB2, MLX, NCOA3, PNO1, MRFAP1L1	Up-regulated
GENTILE_UV_RESPONSE_CLUSTER_D6_up	0.440685	0.609701	-0.260667	-1.01014	1028	34	LPAR1, PDGFRA, CXCL12, TLE4, QKI, PRRX1, UGCG, BCAR3, ARL4C, STRN3	Down-regulated
GENTILE_UV_RESPONSE_CLUSTER_D7_up	0.542194	0.699669	0.298538	0.951941	4156	34	CDK8, MET, CUL1, EMG1, LSM2, RAB11A	Up-regulated
GENTILE_UV_RESPONSE_CLUSTER_D8_up	0.21593	0.376297	0.367619	1.19163	1669	37	TOP2A, CBX3, INSIG1, PARP1, PPID, HNRNPH3, HMGCR, STK24, TSPAN5, JUN, SQLE	Up-regulated
GENTILE_UV_RESPONSE_CLUSTER_D9_up	0.0480415	0.123116	0.492556	1.47163	351	25	TMEM97, RRS1, CCNA2, DNAJB1, IDI1, IST1, CD2AP, UBR5, NAP1L1, CCNG1	Up-regulated
GENTLES_LEUKEMIC_STEM_CELL_up	0.330422	0.50312	-0.292951	-1.07675	869	27	FCMR, MMRN1, SETBP1, EVI2A, GIMAP7, MEF2C, GIMAP2	Down-regulated
GENTLES_LEUKEMIC_STEM_CELL_dn	0.232303	0.394641	0.444976	1.20105	1630	16	ANLN, SKA3, DLGAP5	Up-regulated
GEORGES_CELL_CYCLE_MIR192_TARGETS_up	0.00157805	0.00766367	0.479716	1.69086	12	59	POLQ, MKI67, USP1, BRCA1, KIF23, MCM10, KIF20B, TUBGCP3, DEK, TOP1, MCM3, DBF4B, PPP1CA, HOXA10, CDC7, RB1, SMARCB1, SH3BP4, PRPF38A, KIF14, MAD2L1, CUL5, NBN, CDC73, CTCF, RAD51, DLG5, MCM6	Up-regulated
GERHOLD_ADIPOGENESIS_up	0.412754	0.587115	0.304745	1.03705	3313	48	SCD, PPA1, LDHB, PDHA1, ANAPC1, COX8A, PPARG, FABP5, VLDLR, LIPE, CIDEC, ALDH2, STAT5A, CEBPB	Up-regulated
GERHOLD_ADIPOGENESIS_dn	0.310512	0.482704	0.312887	1.10284	2557	59	CCT5, CCT2, IFRD1, DNAJB1, ANXA3, ATF1, HSPA8, CCND1, CD9, HGFAC, G0S2, CDK4, ANXA2, THBD, TUBB, PDGFRB, DDB1, SAE1, ITGB1, ZNF148, MMP14, BAX, TUBA1A, SOX4, FN1	Up-regulated
GERY_CEBP_TARGETS_up	0.304867	0.476828	0.279785	1.09375	2755	126	HSPH1, CHORDC1, MVD, TFRC, NSDHL, IFRD1, DNAJB1, CD47, GIPC2, ZFAND2A, HSPA1A, EIF1AX, PPARG, CD68, CYB5R1, HMGCR, BAIAP2, NUS1, HSPA1B, CXCL6, HGSNAT, TRIB3, TGOLN2, DNAJB9, LCN2, PLAUR, SSR1, NR1D1, EREG, TOM1L1	Up-regulated
GESERICK_TERT_TARGETS_dn	0.0226782	0.0667867	-0.469375	-1.59723	62	21	ZFP36, KLF9, EGR2, FOSB, NR4A1, IER3, KLF4, BTG2	Down-regulated
GHANDHI_BYSTANDER_IRRADIATION_up	0.415917	0.590156	-0.216971	-1.01652	600	80	IL13RA2, MT1X, MT1B, MT1H, MT1G, POU2F2, CD69, LIF, RGS9, MT1E, MCTP2, GCH1, KYNU, PTGFR, IRAK3, MCTP1, ZC3H12C, TNFSF15, GCLM, POPDC3, ZSWIM8, DUSP2, FGF2, SLC6A15, PHEX, IL1A, C9orf72	Down-regulated
GHANDHI_DIRECT_IRRADIATION_up	0.194608	0.349642	-0.229844	-1.11935	230	101	MT2A, MT1X, MT1B, MT1H, IL6, MT1G, TIGAR, LIF, RGS9, GDNF, ANKRD20A1, MT1E, PTPRE, FAS, THSD1, GPATCH2L, NEFM, TNFRSF10C, BMP2, GCH1, KYNU, BBC3, PTGFR	Down-regulated
GHANDHI_DIRECT_IRRADIATION_dn	0.0501898	0.127478	-0.373947	-1.43979	118	33	NR3C2, PRDM6, S1PR1, TOX, ARHGEF25, OPRL1, MN1, HOXB3, CCDC85C	Down-regulated
GHO_ATF5_TARGETS_dn	0.0331862	0.0909803	0.569235	1.53645	232	16	TRIP13, ITGA2, KIF20A, BTN3A2, RPN1, YWHAH, ACTN4	Up-regulated
GILDEA_METASTASIS_up	0.0449787	0.116444	-0.395814	-1.46483	115	28	CPQ, MPZL2, BST2, PTX3, TAGLN, ARHGDIB, IFI16, SPARC, IGFBP4, ADIRF, TIMP3, GLIPR1	Down-regulated
GINESTIER_BREAST_CANCER_20Q13_AMPLIFICATION_up	0.000113314	0.00109167	0.475674	1.81666	0	102	PDP2, PARD6B, PSMA7, PDP1, SNORA71B, STAU1, ROMO1, DDX27, MAGT1, TOX4, KCTD20, SERINC3, SMAD5, YWHAB, ADNP, UQCC1, CACNG4, CTNNBL1, STX16, RBM39, SLC39A6, PRRC1, ERGIC3, HSP90AA1, STAG2, ZNF587, ENPP1, TPR, ARFGEF2, ZNF91, DPM1, UBBP1, RSPH3, UHMK1, DNAJC21, FITM2, RDH11, NCOA3, ZNF552, KIF5B, ZNF148, AZI2, EFCAB11, MORF4L2, ZNF217	Up-regulated
GINESTIER_BREAST_CANCER_20Q13_AMPLIFICATION_dn	0.000750429	0.00428033	0.393073	1.58283	6	171	NAA16, MKI67, DAZAP1, TRA2A, RNPS1, PROSER1, EHMT2, FNBP4, CHEK1, SRSF2, SFPQ, FUBP1, TYW5, ACSL5, CCNJ, CCNL1, ENGASE, NUP62, LARP1, SET, HNRNPH3, PTBP1, SUPT20H, MCM3, RBM26, AGO4, NPIPB3, RAPGEF1, PCGF6, NUP214, UQCC2, PPHLN1, CAPN15, PUM1, PSPC1, FANCL, XPO6, PRRC2A, SLC15A4, ECHDC1, CALML4, HINT1, PHF11, SMC4, NSUN5, DHX16, DGKZ, CCDC77, KDM4A, TMEM147-AS1, SNAPC4, TCOF1, TAZ, ZNF436-AS1, CC…	Up-regulated
GINESTIER_BREAST_CANCER_ZNF217_AMPLIFIED_up	0.506261	0.669885	0.271257	0.978161	4244	67	PDP2, ICE2, KCTD20, SLC25A36, STX16, ATG12, ZBTB38, HEATR3, SRSF10, STAG2, SLC35A3, SLC17A5, RSPH3, DNAJC21, LACTB, CYP20A1, SLU7, GNB5, SIAH1, MORF4L2, SCAF11, INIP, RSBN1L	Up-regulated
GINESTIER_BREAST_CANCER_ZNF217_AMPLIFIED_dn	0.000102062	0.00109167	0.395878	1.66394	0	318	TMEM63A, DAZAP1, MOGS, RNPS1, POLR2F, PPM1G, NOL8, COPS7B, EHMT2, GAS5, FNBP4, RPL18, TYW5, UPB1, ACAD10, NPM3, LPAR2, RHEB, ARPC5L, SH3BP1, ENGASE, TBC1D22B, ZBTB7B, NUP62, SPHK2, FANCA, LARP1, RAD54L2, TRMU, SLC15A3, MCTS1, PHKG2, PTBP1, EVI5L, FKBP1A, DAGLB, RASSF7, NPIPB3, MESP1, THOC2, RBM14, NUP214, PHF5A, MARK2, GFER, UQCC2, PQBP1, RAP1GAP2, CAPN15, SYMPK, TARDBP, TNK2, HNRNPU, MAPRE3, MIC…	Up-regulated
GNATENKO_PLATELET_SIGNATURE_up	0.154003	0.295242	0.38308	1.25599	1207	39	TUBA4A, OAZ1, B2M, CFL1, ITGA2B, PTMA, NRGN, YWHAH, UBC, RPL41, MLH3, DYNLL1, TAGLN2, PF4, GPX1, ACTB, FTH1, FTH1P5, TLN1, PGRMC1, PKM, PPBP, MYL12A, RNF24	Up-regulated
GOBERT_CORE_OLIGODENDROCYTE_DIFFERENTIATION_up	0.471528	0.637429	0.302083	1.00082	3717	42	HBP1, E2F1, ZKSCAN1, CDK6, SLC25A27, RNF13, IKZF5, ENPP6, OPCML, NDRG1, CCNG1	Up-regulated
GOBERT_OLIGODENDROCYTE_DIFFERENTIATION_up	0.000100381	0.00109167	0.569326	2.44302	0	537	TMEM97, CKS2, CDCA7, TPX2, PLK1, PTTG1, EXOSC8, BRCA2, HJURP, EZH2, CCDC34, XRCC2, CDKN3, PRR11, ATAD2, KPNA2, PA2G4, CDCA5, LIMK1, SKA3, DDAH1, MKI67, UMPS, DKC1, NDC1, CDC6, SKP2, BUB1, CHAF1B, STIL, MELK, AURKA, CDK1, CCNA2, RAD51AP1, NOLC1, RBL1, PARPBP, USP1, FANCD2, TTK, PRIM2, UBE2C, TRIP13, CEP55, LSM5, CKAP2, LYAR, SNX7, TOP2A, DCTPP1, RFC2, PDSS1, UBE2T, GINS2, KIF23, DUT, CKS1B, GINS1,…	Up-regulated
GOLDRATH_ANTIGEN_RESPONSE_up	0.000101616	0.00109167	0.45993	1.94018	0	339	TMEM97, CKS2, ANLN, PLK1, PLBD1, EZH2, CDKN3, KPNA2, CDCA5, MKI67, PERP, E2F8, CDC6, BUB1, AURKA, CDK1, CCNA2, RAD51AP1, TTK, PRIM2, TRIP13, GGH, BRCA1, CKAP2, RPA3, SLC39A4, MRPL18, TOP2A, UBE2T, SYPL1, GSTO1, CKS1B, TMEM126A, TMEM14C, POLA1, MCM10, TMPO, PLK4, CCNB1, CCNB2, MTHFD2, CHEK1, TXN, DBI, PCNA, PLP2, GTSE1, PRC1, CCNF, STMN1, RAN, KIF20A, CDC25C, BIRC5, SERINC3, PGAM1, S100A11, SIVA1,…	Up-regulated
GOLDRATH_HOMEOSTATIC_PROLIFERATION_up	0.000109302	0.00109167	0.521485	2.05911	0	138	SLC7A5, HSPE1, PTGES3, CACYBP, BZW2, TIAL1, PPA1, SNRPE, LAGE3, ATP6V0B, AGFG1, NOP16, RPIA, SFPQ, FUBP1, NIFK, NPM3, MAGOH, E2F1, EIF3J, NDUFAB1, TMX2, HDGF, MRPS33, DHX9, RAB18, TAF1D, NDUFB2, NME1, VDAC2, PCBD2, SET, CYCS, NABP1, SEMA4F, TM9SF3, UBE2E1, CETN3, STT3A, ATP11A, GK, NDUFB3, YME1L1, HNRNPA1, SDHC, IRAK1, PARK7, IPO7, TGOLN2, ITGB1BP1, NHP2, RAD23B, VAMP4, UBL5, RAB5C, UNG, PRPS2, F…	Up-regulated
GOLDRATH_IMMUNE_MEMORY_up	0.435544	0.60404	0.286378	1.02341	3631	63	DOCK9, VRK1, FHIT, ANKH, SEMA4F, RRM2B, CHCHD7, ECI1, GK, VKORC1, HCFC1R1	Up-regulated
GOLUB_ALL_VS_AML_up	0.0496793	0.126339	0.495489	1.4681	363	24	STMN1, MYB, MCM3, PSMA6, NUP88, SRP9, CBX1, GTF2E2, MYL6B, DYNLL1, RBBP4, TOP2B, ZNF22	Up-regulated
GOLUB_ALL_VS_AML_dn	0.41196	0.586494	0.360225	1.03958	2975	21	PPIF, CXCL8, AZU1, SQSTM1, LGALS3, CAT, CTSD, LYN	Up-regulated
GOTTWEIN_TARGETS_OF_KSHV_MIR_K12_11_up	0.712369	0.826369	0.242022	0.85713	5891	60	PTDSS1, TRIP13, E2F3, MYB, C9orf116, WEE1, ARHGAP21, RNF31, GPSM2, POLE3, RNF123, HMGCS1, TAF12, SEC13, DPY19L1, HSPA5, SLC33A1, TWF1, AGTRAP, MYO1D	Up-regulated
GOTZMANN_EPITHELIAL_TO_MESENCHYMAL_TRANSITION_up	0.0571564	0.140916	0.376875	1.36731	481	69	CCT6A, TPP2, MKI67, RBL1, HMGB1, BRCA1, PLK4, CHEK1, RPSA, TOP1, MCM3, ODC1, OAT, JUN	Up-regulated
GOTZMANN_EPITHELIAL_TO_MESENCHYMAL_TRANSITION_dn	0.000105496	0.00109167	0.406725	1.65874	0	199	TFAM, STIP1, PA2G4, VDAC1, POLR1D, TOP2A, PIGF, STK3, SDC4, MYC, CDKN2A, XRN2, CDH1, AMD1, YWHAZ, MTHFD2, RPL18, SLC3A2, HAX1, GDI2, GSS, TCEA1, OAZ1, RAB18, AHCY, NPEPPS, PPARG, TM4SF1, CLNS1A, CCT3, CNIH1, UBE2H, HNRNPH1, CYP2J2, TKT, CFTR, ENPP1, ANXA7, CTNNB1, SRSF1, HS3ST1, SEPHS2, SEC22B, HELLS, CXCL6, CAPZA2, SOD1, ITGB4, TOB1, DDX19A, CBX1, PFKL, FNTA, DDOST, YWHAH, KRT15, PFN1, OSTF1, FK…	Up-regulated
GOUYER_TATI_TARGETS_dn	0.682877	0.805304	-0.264293	-0.846773	1993	17	A4GALT, TAGLN, HPN, IGFBP2, MAPK12, LOXL4, TIMP4	Down-regulated
GOZGIT_ESR1_TARGETS_up	0.71018	0.824869	-0.179845	-0.92623	592	142	DOCK10, PRKAR2B, ADAMTSL4, FRY, PEG10, NPTX1, CLMP, ACACB, SEMA5A, DST, AGXT, FHL1, GAS1, FOS, OBSL1, FERMT2, VWDE, ANPEP, ITSN1, SORCS2, ZNF831, ECM1, SMPDL3A, TNFAIP8	Down-regulated
GRABARCZYK_BCL11B_TARGETS_up	0.608855	0.750246	0.252817	0.924999	5156	74	STK26, TRUB1, PIK3R1, ANKRD46, AK4, U2AF1, AASDHPPT, TMEM167A, PPIP5K2, NUS1, ZNF678, PDCD6IP, PLEKHA8, ANXA2, USO1, SPOPL, NQO1, PRKCQ-AS1, MSI2, GMFB, SLC30A9, S100A4, PEX26, SLC35A1, BICD2, CCSER2, MYCN, ADCYAP1, BNIP3, PAFAH1B2, TIMP1, ACACA, ZDHHC21	Up-regulated
GRABARCZYK_BCL11B_TARGETS_dn	0.207566	0.365643	0.338323	1.18305	1700	56	SYK, UBE2V2, SFR1, NAA50, UQCRC2, ETV5, PPP3CB, GSTCD, STAU2, TFDP2, GM2A, C4orf3, GALNT6, ASF1B, DUSP7, TTYH2	Up-regulated
GRADE_COLON_AND_RECTAL_CANCER_up	0.000102934	0.00109167	0.714686	2.98046	0	279	TMEM97, CKS2, CDCA7, PLK1, ATIC, VKORC1L1, HJURP, POLQ, ALG1, EIF2S2, FERMT1, PDCD2L, CD46, PA2G4, SAP18, SKA3, GLO1, ZDHHC9, NIP7, POMP, NOB1, PERP, EPHB2, HSPE1, DNAJC2, EIF3E, CDC6, MELK, SLC12A2, AURKA, CDK1, PSMG1, PSMA2, PTDSS1, EIF6, HMGB1, INTS7, CCT5, POLR1D, LYAR, MTHFD1, NAA10, DGAT2, PPA1, RFC2, MYC, KIF23, HSPA9, FBL, TGDS, CCT7, XRN2, NOP56, EEF1E1, PNPT1, IFRD1, ZFAND1, GTF3A, NOL8…	Up-regulated
GRADE_COLON_AND_RECTAL_CANCER_dn	0.00673968	0.0248979	-0.30478	-1.4843	7	101	PTPRZ1, PDK4, ADAMTSL4, B3GALNT1, PRKACB, TLE4, NR3C1, CHST15, PLPP1, CPN2, PLAC8, FHL1, GFI1, CD28, PARM1, C2orf88, NAV1, DHPS, HAUS5, KRT84, ST6GALNAC6, SOCS2, LRTOMT, PCDHB5	Down-regulated
GRADE_COLON_VS_RECTAL_CANCER_up	0.0223803	0.0661636	0.474983	1.53347	172	36	UMPS, ALG5, LAGE3, RAD18, TEX10, INSIG2, FAM217B, DESI2, ENGASE, FOCAD, ZWILCH, CANX, DDX50	Up-regulated
GRADE_COLON_VS_RECTAL_CANCER_dn	0.888527	0.939908	0.213725	0.7236	7101	47	ESPL1, SLC31A1, RPL17, RAD23A, CPSF7, MPI, FCF1, TAGLN2, ULK1, DUSP7, ANP32A, PHLDA1, PYY2, ANKRD40, POLL, AP5Z1	Up-regulated
GRAESSMANN_APOPTOSIS_BY_SERUM_DEPRIVATION_up	0.249147	0.414314	0.251724	1.08017	2481	537	CHAC1, VDAC1, WDR4, HSPA14, INTS7, DIMT1, PES1, PARP12, UBE2I, PIP5K1B, SLC39A4, INTS8, MYC, CCNC, RPL35, PNPT1, NMD3, UBE2V2, TRMT10A, TMPO, SPTLC1, CUL4A, TBCA, MRPL57, WNT7B, RRP15, PLP2, SMYD5, DFFB, NIFK, MCCC2, ACOT6, RPS18, OSGIN2, PHIP, URI1, CCT4, EBNA1BP2, PPIF, TAF1D, NDUFB2, HEATR1, WDR75, PPID, ZNF207, SPHK2, NCL, ENC1, ALG13, CXCL3, SFXN2, ATF4, MEPCE, RPE, DNAJC3, PNP, TM4SF1, HNF4…	Up-regulated
GRAESSMANN_APOPTOSIS_BY_SERUM_DEPRIVATION_dn	0.619733	0.758088	0.228996	0.943907	5941	226	UBXN2A, SCCPDH, DGAT2, BCL11A, MRPL48, PAPOLA, PLAGL2, RAB2A, TBL2, ASS1, ST6GALNAC4, ERAL1, TACC3, OSBPL6, KIF2A, STC1, HILPDA, RSPH6A, NOXO1, DUSP9, ATP13A2, JUN, GCLC, FBXO21, TES, HOMER1, TNFRSF1B, CA9, GPR35, MED24, GATA2, MICAL1, PDXK, SERPINB1, NASP, DEPTOR, KLK9, PIGU, PAXIP1, RIC8A, FAM162A, NDRG1, THA1P, CDR2, COG1, ANP32A, PFN2, TRAP1, BORCS7, ERO1A, NOS2, REM2, ALX3, ELF5, RALGPS1, TP…	Up-regulated
GRAESSMANN_RESPONSE_TO_MC_AND_DOXORUBICIN_up	0.0245663	0.0712916	0.28307	1.21796	244	586	SAP18, PERP, CHAC1, STOML2, MYCBP, TMEM41A, SORD, UBE2I, CKAP2, POM121, SLC39A4, DGAT2, F11R, UBE2T, RHPN2, SLC25A22, FAM83H, SPC25, FAM32A, ITGA6, ATP6V0B, DNAJB1, SAC3D1, CUL4A, DEPDC7, WNT7B, GTSE1, DFFB, BRIX1, ATG3, ZFAND2A, RNF128, SPRYD4, ACOT6, GPAT4, E2F1, GGA2, SERINC3, MAPRE1, ALDH4A1, TUBA4A, PAQR4, PPIF, GSS, C1QTNF1, ASS1, ST6GALNAC4, PLEK2, AK4, SLC31A1, RPE, PNP, ICAM5, IRAK1BP1, …	Up-regulated
GRAESSMANN_RESPONSE_TO_MC_AND_SERUM_DEPRIVATION_up	0.789366	0.8795	-0.167472	-0.90329	385	209	OGN, FSTL1, METTL7A, ABI3BP, STEAP4, DPF3, CNTNAP4, CEP112, HHAT, PCDHB16, PHLDB2, BST2, CP, GHR, ZBP1, APOL3, MYOC, CAPN6, FAS, SLFN12, HSD11B2, UBA7, NEUROG3, SENP1, TP53INP1, RNF144B, IAPP, HIPK2, DLC1, CSF1, KALRN, DKK3, OSR1, SYCP3, KCTD12, C3, SLFN12L, TXNIP, ADCY7	Down-regulated
GRAESSMANN_RESPONSE_TO_MC_AND_SERUM_DEPRIVATION_dn	0.35637	0.532761	0.286592	1.06527	3062	83	UBXN2A, PLAGL2, RAB2A, ZNF706, KIF2A, DNAJB6, TES, HOMER1, CA9, GPR35, SLC25A14, MED24, SERPINB1, NASP, KLK9, PIGU, PAXIP1, IL24, CRB3, CDR2, ERO1A, REM2, ALX3, MKNK1, TPD52, ODF2, COPB2, CLDN3, GBE1, PORCN, EFHD2, KDELR3, PPFIA4, GALK1, CDC37, SLC25A29, EPB41L4B, HIGD1A, TMEM191C, HID1	Up-regulated
GRAHAM_CML_DIVIDING_VS_NORMAL_QUIESCENT_up	0.000106746	0.00109167	0.607129	2.45107	0	176	TPX2, CSE1L, SLC7A5, EZH2, CDKN3, KPNA2, E2F8, CDC6, BUB1, MELK, AURKA, CDK1, CCNA2, RAD51AP1, HSPA14, TTK, SORD, UBE2C, TRIP13, CEP55, GGH, BRCA1, LSM5, RPA3, SLC25A13, TOP2A, PDSS1, GINS2, DUT, CKS1B, GINS1, CENPM, RFC4, MCM10, SPC25, SAC3D1, CCNB1, CCNB2, CENPF, DHFR, CHEK1, PRC1, RMDN1, STMN1, NPM3, MRPS15, STK39, KIF20A, POLE2, SYNCRIP, BIRC5, NCAPG, GSPT1, SUB1, RANBP1, PPIF, DLGAP5, VRK1, …	Up-regulated
GRAHAM_CML_DIVIDING_VS_NORMAL_QUIESCENT_dn	0.251841	0.418002	-0.230355	-1.09326	341	85	ADAM28, CYTIP, CD200, IL18R1, MPZL2, ENPP4, FNBP1, BAALC, CH25H, EVI2A, TPBG, IFI16, TCF4, TRIM22, EMP1, ERG, TNFSF4, PCDH9, TNFSF10	Down-regulated
GRAHAM_CML_QUIESCENT_VS_CML_DIVIDING_up	0.112832	0.233319	0.455474	1.3373	822	23	CXCL3, NFAT5, CCL20, CXCL8, CXCL6, JUN, IL1B, TRA2B, CXCL5, CXCL1, RGS1	Up-regulated
GRAHAM_CML_QUIESCENT_VS_NORMAL_DIVIDING_up	0.390337	0.565006	-0.238086	-1.03422	718	55	CA1, PRKAR2B, HBA1, PTX3, CDC42BPA, HBB, XIST, CCL5, NR4A2, MAFF	Down-regulated
GRAHAM_CML_QUIESCENT_VS_NORMAL_QUIESCENT_up	0.00574383	0.022045	0.419809	1.57629	49	88	EZH2, CDKN3, MELK, CDK1, CEP55, TOP2A, APOC1, GINS1, SAC3D1, CCNB2, CENPF, DHFR, CHEK1, PRC1, PPIF, DLGAP5, BAZ1A, KIF11, NUDT4, CCL20, MPST, ITGA2B, CDC20, CPOX, JUN, MINPP1, SMC2, KIF15	Up-regulated
GRAHAM_CML_QUIESCENT_VS_NORMAL_QUIESCENT_dn	0.990242	0.995028	-0.148697	-0.598794	2130	40	MPZL2, FHL1, BAALC, EMP1, PCDH9, GLIPR1, HLA-DQB1, ALOX5, SPINK2, APP, HLA-DPB1, SELL, AIF1, HLA-DPA1, HLA-DMB	Down-regulated
GRAHAM_NORMAL_QUIESCENT_VS_NORMAL_DIVIDING_up	0.166021	0.310901	-0.271846	-1.18252	299	56	CYTIP, IL18R1, MPZL2, FNBP1, DST, STAT4, EVI2A, TPBG, NR4A2, KYNU, EMP1, MAFF, TNFSF4, PCDH9, TNFSF10, GLIPR1, OPTN, ALOX5, CCL19	Down-regulated
GRAHAM_NORMAL_QUIESCENT_VS_NORMAL_DIVIDING_dn	0.000116171	0.00109167	0.680537	2.53481	0	84	CSE1L, SLC7A5, CDKN3, CDC6, BUB1, MELK, CDK1, CCNA2, RAD51AP1, TRIP13, CEP55, GGH, TOP2A, GINS2, DUT, CKS1B, GINS1, CENPM, RFC4, MCM10, SAC3D1, CCNB2, DHFR, CHEK1, PCNA, PRC1, NPM3, POLE2, BIRC5, NCAPG, PPIF, DLGAP5, VRK1, RFC3, KIF11, VDAC3, HAT1, KIF2C, CCNE2, FEN1, FABP5, CDC20, RRM1, MINPP1, MSH2, SMC2, DSCC1, KIF15, MAD2L1, CDC45, NUSAP1	Up-regulated
GRANDVAUX_IRF3_TARGETS_dn	0.759476	0.859781	-0.241939	-0.790707	2203	18	GEM, PPP2R3A, MFAP5	Down-regulated
GRATIAS_RETINOBLASTOMA_16Q24_up	0.0240045	0.0700208	0.577725	1.58686	169	17	SLC7A5, EMC8, ZCCHC14, USP10, MBTPS1, FBXO31, TRAPPC2L, ANKRD11, TCF25, SPG7, MAP1LC3B	Up-regulated
GREENBAUM_E2A_TARGETS_up	0.000133851	0.00109376	0.675205	2.08149	0	29	ANLN, SLC7A5, MKI67, BUB1, SLC12A2, AURKA, CCNA2, TTK, TOP2A, EIF4EBP1, PLK4, CCNB1, CCNB2, KIF11, KIF2C, HS3ST1	Up-regulated
GREENBAUM_E2A_TARGETS_dn	0.599608	0.745104	0.320132	0.902735	4285	19	SERINC3, XRCC6, TMSB10, GM2A, DESI1	Up-regulated
GREGORY_SYNTHETIC_LETHAL_WITH_IMATINIB_up	0.206281	0.363938	0.291424	1.15093	1884	139	RPL21, DDAH1, ZP3, RPL35, DBF4, LAPTM4B, TRIM24, RPL36A, RPL5, CST4, NKRF, ITCH, SRI, SNX10, BAD, EHF, CEACAM1, ATP6V0E1, CTDSPL, CYP2B6, GTF2H5, UTP14A, AZGP1, LIPE, CAPRIN1, PGAP2, CTSB, ZNF473, LDLRAD4, GAPDH, GBP4, RTP4, NCOA3, IRF7, TNFRSF9, ITGB1, CUX1, GGCX, CLDN3, IL27RA, SCAF11	Up-regulated
GRESHOCK_CANCER_COPY_NUMBER_up	0.00337527	0.0142144	0.33278	1.39655	32	310	ATIC, BRCA2, STIL, ZNF384, FANCD2, TFRC, BRCA1, NCKIPSD, HSP90AB1, MET, MYC, CDKN2A, EIF4A2, BCL11A, CDH1, SYK, DDX10, DEK, GMPS, SFPQ, HOXA13, TRIM24, NPM1, COX6C, PMS2, ATF1, TCEA1, FANCF, VHL, CBFB, TOP1, CDK6, FANCA, SBDS, SET, SDHB, PPARG, HMGA1, ERCC4, HSP90AA1, FANCE, BCL10, RPL22, CCND1, RECQL4, RB1, NUP214, TMPRSS2, NCOA2, CDX2, CTNNB1, TPR, DDB2, XPA, ABI1, THRAP3, TFG, SUZ12, RPN1, SDH…	Up-regulated
GROSS_ELK3_TARGETS_up	0.431555	0.601273	0.342792	1.02417	3161	25	NARS2, TUBA1B, ASS1, CPD, CCND1, MYLIP, GPX1	Up-regulated
GROSS_ELK3_TARGETS_dn	0.319696	0.491527	-0.280232	-1.07896	757	33	ADAMTS1, CSRNP1, PRKG2, IL6, PGM1, ADAMTS4, RAMP3, MAFF	Down-regulated
GROSS_HIF1A_TARGETS_dn	0.248533	0.413714	0.393108	1.1745	1820	25	RPL27, LDHB, AK4, TPI1, ENO1, PFKL, FAM162A, GAPDH, ERO1A, LGALS3, GBE1	Up-regulated
GROSS_HYPOXIA_VIA_ELK3_up	0.000947668	0.00516227	0.377044	1.53963	8	201	SCD, KPNA2, CDCA5, SLC12A2, CCNA2, UBE2C, TFRC, NDE1, GART, SRSF7, ARL6IP1, AMD1, ACP1, SAC3D1, CCNB1, CCNB2, SRSF2, DBI, STMN1, KIF20A, SEPHS1, BIRC5, SERINC3, TUBA1B, PGAM1, AJUBA, NEDD4, CBFB, PRKAR2A, DTYMK, EIF1AX, DDX39B, EXO1, SRSF10, SLC19A2, PYCR2, CCND1, ARHGAP11A, PCMT1, DOK4, UBOX5, TUBA1C, SRSF1, HELLS, PDRG1, MGAT4B, TARDBP, MR1, RPA2, MAT2A, MINPP1, DPP7, NCAPD2, TRIM21, TUBB4B, NC…	Up-regulated
GROSS_HYPOXIA_VIA_ELK3_dn	0.472986	0.638876	0.253104	1.00565	4350	147	RAD54B, MYC, IFRD1, ITGA6, MTHFD2, RABGEF1, HAX1, ATF1, SLPI, CXCL3, ATF4, ASNS, TM4SF1, RIOK1, PTBP3, PRDX5, BCL10, EHF, CSF3, HILPDA, ENO1, CXCL6, VLDLR, ADIPOR2, LAMP2, SPRY2, THBD, RAD23B, TRAF6, GZF1, CEBPB, ZNF398, NDRG1, HSPA5, ZBTB20, CXCL10, LILRB4, TRPS1, ERO1A, PFKFB3, CACNA1H, TGIF1, CTH, SCAF11, GBE1, NOCT, KLF6, GSPT2, USP47, DUSP4, ACAP2, JMJD1C, HBEGF, FGB, FBXO42	Up-regulated
GROSS_HYPOXIA_VIA_ELK3_AND_HIF1A_up	0.843339	0.912527	0.204541	0.806366	7697	136	SDC4, SPRY4, AIMP2, INSIG2, PGAM1, VHL, AK4, CNOT7, TM4SF1, P4HA1, DDX39B, PRDX5, BCL10, TPI1, HILPDA, ANXA2, HOMER1, SPRY2, GPRC5A, SLC19A1, TRAF6, GZF1, NAP1L1, MXI1, FAM162A, NDRG1, SPAST, ZBTB20, PPP1R3B, ME2, PHLDA1, PFKFB3, TGIF1, CYP21A2, DUSP16, GBE1, NOCT, KLF6, RORA, XPNPEP1, ATF3, DUSP4, ACAP2, JMJD1C, HBEGF, DUSP14, PTCH1, MERTK, BNIP3, PGF, HIGD1A, CXCL2, CLCN5, PPRC1	Up-regulated
GROSS_HYPOXIA_VIA_ELK3_AND_HIF1A_dn	0.0131594	0.0428985	0.387502	1.47766	115	100	KPNA2, CACYBP, UBE2C, GART, SRSF7, MOGS, AMD1, ACP1, SAC3D1, CCNB1, PPAT, SRSF2, HACD3, EXO1, SRSF10, ETS2, PYCR2, TEX30, CPD, CCND1, TMEM176A, SRSF1, SEPHS2, MGAT4B, LSM2, TARDBP, MAT2A, RAD23B, TRIM21, CHN2, GATA2	Up-regulated
GROSS_HYPOXIA_VIA_ELK3_ONLY_up	0.500633	0.665438	-0.252398	-0.971793	1186	33	SLC20A1, IL6, AKAP12, CH25H, FST, PGM1, NAIP, LCP1	Down-regulated
GROSS_HYPOXIA_VIA_ELK3_ONLY_dn	0.23545	0.39751	0.349434	1.1681	1864	44	NDE1, KIF23, CDC25B, STMN1, CSF3, DOK4, UBOX5, PDRG1, MINPP1, EIF2AK2, NCBP2, NFIC	Up-regulated
GROSS_HYPOXIA_VIA_HIF1A_up	0.000118064	0.00109167	0.525433	1.92244	0	74	KPNA2, CACYBP, BZW2, DDX21, TFRC, GART, SRSF7, MOGS, NOP56, TIMM9, AMD1, HSPD1, ACSL5, HACD3, SRM, TAF1D, RPL5, PPID, PSMB5, DDX39B, CCT3, USP42, SRSF1, MGAT4B, HSF1, TARDBP, MAT2A, NOP58, SLC19A1, TRIM21, CHN2, NAP1L1, RCC2, GTF2E1, RCL1, CTPS1, ACSL3, G3BP1, SRSF5, SHMT2, EXOSC1, CTH, CCNH, ELOVL1	Up-regulated
GROSS_HYPOXIA_VIA_HIF1A_dn	0.94866	0.970022	0.181942	0.698287	8425	105	DNAJC5, LMO7, INSIG2, VHL, NPEPPS, TOMM40, PRDX5, CPD, HILPDA, ENO1, MMP3, CMC4, SH3BP4, ZNF143, SPRY2, TRAF6, GZF1, S100A13, GAPDH, ME2, LNPEP, PFKFB3, CACNA1H, TGIF1, CAPN1, GBE1, POLR2D, NOCT	Up-regulated
GRUETZMANN_PANCREATIC_CANCER_up	0.000101533	0.00109167	0.386002	1.63014	0	345	CKS2, CSE1L, MKI67, SNRPB2, MELK, CCNA2, VDAC1, UBE2C, KLF5, TOP2A, APOC1, NSDHL, CKS1B, RFC4, CBR1, CBX3, ARL6IP1, EXOSC7, YWHAZ, CDC25B, MMP9, CENPF, SLBP, POLB, CD47, XPO1, GABRE, STMN1, ITGA2, SNRPA, R3HDM1, NUP93, CETN2, S100P, PRDX1, MSMO1, S100A11, PHB, CDK7, DHX9, PRKDC, CLIC1, RAB2A, DNAJA1, CBFB, TAP1, PSMB3, SLPI, TOP1, AKAP1, ZMYND8, PNP, HMGB2, P4HA1, SRI, GNPDA1, NDUFA9, MCM3, ETFB,…	Up-regulated
GRUETZMANN_PANCREATIC_CANCER_dn	0.36008	0.536218	0.260303	1.05939	3405	194	RPL13, MYC, AMD1, DPEP1, PWP1, PCBD1, HYOU1, RPS7, SLC25A3, LGALS8, RPS24, PPIF, IMPDH2, ANXA4, RPS9, MYO1F, IGBP1, RPL17, RPS10, ETV5, RPL7A, MAPK9, SRP54, ICA1, JUN, SEC61B, DDT, MAT2A, TOB1, TOMM20, DANCR, FKBP2, DSTN, LAMP1, TRPV6, FXYD2, YBX3, RFC1, P4HB, UBXN8, ACSM3, CRYZ, MEST, PABPC4, SSR1, ISG15, MXI1, RPL32, CTNND2, SLC33A1, KCNJ4, SLC25A5, SHC3, GTF3C1, CYB5A	Up-regulated
GRYDER_PAX3FOXO1_ENHANCERS_KO_DOWN_up	0.00151423	0.00744467	0.326079	1.38796	14	421	ANLN, HSPH1, MIPEP, GLO1, EPHB2, SKP2, MDH2, PON2, TCF20, NOLC1, VDAC1, USP1, EXOSC2, POLR1D, CDC123, MET, GART, CCNC, BCL11A, CEBPZ, C1GALT1, GTF3A, YWHAZ, ERLIN2, RRP15, PCBD1, NPM3, ARL8B, CACUL1, PROX1, TEX10, NAA20, FAM217B, PARP1, FANCF, TRIQK, VRK1, ASS1, ENC1, COX11, HNRNPK, TSC22D2, RFC3, HUNK, BFAR, ARHGAP12, DCTD, HSPA4, BCOR, VTI1A, MIOS, AGPAT5, LDLRAD3, MIF, ETV5, FGGY, ZNF664, PAFA…	Up-regulated
GRYDER_PAX3FOXO1_TOP_ENHANCERS_up	0.000100918	0.00109167	0.370721	1.57869	0	424	TPX2, ANLN, HSPH1, COA6, PFDN4, BRCA2, GLO1, MDH2, PON2, NOLC1, GPR89B, USP1, TTK, CHCHD3, SLC7A1, CDC123, TOP2A, GART, GINS2, RSL1D1, FAM83D, CEBPZ, MRPL20, FAM136A, NCAPG2, YWHAZ, ERLIN2, TBCA, WDR43, CBWD1, RNF114, PCBD1, SLIRP, PROX1, GGA2, NDUFAB1, NAA20, GDI2, OSBPL2, CTNNBL1, PARP1, STX16, HMGXB4, ACTR8, DDX1, UQCRC2, RAD51C, ASS1, PARD3, HNRNPK, TSC22D2, PINX1, MRS2, NDUFA12, BFAR, SLC38A…	Up-regulated
GU_PDEF_TARGETS_up	0.032113	0.0885658	-0.303475	-1.38625	49	70	DOCK10, VIM, SNAI2, ZEB1, PLCE1, MAPKBP1, VEGFB, COL6A2, CDH2, TNC, TCF4, TGFB1, COL5A1, BMP2, MAP4K4, ITGA3, COL6A1, DKK3, ITGA5	Down-regulated
GU_PDEF_TARGETS_dn	0.0109554	0.0367282	0.48507	1.59755	85	40	KRT18, CDH1, EIF3C, CDH3, KRT8, EIF1AX, KRT33A, PIP4K2C, SMURF1, PI4KB, ITGB4, FZD5, KRT19, HNF1A, KRT6B, PIK3R4, FOXC1, NKX2-5, EIF2B2, KRT34, KRT7	Up-regulated
GUENTHER_GROWTH_SPHERICAL_VS_ADHERENT_up	0.565968	0.718465	-0.268963	-0.927658	1539	22	PTPRZ1, ADGRL3, CRMP1, METRN, HES5, CSPG5, NES, MAP2	Down-regulated
GUENTHER_GROWTH_SPHERICAL_VS_ADHERENT_dn	0.863371	0.927304	0.239354	0.720964	6356	26	CD46, MET, CASP1, PLAUR, NQO1, ITGB1, CTSD, FN1	Up-regulated
GUILLAUMOND_KLF10_TARGETS_up	0.429566	0.599907	0.300175	1.02633	3454	49	YWHAZ, CELSR2, TFAP2C, C20orf27, ASNS, SAA1, FEN1, CD320, RSRP1, ALDH18A1, LCN2, DERL1, NDRG1, SAA2, ITGA4	Up-regulated
GUILLAUMOND_KLF10_TARGETS_dn	0.107575	0.225485	-0.347009	-1.30324	266	30	RCAN1, PAPSS2, VMP1, OIT3, CLEC4F, DERL2, ENPEP, TXNIP, AQP9	Down-regulated
GUO_HEX_TARGETS_up	0.33302	0.506405	0.294916	1.08359	2829	76	SMARCC1, STIL, SRSF7, ENY2, AGFG1, NAA15, SPG21, URM1, RRAGD, MARK2, CMTM6, DHX36, SLC6A6, TES	Up-regulated
GUO_HEX_TARGETS_dn	0.524764	0.687978	0.272852	0.968684	4343	61	PTTG1, DCTPP1, ACP1, MED1, KPNA1, CSNK2A1, GSTK1, POLR2J, PIP4K2C, IFITM3, RNF149, RALY, GSTM1, SLC4A1, TOM1L1, REEP6, ACTB	Up-regulated
GUO_TARGETS_OF_IRS1_AND_IRS2_up	0.0275941	0.0780673	0.373241	1.41255	241	94	HSPH1, CYP51A1, DKC1, CACYBP, MVD, NSDHL, MOGS, SC5D, DHCR7, MSMO1, DNAJA1, RBM39, HMGA1, NUDT4, HSP90AA1, HMGCR, GK, SQLE, GEMIN2, TNFRSF1B, ELK4, TM4SF4, TUBB, TUBB4B, SGK2, ACAT2, FDFT1, FUS, CEBPB, MXI1, CTPS1, PPP1R3B, ACTB, CDIP1, GNS	Up-regulated
GUTIERREZ_CHRONIC_LYMPHOCYTIC_LEUKEMIA_dn	0.0162219	0.0507954	-0.351783	-1.49878	30	51	HIVEP2, ROR1, TTN, CDK14, RAPGEF3, FCMR, FRY, CCDC88A, RXRA, ATXN1, ID3, KCNN4, PBX3	Down-regulated
GUTIERREZ_MULTIPLE_MYELOMA_up	0.000396354	0.00270284	0.619168	1.93849	2	31	VDAC1, PSENEN, YWHAZ, CD47, SRP72, ALG8, YKT6, VDAC2, HNRNPK, DCTD, SSR3, CANX, CNIH1, ATP6V0E1, TAF9, ANKHD1, ARF1	Up-regulated
GYORFFY_DOXORUBICIN_RESISTANCE_up	0.0579334	0.142365	-0.359885	-1.40756	133	35	FAT4, ADAMTS1, GJA5, BACE1, LIMA1, ABCB1, BMP2	Down-regulated
GYORFFY_MITOXANTRONE_RESISTANCE_up	0.581156	0.730149	-0.240943	-0.933709	1356	34	LAMA2, LIN7A, ELAVL4, SYTL2, CYP4F11, MAFF, RASSF8, AMOTL1	Down-regulated
HADDAD_B_LYMPHOCYTE_PROGENITOR_up	0.971375	0.984205	0.174045	0.723443	9399	262	VDAC1, DLEU2, TOP2A, NEIL1, ZNF107, AGFG1, PCNA, E2F5, TMEM243, ZFYVE16, TUBA4A, FHIT, KDM5D, ZMYM5, RCBTB1, FMR1, HMGB2, EZR, ANKRD10, MME, RB1, C6orf62, QRSL1, HS3ST1, PKN2, REXO2, HPS4, CD9, DDX3Y, PSPC1, JUN, TOB1, TIA1, ATR, BARD1, AUTS2, TSPAN14, ARID5B, ZMYM2, N4BP2L2, TTC13, GSDMB, RB1CC1, MAGED4B, CDK13, DNASE2B, LEF1, LDLRAD4, HMCES, ZSCAN16, COBL, FAM171A1, EIF1AY, ADGRA3, CD24P4, SPPL…	Up-regulated
HADDAD_T_LYMPHOCYTE_AND_NK_PROGENITOR_up	0.0820896	0.184141	-0.265919	-1.24096	120	78	CFH, KLF9, PDZD2, CACNB2, SMAD7, BEX1, TAL1, FOXO1, ARMCX1, MEG3, PTPRD, CCDC88A, INPP4B, ID3, LOX, COL5A1, DNAJC6, PLOD2, MPDZ, TNFSF10, TIMP3, FAM117A, HMGA2, PBX1	Down-regulated
HADDAD_T_LYMPHOCYTE_AND_NK_PROGENITOR_dn	0.287123	0.45858	-0.245753	-1.08862	494	61	F13A1, SERPINF1, IL6R, SLC2A5, CTSG, JCHAIN, LGALS1, GPR183, MS4A6A, CEBPD, IL7R, ITGB7, SPON1, CCL3	Down-regulated
HAHTOLA_CTCL_CUTANEOUS_up	0.0667395	0.158433	0.480579	1.42392	488	24	C1QBP, MMP9, S100P, PSMB3, TOP1, ARPC1A, RPL31, G0S2, BARD1	Up-regulated
HAHTOLA_MYCOSIS_FUNGOIDES_up	0.628469	0.76409	0.332242	0.882655	4392	15	MMP9, S100P, TOP1, G0S2, STAT1, TSC22D1	Up-regulated
HAHTOLA_MYCOSIS_FUNGOIDES_dn	0.0905736	0.198908	-0.447111	-1.40901	269	16	IGHA1, CES1, JCHAIN, IKZF1, HLA-DQB1, FLNA	Down-regulated
HAHTOLA_MYCOSIS_FUNGOIDES_CD4_up	0.412996	0.587278	0.296027	1.0385	3393	57	NEU1, RIPK2, ENC1, CXCL3, ARPC1A, ETS2, SULT1A2, NUP214, CXCL8, G0S2, IL1B, PRKAR1A, GM2A, PLAUR, EREG, ACTR2, PFKFB3, CXCL1, NLRP3, KLF6, ZNF185, ATF3, HBEGF, RAB20, TRIB1, MAPK14, CXCL2, VNN1, LILRA4	Up-regulated
HAHTOLA_MYCOSIS_FUNGOIDES_CD4_dn	0.000112499	0.00109167	0.498198	1.91557	0	107	ATIC, CACYBP, ABCE1, DIMT1, SLC7A1, C1QBP, DUT, EIF5B, ZFAND1, FUBP1, OLA1, SRP72, SYNCRIP, GSPT1, PAICS, TMEM123, DDHD2, IMPDH2, ZBED5, COX11, ATG12, EBAG9, EIF1AX, RBM26, PITPNB, KIF2A, UBP1, MPHOSPH9, HNRNPA1, TARDBP, DDX18, RPL31, PRMT2, WWP1, IPO7, HINT1, AVL9, ITGB1BP1, GORASP2, TTC37, MRPL3, NAP1L1, NUCKS1, FAM162A, CCNG1, TRIM33, TRIM28, INPP4A, METTL3, NPIPA1	Up-regulated
HAHTOLA_MYCOSIS_FUNGOIDES_SKIN_up	0.0613687	0.148206	0.316452	1.27481	572	172	STOML2, RPS21, ORC5, ARL3, PDIA4, YTHDF1, SLC5A3, GID8, YWHAZ, PWP1, APEX1, CKLF, GEMIN6, TMEM248, PSMB3, SRRM1, SUPT16H, UBE2V1, ATG12, ARPC1A, TM4SF1, CLEC4A, P4HA1, THYN1, SSR2, ERH, CUTC, ELAVL1, C6orf62, CTSH, PPIH, LRRC15, PRKCI, ITGB3BP, CAPZA2, HNRNPA1, HNRNPU, CASP1, SUZ12, GLUD1, RPN1, SRSF3, PFN1, BARD1, SP3, ITGB1BP1, LAMP1, SREK1, RPL23, SMS, IP6K2, PPIB, MED13, LMCD1, RBBP4, TMEM14A…	Up-regulated
HAHTOLA_MYCOSIS_FUNGOIDES_SKIN_dn	0.0268693	0.0762983	0.504067	1.53001	197	27	C1QBP, TOP2A, SMC3, ITGA6, ANXA4, EIF1AX, BCLAF1, PRKCI, CSNK1A1, DSTN, N4BP1	Up-regulated
HAHTOLA_SEZARY_SYNDROM_up	0.0246294	0.0713912	0.37625	1.42394	215	94	TFDP1, CKS2, PTTG1, EZH2, PSMB2, MMP9, PRC1, S100P, LGALS8, GSPT1, CDK7, ARMT1, PSMB3, TOP1, RAD51C, BAZ1A, PNP, HAT1, NPIPB3, REXO2, FAR2, PGD, UBXN4, BARD1, SMC4, TJP2, NUSAP1, PDXK	Up-regulated
HAHTOLA_SEZARY_SYNDROM_dn	0.329365	0.501971	-0.270311	-1.07466	746	37	KLRB1, NELL2, NCAM1, BST2, KLRF1, CCL5, IL2RB, KLRD1, DUSP2, TXK, NKG7	Down-regulated
HALMOS_CEBPA_TARGETS_up	0.699353	0.817658	-0.211014	-0.882339	1404	47	CKAP4, ADAM3A, RGS4, PTX3, IL1R1, FAS, SPDEF, BMP2, TNFAIP8, RAB32, UGCG	Down-regulated
HALMOS_CEBPA_TARGETS_dn	0.0973075	0.2094	-0.316522	-1.2905	205	42	ROR1, SMAD7, GAS2L1, ID2, UMOD, RHOB, TSC22D3, RGS3, DYRK2, FZD7, SCNN1A, BCAR3, ARL4C	Down-regulated
HAMAI_APOPTOSIS_VIA_TRAIL_dn	0.708954	0.824869	0.220488	0.897346	6705	194	KRT18, SLC39A4, PYCR1, SAC3D1, SLC29A1, FOXD2, SMARCD2, SH3BP1, PLEKHH3, MDK, SCLY, MEPCE, RPP25L, SLC15A3, ASPHD1, TRAC, GRWD1, OTUD7A, SLCO4A1, JUN, SLC27A5, SRD5A3, FZD5, PHLDA2, CISH, FXYD5, TRIM16, PLAUR, SLC16A5, SERPINB1, SLC1A5, MRPL2, SLC5A6, VCP, UTS2R, ISG15, IL24, SERPINH1, TAGLN2, ECHDC3, BLCAP, POLR3E, DEF6, TRAF4, COA7, CEP250, UCHL1, MAPK8IP2, PGAM2, SOX4, KCNG1, POMK, MTA1, VAV3,…	Up-regulated
HAN_JNK_SINGALING_up	0.00985011	0.0338611	-0.421875	-1.63486	22	34	SGK1, IL1RL1, DPT, ANGPTL2, ZEB1, FOXP1, PLEKHO1, TNC, LOX, CCL5	Down-regulated
HAN_JNK_SINGALING_dn	0.0810936	0.182352	-0.333284	-1.33015	174	39	OGN, HAS2, CP, GHR, PLTP, FAS, CD14, ENPP2, COL6A2, IGFBP4, COL6A1, C3, LIFR, SOD3	Down-regulated
HAN_SATB1_TARGETS_up	0.330337	0.50312	0.248538	1.05721	3270	412	CLDN1, DENND1A, DDAH1, TCF20, RAB11FIP1, KLF5, APOC1, CDH1, DDX10, PPME1, RRP15, TFAP2C, SHANK2, PUS7, CDH3, ARL8B, S100P, LGALS8, MSMO1, TUBA4A, INSIG2, MCMBP, NDUFA6, NEDD4, TAP1, NME1, SLPI, ALG13, DNAJB12, AK4, NPC1, MFN1, AP1M2, STXBP6, C4orf19, P4HA1, ZRANB2, FKBP1A, UTP20, PRKAG2, PSMB7, ASPH, OSTM1, HMGCR, CPD, PLXNB2, TSPO, TMEM45B, SLC16A1, YIPF6, CXCL8, CNOT10, CTNNB1, RBCK1, RBX1, MEG…	Up-regulated
HAN_SATB1_TARGETS_dn	0.00833333	0.0296662	-0.227612	-1.30686	0	368	GSN, ADAMTS1, RCAN2, SSBP2, METTL7A, EFEMP1, NPY1R, THSD4, SPTLC3, FAM174B, NR3C2, MATN2, ID4, PTN, CA12, SMARCA1, NRP1, C1QL1, IL6, NR2F2, MPZL2, OSMR, TIGAR, ANKLE2, LIF, DST, FAM20C, RGS4, PAQR8, PXDC1, BST2, HTRA3, ITGA10, PRR16, ATP8A1, FHL1, ITM2A, PELI2, CAPN6, AP1G1, MAST4, CHST11, PDE4B, ZNF226, SPDEF, TMEM101, MTUS1, DNAJC12, COL6A2, CDH2, TNC, CLU, LOX, KCNN4, TCF4, TGFB1, TGFB2, KLHL2…	Down-regulated
HANN_RESISTANCE_TO_BCL2_INHIBITOR_up	0.753674	0.856477	0.253812	0.81377	5794	35	SCD, GPX2, ZNF91, TNFRSF8, TAGLN2, FAM171A1, FSCN1	Up-regulated
HANN_RESISTANCE_TO_BCL2_INHIBITOR_dn	0.128801	0.25777	0.379839	1.28057	1024	46	SDC4, GSTO1, RHPN2, ASS1, HSPA1A, POMC, PRSS3, SNTB1, TRIB3, TESC, CEL, SH3GL2, MGMT	Up-regulated
HANSON_HRAS_SIGNALING_VIA_NFKB_up	0.997669	0.998674	0.148864	0.437073	7276	23	CGREF1, LGALS7, RNF19B, NPPB, OAS1, CRISP3, KLF3, COL18A1	Up-regulated
HARRIS_BRAIN_CANCER_PROGENITORS_up	0.0278696	0.0786053	-0.363475	-1.48193	58	42	PAPSS2, PLPPR4, KCNA4, MGP, SHISA2, COL6A2, SCG5, GJA1, BFSP2, LARP6, COL6A1, DHRS3, SCG3, CAV1, FOXA3, LGALS2, WNT5A, ERVFRD-1, GPR17, ARHGAP29, FOXC2, ARHGAP6	Down-regulated
HARRIS_HYPOXIA_up	0.699965	0.818166	0.236312	0.875714	5990	81	TFRC, TXN, XRCC6, APEX1, SPP1, XRCC5, P4HA1, ALDOA, MIF, STC1, CXCL8, ENO1, JUN, PRPS1, PFKL, CA9, LRP8, PLAUR	Up-regulated
HASLINGER_B_CLL_WITH_11Q23_DELETION_up	0.566955	0.71932	-0.272988	-0.928947	1574	21	GSN, CTSK, DMXL2, CSPG5, ATM, PCSK7, PPP2R1B, GLRA2	Down-regulated
HASLINGER_B_CLL_WITH_13Q14_DELETION_up	0.372336	0.546687	-0.294429	-1.04456	995	24	SSBP2, ID4, ITGB5, RBMS2, EFNA2, DUSP8, BCL7A, KLF4, TPM2, ALOX5	Down-regulated
HASLINGER_B_CLL_WITH_17P13_DELETION_up	0.603822	0.746777	-0.261793	-0.902928	1642	22	ZZEF1, GNAI2, ASMTL	Down-regulated
HASLINGER_B_CLL_WITH_CHROMOSOME_12_TRISOMY_up	0.0795536	0.18016	-0.415163	-1.41275	220	21	ANKLE2, MCRS1, HIP1R, JCHAIN, TIMELESS, DYRK2, M6PR, GLIPR1, GIT2, PMF1, VCL	Down-regulated
HASLINGER_B_CLL_WITH_MUTATED_VH_GENES_up	0.823239	0.898381	0.26553	0.738584	5844	18	TCF7, LDOC1, ZBTB20, WSB2, COBLL1, TLE1, KLK2, MAL, LPCAT1, DMD	Up-regulated
HATADA_METHYLATED_IN_LUNG_CANCER_up	0.00641026	0.0239858	-0.215615	-1.23535	0	350	MEDAG, ANGPTL2, FRZB, GFOD1, HOXD3, GIMAP8, ANK2, ADAMTSL4, ID4, GNA14, CXCL12, SLAMF1, LHPP, TCF21, SYT10, KIT, GRIN2A, NID2, ESR1, TF, COPZ2, MOS, SOX1, CLMP, KCNA4, CA7, IRF4, SLIT2, RCSD1, MT1E, TAGLN, PLTP, LRRC71, TRPV4, NHLH2, RAPGEF4, LXN, PARP6, HOXA7, RNF152, TMEM101, PDE8B, ENPP2, ALX1, OTOP2, GFPT2, LRFN5, NEFM, TNFRSF10C, HTR5A, COL5A1, IQCA1, PIK3R5, FBXO39, AMIGO3, IGF2-AS, HOXD12,…	Down-regulated
HATADA_METHYLATED_IN_LUNG_CANCER_dn	0.83879	0.909834	0.235363	0.750497	6430	34	MELK, FAM222B, RBBP8NL, ZNF572, CFAP65, TRIM29, KIF2B, NGEF, FRMD4A, ZNF556, MAGEB6, NLRP10	Up-regulated
HE_PTEN_TARGETS_up	0.709828	0.824869	0.300483	0.825348	5026	17	CDK6, ZNF274, RB1	Up-regulated
HECKER_IFNB1_TARGETS_up	0.403648	0.577554	0.276525	1.04048	3518	90	PARP12, PNPT1, EPSTI1, PDZK1IP1, MMP9, RPS23, JUP, ITGA2B, CXCL8, DTX3L, HERC5, LY6E, G0S2, SH3BGRL2, EIF2AK2, CHI3L1, ISG15, OASL, CXCL10, LAP3, RTP4, IRF7, TREML1, IFI6, PARP9, GBP1, APOBEC3A, MMP25, DDX58, IFI27, STAT1, OAS1, MX1, IFIT3, GZMB, MGAM	Up-regulated
HEDENFALK_BREAST_CANCER_BRACX_up	0.0230986	0.0677509	0.56762	1.57886	163	18	RPS13, RPS5, ADNP, RPL15, RPP30, RPS4X, UBA52, RPL31	Up-regulated
HEDENFALK_BREAST_CANCER_BRACX_dn	0.00811416	0.0289531	0.599913	1.69169	57	19	DLEU2, METAP2, SYNCRIP, HPS5, SRSF11, UBR5, NAP1L1, FKBP8, PRPF6, EVI5	Up-regulated
HEIDENBLAD_AMPLICON_12P11_12_up	0.917853	0.954072	0.21064	0.680046	7094	36	DNMBP, XCL1, EFCAB1, METTL9, PPP1R7, SAR1A, CBR3, EIF2B2, RPGR, SPA17, RPA1	Up-regulated
HEIDENBLAD_AMPLICON_12P11_12_dn	0.0466501	0.120028	0.513496	1.4819	336	21	MTURN, SYNGR2, PANK1, NOA1, TMEM30B, TNFRSF8, CDK13, SAR1A, ZNF561, FBXL20	Up-regulated
HEIDENBLAD_AMPLICON_8Q24_up	0.0450636	0.116598	0.441912	1.4403	350	38	TEX264, AHSA1, CDC25C, TROAP, SLC16A1, TRAPPC13, UNC13B, MYO6, TMEM38B, C8orf76, GTF2H2, KIF22, IFRD2, NPLOC4, TUBBP5, HLF, BAG5, ALAD, ALKBH1, MAPKAPK3, LONP1, SEC22C, CCSAP	Up-regulated
HEIDENBLAD_AMPLICON_8Q24_dn	0.365247	0.540242	0.326756	1.07132	2864	39	SAP18, COMMD6, RAE1, MDK, NT5DC1, ATF4, GSTK1, SRSF11, SLC9A8, NAB1, NEK6, XRCC1, RABEPK, SEC63, RBM33	Up-regulated
HEIDENBLAD_AMPLIFIED_IN_PANCREATIC_CANCER_up	0.00221266	0.0101241	0.486574	1.69031	17	54	PON2, FBL, MAL2, PTK2, HBS1L, ZNF780A, TBC1D31, BET1, CYC1, EID2, CBLL1, ATF6B, METTL2A, PAK4, SMURF1, DSCC1, FAR2	Up-regulated
HELLEBREKERS_SILENCED_DURING_TUMOR_ANGIOGENESIS_up	0.0957447	0.207005	-0.263377	-1.22343	143	76	ABI3BP, CPE, FBN1, IL6, UCP2, TAGLN, OLFML3, CREB3L1, CCL11, LRP1, CDH2, CLU, FABP4, FUCA1, ITGA3, COL6A1, DKK3, CNN1, FILIP1, IER3	Down-regulated
HELLER_HDAC_TARGETS_up	0.866646	0.928578	0.198157	0.828033	8441	286	SEC23IP, TOP2A, SDC4, MARCKSL1, NEU1, ITGA6, CENPF, CDKL3, CCNF, SCML1, RNF128, DOCK9, BIRC5, ALDH4A1, PMEL, DLGAP5, UBD, IDI1, GLCE, CGREF1, IFT140, JUP, CPD, CHCHD7, GPSM2, NCOA2, MARK2, CCHCR1, CDC20, SGK3, HCFC1R1, ATP13A2, GLYR1, CD9, ADAM15, NRGN, RUNDC3B, TTLL1, DOCK6, DPM3, RABL2B, ENAH, NCAPD2, ARG2, GM2A, FER, GSDMB, ISG15, TUFT1, TSPAN4, ZBTB20, CXCL10, SFXN3, PFN2, ZBBX, MLF1, NCOA3, …	Up-regulated
HELLER_HDAC_TARGETS_dn	0.000102817	0.00109167	0.405474	1.6916	0	280	HSPH1, PLK1, ATIC, SLC7A5, FERMT1, RRS1, HSPE1, DNAJC2, CHAC1, DNAJC15, ABCE1, SORD, SRSF7, MYC, HSPA9, GSTO1, PDIA4, NOP56, GTF3A, HSPD1, DNAJB1, NOP16, RRP15, SFPQ, CUL1, SMYD5, GTSE1, MRTO4, DFFB, RAN, SLC3A2, MYB, S100A11, HDGF, UCK2, PPIF, DESI2, OGT, TIMM44, NUP210, PAK1IP1, EIF5A, NMU, ZMYND8, LARP1, ATF4, SET, HSPA1A, MAPK13, ZBTB38, MYBL2, PSAT1, EIF5, STAG2, UBE2E1, ST6GAL1, CEACAM1, CC…	Up-regulated
HELLER_HDAC_TARGETS_SILENCED_BY_METHYLATION_up	0.0729167	0.169001	-0.194184	-1.13162	6	421	GSN, GAGE1, MAP9, CFH, PRKAR2B, COL14A1, HBA2, CSRP2, SERPINF1, WDR7, MT2A, FBN1, HBA1, ABHD5, PRKCB, DZIP1, DDX43, MT1X, CDK18, EPAS1, TMSB15A, FGFR1, AKAP13, MT1H, TLE4, NTS, FDXR, PEG10, SLC25A44, CDH19, PRPH, EGR2, EGR1, ZNF557, NCAM1, AKAP12, IFIT1, ADARB1, ID2, ID1, MAGEC1, BEX4, MAGEB2, MT1E, NRXN1, RHOB, FHL1, HLA-DRB1, FOS, CLIP2, STAT3, ASMTL, NCAN, SWAP70, PLK2, KIAA0513, FLNB, FBP2, E…	Down-regulated
HELLER_HDAC_TARGETS_SILENCED_BY_METHYLATION_dn	0.00278552	0.0122696	0.342153	1.42429	26	267	HSPH1, SCD, SLC7A5, FERMT1, HSPE1, CHAC1, DNAJC15, SRSF7, MYC, HSPA9, GSTO1, CDKN2A, IFRD1, HSPD1, DNAJB1, SMYD5, ALG8, PDIA6, MRPS15, SLC3A2, MYB, S100A11, HDGF, UCK2, SRM, EPCAM, CYC1, DESI2, OGT, TIMM44, NUP210, KIZ, ZMYND8, ATF4, DNAJB12, HSPA1A, MAPK13, ZBTB38, MYBL2, PSAT1, EIF5, STAG2, UBE2E1, ST6GAL1, CEACAM1, CCND1, SPCS2, ANP32B, BTN3A2, PHACTR2, HSPA1B, FARP1, GAS2, NSMAF, HERC4, CASP1…	Up-regulated
HELLER_SILENCED_BY_METHYLATION_up	0.606061	0.748109	-0.175592	-0.970636	179	271	IGHA1, METTL7A, DOCK10, ADAMDEC1, NCF1, CD200, SERPINF1, CAPN3, FBN1, TNFAIP2, SMARCA1, DDX43, CACNG3, RGS13, IL6R, AKAP12, IFIT1, ADAM19, ST8SIA1, ID1, MAGEC1, RASSF2, NRXN1, HLA-DRB1, APOBEC3F, SLAMF7, CLIP2, NCAN, NR4A3, ENPP2, CLU, XIST, SYNPO, GPR183, VCAM1, SPARC, TRIM22, KYNU, LCP1, HERC6, IL1R2, OLFML2B, IGFBP4, MYO9B, ARNT2, PECAM1, LSP1, FKBP5, AIRE, TRIP6, ARL4C, IER3, SSTR2, L1CAM, MA…	Down-regulated
HELLER_SILENCED_BY_METHYLATION_dn	0.0865483	0.191876	0.335139	1.28188	764	103	HSPH1, UFM1, DDAH1, CHAC1, DNAJC15, MYC, TOX3, EIF4EBP1, SLC5A3, IFRD1, DNAJB1, STK39, SLC3A2, TIMM44, ATF4, HSPA1A, ASNS, PGM3, PSAT1, HSPA13, CEACAM1, HSPA1B, TRIB3, DNAJB9, OSGIN1, CLK1, IDH1, RPS19, CEBPB, CRELD2, SERPINH1	Up-regulated
HENDRICKS_SMARCA4_TARGETS_up	0.60042	0.745344	0.267166	0.920192	4857	51	PERP, EPHB2, PDP1, UBE2H, PLXNB2, CTSH, JUN, KRT15, ADGRG1, ACTN4, CTSB, MMP1	Up-regulated
HENDRICKS_SMARCA4_TARGETS_dn	0.546997	0.703107	0.282281	0.951667	4352	46	MYC, HENMT1, SFTPB, ASNS, MC5R, HEXB, TACSTD2, SPRY2, CLK1, EFNB1, USP24, CXCR6, WDR45, LGALS3, PTP4A1	Up-regulated
HERNANDEZ_ABERRANT_MITOSIS_BY_DOCETACEL_2NM_up	0.191205	0.344904	-0.250732	-1.13792	299	69	SSBP2, SGK1, SERPINF1, EPAS1, PPP2R3A, MAF, PTPRM, ARHGDIB, BNC2, CHST11, NR4A3, IFI16, AGT	Down-regulated
HERNANDEZ_ABERRANT_MITOSIS_BY_DOCETACEL_2NM_dn	0.229327	0.391832	-0.337978	-1.16569	623	22	IL1RL1, PDGFRA, CD69, EGR1, ITM2A, A2M	Down-regulated
HERNANDEZ_ABERRANT_MITOSIS_BY_DOCETACEL_4NM_up	0.00477766	0.0189256	-0.51402	-1.77286	12	22	SGK1, GEM, GAGE12F, MAF, CD53, GHR, TP53INP1, TIMP3, MAGEA6	Down-regulated
HERNANDEZ_MITOTIC_ARREST_BY_DOCETAXEL_1_up	0.00126529	0.00647845	-0.503869	-1.94002	2	33	SGK1, ABI3BP, EMP3, GAGE12F, ITM2A, VEGFC, AGT, DAPK1, CCL21, TIMP3, DUSP1, MAGEA6, LIX1L, WNT5A	Down-regulated
HERNANDEZ_MITOTIC_ARREST_BY_DOCETAXEL_1_dn	0.0088438	0.0312015	0.508417	1.63008	67	35	CDC6, CDK1, UBE2C, CKS1B, CDK2, SLC29A1, FIS1, POLD3, PMEL, FBXO5	Up-regulated
HERNANDEZ_MITOTIC_ARREST_BY_DOCETAXEL_2_up	0.712142	0.826369	0.24431	0.854301	5835	56	CKS2, PLK1, MARCKSL1, CD47, ASNS, CD68, HMGA1, TPR, IL32, ARPC1B, SLC1A5, ETV4, SQSTM1, FOLR1, PHLDA1, MAP7, DCT, MCU	Up-regulated
HERNANDEZ_MITOTIC_ARREST_BY_DOCETAXEL_2_dn	0.465405	0.631935	0.363516	0.998483	3295	17	SCD, CDH1, GALNT3, TGFBR3, NCS1, FXYD3, PPP1R3F	Up-regulated
HESS_TARGETS_OF_HOXA9_AND_MEIS1_up	0.000119261	0.00109167	0.605684	2.18412	0	67	RRS1, NOLC1, TRIP13, C1QBP, DUT, MUC13, HDAC2, METAP2, GAS5, BET1, MYB, NEDD4, PPID, DTYMK, NCL, TFAP4, ASNS, PINX1, MYBL2, WEE1, MCM3, ODC1, HMGCR, DNAJA3, RUVBL2, FABP5, RRM1, PSMG2, GLUD1, UHRF1, MSH2, IMMT, MRPL15, MCM7, NOP58, YBX3, GSTM1, CDC45, IFRD2, TRMT2A, IDE, CTPS1, RUVBL1	Up-regulated
HESS_TARGETS_OF_HOXA9_AND_MEIS1_dn	0.32571	0.497922	-0.225606	-1.05813	469	81	ZFP36, CAMK2D, GCNT2, TF, EGR2, EGR1, ID2, P2RY14, MCL1, CPT1A, FOS, CYBB, MPEG1, MS4A6A, IL1R2, ZFP36L1, SLFN12L, LSP1, DUSP1, AQP9, KLF4	Down-regulated
HILLION_HMGA1_TARGETS_up	0.0327217	0.089975	0.382283	1.41479	279	80	RPL13, RPL21, LIMK1, TFRC, HSP90AB1, HSPD1, AKR1A1, PCNA, NME1, B2M, ATP6V1F, ALDOA, PSMA1, CFL1, MIF, COX5B, RPS17, RPS11, CXCL6, SOD1, GSTM1, RPS12, VCP, HTR6, RPS3A, RPL19, SLC25A5, NRAS, GMFB, TAC1, MAK, IGF2R, HSPB1, GABRR1, GPX3, ARAF	Up-regulated
HILLION_HMGA1B_TARGETS_up	0.00888162	0.0312793	0.417429	1.54486	75	80	RPL13, RPL21, LIMK1, HSP90AB1, AKR1A1, COX7A2, PCNA, PSMB4, NME1, PSMA6, PSMA1, MIF, COX5B, PTMA, RPS11, SOD1, SDC3, GSTM1, RPL10, PLAUR, RPS12, VCP, PNLIPRP2, RPS3A, GRM5, RPL19, SLC25A5, CXCL10, NRAS	Up-regulated
HINATA_NFKB_TARGETS_FIBROBLAST_up	0.2415	0.404871	0.308792	1.14431	2066	81	MRPL33, GSTO1, CCNB1, NPAS2, RAC1, HDGF, CXCL3, ABCC1, CCL20, CXCL8, MAPK9, CXCL6, SOD1, CD9, HGFAC, RPA2, G0S2, MT3, IL1B, GTF2H4, IRF1, CXCL5, TAF15, EGFR, MMP1, ARHGDIA, SELE, CXCL1, MMP14, CCNH, FN1, TBC1D12, KRT7	Up-regulated
HINATA_NFKB_TARGETS_KERATINOCYTE_up	0.365242	0.540242	0.284749	1.06061	3143	84	GSTO1, MMP9, CDH3, RAC1, TAP1, CXCL3, SAA1, CCL20, CXCL8, MAPK9, CXCL11, CXCL6, SOD1, CD9, IL32, MT3, IL1B, IRF1, STAT5A, EGFR, BCL2A1, MMP1, CXCL10, ARHGDIA, ESM1, GBP1, MMP14, CCNH, FN1, KRT7, CYP27B1, XPC, ERCC1	Up-regulated
HINATA_NFKB_TARGETS_KERATINOCYTE_dn	0.819852	0.896239	0.255918	0.751392	5979	23	CLEC16A, CEACAM6, SULT2B1, GPRC5A, PALM, ZNF185, DUSP4, KLK6, ESYT1	Up-regulated
HIRSCH_CELLULAR_TRANSFORMATION_SIGNATURE_up	0.0483434	0.123556	0.308523	1.27364	463	231	DENND1A, PDP1, STAM, LYRM1, STAMBP, MAK16, IFRD1, ZFAND1, AGFG1, VRK2, RIPK2, HAX1, ARPC5L, LGALS8, ANXA3, MFF, TAP1, PCGF1, CXCL3, ANKRD46, NPC1, PNP, TM4SF1, CD68, GATAD1, P4HA1, ETS2, MME, CDCP1, RNF31, IFITM1, CSF3, STC1, ANXA7, DCTN6, HEXB, ZMYM1, LHFPL2, CREM, MMP3, SLCO4A1, CTBS, HERC5, OXR1, TNFRSF21, CA9, UBXN4, EPHA2, ARNTL2, IL1B, YBX3, TJP2, VAMP4, CANT1, PLAUR, RRAGC, SERPINB1, RNF19…	Up-regulated
HIRSCH_CELLULAR_TRANSFORMATION_SIGNATURE_dn	0.638725	0.770544	0.239121	0.910474	5630	98	PTDSS1, MRPL20, CENPF, HACD2, SRSF2, SYNCRIP, NPM1, STARD7, DENR, BCLAF1, UBP1, PCMT1, COMMD8, TOB1, DPM3, SPRY2, SPATS2L, SRRT, DSTN, TCEAL1, TSPAN14, SRSF6, NFIC, NQO1	Up-regulated
HOEBEKE_LYMPHOID_STEM_CELL_up	0.731877	0.840527	0.227998	0.860108	6400	92	DDX21, TMEM41B, TARBP1, SFPQ, CCNL1, RBM39, NPIPB3, TPR, HNRNPA1, TRAF5, ATR, SLC38A1, CHD3, EIF4A1, RAB14, TRIM33, ITGA4, SLC33A1, DPEP2, METTL3, COBL, ADGRE2, TRAF4, PNN, RBBP6, DOCK1, RERE, KDM3A, LRRFIP1, KMT5B	Up-regulated
HOEBEKE_LYMPHOID_STEM_CELL_dn	0.0132427	0.0430787	0.397033	1.48781	114	87	CKS2, BZW2, LSM5, PIP5K1B, C1QBP, RPL35, LAPTM4B, RPL36A, HSPA1A, NUDT4, ETV5, S100A6, TMEM258, CTDSPL, UROD, HMGB3, METTL9, RPS6, IL1B, PTPN11, PCIF1, TJP2, ELF1, CEBPB, COX7A2L, TMEM14A, ACTR2, PRDX2, FHL2, RPS27, CAT, TCF25, SHMT2, GRK5, PMAIP1, HSPB1, RAB38	Up-regulated
HOEGERKORP_CD44_TARGETS_DIRECT_up	0.261084	0.42951	-0.312446	-1.13311	688	26	CAMK2D, IL6, GCNT2, RGS3, CDKL5, SOX5	Down-regulated
HOEGERKORP_CD44_TARGETS_TEMPORAL_dn	0.349877	0.52479	0.369889	1.08602	2551	23	PLK1, TERF1, USP6NL	Up-regulated
HOELZEL_NF1_TARGETS_up	0.00111857	0.00587759	-0.341843	-1.73689	0	132	DCLK1, FAM114A1, MGAT4C, HSPB8, ADGRG2, THSD4, ANK2, RGS13, RBM24, GAP43, NTS, STXBP5, SPARCL1, GRIK2, RAB3C, ACAD11, SYT14, NRXN1, SCG2, CPVL, CAPN6, FAS, ATXN1, NAV1, PLK2, TRAF3IP2, IFI16	Down-regulated
HOELZEL_NF1_TARGETS_dn	0.000943396	0.00515849	-0.374248	-1.86471	0	114	ADAMTS1, FSTL1, GUCY1A2, PDK4, CD200, C7, SERPINF1, PDGFRA, MATN2, ARHGAP28, NTRK3, NR2F2, UBE2E2, ADGRL3, SLITRK6, MFAP2, ST8SIA1, NREP, CP, DCHS1, FBXL7, XIST, HAUS5, EFNA2, PRICKLE1, MIAT, ZNF423, TSPYL5, AASS, ADCY1, SNAP91, HMCN1, PRKD1, HRK, GREM2, SSTR2, FAT3, ADM, LIX1	Down-regulated
HOFFMANN_IMMATURE_TO_MATURE_B_LYMPHOCYTE_up	0.0889713	0.196212	-0.330311	-1.31829	191	39	CR2, ZFPM2, RAB6B, FCGRT, STAT4, RABAC1, PBX3, MS4A6A, CENPA, CSF1, CMAHP, ARL2, GAD1, PACS1, GIMAP4, SELL, APOE, JAK2, CUX2, CDK5R1	Down-regulated
HOFFMANN_IMMATURE_TO_MATURE_B_LYMPHOCYTE_dn	0.0654323	0.155812	0.40515	1.3717	522	47	HBS1L, PPP1R14B, PAX2, SNRPC, BOP1, MYB, UCK2, NEDD4	Up-regulated
HOFFMANN_LARGE_TO_SMALL_PRE_BII_LYMPHOCYTE_up	0.000108719	0.00109167	0.616192	2.4464	0	145	CKS2, ANLN, BRCA2, HJURP, CDKN3, KPNA2, CDCA5, MKI67, E2F8, BUB1, CHAF1B, MELK, AURKA, CDK1, CCNA2, RBL1, TTK, UBE2C, TRIP13, TOP2A, DCTPP1, UBE2T, KIF23, CKS1B, POLA1, MCM10, DBF4, RAD54L, TMPO, PLK4, SLC29A1, CCNB1, CCNB2, MTHFD2, XPO1, PRC1, STMN1, KIF20A, CDC25C, TUBA1B, CKAP5, GSPT1, AZIN1, DLGAP5, NEDD4, RFC3, HMGB2, CIT, PPP1CA, KIF2C, DNA2, NUDC, FEN1, ANP32B, ENO1, HMGB3, UBE2S, HELLS, C…	Up-regulated
HOFFMANN_LARGE_TO_SMALL_PRE_BII_LYMPHOCYTE_dn	0.0159902	0.0501723	-0.320176	-1.43364	25	65	ZG16, HSPB8, ENDOU, TMEM159, EVL, IGSF10, PKIB, FHL1, RAB4B, FBP2, HSD11B2, UBA7, ANKS3, PRM1, LSP1, SLC25A53, SPIN1, IL4R, IER3	Down-regulated
HOFFMANN_PRE_BI_TO_LARGE_PRE_BII_LYMPHOCYTE_up	0.940698	0.966309	0.208462	0.63275	6931	27	KIF23, ENPP1, PI4KB, PTPRA, SOCS1	Up-regulated
HOFFMANN_PRE_BI_TO_LARGE_PRE_BII_LYMPHOCYTE_dn	0.629265	0.764855	-0.200566	-0.929418	958	75	ZG16, FRMD6, PKIB, ITM2C, STAT4, CCL5, SIPA1, SOCS2, EMP1, SEMA7A, GTF2H1, HSPBP1, HEMGN	Down-regulated
HOFFMANN_SMALL_PRE_BII_TO_IMMATURE_B_LYMPHOCYTE_up	0.789903	0.879531	0.226313	0.80876	6586	63	SDC4, TRAPPC5, MYBBP1A, XPO1, GGA2, NEDD4, PSAT1, CTSH, PRPS1, LAT2, DAD1, SERPINB1	Up-regulated
HOFFMANN_SMALL_PRE_BII_TO_IMMATURE_B_LYMPHOCYTE_dn	0.0562743	0.139039	0.440573	1.42238	434	36	EZH2, CDKN3, CCNB1, SLC3A2, XRCC6, NUPR2, GFPT1, SLC16A1, CDC20, EFNB1, RAB36, PTGR1, GZMM, CD151	Up-regulated
HOFMANN_CELL_LYMPHOMA_up	0.0337796	0.0923321	0.429371	1.4537	269	47	SKP2, MYC, CKS1B, E2F5, ATF1, RAB2A, DTYMK, MYBL2, TBP, CCND1, RB1, CXCL8, TFDP2, CDK4, MAPK8, NRAS, TAF5, IL3, CEBPG, COPS5, RBBP5, IL18, NCK1, REL, TFAP2A, MLLT10	Up-regulated
HOFMANN_CELL_LYMPHOMA_dn	0.622212	0.759781	-0.226615	-0.912567	1338	40	PRKAA2, IL6R, IL18R1, TAL1, PRKG1, PPP2R5B	Down-regulated
HOFMANN_MYELODYSPLASTIC_SYNDROM_HIGH_RISK_dn	0.871153	0.931456	0.248111	0.699643	6226	19	STAT2, AZU1, PF4, GPR12, PRG2, HLF, PTCH1, PPBP, PIK3CG	Up-regulated
HOFMANN_MYELODYSPLASTIC_SYNDROM_LOW_RISK_up	0.683585	0.805507	-0.253181	-0.861544	1898	21	DLEC1, PRKCB	Down-regulated
HOFMANN_MYELODYSPLASTIC_SYNDROM_LOW_RISK_dn	0.010912	0.0366312	0.532684	1.63107	80	28	STIP1, TFAP2C, PSMD11, KRT8, PSMD13, UBE2M, HSPA4, CCND1, POU5F1, ANXA2, GPRC5A	Up-regulated
HOFMANN_MYELODYSPLASTIC_SYNDROM_RISK_up	0.258294	0.426286	0.396396	1.16384	1883	23	STIP1, PSMD11, MLF2, CCND1, CD9, GPRC5A	Up-regulated
HOFMANN_MYELODYSPLASTIC_SYNDROM_RISK_dn	0.498346	0.663165	-0.28009	-0.966033	1355	22	DLEC1, CXCL12, PCDHB17P, DYRK2, TP63	Down-regulated
HOLLEMAN_ASPARAGINASE_RESISTANCE_ALL_up	0.459271	0.625821	0.351374	1.00257	3286	20	RPS3, RPL6, RPL7A, RPL11, UBOX5, DPY19L1, CDR2	Up-regulated
HOLLEMAN_ASPARAGINASE_RESISTANCE_ALL_dn	0.095558	0.2069	0.465029	1.36535	696	23	PPIA, SNRPG, HSPA13, CMC4, MRPL15, SUMO2, RAB5C, HNRNPF, DEDD	Up-regulated
HOLLEMAN_ASPARAGINASE_RESISTANCE_B_ALL_up	0.0106456	0.0358979	0.556321	1.64834	77	24	RPS5, FBL, RPL5, RPS3, RPL6, RPL7A, EEF1G, RPL11, EIF3L, RPLP0, RPL4, RPL13A, EEF1B2	Up-regulated
HOLLEMAN_PREDNISOLONE_RESISTANCE_ALL_up	0.0807681	0.181975	0.513307	1.40992	571	17	MAGOH, HNRNPR, SMARCB1, OTUB1, SUMO2, TIMM17A, PCBP1, TAF5	Up-regulated
HOLLEMAN_PREDNISOLONE_RESISTANCE_B_ALL_up	0.025042	0.072178	0.553246	1.56009	178	19	HDGF, HNRNPR, WAC, SMARCB1, OTUB1, UBE2Q1, CS, SUMO2, PCBP1, CTCF	Up-regulated
HOLLEMAN_VINCRISTINE_RESISTANCE_ALL_up	0.167599	0.313219	0.420485	1.2563	1227	25	KPNA2, TRIM24, FKBP1A, SPATA2, ARHGAP32, ZNF512B, PTP4A3, GNS, YRDC, ABHD3	Up-regulated
HOLLEMAN_VINCRISTINE_RESISTANCE_ALL_dn	0.000139899	0.00109516	0.748122	2.10962	0	19	RPS2, HMGB1, RPLP2, LSM7, RPS24, SCNM1, RPS15A, RPL12, RPL23A, ATP13A2, HNRNPU, RPL31, TMSB10, RPL10, RPS12	Up-regulated
HOLLEMAN_VINCRISTINE_RESISTANCE_B_ALL_up	0.715671	0.829036	0.258946	0.839366	5534	37	POM121, TRIM24, SPATA2, CHCHD7, TCFL5, ZNF512B, PSME4, MTF2, PNN, YRDC, ABHD3, DIDO1	Up-regulated
HOLLEMAN_VINCRISTINE_RESISTANCE_B_ALL_dn	0.00100143	0.00537875	0.701369	1.8633	6	15	RPLP2, SCNM1, LSM3, RPS15A, RPL12, RPS11, ATP13A2, HNRNPU, TMSB10, RPS12, S100A13	Up-regulated
HOLLERN_ADENOMYOEPITHELIAL_BREAST_TUMOR_up	0.0123288	0.0405932	-0.540428	-1.73149	35	17	SERPINF1, GABBR1, ACTA2, MYLK, MEF2C, CNN1, ISLR	Down-regulated
HOLLERN_EMT_BREAST_TUMOR_up	0.00113507	0.00594531	-0.461903	-2.36164	0	135	F13A1, MEDAG, ANGPTL2, CFH, FCRL2, LOXL1, LPAR1, VSIG4, PDGFRA, MATN2, EMP3, NFATC1, ZFPM2, VIM, IL18R1, ZEB1, EFEMP2, FCGRT, ANKRD1, NAAA, HTRA3, POFUT2, LRP1, GPR85, CCR2, ADPRH, VEGFC, CCDC102A, AXL, PRRX1, RGS18, PHLDB1, ARHGEF40, CYSLTR1, SEMA7A, PKD1, IGFBP4, CSF1, PCOLCE, STK17B, ITGA5, GNB4, OSR1, MRC2, DCN, SPI1, LSP1, GLIPR1, SEC23A, NRROS, HHEX	Down-regulated
HOLLERN_EMT_BREAST_TUMOR_dn	0.000111247	0.00109167	0.505567	1.96623	0	119	CLDN1, OCLN, APOC1, MAL2, BCL11A, RHPN2, CDH1, FAM83H, CELSR2, DSG2, SORT1, TFAP2C, NIPAL2, CDH3, ERBB3, MARVELD2, IL17RE, PPIF, EPCAM, ELOVL7, EPB41L5, LSR, ESRP1, AP1M2, FZD6, PRSS8, JUP, EHF, CDCP1, CEACAM1, STARD10, GRHL1, RAB25, POF1B, CLDN4, TMPRSS2, RNF43, TMEM30B, ATP6V1C2, KRT15, TMPRSS13, IRF6, C1orf56, GRHL2, CLIC3, BLMH, CRB3, CCDC120, IDE, MYO5B, CD24, RIPK4, KDF1, EFNA3, EVPL, FXYD3…	Up-regulated
HOLLERN_MICROACINAR_BREAST_TUMOR_up	0.29163	0.464167	0.335587	1.12181	2309	44	TPD52L1, LMTK2, UPB1, MANSC1, LIG3, CPD, CLDN2, TESC, CA6, CHN2, RASSF3, HDAC11	Up-regulated
HOLLERN_MICROACINAR_BREAST_TUMOR_dn	0.184263	0.335773	-0.404453	-1.24325	554	15	TNFAIP2, TNC, SYNPO, ACKR3, TUBB2B, PTPRS	Down-regulated
HOLLERN_PAPILLARY_BREAST_TUMOR_up	0.766096	0.863515	-0.247031	-0.791467	2236	17	PLCE1, CSN1S1	Down-regulated
HOLLERN_SOLID_NODULAR_BREAST_TUMOR_dn	0.000402901	0.00272328	-0.561057	-2.10713	0	30	NID1, RBMS3, HAS2, GLI3, TMEM159, ANKRD44, ENPP2, LRRC8C, BMP2, SPARC, GJA1, IL1R2, IGFBP4, PTPRS, VASH2	Down-regulated
HOLLERN_SQUAMOUS_BREAST_TUMOR_up	0.53985	0.69821	-0.184835	-0.9821	358	172	ENDOU, MT1X, ATP12A, GLTP, KRT17, EGR2, SLC46A2, DST, ID1, DEFB1, ADTRP, RPTN, PSORS1C2, CWH43, KRTAP4-1, ID3, IVL, FGFBP1, PINLYP, GSDMA, BMP2, SNCAIP, KRT10, CLIP4, GJA1, PARD6G, HYAL1, MSX2, KRT1, KRT6A, TP63, KRT31, ADH7, GNAI1	Down-regulated
HOLLMANN_APOPTOSIS_VIA_CD40_up	0.000844238	0.00470463	0.381841	1.55605	7	196	HSPH1, CDKN3, HMGB1, SYPL1, DUT, MAK16, HBS1L, LGALSL, E2F1, RPS4Y1, TUBA1B, ALDH4A1, MRPS33, GTF2IRD1, PARP1, TCEA1, PFDN2, MRPL34, FANCA, KDM5D, LSR, XRCC5, SDHB, CNOT7, ASH2L, SNU13, CPNE3, CYB5R1, ZNF93, AGPAT5, SNX10, ETS2, PAK2, MRPS22, PCMT1, TUBA1C, PPP6R1, HMGB3, SRP54, CREM, SLCO4A1, HGSNAT, LSM4, SERINC5, DDX3Y, PXMP4, TMEM147, COPS2, NRGN, ARPC1B, ATP6V1B2, FNTA, CAB39L, CAP1, COLGALT…	Up-regulated
HOLLMANN_APOPTOSIS_VIA_CD40_dn	0.00124456	0.0064191	0.357384	1.48025	11	245	MIPEP, CERS6, SEC23IP, RPL8, PON2, BZW2, PARP12, GTF3C3, SLC39A4, GSTO1, STAMBP, TIMM9, MRPL57, USP7, MTRF1, MGST2, OXSR1, LRIF1, PCBD1, S100A11, SUB1, FOCAD, FANCF, C8orf33, GNPDA1, ANKRD10, PPP1CA, NEK3, HOXA10, THYN1, CANX, ZNF274, IFITM1, UBE2L6, MSRB2, TSPO, KLHL9, TRAM1, GTF2H5, TRIM13, PSMB9, CPOX, CTNNA1, TFG, CD9, VPS16, CASP1, RPN1, VWA8, HSBP1, PCTP, TES, ANXA2, HOMER1, ANXA2P2, THUMPD…	Up-regulated
HONMA_DOCETAXEL_RESISTANCE_up	0.000398936	0.00270841	0.634459	1.96972	2	30	UFM1, HACD2, PPP1R14B, PDCD5, TUBA1B, SLC25A3, RPL38, MAD2L2, CFL1, RPN2, S100A10, ENO1, CTNNB1, CALR, ANAPC7, TUBB, MRPL17, HSPA5, DYNLL1, GAPDH, GSTP1, IFI6	Up-regulated
HONRADO_BREAST_CANCER_BRCA1_VS_BRCA2_up	0.00541233	0.0209529	0.641794	1.73229	37	16	SKP2, CCNA2, TOP2A, CCNB1, BIRC5, KRT8, CCND1, RAD50, EGFR, EREG	Up-regulated
HOOI_ST7_TARGETS_up	0.283778	0.454847	0.295908	1.11165	2469	89	SUGT1, BAIAP2L1, PMPCB, FAM200A, RGMB, SMKR1, ANXA3, RFWD3, PAXBP1, ASNS, KLHDC10, PI3, MYO6, IL32, LY6E, NLN, STRIP2, MEST, PDAP1, RCL1, MRPS25, TNPO3, PRR5, ARHGAP18, ZNF616, METTL21A	Up-regulated
HOOI_ST7_TARGETS_dn	0.119004	0.242717	-0.237255	-1.17279	128	111	TTN, NBEAP1, MCOLN3, VIM, ANG, TPM4, ID2, SLC14A1, VWA5A, CREB3L1, NOG, OBSL1, GXYLT2, WNK3, KLC1, CSGALNACT1, SPARC, TP53INP1, TET1, ETFA	Down-regulated
HOQUE_METHYLATED_IN_CANCER_up	0.404044	0.577762	0.299075	1.04254	3296	55	BRCA1, APOC1, CDKN2A, CDH1, GH2, FANCF, FHIT, CDX2, FOXN2, MGMT, SOCS1, GSTP1, RASSF1, SFN	Up-regulated
HORIUCHI_WTAP_TARGETS_up	0.129278	0.258275	-0.196629	-1.09751	33	288	HIVEP2, PER3, CFH, CD200, GVINP1, EMCN, FBN1, CPQ, GABBR1, ABHD5, PDZD2, ZNF667-AS1, ACTA2, GCNT2, COLEC12, PTGS1, OSMR, BEX1, CD109, NR3C1, GLIDR, RFTN1, ZBTB8A, GLIS3, ACVR2B, ZEB2, COX7A1, PTPRM, IL1R1, PLPP3, GDF3, TAGLN, OLFML3, ANKRD12, ITM2A, PMP22	Down-regulated
HORIUCHI_WTAP_TARGETS_dn	0.000102428	0.00109167	0.578897	2.42542	0	301	TMEM97, RPL13, CKS2, TPX2, ANLN, PLK1, PTTG1, HJURP, CDKN3, PRR11, SKA3, MKI67, GLO1, UBXN2A, BUB1, MELK, AURKA, CDK1, CCNA2, RAD51AP1, FANCD2, TTK, UBE2C, TRIP13, CEP55, CKAP2, C1QBP, TOP2A, EBPL, CCNC, KIF23, C1D, FBL, CKS1B, ENY2, CENPM, CCT7, CENPN, POLA1, FAM83D, SC5D, SLC5A3, SPC25, TMPO, CCNB1, CCNB2, TMEM33, CDC25B, LBR, DHFR, POLR3G, CENPW, PLP2, GTSE1, PRC1, BTBD6, CKAP2L, MRPL48, SNRPA…	Up-regulated
HORTON_SREBF_TARGETS_up	0.00395796	0.0161512	0.583059	1.72756	28	24	CYP51A1, SC5D, INSIG1, ACLY, STARD4, IDI1, SQLE, HMGCS1, FDFT1, RDH11, FDPS, HSD17B7, ACSS2, PMVK, ACACA, AACS	Up-regulated
HOSHIDA_LIVER_CANCER_LATE_RECURRENCE_up	0.18317	0.334178	0.340478	1.20581	1514	60	GPX2, SLC12A2, CDH1, UBE2A, HDAC2, PCNA, GABRE, AOAH, UBD, HSPA1B, PSMB9, MSH2, TES, CAP1, RALY	Up-regulated
HOSHIDA_LIVER_CANCER_LATE_RECURRENCE_dn	0.747287	0.851848	0.232601	0.838766	6265	67	FDX1, SC5D, PSMB3, GARNL3, MME, CDH17, ENPP1, DACH1, LHCGR, TJP2, TMEM11, CHRNA5, ART1, USP14, COBLL1, ST3GAL6, PITX1, U2AF2, USF2, RHAG, DHRS2, PRKAR1B, ALAD	Up-regulated
HOSHIDA_LIVER_CANCER_SUBCLASS_S1_up	0.493225	0.657681	0.242591	0.999803	4731	225	SLC7A5, ZNF384, KLF5, DUT, ATP6V0B, CDC25B, MTHFD2, SLBP, CD47, PLP2, CAPZA1, PAK1, TUBA4A, POLD3, PPP4C, S100A11, LDHB, OAZ1, CBFB, ANXA4, PNP, SLC39A6, ATP6V1F, SRI, ALDOA, S100A10, MYCBP2, AP2S1, LHFPL2, CDC20, NSMAF, RPA2, ADAM15, TRAF5, ARPC1B, ATP6V1B2, PFN1, TNFRSF1B, PRMT5, STX3, COL11A1, HLA-DQA2, PLAUR, DGKZ, SLC1A5, RALGDS, EFNB1, IRF1, S100A13	Up-regulated
HOSHIDA_LIVER_CANCER_SUBCLASS_S2_up	0.000111882	0.00109167	0.602672	2.33034	0	113	CSE1L, CD46, SMARCC1, RPS5, TIAL1, FBL, EIF4A2, PRDX3, SNRPE, ACP1, DEK, CUL4A, TARBP1, LBR, CSNK2A2, ERBB3, SSB, SEPHS1, RPL27, RPS24, RBM39, DDX1, HNRNPA2B1, RPS25, CDK6, AHCY, IDI1, CSNK2A1, NUP153, PPARG, POFUT1, PLXNB1, HMGCR, TM9SF4, CPD, RRP1B, BCLAF1, ENPP1, UBE2K, CTNNB1, TPR, SUMO1, RPL24, HELZ, HNRNPU, DDX18, SUZ12, GLUD1, TIA1, RPL31, SNTB1	Up-regulated
HOSHIDA_LIVER_CANCER_SUBCLASS_S3_up	0.0116618	0.0386738	-0.221176	-1.2181	3	258	CPA3, VSIG2, CFH, CA2, PAPSS2, PDK4, SLCO2A1, MT2A, PLCG2, EPAS1, IL6R, BAAT, CES1, CYP2C9, GPT, MAOB, SERPINA3, ACADS, SPARCL1, IGF1, DNASE1L3, IFIT1, AGXT, CNGA1, PCCB, KCNJ8, FOXO1, CPA4, CP, SLC23A2, PLA2G2A, GHR, RHOB, SPAM1, ARG1, APCS, SLC35D1, CD14, MYLK, C1R, ASCL1, SLC10A1, TDO2, PGM1, GCH1, INSR, SELENBP1, NFIB, HGD, ICAM3, ASGR2, C4BPA	Down-regulated
HOSHIDA_LIVER_CANCER_SURVIVAL_up	0.363926	0.538981	-0.230224	-1.04485	570	69	CPA3, SLIT3, FBN1, PRKG2, AKAP13, NTS, AEBP1, CD48, ELOVL2, IQGAP1, TCF4, HMG20B, CCL21, LPP, SERPINB8, CXCR4, IER3, EPM2AIP1, FILIP1L	Down-regulated
HOSHIDA_LIVER_CANCER_SURVIVAL_dn	0.0184311	0.0565212	0.374765	1.44254	163	108	TMEM97, HSPE1, RFC2, SC5D, NARS2, EMD, AKR1A1, SRSF2, PSMB3, ANKRD46, ATP2C1, IMPA1, SNX10, HMGCR, POLRMT, BAIAP2, CYP2B6, VPS41, XPA, CPOX, RRM1, CTBS, CCT8, SDHC, HMGCL, ERCC5, DAD1, TRAF6, GSTM1, ACSM3, GRM5, C8B, TIMM8A, CYB5A, ART1, USP14, PLCB3, TAF1C	Up-regulated
HOUSTIS_ROS_up	0.160931	0.303967	0.387025	1.2495	1243	36	GPX2, SDC4, GLRX2, PRDX3, TXN, PRDX1, SCAF4, SOD1, GPX1, FTH1, PRDX2, CAT, TXNRD1, PRDX6, GPX3, TXN2, PRDX4, GPX4, GSR, HPX	Up-regulated
HOWLIN_CITED1_TARGETS_1_up	0.949036	0.970022	-0.174444	-0.67601	2215	34	IL6R, NR2F2, XIST, IL1R2, DDX6	Down-regulated
HOWLIN_CITED1_TARGETS_1_dn	0.119731	0.243859	0.401299	1.3008	925	37	RAD51AP1, TFRC, SC5D, NABP1, ASPH, IDO1, TMEM30B, ABCB7, CAP1	Up-regulated
HOWLIN_CITED1_TARGETS_2_up	0.0513979	0.129849	0.540741	1.48527	363	17	LACTB2, TRIM27, MYB, KIF18A	Up-regulated
HOWLIN_CITED1_TARGETS_2_dn	0.585709	0.733701	-0.286049	-0.901441	1745	16	MPZL2, CHRDL1, PHGDH	Down-regulated
HOWLIN_PUBERTAL_MAMMARY_GLAND_up	0.00799508	0.0285725	-0.334361	-1.49715	12	65	ANGPTL2, CFH, PDGFRA, PTN, CXCL12, NPY6R, CPXM1, DBP, S100A9, EVI2A, IFI16, APBB1IP, KRT10	Down-regulated
HSIAO_HOUSEKEEPING_GENES_up	0.000101225	0.00109167	0.558869	2.36914	0	371	RPL13, ATIC, RPL21, RPS2, RPL8, EIF3E, PSMB2, NDUFA4, PTDSS1, RPS21, HMGB1, UBE2C, RPS5, RPLP2, C1QBP, HSP90AB1, RPL7, BUD31, FBL, GSTO1, SNRPD2, EIF4A2, RPL35, ARL6IP1, HSPD1, RPLP1, YWHAZ, ESD, RPL10A, EIF3C, NCSTN, TXN, XPO1, COX7A2, RPL14, PLP2, RPL39, NONO, RPS16, EIF4H, MGST2, RPL18, STMN1, PPIA, CAPZA1, RPS18, RPSA, CETN2, SSB, PSMB4, RAC1, PRDX1, CCT4, RPS7, SLC25A3, PGAM1, YWHAB, RER1, R…	Up-regulated
HSIAO_LIVER_SPECIFIC_GENES_up	0.607735	0.749773	-0.178559	-0.968656	219	241	ADH1B, CFH, UGT2B15, SERPINF1, TAT, PZP, BAAT, TF, ANG, CES1, CYP2C9, GPT, SERPINA3, AGXT, PCCB, CP, UGT2B4, GHR, CPN2, ARG1, FST, APCS, CDH2, FGA, C1R, ITIH2, SLC10A1, TDO2, AGT, ADH1A, GCH1, KYNU, C8G, CFHR4, HGD, ASGR2, C4BPA, PLOD2, GSTA1, ITIH4, AADAC, CYP2C18, OTC, C3, HPN, UGT2B7, CXCR2, HMGCS2, SERPINA1, CRADD, FABP1, SPP2, PON3, F10, FURIN, IGFBP1, GSTA2, ASL, C1S, MBL2	Down-regulated
HU_ANGIOGENESIS_up	0.42428	0.59757	0.356309	1.02828	3064	21	NMD3, PIK3R1, ITGB4, STXBP1, NRGN	Up-regulated
HU_ANGIOGENESIS_dn	0.000393133	0.00269285	0.596749	1.89168	2	33	CKS2, RPA3, GMPS, NDUFB6, EIF3M, HNRNPA2B1, SET, MDH1, GSC2, DHX15, POLR2K, SMYD2, ANXA7, SOD1, PSMB1, GTF2A2, PFN2, PDS5A, GPI, ATP6V1G1, ZNF217, MCM6, GCDH	Up-regulated
HU_GENOTOXIC_DAMAGE_24HR_up	0.0011825	0.00615033	0.568611	1.79247	8	32	SLC7A5, EIF4EBP1, RPL10A, MTHFD2, TOX4, DNAJA1, IMP3, ATF4, NABP1, BANF1, HMGB3, CASP1, ALDH18A1, CD7, ISG15, WDR83OS	Up-regulated
HU_GENOTOXIC_DAMAGE_4HR_up	0.000131044	0.00109167	0.680524	2.15724	0	33	CKS2, ANLN, PTTG1, KPNA2, BUB1, AURKA, ORC5, MTHFD2, CUL1, PRC1, SYNCRIP, CDC25C, MAPRE1, TCF19	Up-regulated
HU_GENOTOXIN_ACTION_DIRECT_VS_INDIRECT_24HR_up	0.00087184	0.00481184	0.519861	1.7691	6	48	TOMM34, HSPB11, PSMA2, TOP2A, GLRX3, SYNCRIP, NPM1, APEX1, NCL, CCT3, LYPLA2, UBE2E1, RB1, NUS1, PTMA, DNAJB6, INCENP, GSTM1, RIC8A, HNRNPUL2	Up-regulated
HU_GENOTOXIN_ACTION_DIRECT_VS_INDIRECT_4HR_up	0.0750113	0.172969	-0.341419	-1.35892	165	38	SSBP2, LOXL1, NRP1, SOX1, SNAI2, ZEB1, MCL1, CD28	Down-regulated
HUANG_DASATINIB_RESISTANCE_dn	0.383612	0.55808	0.290538	1.05407	3234	69	CERS6, CRNKL1, EPB41L5, STARD10, JPH1, METTL9, MEGF9, YME1L1, TRIM13, ICA1, TOB1, SLC38A1, CCDC58, DNPH1, ISOC1, ABHD11, SBK1, TRPS1, ASCL2, ACSL3, TPD52, CLDN3	Up-regulated
HUANG_DASATINIB_SENSITIVITY_up	0.201463	0.357354	-0.243608	-1.13159	302	76	FSTL1, LAYN, OSMR, F3, SNAI2, LIMA1, IFI16, PGM1, COL5A1, DPYD, MSN, PCDH7, SAMD9L, LARP6, ITGA5, KCTD12, CALD1, PPP1R18, CAV1, CAV2, TGFBR2, POPDC3, CCDC50	Down-regulated
HUANG_FOXA2_TARGETS_up	0.825082	0.899554	0.228813	0.771409	6565	46	CHAC1, TOX3, ASNS, PSAT1, HLCS, ENPP1, HOMER1, CADPS2, NR1D1, SPAG1	Up-regulated
HUANG_FOXA2_TARGETS_dn	0.827684	0.901309	0.235878	0.761524	6397	36	CDH3, SPP1, ST6GAL1, CEACAM1, ITGB4, PLAUR, GALNT6, CTSB, CLIC3, S100A4, TGFBI, CRIP2, LEPR, KRT81, CXCL2, TGM2	Up-regulated
HUANG_GATA2_TARGETS_up	0.347447	0.522305	-0.201583	-1.04445	278	147	CPA3, GSN, DGKG, FAM107B, CYTIP, GPR171, EMP3, IL17RA, KIT, GCNT2, TOX, P2RY14, SLC12A6, PLAC8, TPCN1, EVI2A, LGALS1, AKR1B10, KCNN4, TESPA1, TP53INP1, TNFAIP8, CCPG1, IRAK3, GABARAPL1, AFF1, CD93, IQGAP2, KCTD12, TXNIP, SPI1	Down-regulated
HUANG_GATA2_TARGETS_dn	0.0203961	0.0615223	0.407999	1.48023	171	69	DIAPH3, SKP2, AURKA, CHAC1, TFRC, MTHFD2, RABGEF1, GPAT4, PLAGL2, ASNS, IPO11, PIGT, DCTD, RRP1B, NT5C3A, NOMO1, TMEM132A, GATA2, EXOC3L4, GOLT1B, NUP107, TCOF1, PF4, CTPS1, ACTB, PHLDA1, PFAS, SIAH1, SHMT2, FDPS, EIF3D, ST3GAL6, IPPK, FAM3C, ZFPM1	Up-regulated
HUI_MAPK14_TARGETS_up	0.0595655	0.145223	-0.439202	-1.45697	169	19	SFRP1, JUND, FHL1, DUSP8, ITGB7, GRAP2, GADD45A, LRRC39, MAP2K6	Down-regulated
HUMMEL_BURKITTS_LYMPHOMA_up	0.27027	0.439595	0.348915	1.14398	2119	39	CSE1L, DLEU1, RFC3, RCBTB1, MME, TCP1, RAP1GAP2, TFDP2, SERINC5, PRDM10, SUGCT, NASP, LEF1	Up-regulated
HUMMEL_BURKITTS_LYMPHOMA_dn	0.155378	0.29726	-0.4177	-1.28397	467	15	MDFIC, FNBP1, ARHGAP25, STAT3	Down-regulated
HUMMERICH_BENIGN_SKIN_TUMOR_up	0.408204	0.582263	0.387751	1.0466	2865	16	GSTO1, SLPI, FABP5, KLK9, DROSHA	Up-regulated
HUMMERICH_BENIGN_SKIN_TUMOR_dn	0.357443	0.534018	0.383983	1.08279	2554	19	PLXNB2, ALB, MYH1, TNNT3, MYLPF, ATP2A1, S100A3, PCDH12, ACTN3	Up-regulated
HUMMERICH_MALIGNANT_SKIN_TUMOR_up	0.379738	0.554437	-0.32144	-1.05053	1101	18	HBA2, PLET1, S100A9, ECM1, GSTA1, COL1A2, RHOG, LTF	Down-regulated
HUMMERICH_MALIGNANT_SKIN_TUMOR_dn	0.694704	0.813911	0.294115	0.83919	4971	20	SNX7, PLXNB2, SCAND1, ALB, TNNT3, MYLPF, ATP2A1, PCDH12	Up-regulated
HUMMERICH_SKIN_CANCER_PROGRESSION_up	0.162022	0.30515	0.322607	1.20891	1406	87	PERP, MYC, CUL4A, MMP9, CCNF, EPCAM, APOC2, MIF, HSPA8, BCL10, S100A6, ENO1, IFITM3, LGALS7, ITGB4, UBA3, CASP1, TACSTD2, NCF2, KRT19, LCN2, SERPINB1, HSPA5, SAA2, SOCS1, BLMH, IDE, THOP1	Up-regulated
HUMMERICH_SKIN_CANCER_PROGRESSION_dn	0.281619	0.452547	-0.222044	-1.07607	333	98	PYGM, C1QA, PDGFRA, EYA2, MFAP4, RECQL5, PTPRF, DST, AEBP1, ID2, FHL1, MYBPH, CHST11, LGALS1, COL6A2	Down-regulated
HUNSBERGER_EXERCISE_REGULATED_GENES_up	0.431101	0.601273	0.328111	1.02725	3262	31	UBE2B, VGF, ODC1, CSF3, PRKCI, ELK1, GIT1, LDHA, ADGRL1, MAPK1, MAP2K2, GABRR1	Up-regulated
HUPER_BREAST_BASAL_VS_LUMINAL_up	0.727968	0.838338	0.244606	0.846394	5897	53	GPX2, ITGA6, S100P, SLPI, SLC39A6, P3H2, FABP5, PI3, LGALS7, IL1B, NDRG1, TRIM29, SFN, SPRR1A	Up-regulated
HUPER_BREAST_BASAL_VS_LUMINAL_dn	0.20903	0.367238	0.337958	1.18177	1712	56	KRT18, DDAH1, SCCPDH, KRT8, TM4SF1, HMGA1, CLDN4, PSMB9, MYO6, IL32, KRT15, MYO5C, GPRC5A, KRT19, LCN2, IDH2, HLA-G, ALCAM, IGFBP3	Up-regulated
HUTTMANN_B_CLL_POOR_SURVIVAL_up	0.975874	0.987216	0.172468	0.718257	9464	270	PON2, EIF4EBP1, NEU1, PAK1, DCAF15, MYB, ATP6V0C, S100A11, OGT, IL17RB, NEDD4, CABIN1, ST6GALNAC4, SFTPB, PNP, CYP2A6, NAGLU, TKT, PRSS3, CEACAM1, RAPGEF1, MSRB2, CNKSR1, ATL2, TSPO, TYROBP, ATP11A, ZNF702P, HS3ST1, MGAT4B, CD9, DIAPH1, PRRC2A, LDB1, FCER1G, TNFRSF1B, MYO5C, NCF2, KRTAP4-7, LDOC1, TPST2, HLA-G, GM2A, ITGAL, TGFBR3, MEST, S100A13, ITGA4, LDLRAD4, ARHGDIA, RYR3, ARHGAP44, S100A11P1…	Up-regulated
HUTTMANN_B_CLL_POOR_SURVIVAL_dn	0.47815	0.643357	0.282749	0.996611	3938	59	ADK, PIP5K1B, PTK2, USP6NL, KIZ, TRAC, HELLS, MGAT5, TCF7, CASP1, SYNJ2, ADAM10, ALCAM, ZBTB20, UTS2, PLAG1, METTL8	Up-regulated
HWANG_PROSTATE_CANCER_MARKERS_up	0.0705914	0.165108	0.457338	1.40036	523	28	TXN, RAN, PHB, EZR, MIF, CTNNB1, AZGP1, PARK7, CALR, NDRG1, LGALS3, KPNB1, WNT3, PTEN	Up-regulated
ICHIBA_GRAFT_VERSUS_HOST_DISEASE_35D_up	0.604105	0.746777	0.238505	0.943514	5532	141	PLK1, SCD, MMP12, DCLRE1A, BIRC5, SPTLC2, PDK3, S100A11, CLIC1, TAP1, UBD, SLPI, NABP1, CD68, SNX10, S100A6, TYROBP, CXCL9, PSMB9, CASP1, TMSB10, CD7, COLGALT1, STX3, SNX12, TSPAN4, BCL2A1, GBP4, SULT2A1, CTPS1, LGMN, NCOA3, LILRB4, SCMH1, SMOC2, LGALS3, S100A4, SHISA5, GDF5, PROM1, CYP26A1	Up-regulated
ICHIBA_GRAFT_VERSUS_HOST_DISEASE_35D_dn	0.58	0.730036	-0.217997	-0.939948	1101	53	RETSAT, CES1, ELOVL2, GAS1, AVPR1A, VEGFB, RPAP1, PRLR, CYP7B1, INMT, ADCY9	Down-regulated
ICHIBA_GRAFT_VERSUS_HOST_DISEASE_D7_up	0.876754	0.935489	0.200638	0.77464	7810	112	KRT18, MAK16, CLIC1, TAP1, PSME2, C8orf33, SNX10, EOGT, TYROBP, CXCL9, ATP11A, SAAL1, PSMB9, TMSB10, PSMB10, IRF1, RNF19B, ISG15, GBP7, N4BP1, BCL2A1, SOCS1, GBP4, CXCL10, LILRB4, EIF1AY, IRF7, SHISA5, AKAP9, IFI27, STAT1, NEK9	Up-regulated
ICHIBA_GRAFT_VERSUS_HOST_DISEASE_D7_dn	0.755674	0.857374	-0.206065	-0.852401	1564	45	IGHA2, PAPSS2, HBD, GHR, ELOVL2, PRLR, NXN, C8G, SLC26A1, HMGCS2, LIFR, CYP4A22, CELA1, NAT8, PKLR	Down-regulated
IGARASHI_ATF4_TARGETS_dn	0.00331466	0.0140115	0.426863	1.61217	28	93	SLC7A5, GPX2, HSPB11, SKP2, DSG2, SLC3A2, S100P, DDHD2, ATF4, KPNA1, HSPA1A, ASNS, FRK, PSAT1, ARPC1A, VPS36, FZD6, ASPH, OSTM1, SLC35B4, POF1B, PGM2L1, HSPA1B, CEACAM6, SGK3, CBX1, CDK19, TOMM20, DDC	Up-regulated
IGLESIAS_E2F_TARGETS_up	0.0206311	0.0621091	-0.253571	-1.30645	16	143	OGN, GSN, ANGPTL2, HBA2, C1QA, SERPINF1, ACTA2, NID2, CES1, MFAP2, EVL, CD53, GNAI2, COL15A1, RHOB, ITM2A, PMP22, SCG2, LGALS1, ENPP2, COL6A2, LAPTM5, SPARC, GJA1, EMP1, LCP1, NFIB, IGFBP4, ACADL, CYFIP1, SS18, SLC25A4, C1QB, CNN3, DCN, C3, COL1A2, NPTN	Down-regulated
IIZUKA_LIVER_CANCER_PROGRESSION_G1_G2_dn	0.000955371	0.00519807	0.627415	1.85899	6	24	CCT6A, SFPQ, ADNP, TSC22D2, RPN1, ZNF91, SP3, GORASP2, PRPF40A, PSME4, PPIB, VEZF1, ACTB, TPD52L2, SIAH1, FDPS, GOLGA4, UBQLN2	Up-regulated
IIZUKA_LIVER_CANCER_PROGRESSION_G2_G3_up	0.734483	0.842679	0.270076	0.813503	5407	26	APOC1, SCML2, KDELR2, TMED2, SDHD, TIMM17A, COBLL1, PRDX6, PCSK6, BNIP3, PGRMC1, ACSL1	Up-regulated
IIZUKA_LIVER_CANCER_PROGRESSION_L0_L1_up	0.990272	0.995028	0.182311	0.48434	6921	15	SULT2B1, ZFPL1, RMND5A, FN1, DMD, ZNF337, RGPD8, PTPN18, S100A2, CNBP	Up-regulated
IIZUKA_LIVER_CANCER_PROGRESSION_L0_L1_dn	0.666429	0.794063	0.317641	0.857359	4678	16	VDAC3, TSPO, RPS19, ISCU, TMX1, SSR4, HLA-F, RHOA, HLA-A, COX4I1	Up-regulated
IIZUKA_LIVER_CANCER_PROGRESSION_L1_G1_up	0.0463972	0.119511	-0.446569	-1.50434	131	20	MT1H, MAF, ID2, MT1E, FOS, FERMT2, C6orf120, C1R, IGFBP4	Down-regulated
IKEDA_MIR1_TARGETS_up	0.424831	0.597646	0.295882	1.02786	3455	54	YWHAZ, E2F5, SYNCRIP, HNRNPR, NCL, HNRNPK, NFAT5, UBE2H, ARHGAP21, CREM, GCLC, VAMP4, YWHAQ, TBC1D15, RSBN1, SEC63, PDCD10, RRBP1	Up-regulated
IKEDA_MIR133_TARGETS_up	0.177933	0.327087	0.368767	1.22175	1402	42	NCOA6, PTPRO, NFAT5, ASPH, PITPNB, ELAVL1, SACM1L, DNAJB6, SEC61B, SLC6A6, HS2ST1, YWHAQ, PPP2CA, NDRG1, RAP2C, AKAP9, CTBP2	Up-regulated
IKEDA_MIR30_TARGETS_up	0.304095	0.476105	0.283452	1.09602	2717	113	TFDP1, VKORC1L1, DDAH1, B4GALT5, UBE2V2, YWHAZ, XPO1, CAPZA1, PAPOLA, NEDD4, CDK6, NFAT5, SCAF4, P4HA1, PI4K2B, PTBP3, AP3S1, RNF44	Up-regulated
IKEDA_MIR30_TARGETS_dn	0.380237	0.554573	0.358618	1.06256	2785	24	RNF139, HSPD1, STK39, PANK1	Up-regulated
INGA_TP53_TARGETS_up	0.692779	0.81307	0.310139	0.83711	4863	16	PCNA, CCNG1, IGFBP3, SFN, BAX, SESN1, PMAIP1, TNFRSF10B	Up-regulated
INGRAM_SHH_TARGETS_up	0.113659	0.234628	-0.23223	-1.16881	113	121	NID1, FBN1, KLF9, CFHR1, NR3C1, ABCA3, KLB, AKAP12, CP, PLPP3, PLTP, PLAC8, MGP, PMP22, TSC22D3, ALX4, DSPP, NOG, BMP5, SIN3A, MUSTN1, INMT, OMD, RASSF8, OLFML2B, IGFBP4, TEK, ZFP36L1, DCN, PI16, NR4A1, UBE2J1, DUSP1, FILIP1L, KLF4, TWIST2, GPR155, SOSTDC1	Down-regulated
INGRAM_SHH_TARGETS_dn	0.0435035	0.113326	-0.309942	-1.37296	74	61	SFRP1, SFRP2, PTN, EVL, PTX3, NREP, TYK2, CLU, MRPL54, SPARC, CALCRL, C3, KDM8, SLC1A3, ITGB7, CAV2, TPPP3, MEGF10, COL1A1, MAGED2, LRRC17, FAM102B, ACHE	Down-regulated
IRITANI_MAD1_TARGETS_dn	0.000126358	0.00109167	0.749824	2.49614	0	43	RPL13, E2F8, CDK1, C1QBP, PPA1, DCTPP1, HSPA9, FBL, DUT, RPL10A, GAS5, MYBBP1A, CPSF3, RPL18, RPSA, GGA2, NPM1, APEX1, SRM, RPL5, RPL12, ASS1, AHCY, EEF1G, RPL22, BABAM1, SLC16A1, CAD, IPO5, RAD23B, WDR74, SLC5A6	Up-regulated
ISHIDA_E2F_TARGETS_up	0.000123594	0.00109167	0.77712	2.67662	0	51	CDCA7, ANLN, PTTG1, EZH2, KPNA2, MKI67, E2F8, BUB1, CDK1, CCNA2, TRIP13, TOP2A, DCTPP1, UBE2T, DUT, CDK2, DBF4, CCNB1, CCNB2, LBR, SLBP, PCNA, PRC1, STMN1, PRIM1, RFC3, HMGB2, MCM3, KIF2C, DNA2, RB1, FEN1, HMGB3, CDC20, RRM1, SMC2, MCM7	Up-regulated
ISSAEVA_MLL2_TARGETS_up	0.00332042	0.0140219	-0.376687	-1.63858	5	56	GSN, FSTL1, ADGRG2, LOXL1, PPP2R2B, KRT17, FHL1, SEMA3B, BMP5, A2M, AXL, COL5A1, TNNC1	Down-regulated
IVANOVA_HEMATOPOIESIS_EARLY_PROGENITOR_up	0.000100969	0.00109167	0.418471	1.78038	0	416	PFDN4, SEC23IP, UFM1, UMPS, ZDHHC9, PDP2, SNRPB2, GGCT, NOLC1, STAM, BZW2, DNAJC15, FDX1, DIMT1, ANKRD23, CUL2, ICE2, GLB1, MPP6, PPA1, GART, HSPA9, GSTO1, CENPM, CYB5B, GPATCH4, MLEC, MARS2, SUV39H2, DDX28, ESD, GMPS, ZNF830, PPP1R14B, MTRF1, CPSF3, RPL18, RSRC1, DHCR7, SLC22A3, PAK1, PRDX1, MYB, DCUN1D4, SRP68, WDR36, LCLAT1, UQCC1, MCMBP, PPIF, DHX9, PRKDC, CTNNBL1, PARP1, ZNF721, CBFB, NUP62,…	Up-regulated
IVANOVA_HEMATOPOIESIS_INTERMEDIATE_PROGENITOR_up	0.000110619	0.00109167	0.453873	1.77431	0	126	TMEM97, GPR180, EIF6, PES1, UBFD1, TRMT6, CEBPZ, GTF3A, DBI, NAA50, KLHL23, BET1, NOL9, PGAM1, DDX52, APEX1, DESI2, ARMT1, AHCY, MDH1, ZNF706, ALDOA, AGPAT5, LMAN2, NOC3L, TMEM186, SSR2, PSMA3, CISD1, ERLIN1, GPT2, GMPPA, TRAPPC13, PARL, POLR3C, TMEM178A, RPN1, ERP44, GUSB, AAGAB, FAM149B1, PLAA, ENOPH1, EEF1B2, SSR1, CUL5, WDR77	Up-regulated
IVANOVA_HEMATOPOIESIS_LATE_PROGENITOR_up	0.000100533	0.00109167	0.356973	1.52783	0	485	CERS6, SERBP1, MRPL16, UBXN2A, CDC6, CHAC1, MYCBP, PRELID3B, TFRC, CDC123, MET, GATC, CCNC, NSDHL, TMEM14C, PRDX3, ANKRD22, SPC25, HBS1L, UBE2V2, NCAPG2, ACP1, ATP6V0B, SLC29A1, CCNB1, TMEM33, CDC25B, GMPS, SLBP, REEP1, CKAP2L, ESCO2, DFFB, ALG8, APOO, MAGOH, HAX1, BIRC5, GGA2, MSMO1, SPTLC2, INSIG2, MRPL50, LPCAT2, GDI2, ANXA3, SLC25A33, ORC4, CKLF, IPMK, SEH1L, LIN9, TROAP, TMEM248, SLPI, RFWD3…	Up-regulated
IVANOVA_HEMATOPOIESIS_MATURE_CELL_up	0.33749	0.511345	0.255473	1.06445	3274	273	PLBD1, CDK8, CDKN3, CCNA2, KDM7A, C1GALT1, ARL6IP1, ACP1, TMPO, AGFG1, USP7, LBR, MTHFD2, LMTK2, PRC1, UPB1, TSPAN17, UBLCP1, MKRN1, CIR1, TCEA1, RAD51C, PPP3R1, ASNS, ARL2BP, MFSD14B, SRI, PI4K2B, NUDT4, SYAP1, CPD, GCNT1, SLC16A1, CLDN4, CTSH, RAB6A, SDCBP, TFDP2, SACM1L, HGSNAT, SERINC5, GPATCH1, LAMP2, LAMP1, TM4SF4, PITHD1, CMTR1, C4orf3, SLC1A5, SLC4A1, STX17, SNX13, CTSB, XPO7, MXI1, SPDL1…	Up-regulated
IVANOVA_HEMATOPOIESIS_STEM_CELL_up	0.114923	0.236473	-0.215032	-1.14933	66	185	PALMD, PYGM, CDK14, EMCN, GEM, NTRK3, SMAD7, PRKACB, ITIH5, ESR1, EGR1, AGXT, CPXM1, SLIT2, PRKG1, SLC23A2, ZDBF2, NRXN1, BAALC, VAMP2, PDE4B, TCF4, NR4A2, EMP1, PARD6G, PDC, KCNK15, MAFF, LPAR4, HYAL1, PEAK1, SYT11, ITGA3, CHN1, ZBTB37, ZRSR2, GAPDHS, IQGAP2, CTSL, SLC35F1, ZC3H12C, NR4A1, SERPINB8, POLR2A, ARL4C, PPP1R9A, JADE1, CXCL14, BCL2L11, PKD2, CCL19, SEC14L3, PITPNC1, PCK1, PEX11A, IL36…	Down-regulated
IVANOVA_HEMATOPOIESIS_STEM_CELL_AND_PROGENITOR_up	0.226561	0.388617	0.253658	1.08831	2256	536	KRT18, MLXIPL, FNBP1L, ARMC10, SMARCC1, DNAJC2, NUFIP1, CNOT1, ARL3, STAMBP, MLEC, CEBPZ, ACTR3B, ITGA6, BPHL, FNBP4, SFR1, SMYD5, RLIM, RPUSD4, SLC4A1AP, ZNF12, DHTKD1, SLC25A36, SMAD5, UQCC1, HMGN5, TAF1D, GPN1, LRRC58, RPS25, DUSP12, EID2, TERF2, NT5C3B, RMND1, ZBTB38, TTPA, TEX43, SPOCK2, GSTK1, SLC39A6, BFAR, ATF6B, HSPA4, FZD6, QSER1, FKBP1A, PRSS8, ABCC1, GTF3C6, ABCF2, FIRRE, RRP1B, CA13,…	Up-regulated
IVANOVA_HEMATOPOIESIS_STEM_CELL_LONG_TERM_up	0.467347	0.633509	-0.187063	-1.00244	228	205	PTPRZ1, FSTL1, TTLL7, JAM2, NPY1R, EYA2, LCA5, PLSCR4, BICC1, SETBP1, ELAVL4, ZAN, PLN, ADARB1, FAM71E1, PRR16, CBX7, ADAM22, ATXN1, TCF7L1, SYNPO, TINF2, MYOM1, PRRX1, ADGRD1, CLIP4, KNDC1, LDHAL6B, SIX5, AK1, PCDH9, SCAPER, CRIM1, STARD6, PCLO, FILIP1, LPP, FAM168A, FLRT3	Down-regulated
IVANOVA_HEMATOPOIESIS_STEM_CELL_SHORT_TERM_up	0.179631	0.329422	0.446623	1.25942	1283	19	NCOA6, BCLAF1, MPHOSPH9, RDM1, PRRG1, SENP6, KIF16B	Up-regulated
[truncated: 3,427 more rows]

## Sheet: CT_C3
pathway	pval	padj	ES	NES	nMoreExtreme	size	leadingEdge	Enrichment
[truncated: 3,254 more rows]

## Sheet: CT_C4
pathway	pval	padj	ES	NES	nMoreExtreme	size	leadingEdge	Enrichment
[truncated: 789 more rows]

## Sheet: CT_C5
pathway	pval	padj	ES	NES	nMoreExtreme	size	leadingEdge	Enrichment
[truncated: 7,996 more rows]

[truncated: 66 more sheets: CT_C6, CT_C7, CT_C8, DE_H, DE_C1, DE_C2, DE_C3, DE_C4, DE_C5, DE_C6, DE_C7, DE_C8, MU_H, MU_C1, MU_C2, MU_C3, MU_C4, MU_C5, MU_C6, MU_C7 …]
