# Supplementary material for: Molecular portraits of colorectal cancer morphological regions
Source: eLife. 2023 Nov 13;12:RP86655. doi: 10.7554/eLife.86655 (PMC10642970; doi:10.7554/eLife.86655)
Supplement: Supplementary file 7. [file elife-86655-supp7.xlsx]

## Sheet: Content
These tables contain the results of differential expression analysis obtained using LIMMA,
showing the genes that are up-/down-regulated in comparisons morphotype vs rest, with stage-adjsutment.
The general model fitted was
gene ~ I(morphotype) + stage
Groups:	(not all necessary present here)
	CT	complex tubular
	DE	desmoplastic
	MU	mucinous
	PP	papillary
	SE	serrated
	TB	solid/trabecular
	NR	tumor-adjacent normal
	ST	tumor-supportive stroma

## Sheet: CT
Gene	logFC	AveExpr	t	P.Value	adj.P.Val	B
PIP5K1B	0.318175	2.3637e-16	4.78933	4.61506e-06	0.123782	1.85151
RPL13	0.328886	-1.79068e-16	4.62732	9.06764e-06	0.123782	1.43123
FRG1	0.431409	2.22045e-16	3.96296	0.000123226	0.656376	-0.194709
RPL21P39	0.317092	2.86509e-16	3.87263	0.000172042	0.656376	-0.402521
RPL13P12	0.274175	-4.1902e-16	3.74882	0.000269483	0.733849	-0.681751
CHAF1B	0.253413	1.89812e-16	3.71396	0.00030522	0.733849	-0.759175
FDX1	0.394413	-1.50417e-16	3.67684	0.000348198	0.733849	-0.841051
RPSAP49	0.314455	7.879e-17	3.66617	0.000361568	0.733849	-0.864462
TFDP1	0.48087	3.43811e-16	3.63475	0.000403832	0.733849	-0.933131
STOX1	0.338866	-4.29764e-17	3.63285	0.000406535	0.733849	-0.937273
DAND5	0.208821	8.95341e-17	3.60542	0.000447476	0.733849	-0.996852
TMEM97P2	0.264062	-1.89812e-16	3.58149	0.000486327	0.733849	-1.04853
SNORD72	0.449935	-3.9395e-17	3.57647	0.000494874	0.733849	-1.05934
RPL21P1	0.265904	6.44646e-17	3.54174	0.000558	0.733849	-1.13382
CCT6A	0.296246	5.73018e-17	3.52278	0.000595596	0.733849	-1.17426
DENND1A	0.396408	-3.79625e-16	3.51295	0.000615994	0.733849	-1.19513
VKORC1L1	0.36417	3.58136e-17	3.50904	0.000624295	0.733849	-1.20343
RPL21P11	0.297632	-6.73297e-16	3.49361	0.000658111	0.733849	-1.23613
HENMT1	0.36573	-1.73696e-16	3.457	0.000745316	0.733849	-1.31322
NDC1	0.39297	8.59528e-17	3.44526	0.000775512	0.733849	-1.33781
CDCA7	0.252252	-1.0386e-16	3.43509	0.00080258	0.733849	-1.35906
AK4P6	0.205923	-1.8265e-16	3.42025	0.000843707	0.733849	-1.38999
WDR4	0.218124	1.21766e-16	3.41754	0.000851425	0.733849	-1.39563
RPL21P119	0.381326	-6.87622e-16	3.41672	0.000853759	0.733849	-1.39732
CLDN1	0.578352	-5.37205e-17	3.41246	0.000866062	0.733849	-1.40617
RPL37AP8	0.294666	-4.33345e-16	3.40147	0.00089858	0.733849	-1.42898
NAA16	0.400487	4.1902e-16	3.37257	0.000989582	0.733849	-1.48865
RPSAP53	0.278233	1.93394e-16	3.36911	0.00100102	0.733849	-1.49575
RPL21	0.378571	1.79068e-16	3.34865	0.00107134	0.733849	-1.53772
CDK8	0.4719	3.54555e-16	3.33961	0.00110386	0.733849	-1.5562
ST13P5	0.188825	2.18463e-16	3.33816	0.00110916	0.733849	-1.55916
TMEM161B-AS1	0.19004	-2.57858e-16	3.32438	0.00116075	0.733849	-1.58725
TPP2	0.375067	-8.59528e-17	3.2917	0.00129221	0.733849	-1.65349
RAD54B	0.447703	2.90091e-16	3.28263	0.0013311	0.733849	-1.67179
HSPH1	0.474568	-7.16273e-17	3.27505	0.00136439	0.733849	-1.68703
SERBP1	0.2141	-3.36648e-16	3.26819	0.00139524	0.733849	-1.70083
APCDD1L	0.231318	4.11857e-16	3.24767	0.00149135	0.733849	-1.74191
RPL21P7	0.303397	-2.18463e-16	3.2476	0.00149172	0.733849	-1.74206
DSN1	0.362605	-7.16273e-18	3.24673	0.00149594	0.733849	-1.7438
RPSAP18	0.168543	3.9395e-16	3.24129	0.00152249	0.733849	-1.75465
TMEM254	0.326319	1.86231e-16	3.23883	0.00153468	0.733849	-1.75957
REEP1	0.306162	-6.44646e-17	3.22835	0.00158748	0.733849	-1.78042
RPL21P3	0.240929	-1.71906e-16	3.22738	0.00159246	0.733849	-1.78235
FOXD2	0.214018	2.11301e-16	3.22689	0.00159496	0.733849	-1.78331
RPL10P1	0.23749	-1.3251e-16	3.21909	0.00163558	0.733849	-1.79881
PUSL1	0.219788	-9.31155e-17	3.21115	0.00167789	0.733849	-1.81454
RPL21P127	0.330437	-5.37205e-17	3.21005	0.00168382	0.733849	-1.81672
TMEM97	0.492485	3.11579e-16	3.20736	0.00169842	0.733849	-1.82204
HMGA1P3	0.218239	4.22601e-16	3.19702	0.0017557	0.733849	-1.84246
TRIP13	0.264704	1.71906e-16	3.19677	0.00175711	0.733849	-1.84296
BRCA2	0.314463	-1.79068e-16	3.19067	0.00179177	0.733849	-1.85498
TCF20	0.34531	4.15438e-16	3.18636	0.00181664	0.733849	-1.86347
HMGB1P10	0.412051	3.97531e-16	3.17447	0.00188694	0.733849	-1.88684
SNORD46	0.430603	6.08832e-17	3.16719	0.00193117	0.733849	-1.9011
RPS3AP3	0.223328	6.98366e-17	3.15375	0.00201547	0.733849	-1.92738
RPS15AP5	0.18695	-2.14882e-17	3.15301	0.00202016	0.733849	-1.92881
KRT8P51	0.239955	1.39673e-16	3.14621	0.00206417	0.733849	-1.94206
TPX2	0.442365	3.4023e-16	3.14329	0.00208337	0.733849	-1.94775
MIPEP	0.309826	-2.14882e-17	3.14248	0.00208871	0.733849	-1.94933
CEACAMP2	0.18177	8.23714e-17	3.1421	0.00209125	0.733849	-1.95007
CYCSP55	0.221067	-3.18741e-16	3.14144	0.0020956	0.733849	-1.95135
HPS6	0.196675	2.07719e-16	3.13957	0.00210801	0.733849	-1.95498
DPH6	0.190968	2.00556e-16	3.13257	0.00215518	0.733849	-1.96859
IGHV3-52	0.28029	3.04416e-16	3.12724	0.00219176	0.733849	-1.97893
ARMC4P1	0.225791	1.79068e-16	3.11735	0.0022611	0.733849	-1.99807
PXDNL	0.150028	2.43533e-16	3.11573	0.00227268	0.733849	-2.00121
RPS21P4	0.433256	6.94785e-16	3.10672	0.00233788	0.733849	-2.01858
PPIAP14	0.165425	-3.43811e-16	3.10524	0.00234878	0.733849	-2.02144
OR10Q2P	0.196843	-2.04138e-16	3.09531	0.00242307	0.733849	-2.04056
RPL6P21	0.159992	-1.79068e-16	3.09387	0.00243398	0.733849	-2.04332
DNAJC5	0.24817	-1.50417e-16	3.09347	0.00243703	0.733849	-2.04409
RPL21P116	0.186654	-4.29764e-16	3.09255	0.0024441	0.733849	-2.04587
RPS2	0.329321	-2.65021e-16	3.08333	0.00251549	0.733849	-2.06354
RPL7P45	0.19196	1.52208e-16	3.07862	0.00255276	0.733849	-2.07256
PIGF	0.284123	-1.71906e-16	3.07509	0.00258097	0.733849	-2.07931
SPNS2	0.271578	4.29764e-16	3.0602	0.00270335	0.733849	-2.10773
SPC25	0.20863	2.29207e-16	3.05777	0.00272383	0.733849	-2.11236
SUN5	0.190101	1.43255e-17	3.05307	0.00276382	0.733849	-2.12129
MMACHC	0.249801	4.22601e-16	3.0502	0.00278848	0.733849	-2.12674
XRCC2	0.368382	-8.41621e-17	3.04956	0.00279407	0.733849	-2.12797
HSPE1P14	0.305931	-3.90369e-16	3.04865	0.00280196	0.733849	-2.12969
SRI	0.416587	-4.04694e-16	3.04703	0.002816	0.733849	-2.13276
TRAV21	0.223163	-1.50417e-16	3.04311	0.00285038	0.733849	-2.1402
SNORD102	0.368643	3.58136e-16	3.03292	0.0029415	0.733849	-2.15948
ASS1P1	0.206867	3.58136e-17	3.03231	0.00294706	0.733849	-2.16064
RPL21P134	0.314556	2.25626e-16	3.02929	0.00297461	0.733849	-2.16634
MGAM2	0.799521	-1.89812e-16	3.02346	0.00302857	0.733849	-2.17735
USP2-AS1	0.227004	-2.00556e-16	3.02204	0.00304181	0.733849	-2.18003
FNBP1L	0.314663	1.93394e-16	3.01476	0.00311068	0.733849	-2.19374
ZNF736	0.200556	-5.73018e-17	3.01419	0.00311612	0.733849	-2.19481
CMTM8	0.336064	-2.97253e-16	3.0118	0.00313907	0.733849	-2.1993
RPL7P48	0.19686	1.0386e-16	3.01085	0.00314822	0.733849	-2.20108
DPP9-AS1	0.212558	1.46836e-16	3.00768	0.00317907	0.733849	-2.20705
OR7E105P	0.20069	-3.76043e-16	3.00647	0.00319086	0.733849	-2.20932
POLQ	0.312285	-1.39673e-16	3.00443	0.00321081	0.733849	-2.21313
PM20D2	0.409806	-2.79346e-16	2.99555	0.00329936	0.733849	-2.22979
RPL21P42	0.269054	-7.16273e-17	2.99326	0.00332247	0.733849	-2.23406
SKA3	0.181456	7.52087e-17	2.99075	0.00334811	0.733849	-2.23876
RPL21P12	0.215639	1.36092e-16	2.98773	0.00337907	0.733849	-2.24439
CERS6	0.479773	2.93672e-16	2.9846	0.00341158	0.733849	-2.25025
KRTAP29-1	0.219535	1.46836e-16	2.98187	0.00344001	0.733849	-2.25533
TBC1D4	0.285975	-3.1516e-16	2.97983	0.00346146	0.733849	-2.25913
RPL12P37	0.169799	-2.86509e-17	2.97614	0.00350057	0.733849	-2.266
GLIS3-AS1	0.203622	-1.11022e-16	2.97554	0.00350703	0.733849	-2.26713
PLBD1	0.499054	2.72184e-16	2.97489	0.00351399	0.733849	-2.26834
RPL12P42	0.189113	6.44646e-17	2.97403	0.00352316	0.733849	-2.26993
ARHGAP44	0.334954	1.46836e-16	2.97028	0.00356355	0.733849	-2.2769
CES3	0.37883	-2.22045e-16	2.96556	0.00361498	0.734787	-2.28566
CICP17	0.177201	2.07719e-16	2.96371	0.0036354	0.734787	-2.28911
RAB11FIP1	0.386807	2.82928e-16	2.96147	0.00366021	0.734787	-2.29326
DHTKD1	0.230007	3.54555e-16	2.95469	0.00373618	0.735511	-2.30582
MLXIPL	0.244557	1.28929e-16	2.95272	0.0037585	0.735511	-2.30946
BRD7P4	0.201796	-8.05807e-17	2.95157	0.00377157	0.735511	-2.31158
GNG5P1	0.191004	1.79068e-17	2.93743	0.00393615	0.741953	-2.33767
RPL35AP19	0.278683	-3.54555e-16	2.93695	0.00394191	0.741953	-2.33856
PDP1	0.367232	-2.32789e-16	2.9328	0.00399151	0.741953	-2.3462
SPHK2	0.169184	3.22323e-16	2.92971	0.00402879	0.741953	-2.35187
BTBD6	0.16573	-1.79068e-16	2.9278	0.00405204	0.741953	-2.35538
IGHV3OR15-7	0.248487	-2.3637e-16	2.92668	0.00406572	0.741953	-2.35744
RPS7P14	0.283227	4.65577e-17	2.92581	0.00407636	0.741953	-2.35904
STAM	0.371352	1.28929e-16	2.92082	0.00413791	0.744912	-2.36818
FAM86B1	0.235489	1.43255e-16	2.91586	0.00420002	0.747673	-2.37728
TRAV24	0.190531	9.31155e-17	2.90948	0.00428101	0.749232	-2.38893
ASS1P7	0.216466	7.3418e-17	2.90659	0.00431822	0.750931	-2.39421
KCNH4	0.184735	1.21766e-16	2.89892	0.00441837	0.756506	-2.40819
LACTB2	0.420241	-8.59528e-17	2.89249	0.00450398	0.760472	-2.41989
KRT8P14	0.21106	4.44089e-16	2.89187	0.00451236	0.760472	-2.42102
TXNP6	0.185285	5.01391e-17	2.88508	0.00460452	0.765018	-2.43334
CEP55	0.260635	-1.39673e-16	2.88371	0.0046234	0.765018	-2.43584
HSPE1P7	0.321932	2.65021e-16	2.88013	0.00467289	0.765771	-2.44233
MTURN	0.236199	-7.16273e-18	2.87804	0.00470206	0.765771	-2.44612
RPL23AP34	0.238029	-1.79068e-16	2.87351	0.0047657	0.765771	-2.45431
NDUFAF6	0.543651	2.93672e-16	2.8731	0.00477143	0.765771	-2.45504
GTF3C3	0.235883	5.01391e-17	2.86867	0.0048346	0.767409	-2.46305
SCCPDH	0.30137	3.43811e-16	2.85716	0.00500218	0.781189	-2.4838
RPL12P21	0.201673	3.22323e-16	2.85265	0.00506928	0.781189	-2.49191
OR7E10P	0.224655	2.14882e-16	2.84884	0.00512655	0.781189	-2.49874
SETP3	0.231326	-6.80459e-17	2.84702	0.00515424	0.781189	-2.50202
RPL21P110	0.185094	-8.95341e-18	2.84633	0.00516469	0.781189	-2.50325
DIAPH3	0.3136	9.31155e-17	2.84356	0.00520707	0.781189	-2.50823
EXOSC8	0.350905	-3.47392e-16	2.84352	0.00520754	0.781189	-2.50828
DARS2	0.244076	-1.79068e-16	2.84147	0.00523915	0.781635	-2.51196
RRS1	0.20601	-5.01391e-17	2.83825	0.00528896	0.784778	-2.51772
SH3BP1	0.194975	-1.71906e-16	2.83171	0.00539165	0.795691	-2.52941
COA6	0.44799	-3.04416e-16	2.82864	0.00544048	0.79858	-2.53489
HSPB7	0.171795	2.93672e-16	2.815	0.00566236	0.807724	-2.55919
SCARNA22	0.322913	-2.65021e-16	2.81167	0.00571772	0.807724	-2.5651
YBX1P6	0.216068	-1.5758e-16	2.80468	0.00583558	0.808746	-2.57749
SPACA6	0.226172	-1.28929e-16	2.80104	0.00589783	0.813245	-2.58394
SMKR1	0.187542	-3.00835e-16	2.79027	0.00608555	0.819503	-2.60296
PTTG1	0.291841	4.22601e-16	2.78983	0.00609332	0.819503	-2.60373
GNG4	0.583246	-2.86509e-17	2.78911	0.00610624	0.819503	-2.60502
HMGN5	0.2763	-7.52087e-17	2.78814	0.00612331	0.819503	-2.60671
EPHA8	0.197351	1.46836e-16	2.78113	0.00624932	0.82882	-2.61907
C1D	0.183885	-1.71906e-16	2.7792	0.00628431	0.82882	-2.62246
WNT7B	0.215196	-1.39673e-16	2.77307	0.00639691	0.82882	-2.63323
MTND2P24	0.134635	-1.21766e-16	2.77283	0.00640121	0.82882	-2.63364
SNORA71D	0.38184	-3.00835e-16	2.77232	0.00641078	0.82882	-2.63454
RPS4Y1	0.635135	-4.40508e-16	2.76842	0.00648342	0.82882	-2.64138
RPS3AP29	0.280648	-3.54555e-16	2.76234	0.00659823	0.82882	-2.65202
RNF139	0.214968	1.11022e-16	2.75824	0.00667677	0.82882	-2.65919
RPL21P50	0.263362	1.28929e-16	2.75748	0.00669133	0.82882	-2.66051
POLR1E	0.200071	4.01113e-16	2.75598	0.00672027	0.82882	-2.66313
SNORD19	0.335063	-1.21766e-16	2.75329	0.00677262	0.82882	-2.66783
ARMC10	0.252408	-1.25348e-16	2.75318	0.0067747	0.82882	-2.66801
THAP5P1	0.208442	-1.68324e-16	2.74942	0.00684831	0.82882	-2.67456
TRAC	0.161731	3.4023e-17	2.74665	0.00690316	0.82882	-2.67939
SNX7	0.168735	-4.01113e-16	2.74304	0.00697501	0.82882	-2.68566
WFIKKN2	0.151578	-1.64743e-16	2.74117	0.00701254	0.82882	-2.68891
RAPGEFL1	0.184514	-3.58136e-17	2.74116	0.00701284	0.82882	-2.68894
CHAD	0.211104	-1.71906e-16	2.7403	0.00703024	0.82882	-2.69044
LCN8	0.194221	-1.43255e-16	2.73967	0.00704294	0.82882	-2.69153
FAM170B-AS1	0.154865	1.8265e-16	2.73522	0.0071332	0.831254	-2.69924
RPSAP20	0.158303	-2.05928e-16	2.73477	0.00714256	0.831254	-2.70004
RPS3AP33	0.200485	9.66968e-17	2.73335	0.00717164	0.831254	-2.7025
GLO1	0.3185	-1.07441e-16	2.72986	0.00724355	0.831254	-2.70854
ARMC10P1	0.240676	-4.65577e-17	2.72957	0.00724967	0.831254	-2.70905
EBPL	0.24915	3.1516e-16	2.72362	0.00737387	0.835359	-2.71933
CELSR2	0.188883	1.21766e-16	2.72183	0.0074118	0.835631	-2.72243
HSPB11	0.220953	-3.86787e-16	2.71204	0.00762158	0.838879	-2.73931
UPB1	0.176233	1.75487e-16	2.71186	0.0076254	0.838879	-2.73961
TRAV8-2	0.177348	3.58136e-17	2.70888	0.00769044	0.838879	-2.74475
MRPL11	0.223427	4.22601e-16	2.70571	0.00776005	0.838879	-2.7502
RPS15AP11	0.230945	3.00835e-16	2.70529	0.00776932	0.838879	-2.75092
RPL8	0.35708	4.29764e-17	2.70164	0.00785034	0.838879	-2.75719
OR7E43P	0.182585	-7.52087e-17	2.7013	0.00785796	0.838879	-2.75778
RPL13P	0.173414	-2.14882e-16	2.70028	0.00788075	0.838879	-2.75952
RPL7P33	0.297327	5.55112e-17	2.69783	0.0079357	0.838879	-2.76372
RPL21P2	0.237947	1.36092e-16	2.69503	0.00799893	0.838879	-2.76852
KDM4A-AS1	0.19761	-4.22601e-16	2.69476	0.00800509	0.838879	-2.76898
DNAJC19P6	0.161975	-3.76043e-17	2.69458	0.00800904	0.838879	-2.76928
GPALPP1	0.301078	4.65577e-17	2.69351	0.00803343	0.838879	-2.77112
RSC1A1	0.269318	-2.29207e-16	2.68953	0.00812447	0.840205	-2.77793
RPL23AP75	0.211072	3.58136e-17	2.68817	0.0081559	0.840273	-2.78026
RPS15AP36	0.199771	-2.11301e-16	2.68632	0.00819848	0.841485	-2.7834
SUGT1P1	0.139468	8.23714e-17	2.68453	0.00824027	0.842606	-2.78647
OCLN	0.324002	1.28929e-16	2.68257	0.00828585	0.843335	-2.7898
FCF1P7	0.140231	1.25348e-17	2.68026	0.00834006	0.843335	-2.79374
UBXN2A	0.200207	-4.22601e-16	2.67291	0.00851483	0.851105	-2.80626
RPL7P2	0.339143	-1.89812e-16	2.66755	0.00864433	0.851105	-2.81537
RPL7P4	0.185646	-6.08832e-17	2.66543	0.00869602	0.851105	-2.81896
CDKN2A	0.253532	9.66968e-17	2.6651	0.00870422	0.851105	-2.81953
RBM12B-AS1	0.235353	-1.36092e-16	2.66291	0.00875797	0.851105	-2.82324
DNAJC2	0.308957	1.0386e-16	2.66199	0.00878051	0.851105	-2.82479
MRPL16	0.26185	7.52087e-17	2.66179	0.00878559	0.851105	-2.82514
OR9A1P	0.263091	1.79068e-17	2.66162	0.00878977	0.851105	-2.82543
POMC	0.171488	-3.36648e-16	2.65425	0.00897351	0.851105	-2.83791
SNORA15	0.161203	1.5758e-16	2.65387	0.00898289	0.851105	-2.83854
SLC25A13	0.255554	-2.11301e-16	2.64774	0.0091386	0.851105	-2.84889
ATP11AUN	0.19713	-1.96975e-17	2.64519	0.00920396	0.851105	-2.85319
SNORA71B	0.213478	-3.58136e-16	2.64411	0.00923177	0.851105	-2.85501
UBA52P5	0.179976	-4.36926e-16	2.64344	0.00924913	0.851105	-2.85614
HSPE1P6	0.421743	1.61161e-16	2.64137	0.00930286	0.851105	-2.85963
ZBTB7B	0.188859	2.90091e-16	2.64129	0.00930485	0.851105	-2.85976
TMPRSS2	0.284204	2.79346e-16	2.64117	0.00930806	0.851105	-2.85997
ERICH2	0.247027	-1.53999e-16	2.64099	0.00931268	0.851105	-2.86026
INTS7	0.2187	-6.08832e-17	2.63894	0.0093661	0.851105	-2.86371
URAHP	0.181255	0	2.6371	0.00941431	0.851105	-2.8668
CBR1	0.292547	7.52087e-17	2.63605	0.00944192	0.851105	-2.86857
SNORA71C	0.377072	-1.64743e-16	2.63096	0.00957699	0.851105	-2.87712
PLK1	0.29485	3.58136e-17	2.62905	0.00962812	0.851105	-2.88033
RPL35AP15	0.149259	1.16394e-16	2.62868	0.00963801	0.851105	-2.88094
WDR5B	0.261537	0	2.62732	0.00967437	0.851105	-2.88321
MUC13	0.436483	-7.16273e-17	2.62531	0.00972878	0.851105	-2.88659
RPL7P6	0.267835	2.90091e-16	2.62368	0.0097731	0.851105	-2.88932
RABGEF1	0.229186	7.52087e-17	2.61701	0.00995563	0.851105	-2.90046
RPS12P15	0.160381	-6.44646e-17	2.61647	0.00997058	0.851105	-2.90136
ALG5	0.296223	5.37205e-17	2.61512	0.010008	0.851105	-2.90361
POLR3A	0.189115	-7.52087e-17	2.61285	0.0100712	0.851105	-2.9074
ACER2	0.203387	2.18463e-16	2.60991	0.0101537	0.851105	-2.91231
LIMK1	0.288383	1.39673e-16	2.60766	0.0102172	0.851105	-2.91606
TMC5	0.461486	7.52087e-17	2.60758	0.0102195	0.851105	-2.91619
PABPC1P1	0.313425	6.08832e-17	2.60337	0.0103391	0.851105	-2.92319
XCL1	0.169645	-1.52208e-16	2.6031	0.0103467	0.851105	-2.92363
HIGD1AP1	0.169048	-1.79068e-17	2.60273	0.0103574	0.851105	-2.92425
OR7E94P	0.180843	1.93394e-16	2.60128	0.0103991	0.851105	-2.92667
TOB2P1	0.142033	-2.72184e-16	2.60011	0.0104327	0.851105	-2.92861
PMS2P10	0.349295	2.50696e-17	2.59943	0.0104524	0.851105	-2.92974
RPL23AP3	0.195248	2.93672e-16	2.59744	0.0105098	0.851105	-2.93303
RPSAP19	0.247311	1.36092e-16	2.59447	0.0105964	0.851105	-2.93796
ZNF451	0.384578	3.58136e-17	2.5944	0.0105983	0.851105	-2.93807
C1QTNF3-AMACR	0.329425	-4.01113e-16	2.59022	0.0107212	0.851105	-2.945
SPTLC1	0.23862	8.23714e-17	2.59016	0.0107231	0.851105	-2.9451
SNX18P14	0.156824	-1.93394e-16	2.59004	0.0107265	0.851105	-2.9453
USP1	0.315073	7.16273e-17	2.58944	0.0107444	0.851105	-2.9463
RPS15AP9	0.198525	1.28929e-16	2.58925	0.0107498	0.851105	-2.9466
BRCC3	0.29118	-3.43811e-16	2.58332	0.0109268	0.851105	-2.95641
RPL21P71	0.208723	-2.75765e-16	2.58222	0.0109598	0.851105	-2.95822
FAM90A25P	0.188644	8.59528e-17	2.58124	0.0109897	0.851105	-2.95985
GET4	0.248229	-2.39951e-16	2.58003	0.011026	0.851105	-2.96183
HSPA14	0.306486	2.04138e-16	2.57913	0.0110533	0.851105	-2.96332
EIF4HP1	0.165081	3.72462e-16	2.57897	0.0110583	0.851105	-2.96359
PTGES2-AS1	0.185422	-3.83206e-16	2.57829	0.0110791	0.851105	-2.96472
RPS15AP17	0.326152	-7.16273e-18	2.57592	0.0111512	0.851105	-2.96861
MCUR1	0.395438	-1.39673e-16	2.57553	0.011163	0.851105	-2.96925
GEMIN8	0.22654	4.83484e-17	2.57495	0.011181	0.851105	-2.97022
DEFB107B	0.152687	7.69993e-17	2.57425	0.0112023	0.851105	-2.97136
HSPE1P3	0.202447	-8.59528e-17	2.5741	0.0112071	0.851105	-2.97161
ODF3L2	0.196518	1.80859e-16	2.57313	0.0112369	0.851105	-2.9732
MGC32805	0.225522	5.90925e-17	2.57311	0.0112376	0.851105	-2.97324
SEC23IP	0.294604	3.54555e-16	2.57221	0.0112652	0.851105	-2.97471
AOAH	0.582205	2.18463e-16	2.57184	0.0112768	0.851105	-2.97534
PMS2P1	0.325436	-2.25626e-16	2.56918	0.0113593	0.851105	-2.97971
B4GALT5	0.241135	-2.04138e-16	2.56824	0.0113886	0.851105	-2.98125
DDAH1	0.28463	-3.29486e-16	2.56519	0.0114839	0.851105	-2.98625
IGHV3OR16-8	0.230704	-2.43533e-16	2.5642	0.011515	0.851105	-2.98788
STK26	0.273235	3.29486e-16	2.56399	0.0115217	0.851105	-2.98822
ZNF830	0.249855	-1.79068e-16	2.56206	0.0115828	0.851105	-2.9914
TOP3BP1	0.14634	-2.00556e-16	2.56175	0.0115927	0.851105	-2.99191
RPIA	0.262317	1.25348e-16	2.55895	0.0116817	0.851105	-2.99649
FAM83F	0.209709	-5.55112e-17	2.55677	0.0117512	0.851105	-3.00005
BOLA2	0.340134	-2.11301e-16	2.55658	0.0117575	0.851105	-3.00037
RPSAP55	0.226381	-2.04138e-16	2.55472	0.0118174	0.851105	-3.00342
LAMTOR5	0.254658	-7.52087e-17	2.55455	0.0118226	0.851105	-3.00368
SPIRE2	0.223984	2.3637e-16	2.5516	0.0119181	0.851105	-3.00851
PTGES3	0.264389	1.39673e-16	2.54631	0.0120912	0.851105	-3.01715
MRPL33	0.236837	2.07719e-16	2.54506	0.0121323	0.851105	-3.01918
DNAI1	0.160971	7.16273e-17	2.54483	0.01214	0.851105	-3.01956
GH2	0.176082	-1.91603e-16	2.54476	0.0121421	0.851105	-3.01966
PAIP2B	0.218531	-1.11022e-16	2.54399	0.0121676	0.851105	-3.02092
TBL1Y	0.169623	3.9395e-17	2.54203	0.0122328	0.851105	-3.02412
TFRC	0.347511	3.58136e-18	2.54141	0.0122532	0.851105	-3.02512
DFFB	0.182947	4.26182e-16	2.53899	0.0123342	0.851105	-3.02907
SNRPD2P1	0.160138	1.43255e-17	2.53867	0.0123449	0.851105	-3.02959
MKLN1-AS	0.225814	1.79068e-16	2.53864	0.0123458	0.851105	-3.02963
PAX2	0.202515	1.18185e-16	2.53822	0.0123601	0.851105	-3.03032
MYL6BP1	0.128248	-2.07719e-16	2.53498	0.0124691	0.851105	-3.03558
KIF18BP1	0.129846	-9.31155e-17	2.53416	0.012497	0.851105	-3.03692
TFAM	0.235245	3.43811e-16	2.53258	0.0125506	0.851105	-3.03948
CERS6-AS1	0.257551	1.36092e-16	2.53137	0.0125918	0.851105	-3.04144
EEF1DP6	0.174114	-2.29207e-16	2.53116	0.012599	0.851105	-3.04178
TRBV5-4	0.151011	7.879e-17	2.53094	0.0126064	0.851105	-3.04214
PA2G4	0.256362	2.57858e-16	2.5309	0.0126078	0.851105	-3.0422
PFDN6	0.199642	-3.86787e-16	2.52916	0.0126673	0.851105	-3.04502
PDP2	0.233226	3.83206e-16	2.52907	0.0126705	0.851105	-3.04517
MRPS16P1	0.152627	2.07719e-16	2.52574	0.0127852	0.851105	-3.05056
CFTRP1	0.167008	2.32789e-16	2.52339	0.0128667	0.851105	-3.05437
PUDPP1	0.185572	3.22323e-17	2.51982	0.0129915	0.851105	-3.06014
NFKBIE	0.146171	4.29764e-17	2.51832	0.0130443	0.851105	-3.06257
KIAA1804	0.181791	-1.61161e-16	2.51814	0.0130505	0.851105	-3.06285
RPS3AP12	0.170133	-3.25904e-16	2.51528	0.0131517	0.851105	-3.06747
IGHVIII-44	0.147472	1.50417e-16	2.51517	0.0131558	0.851105	-3.06766
ZP3	0.228955	-1.39673e-16	2.51436	0.0131846	0.851105	-3.06897
CNOT1	0.284438	1.46836e-16	2.51315	0.0132277	0.851105	-3.07092
RPL19P12	0.204215	2.72184e-16	2.50636	0.0134716	0.851105	-3.08184
IGLV4-69	0.159392	-3.68881e-16	2.50531	0.0135096	0.851105	-3.08353
TEX43	0.150428	-3.9395e-17	2.50465	0.0135339	0.851105	-3.0846
SKP2	0.271905	-1.0386e-16	2.5044	0.0135428	0.851105	-3.08499
RPSAP39	0.167241	2.14882e-16	2.50351	0.0135754	0.851105	-3.08643
NFS1	0.266537	-1.64743e-16	2.50219	0.0136237	0.851105	-3.08855
RPS21	0.498875	6.94785e-16	2.50119	0.0136603	0.851105	-3.09015
FABP5P11	0.209345	-2.18463e-16	2.49901	0.0137405	0.851105	-3.09365
POM121	0.233131	3.86787e-16	2.49839	0.0137633	0.851105	-3.09464
RPL23AP59	0.197246	-3.76043e-17	2.49749	0.0137968	0.851105	-3.09609
SLC25A19	0.181608	1.11022e-16	2.49679	0.0138228	0.851105	-3.09722
PFDN4	0.437059	1.79068e-16	2.49452	0.0139073	0.851105	-3.10086
RPL21P28	0.20579	1.93394e-16	2.49398	0.0139273	0.851105	-3.10171
NCKIPSD	0.167728	-4.40508e-16	2.49206	0.0139989	0.851105	-3.10478
MRPL22	0.218143	1.79068e-18	2.49131	0.0140273	0.851105	-3.10599
NLRP7	0.20097	6.26739e-17	2.4905	0.0140577	0.851105	-3.10728
DUS4L	0.206143	1.21766e-16	2.49028	0.014066	0.851105	-3.10763
RPSAP46	0.169393	2.79346e-16	2.48893	0.0141169	0.851105	-3.10979
RPS15AP7	0.14308	-1.07441e-16	2.48715	0.0141846	0.851105	-3.11265
BCL11A	0.387698	-5.37205e-17	2.48649	0.0142095	0.851105	-3.11369
RPL10AP5	0.196886	1.86231e-16	2.48631	0.0142164	0.851105	-3.11398
ANKRD23	0.203448	-2.00556e-16	2.4861	0.0142245	0.851105	-3.11432
HPDL	0.16143	2.6144e-16	2.48491	0.0142697	0.851105	-3.11622
PPIL6	0.169469	-5.73018e-17	2.48384	0.0143106	0.851105	-3.11792
IFNLR1	0.214873	1.43255e-16	2.48039	0.0144432	0.851105	-3.12343
LRRC37A11P	0.16859	8.23714e-17	2.4795	0.0144773	0.851105	-3.12484
MYCBP	0.351304	3.1516e-16	2.47737	0.0145599	0.851105	-3.12823
PRIM2	0.320109	1.21766e-16	2.47384	0.0146977	0.851105	-3.13385
IPMK	0.222122	-3.50974e-16	2.47339	0.0147155	0.851105	-3.13457
SAP18	0.335118	6.08832e-17	2.47249	0.0147508	0.851105	-3.136
DCLRE1B	0.205797	2.00556e-16	2.47106	0.0148072	0.851105	-3.13828
CNN2P7	0.148288	-8.95341e-17	2.46903	0.0148874	0.851105	-3.14149
PMS2P3	0.196394	3.86787e-16	2.46895	0.0148906	0.851105	-3.14162
ITGA2B	0.141552	-2.79346e-16	2.46733	0.014955	0.851105	-3.14419
HSD17B1P1	0.163908	-1.21766e-16	2.46546	0.0150296	0.851105	-3.14716
PSTK	0.174231	-3.58136e-17	2.46365	0.0151021	0.851105	-3.15003
HMGB3P5	0.145206	-1.96975e-17	2.46274	0.0151385	0.851105	-3.15147
GIPC2	0.397363	3.50974e-16	2.46268	0.015141	0.851105	-3.15156
RAB33B	0.207284	-7.16273e-17	2.45926	0.0152792	0.851105	-3.15698
SBF1P1	0.170441	-1.36092e-16	2.45814	0.0153247	0.851105	-3.15875
PPP1R1B	0.227128	3.43811e-16	2.45729	0.0153591	0.851105	-3.16009
UBE2CP1	0.209943	-1.93394e-16	2.4565	0.0153915	0.851105	-3.16134
SLC41A3	0.160461	1.43255e-16	2.45549	0.0154327	0.851105	-3.16293
SLC39A4	0.254655	0	2.45434	0.01548	0.851105	-3.16476
ZNF529	0.193371	-4.83484e-17	2.4543	0.0154816	0.851105	-3.16482
RPL35P1	0.227372	-1.14604e-16	2.45114	0.0156118	0.851105	-3.16981
APTR	0.265099	-1.00278e-16	2.45093	0.0156206	0.851105	-3.17014
IL17RE	0.159698	1.5758e-16	2.44995	0.0156609	0.851105	-3.17168
SMARCC1	0.26713	-2.43533e-16	2.44976	0.0156689	0.851105	-3.17198
TAB3	0.236147	5.73018e-17	2.44757	0.01576	0.851105	-3.17543
KRTAP17-1	0.169666	-1.11022e-16	2.4472	0.0157753	0.851105	-3.17601
SYNPR	0.15155	-5.73018e-17	2.44475	0.0158781	0.851105	-3.17987
RPS7P11	0.444108	2.54277e-16	2.4441	0.0159053	0.851105	-3.18089
FIS1	0.250209	-2.93672e-16	2.44312	0.0159464	0.851105	-3.18243
RPL21P120	0.230332	-1.93394e-16	2.44258	0.0159691	0.851105	-3.18328
SH3RF2	0.214764	-9.66968e-17	2.44125	0.0160254	0.851105	-3.18537
CHCHD3	0.217411	6.44646e-17	2.43804	0.0161616	0.851105	-3.19041
CYP4F8	0.218899	-1.89812e-16	2.438	0.0161633	0.851105	-3.19047
CHAC1	0.183207	-2.00556e-16	2.43768	0.0161771	0.851105	-3.19098
PARPBP	0.300404	-4.40508e-16	2.43704	0.0162045	0.851105	-3.19198
KRT18	0.431687	-3.9395e-16	2.43661	0.0162227	0.851105	-3.19265
NUPR2	0.126114	2.50696e-16	2.43555	0.0162682	0.851105	-3.19432
FAM225B	0.122526	2.65021e-16	2.43548	0.0162714	0.851105	-3.19444
TAGLN2P1	0.174429	1.5758e-16	2.43318	0.0163704	0.851105	-3.19805
CSF3	0.153204	1.86231e-16	2.43214	0.016415	0.851105	-3.19966
ASS1P4	0.188458	-2.14882e-16	2.43206	0.0164186	0.851105	-3.19979
STIL	0.24211	-1.27138e-16	2.43137	0.0164485	0.851105	-3.20087
NUDCD3	0.20671	-2.82928e-16	2.42968	0.0165217	0.851105	-3.20351
TRMT11	0.232707	6.08832e-17	2.42952	0.0165289	0.851105	-3.20377
CKS2	0.460308	-1.50417e-16	2.42912	0.0165461	0.851105	-3.20439
ZNF138	0.243052	3.00835e-16	2.42829	0.0165824	0.851105	-3.2057
RPL12P10	0.166169	-4.08276e-16	2.42823	0.016585	0.851105	-3.20579
ORC5	0.282332	8.59528e-17	2.42714	0.0166328	0.851105	-3.2075
UOX	0.121569	1.96975e-17	2.4235	0.0167927	0.851105	-3.21319
SLC25A15P1	0.158661	-8.41621e-17	2.42246	0.0168385	0.851105	-3.21481
KSR1	0.166263	-2.86509e-17	2.42234	0.0168437	0.851105	-3.21499
CASP1	0.335919	2.22045e-16	2.42228	0.0168462	0.851105	-3.21508
ATIC	0.291223	8.95341e-17	2.42202	0.0168577	0.851105	-3.21549
TEX264	0.147591	-2.93672e-16	2.41912	0.0169867	0.851105	-3.22002
RPL19P13	0.171276	-1.89812e-16	2.41907	0.0169892	0.851105	-3.2201
MEI1	0.180104	4.15438e-16	2.41828	0.0170242	0.851105	-3.22132
RPUSD2	0.126676	2.50696e-16	2.41808	0.017033	0.851105	-3.22163
NUP62	0.113523	-2.29207e-16	2.41675	0.0170927	0.851105	-3.22371
MFAP3L	0.202639	-2.07719e-16	2.41423	0.0172059	0.851105	-3.22763
CENPM	0.223736	-2.32789e-16	2.41382	0.0172243	0.851105	-3.22827
RBMS3-AS3	0.168666	-1.21766e-16	2.40932	0.0174285	0.851105	-3.23526
RPSAP15	0.248989	7.16273e-17	2.40765	0.0175048	0.851105	-3.23786
SETDB2	0.202833	2.86509e-17	2.40678	0.0175448	0.851105	-3.23921
GEMIN2P2	0.15951	-1.39673e-16	2.40582	0.0175891	0.851105	-3.24071
ATAD2	0.236469	2.22045e-16	2.40562	0.0175981	0.851105	-3.24101
MAPRE1	0.180396	-1.61161e-16	2.40453	0.0176483	0.851105	-3.24271
P3H2	0.161671	-1.43255e-16	2.40425	0.0176614	0.851105	-3.24315
CYB561D2	0.156667	8.23714e-17	2.40385	0.0176799	0.851105	-3.24377
TOMM34	0.295132	-1.71906e-16	2.40286	0.0177254	0.851105	-3.24529
ZNF697	0.14998	2.22045e-16	2.40187	0.0177713	0.851105	-3.24683
PPP1CC	0.287473	7.16273e-18	2.39966	0.0178742	0.851105	-3.25025
FAM182B	0.157773	9.66968e-17	2.39722	0.017988	0.851105	-3.25402
GPR153	0.176866	-4.01113e-16	2.39708	0.0179948	0.851105	-3.25424
TATDN1	0.368469	-1.43255e-17	2.39684	0.0180062	0.851105	-3.25462
MTCYBP5	0.190685	1.21766e-16	2.39602	0.0180443	0.851105	-3.25587
PRRT3-AS1	0.255029	9.31155e-17	2.39523	0.0180818	0.851105	-3.25711
TOE1	0.148721	-6.80459e-17	2.39494	0.0180952	0.851105	-3.25754
HSD17B7P2	0.269081	1.28929e-16	2.39407	0.0181366	0.851105	-3.2589
MED15P5	0.174824	-4.08276e-16	2.39058	0.0183021	0.851105	-3.26429
MAPK4	0.159972	-1.71906e-16	2.38773	0.0184384	0.851105	-3.26869
THEM7P	0.127602	1.25348e-17	2.38769	0.0184401	0.851105	-3.26874
RPL21P23	0.157448	1.53999e-16	2.38755	0.0184469	0.851105	-3.26896
RPS10P27	0.15238	1.93394e-16	2.38734	0.018457	0.851105	-3.26928
SGF29	0.172032	-1.21766e-16	2.387	0.0184731	0.851105	-3.2698
RPS26P49	0.142145	2.86509e-17	2.38583	0.0185293	0.851105	-3.2716
OPN1MW	0.158379	-3.58136e-17	2.38526	0.0185569	0.851105	-3.27248
SLC5A3	0.174743	-3.61718e-16	2.38412	0.0186121	0.851105	-3.27425
UCHL3	0.300227	1.43255e-17	2.38305	0.0186637	0.851105	-3.27589
MCM10	0.206627	1.43255e-17	2.3814	0.0187439	0.851105	-3.27843
PTTG3P	0.163753	4.65577e-17	2.38131	0.0187481	0.851105	-3.27856
MTCYBP1	0.143006	7.69993e-17	2.38015	0.0188045	0.851105	-3.28034
HIGD1AP10	0.137865	2.13091e-16	2.37976	0.0188237	0.851105	-3.28094
PRKAR2A	0.147615	1.5758e-16	2.37813	0.0189033	0.851105	-3.28344
RPL23AP12	0.147718	1.79068e-17	2.37793	0.0189131	0.851105	-3.28375
MYL6P5	0.14411	-1.71906e-16	2.37528	0.0190437	0.851105	-3.28783
MTCO2P29	0.121221	-8.41621e-17	2.37427	0.0190934	0.851105	-3.28937
MRGPRX3	0.140406	2.86509e-17	2.37423	0.0190953	0.851105	-3.28943
GCNT1	0.284054	-2.65021e-16	2.37369	0.0191223	0.851105	-3.29027
ACOT6	0.160783	1.46836e-16	2.37299	0.0191566	0.851105	-3.29133
PPIAP15	0.167068	1.68324e-16	2.37241	0.0191857	0.851105	-3.29223
SNORD13	0.202237	-2.86509e-17	2.37174	0.0192189	0.851105	-3.29325
DNMBP	0.319153	-4.15438e-16	2.37167	0.0192224	0.851105	-3.29336
SYK	0.233167	4.08276e-16	2.37037	0.0192873	0.851105	-3.29536
GIPR	0.170505	-1.46836e-16	2.37018	0.0192966	0.851105	-3.29564
RPLP1	0.229633	6.15995e-16	2.37003	0.0193042	0.851105	-3.29587
PLCH2	0.126089	-2.07719e-16	2.36911	0.0193498	0.851105	-3.29727
FAM133DP	0.150152	-1.68324e-16	2.36875	0.0193682	0.851105	-3.29783
SLC7A5	0.306108	2.43533e-16	2.36829	0.0193911	0.851105	-3.29853
RPL30P4	0.384554	-1.07441e-16	2.36762	0.0194248	0.851105	-3.29956
RUNDC3B	0.148902	-1.55789e-16	2.36736	0.0194376	0.851105	-3.29995
GDI2P2	0.16267	-1.53999e-16	2.36606	0.0195029	0.851105	-3.30194
NDFIP2	0.239724	1.86231e-16	2.36585	0.0195135	0.851105	-3.30226
TSPAN32	0.153039	2.43533e-16	2.36487	0.0195631	0.851105	-3.30376
MRPL30P1	0.199791	-4.33345e-16	2.36443	0.0195854	0.851105	-3.30443
RPL21P131	0.23106	2.57858e-16	2.36428	0.019593	0.851105	-3.30466
THOC7	0.309779	5.37205e-17	2.36379	0.0196177	0.851105	-3.30541
ST13P4	0.181876	-4.36926e-16	2.36275	0.0196708	0.851105	-3.30701
PPIAP2	0.141973	1.36092e-16	2.36271	0.0196725	0.851105	-3.30706
BEND4	0.148622	1.07441e-17	2.36126	0.0197464	0.851105	-3.30928
RPSAP10	0.126379	-2.43533e-16	2.36094	0.0197626	0.851105	-3.30976
CLDN18	0.243087	-1.14604e-16	2.36064	0.0197781	0.851105	-3.31023
IL9RP3	0.146669	-1.46836e-16	2.35797	0.0199143	0.851105	-3.31429
RPL7AP8	0.159037	2.25626e-16	2.35754	0.0199363	0.851105	-3.31494
RPS24P13	0.210473	2.13091e-16	2.35738	0.0199446	0.851105	-3.31519
STOML2	0.266927	-1.36092e-16	2.35611	0.0200099	0.851105	-3.31712
FTLP4	0.136768	-6.08832e-17	2.35607	0.0200121	0.851105	-3.31718
ANXA10	0.210405	1.07441e-16	2.35574	0.0200293	0.851105	-3.31769
RPL30P7	0.301587	3.72462e-16	2.35503	0.0200659	0.851105	-3.31877
BAD	0.203224	-1.14604e-16	2.35341	0.0201496	0.851105	-3.32123
OCM	0.184435	1.21766e-16	2.35334	0.0201533	0.851105	-3.32134
NDUFA5P11	0.193076	2.50696e-17	2.35162	0.0202429	0.851105	-3.32397
RORA-AS1	0.195502	-5.73018e-17	2.35144	0.0202519	0.851105	-3.32423
RPL35AP32	0.139163	3.36648e-16	2.35054	0.020299	0.851105	-3.3256
EIF3E	0.409306	1.07441e-16	2.34843	0.0204096	0.851105	-3.32881
WDR82	0.181367	1.8265e-16	2.34839	0.0204116	0.851105	-3.32887
DLX6-AS2	0.128356	-2.18463e-16	2.34755	0.0204557	0.851105	-3.33015
EFCAB1	0.125617	3.58136e-18	2.34711	0.0204789	0.851105	-3.33082
SPTLC2	0.387922	-1.41464e-16	2.34551	0.0205628	0.851105	-3.33323
RPL12P19	0.179434	3.1516e-16	2.34433	0.0206255	0.851105	-3.33503
HLTF	0.265676	-1.79068e-17	2.34398	0.0206439	0.851105	-3.33556
BCCIP	0.242411	-3.07997e-16	2.3418	0.0207598	0.851105	-3.33887
MFN1	0.139061	1.21766e-16	2.34096	0.0208045	0.851105	-3.34014
UBFD1	0.230992	-1.36092e-16	2.3409	0.0208077	0.851105	-3.34023
C4orf19	0.143438	1.86231e-16	2.34072	0.0208171	0.851105	-3.3405
UFM1	0.298931	-3.72462e-16	2.34012	0.020849	0.851105	-3.3414
ALG1	0.256186	2.54277e-16	2.33757	0.0209861	0.851105	-3.34527
RPLP2	0.291491	4.44089e-16	2.3374	0.0209949	0.851105	-3.34552
RPSAP58	0.213812	2.32789e-16	2.33735	0.0209976	0.851105	-3.3456
UBL5P2	0.246413	2.50696e-17	2.33593	0.0210741	0.851105	-3.34774
LSM3P2	0.18331	-1.75487e-16	2.33545	0.0211001	0.851105	-3.34847
CSE1L	0.352684	3.47392e-16	2.33417	0.0211696	0.851105	-3.35041
BIVM-ERCC5	0.240972	5.01391e-17	2.33389	0.0211845	0.851105	-3.35083
ITGA6	0.304759	1.89812e-16	2.33364	0.0211981	0.851105	-3.35121
CSTF1	0.255154	1.53999e-16	2.33338	0.0212119	0.851105	-3.35159
RPS23P2	0.208836	-1.93394e-16	2.32917	0.0214416	0.851105	-3.35795
TMEM41A	0.15958	2.68602e-16	2.32734	0.0215421	0.851105	-3.36071
DCTPP1	0.203058	2.57858e-16	2.32559	0.0216385	0.851105	-3.36335
SNORD22	0.373853	2.14882e-17	2.3253	0.0216546	0.851105	-3.36378
SIVA1	0.115378	5.01391e-17	2.32512	0.0216648	0.851105	-3.36406
RHPN1-AS1	0.175591	2.68602e-16	2.32471	0.021687	0.851105	-3.36467
TRMT112	0.200592	2.86509e-16	2.32431	0.0217091	0.851105	-3.36527
CYP2C58P	0.119143	1.18185e-16	2.32422	0.0217144	0.851105	-3.36541
SLC4A1AP	0.156253	1.11022e-16	2.32415	0.0217181	0.851105	-3.36551
RPL21P67	0.149764	-2.14882e-16	2.32402	0.0217252	0.851105	-3.3657
KLHL9	0.134328	5.37205e-17	2.32384	0.0217354	0.851105	-3.36598
BBS10	0.152052	-7.879e-17	2.32374	0.0217411	0.851105	-3.36614
MRPL55	0.207356	3.58136e-17	2.32371	0.0217427	0.851105	-3.36618
OR2R1P	0.146038	-3.00835e-16	2.32322	0.0217696	0.851105	-3.36691
COMMD8	0.138749	1.75487e-16	2.32277	0.0217945	0.851105	-3.36758
PPIAP7	0.161627	3.36648e-16	2.3211	0.0218879	0.851105	-3.37011
PMS2P4	0.14795	1.07441e-16	2.31985	0.0219576	0.851105	-3.37198
RPL7P20	0.24223	7.879e-17	2.31971	0.0219653	0.851105	-3.37219
IGHVIII-5-2	0.145235	1.75487e-16	2.31869	0.0220223	0.851105	-3.37371
RPL29P33	0.209197	2.39951e-16	2.31814	0.0220534	0.851105	-3.37455
POLR1D	0.239628	-3.58136e-16	2.31685	0.0221261	0.851105	-3.37649
SATL1	0.151703	-2.20254e-16	2.31426	0.022272	0.851105	-3.38036
RFC2	0.198686	-1.68324e-16	2.31416	0.0222779	0.851105	-3.38052
NIPAL2	0.378683	-3.43811e-16	2.31227	0.0223853	0.851105	-3.38336
NRBF2P1	0.162008	0	2.31216	0.0223916	0.851105	-3.38352
IFT140	0.158226	-1.75487e-16	2.3112	0.0224459	0.851105	-3.38495
RBP3	0.158739	-2.14882e-17	2.31077	0.0224707	0.851105	-3.3856
RPS2P46	0.28461	6.80459e-16	2.31007	0.0225107	0.851105	-3.38665
TMED10P2	0.140995	7.16273e-18	2.30943	0.0225472	0.851105	-3.3876
HERC5	0.237055	6.98366e-17	2.30925	0.0225572	0.851105	-3.38786
RBL1	0.284974	-1.46836e-16	2.30865	0.0225919	0.851105	-3.38877
MSI1	0.207018	-1.64743e-16	2.30703	0.0226852	0.851105	-3.3912
LAGE3	0.168811	-4.44089e-16	2.30666	0.0227064	0.851105	-3.39175
DBF4P1	0.184721	-1.07441e-16	2.30589	0.0227508	0.851105	-3.3929
HADHAP1	0.138816	-3.58136e-17	2.30469	0.0228202	0.851105	-3.39469
CCT6P1	0.272214	3.58136e-17	2.30411	0.0228534	0.851105	-3.39555
TRMT10A	0.169945	-1.64743e-16	2.3034	0.0228948	0.851105	-3.39662
KDM7A	0.239467	-2.00556e-16	2.30237	0.0229543	0.851105	-3.39814
ADK	0.23155	1.89812e-16	2.30212	0.0229693	0.851105	-3.39853
RPS15AP38	0.369133	-3.58136e-17	2.30201	0.0229756	0.851105	-3.39869
PPARG	0.225848	4.65577e-17	2.3016	0.0229993	0.851105	-3.3993
SNX5P1	0.169003	1.25348e-16	2.30136	0.0230132	0.851105	-3.39965
NCOA6	0.288374	1.5758e-16	2.30134	0.0230146	0.851105	-3.39969
ASS1P9	0.234005	-2.54277e-16	2.30071	0.023051	0.851105	-3.40062
RNF5P1	0.164277	-6.44646e-17	2.30026	0.0230777	0.851105	-3.4013
ALKBH7	0.14462	-2.32789e-16	2.29866	0.0231713	0.851105	-3.40368
SNORA78	0.192966	2.93672e-16	2.29861	0.0231738	0.851105	-3.40375
VDAC1P4	0.177173	1.93394e-16	2.29853	0.0231786	0.851105	-3.40387
UMPS	0.192209	2.11301e-16	2.29818	0.0231996	0.851105	-3.4044
NPM1P45	0.155008	-3.47392e-16	2.29815	0.0232013	0.851105	-3.40445
ACAD10	0.220436	-1.59371e-16	2.29714	0.0232603	0.851105	-3.40594
RPL36P16	0.140516	-4.15438e-16	2.29536	0.0233654	0.851105	-3.4086
DGAT1	0.309573	-4.36926e-16	2.29466	0.0234067	0.851105	-3.40963
MOSPD3	0.186886	1.14604e-16	2.29442	0.0234211	0.851105	-3.41
TOX4	0.203491	-1.64743e-16	2.29436	0.0234245	0.851105	-3.41008
RPL36P19	0.147075	-2.50696e-16	2.29415	0.0234371	0.851105	-3.4104
TREML3P	0.127026	-6.08832e-17	2.29338	0.0234827	0.851105	-3.41154
ZSWIM1	0.222425	-7.16273e-18	2.29241	0.0235402	0.851105	-3.41298
TSEN15	0.144323	2.22045e-16	2.29172	0.0235812	0.851105	-3.41401
PSME2P2	0.16092	3.07997e-16	2.2914	0.0236006	0.851105	-3.41449
ZNF780A	0.252092	-1.8265e-16	2.29124	0.0236099	0.851105	-3.41472
PCGEM1	0.154616	-3.22323e-17	2.29121	0.0236119	0.851105	-3.41477
GINS1	0.214877	1.96975e-16	2.29104	0.0236217	0.851105	-3.41502
PHBP1	0.1584	5.73018e-17	2.28904	0.0237415	0.851105	-3.41799
TUFMP1	0.164325	-3.76043e-16	2.28898	0.0237447	0.851105	-3.41807
GLB1	0.191985	-3.11579e-16	2.28888	0.0237511	0.851105	-3.41823
SNRPGP5	0.210275	2.32789e-16	2.28746	0.023836	0.851105	-3.42033
SORCS3-AS1	0.142054	-2.00556e-16	2.28623	0.0239102	0.851105	-3.42216
RPL5P11	0.114344	6.80459e-17	2.28169	0.0241851	0.853403	-3.42888
PARP12	0.208157	-4.36926e-16	2.2813	0.0242091	0.853403	-3.42946
EIF6	0.250206	-3.65299e-16	2.27983	0.0242989	0.853403	-3.43164
LHFPL4	0.188474	7.3418e-17	2.27933	0.0243291	0.853403	-3.43237
TAS2R62P	0.19776	1.3251e-16	2.27933	0.0243291	0.853403	-3.43237
MRPL20P1	0.132578	-7.52087e-17	2.27599	0.0245343	0.853403	-3.43731
RNF6	0.324557	-3.11579e-16	2.27598	0.0245353	0.853403	-3.43733
SLC3A1	0.33771	-7.16273e-18	2.27589	0.0245406	0.853403	-3.43746
SLC47A2	0.147426	-1.11022e-16	2.27577	0.0245479	0.853403	-3.43763
AMHR2	0.151647	-1.39673e-16	2.27387	0.0246654	0.853403	-3.44044
MRPS31	0.184309	-1.21766e-16	2.27358	0.0246837	0.853403	-3.44087
ZIK1	0.134805	2.20254e-16	2.27351	0.024688	0.853403	-3.44098
RPL7P47	0.263867	-3.58136e-16	2.27182	0.0247931	0.853403	-3.44347
COPS7B	0.201537	-1.00278e-16	2.2715	0.024813	0.853403	-3.44394
MTVR2	0.168371	1.18185e-16	2.27131	0.0248247	0.853403	-3.44422
PIK3R1	0.323073	-1.53999e-16	2.2709	0.02485	0.853403	-3.44482
TRBV12-3	0.13815	1.25348e-16	2.2681	0.0250255	0.8543	-3.44895
RPL4P5	0.192846	2.57858e-16	2.26783	0.025042	0.8543	-3.44934
MRPL45P2	0.183567	1.21766e-16	2.26746	0.0250651	0.8543	-3.44988
SUGT1	0.317544	1.36092e-16	2.26643	0.0251302	0.8543	-3.4514
TM9SF2	0.243994	1.43255e-17	2.26272	0.0253648	0.8543	-3.45686
MFSD8	0.208713	-1.61161e-16	2.26153	0.0254404	0.8543	-3.45861
MTCO2P11	0.181187	-5.37205e-17	2.26136	0.0254515	0.8543	-3.45886
CCDC140	0.155595	2.00556e-16	2.26135	0.0254521	0.8543	-3.45888
GFM2	0.224252	2.14882e-17	2.26117	0.0254636	0.8543	-3.45914
RPL7P58	0.299315	3.00835e-16	2.26114	0.0254653	0.8543	-3.45918
COPS7A	0.169595	7.52087e-17	2.26111	0.0254671	0.8543	-3.45922
PIBF1	0.291022	-2.90091e-16	2.26104	0.0254713	0.8543	-3.45932
CDKL3	0.170754	9.66968e-17	2.26038	0.0255136	0.8543	-3.46029
MTHFD2L	0.16377	-1.23557e-16	2.25988	0.0255455	0.8543	-3.46103
RPL30P15	0.182169	-1.21766e-16	2.25942	0.025575	0.8543	-3.4617
BPHL	0.175094	-3.9395e-17	2.25929	0.0255835	0.8543	-3.4619
PRSS8	0.186587	2.86509e-17	2.25898	0.0256031	0.8543	-3.46235
LRFN1	0.15457	1.79068e-18	2.25844	0.0256379	0.8543	-3.46315
LMBRD2	0.232519	-7.52087e-17	2.25827	0.0256485	0.8543	-3.46339
MVD	0.131255	2.57858e-16	2.25818	0.0256542	0.8543	-3.46352
RPL23AP86	0.230316	1.79068e-16	2.258	0.0256662	0.8543	-3.46379
GGH	0.33908	7.879e-17	2.25763	0.0256897	0.8543	-3.46433
ISCA1P1	0.210381	1.53999e-16	2.25633	0.0257733	0.854941	-3.46624
DGAT2	0.184887	1.43255e-17	2.25535	0.0258367	0.854941	-3.46768
EIF3FP1	0.125891	1.68324e-16	2.25374	0.0259406	0.854941	-3.47003
OR2M4	0.170975	-1.86231e-16	2.2537	0.0259433	0.854941	-3.47009
YPEL4	0.164921	3.9395e-17	2.25359	0.0259504	0.854941	-3.47025
EEF1B2P1	0.195183	-3.29486e-16	2.25262	0.0260134	0.854941	-3.47168
RPL12P35	0.196688	3.00835e-16	2.25187	0.0260618	0.854941	-3.47277
PSENEN	0.210573	-3.36648e-16	2.25154	0.0260832	0.854941	-3.47325
DDX39BP1	0.133211	3.58136e-16	2.25152	0.0260847	0.854941	-3.47328
MARS2	0.215337	2.39951e-16	2.24822	0.0263004	0.856841	-3.47811
DICER1-AS1	0.184094	-2.22045e-16	2.24792	0.0263198	0.856841	-3.47854
FDX1P1	0.163887	-2.79346e-16	2.24673	0.0263977	0.856841	-3.48028
EPHB2	0.318912	1.07441e-16	2.24606	0.026442	0.856841	-3.48126
OR7E26P	0.181202	1.18185e-16	2.24557	0.0264744	0.856841	-3.48198
RPSAP54	0.191254	-2.86509e-16	2.24548	0.02648	0.856841	-3.4821
NALCN	0.138635	7.879e-17	2.24511	0.0265042	0.856841	-3.48264
LYRM1	0.240306	-1.75487e-16	2.24458	0.0265395	0.856841	-3.48341
PABPC1P7	0.165561	-1.07441e-16	2.24441	0.0265504	0.856841	-3.48366
RPL12P8	0.122936	4.22601e-16	2.24441	0.0265507	0.856841	-3.48366
IARS2	0.233518	2.57858e-16	2.24268	0.026665	0.859515	-3.48618
FTH1P23	0.234233	1.43255e-17	2.24186	0.0267199	0.859706	-3.48739
RPS7P10	0.217968	1.79068e-16	2.24165	0.0267339	0.859706	-3.48769
CSMD2	0.194002	1.61161e-16	2.2404	0.0268169	0.859889	-3.48951
EIF4A2	0.285486	-7.16273e-18	2.24022	0.0268285	0.859889	-3.48976
KRIT1	0.388581	-2.32789e-16	2.23923	0.0268951	0.859889	-3.49122
ETV2	0.133859	-3.29486e-16	2.23915	0.0269002	0.859889	-3.49133
DUT	0.207383	2.25626e-16	2.23633	0.0270892	0.859889	-3.49543
FOXP3	0.167858	1.00278e-16	2.23618	0.0270991	0.859889	-3.49564
PRAMEF35P	0.129539	-2.18463e-16	2.2359	0.0271184	0.859889	-3.49606
HSPE1P28	0.19633	2.13091e-16	2.23577	0.0271267	0.859889	-3.49624
NPM1P39	0.190929	4.08276e-16	2.23511	0.0271716	0.859889	-3.49721
NF1P8	0.127174	-1.43255e-17	2.23506	0.027175	0.859889	-3.49728
RP9P	0.221364	8.95341e-17	2.23497	0.0271806	0.859889	-3.4974
LAPTM4BP1	0.142475	1.21766e-16	2.23408	0.0272411	0.860774	-3.4987
LANCL2	0.233291	1.18185e-16	2.23244	0.027352	0.862314	-3.50108
RPL7P8	0.203163	-3.9395e-17	2.23181	0.0273949	0.86267	-3.502
SNRPGP2	0.152405	-1.86231e-16	2.23129	0.0274301	0.862783	-3.50275
CA13	0.209598	-3.90369e-16	2.22899	0.027587	0.864293	-3.50609
EVI5L	0.153719	-2.29207e-16	2.22846	0.0276227	0.864293	-3.50685
DDX19B	0.188596	1.79068e-16	2.22727	0.0277048	0.864293	-3.50858
TMEM60	0.225441	4.36926e-16	2.22694	0.027727	0.864293	-3.50905
RPSAP74	0.128673	-2.86509e-17	2.22673	0.0277414	0.864293	-3.50936
PARD6B	0.187812	1.64743e-16	2.22629	0.0277721	0.864293	-3.51
MPP6	0.221439	-3.11579e-16	2.22573	0.0278102	0.864293	-3.51081
SNORA5A	0.263057	1.89812e-16	2.22544	0.0278305	0.864293	-3.51123
SMYD5	0.152986	-2.00556e-16	2.22504	0.0278579	0.864293	-3.51181
RBAK-RBAKDN	0.159358	-3.1516e-16	2.22338	0.0279726	0.865179	-3.51421
FAM53C	0.167046	-3.86787e-16	2.22322	0.0279836	0.865179	-3.51444
SERPINB9P1	0.134463	8.23714e-17	2.22279	0.0280133	0.865179	-3.51506
ECHDC3	0.202825	3.58136e-17	2.22043	0.0281771	0.865288	-3.51847
ASIC2	0.147412	-3.58136e-18	2.22003	0.0282046	0.865288	-3.51904
HIGD1AP18	0.188687	1.61161e-16	2.21876	0.0282935	0.865288	-3.52088
SLC25A22	0.154772	-2.79346e-16	2.21836	0.0283211	0.865288	-3.52145
AGMAT	0.237174	-3.1516e-16	2.21835	0.0283223	0.865288	-3.52148
NOLC1	0.222585	-1.5758e-16	2.21816	0.0283355	0.865288	-3.52175
RPS27P5	0.151317	-3.9395e-16	2.21675	0.0284345	0.865288	-3.52379
RINL	0.126902	1.00278e-16	2.21644	0.0284555	0.865288	-3.52422
MOXD2P	0.150284	-1.16394e-16	2.21637	0.0284605	0.865288	-3.52432
FAM200A	0.159983	-8.95341e-17	2.21366	0.0286515	0.866272	-3.52823
KRTCAP3	0.249509	-6.80459e-17	2.21247	0.0287359	0.867005	-3.52995
RPL31P35	0.213597	1.43255e-16	2.2124	0.0287409	0.867005	-3.53006
DBI	0.227895	-7.16273e-17	2.21197	0.028771	0.867005	-3.53067
TRMT13	0.23321	7.879e-17	2.2086	0.0290106	0.86841	-3.53551
SCAF4	0.197793	-3.11579e-16	2.2072	0.0291112	0.86841	-3.53754
NCSTN	0.217015	-1.07441e-16	2.20593	0.0292021	0.86841	-3.53936
ATXN1L	0.170612	5.73018e-17	2.20507	0.0292638	0.86841	-3.54059
MME	0.333235	-2.18463e-16	2.20501	0.0292681	0.86841	-3.54067
RPL23AP61	0.2035	1.50417e-16	2.20422	0.0293251	0.86841	-3.54181
TMEM69	0.270753	-3.25904e-16	2.20395	0.0293444	0.86841	-3.5422
ACSL5	0.366029	-2.86509e-17	2.20377	0.0293575	0.86841	-3.54246
DCUN1D4	0.199824	3.58136e-18	2.20347	0.0293789	0.86841	-3.54288
PXMP2	0.132494	2.72184e-16	2.20334	0.0293886	0.86841	-3.54307
SLC38A11	0.27486	1.41464e-16	2.20182	0.0294984	0.86841	-3.54525
RMI2	0.176583	-5.73018e-17	2.20177	0.029502	0.86841	-3.54532
GPR89B	0.243907	2.50696e-17	2.20117	0.0295451	0.86841	-3.54618
INTS8	0.330534	3.07997e-16	2.20082	0.0295709	0.86841	-3.54669
BAIAP2L1	0.33343	-2.00556e-16	2.20077	0.0295742	0.86841	-3.54675
RPSAP47	0.247869	3.36648e-16	2.20014	0.0296204	0.86841	-3.54766
ERVK13-1	0.311072	-2.43533e-16	2.20004	0.0296275	0.86841	-3.5478
APOBEC3H	0.149152	1.93394e-16	2.19985	0.0296411	0.86841	-3.54807
TMEM243	0.301513	-6.44646e-17	2.19963	0.0296572	0.86841	-3.54839
KRT18P60	0.221896	-3.58136e-18	2.19774	0.0297949	0.870012	-3.55109
PEX19	0.169414	-2.22045e-16	2.19728	0.0298285	0.870062	-3.55175
SRSF7	0.265466	-1.39673e-16	2.19597	0.0299246	0.871626	-3.55363
TMEM75	0.136055	1.36092e-16	2.19553	0.0299573	0.871626	-3.55426
IFRD1	0.200085	6.08832e-17	2.19521	0.0299807	0.871626	-3.55472
MEIS1-AS3	0.16754	-1.07441e-16	2.19418	0.0300562	0.872046	-3.55619
FGGY	0.226966	-8.95341e-17	2.19202	0.0302158	0.873575	-3.55928
TSC22D2	0.105927	2.86509e-17	2.19196	0.0302197	0.873575	-3.55935
IGHV3OR16-16	0.202332	4.26182e-16	2.19147	0.0302563	0.873575	-3.56006
ZNF487	0.147281	-1.71906e-16	2.19135	0.0302649	0.873575	-3.56022
DDX11L10	0.142866	1.43255e-16	2.18986	0.0303757	0.873678	-3.56235
FRG1BP	0.265499	1.46836e-16	2.18981	0.0303796	0.873678	-3.56243
RPS18P12	0.324547	2.65021e-16	2.18921	0.0304242	0.873678	-3.56328
RPL36AP13	0.200865	3.58136e-16	2.18739	0.03056	0.873678	-3.56588
MRPL18	0.233278	1.96975e-16	2.186	0.0306637	0.873678	-3.56786
LGALSL	0.234012	1.3251e-16	2.18589	0.0306716	0.873678	-3.56801
BTF3P5	0.197168	4.40508e-16	2.18464	0.0307656	0.873678	-3.56979
RPL23AP89	0.176526	1.3251e-16	2.18375	0.0308324	0.873678	-3.57106
GJD4	0.13463	-2.14882e-16	2.18283	0.0309019	0.873678	-3.57237
SNORD36C	0.32517	5.73018e-17	2.18278	0.0309056	0.873678	-3.57244
SLA2	0.131369	8.59528e-17	2.18073	0.0310609	0.873678	-3.57536
ZNF669	0.141874	-2.32789e-16	2.18048	0.0310798	0.873678	-3.57571
UBE2V1P11	0.263548	3.50974e-16	2.17996	0.0311193	0.873678	-3.57645
RPS26P24	0.142948	-7.16273e-17	2.17979	0.0311317	0.873678	-3.57669
UBE3D	0.138604	-1.14604e-16	2.17976	0.0311345	0.873678	-3.57674
BANF1P1	0.144703	1.07441e-17	2.17917	0.0311791	0.873678	-3.57757
MARCKSL1P2	0.139593	-1.71906e-16	2.17759	0.0312992	0.873678	-3.57981
STAMBP	0.191467	-1.50417e-16	2.17713	0.031334	0.873678	-3.58046
RPS7P8	0.166938	-3.72462e-16	2.1764	0.03139	0.873678	-3.5815
AHCTF1P1	0.195906	3.50974e-16	2.17594	0.0314256	0.873678	-3.58216
OSBPL6	0.137639	-2.14882e-17	2.17577	0.0314387	0.873678	-3.5824
UBE2C	0.210605	-1.43255e-16	2.17474	0.0315172	0.873678	-3.58386
ZHX3	0.145906	-1.21766e-16	2.17467	0.0315223	0.873678	-3.58395
MTCYBP4	0.136234	-8.95341e-17	2.17416	0.0315621	0.873678	-3.58469
CNIH4	0.406491	-2.97253e-16	2.17383	0.0315874	0.873678	-3.58515
SLC6A18	0.135866	-3.58136e-17	2.17342	0.0316184	0.873678	-3.58572
RRN3	0.157854	5.01391e-17	2.17321	0.031635	0.873678	-3.58603
MRPL20	0.195598	3.79625e-16	2.17291	0.031658	0.873678	-3.58645
ZDHHC9	0.255435	3.36648e-16	2.1718	0.0317433	0.873678	-3.58802
RNF165	0.169487	-1.18185e-16	2.17162	0.0317575	0.873678	-3.58828
OR7E158P	0.125236	1.50417e-16	2.17077	0.0318228	0.873678	-3.58948
DGKZP1	0.128685	4.26182e-16	2.17055	0.0318405	0.873678	-3.5898
VWA7	0.1472	-8.23714e-17	2.16759	0.0320697	0.874015	-3.59397
RPL35AP33	0.21406	4.08276e-16	2.16753	0.0320744	0.874015	-3.59406
RPL21P106	0.124621	-3.58136e-16	2.16704	0.0321127	0.874015	-3.59475
HSPD1P5	0.147158	-4.65577e-17	2.167	0.0321161	0.874015	-3.59482
S100A5	0.122999	8.59528e-17	2.16608	0.0321876	0.874015	-3.59611
STIP1P3	0.192928	-2.97253e-16	2.16467	0.0322982	0.874015	-3.59811
PROSER1	0.216917	-3.58136e-17	2.16423	0.0323329	0.874015	-3.59873
CCDC85A	0.138429	9.31155e-17	2.16342	0.0323961	0.874015	-3.59987
FAM102A	0.19093	-1.71906e-16	2.16337	0.0323999	0.874015	-3.59993
NIP7	0.203291	-2.72184e-16	2.16265	0.0324568	0.874015	-3.60096
HOMEZ	0.163372	3.9395e-16	2.16209	0.0325005	0.874015	-3.60174
TIAL1	0.198286	4.29764e-16	2.16152	0.0325454	0.874015	-3.60254
RAPGEF1	0.160482	2.68602e-16	2.1595	0.0327055	0.874015	-3.6054
PSAPL1	0.144568	-5.37205e-17	2.15798	0.0328262	0.874015	-3.60754
OR5P1P	0.139334	5.73018e-17	2.15734	0.0328771	0.874015	-3.60844
ACTR3B	0.174857	3.90369e-16	2.15688	0.0329133	0.874015	-3.60908
SLC25A5P4	0.136975	1.14604e-16	2.15667	0.0329307	0.874015	-3.60939
PATL1	0.215327	-2.6144e-16	2.15573	0.0330055	0.874015	-3.61071
MTCO3P28	0.169473	-1.52208e-16	2.15551	0.033023	0.874015	-3.61101
NUP58	0.243861	-3.07997e-16	2.15503	0.0330609	0.874015	-3.61168
CCT6P3	0.212975	-8.59528e-17	2.15502	0.0330623	0.874015	-3.61171
AIFM1	0.160899	5.01391e-17	2.15399	0.0331441	0.874015	-3.61314
LGALS8-AS1	0.147855	-8.77434e-17	2.15369	0.0331689	0.874015	-3.61358
MELK	0.236353	-8.59528e-17	2.15065	0.0334134	0.874015	-3.61784
FAM90A2P	0.162212	5.73018e-17	2.15049	0.0334258	0.874015	-3.61806
SDCBP2-AS1	0.147965	7.16273e-18	2.15038	0.033435	0.874015	-3.61822
RGMB	0.226287	1.8265e-16	2.15024	0.033446	0.874015	-3.61841
RPS5	0.19141	-7.0911e-16	2.14969	0.0334903	0.874015	-3.61918
GGA2	0.208299	-1.5758e-16	2.14821	0.0336106	0.874015	-3.62126
IGKV2OR22-4	0.150627	-4.29764e-16	2.14655	0.0337451	0.874015	-3.62358
RPL37P15	0.223185	-2.50696e-16	2.14645	0.0337533	0.874015	-3.62372
BRINP1	0.150485	-6.80459e-17	2.14627	0.0337682	0.874015	-3.62398
LYPLA2P3	0.118667	1.70115e-16	2.14585	0.0338024	0.874015	-3.62457
SALL4P1	0.149289	-3.9395e-17	2.14517	0.0338582	0.874015	-3.62553
CLYBL	0.167981	-1.5758e-16	2.14502	0.0338704	0.874015	-3.62574
KRTAP5-11	0.172952	-3.97531e-16	2.14434	0.0339257	0.874015	-3.62668
UBOX5	0.145215	8.59528e-17	2.14368	0.0339796	0.874015	-3.62761
FAHD2A	0.168818	-1.68324e-16	2.14224	0.0340976	0.874015	-3.62962
ATF6B	0.165841	-2.90091e-16	2.14171	0.034141	0.874015	-3.63036
ANXA2P3	0.15179	3.50974e-16	2.14156	0.0341539	0.874015	-3.63058
PUS7	0.224652	-1.00278e-16	2.13792	0.0344539	0.874015	-3.63565
OXNAD1	0.200439	8.23714e-17	2.1369	0.0345391	0.874015	-3.63709
SDHDP2	0.149363	-2.86509e-17	2.13675	0.0345509	0.874015	-3.63728
JUN	0.189169	-2.11301e-16	2.13622	0.0345952	0.874015	-3.63803
POLD3	0.19922	-1.21766e-16	2.13511	0.0346874	0.874015	-3.63957
RHOXF1P1	0.136119	1.28929e-16	2.13374	0.0348023	0.874015	-3.64149
AMH	0.122418	1.43255e-17	2.13355	0.0348178	0.874015	-3.64175
NACC1	0.200848	3.33067e-16	2.13335	0.0348345	0.874015	-3.64203
RPL35P3	0.181153	-2.72184e-16	2.13203	0.0349452	0.874015	-3.64387
SOHLH1	0.12315	-2.50696e-16	2.13098	0.0350335	0.874015	-3.64533
IGHV3OR16-12	0.154565	1.18185e-16	2.1308	0.0350482	0.874015	-3.64558
CACNG4	0.133285	1.64743e-16	2.13038	0.035084	0.874015	-3.64617
HSPD1P18	0.10871	-7.16273e-18	2.12979	0.0351333	0.874015	-3.64698
CHCHD3P3	0.152788	6.08832e-17	2.12863	0.0352316	0.874015	-3.6486
ZNF107	0.200014	4.65577e-17	2.12829	0.0352606	0.874015	-3.64908
ADCY10P1	0.243995	5.73018e-17	2.12797	0.0352873	0.874015	-3.64952
BZW2	0.167602	-2.86509e-17	2.12655	0.0354076	0.874015	-3.65149
UGGT2	0.257431	1.43255e-16	2.12587	0.0354657	0.874015	-3.65244
HJURP	0.316428	-1.79068e-16	2.12529	0.0355144	0.874015	-3.65324
EGFLAM	0.163911	-1.46836e-16	2.12517	0.0355252	0.874015	-3.65341
RPL36AP51	0.212211	-4.29764e-16	2.12381	0.0356406	0.874015	-3.65529
RPS3AP49	0.229946	-2.3637e-16	2.12367	0.0356531	0.874015	-3.65549
TPD52L1	0.254112	3.68881e-16	2.12339	0.035677	0.874015	-3.65588
CDPF1	0.112838	-4.29764e-17	2.12294	0.0357149	0.874015	-3.6565
ENPP7P7	0.12294	1.43255e-17	2.12057	0.0359178	0.874015	-3.65978
TTC22	0.19414	1.36092e-16	2.12026	0.035945	0.874015	-3.66022
RAD17P1	0.179902	8.95341e-17	2.11998	0.0359691	0.874015	-3.66061
ZNF737	0.25957	3.9395e-17	2.11971	0.0359921	0.874015	-3.66098
TMCO6	0.186823	2.79346e-16	2.11958	0.0360033	0.874015	-3.66116
DDX27	0.314708	1.96975e-16	2.11918	0.036038	0.874015	-3.66172
RPL29P2	0.161311	3.25904e-16	2.11896	0.0360563	0.874015	-3.66201
MTMR6	0.123331	1.18185e-16	2.11828	0.0361155	0.874015	-3.66296
OPRK1	0.12036	-5.01391e-17	2.11819	0.0361233	0.874015	-3.66309
SNORA57	0.169164	-1.14604e-16	2.11768	0.0361675	0.874015	-3.66379
SNORD20	0.288872	-8.23714e-17	2.11754	0.0361794	0.874015	-3.66399
SLC17A8	0.115259	-2.04138e-16	2.11736	0.0361946	0.874015	-3.66423
LAMTOR2	0.164641	3.29486e-16	2.11634	0.0362828	0.874015	-3.66564
METTL6	0.142347	4.47671e-17	2.11412	0.036476	0.874015	-3.66871
LCE2A	0.172191	-1.25348e-16	2.11408	0.0364795	0.874015	-3.66877
TMUB1	0.183299	2.11301e-16	2.11368	0.0365143	0.874015	-3.66932
ARPC1A	0.298535	3.18741e-16	2.11361	0.0365205	0.874015	-3.66942
RPL23AP87	0.12572	2.14882e-17	2.11278	0.0365926	0.874015	-3.67056
OR1B1	0.188454	1.86231e-16	2.11232	0.0366331	0.874015	-3.6712
TIMM9	0.285152	-4.65577e-17	2.1119	0.0366696	0.874015	-3.67178
RPL7P15	0.234187	-7.16273e-18	2.11154	0.0367013	0.874015	-3.67228
VDAC1	0.227984	-3.65299e-16	2.11002	0.0368341	0.874015	-3.67437
PEX2	0.116881	-1.25348e-16	2.10892	0.0369309	0.874015	-3.67589
ZNF467	0.135212	2.11301e-16	2.10879	0.0369429	0.874015	-3.67607
CDC16	0.178732	-4.65577e-17	2.10872	0.0369485	0.874015	-3.67616
SDAD1P3	0.128317	1.27138e-16	2.10811	0.037002	0.874015	-3.677
STAU1	0.235004	-7.16273e-17	2.10711	0.0370906	0.874015	-3.67838
PSMA2	0.255238	-1.71906e-16	2.10675	0.0371227	0.874015	-3.67888
UTP20	0.164495	8.95341e-17	2.10604	0.0371849	0.874015	-3.67985
RECQL4	0.13807	5.73018e-17	2.10455	0.0373176	0.874015	-3.68191
DPEP1	0.154868	5.01391e-17	2.10298	0.0374568	0.874015	-3.68407
HSPE1	0.412556	-8.16551e-16	2.10286	0.0374678	0.874015	-3.68424
CUL1	0.206492	-2.90091e-16	2.10203	0.0375416	0.874015	-3.68537
HNRNPA0	0.171603	2.29207e-16	2.10199	0.0375453	0.874015	-3.68543
KRT23	0.304425	4.29764e-16	2.10173	0.0375683	0.874015	-3.68578
BCAP31P1	0.120737	-2.86509e-17	2.10026	0.0376995	0.874015	-3.6878
LSM8	0.249807	7.16273e-18	2.09987	0.0377346	0.874015	-3.68834
RPL7P25	0.337762	-2.07719e-16	2.09923	0.0377923	0.874015	-3.68922
MORF4L2P1	0.13869	-1.34301e-16	2.09829	0.0378764	0.874015	-3.69051
CFAP61	0.101391	4.65577e-17	2.09828	0.0378773	0.874015	-3.69052
RPL15P3	0.188389	-2.3637e-16	2.09816	0.0378881	0.874015	-3.69069
ITGA4	0.114901	-4.29764e-16	2.09757	0.0379415	0.874015	-3.6915
HSPE1P4	0.168594	-8.23714e-17	2.09743	0.0379539	0.874015	-3.69169
FAM136A	0.182781	1.43255e-17	2.09621	0.0380643	0.874015	-3.69337
SMIM19	0.318691	-3.22323e-16	2.09436	0.0382313	0.874015	-3.6959
TBC1D31	0.167437	-9.66968e-17	2.09379	0.0382831	0.874015	-3.69668
LSM3	0.2253	-3.9395e-17	2.09316	0.0383402	0.874015	-3.69754
CYB5R4	0.176299	-1.43255e-17	2.09135	0.038505	0.874015	-3.70002
SMC3	0.335807	-3.76043e-16	2.09094	0.0385429	0.874015	-3.70059
RB1	0.200431	4.44089e-16	2.09078	0.038557	0.874015	-3.7008
TIFAB	0.17433	-1.61161e-16	2.0895	0.0386746	0.874015	-3.70256
HIBCH	0.240117	-2.50696e-17	2.08864	0.0387532	0.874015	-3.70373
PTCD1	0.179605	3.68881e-16	2.08734	0.0388727	0.874015	-3.70551
NIFKP2	0.123242	5.73018e-17	2.08653	0.0389466	0.874015	-3.7066
EIF4BP1	0.12092	2.14882e-16	2.08621	0.0389764	0.874015	-3.70705
IGLVIV-66-1	0.131607	-9.66968e-17	2.08608	0.0389885	0.874015	-3.70723
OFD1P7Y	0.127399	1.61161e-17	2.08543	0.0390483	0.874015	-3.70811
TXNP1	0.305516	1.71906e-16	2.08513	0.0390763	0.874015	-3.70852
COMMD6	0.393297	3.90369e-16	2.08494	0.0390936	0.874015	-3.70878
SH2D4B	0.140788	-4.08276e-16	2.08471	0.0391144	0.874015	-3.70909
CDX2	0.304075	4.1902e-16	2.0824	0.0393293	0.874015	-3.71225
STIP1	0.256795	1.71906e-16	2.08172	0.0393925	0.874015	-3.71317
YWHAQP5	0.126942	-1.37883e-16	2.08166	0.0393977	0.874015	-3.71325
CCNF	0.155567	1.18185e-16	2.08152	0.0394109	0.874015	-3.71345
FTLP15	0.126027	-5.19298e-17	2.08049	0.0395063	0.874015	-3.71484
MRPS18BP1	0.12049	-2.90091e-16	2.08014	0.0395391	0.874015	-3.71532
SHANK2	0.169455	3.22323e-17	2.07964	0.0395861	0.874015	-3.716
TPT1P4	0.1263	1.71906e-16	2.0793	0.0396176	0.874015	-3.71646
PRR20B	0.117815	-1.43255e-17	2.07908	0.0396383	0.874015	-3.71676
PRR20C	0.117815	-1.43255e-17	2.07908	0.0396383	0.874015	-3.71676
PRR20D	0.117815	-1.43255e-17	2.07908	0.0396383	0.874015	-3.71676
MS4A18	0.12971	9.49062e-17	2.07837	0.0397046	0.874015	-3.71773
CPPED1	0.144113	2.43533e-16	2.07636	0.0398931	0.874015	-3.72046
CLEC4A	0.232555	-3.22323e-17	2.07621	0.0399077	0.874015	-3.72067
RPL7L1P11	0.15035	-2.50696e-17	2.07589	0.0399378	0.874015	-3.72111
ANAPC10P1	0.166805	-3.83206e-16	2.07371	0.0401436	0.874015	-3.72407
ZNFX1	0.141403	3.9395e-16	2.07362	0.040152	0.874015	-3.72419
BRCA1	0.184318	-3.04416e-17	2.07253	0.0402547	0.874015	-3.72566
NDUFA2	0.230684	-4.08276e-16	2.07251	0.0402568	0.874015	-3.72569
C1QTNF1	0.148825	7.879e-17	2.07234	0.0402726	0.874015	-3.72592
CAB39L	0.286214	-2.86509e-17	2.07166	0.0403376	0.874015	-3.72685
VLDLR	0.140987	-5.55112e-17	2.07146	0.0403569	0.874015	-3.72712
SALL1P1	0.148414	1.45045e-16	2.07116	0.0403852	0.874015	-3.72753
RPS2P55	0.275515	-3.65299e-16	2.06957	0.0405361	0.874015	-3.72968
RASL11A	0.1845	1.07441e-17	2.06948	0.0405447	0.874015	-3.7298
ENO4	0.124719	-2.90091e-16	2.06825	0.0406618	0.874015	-3.73146
ZNF575	0.143377	2.93672e-16	2.06814	0.0406726	0.874015	-3.73162
TRBJ1-4	0.216508	-2.79346e-16	2.06772	0.0407131	0.874015	-3.73219
PRR23A	0.139164	-1.66533e-16	2.06754	0.0407301	0.874015	-3.73243
RPS2P5	0.268961	-1.00278e-16	2.06752	0.040732	0.874015	-3.73246
KRT8P32	0.137645	-2.00556e-16	2.06679	0.0408024	0.874015	-3.73345
PSMG1	0.38488	-1.21766e-16	2.06649	0.040831	0.874015	-3.73385
FTH1P11	0.228751	6.08832e-17	2.06581	0.0408965	0.874015	-3.73478
CCNJL	0.138462	5.37205e-18	2.06482	0.0409909	0.874015	-3.73611
RPL7P54	0.0928332	-5.73018e-17	2.06423	0.041048	0.874015	-3.73691
OR4M2	0.140995	-1.55789e-16	2.06408	0.0410626	0.874015	-3.73711
TRA2A	0.176825	3.1516e-16	2.0638	0.0410896	0.874015	-3.73749
MITD1	0.168065	3.22323e-17	2.06333	0.0411347	0.874015	-3.73812
UBE2WP1	0.134689	-1.5758e-16	2.06278	0.0411875	0.874015	-3.73886
ANKRD19P	0.148085	3.22323e-16	2.06232	0.0412321	0.874015	-3.73949
USP7	0.254674	-3.29486e-16	2.06199	0.0412642	0.874015	-3.73993
WWOX	0.210682	2.72184e-16	2.06156	0.0413055	0.874015	-3.74051
XRCC6P4	0.134716	1.8265e-16	2.06118	0.0413426	0.874015	-3.74103
PDSS1	0.344444	3.90369e-16	2.05966	0.0414904	0.874015	-3.74308
GSTK1	0.199961	5.01391e-17	2.05952	0.0415044	0.874015	-3.74328
ACTG1P18	0.142705	2.68602e-17	2.05898	0.0415567	0.874015	-3.744
ZNF800	0.213325	-3.47392e-16	2.05804	0.0416478	0.874015	-3.74526
KCNIP2-AS1	0.15846	1.86231e-16	2.05702	0.0417474	0.874015	-3.74664
MTATP6P9	0.107261	4.11857e-17	2.05635	0.0418131	0.874015	-3.74754
ND2	0.249393	-1.71906e-16	2.05621	0.0418274	0.874015	-3.74774
PIANP	0.117517	6.44646e-17	2.0562	0.0418276	0.874015	-3.74774
PRAMEF19	0.141474	-5.90925e-17	2.05575	0.0418723	0.874015	-3.74836
OGT	0.195478	1.5758e-16	2.05457	0.0419877	0.874015	-3.74994
EIF2S2	0.295137	-3.1516e-16	2.05449	0.0419954	0.874015	-3.75004
BUB1P1	0.129715	1.50417e-16	2.05423	0.0420212	0.874015	-3.7504
SULT1A2	0.153742	2.29207e-16	2.05334	0.0421088	0.874015	-3.75159
POMP	0.230781	-1.28929e-16	2.05283	0.0421589	0.874015	-3.75228
SNORD66	0.172326	9.31155e-17	2.05203	0.0422378	0.874015	-3.75335
KRT8P22	0.14359	1.46836e-16	2.05083	0.042357	0.874015	-3.75498
AKR1C5P	0.156801	-2.04138e-16	2.05023	0.0424163	0.874015	-3.75578
OBSCN	0.142433	-3.9395e-16	2.05013	0.0424265	0.874015	-3.75592
SLC4A1APP1	0.143352	-4.29764e-16	2.04973	0.0424662	0.874015	-3.75646
TRIM73	0.15443	-1.21766e-16	2.04954	0.0424844	0.874015	-3.7567
YWHAZP2	0.228634	1.61161e-16	2.04938	0.0425001	0.874015	-3.75692
CNFN	0.131307	2.47114e-16	2.0492	0.0425184	0.874015	-3.75716
TGFBR3	0.224332	1.5758e-16	2.04891	0.0425468	0.874015	-3.75755
RPF2	0.274486	1.89812e-16	2.04801	0.0426366	0.874015	-3.75876
HBP1	0.307848	3.97531e-16	2.04776	0.0426614	0.874015	-3.75909
CLEC16A	0.130311	1.5758e-16	2.04735	0.0427025	0.874015	-3.75965
CYB5B	0.313618	7.52087e-17	2.04589	0.0428481	0.874015	-3.7616
HSPE1P2	0.267903	4.15438e-16	2.04576	0.0428616	0.874015	-3.76178
FAM90A26	0.13533	-2.50696e-16	2.04566	0.0428706	0.874015	-3.76191
CYP3A54P	0.145624	-8.59528e-17	2.04526	0.0429115	0.874015	-3.76245
ZNF81	0.178554	-1.41464e-16	2.04452	0.0429852	0.874015	-3.76344
DPY19L1P1	0.210879	-7.16273e-17	2.04439	0.0429981	0.874015	-3.76361
NDUFA4	0.313692	-7.16273e-18	2.04253	0.0431852	0.874015	-3.76611
UNC13B	0.152645	1.79068e-16	2.04236	0.0432018	0.874015	-3.76633
IGLCOR22-1	0.15035	1.14604e-16	2.0419	0.0432482	0.874015	-3.76695
FRMD6-AS2	0.144238	1.95184e-16	2.04182	0.0432566	0.874015	-3.76706
SNRPB	0.12593	3.65299e-16	2.04118	0.0433209	0.874015	-3.76791
MTND2P20	0.144973	-3.33067e-16	2.04086	0.0433537	0.874015	-3.76835
PMS2P7	0.230451	-1.36092e-16	2.04081	0.0433585	0.874015	-3.76841
KRTAP10-5	0.142026	-3.58136e-16	2.04077	0.0433626	0.874015	-3.76846
RPL32P34	0.122272	-2.72184e-16	2.04059	0.0433811	0.874015	-3.76871
MROH4P	0.129772	-1.43255e-17	2.04025	0.0434151	0.874015	-3.76916
GNL3	0.268907	2.00556e-16	2.03868	0.043574	0.874015	-3.77126
C1QBP	0.224778	-4.29764e-17	2.03858	0.0435844	0.874015	-3.77139
SOX15	0.122037	-3.22323e-16	2.03823	0.0436193	0.874015	-3.77185
TBR1	0.154645	-1.61161e-16	2.0378	0.043663	0.874015	-3.77243
ARHGAP22	0.138061	4.65577e-17	2.03661	0.0437847	0.874015	-3.77403
FABP5P2	0.187699	1.07441e-16	2.03634	0.0438124	0.874015	-3.77439
OR14A16	0.125338	1.11022e-16	2.03581	0.0438663	0.874015	-3.7751
PA2G4P3	0.194608	6.26739e-17	2.03193	0.0442635	0.874015	-3.78027
SLC36A2	0.138613	6.80459e-17	2.03193	0.0442637	0.874015	-3.78027
TELO2	0.12013	-1.5758e-16	2.03115	0.044344	0.874015	-3.78131
SNORA5C	0.184425	3.00835e-16	2.03054	0.0444061	0.874015	-3.78212
SHD	0.11861	-2.32789e-16	2.02903	0.0445617	0.874015	-3.78412
VN1R3	0.11056	4.65577e-17	2.02846	0.0446213	0.874015	-3.78489
HMGB1P26	0.13843	-1.39673e-16	2.02842	0.0446251	0.874015	-3.78494
FAM138F	0.126976	2.75765e-16	2.02666	0.0448077	0.874015	-3.78728
DNAJC30	0.146879	3.29486e-16	2.02612	0.0448638	0.874015	-3.788
CPNE2	0.198733	1.3251e-16	2.02607	0.044869	0.874015	-3.78807
BRIP1	0.168169	-2.32789e-16	2.02585	0.0448917	0.874015	-3.78836
WWP1P1	0.194222	-3.18741e-16	2.02527	0.0449524	0.874015	-3.78913
PWP1	0.157872	3.43811e-16	2.02513	0.0449666	0.874015	-3.78931
SNRPGP3	0.135393	-2.22045e-16	2.02505	0.0449754	0.874015	-3.78943
STAG3L2	0.149401	-3.65299e-16	2.0249	0.0449908	0.874015	-3.78962
IGHV3-36	0.119951	3.72462e-16	2.0241	0.0450737	0.874015	-3.79068
TBC1D22B	0.173423	1.89812e-16	2.02386	0.0450995	0.874015	-3.79101
EEF1B2P7	0.158033	1.93394e-16	2.02365	0.0451214	0.874015	-3.79128
MAPK13	0.120497	-1.86231e-16	2.02357	0.0451297	0.874015	-3.79139
TNP1	0.168616	2.22045e-16	2.0228	0.0452097	0.874015	-3.7924
ZNF274	0.145017	1.64743e-16	2.02267	0.0452235	0.874015	-3.79258
RANP1	0.239853	-4.1902e-16	2.02052	0.0454493	0.874015	-3.79544
NUFIP1	0.243907	-3.4023e-16	2.02045	0.045457	0.874015	-3.79553
PPIAP22	0.204563	7.52087e-17	2.02006	0.0454981	0.874015	-3.79605
WAC	0.292561	8.81016e-16	2.0199	0.0455149	0.874015	-3.79626
TRBV6-6	0.127569	-1.36092e-16	2.01984	0.0455206	0.874015	-3.79633
GAPDHP33	0.137422	-2.14882e-17	2.01833	0.04568	0.874015	-3.79834
OR7E109P	0.16739	-1.62952e-16	2.01609	0.0459171	0.874015	-3.8013
LHCGR	0.147177	-1.79068e-16	2.01532	0.0459987	0.874015	-3.80232
EEF1A1P19	0.211791	4.15438e-16	2.01492	0.0460415	0.874015	-3.80285
UQCRC2	0.305932	6.80459e-17	2.01463	0.0460719	0.874015	-3.80323
CDH1	0.295858	-2.3637e-16	2.01441	0.046095	0.874015	-3.80352
OR10J3	0.124156	6.80459e-17	2.01377	0.0461641	0.874015	-3.80438
RPF2P1	0.129852	1.21766e-16	2.01351	0.0461918	0.874015	-3.80472
STEAP1B	0.155476	-1.3251e-16	2.01336	0.0462078	0.874015	-3.80492
RPS14P8	0.203141	4.01113e-16	2.01321	0.0462238	0.874015	-3.80512
PRELID3B	0.241275	3.18741e-16	2.01313	0.046232	0.874015	-3.80522
CD38	0.138176	4.65577e-17	2.01211	0.0463403	0.874015	-3.80656
EMD	0.172894	2.3637e-16	2.01198	0.0463551	0.874015	-3.80674
USP12	0.222357	1.3251e-16	2.01163	0.0463916	0.874015	-3.80719
KLHL18	0.136642	-6.44646e-17	2.01157	0.0463981	0.874015	-3.80727
MATN4	0.12025	-1.00278e-16	2.01099	0.0464605	0.874015	-3.80804
OR52A4P	0.173292	-1.14604e-16	2.01092	0.0464682	0.874015	-3.80814
RPL12P32	0.11932	3.65299e-16	2.01061	0.0465016	0.874015	-3.80855
RPS23	0.304208	5.44367e-16	2.01039	0.0465254	0.874015	-3.80884
TMEM231	0.149581	2.54277e-16	2.01016	0.0465491	0.874015	-3.80913
FKSG29	0.252495	-2.32789e-16	2.00969	0.0466004	0.874015	-3.80976
RNF8	0.249533	1.14604e-16	2.00945	0.0466253	0.874015	-3.81007
HMGN2P26	0.150838	6.44646e-17	2.00891	0.046684	0.874015	-3.81079
RPS24P16	0.117509	2.43533e-16	2.00868	0.0467091	0.874015	-3.8111
KCNE3	0.160503	1.07441e-17	2.00828	0.0467514	0.874015	-3.81161
RDM1	0.160948	-1.5758e-16	2.00815	0.0467653	0.874015	-3.81179
IFT172	0.166603	3.58136e-18	2.00747	0.0468395	0.874015	-3.81269
TRMO	0.276791	3.29486e-16	2.00742	0.0468441	0.874015	-3.81275
NAV2-AS3	0.158838	-2.02347e-16	2.0074	0.0468467	0.874015	-3.81278
VRTN	0.110278	-1.3251e-16	2.00573	0.0470273	0.874015	-3.81498
B4GALT1-AS1	0.204628	-6.80459e-17	2.00424	0.0471888	0.874015	-3.81694
TMBIM7P	0.120687	1.79068e-17	2.00415	0.0471986	0.874015	-3.81706
IGHV3-50	0.128025	-4.40508e-16	2.00348	0.047271	0.874015	-3.81794
SNORD12C	0.25192	5.73018e-16	2.00343	0.0472761	0.874015	-3.818
RPL12P6	0.142771	-6.80459e-17	2.00327	0.0472934	0.874015	-3.81821
RIIAD1	0.151306	-1.71906e-16	2.00268	0.0473581	0.874015	-3.81899
ANKRD24	0.141138	2.29207e-16	2.00192	0.0474405	0.874015	-3.81999
NPM1P48	0.0998125	-3.58136e-17	2.00185	0.0474487	0.874015	-3.82009
NUP93	0.154443	-3.58136e-16	2.00111	0.0475295	0.874015	-3.82106
KDM5C-IT1	0.14934	-3.9395e-17	2.00095	0.0475469	0.874015	-3.82127
TFEB	0.146575	4.65577e-17	1.9999	0.0476614	0.874015	-3.82264
OR11K1P	0.148418	-1.07441e-17	1.99978	0.0476743	0.874015	-3.8228
NOL8	0.241102	3.58136e-18	1.99964	0.0476899	0.874015	-3.82299
IFNA7	0.104644	5.90925e-17	1.99941	0.0477148	0.874015	-3.82328
CCNL1	0.184616	2.50696e-16	1.9987	0.047793	0.874015	-3.82422
C4orf48	0.135733	-1.89812e-16	1.99853	0.0478119	0.874015	-3.82445
RPS7P1	0.285215	-4.15438e-16	1.99731	0.0479453	0.874015	-3.82604
SESN2	0.133574	-2.75765e-16	1.99483	0.0482198	0.874015	-3.8293
SBDS	0.304162	-1.07441e-17	1.99445	0.0482613	0.874015	-3.82979
PBX4	0.144628	-3.07997e-16	1.99303	0.0484187	0.874015	-3.83165
RPS4XP21	0.161731	1.8444e-16	1.99268	0.0484575	0.874015	-3.83211
C2orf49	0.172066	-6.44646e-17	1.99252	0.0484754	0.874015	-3.83232
OTX2P1	0.121283	1.18185e-16	1.99219	0.0485117	0.874015	-3.83275
SAC3D1	0.114041	-1.50417e-16	1.99177	0.0485583	0.874015	-3.8333
SMIM12	0.169132	-2.22045e-16	1.99173	0.0485625	0.874015	-3.83335
MTCYBP18	0.157015	-5.37205e-17	1.99156	0.0485823	0.874015	-3.83358
NARS2	0.135994	2.11301e-16	1.99069	0.0486791	0.874015	-3.83472
RPSAP11	0.162225	-2.04138e-16	1.99048	0.0487023	0.874015	-3.83499
ARL6IP1P1	0.123221	-7.52087e-17	1.99022	0.048731	0.874015	-3.83533
HMGB1P41	0.126171	-6.08832e-17	1.99009	0.0487461	0.874015	-3.83551
ZNF93	0.164337	2.07719e-16	1.98914	0.048852	0.874015	-3.83674
GPR160	0.363109	5.73018e-17	1.98844	0.0489305	0.874015	-3.83766
ICAM5	0.153723	-2.72184e-16	1.98735	0.049052	0.874015	-3.83908
HLA-DQA2	0.187199	4.33345e-16	1.98714	0.0490762	0.874015	-3.83936
BCL10	0.189735	-1.21766e-16	1.9871	0.0490808	0.874015	-3.83941
RPL7P59	0.213561	1.93394e-16	1.98681	0.0491127	0.874015	-3.83978
HPS5	0.137568	-1.68324e-16	1.98621	0.0491802	0.874015	-3.84057
ESCO2	0.182534	3.04416e-17	1.98597	0.0492076	0.874015	-3.84089
MRGPRX1	0.152006	-1.50417e-16	1.98573	0.0492339	0.874015	-3.84119
IKZF5	0.151486	-1.21766e-16	1.98504	0.049312	0.874015	-3.8421
GSC2	0.138976	5.37205e-17	1.98502	0.0493145	0.874015	-3.84213
PRELID3BP3	0.163882	1.75487e-16	1.98428	0.0493972	0.874015	-3.84308
CAMTA1-IT1	0.109081	2.00556e-16	1.9839	0.0494409	0.874015	-3.84359
THEGL	0.15913	-1.46836e-16	1.98367	0.0494666	0.874015	-3.84388
B2M	0.303184	2.79346e-16	1.98362	0.0494725	0.874015	-3.84395
RPS4XP6	0.163492	-3.50974e-16	1.98332	0.0495059	0.874015	-3.84434
RPF2P2	0.111514	1.25348e-16	1.98263	0.0495841	0.874015	-3.84524
ZNF789	0.0990755	2.86509e-17	1.98218	0.0496356	0.874015	-3.84583
HMGB1P30	0.114412	1.23557e-16	1.98214	0.0496393	0.874015	-3.84587
ZNF12	0.197732	-1.79068e-17	1.98166	0.0496947	0.874015	-3.84651
TYSND1	0.195776	3.11579e-16	1.98097	0.0497722	0.874015	-3.8474
MMEL1	0.133349	1.11022e-16	1.98051	0.0498251	0.874015	-3.848
CALM1P2	0.15518	-8.77434e-17	1.98024	0.0498559	0.874015	-3.84836
CSTP2	0.154408	-6.44646e-17	1.97966	0.0499212	0.874015	-3.8491
RPL37P3	0.122433	6.44646e-17	1.97966	0.0499214	0.874015	-3.84911
RPS3AP47	0.194139	-3.00835e-16	1.97944	0.0499459	0.874015	-3.84939
BEND3P1	0.11561	-1.36092e-16	1.97937	0.0499542	0.874015	-3.84948
OR5AN1	0.11545	-8.95341e-18	1.97841	0.0500644	0.874015	-3.85074
GTF2IRD1	0.165301	-8.95341e-17	1.97811	0.0500986	0.874015	-3.85113
PRRG2	0.141674	2.57858e-16	1.9776	0.0501566	0.874015	-3.85179
RPL7P10	0.131791	-3.43811e-16	1.97647	0.050286	0.874015	-3.85326
RPS13P2	0.226071	4.29764e-16	1.97586	0.0503555	0.874015	-3.85404
MRM1	0.175018	-2.07719e-16	1.97507	0.0504465	0.874015	-3.85507
TSPAN4	0.147987	1.71906e-16	1.9749	0.0504658	0.874015	-3.85529
RFWD3	0.119653	-1.8265e-16	1.97458	0.0505025	0.874015	-3.85571
OR2D3	0.106656	8.59528e-17	1.97424	0.0505415	0.874015	-3.85615
DLEU2	0.345208	6.80459e-17	1.97374	0.050599	0.874015	-3.85679
CKS1BP7	0.244034	-3.43811e-16	1.97323	0.050658	0.874015	-3.85746
SMLR1	0.131359	7.69993e-17	1.97301	0.0506837	0.874015	-3.85775
SYPL1	0.180262	-2.04138e-16	1.9728	0.0507073	0.874015	-3.85801
BOLA2B	0.225838	1.00278e-16	1.97264	0.0507257	0.874015	-3.85822
ARL6IP1	0.190756	-6.44646e-17	1.97263	0.0507272	0.874015	-3.85824
RPS3AP54	0.14207	1.86231e-16	1.97259	0.0507314	0.874015	-3.85828
TIGD1	0.118443	-3.47392e-16	1.97216	0.0507818	0.874015	-3.85885
COX7A2P2	0.194293	2.25626e-16	1.97181	0.0508217	0.874015	-3.8593
HMGB1	0.277846	-5.37205e-16	1.97173	0.0508316	0.874015	-3.85941
BCDIN3D	0.121191	2.86509e-16	1.97143	0.050866	0.874015	-3.85979
RPL7P11	0.120982	2.25626e-16	1.97128	0.0508838	0.874015	-3.85999
RPS23P8	0.352043	2.22045e-16	1.971	0.0509161	0.874015	-3.86036
SNAP47	0.1462	2.07719e-16	1.97092	0.0509247	0.874015	-3.86045
NOM1	0.124028	-3.25904e-16	1.97082	0.0509362	0.874015	-3.86058
MRPL52	0.186275	5.01391e-17	1.97079	0.0509398	0.874015	-3.86062
KRT18P7	0.129304	-3.4023e-16	1.9703	0.0509971	0.874015	-3.86126
IGLV3-10	0.199229	8.59528e-17	1.97024	0.0510039	0.874015	-3.86134
TIMM8BP1	0.20182	3.07997e-16	1.97006	0.0510251	0.874015	-3.86157
GGTA2P	0.121773	9.31155e-17	1.96956	0.0510824	0.874015	-3.86221
CDKN3	0.368741	-3.07997e-16	1.96922	0.0511222	0.874015	-3.86266
CABIN1	0.130382	-2.79346e-16	1.96885	0.0511648	0.874015	-3.86313
EZH2	0.265649	1.36092e-16	1.96843	0.0512145	0.874015	-3.86369
RPL23AP71	0.136088	-2.43533e-16	1.96818	0.0512436	0.874015	-3.86401
HSP90AA6P	0.154226	-6.62552e-17	1.96749	0.0513234	0.874015	-3.8649
RPS23P6	0.137364	-2.86509e-17	1.96727	0.0513491	0.874015	-3.86518
NEU1	0.208927	-4.44089e-16	1.9672	0.0513575	0.874015	-3.86527
CYCSP42	0.162379	-1.43255e-16	1.96712	0.0513667	0.874015	-3.86538
GFRA3	0.124758	-2.86509e-17	1.96585	0.0515146	0.874015	-3.86701
PSMA7	0.183898	2.07719e-16	1.96581	0.0515202	0.874015	-3.86707
OR51G1	0.119751	1.53999e-16	1.96502	0.0516117	0.874015	-3.86809
HSPD1	0.199167	3.43811e-16	1.96466	0.0516546	0.874015	-3.86856
CTNNBL1	0.223492	-2.93672e-16	1.96412	0.0517174	0.874015	-3.86925
OGFR-AS1	0.134977	-7.16273e-17	1.96377	0.0517592	0.874015	-3.86971
USP6NL	0.17943	-5.01391e-17	1.96286	0.0518661	0.874015	-3.87089
RUVBL2	0.125211	-2.32789e-16	1.96184	0.0519861	0.874015	-3.8722
EFCAB14P1	0.167638	-4.29764e-17	1.96107	0.0520771	0.874015	-3.8732
RPSAP12	0.186526	1.43255e-16	1.961	0.0520852	0.874015	-3.87329
IGHV3-73	0.152281	-1.61161e-16	1.96069	0.0521212	0.874015	-3.87368
FHIT	0.134432	-1.07441e-17	1.96036	0.0521606	0.874015	-3.87411
STRBP	0.240001	-3.07997e-16	1.95993	0.0522116	0.874015	-3.87466
KRT125P	0.0987685	-1.36092e-16	1.95931	0.0522842	0.874015	-3.87546
CDKN2AIP	0.164069	-1.86231e-16	1.95797	0.0524439	0.874015	-3.87719
CBX3P1	0.141414	4.29764e-17	1.95667	0.052598	0.874015	-3.87886
ZCCHC14	0.114194	1.21766e-16	1.95663	0.0526022	0.874015	-3.87891
IGKV1D-43	0.13166	-2.79346e-16	1.95641	0.0526286	0.874015	-3.87919
SNORD1B	0.224901	-2.07719e-16	1.95591	0.0526881	0.874015	-3.87983
OR2A4	0.213109	1.61161e-16	1.95577	0.0527052	0.874015	-3.88002
CACYBP	0.322984	1.43255e-16	1.95572	0.0527117	0.874015	-3.88009
POLRMT	0.136322	6.98366e-17	1.95484	0.0528166	0.874015	-3.88122
AKR1A1	0.265381	3.83206e-16	1.95481	0.0528201	0.874015	-3.88126
NDUFV3	0.209043	2.57858e-16	1.9548	0.0528215	0.874015	-3.88127
ANOS2P	0.152951	1.25348e-17	1.95368	0.0529545	0.874015	-3.8827
SFPQ	0.197242	-1.21766e-16	1.95354	0.0529722	0.874015	-3.88289
PHF20	0.21664	2.93672e-16	1.95247	0.0530994	0.874015	-3.88426
CEACAM22P	0.123952	1.07441e-16	1.95217	0.0531356	0.874015	-3.88464
RPS2P4	0.10956	1.86231e-16	1.95115	0.0532579	0.874015	-3.88595
TBL1YP1	0.121752	-1.79068e-17	1.95099	0.0532772	0.874015	-3.88616
IGHV1-18	0.169862	-8.23714e-17	1.95089	0.0532893	0.874015	-3.88629
RNF157-AS1	0.113869	-1.75487e-16	1.95018	0.0533754	0.874015	-3.8872
PRKDC	0.138302	-1.5758e-16	1.95015	0.0533784	0.874015	-3.88724
SPATA31E2P	0.102449	-4.65577e-17	1.94987	0.053413	0.874015	-3.8876
LTV1	0.140899	2.93672e-16	1.94951	0.0534561	0.874015	-3.88806
URI1	0.270861	2.32789e-16	1.94915	0.0534997	0.874015	-3.88853
NHEG1	0.134896	8.95341e-17	1.94905	0.0535111	0.874015	-3.88865
SLC35A3	0.228715	3.36648e-16	1.94871	0.0535529	0.874015	-3.88909
PFN1P9	0.134137	1.73696e-16	1.94856	0.0535707	0.874015	-3.88928
TMEM120B	0.135052	-3.68881e-16	1.94846	0.0535827	0.874015	-3.88941
SNX5	0.260854	4.29764e-16	1.94832	0.0536002	0.874015	-3.88959
MYLKP1	0.149058	6.08832e-17	1.94726	0.0537275	0.874015	-3.89094
TTC23L	0.114882	5.19298e-17	1.94631	0.0538438	0.874015	-3.89217
RNPS1	0.216605	9.31155e-17	1.94629	0.0538452	0.874015	-3.89218
DNAH6	0.149668	-2.04138e-16	1.94606	0.0538737	0.874015	-3.89249
MAP2K4P1	0.1265	-4.47671e-17	1.94593	0.0538899	0.874015	-3.89266
RNF216P1	0.190173	-2.07719e-16	1.94588	0.0538955	0.874015	-3.89272
ECI1	0.107994	-3.9395e-16	1.94536	0.0539583	0.874015	-3.89338
DIMT1	0.154054	3.58136e-17	1.94467	0.0540428	0.874015	-3.89427
MICG	0.130329	4.29764e-16	1.94364	0.0541681	0.874015	-3.89558
RPL12P33	0.172231	-1.86231e-16	1.94359	0.0541745	0.874015	-3.89565
RPL8P2	0.131085	-3.50974e-16	1.9434	0.0541971	0.874015	-3.89589
TSTD2	0.130592	-1.8265e-16	1.94333	0.0542062	0.874015	-3.89598
RPS4XP11	0.205264	-1.14604e-16	1.94332	0.0542071	0.874015	-3.89599
FAM207CP	0.115388	-6.44646e-17	1.94288	0.0542604	0.874015	-3.89655
ARPC4	0.164881	2.6144e-16	1.94247	0.0543109	0.874015	-3.89708
GDPD3	0.218494	-3.86787e-16	1.94246	0.0543127	0.874015	-3.89709
CYC1	0.271743	3.04416e-16	1.94218	0.0543468	0.874015	-3.89745
CHERP	0.112403	1.79068e-16	1.94215	0.0543502	0.874015	-3.89749
OR9G2P	0.129714	9.31155e-17	1.94193	0.0543769	0.874015	-3.89777
NOL10	0.194069	0	1.94137	0.0544452	0.874015	-3.89848
TMEM126A	0.304034	2.39951e-16	1.94108	0.0544817	0.874015	-3.89886
TNPO1P2	0.144399	2.11301e-16	1.9407	0.054528	0.874015	-3.89934
TCP1P1	0.16002	-7.879e-17	1.94037	0.054569	0.874015	-3.89977
TYRL	0.123281	1.93394e-16	1.9391	0.0547247	0.874015	-3.90139
ITGA9	0.143193	1.46836e-16	1.9386	0.0547864	0.874015	-3.90203
IL22RA1	0.25438	-1.07441e-16	1.93832	0.0548201	0.874015	-3.90238
ADAM11	0.116489	-8.95341e-17	1.93783	0.054881	0.874015	-3.903
SEPHS1	0.163871	8.05807e-17	1.93777	0.0548879	0.874015	-3.90308
TOMM20P4	0.13523	1.71906e-16	1.93754	0.0549168	0.874015	-3.90337
DPY30	0.188608	-2.79346e-16	1.93749	0.0549231	0.874015	-3.90344
MXI1	0.240468	9.31155e-17	1.93635	0.055064	0.874015	-3.90489
LYPLA1	0.232367	-1.14604e-16	1.93625	0.0550761	0.874015	-3.90502
MRPL15P1	0.10226	-3.58136e-17	1.93618	0.0550846	0.874015	-3.90511
BAIAP2	0.142089	1.0386e-16	1.93607	0.0550981	0.874015	-3.90525
MYC	0.282026	-3.43811e-16	1.93423	0.0553266	0.874015	-3.90759
THRA	0.222992	-7.16273e-17	1.93412	0.0553402	0.874015	-3.90773
BUD31	0.227262	-4.65577e-17	1.93409	0.0553446	0.874015	-3.90778
RER1	0.166213	-1.0386e-16	1.93392	0.0553646	0.874015	-3.90798
ZNHIT1	0.21321	-4.29764e-16	1.93386	0.0553723	0.874015	-3.90806
ZMYND8	0.28589	-1.50417e-16	1.93377	0.0553843	0.874015	-3.90819
TCF19	0.158619	-3.58136e-18	1.93277	0.0555079	0.874015	-3.90945
HCG9	0.118287	2.57858e-16	1.9326	0.0555293	0.874015	-3.90967
SLCO5A1	0.184145	3.83206e-16	1.93168	0.0556443	0.874015	-3.91084
FARS2	0.140117	-3.54555e-16	1.93135	0.0556854	0.874015	-3.91126
SNORD119	0.27094	1.80859e-16	1.93122	0.0557015	0.874015	-3.91142
SLC29A1	0.198076	2.32789e-17	1.93098	0.0557316	0.874015	-3.91173
ATAD1	0.221681	-2.07719e-16	1.93003	0.0558498	0.874015	-3.91293
CCDC34	0.206995	-2.86509e-17	1.92978	0.0558817	0.874015	-3.91326
LGALS8	0.164006	1.61161e-16	1.92885	0.0559986	0.874015	-3.91444
ABCC6	0.138063	2.86509e-17	1.92875	0.0560103	0.874015	-3.91456
TUBGCP3	0.170782	-4.01113e-16	1.9277	0.0561425	0.874015	-3.9159
UGT2B24P	0.123225	-8.95341e-18	1.92631	0.0563173	0.874015	-3.91766
VPS37D	0.139468	1.50417e-16	1.92573	0.0563906	0.874015	-3.91839
DNAJC11	0.232766	5.37205e-18	1.92572	0.0563918	0.874015	-3.91841
MYO1F	0.216044	-1.53999e-16	1.92509	0.0564719	0.874015	-3.91921
TRMT10C	0.189859	-1.62952e-16	1.9242	0.0565843	0.874015	-3.92034
ZFAND2A	0.183395	1.00278e-16	1.92346	0.0566777	0.874015	-3.92127
HOOK1	0.260312	-3.65299e-16	1.92295	0.0567428	0.874015	-3.92192
SLC9A3	0.156829	-4.29764e-17	1.9225	0.0568002	0.874015	-3.9225
MKNK2P1	0.131199	2.86509e-17	1.92209	0.0568517	0.874015	-3.92301
CCL14	0.158846	3.97531e-16	1.92162	0.0569122	0.874015	-3.92361
VN1R108P	0.155022	7.16273e-17	1.9215	0.056927	0.874015	-3.92376
DUX4L13	0.143193	1.5758e-16	1.92139	0.0569404	0.874015	-3.92389
TMEM41B	0.142904	3.58136e-17	1.92081	0.0570145	0.874015	-3.92463
ABCC6P2	0.140318	-2.43533e-16	1.92067	0.0570331	0.874015	-3.92481
CD2	0.186234	-1.25348e-17	1.91854	0.0573053	0.874015	-3.92751
HFE	0.11095	-3.58136e-18	1.91852	0.0573074	0.874015	-3.92753
TMEM14C	0.235323	4.1902e-16	1.91799	0.0573755	0.874015	-3.9282
RRP7BP	0.148142	-1.18185e-16	1.91793	0.0573831	0.874015	-3.92828
SLC25A33	0.17012	9.31155e-17	1.91787	0.0573902	0.874015	-3.92835
GS1-124K5.11	0.19175	3.58136e-16	1.91769	0.057414	0.874015	-3.92858
HBS1L	0.263563	4.1902e-16	1.9166	0.0575535	0.874015	-3.92996
SLC25A39	0.116132	-1.11022e-16	1.91595	0.0576363	0.874015	-3.93077
SRP9P1	0.178902	1.18185e-16	1.91595	0.0576363	0.874015	-3.93077
GID8	0.150849	-1.21766e-16	1.91546	0.0576998	0.874015	-3.93139
UNC93B2	0.117546	-3.04416e-16	1.91537	0.057712	0.874015	-3.93151
PMPCB	0.189245	-3.22323e-17	1.9152	0.0577338	0.874015	-3.93173
TM2D3	0.237236	1.0386e-16	1.91502	0.0577571	0.874015	-3.93196
DUSP19	0.116506	6.26739e-17	1.91467	0.0578022	0.874015	-3.9324
VIT	0.122034	2.18463e-16	1.91465	0.0578036	0.874015	-3.93241
KRTAP10-6	0.127573	4.65577e-17	1.91195	0.0581526	0.874015	-3.93582
CBWD3	0.209139	2.3637e-16	1.91041	0.0583523	0.874015	-3.93776
PNMT	0.10474	1.86231e-16	1.90991	0.0584184	0.874015	-3.9384
LMTK2	0.204618	-3.86787e-16	1.90962	0.0584561	0.874015	-3.93876
MPHOSPH9	0.161157	-1.89812e-16	1.90895	0.0585421	0.874015	-3.93959
VHL	0.109857	3.65299e-16	1.90813	0.0586494	0.874015	-3.94063
POU5F1P7	0.106616	-5.01391e-17	1.90723	0.058767	0.874015	-3.94176
NPIPB4	0.363292	-3.1516e-16	1.9071	0.0587838	0.874015	-3.94192
RPL23AP37	0.215614	-1.36092e-16	1.90697	0.0588015	0.874015	-3.94209
EIF5B	0.181056	-4.29764e-16	1.90662	0.0588469	0.874015	-3.94253
RPL7	0.317661	-7.16273e-17	1.90658	0.0588524	0.874015	-3.94258
PVT1	0.269438	-2.14882e-16	1.90635	0.0588818	0.874015	-3.94286
SCNM1	0.121161	-3.11579e-16	1.90632	0.0588861	0.874015	-3.94291
EEF1GP3	0.154944	-2.14882e-16	1.90577	0.0589582	0.874015	-3.9436
PRELID2	0.161376	2.29207e-16	1.90547	0.0589977	0.874015	-3.94397
RPL7P1	0.27549	1.64743e-16	1.90546	0.0589993	0.874015	-3.94399
OR4D8P	0.123535	2.32789e-17	1.9033	0.0592825	0.874015	-3.9467
EEF1B2P3	0.235371	4.58415e-16	1.90208	0.0594435	0.874015	-3.94823
ABHD8	0.0856979	1.50417e-16	1.90121	0.0595589	0.874015	-3.94932
HACD2	0.343639	7.52087e-17	1.90103	0.0595816	0.874015	-3.94954
HUNK	0.215742	-1.16394e-16	1.9009	0.0595988	0.874015	-3.9497
CNBD2	0.156603	-6.08832e-17	1.90075	0.0596184	0.874015	-3.94989
FOXL2	0.121999	6.44646e-17	1.9007	0.0596252	0.874015	-3.94995
NPM1P43	0.126247	-7.3418e-17	1.90066	0.0596313	0.874015	-3.95001
EPSTI1	0.28934	2.00556e-16	1.90002	0.0597159	0.874015	-3.95081
RPS2P28	0.111768	-3.90369e-16	1.89941	0.0597958	0.874015	-3.95157
CCHCR1	0.129682	-2.14882e-17	1.89893	0.05986	0.874015	-3.95217
LSMEM1	0.230523	2.39951e-16	1.89859	0.0599056	0.874015	-3.9526
XPO4	0.212335	-1.36092e-16	1.89812	0.0599673	0.874015	-3.95318
RPL12P47	0.180012	-1.14604e-16	1.89806	0.0599762	0.874015	-3.95327
NBR1	0.177899	3.11579e-16	1.89784	0.0600047	0.874015	-3.95354
ARL6IP1P3	0.120969	3.58136e-18	1.89754	0.0600453	0.874015	-3.95392
URM1	0.191934	-5.73018e-17	1.89733	0.0600731	0.874015	-3.95418
CENPQ	0.183455	3.58136e-17	1.89701	0.0601158	0.874015	-3.95458
LSMEM2	0.119361	1.0386e-16	1.89638	0.0601993	0.874015	-3.95537
CYP2A6	0.105863	2.02347e-16	1.89566	0.0602954	0.874015	-3.95627
NOB1	0.172944	-2.86509e-17	1.89509	0.0603717	0.874015	-3.95698
SGK2	0.149871	-7.16273e-18	1.89453	0.0604463	0.874015	-3.95768
RNF170	0.237263	1.86231e-16	1.89347	0.0605882	0.874015	-3.959
METTL18	0.190273	2.14882e-17	1.89329	0.0606128	0.874015	-3.95923
MLIP-AS1	0.133619	3.58136e-17	1.89245	0.0607255	0.874015	-3.96028
LEAP2	0.135285	-1.55789e-16	1.89153	0.0608484	0.874015	-3.96142
RNF13	0.237545	6.44646e-17	1.88993	0.0610641	0.874015	-3.96341
RPL5P8	0.148513	2.93672e-16	1.88988	0.0610708	0.874015	-3.96348
GOLGA6L22	0.115305	3.1516e-16	1.88957	0.0611133	0.874015	-3.96387
IGLVV-66	0.126312	-1.14604e-16	1.88948	0.061126	0.874015	-3.96399
RPL23AP58	0.16959	-1.8265e-16	1.88786	0.061344	0.874015	-3.96599
RPS27AP3	0.160978	-4.65577e-17	1.88749	0.0613953	0.874015	-3.96647
MBOAT4	0.113709	-2.16673e-16	1.88667	0.0615053	0.874015	-3.96747
PRICKLE2-AS1	0.127333	-4.47671e-17	1.88605	0.0615905	0.874015	-3.96826
CYTL1	0.139408	-1.93394e-16	1.8859	0.0616105	0.874015	-3.96844
RPL35	0.285443	1.36092e-16	1.88577	0.061628	0.874015	-3.9686
MUC20P1	0.165483	-3.00835e-16	1.88538	0.061682	0.874015	-3.96909
PPIAP31	0.18241	-1.61161e-16	1.88518	0.0617084	0.874015	-3.96933
PTGES3P1	0.143463	-8.59528e-17	1.88516	0.061711	0.874015	-3.96936
CCDC110	0.185637	-2.13091e-16	1.88503	0.0617287	0.874015	-3.96952
DNASE2B	0.114719	-7.16273e-17	1.88502	0.0617297	0.874015	-3.96953
TUBB8P8	0.119535	-8.23714e-17	1.88501	0.0617323	0.874015	-3.96955
CES1P2	0.134337	-3.79625e-16	1.88473	0.0617697	0.874015	-3.96989
RAB28P3	0.12727	-1.46836e-16	1.88464	0.0617817	0.874015	-3.97
TMEM120A	0.185807	-3.90369e-16	1.88458	0.0617899	0.874015	-3.97008
SEPHS2	0.139148	-6.44646e-17	1.88427	0.0618328	0.874015	-3.97047
RPSAP40	0.155243	3.22323e-17	1.88415	0.0618488	0.874015	-3.97061
OR2T32P	0.122383	-4.65577e-17	1.8839	0.0618829	0.874015	-3.97092
FAM122A	0.145382	-9.31155e-17	1.88389	0.0618841	0.874015	-3.97094
TRUB1	0.132292	3.50974e-16	1.88362	0.0619206	0.874015	-3.97127
MT-TP	0.184368	1.00278e-16	1.88356	0.0619291	0.874015	-3.97135
RAB18	0.225984	-2.97253e-16	1.88331	0.061963	0.874015	-3.97165
IGHEP1	0.125582	-5.73018e-17	1.88295	0.0620124	0.874015	-3.9721
OPN1LW	0.122463	-4.01113e-16	1.88178	0.062173	0.874015	-3.97356
RPL7AP30	0.176063	1.36092e-16	1.881	0.0622804	0.874015	-3.97453
HTR7	0.130502	1.71906e-16	1.8809	0.062293	0.874015	-3.97465
KLF5	0.304182	-2.65021e-16	1.88082	0.0623038	0.874015	-3.97475
OPN1SW	0.131754	-6.08832e-17	1.88076	0.0623125	0.874015	-3.97482
STK39	0.229605	1.00278e-16	1.8802	0.0623894	0.874015	-3.97552
C1GALT1	0.198835	6.44646e-17	1.8782	0.062665	0.874015	-3.978
GPRASP2	0.105254	8.05807e-17	1.8779	0.0627066	0.874015	-3.97837
PLCL1	0.168408	1.41464e-16	1.87785	0.0627133	0.874015	-3.97843
FAM83C	0.106097	-2.22045e-16	1.87766	0.0627396	0.874015	-3.97867
PEX5L-AS1	0.10524	1.07441e-17	1.87742	0.0627723	0.874015	-3.97896
TRAPPC5	0.151877	-2.14882e-16	1.87729	0.0627904	0.874015	-3.97913
XYLB	0.155665	1.86231e-16	1.87727	0.0627938	0.874015	-3.97916
ZFY	0.141879	-1.37883e-16	1.87696	0.0628366	0.874015	-3.97954
OR4S1	0.111132	2.25626e-16	1.87686	0.0628506	0.874015	-3.97967
ACTR8	0.158484	-4.11857e-16	1.87684	0.0628524	0.874015	-3.97968
DNA2	0.129152	2.14882e-16	1.87682	0.0628557	0.874015	-3.97971
BOLA3P3	0.239462	4.01113e-16	1.87629	0.0629294	0.874015	-3.98037
SNRPGP10	0.219273	2.14882e-16	1.87571	0.0630095	0.874015	-3.98109
RXFP4	0.117605	-1.25348e-16	1.87563	0.0630202	0.874015	-3.98118
CLSPN	0.186614	7.16273e-18	1.87527	0.0630706	0.874015	-3.98163
DRD3	0.114733	7.16273e-17	1.87473	0.0631452	0.874015	-3.9823
RPL36P4	0.159189	1.43255e-16	1.87445	0.0631843	0.874015	-3.98265
OR10B1P	0.123839	-1.61161e-16	1.87428	0.0632076	0.874015	-3.98286
CLVS2	0.0993496	-6.08832e-17	1.87289	0.0634015	0.874015	-3.98458
MKRN1	0.240064	-3.04416e-16	1.87264	0.0634356	0.874015	-3.98488
DDX3Y	0.412251	5.01391e-17	1.87168	0.0635691	0.874015	-3.98606
ASS1	0.24847	2.14882e-16	1.87168	0.0635698	0.874015	-3.98607
GAPDHP32	0.121378	9.31155e-17	1.87125	0.0636297	0.874015	-3.9866
LYPLA1P3	0.10023	-1.79068e-16	1.8707	0.0637063	0.874015	-3.98728
ANKRD46	0.159258	-1.86231e-16	1.86915	0.0639238	0.874015	-3.9892
LPIN3	0.158052	7.879e-17	1.86907	0.0639345	0.874015	-3.98929
CACNA1D	0.161116	2.86509e-16	1.86901	0.0639438	0.874015	-3.98937
TMEM31	0.119394	1.28929e-16	1.86867	0.0639907	0.874015	-3.98978
PPARGC1B	0.157905	4.22601e-16	1.86865	0.0639934	0.874015	-3.98981
IGHV3-47	0.215578	-1.0386e-16	1.8684	0.0640281	0.874015	-3.99011
CHORDC1	0.252785	-1.36092e-16	1.86837	0.0640334	0.874015	-3.99016
MICALL1	0.128241	1.79068e-16	1.86831	0.0640413	0.874015	-3.99023
CD46	0.267978	6.37483e-16	1.86766	0.064133	0.874015	-3.99103
RPL21P5	0.122831	-3.29486e-16	1.86652	0.0642925	0.874015	-3.99243
METAP2	0.157867	-4.22601e-16	1.86644	0.0643041	0.874015	-3.99253
ZNF503-AS1	0.317094	-2.18463e-16	1.86621	0.0643369	0.874015	-3.99282
IGHV1OR15-2	0.18829	-2.29207e-16	1.86556	0.0644285	0.874015	-3.99362
RBBP4P4	0.149738	-1.86231e-16	1.86489	0.0645231	0.874015	-3.99444
RPL7AP60	0.156819	3.43811e-16	1.86434	0.0646011	0.874015	-3.99512
XLOC_009911	0.113105	-3.29486e-16	1.86426	0.0646127	0.874015	-3.99522
TERF2	0.252203	1.86231e-16	1.86396	0.064655	0.874015	-3.99559
KIAA1191	0.10637	1.36092e-16	1.86313	0.0647721	0.874015	-3.99661
IGKV2D-30	0.236488	1.07441e-17	1.86284	0.064814	0.874015	-3.99697
SMG1P2	0.204084	4.36926e-16	1.86282	0.0648164	0.874015	-3.99699
NHP2P2	0.119917	-3.50974e-16	1.86265	0.0648398	0.874015	-3.9972
ALG1L10P	0.111306	1.64743e-16	1.8624	0.0648753	0.874015	-3.9975
ALG1L11P	0.105775	-5.73018e-17	1.86237	0.0648803	0.874015	-3.99755
CASP1P1	0.129894	-4.29764e-17	1.86142	0.0650145	0.874015	-3.99871
RMND1	0.109575	-1.46836e-16	1.8611	0.0650604	0.874015	-3.9991
MTCO2P2	0.197976	2.86509e-17	1.86089	0.0650912	0.874015	-3.99937
RPL12P50	0.227554	2.50696e-16	1.85974	0.0652537	0.874015	-4.00077
RPS18	0.222946	-7.23436e-16	1.85965	0.0652679	0.874015	-4.00089
ALG3	0.167176	2.3637e-16	1.85953	0.0652839	0.874015	-4.00103
CRIPT	0.237698	-3.36648e-16	1.85892	0.0653712	0.874015	-4.00178
SERPINB7	0.139727	1.02069e-16	1.85818	0.0654776	0.874015	-4.0027
TRMU	0.144396	1.46836e-16	1.858	0.0655035	0.874015	-4.00292
CENPH	0.112634	1.5758e-16	1.85768	0.0655487	0.874015	-4.00331
GRPEL1	0.167842	2.00556e-16	1.85669	0.06569	0.874015	-4.00451
IGHVIII-67-4	0.124168	1.36092e-16	1.85657	0.0657077	0.874015	-4.00467
RMRPP5	0.10687	9.31155e-17	1.85651	0.0657161	0.874015	-4.00474
USF3	0.147081	6.44646e-17	1.85606	0.0657809	0.874015	-4.00529
HSPD1P8	0.110647	4.29764e-17	1.8558	0.065818	0.874015	-4.00561
TRPS1	0.112832	-8.23714e-17	1.85539	0.0658781	0.874015	-4.00612
ESF1	0.209879	9.84875e-17	1.85499	0.0659346	0.874015	-4.0066
TRAPPC13	0.164882	-5.37205e-17	1.85433	0.0660294	0.874015	-4.00741
GALNT18	0.123034	3.9395e-17	1.85407	0.0660675	0.874015	-4.00773
QRICH1	0.100207	-3.1516e-16	1.85371	0.0661189	0.874015	-4.00817
SNRPEP5	0.127027	1.46836e-16	1.85367	0.0661252	0.874015	-4.00822
RPL39	0.250434	8.45202e-16	1.85256	0.0662854	0.874015	-4.00958
HAX1	0.143526	-3.58136e-16	1.85245	0.0663014	0.874015	-4.00971
AGFG2	0.162208	-3.36648e-16	1.85229	0.0663243	0.874015	-4.00991
ST6GALNAC4	0.129977	3.58136e-17	1.85224	0.066332	0.874015	-4.00997
ACTP1	0.104846	2.86509e-16	1.85196	0.0663724	0.874015	-4.01032
EXOSC7	0.15274	-3.47392e-16	1.85192	0.0663778	0.874015	-4.01036
ZNF767P	0.177964	-3.76043e-16	1.85189	0.0663824	0.874015	-4.0104
RHOT1P2	0.133335	4.40508e-16	1.85145	0.0664457	0.874015	-4.01094
MAPRE3	0.137233	1.53999e-16	1.85081	0.066539	0.874015	-4.01172
DGCR8	0.243806	7.16273e-17	1.85019	0.0666285	0.874015	-4.01248
DAZAP1	0.122922	3.07997e-16	1.8497	0.0666997	0.874015	-4.01308
SLC6A20	0.159809	-2.86509e-16	1.84915	0.0667796	0.874015	-4.01375
RPL23AP25	0.206191	-7.879e-17	1.84894	0.0668101	0.874015	-4.014
SGK3	0.262395	-4.15438e-16	1.8481	0.0669319	0.874015	-4.01503
PRAMEF29P	0.118305	1.36092e-16	1.84731	0.0670478	0.874015	-4.016
OR4K12P	0.109506	-5.37205e-17	1.84695	0.0671005	0.874015	-4.01644
NEURL1-AS1	0.101847	2.07719e-16	1.84666	0.0671424	0.874015	-4.01679
RP9	0.14058	-3.33067e-16	1.84665	0.0671443	0.874015	-4.0168
CWC22	0.149558	1.75487e-16	1.84661	0.0671507	0.874015	-4.01686
ABHD15	0.137875	-3.58136e-17	1.84587	0.0672585	0.874015	-4.01775
RPL21P104	0.113169	1.86231e-16	1.84496	0.0673913	0.874015	-4.01886
CYP51A1	0.271444	6.44646e-17	1.84494	0.0673942	0.874015	-4.01889
PDHA1	0.163551	-4.33345e-16	1.84484	0.0674094	0.874015	-4.01901
FAM86FP	0.202478	-2.14882e-16	1.84457	0.0674486	0.874015	-4.01934
ZNF574	0.138081	1.28929e-16	1.84454	0.0674533	0.874015	-4.01938
GATC	0.131086	-1.79068e-16	1.84432	0.0674853	0.874015	-4.01964
MIPEPP3	0.138786	-1.79068e-16	1.84375	0.0675686	0.874015	-4.02033
FEZF2	0.124205	-1.3072e-16	1.84372	0.0675741	0.874015	-4.02038
PDIA4	0.189239	-6.80459e-17	1.84362	0.0675877	0.874015	-4.02049
RBKS	0.115058	9.49062e-17	1.84347	0.0676099	0.874015	-4.02068
FAM47A	0.117883	-8.95341e-17	1.84321	0.0676481	0.874015	-4.02099
MUC5AC	0.157738	-1.36092e-16	1.84205	0.0678192	0.874015	-4.02241
OR7E116P	0.131133	-1.00278e-16	1.84181	0.067855	0.874015	-4.0227
F11R	0.219656	1.53999e-16	1.84171	0.0678694	0.874015	-4.02282
GPAT4	0.124626	-3.4023e-16	1.84119	0.0679457	0.874015	-4.02345
CMC1	0.255546	2.18463e-16	1.84114	0.0679532	0.874015	-4.02351
TRIM24	0.235196	2.32789e-16	1.84103	0.0679691	0.874015	-4.02365
RFC4	0.204753	-1.71906e-16	1.84075	0.0680103	0.874015	-4.02399
RPS13	0.283246	-2.00556e-16	1.84001	0.0681207	0.874015	-4.02489
MSTO2P	0.167118	4.36926e-16	1.83973	0.0681618	0.874015	-4.02523
SAGE1	0.129916	-5.37205e-18	1.83859	0.06833	0.874015	-4.02661
NDUFA5	0.185326	2.86509e-16	1.83764	0.0684714	0.874015	-4.02777
DDX10P2	0.112605	-1.0386e-16	1.83737	0.0685108	0.874015	-4.02809
MALL	0.216948	3.29486e-16	1.83666	0.0686162	0.874015	-4.02895
IGHV3-13	0.0941774	-1.07441e-16	1.83589	0.0687319	0.874015	-4.0299
RPS16P9	0.123593	6.44646e-17	1.83582	0.0687425	0.874015	-4.02998
CEBPZ	0.213976	-1.07441e-17	1.83569	0.0687606	0.874015	-4.03013
PRDM10	0.134794	1.89812e-16	1.83529	0.068821	0.874015	-4.03062
EEF1A1P26	0.134974	4.11857e-17	1.83529	0.0688211	0.874015	-4.03062
CHRNA6	0.114528	-2.07719e-16	1.83481	0.0688931	0.874015	-4.03121
RPL31P41	0.0995838	1.8265e-16	1.83457	0.068929	0.874015	-4.0315
MEPCE	0.158365	-6.44646e-17	1.83454	0.0689328	0.874015	-4.03153
CDK1	0.252923	8.23714e-17	1.83383	0.0690383	0.874015	-4.03239
MMP9	0.189132	-3.58136e-17	1.8334	0.0691036	0.874015	-4.03292
DOK4	0.148195	3.22323e-17	1.83298	0.0691665	0.874015	-4.03343
TRBV10-1	0.113555	-7.52087e-17	1.83292	0.0691753	0.874015	-4.0335
KRTAP4-11	0.121677	-1.89812e-16	1.83247	0.0692431	0.874015	-4.03405
DCAF15	0.149792	-3.4023e-16	1.83245	0.0692463	0.874015	-4.03407
SBDSP1	0.215207	2.47114e-16	1.83219	0.0692845	0.874015	-4.03438
ZNF207	0.171193	-8.59528e-17	1.83186	0.0693343	0.874015	-4.03478
VPS4A	0.143323	-1.00278e-16	1.83178	0.0693455	0.874015	-4.03487
CYCSP29	0.125768	8.59528e-17	1.83176	0.0693488	0.874015	-4.0349
GUCA1C	0.112813	1.79068e-16	1.83173	0.069353	0.874015	-4.03493
FRG1KP	0.166082	-9.66968e-17	1.83169	0.069359	0.874015	-4.03498
EXOSC6	0.125991	3.86787e-16	1.83145	0.0693962	0.874015	-4.03528
ANLN	0.27621	-9.31155e-17	1.83098	0.0694662	0.874015	-4.03585
CNOT8	0.151478	7.16273e-18	1.83086	0.0694843	0.874015	-4.03599
CDK5RAP1	0.142567	-7.16273e-18	1.83047	0.0695422	0.874015	-4.03646
ZNF114	0.106118	-1.86231e-16	1.83038	0.0695568	0.874015	-4.03657
HSPE1P8	0.302515	-1.61161e-16	1.8302	0.069583	0.874015	-4.03678
TRMT112P2	0.103716	-1.14604e-16	1.83019	0.0695846	0.874015	-4.0368
UBA52P7	0.126496	8.95341e-17	1.83013	0.0695933	0.874015	-4.03687
STSP1	0.119966	-9.66968e-17	1.82974	0.0696534	0.874015	-4.03735
PPIAP3	0.105925	3.22323e-17	1.82933	0.0697143	0.874015	-4.03784
FEV	0.142712	2.50696e-17	1.82923	0.0697293	0.874015	-4.03796
TMEM210	0.138968	1.71906e-16	1.82909	0.0697511	0.874015	-4.03813
AKR1C3	0.163965	-9.66968e-17	1.828	0.0699146	0.874015	-4.03944
OR11H1	0.11966	-1.89812e-16	1.82768	0.0699642	0.874015	-4.03984
PLEKHA6	0.117512	-3.9395e-16	1.82736	0.0700123	0.874015	-4.04023
LAPTM4B	0.207883	-7.16273e-17	1.82732	0.0700181	0.874015	-4.04027
CCNC	0.130894	7.879e-17	1.82714	0.0700448	0.874015	-4.04049
SNORD51	0.18839	8.77434e-17	1.82705	0.0700583	0.874015	-4.04059
DNAJC16	0.296619	-3.47392e-16	1.82623	0.0701825	0.874015	-4.04158
FAM85B	0.111594	-2.93672e-16	1.826	0.0702173	0.874015	-4.04186
PPME1	0.16912	-1.50417e-16	1.82561	0.0702773	0.874015	-4.04234
OR3A3	0.1317	2.07719e-16	1.82555	0.0702857	0.874015	-4.0424
TMEM249	0.132336	-8.23714e-17	1.82552	0.070291	0.874015	-4.04245
MRPL13	0.310881	3.25904e-16	1.82529	0.0703264	0.874015	-4.04273
PMS2P9	0.223273	-4.51252e-16	1.82489	0.0703863	0.874015	-4.0432
RPL29P24	0.151333	1.79068e-16	1.82487	0.0703894	0.874015	-4.04323
CDC42EP3P1	0.12902	1.3251e-16	1.82439	0.0704631	0.874015	-4.04381
WBP4	0.151883	7.16273e-17	1.82424	0.0704849	0.874015	-4.04399
FRG2B	0.13925	3.29486e-16	1.82393	0.0705323	0.874015	-4.04436
SLC17A6	0.133214	-1.00278e-16	1.82146	0.0709098	0.874015	-4.04735
KIZ	0.20117	2.07719e-16	1.82079	0.0710111	0.874015	-4.04814
MRPS6P4	0.0991589	-4.83484e-17	1.81987	0.0711524	0.874015	-4.04925
FRG1DP	0.168571	1.79068e-16	1.81983	0.0711581	0.874015	-4.0493
C20orf197	0.120132	8.59528e-17	1.81956	0.0711993	0.874015	-4.04962
SAMD14	0.112027	-3.97531e-16	1.81951	0.0712083	0.874015	-4.04969
PCBP2P1	0.129912	-1.64743e-16	1.81936	0.0712312	0.874015	-4.04987
RPL7P23	0.188812	-4.1902e-16	1.81935	0.0712323	0.874015	-4.04988
ENPP1	0.206334	9.66968e-17	1.81857	0.0713525	0.874015	-4.05082
TMPO	0.205073	9.31155e-17	1.81855	0.0713556	0.874015	-4.05085
IMPA1	0.157805	1.07441e-16	1.81841	0.0713774	0.874015	-4.05102
SNRPB2	0.243769	-6.3032e-16	1.81786	0.0714618	0.874015	-4.05168
RPS15AP24	0.229035	8.59528e-17	1.81728	0.0715506	0.874015	-4.05237
HLA-DQB3	0.0933646	4.15438e-16	1.81649	0.0716725	0.874015	-4.05332
CCDC71L	0.101536	-2.14882e-16	1.81619	0.0717183	0.874015	-4.05368
TSEN2	0.169716	4.36926e-16	1.81581	0.0717771	0.874015	-4.05414
OR4C13	0.138138	3.04416e-17	1.81573	0.0717891	0.874015	-4.05423
EEF1DP1	0.109052	-1.68324e-16	1.81486	0.0719245	0.874015	-4.05528
NEIL1	0.131016	-1.36092e-16	1.81481	0.0719315	0.874015	-4.05534
MTND3P21	0.122428	3.58136e-17	1.81456	0.0719699	0.874015	-4.05563
SDHCP3	0.136699	-1.46836e-16	1.81444	0.071989	0.874015	-4.05578
NAMPTP3	0.219099	3.58136e-16	1.81433	0.0720057	0.874015	-4.05591
MESP1	0.126385	-3.68881e-16	1.81423	0.0720212	0.874015	-4.05603
XIAP	0.217853	-3.07997e-16	1.81328	0.0721684	0.874015	-4.05717
CRYL1	0.26348	4.36926e-16	1.81322	0.0721779	0.874015	-4.05724
NPM1P6	0.148076	-1.79068e-17	1.81311	0.0721945	0.874015	-4.05737
DCP1A	0.106463	-6.44646e-17	1.81262	0.072272	0.874015	-4.05797
SLC7A1	0.244276	5.37205e-17	1.81233	0.0723163	0.874015	-4.05831
PI4KB	0.150295	-7.52087e-17	1.81177	0.0724033	0.874015	-4.05898
ZNF785	0.143548	-1.86231e-16	1.81175	0.0724069	0.874015	-4.05901
EPHB4	0.141942	2.04138e-16	1.81141	0.0724587	0.874015	-4.05941
DUX4L24	0.107684	7.16273e-17	1.81098	0.0725267	0.874015	-4.05993
DUX4L22	0.107684	7.16273e-17	1.81098	0.0725267	0.874015	-4.05993
DUX4L10	0.107684	7.16273e-17	1.81098	0.0725267	0.874015	-4.05993
TXNP7	0.12354	-1.68324e-16	1.81016	0.0726536	0.874015	-4.06091
ROMO1	0.196312	-6.23157e-16	1.81009	0.0726644	0.874015	-4.06099
NDUFB2	0.277596	-3.50974e-16	1.81001	0.0726769	0.874015	-4.06109
ZNF341	0.15393	-4.04694e-16	1.80939	0.0727737	0.874015	-4.06183
OLFML2A	0.110318	2.75765e-16	1.80857	0.0729032	0.874015	-4.06282
XRN2	0.223997	2.86509e-17	1.80781	0.0730212	0.874015	-4.06372
RAB12	0.118888	7.879e-17	1.80721	0.0731155	0.874015	-4.06444
HEATR3	0.132122	2.90091e-16	1.80718	0.0731201	0.874015	-4.06448
BTN3A2	0.183686	7.879e-17	1.8071	0.0731322	0.874015	-4.06457
OTX2-AS1	0.119765	1.79068e-16	1.80708	0.0731362	0.874015	-4.0646
AURKA	0.209191	3.65299e-16	1.80679	0.0731818	0.874015	-4.06495
KCTD20	0.154481	-1.07441e-16	1.8065	0.073227	0.874015	-4.06529
LAMTOR4	0.135477	-3.86787e-16	1.80643	0.0732375	0.874015	-4.06537
OR5H15	0.107008	1.43255e-17	1.80638	0.0732464	0.874015	-4.06544
TTK	0.287547	2.75765e-16	1.80626	0.0732641	0.874015	-4.06558
KRT18P41	0.0986642	1.14604e-16	1.80616	0.07328	0.874015	-4.0657
PTDSS1	0.221334	-2.86509e-16	1.80596	0.073312	0.874015	-4.06594
ZFYVE9P1	0.122417	3.76043e-17	1.80561	0.0733668	0.874015	-4.06636
RAC1P3	0.128886	2.07719e-16	1.80535	0.0734074	0.874015	-4.06667
LHFPL2	0.157873	-1.96975e-16	1.80527	0.0734197	0.874015	-4.06676
TTI2	0.144694	3.9395e-17	1.80494	0.0734715	0.874015	-4.06715
ZNF853	0.124851	-3.1516e-16	1.80413	0.0735995	0.874015	-4.06812
TBC1D3P1-DHX40P1	0.11059	2.43533e-16	1.80359	0.0736845	0.874015	-4.06877
MRPS21P3	0.1396	3.50974e-16	1.80341	0.0737134	0.874015	-4.06898
CNTN6	0.130941	1.53999e-16	1.80334	0.0737241	0.874015	-4.06906
RPS24P7	0.158307	-3.07997e-16	1.80285	0.073802	0.874015	-4.06965
DDHD2	0.142269	-1.61161e-16	1.8026	0.0738406	0.874015	-4.06994
KEAP1	0.124644	-1.43255e-17	1.80156	0.0740067	0.874015	-4.0712
PA2G4P2	0.151898	-3.22323e-17	1.80131	0.0740457	0.874015	-4.07149
RPL17P41	0.120297	-2.22045e-16	1.80093	0.0741059	0.874015	-4.07194
RAET1M	0.10311	-3.36648e-16	1.80081	0.0741248	0.874015	-4.07208
MPV17	0.22175	-1.8265e-16	1.80065	0.0741504	0.874015	-4.07228
PARTICL	0.106158	-4.47671e-17	1.80052	0.0741706	0.874015	-4.07243
CTDSPL	0.186181	-4.47671e-17	1.80011	0.0742356	0.874015	-4.07292
RPS26P55	0.144568	-4.08276e-16	1.7994	0.0743487	0.874015	-4.07377
DOC2A	0.149725	-1.79068e-16	1.7992	0.0743803	0.874015	-4.074
GPR180	0.193631	1.43255e-17	1.79881	0.0744419	0.874015	-4.07446
TBPL1	0.176757	2.86509e-17	1.79874	0.0744537	0.874015	-4.07455
MTND4LP30	0.229423	-8.38039e-16	1.79858	0.0744786	0.874015	-4.07474
RPS8P10	0.124791	-4.36926e-16	1.79739	0.0746694	0.874015	-4.07616
GPX2	0.275112	-3.86787e-16	1.79703	0.0747265	0.874015	-4.07659
OR6K4P	0.114893	-1.93394e-16	1.7963	0.0748423	0.874015	-4.07745
GFER	0.124262	4.22601e-16	1.79626	0.0748485	0.874015	-4.0775
SNRPCP15	0.152457	2.47114e-16	1.7959	0.0749071	0.874015	-4.07793
TRAIP	0.116289	-2.43533e-16	1.79512	0.0750323	0.874015	-4.07886
MPST	0.160907	-3.9395e-17	1.79464	0.0751083	0.874015	-4.07942
AK4	0.225138	3.43811e-16	1.79459	0.0751159	0.874015	-4.07948
PGPEP1L	0.0955841	1.36092e-16	1.79458	0.0751188	0.874015	-4.0795
RASL10B	0.142021	1.79068e-16	1.79456	0.0751222	0.874015	-4.07953
POFUT1	0.237439	5.01391e-17	1.79442	0.0751435	0.874015	-4.07969
KRT8	0.12446	2.72184e-16	1.79427	0.0751687	0.874015	-4.07987
RPL22P11	0.082139	1.36092e-16	1.79426	0.07517	0.874015	-4.07988
NMUR1	0.152302	2.18463e-16	1.79423	0.0751737	0.874015	-4.07991
MTND2P25	0.116286	-1.28929e-16	1.79403	0.0752072	0.874015	-4.08016
CYP4F2	0.102537	-4.29764e-16	1.79395	0.0752199	0.874015	-4.08025
ZNF326	0.162959	-1.8444e-16	1.79355	0.0752831	0.874015	-4.08072
ACSM3	0.326756	-2.72184e-16	1.79279	0.0754057	0.874015	-4.08162
PFN1P12	0.101787	1.71906e-16	1.79259	0.0754377	0.874015	-4.08186
MGAT4A	0.257058	-2.50696e-16	1.79256	0.0754421	0.874015	-4.08189
SLC16A1-AS1	0.211769	-7.52087e-17	1.79179	0.0755668	0.874015	-4.08281
RPL7P46	0.0937619	5.37205e-17	1.79081	0.075725	0.874015	-4.08397
CDCA5	0.172518	3.72462e-16	1.78964	0.0759144	0.874015	-4.08536
SDCBPP1	0.117031	-1.79068e-17	1.78956	0.0759271	0.874015	-4.08546
RAC3	0.141212	3.58136e-16	1.78937	0.0759579	0.874015	-4.08568
WT1-AS	0.121666	3.07997e-16	1.78901	0.0760153	0.874015	-4.0861
RAB24	0.107742	-2.14882e-17	1.78874	0.07606	0.874015	-4.08643
RPSAP25	0.117486	3.22323e-17	1.78824	0.07614	0.874015	-4.08701
MOGS	0.154286	-5.37205e-17	1.78793	0.0761911	0.874015	-4.08739
BIRC5	0.103101	9.31155e-17	1.78718	0.0763117	0.874015	-4.08827
TRIM60	0.101969	-2.14882e-17	1.78707	0.0763304	0.874015	-4.0884
HNRNPLP2	0.114998	3.43811e-16	1.78697	0.0763468	0.874015	-4.08852
ZNF512B	0.109013	-1.11022e-16	1.78616	0.0764785	0.874015	-4.08948
DNAJC17	0.14104	-3.90369e-16	1.78582	0.0765329	0.874015	-4.08988
E2F8	0.320531	1.77278e-16	1.78558	0.0765728	0.874015	-4.09016
GRK5	0.198371	-7.879e-17	1.78454	0.0767429	0.874015	-4.0914
TMEM70	0.119102	3.83206e-16	1.78435	0.0767734	0.874015	-4.09162
HSPE1P10	0.150207	6.08832e-17	1.78429	0.0767836	0.874015	-4.09169
DEPDC7	0.293667	-3.11579e-16	1.78356	0.0769027	0.874015	-4.09255
CFL1P6	0.0967205	6.44646e-17	1.7834	0.0769279	0.874015	-4.09274
RPS19BP1	0.139848	3.58136e-18	1.78335	0.0769373	0.874015	-4.0928
ZDHHC22	0.132873	-2.6144e-16	1.78315	0.0769697	0.874015	-4.09304
ZMYM5	0.173679	-9.66968e-17	1.7829	0.0770104	0.874015	-4.09333
GABRD	0.133809	1.5758e-16	1.78276	0.0770339	0.874015	-4.0935
WBP1LP10	0.11405	-1.28929e-16	1.78273	0.0770387	0.874015	-4.09354
HSD17B2	0.126013	-8.59528e-17	1.78208	0.0771451	0.874015	-4.0943
PPIAP9	0.113558	-7.16273e-18	1.78208	0.0771453	0.874015	-4.0943
DEFA10P	0.099587	1.39673e-16	1.78166	0.0772129	0.874015	-4.09479
MYBBP1A	0.123226	2.25626e-16	1.78151	0.0772375	0.874015	-4.09497
OR2AT1P	0.137417	1.3251e-16	1.78139	0.077258	0.874015	-4.09511
KIF20B	0.208982	-2.97253e-16	1.78047	0.0774084	0.874015	-4.09619
PRNT	0.137553	2.04138e-16	1.78044	0.0774146	0.874015	-4.09624
IGKV2OR2-2	0.108447	6.08832e-17	1.78041	0.0774185	0.874015	-4.09627
POU5F1	0.15682	-2.04138e-16	1.78028	0.0774397	0.874015	-4.09642
SNX18P7	0.140433	1.46836e-16	1.78025	0.077445	0.874015	-4.09646
PPP4C	0.146348	-3.36648e-16	1.77997	0.0774917	0.874015	-4.09679
MGME1	0.150593	1.14604e-16	1.77991	0.0775006	0.874015	-4.09686
PAK1	0.106527	2.50696e-17	1.77986	0.0775088	0.874015	-4.09691
KRT18P57	0.135225	6.08832e-17	1.77939	0.0775866	0.874015	-4.09747
FZD5	0.141197	-7.16273e-17	1.7793	0.0776023	0.874015	-4.09758
RGS19	0.0946462	2.72184e-16	1.77927	0.0776057	0.874015	-4.09761
MLST8	0.132576	1.36092e-16	1.7787	0.0777002	0.874015	-4.09828
OR7E148P	0.111812	-7.16273e-17	1.77864	0.0777106	0.874015	-4.09836
CFTR	0.458137	1.21766e-16	1.77854	0.0777273	0.874015	-4.09848
RPS6P25	0.181339	1.14604e-16	1.77796	0.0778225	0.874015	-4.09916
RPL9P33	0.109781	-1.07441e-17	1.77784	0.0778421	0.874015	-4.0993
CARD14	0.0925539	-2.14882e-17	1.77744	0.0779078	0.874015	-4.09977
TRAPPC2P5	0.115065	1.19976e-16	1.77741	0.077914	0.874015	-4.09981
KRTAP10-1	0.11989	2.14882e-16	1.77713	0.0779592	0.874015	-4.10013
COX6CP4	0.101947	1.75487e-16	1.77686	0.0780035	0.874015	-4.10045
BEX2	0.14489	3.68881e-16	1.77666	0.0780367	0.874015	-4.10068
HPGD	0.271092	2.90091e-16	1.77666	0.0780371	0.874015	-4.10069
RPL13AP3	0.179905	-1.07441e-17	1.77664	0.07804	0.874015	-4.10071
HNRNPA1P47	0.104799	2.86509e-17	1.7761	0.0781304	0.874015	-4.10135
EIF3C	0.265654	-3.18741e-16	1.77608	0.0781339	0.874015	-4.10137
RIPPLY3	0.127687	2.14882e-17	1.7753	0.0782626	0.874015	-4.10229
ESD	0.255971	1.07441e-17	1.7749	0.0783291	0.874015	-4.10276
RPL5P22	0.103003	1.0386e-16	1.77479	0.0783479	0.874015	-4.10289
TMEM176A	0.283708	3.36648e-16	1.77446	0.0784016	0.874015	-4.10327
C5orf51	0.121155	5.73018e-17	1.77425	0.0784373	0.874015	-4.10352
SHANK2-AS1	0.139585	-1.36092e-16	1.77415	0.0784529	0.874015	-4.10364
CERS4	0.0988389	9.31155e-17	1.77374	0.0785218	0.874015	-4.10412
ANK3	0.267464	3.68881e-16	1.77372	0.078525	0.874015	-4.10414
BOLA2P1	0.153637	-1.28929e-16	1.77265	0.0787035	0.874015	-4.1054
ARL3	0.155763	-3.68881e-16	1.77207	0.0787997	0.874015	-4.10608
PGGT1B	0.112961	-2.07719e-16	1.77183	0.0788397	0.874015	-4.10636
PAX8-AS1	0.236896	-3.68881e-16	1.77179	0.0788463	0.874015	-4.10641
NDUFB11	0.162225	-4.08276e-16	1.77126	0.0789354	0.874015	-4.10704
RPS4XP14	0.199628	2.3637e-16	1.77087	0.0790009	0.874015	-4.1075
TAF2	0.262672	-4.33345e-16	1.77072	0.0790251	0.874015	-4.10767
CD7	0.116489	4.22601e-16	1.77069	0.0790304	0.874015	-4.1077
PLAC8L1	0.127831	1.86231e-16	1.77027	0.0791011	0.874015	-4.1082
FAM86LP	0.102445	1.93394e-16	1.7702	0.0791122	0.874015	-4.10828
CA6	0.127126	6.80459e-17	1.77007	0.0791341	0.874015	-4.10843
ASB13	0.128456	9.49062e-17	1.76992	0.0791596	0.874015	-4.10861
RPL36AP26	0.215215	-3.65299e-16	1.76923	0.0792744	0.874015	-4.10941
ALG8	0.218256	-1.34301e-16	1.76911	0.0792954	0.874015	-4.10956
WFDC13	0.171466	2.86509e-17	1.76822	0.0794443	0.874015	-4.1106
ABHD13	0.146789	-3.54555e-16	1.7677	0.079531	0.874015	-4.1112
CEACAM1	0.295344	1.86231e-16	1.76748	0.0795687	0.874015	-4.11147
GRIA2	0.134274	4.29764e-17	1.7671	0.079632	0.874015	-4.11191
TSPAN6	0.255677	-2.50696e-16	1.76691	0.0796641	0.874015	-4.11213
TUBAP2	0.200033	-2.79346e-16	1.7669	0.0796654	0.874015	-4.11214
RPS3AP4	0.134331	-3.9395e-17	1.76651	0.0797317	0.874015	-4.1126
STARD4	0.186979	3.36648e-16	1.76647	0.0797389	0.874015	-4.11265
GGCT	0.194178	2.43533e-16	1.7658	0.0798518	0.874015	-4.11344
CROCCP5	0.0992269	2.65021e-16	1.76569	0.0798695	0.874015	-4.11356
PRR5-ARHGAP8	0.191968	1.5758e-16	1.76564	0.0798791	0.874015	-4.11362
RPL5P23	0.108042	7.879e-17	1.76546	0.0799097	0.874015	-4.11384
CMPK1	0.125423	3.86787e-16	1.76511	0.0799687	0.874015	-4.11425
PHBP3	0.130772	-3.22323e-17	1.76457	0.0800584	0.874015	-4.11487
UQCRHL	0.230099	3.54555e-16	1.76452	0.0800676	0.874015	-4.11493
RPL7P44	0.110993	2.29207e-16	1.76441	0.0800854	0.874015	-4.11505
LMCD1-AS1	0.104644	1.68324e-16	1.76439	0.080089	0.874015	-4.11508
SPATA2P1	0.123533	1.50417e-16	1.76333	0.0802686	0.874015	-4.11632
RPS4XP1	0.197794	3.50974e-16	1.76323	0.0802856	0.874015	-4.11644
CKAP2	0.265039	-2.50696e-16	1.76268	0.0803783	0.874015	-4.11708
RPL23AP4	0.133822	-3.00835e-16	1.76242	0.080424	0.874015	-4.11739
TMEM238	0.144067	2.3637e-16	1.76239	0.0804288	0.874015	-4.11742
NXPH3	0.133913	2.72184e-16	1.76208	0.0804814	0.874015	-4.11779
RPS8	0.254082	-5.08554e-16	1.76204	0.0804876	0.874015	-4.11783
TTPA	0.220634	-5.19298e-17	1.76193	0.0805066	0.874015	-4.11796
CYP2B7P	0.123435	-2.86509e-17	1.76187	0.0805171	0.874015	-4.11803
SUGCT	0.107191	-4.40508e-16	1.76174	0.0805385	0.874015	-4.11818
MRPL30	0.176927	2.11301e-16	1.76141	0.0805953	0.874015	-4.11857
GAPDHP29	0.103965	-1.5758e-16	1.76139	0.0805975	0.874015	-4.11858
IGHV3-33	0.157774	-4.36926e-16	1.7612	0.0806299	0.874015	-4.11881
PLA2G10	0.166149	-1.07441e-16	1.76081	0.0806973	0.874015	-4.11927
GTF3A	0.305066	-5.44367e-16	1.76065	0.0807237	0.874015	-4.11945
SNORD92	0.33308	-7.879e-17	1.76012	0.0808142	0.874015	-4.12007
NDUFA6	0.252302	2.18463e-16	1.76008	0.0808215	0.874015	-4.12012
RPRD1B	0.120426	-1.71906e-16	1.75987	0.0808574	0.874015	-4.12037
IGLJ3	0.0987202	1.28929e-16	1.7589	0.0810221	0.874015	-4.12149
ZNF251	0.106104	2.29207e-16	1.75829	0.0811266	0.874015	-4.12221
BCL2L12	0.215746	4.26182e-16	1.75801	0.0811732	0.874015	-4.12252
DDT	0.149272	-2.00556e-16	1.75785	0.0812021	0.874015	-4.12272
PPIP5K2	0.231319	-1.00278e-16	1.75771	0.0812261	0.874015	-4.12288
SETP14	0.172856	1.86231e-16	1.75752	0.0812581	0.874015	-4.1231
BRWD1P3	0.0903074	7.879e-17	1.75661	0.0814129	0.874015	-4.12416
CSTF3	0.137196	-1.28929e-16	1.75604	0.0815115	0.874015	-4.12483
PPP3CB	0.149152	7.16273e-18	1.75595	0.0815272	0.874015	-4.12493
RPL14	0.222632	-1.43255e-16	1.75541	0.0816193	0.874015	-4.12556
TFAP2C	0.12822	9.66968e-17	1.75521	0.0816536	0.874015	-4.12579
NAGLU	0.103898	-4.33345e-16	1.75503	0.0816855	0.874015	-4.12601
ISOC1	0.103747	-3.79625e-16	1.75416	0.0818336	0.874015	-4.12701
SNRPA	0.125876	1.50417e-16	1.75355	0.0819392	0.874015	-4.12772
GRM6	0.12447	2.14882e-17	1.75351	0.0819469	0.874015	-4.12777
RPSAP75	0.152148	1.96975e-16	1.75284	0.0820625	0.874015	-4.12855
IL17RB	0.163187	1.64743e-16	1.75283	0.0820625	0.874015	-4.12855
PREB	0.140948	4.01113e-16	1.75275	0.0820775	0.874015	-4.12865
DDX41	0.0784026	-1.28929e-16	1.75265	0.0820939	0.874015	-4.12876
POM121B	0.200405	-4.29764e-17	1.75238	0.0821408	0.874015	-4.12908
MLEC	0.205022	-8.59528e-17	1.752	0.082207	0.874015	-4.12952
RPL24P4	0.167839	-3.22323e-17	1.75167	0.0822643	0.874015	-4.12991
BMS1	0.1875	6.08832e-17	1.75153	0.0822882	0.874015	-4.13007
TMEM234	0.194066	1.36092e-16	1.75056	0.0824548	0.874015	-4.13119
CXXC5	0.140807	4.83484e-17	1.74938	0.0826609	0.874015	-4.13257
ATP6V0B	0.222499	4.29764e-16	1.74898	0.0827295	0.874015	-4.13303
RPS20P2	0.0836312	-2.50696e-16	1.74872	0.0827747	0.874015	-4.13333
CORO2A	0.235234	-3.11579e-16	1.74803	0.0828941	0.874015	-4.13413
KDF1	0.104986	-1.53999e-16	1.74775	0.0829428	0.874015	-4.13445
DNMBP-AS1	0.141974	7.16273e-18	1.74767	0.0829581	0.874015	-4.13455
RPA3	0.320073	2.50696e-17	1.74744	0.0829975	0.874015	-4.13481
SPPL2C	0.104488	-2.07719e-16	1.74687	0.0830963	0.874015	-4.13547
FBL	0.208525	2.43533e-16	1.74637	0.0831831	0.874015	-4.13605
ESPL1	0.10663	1.50417e-16	1.74618	0.0832174	0.874015	-4.13628
S100PBP	0.126389	3.18741e-16	1.74602	0.083245	0.874015	-4.13646
ARMC12	0.10084	2.72184e-16	1.74555	0.0833273	0.874015	-4.13701
SKA2P1	0.125733	1.25348e-16	1.74542	0.0833502	0.874015	-4.13716
VTI1A	0.114572	-1.71906e-16	1.74481	0.083456	0.874015	-4.13786
NDUFB3	0.121018	3.9395e-16	1.74469	0.0834763	0.874015	-4.13799
RPL37AP1	0.217004	-2.57858e-16	1.74456	0.0834993	0.874015	-4.13814
SERINC3	0.218989	4.33345e-16	1.74378	0.0836361	0.874015	-4.13905
SGTA	0.131074	8.23714e-17	1.74373	0.0836447	0.874015	-4.13911
RPS7	0.148183	-7.16273e-16	1.74365	0.083659	0.874015	-4.1392
TRPV6	0.187477	1.25348e-16	1.74355	0.0836766	0.874015	-4.13932
OR7E156P	0.118704	-1.86231e-16	1.74296	0.08378	0.874015	-4.14
ASMT	0.113095	-3.58136e-17	1.74272	0.0838216	0.874015	-4.14027
RCBTB1	0.112184	-4.44089e-16	1.74219	0.0839147	0.874015	-4.14088
MTRF1	0.16743	1.43255e-16	1.7416	0.0840183	0.874015	-4.14157
RPL5	0.186121	-3.1516e-16	1.74158	0.0840225	0.874015	-4.14159
RPL23AP16	0.120217	-9.84875e-17	1.74158	0.0840233	0.874015	-4.1416
OR4D2	0.115166	-4.29764e-16	1.7415	0.0840358	0.874015	-4.14168
MACC1	0.266853	-1.48627e-16	1.74134	0.0840651	0.874015	-4.14187
RPS4Y2	0.115826	2.00556e-16	1.74089	0.0841433	0.874015	-4.14239
RPL12P25	0.151702	-6.80459e-17	1.74086	0.0841497	0.874015	-4.14243
TRGVA	0.115174	3.72462e-16	1.7406	0.0841941	0.874015	-4.14272
NIFKP3	0.0941267	-7.16273e-18	1.73989	0.0843199	0.874015	-4.14354
CFLAR-AS1	0.148484	1.96975e-16	1.73979	0.0843378	0.874015	-4.14366
SMAD5	0.220892	1.93394e-16	1.73972	0.0843509	0.874015	-4.14375
SNX18P24	0.103141	6.62552e-17	1.73939	0.0844077	0.874015	-4.14412
RPL7P26	0.116655	-8.59528e-17	1.73926	0.0844314	0.874015	-4.14427
CDH17	0.277452	1.36092e-16	1.73921	0.0844397	0.874015	-4.14433
PIK3R2	0.12151	1.50417e-16	1.7391	0.0844601	0.874015	-4.14446
TPM3P7	0.126492	-1.07441e-16	1.73851	0.0845644	0.874015	-4.14514
SNORD60	0.188984	3.76043e-17	1.73849	0.0845665	0.874015	-4.14515
SLC25A47P1	0.119392	6.80459e-17	1.73835	0.0845915	0.874015	-4.14532
IGLV7-35	0.108291	-6.44646e-17	1.7383	0.0846	0.874015	-4.14537
MSRB2	0.1729	1.75487e-16	1.7378	0.0846893	0.874015	-4.14596
RPL39P6	0.179041	-4.29764e-17	1.73721	0.0847935	0.874015	-4.14663
DNAJB1P1	0.1191	-3.50974e-16	1.73657	0.0849065	0.874015	-4.14737
PRKAG2	0.181125	-2.54277e-16	1.73656	0.0849083	0.874015	-4.14738
RPL23AP43	0.19023	-3.07997e-16	1.73642	0.084934	0.874015	-4.14755
SLC52A3	0.125092	2.57858e-16	1.7364	0.084937	0.874015	-4.14757
ZMYND12	0.139423	1.66533e-16	1.73636	0.0849441	0.874015	-4.14761
ARL14	0.139435	6.26739e-17	1.73634	0.0849488	0.874015	-4.14764
NKX2-3	0.144713	0	1.73632	0.0849513	0.874015	-4.14766
STAG3L3	0.139783	1.14604e-16	1.73586	0.0850325	0.874015	-4.14819
PTGR1	0.208742	1.79068e-17	1.73568	0.0850651	0.874015	-4.1484
IGKV2-30	0.176017	-2.32789e-16	1.73511	0.0851671	0.874015	-4.14906
CIDEC	0.141417	3.58136e-18	1.73509	0.0851697	0.874015	-4.14908
ANKRD34A	0.117583	-1.14604e-16	1.73465	0.0852491	0.874015	-4.14959
MTCYBP28	0.126844	-1.5758e-16	1.73458	0.0852606	0.874015	-4.14966
PTK2	0.181238	1.00278e-16	1.73391	0.0853799	0.874015	-4.15043
KDM5D	0.141271	4.29764e-17	1.73325	0.0854974	0.874015	-4.15119
PFKFB2	0.141297	2.25626e-16	1.73309	0.0855259	0.874015	-4.15138
BIVM	0.178076	3.86787e-16	1.73288	0.0855636	0.874015	-4.15162
PLA2G1B	0.126241	-8.23714e-17	1.73239	0.0856502	0.874015	-4.15218
GLRX2	0.194292	3.86787e-16	1.73231	0.0856651	0.874015	-4.15227
RPS24	0.157487	3.1516e-16	1.7321	0.0857026	0.874015	-4.15251
TNFRSF13C	0.135862	3.1516e-16	1.73201	0.0857181	0.874015	-4.15261
GNG12	0.179912	0	1.73167	0.0857804	0.874015	-4.15301
RPL5P28	0.131829	1.53999e-16	1.73096	0.0859073	0.874015	-4.15383
GLYCTK	0.15606	-9.66968e-17	1.73067	0.0859585	0.874015	-4.15416
ANKRD66	0.100037	1.11022e-16	1.73067	0.0859588	0.874015	-4.15416
HSDL2	0.266176	-3.68881e-16	1.73066	0.0859598	0.874015	-4.15417
TPST2	0.0985545	-3.9395e-16	1.73044	0.0859994	0.874015	-4.15442
BANF1P3	0.185544	-1.0386e-16	1.72995	0.0860872	0.874015	-4.15498
RBBP8NL	0.0968723	-7.16273e-17	1.72934	0.0861969	0.874015	-4.15568
MINCR	0.122272	-3.50974e-16	1.7287	0.086313	0.874015	-4.15642
REEP6	0.11176	-1.21766e-16	1.72843	0.0863614	0.874015	-4.15673
CD3D	0.224362	-2.43533e-16	1.72813	0.0864149	0.874015	-4.15707
BAP1	0.124381	7.16273e-18	1.7275	0.0865283	0.874015	-4.1578
TSACC	0.191926	-2.04138e-16	1.72739	0.0865484	0.874015	-4.15792
HBQ1	0.109986	6.44646e-17	1.72732	0.086561	0.874015	-4.158
RPS15A	0.199994	6.3032e-16	1.72729	0.0865658	0.874015	-4.15804
ST13P6	0.118613	7.52087e-17	1.72698	0.0866217	0.874015	-4.15839
RPL7AP11	0.127396	-7.16273e-18	1.72657	0.0866955	0.874015	-4.15886
TTLL4	0.147924	-8.77434e-17	1.72644	0.086719	0.874015	-4.15901
VN1R13P	0.123609	2.93672e-16	1.7261	0.0867798	0.874015	-4.1594
FAM217B	0.171897	3.22323e-17	1.7258	0.0868355	0.874015	-4.15975
RAB21	0.144452	1.07441e-17	1.72569	0.0868543	0.874015	-4.15987
PSMB2	0.18499	4.29764e-16	1.72568	0.086856	0.874015	-4.15988
SERPINH1	0.129048	-3.58136e-16	1.72557	0.0868769	0.874015	-4.16001
HLA-DPA2	0.108584	1.21766e-16	1.72542	0.0869032	0.874015	-4.16018
CTSA	0.217281	-3.9395e-16	1.72508	0.0869653	0.874015	-4.16057
DAP3P2	0.123322	-1.75487e-16	1.72467	0.0870395	0.874015	-4.16104
FAM110A	0.133517	8.95341e-17	1.72382	0.087193	0.874015	-4.16201
MNX1-AS2	0.103366	-1.14604e-16	1.72343	0.0872634	0.874015	-4.16245
ZKSCAN1	0.231929	-2.14882e-16	1.72328	0.0872908	0.874015	-4.16263
LCE3A	0.152196	-2.82928e-16	1.72323	0.0873008	0.874015	-4.16269
CBWD1	0.311719	-2.29207e-16	1.72319	0.0873071	0.874015	-4.16273
SLC38A4	0.0861698	6.44646e-17	1.72225	0.0874775	0.874015	-4.1638
OR5AW1P	0.114265	-2.11301e-16	1.72222	0.0874841	0.874015	-4.16384
OR7E115P	0.134545	1.61161e-16	1.72199	0.0875248	0.874015	-4.1641
TP53TG3B	0.112338	1.11022e-16	1.72173	0.0875718	0.874015	-4.1644
GDF7	0.131058	-1.68324e-16	1.72156	0.0876029	0.874015	-4.16459
SNRPEP3	0.155682	-4.29764e-16	1.72096	0.0877134	0.874015	-4.16528
EXO5	0.120503	1.77278e-16	1.7209	0.0877241	0.874015	-4.16535
FAM131B	0.120911	-1.64743e-16	1.72083	0.0877368	0.874015	-4.16543
SEC11A	0.134172	-5.01391e-17	1.72028	0.0878365	0.874015	-4.16606
RPS26P2	0.125266	1.36092e-16	1.72018	0.0878543	0.874015	-4.16617
ZFAS1	0.134969	-1.75487e-16	1.72005	0.0878778	0.874015	-4.16632
IGLVI-68	0.0976675	-1.28929e-16	1.71999	0.0878892	0.874015	-4.16639
SH3BGRL2	0.209007	-1.75487e-16	1.71949	0.0879806	0.874015	-4.16696
FAM86JP	0.20603	-4.33345e-16	1.71944	0.0879898	0.874015	-4.16702
RPS26P34	0.104303	-1.77278e-16	1.71876	0.0881133	0.874015	-4.16779
APOC2	0.132543	-4.22601e-16	1.71792	0.0882671	0.874015	-4.16875
MTCYBP2	0.115612	-1.19976e-16	1.71769	0.0883105	0.874015	-4.16902
KSR2	0.142728	-4.11857e-16	1.7176	0.0883258	0.874015	-4.16911
UBE2V1P10	0.0917832	-1.07441e-17	1.71746	0.0883511	0.874015	-4.16927
PRDM15	0.121898	-7.879e-17	1.7174	0.0883625	0.874015	-4.16934
RNF44	0.109587	-1.75487e-16	1.71732	0.0883768	0.874015	-4.16943
PTAFR	0.124973	-3.33067e-16	1.71691	0.088453	0.874015	-4.1699
FXYD2	0.124422	-2.11301e-16	1.71682	0.0884683	0.874015	-4.17
HSPA9	0.245325	-5.37205e-16	1.71681	0.0884707	0.874015	-4.17001
SCAP	0.264768	2.00556e-16	1.71616	0.0885902	0.874015	-4.17075
WNT1	0.113086	-1.89812e-16	1.71611	0.0886	0.874015	-4.17082
PPBPP1	0.104443	2.11301e-16	1.71591	0.0886368	0.874015	-4.17104
MRPL39	0.185933	2.47114e-16	1.71591	0.0886368	0.874015	-4.17104
COX6CP1	0.132373	-1.89812e-16	1.71508	0.0887888	0.874658	-4.17199
ARHGAP21	0.194065	-3.90369e-16	1.71492	0.0888175	0.874658	-4.17216
CACUL1	0.121249	1.71906e-16	1.71449	0.0888973	0.874658	-4.17266
DLEC1P1	0.0960154	0	1.7142	0.0889504	0.874658	-4.17299
XRCC6	0.135247	6.23157e-16	1.71334	0.0891092	0.874658	-4.17397
HNRNPA1P63	0.115163	-3.9395e-17	1.71316	0.0891433	0.874658	-4.17418
MTND1P12	0.112128	8.59528e-17	1.71301	0.0891702	0.874658	-4.17434
CYP2J2	0.222981	3.11579e-16	1.71287	0.0891959	0.874658	-4.1745
FAM91A1	0.307448	4.11857e-16	1.71219	0.0893209	0.874658	-4.17527
DKC1	0.227994	-3.79625e-16	1.71194	0.0893676	0.874658	-4.17556
AKAP11	0.158838	-2.50696e-16	1.71164	0.089423	0.874658	-4.1759
HOXC-AS1	0.126818	1.36092e-16	1.71164	0.0894238	0.874658	-4.1759
COG5	0.128893	1.07441e-16	1.71152	0.0894462	0.874658	-4.17604
FAM229A	0.117742	-1.79068e-17	1.71123	0.0895001	0.874658	-4.17637
SMYD4	0.135974	1.27138e-16	1.71092	0.0895573	0.874658	-4.17672
IFNWP18	0.103426	-3.25904e-16	1.71074	0.0895909	0.874658	-4.17693
BRD7	0.149583	3.58136e-17	1.71056	0.0896241	0.874658	-4.17713
C2-AS1	0.106175	-2.86509e-17	1.7102	0.0896903	0.874658	-4.17754
MAL2	0.412199	3.83206e-16	1.70976	0.0897723	0.874658	-4.17804
CCNB1	0.175784	-1.68324e-16	1.70948	0.0898238	0.874658	-4.17835
BOLA3P2	0.13424	6.44646e-17	1.70932	0.0898528	0.874658	-4.17853
SLC9A6	0.139225	3.29486e-16	1.70927	0.0898622	0.874658	-4.17859
RPL38P4	0.162892	-3.47392e-16	1.70895	0.0899213	0.874665	-4.17895
OR13A1	0.114359	1.75487e-16	1.70888	0.0899352	0.874665	-4.17903
LMOD3	0.12034	1.8265e-16	1.70852	0.0900018	0.874665	-4.17944
VPS28	0.129725	-6.80459e-17	1.70839	0.0900254	0.874665	-4.17958
HLCS	0.0994249	-2.50696e-16	1.70829	0.0900441	0.874665	-4.1797
RPL23AP39	0.107	3.58136e-18	1.70824	0.090055	0.874665	-4.17976
MTHFD1	0.20316	8.23714e-17	1.70786	0.0901255	0.874727	-4.18019
CEBPZOS	0.154469	2.47114e-16	1.70701	0.0902834	0.875636	-4.18115
DMRTB1	0.109206	3.1516e-16	1.70679	0.0903249	0.875728	-4.18141
PP2D1	0.111427	-1.93394e-16	1.70608	0.0904566	0.875772	-4.18221
RPS5P3	0.0924298	2.97253e-16	1.70596	0.0904794	0.875772	-4.18235
RPS26	0.212173	-6.66134e-16	1.7057	0.0905272	0.875772	-4.18264
UBE2CP4	0.142124	-1.86231e-16	1.70562	0.0905434	0.875772	-4.18273
CIZ1	0.191443	-1.75487e-16	1.70523	0.0906151	0.876053	-4.18317
ZC2HC1C	0.1014	-8.95341e-17	1.70483	0.0906911	0.876466	-4.18363
ENGASE	0.1608	-1.71906e-16	1.7041	0.0908274	0.876684	-4.18445
RPS15AP1	0.23477	-1.3251e-16	1.70371	0.0909004	0.876684	-4.18489
GNL2	0.162187	-1.79068e-16	1.70314	0.0910075	0.876684	-4.18554
PDCD2L	0.2282	2.07719e-16	1.70298	0.0910372	0.876684	-4.18572
CUBN	0.170099	-5.37205e-17	1.70289	0.0910544	0.876684	-4.18582
PKIA-AS1	0.1362	-1.43255e-16	1.70265	0.0910996	0.876684	-4.18609
GRTP1	0.161692	3.04416e-16	1.70205	0.0912129	0.876684	-4.18678
ZC3H12D	0.114913	-2.47114e-16	1.70169	0.0912802	0.876684	-4.18718
DNAJC15	0.220528	2.65021e-16	1.70141	0.0913329	0.876684	-4.1875
NDUFB6	0.212304	-2.14882e-16	1.70135	0.0913438	0.876684	-4.18756
FOCAD	0.165943	2.29207e-16	1.70067	0.0914718	0.876684	-4.18833
TMEM233	0.131079	-1.61161e-16	1.70042	0.0915192	0.876684	-4.18861
CDC14B	0.19598	1.48627e-16	1.70013	0.091573	0.876684	-4.18894
RNF114	0.18479	1.18185e-16	1.6996	0.0916727	0.876684	-4.18953
SCARNA6	0.185847	-4.04694e-16	1.69959	0.0916763	0.876684	-4.18955
ZNF718	0.127014	-2.65021e-16	1.69929	0.0917323	0.876684	-4.18989
CBLL1	0.173801	1.53999e-16	1.69902	0.0917836	0.876684	-4.1902
TPT1P10	0.128107	7.16273e-17	1.69899	0.0917894	0.876684	-4.19023
PPM1G	0.181161	-1.79068e-17	1.69892	0.0918015	0.876684	-4.1903
GOT2	0.196991	1.93394e-16	1.69883	0.0918184	0.876684	-4.1904
TOR1B	0.126459	5.73018e-17	1.69859	0.0918652	0.876684	-4.19068
ATP8B3	0.121998	1.79068e-16	1.69854	0.0918746	0.876684	-4.19074
MRPL34	0.143074	2.07719e-16	1.69815	0.0919469	0.876684	-4.19117
ZRANB2	0.179598	-3.86787e-16	1.69759	0.0920533	0.876684	-4.1918
KRT8P43	0.0984275	1.00278e-16	1.69747	0.0920755	0.876684	-4.19194
SLC25A5P2	0.122663	1.71906e-16	1.6973	0.0921085	0.876684	-4.19213
FBXW9	0.13033	1.79068e-16	1.69721	0.0921254	0.876684	-4.19223
NMNAT1P2	0.113374	1.16394e-16	1.69699	0.0921677	0.876781	-4.19248
RPL39P18	0.165618	4.15438e-16	1.69641	0.0922769	0.877515	-4.19313
MXD3	0.105864	-8.59528e-17	1.69572	0.092408	0.878455	-4.19391
OSR2	0.133175	3.22323e-17	1.69479	0.0925848	0.878606	-4.19496
MED4	0.182804	-2.43533e-16	1.69433	0.0926738	0.878622	-4.19548
KRT18P20	0.0988387	1.21766e-16	1.69425	0.0926882	0.878622	-4.19557
PMS2	0.153722	-1.46836e-16	1.69416	0.0927054	0.878622	-4.19567
SLC25A21-AS1	0.115388	-1.8444e-16	1.69347	0.0928376	0.878622	-4.19645
YTHDF2	0.145763	-2.25626e-16	1.69344	0.0928418	0.878622	-4.19648
RPP38	0.148125	2.79346e-16	1.69331	0.0928669	0.878622	-4.19662
TUBGCP4	0.218368	1.07441e-16	1.69322	0.0928853	0.878622	-4.19673
SPRYD4	0.102207	1.86231e-16	1.6931	0.0929082	0.878622	-4.19687
SMYD3	0.137668	-3.72462e-16	1.69275	0.0929752	0.87895	-4.19726
CRB3	0.0926531	-3.1516e-16	1.692	0.0931185	0.879646	-4.19811
CENPO	0.161643	-1.75487e-16	1.69186	0.0931449	0.879646	-4.19826
ENPP6	0.119493	5.37205e-18	1.69168	0.0931791	0.879646	-4.19846
FANCD2	0.18088	3.65299e-16	1.69118	0.0932742	0.879646	-4.19902
GPER1	0.14483	3.9395e-17	1.69068	0.0933707	0.879646	-4.19959
APOC1	0.377791	0	1.69039	0.0934256	0.879646	-4.19991
PSME2	0.201675	-3.43811e-16	1.6902	0.0934614	0.879646	-4.20012
NOL9	0.172022	-2.86509e-17	1.68994	0.0935118	0.879646	-4.20041
CDRT15L2	0.101252	1.61161e-16	1.6897	0.0935574	0.879646	-4.20068
RPL7P7	0.155094	7.879e-17	1.68882	0.0937275	0.879646	-4.20167
ZFYVE16	0.160414	1.68324e-16	1.68881	0.0937284	0.879646	-4.20168
UTP4	0.216284	-3.58136e-17	1.6887	0.0937506	0.879646	-4.20181
SNORA64	0.179207	8.59528e-17	1.68862	0.0937655	0.879646	-4.2019
IGLVVI-25-1	0.125058	2.50696e-17	1.68803	0.0938782	0.879912	-4.20255
GNG5P2	0.157021	-2.00556e-16	1.68759	0.0939631	0.879912	-4.20305
BCRP3	0.128901	2.14882e-17	1.68729	0.0940224	0.879912	-4.20339
TSPAN17	0.159335	-2.04138e-16	1.68648	0.094177	0.879912	-4.20429
OR10AD1	0.124318	-7.16273e-18	1.68645	0.0941839	0.879912	-4.20433
PLK4	0.241396	1.0565e-16	1.68588	0.094293	0.879912	-4.20496
RPL9P3	0.141061	-9.31155e-17	1.68527	0.0944121	0.879912	-4.20565
KRT37	0.102565	-3.18741e-16	1.68461	0.09454	0.879912	-4.2064
CEP162	0.0926257	-3.68881e-16	1.68458	0.0945443	0.879912	-4.20642
HSPE1P5	0.143693	1.71906e-16	1.68438	0.0945844	0.879912	-4.20665
ARL9	0.128774	1.79068e-17	1.68435	0.0945893	0.879912	-4.20668
ANXA7	0.120694	-3.9395e-16	1.68382	0.0946931	0.879912	-4.20728
RAB36	0.109691	1.75487e-16	1.68367	0.0947211	0.879912	-4.20744
DDX50	0.135382	3.00835e-16	1.68322	0.0948085	0.879912	-4.20795
PLPP6	0.105558	-2.75765e-16	1.68297	0.0948574	0.879912	-4.20823
MPL	0.0826328	1.80859e-16	1.68293	0.0948641	0.879912	-4.20827
RPL5P34	0.141012	3.22323e-17	1.68262	0.0949255	0.879912	-4.20862
DEFB119	0.110061	-5.01391e-17	1.68238	0.0949717	0.879912	-4.20889
OR52Q1P	0.11462	1.3072e-16	1.68217	0.0950122	0.879912	-4.20912
QRSL1P2	0.0998215	-1.5758e-16	1.68205	0.0950356	0.879912	-4.20925
HECA	0.0994798	9.31155e-17	1.68201	0.095044	0.879912	-4.2093
KRTAP4-7	0.114833	-3.86787e-16	1.68128	0.0951861	0.879912	-4.21012
SNRPD2	0.221481	1.28929e-16	1.68102	0.095237	0.879912	-4.21041
CASP10	0.217297	-1.46836e-16	1.68023	0.0953895	0.880256	-4.21128
RPL10A	0.196925	4.15438e-16	1.67755	0.0959147	0.88248	-4.21428
SNORD70	0.315611	1.79068e-17	1.67739	0.095946	0.88248	-4.21446
PCA3	0.0991667	1.96975e-16	1.67693	0.0960358	0.88248	-4.21497
SP140L	0.225602	1.75487e-16	1.67684	0.0960528	0.88248	-4.21507
CACNA1B	0.129936	-1.07441e-17	1.6768	0.0960611	0.88248	-4.21512
PHACTR2P1	0.104103	-1.50417e-16	1.67668	0.0960839	0.88248	-4.21525
MORF4L2-AS1	0.117214	-2.14882e-16	1.67654	0.0961121	0.88248	-4.21541
TESK2	0.148134	-1.28929e-16	1.67591	0.0962354	0.88248	-4.21611
CCDC92B	0.101452	-3.65299e-16	1.67576	0.0962656	0.88248	-4.21628
TRAV8-1	0.10369	3.54555e-16	1.67511	0.0963923	0.88248	-4.217
GPR137	0.104676	-6.44646e-17	1.67485	0.0964432	0.88248	-4.21728
GLRX3	0.276326	3.83206e-16	1.67427	0.0965583	0.88248	-4.21794
ERLIN2	0.152317	-2.93672e-16	1.67416	0.096579	0.88248	-4.21805
WWP1	0.130549	-1.09232e-16	1.67416	0.0965797	0.88248	-4.21806
SCML1	0.223942	-1.09232e-16	1.67414	0.0965828	0.88248	-4.21807
MDH2	0.206003	1.96975e-16	1.6741	0.0965922	0.88248	-4.21813
PDZK1IP1	0.282723	4.08276e-16	1.67383	0.0966441	0.88248	-4.21842
RPL3P5	0.123582	3.86787e-16	1.67336	0.096737	0.88248	-4.21895
MOCS3	0.165367	2.11301e-16	1.67307	0.0967945	0.88248	-4.21927
SH3GL2	0.0919281	-2.50696e-17	1.67306	0.096796	0.88248	-4.21928
MTND2P31	0.142197	8.95341e-17	1.6729	0.0968291	0.88248	-4.21946
PRELID1	0.232346	4.11857e-16	1.67257	0.0968926	0.88248	-4.21982
SEMA6A	0.217749	-1.64743e-16	1.67247	0.096913	0.88248	-4.21994
SEPSECS	0.164697	1.34301e-16	1.67232	0.0969432	0.88248	-4.22011
KCNS2	0.102254	7.16273e-17	1.67208	0.0969905	0.88248	-4.22037
FERMT1	0.299523	1.79068e-16	1.6716	0.0970853	0.88248	-4.22091
AMBP	0.0920715	9.31155e-17	1.67124	0.0971565	0.88248	-4.22131
EIF2AK1	0.24559	2.57858e-16	1.67099	0.0972053	0.88248	-4.22158
IGHV3-41	0.099315	1.00278e-16	1.67098	0.0972076	0.88248	-4.22159
DEFB117	0.114427	-1.12813e-16	1.67072	0.0972598	0.88248	-4.22189
ATG3	0.17308	-3.22323e-17	1.67038	0.0973258	0.88248	-4.22226
RPE	0.140366	-7.52087e-17	1.67033	0.0973357	0.88248	-4.22231
KRBA1	0.10109	-2.04138e-16	1.67029	0.097345	0.88248	-4.22236
PDCD5P1	0.17203	-2.07719e-16	1.67028	0.0973468	0.88248	-4.22237
OXLD1	0.145172	-4.44089e-16	1.67023	0.0973565	0.88248	-4.22243
RPS2P7	0.0991982	5.73018e-17	1.67002	0.0973982	0.88248	-4.22266
PWWP2B	0.114774	4.36926e-16	1.66966	0.0974699	0.88248	-4.22306
RSL1D1	0.193649	2.86509e-17	1.66842	0.0977164	0.88248	-4.22444
DEFB4A	0.125913	2.14882e-16	1.66832	0.0977347	0.88248	-4.22454
PLEKHH3	0.111671	-2.14882e-17	1.6683	0.0977387	0.88248	-4.22456
POU2F3	0.133281	4.40508e-16	1.66822	0.0977562	0.88248	-4.22466
SLCO4C1	0.114487	-6.26739e-17	1.66804	0.0977914	0.88248	-4.22486
SPATA2	0.113566	1.93394e-16	1.66797	0.0978056	0.88248	-4.22494
ZNF157	0.0946044	1.46836e-16	1.66779	0.0978401	0.88248	-4.22513
L3MBTL2	0.110244	1.0386e-16	1.66768	0.0978637	0.88248	-4.22526
ATXN7L2	0.127277	8.23714e-17	1.66761	0.0978769	0.88248	-4.22534
FAM86KP	0.103956	-1.43255e-17	1.66727	0.0979442	0.88248	-4.22571
RPL18AP14	0.148227	2.22045e-16	1.66702	0.0979935	0.88248	-4.22598
PDYN	0.0950121	6.44646e-17	1.66698	0.0980027	0.88248	-4.22604
GALNT15	0.104884	-1.5758e-16	1.66626	0.0981461	0.88248	-4.22683
SYTL3	0.140556	-1.64743e-16	1.66611	0.0981747	0.88248	-4.22699
OR7E13P	0.12088	-8.59528e-17	1.66535	0.0983276	0.88248	-4.22784
GORASP1	0.137733	4.01113e-16	1.66529	0.0983402	0.88248	-4.22791
TMEM64	0.170839	2.11301e-16	1.66519	0.0983603	0.88248	-4.22802
TMEM63A	0.206935	-4.15438e-16	1.66463	0.0984716	0.88248	-4.22864
MUC12	0.14099	-3.72462e-16	1.66456	0.0984863	0.88248	-4.22872
LRRC8D	0.184221	2.3637e-16	1.66455	0.0984884	0.88248	-4.22873
ANXA4	0.16216	1.36092e-16	1.66436	0.0985259	0.88248	-4.22894
IGHV1OR15-9	0.100389	2.50696e-17	1.66432	0.0985334	0.88248	-4.22898
CCT5P2	0.0950792	-1.0565e-16	1.66376	0.0986461	0.88248	-4.2296
MYH1	0.116312	3.9395e-17	1.66331	0.0987367	0.88248	-4.2301
POM121L12	0.098174	-2.14882e-16	1.66326	0.0987456	0.88248	-4.23015
CPSF4	0.140422	7.52087e-17	1.66317	0.0987647	0.88248	-4.23026
OXSR1	0.152188	-4.15438e-16	1.66311	0.0987749	0.88248	-4.23031
LSM5	0.187842	-2.50696e-16	1.66294	0.0988107	0.88248	-4.23051
LPCAT2	0.155066	-1.07441e-16	1.66229	0.09894	0.88248	-4.23122
NDE1	0.155563	1.21766e-16	1.66208	0.0989822	0.88248	-4.23145
OAZ3	0.126924	1.21766e-16	1.6617	0.0990589	0.88248	-4.23188
OR2W4P	0.101313	2.29207e-16	1.66133	0.0991334	0.88248	-4.23229
MDH1	0.19353	-2.65021e-16	1.66112	0.0991762	0.88248	-4.23252
CEP85L	0.109578	-1.79068e-16	1.66006	0.0993882	0.88248	-4.23368
IGLV1-36	0.175098	4.29764e-17	1.66001	0.0993986	0.88248	-4.23374
ZNF440	0.1568	-1.5758e-16	1.65994	0.0994125	0.88248	-4.23382
SNX3	0.175468	-2.14882e-16	1.65972	0.0994572	0.88248	-4.23406
ZNF75D	0.13464	-5.19298e-17	1.65933	0.0995362	0.88248	-4.23449
RPL12P14	0.154308	-1.50417e-16	1.65925	0.0995529	0.88248	-4.23459
MUC6	0.186491	2.11301e-16	1.6585	0.0997046	0.88248	-4.23541
IRF2BP2	0.136143	3.36648e-16	1.65837	0.0997305	0.88248	-4.23556
SDHD	0.137436	-1.89812e-16	1.65822	0.0997602	0.88248	-4.23572
FAM32A	0.146302	2.72184e-16	1.65821	0.0997636	0.88248	-4.23574
RPS15AP40	0.131673	9.84875e-17	1.65738	0.0999314	0.88248	-4.23665
HELZ	0.131786	-1.14604e-16	1.65695	0.100018	0.88248	-4.23712
MRPS33P3	0.106104	-1.79068e-17	1.65688	0.100031	0.88248	-4.23719
PIGFP1	0.0985387	1.64743e-16	1.65684	0.100039	0.88248	-4.23724
PHF6	0.163665	2.86509e-17	1.65666	0.100077	0.88248	-4.23744
DUX4L8	0.10086	2.14882e-16	1.65659	0.10009	0.88248	-4.23751
CDC6	0.198301	3.22323e-16	1.65604	0.100202	0.88248	-4.23812
PTMAP8	0.132031	-2.43533e-16	1.65588	0.100234	0.88248	-4.2383
MAGOH2P	0.127623	-7.879e-17	1.65584	0.100243	0.88248	-4.23835
PROB1	0.11645	-4.22601e-16	1.65513	0.100387	0.88248	-4.23912
RPEP5	0.105219	2.11301e-16	1.65508	0.100396	0.88248	-4.23918
UQCRH	0.26343	-1.14604e-16	1.65507	0.100399	0.88248	-4.23919
TPST1	0.100756	-8.59528e-17	1.65494	0.100425	0.88248	-4.23933
SYT8	0.109253	2.54277e-16	1.65491	0.100432	0.88248	-4.23937
LUCAT1	0.122058	4.29764e-17	1.65472	0.100469	0.88248	-4.23957
CTU1	0.118151	2.54277e-16	1.65466	0.100483	0.88248	-4.23965
ZNF3	0.112538	-3.04416e-16	1.65451	0.100513	0.88248	-4.23981
[truncated: 25,303 more rows]

## Sheet: DE
Gene	logFC	AveExpr	t	P.Value	adj.P.Val	B
PIEZO2	1.11355	8.95341e-17	6.43657	2.32202e-09	6.33959e-05	10.3812
SLIT3	1.05186	-1.53999e-16	5.76666	5.89184e-08	0.000804295	7.56879
OLFML2B	0.79542	-4.15438e-16	5.66265	9.57478e-08	0.000871369	7.14646
CYP1B1	0.918492	-1.75487e-16	5.314	4.70418e-07	0.00223056	5.76248
SNORD113-4	1.12869	-2.00556e-16	5.2903	5.23101e-07	0.00223056	5.67025
DZIP1	0.637138	1.14604e-16	5.28148	5.44138e-07	0.00223056	5.63599
SNORD113-2	0.738414	1.07441e-17	5.24165	6.49861e-07	0.00223056	5.48174
COPZ2	1.139	-4.29764e-17	5.24036	6.53595e-07	0.00223056	5.47676
SFRP2	1.91767	2.25626e-16	5.13567	1.03838e-06	0.00315	5.07472
SNORD114-25	1.21951	2.57858e-16	4.99581	1.91066e-06	0.00521649	4.54547
TGFB3	1.28784	3.47392e-16	4.95207	2.30733e-06	0.0057268	4.38184
LOX	1.16111	-8.23714e-17	4.85741	3.45846e-06	0.00786857	4.03092
XGY2	1.43843	3.58136e-17	4.81306	4.17368e-06	0.00876537	3.86802
FBN1	0.743889	-2.93672e-16	4.78103	4.77741e-06	0.00931664	3.75098
SNORD113-1	0.896167	-5.01391e-17	4.71371	6.33465e-06	0.0115299	3.50666
BICC1	0.831496	-4.22601e-16	4.64845	8.30688e-06	0.0141746	3.27208
SNORD114-28	0.57848	-2.43533e-16	4.63297	8.85562e-06	0.0142221	3.21674
VGLL3	0.779197	-3.58136e-18	4.51835	1.41587e-05	0.0214757	2.81102
SLC2A3P2	0.528021	1.0565e-16	4.5043	1.49893e-05	0.0215388	2.76177
SNORD114-21	0.74817	-2.68602e-17	4.49046	1.58537e-05	0.0215697	2.71334
HTRA1	0.668382	-3.18741e-16	4.46903	1.72871e-05	0.0215697	2.63858
ITGBL1	0.794349	7.879e-17	4.46769	1.73809e-05	0.0215697	2.63391
COL24A1	0.706706	-2.25626e-16	4.4283	2.03631e-05	0.0231365	2.4972
MFAP5	0.606239	-1.50417e-16	4.42712	2.046e-05	0.0231365	2.4931
CPXM1	0.472991	3.58136e-17	4.40383	2.2458e-05	0.0231365	2.41269
SNORD114-22	0.679721	-1.21766e-16	4.39438	2.33216e-05	0.0231365	2.38013
PTPN14	0.592009	-5.73018e-17	4.38945	2.3785e-05	0.0231365	2.36316
TSPAN2	0.629283	1.00278e-16	4.38931	2.37984e-05	0.0231365	2.36267
LOXL1	1.03833	1.93394e-16	4.38124	2.45755e-05	0.0231365	2.33495
LAMA2	0.83068	1.71906e-16	4.36738	2.59686e-05	0.0236331	2.2874
ABCA8	0.645503	-3.1516e-16	4.35445	2.73357e-05	0.0240748	2.24315
SNORD114-5	0.431357	5.73018e-17	4.34305	2.85988e-05	0.0244002	2.2042
MFAP2	0.834264	-2.18463e-16	4.31913	3.14338e-05	0.0260062	2.12272
TRPC1	0.71716	-1.07441e-16	4.25398	4.05926e-05	0.0325959	1.90242
PRRX1	0.940559	3.58136e-17	4.2458	4.19087e-05	0.0326912	1.87495
PALMD	0.65972	-3.22323e-16	4.2171	4.68596e-05	0.0355378	1.77883
BNC2	0.976623	1.8265e-16	4.15968	5.85039e-05	0.0431695	1.5879
CTSK	0.962714	-2.72184e-16	4.13783	6.36238e-05	0.0457121	1.51577
SPOCK1	0.699103	1.89812e-16	4.09691	7.4393e-05	0.0494368	1.38139
FGFR1	0.666178	3.86787e-16	4.09537	7.48299e-05	0.0494368	1.37636
NHSL2	0.629998	1.89812e-16	4.09431	7.51339e-05	0.0494368	1.37288
MEG3	0.571497	-3.65299e-16	4.09112	7.6051e-05	0.0494368	1.36246
PRDM6	0.478926	-1.00278e-16	4.05786	8.62795e-05	0.0525038	1.2541
DSEL	0.592968	-1.18185e-16	4.05484	8.72711e-05	0.0525038	1.24429
PLSCR4	0.571717	3.47392e-16	4.04977	8.89605e-05	0.0525038	1.22783
BGN	1.2287	-3.4023e-16	4.04947	8.90609e-05	0.0525038	1.22687
ADAMTS16	1.23048	4.26182e-16	4.03546	9.38973e-05	0.0525038	1.18148
CCDC80	0.884886	-2.3637e-16	4.03435	9.42894e-05	0.0525038	1.17791
GGT5	0.416303	0	4.02932	9.60936e-05	0.0525038	1.16164
LGALS1	0.856609	-3.29486e-16	4.02915	9.61538e-05	0.0525038	1.16111
IGFL1P1	0.621204	-7.16273e-18	3.99927	0.000107578	0.0557271	1.06481
SNORD114-20	0.663899	1.8265e-16	3.99777	0.00010818	0.0557271	1.06002
ATP2B4	0.699816	-2.50696e-16	3.97289	0.000118727	0.056476	0.980265
LUM	1.25865	1.18185e-16	3.97189	0.000119171	0.056476	0.977066
MEIS3	0.625482	3.97531e-16	3.96581	0.000121902	0.056476	0.957648
SNORD114-30	0.644849	1.88022e-16	3.95604	0.000126415	0.056476	0.926493
COL10A1	0.953208	3.65299e-16	3.95462	0.000127084	0.056476	0.921971
BMPR1B	0.456942	9.66968e-17	3.95214	0.000128261	0.056476	0.914072
FAP	1.36319	-1.07441e-16	3.94785	0.00013032	0.056476	0.90043
NR2F1-AS1	0.690725	-1.11022e-16	3.93367	0.000137361	0.0585974	0.855354
CD248	0.712336	-4.01113e-16	3.91548	0.000146921	0.0617114	0.797739
TNFAIP6	0.859022	2.39951e-16	3.88852	0.000162264	0.0654807	0.712722
ADAMTSL4	0.402158	-3.9395e-17	3.88473	0.000164539	0.0654807	0.700805
SPARC	1.08444	3.00835e-16	3.88447	0.000164697	0.0654807	0.699985
GFPT2	0.643567	1.79068e-16	3.88316	0.000165488	0.0654807	0.695884
VCAN-AS1	0.748263	2.0951e-16	3.87003	0.000173657	0.0677313	0.654664
OGN	0.94157	8.23714e-17	3.83942	0.000194204	0.0746784	0.55904
CACNA1C-IT3	0.64903	1.86231e-16	3.82187	0.000207011	0.077422	0.504462
AASS	0.472488	-4.29764e-16	3.81185	0.000214678	0.0782409	0.473386
DLG4	0.512565	-2.04138e-16	3.81152	0.000214932	0.0782409	0.472379
OMD	0.617333	1.80859e-16	3.8045	0.000220472	0.0788765	0.450639
SNORD113-9	0.419603	-1.8265e-16	3.80202	0.000222456	0.0788765	0.442986
SNORD114-2	0.53777	4.29764e-17	3.7961	0.00022727	0.0795503	0.424701
ST6GAL2	1.46082	-2.57858e-16	3.79232	0.000230397	0.0796241	0.41303
RDX	1.02768	2.6144e-16	3.78045	0.000240486	0.0820717	0.376439
PLXDC2	0.964685	-6.08832e-17	3.7634	0.000255703	0.085287	0.324067
NOX4	0.586154	-2.18463e-16	3.76006	0.000258786	0.085287	0.31384
LRRC17	0.767953	-2.86509e-17	3.75299	0.000265443	0.0862753	0.292169
ACTA2	1.00813	-2.86509e-17	3.74414	0.000273996	0.0880074	0.265115
COL6A3	0.913417	1.25348e-16	3.72317	0.000295325	0.0916219	0.201187
COL1A1	0.633907	-7.879e-17	3.72251	0.000296017	0.0916219	0.19919
AEBP1	0.803915	-1.86231e-16	3.71985	0.000298839	0.0916219	0.191102
HYDIN2	0.542805	1.14604e-16	3.71687	0.000302028	0.0916219	0.182052
CTHRC1	0.851976	-4.22601e-16	3.70508	0.000314968	0.0938668	0.146294
EDNRA	0.926312	-3.36648e-16	3.70389	0.000316304	0.0938668	0.142687
ADAMTS9-AS2	0.532157	8.95341e-17	3.69902	0.000321825	0.094478	0.127944
SRSF1P1	0.320823	1.43255e-16	3.69232	0.000329577	0.0947169	0.107663
EPYC	0.997968	1.95184e-16	3.68778	0.000334925	0.0952514	0.0939491
FSTL1	0.585255	-1.89812e-16	3.67886	0.000345667	0.0972928	0.0670598
C3	1.20676	-4.22601e-16	3.64762	0.000385932	0.105367	-0.0267458
MEDAG	0.97696	9.31155e-17	3.6415	0.000394327	0.1056	-0.0450581
RUNX1T1	0.539456	-1.43255e-17	3.63131	0.000408675	0.1056	-0.075463
GLI3	0.603623	7.16273e-17	3.62857	0.000412617	0.1056	-0.0836281
PLN	0.468923	5.73018e-17	3.62777	0.000413784	0.1056	-0.0860313
RNF144A	0.502579	2.6144e-16	3.62771	0.000413861	0.1056	-0.08619
CLDN11	0.475518	-2.86509e-16	3.61937	0.000426125	0.107723	-0.111025
COL1A2	0.688591	2.86509e-17	3.60762	0.000443986	0.111208	-0.145938
MXRA5	0.679485	-3.43811e-16	3.59823	0.000458768	0.113451	-0.173777
EFEMP1	0.953917	3.9395e-17	3.59668	0.000461249	0.113451	-0.178362
PYGO1	0.507256	2.18463e-16	3.59084	0.000470712	0.114744	-0.195619
CNTN4	0.461051	-1.07441e-16	3.5827	0.000484228	0.116995	-0.219673
FRMD6	0.587085	3.54555e-16	3.56914	0.000507543	0.118402	-0.259617
PCDH7	0.80729	2.50696e-17	3.5686	0.000508493	0.118402	-0.261205
GXYLT2	0.686884	-3.43811e-16	3.56752	0.000510402	0.118402	-0.264388
GEM	0.366795	3.29486e-16	3.56676	0.000511738	0.118402	-0.266607
SERPINF1	0.936887	-1.3251e-16	3.55994	0.000523965	0.120213	-0.286657
INHBA	0.779693	0	3.54756	0.000546847	0.123389	-0.322942
IGFBP5	0.767281	3.29486e-16	3.54384	0.000553908	0.123957	-0.333831
BASP1	0.541628	3.36648e-16	3.53468	0.000571653	0.125732	-0.360588
RASSF2	0.522865	-1.28929e-16	3.53178	0.000577384	0.125732	-0.369051
DNAH17-AS1	0.304448	-1.25348e-16	3.53033	0.000580261	0.125732	-0.373268
LAYN	0.370658	1.36092e-16	3.52441	0.00059219	0.126313	-0.39053
MGP	0.769405	-1.3072e-16	3.52185	0.000597406	0.126313	-0.397967
CCDC8	0.40842	2.00556e-16	3.51305	0.000615708	0.126313	-0.423558
NR4A3	0.696504	0	3.51259	0.000616691	0.126313	-0.424911
CERCAM	0.474618	2.54277e-16	3.51139	0.00061923	0.126313	-0.428395
KCNT2	0.581848	1.64743e-16	3.51105	0.000619953	0.126313	-0.429384
CSGALNACT2	0.57124	-1.71906e-16	3.50673	0.000629176	0.127243	-0.441904
TAGLN	0.658105	-4.29764e-17	3.50047	0.000642787	0.129039	-0.460046
SFRP4	1.34762	8.23714e-17	3.49368	0.00065787	0.130469	-0.479704
VCAN	0.936911	2.14882e-16	3.49297	0.000659465	0.130469	-0.481757
NISCH	0.666515	3.54555e-16	3.48711	0.000672771	0.132144	-0.498683
TENM4	0.389302	-5.01391e-17	3.47942	0.000690609	0.133774	-0.520853
MAST4-IT1	0.477475	-1.91603e-16	3.4783	0.000693251	0.133774	-0.524087
UBE2Q2P6	0.479296	-1.64743e-16	3.47723	0.00069577	0.133774	-0.52716
FAM133CP	0.793878	-3.61718e-16	3.47056	0.000711737	0.135887	-0.546376
HECTD2	0.563303	9.66968e-17	3.45842	0.00074164	0.138696	-0.581224
HTR2A	0.480399	-1.21766e-16	3.45841	0.000741688	0.138696	-0.581279
COL14A1	0.736747	1.61161e-16	3.45155	0.000759102	0.140648	-0.600924
STEAP4	0.708539	-1.18185e-16	3.45026	0.000762433	0.140648	-0.604629
PIK3R5	0.466394	2.86509e-16	3.4469	0.00077112	0.141296	-0.614218
ARL4C	0.606832	-3.29486e-16	3.43658	0.000798471	0.145332	-0.643709
FERMT2	0.517898	-3.58136e-17	3.43357	0.000806622	0.145844	-0.652301
CHST15	0.574799	3.22323e-16	3.42643	0.000826249	0.14744	-0.672635
PODNL1	0.417802	2.50696e-17	3.42407	0.000832835	0.14765	-0.67935
FBLN5	0.63013	6.80459e-17	3.41967	0.000845263	0.148886	-0.691876
THBS2	0.804229	-1.71906e-16	3.40575	0.000885683	0.152119	-0.731364
PLPP4	0.634747	2.3637e-16	3.40327	0.000893066	0.152119	-0.73838
APOD	1.17207	5.01391e-17	3.39836	0.000907864	0.152119	-0.752268
TSPYL2	0.400328	2.79346e-16	3.39825	0.000908189	0.152119	-0.75257
MMP2	0.693739	7.16273e-18	3.39536	0.000917011	0.15266	-0.760739
C1R	0.583314	1.3251e-16	3.37933	0.000967434	0.158121	-0.805953
ALPK2	0.43974	-8.23714e-17	3.3682	0.00100394	0.160843	-0.83723
CPE	0.528976	9.84875e-17	3.36717	0.0010074	0.160843	-0.840134
GUCY1A2	0.533865	4.65577e-17	3.35349	0.0010542	0.164468	-0.878457
ASAP3	0.391042	7.879e-17	3.33192	0.00113213	0.172168	-0.938612
CYP7B1	0.525109	1.68324e-16	3.32911	0.00114268	0.172168	-0.946429
KLF9	0.434188	-1.93394e-16	3.32778	0.0011477	0.172168	-0.950129
LSAMP	0.387411	1.11022e-16	3.3246	0.00115981	0.173033	-0.958971
MYOF	0.587388	1.43255e-16	3.31628	0.00119201	0.176316	-0.982051
POSTN	0.945922	-1.61161e-16	3.31558	0.00119473	0.176316	-0.983974
EML1	0.366715	6.26739e-17	3.30475	0.00123799	0.180746	-1.01394
CDR1	0.878649	-4.1902e-16	3.30274	0.0012462	0.180978	-1.01951
RBMS1	0.56553	-1.21766e-16	3.29816	0.00126505	0.182743	-1.03216
ZNF532	0.80515	-4.1902e-16	3.29058	0.00129682	0.185135	-1.05304
DCLK1	0.549529	-7.16273e-18	3.28874	0.00130465	0.185135	-1.05811
LIX1L	0.405832	2.90091e-16	3.28378	0.00132595	0.185135	-1.07174
SNAI2	0.761908	3.54555e-16	3.28153	0.00133572	0.185135	-1.07792
UBE2E2	0.560401	2.97253e-16	3.28023	0.00134139	0.185135	-1.08149
CFAP54	0.631643	9.49062e-17	3.27754	0.00135323	0.185135	-1.08888
SNORD114-9	0.289306	2.50696e-17	3.27552	0.00136217	0.185135	-1.09443
NRP2	0.933046	-3.97531e-16	3.2744	0.00136715	0.185135	-1.0975
GPX8	0.644424	-2.65021e-16	3.27382	0.00136973	0.185135	-1.09908
ANXA1	0.837477	-1.43255e-17	3.27382	0.00136977	0.185135	-1.0991
AKAP12	0.939915	-5.37205e-17	3.25906	0.00143711	0.192962	-1.13948
SNORD113-6	0.457055	1.79068e-16	3.25806	0.00144181	0.192962	-1.14223
LY96	0.753062	-3.33067e-16	3.24708	0.00149408	0.196516	-1.17217
ABCC9	0.897854	-9.84875e-17	3.24614	0.00149861	0.196516	-1.17472
HMCN1	0.395398	-1.62952e-16	3.24438	0.00150721	0.196516	-1.17953
CRMP1	0.46686	-3.79625e-16	3.24402	0.00150896	0.196516	-1.1805
LCA5	0.369238	1.8444e-16	3.24379	0.00151008	0.196516	-1.18112
SULF1	0.877993	-6.44646e-17	3.2431	0.00151344	0.196516	-1.18299
ADAM3B	0.50276	-3.22323e-17	3.23737	0.00154175	0.197629	-1.19857
ZNF300P1	0.305744	-3.22323e-17	3.23736	0.00154183	0.197629	-1.19861
PLPPR4	0.590197	-2.13091e-16	3.23415	0.0015579	0.198756	-1.20732
ZEB1	0.668998	-8.59528e-17	3.23262	0.00156559	0.198808	-1.21146
GOLGA8Q	0.396006	3.25904e-16	3.22749	0.00159176	0.199675	-1.22539
TCF4	0.683113	-1.79068e-16	3.22698	0.00159436	0.199675	-1.22676
PRKD1	0.715463	-1.18185e-16	3.21743	0.00164418	0.203361	-1.2526
SPTLC3	0.496268	1.89812e-16	3.21706	0.00164613	0.203361	-1.2536
CDKN2B	0.274622	-3.50974e-16	3.21542	0.00165488	0.20352	-1.25805
FNDC1-IT1	0.43062	2.50696e-17	3.21159	0.00167536	0.205115	-1.26838
THY1	0.599891	-1.86231e-16	3.20811	0.00169421	0.205579	-1.27777
MXRA8	0.594614	-2.00556e-16	3.20528	0.00170966	0.206536	-1.28539
TM6SF1	0.386622	2.97253e-16	3.19727	0.00175418	0.208328	-1.30696
COL5A1	0.595959	-4.65577e-17	3.19713	0.00175494	0.208328	-1.30733
PDLIM3	0.302378	-1.5758e-16	3.19562	0.00176347	0.208425	-1.31139
SHOX2	0.38687	1.09232e-16	3.18981	0.00179654	0.209796	-1.32698
GYPC	0.419883	1.28929e-16	3.18913	0.00180044	0.209796	-1.3288
IGKV3-11	0.700297	-6.44646e-17	3.18742	0.00181035	0.209796	-1.3334
DZIP3	0.319245	-8.23714e-17	3.18688	0.00181348	0.209796	-1.33486
THBS1	0.570463	-1.71906e-16	3.17912	0.00185896	0.214149	-1.35563
ISM1	0.355885	-4.29764e-17	3.17647	0.00187474	0.21506	-1.36271
TIGD6	0.322664	-1.64743e-16	3.17103	0.00190754	0.217906	-1.37725
C7	0.400871	-1.39673e-16	3.1668	0.00193342	0.219894	-1.38855
VSTM4	0.612314	-2.50696e-16	3.16556	0.00194105	0.219894	-1.39185
PRG4	0.429815	-1.12813e-16	3.14874	0.00204751	0.227664	-1.43658
CEACAMP11	0.35916	-2.04138e-16	3.14372	0.00208034	0.229021	-1.4499
PACS1	0.243276	-3.86787e-16	3.13866	0.00211395	0.230904	-1.46332
NAV1	0.640821	-2.22045e-16	3.1367	0.00212707	0.231368	-1.4685
OR52E3P	0.291362	3.22323e-17	3.12849	0.00218295	0.235693	-1.49021
MDFIC	0.635941	-3.07997e-16	3.12783	0.0021875	0.235693	-1.49195
SYNPO	0.350073	-3.72462e-16	3.12582	0.00220136	0.235693	-1.49724
GADD45B	0.321796	6.44646e-17	3.12298	0.00222121	0.236889	-1.50475
FLNA	0.533001	2.29207e-16	3.11815	0.00225525	0.239068	-1.51747
DCN	0.976159	-1.53999e-16	3.1176	0.00225916	0.239068	-1.51892
SUSD6	0.444119	-4.36926e-16	3.11509	0.00227704	0.239921	-1.52551
CSPG4P10	0.302054	1.0386e-16	3.11094	0.00230691	0.240259	-1.53641
EMP1	0.716034	-1.28929e-16	3.10824	0.0023266	0.240259	-1.54352
TSHZ2	0.584436	-1.71906e-16	3.10741	0.00233268	0.240259	-1.5457
SFRP1	0.527586	6.44646e-17	3.10725	0.00233384	0.240259	-1.54612
RUNX1-IT1	0.650191	5.73018e-17	3.1063	0.00234081	0.240259	-1.54861
ARSG	0.524862	-3.58136e-17	3.09638	0.00241477	0.242642	-1.57461
MSR1	0.464549	1.18185e-16	3.09494	0.00242563	0.242642	-1.57836
FGF7P2	0.394406	1.36092e-16	3.09444	0.00242942	0.242642	-1.57967
SSPN	0.83531	3.83206e-16	3.09431	0.00243041	0.242642	-1.58001
RSPO3	0.667923	-2.6144e-16	3.09188	0.002449	0.242642	-1.58637
SLC12A8	0.596528	2.04138e-16	3.08874	0.00247315	0.242642	-1.59457
FNBP1	0.446231	-4.01113e-16	3.08535	0.0024995	0.243719	-1.60343
FOXCUT	0.25969	-4.08276e-16	3.08325	0.00251595	0.244008	-1.60891
ADAM12	0.722671	-2.86509e-17	3.08266	0.00252058	0.244008	-1.61044
CLU	0.675879	9.66968e-17	3.08156	0.00252928	0.244008	-1.61332
MEG8	0.46888	4.01113e-16	3.07702	0.00256529	0.246611	-1.62513
ZNF423	0.352046	-1.02069e-16	3.07527	0.00257939	0.247096	-1.6297
KCND2	0.373438	-4.11857e-17	3.07152	0.00260968	0.247872	-1.63945
TP53INP2	0.293986	-1.79068e-16	3.07141	0.00261056	0.247872	-1.63973
TUBB4BP4	0.266035	-1.07441e-17	3.07085	0.00261512	0.247872	-1.64119
ZNF25	0.445748	-7.879e-17	3.05396	0.00275603	0.253327	-1.68499
CIRBP	0.482868	-3.72462e-16	3.05323	0.00276222	0.253327	-1.68686
DYDC1	0.305132	8.23714e-17	3.05236	0.00276967	0.253327	-1.6891
ACKR3	0.477644	-6.44646e-17	3.05228	0.00277035	0.253327	-1.68931
SNORD114-14	0.882211	-2.86509e-17	3.05161	0.00277612	0.253327	-1.69105
CC2D2A	0.390142	-1.00278e-16	3.05074	0.00278361	0.253327	-1.69329
SNORD113-3	0.500167	3.9395e-16	3.0411	0.0028679	0.259188	-1.71817
CEP295NL	0.654385	2.93672e-16	3.04014	0.00287649	0.259188	-1.72066
TBX2-AS1	0.271904	2.29207e-16	3.03885	0.00288797	0.259366	-1.72398
IGLV1-40	0.529454	-1.43255e-17	3.02354	0.00302754	0.267604	-1.76332
TMEM130	0.31513	2.50696e-17	3.01924	0.00306793	0.268612	-1.77436
DNM1	0.457766	1.43255e-16	3.00687	0.00318672	0.277082	-1.80599
NBL1	0.430545	2.43533e-16	3.00339	0.00322085	0.279161	-1.81486
CALD1	0.619242	-4.01113e-16	2.99656	0.00328888	0.282368	-1.83226
NUAK1	0.451825	-2.72184e-16	2.99235	0.0033315	0.284269	-1.84297
RAB31	0.859757	3.00835e-16	2.9882	0.00337398	0.285591	-1.85351
TMEM45A	0.439421	1.95184e-16	2.97893	0.00347074	0.290669	-1.87702
NID2	0.4805	1.0386e-16	2.97785	0.00348217	0.290735	-1.87975
RFTN1	0.533046	-3.65299e-16	2.97531	0.00350918	0.292097	-1.88618
FAT4	0.406217	-3.58136e-17	2.96821	0.00358583	0.296667	-1.90414
ZNF705A	0.411413	2.14882e-17	2.96661	0.00360327	0.296716	-1.90817
DSG4	0.287012	1.86231e-16	2.96584	0.00361165	0.296716	-1.9101
ECM2	0.324278	-3.00835e-16	2.96517	0.00361901	0.296716	-1.91179
NR3C1	0.596282	-1.00278e-16	2.96372	0.00363504	0.297137	-1.91546
IGHV1OR15-3	0.309402	-3.1516e-16	2.96031	0.00367277	0.298165	-1.92404
MICU3	0.268528	-6.08832e-17	2.95963	0.00368037	0.298165	-1.92576
PRAMEF14	0.275437	-7.16273e-17	2.95496	0.00373286	0.300624	-1.93752
SVEP1	0.378639	3.1516e-16	2.95161	0.00377086	0.300624	-1.94593
IGKV3-20	0.935407	-1.28929e-16	2.9508	0.00378018	0.300624	-1.94798
SLC16A2	0.301021	2.29207e-16	2.94997	0.00378967	0.300624	-1.95006
PLEKHH2	0.671282	2.13091e-16	2.94981	0.00379143	0.300624	-1.95045
PXDC1	0.550146	-3.11579e-16	2.94693	0.00382469	0.300624	-1.9577
PTPRM	0.770118	1.28929e-16	2.94662	0.00382818	0.300624	-1.95846
CMAHP	0.335117	-1.25348e-16	2.94551	0.00384114	0.300624	-1.96126
ANOS1	0.533865	-3.43811e-16	2.94451	0.00385267	0.300624	-1.96375
VEGFB	0.368026	3.29486e-16	2.9444	0.00385398	0.300624	-1.96403
TNRC18P1	0.269568	3.50974e-16	2.94279	0.00387278	0.300624	-1.96807
TFEC	0.602035	-3.36648e-16	2.9414	0.003889	0.300624	-1.97154
IGHG4	0.93144	1.43255e-16	2.9396	0.00391026	0.300624	-1.97606
SERPINE1	0.706158	-3.50974e-16	2.93906	0.00391658	0.300624	-1.9774
RGS4	0.530566	7.879e-17	2.93699	0.00394111	0.300676	-1.98259
BLID	0.457922	7.16273e-17	2.93686	0.00394264	0.300676	-1.98291
TUB	0.305032	-2.54277e-16	2.93275	0.00399186	0.302738	-1.9932
PRMT2	0.327609	-3.86787e-16	2.931	0.00401289	0.30349	-1.99756
AZIN2	0.372262	-1.5758e-16	2.92764	0.00405372	0.305731	-2.00596
MSC	0.334027	3.58136e-18	2.91901	0.00416019	0.311887	-2.02746
EGR2	0.35338	1.75487e-16	2.91826	0.00416961	0.311887	-2.02933
EPS8L1	0.284856	-1.71906e-16	2.91634	0.00419368	0.31283	-2.0341
ZNF32-AS2	0.279679	1.00278e-16	2.91155	0.00425434	0.314254	-2.04601
ELL	0.269301	4.15438e-16	2.9076	0.00430498	0.314254	-2.05581
PSMC1P4	0.251616	-1.0386e-16	2.90737	0.00430789	0.314254	-2.05637
CMTM3	0.440392	2.47114e-16	2.90682	0.00431506	0.314254	-2.05775
FBXO32	0.714847	1.00278e-16	2.90552	0.00433186	0.314254	-2.06097
PDIA2	0.259526	-4.36926e-16	2.90292	0.00436564	0.314254	-2.0674
ROR2	0.494529	-1.00278e-16	2.90231	0.00437356	0.314254	-2.06891
NPHP4	0.267119	3.25904e-16	2.90131	0.00438676	0.314254	-2.0714
CDH2	0.360302	1.23557e-16	2.89839	0.00442512	0.314254	-2.07861
CLMP	0.382044	3.79625e-16	2.89713	0.00444186	0.314254	-2.08174
SPARCL1	0.877218	-3.00835e-16	2.8965	0.00445016	0.314254	-2.08329
SH3PXD2B	0.341707	-3.43811e-16	2.88153	0.00465324	0.325489	-2.12023
PDGFRA	0.736661	-1.43255e-17	2.88064	0.00466549	0.325489	-2.1224
SMIM10	0.359478	-2.18463e-16	2.8787	0.00469255	0.325995	-2.12719
SLFN11	0.32092	1.50417e-16	2.87595	0.00473103	0.326594	-2.13394
SNORD114-12	0.478475	-2.14882e-16	2.875	0.00474432	0.326594	-2.13626
LBH	0.455552	8.59528e-17	2.86826	0.00484011	0.326594	-2.1528
IGKV2-28	0.624707	-2.43533e-16	2.86812	0.00484216	0.326594	-2.15315
SKI	0.351857	2.18463e-16	2.86729	0.00485412	0.326594	-2.15519
TVP23CP1	0.335105	-1.8265e-16	2.86603	0.00487228	0.326594	-2.15827
CUEDC1	0.221103	3.86787e-16	2.86128	0.00494126	0.328561	-2.1699
FAM168A	0.390253	2.22045e-16	2.86013	0.00495814	0.328561	-2.17272
PSMD6-AS2	0.342705	-1.43255e-16	2.85492	0.00503511	0.332854	-2.18545
GLIPR2	0.354187	-1.64743e-16	2.85006	0.00510782	0.335379	-2.19729
IL6STP1	0.289318	-1.8265e-16	2.84882	0.00512658	0.335379	-2.20032
FZD4	0.330173	-3.76043e-16	2.84828	0.00513473	0.335379	-2.20164
WWTR1	0.39627	2.14882e-17	2.84438	0.00519405	0.3354	-2.21112
FAM20C	0.377621	-6.08832e-17	2.84279	0.00521853	0.336029	-2.21501
COMP	0.273669	3.36648e-16	2.83896	0.00527772	0.338428	-2.22432
SLITRK4	0.403397	7.16273e-18	2.83757	0.00529929	0.338428	-2.22769
SRPX2	0.612584	4.04694e-16	2.83654	0.00531537	0.338428	-2.23019
C1S	0.736443	-1.07441e-16	2.8357	0.00532851	0.338428	-2.23223
ZNF521	0.313529	-1.79068e-16	2.83465	0.00534504	0.338428	-2.23478
TIMP3	0.525325	4.08276e-16	2.8318	0.0053899	0.339067	-2.24168
IGHV4-28	0.446294	1.93394e-16	2.82972	0.00542299	0.34004	-2.24673
DPYD	0.747105	2.82928e-16	2.82887	0.00543643	0.34004	-2.24878
JAM2	0.68273	-3.76043e-16	2.82848	0.00544273	0.34004	-2.24973
KDR	0.340531	3.58136e-17	2.82484	0.00550122	0.342909	-2.25855
DSE	0.480022	3.29486e-16	2.82264	0.0055368	0.343559	-2.26387
TRPV4	0.32491	-5.73018e-17	2.81738	0.00562273	0.345664	-2.27657
RAB32	0.323461	1.3251e-16	2.81669	0.00563403	0.345664	-2.27823
PLS3	0.552222	2.86509e-17	2.80769	0.00578421	0.351716	-2.29992
ARHGAP1	0.447957	2.50696e-17	2.79642	0.00597732	0.358666	-2.32698
ZNF542P	0.288945	-9.31155e-17	2.79162	0.00606135	0.360279	-2.33848
CHRDL1	0.564171	-1.00278e-16	2.79038	0.00608338	0.360279	-2.34147
RASSF8-AS1	0.304071	-3.22323e-17	2.78668	0.006149	0.362676	-2.3503
MYL9	0.719052	3.9395e-16	2.78352	0.00620564	0.362676	-2.35785
MEIS2	0.686538	3.58136e-18	2.782	0.00623305	0.362676	-2.36148
LHX5-AS1	0.249719	-2.6144e-16	2.78192	0.00623458	0.362676	-2.36168
IFNA12P	0.304554	2.00556e-16	2.7811	0.00624946	0.362676	-2.36364
SPDYE1	0.268203	-9.66968e-17	2.78088	0.00625346	0.362676	-2.36417
TRAJ45	0.478239	1.46836e-16	2.78056	0.00625916	0.362676	-2.36492
IGKV3-15	0.45683	4.29764e-16	2.77982	0.00627265	0.362676	-2.36669
HOXC9	0.658786	-1.25348e-16	2.77907	0.00628623	0.362676	-2.36847
COL3A1	0.764191	6.15995e-16	2.77851	0.00629655	0.362676	-2.36982
FN1	0.862338	-2.43533e-16	2.77716	0.00632123	0.363331	-2.37304
ZNF415P1	0.27973	4.29764e-17	2.77575	0.00634697	0.364044	-2.37638
NLGN2	0.291456	-2.86509e-17	2.77497	0.00636131	0.36409	-2.37824
RPL4P6	0.261346	-2.75765e-16	2.77426	0.00637444	0.36409	-2.37994
NEK7	0.378521	2.50696e-17	2.7689	0.00647415	0.367504	-2.39271
MILR1	0.372573	-8.59528e-17	2.76558	0.00653647	0.369728	-2.40058
ARHGEF6	0.346157	-4.29764e-16	2.76535	0.00654085	0.369728	-2.40114
ANGPTL2	0.51411	-2.82928e-16	2.76296	0.00658606	0.370748	-2.4068
PREX1	0.657893	-2.29207e-16	2.76036	0.00663575	0.371727	-2.41298
HMX3	0.257571	7.879e-17	2.75991	0.0066443	0.371727	-2.41404
PLOD2	0.370492	-7.16273e-17	2.75626	0.00671452	0.37336	-2.42268
IGHV2OR16-5	0.29386	3.58136e-17	2.75483	0.0067423	0.373384	-2.42607
IGFBP7	0.500811	-1.43255e-16	2.75186	0.00680009	0.375379	-2.43309
HAND2	0.285278	-3.11579e-16	2.75087	0.00681957	0.375379	-2.43544
VIM	0.467426	-3.4023e-16	2.75013	0.00683407	0.37542	-2.43718
ZKSCAN7	0.368603	9.31155e-17	2.74536	0.00692834	0.378154	-2.44844
COL6A1	0.676021	2.07719e-16	2.7449	0.00693766	0.378154	-2.44954
COL12A1	0.648751	-3.22323e-16	2.74164	0.00700289	0.378154	-2.45723
IGLV1-50	0.385913	1.86231e-16	2.74067	0.00702235	0.378154	-2.45951
OR4D10	0.207009	1.43255e-17	2.73703	0.00709601	0.379873	-2.46808
SGIP1	0.635836	4.11857e-16	2.73567	0.00712369	0.380211	-2.47127
HSFY6P	0.276032	2.68602e-17	2.73535	0.00713018	0.380211	-2.47202
SLIT2	0.375494	1.79068e-16	2.73236	0.00719152	0.381249	-2.47905
CHST11	0.483356	8.59528e-17	2.72886	0.00726404	0.382227	-2.48728
TMC8	0.232326	1.21766e-16	2.72877	0.00726585	0.382227	-2.48749
RPS12P5	0.271825	-8.59528e-17	2.72831	0.00727541	0.382227	-2.48857
IGKV2-40	0.357481	1.11022e-16	2.72814	0.007279	0.382227	-2.48897
MEF2D	0.297344	-1.50417e-16	2.72772	0.00728767	0.382227	-2.48995
SHISA4	0.3633	-3.58136e-17	2.72656	0.00731196	0.382227	-2.49268
IGHV4-55	0.406127	4.29764e-16	2.72151	0.0074181	0.385036	-2.5045
KANK2	0.32027	6.80459e-17	2.71973	0.00745584	0.385529	-2.50867
CSPG4P13	0.205445	-2.93672e-16	2.71848	0.00748257	0.38618	-2.5116
DUSP1	0.562597	-2.18463e-16	2.71724	0.00750895	0.386522	-2.51449
SLC9A9	0.297131	-1.61161e-16	2.71447	0.00756851	0.387684	-2.52097
SLFN12	0.301148	-3.4023e-16	2.70668	0.00773821	0.391798	-2.53914
EIF5A2	0.360757	-3.22323e-16	2.70329	0.00781312	0.391798	-2.54704
GLIS3	0.557309	-1.07441e-16	2.70033	0.00787907	0.392522	-2.55392
TMEM47	0.421378	1.43255e-17	2.69897	0.0079095	0.392522	-2.55708
INPP5F	0.315883	5.19298e-17	2.69889	0.00791138	0.392522	-2.55728
IGKV2D-28	0.494466	1.43255e-17	2.69853	0.0079195	0.392522	-2.55812
TMEM200A	0.545486	7.879e-17	2.69756	0.00794129	0.392522	-2.56037
RHOJ	0.523734	2.11301e-16	2.69432	0.0080146	0.39337	-2.56789
GPR183	0.679595	-1.25348e-16	2.69385	0.00802531	0.39337	-2.56899
NREP	0.455956	2.57858e-16	2.69265	0.00805248	0.393441	-2.57176
RGS11	0.273185	-2.82928e-16	2.69252	0.00805558	0.393441	-2.57207
DCBLD2	0.852473	2.29207e-16	2.69134	0.00808251	0.394051	-2.5748
RUNX2	0.369944	-1.28929e-16	2.68831	0.00815204	0.396076	-2.58182
FLNC	0.364954	-3.33067e-16	2.68827	0.00815305	0.396076	-2.58192
UBE2Q2P1	0.307146	8.95341e-17	2.68718	0.00817817	0.396447	-2.58444
IRAK3	0.470436	5.01391e-17	2.68668	0.00818974	0.396447	-2.58559
GALNS	0.376683	1.21766e-16	2.68414	0.0082488	0.398512	-2.59147
SLCO2B1	0.460877	-1.95184e-16	2.68285	0.00827896	0.398512	-2.59446
F2R	0.28103	-3.58136e-16	2.67725	0.00841102	0.401836	-2.60741
CCDC102B	0.405514	-1.37883e-16	2.67692	0.0084188	0.401836	-2.60817
LRRC8E	0.29898	3.58136e-17	2.67086	0.00856379	0.405863	-2.62213
CD200	0.716265	-3.43811e-16	2.67052	0.00857203	0.405863	-2.62292
MS4A4E	0.37738	-4.65577e-17	2.66937	0.00859989	0.406218	-2.62557
IGKV1D-37	0.347724	4.22601e-16	2.66736	0.00864858	0.407109	-2.63019
ANTXR1	0.890036	-5.73018e-17	2.66102	0.00880414	0.411164	-2.64476
ALDH1L1-AS2	0.278142	-2.11301e-16	2.66044	0.00881845	0.411164	-2.64609
IGKV1D-42	0.382523	-1.36092e-16	2.65972	0.00883633	0.411164	-2.64774
ADGRF5	0.473314	-1.43255e-17	2.65386	0.00898288	0.412164	-2.66118
PDGFRL	0.318094	-1.96975e-16	2.65213	0.00902648	0.412164	-2.66514
SCN4A	0.277994	1.50417e-16	2.65017	0.00907603	0.413679	-2.66961
IGKV1OR-3	0.354544	-2.14882e-16	2.64831	0.00912348	0.414795	-2.67387
LRP1	0.492478	3.04416e-16	2.64795	0.00913273	0.414795	-2.6747
RBMS3-AS1	0.235674	-3.4023e-17	2.64743	0.0091461	0.414795	-2.67589
DYTN	0.24589	1.3251e-16	2.64555	0.00919439	0.415605	-2.68019
PARD6G	0.260054	-1.61161e-16	2.64087	0.00931546	0.42029	-2.69087
MAP7D3	0.477144	-1.07441e-17	2.63746	0.00940438	0.42029	-2.69862
RPS20P22	0.269391	2.79346e-16	2.63712	0.00941327	0.42029	-2.69939
MMP9	0.422188	-3.58136e-17	2.63576	0.00944929	0.42029	-2.70251
C4A	0.271221	1.28929e-16	2.63507	0.00946738	0.42029	-2.70407
C4B	0.271221	1.28929e-16	2.63507	0.00946738	0.42029	-2.70407
ADAMTS1	0.60429	1.28929e-16	2.62804	0.00965467	0.423964	-2.72005
SIGLEC9	0.209009	-1.00278e-16	2.62789	0.00965884	0.423964	-2.7204
ZC2HC1A	0.530909	1.18185e-16	2.62439	0.00975327	0.426737	-2.72834
WDR72	0.293276	-3.47392e-16	2.62311	0.00978813	0.426942	-2.73125
AGAP2	0.33099	-2.6144e-16	2.62188	0.00982159	0.427176	-2.73403
RIMKLB	0.425878	4.29764e-17	2.62172	0.00982589	0.427176	-2.73438
IGKV2D-38	0.257979	4.29764e-17	2.61994	0.00987475	0.42724	-2.73843
GLT8D2	0.578509	-2.47114e-16	2.61802	0.00992727	0.42724	-2.74275
IL10RA	0.460061	-9.31155e-17	2.61791	0.00993041	0.42724	-2.74301
S1PR2	0.346334	-1.93394e-16	2.61542	0.00999937	0.428525	-2.74865
ITGB5	0.346869	1.50417e-16	2.61489	0.0100139	0.428525	-2.74983
EFEMP2	0.356714	-1.68324e-16	2.61344	0.0100545	0.428839	-2.75313
SNORA54	0.545966	1.50417e-16	2.61184	0.010099	0.429473	-2.75672
PEG3-AS1	0.270633	5.37205e-18	2.60621	0.0102578	0.434728	-2.76944
WBP1L	0.414784	5.01391e-17	2.60571	0.010272	0.434728	-2.77056
SP140	0.287851	2.82928e-16	2.6007	0.0104153	0.434728	-2.78184
FLJ42393	0.325887	-2.86509e-17	2.59926	0.0104569	0.435068	-2.78508
CYBRD1	0.657034	-5.73018e-17	2.59882	0.0104696	0.435068	-2.78607
PIP5K1C	0.329566	-2.29207e-16	2.59806	0.0104916	0.435322	-2.78779
HTR2B	0.332647	1.07441e-16	2.59492	0.0105827	0.437109	-2.79482
GNG11	0.434046	1.07441e-17	2.5924	0.0106567	0.438657	-2.80049
IGKV3D-20	0.490358	-3.43811e-16	2.592	0.0106684	0.438657	-2.80138
LCE3D	0.297702	-3.83206e-16	2.58937	0.010746	0.440133	-2.80728
RBPMS2	0.408795	-7.16273e-17	2.58925	0.0107496	0.440133	-2.80755
IGHV1OR16-4	0.246839	-3.47392e-16	2.58484	0.0108807	0.443729	-2.81741
IGKV2-38	0.258344	3.9395e-17	2.58402	0.0109055	0.443729	-2.81926
WDFY1	0.342561	-3.90369e-16	2.58011	0.0110232	0.446522	-2.82799
COL6A2	0.409923	-1.43255e-16	2.57912	0.0110533	0.446924	-2.8302
NEXN	0.613561	3.25904e-16	2.57719	0.0111119	0.447057	-2.83451
CNTLN	0.344751	2.50696e-16	2.57695	0.0111194	0.447057	-2.83505
IGLJCOR18	0.299503	9.66968e-17	2.57645	0.0111347	0.447057	-2.83617
OR1D5	0.240439	-1.27138e-16	2.57435	0.011199	0.448247	-2.84085
COL11A1	0.548031	3.79625e-16	2.57311	0.0112371	0.448247	-2.84361
PPP1R14A	0.319954	3.65299e-16	2.57134	0.0112917	0.448247	-2.84755
ARHGEF25	0.272852	-1.79068e-18	2.57072	0.011311	0.448247	-2.84894
ANKRD44	0.399509	3.36648e-16	2.56992	0.0113356	0.448247	-2.8507
OR2T7	0.269598	1.39673e-16	2.56968	0.0113432	0.448247	-2.85125
ITGA11	0.289989	-1.14604e-16	2.56962	0.0113449	0.448247	-2.85137
ANKRD6	0.367748	-2.93672e-16	2.55799	0.0117118	0.455941	-2.87722
MAB21L2	0.637368	-4.1902e-16	2.55763	0.0117233	0.455941	-2.87802
MN1	0.263869	-4.29764e-16	2.55636	0.011764	0.456872	-2.88083
PHTF2	0.380273	3.58136e-17	2.55349	0.0118566	0.45916	-2.88719
PDLIM7	0.23012	1.43255e-17	2.55186	0.0119093	0.459804	-2.89079
SUCNR1	0.256881	-2.05928e-16	2.55041	0.0119563	0.459804	-2.89398
RASGRP1	0.371389	1.3251e-16	2.54602	0.0121002	0.460491	-2.90369
FLNB	0.254817	4.22601e-16	2.54531	0.0121237	0.460491	-2.90526
ATXN3	0.292894	-3.9395e-16	2.54408	0.0121642	0.460491	-2.90797
ELFN2	0.245988	-2.14882e-17	2.54386	0.0121716	0.460491	-2.90846
SCUBE3	0.401998	1.61161e-16	2.54218	0.0122272	0.460491	-2.91216
TRIB2	0.346773	1.14604e-16	2.54189	0.0122368	0.460491	-2.91279
SNORD113-5	0.374618	2.20254e-16	2.53152	0.0125862	0.469353	-2.93561
BORCS6	0.273415	5.37205e-17	2.53108	0.0126011	0.469353	-2.93657
UGCG	0.344427	2.22045e-16	2.52914	0.0126676	0.471187	-2.94083
RNF180	0.359157	-1.3251e-16	2.52401	0.0128447	0.474813	-2.95208
CLIC4	0.35447	-2.07719e-16	2.52392	0.0128479	0.474813	-2.95228
KCTD20	0.335724	-1.07441e-16	2.52379	0.0128522	0.474813	-2.95255
HYI	0.281973	8.23714e-17	2.5181	0.0130516	0.476872	-2.96502
VCAM1	0.291221	1.93394e-16	2.51601	0.0131255	0.476872	-2.96959
EMCN	0.561929	-4.15438e-16	2.51577	0.013134	0.476872	-2.97011
IGKV4-1	0.474786	-1.96975e-16	2.5125	0.0132501	0.476872	-2.97723
NAP1L3	0.249159	2.00556e-16	2.51094	0.0133062	0.476872	-2.98065
GOLGA8N	0.519245	-8.95341e-17	2.50991	0.0133432	0.476872	-2.98289
RPS16P5	0.344798	-4.36926e-16	2.50919	0.0133691	0.476872	-2.98446
CADM1	0.255171	-1.43255e-16	2.50845	0.0133956	0.476872	-2.98607
LXN	0.558174	2.02347e-16	2.50842	0.0133966	0.476872	-2.98613
HIGD1AP8	0.215658	-9.84875e-17	2.50791	0.0134151	0.476872	-2.98724
FOSB	0.439446	3.97531e-16	2.50762	0.0134256	0.476872	-2.98788
C4orf17	0.274543	8.41621e-17	2.50561	0.0134983	0.476872	-2.99224
RFTN2	0.498974	-5.55112e-17	2.50548	0.0135031	0.476872	-2.99253
CFH	0.272924	2.07719e-16	2.50504	0.0135191	0.476872	-2.99349
FMO2	0.285792	3.9395e-17	2.50315	0.013588	0.478684	-2.9976
CCL2	0.426778	1.0386e-16	2.5004	0.0136889	0.480342	-3.00358
SLED1	0.304391	-7.16273e-18	2.49757	0.0137933	0.480342	-3.00973
IDS	0.44084	-2.22045e-16	2.49756	0.0137934	0.480342	-3.00973
USP9YP30	0.238552	-3.58136e-18	2.49451	0.0139071	0.481931	-3.01636
LYVE1	0.377175	2.3637e-16	2.49396	0.0139273	0.481931	-3.01754
FAM180A	0.294562	-1.64743e-16	2.49156	0.0140172	0.48287	-3.02274
VN2R9P	0.237184	8.95341e-17	2.49029	0.014065	0.483021	-3.02548
IL20RB	0.303647	-2.14882e-16	2.48454	0.0142832	0.484553	-3.03792
ALOX5AP	0.464012	-2.57858e-16	2.48444	0.0142871	0.484553	-3.03814
COLEC12	0.669486	-1.64743e-16	2.47985	0.0144634	0.486903	-3.04804
THSD4	0.470273	8.95341e-18	2.47828	0.0145243	0.487131	-3.05143
IL1RL1	0.302979	2.14882e-16	2.47802	0.0145341	0.487131	-3.05198
SIGLEC1	0.182756	8.59528e-17	2.4759	0.0146166	0.488406	-3.05655
CDK14	0.477848	-4.29764e-17	2.47478	0.0146605	0.488406	-3.05896
ITGA5	0.702244	4.11857e-16	2.47398	0.0146916	0.488406	-3.06067
ADPRH	0.315806	-1.79068e-17	2.47238	0.0147545	0.488406	-3.06412
ASPN	0.767835	-3.65299e-16	2.47199	0.0147697	0.488406	-3.06495
BOLA3-AS1	0.297905	2.50696e-17	2.4712	0.014801	0.488406	-3.06666
PALLD	0.533155	5.01391e-17	2.46917	0.0148814	0.488919	-3.07103
RPL9P16	0.353746	3.4023e-17	2.46789	0.014932	0.489705	-3.07377
YPEL3	0.387861	2.93672e-16	2.46634	0.0149939	0.490429	-3.0771
UBTFL10	0.257368	-1.3251e-16	2.46533	0.0150339	0.490469	-3.07925
SNORD114-4	0.248585	1.27138e-16	2.46415	0.0150815	0.490469	-3.0818
TSPAN9	0.350085	-9.31155e-17	2.4633	0.0151153	0.490469	-3.08361
RBMS1P1	0.361855	7.16273e-17	2.46067	0.0152213	0.490469	-3.08924
DPT	0.553436	1.68324e-16	2.46032	0.0152355	0.490469	-3.08999
TCEAL7	0.208721	4.15438e-16	2.45984	0.015255	0.490469	-3.09102
ZNF559-ZNF177	0.290177	-1.75487e-16	2.45969	0.015261	0.490469	-3.09134
LAMB2P1	0.268341	-4.15438e-16	2.45822	0.0153209	0.490759	-3.09449
IRGM	0.228513	1.71906e-16	2.45748	0.0153508	0.490759	-3.09607
SEMA3D	0.230179	-2.86509e-17	2.45374	0.0155041	0.494187	-3.10407
IGKV3D-7	0.428924	4.29764e-16	2.45275	0.0155447	0.49464	-3.10618
RAC1P9	0.216195	1.28929e-16	2.45095	0.0156191	0.495934	-3.11003
SYNPO2	0.528159	-3.58136e-18	2.44988	0.0156632	0.496676	-3.1123
ANO2	0.288955	1.96975e-16	2.44908	0.0156967	0.497159	-3.11402
SALL4	0.241364	3.72462e-16	2.44682	0.0157905	0.497208	-3.11882
TRIO	0.267446	-1.50417e-16	2.44646	0.0158058	0.497208	-3.1196
GREM1	0.594026	7.16273e-17	2.44642	0.0158075	0.497208	-3.11968
IFI16	0.643701	3.58136e-17	2.44499	0.0158673	0.498516	-3.12272
PPP4R1-AS1	0.184245	-2.50696e-16	2.44432	0.0158956	0.498699	-3.12416
VTRNA1-3	0.497399	-3.29486e-16	2.44398	0.0159097	0.498699	-3.12487
KLF11	0.283494	1.93394e-16	2.44128	0.0160235	0.500543	-3.13061
WDR44	0.334754	2.07719e-16	2.43891	0.0161243	0.503114	-3.13565
NALCN-AS1	0.236414	-4.65577e-17	2.43841	0.0161456	0.503205	-3.13672
FGF7P1	0.298321	4.33345e-16	2.43734	0.0161909	0.503468	-3.13897
GPATCH2L	0.363917	1.43255e-17	2.43673	0.0162171	0.503707	-3.14027
DLC1	0.315151	2.54277e-16	2.43482	0.0162992	0.50505	-3.14433
VN1R74P	0.268681	-1.50417e-16	2.43289	0.0163821	0.505287	-3.14841
PNMA6B	0.245091	4.65577e-17	2.43255	0.0163968	0.505287	-3.14913
TBC1D9	0.387141	-2.14882e-17	2.4325	0.016399	0.505287	-3.14924
GLIPR1	0.452512	2.50696e-16	2.43095	0.016466	0.506254	-3.15252
EBF4	0.261152	3.83206e-16	2.42849	0.0165729	0.507827	-3.15773
SNX29	0.248285	-3.1516e-16	2.42567	0.0166964	0.509324	-3.16369
KIF26B	0.451221	1.64743e-16	2.42283	0.0168214	0.510087	-3.16969
IFNG-AS1	0.277015	1.46836e-16	2.42246	0.0168381	0.510087	-3.17049
OPTN	0.295135	7.16273e-17	2.42073	0.0169144	0.510087	-3.17412
KRT8P6	0.227772	3.58136e-17	2.42048	0.0169256	0.510087	-3.17465
RSPH10B2	0.231421	-2.00556e-16	2.42008	0.0169433	0.510087	-3.17549
EGR3	0.408722	-1.39673e-16	2.41977	0.0169571	0.510087	-3.17615
EVL	0.472931	-1.21766e-16	2.41915	0.0169848	0.510087	-3.17746
KLF3-AS1	0.381219	1.91603e-16	2.41818	0.0170282	0.510087	-3.17951
ADAM22	0.579807	1.43255e-17	2.41551	0.0171477	0.5111	-3.18513
LAPTM5	0.440411	-3.65299e-16	2.41253	0.0172821	0.513303	-3.1914
NUMBL	0.208304	-2.50696e-16	2.41198	0.0173072	0.513303	-3.19256
NLGN4X	0.293865	-2.86509e-17	2.40983	0.0174049	0.514406	-3.19708
TDO2	0.384031	2.50696e-17	2.40973	0.0174094	0.514406	-3.19729
AHNAK2	0.533538	2.75765e-16	2.40443	0.0176525	0.517627	-3.20842
LDB2	0.343821	-1.75487e-16	2.40406	0.0176695	0.517627	-3.20919
SWAP70	0.33216	-4.65577e-17	2.40317	0.0177103	0.517627	-3.21104
TP53BP2	0.250739	-2.50696e-16	2.40296	0.0177203	0.517627	-3.21149
DCLK2	0.414666	7.879e-17	2.40138	0.0177934	0.518956	-3.2148
SLC16A4	0.415805	2.93672e-16	2.40035	0.0178415	0.518956	-3.21696
MMP14	0.339101	3.58136e-18	2.39944	0.0178836	0.518956	-3.21886
MORC2	0.224447	1.89812e-16	2.39914	0.0178977	0.518956	-3.21949
SIN3B	0.278313	-2.50696e-17	2.39893	0.0179074	0.518956	-3.21992
NID1	0.340907	-2.79346e-16	2.39885	0.0179112	0.518956	-3.22009
RUNX1	0.620918	3.22323e-16	2.39663	0.0180151	0.520737	-3.22473
AQP1	0.401036	3.58136e-16	2.39492	0.0180955	0.520737	-3.2283
ZNF90P3	0.201892	3.22323e-17	2.39419	0.0181304	0.521047	-3.22984
ARHGAP31	0.446094	-3.22323e-17	2.39231	0.0182194	0.522127	-3.23377
IGFBP3	0.601766	-4.29764e-16	2.39196	0.018236	0.522127	-3.2345
ARHGEF26	0.249381	-2.14882e-17	2.39077	0.0182923	0.522127	-3.23697
RPL7AP56	0.206033	1.61161e-16	2.3892	0.0183674	0.522299	-3.24026
EPB41L3	0.322817	-7.16273e-18	2.38713	0.0184665	0.523907	-3.24457
SPON1	0.31353	1.89812e-16	2.38514	0.018562	0.524439	-3.2487
SRGAP3	0.321916	1.37883e-16	2.38503	0.0185673	0.524439	-3.24893
QKI	0.418533	1.21766e-16	2.38314	0.0186586	0.524439	-3.25286
DPYSL3	0.330457	8.59528e-17	2.38289	0.0186709	0.524439	-3.25339
ZEB2-AS1	0.224505	1.36092e-16	2.37917	0.0188521	0.524439	-3.26113
MYCBPAP	0.301413	-1.14604e-16	2.37894	0.018863	0.524439	-3.26159
CPXM2	0.36472	1.64743e-16	2.3743	0.0190912	0.527051	-3.27122
EDARADD	0.306941	-1.75487e-16	2.37424	0.0190941	0.527051	-3.27134
OSMR-AS1	0.206274	-7.16273e-18	2.37359	0.0191263	0.527051	-3.27269
MSRB3	0.315529	9.31155e-17	2.37245	0.0191829	0.527051	-3.27505
RHOB	0.318879	-4.01113e-16	2.37176	0.0192175	0.527051	-3.27649
C22orf15	0.234434	3.58136e-18	2.36981	0.0193147	0.527051	-3.28053
EPHX1	0.447716	3.54555e-16	2.36941	0.0193344	0.527051	-3.28135
ZFHX4-AS1	0.252221	7.879e-17	2.36929	0.0193406	0.527051	-3.2816
OR8X1P	0.255753	-1.14604e-16	2.36902	0.0193539	0.527051	-3.28216
GORAB	0.358219	1.09232e-16	2.36849	0.0193806	0.527051	-3.28326
SCUBE2	0.298684	-1.59371e-16	2.36608	0.0195015	0.527051	-3.28824
MARK2P10	0.214443	-1.75487e-16	2.36601	0.0195052	0.527051	-3.28839
NKILA	0.27243	-2.14882e-17	2.36541	0.0195355	0.527051	-3.28963
KRBOX1	0.241125	-1.79068e-16	2.3651	0.0195512	0.527051	-3.29027
CDKL1	0.303349	1.61161e-16	2.36499	0.0195566	0.527051	-3.29049
SEC24D	0.496828	2.86509e-16	2.36468	0.0195719	0.527051	-3.29112
GSTA6P	0.210483	-1.79068e-17	2.3636	0.0196267	0.527928	-3.29335
C1QB	0.358962	-8.59528e-17	2.35837	0.0198933	0.531894	-3.30414
ZCCHC24	0.362672	-7.16273e-17	2.35784	0.0199203	0.531894	-3.30523
AMD1P1	0.22115	9.31155e-17	2.35701	0.0199632	0.531894	-3.30695
EIF4EP4	0.19232	1.07441e-16	2.35583	0.0200239	0.531894	-3.30937
PAPPA2	0.255144	-1.09232e-16	2.35534	0.0200491	0.531894	-3.31038
SCML4	0.276459	-2.50696e-17	2.35474	0.0200801	0.531894	-3.31161
RARG	0.3588	1.11022e-16	2.3546	0.0200872	0.531894	-3.31189
ARMCX3	0.299064	-3.1516e-16	2.35341	0.0201489	0.531894	-3.31435
EMP3	0.457237	4.15438e-16	2.35306	0.0201672	0.531894	-3.31507
SNORA11	0.396734	1.14604e-16	2.35002	0.0203254	0.532596	-3.32131
EIF4A2P2	0.232505	-2.11301e-16	2.34968	0.0203434	0.532596	-3.32202
MB21D2	0.327026	1.43255e-17	2.34962	0.0203464	0.532596	-3.32214
ANXA5	0.513301	1.27138e-16	2.3484	0.0204103	0.532715	-3.32464
SSXP9	0.215996	-9.66968e-17	2.3459	0.0205417	0.533782	-3.32977
PGM5-AS1	0.220458	-1.21766e-16	2.34488	0.0205954	0.533994	-3.33185
ADAMTS9	0.558068	2.68602e-17	2.34366	0.0206601	0.534903	-3.33436
AFF2-IT1	0.299545	-1.16394e-16	2.3431	0.0206899	0.534903	-3.33551
HSPG2	0.404762	1.71906e-16	2.34276	0.0207081	0.534903	-3.33621
CLIC2	0.48639	-1.75487e-16	2.3406	0.020823	0.537143	-3.34063
SNORD114-3	0.355203	-1.73696e-16	2.34038	0.0208349	0.537143	-3.34108
RCAN1	0.383293	7.16273e-17	2.33926	0.0208947	0.537751	-3.34337
PJA2	0.350537	3.9395e-17	2.33794	0.0209654	0.538097	-3.34607
IGKV1D-32	0.303858	3.79625e-16	2.3375	0.0209892	0.538097	-3.34697
MCHR2-AS1	0.20171	-1.89812e-16	2.33746	0.0209912	0.538097	-3.34705
UNC5C	0.295804	-1.88022e-16	2.33633	0.0210521	0.538097	-3.34936
NTM	0.276241	-1.55789e-16	2.33514	0.0211164	0.538383	-3.3518
BACE1	0.248114	-1.43255e-17	2.33508	0.0211196	0.538383	-3.35192
IGKV1D-33	0.413867	9.31155e-17	2.33265	0.0212514	0.539343	-3.35688
LAMP5	0.217149	-2.00556e-16	2.33256	0.0212561	0.539343	-3.35705
EGR1	0.463071	1.0386e-16	2.32726	0.0215456	0.542968	-3.36785
UBE2Q2P11	0.240291	-1.96975e-16	2.32706	0.0215568	0.542968	-3.36826
RGCC	0.556472	1.3251e-16	2.32666	0.0215789	0.542968	-3.36908
CRYBG3	0.359444	-1.21766e-16	2.32664	0.02158	0.542968	-3.36912
NTRK3	0.24856	-1.14604e-16	2.32433	0.0217077	0.544577	-3.37382
CCDC144NL-AS1	0.284374	-5.37205e-17	2.32224	0.0218238	0.546135	-3.37807
SPATA31B1P	0.227234	4.36926e-16	2.31927	0.0219894	0.54827	-3.3841
LZTS1	0.218181	3.58136e-17	2.31868	0.0220225	0.548594	-3.38529
AK5	0.277007	-1.37883e-16	2.31825	0.0220465	0.54869	-3.38616
KLF7	0.424305	2.79346e-16	2.31667	0.0221351	0.549894	-3.38936
PTPRS	0.199572	1.71906e-16	2.31444	0.0222611	0.551051	-3.39388
CRISPLD2	0.267756	3.58136e-17	2.31185	0.0224083	0.552658	-3.39913
ISLR	0.297191	-3.43811e-16	2.31125	0.0224425	0.552807	-3.40034
GOLGA6L5P	0.272792	7.16273e-17	2.31068	0.0224749	0.552807	-3.40149
IGHV3-30	0.32706	3.58136e-16	2.3099	0.0225197	0.552807	-3.40307
TIMP1	0.602	2.07719e-16	2.30943	0.0225466	0.552807	-3.40402
CYFIP1	0.222198	3.58136e-17	2.30856	0.0225966	0.552807	-3.40579
KLK10	0.391862	3.36648e-16	2.30816	0.0226191	0.552862	-3.40658
GAS1	0.242512	-2.14882e-17	2.30772	0.0226443	0.552984	-3.40747
BCAT1	0.357809	2.07719e-16	2.30697	0.0226875	0.553292	-3.40898
HECTD2-AS1	0.245554	5.73018e-17	2.30404	0.0228572	0.555696	-3.41491
GYG1P3	0.226796	-1.61161e-16	2.30195	0.0229783	0.557647	-3.41912
CFI	0.308975	2.86509e-16	2.29932	0.0231316	0.559382	-3.42441
CGB7	0.208684	1.79068e-16	2.29932	0.0231317	0.559382	-3.42441
COQ5	0.286244	2.86509e-17	2.29805	0.023206	0.560187	-3.42696
PIM1	0.28186	-1.25348e-16	2.29544	0.0233602	0.561205	-3.43223
CNN3	0.499141	-3.79625e-16	2.29492	0.0233906	0.561205	-3.43326
PYHIN1	0.2987	-2.22045e-16	2.29145	0.0235969	0.561792	-3.44024
IGKV3D-11	0.620364	1.14604e-16	2.29123	0.0236097	0.561792	-3.44067
MRPL22P1	0.228423	6.80459e-17	2.29074	0.0236389	0.561792	-3.44165
CASQ2	0.269696	2.07719e-16	2.28946	0.0237155	0.562148	-3.44423
PLXNC1	0.42294	4.65577e-17	2.2892	0.023731	0.562148	-3.44475
ACVR1	0.383291	-3.22323e-17	2.28794	0.0238068	0.563152	-3.44728
TP53INP1	0.328659	8.59528e-17	2.28765	0.0238239	0.563152	-3.44785
SRGAP2B	0.413293	-3.65299e-16	2.28654	0.023891	0.563761	-3.45008
NFATC1	0.315021	-4.65577e-17	2.2847	0.0240022	0.564362	-3.45377
PCBP3	0.399444	-1.55789e-16	2.28455	0.0240108	0.564362	-3.45406
VCL	0.371945	-3.11579e-16	2.2844	0.0240198	0.564362	-3.45436
TRBV4-1	0.279132	-1.18185e-16	2.27887	0.0243567	0.566634	-3.46542
B3GALT4	0.313485	2.86509e-17	2.27818	0.0243989	0.566634	-3.46679
ADCY4	0.326594	-4.1902e-16	2.2781	0.0244039	0.566634	-3.46695
IGKV1OR2-118	0.280022	5.01391e-17	2.27697	0.0244737	0.566634	-3.46922
NUPR1	0.214788	0	2.27593	0.0245373	0.566634	-3.47128
ANGPTL1	0.213118	1.23557e-16	2.27577	0.0245472	0.566634	-3.4716
NRK	0.194427	1.00278e-16	2.26875	0.0249841	0.571183	-3.4856
FGF7	0.388433	8.59528e-17	2.26858	0.0249942	0.571183	-3.48592
KRT8P25	0.208737	1.39673e-16	2.26848	0.0250005	0.571183	-3.48612
SULF2	0.536928	0	2.26565	0.0251789	0.573528	-3.49176
PHACTR2-AS1	0.249223	-1.96975e-16	2.26426	0.0252668	0.574861	-3.49452
LRCH2	0.216288	6.44646e-17	2.26331	0.0253266	0.575742	-3.49639
DAB2	0.481709	-8.59528e-17	2.26011	0.0255304	0.578448	-3.50274
BCAR3	0.246439	-1.50417e-16	2.25893	0.0256059	0.578544	-3.50509
FBXO27	0.246762	1.39673e-16	2.25863	0.0256248	0.578544	-3.50567
DYNC2H1	0.309154	2.20254e-16	2.25797	0.0256672	0.578544	-3.50698
IGKV1-39	0.576166	6.08832e-17	2.25599	0.0257946	0.579747	-3.5109
TSPY21P	0.205792	5.73018e-17	2.25533	0.0258369	0.579747	-3.5122
GMNC	0.248794	-1.0386e-16	2.25481	0.0258703	0.579747	-3.51323
ZEB2P1	0.189725	1.11022e-16	2.25472	0.0258765	0.579747	-3.51342
CYCSP27	0.231208	5.01391e-17	2.2543	0.0259035	0.579747	-3.51424
BTK	0.352907	-1.16394e-16	2.25068	0.0261388	0.583517	-3.5214
CDO1	0.245743	1.68324e-16	2.24951	0.0262151	0.583653	-3.52371
EVI2A	0.502914	3.25904e-16	2.24763	0.0263381	0.583653	-3.52742
LRRC32	0.354158	-2.43533e-16	2.24653	0.0264104	0.583653	-3.52959
GPR83	0.3895	8.41621e-17	2.246	0.0264454	0.583653	-3.53064
C3orf36	0.197342	2.97253e-16	2.24577	0.0264604	0.583653	-3.53108
COL8A1	0.273126	-1.5758e-16	2.24562	0.0264704	0.583653	-3.53138
RCAN2	0.400023	1.21766e-16	2.24261	0.0266689	0.586183	-3.53729
UNC5B	0.275576	3.9395e-16	2.24147	0.0267446	0.586962	-3.53954
NXF4	0.222149	3.58136e-17	2.24025	0.0268262	0.587319	-3.54194
KCTD9P3	0.223763	-1.79068e-16	2.24008	0.0268371	0.587319	-3.54227
ITGA8	0.25688	1.50417e-16	2.23977	0.0268583	0.587319	-3.54289
ZBTB40	0.256843	-2.57858e-16	2.23947	0.0268781	0.587319	-3.54348
PAK3	0.250645	1.64743e-16	2.23892	0.0269152	0.587319	-3.54457
DOCK10	0.28799	2.32789e-17	2.23837	0.0269517	0.587319	-3.54564
MYLK	0.516669	1.50417e-16	2.23808	0.0269714	0.587319	-3.54622
ZDBF2	0.445674	1.61161e-16	2.23574	0.0271282	0.587976	-3.5508
IGKV1-33	0.637501	2.11301e-16	2.23465	0.0272017	0.587976	-3.55294
TNC	0.33223	2.14882e-17	2.23428	0.027227	0.587976	-3.55367
SNORD114-19	0.301167	5.37205e-17	2.23392	0.0272509	0.587976	-3.55437
S100A11P1	0.238694	-5.01391e-17	2.23361	0.0272721	0.587976	-3.55498
GOLGA2P11	0.238294	-2.14882e-17	2.23219	0.0273683	0.588806	-3.55777
ELOVL5	0.456604	1.61161e-16	2.23188	0.0273893	0.588806	-3.55837
IGHV3-72	0.335615	1.3251e-16	2.22981	0.0275299	0.589044	-3.56242
PLGLA	0.244768	-4.04694e-16	2.22891	0.0275914	0.589056	-3.56418
SPATA31D3	0.171678	1.86231e-16	2.22888	0.0275933	0.589056	-3.56424
KLF7-IT1	0.228962	3.22323e-17	2.22499	0.0278606	0.590151	-3.57185
TRO	0.387903	1.96975e-16	2.22426	0.027911	0.590151	-3.57328
JAG1	0.291438	2.93672e-16	2.22337	0.0279722	0.590151	-3.57501
GPR137	0.216948	-6.44646e-17	2.22308	0.0279923	0.590151	-3.57558
LRRC4C	0.25267	1.55789e-16	2.223	0.027998	0.590151	-3.57574
A2M	0.516761	-3.00835e-16	2.22266	0.0280214	0.590151	-3.5764
CCDC88A	0.40958	-4.29764e-17	2.22052	0.02817	0.590151	-3.58057
IGHV1OR16-3	0.225565	-9.31155e-17	2.2189	0.0282826	0.590151	-3.58372
GOLGA8O	0.28554	1.61161e-16	2.21854	0.0283082	0.590151	-3.58444
CHSY1	0.331902	-7.879e-17	2.21816	0.0283349	0.590151	-3.58518
ATG9A	0.29299	2.25626e-16	2.21788	0.0283545	0.590151	-3.58573
PBRM1	0.214018	4.15438e-16	2.21603	0.0284837	0.590151	-3.58932
LEF1	0.3385	-9.31155e-17	2.21566	0.0285097	0.590151	-3.59004
IGHVIII-25-1	0.223535	-1.50417e-16	2.21466	0.0285802	0.590151	-3.59199
CLCP2	0.231346	3.33067e-16	2.21377	0.0286432	0.590151	-3.59372
THSD7A	0.27645	1.93394e-16	2.21367	0.0286498	0.590151	-3.59391
WSB1	0.333116	-1.79068e-16	2.21295	0.0287008	0.590151	-3.59531
MARK2P17	0.22726	-1.8265e-16	2.21287	0.0287065	0.590151	-3.59546
DNAH11	0.213877	2.11301e-16	2.21254	0.0287299	0.590151	-3.59611
UBE2QL1	0.21064	-1.43255e-17	2.21166	0.0287921	0.590151	-3.59781
SORCS2	0.239275	2.00556e-16	2.21124	0.0288223	0.590328	-3.59864
TRIM59	0.380789	8.59528e-17	2.20912	0.028973	0.591316	-3.60275
UCN	0.190139	-2.14882e-16	2.20873	0.0290005	0.591316	-3.6035
TUSC3	0.474782	2.07719e-16	2.20772	0.0290727	0.591729	-3.60546
PLEKHG1	0.367247	3.22323e-17	2.20649	0.029161	0.592377	-3.60785
LSM1P1	0.237625	1.12813e-16	2.20543	0.0292372	0.593482	-3.60991
BHLHE41	0.648589	-3.79625e-16	2.2026	0.0294409	0.595404	-3.61538
ZNF821	0.217816	-2.14882e-17	2.20068	0.0295806	0.595429	-3.61911
NRP1	0.408437	-2.18463e-16	2.19981	0.0296431	0.595429	-3.62078
CHST10	0.270255	-1.79068e-16	2.19848	0.0297401	0.595429	-3.62335
FILIP1L	0.595406	-8.95341e-17	2.19838	0.0297475	0.595429	-3.62355
SMARCA1	0.320028	4.22601e-16	2.19686	0.0298585	0.595775	-3.62648
PRR16	0.355971	-2.04138e-16	2.19665	0.0298738	0.595775	-3.62689
PDPN	0.368953	1.36092e-16	2.19598	0.0299235	0.596329	-3.62819
DUXAP8	0.44454	-2.14882e-17	2.19533	0.0299711	0.596843	-3.62945
ZMYND10-AS1	0.161168	4.01113e-16	2.19457	0.0300269	0.597082	-3.63091
NRIP1	0.329159	3.97531e-16	2.19387	0.0300784	0.597672	-3.63226
LONRF1	0.297756	-1.43255e-17	2.19338	0.0301144	0.597952	-3.6332
ACTG1P13	0.202836	1.0386e-16	2.19189	0.0302244	0.598889	-3.63607
C1QTNF3	0.353112	-1.88022e-16	2.19122	0.0302742	0.598889	-3.63737
RNGTTP1	0.258901	9.31155e-17	2.1909	0.0302978	0.598889	-3.63798
CHTF8P1	0.23425	2.68602e-16	2.18996	0.0303678	0.598889	-3.6398
ZNF331	0.365117	9.66968e-17	2.18959	0.030395	0.598889	-3.6405
TET1	0.276001	5.01391e-17	2.18738	0.03056	0.599729	-3.64477
DNAJB5	0.269928	-1.39673e-16	2.1873	0.0305659	0.599729	-3.64492
NUDT9P1	0.218527	-1.79068e-16	2.18726	0.0305686	0.599729	-3.64499
IGKV1OR22-5	0.258409	-3.76043e-16	2.18721	0.0305722	0.599729	-3.64508
PZP	0.229568	3.43811e-16	2.18611	0.030655	0.600006	-3.64721
CWF19L1	0.266862	-9.66968e-17	2.18607	0.0306574	0.600006	-3.64727
LTBP2	0.248706	2.50696e-16	2.18508	0.0307322	0.600834	-3.64919
MS4A7	0.381671	0	2.18492	0.0307437	0.600834	-3.64948
AGGF1P4	0.137472	6.80459e-17	2.18189	0.0309721	0.603138	-3.6553
TBX5-AS1	0.190765	8.23714e-17	2.17891	0.0311983	0.606678	-3.66103
TREML5P	0.22546	-4.65577e-17	2.177	0.0313436	0.608637	-3.66468
APOC1P1	0.564617	5.01391e-17	2.17514	0.0314861	0.609238	-3.66824
CD163	0.568791	-2.86509e-16	2.17355	0.0316077	0.609736	-3.67127
JMJD1C-AS1	0.238019	1.3251e-16	2.17142	0.031772	0.611233	-3.67535
TMEM256P2	0.217947	-2.47114e-16	2.17137	0.0317761	0.611233	-3.67545
FKBP14	0.260398	2.57858e-16	2.17046	0.0318461	0.611233	-3.67718
GOLGA8M	0.250207	-1.61161e-16	2.17031	0.0318576	0.611233	-3.67746
NOP14-AS1	0.304115	-3.97531e-16	2.17025	0.0318625	0.611233	-3.67758
SGPL1	0.184285	-1.50417e-16	2.16845	0.0320026	0.612528	-3.68103
SS18L2P1	0.252873	-3.36648e-16	2.16791	0.0320444	0.612528	-3.68205
ZMAT3	0.243019	-1.64743e-16	2.16738	0.0320855	0.612528	-3.68306
CEP170	0.265042	3.72462e-16	2.16585	0.0322049	0.612734	-3.68598
NCF1B	0.301932	3.43811e-16	2.16501	0.0322704	0.612734	-3.68757
TMTC1	0.18561	9.31155e-17	2.16414	0.0323389	0.612734	-3.68924
RRP7A	0.266138	-7.16273e-17	2.16309	0.0324217	0.612734	-3.69124
THOC7-AS1	0.285278	-5.01391e-17	2.16281	0.0324435	0.612734	-3.69177
FCN1	0.218995	1.71906e-16	2.16213	0.0324972	0.612734	-3.69307
DKK3	0.471155	5.73018e-17	2.15771	0.0328469	0.616762	-3.70147
PKD2	0.28089	-2.07719e-16	2.15682	0.0329172	0.616762	-3.70315
ABI3BP	0.528682	1.59371e-16	2.1562	0.0329669	0.616762	-3.70433
ZFPM2	0.251021	1.00278e-16	2.15608	0.0329764	0.616762	-3.70456
OR2AS2P	0.207493	1.79068e-17	2.15539	0.0330317	0.616762	-3.70587
TUSC7	0.230393	1.11022e-16	2.1551	0.0330549	0.616762	-3.70642
PTGS1	0.244315	3.83206e-16	2.15396	0.0331459	0.616762	-3.70858
ADIPOQ	0.278666	-1.16394e-16	2.15227	0.0332818	0.616762	-3.71179
C8orf48	0.251586	2.14882e-17	2.15177	0.033322	0.616762	-3.71273
CAP2P1	0.204834	-1.53999e-16	2.15156	0.0333392	0.616762	-3.71314
CD93	0.379559	2.32789e-16	2.15101	0.0333831	0.616762	-3.71417
IDSP1	0.294949	2.90091e-16	2.1508	0.0333999	0.616762	-3.71456
MAF	0.415755	-3.22323e-16	2.14956	0.0335005	0.616762	-3.71692
DEFB115	0.22861	1.61161e-16	2.14877	0.0335639	0.616762	-3.7184
RARB	0.236765	-9.13248e-17	2.14854	0.0335828	0.616762	-3.71884
TRBV14	0.225289	1.46836e-16	2.14471	0.0338945	0.618834	-3.72609
MAGEL2	0.245561	-2.50696e-16	2.14437	0.0339225	0.618834	-3.72673
ADGRE1	0.195516	1.5758e-16	2.14426	0.0339314	0.618834	-3.72694
TTLL8	0.248919	8.23714e-17	2.14236	0.0340874	0.620022	-3.73053
IGHV1-12	0.24058	-1.79068e-16	2.14073	0.034221	0.621052	-3.73359
TRAJ23	0.281626	-1.43255e-17	2.14056	0.034235	0.621052	-3.73391
PLK3	0.209474	2.65021e-16	2.13867	0.0343909	0.621381	-3.73747
TNS3	0.372967	-1.93394e-16	2.13754	0.0344852	0.621381	-3.73962
AFF3	0.422317	1.8265e-16	2.13724	0.03451	0.621381	-3.74018
SIK1	0.475867	-3.97531e-16	2.13716	0.0345165	0.621381	-3.74033
NEFL	0.243267	1.64743e-16	2.13705	0.0345255	0.621381	-3.74053
FOXN3-AS2	0.219278	3.9395e-17	2.13566	0.0346409	0.621381	-3.74314
RHOBTB1	0.272076	-4.29764e-17	2.13512	0.0346864	0.621381	-3.74417
CDH6	0.216114	-1.86231e-16	2.13497	0.0346985	0.621381	-3.74444
PDZRN3	0.21112	-3.86787e-16	2.13496	0.0346992	0.621381	-3.74446
BLOC1S6	0.316097	2.00556e-16	2.13366	0.0348077	0.621381	-3.7469
RGN	0.213805	2.07719e-16	2.13346	0.0348249	0.621381	-3.74729
ITGAV	0.268165	2.04138e-16	2.13301	0.0348626	0.621381	-3.74814
TPM4	0.260934	-3.58136e-16	2.13116	0.0350176	0.622241	-3.75161
FCRL2	0.290562	1.77278e-16	2.13062	0.0350629	0.622423	-3.75262
TNFAIP3	0.465558	-9.31155e-17	2.13001	0.0351146	0.622531	-3.75377
TRANK1	0.253744	3.22323e-16	2.12764	0.0353146	0.623648	-3.75821
GDI1	0.226452	4.44089e-16	2.12666	0.0353973	0.62381	-3.76004
ZNF652P1	0.231597	2.14882e-16	2.12636	0.0354229	0.62381	-3.76061
CPA3	0.539195	2.11301e-16	2.12601	0.0354529	0.62381	-3.76127
C1orf162	0.49489	2.93672e-16	2.12591	0.0354609	0.62381	-3.76145
RPL7P39	0.209804	-5.37205e-17	2.12434	0.0355947	0.62469	-3.76439
ARL4D	0.188148	1.43255e-16	2.12425	0.0356024	0.62469	-3.76456
SS18L2P2	0.24751	2.22045e-16	2.12364	0.0356543	0.624862	-3.7657
TRIM26BP	0.198415	1.68324e-16	2.12347	0.0356687	0.624862	-3.76602
CDKN2B-AS1	0.256898	0	2.11884	0.036066	0.629162	-3.77467
DHX38	0.205114	-1.71906e-16	2.11756	0.0361767	0.629162	-3.77707
C3AR1	0.387787	-1.11022e-16	2.11746	0.0361857	0.629162	-3.77726
ITPRIP	0.203686	7.16273e-18	2.11657	0.0362628	0.629162	-3.77892
CBLB	0.33575	1.07441e-16	2.11634	0.0362825	0.629162	-3.77935
ACAP3	0.173101	-3.1516e-16	2.11598	0.0363138	0.629162	-3.78002
ADGRA2	0.311091	-8.23714e-17	2.11593	0.0363182	0.629162	-3.78012
SCRG1	0.336728	-1.59371e-16	2.11354	0.0365252	0.631536	-3.78455
ZHX2	0.333757	-3.58136e-17	2.11231	0.0366332	0.631536	-3.78686
HCG15	0.229873	1.64743e-16	2.11226	0.0366371	0.631536	-3.78694
PCOLCE	0.22566	3.43811e-16	2.11113	0.0367365	0.632162	-3.78906
SH3PXD2A	0.252411	2.43533e-16	2.10996	0.0368387	0.632162	-3.79123
KATNAL1	0.248533	-1.79068e-16	2.10614	0.0371758	0.632963	-3.79834
JUN	0.293721	-2.11301e-16	2.10608	0.0371808	0.632963	-3.79844
OR9H1P	0.233508	1.43255e-17	2.10606	0.0371822	0.632963	-3.79847
DUSP22	0.158372	1.43255e-17	2.106	0.0371878	0.632963	-3.79859
PIAS3	0.394306	2.14882e-16	2.10477	0.0372969	0.632963	-3.80087
ANXA8L1	0.242982	-2.04138e-16	2.10401	0.0373646	0.632963	-3.80229
ICE2P1	0.222722	-2.50696e-17	2.10298	0.037456	0.632963	-3.80419
SH3D21	0.358668	-1.14604e-16	2.10217	0.0375282	0.632963	-3.8057
OTP	0.277939	-2.32789e-16	2.10169	0.0375709	0.632963	-3.80658
ASXL3	0.226546	4.47671e-17	2.10159	0.0375797	0.632963	-3.80676
C3orf18	0.300183	1.43255e-16	2.10116	0.0376183	0.632963	-3.80757
HEIH	0.227708	-7.879e-17	2.0998	0.03774	0.632963	-3.81008
ZGLP1	0.248472	5.73018e-17	2.09878	0.0378317	0.632963	-3.81198
RBMY2JP	0.255531	8.23714e-17	2.0985	0.0378566	0.632963	-3.81249
GNAI2P1	0.326166	-4.15438e-16	2.09849	0.037858	0.632963	-3.81252
MTCO1P51	0.207882	2.14882e-17	2.09848	0.0378591	0.632963	-3.81254
MAN1B1	0.198381	1.28929e-16	2.0976	0.0379375	0.633027	-3.81415
TPM2	0.237666	4.15438e-16	2.09436	0.0382302	0.636052	-3.82014
MEIS1	0.380742	-3.43811e-16	2.09234	0.038414	0.637943	-3.82388
PLEKHO1	0.244214	-2.93672e-16	2.09199	0.0384463	0.638091	-3.82453
MMP7	0.433465	8.59528e-17	2.09098	0.0385377	0.638444	-3.82638
ZNF815P	0.197286	-3.07997e-16	2.08981	0.0386453	0.639063	-3.82856
CDY12P	0.265213	1.14604e-16	2.08848	0.0387664	0.640166	-3.83099
VSX2	0.166404	1.07441e-16	2.08794	0.0388167	0.640166	-3.832
IGHG3	0.748003	-6.08832e-16	2.08712	0.0388919	0.640166	-3.83351
IGK	0.759328	9.31155e-17	2.08631	0.0389664	0.640166	-3.835
RFX8	0.202024	9.66968e-17	2.08472	0.0391131	0.640166	-3.83793
P3H1	0.208896	3.72462e-16	2.08454	0.03913	0.640166	-3.83826
TCEA1P3	0.207247	6.98366e-17	2.08393	0.0391863	0.640166	-3.83938
LPP-AS2	0.185438	-2.22045e-16	2.08388	0.0391909	0.640166	-3.83947
TTC14	0.313127	2.3637e-16	2.0838	0.0391982	0.640166	-3.83962
PKIA	0.349899	6.26739e-17	2.08368	0.0392097	0.640166	-3.83984
DNAJB8-AS1	0.154647	-2.29207e-16	2.08363	0.0392143	0.640166	-3.83994
HOTAIRM1	0.418487	1.79068e-16	2.08229	0.0393383	0.641202	-3.84239
DCHS1	0.359899	3.58136e-17	2.08114	0.0394453	0.642484	-3.84451
DUSP15	0.259847	1.43255e-17	2.07945	0.0396033	0.642714	-3.84762
OPCML-IT1	0.203769	6.80459e-17	2.07817	0.0397228	0.643037	-3.84996
HAVCR2	0.251305	-1.28929e-16	2.07814	0.0397259	0.643037	-3.85002
NRBP1	0.289616	4.08276e-16	2.07774	0.0397631	0.643037	-3.85075
SNORD94	0.238392	-2.50696e-16	2.0772	0.0398139	0.643037	-3.85174
TBC1D3G	0.187722	-5.01391e-17	2.07706	0.0398268	0.643037	-3.85199
A4GALT	0.301203	-1.14604e-16	2.07678	0.0398534	0.643037	-3.85251
MAFF	0.213986	-1.43255e-17	2.07636	0.0398921	0.643037	-3.85327
ZMIZ1	0.337102	-1.14604e-16	2.07535	0.0399879	0.643037	-3.85513
RPS3AP52	0.222994	-7.16273e-18	2.07531	0.0399914	0.643037	-3.8552
LRRN1	0.246834	-8.59528e-17	2.07514	0.0400075	0.643037	-3.85551
GOLGA6L4	0.205479	2.50696e-17	2.07505	0.0400161	0.643037	-3.85568
OTOS	0.193438	7.16273e-17	2.07318	0.0401922	0.644728	-3.8591
AFAP1L1	0.21729	-2.04138e-16	2.07197	0.0403073	0.645178	-3.86132
ARHGAP28	0.222813	1.79068e-17	2.07131	0.0403697	0.645178	-3.86252
VASH1	0.256631	-6.08832e-17	2.07056	0.0404409	0.645178	-3.86389
RPL17P46	0.183141	-2.18463e-16	2.07005	0.0404899	0.645178	-3.86483
CALU	0.211094	-2.86509e-17	2.06792	0.0406926	0.645178	-3.86871
SNORD67	0.253954	7.879e-17	2.06777	0.0407077	0.645178	-3.869
GJA1	0.2615	-2.39951e-16	2.06747	0.0407357	0.645178	-3.86953
LRRK2	0.301323	2.11301e-16	2.06745	0.0407374	0.645178	-3.86957
CYGB	0.21897	3.90369e-16	2.06742	0.0407409	0.645178	-3.86963
RASSF4	0.316005	-1.28929e-16	2.06736	0.0407468	0.645178	-3.86975
GTF2IP2	0.215141	2.32789e-17	2.06729	0.0407533	0.645178	-3.86987
TCF7L1-IT1	0.245668	6.80459e-17	2.06701	0.0407803	0.645178	-3.87038
GTF2F2P1	0.192456	1.80859e-16	2.06671	0.0408092	0.645178	-3.87094
OR10J4	0.228638	7.16273e-18	2.06663	0.0408169	0.645178	-3.87108
TMEM127	0.23936	-1.53999e-16	2.06628	0.0408501	0.645178	-3.87171
FMNL3	0.329403	-7.16273e-18	2.06429	0.0410415	0.645178	-3.87534
IGKV1OR1-1	0.304477	-1.96975e-16	2.06348	0.041119	0.645178	-3.87681
GOLGA8CP	0.16416	-4.29764e-16	2.06302	0.0411643	0.645178	-3.87766
CPNE8	0.376641	-2.32789e-16	2.06221	0.0412424	0.645699	-3.87913
KATNB1	0.194378	5.01391e-17	2.06178	0.0412841	0.645699	-3.87992
KYNU	0.285435	-8.05807e-17	2.06103	0.0413565	0.646316	-3.88128
USP50	0.273092	1.96975e-16	2.06004	0.041453	0.646695	-3.88309
TMEM39B	0.30238	-3.1516e-16	2.05863	0.0415896	0.646695	-3.88564
RECK	0.234976	1.07441e-17	2.05858	0.0415943	0.646695	-3.88573
MYL4	0.235765	-3.97531e-16	2.05854	0.041599	0.646695	-3.88582
DGAT2L6	0.253657	-1.07441e-17	2.05753	0.0416974	0.646785	-3.88765
SLIT2-IT1	0.213149	-9.66968e-17	2.05656	0.041792	0.646785	-3.88941
SLC35E4	0.209575	-1.93394e-16	2.05643	0.0418051	0.646785	-3.88965
ALG9-IT1	0.190121	-8.05807e-17	2.05575	0.0418713	0.646913	-3.89088
CABP1	0.228236	1.61161e-16	2.0552	0.0419254	0.647059	-3.89188
SKIL	0.431433	2.82928e-16	2.05335	0.0421072	0.647264	-3.89524
IGKV1D-22	0.288861	1.79068e-16	2.05312	0.0421299	0.647264	-3.89566
PLCXD3	0.247114	-2.18463e-16	2.05305	0.0421366	0.647264	-3.89578
TNS2	0.225032	-2.18463e-16	2.05254	0.042187	0.647264	-3.89671
LRRC43	0.242533	-1.18185e-16	2.05244	0.0421963	0.647264	-3.89688
OR8G1	0.229313	6.44646e-17	2.05014	0.0424244	0.647264	-3.90106
SULT6B1	0.206571	-2.50696e-17	2.04932	0.0425059	0.647264	-3.90255
GPS2P1	0.18586	-6.80459e-17	2.0489	0.0425472	0.647264	-3.9033
HMGN2P18	0.200825	7.16273e-17	2.04814	0.0426227	0.647264	-3.90467
ZCWPW2	0.186947	7.69993e-17	2.04791	0.042646	0.647264	-3.9051
TSHZ3	0.271616	1.64743e-16	2.0479	0.042647	0.647264	-3.90512
SEL1L	0.327641	-2.14882e-17	2.04778	0.0426586	0.647264	-3.90533
AP4M1	0.257106	-1.79068e-17	2.04717	0.0427195	0.647264	-3.90643
SRY	0.214516	6.80459e-17	2.04633	0.0428031	0.647264	-3.90795
PTPRJ	0.262343	-3.76043e-17	2.04621	0.0428149	0.647264	-3.90816
ZDHHC15	0.347382	-7.3418e-17	2.04536	0.0429005	0.647264	-3.90971
ABL2	0.277952	-3.61718e-16	2.04404	0.0430323	0.647264	-3.91209
RPL21P122	0.196911	-1.96975e-16	2.04385	0.043052	0.647264	-3.91244
ENOX1-AS1	0.204108	-1.11022e-16	2.04361	0.0430752	0.647264	-3.91286
BRF1	0.218699	-1.50417e-16	2.04278	0.043159	0.647264	-3.91436
CEP170P1	0.241586	-2.65021e-16	2.04278	0.0431591	0.647264	-3.91437
PGM5P4-AS1	0.192981	4.29764e-17	2.04263	0.0431738	0.647264	-3.91463
DACT1	0.310211	-2.93672e-16	2.04182	0.0432563	0.647264	-3.91611
IGKV1-12	0.316445	-8.59528e-17	2.04171	0.0432665	0.647264	-3.91629
FZD7	0.38691	-2.47114e-16	2.04146	0.0432923	0.647264	-3.91675
GPX1P1	0.218697	3.72462e-16	2.0406	0.0433784	0.647264	-3.91829
SCAMP4	0.257733	3.22323e-16	2.04059	0.0433802	0.647264	-3.91832
OLR1	0.397532	3.43811e-16	2.03744	0.0436992	0.649603	-3.924
BBS9	0.369539	-2.02347e-16	2.03735	0.0437082	0.649603	-3.92416
PCED1CP	0.16127	6.44646e-17	2.03629	0.0438161	0.650304	-3.92606
ACKR1	0.27733	3.29486e-16	2.03567	0.0438792	0.650304	-3.92718
TSR1	0.153595	4.08276e-16	2.03482	0.0439661	0.650304	-3.92871
PLPP1	0.273562	-1.28929e-16	2.03391	0.0440597	0.650304	-3.93036
CPQ	0.357595	2.14882e-16	2.03362	0.0440884	0.650304	-3.93086
PRINS	0.207004	-1.11022e-16	2.0331	0.0441425	0.650304	-3.93181
ATXN7L1	0.262246	-7.16273e-17	2.03136	0.0443213	0.650304	-3.93494
DEFB105B	0.196689	1.00278e-16	2.03003	0.044458	0.651113	-3.93732
TSPY16P	0.162418	2.65021e-16	2.02961	0.0445014	0.651113	-3.93807
AVPR1A	0.251395	1.07441e-16	2.02921	0.0445424	0.651364	-3.93879
DMRTC2	0.19946	1.93394e-16	2.02858	0.0446082	0.651977	-3.93993
IGF1	0.211869	3.65299e-16	2.02804	0.0446641	0.652273	-3.94089
NFATC4	0.212588	-3.97531e-16	2.02746	0.044724	0.652273	-3.94193
CDH12P4	0.166223	1.89812e-16	2.02599	0.0448769	0.653804	-3.94457
MLC1	0.212521	-9.31155e-17	2.02318	0.0451691	0.655612	-3.94959
PLPP3	0.388298	-1.79068e-16	2.02192	0.0453016	0.656489	-3.95185
ZNF271P	0.237555	8.59528e-17	2.02041	0.04546	0.656797	-3.95455
TRPC6P	0.188433	1.3251e-16	2.02033	0.0454682	0.656797	-3.95469
VEGFC	0.319552	2.75765e-16	2.0201	0.0454928	0.656797	-3.9551
SSH1	0.201887	-2.29207e-16	2.01832	0.0456799	0.656797	-3.95828
PTGIS	0.286675	-5.37205e-17	2.01802	0.0457113	0.656797	-3.95881
PLEK	0.419424	4.01113e-16	2.01748	0.0457691	0.656797	-3.95978
TNFAIP8	0.301185	-1.96975e-16	2.01673	0.0458478	0.656797	-3.96111
B3GALNT1P1	0.177161	-9.66968e-17	2.01665	0.045857	0.656797	-3.96126
PMP22	0.488846	8.95341e-17	2.01638	0.0458856	0.656797	-3.96175
CSRP1	0.39079	-5.73018e-17	2.01624	0.0459008	0.656797	-3.962
APOC1	0.705943	0	2.01621	0.0459033	0.656797	-3.96204
ADHFE1	0.302564	-1.79068e-17	2.01346	0.0461961	0.656797	-3.96695
PHLDB2	0.38998	6.44646e-17	2.01316	0.0462275	0.656797	-3.96748
IQCB2P	0.164951	3.9395e-17	2.0128	0.0462662	0.656797	-3.96812
CLIC4P3	0.220287	-1.79068e-16	2.0121	0.0463412	0.656797	-3.96937
NIM1K	0.227665	1.61161e-16	2.01179	0.0463739	0.656797	-3.96992
SPI1	0.312029	3.9395e-17	2.01176	0.0463774	0.656797	-3.96997
RFPL4AP3	0.230504	-1.5758e-16	2.01101	0.0464574	0.656797	-3.97131
MBNL1	0.432645	-3.1516e-16	2.01062	0.0464993	0.656797	-3.972
CMTR2	0.349773	2.18463e-16	2.01041	0.0465218	0.656797	-3.97238
NPM1P9	0.21275	3.58136e-18	2.01025	0.0465386	0.656797	-3.97265
PEA15	0.364272	3.58136e-17	2.00841	0.0467373	0.656797	-3.97594
SLC2A3	0.483264	4.33345e-16	2.00772	0.0468108	0.656797	-3.97715
CYTIP	0.331459	-2.3637e-16	2.00728	0.0468585	0.656797	-3.97794
CBX7	0.223501	1.86231e-16	2.0064	0.0469536	0.657398	-3.9795
PYY	0.182683	3.9395e-16	2.00411	0.0472013	0.658984	-3.98356
NR1H2	0.268138	-1.43255e-17	2.00344	0.0472747	0.658984	-3.98476
RHO	0.225662	-9.31155e-17	2.00335	0.047284	0.658984	-3.98491
FSIP1	0.201261	-4.65577e-17	2.00154	0.0474813	0.659065	-3.98812
PRR20FP	0.223849	-2.07719e-16	2.0015	0.0474862	0.659065	-3.9882
FLJ43663	0.334887	-2.90091e-16	2.001	0.0475405	0.659065	-3.98908
LEF1-AS1	0.272309	-1.14604e-16	2.00036	0.0476098	0.659065	-3.9902
TRIM45	0.23248	-1.89812e-16	1.99915	0.0477426	0.659065	-3.99235
HCK	0.240325	-4.29764e-17	1.99765	0.0479075	0.659422	-3.99501
HMGA1P5	0.171375	7.16273e-17	1.99748	0.0479259	0.659422	-3.9953
SRGAP2C	0.424362	1.18185e-16	1.99711	0.0479671	0.659422	-3.99596
ARL5AP4	0.214945	-1.93394e-16	1.9971	0.0479676	0.659422	-3.99597
CFAP73	0.194381	3.4023e-16	1.99527	0.0481694	0.660957	-3.99921
SIT1	0.194145	1.61161e-16	1.99423	0.0482842	0.662108	-4.00104
ZNF674	0.185588	1.21766e-16	1.99312	0.048408	0.662459	-4.00301
POT1-AS1	0.250034	4.29764e-17	1.99299	0.0484223	0.662459	-4.00324
FAM193B	0.239794	1.5758e-16	1.99214	0.0485165	0.663293	-4.00473
PIP4K2A	0.388992	3.58136e-18	1.99166	0.0485697	0.663688	-4.00558
RPL7P31	0.196971	1.8444e-16	1.9909	0.0486548	0.664187	-4.00693
IGKV1-5	0.302515	-1.64743e-16	1.99043	0.0487065	0.66456	-4.00774
TATDN2P3	0.168065	-2.11301e-16	1.98824	0.0489517	0.665169	-4.01161
IGHV2-70	0.326405	2.22045e-16	1.98756	0.0490282	0.665169	-4.01281
SNAI3	0.183007	-2.65021e-16	1.98709	0.0490807	0.665169	-4.01363
PECR	0.197915	4.29764e-17	1.98708	0.0490819	0.665169	-4.01365
FLJ42969	0.174898	1.79068e-16	1.98673	0.049121	0.665169	-4.01427
IGKV1D-39	0.645621	1.3251e-16	1.98631	0.0491684	0.665169	-4.01501
ZSCAN16-AS1	0.156534	-1.86231e-16	1.98531	0.0492805	0.665851	-4.01676
TMEM115	0.215019	-4.29764e-16	1.98439	0.0493846	0.666814	-4.01838
IGKV2-4	0.209027	-3.58136e-16	1.98362	0.0494714	0.66719	-4.01973
TCEAL2	0.209073	-1.21766e-16	1.98329	0.0495091	0.66719	-4.02032
SGK1	0.407851	-3.11579e-16	1.98229	0.0496216	0.668032	-4.02206
TK2	0.234328	8.59528e-17	1.98086	0.0497841	0.668888	-4.02458
ACTB	0.249258	4.29764e-17	1.98065	0.0498077	0.668888	-4.02494
FAM90A23P	0.194117	3.58136e-17	1.98004	0.0498778	0.6695	-4.02602
ZEB2	0.23855	-1.68324e-16	1.97957	0.0499312	0.669829	-4.02685
BST1	0.293371	1.71906e-16	1.97811	0.0500977	0.670146	-4.02941
IGHV1-45	0.243973	3.58136e-18	1.97674	0.0502544	0.671034	-4.03181
SLC16A6	0.200391	-1.62952e-16	1.97551	0.0503952	0.671259	-4.03396
FBXO42	0.171218	-3.43811e-16	1.97535	0.0504135	0.671259	-4.03423
SERTAD4-AS1	0.274996	-9.66968e-17	1.97489	0.0504666	0.671259	-4.03504
KLHL24	0.232793	-1.21766e-16	1.97435	0.0505283	0.671301	-4.03598
DUSP14	0.260092	-1.21766e-16	1.97295	0.0506891	0.672751	-4.03842
CDON	0.240561	1.59371e-16	1.97221	0.050775	0.672751	-4.03972
MSANTD3-TMEFF1	0.206251	9.31155e-17	1.97198	0.0508019	0.672751	-4.04013
CCDC85B	0.182927	-1.36092e-16	1.97127	0.0508839	0.672751	-4.04137
CBX3P6	0.249694	-3.58136e-17	1.96924	0.0511186	0.673692	-4.0449
DST	0.53451	4.15438e-16	1.9686	0.0511935	0.673692	-4.04603
CDY14P	0.252642	1.89812e-16	1.96853	0.0512018	0.673692	-4.04615
MSC-AS1	0.251537	5.37205e-17	1.96698	0.0513821	0.67375	-4.04885
ZFYVE16	0.292893	1.68324e-16	1.9666	0.0514261	0.67375	-4.0495
IGF1R	0.297044	1.0386e-16	1.96611	0.0514836	0.67375	-4.05036
VPREB3	0.264939	1.86231e-16	1.96564	0.0515392	0.67375	-4.05119
FAM205A	0.190767	2.0951e-16	1.96529	0.0515802	0.67375	-4.0518
CILP	0.216793	1.25348e-16	1.96462	0.0516577	0.67375	-4.05295
RASSF8	0.206057	-4.15438e-16	1.96452	0.0516701	0.67375	-4.05314
FAM87A	0.147974	4.01113e-16	1.96392	0.0517403	0.67375	-4.05418
FILIP1	0.226679	2.07719e-16	1.96378	0.0517566	0.67375	-4.05442
IGHV3OR16-10	0.254498	1.79068e-16	1.96358	0.0517805	0.67375	-4.05477
KLF15	0.201812	-1.8265e-16	1.96342	0.0517985	0.67375	-4.05504
RPS6KB2	0.183116	-3.58136e-17	1.96269	0.0518843	0.673829	-4.05631
DNM1P34	0.187943	-3.36648e-16	1.96119	0.0520617	0.674017	-4.05893
CYP1B1-AS1	0.199642	4.36926e-16	1.96107	0.0520756	0.674017	-4.05913
RHOU	0.20203	-3.50974e-16	1.96049	0.052144	0.674017	-4.06014
RBMS3	0.338178	-3.54555e-16	1.96029	0.0521676	0.674017	-4.06049
FHAD1	0.262707	4.29764e-17	1.96017	0.0521823	0.674017	-4.0607
TRPC2	0.18521	-1.71906e-16	1.95821	0.0524137	0.67511	-4.0641
EIF1B-AS1	0.179713	8.77434e-17	1.957	0.0525577	0.675839	-4.0662
ADCY7	0.211822	1.53999e-16	1.95543	0.0527447	0.67713	-4.06892
WEE2-AS1	0.149302	2.00556e-16	1.955	0.0527957	0.677146	-4.06966
P2RX1	0.1572	2.93672e-16	1.95463	0.0528402	0.677146	-4.07031
ESYT3	0.17735	1.14604e-16	1.95442	0.052866	0.677146	-4.07068
MAK	0.19709	7.879e-17	1.95412	0.0529014	0.677146	-4.07119
SLC25A30	0.253722	-1.45045e-16	1.95394	0.0529228	0.677146	-4.0715
HTRA3	0.205513	-4.40508e-16	1.95378	0.0529416	0.677146	-4.07178
OSMR	0.268536	-2.14882e-16	1.95365	0.0529578	0.677146	-4.07201
SERPINH1P1	0.275583	1.43255e-16	1.95349	0.0529772	0.677146	-4.07229
GAB3	0.287731	-3.72462e-16	1.95169	0.053193	0.678976	-4.07541
EN1	0.196957	-4.33345e-16	1.95038	0.05335	0.679287	-4.07766
RBMY2HP	0.18705	-1.86231e-16	1.94999	0.0533975	0.679287	-4.07834
DPY19L2P5	0.197809	1.43255e-17	1.94938	0.053471	0.679287	-4.0794
TSPY19P	0.189924	-1.21766e-16	1.94891	0.0535278	0.679287	-4.08021
RSAD2	0.222283	-3.36648e-16	1.94857	0.0535689	0.679287	-4.0808
UBE2WP1	0.200626	-1.5758e-16	1.94828	0.053604	0.679287	-4.0813
DDX39BP1	0.182305	3.58136e-16	1.94759	0.0536874	0.679287	-4.08249
ALPK3	0.267666	-1.75487e-16	1.9466	0.0538069	0.679287	-4.08419
ZNF333	0.205533	1.25348e-16	1.94533	0.0539616	0.679861	-4.08639
MAGED1	0.26293	-2.05928e-16	1.944	0.054124	0.680685	-4.08869
MTND2P16	0.265751	1.43255e-16	1.94397	0.0541267	0.680685	-4.08873
POP5	0.198926	-1.91603e-16	1.94274	0.0542768	0.682068	-4.09085
ABCC5	0.235936	-3.58136e-17	1.94237	0.0543225	0.682068	-4.09149
U2AF1L4	0.151862	2.14882e-17	1.94236	0.0543233	0.682068	-4.0915
RBM24	0.222389	-4.29764e-16	1.94126	0.0544587	0.682068	-4.0934
GPR1	0.18777	-1.39673e-16	1.941	0.0544905	0.682068	-4.09385
BEX4	0.236033	-3.72462e-16	1.94077	0.0545178	0.682068	-4.09424
GHR	0.255823	1.75487e-16	1.94023	0.0545842	0.682068	-4.09517
SEC14L2	0.20371	-2.57858e-16	1.94018	0.0545909	0.682068	-4.09526
IGSF6	0.347226	3.72462e-16	1.93981	0.0546362	0.682068	-4.09589
OSER1	0.199085	-2.11301e-16	1.93964	0.0546578	0.682068	-4.0962
PRDX2P3	0.221339	-1.96975e-16	1.93933	0.0546957	0.682068	-4.09673
IL1R1	0.267004	3.58136e-16	1.93769	0.0548971	0.682797	-4.09954
NAP1L4P1	0.187947	-2.14882e-17	1.93765	0.0549018	0.682797	-4.0996
SMAD7	0.304004	2.14882e-16	1.93699	0.0549835	0.682797	-4.10074
FAM99B	0.168066	-2.47114e-16	1.93635	0.0550625	0.682797	-4.10184
SNORA69	0.355098	-1.00278e-16	1.93616	0.055087	0.682797	-4.10218
DKK2	0.362843	4.1902e-16	1.9353	0.0551927	0.682797	-4.10364
IGHV4-39	0.342833	-1.64743e-16	1.93528	0.0551955	0.682797	-4.10368
SLC5A4P1	0.194636	8.23714e-17	1.93419	0.0553311	0.682797	-4.10556
ARHGEF15	0.245704	-1.3251e-16	1.93416	0.055335	0.682797	-4.10561
GSN	0.276783	1.50417e-16	1.93404	0.0553494	0.682797	-4.10581
KRTAP5-AS1	0.156168	4.36926e-16	1.93266	0.0555213	0.683165	-4.10818
OR5AK1P	0.186974	1.89812e-16	1.93136	0.0556834	0.683615	-4.11041
PPP1R3C	0.202507	1.79068e-16	1.93101	0.0557264	0.683615	-4.111
GSTM3	0.462588	-1.23557e-16	1.93091	0.0557399	0.683615	-4.11118
LTBP1	0.207597	3.9395e-16	1.93083	0.0557499	0.683615	-4.11132
PGGT1BP2	0.161414	-4.65577e-17	1.93013	0.0558371	0.683615	-4.11251
VAMP2	0.246717	1.21766e-16	1.92938	0.055931	0.683615	-4.11379
MTCO3P30	0.191119	5.73018e-17	1.92912	0.0559632	0.683615	-4.11423
FAM160B2	0.197077	-1.71906e-16	1.92881	0.0560023	0.683615	-4.11477
GREM2	0.269346	3.18741e-16	1.9281	0.0560911	0.683615	-4.11598
KCNAB1	0.246366	3.22323e-17	1.92808	0.0560941	0.683615	-4.11602
CDH20	0.210062	1.21766e-16	1.92798	0.0561062	0.683615	-4.11618
PEX5L-AS2	0.219208	2.75765e-16	1.92773	0.0561374	0.683615	-4.11661
TXNRD3	0.258309	-1.79068e-17	1.92752	0.0561644	0.683639	-4.11698
CLEC14A	0.163609	-2.79346e-16	1.92717	0.0562081	0.683865	-4.11757
TMEM235	0.175584	-8.23714e-17	1.92529	0.0564451	0.685896	-4.12078
STEAP3	0.213094	1.36092e-16	1.92515	0.0564629	0.685896	-4.12102
AKAP13	0.354205	-1.28929e-16	1.92475	0.0565143	0.685995	-4.12172
TSPY11P	0.192094	-1.59371e-16	1.92396	0.0566136	0.685995	-4.12306
CCM2	0.284491	-2.04138e-16	1.92391	0.0566204	0.685995	-4.12315
GNGT1	0.197728	6.26739e-17	1.92215	0.0568434	0.687002	-4.12615
TMEM105	0.192616	2.43533e-16	1.92175	0.0568938	0.687308	-4.12682
IGHV3-25	0.200814	2.43533e-16	1.92127	0.056955	0.687742	-4.12764
APC	0.322163	-1.28929e-16	1.92087	0.0570056	0.688049	-4.12832
IGKV6D-21	0.259752	2.14882e-16	1.92066	0.0570335	0.688081	-4.12869
PTGES3P5	0.179358	-1.89812e-16	1.91952	0.0571779	0.689057	-4.13062
COL2A1	0.230637	-1.3251e-16	1.91916	0.0572242	0.689057	-4.13124
IGHV3-33	0.269989	-4.36926e-16	1.91891	0.057257	0.689057	-4.13168
RCN3	0.185768	1.93394e-16	1.91857	0.0573	0.689057	-4.13225
MYADM	0.365404	3.25904e-16	1.91723	0.0574718	0.689104	-4.13453
CAMK4	0.25262	7.16273e-18	1.91357	0.0579424	0.689668	-4.14075
MSLN	0.514049	-7.52087e-17	1.91338	0.0579668	0.689668	-4.14107
RNF169	0.210177	2.50696e-16	1.91291	0.0580278	0.689668	-4.14187
MARK2P8	0.218499	-2.11301e-16	1.91286	0.058034	0.689668	-4.14195
IGKV1D-35	0.239711	3.61718e-16	1.91269	0.0580565	0.689668	-4.14225
IGKV2-29	0.330424	-1.07441e-16	1.91251	0.0580792	0.689668	-4.14255
RBMX2P2	0.195714	9.31155e-17	1.91208	0.0581353	0.689668	-4.14328
EXOSC3P2	0.198927	1.8265e-16	1.9113	0.0582368	0.689668	-4.14461
GABARAPL1	0.557509	1.71906e-16	1.91073	0.0583099	0.689668	-4.14557
PSMC1P3	0.185778	1.8265e-16	1.90909	0.058524	0.690283	-4.14836
MCEMP1	0.216233	-2.6144e-16	1.9084	0.058614	0.690371	-4.14953
C6	0.228645	-4.65577e-17	1.90749	0.0587326	0.691111	-4.15107
PCDH11X	0.275156	1.46836e-16	1.90733	0.0587528	0.691111	-4.15133
GNG2	0.33773	-4.44089e-16	1.9064	0.0588744	0.69141	-4.1529
PIGFP3	0.207807	3.4023e-17	1.90553	0.058989	0.69141	-4.15438
CACNA1C	0.265727	4.11857e-16	1.90552	0.0589904	0.69141	-4.1544
SWT1	0.206597	1.02069e-16	1.9055	0.0589922	0.69141	-4.15443
GNAO1	0.234268	2.6144e-16	1.90391	0.0592007	0.691533	-4.15711
RBSN	0.162627	3.43811e-16	1.90377	0.0592193	0.691533	-4.15735
UNC45A	0.192478	2.25626e-16	1.9036	0.0592418	0.691533	-4.15764
MMP23B	0.231178	-4.29764e-17	1.90208	0.059443	0.692664	-4.16022
HDX	0.284556	-7.16273e-17	1.90021	0.0596891	0.694939	-4.16336
PLA2G12AP2	0.202946	4.29764e-17	1.89975	0.0597504	0.695193	-4.16414
NRBF2	0.196513	3.29486e-16	1.8989	0.0598638	0.695193	-4.16559
CFAP100	0.183249	4.47671e-17	1.8985	0.0599169	0.695193	-4.16626
IGHVII-60-1	0.206627	-3.9395e-17	1.89748	0.0600515	0.695193	-4.16797
IGLVI-20	0.264683	2.82928e-16	1.89706	0.0601078	0.695193	-4.16868
GPATCH11	0.239845	1.79068e-17	1.89569	0.060291	0.695193	-4.17099
BNIP3P1	0.229719	-4.40508e-16	1.89563	0.0602982	0.695193	-4.17108
TPM4P1	0.195753	-2.14882e-16	1.89505	0.0603758	0.695193	-4.17206
FAM204CP	0.160451	2.22045e-16	1.89406	0.0605079	0.695193	-4.17372
SNRPN	0.272107	1.71906e-16	1.89398	0.0605194	0.695193	-4.17387
GJB2	0.407939	3.58136e-17	1.8938	0.0605432	0.695193	-4.17417
CD53	0.469621	3.83206e-16	1.89311	0.0606354	0.695193	-4.17532
ADAMTSL4-AS1	0.237395	1.00278e-16	1.89298	0.060653	0.695193	-4.17554
MFAP4	0.274312	1.50417e-16	1.89263	0.0607001	0.69544	-4.17613
HMGB1P15	0.199833	4.83484e-17	1.89212	0.0607685	0.69564	-4.17699
KSR1P1	0.19082	-2.86509e-17	1.89167	0.0608292	0.696043	-4.17775
TNFSF8	0.233286	7.52087e-17	1.8912	0.0608926	0.696185	-4.17854
THRAP3P1	0.188665	4.29764e-17	1.8903	0.0610142	0.697284	-4.18005
FAM89B	0.225108	-2.00556e-16	1.8898	0.0610813	0.697758	-4.18089
PTGES	0.155615	3.29486e-16	1.88898	0.0611914	0.697853	-4.18226
KCNE4	0.226612	2.18463e-16	1.88872	0.0612269	0.697853	-4.1827
NAV2-IT1	0.179056	1.68324e-16	1.888	0.0613244	0.697853	-4.18391
IGKV3OR2-268	0.255744	-2.29207e-16	1.88709	0.0614475	0.697853	-4.18543
TANC2	0.18396	1.21766e-16	1.88675	0.0614947	0.698045	-4.18601
ROBO1	0.409441	-2.22045e-16	1.88478	0.0617615	0.699055	-4.1893
CCNT2-AS1	0.144432	3.72462e-16	1.88466	0.061779	0.699055	-4.18951
CAHM	0.216401	2.22045e-16	1.88449	0.061801	0.699055	-4.18978
TTC24	0.110035	-4.36926e-16	1.88443	0.0618094	0.699055	-4.18989
PLIN1	0.266465	-3.43811e-16	1.88177	0.0621726	0.700015	-4.19433
EVA1C	0.239403	1.0386e-16	1.88172	0.0621801	0.700015	-4.19442
HCG4P3	0.212168	3.22323e-17	1.88158	0.0621992	0.700015	-4.19466
SOCS3	0.208509	-5.01391e-17	1.8814	0.0622242	0.700015	-4.19496
CCDC180	0.189598	3.36648e-16	1.8809	0.0622924	0.700015	-4.19579
WT1	0.241093	-4.29764e-17	1.88085	0.0622989	0.700015	-4.19587
CARD8	0.204347	-2.47114e-16	1.88037	0.0623652	0.700082	-4.19668
FGF13	0.156655	3.22323e-17	1.88021	0.0623874	0.700082	-4.19695
RAB1B	0.273386	3.83206e-16	1.87959	0.0624721	0.700344	-4.19798
MTND6P2	0.203412	3.58136e-17	1.87948	0.0624876	0.700344	-4.19817
ADRB2	0.202879	5.37205e-17	1.87914	0.062535	0.700458	-4.19874
TTN	0.309599	1.61161e-16	1.87809	0.062679	0.700458	-4.20049
LPAR4	0.201571	-1.14604e-16	1.87781	0.0627183	0.700458	-4.20096
ERG	0.232463	0	1.87781	0.0627184	0.700458	-4.20096
AGPAT3	0.167307	-1.00278e-16	1.87768	0.0627355	0.700458	-4.20117
ACTG1P17	0.178032	2.72184e-16	1.87676	0.0628626	0.70052	-4.2027
MAFB	0.205133	8.95341e-17	1.8759	0.0629821	0.70052	-4.20414
GABBR1	0.30475	1.14604e-16	1.87589	0.0629836	0.70052	-4.20416
TTC21A	0.238128	1.11022e-16	1.87544	0.0630451	0.70052	-4.2049
ELMO1	0.227199	-1.39673e-16	1.87498	0.0631091	0.70052	-4.20567
SRGAP2D	0.328982	1.53999e-16	1.87462	0.0631588	0.70052	-4.20627
STARD9	0.159819	1.28929e-16	1.87454	0.0631704	0.70052	-4.20641
AADACL3	0.198979	-2.04138e-16	1.87426	0.0632097	0.70067	-4.20688
GAL3ST4	0.201023	-1.00278e-16	1.87354	0.0633099	0.701212	-4.20808
TOM1	0.293376	2.86509e-16	1.8722	0.0634955	0.701686	-4.2103
XIRP2-AS1	0.197805	1.88022e-16	1.87194	0.0635329	0.701686	-4.21074
GABRB2	0.203528	1.25348e-17	1.87156	0.0635857	0.701686	-4.21137
PTTG1IP	0.271359	6.08832e-17	1.87099	0.0636645	0.701686	-4.21231
RABAC1	0.12029	-7.16273e-16	1.87002	0.0638	0.702083	-4.21392
TRGV1	0.1601	-3.22323e-17	1.86975	0.063839	0.702167	-4.21439
IGLV1-47	0.289964	-1.00278e-16	1.8696	0.0638591	0.702167	-4.21462
THAP9-AS1	0.182519	-5.01391e-17	1.86868	0.0639878	0.703299	-4.21615
P4HA3	0.247549	3.58136e-18	1.8684	0.0640273	0.70345	-4.21662
NCF1C	0.22468	-1.21766e-16	1.86717	0.0642007	0.704327	-4.21866
GBP1P1	0.486922	-2.14882e-17	1.86692	0.0642361	0.704327	-4.21908
IGHV1-69-2	0.288513	2.86509e-17	1.86594	0.0643738	0.704554	-4.2207
SP6	0.179936	1.36092e-16	1.86563	0.0644171	0.704554	-4.22121
ACTN1-AS1	0.226341	-2.65021e-16	1.86555	0.0644287	0.704554	-4.22135
NOTCH3	0.204647	-8.95341e-17	1.86496	0.0645116	0.704554	-4.22232
RBM22P4	0.177551	2.68602e-17	1.86479	0.0645358	0.704554	-4.2226
RPS17P14	0.218893	1.43255e-16	1.86355	0.0647111	0.704554	-4.22466
ANKRD2	0.217892	-1.71906e-16	1.86293	0.0648001	0.704569	-4.2257
GRIA3	0.421325	-1.18185e-16	1.86067	0.0651211	0.706371	-4.22944
PXDN	0.187482	3.07997e-16	1.86003	0.0652117	0.706585	-4.23049
CD99	0.296528	7.37761e-16	1.85797	0.0655066	0.708021	-4.2339
STT3A-AS1	0.176964	4.29764e-17	1.85694	0.065654	0.708292	-4.2356
SASH3	0.189293	-2.43533e-16	1.85668	0.0656912	0.708292	-4.23603
ST7-AS2	0.182174	-2.07719e-16	1.85411	0.0660605	0.709914	-4.24027
SYDE1	0.201721	-8.59528e-17	1.85384	0.0660992	0.709914	-4.24071
KCNA3	0.2298	8.59528e-17	1.85377	0.0661101	0.709914	-4.24083
ARL2BPP4	0.208367	-1.02069e-16	1.85371	0.0661178	0.709914	-4.24092
CTRB1	0.159372	2.00556e-16	1.85349	0.0661498	0.709914	-4.24129
MRC2	0.231438	1.71906e-16	1.85288	0.0662376	0.710577	-4.24229
C1orf159	0.234689	-3.86787e-16	1.85223	0.0663315	0.711164	-4.24336
DIO3OS	0.161085	-2.22045e-16	1.85215	0.0663444	0.711164	-4.24351
COMMD4	0.250867	-1.36092e-16	1.85128	0.06647	0.711516	-4.24494
KRTAP6-2	0.190033	3.50974e-16	1.85094	0.0665192	0.711516	-4.24549
ETV1	0.457582	1.43255e-17	1.85036	0.0666031	0.711516	-4.24645
NXF3	0.201153	1.3251e-16	1.85032	0.0666082	0.711516	-4.2465
TRIM77	0.176097	-1.11022e-16	1.8503	0.0666118	0.711516	-4.24654
TBL1X	0.392059	-1.43255e-17	1.84946	0.0667331	0.711683	-4.24792
GPR50	0.190566	-1.41464e-16	1.84946	0.0667342	0.711683	-4.24793
LAIR1	0.255004	1.96975e-16	1.84911	0.0667844	0.711683	-4.2485
DNAH7	0.180552	-1.93394e-16	1.84896	0.066806	0.711683	-4.24874
B3GALNT1	0.243951	-6.80459e-17	1.84806	0.0669371	0.711683	-4.25022
MYOD1	0.163949	-2.07719e-16	1.84777	0.0669802	0.711683	-4.25071
TRAV39	0.16767	2.05928e-16	1.84776	0.0669811	0.711683	-4.25072
JRK	0.157784	-1.71906e-16	1.84776	0.0669811	0.711683	-4.25072
VDAC1P12	0.198317	-2.00556e-16	1.84719	0.0670637	0.711683	-4.25165
PABPC1L2B-AS1	0.188948	2.05928e-16	1.84691	0.067105	0.711683	-4.25212
RFPL4AP5	0.175297	1.43255e-17	1.84688	0.0671089	0.711683	-4.25216
GAS7	0.263157	-1.28929e-16	1.84686	0.0671123	0.711683	-4.2522
PPP1R2	0.208531	6.44646e-17	1.84596	0.067244	0.711683	-4.25368
PGM5P3-AS1	0.172747	-7.01947e-16	1.84566	0.067288	0.711683	-4.25417
ESM1	0.295208	-1.07441e-16	1.84502	0.0673821	0.711945	-4.25523
SMPD4P2	0.205873	2.65021e-16	1.84457	0.067448	0.71209	-4.25596
GNLY	0.184191	2.50696e-17	1.84408	0.0675196	0.712274	-4.25677
ANGEL1	0.185685	-1.36092e-16	1.84402	0.067529	0.712274	-4.25687
ARHGAP42P1	0.19035	-1.00278e-16	1.84344	0.0676136	0.712274	-4.25781
OR5H14	0.15356	1.79068e-18	1.84338	0.0676219	0.712274	-4.25791
IBSP	0.167273	6.08832e-17	1.84273	0.0677186	0.7126	-4.25899
CFL1P2	0.197609	3.22323e-17	1.84251	0.0677506	0.7126	-4.25934
HSPA12A	0.218307	1.53999e-16	1.84246	0.0677573	0.7126	-4.25942
NBPF12	0.159632	-5.01391e-17	1.84212	0.0678078	0.712643	-4.25998
TLE2	0.194714	1.93394e-16	1.84208	0.0678136	0.712643	-4.26004
PPP1R16B	0.177517	-3.29486e-16	1.84104	0.0679672	0.712732	-4.26175
CNN2P10	0.188619	3.68881e-16	1.84072	0.0680142	0.712732	-4.26227
SNORD114-1	0.215013	1.43255e-17	1.84061	0.0680309	0.712732	-4.26246
ZNF48	0.157142	-1.43255e-17	1.84036	0.0680667	0.712833	-4.26285
MTND1P2	0.179877	2.16673e-16	1.83959	0.0681808	0.713482	-4.26412
ZNF861P	0.209633	1.43255e-16	1.83761	0.0684742	0.715074	-4.26735
KRT16P2	0.138143	2.57858e-16	1.8376	0.0684762	0.715074	-4.26738
SEMA6A-AS1	0.174309	2.07719e-16	1.83721	0.0685346	0.715074	-4.26802
B3GNT6	0.21409	-2.11301e-16	1.83642	0.0686518	0.715332	-4.26931
TRNT1	0.220114	2.11301e-16	1.8363	0.0686699	0.715332	-4.26951
TPRX2P	0.188914	1.64743e-16	1.8356	0.0687739	0.715336	-4.27065
BDKRB1	0.27244	4.01113e-16	1.83505	0.0688557	0.715336	-4.27154
STARD8	0.165926	-2.65021e-16	1.83389	0.0690295	0.715778	-4.27344
CASKIN2	0.19935	-1.86231e-16	1.83322	0.0691289	0.716432	-4.27453
SNORD114-13	0.255465	6.44646e-17	1.83311	0.069145	0.716432	-4.2747
RBMS2	0.339061	-1.3251e-16	1.83222	0.069279	0.716731	-4.27616
CNN1	0.438678	-3.86787e-16	1.83152	0.069384	0.717369	-4.2773
UBDP1	0.188764	7.16273e-17	1.83103	0.0694577	0.717671	-4.2781
PSMD10P2	0.155849	1.07441e-16	1.83058	0.0695248	0.717671	-4.27883
IFNK	0.200383	-1.59371e-16	1.83057	0.0695275	0.717671	-4.27886
IGLC6	0.54652	4.1902e-16	1.82977	0.0696474	0.717934	-4.28015
PLTP	0.32327	-3.79625e-16	1.8297	0.0696582	0.717934	-4.28027
OR2I1P	0.206403	1.46836e-16	1.8287	0.0698091	0.718645	-4.2819
TNFSF4	0.209314	2.05928e-16	1.82837	0.0698588	0.718645	-4.28244
B3GNTL1P1	0.225206	-2.07719e-16	1.82793	0.069924	0.719046	-4.28314
TSPY2	0.136694	1.89812e-16	1.82644	0.0701505	0.719517	-4.28557
IGLL3P	0.144724	2.72184e-16	1.82634	0.0701654	0.719517	-4.28573
IGKV2D-10	0.17096	2.93672e-16	1.82631	0.0701698	0.719517	-4.28578
HMGB1P46	0.20635	-2.13091e-16	1.82624	0.0701807	0.719517	-4.2859
DYDC2	0.177756	-1.43255e-17	1.82575	0.0702545	0.719842	-4.28669
LMO3	0.328211	1.46836e-16	1.82536	0.0703136	0.719847	-4.28732
BBS1	0.186162	-1.07441e-17	1.82481	0.0703974	0.719847	-4.28822
HOXA3	0.17443	-3.43811e-16	1.82425	0.0704821	0.720443	-4.28912
GOLGA6L3	0.174572	-3.68881e-16	1.82267	0.0707228	0.721553	-4.29169
EEF1GP2	0.214407	-8.95341e-17	1.82083	0.0710053	0.723456	-4.29469
SUCLG2-AS1	0.30185	-3.36648e-16	1.82082	0.0710063	0.723456	-4.2947
ERC2-IT1	0.145874	-2.86509e-16	1.82065	0.0710326	0.723456	-4.29497
ZNF33CP	0.166982	-3.76043e-17	1.81999	0.0711336	0.723456	-4.29604
HCG23	0.215527	1.25348e-16	1.81984	0.0711563	0.723456	-4.29628
CLCN2	0.207373	1.89812e-16	1.81926	0.0712458	0.723456	-4.29723
TMEM38A	0.186406	-6.08832e-17	1.81918	0.0712567	0.723456	-4.29734
NACC2	0.191568	-1.53999e-16	1.81846	0.0713683	0.723542	-4.29852
MAOB	0.179389	3.1516e-16	1.81822	0.0714053	0.723648	-4.29891
HEG1	0.186412	-3.9395e-16	1.81776	0.0714754	0.723821	-4.29965
MAP9	0.202755	-9.13248e-17	1.81723	0.0715565	0.723894	-4.3005
KAT8	0.176362	-8.41621e-17	1.81684	0.0716178	0.723894	-4.30114
SLC38A7	0.199614	-5.01391e-17	1.81676	0.0716301	0.723894	-4.30127
CST5	0.16245	-1.86231e-16	1.81649	0.0716711	0.723894	-4.3017
GGT8P	0.152825	8.59528e-17	1.81506	0.0718925	0.725354	-4.30402
RASA4B	0.191589	3.04416e-16	1.8148	0.0719317	0.725482	-4.30443
ASB17	0.186969	-1.45045e-16	1.81363	0.0721139	0.726178	-4.30633
PROP1	0.201311	-1.79068e-16	1.81316	0.072187	0.726178	-4.30709
VPS9D1	0.195039	-1.64743e-16	1.81174	0.0724068	0.726357	-4.30937
ERVMER61-1	0.145397	1.64743e-16	1.81163	0.0724242	0.726357	-4.30956
MGAT1	0.173024	-2.39951e-16	1.81138	0.0724632	0.726357	-4.30996
MAGED4	0.206357	2.79346e-16	1.81086	0.0725441	0.726517	-4.3108
TUBB4BP6	0.161024	3.9395e-16	1.81052	0.0725978	0.726517	-4.31135
LMO7-AS1	0.347054	-1.77278e-16	1.81037	0.0726198	0.726517	-4.31158
ANO1	0.339307	2.79346e-16	1.80917	0.0728082	0.72696	-4.31353
ZNF890P	0.178557	-1.36092e-16	1.80904	0.0728283	0.72696	-4.31373
DNM1P33	0.196516	2.93672e-16	1.80823	0.0729552	0.727078	-4.31504
SLC41A2	0.270947	-3.58136e-18	1.80792	0.0730025	0.727078	-4.31553
BCL6	0.1708	2.93672e-16	1.80666	0.073201	0.727422	-4.31756
ASAP1-IT1	0.225335	-2.11301e-16	1.80502	0.0734585	0.728233	-4.3202
SARDH	0.160639	2.93672e-16	1.80487	0.0734818	0.728233	-4.32044
SNORD116-19	0.363987	-1.28929e-16	1.80435	0.0735648	0.728233	-4.32128
PDE4A	0.264949	2.39951e-16	1.80297	0.0737822	0.728463	-4.3235
PDE1A	0.211088	2.14882e-17	1.80256	0.0738468	0.728463	-4.32415
ZNF366	0.259481	1.11022e-16	1.80247	0.0738613	0.728463	-4.3243
NR2F2	0.385138	9.31155e-17	1.80154	0.0740086	0.728463	-4.32579
POLRMTP1	0.186836	4.33345e-16	1.80144	0.0740246	0.728463	-4.32596
MRPL2	0.215107	-2.86509e-16	1.80113	0.0740734	0.728463	-4.32645
HMGN1P13	0.174314	-2.11301e-16	1.80105	0.0740849	0.728463	-4.32657
AIRN	0.187892	-2.18463e-16	1.79936	0.074354	0.73022	-4.32928
PMFBP1	0.225871	1.28929e-16	1.79872	0.0744566	0.730388	-4.33032
IGLL5	0.656971	-1.00278e-16	1.79803	0.0745658	0.730765	-4.33142
TMEM158	0.182611	-1.36092e-16	1.79761	0.0746331	0.731048	-4.33209
POPDC2	0.174767	-1.25348e-16	1.79689	0.074748	0.731459	-4.33325
HK3	0.158382	4.29764e-16	1.79474	0.0750914	0.731994	-4.33668
ANKRD13A	0.257902	6.08832e-17	1.79439	0.0751475	0.731994	-4.33724
RASAL2-AS1	0.158261	1.18185e-16	1.79374	0.0752516	0.732009	-4.33828
EGFLAM-AS1	0.186856	5.73018e-17	1.79349	0.0752922	0.732009	-4.33868
KCNJ15	0.182756	-1.07441e-17	1.79302	0.075367	0.732011	-4.33942
ULK2	0.158624	2.75765e-16	1.79257	0.0754405	0.732243	-4.34015
TUT1	0.124139	1.36092e-16	1.79221	0.0754987	0.732243	-4.34073
CD247	0.18021	-2.00556e-16	1.79146	0.0756196	0.733151	-4.34193
UCN3	0.135047	-4.29764e-16	1.79053	0.0757693	0.733475	-4.34341
IGKV1D-12	0.253021	1.00278e-16	1.79024	0.0758156	0.733475	-4.34387
DBH-AS1	0.170461	3.1516e-16	1.78975	0.0758952	0.733475	-4.34465
ABHD6	0.226519	-1.79068e-16	1.78888	0.0760352	0.733475	-4.34603
HEATR5A	0.200155	2.00556e-16	1.78767	0.0762323	0.733475	-4.34797
C22orf31	0.184749	-1.46836e-16	1.7875	0.0762592	0.733475	-4.34823
IGKV1-27	0.336668	-2.6144e-16	1.78732	0.0762885	0.733475	-4.34852
IGLV3-21	0.225771	-2.22045e-16	1.78656	0.0764119	0.733475	-4.34973
ZNF132	0.200281	-1.79068e-16	1.78637	0.0764438	0.733475	-4.35004
PLEKHO2	0.240607	-4.1902e-16	1.78633	0.0764492	0.733475	-4.35009
KIF4CP	0.164478	-2.86509e-17	1.78625	0.0764632	0.733475	-4.35023
PTPRU	0.300572	-1.96975e-16	1.78619	0.0764732	0.733475	-4.35033
FLRT2	0.244789	3.76043e-17	1.78543	0.0765959	0.733475	-4.35153
CORO2B	0.23211	3.22323e-17	1.7849	0.0766828	0.733475	-4.35238
PLEKHD1	0.16872	1.28929e-16	1.78487	0.0766882	0.733475	-4.35243
CEP19	0.190038	-2.07719e-16	1.78452	0.0767445	0.733475	-4.35298
TTC28	0.252449	1.36092e-16	1.78451	0.0767458	0.733475	-4.35299
SOX4	0.237981	1.93394e-16	1.78444	0.0767572	0.733475	-4.3531
RPL32P35	0.208521	7.16273e-17	1.78401	0.076828	0.733475	-4.35379
PRELID3BP4	0.200167	-1.39673e-16	1.78398	0.0768327	0.733475	-4.35384
SLC9A7P1	0.202107	5.37205e-17	1.78293	0.0770039	0.733475	-4.3555
ARHGEF40	0.17399	3.9395e-16	1.78224	0.077117	0.733475	-4.3566
VIM-AS1	0.241126	6.80459e-17	1.78165	0.0772147	0.733475	-4.35754
CPEB2	0.253173	8.95341e-17	1.78055	0.0773943	0.733475	-4.35928
MS4A6E	0.19291	-1.41464e-16	1.78016	0.0774587	0.733475	-4.3599
RPGRIP1L	0.308824	-2.22045e-16	1.78012	0.0774649	0.733475	-4.35996
BSN	0.161832	2.79346e-16	1.77981	0.0775168	0.733475	-4.36046
SOCS2P1	0.203628	1.61161e-16	1.77939	0.0775857	0.733475	-4.36113
RARA	0.24855	6.08832e-17	1.77925	0.0776092	0.733475	-4.36135
PSKH1	0.185546	-5.73018e-17	1.77916	0.0776241	0.733475	-4.3615
SPSB1	0.154502	-4.01113e-16	1.77914	0.077627	0.733475	-4.36152
IGHV4-61	0.244921	-3.36648e-16	1.77901	0.0776488	0.733475	-4.36173
RAPGEF1	0.209297	2.68602e-16	1.77876	0.0776898	0.733475	-4.36213
IGHV1-46	0.218123	8.95341e-17	1.77859	0.0777168	0.733475	-4.36239
NGB	0.207976	8.95341e-17	1.77827	0.0777699	0.733475	-4.3629
SMG1P5	0.379429	3.11579e-16	1.7782	0.0777821	0.733475	-4.36301
CTSL	0.180916	-1.75487e-16	1.77809	0.0777995	0.733475	-4.36318
GOT2P5	0.184922	-1.93394e-16	1.77787	0.0778361	0.733475	-4.36353
PHBP9	0.143163	-3.86787e-16	1.77757	0.0778865	0.733475	-4.36402
CT45A5	0.171389	8.59528e-17	1.77735	0.0779216	0.733475	-4.36435
STARD4-AS1	0.188825	-6.08832e-17	1.77694	0.0779899	0.733475	-4.36501
RAB4B	0.145284	-2.07719e-16	1.77645	0.0780704	0.733475	-4.36578
TAS1R3	0.155047	3.58136e-18	1.77429	0.0784286	0.734294	-4.3692
RPL7P41	0.201706	3.04416e-17	1.77399	0.0784785	0.734294	-4.36967
ZNF831	0.180991	1.64743e-16	1.77318	0.0786136	0.734478	-4.37096
KRT17P1	0.179142	-2.54277e-16	1.77306	0.0786345	0.734478	-4.37115
NPAP1P3	0.192339	7.16273e-17	1.77257	0.0787148	0.734491	-4.37192
NTF6B	0.166819	-3.9395e-16	1.77239	0.0787449	0.734491	-4.3722
MAP4K1	0.176214	6.44646e-17	1.77149	0.0788957	0.734491	-4.37363
MYO16-AS2	0.161739	-3.58136e-18	1.77138	0.0789145	0.734491	-4.37381
SLC18A3	0.18329	6.08832e-17	1.77133	0.0789228	0.734491	-4.37389
CPVL	0.337318	7.16273e-18	1.77093	0.078989	0.734491	-4.37451
SERF1B	0.178372	-1.43255e-17	1.77079	0.0790125	0.734491	-4.37473
SERF1A	0.178372	-1.43255e-17	1.77079	0.0790125	0.734491	-4.37473
NPM1P49	0.156138	-2.22045e-16	1.76868	0.0793658	0.736397	-4.37806
SNRNP70	0.148114	-3.1516e-16	1.76854	0.0793895	0.736397	-4.37828
PGS1	0.175893	-1.71906e-16	1.7678	0.0795142	0.737146	-4.37945
TRGV10	0.161532	2.68602e-17	1.76645	0.0797413	0.738751	-4.38158
DUSP19	0.169504	6.26739e-17	1.76561	0.0798821	0.739515	-4.3829
TMEM175	0.184844	3.43811e-16	1.76532	0.0799313	0.739515	-4.38336
GCNT7	0.15786	-3.58136e-18	1.76482	0.0800153	0.739751	-4.38414
GABARAPL3	0.166878	2.86509e-17	1.7648	0.0800194	0.739751	-4.38418
TRMT112P4	0.176443	-1.86231e-16	1.76379	0.0801906	0.7404	-4.38577
VN1R107P	0.190019	-1.19976e-16	1.76274	0.0803684	0.741039	-4.38742
JAM3	0.299177	-1.79068e-16	1.76234	0.0804354	0.741237	-4.38804
GUSBP10	0.176942	-1.64743e-16	1.76213	0.0804713	0.741237	-4.38837
PARVA	0.245004	4.29764e-16	1.76129	0.0806141	0.742059	-4.3897
CDKL5	0.198734	1.93394e-16	1.76048	0.0807524	0.742584	-4.39097
THCAT158	0.192525	-1.68324e-16	1.76012	0.0808125	0.74278	-4.39153
TMEM135	0.260729	1.27138e-16	1.75971	0.0808832	0.74278	-4.39218
MT-TQ	0.254459	-5.44367e-16	1.75884	0.0810313	0.743136	-4.39354
CBX1P3	0.169333	-4.36926e-16	1.75775	0.0812167	0.744087	-4.39524
IL6ST	0.365834	-1.39673e-16	1.75593	0.0815285	0.745942	-4.3981
KCNC1	0.227887	1.89812e-16	1.75493	0.0817006	0.746853	-4.39967
PLCG2	0.249028	8.95341e-17	1.75438	0.0817947	0.746876	-4.40052
LATS2	0.216988	1.64743e-16	1.75303	0.0820273	0.7475	-4.40264
SHISA7	0.210177	3.58136e-18	1.75184	0.0822327	0.747542	-4.4045
WDFY3	0.173072	-3.90369e-16	1.75156	0.0822816	0.747542	-4.40494
RPS26P24	0.181957	-7.16273e-17	1.75106	0.0823681	0.747542	-4.40572
WBP1LP11	0.146182	8.95341e-17	1.75084	0.0824069	0.747542	-4.40607
IGLV2-23	0.198858	1.5758e-16	1.74992	0.0825651	0.748466	-4.4075
XAGE1B	0.198791	3.65299e-16	1.74849	0.082814	0.74859	-4.40973
HIVEP1	0.302041	-4.15438e-16	1.74834	0.0828394	0.74859	-4.40996
CBR3-AS1	0.149818	-1.71906e-16	1.74734	0.0830133	0.74859	-4.41152
DGKG	0.17598	-1.36092e-16	1.74708	0.0830593	0.74859	-4.41193
FAM78B	0.233114	1.79068e-16	1.7467	0.0831253	0.74859	-4.41252
VN1R87P	0.194746	8.95341e-17	1.74654	0.0831536	0.74859	-4.41278
ZNF135	0.209151	2.04138e-16	1.74633	0.0831894	0.74859	-4.4131
CROT	0.213534	1.95184e-16	1.74629	0.0831958	0.74859	-4.41315
XG	0.23804	6.08832e-17	1.74586	0.0832714	0.74859	-4.41383
EBF2	0.220937	2.14882e-16	1.74557	0.0833218	0.74859	-4.41428
PYHIN5P	0.223388	-1.18185e-16	1.74387	0.0836194	0.74859	-4.41693
LST1	0.326257	5.01391e-17	1.74379	0.0836329	0.74859	-4.41705
HAPLN4	0.190441	-1.93394e-16	1.74359	0.0836682	0.74859	-4.41736
ABCD1P2	0.145339	3.22323e-16	1.74339	0.0837032	0.74859	-4.41767
LRRC23	0.236729	1.43255e-16	1.74336	0.0837098	0.74859	-4.41773
KLHDC2	0.223947	1.68324e-16	1.7421	0.08393	0.748926	-4.41968
GYG1P1	0.154405	1.0386e-16	1.74168	0.0840035	0.749008	-4.42033
PENK	0.187602	-9.31155e-17	1.74075	0.0841671	0.749757	-4.42178
ELK2AP	0.221806	-3.07997e-16	1.74074	0.0841699	0.749757	-4.4218
KRTDAP	0.207445	-2.04138e-16	1.73984	0.0843285	0.749835	-4.4232
PLXND1	0.298645	8.95341e-17	1.73919	0.0844421	0.749835	-4.4242
SNORD114-15	0.164821	-9.66968e-17	1.73907	0.0844644	0.749835	-4.42439
FCHO2	0.216351	1.23557e-16	1.73897	0.0844807	0.749835	-4.42454
GMIP	0.222522	-1.43255e-16	1.73841	0.0845801	0.750403	-4.42541
FTLP2	0.307185	-2.86509e-17	1.73826	0.0846072	0.750403	-4.42565
MSRB1P1	0.221065	8.23714e-17	1.73799	0.0846554	0.750403	-4.42607
ADGB	0.152743	3.76043e-17	1.73792	0.0846663	0.750403	-4.42617
MTND4P18	0.199053	-1.75487e-16	1.73783	0.0846822	0.750403	-4.4263
ADGRL2	0.213928	-1.00278e-16	1.73741	0.0847579	0.750587	-4.42697
ABHD17AP9	0.189968	9.31155e-17	1.73672	0.0848789	0.750906	-4.42803
KCNJ1	0.150797	6.44646e-17	1.73645	0.0849282	0.750906	-4.42846
IGHVII-33-1	0.177018	1.93394e-16	1.73629	0.0849562	0.750906	-4.4287
TMEM59L	0.133831	-2.79346e-16	1.73598	0.0850101	0.750906	-4.42917
ODF3B	0.17347	4.29764e-16	1.73577	0.0850472	0.750906	-4.4295
DPEP1	0.202295	5.01391e-17	1.73552	0.0850921	0.750906	-4.42989
NACAD	0.198125	7.16273e-18	1.73501	0.0851837	0.750906	-4.43069
PCCA	0.211793	-1.0386e-16	1.73495	0.0851936	0.750906	-4.43077
SSMEM1	0.176107	-1.53999e-16	1.73371	0.0854151	0.750906	-4.4327
OSBPL8	0.299555	-2.14882e-16	1.73333	0.0854826	0.750906	-4.43328
HUS1B	0.210409	-6.08832e-17	1.73314	0.0855161	0.750906	-4.43357
RPL36AP33	0.25738	-4.33345e-16	1.73303	0.0855353	0.750906	-4.43374
TDGF1P1	0.158139	-2.00556e-16	1.73273	0.0855897	0.750906	-4.43421
CREB3L2	0.263688	2.32789e-16	1.7325	0.0856308	0.750906	-4.43457
ZNF546	0.202367	-1.43255e-16	1.7321	0.0857016	0.750906	-4.43518
CSRP2	0.316909	3.00835e-16	1.73167	0.0857784	0.751097	-4.43585
SHANK2-AS2	0.177694	1.96975e-16	1.73097	0.0859048	0.751498	-4.43694
CPNE5	0.21295	7.16273e-17	1.73027	0.0860286	0.751498	-4.438
ANKRD44-IT1	0.165815	5.01391e-17	1.73026	0.086032	0.751498	-4.43803
RAB1C	0.168272	-2.14882e-16	1.73011	0.086058	0.751498	-4.43826
KLF8	0.21304	-2.68602e-16	1.72977	0.0861196	0.751498	-4.43879
HSFY5P	0.181433	-2.02347e-16	1.72973	0.0861269	0.751498	-4.43885
AK4P3	0.156794	-4.29764e-17	1.72928	0.0862076	0.751556	-4.43955
RSU1P3	0.251348	3.25904e-16	1.72926	0.086211	0.751556	-4.43957
PCNPP2	0.130669	-4.40508e-16	1.72917	0.086226	0.751556	-4.4397
CLDN16	0.179917	1.39673e-16	1.72857	0.0863348	0.751694	-4.44064
C20orf181	0.145638	3.58136e-16	1.72853	0.0863421	0.751694	-4.4407
SSU72P4	0.214277	-1.95184e-16	1.72834	0.0863766	0.751755	-4.441
TRBV5-3	0.161735	1.5758e-16	1.72774	0.0864839	0.751976	-4.44192
ATL1	0.13348	1.43255e-17	1.72737	0.0865506	0.751976	-4.44249
SPDYE16	0.122206	1.28929e-16	1.72676	0.0866604	0.751976	-4.44343
PHACTR3	0.16088	-4.08276e-16	1.72653	0.0867015	0.751976	-4.44378
KCTD9P6	0.178449	-3.58136e-18	1.72608	0.0867841	0.751976	-4.44448
CRTC3	0.239049	3.36648e-16	1.72578	0.0868382	0.751976	-4.44495
SNRPEP8	0.191735	-5.37205e-17	1.72576	0.0868411	0.751976	-4.44497
ELOVL4	0.161061	9.31155e-17	1.72546	0.086895	0.75216	-4.44543
COTL1	0.195894	-2.50696e-16	1.72518	0.0869467	0.75216	-4.44587
DENND5A	0.224876	-5.01391e-17	1.72479	0.0870164	0.752287	-4.44646
ULK4P1	0.233767	3.58136e-16	1.72411	0.0871399	0.752665	-4.44751
GIMAP4	0.22006	-8.95341e-17	1.72349	0.0872518	0.752665	-4.44846
TMEM72	0.148995	2.00556e-16	1.72325	0.0872959	0.752665	-4.44884
TRMT1	0.222533	-4.01113e-16	1.72293	0.0873532	0.752665	-4.44932
PHF21A	0.285967	2.86509e-16	1.72283	0.0873718	0.752665	-4.44948
CD59	0.365852	1.39673e-16	1.72271	0.0873936	0.752665	-4.44967
ZNF134	0.17368	-5.37205e-16	1.72264	0.0874057	0.752665	-4.44977
CYP2G1P	0.154743	4.29764e-17	1.72243	0.0874439	0.752665	-4.45009
HMGB1P4	0.168187	-2.18463e-16	1.72207	0.0875096	0.752665	-4.45065
TLN1	0.197101	1.79068e-17	1.72203	0.087517	0.752665	-4.45071
CATSPERB	0.211633	2.82928e-16	1.72197	0.0875287	0.752665	-4.45081
NBPF3	0.141397	-3.33067e-16	1.72015	0.0878588	0.754511	-4.4536
TOR1AIP1	0.329674	-8.23714e-17	1.71959	0.0879606	0.754654	-4.45445
RNF166	0.145192	3.9395e-16	1.71948	0.0879823	0.754654	-4.45464
TACR2	0.229273	8.23714e-17	1.71918	0.0880354	0.754654	-4.45508
POU2F2	0.255886	2.65021e-16	1.71895	0.0880774	0.754698	-4.45543
CCR4	0.297673	-2.11301e-16	1.71806	0.0882417	0.754974	-4.45681
PHC2	0.25702	1.00278e-16	1.71674	0.0884831	0.755527	-4.45883
SOBP	0.347104	1.28929e-16	1.71536	0.0887359	0.755527	-4.46094
TDP1	0.135676	-1.86231e-16	1.71515	0.0887741	0.755527	-4.46126
THRB-AS1	0.183171	-2.04138e-16	1.71488	0.0888252	0.755527	-4.46169
ASPG	0.151516	-1.71906e-16	1.71476	0.088846	0.755527	-4.46186
CDH23	0.220783	-2.86509e-16	1.7144	0.0889132	0.755527	-4.46242
HMGB3P14	0.185276	-3.4023e-17	1.71339	0.0890983	0.756079	-4.46396
LCN6	0.174364	8.95341e-17	1.71286	0.0891968	0.756079	-4.46477
URB2	0.142937	7.16273e-18	1.7124	0.0892816	0.756079	-4.46548
BRPF1	0.188085	1.28929e-16	1.71235	0.0892903	0.756079	-4.46555
YIPF3	0.323486	-2.11301e-16	1.71102	0.0895371	0.75623	-4.46759
EMX2	0.166291	1.79068e-16	1.71033	0.089665	0.756523	-4.46864
PAM	0.354996	-2.04138e-16	1.70864	0.0899797	0.757984	-4.47123
STEAP2-AS1	0.19476	-1.39673e-16	1.70721	0.0902446	0.759279	-4.4734
CXCL12	0.36684	-2.29207e-16	1.70674	0.090332	0.75978	-4.47411
WWC1	0.138255	1.07441e-16	1.70619	0.0904361	0.759991	-4.47496
BMP8B	0.18442	5.01391e-17	1.70612	0.0904493	0.759991	-4.47507
TMPRSS5	0.178067	-7.879e-17	1.70587	0.0904949	0.759991	-4.47544
TIMM17BP1	0.165767	-7.16273e-17	1.7046	0.0907326	0.760894	-4.47738
OR52P1P	0.173655	2.0951e-16	1.70454	0.0907431	0.760894	-4.47747
BEX1	0.176756	2.90091e-16	1.70407	0.0908323	0.761174	-4.47819
CST2	0.334671	-2.72184e-16	1.70376	0.0908891	0.761279	-4.47865
SYNM	0.180789	-6.44646e-17	1.70359	0.090921	0.761279	-4.47891
PGAM1P1	0.169107	5.73018e-17	1.70352	0.0909353	0.761279	-4.47903
AGPAT4-IT1	0.202149	-2.6144e-16	1.70281	0.0910687	0.761279	-4.48011
EARS2	0.181901	1.00278e-16	1.70251	0.0911254	0.761279	-4.48057
ARL2BPP10	0.182171	-5.37205e-17	1.70239	0.0911463	0.761279	-4.48074
EIF3KP1	0.177557	1.61161e-16	1.70212	0.0911985	0.761279	-4.48116
SPDYE6	0.144271	-8.59528e-17	1.70207	0.0912074	0.761279	-4.48123
SEZ6L	0.165327	3.1516e-16	1.70153	0.0913084	0.761889	-4.48205
ADAMTS9-AS1	0.18457	3.9395e-17	1.70091	0.0914262	0.76234	-4.483
RNF11	0.257339	-1.28929e-16	1.70062	0.09148	0.76234	-4.48343
DMXL2	0.297352	9.31155e-17	1.70043	0.091516	0.76234	-4.48372
LRRC8C	0.25639	3.72462e-16	1.70022	0.0915564	0.76234	-4.48405
CERK	0.183044	1.43255e-17	1.6998	0.0916357	0.762523	-4.48469
PPM1M	0.204642	5.37205e-18	1.69895	0.0917961	0.763161	-4.48598
PLXNA1	0.152935	3.18741e-16	1.69895	0.0917962	0.763161	-4.48598
LIMS2	0.251421	1.79068e-17	1.69726	0.0921156	0.764047	-4.48854
AP1M1	0.200792	-2.57858e-16	1.6956	0.0924295	0.764047	-4.49104
C11orf68	0.197777	2.68602e-16	1.69537	0.0924748	0.764047	-4.49141
ACTR3BP5	0.144938	-3.50974e-16	1.69516	0.0925131	0.764047	-4.49171
ELFN1	0.20862	-1.96975e-16	1.69409	0.0927184	0.764047	-4.49334
CREBBP	0.181143	3.58136e-17	1.69383	0.0927679	0.764047	-4.49374
CUBNP2	0.174272	1.18185e-16	1.69357	0.0928174	0.764047	-4.49413
RABEP2	0.130424	-2.07719e-16	1.69339	0.0928516	0.764047	-4.4944
TLR10	0.201533	1.0565e-16	1.69295	0.0929348	0.764047	-4.49506
MAGED4B	0.163719	2.86509e-17	1.69288	0.0929486	0.764047	-4.49517
NBEAP1	0.370452	-3.58136e-17	1.6928	0.0929644	0.764047	-4.49529
HPCAL4	0.162046	4.15438e-16	1.69202	0.0931119	0.764783	-4.49646
LPP	0.323928	3.86787e-16	1.69132	0.0932471	0.765175	-4.49753
CPA4	0.170412	-1.8265e-16	1.69119	0.093272	0.765175	-4.49773
ARID5A	0.167868	3.86787e-16	1.69034	0.093435	0.765175	-4.49901
ADAM19	0.186139	-2.50696e-16	1.69005	0.0934899	0.765175	-4.49945
IRF4	0.179385	-2.3637e-16	1.68902	0.093688	0.7656	-4.501
SPIN3	0.204774	-2.18463e-16	1.68886	0.0937181	0.765616	-4.50124
EML3	0.154032	-3.22323e-16	1.68859	0.0937708	0.765818	-4.50165
CICP4	0.167358	2.57858e-16	1.68835	0.0938164	0.765882	-4.50201
UBE2Q2P12	0.226039	1.21766e-16	1.68826	0.0938347	0.765882	-4.50215
MT1IP	0.252369	4.65577e-17	1.68756	0.0939695	0.766295	-4.50321
DNM1P46	0.153331	-2.50696e-17	1.68674	0.0941275	0.766896	-4.50445
IGKV1D-16	0.278841	8.95341e-17	1.68586	0.0942971	0.767591	-4.50577
CD83	0.21318	-2.14882e-17	1.68457	0.0945458	0.768568	-4.50771
GS1-24F4.2	0.128195	8.41621e-17	1.68457	0.0945466	0.768568	-4.50771
GUCY2F	0.167266	8.23714e-17	1.68445	0.0945687	0.768568	-4.50789
BNIP3P16	0.174642	8.41621e-17	1.68396	0.0946639	0.768568	-4.50863
SUB1P2	0.176022	-1.25348e-16	1.6838	0.0946942	0.768568	-4.50886
OSBP2	0.258398	-1.0386e-16	1.68369	0.0947163	0.768568	-4.50903
CKAP4	0.167912	-2.07719e-16	1.68334	0.0947841	0.768568	-4.50956
RBMY1KP	0.187336	1.55789e-16	1.68239	0.0949687	0.768937	-4.51099
NPRL3	0.152003	5.73018e-17	1.68239	0.0949694	0.768937	-4.511
CLIP4	0.211118	-5.73018e-17	1.68206	0.0950328	0.769063	-4.51149
CTIF	0.169021	2.75765e-16	1.68156	0.0951299	0.769063	-4.51224
IL17REL	0.15936	-4.15438e-16	1.68154	0.0951333	0.769063	-4.51226
PCDH8P1	0.177284	4.65577e-17	1.68135	0.095171	0.769063	-4.51255
SCPEP1	0.163592	4.29764e-17	1.68129	0.0951822	0.769063	-4.51264
IGKV1OR9-1	0.374029	2.6144e-16	1.68115	0.0952106	0.769064	-4.51286
NPM1P29	0.160249	-8.23714e-17	1.68059	0.09532	0.769064	-4.5137
ZNF259P1	0.17606	-1.55789e-16	1.68055	0.0953262	0.769064	-4.51375
EFHD1	0.139712	1.14604e-16	1.68022	0.0953913	0.76916	-4.51425
SARS2	0.133928	8.59528e-17	1.67924	0.095582	0.769323	-4.51572
ENTPD1-AS1	0.183697	-1.91603e-16	1.67906	0.0956171	0.769323	-4.51599
NAGA	0.205619	-1.89812e-16	1.67882	0.0956652	0.769323	-4.51636
GRP	0.225364	-2.93672e-16	1.67814	0.0957966	0.76972	-4.51737
DENND4B	0.217567	4.22601e-16	1.67796	0.095832	0.76972	-4.51764
NDUFS3	0.126365	-2.50696e-16	1.67792	0.0958408	0.76972	-4.51771
IGKV1-37	0.246183	-1.79068e-16	1.67521	0.0963725	0.771766	-4.52177
TEAD3	0.166075	-1.86231e-16	1.67506	0.0964008	0.771766	-4.52198
SYT4	0.190961	-5.19298e-17	1.67496	0.0964213	0.771766	-4.52214
NEK4P1	0.155818	7.52087e-17	1.67433	0.0965448	0.771785	-4.52308
CCDC17	0.149151	1.5758e-16	1.67403	0.0966042	0.771802	-4.52353
RPL3L	0.190097	1.86231e-16	1.67371	0.0966673	0.771802	-4.52401
NIFK-AS1	0.188788	-5.01391e-17	1.67245	0.096916	0.772104	-4.5259
ZNF554	0.165245	2.22045e-16	1.67203	0.0969993	0.772542	-4.52653
HIF1A-AS2	0.225947	1.25348e-16	1.67151	0.0971013	0.772903	-4.5273
ALK	0.169328	-1.21766e-16	1.67111	0.0971801	0.773305	-4.52789
CMTM7	0.23578	-6.44646e-17	1.67078	0.0972461	0.77351	-4.52839
ZNF205	0.157053	-2.72184e-16	1.67009	0.0973834	0.77351	-4.52943
RMND5B	0.140236	1.5758e-16	1.66954	0.0974915	0.77351	-4.53024
ADAMTS7	0.228474	1.00278e-16	1.66947	0.0975068	0.77351	-4.53035
ADAM20P3	0.212186	-4.26182e-16	1.66941	0.0975175	0.77351	-4.53044
TBC1D10C	0.168639	4.15438e-16	1.66919	0.097562	0.773639	-4.53077
SNORD114-23	0.158749	5.90925e-17	1.66873	0.0976535	0.774139	-4.53146
PPP1R12B	0.397467	-2.14882e-17	1.66777	0.0978433	0.774345	-4.53288
DLG2	0.209793	1.88022e-16	1.66701	0.0979955	0.774345	-4.53402
GPR55	0.152608	-1.8265e-16	1.66671	0.0980542	0.774345	-4.53446
LIAS	0.221699	1.71906e-16	1.6662	0.0981573	0.774368	-4.53523
STX8	0.314766	1.43255e-16	1.66588	0.0982212	0.774368	-4.53571
BTF3L4P4	0.152205	-9.13248e-17	1.66248	0.0989019	0.776818	-4.54077
EAF2	0.228386	1.3251e-16	1.66204	0.09899	0.776909	-4.54142
DPPA3P3	0.156193	4.83484e-17	1.66199	0.0989988	0.776909	-4.54149
MRAS	0.306367	-2.14882e-17	1.66178	0.0990415	0.77702	-4.5418
CATIP-AS1	0.202062	-3.07997e-16	1.66137	0.099124	0.777444	-4.54241
GAGE2D	0.259938	1.79068e-16	1.66106	0.099187	0.777701	-4.54288
SMCP	0.15687	-1.11022e-16	1.66017	0.0993668	0.777948	-4.5442
SMIM12P1	0.150145	-2.07719e-16	1.65989	0.0994221	0.777948	-4.54461
IGKV1OR2-2	0.154254	3.58136e-17	1.65907	0.0995872	0.777996	-4.54582
KDM6B	0.143873	-5.01391e-17	1.65873	0.099656	0.777996	-4.54633
RYR2	0.235787	1.79068e-16	1.65862	0.0996788	0.777996	-4.5465
FNTB	0.238032	-1.93394e-16	1.65825	0.0997533	0.778218	-4.54704
ENAH	0.276757	2.3637e-16	1.65743	0.0999191	0.778242	-4.54826
TMEFF1	0.206089	-3.58136e-18	1.65741	0.0999234	0.778242	-4.54829
CD70	0.222406	-4.11857e-16	1.65734	0.0999383	0.778242	-4.5484
TCIRG1	0.285645	-5.73018e-17	1.65708	0.09999	0.778352	-4.54878
CCS	0.168374	2.50696e-17	1.65671	0.100065	0.778352	-4.54933
SELP	0.189901	8.23714e-17	1.65669	0.10007	0.778352	-4.54936
TTC3-AS1	0.174296	2.50696e-17	1.65668	0.100071	0.778352	-4.54937
ELK3	0.188182	-2.11301e-16	1.65656	0.100095	0.778352	-4.54955
ZNF570	0.207324	-1.46836e-16	1.65591	0.100228	0.778944	-4.55052
PLAC9	0.189894	1.71906e-16	1.65408	0.100599	0.78123	-4.55322
DBN1	0.227716	1.75487e-16	1.6539	0.100637	0.78123	-4.5535
BLOC1S4	0.181866	3.61718e-16	1.65337	0.100743	0.781394	-4.55427
PUDPP3	0.133215	-2.3637e-16	1.65303	0.100813	0.781394	-4.55478
CD300A	0.261759	-2.79346e-16	1.65272	0.100877	0.781394	-4.55524
GTF2F2P2	0.188453	-1.07441e-17	1.65187	0.10105	0.781394	-4.55649
DGKB	0.192779	-4.83484e-17	1.65179	0.101066	0.781394	-4.55661
CALCOCO1	0.322142	4.15438e-16	1.65172	0.101081	0.781394	-4.55671
EGFL7	0.152467	-3.9395e-16	1.65126	0.101175	0.781854	-4.5574
IGBP1P5	0.185189	-1.55789e-16	1.65064	0.101302	0.782116	-4.55831
RPL17P19	0.147735	9.66968e-17	1.6504	0.101351	0.782116	-4.55866
NLRC4	0.199212	1.11022e-16	1.65011	0.10141	0.782138	-4.55909
IL1RAP	0.230385	-3.9395e-17	1.64981	0.101471	0.782138	-4.55953
RGS2	0.438656	-2.00556e-16	1.64928	0.101579	0.782138	-4.56031
TSC22D3	0.248414	-2.57858e-16	1.64889	0.101661	0.782138	-4.56089
ZNF185	0.236313	-1.61161e-16	1.64871	0.101697	0.782138	-4.56115
UBE2Q2L	0.199319	-4.29764e-17	1.64827	0.101788	0.782138	-4.56181
ARPP19	0.209887	6.08832e-17	1.64797	0.10185	0.782138	-4.56225
CCDC102A	0.16908	6.44646e-17	1.64769	0.101908	0.782138	-4.56267
OR52E7P	0.162005	-4.29764e-17	1.64752	0.101942	0.782138	-4.56291
ISYNA1	0.191051	-2.43533e-16	1.64654	0.102144	0.782138	-4.56436
PCAT1	0.154292	-1.75487e-16	1.64647	0.102159	0.782138	-4.56446
CYB5R3	0.207668	2.79346e-16	1.64629	0.102195	0.782138	-4.56472
FPR3	0.396529	1.86231e-16	1.64521	0.102417	0.783317	-4.56631
GJA8	0.178686	9.13248e-17	1.64511	0.102438	0.783317	-4.56646
PLXDC1	0.26559	1.86231e-16	1.64415	0.102636	0.783605	-4.56787
MYO1E	0.295136	-2.57858e-16	1.64298	0.102879	0.783705	-4.56959
IGHV3OR16-11	0.284903	2.50696e-16	1.64273	0.10293	0.783879	-4.56996
ANGPTL7	0.181362	-3.11579e-16	1.64233	0.103014	0.784146	-4.57055
IQSEC2	0.136607	4.15438e-16	1.64216	0.103049	0.784146	-4.5708
IGKV1OR2-3	0.170424	-1.46836e-16	1.64215	0.103052	0.784146	-4.57082
ESRRAP2	0.195603	-4.47671e-17	1.64089	0.103313	0.78516	-4.57266
ZNF285B	0.128822	2.14882e-17	1.64088	0.103315	0.78516	-4.57268
ATP6V1G1P6	0.162108	-2.04138e-16	1.6408	0.103332	0.78516	-4.5728
CAB39P1	0.18769	-1.73696e-16	1.64068	0.103357	0.78516	-4.57298
TMEM156	0.205268	8.77434e-17	1.64031	0.103433	0.785296	-4.57351
MORF4L1P4	0.153881	-2.14882e-16	1.63973	0.103555	0.785351	-4.57437
LAMB1	0.352649	-3.61718e-16	1.63915	0.103676	0.785586	-4.57522
SPIN1	0.250506	-3.36648e-16	1.63895	0.103717	0.785586	-4.57551
IDUA	0.177744	3.58136e-18	1.63886	0.103735	0.785586	-4.57564
FAM197Y9	0.157309	1.79068e-16	1.63871	0.103767	0.785586	-4.57586
EVC2	0.202427	-1.39673e-16	1.63841	0.10383	0.785586	-4.57631
IGHV7-40	0.14659	1.8265e-16	1.63829	0.103855	0.785586	-4.57648
PARP11	0.192838	-6.80459e-17	1.63828	0.103856	0.785586	-4.57649
NPTX1	0.166769	-4.26182e-16	1.63759	0.104001	0.785592	-4.5775
TRAJ33	0.147138	1.79068e-16	1.63737	0.104047	0.785592	-4.57783
ZNF649-AS1	0.152934	6.44646e-17	1.63691	0.104143	0.785684	-4.5785
CRYAB	0.323163	2.54277e-16	1.63677	0.104173	0.785684	-4.57871
GPR25	0.143362	6.08832e-17	1.63562	0.104414	0.78575	-4.58039
OR4N3P	0.176749	1.39673e-16	1.63542	0.104456	0.78575	-4.58069
ENPP7P9	0.152931	-4.22601e-16	1.63534	0.104473	0.78575	-4.5808
ZNF354B	0.191832	1.43255e-16	1.63482	0.104582	0.785848	-4.58157
MGAT2P1	0.208167	1.21766e-16	1.63475	0.104597	0.785848	-4.58167
RPL27P12	0.152251	-1.07441e-16	1.6346	0.104628	0.785848	-4.58189
TSSK4	0.137993	-1.43255e-16	1.63348	0.104864	0.786013	-4.58353
PMM2P1	0.1621	1.86231e-16	1.63347	0.104866	0.786013	-4.58354
SNORD33	0.16594	1.19976e-16	1.63328	0.104906	0.786013	-4.58382
ART4	0.158238	3.22323e-17	1.63322	0.104919	0.786013	-4.58391
ARL8A	0.223205	-3.29486e-16	1.63273	0.105022	0.786013	-4.58463
SVIL-AS1	0.400846	-7.16273e-17	1.63261	0.105047	0.786013	-4.5848
PDGFRB	0.234367	1.53999e-16	1.63238	0.105094	0.786106	-4.58513
CNTROB	0.160749	-7.16273e-18	1.63194	0.105188	0.786372	-4.58577
RPL23AP62	0.182311	-2.14882e-17	1.63124	0.105336	0.786948	-4.5868
GIPC1	0.134717	2.00556e-16	1.63075	0.105439	0.786948	-4.58751
ADAMTS4	0.193065	-1.73696e-16	1.63039	0.105516	0.786948	-4.58804
MCL1	0.237788	3.68881e-16	1.63035	0.105524	0.786948	-4.5881
BOC	0.200062	1.89812e-16	1.62966	0.105669	0.787169	-4.5891
SYCP2L	0.16857	-6.98366e-17	1.62828	0.105962	0.787208	-4.59112
STAB2	0.163861	-5.73018e-17	1.62784	0.106056	0.787208	-4.59175
PPEF2	0.174872	-1.37883e-16	1.62774	0.106078	0.787208	-4.59191
KCTD10	0.197484	2.22045e-16	1.62673	0.106292	0.788038	-4.59337
SLC9B1P3	0.178305	-9.84875e-17	1.62645	0.106352	0.788038	-4.59379
SHC1P1	0.179705	1.28929e-16	1.62544	0.106565	0.788055	-4.59524
GPC5-IT1	0.189861	4.29764e-17	1.62445	0.106778	0.788065	-4.5967
DNAJC19P5	0.179898	1.43255e-17	1.62428	0.106814	0.788065	-4.59694
CYP4A44P	0.179757	1.3072e-16	1.62407	0.106859	0.788065	-4.59725
ZNF734P	0.144668	-7.52087e-17	1.62373	0.106931	0.788065	-4.59773
ASPA	0.217887	2.16673e-16	1.62358	0.106963	0.788065	-4.59795
PDK2	0.229294	-7.52087e-17	1.62351	0.106979	0.788065	-4.59806
GLYCTK-AS1	0.162297	1.75487e-16	1.62339	0.107004	0.788065	-4.59823
TPST1	0.1556	-8.59528e-17	1.62269	0.107153	0.788065	-4.59925
FMO4	0.181998	-2.22045e-16	1.62234	0.107229	0.788065	-4.59976
BLOC1S2	0.182167	3.58136e-17	1.62195	0.107312	0.788065	-4.60032
FAM90A24P	0.150248	-3.58136e-18	1.6218	0.107346	0.788065	-4.60055
DTNBP1	0.192142	-1.89812e-16	1.62173	0.10736	0.788065	-4.60065
CREM	0.29518	1.80859e-16	1.62169	0.107369	0.788065	-4.6007
BACH1-IT2	0.167347	-3.9395e-16	1.62148	0.107414	0.788065	-4.60101
GPR135	0.148112	1.39673e-16	1.62143	0.107424	0.788065	-4.60108
TRAV15	0.168344	1.93394e-16	1.62125	0.107463	0.788065	-4.60135
SLC9B1P4	0.135685	2.00556e-16	1.62082	0.107554	0.788309	-4.60196
PSTPIP2	0.203119	-1.16394e-16	1.61977	0.10778	0.788354	-4.60348
ERV3-1	0.378619	2.50696e-16	1.61955	0.107829	0.788354	-4.60381
CELF3	0.170515	1.50417e-16	1.61913	0.107918	0.788354	-4.60441
CNN3P1	0.165676	2.14882e-17	1.6184	0.108077	0.788354	-4.60548
ATP13A4-AS1	0.160722	-1.14604e-16	1.61833	0.10809	0.788354	-4.60557
RHOQ	0.320265	-4.65577e-17	1.61789	0.108187	0.788354	-4.60622
IGKV1-35	0.196222	8.23714e-17	1.61787	0.10819	0.788354	-4.60624
CBX6	0.194674	-1.5758e-16	1.61773	0.10822	0.788354	-4.60644
C9orf92	0.179501	-2.00556e-16	1.61764	0.108239	0.788354	-4.60657
MED9	0.15734	-6.44646e-17	1.61757	0.108255	0.788354	-4.60668
BNIP3	0.228493	4.08276e-16	1.61744	0.108282	0.788354	-4.60686
OR51A10P	0.174639	-7.69993e-17	1.61598	0.108598	0.789783	-4.60898
SNRPFP3	0.219091	-2.22045e-16	1.61587	0.108623	0.789783	-4.60914
CCDC7	0.188624	8.59528e-17	1.61559	0.108682	0.78979	-4.60954
ADGRL4	0.282698	0	1.61497	0.108818	0.790156	-4.61045
DAPK3	0.14689	-7.16273e-18	1.61492	0.108829	0.790156	-4.61052
SAMD9	0.31387	1.07441e-17	1.61479	0.108856	0.790156	-4.6107
EFHC2	0.200943	1.02069e-16	1.61375	0.109083	0.790852	-4.61221
LHPP	0.220926	-5.01391e-17	1.61331	0.109178	0.790852	-4.61284
IGHV3-33-2	0.126603	-2.29207e-16	1.61322	0.109198	0.790852	-4.61298
CDC42BPB	0.258791	-3.58136e-18	1.61314	0.109216	0.790852	-4.61309
SUN2	0.140082	1.43255e-17	1.61312	0.109219	0.790852	-4.61311
HMGN1P15	0.158397	-2.50696e-17	1.61264	0.109323	0.790852	-4.6138
SMIM7	0.120344	-5.30042e-16	1.61219	0.109421	0.790852	-4.61445
MTCO2P9	0.180044	2.18463e-16	1.61197	0.109469	0.790852	-4.61477
EIF2B3	0.296998	1.36092e-16	1.61135	0.109604	0.791052	-4.61567
SPANXA1	0.139567	-2.3637e-16	1.61025	0.109844	0.791363	-4.61725
KCNN3	0.197975	1.50417e-16	1.61024	0.109848	0.791363	-4.61728
MT2A	0.367322	-5.58693e-16	1.60951	0.110006	0.791363	-4.61832
SMOC1	0.242704	2.29207e-16	1.60935	0.110041	0.791363	-4.61856
CELF2	0.200994	-3.9395e-17	1.60818	0.110298	0.791363	-4.62025
TERF1P3	0.152287	-3.22323e-16	1.6081	0.110316	0.791363	-4.62036
C5AR1	0.290301	-7.16273e-18	1.60779	0.110384	0.791363	-4.62081
KRT38	0.166396	-5.73018e-17	1.60756	0.110433	0.791363	-4.62113
FER1L6-AS2	0.164622	-2.14882e-16	1.60745	0.110457	0.791363	-4.62129
INHBB	0.161756	5.01391e-17	1.60741	0.110467	0.791363	-4.62136
NFU1P2	0.163153	1.25348e-16	1.60728	0.110495	0.791363	-4.62154
CYP2D8P	0.208966	-1.28929e-16	1.60715	0.110523	0.791363	-4.62172
POLK	0.334939	0	1.60675	0.110612	0.791363	-4.6223
SLC29A4P1	0.138357	-4.15438e-16	1.60672	0.110617	0.791363	-4.62234
RPL23AP87	0.151592	2.14882e-17	1.60643	0.110683	0.791363	-4.62277
SPP1	0.764061	-3.29486e-16	1.60611	0.110751	0.791363	-4.62322
MYH9	0.269868	-1.79068e-17	1.6058	0.110821	0.791363	-4.62367
ZNF747	0.151495	4.01113e-16	1.60482	0.111036	0.791363	-4.62508
IFT57	0.141234	-1.07441e-16	1.60292	0.111454	0.791363	-4.6278
BCAS3	0.160796	-8.59528e-17	1.60284	0.111473	0.791363	-4.62792
PLEKHM2	0.186457	-7.879e-17	1.60281	0.11148	0.791363	-4.62797
EMILIN2	0.160821	-3.65299e-16	1.60248	0.111553	0.791363	-4.62844
SPRR2G	0.152491	-2.93672e-16	1.60226	0.111602	0.791363	-4.62876
PURG	0.156941	-3.29486e-16	1.60109	0.111859	0.791363	-4.63043
CHST3	0.2182	-1.43255e-17	1.60081	0.111923	0.791363	-4.63084
PRRX2-AS1	0.136887	2.65021e-16	1.60032	0.112032	0.791363	-4.63154
FAM53B-AS1	0.152314	-4.65577e-17	1.59998	0.112107	0.791363	-4.63203
USP11	0.211374	-2.86509e-17	1.59987	0.112132	0.791363	-4.63219
IMMTP1	0.161231	-1.96975e-17	1.59962	0.112187	0.791363	-4.63254
MTCO3P18	0.160911	-7.16273e-18	1.59951	0.11221	0.791363	-4.63269
UBE2H	0.235361	-1.86231e-16	1.59944	0.112227	0.791363	-4.6328
MTCO2P4	0.136387	8.41621e-17	1.59925	0.11227	0.791363	-4.63308
RAB9BP1	0.136063	-8.77434e-17	1.59919	0.112281	0.791363	-4.63315
OR5B10P	0.17542	3.22323e-17	1.59865	0.112402	0.791363	-4.63393
ANGPT1	0.181772	-2.86509e-17	1.59818	0.112506	0.791363	-4.6346
CSF2RB	0.156045	1.79068e-16	1.59813	0.112517	0.791363	-4.63467
IGLV3-22	0.165213	2.04138e-16	1.5981	0.112524	0.791363	-4.63471
FCF1P3	0.130315	-9.84875e-17	1.59791	0.112568	0.791363	-4.635
ZBTB46-AS1	0.117137	-5.01391e-17	1.59757	0.112642	0.791363	-4.63548
CNGA2	0.135908	4.08276e-16	1.59751	0.112656	0.791363	-4.63557
L3MBTL2	0.166398	1.0386e-16	1.59746	0.112667	0.791363	-4.63563
FCGRT	0.183904	-1.5758e-16	1.59713	0.112741	0.791363	-4.63611
JUND	0.195061	6.08832e-17	1.59697	0.112777	0.791363	-4.63634
PSEN2	0.149876	-2.14882e-16	1.59692	0.112787	0.791363	-4.63641
PRKCZ	0.156369	-9.66968e-17	1.5969	0.112793	0.791363	-4.63644
CPNE6	0.129783	1.71906e-16	1.59675	0.112825	0.791363	-4.63665
ZNF709	0.184611	-1.11022e-16	1.59628	0.112931	0.791363	-4.63733
SAMSN1	0.242979	-2.00556e-16	1.59614	0.112961	0.791363	-4.63752
ARHGEF7	0.199262	-4.33345e-16	1.59549	0.113107	0.791363	-4.63845
TRABD2A	0.217489	3.9395e-17	1.59533	0.113143	0.791363	-4.63868
RARRES2P10	0.151013	-9.31155e-17	1.59495	0.113228	0.791363	-4.63923
NOG	0.158085	-5.73018e-17	1.59468	0.113289	0.791363	-4.63962
INPPL1	0.204026	1.46836e-16	1.5945	0.113329	0.791363	-4.63987
WHAMMP2	0.174689	-3.25904e-16	1.59426	0.113382	0.791363	-4.64021
ZFP37	0.192582	2.18463e-16	1.59409	0.11342	0.791363	-4.64045
FLT3	0.168801	-3.76043e-17	1.59387	0.113469	0.791363	-4.64076
SNORD93	0.607886	-1.8265e-16	1.5938	0.113485	0.791363	-4.64086
ADH1B	0.489157	-1.25348e-16	1.5938	0.113486	0.791363	-4.64087
SAP25	0.155932	7.16273e-17	1.5933	0.113598	0.791363	-4.64158
OR2T11	0.175028	-2.22045e-16	1.59316	0.113628	0.791363	-4.64178
HELB	0.152755	-5.37205e-17	1.59256	0.113765	0.791363	-4.64264
SLC26A4-AS1	0.157394	-2.00556e-16	1.59238	0.113805	0.791363	-4.6429
CBLN4	0.138027	7.16273e-18	1.59229	0.113824	0.791363	-4.64302
SMIM5	0.0991583	1.79068e-16	1.59156	0.113989	0.791363	-4.64407
MORC1	0.168723	-5.37205e-17	1.59142	0.11402	0.791363	-4.64426
SPOCD1	0.154969	-2.86509e-16	1.59138	0.114028	0.791363	-4.64432
ZNF707	0.186767	3.22323e-17	1.59133	0.114041	0.791363	-4.6444
SEC61A1	0.260036	4.26182e-16	1.59031	0.11427	0.791828	-4.64585
SNX19	0.208088	-1.68324e-16	1.58962	0.114425	0.7921	-4.64683
NLRP11	0.1787	-7.16273e-17	1.5879	0.114815	0.792961	-4.64929
WNT9A	0.16241	-2.11301e-16	1.58784	0.114827	0.792961	-4.64936
AIRE	0.129062	9.31155e-17	1.58746	0.114915	0.792961	-4.64991
KCNQ1-AS1	0.165527	7.16273e-17	1.58733	0.114943	0.792961	-4.65009
CIAO1	0.18352	3.22323e-16	1.58703	0.115011	0.792961	-4.65051
DYRK3	0.235306	3.65299e-16	1.58692	0.115036	0.792961	-4.65068
RBM43P1	0.183276	-3.9395e-17	1.58672	0.115081	0.792961	-4.65095
HMGN2P39	0.156183	-1.43255e-16	1.58605	0.115232	0.792961	-4.6519
CACNA1S	0.184958	-1.25348e-16	1.5853	0.115404	0.792961	-4.65298
TTC39C-AS1	0.150064	4.04694e-16	1.58499	0.115473	0.792961	-4.65341
TBC1D24	0.178995	3.22323e-17	1.58489	0.115498	0.792961	-4.65356
EFS	0.158575	-3.79625e-16	1.58445	0.115597	0.792961	-4.65418
NKX2-6	0.161709	-3.76043e-16	1.58444	0.115599	0.792961	-4.6542
LDB1	0.278889	1.25348e-16	1.58435	0.115621	0.792961	-4.65433
ATRN	0.221622	-1.68324e-16	1.58406	0.115685	0.792961	-4.65473
RIPK1	0.194831	-3.58136e-17	1.58404	0.115689	0.792961	-4.65476
PPP3R2	0.128436	3.58136e-16	1.58382	0.115741	0.792961	-4.65508
RERGL	0.165417	2.18463e-16	1.58308	0.115909	0.793254	-4.65613
DNAJC5G	0.184325	-2.07719e-16	1.58233	0.116081	0.793254	-4.6572
THBS4	0.269752	-1.11022e-16	1.5821	0.116132	0.793254	-4.65751
RHEBP2	0.16031	-2.65021e-16	1.58161	0.116245	0.793638	-4.65821
IGLC3	0.588178	8.6669e-16	1.58131	0.116314	0.793638	-4.65864
LYPLAL1-AS1	0.139664	-1.50417e-16	1.58113	0.116354	0.793638	-4.65889
LMCD1-AS1	0.147942	1.68324e-16	1.58061	0.116474	0.794	-4.65963
MNDA	0.27521	1.93394e-16	1.57994	0.116626	0.794441	-4.66058
HLA-DPA1	0.265283	-7.879e-17	1.57922	0.116793	0.794525	-4.66161
R3HDM2P1	0.16582	-3.04416e-17	1.57917	0.116803	0.794525	-4.66167
ITIH5	0.166249	-1.5758e-16	1.57898	0.116846	0.794525	-4.66193
USP9YP33	0.17204	4.29764e-17	1.57898	0.116846	0.794525	-4.66193
MTND2P11	0.200553	-3.58136e-18	1.57887	0.116871	0.794525	-4.66209
POGLUT1	0.174491	-1.09232e-16	1.57833	0.116995	0.794577	-4.66285
TTC7A	0.169169	2.75765e-16	1.57808	0.117053	0.79477	-4.66321
MOS	0.156377	-5.37205e-17	1.57754	0.117177	0.795415	-4.66397
GOLGA8R	0.179296	-2.68602e-16	1.57637	0.117447	0.795479	-4.66563
MS4A4A	0.209313	1.09232e-16	1.57606	0.117519	0.795479	-4.66607
TRIM64DP	0.15089	-3.4023e-17	1.57565	0.117612	0.795479	-4.66664
SH3GL1P2	0.161928	-2.04138e-16	1.57554	0.117639	0.795479	-4.66681
ZFHX4	0.181294	2.14882e-16	1.57538	0.117676	0.795479	-4.66704
KDM5B	0.248332	-1.75487e-16	1.57493	0.117779	0.795479	-4.66766
SNORD115-24	0.136022	1.00278e-16	1.57474	0.117822	0.795479	-4.66793
ARHGEF3-AS1	0.182376	8.41621e-17	1.57446	0.117887	0.795479	-4.66832
RASAL2	0.313585	4.04694e-16	1.57426	0.117933	0.795479	-4.6686
RHBDF2	0.153248	-4.01113e-16	1.57399	0.117997	0.795479	-4.66899
CCDC77	0.164182	-2.00556e-16	1.57388	0.118021	0.795479	-4.66914
FBXL2	0.266888	1.62952e-16	1.57386	0.118026	0.795479	-4.66917
CLEC18C	0.152157	1.00278e-16	1.57359	0.118089	0.795479	-4.66956
KLHL21	0.144499	-2.50696e-16	1.57277	0.11828	0.796171	-4.67072
GPRC5C	0.171855	-1.18185e-16	1.57252	0.118336	0.796226	-4.67106
STAT3	0.239174	-3.22323e-17	1.57125	0.118632	0.797338	-4.67286
BLVRA	0.157119	1.64743e-16	1.5709	0.118713	0.797338	-4.67335
JMJD7	0.186065	-1.53999e-16	1.5709	0.118713	0.797338	-4.67335
GRIP1	0.1976	9.66968e-17	1.57076	0.118745	0.797338	-4.67354
CEP112	0.182471	7.16273e-17	1.57029	0.118854	0.797676	-4.6742
IFNE	0.399683	-1.14604e-16	1.56983	0.118962	0.798008	-4.67486
OR7E97P	0.214663	1.50417e-16	1.56966	0.119	0.798068	-4.67509
MYH11	0.237577	-8.95341e-17	1.56865	0.119236	0.798271	-4.67651
C7orf77	0.152191	-5.01391e-17	1.56759	0.119484	0.798271	-4.67801
DONSON	0.17494	3.58136e-16	1.56745	0.119517	0.798271	-4.6782
NDUFB1P2	0.277386	-3.58136e-18	1.56735	0.119539	0.798271	-4.67834
TRAJ14	0.161223	-7.01947e-16	1.56697	0.11963	0.798271	-4.67888
PREX2	0.190674	1.79068e-16	1.56694	0.119636	0.798271	-4.67892
FAM13A-AS1	0.139433	-2.43533e-16	1.56679	0.11967	0.798271	-4.67913
RNF181	0.159395	-1.96975e-16	1.56658	0.11972	0.798271	-4.67943
INGX	0.117886	-1.43255e-17	1.56597	0.119863	0.798271	-4.68028
IGFBP6	0.158867	1.46836e-16	1.5659	0.11988	0.798271	-4.68039
LEPR	0.240103	3.25904e-16	1.5654	0.119997	0.798284	-4.68109
CGNL1	0.159059	-2.00556e-16	1.56472	0.120156	0.798548	-4.68204
OR5AN2P	0.140449	-9.66968e-17	1.56394	0.120339	0.798548	-4.68313
PKMYT1	0.160265	1.11022e-16	1.56388	0.120353	0.798548	-4.68321
SDK1	0.174748	-5.37205e-17	1.56384	0.120362	0.798548	-4.68327
TNFSF15	0.202976	1.28929e-16	1.56347	0.120449	0.798548	-4.68379
CSNK1E	0.164997	2.50696e-16	1.56331	0.120486	0.798548	-4.68401
GRID2IP	0.147956	1.53999e-16	1.56308	0.12054	0.798548	-4.68433
FBXL13	0.144479	1.89812e-16	1.56306	0.120547	0.798548	-4.68437
USP17L9P	0.174764	-2.07719e-16	1.5628	0.120607	0.798548	-4.68473
CPM	0.298546	5.90925e-17	1.56278	0.120612	0.798548	-4.68476
OR2L9P	0.196942	8.95341e-18	1.56262	0.120649	0.798548	-4.68498
PLIN2	0.367039	1.3251e-16	1.56261	0.120651	0.798548	-4.68499
MYLK-AS1	0.121534	-7.16273e-18	1.56223	0.120742	0.798761	-4.68553
OR4C12	0.15971	1.36092e-16	1.56084	0.121068	0.799949	-4.68747
EGFLAM-AS2	0.136999	-7.52087e-17	1.56004	0.121258	0.799949	-4.6886
TRGJP1	0.436457	5.73018e-17	1.55956	0.121371	0.799949	-4.68927
CACTIN	0.0957506	-9.31155e-17	1.55948	0.12139	0.799949	-4.68938
PDK4	0.296059	2.72184e-16	1.55932	0.121427	0.799949	-4.68959
EPB41L4A	0.178059	1.36092e-16	1.55902	0.1215	0.799949	-4.69003
RNF217	0.339923	-1.64743e-16	1.55798	0.121745	0.799949	-4.69147
NCKAP1L	0.180205	2.14882e-17	1.55779	0.12179	0.799949	-4.69174
HOXB-AS4	0.145899	-2.14882e-16	1.55732	0.121901	0.799949	-4.69239
AKIRIN1P2	0.156599	6.44646e-17	1.55726	0.121917	0.799949	-4.69249
PCDH1	0.29613	-3.33067e-16	1.55724	0.12192	0.799949	-4.69251
TENM1	0.125902	9.49062e-17	1.55717	0.121937	0.799949	-4.6926
EIF4EBP2P2	0.161519	1.39673e-16	1.55649	0.122099	0.800544	-4.69356
STK17B	0.307465	3.18741e-16	1.55635	0.122132	0.800544	-4.69375
ANKRD42	0.159447	-1.96975e-17	1.55625	0.122155	0.800544	-4.69388
FAM207CP	0.1462	-6.44646e-17	1.5554	0.122357	0.800675	-4.69507
IGLV3-27	0.250309	-1.86231e-16	1.55518	0.122409	0.800675	-4.69538
ADGRF1	0.169971	7.879e-17	1.55503	0.122446	0.80072	-4.69559
MAP2K1	0.179776	2.29207e-16	1.55466	0.122534	0.800932	-4.69611
MEIKIN	0.165089	-1.71906e-16	1.55465	0.122536	0.800932	-4.69612
TBCK	0.206762	-1.53999e-16	1.55362	0.122782	0.801849	-4.69756
RRAGD	0.247723	2.32789e-16	1.55262	0.123022	0.802203	-4.69895
SCAPER	0.234467	-2.39951e-16	1.5523	0.123097	0.802203	-4.69939
PRDX3P3	0.130617	1.75487e-16	1.5522	0.123121	0.802203	-4.69953
NDUFS7	0.222428	3.65299e-16	1.55182	0.123213	0.802203	-4.70007
ZC3HAV1	0.219809	9.66968e-17	1.55179	0.12322	0.802203	-4.70011
PARP1P1	0.16275	-4.65577e-17	1.55166	0.123251	0.802203	-4.70029
ALAD	0.173007	5.01391e-17	1.55164	0.123256	0.802203	-4.70032
GUCY2EP	0.152103	4.36926e-16	1.55136	0.123323	0.802203	-4.70071
TRAJ47	0.386135	-8.95341e-17	1.55125	0.123348	0.802203	-4.70085
GLIS2	0.211508	-1.07441e-17	1.55099	0.12341	0.802217	-4.70122
MGARP	0.21293	8.05807e-17	1.55075	0.123468	0.802217	-4.70155
OR52A4P	0.211634	-1.14604e-16	1.55024	0.12359	0.802332	-4.70226
NUBP1	0.181608	-3.83206e-16	1.55018	0.123607	0.802332	-4.70235
PSMD4	0.150048	-1.50417e-16	1.55016	0.12361	0.802332	-4.70237
LIPK	0.215781	-8.05807e-17	1.54989	0.123675	0.802332	-4.70275
CICP9	0.152363	-3.22323e-17	1.54973	0.123715	0.802332	-4.70298
PPP3CB	0.207709	7.16273e-18	1.54931	0.123814	0.802554	-4.70355
ADCY1	0.209947	-7.879e-17	1.54919	0.123843	0.802554	-4.70372
SCRN1	0.301402	-7.52087e-17	1.54842	0.124028	0.803022	-4.70479
COPS6	0.170799	-5.01391e-17	1.54837	0.124039	0.803022	-4.70486
TRAPPC13P1	0.164676	1.79068e-18	1.54828	0.124062	0.803022	-4.70499
AXDND1	0.187836	1.5758e-16	1.54795	0.12414	0.803147	-4.70544
IGKV1OR-2	0.212112	-5.73018e-17	1.54781	0.124175	0.803154	-4.70564
MAPK10	0.15669	-2.22045e-16	1.54753	0.124241	0.803154	-4.70602
HSD11B1	0.178593	-7.16273e-17	1.54736	0.124283	0.803154	-4.70626
PDLIM5	0.240022	-4.29764e-17	1.54732	0.124293	0.803154	-4.70632
FKBP4P7	0.132669	-4.22601e-16	1.54695	0.124382	0.803154	-4.70683
GTF2A1L	0.203465	1.79068e-17	1.54673	0.124435	0.803154	-4.70714
BRK1P2	0.147148	-3.9395e-17	1.54661	0.124464	0.803154	-4.7073
GAPDHP16	0.177795	1.18185e-16	1.54645	0.124503	0.803154	-4.70753
TRAJ10	0.139513	1.21766e-16	1.54626	0.124549	0.803154	-4.7078
FAM117A	0.160191	-1.46836e-16	1.54565	0.124697	0.803698	-4.70864
OGFR-AS1	0.168117	-7.16273e-17	1.54486	0.124886	0.80454	-4.70973
ENTHD1	0.144734	2.14882e-16	1.54404	0.125085	0.805061	-4.71087
COQ9	0.143022	3.43811e-16	1.54369	0.125171	0.8051	-4.71136
CD48	0.221822	1.93394e-16	1.54365	0.125179	0.8051	-4.71141
TRAJ55	0.130747	1.86231e-16	1.54318	0.125294	0.805285	-4.71206
HMGB1P30	0.141046	1.23557e-16	1.54278	0.125392	0.805516	-4.71262
PDPR	0.167091	1.79068e-16	1.54136	0.125735	0.805519	-4.71457
TBC1D3P4	0.134547	-1.5758e-16	1.54107	0.125807	0.805519	-4.71498
IGHV3-71	0.187321	2.29207e-16	1.54094	0.125838	0.805519	-4.71516
MPDZ	0.197589	7.16273e-18	1.54071	0.125894	0.805519	-4.71548
CHIC2	0.169441	6.44646e-17	1.53961	0.126162	0.806226	-4.717
IGKV3-7	0.145055	-3.58136e-17	1.53948	0.126195	0.806226	-4.71718
TSSK5P	0.152958	-1.68324e-16	1.5389	0.126336	0.806345	-4.71799
ZNF99	0.16382	-1.36092e-16	1.53849	0.126436	0.806345	-4.71855
TRAPPC2P4	0.130594	-4.29764e-17	1.53824	0.126496	0.806355	-4.71889
EMID1	0.156128	1.43255e-17	1.53822	0.126502	0.806355	-4.71892
ZNF746	0.177163	1.00278e-16	1.53789	0.126582	0.806355	-4.71937
C20orf194	0.191551	1.93394e-16	1.53755	0.126666	0.806355	-4.71985
TRAJ13	0.208512	1.75487e-16	1.53743	0.126695	0.806355	-4.72001
CALHM2	0.134316	-3.79625e-16	1.53738	0.126707	0.806355	-4.72008
PAF1	0.133085	4.01113e-16	1.53722	0.126746	0.806355	-4.7203
PRNP	0.18734	2.07719e-16	1.53702	0.126794	0.806355	-4.72057
ERMAP	0.246634	2.00556e-16	1.53693	0.126817	0.806355	-4.7207
IGHV3-16	0.136497	-1.07441e-17	1.53635	0.126958	0.806355	-4.72149
HYDIN	0.156043	-6.62552e-17	1.53489	0.127317	0.806355	-4.72351
MTND6P6	0.145112	-4.65577e-17	1.53478	0.127344	0.806355	-4.72366
F2RL3	0.143185	-3.9395e-16	1.53472	0.127358	0.806355	-4.72374
PRR5L	0.207388	1.8265e-16	1.53455	0.1274	0.806355	-4.72397
COL5A2	0.158267	2.22045e-16	1.53412	0.127506	0.806355	-4.72457
EYA2	0.156065	4.08276e-16	1.53313	0.12775	0.806355	-4.72594
SH3BGRL	0.215261	-4.29764e-17	1.5327	0.127856	0.806355	-4.72653
SLAMF6	0.262006	2.68602e-17	1.53257	0.127889	0.806355	-4.72671
LTN1	0.264289	3.43811e-16	1.53256	0.127891	0.806355	-4.72672
SNAI3-AS1	0.151432	2.07719e-16	1.53242	0.127925	0.806355	-4.72691
NDUFAF1	0.171476	1.86231e-16	1.53235	0.127942	0.806355	-4.72701
EOMES	0.167526	-2.07719e-16	1.53206	0.128013	0.806355	-4.7274
PRDM1	0.332691	2.47114e-16	1.532	0.128029	0.806355	-4.72749
USP3-AS1	0.145727	0	1.53164	0.128118	0.806355	-4.72799
LARP1P1	0.141884	3.1516e-16	1.53151	0.12815	0.806355	-4.72816
DDX18P6	0.157556	1.07441e-17	1.53128	0.128205	0.806355	-4.72847
ZDHHC6	0.212362	1.79068e-16	1.53123	0.128218	0.806355	-4.72855
KRTAP9-7	0.177142	-8.59528e-17	1.53121	0.128222	0.806355	-4.72857
UBQLN3	0.160817	7.879e-17	1.53061	0.128372	0.806527	-4.7294
COL4A2-AS1	0.123659	-1.50417e-16	1.52927	0.128704	0.807046	-4.73124
UBALD1	0.224579	1.79068e-16	1.52864	0.12886	0.807653	-4.73211
CTD-2194D22.4	0.153959	-1.8265e-16	1.52806	0.129003	0.807982	-4.7329
NCRUPAR	0.0858399	-1.5758e-16	1.52804	0.129008	0.807982	-4.73292
DNAJA1P6	0.177513	-9.31155e-17	1.52766	0.129102	0.807982	-4.73345
MYO1H	0.143841	-1.12813e-16	1.52747	0.129149	0.807982	-4.7337
ZSWIM5P2	0.205215	-2.11301e-16	1.52743	0.12916	0.807982	-4.73376
OR7E11P	0.151684	-1.18185e-16	1.52737	0.129175	0.807982	-4.73385
IGKV1-6	0.229511	-1.68324e-16	1.52735	0.129179	0.807982	-4.73387
OR4K3	0.157152	3.76043e-17	1.52661	0.129364	0.808222	-4.73489
PRR12	0.150032	7.879e-17	1.5266	0.129365	0.808222	-4.7349
FGF10	0.144137	-3.36648e-16	1.52589	0.129543	0.808604	-4.73587
UBE2V2P4	0.162218	-2.14882e-16	1.5256	0.129614	0.808604	-4.73627
CDK9	0.176707	-2.07719e-16	1.52552	0.129634	0.808604	-4.73638
VIM2P	0.181758	-1.07441e-16	1.52493	0.129782	0.808977	-4.73719
[truncated: 25,303 more rows]

## Sheet: MU
Gene	logFC	AveExpr	t	P.Value	adj.P.Val	B
FGF7	0.728121	8.59528e-17	5.5842	1.37682e-07	0.00375899	6.75741
FNDC1	0.50622	-3.58136e-16	5.26442	5.87261e-07	0.00599211	5.5087
MUC2	1.75646	-6.44646e-17	5.23874	6.58425e-07	0.00599211	5.41028
FGFR1	0.648869	3.86787e-16	4.90547	2.818e-06	0.0181645	4.16026
ZNF70	0.400509	-1.79068e-16	4.84267	3.68227e-06	0.0181645	3.93054
BASP1	0.5902	3.36648e-16	4.79148	4.57226e-06	0.0181645	3.74471
ANGPTL2	0.699779	-2.82928e-16	4.75749	5.27483e-06	0.0181645	3.62205
GREM1	0.903097	7.16273e-17	4.73008	5.91647e-06	0.0181645	3.52356
MEG8	0.57387	4.01113e-16	4.72721	5.98787e-06	0.0181645	3.51327
B3GALNT1	0.476129	-6.80459e-17	4.61598	9.49909e-06	0.0259344	3.11761
PEAK1	0.407702	-4.08276e-16	4.49791	1.53843e-05	0.0361564	2.70466
COL1A2	0.696775	2.86509e-17	4.48989	1.58918e-05	0.0361564	2.67688
GLI3	0.598469	7.16273e-17	4.41192	2.17456e-05	0.0379178	2.40858
LOXL1	0.870239	1.93394e-16	4.40815	2.20757e-05	0.0379178	2.3957
AEBP1	0.777201	-1.86231e-16	4.39774	2.30125e-05	0.0379178	2.36016
LGALS1	0.770631	-3.29486e-16	4.39471	2.32926e-05	0.0379178	2.34982
ARF4	0.563619	-7.16273e-18	4.37834	2.48628e-05	0.0379178	2.29405
TUSC3	0.745134	2.07719e-16	4.37697	2.49989e-05	0.0379178	2.28939
PECAM1	0.447933	2.07719e-16	4.35861	2.68907e-05	0.0384221	2.22704
GPX8	0.692729	-2.65021e-16	4.34555	2.83193e-05	0.0384221	2.18281
CALD1	0.7209	-4.01113e-16	4.33369	2.96791e-05	0.0384221	2.14274
COL12A1	0.819235	-3.22323e-16	4.32299	3.09606e-05	0.0384221	2.10663
ACTA2	0.950765	-2.86509e-17	4.303	3.34985e-05	0.0397642	2.03934
MYL9	0.884543	3.9395e-16	4.26448	3.89629e-05	0.0428695	1.91033
MMP2	0.709155	7.16273e-18	4.26257	3.92549e-05	0.0428695	1.90396
MEDAG	0.934445	9.31155e-17	4.24919	4.13612e-05	0.0429902	1.85936
SNORD114-14	0.987481	-2.86509e-17	4.22435	4.55621e-05	0.0429902	1.77683
SULF1	0.924706	-6.44646e-17	4.20291	4.95149e-05	0.0429902	1.70587
DSEL	0.510192	-1.18185e-16	4.20282	4.95315e-05	0.0429902	1.70558
SPARC	0.969321	3.00835e-16	4.20258	4.95776e-05	0.0429902	1.70479
STEAP4	0.704315	-1.18185e-16	4.1984	5.03877e-05	0.0429902	1.69097
FBN1	0.549027	-2.93672e-16	4.15205	6.02488e-05	0.0496672	1.53861
ASPN	1.02913	-3.65299e-16	4.13626	6.40139e-05	0.0496672	1.48697
FAM174B	0.575545	1.25348e-16	4.13264	6.49076e-05	0.0496672	1.47516
COL6A3	0.835277	1.25348e-16	4.1303	6.54904e-05	0.0496672	1.46754
SLC18A1	0.440819	6.44646e-17	4.1145	6.9571e-05	0.0513359	1.41606
NFATC4	0.341622	-3.97531e-16	4.09375	7.52988e-05	0.0541002	1.3487
SRGAP2	0.486013	1.66533e-16	4.03477	9.41454e-05	0.0659066	1.15863
GLT8D2	0.714893	-2.47114e-16	4.01351	0.000101987	0.0696114	1.0906
DACT1	0.483489	-2.93672e-16	3.98528	0.000113362	0.0743137	1.00073
CNN1	0.759465	-3.86787e-16	3.98303	0.00011432	0.0743137	0.993577
SNORD114-25	0.834301	2.57858e-16	3.97318	0.000118604	0.0743649	0.962326
VIM	0.546073	-3.4023e-16	3.97038	0.000119847	0.0743649	0.953469
CEP295NL	0.694348	2.93672e-16	3.96042	0.000124378	0.0754618	0.921943
SPINK4	1.23451	2.05928e-16	3.94666	0.000130908	0.0764116	0.878492
CSRP2	0.574606	3.00835e-16	3.94536	0.000131541	0.0764116	0.874393
DKK3	0.683401	5.73018e-17	3.90307	0.000153811	0.0874867	0.741646
HSCB	0.438839	3.22323e-16	3.89204	0.000160182	0.0892507	0.707221
MXRA5	0.605796	-3.43811e-16	3.87675	0.000169437	0.0899826	0.659582
MFAP2	0.631928	-2.18463e-16	3.87462	0.000170768	0.0899826	0.652948
TLR6	0.472075	1.3072e-16	3.87364	0.000171383	0.0899826	0.649901
THBS2	0.750098	-1.71906e-16	3.85513	0.000183391	0.091064	0.592492
COL4A1	0.404263	7.16273e-18	3.85053	0.000186505	0.091064	0.578223
MYLK	0.713964	1.50417e-16	3.84564	0.000189859	0.091064	0.563119
MRAS	0.565208	-2.14882e-17	3.84524	0.000190134	0.091064	0.561892
FCGR1A	0.601981	0	3.84429	0.000190797	0.091064	0.558943
BGN	0.974626	-3.4023e-16	3.82938	0.000201444	0.091064	0.512937
PALLD	0.667869	5.01391e-17	3.82842	0.000202149	0.091064	0.509976
ARHGEF17	0.372846	-3.22323e-16	3.82489	0.000204758	0.091064	0.499114
ANTXR1	1.03742	-5.73018e-17	3.8244	0.000205125	0.091064	0.497597
RHOJ	0.601823	2.11301e-16	3.81387	0.000213114	0.091064	0.465236
CD53	0.756709	3.83206e-16	3.81015	0.000216016	0.091064	0.453785
VEGFC	0.483334	2.75765e-16	3.80914	0.000216803	0.091064	0.450703
CCDC80	0.697078	-2.3637e-16	3.78606	0.000235678	0.0974921	0.380038
REG4	1.33332	-1.3251e-16	3.76743	0.000252036	0.101247	0.323257
ACVR1	0.508283	-3.22323e-17	3.76085	0.000258065	0.101247	0.303258
OSMR	0.414614	-2.14882e-16	3.75922	0.000259588	0.101247	0.298282
PRDM6	0.372425	-1.00278e-16	3.75345	0.000265015	0.101908	0.280782
VSIG4	0.594672	7.16273e-17	3.74756	0.000270674	0.102317	0.262915
COL5A1	0.573663	-4.65577e-17	3.74243	0.000275693	0.102317	0.247382
NID2	0.49391	1.0386e-16	3.74078	0.000277322	0.102317	0.2424
PXDC1	0.570004	-3.11579e-16	3.73317	0.000284975	0.103739	0.219386
GJA1	0.37833	-2.39951e-16	3.71705	0.00030185	0.108436	0.170765
FDCSP	0.76056	1.39673e-16	3.70812	0.000311604	0.11037	0.143895
TAGLN	0.577601	-4.29764e-17	3.70478	0.00031532	0.11037	0.133879
LAYN	0.322338	1.36092e-16	3.6927	0.000329137	0.112573	0.0976566
GLIS3	0.620671	-1.07441e-16	3.69209	0.00032986	0.112573	0.0958047
TRDJ2	0.456877	1.93394e-16	3.67796	0.000346789	0.116889	0.0535469
COL11A1	0.634876	3.79625e-16	3.66632	0.000361338	0.118667	0.0188568
NRP1	0.54939	-2.18463e-16	3.66388	0.00036447	0.118667	0.0115727
TIMP3	0.555477	4.08276e-16	3.66338	0.000365104	0.118667	0.010106
LUM	0.972779	1.18185e-16	3.65022	0.000382432	0.121503	-0.0290185
COL15A1	0.2657	-2.86509e-17	3.64935	0.000383606	0.121503	-0.0316037
SERPINF1	0.797587	-1.3251e-16	3.64308	0.000392156	0.121503	-0.0501998
WFDC1	0.460938	-1.61161e-16	3.64224	0.00039332	0.121503	-0.0526992
NEXN	0.705156	3.25904e-16	3.64025	0.000396078	0.121503	-0.0585939
PXK	0.383714	-4.36926e-16	3.63223	0.000407379	0.121701	-0.0823184
C5AR1	0.525458	-7.16273e-18	3.63184	0.000407937	0.121701	-0.0834733
ADAP2	0.397555	3.90369e-16	3.62892	0.000412138	0.121701	-0.0921107
FPR1	0.50325	-2.00556e-16	3.62725	0.000414555	0.121701	-0.0970421
ARHGAP31	0.547506	-3.22323e-17	3.61918	0.00042643	0.122484	-0.120852
FAM133CP	0.687074	-3.61718e-16	3.61634	0.000430681	0.122484	-0.129214
FCGBP	0.952809	-3.9395e-16	3.61079	0.000439115	0.123498	-0.145559
PKD2	0.379761	-2.07719e-16	3.60808	0.000443292	0.123498	-0.153538
PLXDC2	0.773555	-6.08832e-17	3.60469	0.000448561	0.123703	-0.163496
PARVA	0.402185	4.29764e-16	3.59785	0.000459392	0.124048	-0.183598
CRYZP2	0.274373	6.08832e-17	3.59566	0.000462908	0.124048	-0.190023
CLIC4	0.410902	-2.07719e-16	3.59533	0.000463441	0.124048	-0.190991
THY1	0.55447	-1.86231e-16	3.59056	0.0004712	0.12409	-0.204979
CD93	0.511959	2.32789e-16	3.58837	0.000474797	0.12409	-0.211384
IGHV3-30-2	0.223385	-2.86509e-16	3.58563	0.00047933	0.12409	-0.219387
TCF4	0.62644	-1.79068e-16	3.58085	0.000487355	0.12409	-0.233371
CTSK	0.704972	-2.72184e-16	3.57942	0.000489788	0.12409	-0.237564
DCN	0.923748	-1.53999e-16	3.57879	0.000490868	0.12409	-0.239418
ARHGAP1	0.468348	2.50696e-17	3.57109	0.000504148	0.125061	-0.261895
ZEB1	0.610343	-8.59528e-17	3.56692	0.000511479	0.125061	-0.274049
RGS4	0.529196	7.879e-17	3.56692	0.000511482	0.125061	-0.274053
STAB1	0.462801	2.93672e-16	3.56604	0.000513033	0.125061	-0.276603
GIMAP2	0.388787	7.879e-17	3.56046	0.000523045	0.126373	-0.292872
CYTIP	0.474285	-2.3637e-16	3.55771	0.000528028	0.126458	-0.300851
TPM4	0.351678	-3.58136e-16	3.55021	0.000541882	0.127206	-0.322646
SERPINA1	0.621174	2.97253e-16	3.54976	0.000542723	0.127206	-0.323951
ABCA1	0.464728	1.79068e-17	3.54558	0.000550618	0.127398	-0.336102
NCF1	0.520527	2.47114e-16	3.53395	0.000573115	0.131489	-0.369787
ADAM19	0.312265	-2.50696e-16	3.52499	0.000591039	0.132753	-0.395686
PALMD	0.468402	-3.22323e-16	3.52392	0.00059321	0.132753	-0.398768
IL3RA	0.343455	3.58136e-16	3.51753	0.000606342	0.134588	-0.417177
SFRP4	1.12613	8.23714e-17	3.50269	0.000637962	0.139341	-0.459903
SNORD113-1	0.573449	-5.01391e-17	3.49373	0.000657767	0.142527	-0.48559
TRAJ56	0.725716	7.16273e-17	3.48044	0.000688239	0.147955	-0.523627
LST1	0.523705	5.01391e-17	3.47291	0.000706099	0.14921	-0.545139
ANOS1	0.518204	-3.43811e-16	3.47109	0.00071047	0.14921	-0.55032
P3H1	0.280974	3.72462e-16	3.46034	0.000736857	0.15357	-0.580932
HYAL1	0.368009	3.22323e-16	3.45718	0.000744797	0.154049	-0.589926
GNAI2P1	0.433873	-4.15438e-16	3.44267	0.000782253	0.159002	-0.631094
ST3GAL3	0.336623	-1.07441e-17	3.44117	0.000786218	0.159002	-0.635336
MUC5B	0.641737	-5.01391e-17	3.42954	0.000817658	0.163159	-0.66822
MDFIC	0.576149	-3.07997e-16	3.42323	0.000835223	0.163159	-0.686039
EMCN	0.624446	-4.15438e-16	3.42077	0.000842165	0.163159	-0.692979
AP1G2	0.237815	-1.00278e-16	3.4206	0.000842628	0.163159	-0.693439
PDE4D	0.729518	1.18185e-16	3.41269	0.000865338	0.166376	-0.71573
PCDH7	0.643418	2.50696e-17	3.39691	0.000912321	0.173328	-0.76003
COL6A1	0.687119	2.07719e-16	3.39629	0.00091419	0.173328	-0.761743
OSGEPL1	0.266071	-8.05807e-17	3.39059	0.000931785	0.173682	-0.77771
RNF152	0.339162	-6.44646e-17	3.38737	0.000941877	0.173682	-0.786732
RAB23	0.422231	-1.5758e-16	3.38594	0.000946353	0.173682	-0.790702
COPZ2	0.648157	-4.29764e-17	3.38547	0.000947866	0.173682	-0.79204
PDGFRL	0.33262	-1.96975e-16	3.38116	0.000961588	0.175022	-0.804075
CLMP	0.367087	3.79625e-16	3.37628	0.000977358	0.176714	-0.817693
BICC1	0.520677	-4.22601e-16	3.36803	0.00100454	0.180434	-0.840652
HLA-DPB1	0.415163	6.44646e-17	3.36189	0.00102525	0.182326	-0.857733
OR10G7	0.311744	-2.50696e-17	3.35853	0.00103675	0.182326	-0.867065
PSD3	0.550094	1.07441e-16	3.35479	0.0010497	0.182326	-0.877448
ADARB1	0.480737	1.86231e-16	3.35449	0.00105074	0.182326	-0.878278
FAM177B	0.679816	1.68324e-16	3.35361	0.00105381	0.182326	-0.880718
ADAMTS16	0.867913	4.26182e-16	3.35323	0.00105514	0.182326	-0.881773
RUNX1-IT1	0.580711	5.73018e-17	3.34684	0.00107772	0.183715	-0.899478
PER3	0.535654	1.36092e-16	3.34629	0.00107967	0.183715	-0.900994
MAP7D3	0.496686	-1.07441e-17	3.34526	0.00108337	0.183715	-0.903852
GSDMC	0.335449	-7.16273e-17	3.34151	0.00109688	0.184858	-0.914216
SLC2A3	0.652492	4.33345e-16	3.33939	0.00110458	0.185013	-0.920065
AMOTL1	0.331532	-2.50696e-17	3.33666	0.00111461	0.185494	-0.927622
GNAI2	0.548759	1.8265e-16	3.33492	0.00112104	0.185494	-0.932431
PRRX1	0.630166	3.58136e-17	3.32891	0.00114347	0.188066	-0.948992
HLA-DRB9	0.441676	-1.21766e-16	3.32658	0.00115229	0.188383	-0.955417
R3HCC1	0.318324	1.07441e-16	3.31911	0.00118097	0.191921	-0.975958
PRR30	0.302029	1.53999e-16	3.3107	0.00121408	0.194925	-0.999057
PTGIS	0.381767	-5.37205e-17	3.30762	0.00122643	0.194925	-1.00751
CLEC7A	0.442117	-2.86509e-17	3.30723	0.00122801	0.194925	-1.00859
COL3A1	0.74834	6.15995e-16	3.30231	0.00124799	0.196951	-1.02207
WDR47	0.316847	-8.95341e-17	3.29679	0.00127077	0.197199	-1.03717
NR2F2	0.570965	9.31155e-17	3.29668	0.00127123	0.197199	-1.03747
FGF7P1	0.329344	4.33345e-16	3.28665	0.00131363	0.201731	-1.06486
QKI	0.47076	1.21766e-16	3.27644	0.00135812	0.205324	-1.09265
TOX	0.479438	-6.44646e-17	3.27411	0.00136848	0.205324	-1.099
DPYD	0.713375	2.82928e-16	3.27259	0.00137527	0.205324	-1.10312
MAN2B2	0.322429	1.79068e-16	3.27102	0.00138233	0.205324	-1.1074
CXCL12	0.56893	-2.29207e-16	3.26938	0.00138972	0.205324	-1.11184
IRAK3	0.47101	5.01391e-17	3.26831	0.00139459	0.205324	-1.11476
CDR1	0.724606	-4.1902e-16	3.26405	0.00141403	0.205324	-1.12631
PZP	0.279453	3.43811e-16	3.26303	0.00141876	0.205324	-1.12909
MCTP1	0.59559	-1.93394e-16	3.26125	0.00142695	0.205324	-1.13389
GPR65	0.465227	-2.14882e-17	3.25901	0.0014374	0.205324	-1.13997
THSD7A	0.331941	1.93394e-16	3.25716	0.00144604	0.205324	-1.14497
FBLN5	0.502273	6.80459e-17	3.25668	0.00144831	0.205324	-1.14628
ANO8	0.279959	7.879e-17	3.25426	0.00145975	0.205324	-1.15284
RSPO3	0.583115	-2.6144e-16	3.24975	0.00148124	0.205324	-1.16502
BNC2	0.651473	1.8265e-16	3.2491	0.00148437	0.205324	-1.16678
GLI2	0.540597	4.29764e-17	3.24908	0.00148445	0.205324	-1.16683
IGKV3OR22-2	0.253194	1.43255e-16	3.24397	0.00150922	0.205324	-1.18062
PRR16	0.428936	-2.04138e-16	3.24335	0.00151226	0.205324	-1.1823
CTHRC1	0.628925	-4.22601e-16	3.24282	0.00151487	0.205324	-1.18373
BLVRA	0.262228	1.64743e-16	3.24195	0.00151913	0.205324	-1.18607
HACD4	0.572431	2.25626e-16	3.23649	0.00154622	0.205738	-1.2008
BHLHE41	0.777711	-3.79625e-16	3.23522	0.00155254	0.205738	-1.2042
FABP7	0.240858	-1.43255e-17	3.23282	0.00156466	0.205738	-1.21067
ADCY4	0.378814	-4.1902e-16	3.23246	0.00156646	0.205738	-1.21163
PMP22	0.637432	8.95341e-17	3.23005	0.0015787	0.206228	-1.21811
FGF7P2	0.341589	1.36092e-16	3.22456	0.00160691	0.208914	-1.23287
DCLK2	0.455741	7.879e-17	3.22066	0.00162723	0.210553	-1.24333
ADAM12	0.626052	-2.86509e-17	3.21297	0.00166798	0.212069	-1.26392
METTL24	0.289485	-3.9395e-17	3.21283	0.00166872	0.212069	-1.26429
FMNL3	0.417619	-7.16273e-18	3.21135	0.00167672	0.212069	-1.26827
HTRA1	0.412972	-3.18741e-16	3.19993	0.00173933	0.218835	-1.29878
GYPC	0.350772	1.28929e-16	3.19636	0.00175932	0.220335	-1.30829
TRAF3IP2	0.267247	-4.36926e-16	3.1939	0.00177322	0.221061	-1.31483
CD163	0.681377	-2.86509e-16	3.18749	0.00181	0.222398	-1.33191
CACNA1C-IT3	0.458131	1.86231e-16	3.18418	0.00182923	0.222398	-1.3407
CHST11	0.465254	8.59528e-17	3.18218	0.00184096	0.222398	-1.34601
GNB4	0.299167	1.96975e-16	3.17696	0.00187185	0.223843	-1.35985
GPR176	0.346839	1.43255e-17	3.17672	0.00187333	0.223843	-1.3605
PRRC2B	0.37361	3.33067e-16	3.17293	0.00189608	0.223843	-1.37054
ANAPC10	0.328486	3.72462e-16	3.17253	0.00189849	0.223843	-1.37159
MS4A1	0.390163	-1.43255e-16	3.17184	0.00190268	0.223843	-1.37342
SPATA18	0.445901	-3.72462e-16	3.17177	0.00190312	0.223843	-1.37361
FLRT2	0.352968	3.76043e-17	3.169	0.00191994	0.223843	-1.38093
CD37	0.346721	2.65021e-16	3.16828	0.00192438	0.223843	-1.38285
KCNMA1	0.313842	-7.879e-17	3.16654	0.00193508	0.223863	-1.38746
PDLIM7	0.234639	1.43255e-17	3.16209	0.00196265	0.226094	-1.39921
ATN1	0.2974	4.29764e-17	3.1603	0.00197385	0.226429	-1.40394
ASIC3	0.294773	1.43255e-16	3.15667	0.00199672	0.227542	-1.41351
ADAMTS5	0.312006	-1.50417e-16	3.15602	0.00200085	0.227542	-1.41522
IQCJ	0.359447	-1.53999e-16	3.14517	0.00207088	0.231783	-1.44379
RCAN1	0.422342	7.16273e-17	3.14324	0.00208359	0.231783	-1.44887
ABCC9	0.726389	-9.84875e-17	3.1425	0.00208844	0.231783	-1.4508
PCAT19	0.187046	-1.11022e-16	3.13423	0.00214379	0.236293	-1.47251
FCMR	0.448211	-1.53999e-16	3.13322	0.00215061	0.236293	-1.47515
DOCK10	0.330003	2.32789e-17	3.13257	0.00215504	0.236293	-1.47685
RAB31	0.748196	3.00835e-16	3.12919	0.00217817	0.237531	-1.48571
TPM1	0.461252	3.58136e-16	3.12821	0.00218491	0.237531	-1.48828
SFRP2	1.03067	2.25626e-16	3.12529	0.00220513	0.237531	-1.49592
GRIA3	0.576089	-1.18185e-16	3.12509	0.00220648	0.237531	-1.49643
FAM20C	0.343866	-6.08832e-17	3.12461	0.00220984	0.237531	-1.49769
HSPG2	0.442286	1.71906e-16	3.11984	0.00224328	0.239537	-1.51015
NREP	0.436129	2.57858e-16	3.11794	0.00225679	0.239537	-1.51513
RFTN2	0.510953	-5.55112e-17	3.11724	0.00226176	0.239537	-1.51695
SNX24	0.515206	3.58136e-16	3.11698	0.00226359	0.239537	-1.51762
NRP2	0.742498	-3.97531e-16	3.11378	0.00228647	0.24011	-1.52596
BLID	0.402905	7.16273e-17	3.11173	0.0023013	0.24011	-1.53132
S1PR1	0.341725	-2.00556e-16	3.1103	0.00231165	0.24011	-1.53504
CTSB	0.570689	6.44646e-17	3.11004	0.00231353	0.24011	-1.53572
NCF2	0.324316	1.5758e-16	3.09996	0.00238784	0.242833	-1.56193
SNAI2	0.60231	3.54555e-16	3.09837	0.00239981	0.242833	-1.56607
SPOCK1	0.452162	1.89812e-16	3.09741	0.00240703	0.242833	-1.56856
GAB3	0.372429	-3.72462e-16	3.09697	0.00241037	0.242833	-1.5697
COL10A1	0.63581	3.65299e-16	3.09571	0.00241984	0.242891	-1.57295
CRMP1	0.372438	-3.79625e-16	3.09341	0.00243733	0.24375	-1.57892
INHBA	0.572842	0	3.0921	0.00244736	0.243861	-1.58232
DYSF	0.343759	4.11857e-16	3.09014	0.00246244	0.244471	-1.58741
POSTN	0.737894	-1.61161e-16	3.0857	0.00249684	0.246133	-1.59891
UNC93B5	0.162981	3.00835e-16	3.08565	0.00249721	0.246133	-1.59903
ROR1	0.371922	-1.11022e-16	3.08399	0.00251016	0.24652	-1.60331
SNORD114-21	0.444653	-2.68602e-17	3.08229	0.00252358	0.246949	-1.60773
SNORD114-22	0.411316	-1.21766e-16	3.08003	0.00254137	0.247801	-1.61354
ITGA5	0.718578	4.11857e-16	3.07461	0.00258475	0.250244	-1.62756
ADAMTS6	0.543939	-2.82928e-16	3.07168	0.0026084	0.251641	-1.6351
IL4R	0.410089	-8.59528e-17	3.06388	0.00267245	0.253666	-1.65517
FCGR3A	0.474518	1.39673e-16	3.06338	0.00267666	0.253666	-1.65648
DAP	0.339512	-2.72184e-16	3.06288	0.00268082	0.253666	-1.65776
CXCR4	0.473753	-1.43255e-16	3.06237	0.00268507	0.253666	-1.65907
UBE2Q2P8	0.478234	-7.3418e-17	3.06125	0.00269442	0.253666	-1.66195
CYYR1	0.378285	2.29207e-16	3.05951	0.00270899	0.253839	-1.66641
COL14A1	0.549436	1.61161e-16	3.05881	0.00271485	0.253839	-1.6682
ADGRL2	0.30613	-1.00278e-16	3.05436	0.00275262	0.25641	-1.67963
LY96	0.592852	-3.33067e-16	3.05247	0.00276881	0.25641	-1.68448
KLRD1	0.271674	-8.23714e-17	3.05227	0.00277053	0.25641	-1.68499
SPEG	0.229661	-2.57858e-16	3.05055	0.00278537	0.256913	-1.68941
TREM2	0.327391	3.68881e-16	3.04175	0.00286222	0.261352	-1.71191
CAV1	0.490338	-2.43533e-16	3.03563	0.00291686	0.265312	-1.72755
CRH	0.200061	1.53999e-16	3.03239	0.00294615	0.266137	-1.7358
VGLL3	0.452651	-3.58136e-18	3.02499	0.00301419	0.269009	-1.75466
MCAM	0.242736	3.86787e-16	3.02489	0.00301504	0.269009	-1.7549
MLLT11	0.446616	-1.46836e-16	3.02302	0.0030325	0.269685	-1.75967
CPQ	0.434721	2.14882e-16	3.02185	0.00304344	0.26978	-1.76264
CYBRD1	0.630918	-5.73018e-17	3.01992	0.00306152	0.270047	-1.76754
CALU	0.252301	-2.86509e-17	3.01942	0.00306625	0.270047	-1.76881
LBH	0.397983	8.59528e-17	3.01543	0.00310409	0.270866	-1.77894
CCL4L2	0.439946	2.04138e-16	3.0138	0.00311967	0.270866	-1.78307
MXRA8	0.468084	-2.00556e-16	3.01335	0.00312399	0.270866	-1.78422
FAM228B	0.253453	1.8265e-16	3.01313	0.0031261	0.270866	-1.78477
MTND4P16	0.217433	-2.14882e-17	3.01073	0.00314929	0.270866	-1.79087
FZD7	0.466972	-2.47114e-16	3.0105	0.00315142	0.270866	-1.79143
CACNG3	0.23694	7.52087e-17	3.00935	0.0031626	0.270866	-1.79436
AKAP12	0.727536	-5.37205e-17	3.00849	0.00317098	0.270866	-1.79654
SPARCL1	0.757364	-3.00835e-16	3.0069	0.00318642	0.270866	-1.80055
MED12	0.344532	6.08832e-17	3.00607	0.00319459	0.270866	-1.80266
FERMT2	0.381611	-3.58136e-17	3.00423	0.00321263	0.271552	-1.80731
JAM2	0.601948	-3.76043e-16	3.00263	0.00322841	0.271819	-1.81135
SLAMF1	0.259479	3.58136e-17	3.0019	0.00323571	0.271819	-1.81322
TNFAIP6	0.56446	2.39951e-16	2.99755	0.00327904	0.273774	-1.8242
GAS2L1	0.233697	3.65299e-16	2.99515	0.00330317	0.274113	-1.83024
C1orf162	0.571066	2.93672e-16	2.99209	0.00333424	0.275853	-1.83797
LAMA2	0.491708	1.71906e-16	2.9908	0.00334743	0.276107	-1.84122
PCDH17	0.312241	1.46836e-16	2.98859	0.0033701	0.27714	-1.84679
LAPTM5	0.44909	-3.65299e-16	2.98528	0.0034043	0.279111	-1.85512
PARD6G	0.242665	-1.61161e-16	2.977	0.00349129	0.284287	-1.87592
C3AR1	0.446863	-1.11022e-16	2.97543	0.00350796	0.284287	-1.87985
CNTN4	0.323876	-1.07441e-16	2.97533	0.00350908	0.284287	-1.88011
LOX	0.624224	-8.23714e-17	2.97398	0.00352351	0.284486	-1.88349
SERPINE1	0.594701	-3.50974e-16	2.97106	0.00355496	0.285463	-1.89081
NFIC	0.236629	1.07441e-17	2.96848	0.00358294	0.286866	-1.89728
CHST1	0.220196	-2.86509e-16	2.96329	0.00363982	0.289972	-1.91025
CSGALNACT1	0.318358	1.86231e-16	2.96213	0.00365265	0.289972	-1.91315
GPC6	0.211501	6.08832e-17	2.9614	0.00366075	0.289972	-1.91497
ZBTB7C	0.378114	1.86231e-16	2.96001	0.00367625	0.290084	-1.91846
S100A8	0.589872	1.62952e-16	2.95826	0.00369582	0.290788	-1.92283
TGFBR1	0.336862	-2.04138e-16	2.9554	0.00372795	0.292473	-1.92996
WAS	0.347822	-1.0386e-16	2.95047	0.00378394	0.296005	-1.94223
ABCA2	0.261335	1.79068e-16	2.94954	0.00379466	0.296005	-1.94456
SGCB	0.489241	1.36092e-16	2.94594	0.00383623	0.297799	-1.95353
TTTY5	0.260603	-1.79068e-16	2.94566	0.00383947	0.297799	-1.95422
SLC23A2	0.274156	2.75765e-16	2.94285	0.00387209	0.298661	-1.96119
NUAK1	0.370202	-2.72184e-16	2.93742	0.00393612	0.299615	-1.97468
SPP1	1.1382	-3.29486e-16	2.93653	0.00394667	0.299615	-1.97688
FAP	0.866824	-1.07441e-16	2.93619	0.00395068	0.299615	-1.97772
PLXND1	0.410821	8.95341e-17	2.93101	0.00401281	0.302582	-1.99056
NPTN	0.413601	2.3637e-16	2.93017	0.00402305	0.302582	-1.99265
NCF1B	0.335326	3.43811e-16	2.9267	0.00406524	0.303283	-2.00123
OR13D2P	0.184611	1.36092e-16	2.92576	0.0040768	0.303283	-2.00357
CNTLN	0.323874	2.50696e-16	2.92481	0.00408843	0.303322	-2.00591
KRTAP12-2	0.270339	-4.01113e-16	2.92308	0.00410976	0.304078	-2.01019
BMP6	0.326861	1.14604e-16	2.92012	0.00414637	0.304312	-2.01748
STOML1	0.280242	2.29207e-16	2.9179	0.00417413	0.304712	-2.02296
CNTNAP3P2	0.443751	2.43533e-16	2.91501	0.00421046	0.305729	-2.03009
ITPRIP	0.230034	7.16273e-18	2.91097	0.00426184	0.307491	-2.04005
SNX11	0.220621	5.73018e-17	2.91044	0.00426852	0.307491	-2.04134
SGIP1	0.561364	4.11857e-16	2.90761	0.00430486	0.307674	-2.04831
RUNX1	0.619781	3.22323e-16	2.89827	0.00442686	0.313928	-2.07126
NEUROG1	0.240942	5.37205e-17	2.89716	0.00444151	0.314151	-2.07398
KCNQ5-IT1	0.251728	-1.86231e-16	2.89402	0.00448331	0.316288	-2.08167
A2M	0.552307	-3.00835e-16	2.88611	0.00459032	0.321346	-2.10103
ST6GALNAC1	0.579507	1.07441e-17	2.88409	0.00461796	0.322151	-2.10595
ACTG2	0.267071	3.65299e-16	2.8789	0.00468978	0.324153	-2.11862
RBMS2	0.435118	-1.3251e-16	2.8733	0.0047685	0.32711	-2.13227
AQP9	0.383167	-1.39673e-16	2.86683	0.00486079	0.332605	-2.14799
COX7A1	0.29566	3.36648e-16	2.8655	0.00487996	0.333082	-2.15122
WDR19	0.346026	3.25904e-16	2.86314	0.00491429	0.333747	-2.15696
NBEAP1	0.511666	-3.58136e-17	2.86186	0.00493285	0.333747	-2.16005
DCHS1	0.406611	3.58136e-17	2.8618	0.00493375	0.333747	-2.16021
KLF9	0.314485	-1.93394e-16	2.86063	0.00495084	0.333747	-2.16304
ACKR1	0.319773	3.29486e-16	2.85878	0.004978	0.334134	-2.16752
CLN8	0.29884	-2.07719e-16	2.85858	0.00498105	0.334134	-2.16802
FABP12P1	0.199969	-1.3072e-16	2.8571	0.00500284	0.334551	-2.1716
PTPRM	0.623607	1.28929e-16	2.8565	0.00501177	0.334551	-2.17306
PCSK1	0.51565	1.89812e-16	2.85426	0.00504493	0.335943	-2.17847
CNDP1	0.270714	1.18185e-16	2.84845	0.00513222	0.338186	-2.19252
CFAP44-AS1	0.178973	-3.58136e-18	2.84738	0.00514854	0.338186	-2.19512
P2RY13	0.351489	-1.00278e-16	2.84657	0.00516084	0.338186	-2.19708
GLULP3	0.338103	-3.04416e-16	2.84624	0.00516579	0.338186	-2.19786
ENTPD1	0.283482	-3.22323e-16	2.84518	0.00518201	0.338186	-2.20043
TRBV21OR9-2	0.238356	3.58136e-18	2.84465	0.00519009	0.338186	-2.2017
PTGER2	0.321306	-2.93672e-16	2.84202	0.00523039	0.338936	-2.20804
CTSL	0.236459	-1.75487e-16	2.84022	0.00525827	0.338936	-2.21239
RBPMS	0.552461	-8.59528e-16	2.83687	0.00531025	0.338936	-2.22045
CCDC88A	0.430877	-4.29764e-17	2.83507	0.00533842	0.338936	-2.22478
DYRK4	0.298875	1.07441e-16	2.83257	0.00537783	0.338936	-2.2308
AKT3	0.382977	1.50417e-16	2.83182	0.00538965	0.338936	-2.23259
PDLIM5	0.358352	-4.29764e-17	2.83105	0.00540192	0.338936	-2.23445
CRYAB	0.456605	2.54277e-16	2.83092	0.00540396	0.338936	-2.23476
FCGR2C	0.44762	2.07719e-16	2.82851	0.00544241	0.338936	-2.24056
CMA1	0.208327	1.14604e-16	2.82722	0.00546292	0.338936	-2.24364
CHI3L1	0.383563	6.44646e-17	2.82512	0.0054967	0.338936	-2.24869
PIK3R5	0.323253	2.86509e-16	2.82489	0.00550051	0.338936	-2.24925
PPP1R3C	0.243011	1.79068e-16	2.82483	0.00550139	0.338936	-2.24938
CPXM2	0.358438	1.64743e-16	2.82369	0.00551991	0.338936	-2.25213
IGFBP2	0.33252	3.07997e-16	2.82267	0.00553636	0.338936	-2.25457
GNE	0.29435	8.95341e-17	2.82261	0.00553728	0.338936	-2.2547
SNORD114-20	0.402284	1.8265e-16	2.82255	0.00553825	0.338936	-2.25485
RAP1GAP	0.613729	-1.96975e-16	2.81987	0.0055819	0.338936	-2.26127
COLEC12	0.630308	-1.64743e-16	2.81951	0.00558786	0.338936	-2.26214
USP32P1	0.368326	-1.96975e-16	2.81884	0.00559887	0.338936	-2.26375
TRIM43CP	0.21997	4.33345e-16	2.81443	0.00567152	0.340737	-2.27429
FILIP1L	0.628023	-8.95341e-17	2.81401	0.00567854	0.340737	-2.2753
PTGS1	0.262381	3.83206e-16	2.80917	0.00575937	0.344075	-2.28686
HDLBP	0.376672	1.79068e-16	2.80588	0.00581489	0.345016	-2.2947
FRMD6	0.391614	3.54555e-16	2.80525	0.00582566	0.345016	-2.29621
THBS1	0.422395	-1.71906e-16	2.79999	0.00591564	0.348682	-2.30874
UBE2Q2P11	0.238763	-1.96975e-16	2.79913	0.00593052	0.348682	-2.31079
AUH	0.18712	-3.43811e-16	2.79905	0.00593192	0.348682	-2.31098
HECW1-IT1	0.278837	-7.16273e-17	2.79866	0.00593865	0.348682	-2.31191
CSRP1	0.445321	-5.73018e-17	2.79539	0.00599535	0.350461	-2.31967
NAV1	0.479658	-2.22045e-16	2.79518	0.00599914	0.350461	-2.32019
COL24A1	0.387754	-2.25626e-16	2.79389	0.00602159	0.350536	-2.32324
MEG3	0.335489	-3.65299e-16	2.78899	0.00610808	0.352283	-2.33488
MTMR9LP	0.199005	-2.72184e-16	2.78852	0.0061163	0.352283	-2.33598
SERPINH1P1	0.323011	1.43255e-16	2.78807	0.00612442	0.352283	-2.33707
NAV3	0.261219	-4.65577e-17	2.78459	0.0061866	0.35319	-2.34531
RAB5B	0.2939	3.43811e-16	2.78415	0.00619453	0.35319	-2.34636
TET2	0.312809	-1.96975e-16	2.78333	0.00620925	0.35319	-2.34829
FST	0.24565	-8.95341e-17	2.78247	0.00622468	0.35319	-2.35032
RASSF5	0.27778	8.59528e-17	2.78229	0.00622796	0.35319	-2.35075
TTBK2	0.360532	1.79068e-17	2.78221	0.00622935	0.35319	-2.35093
CR2	0.457707	2.86509e-17	2.78038	0.00626253	0.35319	-2.35527
ZBTB8A	0.287629	-6.62552e-17	2.7797	0.00627501	0.35319	-2.35689
SDC2	0.359904	5.73018e-17	2.77853	0.0062962	0.35319	-2.35964
POU2F2	0.338594	2.65021e-16	2.77832	0.00630003	0.35319	-2.36014
TCF21	0.278634	4.15438e-16	2.77397	0.00637986	0.356202	-2.37041
PILRA	0.324223	-7.16273e-18	2.77172	0.00642151	0.357637	-2.37572
BACE2	0.349325	2.18463e-16	2.77112	0.0064328	0.357637	-2.37716
GSN	0.325057	1.50417e-16	2.76525	0.00654269	0.36233	-2.39097
SNORD113-3	0.380798	3.9395e-16	2.76051	0.00663291	0.365923	-2.40214
HSPB8	0.275329	-2.86509e-17	2.76043	0.00663439	0.365923	-2.40232
SLC12A8	0.447382	2.04138e-16	2.7588	0.00666561	0.366904	-2.40615
PXDN	0.227995	3.07997e-16	2.7564	0.00671193	0.36871	-2.41179
IGKV2D-10	0.21143	2.93672e-16	2.75355	0.00676726	0.370092	-2.41848
SFRP1	0.392705	6.44646e-17	2.75301	0.00677774	0.370092	-2.41974
TFF1	1.19038	2.90091e-16	2.75152	0.00680698	0.370474	-2.42325
LYNX1	0.322573	3.1516e-16	2.75049	0.00682719	0.370568	-2.42566
SNORD113-6	0.324821	1.79068e-16	2.74602	0.00691534	0.37383	-2.43612
SLITRK6	0.465422	-5.73018e-17	2.74468	0.00694205	0.37383	-2.43926
ECE2	0.236151	4.15438e-16	2.74249	0.00698574	0.375443	-2.44437
GRB2	0.228952	-1.8265e-16	2.74145	0.0070067	0.375829	-2.4468
SPI1	0.349444	3.9395e-17	2.7381	0.00707435	0.378713	-2.45463
OR6C69P	0.198172	-1.79068e-17	2.734	0.00715806	0.380681	-2.46421
FXYD6P3	0.227124	-3.4023e-16	2.73374	0.00716338	0.380681	-2.46481
HGD	0.431248	-4.65577e-17	2.73207	0.00719774	0.380681	-2.4687
KLHL2	0.286516	1.0386e-16	2.73174	0.00720445	0.380681	-2.46946
ARRB2	0.273141	-3.00835e-16	2.7314	0.00721155	0.380681	-2.47027
C1S	0.592185	-1.07441e-16	2.72907	0.00725962	0.380681	-2.47567
MS4A4E	0.321179	-4.65577e-17	2.72839	0.00727384	0.380681	-2.47726
XBP1	0.303753	4.29764e-16	2.72835	0.00727475	0.380681	-2.47737
RBMS1P1	0.332691	7.16273e-17	2.72796	0.00728274	0.380681	-2.47826
COL6A2	0.360229	-1.43255e-16	2.72667	0.00730969	0.380681	-2.48126
DEFB134	0.216036	-1.8265e-16	2.72555	0.00733316	0.380681	-2.48387
LXN	0.503387	2.02347e-16	2.72513	0.00734185	0.380681	-2.48484
ITIH3	0.231944	-5.01391e-17	2.72449	0.00735542	0.380681	-2.48634
ADGRA2	0.330117	-8.23714e-17	2.72351	0.00737602	0.380681	-2.48861
SMYD1	0.2249	-1.21766e-16	2.72096	0.00742981	0.382733	-2.49452
CD83	0.281921	-2.14882e-17	2.71912	0.00746888	0.383502	-2.49879
PCDHB10	0.270124	-1.5758e-16	2.71828	0.00748688	0.383502	-2.50075
SLC24A3	0.305593	3.9395e-16	2.71359	0.00758763	0.386339	-2.51162
SDHA	0.239683	1.43255e-16	2.71346	0.00759041	0.386339	-2.51191
MAN2B1	0.315943	-2.29207e-16	2.71173	0.00762786	0.386339	-2.51591
NNMT	0.332019	-1.28929e-16	2.71122	0.00763912	0.386339	-2.51711
CD99	0.355346	7.37761e-16	2.71061	0.00765242	0.386339	-2.51853
TRBV6-5	0.229225	-1.64743e-16	2.70766	0.00771684	0.388718	-2.52534
FLJ42393	0.282093	-2.86509e-17	2.70458	0.00778462	0.390691	-2.53245
IGKV2D-29	0.243862	1.43255e-16	2.70079	0.00786892	0.393475	-2.5412
PPP1R18	0.418369	1.89812e-16	2.69899	0.00790918	0.394045	-2.54534
EVL	0.437307	-1.21766e-16	2.69767	0.00793901	0.394395	-2.5484
NPS	0.224508	1.61161e-16	2.6974	0.0079451	0.394395	-2.54902
SNORA63	0.482268	3.33067e-16	2.69454	0.0080097	0.396861	-2.5556
PDGFRA	0.576471	-1.43255e-17	2.69343	0.0080349	0.396861	-2.55815
ZNF319	0.216401	-2.93672e-16	2.69276	0.00805022	0.396861	-2.5597
CAMK2D	0.444511	7.52087e-17	2.69104	0.00808939	0.396861	-2.56364
SVEP1	0.289369	3.1516e-16	2.69102	0.00808991	0.396861	-2.56369
PRKCB	0.426147	1.3072e-16	2.69073	0.00809653	0.396861	-2.56436
CRTC3	0.305477	3.36648e-16	2.68859	0.00814577	0.397807	-2.56928
C1R	0.392805	1.3251e-16	2.68768	0.0081667	0.397807	-2.57136
PBX3	0.472412	1.25348e-16	2.68736	0.00817412	0.397807	-2.5721
S100A9	0.413313	-2.79346e-16	2.6866	0.0081919	0.397963	-2.57386
CTAGE7P	0.186161	5.37205e-18	2.6859	0.00820792	0.398033	-2.57545
CD109	0.366021	2.14882e-16	2.68366	0.00826025	0.399861	-2.58061
ITGAM	0.311428	-4.65577e-17	2.68109	0.00832042	0.40135	-2.5865
FOXP1	0.532447	-4.29764e-17	2.67754	0.0084041	0.402566	-2.59462
DIO2	0.22448	1.71906e-16	2.67647	0.00842966	0.402566	-2.59708
RYR2	0.31173	1.79068e-16	2.67496	0.00846551	0.402566	-2.60052
HLA-DRB1	0.356181	-1.93394e-16	2.67466	0.00847272	0.402566	-2.60121
FCGR2A	0.464641	1.25348e-16	2.6735	0.00850034	0.402566	-2.60385
NEFM	0.225597	-2.0951e-16	2.67044	0.00857392	0.404292	-2.61084
TMEM185A	0.243768	-2.93672e-16	2.66881	0.00861341	0.405454	-2.61457
ELK3	0.248337	-2.11301e-16	2.66644	0.00867118	0.407471	-2.61999
IL16	0.272159	3.22323e-17	2.6636	0.00874053	0.408932	-2.62644
ARHGAP9	0.253376	-1.5758e-16	2.66278	0.00876085	0.408932	-2.62833
ITGB7	0.244816	2.22045e-16	2.66272	0.00876218	0.408932	-2.62845
UBE2Q2L	0.263544	-4.29764e-17	2.65804	0.0088782	0.411532	-2.63911
MFAP4	0.316243	1.50417e-16	2.65189	0.00903269	0.416496	-2.65308
SERTAD4	0.246331	-2.18463e-16	2.65098	0.00905557	0.416496	-2.65513
TECRP2	0.254956	-9.66968e-17	2.65059	0.00906566	0.416496	-2.65604
EFEMP2	0.30005	-1.68324e-16	2.63821	0.00938481	0.428468	-2.68404
EPGN	0.214483	-1.39673e-16	2.63576	0.00944933	0.429261	-2.68959
CLCA1	0.955283	4.33345e-16	2.63437	0.00948605	0.429362	-2.69273
TIMP1	0.5689	2.07719e-16	2.63377	0.00950197	0.429362	-2.69408
KCNG2	0.229962	-1.28929e-16	2.63253	0.00953485	0.429362	-2.69688
BACE2-IT1	0.493697	7.879e-17	2.63211	0.00954592	0.429362	-2.69782
TMEM263	0.245907	-4.36926e-16	2.6252	0.00973152	0.435557	-2.71339
PLPP4	0.415204	2.3637e-16	2.62436	0.00975411	0.435702	-2.71527
C1orf198	0.285514	-1.11022e-16	2.62181	0.00982345	0.436683	-2.72099
COX6CP11	0.233728	-3.18741e-16	2.62123	0.00983931	0.436683	-2.7223
PHLDB2	0.418306	6.44646e-17	2.61793	0.00992989	0.436683	-2.7297
DTNA	0.359434	-1.89812e-16	2.61752	0.00994144	0.436683	-2.73064
ST8SIA1	0.251864	5.37205e-17	2.61712	0.00995248	0.436683	-2.73154
RSU1P3	0.312436	3.25904e-16	2.61668	0.00996461	0.436683	-2.73252
WIPI1	0.330172	-2.6144e-16	2.61559	0.00999459	0.437295	-2.73495
CACNA2D1	0.24692	-1.16394e-16	2.61386	0.0100427	0.437997	-2.73883
FAM149A	0.267586	3.97531e-16	2.60964	0.0101611	0.440274	-2.7483
COL8A1	0.262785	-1.5758e-16	2.60912	0.0101755	0.440274	-2.74945
FNBP1	0.317634	-4.01113e-16	2.60785	0.0102113	0.44036	-2.75228
TGFB3	0.601697	3.47392e-16	2.60677	0.0102421	0.44036	-2.75471
DSE	0.370844	3.29486e-16	2.60412	0.0103173	0.441645	-2.76062
PLCL2-AS1	0.196959	6.62552e-17	2.6041	0.010318	0.441645	-2.76068
MSR1	0.328805	1.18185e-16	2.60022	0.0104291	0.445151	-2.76932
MED9	0.207326	-6.44646e-17	2.59759	0.0105053	0.446754	-2.7752
ZNF667-AS1	0.187572	2.3637e-16	2.59538	0.0105695	0.448089	-2.78012
AGR2	0.949368	-3.65299e-16	2.59419	0.0106043	0.448864	-2.78276
ADGRL4	0.372415	0	2.59242	0.0106561	0.450359	-2.7867
SCG5	0.580773	-1.14604e-16	2.58298	0.0109369	0.457972	-2.80768
ARIH2OS	0.242806	-1.43255e-16	2.5821	0.0109631	0.45837	-2.80961
ZNF382	0.299148	1.75487e-16	2.5782	0.0110813	0.46119	-2.81825
ZDHHC15	0.361502	-7.3418e-17	2.57715	0.0111132	0.461664	-2.82057
KANSL1L	0.441356	1.18185e-16	2.57641	0.0111359	0.461664	-2.82222
PYGO1	0.310457	2.18463e-16	2.57617	0.0111434	0.461664	-2.82276
SLC30A4	0.316359	-3.54555e-16	2.5682	0.0113895	0.466901	-2.84036
RUNX1T1	0.325793	-1.43255e-17	2.56758	0.0114088	0.466991	-2.84172
BIN3	0.28591	1.96975e-16	2.56549	0.0114741	0.467563	-2.84632
AKR1B1P8	0.20759	2.14882e-16	2.5653	0.0114801	0.467563	-2.84674
FUT8	0.322848	6.44646e-17	2.56516	0.0114845	0.467563	-2.84705
SSPN	0.583417	3.83206e-16	2.56349	0.011537	0.468724	-2.85072
SRGAP2C	0.448978	1.18185e-16	2.55934	0.0116687	0.46948	-2.85986
IGHV3-25	0.220517	2.43533e-16	2.55851	0.0116954	0.46948	-2.8617
PTPRN	0.184798	-5.73018e-17	2.55671	0.0117528	0.46948	-2.86564
KLF7P1	0.193566	1.21766e-16	2.55614	0.0117712	0.46948	-2.8669
PLPPR1	0.269842	-7.69993e-17	2.5561	0.0117724	0.46948	-2.86698
TMEM47	0.333607	1.43255e-17	2.55589	0.0117791	0.46948	-2.86744
UBE2E2	0.369235	2.97253e-16	2.55191	0.0119076	0.473909	-2.87617
CD248	0.399157	-4.01113e-16	2.54818	0.0120292	0.477791	-2.88435
DMTN	0.233984	-2.25626e-16	2.54571	0.0121106	0.477791	-2.88977
WWC2	0.289868	3.33067e-16	2.54565	0.0121126	0.477791	-2.88991
GIMAP1-GIMAP5	0.214743	-2.57858e-16	2.54562	0.0121137	0.477791	-2.88998
HABP4	0.269504	-3.29486e-16	2.54519	0.0121277	0.477791	-2.8909
MAB21L2	0.528504	-4.1902e-16	2.54317	0.0121946	0.479127	-2.89533
CYCSP24	0.216347	9.31155e-17	2.54238	0.0122209	0.479389	-2.89706
RELL1	0.263595	1.86231e-16	2.53994	0.0123021	0.480743	-2.90239
ADAMTSL4	0.225807	-3.9395e-17	2.53494	0.0124703	0.481259	-2.9133
SHISA2	0.254135	3.58136e-18	2.53465	0.0124801	0.481259	-2.91394
AQP3	0.318533	3.43811e-16	2.53374	0.0125108	0.481761	-2.91591
SCRG1	0.333854	-1.59371e-16	2.53226	0.0125611	0.482422	-2.91913
ZNF602P	0.182964	-1.89812e-16	2.5322	0.0125633	0.482422	-2.91927
ATXN1	0.29708	1.71906e-16	2.53132	0.0125931	0.48289	-2.92118
LPAR1	0.37196	-2.50696e-16	2.52584	0.0127814	0.483214	-2.9331
CTXN3	0.202521	1.96975e-16	2.52438	0.0128321	0.483214	-2.93628
KLK14	0.210847	2.07719e-16	2.52353	0.0128615	0.483214	-2.93812
SETBP1	0.313129	-3.97531e-16	2.52274	0.0128889	0.483214	-2.93983
ATOH1	0.522841	3.18741e-16	2.5224	0.0129008	0.483214	-2.94057
PRSS2	0.479638	-1.96975e-16	2.52229	0.0129046	0.483214	-2.9408
DLC1	0.271452	2.54277e-16	2.51968	0.0129963	0.485219	-2.94649
NOX4	0.336904	-2.18463e-16	2.5193	0.0130093	0.485219	-2.94729
SIRT3	0.175445	-2.72184e-16	2.51658	0.0131052	0.485925	-2.95318
CNN3	0.454391	-3.79625e-16	2.5161	0.0131223	0.485925	-2.95423
CDH11	0.289873	1.00278e-16	2.51513	0.0131569	0.485925	-2.95634
BCAT1	0.323877	2.07719e-16	2.51435	0.0131845	0.485925	-2.95803
DLL4	0.211816	2.90091e-16	2.51424	0.0131885	0.485925	-2.95827
YIPF5	0.246414	3.4023e-16	2.51374	0.0132062	0.485925	-2.95935
RBMS3	0.35776	-3.54555e-16	2.51102	0.0133032	0.488401	-2.96522
FLNA	0.362397	2.29207e-16	2.51085	0.0133093	0.488401	-2.96559
DRAXIN	0.212999	-3.4023e-16	2.50937	0.0133627	0.489047	-2.9688
KCNA1	0.270713	2.18463e-16	2.50573	0.0134942	0.491773	-2.97666
AK1	0.283557	-1.50417e-16	2.50411	0.013553	0.492707	-2.98014
RANBP20P	0.242437	-1.8265e-16	2.50108	0.0136638	0.493929	-2.98667
EDNRA	0.53582	-3.36648e-16	2.50033	0.0136913	0.493929	-2.98829
ANXA6	0.240539	-9.31155e-17	2.49887	0.0137453	0.493929	-2.99144
COL1A1	0.36481	-7.879e-17	2.49881	0.0137477	0.493929	-2.99158
SLC12A6	0.292968	1.79068e-16	2.49876	0.0137494	0.493929	-2.99168
KLHL5	0.337242	4.29764e-16	2.49497	0.0138899	0.497963	-2.99982
PLD1	0.293626	-8.59528e-17	2.48823	0.014143	0.500907	-3.01429
CERCAM	0.28671	2.54277e-16	2.4873	0.0141782	0.500907	-3.01628
FAT4	0.286429	-3.58136e-17	2.48592	0.0142306	0.500907	-3.01924
TAL1	0.242299	5.73018e-17	2.48465	0.0142794	0.500907	-3.02198
GJB2	0.441792	3.58136e-17	2.48456	0.0142827	0.500907	-3.02217
TNXB	0.21603	-2.75765e-16	2.48401	0.0143037	0.500907	-3.02334
MTNR1B	0.228267	7.879e-17	2.48338	0.0143277	0.500907	-3.02468
CTF2P	0.208488	1.46836e-16	2.48193	0.0143834	0.500907	-3.02779
SEC23A	0.303872	-4.04694e-16	2.48172	0.0143914	0.500907	-3.02823
GLUL	0.371271	1.07441e-16	2.48157	0.0143971	0.500907	-3.02855
JAM3	0.347009	-1.79068e-16	2.4807	0.0144309	0.500907	-3.03043
LAMA1	0.22785	1.09232e-16	2.4799	0.0144618	0.500907	-3.03214
CFAP54	0.405169	9.49062e-17	2.4791	0.0144925	0.500907	-3.03384
TBKBP1	0.224879	5.73018e-17	2.47788	0.0145397	0.500907	-3.03644
PTPN21	0.230347	6.62552e-17	2.47588	0.0146175	0.500907	-3.04071
S100A12	0.381263	1.88022e-16	2.4754	0.0146364	0.500907	-3.04175
AGBL5-IT1	0.148468	1.93394e-16	2.47482	0.0146592	0.500907	-3.04299
IL17RA	0.255082	-1.11022e-16	2.47323	0.0147212	0.501165	-3.04637
YTHDC2	0.160163	1.00278e-16	2.47059	0.0148251	0.504055	-3.052
UBA7	0.302437	-3.1516e-16	2.46913	0.0148831	0.504986	-3.05512
ULK4P3	0.318713	-9.66968e-17	2.46897	0.0148895	0.504986	-3.05546
CD74	0.376746	2.65021e-16	2.4673	0.0149556	0.506598	-3.05901
PTPRE	0.261887	-3.29486e-16	2.46462	0.0150626	0.508519	-3.06471
PDGFB	0.192485	3.00835e-16	2.46448	0.0150682	0.508519	-3.065
SLC18A2	0.223779	-1.79068e-16	2.46044	0.015231	0.510994	-3.07359
DLEC1	0.461703	-1.55789e-16	2.45991	0.0152524	0.510994	-3.07472
ACVR2A	0.291712	1.75487e-16	2.45983	0.0152556	0.510994	-3.07488
PLEKHO1	0.237853	-2.93672e-16	2.45971	0.0152603	0.510994	-3.07513
KCNK7	0.232099	2.47114e-16	2.45941	0.0152725	0.510994	-3.07577
PIAS3	0.38161	2.14882e-16	2.45847	0.0153109	0.511103	-3.07778
SLC7A4	0.215838	-2.86509e-17	2.45795	0.015332	0.511103	-3.07888
LYZ	0.707849	4.08276e-16	2.45741	0.0153541	0.511217	-3.08003
AOC2	0.209656	0	2.45575	0.0154216	0.512256	-3.08354
COX6CP14	0.225963	8.95341e-17	2.45496	0.0154542	0.512256	-3.08522
ARL4C	0.368846	-3.29486e-16	2.45234	0.0155618	0.51437	-3.09077
RNF112	0.222303	-1.43255e-16	2.45005	0.0156566	0.515629	-3.09562
CACNA1C-AS3	0.192993	1.96975e-16	2.44865	0.0157146	0.51674	-3.09857
HLA-DRA	0.434452	1.00278e-16	2.44832	0.0157282	0.51674	-3.09926
SIDT2	0.332123	-2.3637e-16	2.44578	0.0158344	0.517709	-3.10463
RPL23AP82	0.178261	-8.59528e-17	2.44548	0.0158468	0.517709	-3.10526
SSC5D	0.193911	3.1516e-16	2.44509	0.0158633	0.517709	-3.10609
CMTM3	0.311541	2.47114e-16	2.44379	0.0159177	0.51776	-3.10882
SLC22A12	0.175516	-2.00556e-16	2.4393	0.0161078	0.520445	-3.1183
GABBR1	0.32722	1.14604e-16	2.4386	0.0161376	0.520584	-3.11977
RARRES2	0.255365	3.72462e-16	2.4383	0.0161503	0.520584	-3.1204
HTR2A	0.28864	-1.21766e-16	2.43757	0.0161814	0.520974	-3.12194
FBLN2	0.246982	4.65577e-17	2.43699	0.0162061	0.521118	-3.12315
PDE11A	0.202879	3.58136e-17	2.43543	0.0162732	0.52208	-3.12645
IGHV1-14	0.214832	-4.08276e-16	2.43443	0.0163159	0.52251	-3.12854
GAS1	0.212744	-2.14882e-17	2.43398	0.0163352	0.52251	-3.12948
TRAJ41	0.531942	-1.28929e-16	2.4336	0.0163517	0.52251	-3.13029
NLGN3	0.252459	-3.58136e-17	2.43016	0.0165004	0.524872	-3.13751
AMIGO3	0.174092	-1.79068e-17	2.42712	0.0166331	0.526933	-3.14389
ANAPC13	0.288576	9.31155e-17	2.42481	0.0167344	0.526933	-3.14873
ITGBL1	0.378088	7.879e-17	2.42464	0.0167418	0.526933	-3.14908
ANKRD44-IT1	0.191504	5.01391e-17	2.42376	0.0167806	0.526933	-3.15093
SH3BGRL3	0.323767	-1.25348e-16	2.42204	0.0168567	0.527776	-3.15454
SNORD89	0.268379	-1.71906e-16	2.42061	0.01692	0.529152	-3.15753
COX5AP2	0.235217	9.31155e-17	2.41856	0.0170113	0.529516	-3.16181
ABLIM3	0.285127	-2.14882e-16	2.41842	0.0170173	0.529516	-3.1621
RFX4	0.171226	-1.39673e-16	2.41474	0.0171827	0.529516	-3.1698
PODXL	0.236979	-1.64743e-16	2.41343	0.0172417	0.529516	-3.17253
LRRC15	0.311867	-4.22601e-16	2.41326	0.0172494	0.529516	-3.17289
BLK	0.179989	1.43255e-17	2.41305	0.0172587	0.529516	-3.17331
SFTA3	0.271838	1.96975e-16	2.41232	0.0172919	0.529516	-3.17484
HCAR1	0.193994	-2.50696e-17	2.41206	0.0173035	0.529516	-3.17538
GNG2	0.353232	-4.44089e-16	2.41176	0.0173172	0.529516	-3.17601
SMO	0.216486	-3.00835e-16	2.41171	0.0173195	0.529516	-3.17612
GRIK3	0.168769	-7.879e-17	2.41076	0.0173625	0.529644	-3.17809
PTPN14	0.284404	-5.73018e-17	2.40945	0.0174222	0.530873	-3.18082
SORBS2	0.536024	-1.46836e-16	2.40878	0.0174529	0.530889	-3.18222
EGR2	0.245508	1.75487e-16	2.40728	0.0175215	0.531578	-3.18535
RNF144A	0.285432	2.6144e-16	2.40503	0.017625	0.531632	-3.19003
MRC1	0.335802	1.00278e-16	2.40466	0.0176419	0.531632	-3.1908
OR2H4P	0.225108	-2.18463e-16	2.40321	0.0177089	0.532438	-3.19381
SNORD113-4	0.462044	-2.00556e-16	2.40313	0.0177126	0.532438	-3.19398
AMER1	0.204538	-2.3637e-16	2.40281	0.0177271	0.532438	-3.19463
EGFL7	0.182634	-3.9395e-16	2.40056	0.0178318	0.534406	-3.19932
SLC11A1	0.261241	3.61718e-16	2.39938	0.0178867	0.534664	-3.20176
CRIP1P2	0.222118	5.01391e-17	2.39841	0.0179319	0.534664	-3.20377
PPP2R5B	0.203633	0	2.39792	0.0179548	0.534664	-3.20479
PREX1	0.479801	-2.29207e-16	2.3978	0.0179608	0.534664	-3.20505
EPO	0.189695	1.25348e-16	2.39764	0.017968	0.534664	-3.20537
GJA5	0.19804	-8.95341e-17	2.39553	0.018067	0.536741	-3.20974
CD55	0.767313	-8.30877e-16	2.39473	0.0181051	0.537288	-3.21141
PEG3	0.206525	3.25904e-16	2.39414	0.0181329	0.537528	-3.21263
EFEMP1	0.54319	3.9395e-17	2.39203	0.0182324	0.538493	-3.21698
HMGN1P9	0.200108	-1.02069e-16	2.38987	0.0183353	0.538934	-3.22146
LTBP2	0.225877	2.50696e-16	2.38898	0.0183777	0.538934	-3.22329
OR7E86P	0.179274	9.66968e-17	2.3872	0.0184632	0.539539	-3.22698
EMX2OS	0.19114	-2.25626e-16	2.38711	0.0184675	0.539539	-3.22717
GNA14	0.278493	3.79625e-16	2.38588	0.0185264	0.539539	-3.2297
KCNMB1	0.233366	-7.879e-17	2.3845	0.0185931	0.539539	-3.23256
BCL3	0.262868	-2.43533e-16	2.3821	0.0187094	0.539539	-3.23751
GPR148	0.189082	5.01391e-17	2.38201	0.0187138	0.539539	-3.23769
ATF7IP	0.309654	1.43255e-17	2.3817	0.0187289	0.539539	-3.23834
ANKRD44	0.309668	3.36648e-16	2.38101	0.0187621	0.539539	-3.23974
PRND	0.19037	2.11301e-16	2.3809	0.0187678	0.539539	-3.23998
VTRNA1-1	0.393012	2.29207e-16	2.38087	0.0187694	0.539539	-3.24005
SLC39A11	0.241054	-4.40508e-16	2.38051	0.0187867	0.539539	-3.24078
VCAN	0.544899	2.14882e-16	2.37838	0.0188905	0.539714	-3.24516
NR2F1-AS1	0.3608	-1.11022e-16	2.37765	0.0189267	0.539714	-3.24668
RFTN1	0.359203	-3.65299e-16	2.37624	0.0189958	0.540233	-3.24958
MTND5P5	0.352082	1.18185e-16	2.37527	0.0190437	0.541032	-3.25158
FCGR1B	0.228976	1.14604e-16	2.37482	0.0190657	0.541093	-3.25249
RPS6KC1	0.210893	2.07719e-16	2.37193	0.0192089	0.542899	-3.25843
ROR2	0.340325	-1.00278e-16	2.37071	0.0192697	0.544054	-3.26094
MSRB3	0.262698	9.31155e-17	2.3692	0.019345	0.544343	-3.26403
OR51AB1P	0.187406	9.49062e-17	2.36799	0.0194059	0.544343	-3.26653
RASSF2	0.299721	-1.28929e-16	2.36748	0.0194313	0.544343	-3.26757
ASMTL	0.192624	-2.3637e-16	2.3655	0.0195309	0.545227	-3.27162
FCER1G	0.53706	-4.22601e-16	2.36389	0.0196124	0.54637	-3.27492
CDH13	0.236066	-1.46836e-16	2.3635	0.0196318	0.54637	-3.27571
ATP2A3	0.375739	3.9395e-17	2.36107	0.0197556	0.547427	-3.2807
EVI2A	0.439412	3.25904e-16	2.36027	0.0197964	0.547427	-3.28233
MT1G	0.290853	3.58136e-17	2.36024	0.0197976	0.547427	-3.28238
HIF1AP1	0.188296	1.88022e-16	2.35881	0.0198709	0.547427	-3.28531
MCC	0.249139	-1.64743e-16	2.35686	0.0199713	0.548361	-3.2893
MEIS1	0.355662	-3.43811e-16	2.35494	0.0200701	0.550153	-3.29321
IFNA16	0.190439	-1.8265e-16	2.35348	0.0201459	0.551125	-3.2962
ADGRF5	0.351574	-1.43255e-17	2.35105	0.0202718	0.553461	-3.30114
KIAA0825	0.293308	-1.79068e-17	2.35016	0.0203181	0.554098	-3.30295
SMAD7	0.305285	2.14882e-16	2.34907	0.0203755	0.554098	-3.30518
IGFBP4	0.213109	8.95341e-17	2.34829	0.0204161	0.554098	-3.30676
SNORD114-23	0.184286	5.90925e-17	2.34828	0.0204169	0.554098	-3.30679
C3orf70	0.222065	2.72184e-16	2.3473	0.0204684	0.554592	-3.30879
IFT80	0.267432	-5.01391e-17	2.34677	0.0204961	0.554592	-3.30986
MTFR1L	0.301906	-1.00278e-16	2.34488	0.020596	0.555343	-3.31371
TLR1	0.344864	-1.79068e-16	2.34372	0.020657	0.555343	-3.31605
CYBB	0.25475	3.58136e-16	2.34334	0.0206776	0.555343	-3.31684
IFFO1	0.174001	2.50696e-16	2.34321	0.0206844	0.555343	-3.3171
COL27A1	0.352366	1.93394e-16	2.34306	0.020692	0.555343	-3.31739
IMPA2	0.216649	-3.43811e-16	2.34271	0.020711	0.555343	-3.31812
CHST15	0.334779	3.22323e-16	2.3387	0.0209246	0.555837	-3.32624
AIF1	0.445851	1.43255e-16	2.33862	0.0209289	0.555837	-3.3264
MTCYBP14	0.162873	-7.3418e-17	2.33772	0.0209774	0.556584	-3.32823
CXCL5	0.481905	2.57858e-16	2.33731	0.0209992	0.556622	-3.32906
COL5A2	0.198552	2.22045e-16	2.33646	0.021045	0.556967	-3.33078
NPL	0.294731	1.61161e-16	2.33625	0.0210563	0.556967	-3.3312
PIP4K2A	0.377982	3.58136e-18	2.33461	0.0211453	0.556967	-3.33454
ITPKA	0.208103	2.00556e-16	2.33265	0.0212515	0.556967	-3.33851
RNF144B	0.2354	-1.18185e-16	2.33238	0.0212661	0.556967	-3.33905
FAM171A2	0.167102	2.3637e-16	2.3316	0.0213083	0.556967	-3.34062
LIMS2	0.285047	1.79068e-17	2.33093	0.0213447	0.556967	-3.34197
CDC42SE1	0.292866	3.65299e-16	2.32987	0.0214027	0.556967	-3.34411
HIP1	0.232548	-2.07719e-16	2.3284	0.0214832	0.557076	-3.34708
GIMAP8	0.187911	8.23714e-17	2.32836	0.0214856	0.557076	-3.34717
TCN1	0.933998	-7.16273e-18	2.32772	0.0215208	0.557457	-3.34846
GOLGA8J	0.203512	7.52087e-17	2.32469	0.0216878	0.560043	-3.35458
NECAP1P2	0.162272	-1.00278e-16	2.32405	0.0217232	0.560043	-3.35587
GFPT2	0.332656	1.79068e-16	2.32361	0.0217476	0.560145	-3.35676
SMAP2	0.33513	-4.22601e-16	2.32088	0.0218995	0.562552	-3.36226
GUSBP11	0.188093	4.08276e-16	2.32082	0.0219029	0.562552	-3.36238
DPT	0.436249	1.68324e-16	2.32037	0.0219279	0.562665	-3.36328
AXL	0.235261	2.39951e-16	2.31988	0.0219551	0.562715	-3.36426
CFH	0.211393	2.07719e-16	2.3196	0.0219711	0.562715	-3.36483
PRTG	0.166502	-1.18185e-16	2.31893	0.0220083	0.563141	-3.36617
DBR1	0.223859	-4.44089e-16	2.31794	0.0220638	0.564032	-3.36816
HIF1A	0.550932	-4.26182e-16	2.31753	0.0220874	0.564106	-3.36901
RHBDL3	0.203072	2.54277e-16	2.31631	0.0221557	0.564987	-3.37145
CFI	0.259256	2.86509e-16	2.31492	0.0222342	0.566267	-3.37424
SFTPC	0.190523	1.5758e-16	2.31301	0.0223425	0.567436	-3.37808
RASGRP4	0.17469	4.29764e-17	2.31218	0.02239	0.568115	-3.37975
MASP1	0.280098	1.28929e-16	2.3112	0.0224453	0.568462	-3.3817
TDRG1	0.193616	6.44646e-17	2.31026	0.0224993	0.568881	-3.3836
TTLL11-IT1	0.182327	9.31155e-17	2.30874	0.022586	0.568881	-3.38664
USP35	0.16217	-2.00556e-16	2.30769	0.0226462	0.568881	-3.38874
REG1A	0.810079	-1.0386e-16	2.30735	0.022666	0.568881	-3.38943
C16orf71	0.204662	1.71906e-16	2.30478	0.0228144	0.568881	-3.39458
CD180	0.232518	3.58136e-18	2.30438	0.0228376	0.568881	-3.39538
ATP10D	0.368178	2.14882e-17	2.30367	0.0228783	0.568881	-3.39679
GOLGA8F	0.176413	7.52087e-17	2.3035	0.0228883	0.568881	-3.39713
NBPF1	0.19682	-3.79625e-16	2.3027	0.0229351	0.568881	-3.39874
HLA-DQA2	0.283155	4.33345e-16	2.30233	0.0229562	0.568881	-3.39947
BTBD16	0.195255	-2.65021e-16	2.30157	0.0230004	0.568881	-3.40098
PRKD1	0.434778	-1.18185e-16	2.30139	0.0230113	0.568881	-3.40136
GPR137B	0.32788	-1.36092e-16	2.30093	0.0230377	0.568881	-3.40226
SMC5-AS1	0.172015	-1.64743e-16	2.30085	0.0230425	0.568881	-3.40243
SLCO2B1	0.33184	-1.95184e-16	2.30048	0.0230642	0.568881	-3.40317
EPYC	0.534866	1.95184e-16	2.29913	0.0231429	0.569746	-3.40586
MEIS3P1	0.25412	-6.08832e-17	2.29673	0.0232839	0.571783	-3.41065
SPATA5	0.27763	-3.22323e-17	2.29601	0.0233263	0.571783	-3.41208
RTP5	0.19434	-2.50696e-16	2.29589	0.0233333	0.571783	-3.41232
CNTNAP4	0.208847	5.73018e-17	2.29484	0.0233957	0.571783	-3.41443
CLCN1	0.194083	-6.08832e-17	2.29483	0.0233965	0.571783	-3.41445
CADPS	0.495565	-8.05807e-17	2.29458	0.0234108	0.571783	-3.41493
PTN	0.228167	-1.0386e-16	2.29453	0.0234141	0.571783	-3.41505
SYNPO	0.217765	-3.72462e-16	2.29339	0.0234817	0.572921	-3.41732
MBNL1-AS1	0.252561	1.8265e-16	2.29125	0.0236086	0.572951	-3.42157
MAP4K4	0.213036	4.29764e-16	2.29036	0.0236622	0.572951	-3.42335
DOC2B	0.23458	-8.95341e-17	2.29012	0.0236761	0.572951	-3.42382
MT2A	0.431254	-5.58693e-16	2.28988	0.0236903	0.572951	-3.42429
PTPRC	0.549098	6.08832e-17	2.28882	0.023754	0.572951	-3.4264
BAAT	0.22889	-6.80459e-17	2.2887	0.023761	0.572951	-3.42664
VPREB1	0.249757	-2.11301e-16	2.28844	0.0237768	0.572951	-3.42716
MT1P1	0.231475	-3.68881e-16	2.28778	0.0238166	0.573405	-3.42848
MT1XP1	0.280318	-2.90091e-16	2.28662	0.0238862	0.573463	-3.43078
LY6G5C	0.206964	-2.50696e-17	2.28637	0.0239015	0.573463	-3.43128
AP1S2	0.285953	-1.07441e-16	2.28574	0.0239394	0.573463	-3.43253
KIF26B	0.355705	1.64743e-16	2.28539	0.0239603	0.573463	-3.43322
LILRA2	0.185617	-1.93394e-16	2.28533	0.0239641	0.573463	-3.43334
KRTAP9-7	0.217928	-8.59528e-17	2.28484	0.0239934	0.573463	-3.43431
ATRN	0.2637	-1.68324e-16	2.2846	0.0240081	0.573463	-3.43479
FUT4	0.22263	3.43811e-16	2.28337	0.0240826	0.574659	-3.43723
SNRK	0.291715	6.80459e-17	2.28097	0.0242286	0.576125	-3.44199
CD300A	0.29822	-2.79346e-16	2.28015	0.0242787	0.576125	-3.44361
PTPRZ1	0.231307	2.13091e-16	2.27952	0.024317	0.576125	-3.44486
KCNT2	0.323288	1.64743e-16	2.27892	0.0243539	0.576125	-3.44605
MROH2B	0.254421	-5.90925e-17	2.27882	0.0243599	0.576125	-3.44625
KCNJ15	0.192139	-1.07441e-17	2.2785	0.0243794	0.576125	-3.44688
SNX19	0.246064	-1.68324e-16	2.27803	0.0244085	0.576125	-3.44781
RPS27P18	0.187724	-1.8265e-16	2.27632	0.0245137	0.57696	-3.4512
LMOD1	0.295039	-1.79068e-16	2.27534	0.0245743	0.57739	-3.45314
OR4F13P	0.147186	3.58136e-18	2.27335	0.024697	0.578282	-3.45706
ULK4P1	0.254621	3.58136e-16	2.27164	0.0248037	0.57929	-3.46045
OPA1-AS1	0.174036	-3.4023e-17	2.26863	0.0249918	0.581037	-3.4664
KCNK2	0.183567	1.5758e-16	2.26852	0.0249982	0.581037	-3.4666
DLG4	0.263131	-2.04138e-16	2.26739	0.0250695	0.581037	-3.46884
RAPGEF6	0.196868	1.3251e-16	2.26695	0.0250967	0.581037	-3.46969
CPA3	0.478135	2.11301e-16	2.2667	0.0251126	0.581037	-3.47019
MGP	0.423929	-1.3072e-16	2.26568	0.0251772	0.581914	-3.47221
PLD3	0.223495	1.79068e-16	2.26476	0.0252352	0.581914	-3.47402
DHFRP2	0.158476	1.79068e-17	2.26333	0.0253258	0.582633	-3.47684
C1QTNF3	0.303555	-1.88022e-16	2.26226	0.0253936	0.582633	-3.47894
RFPL4AL1	0.199545	-1.46836e-16	2.26224	0.0253949	0.582633	-3.47898
ALCAM	0.348241	-1.11022e-16	2.25986	0.0255465	0.583997	-3.48366
CRIP1	0.418547	3.36648e-16	2.25927	0.0255839	0.583997	-3.48481
ZBTB46	0.153581	1.79068e-16	2.25896	0.0256041	0.583997	-3.48543
NXN	0.19788	2.79346e-16	2.25688	0.0257376	0.585947	-3.48952
OTUD7B	0.246859	6.80459e-17	2.25575	0.0258101	0.586247	-3.49173
APOA1	0.192939	1.3251e-16	2.25474	0.0258756	0.586757	-3.49372
TMEM109	0.235891	-3.07997e-16	2.2541	0.0259164	0.58709	-3.49495
ZNF532	0.469704	-4.1902e-16	2.25373	0.0259403	0.58709	-3.49568
IGIP	0.342715	3.58136e-17	2.25253	0.0260181	0.58732	-3.49803
ELMO1	0.22615	-1.39673e-16	2.25215	0.0260431	0.58732	-3.49878
C16orf72	0.197372	4.29764e-17	2.25141	0.0260915	0.58732	-3.50024
TAS2R62P	0.256452	1.3251e-16	2.25129	0.0260988	0.58732	-3.50046
UFSP2	0.243904	3.4023e-16	2.25104	0.0261155	0.58732	-3.50097
RBPMS-AS1	0.167415	-1.79068e-16	2.2502	0.0261703	0.587544	-3.50261
UBE2Q2P9	0.192276	1.79068e-17	2.24728	0.026361	0.587544	-3.50831
GULP1	0.505888	9.31155e-17	2.24586	0.0264547	0.587544	-3.5111
RDX	0.526557	2.6144e-16	2.24555	0.0264748	0.587544	-3.51169
RCBTB2	0.193782	5.01391e-17	2.24552	0.026477	0.587544	-3.51176
TMEM92-AS1	0.15849	7.879e-17	2.24543	0.0264826	0.587544	-3.51192
AOC4P	0.19256	3.72462e-16	2.24465	0.0265344	0.587544	-3.51346
RPS15AP16	0.201011	-9.66968e-17	2.24402	0.0265759	0.587987	-3.51468
CTSL3P	0.160219	2.11301e-16	2.24351	0.0266094	0.588251	-3.51567
CD84	0.315462	-8.95341e-17	2.24107	0.0267719	0.589456	-3.52045
UBE2Q2P12	0.247969	1.21766e-16	2.2402	0.0268295	0.58997	-3.52213
ATP6V0E2	0.236437	4.22601e-16	2.24007	0.0268384	0.58997	-3.5224
PDZRN3	0.18419	-3.86787e-16	2.23822	0.0269617	0.592203	-3.52599
NPTN-IT1	0.185684	-2.22045e-16	2.23705	0.0270402	0.592749	-3.52827
MEX3B	0.220279	1.46836e-16	2.23675	0.0270607	0.592749	-3.52887
EMP3	0.36296	4.15438e-16	2.23597	0.0271132	0.592749	-3.53039
UBE2F	0.322487	-3.72462e-16	2.23511	0.0271707	0.593333	-3.53205
RND1	0.2231	-7.16273e-17	2.23204	0.0273786	0.594238	-3.53802
SBSPON	0.397278	1.07441e-16	2.23182	0.0273937	0.594238	-3.53846
PERM1	0.188133	2.32789e-16	2.23169	0.0274026	0.594238	-3.53871
PLSCR4	0.27362	3.47392e-16	2.22969	0.0275383	0.59576	-3.54258
BANK1	0.26309	1.0386e-16	2.22883	0.0275973	0.596206	-3.54426
CUEDC2	0.198102	1.25348e-16	2.22831	0.027633	0.596206	-3.54527
SAA3P	0.140554	-4.01113e-16	2.22812	0.0276458	0.596206	-3.54563
ALOX5AP	0.348294	-2.57858e-16	2.22661	0.0277493	0.596762	-3.54856
SLAMF8	0.25546	-2.22045e-16	2.22515	0.0278498	0.597526	-3.55139
FAM174A	0.190421	-1.79068e-16	2.22193	0.0280721	0.60159	-3.55762
GUCA2B	0.205666	1.96975e-16	2.22153	0.0281003	0.601722	-3.55841
RBPMS2	0.294239	-7.16273e-17	2.22052	0.0281704	0.602277	-3.56036
LRRC46	0.166448	-5.73018e-17	2.21996	0.0282093	0.602636	-3.56144
GLRX	0.258327	3.1516e-16	2.21657	0.0284461	0.604857	-3.56798
TSPEAR-AS1	0.227246	2.14882e-16	2.2144	0.0285991	0.606414	-3.57218
P2RX5-TAX1BP3	0.239079	1.86231e-16	2.21356	0.0286581	0.606414	-3.57379
TBC1D9	0.294755	-2.14882e-17	2.21293	0.0287028	0.606414	-3.57501
PRKAR2B	0.275264	1.64743e-16	2.21033	0.028887	0.607464	-3.58002
GLDN	0.221018	-3.22323e-17	2.20821	0.029038	0.607464	-3.5841
DHRS4L2	0.146446	-1.21766e-16	2.20765	0.029078	0.607464	-3.58517
C1GALT1C1L	0.164565	0	2.20709	0.0291186	0.607464	-3.58626
ST6GALNAC6	0.224814	1.5758e-16	2.207	0.0291246	0.607464	-3.58643
CSF1	0.293348	-3.43811e-16	2.20693	0.0291299	0.607464	-3.58657
WFDC10B	0.227692	-1.25348e-16	2.20621	0.0291815	0.607464	-3.58795
WBP1LP4	0.192559	2.11301e-16	2.20605	0.029193	0.607464	-3.58826
GFAP	0.178193	1.68324e-16	2.20525	0.0292506	0.607763	-3.5898
ZNF175	0.188738	4.01113e-16	2.20469	0.0292906	0.608132	-3.59087
SOWAHD	0.199763	-3.1516e-16	2.20422	0.0293243	0.608368	-3.59177
MSNP1	0.217667	-1.93394e-16	2.20288	0.029421	0.60861	-3.59434
IRAK2	0.249273	1.0386e-16	2.20288	0.0294212	0.60861	-3.59435
GOLGA2	0.155564	3.36648e-16	2.20288	0.0294212	0.60861	-3.59435
CERS3-AS1	0.148809	1.07441e-17	2.20282	0.0294251	0.60861	-3.59445
VAMP2	0.233519	1.21766e-16	2.19997	0.0296322	0.612137	-3.59993
TRAJ19	0.275602	3.76043e-17	2.19955	0.0296629	0.612137	-3.60074
HBB	0.361258	-3.54555e-16	2.19749	0.0298126	0.613715	-3.60467
SNX29P1	0.228626	-1.68324e-16	2.19652	0.029884	0.614378	-3.60654
ST13P16	0.167979	2.14882e-17	2.19453	0.0300302	0.615174	-3.61035
MTUS1	0.227863	-7.01947e-16	2.19431	0.0300462	0.615174	-3.61077
C1GALT1P3	0.181776	-1.11022e-16	2.19401	0.030068	0.615174	-3.61134
RUBCN	0.237887	1.86231e-16	2.19355	0.0301018	0.615174	-3.61221
ACTN1	0.310221	5.37205e-17	2.1926	0.0301719	0.61566	-3.61403
CLIC4P2	0.160257	-1.41464e-16	2.19192	0.0302228	0.615778	-3.61535
CYCSP38	0.251773	2.00556e-16	2.19097	0.0302931	0.615831	-3.61716
INSM1	0.217777	-7.16273e-18	2.18839	0.0304843	0.616462	-3.62207
ACR	0.211918	6.62552e-17	2.18656	0.0306209	0.616462	-3.62556
RARRES1	0.546297	-5.73018e-17	2.18611	0.0306552	0.616462	-3.62643
WHAMMP3	0.303429	-8.95341e-17	2.18587	0.0306727	0.616462	-3.62688
PAM	0.375897	-2.04138e-16	2.18576	0.0306813	0.616462	-3.6271
COL8A2	0.185301	4.65577e-17	2.1857	0.0306853	0.616462	-3.6272
FSTL1	0.299209	-1.89812e-16	2.18409	0.0308068	0.617309	-3.63029
SYDE1	0.197013	-8.59528e-17	2.18301	0.0308877	0.617309	-3.63233
FBXL7	0.199189	-4.33345e-16	2.18281	0.030903	0.617309	-3.63272
CRIP1P4	0.313589	-1.36092e-16	2.18266	0.0309142	0.617309	-3.633
MRC2	0.226087	1.71906e-16	2.18233	0.030939	0.617309	-3.63362
ATL3	0.206631	8.59528e-17	2.18106	0.0310348	0.617309	-3.63604
SLC8A2	0.20858	4.29764e-17	2.18106	0.0310349	0.617309	-3.63604
CTDP1	0.21913	-2.57858e-16	2.1809	0.0310469	0.617309	-3.63634
TNFRSF10C	0.197005	-3.04416e-16	2.18012	0.0311065	0.617651	-3.63784
GAP43	0.195761	-4.44089e-16	2.17842	0.0312352	0.618933	-3.64106
CCL5	0.387514	-3.22323e-17	2.17795	0.0312714	0.618933	-3.64196
RAET1E	0.162679	-3.9395e-17	2.17687	0.0313537	0.618933	-3.64401
CCR4	0.312262	-2.11301e-16	2.17675	0.031363	0.618933	-3.64424
PINLYP	0.199561	1.8265e-16	2.17665	0.0313702	0.618933	-3.64442
IGFBP5	0.404457	3.29486e-16	2.17661	0.0313733	0.618933	-3.6445
CDY3P	0.250982	2.11301e-16	2.17337	0.0316217	0.618933	-3.65064
PARVG	0.235103	-8.95341e-17	2.17277	0.0316679	0.618933	-3.65178
IL18BP	0.315431	-4.15438e-16	2.1725	0.0316892	0.618933	-3.65231
MTCYBP13	0.175014	1.3251e-16	2.17168	0.0317526	0.618933	-3.65386
PLPPR4	0.337566	-2.13091e-16	2.17166	0.031754	0.618933	-3.6539
ARHGAP25	0.25508	3.58136e-18	2.17147	0.0317683	0.618933	-3.65425
ELN	0.146439	3.9395e-16	2.17127	0.031784	0.618933	-3.65463
GOLGA8K	0.24184	4.08276e-16	2.17108	0.0317986	0.618933	-3.65499
OR51E1	0.216489	1.28929e-16	2.17099	0.0318058	0.618933	-3.65517
MRPL42P2	0.160012	-7.52087e-17	2.16848	0.0319999	0.619215	-3.65991
PPP1R9B	0.194862	2.86509e-17	2.16838	0.0320081	0.619215	-3.66011
TRGJP1	0.501375	5.73018e-17	2.1678	0.0320528	0.619215	-3.66119
INPP5A	0.198066	7.879e-17	2.16773	0.0320588	0.619215	-3.66134
MOCS1	0.181494	-2.32789e-17	2.16771	0.0320603	0.619215	-3.66138
JADRR	0.156992	-1.18185e-16	2.16739	0.0320853	0.619215	-3.66198
HECTD2	0.302363	9.66968e-17	2.16736	0.0320873	0.619215	-3.66203
ATG14	0.239646	1.07441e-16	2.167	0.0321152	0.619215	-3.66271
SNORD74	0.295665	-6.08832e-17	2.16589	0.0322019	0.620269	-3.66481
ZDBF2	0.360336	1.61161e-16	2.16572	0.0322153	0.620269	-3.66513
ZNF280D	0.296129	-1.86231e-16	2.16401	0.0323495	0.62047	-3.66837
SNORD114-15	0.16988	-9.66968e-17	2.16396	0.0323535	0.62047	-3.66847
SELPLG	0.258248	-2.25626e-16	2.16377	0.0323684	0.62047	-3.66882
AHNAK2	0.401898	2.75765e-16	2.16343	0.0323949	0.62047	-3.66946
ZBTB8OS	0.253822	-3.9395e-17	2.16298	0.0324302	0.62047	-3.67031
PTENP1	0.160464	-2.93672e-16	2.16233	0.032481	0.620704	-3.67153
AFF3	0.355702	1.8265e-16	2.16006	0.0326601	0.622686	-3.67581
TLL2	0.154453	2.22045e-16	2.15949	0.0327057	0.622822	-3.67689
MZF1-AS1	0.19753	3.65299e-16	2.15933	0.0327179	0.622822	-3.67718
ATP1A4	0.175205	3.58136e-16	2.15641	0.0329506	0.623435	-3.6827
MYH10	0.165021	-3.22323e-16	2.15588	0.0329926	0.623798	-3.68369
GLP1R	0.221286	-1.18185e-16	2.15469	0.0330881	0.625171	-3.68594
BMS1P16	0.181671	2.86509e-16	2.1536	0.0331751	0.626381	-3.68798
TSPYL4	0.207998	-3.4023e-16	2.15325	0.0332032	0.626477	-3.68864
KCNN1	0.189297	8.59528e-17	2.15116	0.0333715	0.627769	-3.69257
KCNQ2	0.192012	2.18463e-16	2.15082	0.0333989	0.627769	-3.69321
PCBP4	0.180498	-2.79346e-16	2.15059	0.0334177	0.627769	-3.69365
PPEF1	0.187265	2.32789e-17	2.14973	0.0334867	0.627769	-3.69525
LEF1	0.274051	-9.31155e-17	2.14934	0.0335186	0.627769	-3.69599
MEIS2	0.447338	3.58136e-18	2.14882	0.0335602	0.627769	-3.69695
NID1	0.255569	-2.79346e-16	2.14782	0.0336419	0.627769	-3.69884
DAAM2	0.230568	5.01391e-17	2.14775	0.0336474	0.627769	-3.69897
F13A1	0.249458	1.61161e-17	2.14716	0.0336951	0.627769	-3.70007
KLK12	0.24836	3.72462e-16	2.14709	0.0337005	0.627769	-3.7002
RPL21P54	0.164997	-1.79068e-16	2.14683	0.0337224	0.627769	-3.7007
FER1L6	0.223231	2.32789e-16	2.14671	0.0337316	0.627769	-3.70091
GRAP	0.244357	1.43255e-16	2.14671	0.0337318	0.627769	-3.70092
MVB12A	0.191332	7.879e-17	2.14615	0.0337775	0.627769	-3.70197
GLIPR2	0.225142	-1.64743e-16	2.14443	0.0339177	0.628382	-3.70519
CNTNAP3B	0.184985	5.01391e-17	2.14225	0.0340964	0.628382	-3.70927
C10orf71-AS1	0.173884	1.25348e-16	2.14205	0.0341131	0.628382	-3.70965
VKORC1	0.379001	1.07441e-17	2.14204	0.0341138	0.628382	-3.70967
FAM193B	0.214422	1.5758e-16	2.14191	0.0341244	0.628382	-3.70991
KRTAP10-9	0.200653	-3.47392e-16	2.14139	0.0341673	0.628382	-3.71089
ARHGAP29	0.350111	3.9395e-17	2.14075	0.0342195	0.628382	-3.71207
IKZF2	0.294578	-9.13248e-17	2.1402	0.0342647	0.628382	-3.7131
IL25	0.160948	3.11579e-16	2.14015	0.034269	0.628382	-3.71319
FLNC	0.244652	-3.33067e-16	2.14012	0.0342713	0.628382	-3.71324
NMRK1	0.37314	-1.07441e-17	2.13985	0.0342938	0.628382	-3.71376
ADAMTS14	0.136017	-1.68324e-16	2.13821	0.0344295	0.630446	-3.71682
BAIAP3	0.193498	-2.86509e-16	2.13638	0.0345814	0.631117	-3.72024
UAP1L1	0.154077	1.64743e-16	2.13606	0.0346079	0.631117	-3.72083
ARID1B	0.223821	-2.86509e-17	2.13574	0.0346348	0.631117	-3.72144
SCGB1B2P	0.176614	3.11579e-16	2.13525	0.0346752	0.631117	-3.72234
FAM114A1	0.191356	-1.80859e-16	2.13488	0.0347063	0.631117	-3.72304
NRBF2P2	0.215939	1.07441e-17	2.13457	0.0347321	0.631117	-3.72362
UBA52P9	0.143961	1.21766e-16	2.13431	0.034754	0.631117	-3.7241
NBPF14	0.177547	1.86231e-16	2.13393	0.0347857	0.631117	-3.72481
NLRC4	0.213243	1.11022e-16	2.13379	0.0347973	0.631117	-3.72507
GJC1	0.175724	-1.64743e-16	2.13377	0.0347987	0.631117	-3.7251
TP73	0.18537	1.96975e-16	2.1336	0.0348129	0.631117	-3.72542
PRCP	0.427841	-3.22323e-17	2.13266	0.0348915	0.631658	-3.72717
SRGAP2B	0.322043	-3.65299e-16	2.13159	0.0349817	0.631658	-3.72917
MYADM	0.337471	3.25904e-16	2.131	0.0350311	0.631658	-3.73027
CPEB2	0.251269	8.95341e-17	2.13097	0.0350335	0.631658	-3.73032
HDAC5	0.252837	-3.47392e-16	2.12995	0.0351198	0.631658	-3.73223
OR52E3P	0.168651	3.22323e-17	2.12991	0.035123	0.631658	-3.7323
FCRL5	0.153063	1.53999e-16	2.12919	0.0351834	0.631658	-3.73363
STK10	0.492062	2.29207e-16	2.1287	0.0352251	0.631658	-3.73455
PRKCG	0.202313	6.80459e-17	2.12809	0.0352763	0.631658	-3.73568
NAIP	0.311432	1.28929e-16	2.12801	0.0352836	0.631658	-3.73584
TXNDC5	0.233163	-2.29207e-16	2.12786	0.035296	0.631658	-3.73611
NTF3	0.201556	-2.07719e-16	2.12783	0.0352989	0.631658	-3.73618
GPRIN3	0.329498	1.25348e-16	2.12775	0.0353055	0.631658	-3.73632
RPL7L1P3	0.222812	5.73018e-17	2.12491	0.035546	0.633313	-3.74159
HYI	0.199735	8.23714e-17	2.12483	0.0355534	0.633313	-3.74175
TM6SF1	0.218752	2.97253e-16	2.12405	0.03562	0.633549	-3.7432
GMIP	0.225192	-1.43255e-16	2.1224	0.0357607	0.63385	-3.74626
PHF24	0.148051	1.11022e-16	2.1223	0.0357694	0.63385	-3.74644
ANKRD20A10P	0.188152	8.95341e-17	2.12107	0.0358745	0.63385	-3.74872
PLK3	0.173232	2.65021e-16	2.12102	0.035879	0.63385	-3.74882
CD80	0.172908	-1.25348e-16	2.12096	0.0358842	0.63385	-3.74893
SH3PXD2B	0.212629	-3.43811e-16	2.12014	0.0359544	0.634125	-3.75044
ARAFP3	0.196496	2.11301e-16	2.11976	0.0359875	0.63413	-3.75115
KDR	0.215609	3.58136e-17	2.11729	0.0362005	0.63641	-3.75573
IL1R1	0.242374	3.58136e-16	2.11577	0.036332	0.638171	-3.75854
ERG	0.217533	0	2.11554	0.0363515	0.638171	-3.75895
EGFLAM	0.21413	-1.46836e-16	2.11518	0.0363831	0.638171	-3.75963
TSSK3	0.217287	3.90369e-16	2.11505	0.0363941	0.638171	-3.75986
VCAN-AS1	0.354331	2.0951e-16	2.11477	0.0364188	0.638194	-3.76039
SLC26A1	0.194189	-7.16273e-17	2.11396	0.0364895	0.638802	-3.76189
SGK1	0.361795	-3.11579e-16	2.11362	0.0365187	0.638802	-3.76251
TYK2	0.206302	-2.50696e-17	2.11356	0.0365237	0.638802	-3.76261
DUX4L47	0.186292	3.90369e-16	2.11127	0.0367237	0.640659	-3.76684
RPS26P21	0.190109	-3.83206e-16	2.10768	0.0370395	0.642238	-3.77347
OR7E47P	0.165872	-6.08832e-16	2.10684	0.0371136	0.642238	-3.77502
ATP10A	0.231756	2.93672e-16	2.10647	0.0371462	0.642238	-3.7757
KLF11	0.204984	1.93394e-16	2.10515	0.0372634	0.642238	-3.77814
GPR141	0.199581	-1.50417e-16	2.10495	0.037281	0.642238	-3.7785
TAT	0.174947	2.50696e-17	2.10385	0.0373788	0.642238	-3.78053
LPAR6	0.362537	-1.07441e-16	2.10358	0.0374028	0.642238	-3.78102
SLC25A30-AS1	0.142842	2.04138e-16	2.10283	0.0374693	0.642238	-3.7824
VSTM4	0.346183	-2.50696e-16	2.10211	0.0375336	0.642238	-3.78372
DYRK3	0.257912	3.65299e-16	2.10177	0.0375639	0.642238	-3.78435
SNORA70F	0.172281	-1.64743e-16	2.1015	0.0375884	0.642238	-3.78485
ASH1L-IT1	0.183818	-2.86509e-16	2.10122	0.0376137	0.642238	-3.78537
ADGRD1	0.186274	-1.46836e-16	2.10113	0.0376212	0.642238	-3.78553
SLC8A1	0.227176	-1.79068e-18	2.10095	0.0376376	0.642238	-3.78586
PADI4	0.196732	1.8265e-16	2.10048	0.0376796	0.642553	-3.78673
FUT11	0.191774	1.50417e-16	2.09836	0.03787	0.644664	-3.79062
VAC14-AS1	0.188017	-3.83206e-16	2.0983	0.0378747	0.644664	-3.79072
HCK	0.21005	-4.29764e-17	2.09769	0.0379297	0.644664	-3.79184
ZNF385D-AS2	0.202519	3.22323e-17	2.09767	0.037932	0.644664	-3.79189
PCED1B	0.177282	1.8265e-16	2.09623	0.0380618	0.645026	-3.79453
CD209	0.173721	-1.79068e-16	2.09614	0.0380695	0.645026	-3.79469
TMEM184B	0.309702	-6.80459e-17	2.0957	0.0381098	0.645026	-3.7955
WDR91	0.23216	3.72462e-16	2.09561	0.0381176	0.645026	-3.79566
HEPACAM2	0.453266	1.80859e-16	2.09545	0.0381317	0.645026	-3.79595
MFNG	0.261015	-2.39951e-16	2.09459	0.0382104	0.645956	-3.79754
DCST2	0.203898	5.73018e-17	2.09292	0.0383614	0.646779	-3.80059
ABHD5	0.175673	-8.05807e-17	2.09274	0.0383775	0.646779	-3.80091
FIBIN	0.217744	1.79068e-16	2.09214	0.0384323	0.647304	-3.80202
MT1P3	0.185706	-3.79625e-16	2.09031	0.0385997	0.647688	-3.80537
CCL3	0.239982	8.59528e-17	2.09027	0.0386027	0.647688	-3.80543
DNM1P28	0.154404	3.00835e-16	2.08905	0.0387148	0.648315	-3.80767
TEK	0.160211	-6.44646e-17	2.08829	0.0387844	0.648315	-3.80906
TRIM72	0.18278	-2.90091e-16	2.08726	0.038879	0.648315	-3.81094
TRIM49D1	0.168171	3.68881e-16	2.08718	0.0388867	0.648315	-3.8111
HDX	0.259807	-7.16273e-17	2.08708	0.038896	0.648315	-3.81128
STRADA	0.273983	-3.86787e-16	2.08678	0.0389235	0.648377	-3.81183
SRGN	0.511277	-2.86509e-16	2.0865	0.0389487	0.648402	-3.81233
SFTPA2	0.105157	-3.36648e-16	2.08432	0.0391501	0.648599	-3.81631
RHOT2	0.174326	3.22323e-16	2.08427	0.0391554	0.648599	-3.81641
PLA2G5	0.168956	4.65577e-17	2.08323	0.0392517	0.648599	-3.81831
RPS12P5	0.17506	-8.59528e-17	2.08309	0.0392642	0.648599	-3.81855
TCEAL4	0.206732	-4.22601e-16	2.08273	0.039298	0.648599	-3.81922
RRAS	0.169037	6.44646e-17	2.07936	0.0396118	0.651887	-3.82535
CSF1R	0.178176	-1.36092e-16	2.0786	0.039683	0.652666	-3.82674
GABRG3-AS1	0.146453	-3.72462e-16	2.07674	0.0398573	0.655138	-3.83012
FN1	0.544108	-2.43533e-16	2.07493	0.0400278	0.656583	-3.83341
CD1A	0.190914	-1.70115e-16	2.0743	0.0400873	0.656583	-3.83456
RASL10A	0.205896	-1.59371e-16	2.07412	0.0401038	0.656583	-3.83488
RPL7P17	0.192348	-1.71906e-16	2.07379	0.0401348	0.656583	-3.83547
RIMKLB	0.283499	4.29764e-17	2.07305	0.0402055	0.656583	-3.83683
VSIG8	0.1943	1.0386e-16	2.073	0.0402098	0.656583	-3.83691
ECM1	0.252185	-6.08832e-17	2.07238	0.0402682	0.656751	-3.83803
CD200	0.46833	-3.43811e-16	2.07203	0.040302	0.656911	-3.83868
RGCC	0.414786	1.3251e-16	2.07134	0.0403673	0.65733	-3.83993
PRDM2	0.196585	-5.73018e-17	2.07125	0.0403759	0.65733	-3.84009
ZEB2	0.207704	-1.68324e-16	2.07045	0.0404513	0.658166	-3.84153
CMKLR1	0.310889	-1.75487e-16	2.06972	0.0405215	0.658915	-3.84286
PIAS2	0.375464	2.54277e-16	2.06812	0.0406745	0.659874	-3.84577
MT1X	0.374971	2.86509e-16	2.06809	0.0406772	0.659874	-3.84582
BNIP3P29	0.221699	1.79068e-17	2.06542	0.0409327	0.661773	-3.85064
TNFRSF11B	0.556639	2.6144e-16	2.06535	0.0409397	0.661773	-3.85077
PLEKHO2	0.230893	-4.1902e-16	2.06477	0.0409955	0.661892	-3.85182
RPS6KA2	0.174347	-1.64743e-16	2.06378	0.0410908	0.662647	-3.85361
PPP2R2B	0.235847	3.9395e-16	2.0622	0.0412436	0.662951	-3.85647
FICD	0.196798	1.14604e-16	2.06122	0.0413385	0.662951	-3.85824
HAGLROS	0.16322	-1.25348e-16	2.06066	0.0413929	0.662951	-3.85925
WHAMMP1	0.223681	1.95184e-16	2.06034	0.041424	0.662951	-3.85983
WDR26	0.229014	-3.58136e-18	2.05932	0.0415225	0.662951	-3.86166
ZDHHC16	0.179268	1.07441e-16	2.05846	0.0416061	0.662951	-3.86321
RGR	0.158185	2.79346e-16	2.0583	0.0416218	0.662951	-3.8635
SNORD114-2	0.252222	4.29764e-17	2.05682	0.0417669	0.662951	-3.86618
ASAH1	0.268505	-3.22323e-16	2.05648	0.0418	0.662951	-3.86679
BDH2P1	0.202685	2.97253e-16	2.05459	0.0419857	0.662951	-3.8702
RBFOX2	0.238969	-1.43255e-17	2.05413	0.0420306	0.662951	-3.87102
HSD3B2	0.17791	4.29764e-17	2.05397	0.0420464	0.662951	-3.87131
C19orf84	0.157288	-2.86509e-17	2.0538	0.0420633	0.662951	-3.87162
RAB28	0.24846	4.29764e-17	2.05351	0.0420912	0.662951	-3.87213
LGALS17A	0.187019	-6.80459e-17	2.0532	0.0421224	0.662951	-3.8727
PLK2	0.383142	-1.0386e-16	2.05285	0.042157	0.662951	-3.87333
RXFP1	0.186664	1.02069e-16	2.0528	0.0421619	0.662951	-3.87342
COLCA1	0.262789	-1.64743e-16	2.05188	0.0422522	0.662951	-3.87506
OR6R2P	0.192472	6.08832e-17	2.05177	0.0422636	0.662951	-3.87527
C12orf71	0.130276	-1.71906e-16	2.0517	0.0422698	0.662951	-3.87538
MLPH	0.347233	-1.28929e-16	2.0509	0.0423491	0.662951	-3.87683
GALR1	0.141415	-5.37205e-17	2.05089	0.0423502	0.662951	-3.87684
CDKN2B-AS1	0.207516	0	2.05084	0.0423548	0.662951	-3.87693
ACP5	0.220214	2.50696e-16	2.05069	0.04237	0.662951	-3.8772
ANKRD6	0.247952	-2.93672e-16	2.05051	0.0423879	0.662951	-3.87753
TBC1D1	0.259357	3.79625e-16	2.04983	0.0424549	0.662951	-3.87874
TMEM94	0.215595	-1.21766e-16	2.04891	0.0425465	0.662951	-3.8804
PTGER4	0.277402	-4.1902e-16	2.04823	0.0426144	0.662951	-3.88163
HOXB5	0.196041	-3.36648e-16	2.04823	0.0426144	0.662951	-3.88163
TNFRSF1B	0.210352	4.29764e-17	2.04776	0.0426613	0.662951	-3.88247
BTD	0.234526	-1.71906e-16	2.04771	0.0426663	0.662951	-3.88256
STK38L	0.290317	2.14882e-16	2.0476	0.042677	0.662951	-3.88276
THAP8	0.184101	-2.07719e-16	2.04721	0.042716	0.662951	-3.88346
PTGER3	0.19823	3.58136e-18	2.04654	0.0427823	0.662951	-3.88465
ZNF385A	0.232712	-3.11579e-16	2.0465	0.0427862	0.662951	-3.88472
FAM157A	0.182762	-3.07997e-16	2.04594	0.0428427	0.662951	-3.88573
ACTBL2	0.192593	-2.86509e-17	2.04562	0.042874	0.662951	-3.8863
FXR2	0.183051	-3.58136e-16	2.04537	0.0428993	0.662951	-3.88675
SALL3	0.144395	-6.44646e-17	2.04408	0.0430283	0.664237	-3.88906
DNAJC1	0.212966	-8.95341e-17	2.04104	0.0433342	0.664237	-3.8945
FOXN3P1	0.215202	-3.47392e-16	2.04069	0.0433703	0.664237	-3.89514
PTTG1IP	0.246074	6.08832e-17	2.04039	0.0434007	0.664237	-3.89568
CD44	0.290907	-1.43255e-16	2.03937	0.0435033	0.664237	-3.89749
IL6	0.49077	-1.3072e-16	2.03932	0.0435087	0.664237	-3.89759
ITGAX	0.180041	1.50417e-16	2.03891	0.0435506	0.664237	-3.89833
LAIR1	0.233682	1.96975e-16	2.03837	0.0436052	0.664237	-3.89929
CAMK1	0.134758	-2.65021e-16	2.03553	0.0438937	0.667252	-3.90435
TRPM5	0.175728	1.8265e-16	2.0339	0.0440605	0.668671	-3.90726
RGS3	0.152637	3.72462e-16	2.03358	0.0440928	0.66879	-3.90782
C17orf99	0.223144	3.58136e-18	2.03292	0.0441609	0.668804	-3.90901
LRRC8C	0.254277	3.72462e-16	2.03234	0.0442204	0.668804	-3.91004
SLN	0.245746	-1.8265e-16	2.03233	0.0442211	0.668804	-3.91005
SBNO2	0.315291	-1.93394e-16	2.03229	0.0442257	0.668804	-3.91013
SNORA11	0.287283	1.14604e-16	2.03032	0.0444283	0.66892	-3.91364
DNAJB5	0.209393	-1.39673e-16	2.03019	0.044442	0.66892	-3.91388
TRBV3-1	0.150921	-3.97531e-16	2.03016	0.0444444	0.66892	-3.91392
NHSL2	0.272614	1.89812e-16	2.02891	0.0445744	0.669303	-3.91616
NBPF25P	0.153243	1.21766e-16	2.02873	0.0445924	0.669303	-3.91647
ANKRD33	0.161235	2.86509e-17	2.02816	0.0446517	0.669457	-3.91749
BNIP3	0.237417	4.08276e-16	2.02763	0.0447068	0.669533	-3.91843
ATOH8	0.211153	4.01113e-16	2.02669	0.044804	0.669533	-3.9201
LRRC32	0.267215	-2.43533e-16	2.02589	0.0448868	0.670247	-3.92151
SNCAIP	0.261179	-3.22323e-17	2.02576	0.0449008	0.670247	-3.92175
WNT5A	0.274186	1.79068e-17	2.02448	0.0450343	0.671505	-3.92403
LYVE1	0.257221	2.3637e-16	2.0237	0.0451157	0.671985	-3.92541
RIC8A	0.175656	-5.73018e-17	2.02295	0.0451941	0.672251	-3.92674
XAGE2	0.180607	-1.61161e-16	2.02258	0.0452325	0.672251	-3.9274
GLTP	0.207707	3.58136e-18	2.02233	0.0452589	0.672251	-3.92784
RBFA	0.197392	-1.28929e-16	2.02211	0.0452813	0.672251	-3.92822
HPGDS	0.227343	1.21766e-16	2.02157	0.0453383	0.672732	-3.92919
ACO1	0.277989	3.76043e-16	2.02045	0.0454559	0.673744	-3.93117
OGFRL1	0.543554	1.89812e-16	2.01984	0.0455201	0.673853	-3.93225
DNMT1	0.166695	3.50974e-16	2.01968	0.0455373	0.673853	-3.93254
HOXD8	0.16259	3.97531e-16	2.01869	0.0456416	0.674523	-3.93429
PRAME	0.160733	1.28929e-16	2.01828	0.0456845	0.674523	-3.93501
CCL2	0.289561	1.0386e-16	2.01812	0.0457021	0.674523	-3.93531
C4BPAP2	0.209187	-1.79068e-16	2.01808	0.0457061	0.674523	-3.93538
SCIMP	0.353313	-1.75487e-16	2.01773	0.0457426	0.67453	-3.93599
KCNJ8	0.130882	2.72184e-16	2.0174	0.0457775	0.67453	-3.93657
OR4P4	0.157073	1.25348e-16	2.01737	0.0457807	0.67453	-3.93663
SLC22A17	0.17538	-2.14882e-16	2.01556	0.0459723	0.675128	-3.93982
ITGB1P1	0.342984	3.97531e-16	2.01284	0.0462616	0.676868	-3.94463
SNORD114-12	0.283705	-2.14882e-16	2.01246	0.0463031	0.677111	-3.94531
TVP23CP1	0.199225	-1.8265e-16	2.01194	0.0463581	0.677262	-3.94622
FRMD7	0.153933	-5.37205e-18	2.01122	0.0464353	0.677262	-3.9475
AKAP13	0.308151	-1.28929e-16	2.0112	0.0464374	0.677262	-3.94753
KRTAP1-4	0.220967	3.90369e-16	2.01014	0.0465507	0.678189	-3.9494
FPR3	0.401765	1.86231e-16	2.00981	0.0465865	0.678349	-3.94998
REG1B	0.42551	-7.16273e-18	2.00907	0.0466663	0.678928	-3.95129
SHC1	0.285231	4.29764e-16	2.00809	0.0467709	0.678981	-3.95301
LRRC4B	0.192261	1.46836e-16	2.00802	0.0467791	0.678981	-3.95314
ZFP92	0.184026	1.50417e-16	2.0068	0.0469106	0.679445	-3.95529
GPRC5B	0.169881	3.58136e-18	2.00584	0.0470141	0.679529	-3.95697
CNOT2	0.283084	4.01113e-16	2.00513	0.0470914	0.6799	-3.95823
ZMYND19P1	0.166939	9.66968e-17	2.00412	0.0472005	0.680759	-3.96
EPHA4	0.382794	-2.18463e-16	2.00291	0.0473319	0.681131	-3.96213
IGKV1D-35	0.20895	3.61718e-16	2.00264	0.0473621	0.681131	-3.96262
OR7C1	0.151929	-2.11301e-16	2.00123	0.0475158	0.682171	-3.96509
GNAI1	0.411524	3.29486e-16	1.9998	0.0476715	0.68293	-3.96759
STIM2	0.309718	2.11301e-16	1.99964	0.0476891	0.68293	-3.96787
P3H4	0.167797	2.18463e-16	1.99889	0.0477714	0.68293	-3.96919
GFOD1	0.192332	2.50696e-17	1.99647	0.0480377	0.685944	-3.97344
PPFIBP1	0.213825	1.43255e-17	1.99483	0.0482191	0.686938	-3.97632
PAFAH2	0.134843	3.22323e-16	1.99472	0.0482312	0.686938	-3.97651
AQP4-AS1	0.153517	-3.1516e-16	1.99422	0.048286	0.687148	-3.97738
FRZB	0.253616	-3.1516e-16	1.99385	0.0483267	0.687148	-3.97802
HMGN2P19	0.172737	-3.65299e-16	1.99377	0.0483358	0.687148	-3.97817
TAGAP	0.142416	2.65021e-16	1.99154	0.0485836	0.688276	-3.98207
IAPP	0.159381	-1.43255e-17	1.9908	0.048666	0.688276	-3.98336
FPR2	0.266318	-1.79068e-16	1.99074	0.0486731	0.688276	-3.98348
FAM90A3P	0.185755	4.29764e-17	1.98895	0.0488723	0.690281	-3.98659
NEK2P4	0.140623	4.29764e-17	1.98796	0.0489837	0.690668	-3.98833
TXNIP	0.396004	3.58136e-18	1.98794	0.0489856	0.690668	-3.98836
MSANTD3-TMEFF1	0.173181	9.31155e-17	1.98667	0.0491282	0.691034	-3.99058
PRH2	0.162023	1.0386e-16	1.98532	0.0492797	0.692096	-3.99293
PCM1	0.259577	-6.44646e-17	1.98282	0.0495617	0.694063	-3.99728
RGS2	0.437602	-2.00556e-16	1.98282	0.0495624	0.694063	-3.99729
FZD9	0.15117	-3.43811e-16	1.9828	0.049564	0.694063	-3.99732
PLA2G2E	0.147437	2.43533e-16	1.98209	0.049645	0.694069	-3.99856
PELI2	0.252415	-1.75487e-16	1.97859	0.0500422	0.696002	-4.00464
MGAT1	0.15709	-2.39951e-16	1.97759	0.0501571	0.696076	-4.00639
KCNE5	0.174612	-1.39673e-16	1.97676	0.0502523	0.696076	-4.00783
SCARNA15	0.167402	1.64743e-16	1.97624	0.0503117	0.696076	-4.00873
TMEM91	0.212571	2.86509e-16	1.97589	0.0503514	0.696076	-4.00933
AMY1B	0.163981	1.61161e-16	1.97562	0.0503825	0.696076	-4.00981
ACTN2	0.18158	1.36092e-16	1.97546	0.0504009	0.696076	-4.01008
RIBC1	0.149249	1.86231e-16	1.97443	0.0505187	0.696597	-4.01186
MAGED1	0.222438	-2.05928e-16	1.97365	0.0506092	0.697141	-4.01323
CALCRL	0.301424	-8.59528e-17	1.97317	0.050664	0.697544	-4.01405
CRISPLD2	0.191545	3.58136e-17	1.97285	0.0507008	0.697699	-4.0146
ACTG1P16	0.14085	-2.86509e-17	1.97237	0.0507568	0.698117	-4.01544
CIDEB	0.176588	-1.79068e-16	1.97149	0.0508585	0.698812	-4.01697
IQGAP2	0.369762	1.68324e-16	1.971	0.050915	0.699235	-4.01781
CD82	0.174747	3.50974e-16	1.97049	0.0509748	0.699705	-4.01871
PRKG1	0.283125	3.22323e-17	1.96999	0.0510317	0.700134	-4.01956
ULK4	0.144852	-1.07441e-16	1.96953	0.0510859	0.700527	-4.02037
KCNMA1-AS1	0.149839	3.29486e-16	1.96869	0.0511835	0.701318	-4.02182
SLC9B1P4	0.136715	2.00556e-16	1.96859	0.051195	0.701318	-4.02199
FTH1P24	0.126074	2.93672e-16	1.9681	0.0512522	0.70138	-4.02284
NXPE2	0.385716	-5.01391e-17	1.9676	0.0513097	0.70138	-4.02369
ZNF248	0.184888	3.43811e-16	1.96723	0.0513537	0.70138	-4.02435
CTAGE13P	0.170301	-8.23714e-17	1.96658	0.0514293	0.702061	-4.02547
DLG3-AS1	0.120016	-3.1516e-16	1.9663	0.051462	0.702156	-4.02595
HTRA3	0.172269	-4.40508e-16	1.96491	0.0516244	0.703669	-4.02835
PDCD6IP	0.215612	-8.59528e-17	1.96337	0.0518052	0.703924	-4.03101
MTND4P4	0.142283	-1.66533e-16	1.9626	0.0518959	0.703924	-4.03234
WBP1LP3	0.194794	-1.71906e-16	1.96161	0.0520124	0.703924	-4.03404
CD59	0.346105	1.39673e-16	1.96151	0.0520237	0.703924	-4.03421
FABP7P1	0.174845	-2.18463e-16	1.96138	0.0520392	0.703924	-4.03444
NINJ1	0.191823	2.65021e-16	1.96123	0.0520573	0.703924	-4.0347
ZNF561-AS1	0.197454	3.22323e-17	1.96109	0.0520739	0.703924	-4.03494
VPS25P1	0.168761	-1.75487e-16	1.96108	0.0520751	0.703924	-4.03496
FAM107B	0.289376	-3.43811e-16	1.96027	0.05217	0.703924	-4.03635
WBP1L	0.263001	5.01391e-17	1.95971	0.0522361	0.703924	-4.03731
MAPK8IP1	0.206178	-2.00556e-16	1.95962	0.0522476	0.703924	-4.03748
RETNLB	0.367846	-4.26182e-16	1.95869	0.0523571	0.703924	-4.03907
SCN3B	0.182243	1.71906e-16	1.95831	0.0524024	0.703924	-4.03973
DAPK1-IT1	0.13194	5.73018e-17	1.95819	0.0524166	0.703924	-4.03993
LILRP1	0.144783	1.61161e-16	1.95784	0.0524588	0.704127	-4.04054
CCNI	0.286418	8.88178e-16	1.95763	0.0524833	0.704127	-4.0409
NKX1-1	0.170208	-4.36926e-16	1.95697	0.0525621	0.704242	-4.04204
ROCK1	0.203162	-2.07719e-16	1.95669	0.052595	0.704242	-4.04252
EHD2	0.215143	-1.07441e-17	1.95645	0.0526238	0.704281	-4.04293
DMWD	0.250418	3.1516e-16	1.95437	0.0528722	0.705053	-4.04651
CLEC14A	0.13823	-2.79346e-16	1.95402	0.0529138	0.705053	-4.04711
SGPP1	0.21942	-8.23714e-17	1.95339	0.0529893	0.705573	-4.04819
CTBP2P5	0.143132	-7.52087e-17	1.95313	0.0530201	0.705573	-4.04863
HIPK2	0.290199	2.93672e-16	1.9524	0.0531079	0.705573	-4.04989
HEYL	0.162623	1.96975e-16	1.95094	0.0532831	0.705736	-4.05239
LL21NC02-21A1.1	0.195949	-3.07997e-16	1.95077	0.053304	0.705736	-4.05269
PNOC	0.196013	3.76043e-16	1.9505	0.0533361	0.705736	-4.05315
GOLGA8B	0.173257	-3.25904e-16	1.95038	0.0533508	0.705736	-4.05336
HBA2	0.317238	2.65021e-16	1.95037	0.0533516	0.705736	-4.05337
CTSE	0.50735	-2.39951e-16	1.95013	0.05338	0.705736	-4.05377
CCR3	0.134249	7.3418e-17	1.94988	0.0534108	0.705736	-4.05421
ASTN2-AS1	0.137584	1.00278e-16	1.94954	0.053452	0.705736	-4.0548
SNORD114-28	0.216194	-2.43533e-16	1.94863	0.0535621	0.705736	-4.05636
FGF10	0.152533	-3.36648e-16	1.94809	0.0536265	0.705736	-4.05727
CNP	0.182687	-5.73018e-17	1.94793	0.0536468	0.705736	-4.05756
VSIG10L	0.206819	-1.07441e-16	1.94737	0.0537144	0.705736	-4.05851
KLHL10	0.156549	-3.58136e-17	1.94694	0.0537666	0.705736	-4.05925
BNIP3P8	0.173851	-6.62552e-17	1.94677	0.0537873	0.705736	-4.05954
LMCD1	0.185594	1.86231e-16	1.94676	0.0537885	0.705736	-4.05956
LTBP3	0.180069	3.1516e-16	1.94587	0.0538955	0.705736	-4.06107
CDC27P1	0.174721	-3.58136e-18	1.94571	0.0539157	0.705736	-4.06135
IGKV2-4	0.17102	-3.58136e-16	1.9457	0.0539168	0.705736	-4.06137
RPL21P38	0.123717	-3.79625e-16	1.94538	0.0539554	0.705736	-4.06191
ZNRF2P1	0.203263	7.52087e-17	1.94524	0.0539724	0.705736	-4.06215
RPS17P13	0.145398	3.00835e-16	1.94514	0.0539846	0.705736	-4.06232
IGBP1-AS1	0.135778	1.41464e-16	1.94298	0.0542478	0.705736	-4.06602
CGB2	0.194428	-5.73018e-17	1.94294	0.054253	0.705736	-4.06609
ITIH4	0.136843	-2.6144e-16	1.94281	0.0542686	0.705736	-4.06631
LRCH2	0.155557	6.44646e-17	1.94262	0.0542919	0.705736	-4.06663
COMT	0.170424	-1.21766e-16	1.94239	0.0543202	0.705736	-4.06703
TSPAN18	0.218628	3.61718e-16	1.94239	0.0543205	0.705736	-4.06703
FEZF1	0.190077	-8.59528e-17	1.94183	0.0543882	0.705736	-4.06798
TNRC6B	0.208467	2.79346e-16	1.94129	0.0544547	0.705736	-4.0689
PLEKHH2	0.375126	2.13091e-16	1.94073	0.0545232	0.705736	-4.06986
PCDHB5	0.238993	-9.84875e-17	1.94062	0.0545376	0.705736	-4.07006
PXN-AS1	0.158882	1.86231e-16	1.94037	0.0545679	0.705736	-4.07048
AIPL1	0.15569	-1.53999e-16	1.94015	0.0545951	0.705736	-4.07086
C1QC	0.229457	1.5758e-16	1.94008	0.0546032	0.705736	-4.07097
ATCAY	0.174328	-6.80459e-17	1.93972	0.0546472	0.705736	-4.07158
HNRNPFP1	0.145079	-2.07719e-16	1.93932	0.054697	0.705736	-4.07227
TLE4	0.225817	1.21766e-16	1.93882	0.0547584	0.705861	-4.07312
MYO5A	0.208578	1.75487e-16	1.93734	0.054941	0.707501	-4.07565
FBP2	0.180475	1.66533e-16	1.9369	0.0549947	0.70753	-4.07639
PDCD1LG2	0.248085	-8.59528e-17	1.93672	0.0550175	0.70753	-4.0767
NBPF26	0.203623	2.97253e-16	1.93614	0.0550897	0.707967	-4.0777
NRK	0.138995	1.00278e-16	1.93523	0.0552018	0.708566	-4.07924
TBCEL	0.304634	-7.16273e-18	1.93481	0.0552543	0.708675	-4.07996
IGHA1	0.569553	-3.65299e-16	1.93446	0.0552978	0.708675	-4.08055
KCTD9P6	0.166211	-3.58136e-18	1.93423	0.0553258	0.708675	-4.08094
CDK2AP1	0.189091	-1.3251e-16	1.93371	0.0553902	0.708675	-4.08182
CHMP1B	0.243632	3.83206e-16	1.93361	0.0554034	0.708675	-4.082
HTR2C	0.180731	-1.07441e-17	1.93226	0.0555707	0.709982	-4.08428
PLPPR2	0.23322	4.29764e-16	1.93225	0.0555722	0.709982	-4.08431
UCMA	0.161879	3.90369e-16	1.92979	0.0558803	0.711588	-4.0885
FEZ1	0.204415	1.61161e-17	1.92894	0.0559859	0.712077	-4.08992
CD72	0.183073	4.15438e-16	1.92858	0.0560312	0.712077	-4.09054
KRTAP3-1	0.186994	3.65299e-16	1.92728	0.0561947	0.712077	-4.09274
RAET1L	0.234777	-3.9395e-17	1.92724	0.0562	0.712077	-4.09282
RPS6KA2-IT1	0.175222	6.08832e-17	1.92713	0.0562139	0.712077	-4.093
STARP1	0.166999	6.80459e-17	1.92602	0.0563536	0.712077	-4.09488
PXYLP1	0.20398	2.32789e-17	1.92583	0.0563776	0.712077	-4.0952
MAP1LC3BP1	0.170394	-4.65577e-17	1.92557	0.0564107	0.712077	-4.09565
PRSS53	0.184885	3.1516e-16	1.92522	0.0564545	0.712077	-4.09624
ZNF449	0.151811	-1.0386e-16	1.92471	0.0565194	0.712415	-4.09711
SPON2	0.151454	1.5758e-16	1.92277	0.0567647	0.71386	-4.10038
GOLGA8A	0.192069	-1.07441e-16	1.92209	0.0568513	0.71462	-4.10154
CSGALNACT2	0.269481	-1.71906e-16	1.92165	0.0569072	0.714888	-4.10228
FAM178B	0.167604	-1.36092e-16	1.92119	0.0569654	0.714902	-4.10305
RPL7AP14	0.201038	-6.08832e-17	1.92081	0.0570147	0.715028	-4.10371
ANXA2R	0.283153	-3.36648e-16	1.91968	0.0571578	0.716164	-4.10561
LMF1	0.131222	8.59528e-17	1.91935	0.0571998	0.716265	-4.10616
CCDC106	0.131109	3.29486e-16	1.91921	0.0572183	0.716265	-4.10641
SPRED1	0.12427	1.43255e-16	1.91863	0.057292	0.716692	-4.10738
TRIM49D2	0.149174	-4.65577e-17	1.91822	0.0573447	0.716695	-4.10808
C3	0.548052	-4.22601e-16	1.91717	0.0574799	0.717169	-4.10986
PRSS50	0.129504	4.22601e-16	1.91708	0.0574906	0.717169	-4.11
TSPYL2	0.193796	2.79346e-16	1.91602	0.0576275	0.717281	-4.11179
MCHR1	0.193437	3.9395e-17	1.91591	0.057641	0.717281	-4.11197
RAB4B	0.130296	-2.07719e-16	1.915	0.0577587	0.717942	-4.11351
TRPM2	0.116266	-6.44646e-17	1.91405	0.0578813	0.718219	-4.11512
PDLIM4	0.123455	-3.29486e-16	1.9138	0.0579132	0.718219	-4.11553
AQP8	0.17497	1.53999e-16	1.91051	0.0583386	0.719904	-4.12107
ADAMTS7P1	0.172278	-4.26182e-16	1.91037	0.0583572	0.719904	-4.12131
CDK14	0.310273	-4.29764e-17	1.90934	0.0584915	0.719904	-4.12304
ACTG1P20	0.182065	4.29764e-17	1.90824	0.0586344	0.719904	-4.12489
DCAF8	0.136895	1.50417e-16	1.90803	0.0586619	0.719904	-4.12524
NDUFS8	0.197743	1.39673e-16	1.90649	0.058863	0.719904	-4.12782
RGS16	0.166249	-4.22601e-16	1.90632	0.0588849	0.719904	-4.12811
PGM5P2	0.169199	-1.07441e-17	1.90539	0.0590069	0.719904	-4.12967
C1QB	0.243518	-8.59528e-17	1.90498	0.0590612	0.719904	-4.13036
HMGN2P11	0.169023	-1.39673e-16	1.90476	0.0590901	0.719904	-4.13073
RBM22P1	0.164035	-1.3251e-16	1.90471	0.059097	0.719904	-4.13082
MAF	0.308251	-3.22323e-16	1.90441	0.0591356	0.719904	-4.13131
TTTY14	0.186221	-1.43255e-16	1.90409	0.0591778	0.719904	-4.13185
CLEC5A	0.202133	2.07719e-16	1.90394	0.0591972	0.719904	-4.1321
LRP1	0.299026	3.04416e-16	1.90386	0.0592076	0.719904	-4.13223
RASD2	0.192376	1.39673e-16	1.90322	0.059292	0.719904	-4.13331
DDX39AP1	0.149366	1.64743e-16	1.90277	0.0593511	0.719904	-4.13406
LILRB1	0.162704	3.22323e-17	1.90264	0.0593686	0.719904	-4.13428
HMGN1P30	0.111346	-3.58136e-16	1.90184	0.0594741	0.719904	-4.13562
ELOVL2	0.142363	2.90091e-16	1.9016	0.0595063	0.719904	-4.13603
ZNF423	0.185476	-1.02069e-16	1.90116	0.0595643	0.719904	-4.13676
CT62	0.130273	-1.11022e-16	1.89982	0.0597413	0.719904	-4.139
DSG2-AS1	0.176422	1.11022e-16	1.89974	0.0597519	0.719904	-4.13914
TTI2	0.199459	3.9395e-17	1.89849	0.0599178	0.719904	-4.14123
ZNF391	0.165206	1.8265e-16	1.89823	0.0599524	0.719904	-4.14166
FIBCD1	0.176568	-8.23714e-17	1.89774	0.0600172	0.719904	-4.14248
PIN1	0.148668	-3.86787e-16	1.89704	0.0601103	0.719904	-4.14365
LRP10	0.209726	-2.79346e-16	1.89687	0.0601336	0.719904	-4.14394
CASC15	0.22484	2.86509e-16	1.8967	0.0601564	0.719904	-4.14423
CNTRL	0.240824	-2.20254e-16	1.89602	0.0602473	0.719904	-4.14536
FTH1P7	0.11717	-7.16273e-16	1.8959	0.0602629	0.719904	-4.14556
HOXD3	0.20488	3.04416e-17	1.8959	0.0602633	0.719904	-4.14556
TEP1	0.178651	-3.72462e-16	1.89404	0.0605118	0.719904	-4.14867
SPINK2	0.129573	-3.9395e-17	1.89357	0.0605748	0.719904	-4.14945
OR7E83P	0.134978	-1.79068e-16	1.89341	0.0605952	0.719904	-4.14971
E4F1	0.154669	-2.50696e-17	1.89334	0.0606051	0.719904	-4.14983
NUCB2	0.388337	2.79346e-16	1.89314	0.0606325	0.719904	-4.15017
ADAMTS1	0.367506	1.28929e-16	1.89302	0.0606483	0.719904	-4.15037
CD40	0.203458	-2.14882e-17	1.89251	0.0607167	0.719904	-4.15122
IL6R	0.162371	6.44646e-17	1.89236	0.0607361	0.719904	-4.15146
TFF2	0.367119	-3.25904e-16	1.89173	0.0608211	0.719904	-4.15251
KYNU	0.218965	-8.05807e-17	1.89167	0.06083	0.719904	-4.15262
BEND6	0.179258	1.21766e-16	1.89147	0.0608567	0.719904	-4.15295
SSH3	0.136818	-2.65021e-16	1.89036	0.0610054	0.719904	-4.15479
ACSL1	0.197007	-4.36926e-16	1.88988	0.0610704	0.719904	-4.15559
SEC24D	0.333567	2.86509e-16	1.8897	0.061095	0.719904	-4.1559
CREB3L1	0.212681	6.08832e-17	1.88889	0.0612046	0.720573	-4.15725
OR2X1P	0.125056	-1.07441e-16	1.88782	0.0613496	0.721036	-4.15903
ZMAT1	0.368695	-1.59371e-16	1.88632	0.0615526	0.721293	-4.16152
NKX6-3	0.147309	-2.47114e-16	1.88593	0.0616059	0.721563	-4.16217
WWTR1	0.222803	2.14882e-17	1.88565	0.0616443	0.721655	-4.16264
RPS6P22	0.160268	3.50974e-16	1.88509	0.06172	0.721682	-4.16356
NCF1C	0.189051	-1.21766e-16	1.88507	0.0617232	0.721682	-4.1636
LMO1	0.150697	-7.879e-17	1.8841	0.0618546	0.722155	-4.1652
XGY1	0.171839	-1.07441e-17	1.88404	0.0618625	0.722155	-4.1653
GABARAPL1	0.458041	1.71906e-16	1.88221	0.0621126	0.722626	-4.16833
FLJ43663	0.263071	-2.90091e-16	1.88216	0.0621201	0.722626	-4.16842
NUDT15	0.159127	-8.59528e-17	1.88182	0.0621662	0.722854	-4.16898
SULT1C3	0.170438	1.36092e-16	1.88108	0.0622678	0.723183	-4.17021
SCN11A	0.153382	1.00278e-16	1.88104	0.062274	0.723183	-4.17029
GNG11	0.265645	1.07441e-17	1.88018	0.0623916	0.724241	-4.17171
FAM151B	0.22592	-1.71906e-16	1.87995	0.0624235	0.724303	-4.17209
P2RY14	0.369717	2.50696e-16	1.87956	0.0624775	0.724622	-4.17274
GPR132	0.204173	2.00556e-16	1.87803	0.0626884	0.725008	-4.17528
FBXO8	0.243769	7.16273e-17	1.87781	0.0627181	0.725008	-4.17563
RCAN2	0.280773	1.21766e-16	1.87724	0.0627962	0.725008	-4.17657
ATP1A3	0.149396	-2.14882e-16	1.87662	0.062882	0.725008	-4.1776
NT5C3AP1	0.158889	1.68324e-16	1.87647	0.0629029	0.725008	-4.17785
SMARCB1	0.187044	-1.5758e-16	1.87643	0.0629087	0.725008	-4.17791
MYBPH	0.171334	-1.0386e-16	1.87636	0.0629184	0.725008	-4.17803
UBQLN4P2	0.186399	-5.01391e-17	1.87634	0.0629211	0.725008	-4.17806
PGBD1	0.146168	-3.18741e-16	1.87568	0.0630124	0.725008	-4.17915
CTSC	0.287171	-1.11022e-16	1.87523	0.0630756	0.725008	-4.17991
MATN1	0.157451	-1.39673e-16	1.87472	0.0631464	0.725008	-4.18075
KLF12	0.232974	5.01391e-17	1.8747	0.0631481	0.725008	-4.18077
BTBD19	0.179073	-4.11857e-16	1.87388	0.063263	0.725763	-4.18214
TWSG1	0.160591	7.879e-17	1.87366	0.0632936	0.725763	-4.1825
KLHL20	0.183871	3.9395e-16	1.87286	0.0634038	0.726553	-4.18381
IRX1	0.185928	-1.21766e-16	1.87259	0.0634424	0.726553	-4.18427
MILR1	0.213576	-8.59528e-17	1.87198	0.0635266	0.726604	-4.18526
ZFAT-AS1	0.146137	-1.09232e-16	1.87072	0.0637025	0.727396	-4.18734
HMCN1	0.19501	-1.62952e-16	1.86935	0.0638947	0.727946	-4.1896
ZSCAN25	0.141544	7.16273e-18	1.869	0.0639438	0.727946	-4.19018
LITAF	0.21467	-2.29207e-16	1.86884	0.0639657	0.727946	-4.19044
FBXO32	0.390529	1.00278e-16	1.86862	0.0639976	0.727946	-4.19081
ROBO2	0.158396	1.59371e-16	1.86838	0.0640305	0.727946	-4.1912
C5orf46	0.244011	-1.89812e-16	1.8681	0.0640706	0.727946	-4.19167
CHIC1	0.17903	2.22045e-16	1.86745	0.064162	0.728273	-4.19274
PARVB	0.194666	2.50696e-16	1.86725	0.064189	0.728273	-4.19306
IQCA1	0.167557	5.37205e-17	1.86615	0.0643448	0.729241	-4.19488
PSKH1	0.162015	-5.73018e-17	1.86583	0.0643894	0.729443	-4.1954
PGAM1P11	0.154191	-3.04416e-16	1.86545	0.0644427	0.729745	-4.19602
NUMA1	0.200408	-2.25626e-16	1.86409	0.0646359	0.730516	-4.19826
UGCG	0.213973	2.22045e-16	1.8638	0.0646766	0.730516	-4.19874
SP110	0.246438	4.26182e-16	1.86336	0.0647396	0.730516	-4.19947
SLC36A1	0.16895	-1.5758e-16	1.86304	0.0647846	0.730516	-4.19999
DPYSL2	0.280676	1.43255e-17	1.86208	0.0649206	0.730516	-4.20156
SULF2	0.370242	0	1.86203	0.0649273	0.730516	-4.20164
HLA-DOB	0.220889	-2.86509e-17	1.86184	0.0649541	0.730516	-4.20195
LPP	0.296543	3.86787e-16	1.86159	0.0649901	0.730516	-4.20237
OR7E157P	0.147835	1.96975e-16	1.86147	0.0650066	0.730516	-4.20256
SH3RF3	0.208124	-8.95341e-17	1.86139	0.0650192	0.730516	-4.2027
APP	0.189522	2.14882e-16	1.86094	0.0650824	0.730896	-4.20343
CYP21A1P	0.158864	7.16273e-18	1.86023	0.0651838	0.730896	-4.2046
C2orf88	0.21473	3.68881e-16	1.86017	0.0651924	0.730896	-4.2047
PSORS1C2	0.158743	1.07441e-16	1.8598	0.0652447	0.730896	-4.2053
AKAP10	0.271327	-2.57858e-16	1.85927	0.0653206	0.730896	-4.20617
VWF	0.128293	-2.65021e-16	1.85927	0.0653207	0.730896	-4.20617
FKBP9P1	0.194117	-2.93672e-16	1.85902	0.0653572	0.731004	-4.20659
DEFB136	0.187179	-1.52208e-16	1.85834	0.0654541	0.731533	-4.2077
ISYNA1	0.179192	-2.43533e-16	1.85783	0.0655267	0.731533	-4.20853
FGF1	0.139005	1.21766e-16	1.85707	0.0656349	0.731533	-4.20977
PRIMPOL	0.297082	3.58136e-17	1.85659	0.0657042	0.731533	-4.21056
CCBE1	0.199729	1.75487e-16	1.85635	0.0657391	0.731533	-4.21096
MXRA5Y	0.153592	9.31155e-17	1.85609	0.065776	0.731533	-4.21138
KCNK15	0.170628	7.879e-17	1.85602	0.0657867	0.731533	-4.2115
ZSWIM6	0.269646	3.76043e-17	1.85554	0.0658552	0.731533	-4.21229
EPC2	0.172355	6.80459e-17	1.85551	0.06586	0.731533	-4.21234
PRICKLE1	0.150331	3.54555e-16	1.85464	0.0659847	0.732257	-4.21376
PLEKHA2	0.251978	3.25904e-16	1.85293	0.0662318	0.733277	-4.21656
MAFA-AS1	0.117532	1.11022e-16	1.85235	0.0663153	0.733498	-4.2175
SPAG5-AS1	0.150838	-2.11301e-16	1.85211	0.0663499	0.733498	-4.21789
ALDH1A2	0.139849	2.14882e-16	1.85169	0.0664112	0.733498	-4.21859
NPDC1	0.169345	-4.01113e-16	1.85167	0.066413	0.733498	-4.21861
HLA-DMB	0.270771	2.86509e-16	1.85025	0.0666194	0.733997	-4.22093
MAP1A	0.149089	2.50696e-17	1.84963	0.0667086	0.734072	-4.22193
HAUS6P2	0.179042	-1.16394e-16	1.84947	0.0667328	0.734072	-4.22221
GPX6	0.179525	-1.79068e-17	1.84932	0.0667537	0.734072	-4.22244
BNIP3L	0.297995	3.07997e-16	1.84901	0.0668	0.734072	-4.22296
ARSB	0.213703	-3.97531e-16	1.84883	0.0668258	0.734072	-4.22325
HMGB1P27	0.176208	-3.22323e-17	1.84825	0.0669105	0.734092	-4.2242
DEFA5	0.623833	-1.8444e-16	1.84816	0.0669239	0.734092	-4.22435
IFI16	0.409266	3.58136e-17	1.84642	0.0671766	0.734975	-4.22717
GNAT2	0.192113	-3.36648e-16	1.84552	0.0673087	0.734975	-4.22864
NUP50	0.267505	-8.59528e-17	1.84531	0.0673401	0.734975	-4.22899
MICU1	0.252452	-2.79346e-16	1.84528	0.0673435	0.734975	-4.22903
BHLHE40-AS1	0.146122	-3.22323e-17	1.84527	0.0673447	0.734975	-4.22904
MAMLD1	0.157772	1.36092e-16	1.84408	0.0675201	0.735504	-4.23099
SOSTDC1	0.160244	-1.39673e-16	1.84396	0.0675375	0.735504	-4.23118
KDELR3	0.283771	-3.25904e-16	1.84292	0.0676908	0.735999	-4.23288
NPAS3	0.176618	-1.93394e-16	1.84248	0.0677546	0.736247	-4.23358
LYPD1	0.150297	2.14882e-16	1.84153	0.0678949	0.736459	-4.23513
TRAJ55	0.129446	1.86231e-16	1.83993	0.0681315	0.737766	-4.23773
PAX9	0.155663	-2.07719e-16	1.8397	0.0681653	0.737766	-4.2381
KIR3DX1	0.133189	-2.04138e-16	1.83956	0.0681861	0.737766	-4.23833
RNF225	0.184828	7.879e-17	1.83943	0.0682046	0.737766	-4.23854
COL2A1	0.184478	-1.3251e-16	1.83925	0.0682316	0.737766	-4.23883
SPATA6	0.260792	-1.3251e-16	1.83853	0.0683378	0.73833	-4.23999
SEMA7A	0.160335	-2.11301e-16	1.83762	0.0684738	0.738665	-4.24148
TRIP4	0.154432	1.14604e-16	1.83734	0.0685148	0.738665	-4.24193
TSHZ2	0.294977	-1.71906e-16	1.83723	0.0685312	0.738665	-4.24211
PRIMA1	0.154867	1.3251e-16	1.83699	0.0685674	0.738726	-4.2425
CC2D2A	0.200265	-1.00278e-16	1.83682	0.0685919	0.738726	-4.24277
GLIS1	0.142433	-1.5758e-16	1.83546	0.0687956	0.739472	-4.24499
PRAM1	0.197855	-1.86231e-16	1.83516	0.0688402	0.739538	-4.24547
FBXW4	0.171577	-7.879e-17	1.83469	0.0689101	0.739538	-4.24623
FRMD4B	0.16451	-8.95341e-17	1.83389	0.0690298	0.740274	-4.24753
TSPY2	0.114389	1.89812e-16	1.83372	0.0690547	0.740274	-4.2478
GNAL	0.247649	-1.25348e-16	1.83341	0.0691014	0.740427	-4.2483
GRIP2	0.197064	3.58136e-18	1.83161	0.0693715	0.74222	-4.25122
LTF	0.169984	-1.71906e-16	1.83157	0.0693776	0.74222	-4.25128
LYN	0.220392	-1.14604e-16	1.83084	0.0694869	0.742895	-4.25246
ELP3	0.408029	3.33067e-16	1.8306	0.0695222	0.742895	-4.25284
ST6GALNAC2	0.154169	-4.36926e-16	1.82841	0.069853	0.745522	-4.25638
PDPN	0.257516	1.36092e-16	1.82808	0.0699021	0.745522	-4.25691
FAM229B	0.195917	-2.86509e-17	1.82806	0.0699056	0.745522	-4.25694
IGSF21	0.166883	-2.00556e-16	1.82757	0.0699799	0.745742	-4.25774
FAM216A	0.161531	5.01391e-17	1.82647	0.0701455	0.746375	-4.2595
NRDC	0.191101	2.05928e-16	1.82636	0.0701621	0.746375	-4.25968
PTPRG	0.324738	1.53999e-16	1.82618	0.07019	0.746375	-4.25998
HLA-DRB5	0.485809	1.5758e-16	1.82604	0.0702118	0.746375	-4.26021
BST2	0.430586	3.50974e-16	1.82598	0.0702198	0.746375	-4.26029
BTN3A1	0.213019	2.18463e-16	1.82591	0.0702306	0.746375	-4.26041
LIMCH1	0.226805	-1.21766e-16	1.82517	0.0703436	0.746955	-4.26161
NAALADL2-AS1	0.146656	-1.0386e-16	1.82489	0.0703854	0.746955	-4.26205
IL17RD	0.221938	0	1.82447	0.0704494	0.746955	-4.26273
OR5AU1	0.201113	-1.43255e-17	1.82386	0.0705417	0.747421	-4.26371
ADAM22	0.368482	1.43255e-17	1.82378	0.070555	0.747421	-4.26385
FGFR2	0.261403	1.14604e-16	1.82362	0.0705787	0.747421	-4.2641
ANKRD33B-AS1	0.164728	5.01391e-17	1.82036	0.0710775	0.75099	-4.26935
DUSP22	0.114536	1.43255e-17	1.81925	0.0712468	0.751906	-4.27113
SLC25A39P2	0.153449	1.43255e-17	1.81895	0.0712924	0.751941	-4.2716
CACNA1I	0.172413	-8.59528e-17	1.81886	0.0713074	0.751941	-4.27176
VPS26BP1	0.223274	7.52087e-17	1.81865	0.0713384	0.751941	-4.27208
MYO3A	0.163161	-7.16273e-18	1.81729	0.071548	0.752757	-4.27427
GNAO1	0.186572	2.6144e-16	1.81657	0.0716589	0.752764	-4.27543
MS4A6A	0.364727	2.72184e-16	1.81639	0.0716866	0.752764	-4.27571
RPL5P7	0.146381	-3.58136e-17	1.8153	0.0718556	0.753947	-4.27747
TCEAL7	0.129709	4.15438e-16	1.81454	0.0719724	0.754017	-4.27868
TRAM2	0.243052	-6.08832e-17	1.8137	0.0721022	0.754046	-4.28002
HTR4	0.162308	-9.31155e-17	1.8133	0.0721648	0.754046	-4.28067
ARAP3	0.15373	-2.14882e-16	1.81315	0.0721889	0.754046	-4.28092
VIM-AS1	0.204415	6.80459e-17	1.81254	0.0722827	0.754046	-4.28188
IQCG	0.198505	-2.22045e-16	1.81213	0.072347	0.754046	-4.28255
LIMS3-LOC440895	0.139538	-1.00278e-16	1.81211	0.0723493	0.754046	-4.28257
SRSF4	0.131034	3.58136e-16	1.81187	0.0723876	0.754046	-4.28296
SNORA35	0.249469	2.11301e-16	1.81135	0.0724677	0.754046	-4.28379
CD101	0.130536	1.71906e-16	1.81085	0.0725451	0.754046	-4.28458
ABCB10P4	0.178455	-1.18185e-16	1.81036	0.0726225	0.754046	-4.28538
VEGFB	0.192491	3.29486e-16	1.80997	0.0726835	0.754046	-4.286
ACTBP14	0.172597	2.00556e-16	1.80968	0.0727276	0.754046	-4.28645
CDCP2	0.163685	2.72184e-16	1.80956	0.0727477	0.754046	-4.28666
GJA1P1	0.202003	-7.16273e-17	1.809	0.0728341	0.754655	-4.28754
FSCN1	0.153221	-4.36926e-16	1.80842	0.0729247	0.755004	-4.28847
BCL2L13	0.157799	1.75487e-16	1.8084	0.0729277	0.755004	-4.2885
FRMD6-AS1	0.13787	4.29764e-16	1.80815	0.0729672	0.755004	-4.2889
S1PR2	0.202315	-1.93394e-16	1.80789	0.0730089	0.755004	-4.28933
DKK1	0.230931	8.95341e-17	1.80773	0.0730337	0.755004	-4.28958
RELL2	0.186211	4.36926e-16	1.80698	0.0731512	0.755876	-4.29078
BPIFB9P	0.157179	7.16273e-18	1.8056	0.0733675	0.757307	-4.29297
EOGT	0.212897	-1.28929e-16	1.80537	0.0734032	0.75739	-4.29334
NBL1	0.22044	2.43533e-16	1.80478	0.0734967	0.758068	-4.29428
ETV5	0.531304	-4.15438e-16	1.80222	0.0739008	0.75938	-4.29836
ZNF710	0.178074	2.00556e-16	1.80161	0.0739969	0.759577	-4.29933
ZNF407	0.214674	7.16273e-18	1.80092	0.0741068	0.759577	-4.30043
RBM23	0.274285	2.00556e-16	1.79915	0.0743871	0.760336	-4.30324
CDY13P	0.171062	1.64743e-16	1.79874	0.0744522	0.760336	-4.30389
PRKACA	0.200007	4.01113e-16	1.79819	0.0745404	0.760336	-4.30477
SLC43A1	0.207828	5.37205e-17	1.79698	0.0747336	0.760336	-4.30669
NOXO1	0.175868	-2.39951e-16	1.79678	0.0747661	0.760336	-4.30702
BMS1P15	0.179044	-4.29764e-17	1.79629	0.0748429	0.760336	-4.30778
SEMG2	0.147856	1.25348e-16	1.79611	0.0748723	0.760336	-4.30807
FAM90A4P	0.147627	-3.76043e-16	1.79602	0.0748872	0.760336	-4.30822
CRYM	0.119167	1.21766e-16	1.79582	0.0749189	0.760336	-4.30853
PSAP	0.208752	-4.29764e-16	1.7953	0.0750022	0.760336	-4.30936
APOBEC3C	0.198102	-1.07441e-16	1.79518	0.0750216	0.760336	-4.30955
RASA3-IT1	0.138091	3.36648e-16	1.79502	0.0750475	0.760336	-4.30981
DEFB1	0.179025	1.96975e-16	1.79422	0.0751747	0.760336	-4.31107
NR3C1	0.307342	-1.00278e-16	1.79415	0.0751871	0.760336	-4.31119
DKK2	0.280999	4.1902e-16	1.79414	0.0751887	0.760336	-4.31121
HLA-S	0.182154	2.86509e-16	1.79378	0.0752463	0.760336	-4.31177
BACE1	0.160253	-1.43255e-17	1.79373	0.0752538	0.760336	-4.31185
PTPRU	0.251556	-1.96975e-16	1.79334	0.0753172	0.760336	-4.31247
PTPN6	0.179575	-1.0386e-16	1.7933	0.0753225	0.760336	-4.31253
LCE1C	0.126143	-8.59528e-17	1.79219	0.0755018	0.760336	-4.31429
LYPD2	0.151013	1.79068e-16	1.79116	0.075668	0.760336	-4.31592
NRG2	0.13182	1.0386e-16	1.79094	0.0757033	0.760336	-4.31627
CCDC8	0.17957	2.00556e-16	1.79061	0.0757568	0.760336	-4.3168
SLC9B1P2	0.190119	1.8265e-16	1.79052	0.0757709	0.760336	-4.31693
SNORD115-7	0.127646	-3.58136e-17	1.7896	0.0759191	0.760336	-4.31838
ACKR3	0.238863	-6.44646e-17	1.78912	0.0759979	0.760336	-4.31915
CCDC60	0.146639	1.00278e-16	1.78902	0.0760136	0.760336	-4.31931
DRC3	0.141761	1.12813e-16	1.78892	0.0760289	0.760336	-4.31946
ANXA1	0.392406	-1.43255e-17	1.7887	0.076065	0.760336	-4.31981
B3GALT4	0.206761	2.86509e-17	1.78868	0.0760688	0.760336	-4.31985
TANK	0.238831	9.66968e-17	1.78866	0.0760722	0.760336	-4.31988
GPR4	0.208215	2.79346e-16	1.78773	0.0762222	0.760336	-4.32134
KRTAP10-11	0.205718	-1.79068e-16	1.78769	0.0762293	0.760336	-4.32141
IGHV5-51	0.148227	-2.72184e-16	1.78752	0.076256	0.760336	-4.32167
SGCD	0.198423	-1.79068e-16	1.78705	0.0763331	0.760336	-4.32242
GOLT1B	0.170415	-2.07719e-16	1.78696	0.0763479	0.760336	-4.32256
RAI2	0.213502	-7.16273e-17	1.78694	0.076351	0.760336	-4.32259
ADGRF5P2	0.224955	4.29764e-17	1.7868	0.0763743	0.760336	-4.32282
FBXL15	0.150346	-3.54555e-16	1.78629	0.0764563	0.760336	-4.32362
EXT1	0.248544	1.46836e-16	1.78606	0.0764942	0.760336	-4.32398
ZNF79	0.182837	3.1516e-16	1.78583	0.076531	0.760336	-4.32434
DUXAP11	0.123845	6.08832e-17	1.78556	0.0765761	0.760336	-4.32478
CDH2	0.188716	1.23557e-16	1.78536	0.0766074	0.760336	-4.32508
WI2-87327B8.2	0.161564	6.80459e-17	1.78532	0.0766144	0.760336	-4.32515
TXLNB	0.163328	1.88022e-16	1.785	0.0766665	0.760336	-4.32565
TFF3	0.335075	-3.58136e-16	1.78429	0.0767827	0.760336	-4.32678
NRF1	0.155222	-1.75487e-16	1.78384	0.0768565	0.760336	-4.32749
TBXAS1	0.257819	5.01391e-17	1.78293	0.0770048	0.760336	-4.32892
RMDN2	0.160019	-1.79068e-16	1.78277	0.0770316	0.760336	-4.32918
PRSS1	0.168356	-1.43255e-16	1.78218	0.077127	0.760336	-4.33009
SGMS2	0.298714	7.16273e-18	1.78194	0.0771667	0.760336	-4.33048
EEF2	0.259413	-2.93672e-16	1.78189	0.0771756	0.760336	-4.33056
MMP1	0.263751	-2.14882e-17	1.78172	0.0772026	0.760336	-4.33082
CXCL1	0.270502	4.04694e-16	1.78128	0.0772751	0.760336	-4.33152
PPM1M	0.178662	5.37205e-18	1.78121	0.0772861	0.760336	-4.33162
CXCR3	0.166499	-7.52087e-17	1.78076	0.0773605	0.760336	-4.33234
DIXDC1	0.152841	2.65021e-16	1.78057	0.0773926	0.760336	-4.33264
TRBV13	0.141699	-2.32789e-16	1.78048	0.0774063	0.760336	-4.33278
HMGN2P38	0.14182	2.22045e-16	1.78039	0.0774208	0.760336	-4.33291
BSND	0.167178	-1.3251e-16	1.78031	0.0774351	0.760336	-4.33305
IGKV7-3	0.149376	3.22323e-16	1.77988	0.0775057	0.760336	-4.33373
SP2	0.195747	1.00278e-16	1.77932	0.0775982	0.760336	-4.33461
ASMTL-AS1	0.139618	-3.50974e-16	1.77876	0.07769	0.760336	-4.33549
MAST4-IT1	0.210398	-1.91603e-16	1.77806	0.077806	0.760336	-4.33659
OR8F1P	0.149683	-3.04416e-17	1.77785	0.0778391	0.760336	-4.33691
IQUB	0.156457	-1.91603e-16	1.77783	0.077844	0.760336	-4.33695
TGFB2	0.315997	-1.61161e-16	1.77778	0.0778512	0.760336	-4.33702
FKBP7	0.241139	3.58136e-17	1.77754	0.0778905	0.760336	-4.3374
B3GNT9	0.13866	1.8265e-16	1.77726	0.0779382	0.760336	-4.33785
PLS3	0.296656	2.86509e-17	1.77702	0.0779775	0.760336	-4.33822
CLCN4	0.194139	1.5758e-16	1.77669	0.0780316	0.760593	-4.33874
GOLGA8T	0.154378	-1.89812e-16	1.776	0.078146	0.760792	-4.33982
LETM2	0.17209	1.21766e-16	1.77577	0.078184	0.760792	-4.34018
TEX21P	0.143995	1.48627e-16	1.77515	0.0782876	0.760792	-4.34116
PRR25	0.178138	-3.33067e-16	1.77405	0.078469	0.760792	-4.34288
CSF2RB	0.14407	1.79068e-16	1.77404	0.0784706	0.760792	-4.34289
CACNA1C	0.206599	4.11857e-16	1.77379	0.0785123	0.760792	-4.34329
GLYCAM1	0.157528	4.29764e-17	1.77355	0.0785522	0.760792	-4.34366
ZNF605	0.186525	1.71906e-16	1.77354	0.0785536	0.760792	-4.34368
FSTL3	0.158509	-5.01391e-17	1.77329	0.0785955	0.760927	-4.34407
FOXO1	0.295453	-1.27138e-16	1.77296	0.0786505	0.76119	-4.34459
RGPD4	0.15522	1.43255e-17	1.77141	0.0789095	0.762831	-4.34702
RIC1	0.158734	-1.18185e-16	1.7714	0.0789106	0.762831	-4.34703
BORCS6	0.161453	5.37205e-17	1.77061	0.0790435	0.7631	-4.34828
DENND4B	0.191105	4.22601e-16	1.77014	0.0791212	0.76331	-4.349
FIGN	0.139262	1.66533e-16	1.76594	0.0798275	0.767111	-4.35558
EDF1	0.141741	3.22323e-16	1.76557	0.0798899	0.767201	-4.35616
RET	0.129804	-1.07441e-16	1.7654	0.0799179	0.767201	-4.35642
BCKDHB	0.2019	2.00556e-16	1.76458	0.080056	0.767477	-4.35769
FCGR2B	0.316773	2.39951e-16	1.76451	0.0800683	0.767477	-4.35781
DUSP1	0.309535	-2.18463e-16	1.76432	0.0800998	0.767477	-4.3581
NDN	0.185925	2.65021e-16	1.76408	0.0801417	0.767477	-4.35848
THAP3	0.185821	-4.29764e-17	1.7634	0.0802559	0.767477	-4.35954
SPINK6	0.149934	-9.49062e-17	1.76269	0.0803759	0.767549	-4.36064
SLC8B1	0.260222	3.76043e-16	1.76249	0.08041	0.767607	-4.36095
RUNDC3A-AS1	0.135237	2.20254e-16	1.76161	0.0805597	0.76812	-4.36233
OLR1	0.287563	3.43811e-16	1.76071	0.0807128	0.769152	-4.36373
UNC93B4	0.146893	-1.79068e-16	1.76026	0.0807903	0.769381	-4.36444
SEC61A1	0.239387	4.26182e-16	1.76	0.0808337	0.769381	-4.36484
NR3C2	0.300334	3.65299e-16	1.75996	0.0808409	0.769381	-4.3649
MRPS36P1	0.231922	2.6144e-16	1.75991	0.0808495	0.769381	-4.36498
NPY6R	0.517263	1.79068e-17	1.75891	0.0810203	0.769586	-4.36654
PAPPA-AS1	0.16876	-1.36092e-16	1.75885	0.0810303	0.769586	-4.36663
MRPS11	0.175624	7.16273e-17	1.75873	0.0810502	0.769586	-4.36681
GJA10	0.145699	-1.36092e-16	1.75864	0.0810664	0.769586	-4.36696
ALPK2	0.197363	-8.23714e-17	1.75803	0.0811698	0.769586	-4.3679
HLA-DQA1	0.325531	-3.58136e-16	1.75794	0.0811857	0.769586	-4.36805
VTRNA1-3	0.301555	-3.29486e-16	1.75779	0.0812116	0.769586	-4.36828
IFNA14	0.138699	-2.04138e-16	1.75728	0.0812975	0.769586	-4.36906
NTNG2	0.164405	-2.79346e-16	1.75703	0.0813403	0.769586	-4.36945
TMEM79	0.166853	-2.57858e-16	1.75653	0.0814261	0.769586	-4.37023
CLASRP	0.122145	-3.00835e-16	1.7562	0.0814829	0.769586	-4.37075
HTRA4	0.197633	8.23714e-17	1.75601	0.0815151	0.769586	-4.37104
OR10T2	0.135158	4.29764e-17	1.75573	0.0815636	0.769586	-4.37148
OSCAR	0.162529	2.39951e-16	1.75482	0.0817206	0.769623	-4.3729
FSIP1	0.147607	-4.65577e-17	1.75463	0.0817534	0.769666	-4.37319
IGFBP3	0.371716	-4.29764e-16	1.75443	0.0817877	0.769724	-4.3735
ZNF543	0.311242	1.00278e-16	1.75385	0.0818871	0.770394	-4.3744
COPS8P3	0.132137	-1.11022e-16	1.75311	0.0820137	0.77045	-4.37554
EIF3K	0.238055	-2.18463e-16	1.75264	0.0820947	0.770753	-4.37627
NLGN1	0.134268	2.11301e-16	1.7519	0.0822227	0.770797	-4.37742
KLK1	0.318091	-4.40508e-16	1.75175	0.0822497	0.770797	-4.37766
ACTG1P2	0.149526	3.58136e-18	1.75164	0.0822687	0.770797	-4.37783
IGHV3OR16-10	0.189796	1.79068e-16	1.75122	0.0823401	0.770927	-4.37847
BRD7P6	0.103818	1.07441e-16	1.75064	0.0824406	0.771025	-4.37937
TRIM8	0.149959	-5.37205e-17	1.74936	0.0826628	0.772599	-4.38135
MTCO2P7	0.12507	-1.02069e-16	1.74906	0.0827158	0.772599	-4.38183
GPR183	0.373669	-1.25348e-16	1.74847	0.0828177	0.773205	-4.38274
PSMD8	0.157504	2.90091e-16	1.74836	0.0828373	0.773205	-4.38291
SEC24B	0.200612	-1.50417e-16	1.7477	0.0829516	0.773743	-4.38393
GRAMD4P3	0.132265	-3.07997e-16	1.74651	0.0831591	0.77462	-4.38577
EBF4	0.158255	3.83206e-16	1.74616	0.0832193	0.774876	-4.3863
KRTAP4-1	0.156175	1.18185e-16	1.74524	0.0833795	0.774876	-4.38772
KCNB1	0.13462	-1.79068e-16	1.74524	0.0833801	0.774876	-4.38772
GFM1	0.134202	2.3637e-16	1.74518	0.0833909	0.774876	-4.38782
PHTF2	0.219442	3.58136e-17	1.74419	0.083564	0.77547	-4.38935
MSS51	0.133728	-8.23714e-17	1.74358	0.0836708	0.77547	-4.39029
DDX51	0.177797	7.16273e-18	1.74355	0.0836764	0.77547	-4.39034
RPS16P5	0.202203	-4.36926e-16	1.74323	0.0837315	0.775626	-4.39082
TPH2	0.154547	1.43255e-16	1.74158	0.084021	0.777607	-4.39337
TRGV3	0.152392	-1.07441e-17	1.74121	0.0840862	0.777947	-4.39394
ENTPD3-AS1	0.180116	1.25348e-16	1.74065	0.0841853	0.778449	-4.39481
CASC17	0.0967292	-3.76043e-17	1.74005	0.0842908	0.778449	-4.39573
OR7E37P	0.128151	-1.61161e-16	1.74004	0.0842934	0.778449	-4.39575
GCNT2	0.186804	-1.37883e-16	1.73918	0.0844454	0.778861	-4.39708
VCL	0.238063	-3.11579e-16	1.73913	0.0844533	0.778861	-4.39715
KCNA2	0.193773	-4.40508e-16	1.73903	0.0844702	0.778861	-4.39729
LIF	0.125323	4.08276e-16	1.73834	0.0845922	0.779336	-4.39836
VCAM1	0.169865	1.93394e-16	1.73826	0.0846074	0.779336	-4.39849
SLC2A5	0.209423	-3.29486e-16	1.7372	0.0847949	0.779485	-4.40012
KRTAP5-2	0.170232	7.879e-17	1.7369	0.0848486	0.779497	-4.40058
GAD1	0.125947	5.01391e-17	1.73673	0.0848779	0.779497	-4.40084
CHST3	0.196992	-1.43255e-17	1.73663	0.0848949	0.779497	-4.40098
IGKV2-29	0.250741	-1.07441e-16	1.73655	0.0849104	0.779497	-4.40112
EPAS1	0.197324	5.01391e-17	1.73439	0.0852941	0.780848	-4.40444
ARID5A	0.14347	3.86787e-16	1.73399	0.0853657	0.780848	-4.40505
UBE2QL1	0.138617	-1.43255e-17	1.73329	0.0854894	0.781397	-4.40612
PCSK5	0.267527	-8.23714e-17	1.73268	0.0855989	0.781613	-4.40706
KATNBL1P3	0.146946	-1.68324e-16	1.73212	0.0856983	0.781636	-4.40791
ADGRB1	0.118938	2.79346e-16	1.7313	0.0858451	0.781636	-4.40917
SETP12	0.138306	1.37883e-16	1.73123	0.0858571	0.781636	-4.40928
HMGN2P13	0.155404	9.31155e-17	1.73107	0.0858871	0.781636	-4.40953
SETP20	0.114809	1.11022e-16	1.73078	0.0859385	0.781636	-4.40997
ZNF420	0.172011	3.58136e-17	1.73052	0.0859853	0.781636	-4.41037
ASB4	0.209768	7.16273e-17	1.73026	0.086031	0.781636	-4.41076
TGM7	0.132667	9.31155e-17	1.73016	0.0860489	0.781636	-4.41092
CCDC144NL-AS1	0.178225	-5.37205e-17	1.72981	0.086112	0.781636	-4.41146
BPIFA1	0.157364	3.22323e-17	1.72931	0.0862027	0.781636	-4.41223
OR5G4P	0.188868	-8.23714e-17	1.7281	0.0864193	0.782206	-4.41407
MS4A14	0.215456	-1.70115e-16	1.72792	0.0864512	0.782206	-4.41434
CACYBPP1	0.109514	-3.65299e-16	1.72771	0.0864893	0.782206	-4.41467
NR2F2-AS1	0.151649	-7.16273e-18	1.72767	0.0864965	0.782206	-4.41473
IGKV5-2	0.157161	-2.86509e-17	1.7275	0.086527	0.782206	-4.41499
SPRR1A	0.21755	-1.0386e-16	1.72722	0.0865777	0.782206	-4.41542
BDKRB1	0.214086	4.01113e-16	1.72714	0.0865918	0.782206	-4.41554
SLC39A12	0.14174	1.36092e-16	1.72665	0.0866801	0.782206	-4.41629
BIN2	0.206518	-2.79346e-16	1.7266	0.0866896	0.782206	-4.41637
GXYLT2	0.287415	-3.43811e-16	1.72657	0.0866953	0.782206	-4.41642
MIPOL1	0.215137	1.39673e-16	1.7253	0.0869237	0.782867	-4.41835
OR7E53P	0.126653	4.22601e-16	1.72528	0.0869282	0.782867	-4.41839
SSX3	0.175153	1.07441e-16	1.72462	0.0870472	0.782867	-4.41939
KLF2	0.190811	-1.86231e-16	1.72437	0.0870918	0.782867	-4.41977
C2orf76	0.289801	5.73018e-17	1.72337	0.0872744	0.782873	-4.42131
ADAMTSL3	0.12226	8.95341e-18	1.72297	0.0873458	0.783113	-4.42191
PAPLN	0.175881	1.75487e-16	1.72216	0.0874932	0.783707	-4.42315
CIRBP	0.232538	-3.72462e-16	1.72182	0.0875557	0.783748	-4.42367
GOLGA8N	0.300749	-8.95341e-17	1.72166	0.0875839	0.783748	-4.42391
LEXM	0.134811	1.39673e-16	1.72076	0.0877491	0.784248	-4.42529
PITPNA	0.186459	-1.93394e-16	1.72051	0.0877937	0.784248	-4.42566
FGD6	0.257593	-3.11579e-16	1.71941	0.0879951	0.785368	-4.42734
NBPF12	0.124347	-5.01391e-17	1.71842	0.0881761	0.785966	-4.42885
C16orf89	0.111384	3.50974e-16	1.71768	0.0883105	0.785966	-4.42997
MT1E	0.310454	-4.65577e-17	1.71766	0.0883149	0.785966	-4.43001
PRR23C	0.163926	8.59528e-17	1.71762	0.0883218	0.785966	-4.43006
NLRP12	0.164405	7.879e-17	1.71731	0.0883787	0.785966	-4.43054
TPRKBP1	0.144097	4.65577e-17	1.71614	0.0885935	0.786571	-4.43232
KRT19P3	0.13324	-5.01391e-17	1.71595	0.0886288	0.786571	-4.43261
PFN4	0.147231	1.21766e-16	1.71568	0.0886772	0.786571	-4.43301
LIMA1	0.277479	2.65021e-16	1.71525	0.0887561	0.787015	-4.43366
ITLN1	0.293012	-4.01113e-16	1.71503	0.0887978	0.787061	-4.43401
RAI14	0.224726	3.65299e-16	1.71479	0.0888413	0.787061	-4.43436
KLHDC1	0.170597	1.36092e-16	1.71412	0.0889651	0.787061	-4.43539
USP38	0.21067	-8.95341e-17	1.71344	0.0890895	0.787159	-4.43641
C8orf58	0.154271	-2.75765e-16	1.71256	0.0892522	0.788087	-4.43775
HMGB1P38	0.15367	-1.43255e-16	1.71011	0.0897067	0.789836	-4.44147
HNRNPRP1	0.139558	-7.52087e-17	1.70922	0.0898708	0.790226	-4.44281
OR51I2	0.127786	2.50696e-17	1.70802	0.0900944	0.791173	-4.44463
PLA2G7	0.277116	-1.8265e-16	1.70703	0.090278	0.79187	-4.44612
SLC22A13	0.148103	-1.91603e-16	1.70666	0.090348	0.792012	-4.44669
CCND3	0.194652	2.11301e-16	1.70657	0.0903639	0.792012	-4.44682
GCH1	0.150953	3.22323e-17	1.70567	0.0905334	0.792383	-4.44819
DNM1P31	0.136613	-2.75765e-16	1.70562	0.0905412	0.792383	-4.44825
TMEM106A	0.242346	-4.29764e-17	1.70557	0.0905514	0.792383	-4.44833
ZNF438	0.298383	2.93672e-16	1.70529	0.0906046	0.79243	-4.44876
HCG4B	0.187247	1.98766e-16	1.70497	0.0906643	0.792609	-4.44925
TIFA	0.182611	1.91603e-16	1.70428	0.0907929	0.792781	-4.45028
MTND2P7	0.118407	-1.96975e-17	1.70401	0.0908435	0.792781	-4.45069
KCNC3	0.185723	-1.36092e-16	1.70372	0.0908982	0.792781	-4.45113
ASB14	0.164937	9.13248e-17	1.7036	0.0909199	0.792781	-4.45131
RGL2	0.194903	-3.4023e-16	1.70335	0.090968	0.792781	-4.45169
HLA-DQB1	0.231518	-2.29207e-16	1.7033	0.0909772	0.792781	-4.45177
PCNP	0.128921	3.58136e-16	1.70316	0.0910028	0.792781	-4.45197
GAS7	0.202657	-1.28929e-16	1.70267	0.091094	0.792781	-4.45271
SNORD81	0.195754	-1.96975e-16	1.70247	0.0911319	0.792781	-4.45301
MS4A7	0.249673	0	1.7021	0.091201	0.792781	-4.45357
NTF6G	0.10723	2.50696e-16	1.70199	0.0912235	0.792781	-4.45375
CYP4F60P	0.159437	-8.59528e-17	1.70193	0.0912342	0.792781	-4.45383
HRAT17	0.14909	9.13248e-17	1.70175	0.0912671	0.792781	-4.4541
TMEM101	0.124982	-2.86509e-16	1.70165	0.0912871	0.792781	-4.45426
PLA2G2F	0.167735	-4.15438e-16	1.70094	0.0914205	0.792781	-4.45532
BIN2P1	0.142973	-1.25348e-16	1.7009	0.0914274	0.792781	-4.45538
A2ML1	0.149618	3.58136e-17	1.70053	0.0914981	0.792781	-4.45594
TTLL7	0.235938	1.96975e-17	1.70036	0.0915296	0.792781	-4.4562
LHB	0.111649	-9.31155e-17	1.70009	0.0915812	0.792781	-4.45661
AICDA	0.129206	-8.59528e-17	1.70005	0.0915872	0.792781	-4.45666
KBTBD12	0.13546	1.46836e-16	1.70005	0.0915886	0.792781	-4.45667
REXO1L10P	0.181402	-7.52087e-17	1.70001	0.0915948	0.792781	-4.45672
ADAMTS9-AS2	0.212226	8.95341e-17	1.6998	0.0916343	0.792781	-4.45703
MMP24	0.157517	-6.80459e-17	1.69976	0.0916422	0.792781	-4.4571
ABTB1	0.144558	9.31155e-17	1.69931	0.091728	0.792907	-4.45778
COL4A2-AS2	0.140853	1.0386e-16	1.69869	0.0918455	0.792907	-4.45872
TUBB1	0.155459	1.86231e-16	1.69852	0.0918776	0.792907	-4.45897
PP12613	0.165233	1.19976e-16	1.69851	0.091878	0.792907	-4.45898
CASC23	0.125574	8.95341e-17	1.69769	0.0920331	0.792907	-4.46021
CCNY	0.188212	2.32789e-16	1.69723	0.0921206	0.792907	-4.4609
ITPR2	0.180715	-8.23714e-17	1.6968	0.0922022	0.792907	-4.46155
KCNA7	0.130953	1.0386e-16	1.6965	0.0922591	0.792907	-4.462
HLA-DQB2	0.148714	4.15438e-16	1.69627	0.0923033	0.792907	-4.46235
NCOA1	0.235034	-4.22601e-16	1.69582	0.0923887	0.792907	-4.46303
FGF12-AS1	0.129074	-3.61718e-16	1.69555	0.0924397	0.792907	-4.46343
HBA1	0.265158	8.59528e-17	1.69554	0.0924412	0.792907	-4.46344
TRAV38-1	0.111274	1.39673e-16	1.69528	0.092492	0.792907	-4.46384
KLHL32	0.11677	-1.39673e-16	1.69519	0.0925083	0.792907	-4.46397
CASP8	0.214123	-1.79068e-17	1.69517	0.0925124	0.792907	-4.464
GXYLT1	0.168385	-6.44646e-17	1.6945	0.0926406	0.79347	-4.46502
SSBP3-AS1	0.137188	8.41621e-17	1.69438	0.0926625	0.79347	-4.46519
LEF1-AS1	0.193118	-1.14604e-16	1.69428	0.092681	0.79347	-4.46534
CD1C	0.12952	-2.82928e-16	1.69361	0.0928102	0.794104	-4.46635
MTATP6P11	0.322273	-1.12813e-16	1.69333	0.0928619	0.794104	-4.46676
RPEP2	0.152954	1.07441e-16	1.69313	0.0929004	0.794104	-4.46706
ITGA11	0.161519	-1.14604e-16	1.69248	0.0930241	0.794912	-4.46804
SEC22C	0.147663	1.79068e-16	1.69165	0.0931833	0.795774	-4.46928
ACP2	0.240494	2.6144e-16	1.69127	0.0932566	0.796036	-4.46986
RNF126	0.159009	-4.01113e-16	1.6911	0.0932888	0.796036	-4.47011
SIK1	0.315795	-3.97531e-16	1.69003	0.0934948	0.79669	-4.47172
SNORA70	0.194652	-1.5758e-16	1.68867	0.0937555	0.797786	-4.47375
CXCL16	0.35271	5.73018e-17	1.68738	0.0940036	0.797786	-4.47568
CD68	0.200746	2.72184e-16	1.68656	0.0941616	0.797786	-4.47691
VIPR1-AS1	0.144068	1.00278e-16	1.68605	0.0942593	0.797786	-4.47766
MCEMP1	0.159711	-2.6144e-16	1.68561	0.0943446	0.797786	-4.47832
EMC10	0.119064	-6.44646e-17	1.68535	0.0943949	0.797786	-4.47871
KIF13B	0.137339	7.16273e-17	1.68532	0.0944019	0.797786	-4.47877
GTF2H1	0.201244	1.79068e-17	1.68508	0.0944472	0.797786	-4.47912
PGM1	0.222582	4.36926e-16	1.68497	0.0944686	0.797786	-4.47928
AQP2	0.144834	-3.9395e-17	1.6843	0.0945978	0.797786	-4.48028
ADCY2	0.160037	-1.59371e-16	1.68427	0.0946042	0.797786	-4.48033
SLC16A4	0.245939	2.93672e-16	1.684	0.0946557	0.797786	-4.48073
TRAV8-3	0.178879	-1.11022e-16	1.68376	0.0947026	0.797786	-4.48109
IGHV3-54	0.13173	2.3637e-16	1.68369	0.094717	0.797786	-4.4812
CT47A12	0.143564	-2.57858e-16	1.68358	0.0947386	0.797786	-4.48136
CT47A10	0.143564	-2.57858e-16	1.68358	0.0947386	0.797786	-4.48136
CT47A9	0.143564	-2.57858e-16	1.68358	0.0947386	0.797786	-4.48136
CT47A6	0.143564	-2.57858e-16	1.68358	0.0947386	0.797786	-4.48136
CT47A3	0.143564	-2.57858e-16	1.68358	0.0947386	0.797786	-4.48136
CT47A2	0.143564	-2.57858e-16	1.68358	0.0947386	0.797786	-4.48136
CST7	0.176691	-2.79346e-16	1.68272	0.0949054	0.797786	-4.48265
LSM3P4	0.12816	-1.64743e-16	1.68188	0.0950687	0.797786	-4.4839
HRH2	0.207277	-1.0565e-16	1.68185	0.0950742	0.797786	-4.48394
KRI1	0.141141	-3.1516e-16	1.68147	0.0951488	0.797786	-4.48451
IGHV3-33-2	0.109899	-2.29207e-16	1.68139	0.0951639	0.797786	-4.48463
TDRD3	0.27273	3.29486e-16	1.68054	0.0953282	0.797786	-4.48589
CTXN2	0.170238	1.48627e-16	1.68018	0.0953985	0.797786	-4.48642
CCDC97	0.11812	3.86787e-16	1.68001	0.0954319	0.797786	-4.48668
FAM90A23P	0.13787	3.58136e-17	1.67982	0.0954686	0.797786	-4.48696
NRBP1	0.196316	4.08276e-16	1.67969	0.0954955	0.797786	-4.48717
TPTEP1	0.13848	1.50417e-16	1.67942	0.0955472	0.797786	-4.48756
FLYWCH2	0.092078	-1.79068e-16	1.6793	0.0955716	0.797786	-4.48775
PLD6	0.188877	7.16273e-17	1.67923	0.0955852	0.797786	-4.48785
C2CD4B	0.151888	-3.86787e-16	1.67903	0.0956245	0.797786	-4.48815
ACTA1	0.215783	1.07441e-17	1.67856	0.0957165	0.797786	-4.48885
UNC93B2	0.135638	-3.04416e-16	1.6785	0.0957273	0.797786	-4.48893
GPR34	0.344462	-2.57858e-16	1.67778	0.0958673	0.798242	-4.49
HNRNPMP1	0.136877	-3.54555e-16	1.67777	0.0958697	0.798242	-4.49001
CYSLTR1	0.176875	1.21766e-16	1.677	0.0960215	0.799018	-4.49117
ADCY9	0.125278	-3.68881e-16	1.67641	0.0961364	0.799102	-4.49204
STEAP2	0.328972	-3.90369e-16	1.67635	0.0961486	0.799102	-4.49213
ESYT2	0.197105	-1.14604e-16	1.67597	0.0962228	0.799106	-4.49269
PCGF3	0.163445	5.01391e-17	1.6758	0.0962565	0.799106	-4.49295
HSPBP1	0.123928	1.36092e-16	1.67544	0.0963279	0.799106	-4.49349
BCL11B	0.144413	-3.65299e-16	1.67527	0.0963611	0.799106	-4.49374
ARHGAP26-IT1	0.146443	-2.00556e-16	1.67496	0.0964218	0.799106	-4.4942
RPA2P1	0.135233	1.96975e-16	1.67441	0.0965296	0.799106	-4.49501
RPLP2P1	0.130992	-5.73018e-17	1.67403	0.0966053	0.799324	-4.49558
IRGC	0.112432	2.04138e-16	1.67386	0.096639	0.799324	-4.49584
UGP2	0.145502	3.1516e-16	1.67358	0.0966934	0.799324	-4.49625
AHNAK	0.183357	-1.86231e-16	1.6732	0.0967684	0.799324	-4.49681
AVPR1A	0.173666	1.07441e-16	1.67298	0.096812	0.799324	-4.49714
SYT14	0.122932	-2.68602e-17	1.67252	0.0969014	0.79946	-4.49781
GRIN2A	0.135861	1.09232e-16	1.67248	0.0969097	0.79946	-4.49787
OR4F7P	0.184835	-3.22323e-17	1.67241	0.0969238	0.79946	-4.49798
RPSAP5	0.135177	-9.66968e-17	1.67187	0.0970308	0.799502	-4.49878
RPL7AP25	0.123419	-2.14882e-16	1.67154	0.097096	0.799502	-4.49927
ATP6V1E1	0.240134	4.22601e-16	1.67142	0.0971204	0.799502	-4.49945
SLC6A1-AS1	0.10342	1.0565e-16	1.67111	0.097182	0.799502	-4.49991
SPATA19	0.137124	-9.49062e-17	1.67096	0.0972116	0.799502	-4.50013
TRBV6-1	0.132204	-1.79068e-17	1.67073	0.0972558	0.799502	-4.50047
MTND6P8	0.119432	2.14882e-16	1.67063	0.0972756	0.799502	-4.50061
FAM180A	0.166752	-1.64743e-16	1.66991	0.0974183	0.799502	-4.50168
LAT2	0.14914	3.29486e-16	1.66982	0.0974373	0.799502	-4.50182
KIAA1755	0.159054	1.79068e-16	1.66957	0.0974869	0.799502	-4.50219
TRAJ51	0.155305	8.59528e-17	1.66944	0.0975112	0.799502	-4.50237
RNF121	0.124044	7.16273e-18	1.66903	0.0975937	0.799911	-4.50299
SPECC1L	0.196084	1.93394e-16	1.6687	0.0976588	0.799928	-4.50347
RPS6KL1	0.145136	-3.1516e-16	1.66844	0.0977104	0.799928	-4.50386
GGACT	0.165319	-2.07719e-16	1.66837	0.0977248	0.799928	-4.50397
DENND5A	0.181434	-5.01391e-17	1.66802	0.0977947	0.799928	-4.50449
MCAT	0.131383	-1.07441e-17	1.66768	0.0978626	0.799928	-4.50499
MTCO1P11	0.359495	2.18463e-16	1.66755	0.0978888	0.799928	-4.50518
RASSF10	0.112926	9.31155e-17	1.66667	0.0980622	0.800062	-4.50647
DPRXP3	0.195608	2.07719e-16	1.66647	0.0981037	0.800062	-4.50678
TMEM199	0.175649	4.36926e-16	1.66643	0.0981103	0.800062	-4.50683
CHODL	0.131837	1.79068e-16	1.66604	0.0981896	0.800364	-4.50742
LNX1-AS2	0.150167	1.53999e-16	1.66542	0.0983134	0.800364	-4.50833
KLK15	0.156368	-3.65299e-16	1.66529	0.0983382	0.800364	-4.50851
FAM27B	0.158911	2.29207e-16	1.66522	0.0983526	0.800364	-4.50862
GIT2	0.196825	-1.46836e-16	1.66405	0.0985863	0.800454	-4.51035
ESPN	0.15225	1.79068e-16	1.66405	0.0985867	0.800454	-4.51035
RPL23AP53	0.17032	-4.29764e-16	1.66379	0.0986384	0.800542	-4.51073
TPRG1L	0.109166	1.43255e-16	1.66334	0.0987299	0.800615	-4.5114
IL10RA	0.247481	-9.31155e-17	1.66304	0.0987894	0.800615	-4.51184
MUC4	0.314893	-7.879e-17	1.66303	0.0987902	0.800615	-4.51185
TSPAN16	0.166948	5.73018e-17	1.6621	0.0989769	0.801007	-4.51322
ULBP2	0.213574	2.50696e-16	1.66181	0.0990352	0.801007	-4.51365
BCL2L2-PABPN1	0.148344	-8.59528e-17	1.6618	0.0990378	0.801007	-4.51367
C1orf74	0.148076	8.23714e-17	1.66175	0.0990477	0.801007	-4.51374
DUX4L45	0.104257	6.44646e-17	1.66124	0.0991506	0.801256	-4.51449
NINL	0.207133	1.79068e-16	1.65995	0.0994097	0.801797	-4.51639
SEMA3B	0.187339	2.86509e-17	1.65934	0.0995327	0.802531	-4.51729
PPP1R12A	0.204153	-3.79625e-16	1.6584	0.0997227	0.802992	-4.51867
UPK3A	0.11685	-3.9395e-16	1.65838	0.0997282	0.802992	-4.51871
BOD1P1	0.129862	-2.86509e-17	1.6581	0.0997842	0.803016	-4.51912
FKBP15	0.195807	-3.25904e-16	1.65804	0.0997961	0.803016	-4.5192
MFSD1	0.237941	2.47114e-16	1.65739	0.0999276	0.803143	-4.52016
MAP3K6	0.156409	8.59528e-17	1.65734	0.0999371	0.803143	-4.52023
MGARP	0.189439	8.05807e-17	1.65715	0.0999763	0.803143	-4.52051
ZBTB11-AS1	0.146697	2.93672e-16	1.65675	0.100057	0.803158	-4.5211
WASF5P	0.144809	-1.18185e-16	1.65631	0.100146	0.803158	-4.52174
GAPLINC	0.152785	1.07441e-17	1.65592	0.100225	0.803158	-4.52232
AP2M1	0.217548	-2.11301e-16	1.65585	0.10024	0.803158	-4.52243
SLC39A1	0.129067	3.04416e-16	1.65462	0.100489	0.803158	-4.52423
PLPP3	0.266246	-1.79068e-16	1.65431	0.100553	0.803158	-4.52469
NECAP2	0.107689	-4.08276e-16	1.65421	0.100573	0.803158	-4.52483
C2CD2	0.242039	-2.75765e-16	1.65396	0.100624	0.803158	-4.5252
DDX20	0.0980581	1.34301e-16	1.65389	0.100639	0.803158	-4.52531
BHLHA15	0.178292	-2.86509e-16	1.65381	0.100655	0.803158	-4.52542
BNIP3P19	0.118937	3.22323e-16	1.65336	0.100747	0.803158	-4.52609
SRY	0.145298	6.80459e-17	1.65333	0.100752	0.803158	-4.52612
TUBB8P10	0.120172	-1.14604e-16	1.65323	0.100773	0.803158	-4.52627
RPL7AP66	0.187491	4.29764e-17	1.65308	0.100803	0.803158	-4.52649
TULP2	0.10425	1.79068e-16	1.65303	0.100814	0.803158	-4.52657
SPATA31A6	0.125976	4.29764e-17	1.65282	0.100857	0.803158	-4.52688
SV2B	0.179559	9.66968e-17	1.65271	0.100879	0.803158	-4.52704
UNC5A	0.131211	-1.07441e-17	1.65271	0.10088	0.803158	-4.52704
RNF150	0.225496	-5.55112e-17	1.65253	0.100916	0.803158	-4.5273
CHSY1	0.207878	-7.879e-17	1.65249	0.100924	0.803158	-4.52736
SRD5A1	0.152959	3.58136e-17	1.65222	0.100979	0.803158	-4.52775
ATP2B4	0.254563	-2.50696e-16	1.65178	0.101068	0.803158	-4.52839
DVL3	0.130207	1.28929e-16	1.65175	0.101074	0.803158	-4.52844
CSDE1	0.223787	3.00835e-16	1.65173	0.101079	0.803158	-4.52847
SCUBE2	0.175718	-1.59371e-16	1.65143	0.101141	0.803382	-4.52892
SSH1	0.138406	-2.29207e-16	1.65122	0.101183	0.803382	-4.52922
TRERNA1	0.0979015	-5.73018e-17	1.65092	0.101245	0.803382	-4.52966
SH3BGRL	0.193009	-4.29764e-17	1.65087	0.101254	0.803382	-4.52973
POT1-AS1	0.173472	4.29764e-17	1.65065	0.101299	0.803506	-4.53005
HSPA4L	0.599199	-1.66533e-16	1.64988	0.101458	0.803513	-4.53118
TNFRSF14	0.164534	1.0386e-16	1.64984	0.101465	0.803513	-4.53124
SLC25A51	0.160792	1.28929e-16	1.64953	0.101529	0.803513	-4.53169
ARRDC5	0.132818	1.79068e-17	1.64918	0.1016	0.803513	-4.5322
CEP126	0.173385	1.66533e-16	1.64873	0.101693	0.803513	-4.53286
UBTD2	0.209905	1.68324e-16	1.64864	0.101712	0.803513	-4.533
OIP5-AS1	0.167636	-2.00556e-16	1.64731	0.101984	0.803674	-4.53494
CCL11	0.154318	1.53999e-16	1.64728	0.101991	0.803674	-4.53498
MECR	0.182109	2.3637e-16	1.64709	0.102032	0.803674	-4.53527
GAL3ST4	0.147631	-1.00278e-16	1.64538	0.102383	0.803674	-4.53776
IGFL3	0.158539	-1.0386e-16	1.64508	0.102445	0.803674	-4.5382
TRIM52	0.169579	4.40508e-16	1.64475	0.102513	0.803674	-4.53868
CCPG1	0.226849	-1.50417e-16	1.64454	0.102557	0.803674	-4.53899
KLHL28	0.14247	-1.28929e-16	1.64451	0.102562	0.803674	-4.53903
P2RY6	0.151964	1.64743e-16	1.64405	0.102659	0.803674	-4.53971
ERMAP	0.219597	2.00556e-16	1.64365	0.102741	0.803674	-4.54029
MAPKBP1	0.168976	2.97253e-16	1.64363	0.102744	0.803674	-4.54031
MYH9	0.230145	-1.79068e-17	1.64344	0.102784	0.803674	-4.54059
FXYD4	0.164359	5.01391e-17	1.6434	0.102792	0.803674	-4.54065
LARGE-IT1	0.240131	1.53999e-16	1.64313	0.102848	0.803879	-4.54104
CTC1	0.201203	7.879e-17	1.64239	0.103001	0.804335	-4.54212
CNN2P12	0.121805	1.53999e-16	1.64228	0.103025	0.804335	-4.54229
CSRP3	0.143053	6.80459e-17	1.64214	0.103053	0.804335	-4.54248
CHMP5	0.248157	-2.29207e-16	1.64187	0.103111	0.804485	-4.54289
MTATP6P20	0.157993	-9.84875e-17	1.64151	0.103185	0.804485	-4.54341
GTF2IP8	0.153349	-1.64743e-16	1.64149	0.103189	0.804485	-4.54343
HOTAIRM1	0.27675	1.79068e-16	1.64134	0.10322	0.804489	-4.54366
FURIN	0.210289	3.97531e-16	1.64119	0.103251	0.804497	-4.54387
DUSP10	0.268125	3.18741e-16	1.64024	0.103448	0.805646	-4.54525
CST13P	0.14002	9.66968e-17	1.63953	0.103596	0.805726	-4.54629
KEL	0.106172	-1.89812e-16	1.63937	0.103629	0.805726	-4.54652
OR2AM1P	0.136756	8.59528e-17	1.63893	0.103722	0.805726	-4.54717
ITGB2	0.197924	2.97253e-16	1.63778	0.103961	0.805726	-4.54883
MON1A	0.166447	9.31155e-17	1.63768	0.103983	0.805726	-4.54898
TRAJ5	0.204339	-2.86509e-16	1.63743	0.104035	0.805726	-4.54934
EMILIN2	0.136912	-3.65299e-16	1.63722	0.104079	0.805726	-4.54965
RHOB	0.18556	-4.01113e-16	1.63692	0.104142	0.805726	-4.55009
WDR20	0.156432	-2.75765e-16	1.63606	0.104323	0.805726	-4.55134
PDE10A	0.265983	-9.31155e-17	1.63588	0.104359	0.805726	-4.55159
VEPH1	0.268188	1.59371e-16	1.63559	0.104421	0.805726	-4.55202
ANKRD34C	0.12854	5.73018e-17	1.6355	0.104439	0.805726	-4.55214
FBXO36	0.126686	-1.3251e-16	1.63542	0.104456	0.805726	-4.55227
MRFAP1	0.171339	1.28929e-16	1.63517	0.104508	0.805726	-4.55262
OR51E2	0.178185	1.46836e-16	1.63514	0.104514	0.805726	-4.55266
COX20P2	0.134194	-1.41464e-16	1.63478	0.10459	0.805726	-4.55319
CLIC6	0.17818	2.50696e-17	1.63448	0.104653	0.805726	-4.55362
TCEAL8	0.167707	3.1516e-16	1.63432	0.104687	0.805726	-4.55386
IGHV3-29	0.134443	-2.11301e-16	1.63341	0.104879	0.805726	-4.55518
LBX2	0.118537	-2.50696e-16	1.63298	0.104969	0.805726	-4.55581
ZNF320	0.123469	-4.29764e-16	1.6325	0.10507	0.805726	-4.5565
TMEM218	0.145688	1.00278e-16	1.63229	0.105115	0.805726	-4.55681
CACFD1	0.157221	-9.31155e-17	1.63206	0.105163	0.805726	-4.55714
RNF11	0.206046	-1.28929e-16	1.63188	0.105201	0.805726	-4.5574
RPL32P1	0.159832	1.43255e-17	1.6314	0.105303	0.805726	-4.5581
COX18	0.226612	-6.44646e-17	1.63128	0.105328	0.805726	-4.55827
KRT76	0.138412	-3.61718e-16	1.63117	0.105351	0.805726	-4.55843
BDKRB2	0.134857	-1.36092e-16	1.63093	0.105402	0.805726	-4.55878
BLOC1S5-TXNDC5	0.138626	-2.72184e-16	1.6309	0.105407	0.805726	-4.55881
MTRNR2L11	0.156646	1.86231e-16	1.63078	0.105433	0.805726	-4.55899
STK17B	0.268225	3.18741e-16	1.63008	0.105581	0.805876	-4.56
MT1HL1	0.133483	1.5758e-16	1.62993	0.105612	0.805876	-4.56022
GP2	0.161464	-5.01391e-17	1.62851	0.105913	0.806447	-4.56227
TSC22D3	0.20457	-2.57858e-16	1.62837	0.105944	0.806447	-4.56248
ETS1	0.102997	1.28929e-16	1.62754	0.10612	0.806913	-4.56368
MTND5P32	0.262353	-8.59528e-17	1.62729	0.106173	0.806913	-4.56404
OLFML2B	0.211209	-4.15438e-16	1.6272	0.106191	0.806913	-4.56417
KCNH5	0.142458	-1.55789e-16	1.62638	0.106367	0.807667	-4.56536
CYCSP51	0.126185	-3.9395e-17	1.62626	0.106392	0.807667	-4.56553
REC114	0.121204	-1.79068e-16	1.62593	0.106463	0.807667	-4.56601
COPS8P2	0.178593	-3.79625e-16	1.6259	0.106468	0.807667	-4.56604
PEA15	0.246797	3.58136e-17	1.62339	0.107004	0.808774	-4.56966
IER2	0.241621	7.16273e-17	1.62275	0.107141	0.808774	-4.57059
CDT1	0.13991	-3.72462e-16	1.62273	0.107146	0.808774	-4.57062
CACNB2	0.142014	-8.59528e-17	1.62224	0.10725	0.808774	-4.57132
LIX1L	0.172329	2.90091e-16	1.62204	0.107293	0.808774	-4.57161
NEU2	0.153202	-3.79625e-16	1.62199	0.107304	0.808774	-4.57168
KDSR	0.206787	8.23714e-17	1.62167	0.107374	0.808774	-4.57215
USP32	0.152942	-1.14604e-16	1.62134	0.107444	0.808774	-4.57262
GAPT	0.163146	-5.01391e-17	1.62062	0.107598	0.809712	-4.57365
PRSS37	0.144691	2.32789e-17	1.61992	0.107749	0.809761	-4.57467
TAC4	0.112643	-1.43255e-17	1.61942	0.107856	0.809761	-4.57538
MEFV	0.179095	-3.29486e-16	1.61922	0.107899	0.809761	-4.57567
AP3D1	0.185494	1.68324e-16	1.6192	0.107905	0.809761	-4.57571
CYCSP28	0.112689	3.22323e-16	1.61869	0.108014	0.809761	-4.57644
ZNF528-AS1	0.208358	1.5758e-16	1.61866	0.108021	0.809761	-4.57648
C7	0.17563	-1.39673e-16	1.61834	0.108088	0.809761	-4.57693
PPP3CC	0.193311	-7.52087e-17	1.61767	0.108234	0.809761	-4.5779
BEAN1-AS1	0.184123	-1.75487e-16	1.61731	0.108311	0.809761	-4.57841
SNORA69	0.248323	-1.00278e-16	1.61699	0.10838	0.809761	-4.57887
OR5W1P	0.123308	1.21766e-16	1.61691	0.108398	0.809761	-4.57899
GNS	0.317129	3.04416e-16	1.6162	0.10855	0.809761	-4.58001
P2RY1	0.141654	1.07441e-16	1.61562	0.108678	0.809761	-4.58085
KCNC2	0.1374	1.43255e-16	1.61536	0.108734	0.809761	-4.58122
KLHL14	0.145753	1.07441e-17	1.61529	0.108749	0.809761	-4.58132
TOMM40L	0.150932	-7.879e-17	1.61502	0.108808	0.809761	-4.58171
DLL1	0.142659	-2.50696e-17	1.61491	0.108832	0.809761	-4.58187
ABHD6	0.170789	-1.79068e-16	1.61418	0.108989	0.809761	-4.58291
TPM2	0.153747	4.15438e-16	1.61408	0.109012	0.809761	-4.58306
ECT2	0.124413	4.65577e-17	1.61406	0.109014	0.809761	-4.58308
ZNF34	0.117391	-2.14882e-17	1.61381	0.10907	0.809761	-4.58344
FAM90A8P	0.146177	2.47114e-16	1.61348	0.109142	0.809761	-4.58392
EIF5A2	0.18271	-3.22323e-16	1.61307	0.109231	0.809761	-4.58451
ARL5AP1	0.124451	1.79068e-16	1.61302	0.109242	0.809761	-4.58458
PLA2G2A	0.380466	1.11022e-16	1.61238	0.109382	0.809761	-4.5855
EFHC1	0.180798	9.31155e-17	1.61218	0.109425	0.809761	-4.58578
SLC15A5	0.125319	-1.79068e-17	1.61216	0.109428	0.809761	-4.5858
GGT5	0.146015	0	1.612	0.109463	0.809761	-4.58603
TMEM132E	0.13265	2.93672e-16	1.6117	0.109529	0.809761	-4.58647
ZNF222	0.131548	-2.22045e-16	1.61104	0.109673	0.810194	-4.58741
PLIN4	0.124968	-2.90091e-16	1.6107	0.109748	0.810218	-4.5879
LRWD1	0.117377	2.86509e-17	1.61045	0.109802	0.810218	-4.58826
TC2N	0.307347	2.3637e-16	1.61018	0.109861	0.81025	-4.58865
GAB4	0.128206	4.08276e-16	1.60982	0.109939	0.81025	-4.58915
ARL15	0.172748	-1.8444e-16	1.6098	0.109943	0.81025	-4.58918
SUSD6	0.196531	-4.36926e-16	1.60962	0.109982	0.81025	-4.58943
KRT16	0.122578	2.43533e-16	1.60954	0.11	0.81025	-4.58956
[truncated: 25,303 more rows]

## Sheet: PP
Gene	logFC	AveExpr	t	P.Value	adj.P.Val	B
MPZ	0.630344	8.95341e-17	5.471	2.31507e-07	0.0063206	3.30559
VHLL	0.389322	-7.879e-17	4.13251	6.49553e-05	0.54105	-0.0119204
MOGAT1	0.421828	1.80859e-16	4.02561	9.74735e-05	0.54105	-0.251944
UPK3B	0.418052	-6.08832e-17	4.01943	9.97646e-05	0.54105	-0.265682
ADCYAP1R1	0.37386	3.58136e-18	4.01762	0.000100448	0.54105	-0.269716
MTRNR2L13	0.474541	1.3072e-16	3.97256	0.000118903	0.54105	-0.36945
IGLV3-6	0.409902	-1.14604e-16	3.87603	0.000169922	0.556135	-0.580497
ZNF774	0.420738	1.36092e-16	3.87267	0.000172029	0.556135	-0.58778
SYT10	0.430952	5.73018e-17	3.77736	0.000243236	0.637267	-0.792415
EPHA7	0.444139	-1.14604e-16	3.73934	0.000278808	0.637267	-0.873015
RBM15B	0.302417	-3.1516e-16	3.70815	0.000311627	0.647012	-0.938712
HNRNPA1P46	0.317127	1.86231e-16	3.6592	0.000370591	0.647012	-1.04097
EFNA2	0.49283	-1.46836e-16	3.65748	0.00037285	0.647012	-1.04456
SUV39H1	0.354647	-3.22323e-16	3.60538	0.000447558	0.655126	-1.15227
KNDC1	0.500971	-1.8265e-16	3.59821	0.00045888	0.655126	-1.167
MMP15	0.461019	-2.07719e-16	3.58413	0.000481921	0.655126	-1.19588
MYCL	0.333759	7.16273e-18	3.57127	0.000503906	0.655126	-1.22218
FAM124A	0.27187	0	3.45957	0.000738888	0.704171	-1.44758
WFDC6	0.385596	3.22323e-17	3.45866	0.00074117	0.704171	-1.44939
GSTA10P	0.373733	-8.77434e-17	3.44722	0.000770433	0.704171	-1.47218
TBX18	0.468224	-1.93394e-16	3.43776	0.00079543	0.704171	-1.49096
SUN3	0.383693	1.79068e-17	3.4282	0.000821473	0.704171	-1.50991
SCRT1	0.369769	-1.28929e-16	3.42343	0.000834776	0.704171	-1.51935
PHBP11	0.372421	2.86509e-16	3.40965	0.00087432	0.704171	-1.54657
SMTNL1	0.286626	-2.86509e-17	3.39631	0.00091427	0.704171	-1.57283
CES1	0.318718	1.14604e-16	3.39409	0.000921074	0.704171	-1.57719
SLC6A3	0.378344	3.43811e-16	3.39045	0.000932358	0.704171	-1.58434
DSCR9	0.342835	-1.61161e-16	3.35394	0.00105279	0.704171	-1.65572
MIMT1	0.440884	9.31155e-17	3.34491	0.00108473	0.704171	-1.67327
CYP4F24P	0.341372	-3.36648e-16	3.32929	0.00114217	0.704171	-1.70356
PPP1R2P2	0.328779	3.76043e-16	3.32652	0.00115267	0.704171	-1.70893
IL36A	0.39495	-1.36092e-16	3.31588	0.00119373	0.704171	-1.72947
STMN1P1	0.376121	-6.26739e-17	3.31584	0.00119388	0.704171	-1.72955
FAUP2	0.397619	3.9395e-17	3.30958	0.00121871	0.704171	-1.74162
MSN	0.414104	1.5758e-16	3.30125	0.00125246	0.704171	-1.75765
TMTC4	0.403843	3.47392e-16	3.3009	0.00125392	0.704171	-1.75834
CYP4F12	0.482623	-2.50696e-17	3.26722	0.0013997	0.704171	-1.82283
DGCR12	0.430733	-1.36092e-16	3.26232	0.00142219	0.704171	-1.83217
PABPC1L2B	0.339001	-2.50696e-17	3.24754	0.00149207	0.704171	-1.86028
PRPH	0.351533	2.14882e-16	3.23782	0.00153975	0.704171	-1.87871
TBL1XR1-AS1	0.344684	2.20254e-16	3.23722	0.00154273	0.704171	-1.87984
MTND3P7	0.324308	8.23714e-17	3.22547	0.00160236	0.704171	-1.90206
ISX	0.350411	2.57858e-16	3.22073	0.00162705	0.704171	-1.91101
CSRP3	0.35339	6.80459e-17	3.21466	0.00165915	0.704171	-1.92245
SOX1	0.392518	1.21766e-16	3.20321	0.00172132	0.704171	-1.94399
MPZL3	0.273201	-3.58136e-17	3.20225	0.00172659	0.704171	-1.94577
INMT	0.364281	3.79625e-16	3.19876	0.00174604	0.704171	-1.95233
ZNF281	0.256088	3.22323e-16	3.19743	0.00175351	0.704171	-1.95483
CYP4F10P	0.370508	1.46836e-16	3.18731	0.00181121	0.704171	-1.97378
COL5A1-AS1	0.351251	-2.00556e-16	3.17756	0.00186846	0.704171	-1.99198
EN2	0.331274	-2.18463e-16	3.17518	0.00188274	0.704171	-1.99643
CYP4F30P	0.332138	-2.86509e-17	3.17447	0.00188701	0.704171	-1.99776
RFPL4AP6	0.291205	-1.07441e-16	3.16789	0.00192694	0.704171	-2.01
MLKL	0.370289	3.58136e-17	3.16691	0.001933	0.704171	-2.01184
ZNF213	0.303782	-4.40508e-16	3.1666	0.00193487	0.704171	-2.01241
SNAR-C3	0.700167	4.44089e-16	3.16383	0.00195198	0.704171	-2.01756
NUTM2F	0.327976	3.9395e-16	3.15245	0.00202386	0.704171	-2.0387
CETN1	0.337277	3.65299e-16	3.14585	0.00206664	0.704171	-2.05092
NPHS2	0.405138	4.29764e-17	3.14211	0.00209123	0.704171	-2.05783
FAM153A	0.356153	-1.68324e-16	3.13356	0.00214851	0.704171	-2.07362
PTPRD	0.793157	8.41621e-17	3.13222	0.00215764	0.704171	-2.0761
ZNF750	0.431993	-1.96975e-17	3.12726	0.00219169	0.704171	-2.08525
USP17L10	0.360473	-2.32789e-17	3.12681	0.00219477	0.704171	-2.08607
HNRNPH1P2	0.279732	-7.52087e-17	3.12415	0.00221326	0.704171	-2.09097
BCL7A	0.415125	5.01391e-17	3.1169	0.00226441	0.704171	-2.10431
SPATA8	0.334517	-1.36092e-16	3.11662	0.00226636	0.704171	-2.10481
SNAR-C4	0.524754	7.16273e-16	3.10507	0.00235016	0.704171	-2.12601
SNAR-I	0.452678	1.50417e-16	3.10363	0.00236076	0.704171	-2.12864
ZNF733P	0.304329	5.01391e-17	3.10326	0.00236354	0.704171	-2.12933
GLOD5	0.280784	-2.72184e-16	3.09921	0.00239368	0.704171	-2.13673
CFAP99	0.342027	-3.79625e-16	3.09871	0.0023975	0.704171	-2.13765
MAFF	0.338855	-1.43255e-17	3.0977	0.0024051	0.704171	-2.1395
SNAR-G2	0.669377	1.36092e-16	3.09394	0.00243355	0.704171	-2.14637
SNAR-E	0.670519	7.44924e-16	3.09141	0.00245288	0.704171	-2.15098
TRIAP1P1	0.273248	-2.22045e-16	3.07742	0.00256239	0.704171	-2.17646
IFT27	0.422715	1.93394e-16	3.07342	0.00259458	0.704171	-2.18375
TSPAN33	0.355137	1.79068e-16	3.0723	0.00260363	0.704171	-2.18578
ZNF404	0.277741	2.32789e-17	3.07036	0.00261943	0.704171	-2.18931
FAM47C	0.316152	1.59371e-16	3.06905	0.00263007	0.704171	-2.19167
PDK3	0.419578	1.28929e-16	3.05312	0.0027635	0.704171	-2.22052
TAS2R16	0.35384	-1.91603e-16	3.05043	0.0027866	0.704171	-2.22537
FOXD4	0.369319	-1.46836e-16	3.04739	0.00281294	0.704171	-2.23086
IGLV10-67	0.299532	1.79068e-16	3.04739	0.00281302	0.704171	-2.23087
CASC21	0.620336	3.33067e-16	3.04599	0.00282516	0.704171	-2.23338
SRMP2	0.370609	-2.50696e-17	3.03982	0.00287966	0.704171	-2.24452
GAPDHP53	0.334902	-6.44646e-17	3.03935	0.00288381	0.704171	-2.24535
KLF1	0.355336	4.04694e-16	3.03227	0.00294752	0.704171	-2.25808
NPM1P50	0.333346	3.58136e-18	3.02513	0.00301314	0.704171	-2.27091
SNORD4A	0.59399	2.47114e-16	3.01607	0.00309824	0.704171	-2.28713
C2orf74	0.422177	-7.52087e-17	3.01339	0.00312394	0.704171	-2.29193
IPO9	0.339791	-4.29764e-17	3.01215	0.00313582	0.704171	-2.29414
IZUMO2	0.317012	3.58136e-17	3.00895	0.00316673	0.704171	-2.29985
MAFK	0.331667	-1.43255e-16	3.008	0.00317603	0.704171	-2.30156
ZNF729	0.37043	-1.50417e-16	3.00516	0.00320376	0.704171	-2.30662
CLDN17	0.272806	8.05807e-17	3.00422	0.00321305	0.704171	-2.3083
NR2E3	0.289053	6.80459e-17	3.00226	0.00323238	0.704171	-2.31179
REM1	0.327237	-1.79068e-16	2.99392	0.0033159	0.704171	-2.32664
MED11	0.341741	6.44646e-17	2.98986	0.0033573	0.704171	-2.33385
SNAR-D	0.448535	-7.16273e-18	2.98561	0.00340112	0.704171	-2.3414
TSPY13P	0.320939	1.89812e-16	2.98475	0.00341011	0.704171	-2.34293
KRT18P12	0.283211	2.43533e-16	2.98405	0.00341733	0.704171	-2.34416
NLRC5	0.387525	-2.86509e-17	2.98035	0.00345612	0.704171	-2.35072
SLC10A4	0.35288	-1.43255e-16	2.97138	0.00355178	0.70691	-2.3666
MDGA1	0.259252	-1.89812e-16	2.96921	0.00357526	0.70691	-2.37043
KRT8P12	0.303612	2.86509e-16	2.96169	0.00365785	0.70691	-2.3837
CLDN10	1.37186	-8.95341e-17	2.9603	0.00367333	0.70691	-2.38615
PTCSC1	0.322794	2.0951e-16	2.9569	0.00371135	0.70691	-2.39214
VENTXP1	0.22873	5.90925e-17	2.9543	0.00374072	0.70691	-2.39672
DDX11L16	0.409055	-1.50417e-16	2.95019	0.00378747	0.70691	-2.40393
C1orf94	0.295583	-5.73018e-17	2.94629	0.00383242	0.70691	-2.41078
TSPY24P	0.233204	1.5758e-16	2.94578	0.00383834	0.70691	-2.41168
HCN1	0.314764	-3.4023e-17	2.94015	0.00390417	0.70691	-2.42156
SPACA4	0.303819	-1.14604e-16	2.93638	0.00394876	0.70691	-2.42815
UBL5P3	0.321115	1.86231e-16	2.9324	0.00399647	0.70691	-2.43512
VN1R6P	0.319362	2.50696e-17	2.93213	0.00399965	0.70691	-2.43558
NKX2-1	0.349525	4.44089e-16	2.92629	0.00407053	0.70691	-2.44578
LPA	0.349137	-8.23714e-17	2.92577	0.00407695	0.70691	-2.44669
NYNRIN	0.35618	1.00278e-16	2.92457	0.00409167	0.70691	-2.44879
FRAT1	0.326443	-9.31155e-17	2.9239	0.00409999	0.70691	-2.44996
SPAM1	0.315299	1.0386e-16	2.92367	0.00410274	0.70691	-2.45035
BAIAP2	0.3575	1.0386e-16	2.90911	0.00428592	0.70691	-2.47569
NDUFB4P6	0.360198	1.68324e-16	2.90831	0.0042962	0.70691	-2.47708
SRPK3	0.271622	-1.89812e-16	2.90769	0.00430417	0.70691	-2.47816
STH	0.275136	-1.00278e-16	2.9052	0.00433638	0.70691	-2.48248
TMEM191A	0.332822	5.37205e-17	2.90183	0.00438025	0.70691	-2.48832
OTOP1	0.285573	-6.98366e-17	2.89939	0.00441234	0.70691	-2.49255
EVC2	0.379265	-1.39673e-16	2.89699	0.00444409	0.70691	-2.49671
ENO1-AS1	0.28501	-1.5758e-16	2.89531	0.0044664	0.70691	-2.49961
SPATA6L	0.244408	-5.01391e-17	2.89484	0.0044727	0.70691	-2.50043
RPAIN	0.366061	2.57858e-16	2.89256	0.00450321	0.70691	-2.50437
OR2AK2	0.32134	-2.50696e-17	2.88984	0.00453987	0.70691	-2.50907
CLCN7	0.357813	1.93394e-16	2.88925	0.00454788	0.70691	-2.51009
GPR162	0.355562	-1.43255e-16	2.88667	0.00458298	0.70691	-2.51454
DTX1	0.356247	1.00278e-16	2.88591	0.00459334	0.70691	-2.51585
CCR8	0.31386	1.43255e-16	2.88162	0.00465242	0.70691	-2.52326
C8orf86	0.32519	-1.53999e-16	2.87198	0.00478757	0.70691	-2.53985
SNAR-B2	0.629258	6.01669e-16	2.87124	0.004798	0.70691	-2.54111
ICOS	0.323475	-1.12813e-16	2.86853	0.00483675	0.70691	-2.54576
LHX1	0.271388	1.5758e-16	2.86746	0.00485213	0.70691	-2.5476
MTND4P11	0.337581	-4.29764e-17	2.8613	0.00494141	0.70691	-2.55816
FAM210CP	0.27549	2.18463e-16	2.86027	0.00495658	0.70691	-2.55993
RPS7P15	0.385103	-1.86231e-16	2.85625	0.00501577	0.70691	-2.5668
NRG1	0.334731	7.52087e-17	2.85392	0.00505048	0.70691	-2.5708
MTCO2P5	0.287319	-1.07441e-17	2.85216	0.0050768	0.70691	-2.5738
UTS2R	0.288446	7.879e-17	2.85183	0.00508172	0.70691	-2.57436
WIZ	0.245575	-7.16273e-17	2.84487	0.00518707	0.70691	-2.58624
NCBP1	0.26947	9.31155e-17	2.84385	0.00520274	0.70691	-2.58798
PRDX3P2	0.254771	-1.00278e-16	2.8432	0.00521273	0.70691	-2.58909
RPL7L1P12	0.295661	-2.14882e-16	2.84133	0.00524143	0.70691	-2.59227
GRM4	0.327121	-1.14604e-16	2.84105	0.00524575	0.70691	-2.59274
RPL14P5	0.325488	2.07719e-16	2.8405	0.00525428	0.70691	-2.59368
FAM187B2P	0.278443	-1.14604e-16	2.83957	0.00526873	0.70691	-2.59527
SNAR-G1	0.314357	3.00835e-16	2.83922	0.00527405	0.70691	-2.59586
KAAG1	0.332976	0	2.83842	0.00528653	0.70691	-2.59722
TBCB	0.251233	-9.31155e-17	2.83451	0.00534766	0.70691	-2.60387
GADL1	0.313644	1.11022e-16	2.82484	0.00550157	0.70691	-2.62028
SUMO1P1	0.296052	-2.82928e-16	2.82391	0.00551666	0.70691	-2.62186
TMEM242	0.36891	-2.04138e-16	2.82036	0.00557432	0.70691	-2.62787
GNA15	0.284092	-1.75487e-16	2.82012	0.00557832	0.70691	-2.62828
KCNK9	0.255975	-5.01391e-17	2.81903	0.00559604	0.70691	-2.63012
ACSM2B	0.299636	-1.36092e-16	2.81694	0.00563043	0.70691	-2.63366
CNTN4-AS2	0.335378	-9.66968e-17	2.81609	0.00564451	0.70691	-2.6351
IGFBP1	0.281807	1.14604e-16	2.80839	0.00577293	0.707256	-2.6481
RPL31P50	0.416979	-3.1516e-16	2.80755	0.00578713	0.707256	-2.64952
PRG3	0.32757	-1.39673e-16	2.80716	0.00579361	0.707256	-2.65016
PTPMT1	0.490345	8.23714e-17	2.8066	0.00580306	0.707256	-2.6511
C1QA	0.271146	-2.50696e-16	2.8017	0.0058866	0.711132	-2.65936
SPACA1	0.308946	-1.77278e-16	2.79501	0.00600252	0.718278	-2.67062
PKLR	0.259824	-4.15438e-16	2.79374	0.00602467	0.718278	-2.67274
SLC9A3R2	0.341961	-4.08276e-16	2.78864	0.00611462	0.721524	-2.6813
LRCOL1	0.39044	-6.80459e-17	2.78799	0.00612621	0.721524	-2.68239
SLC5A4	0.311278	3.4023e-17	2.78697	0.00614446	0.721524	-2.68411
RPSAP59	0.310588	-1.79068e-16	2.78614	0.00615927	0.721524	-2.6855
SH3GL1P1	0.25577	-1.21766e-16	2.78334	0.00620946	0.721524	-2.69018
OR56A5	0.384302	-1.0386e-16	2.77652	0.0063334	0.722892	-2.70158
TIMM10B	0.312321	1.61161e-16	2.77649	0.00633397	0.722892	-2.70163
COX4I1P2	0.357828	1.55789e-16	2.77073	0.00644043	0.726598	-2.71125
[truncated: 27,125 more rows]

## Sheet: SE
Gene	logFC	AveExpr	t	P.Value	adj.P.Val	B
[truncated: 27,302 more rows]

[truncated: 1 more sheets: TB]
