# Supplementary material for: Molecular portraits of colorectal cancer morphological regions
Source: eLife. 2023 Nov 13;12:RP86655. doi: 10.7554/eLife.86655 (PMC10642970; doi:10.7554/eLife.86655)
Supplement: Supplementary file 9. [file elife-86655-supp9.xlsx]

## Sheet: Content
Differential expression analysis for matched pairs (per patient) of morphotypes.
Only the cases with more than 5 pairs of matched samples were considered.
For each pair, the fold change is computed as <first morphotype> - <second morphotype>,
i.e. the second morphotype is taken as reference in LIMMA.
Comparison	No. of pairs
DE vs CT	6
SE vs DE	7
SE vs MU	8
MU vs CT	5
Groups:	(not all necessary present here)
	CT	complex tubular
	DE	desmoplastic
	MU	mucinous
	PP	papillary
	SE	serrated
	TB	solid/trabecular
	NR	tumor-adjacent normal
	ST	tumor-supportive stroma

## Sheet: DE vs CT
Gene	logFC	AveExpr	t	P.Value	adj.P.Val	B
LOX	1.49346	4.69349	7.14436	1.43974e-06	0.0393078	3.63231
FAM133CP	1.0758	4.68341	5.61155	2.86125e-05	0.151654	1.70757
SNORD113-4	1.11738	4.93216	5.53733	3.33281e-05	0.151654	1.6035
XGY2	2.49383	4.29907	5.3955	4.46923e-05	0.163864	1.40189
PRRX1	1.18252	5.18782	5.11748	7.9977e-05	0.185135	0.996464
COPZ2	0.962141	5.08146	5.11265	8.0796e-05	0.185135	0.989302
PLXDC2	1.24668	5.50926	5.09982	8.30125e-05	0.185135	0.970268
CLIC2	0.935304	3.86762	4.93363	0.000118058	0.214882	0.721212
FRMD6	0.870486	4.55656	4.85937	0.000138305	0.224251	0.608478
SLC2A3P2	0.820132	3.09782	4.769	0.000167798	0.254513	0.470143
COL6A3	0.92525	6.27746	4.70186	0.000193807	0.269899	0.36656
EDNRA	1.07684	6.10992	4.66759	0.000208633	0.269899	0.313425
GNAI2	0.91314	4.98442	4.49676	0.000301692	0.284027	0.0460957
RAB31	1.09918	5.2447	4.44307	0.000338924	0.308443	-0.0387417
SFRP2	1.88924	6.14238	4.38314	0.000386021	0.321354	-0.133869
TRAJ36	0.906816	7.28685	4.35331	0.000411893	0.33075	-0.181402
HTR2A	0.84382	4.0022	4.31523	0.00044748	0.339364	-0.242218
ASPN	1.19782	4.80173	4.24995	0.000515881	0.350367	-0.346864
IGHG4	1.09452	6.8559	4.20705	0.000566511	0.350367	-0.41591
BGN	0.956883	5.77432	4.20195	0.000572847	0.350367	-0.424122
CTHRC1	1.04736	5.68341	4.19981	0.00057553	0.350367	-0.427571
DMXL2	0.696203	5.6985	4.17275	0.000610574	0.350367	-0.471247
VCAN-AS1	0.814814	3.42807	4.15907	0.000629101	0.350367	-0.493353
OGFRL1	1.00254	6.32554	4.15003	0.000641651	0.350367	-0.507969
OLFML2B	0.862261	6.40622	4.13452	0.000663781	0.350456	-0.533072
TGFB3	1.45747	5.7056	4.12955	0.000671034	0.350456	-0.541121
FN1	0.897935	5.60841	4.10283	0.000711417	0.353147	-0.584432
FAM168A	0.667245	4.43044	4.07013	0.000764175	0.372562	-0.637518
GLT8D2	1.1119	4.49408	4.01126	0.000869317	0.393362	-0.733359
MEDAG	1.0259	4.70976	4.00543	0.000880492	0.393362	-0.742867
COL10A1	1.01891	5.0658	3.99986	0.000891306	0.393362	-0.751956
ABCC9	1.15416	3.92097	3.99824	0.000894482	0.393362	-0.754606
VN1R74P	0.692978	3.44473	3.99109	0.000908589	0.393362	-0.76626
ATRN	0.676006	4.44893	3.95231	0.000989193	0.393362	-0.829625
LAMA2	0.992329	4.6214	3.9509	0.000992266	0.393362	-0.831939
GBA	0.781671	5.27174	3.95004	0.00099414	0.393362	-0.833347
NR2F2	0.744329	6.3749	3.8901	0.00113377	0.43492	-0.931515
DCN	0.936656	7.51546	3.85422	0.00122658	0.43492	-0.990394
LOXL1	0.999487	6.27592	3.84326	0.00125644	0.43492	-1.0084
BICC1	0.807771	5.17725	3.83113	0.00129033	0.43492	-1.02834
PDGFRA	0.757242	6.57936	3.8151	0.00133652	0.439635	-1.05471
SRGAP2	0.686784	2.62472	3.76753	0.00148353	0.464042	-1.13302
LUM	1.17693	6.96992	3.76073	0.00150584	0.464042	-1.14423
OR2L9P	0.621501	2.53821	3.7537	0.00152925	0.464042	-1.15581
MFAP2	0.862889	5.47534	3.75357	0.0015297	0.464042	-1.15603
LXN	1.01525	3.59153	3.73949	0.00157768	0.470129	-1.17924
POSTN	0.979293	5.45002	3.73761	0.0015842	0.470129	-1.18234
SLCO2B1	0.834639	3.61909	3.69974	0.00172144	0.48488	-1.24483
FPR3	0.720712	5.5919	3.69706	0.00173159	0.48488	-1.24926
SNAI2	0.827251	4.94482	3.69484	0.00174002	0.48488	-1.25291
SCG5	0.816067	4.56368	3.68328	0.00178474	0.48488	-1.27201
GXYLT2	1.03472	4.47954	3.68032	0.00179634	0.48488	-1.27689
ITGBL1	0.658569	4.01575	3.67443	0.00181971	0.48488	-1.28663
CHTOP	0.631239	3.746	3.66934	0.00184015	0.48488	-1.29504
VSIG4	0.683338	3.57475	3.66485	0.00185835	0.48488	-1.30245
SNORA63	0.652273	4.63713	3.6584	0.00188484	0.485472	-1.31312
EMCN	0.689614	4.77339	3.65107	0.00191535	0.485732	-1.32522
IFI16	0.807585	8.16866	3.63266	0.0019943	0.486145	-1.35567
CYBRD1	1.11725	4.00332	3.62431	0.00203114	0.486585	-1.36947
LGALS1	0.679991	9.28566	3.62417	0.00203175	0.486585	-1.3697
APOD	1.14877	6.94867	3.61705	0.00206372	0.487403	-1.38148
ALOX5AP	0.641308	6.43097	3.58633	0.00220749	0.494008	-1.43231
SFRP4	1.1264	7.18301	3.57277	0.00227406	0.49648	-1.45474
TSPAN2	0.700287	3.8395	3.56596	0.00230824	0.49648	-1.46601
FRY	0.606558	2.31384	3.52688	0.00251456	0.51397	-1.53072
SRPX2	0.858428	4.20274	3.52595	0.0025197	0.51397	-1.53226
PCDH7	0.635486	4.35483	3.51752	0.00256663	0.51397	-1.54622
LAYN	0.625235	2.92241	3.51625	0.0025738	0.51397	-1.54833
PLPPR4	0.623362	3.43413	3.51328	0.00259056	0.51397	-1.55324
MMP14	0.665312	4.8199	3.50936	0.00261291	0.51397	-1.55974
IGKV1-33	0.967889	5.12643	3.49675	0.00268603	0.51397	-1.58062
GFPT2	0.673805	4.37829	3.49664	0.00268669	0.51397	-1.58081
PLS3	0.74304	6.37793	3.49632	0.00268856	0.51397	-1.58133
SFRP1	0.995447	3.30234	3.48162	0.00277649	0.522785	-1.60569
COMMD1	0.614188	4.50607	3.46813	0.00285963	0.525102	-1.62803
HSPA8P15	0.677377	3.61828	3.46708	0.00286621	0.525102	-1.62977
SRGAP2C	0.683371	5.27092	3.46514	0.00287841	0.525102	-1.63299
RRP7A	0.596808	3.83986	3.45805	0.00292343	0.525102	-1.64474
RUNX1	0.626263	7.77423	3.45442	0.00294671	0.525824	-1.65075
AASS	0.693033	4.24551	3.44907	0.0029814	0.52856	-1.65962
PDGFRL	0.60821	3.85626	3.44531	0.00300604	0.529489	-1.66585
HACD4	0.749439	4.29328	3.43503	0.00307435	0.5323	-1.68288
MS4A4E	0.603214	3.89907	3.41406	0.00321853	0.535695	-1.71762
SLC12A8	0.957186	4.63141	3.40054	0.00331505	0.535695	-1.74002
CCDC80	0.978029	4.92846	3.38899	0.00339973	0.535695	-1.75915
TRIM59	0.868978	2.80417	3.38467	0.00343195	0.535695	-1.76631
BASP1	0.560795	6.59566	3.3828	0.003446	0.535695	-1.76941
TDO2	0.562651	3.88402	3.37432	0.00351036	0.535695	-1.78344
NEK7	0.535459	3.96418	3.36589	0.0035756	0.535695	-1.79742
NRP2	0.743871	6.15787	3.36536	0.0035797	0.535695	-1.79829
BMPR1B	0.630212	3.47042	3.35932	0.00362722	0.535695	-1.8083
SNORD108	0.789367	2.74001	3.35422	0.00366777	0.535695	-1.81673
CLCP2	0.564852	4.07972	3.34945	0.00370615	0.535695	-1.82463
IKBKG	0.56954	4.14762	3.33005	0.00386634	0.535695	-1.85676
STMN1P1	0.588172	2.37045	3.32892	0.00387589	0.535695	-1.85864
FAM197Y6	0.600851	4.37277	3.32468	0.00391189	0.535695	-1.86565
THY1	0.743714	6.17309	3.32356	0.00392146	0.535695	-1.86751
GBP3	0.802486	6.02231	3.3219	0.00393565	0.535695	-1.87025
EMP3	0.719073	5.46116	3.31649	0.00398229	0.535695	-1.8792
PTPN14	0.604768	4.46	3.31406	0.00400348	0.535695	-1.88323
SERPINH1P1	0.659414	4.09136	3.31327	0.00401036	0.535695	-1.88454
DCLK2	0.713255	4.05548	3.31067	0.00403315	0.535695	-1.88884
FBXO25	0.550983	3.47348	3.30775	0.00405892	0.535695	-1.89368
RDX	0.817473	5.58484	3.3067	0.00406815	0.535695	-1.8954
SULF1	0.807624	8.60735	3.30466	0.00408631	0.535695	-1.89879
MFAP5	0.678862	3.35132	3.3046	0.00408684	0.535695	-1.89889
PRKD3	0.667431	2.70421	3.29865	0.00414017	0.535695	-1.90874
LY96	0.853525	5.07135	3.29849	0.00414164	0.535695	-1.909
ARSB	0.541231	4.4681	3.29808	0.00414527	0.535695	-1.90967
ARPP19	0.534544	4.02977	3.29632	0.00416121	0.535695	-1.91259
BNIP3P4	0.577149	6.0903	3.29143	0.00420582	0.535695	-1.92069
TIMP1	0.662973	8.59315	3.29014	0.00421759	0.535695	-1.92281
ANTXR1	0.679479	7.79816	3.28944	0.00422405	0.535695	-1.92398
FBLN5	0.780276	3.93128	3.28337	0.00428029	0.538527	-1.93403
INHBA	0.606178	7.97473	3.27206	0.00438689	0.539569	-1.95272
PIP5K1A	0.844305	3.85509	3.27171	0.00439031	0.539569	-1.95331
OMD	0.902469	2.5087	3.26932	0.00441315	0.539569	-1.95726
QPCT	0.979683	4.36644	3.26315	0.00447282	0.539569	-1.96747
CDK14	0.71805	3.64219	3.2596	0.00450744	0.539569	-1.97333
MTND2P16	0.599919	2.62658	3.25695	0.00453349	0.539569	-1.97771
MAP4K5	0.581146	2.98274	3.25225	0.00458015	0.539569	-1.98549
TRPC1	0.717815	2.92781	3.24997	0.0046029	0.539569	-1.98926
TCF4	0.698	6.7299	3.24494	0.00465354	0.539569	-1.99758
PLA2G4A	0.576215	3.12945	3.24195	0.00468382	0.539569	-2.00251
NPM1P9	0.561974	3.98347	3.23368	0.00476884	0.540306	-2.01619
GOLGA8N	0.689954	5.37766	3.22896	0.00481795	0.540306	-2.02398
ACTA2	0.785585	8.25962	3.22752	0.0048331	0.540306	-2.02637
COQ5	0.596872	5.47633	3.2194	0.00491908	0.540306	-2.03978
KLLN	0.669316	2.88514	3.21491	0.00496729	0.540306	-2.0472
MBNL1	0.756083	5.53729	3.21173	0.00500169	0.540857	-2.05245
IGLV1-41	0.587272	3.92487	3.20799	0.00504249	0.540857	-2.05863
MORF4L1P1	0.575353	6.16869	3.2039	0.0050875	0.540857	-2.06539
MSR1	0.654431	3.438	3.20273	0.00510039	0.540857	-2.06731
ID2	0.574359	4.09173	3.20177	0.00511102	0.540857	-2.0689
MYOF	0.614094	5.9079	3.19813	0.0051516	0.540875	-2.07491
PALMD	0.595117	5.31284	3.19483	0.00518864	0.540875	-2.08036
CFAP54	0.851892	2.94052	3.19211	0.00521934	0.540875	-2.08485
OPCML-IT1	0.506511	2.41823	3.19203	0.00522017	0.540875	-2.08497
LMO3	0.654368	4.18778	3.18478	0.00530298	0.546347	-2.09695
ETV1	0.515028	5.62102	3.17826	0.00537854	0.547929	-2.10771
FABP3	0.600322	5.24001	3.16054	0.00558906	0.563072	-2.13693
EMBP1	0.517536	5.04055	3.14758	0.00574824	0.568618	-2.15831
DNMT3A	0.630672	2.57327	3.13626	0.00589088	0.573368	-2.17697
COL3A1	0.767582	8.69675	3.13544	0.00590127	0.573368	-2.17831
CD74	0.62672	6.60663	3.12975	0.00597445	0.577019	-2.18769
GNAI2P1	0.631621	4.71154	3.12229	0.00607168	0.577598	-2.19998
NDUFB1P2	0.560278	3.66337	3.11747	0.00613521	0.577598	-2.20791
ST6GAL2	1.17247	5.11047	3.11258	0.00620041	0.578075	-2.21595
CYP1B1	0.747888	3.92456	3.11188	0.0062099	0.578075	-2.21712
TAMM41	0.532495	3.62197	3.11031	0.00623102	0.578075	-2.2197
MXRA5	0.752231	5.94993	3.09685	0.00641489	0.578223	-2.24185
SMAD7	0.592051	5.65625	3.09227	0.00647867	0.579936	-2.24938
CHST11	0.576305	6.24471	3.0862	0.00656414	0.580967	-2.25936
SLC2A14	0.647655	5.30634	3.08603	0.0065665	0.580967	-2.25964
BSNDP3	0.500976	5.16812	3.07404	0.00673867	0.585921	-2.27935
ZEB1	0.666406	6.01107	3.06866	0.00681739	0.588558	-2.28819
TRPM7	0.680611	2.72632	3.0655	0.00686399	0.588558	-2.29338
GTF2IP9	0.6168	2.9972	3.05926	0.00695704	0.588558	-2.30364
GPR34	0.735527	4.44137	3.05633	0.00700113	0.588558	-2.30845
SNORD114-21	0.717543	3.37062	3.04953	0.00710442	0.588558	-2.31961
EVI2A	0.627652	4.58625	3.04696	0.007144	0.588558	-2.32384
BNIP3L	0.516179	6.85742	3.04116	0.00723379	0.588558	-2.33335
PRDM6	0.49605	5.92143	3.04055	0.00724325	0.588558	-2.33435
EFEMP2	0.596452	5.27711	3.02799	0.00744186	0.592223	-2.35495
SAMD9	0.607125	4.34696	3.02697	0.00745818	0.592223	-2.35662
ABI3BP	0.965473	3.95173	3.02259	0.0075289	0.595126	-2.36381
MRPL55	0.497891	5.09003	3.02079	0.0075581	0.595126	-2.36676
TRAV32	0.589957	2.43858	3.009	0.00775215	0.597433	-2.38607
DSE	0.604433	4.87324	3.00849	0.0077607	0.597433	-2.38691
JAM2	0.663313	5.5773	3.00536	0.00781308	0.597433	-2.39203
SNORD114-5	0.514417	2.28941	2.99744	0.0079472	0.597433	-2.405
NISCH	0.739902	4.96023	2.99412	0.00800418	0.597433	-2.41044
ENTPD7	0.473758	4.34774	2.9863	0.00813975	0.597433	-2.42324
SDC1	0.506394	5.37081	2.983	0.00819752	0.597433	-2.42863
C3	0.853915	9.62933	2.98194	0.0082163	0.597433	-2.43037
ZC2HC1A	0.736805	3.63749	2.98007	0.00824932	0.597433	-2.43343
PIEZO2	0.821147	4.81802	2.97726	0.00829915	0.597433	-2.43801
ADAMTS4	0.477472	2.80082	2.96881	0.008451	0.597433	-2.45183
SPARC	0.777119	8.03297	2.96846	0.00845746	0.597433	-2.45241
PIAS1	0.56203	6.7012	2.96797	0.00846633	0.597433	-2.45321
COL1A2	0.714203	8.42411	2.96624	0.00849768	0.597433	-2.45602
ENTPD4	0.498419	4.58192	2.96468	0.00852629	0.597433	-2.45858
BHLHE41	0.789681	6.7075	2.96211	0.0085733	0.597433	-2.46277
EMC7	0.532744	5.59186	2.96114	0.00859112	0.597433	-2.46435
IGSF6	0.548133	4.34336	2.96076	0.00859819	0.597433	-2.46498
NAV1	0.528402	5.96227	2.96052	0.00860267	0.597433	-2.46538
ANGPT2	0.526932	3.81783	2.95911	0.00862874	0.597433	-2.46768
PSD3	0.690186	4.52658	2.95636	0.00867967	0.597433	-2.47217
TFEC	0.629491	4.72267	2.95249	0.00875189	0.597433	-2.47848
EFEMP1	1.26811	3.17474	2.94599	0.00887464	0.597433	-2.48909
ADGRL2	0.551584	3.63829	2.93901	0.0090084	0.597433	-2.50049
LIX1L	0.531326	4.5253	2.93637	0.00905934	0.597433	-2.50478
DCBLD2	0.67173	6.38664	2.93569	0.00907256	0.597433	-2.50589
CD53	0.567349	6.97962	2.93488	0.00908846	0.597433	-2.50723
AIRN	0.482315	3.64744	2.93384	0.00910852	0.597433	-2.50891
MPRIP	0.560186	5.3397	2.93381	0.00910914	0.597433	-2.50896
C9orf72	0.536092	2.54428	2.93375	0.00911037	0.597433	-2.50906
CRTC3	0.482076	4.66488	2.93129	0.0091585	0.597433	-2.51307
SNORD113-6	0.495691	3.40626	2.92822	0.00921889	0.597433	-2.51808
FAP	1.14496	5.86109	2.92587	0.00926524	0.597433	-2.5219
TTC39C-AS1	0.497265	4.10943	2.92547	0.00927323	0.597433	-2.52256
MEF2A	0.73215	4.91027	2.92209	0.00934054	0.597433	-2.52807
MB21D2	0.62975	3.54312	2.92117	0.00935897	0.597433	-2.52957
SGCB	0.59802	5.18581	2.91727	0.00943729	0.597433	-2.53592
FBN1	0.576031	6.67967	2.91693	0.00944411	0.597433	-2.53647
RB1CC1	0.494749	4.0692	2.91673	0.00944823	0.597433	-2.5368
POLK	0.60192	3.95184	2.91621	0.00945877	0.597433	-2.53765
ZMYND19P1	0.481385	3.41709	2.90897	0.00960628	0.597433	-2.54944
RNF180	0.523838	3.46905	2.90805	0.00962515	0.597433	-2.55093
GJB2	0.527315	6.17064	2.9062	0.00966326	0.597433	-2.55394
SHQ1	0.478028	3.78885	2.90236	0.00974291	0.597433	-2.5602
NFIA-AS1	0.484156	2.05537	2.90234	0.00974322	0.597433	-2.56022
HLA-DPA1	0.559626	3.98404	2.9011	0.0097691	0.597433	-2.56224
JKAMPP1	0.478324	2.13775	2.89933	0.00980601	0.597433	-2.56511
VCAN	0.725076	5.7405	2.89174	0.00996623	0.598018	-2.57746
BCRP6	0.469492	4.75787	2.88797	0.0100468	0.600216	-2.5836
SEC24A	0.655953	4.97575	2.8783	0.0102561	0.604435	-2.5993
TRAJ35	0.639435	8.66617	2.87645	0.0102967	0.604435	-2.60231
THRAP3P1	0.451884	2.94093	2.87554	0.0103167	0.604435	-2.60378
CPXM2	0.695457	4.27408	2.87293	0.0103743	0.604621	-2.60803
AGAP2	0.51085	4.9297	2.86519	0.0105469	0.609048	-2.62059
ZFAND6	0.527297	5.90748	2.86252	0.0106069	0.609048	-2.62491
GPX1	0.5033	6.45271	2.86248	0.0106077	0.609048	-2.62497
FABP5P15	0.560435	3.53123	2.85832	0.0107022	0.609048	-2.63173
WDR44	0.494347	5.84791	2.8582	0.010705	0.609048	-2.63192
RPL7P43	0.479867	3.22545	2.85764	0.0107177	0.609048	-2.63283
ADAMTS16	0.939392	4.80787	2.85515	0.0107747	0.609048	-2.63686
BCAR3	0.46667	3.79255	2.84963	0.0109021	0.613402	-2.64582
MGP	0.879234	3.65923	2.8483	0.0109328	0.613402	-2.64796
PRSS3P1	0.699988	4.78073	2.84793	0.0109416	0.613402	-2.64857
SLC23A2	0.4773	4.29388	2.83992	0.0111294	0.615197	-2.66153
NLRP11	0.512534	3.31675	2.83739	0.0111895	0.615197	-2.66563
CDC42SE2	0.487155	2.86297	2.83681	0.0112033	0.615197	-2.66657
SNORD113-1	0.724384	2.9011	2.83619	0.0112182	0.615197	-2.66758
CRMP1	0.662049	5.91454	2.83318	0.0112903	0.615197	-2.67246
IRAK3	0.620033	5.49926	2.83151	0.0113302	0.615197	-2.67515
ANO2	0.499968	3.50743	2.83096	0.0113437	0.615197	-2.67605
ALYREF	0.456559	2.51526	2.83056	0.0113531	0.615197	-2.67668
SLC11A1	0.51933	5.08105	2.82176	0.0115673	0.615197	-2.69092
ARL2BPP10	0.4773	2.68776	2.82073	0.0115928	0.615197	-2.6926
CYP7B1	0.723258	4.15702	2.82065	0.0115946	0.615197	-2.69271
CD58	0.554232	4.09446	2.81621	0.0117045	0.615197	-2.69989
WDR72	0.529706	4.64119	2.81581	0.0117145	0.615197	-2.70054
PLXND1	0.51737	5.04613	2.81044	0.0118488	0.615197	-2.70922
PCCA	0.493084	2.54473	2.80919	0.0118802	0.615197	-2.71123
SNORD112	0.527537	2.62573	2.80375	0.012018	0.615197	-2.72002
GNRHR	0.491754	2.16898	2.80203	0.0120619	0.615197	-2.72279
HMBS	0.534734	2.39988	2.7994	0.0121295	0.615197	-2.72705
SLIT3	0.899621	4.83563	2.79876	0.0121457	0.615197	-2.72806
SKIL	0.581345	5.49168	2.79803	0.0121648	0.615197	-2.72926
SLC16A6	0.489173	2.18363	2.79646	0.0122052	0.615197	-2.73178
PICALM	0.491328	7.48184	2.7959	0.0122198	0.615197	-2.73269
STARD8	0.50471	4.54945	2.79425	0.0122625	0.615197	-2.73535
PPP2R2C	0.506294	3.74565	2.792	0.012321	0.615197	-2.73897
OGN	1.1776	2.89932	2.79174	0.012328	0.615197	-2.7394
ANKRD12	0.503207	4.27979	2.79171	0.0123285	0.615197	-2.73944
SRGAP2B	0.485784	5.09504	2.79126	0.0123405	0.615197	-2.74017
RUNX1-IT1	0.551174	6.41928	2.78795	0.0124271	0.615197	-2.7455
UBE2E2	0.541339	4.69451	2.78762	0.012436	0.615197	-2.74604
IGLV1-40	0.544763	5.8159	2.77937	0.0126551	0.61667	-2.75933
ZNF559-ZNF177	0.495019	3.74137	2.7791	0.0126623	0.61667	-2.75976
ADCY1	0.565287	3.45512	2.77534	0.0127635	0.616911	-2.76582
CHST15	0.583466	6.02051	2.7735	0.0128133	0.618016	-2.76879
FGFR1	0.571614	5.50149	2.76145	0.013144	0.62349	-2.78818
ERRFI1	0.555619	5.91273	2.76109	0.013154	0.62349	-2.78876
TRIM60P17	0.516303	2.12017	2.75914	0.0132083	0.624047	-2.79189
SP110	0.59504	4.249	2.75778	0.0132462	0.624102	-2.79407
HDX	0.516744	3.7721	2.75735	0.0132583	0.624102	-2.79477
NOG	0.477734	4.21008	2.75604	0.013295	0.624752	-2.79687
SNORD114-25	0.988184	4.84094	2.75369	0.013361	0.626774	-2.80064
RGS10	0.640039	6.04938	2.74686	0.0135553	0.627265	-2.81162
HIVEP2	0.618306	2.33153	2.74472	0.0136164	0.629002	-2.81504
ADAM20P3	0.439573	4.07884	2.74376	0.0136442	0.629002	-2.81659
GLIS3	0.534525	5.13696	2.73423	0.0139213	0.633467	-2.83189
SIK1	0.611291	4.63834	2.72585	0.0141693	0.63718	-2.84532
MTCYBP7	0.441134	2.10208	2.72363	0.0142356	0.63718	-2.84887
TMEM154	0.562633	3.52065	2.72246	0.0142708	0.63718	-2.85074
AFG3L2	0.452456	4.40014	2.72205	0.014283	0.63718	-2.8514
MLLT10	0.533	4.4434	2.71732	0.0144261	0.639694	-2.85898
CAMSAP1	0.498531	3.85983	2.7121	0.0145855	0.64118	-2.86733
DNAJB5	0.489158	3.86092	2.70933	0.0146706	0.64118	-2.87176
DAB2	0.536441	6.56765	2.70864	0.0146922	0.64118	-2.87287
MEG3	0.48987	7.15425	2.70669	0.0147524	0.64118	-2.87598
C1orf162	0.672581	4.88328	2.70585	0.0147786	0.64118	-2.87733
SIGLEC29P	0.463401	4.41592	2.70234	0.0148881	0.64118	-2.88294
MFAP1	0.463397	4.41789	2.70147	0.0149151	0.64118	-2.88432
TTC28	0.519621	3.24492	2.69994	0.0149635	0.64118	-2.88678
DYNLT3P1	0.539358	4.3182	2.69904	0.0149916	0.64118	-2.88821
DSG4	0.452353	2.99419	2.69903	0.014992	0.64118	-2.88823
PLCG2	0.525341	2.77591	2.6973	0.0150465	0.64118	-2.89099
RHOQ	0.515477	5.52496	2.69531	0.0151095	0.64118	-2.89417
ARHGAP1	0.468309	5.79454	2.69386	0.0151556	0.64118	-2.89648
ACTG1P13	0.440147	1.66451	2.69367	0.0151618	0.64118	-2.89679
EGR1	0.454886	5.82845	2.68928	0.0153023	0.642881	-2.90381
NLGN4Y	0.479688	2.19704	2.68902	0.0153107	0.642881	-2.90422
MBD5	0.591681	5.30998	2.68888	0.015315	0.642881	-2.90444
HSPE1P18	0.49962	3.57603	2.68492	0.0154431	0.645298	-2.91077
OR8X1P	0.455066	2.60376	2.6831	0.0155019	0.646158	-2.91366
PRLR	0.440469	2.86723	2.67612	0.0157308	0.651719	-2.92479
MT1IP	0.439608	3.62113	2.67465	0.0157795	0.652744	-2.92714
BBS9	0.473022	3.02496	2.67124	0.0158925	0.652763	-2.93256
OR4K5	0.481555	2.14261	2.67102	0.0158998	0.652763	-2.93291
ZNF507	0.462085	2.76978	2.66544	0.0160868	0.653975	-2.9418
CLSTN1	0.468618	4.9149	2.66385	0.0161405	0.653975	-2.94433
LAPTM5	0.527753	5.19526	2.663	0.0161695	0.653975	-2.9457
DPT	0.707297	4.02385	2.6623	0.016193	0.653975	-2.9468
SNORD114-1	0.537744	3.95003	2.66029	0.0162614	0.65482	-2.95
SWAP70	0.511946	5.71642	2.65872	0.0163151	0.656015	-2.9525
PLSCR4	0.55329	5.24353	2.65693	0.0163764	0.656547	-2.95535
KRT8P35	0.457345	3.72993	2.65524	0.0164342	0.657209	-2.95803
RPL7L1P9	0.497795	4.16988	2.65365	0.0164892	0.657209	-2.96057
ST7-AS2	0.506866	2.36937	2.65218	0.01654	0.658271	-2.9629
CCDC114	0.492471	4.46295	2.65098	0.0165815	0.658783	-2.96481
CEP128	0.531452	2.63559	2.64307	0.0168581	0.664156	-2.97737
SLAMF1	0.444181	2.66083	2.63848	0.0170207	0.666712	-2.98466
S1PR2	0.434933	6.07159	2.6316	0.0172673	0.668761	-2.99558
IGFL1P1	0.451714	3.99385	2.62973	0.0173346	0.668761	-2.99853
B3GALNT1	0.439798	2.93772	2.62799	0.0173977	0.668761	-3.00129
GPATCH2L	0.542523	3.73925	2.62754	0.0174141	0.668761	-3.00201
CD28	0.516665	3.37506	2.62738	0.01742	0.668761	-3.00227
SGIP1	0.583865	5.83737	2.62651	0.0174517	0.668761	-3.00365
CLIC3	0.480615	3.57836	2.62553	0.0174873	0.668761	-3.0052
C1QB	0.504473	5.26405	2.62183	0.0176228	0.668761	-3.01105
RGS9	0.439523	3.62972	2.61926	0.0177176	0.668761	-3.01513
MME	0.57413	2.90435	2.6176	0.017779	0.668761	-3.01775
FGF7P2	0.416542	5.71031	2.617	0.0178012	0.668761	-3.0187
PTPRC	0.59117	7.12305	2.61681	0.0178084	0.668761	-3.01901
CSRP2	0.467412	4.23874	2.61217	0.0179817	0.668761	-3.02636
IGKV1-5	0.515608	4.00044	2.61211	0.0179839	0.668761	-3.02645
COL6A1	0.661523	6.2096	2.61139	0.0180109	0.668761	-3.02759
STOM	0.464159	5.42711	2.61082	0.018032	0.668761	-3.02848
VGLL3	0.569523	5.29705	2.61061	0.0180401	0.668761	-3.02882
UCP3	0.414253	4.94919	2.60569	0.0182261	0.668761	-3.0366
WNK1	0.591201	4.09257	2.60416	0.0182842	0.668761	-3.03902
SFMBT2	0.447267	4.00094	2.60229	0.0183556	0.668761	-3.04197
SNORD116-1	0.41108	2.05452	2.6006	0.0184202	0.668761	-3.04464
KCNE4	0.602656	3.68584	2.60034	0.0184301	0.668761	-3.04505
IGHG3	0.600031	8.30107	2.60025	0.0184335	0.668761	-3.04518
CLK1	0.629945	2.54105	2.5979	0.018524	0.668761	-3.0489
DPYSL4	0.501301	3.40211	2.59604	0.018596	0.668761	-3.05185
CLEC18A	0.423206	4.54677	2.59584	0.0186037	0.668761	-3.05216
LRRK2	0.472738	3.90828	2.59546	0.0186183	0.668761	-3.05275
PIP4K2A	0.474445	5.33046	2.59396	0.0186767	0.668761	-3.05513
EPHB1	0.473556	4.27629	2.59366	0.0186882	0.668761	-3.0556
SS18L2P1	0.449349	4.63967	2.59303	0.0187126	0.668761	-3.05658
JUND	0.452521	3.27826	2.59265	0.0187275	0.668761	-3.05719
BNIP3P7	0.577241	6.20181	2.59113	0.0187867	0.668761	-3.05958
C1S	0.566932	7.00092	2.59086	0.0187972	0.668761	-3.06001
TCHP	0.575423	2.53062	2.5891	0.0188664	0.668761	-3.06279
PLPP1	0.480019	4.22619	2.58907	0.0188676	0.668761	-3.06285
HIF1A	0.604651	6.03355	2.5872	0.0189409	0.668761	-3.06578
HECW1	0.425127	3.5793	2.58644	0.018971	0.668761	-3.06699
SNORD114-20	0.602603	2.76991	2.58517	0.0190212	0.668761	-3.06899
GULP1	0.738018	5.31631	2.58263	0.0191216	0.668761	-3.07299
HOXC9	0.53582	4.49385	2.58093	0.0191895	0.668761	-3.07567
TMEM130	0.515147	3.44148	2.57794	0.0193092	0.668761	-3.08039
TAGLN	0.587895	7.18777	2.57546	0.0194086	0.668761	-3.08428
MTND3P12	1.14753	3.25698	2.57474	0.0194377	0.668761	-3.08542
DZIP1	0.48816	3.8467	2.57473	0.0194384	0.668761	-3.08545
IGFL2	0.450761	3.87531	2.57469	0.0194397	0.668761	-3.0855
PHLDB2	0.686144	3.51774	2.57301	0.0195076	0.668761	-3.08814
DENND4B	0.464858	5.20468	2.57059	0.0196059	0.668761	-3.09195
PIK3R5	0.47964	5.28568	2.57023	0.0196208	0.668761	-3.09253
FTH1P12	0.44849	6.06581	2.56735	0.0197382	0.668761	-3.09705
ZNF271P	0.517075	3.02403	2.56653	0.0197719	0.668761	-3.09834
NHSL2	0.572909	3.77228	2.56411	0.0198714	0.668761	-3.10215
FRY-AS1	0.446094	2.37007	2.56385	0.0198823	0.668761	-3.10256
FAM197Y3	0.462086	4.26535	2.56189	0.0199629	0.668761	-3.10563
FAM197Y2	0.462086	4.26535	2.56189	0.0199629	0.668761	-3.10563
BNC2	0.817904	5.01658	2.56188	0.0199634	0.668761	-3.10565
LDB2	0.442397	3.49344	2.55944	0.0200649	0.670515	-3.10949
FAM78B	0.453632	3.75445	2.55668	0.0201801	0.67354	-3.11383
IFNG-AS1	0.447155	3.31738	2.5541	0.0202881	0.674671	-3.11788
C1R	0.521656	4.04477	2.55074	0.0204297	0.675527	-3.12315
CDR1	0.848987	4.65369	2.55056	0.0204375	0.675527	-3.12344
NOX4	0.645631	3.28255	2.54812	0.0205411	0.67752	-3.12727
UBBP3	0.490909	3.0148	2.54777	0.0205558	0.67752	-3.12781
RPL3P12	0.431363	4.94952	2.54674	0.0205998	0.677608	-3.12943
TSHZ2	0.534225	4.1947	2.54405	0.0207149	0.679176	-3.13365
LAMB1	0.538188	4.63334	2.54239	0.0207859	0.679176	-3.13624
SLC43A3	0.597994	4.77969	2.54001	0.0208887	0.680008	-3.13998
SMAD2	0.473955	4.99323	2.53973	0.0209006	0.680008	-3.14041
ACTBP7	0.413296	4.7271	2.53861	0.0209492	0.680008	-3.14217
IGHV4-28	0.527135	5.34564	2.53695	0.0210214	0.680008	-3.14478
GNAI2P2	0.482531	2.59104	2.53359	0.0211677	0.681023	-3.15003
RPL15P4	0.455443	3.137	2.52859	0.0213876	0.681512	-3.15786
GPR183	0.610723	4.9004	2.52715	0.0214515	0.681512	-3.16012
CLU	0.671685	4.29878	2.52646	0.0214818	0.681512	-3.16119
ZNF969P	0.428222	3.41553	2.52509	0.0215429	0.682325	-3.16334
TPRG1	0.455303	2.87677	2.52446	0.0215711	0.682428	-3.16433
KLHL2	0.411711	3.34023	2.51981	0.0217792	0.687087	-3.17159
AMD1P1	0.433061	3.24596	2.51948	0.0217939	0.687087	-3.17211
ACVR1	0.430831	6.20001	2.51467	0.0220113	0.689997	-3.17962
LEF1-AS1	0.412218	3.89038	2.51242	0.0221137	0.689997	-3.18313
FTLP2	0.572712	7.09932	2.50835	0.0223002	0.69332	-3.18949
EWSAT1	0.427218	4.31194	2.50682	0.0223706	0.694048	-3.19187
PTPRM	0.843328	5.36142	2.50543	0.0224345	0.694211	-3.19403
SCAF11	0.491843	3.65824	2.50494	0.0224575	0.694211	-3.19481
MSC-AS1	0.503791	3.42468	2.5045	0.0224776	0.694211	-3.19548
LPAR6	0.496147	4.83304	2.49911	0.0227288	0.697239	-3.2039
MID2	0.504999	2.75378	2.49654	0.0228492	0.697794	-3.20789
PNRC1	0.464832	7.02193	2.49544	0.0229009	0.698594	-3.2096
SLX4IP	0.548713	5.11749	2.49443	0.0229487	0.699271	-3.21118
PPEF2	0.501429	2.40924	2.49341	0.0229971	0.699412	-3.21277
HLA-DOA	0.435691	4.09767	2.49076	0.0231228	0.700589	-3.2169
IGKV1D-22	0.413036	5.95671	2.48984	0.0231667	0.700589	-3.21833
NUP58P1	0.413151	2.45591	2.48864	0.0232238	0.700589	-3.22019
HLA-DRA	0.599022	5.19065	2.4885	0.0232305	0.700589	-3.22041
MDM4	0.43971	4.67334	2.48804	0.0232522	0.700589	-3.22112
QKI	0.445169	5.64377	2.48601	0.0233498	0.700589	-3.22428
NSL1	0.460254	4.46998	2.4831	0.0234899	0.701266	-3.22881
IL6RP1	0.410969	4.70388	2.48231	0.0235279	0.701266	-3.23003
ZNF239	0.445705	2.6806	2.47867	0.0237048	0.705677	-3.23569
SPACA1	0.430864	2.46603	2.47299	0.0239825	0.705989	-3.2445
EBF2	0.455057	3.43528	2.47243	0.0240104	0.705989	-3.24538
STXBP5	0.406369	5.426	2.4723	0.0240167	0.705989	-3.24558
BLID	0.448046	4.4476	2.47139	0.0240617	0.705989	-3.24699
COPA	0.561245	2.66461	2.47072	0.0240946	0.705989	-3.24802
CCNDBP1	0.552041	5.24379	2.46852	0.0242039	0.705989	-3.25144
RPS6KB2	0.424397	4.30227	2.46769	0.0242453	0.705989	-3.25274
MTCO1P11	0.484597	4.73173	2.46748	0.0242555	0.705989	-3.25305
SHOX2	0.466897	2.88133	2.46685	0.0242866	0.705989	-3.25402
SCARA3	0.425258	2.41671	2.46645	0.024307	0.705989	-3.25466
GSPT2	0.498647	3.62814	2.46462	0.024398	0.706381	-3.25748
SNORD116-19	0.53827	5.73244	2.46342	0.0244584	0.706977	-3.25935
PPP1R12BP2	0.442431	3.58129	2.46318	0.0244705	0.706977	-3.25972
ZNF818P	0.540063	4.60966	2.46035	0.0246127	0.709328	-3.2641
ZNF532	0.545032	4.6764	2.45849	0.0247067	0.709328	-3.26698
ANKRD6	0.441745	5.14668	2.45847	0.0247077	0.709328	-3.26701
PTTG4P	0.412895	3.20512	2.45699	0.0247827	0.709998	-3.2693
CTSK	0.631047	7.59681	2.45612	0.024827	0.709998	-3.27065
SNX19P2	0.417618	2.49068	2.44789	0.0252493	0.712552	-3.28339
ISM1	0.483502	3.82368	2.44698	0.0252961	0.712552	-3.28479
MAN1C1	0.464262	4.29093	2.44564	0.0253659	0.712552	-3.28687
ITGA11	0.399087	3.10072	2.44488	0.0254053	0.712552	-3.28805
RPL31P13	0.445373	3.9448	2.44264	0.0255218	0.712552	-3.2915
CUBNP2	0.412342	2.14306	2.4422	0.0255449	0.712552	-3.29218
SEMA3C	0.630345	6.12074	2.44173	0.0255694	0.712552	-3.29291
LAPTM4A	0.488656	8.59566	2.44045	0.0256364	0.712552	-3.29488
MS4A6E	0.413261	2.72624	2.44	0.0256598	0.712552	-3.29557
SNORD93	0.6655	7.35322	2.43862	0.0257327	0.712552	-3.29771
PTPN13	0.496658	3.15711	2.4384	0.0257443	0.712552	-3.29805
GPX8	0.5767	5.51059	2.438	0.0257652	0.712552	-3.29867
DOCK8	0.470649	4.35349	2.43506	0.0259205	0.712552	-3.3032
MROH2A	0.415234	3.08577	2.4341	0.0259711	0.712552	-3.30468
FKBP7	0.473163	4.11363	2.4331	0.0260245	0.712552	-3.30623
FHOD3	0.478301	3.22582	2.43186	0.0260903	0.712552	-3.30813
BTD	0.449008	4.04122	2.43159	0.0261048	0.712552	-3.30855
AKAP12	0.755074	5.91959	2.43047	0.0261649	0.712552	-3.31029
NBEAP1	0.416706	3.11308	2.42952	0.0262155	0.712552	-3.31174
OR4K14	0.422695	2.91187	2.42897	0.0262449	0.712552	-3.31259
TRAPPC8	0.391566	2.75887	2.42734	0.0263323	0.712552	-3.3151
DOCK5	0.441958	6.59753	2.42601	0.0264042	0.712552	-3.31716
NR2F1-AS1	0.506255	3.12199	2.42556	0.0264284	0.712552	-3.31785
TTC14	0.454513	4.59166	2.4208	0.0266863	0.712552	-3.32518
PHF21A	0.477429	4.82225	2.41935	0.0267654	0.712552	-3.32741
GABARAPL1	0.476789	6.11497	2.41921	0.0267728	0.712552	-3.32762
SERPINF1	0.743468	5.98959	2.41678	0.0269057	0.712552	-3.33135
PKHD1	0.377889	2.69617	2.41594	0.0269519	0.712552	-3.33265
TRAJ9	0.463131	2.67371	2.41549	0.0269767	0.712552	-3.33334
CST9	0.377229	3.26893	2.41546	0.0269787	0.712552	-3.3334
CPQ	0.467963	5.28008	2.41428	0.0270436	0.712552	-3.33521
PGAM5P1	0.448695	2.48751	2.41331	0.0270969	0.712552	-3.33669
PHC2	0.470766	5.45137	2.41301	0.0271135	0.712552	-3.33716
EIF1P3	0.417207	4.37091	2.41264	0.0271342	0.712552	-3.33773
HYI	0.391582	4.59759	2.40929	0.0273199	0.71487	-3.34288
ZNF852	0.405291	2.65629	2.40835	0.0273724	0.71487	-3.34433
VPS13C	0.447547	5.32755	2.40645	0.0274784	0.714874	-3.34724
YME1L1P1	0.419414	2.19228	2.40619	0.0274931	0.714874	-3.34764
NRP1	0.494749	3.93413	2.40403	0.027614	0.714997	-3.35095
OSBPL8	0.592701	5.84214	2.40121	0.0277728	0.714997	-3.35528
ZBED5-AS1	0.552097	3.91983	2.40121	0.0277731	0.714997	-3.35528
SAPCD1-AS1	0.399217	5.73775	2.4005	0.0278134	0.714997	-3.35638
NOP14-AS1	0.407789	5.03916	2.40036	0.027821	0.714997	-3.35658
ARHGDIB	0.402651	4.75847	2.39852	0.0279254	0.715104	-3.3594
AKAP13	0.48288	7.10804	2.39851	0.0279261	0.715104	-3.35942
WASH7P	0.398298	6.04531	2.39814	0.0279473	0.715104	-3.36
SPARCL1	0.791952	7.524	2.39385	0.0281917	0.717993	-3.36656
ERICD	0.445606	3.66845	2.39266	0.0282604	0.718591	-3.36839
PDLIM5	0.459364	7.20457	2.39183	0.028308	0.718591	-3.36966
SCIMP	0.46021	3.87217	2.39112	0.0283489	0.718591	-3.37075
VCAM1	0.389958	3.75582	2.3901	0.0284078	0.718591	-3.37231
PLXNA1	0.427019	4.12869	2.38753	0.0285562	0.718591	-3.37624
NUDT9P1	0.399205	3.32177	2.38661	0.0286096	0.718591	-3.37765
ZCCHC24	0.400142	4.375	2.38571	0.0286622	0.718591	-3.37903
CXXC1	0.389812	5.20509	2.38425	0.0287471	0.718591	-3.38126
EXOC2	0.466349	4.14279	2.38414	0.0287538	0.718591	-3.38144
RPL17P49	0.389822	3.15322	2.38302	0.0288189	0.718591	-3.38314
AFF2-IT1	0.545003	2.73789	2.38295	0.0288234	0.718591	-3.38326
COL11A1	0.506786	5.91112	2.38174	0.0288939	0.718591	-3.3851
SAR1A	0.409745	6.27362	2.3786	0.0290787	0.718591	-3.3899
IGKV2-28	0.886127	5.84163	2.37832	0.0290953	0.718591	-3.39033
ANOS1	0.542413	5.55525	2.37809	0.0291087	0.718591	-3.39068
EPYC	0.854362	3.82181	2.37708	0.0291684	0.718591	-3.39222
SLC35A2	0.419965	4.75702	2.37667	0.0291929	0.718591	-3.39285
DYM	0.513082	4.73124	2.37515	0.0292829	0.718959	-3.39517
PPP6C	0.44276	4.54038	2.3732	0.0293988	0.719621	-3.39815
TMEM45A	0.594767	2.75168	2.37202	0.0294694	0.719621	-3.39995
NUP210P3	0.395644	3.74032	2.37198	0.0294718	0.719621	-3.40001
IL20RB	0.4011	4.51722	2.37085	0.0295398	0.719621	-3.40175
GOLGA8Q	0.479452	4.40127	2.37064	0.0295518	0.719621	-3.40205
SEC24D	0.609828	7.23108	2.36785	0.0297197	0.719621	-3.40632
SLC12A5	0.447166	4.02664	2.3673	0.0297526	0.719621	-3.40715
SIX3-AS1	0.388612	3.54204	2.36728	0.0297539	0.719621	-3.40718
IGFBP3	0.450631	7.15541	2.36235	0.0300527	0.719621	-3.41471
NEFM	0.379272	2.31732	2.36137	0.0301122	0.719621	-3.41619
BCAT1	0.496994	3.69049	2.36119	0.0301232	0.719621	-3.41647
CBR3	0.439952	2.95066	2.36104	0.0301326	0.719621	-3.4167
NREP	0.470512	7.07368	2.36049	0.030166	0.719621	-3.41754
APBB2	0.517392	3.4762	2.35985	0.0302052	0.719621	-3.41852
CAB39P1	0.466285	2.33779	2.35899	0.0302576	0.719621	-3.41982
CACNG7	0.520081	3.49201	2.35769	0.0303374	0.719621	-3.4218
OSTM1	0.452481	3.31122	2.3566	0.0304042	0.719621	-3.42346
RPL32P33	0.428977	4.04972	2.35597	0.030443	0.719621	-3.42442
HEMGN	0.421527	1.80479	2.35264	0.0306486	0.719621	-3.42948
HCG26	0.479956	3.71232	2.35217	0.0306779	0.719621	-3.4302
ICE2P1	0.48373	2.4529	2.35148	0.0307205	0.719621	-3.43124
MT2A	0.554547	9.06193	2.35127	0.0307337	0.719621	-3.43157
IGHV1-45	0.479027	4.03684	2.35113	0.0307427	0.719621	-3.43179
GPM6B	0.452734	4.42363	2.35034	0.0307917	0.719621	-3.43298
SNORD67	0.482833	3.57427	2.34999	0.0308134	0.719621	-3.43351
MTND2P19	0.401723	1.98899	2.34486	0.0311348	0.720374	-3.44132
RWDD2B	0.50638	2.80396	2.34265	0.0312739	0.721757	-3.44467
C3AR1	0.454263	5.04419	2.34208	0.0313099	0.721769	-3.44554
RGS1	0.571315	4.78446	2.34084	0.0313881	0.721769	-3.44741
NBAT1	0.457273	4.46835	2.34082	0.0313894	0.721769	-3.44744
DHX30	0.431893	4.60082	2.33986	0.0314503	0.721769	-3.4489
SRF	0.418651	4.04906	2.33972	0.0314594	0.721769	-3.44912
ITGB1P1	0.48172	6.88818	2.33873	0.0315224	0.722234	-3.45062
ARL4C	0.445586	6.49308	2.33805	0.0315657	0.722234	-3.45166
ATG7	0.566634	8.44853	2.33541	0.0317339	0.723475	-3.45565
ANGPTL1	0.399269	2.44599	2.3345	0.0317925	0.723475	-3.45704
SNORD114-30	0.585979	2.87735	2.33359	0.0318509	0.723475	-3.45842
ZBTB8B	0.385295	2.99241	2.32877	0.0321621	0.723475	-3.46572
CD248	0.550985	5.46111	2.32639	0.0323167	0.723475	-3.46933
LRTM1	0.428696	2.27784	2.3242	0.0324594	0.723475	-3.47264
C3orf18	0.460583	4.48852	2.32384	0.0324832	0.723475	-3.47319
SLC6A10P	0.416374	5.60757	2.32355	0.0325021	0.723475	-3.47363
RAB30	0.510587	2.50821	2.32134	0.0326467	0.723475	-3.47696
LHPP	0.454918	3.85813	2.32119	0.0326566	0.723475	-3.47719
FSTL1	0.461251	4.95968	2.32089	0.0326764	0.723475	-3.47764
GLT8D1	0.55009	6.85992	2.31996	0.0327376	0.723475	-3.47905
TRBV11-2	0.391126	3.52037	2.3177	0.0328868	0.723475	-3.48247
GDA	0.404765	3.69845	2.31673	0.0329513	0.723475	-3.48394
MPPE1P1	0.387967	2.96662	2.31666	0.0329556	0.723475	-3.48404
CD163	0.610216	7.74272	2.31661	0.0329595	0.723475	-3.48412
IRF2BPL	0.575921	6.88287	2.31659	0.0329608	0.723475	-3.48415
NEK10	0.386081	2.35774	2.31635	0.0329765	0.723475	-3.48451
GLIPR1	0.469324	4.74128	2.31438	0.0331071	0.723475	-3.48748
B3GALT2	0.443238	2.96215	2.31328	0.0331808	0.723475	-3.48915
IGKV3-11	0.774437	4.90008	2.31307	0.0331945	0.723475	-3.48946
MEIS2	0.541311	5.45001	2.31152	0.0332983	0.723475	-3.4918
ATP2B4	0.531677	6.10215	2.31084	0.033344	0.723475	-3.49284
PAIP1	0.427008	3.2504	2.30919	0.0334549	0.723475	-3.49533
USP32	0.417049	3.1708	2.30874	0.0334849	0.723475	-3.496
HK3	0.369063	5.52062	2.30861	0.033494	0.723475	-3.4962
PGAM1P2	0.384429	4.61513	2.30785	0.0335446	0.723475	-3.49734
IL21-AS1	0.402703	2.20397	2.30691	0.0336083	0.723475	-3.49876
TP53BP2	0.366754	4.80088	2.30466	0.033761	0.723502	-3.50216
FMNL2	0.476196	3.77545	2.30378	0.0338203	0.724112	-3.50348
ANGPTL2	0.475144	5.57814	2.30231	0.0339202	0.724112	-3.5057
EPS8L1	0.383616	2.85709	2.30171	0.0339609	0.724376	-3.5066
ZNF626	0.432217	5.76588	2.30001	0.0340775	0.725727	-3.50917
IGFBP5	0.442893	6.87593	2.29957	0.0341073	0.725797	-3.50982
IGKV1-22	0.398235	5.79738	2.29734	0.0342606	0.728003	-3.51319
CPNE8	0.465904	5.09497	2.29728	0.0342643	0.728003	-3.51327
COMMD3-BMI1	0.426502	2.09881	2.29352	0.0345242	0.729118	-3.51894
CXCR4	0.447378	5.89533	2.29038	0.0347418	0.729221	-3.52365
TRO	0.385483	4.25697	2.28967	0.0347919	0.729221	-3.52473
SUCNR1	0.375951	2.83327	2.28932	0.0348157	0.729221	-3.52525
GTF2H3	0.392469	2.74185	2.28879	0.0348528	0.729221	-3.52604
SHPRH	0.437555	5.0404	2.28875	0.034856	0.729221	-3.52611
CHD1	0.382239	5.17733	2.28749	0.0349438	0.729508	-3.528
CT45A6	0.483535	2.02638	2.28604	0.0350453	0.730251	-3.53018
ADGRG2	0.412981	2.56071	2.2855	0.0350834	0.730251	-3.53099
ARHGAP28	0.411106	2.54642	2.2849	0.0351255	0.730251	-3.53189
AK6P2	0.485475	3.06768	2.28293	0.0352647	0.730986	-3.53486
SNORD123	0.383388	5.29094	2.28222	0.035315	0.730986	-3.53593
ZNF287	0.408752	2.63397	2.27903	0.0355407	0.732878	-3.5407
SLC4A11	0.547788	4.45271	2.27736	0.0356597	0.733091	-3.54321
SH3D21	0.48757	5.77016	2.27602	0.0357555	0.733091	-3.54522
KCNN4	0.416408	4.75238	2.27599	0.0357574	0.733091	-3.54526
CLEC2B	0.511389	4.56202	2.27579	0.0357724	0.733091	-3.54557
MAP6D1	0.372395	4.55968	2.27511	0.0358207	0.733091	-3.54658
SFI1	0.402187	3.74524	2.27457	0.0358597	0.733091	-3.5474
ADAR	0.44981	3.60437	2.27438	0.0358732	0.733091	-3.54768
ITGB1	0.485907	9.36144	2.27134	0.0360921	0.735363	-3.55224
NDUFB4P3	0.424028	4.67495	2.26989	0.0361965	0.736392	-3.5544
SVIL-AS1	0.486349	6.44834	2.26753	0.0363679	0.738228	-3.55794
LRRC28	0.753377	3.19721	2.26695	0.0364095	0.738524	-3.5588
AKR1B1	0.437451	3.92882	2.26483	0.0365645	0.741116	-3.56198
MTCYBP12	0.389588	1.74828	2.26343	0.0366666	0.742084	-3.56407
TMEM256P1	0.39933	2.85647	2.26287	0.0367074	0.74236	-3.5649
LMO4	0.492182	3.72906	2.26166	0.0367965	0.74306	-3.56672
COL24A1	0.559245	4.35417	2.26129	0.0368239	0.743064	-3.56728
MAOB	0.426904	4.33346	2.25713	0.0371306	0.7454	-3.57349
GOLGA8M	0.436561	3.77594	2.25439	0.0373345	0.747247	-3.57759
CDON	0.446855	2.40035	2.25405	0.0373592	0.747247	-3.57808
SIGLEC28P	0.421246	3.80915	2.254	0.037363	0.747247	-3.57816
DUXA	0.368483	2.18616	2.25193	0.0375175	0.747247	-3.58125
GLULP3	0.432244	4.5283	2.25114	0.0375765	0.747247	-3.58242
FCF1P3	0.389844	2.30171	2.25068	0.0376113	0.747247	-3.58312
CDKN2B-AS1	0.379552	3.35998	2.25054	0.0376214	0.747247	-3.58332
NEURL3	0.389415	3.53277	2.25008	0.0376561	0.747247	-3.58401
MMP9	0.460433	4.68398	2.24977	0.0376795	0.747247	-3.58447
IGKV3-15	0.586098	5.28558	2.24922	0.0377209	0.747247	-3.58529
RFPL3S	0.403086	4.67439	2.24884	0.0377498	0.747247	-3.58587
CD68	0.391664	5.93618	2.24879	0.0377534	0.747247	-3.58594
RPSAP17	0.427263	3.60256	2.24775	0.0378318	0.747383	-3.58749
H19	0.476106	6.37604	2.24444	0.0380817	0.750149	-3.59242
PXDC1	0.505407	4.31852	2.2431	0.0381836	0.751073	-3.59442
FMO2	0.511531	3.06017	2.23687	0.0386598	0.757167	-3.60369
UCP2	0.44569	4.52762	2.23382	0.0388951	0.75842	-3.60823
ST18	0.354379	1.76586	2.23339	0.0389284	0.75842	-3.60887
ZFHX4	0.441768	3.1785	2.23246	0.0390005	0.75842	-3.61025
LHX5-AS1	0.416085	4.12198	2.23245	0.0390011	0.75842	-3.61026
RPS4XP15	0.385395	2.04414	2.23086	0.0391242	0.758669	-3.61262
PLTP	0.43235	5.47848	2.23023	0.0391735	0.758669	-3.61356
NOP10	0.494596	6.59752	2.23	0.0391912	0.758669	-3.6139
SUMO2P8	0.416875	5.06703	2.2296	0.0392226	0.758669	-3.6145
DNAH17-AS1	0.412636	3.25521	2.22794	0.0393517	0.758669	-3.61695
COX6CP16	0.355398	2.18715	2.22774	0.0393674	0.758669	-3.61725
EIF4A2P2	0.439462	4.40815	2.22688	0.0394347	0.758669	-3.61853
RBBP4P5	0.401109	3.97566	2.22422	0.0396441	0.758669	-3.62248
FAM20A	0.459534	3.65464	2.22418	0.0396469	0.758669	-3.62254
SLC9A9	0.403621	2.87035	2.22182	0.0398326	0.758669	-3.62603
EPM2AIP1	0.386863	2.61926	2.22112	0.0398883	0.758669	-3.62707
NTM	0.385995	2.70078	2.22092	0.0399039	0.758669	-3.62737
USP50	0.511316	2.84278	2.22063	0.0399272	0.758669	-3.6278
NLRP1	0.376641	3.66144	2.21935	0.0400291	0.759075	-3.62971
GAB3	0.497775	4.84681	2.21926	0.0400362	0.759075	-3.62984
KRT17P7	0.472517	4.13487	2.21777	0.0401541	0.759728	-3.63204
SSXP5	0.38182	3.59877	2.21651	0.0402551	0.760615	-3.63391
SNORA54	0.407435	4.58302	2.21649	0.0402567	0.760615	-3.63394
F9	0.392159	2.74793	2.21497	0.040378	0.762028	-3.63619
KLF7	0.446018	6.40663	2.21039	0.0407462	0.762028	-3.64297
SLC5A4P1	0.36875	1.9966	2.20997	0.0407797	0.762028	-3.64358
PLEKHG2	0.363493	3.71378	2.20881	0.0408733	0.762028	-3.64529
FRMD6-AS1	0.37646	4.67098	2.20786	0.0409505	0.762028	-3.6467
SOCS2-AS1	0.368038	3.63643	2.20734	0.0409927	0.762028	-3.64747
SMIM18	0.409992	2.62497	2.20644	0.0410659	0.762028	-3.6488
RPPH1-2P	0.365714	2.52964	2.20587	0.041112	0.762028	-3.64964
CATSPER4	0.386432	2.34868	2.20483	0.0411969	0.763065	-3.65118
SHISA7	0.384136	4.07393	2.20434	0.0412373	0.763066	-3.65191
HNRNPDL	0.416407	8.55396	2.20387	0.0412756	0.763066	-3.65261
GBP1P1	0.469682	6.73957	2.20292	0.0413531	0.763885	-3.65401
TRIM43B	0.37346	2.92322	2.20181	0.0414438	0.764268	-3.65564
ROPN1L	0.368166	3.47497	2.19948	0.0416354	0.764268	-3.65908
TRIM5	0.49993	3.80335	2.19871	0.0416986	0.764268	-3.66022
NADK2-AS1	0.371376	2.23851	2.19862	0.0417061	0.764268	-3.66035
DCAF13P2	0.38526	3.08134	2.19747	0.0418013	0.76433	-3.66205
PTPN2P1	0.349404	2.78731	2.196	0.041923	0.76433	-3.66422
ABCA8	0.602506	6.32937	2.19547	0.041967	0.76433	-3.665
TBC1D19	0.375462	4.30431	2.19166	0.0422836	0.76433	-3.67061
IGLV1-47	0.511204	5.44099	2.1905	0.0423803	0.76433	-3.67231
TLR7	0.393915	3.34896	2.19039	0.04239	0.76433	-3.67248
OSTC	0.46576	5.12012	2.1889	0.0425144	0.76433	-3.67467
SALL4P7	0.435224	3.83715	2.18869	0.0425326	0.76433	-3.67499
ZNF300	0.382987	3.88797	2.18867	0.0425344	0.76433	-3.67502
PPP1R10P1	0.342135	3.03216	2.18775	0.0426114	0.76433	-3.67637
PKIA	0.468072	2.93596	2.1866	0.0427085	0.76433	-3.67807
PSTPIP2	0.379438	2.68414	2.18653	0.0427137	0.76433	-3.67816
ARHGEF19-AS1	0.405084	3.47407	2.18601	0.042758	0.76433	-3.67893
ZSCAN31	0.403506	2.63615	2.18517	0.0428285	0.76433	-3.68016
ZNF333	0.382095	3.45956	2.18487	0.0428538	0.76433	-3.6806
CFH	0.415418	3.0899	2.18444	0.042891	0.76433	-3.68124
SCUBE2	0.512679	2.24619	2.18413	0.0429169	0.76433	-3.6817
OR11L1	0.358585	2.75127	2.18063	0.0432138	0.765528	-3.68683
RPL4P1	0.355154	2.82453	2.18055	0.0432211	0.765528	-3.68696
SERPINE1	0.66129	4.6419	2.18035	0.0432377	0.765528	-3.68725
ADAM22	0.594367	4.55076	2.18009	0.0432597	0.765528	-3.68763
CNTN4	0.589525	3.55622	2.17934	0.0433237	0.765528	-3.68873
PIGT	0.362435	5.20685	2.17772	0.0434625	0.765528	-3.69111
TAS2R41	0.351156	2.05146	2.17772	0.0434628	0.765528	-3.69112
STK19	0.399682	4.21083	2.17711	0.0435147	0.765528	-3.692
ADAM20	0.382454	4.10787	2.17579	0.0436281	0.765528	-3.69394
NID2	0.439138	3.29353	2.17445	0.0437436	0.765528	-3.69591
MTND6P24	0.376347	4.05434	2.17361	0.0438158	0.765528	-3.69714
PPIAP33	0.420218	3.75275	2.17285	0.0438815	0.765528	-3.69826
TUSC3	0.417263	5.65973	2.1721	0.0439465	0.766168	-3.69936
TMEM72	0.360908	3.78846	2.17131	0.0440149	0.766168	-3.70052
ADAM20P2	0.371132	1.82081	2.17113	0.0440304	0.766168	-3.70078
ZNF521	0.441921	2.41613	2.16942	0.0441793	0.76727	-3.7033
JOSD1	0.402922	5.44455	2.16941	0.04418	0.76727	-3.70331
SCAPER	0.351735	4.38621	2.16863	0.0442472	0.76727	-3.70444
ELOVL5	0.461945	5.33972	2.16569	0.0445046	0.767877	-3.70876
COL14A1	0.686595	5.24758	2.16535	0.0445342	0.767877	-3.70926
DUSP1	0.447367	4.36311	2.16516	0.0445505	0.767877	-3.70953
ALKBH8	0.411255	2.28433	2.16268	0.0447681	0.76828	-3.71316
ARHGAP42P1	0.375445	3.14868	2.16242	0.0447916	0.76828	-3.71355
TMEM179	0.352191	3.94161	2.16187	0.0448399	0.76828	-3.71435
AGGF1P2	0.372224	2.4915	2.16061	0.0449512	0.76828	-3.71619
RGS4	0.518314	4.29104	2.16038	0.0449711	0.76828	-3.71652
IGKV1-6	0.39353	4.42076	2.15842	0.0451444	0.76828	-3.71939
THAP5	0.352302	3.72158	2.15724	0.0452492	0.76828	-3.72111
VASH2	0.468641	2.26068	2.15679	0.0452891	0.76828	-3.72177
SMAP2	0.388033	5.77809	2.15642	0.0453222	0.76828	-3.72231
ZNF25	0.577187	3.14421	2.15636	0.0453281	0.76828	-3.72241
CREBBP	0.335036	5.93987	2.15605	0.0453554	0.76828	-3.72286
TTLL8	0.447802	2.94639	2.15485	0.0454621	0.76828	-3.72461
TGFB2	0.423972	3.7031	2.15413	0.0455267	0.76828	-3.72566
ERV3-1	0.439926	6.49376	2.15372	0.045563	0.76828	-3.72625
EIF2B3	0.42773	5.60722	2.1531	0.0456191	0.76828	-3.72717
THBS1	0.40329	5.95877	2.15282	0.0456442	0.76828	-3.72758
TAB2	0.419608	5.47486	2.15259	0.045664	0.76828	-3.7279
TM4SF1-AS1	0.429635	3.60377	2.15199	0.0457183	0.76828	-3.72879
MORF4L1	0.378744	5.7393	2.15113	0.0457956	0.76828	-3.73004
CALD1	0.521291	7.53769	2.15097	0.0458098	0.76828	-3.73027
LRRC37A17P	0.424435	4.27818	2.15039	0.0458624	0.76828	-3.73113
ZNF861P	0.379812	2.92808	2.15014	0.0458842	0.76828	-3.73148
GNG11	0.577395	3.88747	2.14792	0.0460845	0.770483	-3.73472
TBX18	0.397775	1.97818	2.14479	0.046368	0.772897	-3.73928
ATP6V0A2	0.380683	5.12819	2.14469	0.0463772	0.772897	-3.73943
BACE1	0.339954	5.43464	2.14461	0.0463848	0.772897	-3.73955
RGCC	0.52396	4.33579	2.14354	0.0464818	0.773337	-3.7411
NPC2	0.471297	7.2167	2.138	0.0469894	0.776601	-3.74918
TRAJ47	0.483313	4.94872	2.13769	0.047018	0.776601	-3.74963
ZNF45	0.380978	2.59128	2.13657	0.0471211	0.777436	-3.75126
PITPNA-AS1	0.456568	5.19836	2.13367	0.047389	0.779876	-3.75547
MAST4	0.401498	4.99452	2.13167	0.0475749	0.781052	-3.75838
HSPE1P11	0.352826	4.28977	2.12977	0.0477523	0.782492	-3.76114
TVP23CP1	0.388177	3.85078	2.12863	0.0478588	0.782492	-3.7628
FNDC3B	0.539786	7.8938	2.12837	0.0478826	0.782492	-3.76317
IGKV1D-13	0.369158	5.22779	2.1279	0.0479268	0.782595	-3.76385
CCDC88A	0.437437	3.83669	2.12717	0.0479947	0.782682	-3.76491
RPL30P13	0.41928	2.75023	2.12641	0.0480665	0.782682	-3.76601
TMC3	0.399625	2.99878	2.12628	0.0480784	0.782682	-3.7662
ARHGEF6	0.357202	4.4537	2.12561	0.0481414	0.782682	-3.76717
STK3	0.36869	4.1776	2.12488	0.0482108	0.783018	-3.76824
RCAN2	0.467438	4.44834	2.12312	0.0483765	0.783148	-3.77079
RPL17P19	0.367065	2.70377	2.12307	0.0483816	0.783148	-3.77087
AFF1	0.549472	6.56363	2.12266	0.0484197	0.783148	-3.77145
PFN1P11	0.365847	4.06473	2.12123	0.048555	0.78345	-3.77352
AIG1P1	0.397412	3.30591	2.12005	0.0486676	0.78345	-3.77524
CMTR2	0.466141	4.47936	2.11998	0.0486738	0.78345	-3.77534
OR4Q3	0.348862	3.35897	2.1197	0.048701	0.78345	-3.77575
SNORD114-4	0.36299	1.92961	2.11895	0.0487721	0.78345	-3.77683
PCDH11X	0.354581	4.23233	2.1181	0.0488524	0.78345	-3.77806
PDE5A	0.428664	3.28952	2.11762	0.0488982	0.78345	-3.77875
MTND6P2	0.408237	2.9697	2.11708	0.04895	0.78345	-3.77954
FGF7P1	0.373068	4.43103	2.11703	0.0489548	0.78345	-3.77961
ARL1	0.513459	4.26025	2.11636	0.049019	0.783639	-3.78058
ITGA5	0.595916	6.32875	2.11553	0.0490986	0.784371	-3.78179
MNDA	0.389107	3.51383	2.11448	0.0491991	0.784599	-3.7833
ZDHHC15	0.581721	3.17259	2.11272	0.0493679	0.786521	-3.78585
SDCBP2	0.338596	4.55212	2.11193	0.0494445	0.786521	-3.78699
RNF38	0.501109	5.72638	2.11157	0.0494793	0.786521	-3.78752
URGCP	0.472715	4.95614	2.11091	0.0495424	0.786856	-3.78846
SURF4	0.391946	7.22959	2.11006	0.0496246	0.787133	-3.78969
SPRR2A	0.448196	2.76028	2.10949	0.0496801	0.787133	-3.79052
RANP8	0.375968	2.4825	2.10876	0.0497505	0.787133	-3.79157
MSC	0.383784	3.81455	2.10846	0.0497794	0.787133	-3.792
PTPRR	0.396914	4.62897	2.10796	0.0498276	0.787133	-3.79272
ZNF391	0.393802	3.18579	2.10666	0.0499542	0.787133	-3.7946
OR4D10	0.357519	1.9012	2.10657	0.0499634	0.787133	-3.79474
C12orf77	0.345832	2.37537	2.10524	0.0500926	0.788089	-3.79665
MT-TD	0.408804	1.92698	2.105	0.050116	0.788089	-3.797
KANK2	0.405929	5.93184	2.1047	0.0501458	0.788089	-3.79744
CTR9	0.399771	5.13959	2.10417	0.0501967	0.788089	-3.79819
SERTAD4-AS1	0.438407	3.7961	2.10417	0.0501973	0.788089	-3.7982
SUSD6	0.359414	6.7813	2.09937	0.0506686	0.790098	-3.80513
EGFLAM-AS3	0.370641	3.94798	2.09932	0.0506729	0.790098	-3.80519
TTC9	0.50287	3.85721	2.09873	0.0507313	0.790098	-3.80605
DLEC1	0.488058	3.49157	2.09815	0.0507886	0.790098	-3.80688
SLAMF7	0.530485	5.19047	2.09697	0.0509051	0.791014	-3.80858
CWF19L1	0.380039	4.04781	2.09586	0.0510154	0.792276	-3.81018
MAGEA8-AS1	0.396112	3.16331	2.09426	0.051174	0.793357	-3.81248
BMS1P11	0.344095	6.80688	2.09399	0.0512012	0.793357	-3.81288
PTPRA	0.479715	6.65073	2.09175	0.0514241	0.794504	-3.8161
TSSK4	0.338734	3.85637	2.09139	0.05146	0.794504	-3.81661
TIFA	0.375176	2.79949	2.09129	0.0514704	0.794504	-3.81676
GLI3	0.460987	4.20173	2.09104	0.0514951	0.794504	-3.81712
FAM86EP	0.398656	3.5014	2.08867	0.0517323	0.794504	-3.82052
IKBKB	0.369639	2.68363	2.08778	0.0518221	0.794504	-3.82181
MOSPD2	0.441313	4.29198	2.08725	0.0518759	0.794504	-3.82257
LSM3P5	0.347875	5.13523	2.08719	0.0518818	0.794504	-3.82266
TBCAP2	0.385149	3.75132	2.08676	0.0519247	0.794504	-3.82327
ESM1	0.33769	5.74256	2.08508	0.0520942	0.794504	-3.82568
SMAD4	0.391388	4.77103	2.08483	0.05212	0.794504	-3.82605
FRRS1	0.541977	4.07706	2.08472	0.0521307	0.794504	-3.8262
PRAMEF13	0.36307	3.98149	2.08415	0.0521881	0.794504	-3.82702
CNN3P1	0.342913	3.73116	2.08373	0.0522306	0.794504	-3.82762
PRR25	0.438274	3.95861	2.08318	0.0522869	0.794504	-3.82842
ATM	0.424432	6.63009	2.08234	0.0523718	0.794504	-3.82962
TBCK	0.37147	2.87158	2.08086	0.0525222	0.794504	-3.83174
ATP10D	0.506637	4.4677	2.08076	0.0525323	0.794504	-3.83188
ADGRG7	0.363607	2.63613	2.08056	0.0525532	0.794504	-3.83218
PTH2R	0.358183	4.43142	2.0801	0.0526001	0.794504	-3.83284
S100A12	0.458006	3.38875	2.08004	0.0526058	0.794504	-3.83292
PKMP1	0.365885	5.02047	2.07948	0.0526628	0.794504	-3.83372
CCDC136	0.357992	3.96945	2.07918	0.0526937	0.794504	-3.83415
OR7E111P	0.384158	4.78048	2.07913	0.052699	0.794504	-3.83423
HLA-DQA1	0.422707	5.99378	2.07861	0.0527517	0.794504	-3.83497
CBLB	0.401221	6.38915	2.07834	0.0527794	0.794504	-3.83536
FAM86MP	0.359433	5.32049	2.07761	0.0528544	0.794504	-3.83641
HTR2B	0.512763	2.47446	2.07694	0.0529227	0.794773	-3.83736
KRT23	0.348733	4.69861	2.07625	0.0529933	0.795395	-3.83835
RASSF8-AS1	0.420692	4.55514	2.0751	0.0531123	0.795422	-3.84001
SLFN12L	0.431569	2.90241	2.07476	0.0531466	0.795422	-3.84049
FBXO32	0.669226	5.67606	2.07446	0.0531778	0.795422	-3.84092
GSK3B	0.385383	6.30881	2.07297	0.0533312	0.795422	-3.84305
EAF2	0.388933	3.98564	2.07276	0.0533532	0.795422	-3.84335
PMP22	0.490446	6.65437	2.07199	0.0534325	0.795422	-3.84445
PRDM1	0.410907	6.65134	2.07198	0.0534334	0.795422	-3.84447
TSPYL5	0.339945	3.47921	2.0719	0.0534421	0.795422	-3.84459
ARHGEF3-AS1	0.335496	2.51652	2.0711	0.0535249	0.795422	-3.84573
MAB21L3	0.394137	3.92665	2.07096	0.053539	0.795422	-3.84593
SPCS2P3	0.405397	4.0961	2.07091	0.0535439	0.795422	-3.84599
OVOL1	0.387158	3.21944	2.07081	0.0535552	0.795422	-3.84615
ABCG1	0.354138	3.8718	2.07061	0.053575	0.795422	-3.84642
ADGRL4	0.405972	4.12983	2.07022	0.0536159	0.795422	-3.84699
PTGIS	0.414507	4.91256	2.07018	0.0536201	0.795422	-3.84705
IGHV4-61	0.422095	4.98325	2.06954	0.0536868	0.795422	-3.84796
ZNF652P1	0.338759	2.60191	2.06931	0.0537104	0.795422	-3.84829
CPXM1	0.445039	4.49524	2.06888	0.0537555	0.795422	-3.84891
UBE2Q2P1	0.404558	4.98822	2.06864	0.0537799	0.795422	-3.84925
S100A9	0.397166	4.90553	2.06862	0.0537817	0.795422	-3.84927
CMAHP	0.344461	4.11669	2.06731	0.0539184	0.795956	-3.85115
ZNF849P	0.3753	3.74019	2.06563	0.0540938	0.796163	-3.85355
MPRIP-AS1	0.352942	3.96685	2.06519	0.0541397	0.796163	-3.85418
NRBP1	0.330092	6.12156	2.0635	0.054317	0.796163	-3.85659
OR6E1P	0.336819	2.78824	2.06319	0.0543495	0.796163	-3.85703
HS2ST1	0.386212	3.4667	2.06239	0.0544334	0.796163	-3.85818
GUCY1A2	0.385406	2.87081	2.06189	0.0544867	0.796163	-3.8589
GDI1	0.388311	4.16089	2.06157	0.0545203	0.796163	-3.85935
PRKD1	0.659126	2.8625	2.06125	0.0545538	0.796163	-3.85981
CARD8-AS1	0.357272	3.28837	2.061	0.0545803	0.796163	-3.86017
CMTM3	0.462762	4.86819	2.06087	0.0545936	0.796163	-3.86035
GTF3C2	0.419755	3.42489	2.06035	0.0546484	0.796163	-3.86109
GYPC	0.425868	5.92491	2.05928	0.0547613	0.796958	-3.86261
PLEKHA7	0.366237	4.36032	2.05898	0.0547939	0.797007	-3.86305
SRY	0.408676	2.09269	2.0569	0.0550137	0.798589	-3.86601
FABP9	0.339367	2.46498	2.05647	0.0550597	0.798746	-3.86663
SCN4A	0.383956	2.64754	2.05481	0.0552363	0.799184	-3.86899
IGBP1P4	0.366482	3.53823	2.05328	0.0554002	0.799966	-3.87118
MRPL57P6	0.355956	2.09022	2.05321	0.0554075	0.799966	-3.87128
THBS2	0.564291	4.55251	2.05199	0.0555382	0.80015	-3.87302
HUS1B	0.383241	2.28685	2.05158	0.0555814	0.80015	-3.87359
ZNF432	0.384734	5.32661	2.05082	0.0556633	0.80015	-3.87468
TMEM47	0.391994	7.45552	2.05008	0.0557427	0.80015	-3.87573
SCARNA3	0.356065	5.36045	2.04954	0.0558007	0.800563	-3.8765
DPYD	0.50471	6.46086	2.04722	0.0560502	0.802619	-3.87979
CBX3P6	0.434001	2.94474	2.04636	0.0561439	0.803375	-3.88103
SIT1	0.349732	3.75266	2.04342	0.0564623	0.803569	-3.8852
RPS12P26	0.341049	3.85741	2.04334	0.0564707	0.803569	-3.88531
FAM227A	0.377154	3.67212	2.04303	0.0565047	0.803569	-3.88576
F3	0.505384	4.7272	2.0429	0.056519	0.803569	-3.88594
OR7A18P	0.352112	3.01921	2.04271	0.0565401	0.803569	-3.88622
TTLL7-IT1	0.327928	2.57033	2.04123	0.0567014	0.8048	-3.88832
FOLH1	0.414009	3.96887	2.04096	0.0567305	0.8048	-3.8887
NR3C1	0.474348	3.84738	2.04061	0.0567689	0.8048	-3.8892
SS18	0.559867	7.86319	2.03951	0.0568895	0.8048	-3.89076
TLR10	0.327668	2.32053	2.03811	0.0570429	0.8048	-3.89275
PCNPP5	0.384247	4.61942	2.03799	0.0570553	0.8048	-3.89291
FAM20C	0.414577	3.27726	2.03795	0.0570597	0.8048	-3.89297
RUNX3	0.404929	5.2178	2.03766	0.0570921	0.8048	-3.89338
COQ10A	0.369565	5.25653	2.03684	0.0571816	0.8048	-3.89454
ACTG1P23	0.397306	4.14501	2.0368	0.0571865	0.8048	-3.8946
PPIL2	0.442172	6.14802	2.03671	0.0571959	0.8048	-3.89473
CRISPLD2	0.410375	5.34722	2.03653	0.0572162	0.8048	-3.89499
ACTG1P17	0.339165	5.21701	2.0354	0.0573402	0.805101	-3.89658
NCKAP1	0.38827	3.25375	2.03467	0.0574211	0.805387	-3.89762
LTA	0.388512	3.26282	2.03455	0.0574349	0.805387	-3.8978
NAP1L4P1	0.338436	4.60415	2.03378	0.0575199	0.806164	-3.89889
GRIA3	0.462981	4.81455	2.03229	0.0576839	0.807319	-3.90099
HIGD1AP4	0.374803	2.39264	2.03195	0.0577224	0.807319	-3.90148
ARHGEF25	0.401715	2.60649	2.03105	0.0578224	0.807319	-3.90276
ROBO1	0.328747	5.34154	2.03092	0.0578369	0.807319	-3.90294
CPE	0.490741	2.90771	2.02967	0.0579751	0.807444	-3.9047
ZNF347	0.3438	3.38058	2.02959	0.0579846	0.807444	-3.90482
SNORA51	0.458536	3.2973	2.02922	0.0580252	0.807444	-3.90534
RBM24	0.34054	5.25779	2.02878	0.0580751	0.807467	-3.90597
FTO	0.328902	4.86033	2.0285	0.0581059	0.807467	-3.90636
LMO2	0.383638	3.6865	2.02841	0.0581156	0.807467	-3.90649
TRPM8	0.372097	3.44103	2.02746	0.0582222	0.808068	-3.90784
ATP6V0B	0.422561	4.62422	2.0274	0.0582291	0.808068	-3.90792
POPDC2	0.346766	4.12981	2.02723	0.0582477	0.808068	-3.90816
PLET1	0.390474	1.96028	2.02554	0.0584366	0.808303	-3.91055
AGT	0.395481	3.69871	2.02549	0.0584423	0.808303	-3.91062
BCAR1P1	0.353274	4.50118	2.02459	0.0585439	0.808303	-3.9119
SCTR	0.35047	2.97383	2.0229	0.0587343	0.809081	-3.91429
ATP6V1G1P3	0.361159	4.63817	2.02204	0.0588311	0.809081	-3.9155
FERMT2	0.436814	4.64888	2.02195	0.0588408	0.809081	-3.91562
LRRC8C	0.492294	4.31013	2.02155	0.0588862	0.809115	-3.91619
RNF2	0.373949	3.96708	2.02108	0.0589394	0.809419	-3.91686
IRGM	0.333334	2.46554	2.02008	0.0590525	0.809419	-3.91827
IGKV2D-28	0.547626	6.13431	2.01958	0.059109	0.809419	-3.91897
BMS1P9	0.344318	4.72153	2.0185	0.0592315	0.809419	-3.9205
TSPY21P	0.338582	3.34067	2.01793	0.0592956	0.809419	-3.92129
CXADRP2	0.402391	4.72838	2.01769	0.0593234	0.809419	-3.92164
NDUFB4P6	0.344683	3.08866	2.0153	0.0595959	0.809662	-3.92501
SPATA31D3	0.386385	2.81456	2.01478	0.0596556	0.809662	-3.92575
PAWRP1	0.35102	7.37999	2.01444	0.0596939	0.809662	-3.92622
RGL1	0.414272	4.07266	2.01419	0.0597226	0.809662	-3.92658
CAPS2	0.45378	2.12886	2.01405	0.0597389	0.809662	-3.92678
OR2I1P	0.403204	3.39726	2.01371	0.0597773	0.809662	-3.92725
ANO1	0.50513	5.51377	2.01327	0.0598282	0.809662	-3.92788
KRT8P12	0.318791	4.77278	2.01316	0.0598401	0.809662	-3.92802
CRYAB	0.506988	4.81072	2.01312	0.0598454	0.809662	-3.92809
SOCS5P3	0.338394	2.97155	2.0117	0.0600085	0.810025	-3.93009
SLIT2-IT1	0.392956	2.94733	2.01157	0.0600229	0.810025	-3.93027
PDS5B	0.332513	2.40994	2.00845	0.0603819	0.811885	-3.93466
MS4A6A	0.600404	7.11307	2.00804	0.0604301	0.811885	-3.93524
CASP4	0.46438	6.77473	2.00694	0.0605572	0.811885	-3.93679
SSMEM1	0.348275	2.72002	2.00625	0.0606373	0.811885	-3.93776
CTSH	0.340645	3.82319	2.00622	0.0606401	0.811885	-3.9378
ARL5AP4	0.446704	2.26006	2.00574	0.0606956	0.811885	-3.93847
FRG1KP	0.356992	3.07427	2.00535	0.060742	0.811885	-3.93903
NDUFB11P1	0.368351	5.24302	2.00526	0.0607514	0.811885	-3.93915
SHOX	0.358262	3.67456	2.00507	0.0607735	0.811885	-3.93941
ADIPOR1	0.400226	5.56754	2.00495	0.0607873	0.811885	-3.93958
NME5	0.346361	2.39556	2.00417	0.0608791	0.811885	-3.94069
SAR1B	0.32665	3.36193	2.00398	0.0609004	0.811885	-3.94095
LCA5	0.375123	2.90791	2.00059	0.061297	0.814926	-3.94572
CD59	0.382745	7.06921	2.00008	0.0613561	0.814926	-3.94643
TRIAP1	0.382196	3.35456	1.99854	0.061537	0.814926	-3.94859
MSX2	0.36133	4.30203	1.99799	0.061602	0.814926	-3.94937
NR4A2	0.359039	3.58966	1.99796	0.0616048	0.814926	-3.9494
HIGD1AP3	0.334307	3.14136	1.99674	0.0617488	0.814926	-3.95112
CDC40	0.374118	3.44038	1.99664	0.0617609	0.814926	-3.95126
FAM106B	0.336967	3.14847	1.99597	0.0618394	0.814926	-3.9522
ATP13A4-AS1	0.31516	3.71542	1.99541	0.0619054	0.815108	-3.95298
BIN2	0.383337	4.01526	1.99516	0.0619357	0.815108	-3.95334
MAGEB16	0.3392	3.89349	1.99462	0.0619996	0.815108	-3.9541
PRR13P3	0.36983	5.49598	1.99437	0.0620282	0.815108	-3.95444
SUPT20HL1	0.353095	3.18242	1.99428	0.0620392	0.815108	-3.95457
MEIS3	0.53693	5.16409	1.99369	0.0621094	0.815637	-3.9554
AK5	0.352026	2.25661	1.99284	0.0622101	0.815802	-3.95659
ADAMTS1	0.569087	3.54105	1.99283	0.0622116	0.815802	-3.95661
TMEM156	0.391956	2.35278	1.99204	0.0623054	0.816382	-3.95771
CREB3L2	0.332697	5.21446	1.99133	0.0623891	0.816943	-3.9587
IGKV1D-33	0.434248	5.64516	1.98856	0.0627198	0.817001	-3.96258
DUXAP8	0.382929	6.97604	1.98819	0.0627641	0.817001	-3.9631
BORCS8	0.323647	6.12914	1.98801	0.0627855	0.817001	-3.96335
OMA1	0.367976	3.47041	1.98731	0.0628699	0.817001	-3.96434
IGLC4	0.414417	4.63231	1.98668	0.0629442	0.817001	-3.96521
DCLK1	0.579778	3.949	1.98637	0.0629819	0.817001	-3.96565
IGKV4-1	0.485435	3.4245	1.98623	0.0629987	0.817001	-3.96584
ENPP7P1	0.350264	4.66961	1.98599	0.063028	0.817001	-3.96618
UNC119B	0.473699	2.9004	1.98483	0.0631674	0.817001	-3.9678
CNN3	0.475271	6.30093	1.98471	0.063181	0.817001	-3.96796
TOR1AIP1	0.401843	5.11427	1.98337	0.0633425	0.817001	-3.96984
SF3B1	0.379849	3.09273	1.98214	0.0634916	0.817001	-3.97156
B3GLCT	0.352536	4.17342	1.98212	0.0634943	0.817001	-3.97159
GRAMD1A	0.390563	5.18331	1.98209	0.0634979	0.817001	-3.97164
BACH2	0.402614	3.19499	1.98197	0.0635122	0.817001	-3.9718
EDDM3DP	0.312701	2.29993	1.98151	0.0635674	0.817001	-3.97244
GOLGA5	0.368178	4.48994	1.98147	0.0635727	0.817001	-3.9725
HNRNPA1P24	0.339688	2.95523	1.97956	0.0638042	0.817547	-3.97517
C4orf17	0.394571	2.69808	1.97888	0.0638861	0.817547	-3.97611
ARRDC3	0.47515	5.33698	1.97886	0.0638894	0.817547	-3.97615
SLC30A1	0.361646	3.64654	1.97795	0.0639995	0.818031	-3.97741
IGKV2D-24	0.462364	3.53742	1.97768	0.0640327	0.818064	-3.97779
NACAD	0.366761	3.60651	1.97648	0.0641782	0.818064	-3.97946
SNX24	0.426769	4.25441	1.97633	0.0641968	0.818064	-3.97967
EML1	0.379202	2.35862	1.97586	0.0642544	0.818064	-3.98033
ARMC2-AS1	0.336653	2.0023	1.97578	0.0642636	0.818064	-3.98043
NENFP3	0.356061	3.46887	1.97519	0.0643368	0.818064	-3.98127
SSPN	0.493026	6.08224	1.97175	0.0647584	0.820145	-3.98606
GCH1	0.324469	2.66845	1.97141	0.0648003	0.820145	-3.98653
GYG1P3	0.32857	3.65337	1.97109	0.0648398	0.820145	-3.98698
AEBP1	0.441968	5.97972	1.97043	0.0649204	0.820145	-3.98789
PCSK5	0.410911	4.53564	1.96936	0.0650525	0.820145	-3.98938
STEAP3-AS1	0.380112	3.20743	1.9691	0.0650851	0.820145	-3.98975
CMTM7	0.498048	3.98702	1.96907	0.0650881	0.820145	-3.98978
OR10R1P	0.328299	2.05872	1.96849	0.06516	0.820145	-3.99059
SNORD116-2	0.531216	2.99539	1.96778	0.0652479	0.820543	-3.99158
TNFSF8	0.370058	4.43526	1.9665	0.0654064	0.821779	-3.99336
LEF1	0.388559	6.43746	1.96492	0.0656035	0.822483	-3.99556
NIFKP2	0.386706	2.37131	1.96377	0.0657464	0.822483	-3.99716
ATF5	0.340423	5.14743	1.9628	0.0658678	0.823031	-3.99851
RAB3B	0.30586	3.98645	1.96052	0.0661535	0.82509	-4.00168
C1QTNF3	0.425396	3.80908	1.95978	0.0662457	0.825123	-4.0027
CD84	0.478834	3.58485	1.95614	0.0667039	0.825123	-4.00775
HECTD2	0.409463	4.82373	1.95578	0.0667495	0.825123	-4.00825
OR52E3P	0.356519	2.95872	1.95553	0.0667812	0.825123	-4.0086
C11orf97	0.337446	2.57614	1.9552	0.0668229	0.825123	-4.00905
C17orf78	0.401725	2.67694	1.95505	0.0668422	0.825123	-4.00926
ZBTB20	0.335181	6.32895	1.95399	0.066976	0.825123	-4.01073
BNIP3P36	0.324275	1.6174	1.95397	0.0669783	0.825123	-4.01075
TRAJ22	0.465564	3.7915	1.95359	0.0670269	0.825123	-4.01129
PRELID3A	0.365999	2.89175	1.95235	0.0671839	0.825123	-4.013
KLK11	0.37397	3.80115	1.94988	0.0674998	0.825123	-4.01643
VAMP2	0.326998	5.17151	1.94791	0.0677514	0.825123	-4.01915
TEKT4P2	0.378369	4.5647	1.9476	0.0677908	0.825123	-4.01958
TCF7L1-IT1	0.364956	2.94745	1.947	0.0678677	0.825123	-4.02041
RRAGA	0.347783	5.32073	1.94645	0.0679383	0.825123	-4.02117
FAM197Y9	0.351397	4.52339	1.94505	0.0681187	0.825123	-4.02311
CDH7	0.324034	3.73306	1.94394	0.068262	0.825123	-4.02465
CEP295NL	0.449404	6.75644	1.94391	0.0682652	0.825123	-4.02468
CDKL2	0.440769	2.49213	1.94366	0.0682981	0.825123	-4.02503
TAS2R15P	0.454084	4.9582	1.9436	0.0683057	0.825123	-4.02511
SMAD3	0.361274	5.29651	1.93924	0.0688697	0.825123	-4.03113
RGS12	0.329328	3.10786	1.93818	0.0690076	0.825123	-4.03259
FAM197Y5	0.33637	3.44937	1.93807	0.0690224	0.825123	-4.03275
FAM197Y4	0.33637	3.44937	1.93807	0.0690224	0.825123	-4.03275
IL6R	0.337287	5.04883	1.93787	0.0690489	0.825123	-4.03303
INPPL1	0.350824	5.36959	1.93709	0.0691502	0.825123	-4.0341
RETSAT	0.373907	5.83006	1.9367	0.0692012	0.825123	-4.03464
CACNB2	0.356442	3.08651	1.93646	0.0692326	0.825123	-4.03497
CAPN14	0.316188	3.23324	1.93634	0.0692482	0.825123	-4.03513
SNORD113-9	0.370982	4.05489	1.93489	0.0694376	0.825123	-4.03713
TBC1D10C	0.365067	5.41363	1.93358	0.0696087	0.825123	-4.03893
PLIN2	0.333382	5.65572	1.93302	0.0696834	0.825123	-4.03971
AP1B1	0.362379	5.80345	1.93285	0.0697045	0.825123	-4.03993
IGKV1OR9-1	0.647558	5.13301	1.93208	0.0698064	0.825123	-4.041
ZBED1P1	0.34417	2.8881	1.93159	0.0698709	0.825123	-4.04168
NLRP9	0.319708	3.63014	1.93135	0.0699022	0.825123	-4.042
HIF1A-AS2	0.360443	3.46149	1.93032	0.0700384	0.825123	-4.04342
TLR4	0.449526	4.46007	1.93017	0.0700578	0.825123	-4.04363
GPR107	0.363179	4.92638	1.93014	0.0700616	0.825123	-4.04367
CDC42BPA	0.319617	4.3872	1.9291	0.070199	0.825123	-4.0451
KRT2	0.310925	2.08095	1.92887	0.0702294	0.825123	-4.04541
SWT1	0.373979	2.04371	1.92862	0.0702625	0.825123	-4.04576
TIMELESS	0.349825	2.36385	1.92783	0.0703679	0.825123	-4.04685
SUCLG2-AS1	0.338595	5.87551	1.92699	0.0704783	0.825123	-4.048
ROS1	0.318812	2.17066	1.92652	0.070541	0.825123	-4.04865
CYP2F1	0.376103	2.82516	1.9262	0.0705842	0.825123	-4.04909
SELPLG	0.347644	4.25577	1.92586	0.0706283	0.825123	-4.04955
MAT2A	0.45788	3.82001	1.92571	0.0706487	0.825123	-4.04976
PPP2R1B	0.304422	2.29609	1.92537	0.0706938	0.825123	-4.05023
TRNP1	0.374117	4.7107	1.92487	0.0707607	0.825123	-4.05092
CCM2	0.434133	4.69359	1.924	0.0708769	0.825123	-4.05212
PAPSS1	0.476007	3.61612	1.92311	0.0709955	0.825123	-4.05334
MED12	0.335697	2.15904	1.92287	0.0710279	0.825123	-4.05367
LMBRD1	0.360076	6.16252	1.92229	0.0711056	0.825123	-4.05447
TDGF1P2	0.342846	3.48031	1.9222	0.0711167	0.825123	-4.05458
DENND4A	0.323152	5.14584	1.92183	0.071166	0.825123	-4.05509
GPATCH11	0.399669	4.10211	1.92144	0.0712189	0.825123	-4.05563
CT45A7	0.400406	1.92933	1.92018	0.0713872	0.825123	-4.05735
ADGRF5	0.331972	4.60124	1.91997	0.0714155	0.825123	-4.05764
RERGL	0.313599	4.03513	1.91889	0.0715612	0.825123	-4.05913
SMIM9	0.354824	2.14842	1.91843	0.0716234	0.825123	-4.05976
EIF4EBP2P2	0.368927	2.94534	1.91759	0.0717364	0.825123	-4.06091
HTRA3	0.332936	4.79266	1.91688	0.0718312	0.825123	-4.06187
IL6STP1	0.356414	4.26251	1.91684	0.0718367	0.825123	-4.06193
PTTG1IP	0.380448	4.83501	1.91624	0.0719181	0.825123	-4.06276
SLAMF6	0.385721	2.80469	1.91585	0.0719709	0.825123	-4.06329
LRCH2	0.332907	2.02277	1.91486	0.0721047	0.825123	-4.06465
ALCAM	0.358707	4.51444	1.91433	0.0721765	0.825123	-4.06537
SSH1	0.323676	5.4771	1.9142	0.072195	0.825123	-4.06556
TRBV14	0.349908	3.82628	1.9125	0.072425	0.825123	-4.06788
HEATR9	0.309213	2.43507	1.91217	0.0724702	0.825123	-4.06833
RTN1	0.314062	3.29208	1.91198	0.0724958	0.825123	-4.06859
IQCF2	0.387303	3.0806	1.91175	0.0725268	0.825123	-4.0689
ITGAV	0.423449	3.17381	1.91174	0.0725289	0.825123	-4.06892
NID1	0.350546	4.83312	1.91106	0.0726211	0.825123	-4.06985
MAOA	0.340795	5.50101	1.91052	0.0726948	0.825123	-4.07059
BNIP3P16	0.337583	1.90533	1.91045	0.0727044	0.825123	-4.07069
PPM1A	0.347577	7.98532	1.91041	0.0727096	0.825123	-4.07074
TMSB10P2	0.304574	8.98788	1.91003	0.0727623	0.825123	-4.07127
GMNC	0.338955	2.29102	1.90998	0.0727686	0.825123	-4.07133
TRIM26	0.338502	4.83649	1.90978	0.072796	0.825123	-4.0716
ZNF568	0.329925	4.22484	1.90965	0.072814	0.825123	-4.07178
E2F3P1	0.309557	3.75475	1.90942	0.0728447	0.825123	-4.07209
AZIN2	0.425083	4.10392	1.90783	0.0730626	0.825123	-4.07427
SYNE1	0.326696	4.2498	1.90775	0.0730731	0.825123	-4.07437
CEACAMP11	0.358749	4.13671	1.90726	0.0731407	0.825123	-4.07505
VTRNA1-3	0.352832	6.32101	1.90719	0.0731499	0.825123	-4.07514
VN1R92P	0.333701	2.77398	1.90684	0.0731986	0.825123	-4.07562
RPL32P35	0.462776	3.29629	1.90551	0.0733808	0.825123	-4.07743
KRT84	0.375562	2.95746	1.90451	0.0735186	0.825123	-4.0788
GDPGP1	0.416791	3.41984	1.9041	0.0735758	0.825123	-4.07937
NRIP1	0.311887	4.72179	1.90331	0.0736842	0.825123	-4.08044
ZNF595	0.343115	4.75632	1.90269	0.0737701	0.825123	-4.08129
TP53I13	0.335075	3.1051	1.90264	0.073777	0.825123	-4.08136
SMIM23	0.325076	2.32849	1.90255	0.073789	0.825123	-4.08148
APEX2	0.306002	3.48748	1.90221	0.0738364	0.825123	-4.08194
THAP1	0.3495	4.4942	1.90212	0.0738482	0.825123	-4.08206
IGLV3-17	0.323699	2.84293	1.90189	0.0738805	0.825123	-4.08238
TUBB4BP4	0.344449	2.90689	1.90142	0.0739454	0.825123	-4.08302
DDX3Y	0.490163	3.66884	1.90123	0.0739717	0.825123	-4.08328
JRKL-AS1	0.318235	5.26715	1.90005	0.0741353	0.825123	-4.08489
ZFP69B	0.317227	2.77219	1.89908	0.0742698	0.825123	-4.08621
WDR25	0.323742	4.31147	1.89885	0.0743025	0.825123	-4.08653
ZNF876P	0.318243	2.3549	1.89845	0.0743585	0.825123	-4.08707
PNPLA3	0.394878	3.46097	1.89835	0.0743719	0.825123	-4.08721
GPR83	0.486561	3.32129	1.89812	0.0744036	0.825123	-4.08752
EMC3	0.361793	4.61329	1.8981	0.0744067	0.825123	-4.08755
TIAM2	0.451495	3.98837	1.89778	0.0744512	0.8252	-4.08798
TMSB15B	0.343022	2.32401	1.89723	0.0745273	0.82543	-4.08873
ORMDL1	0.395815	4.11639	1.89703	0.0745554	0.82543	-4.089
RPL27P12	0.386896	3.40267	1.89667	0.0746058	0.825512	-4.08949
DPYSL3	0.345656	3.83015	1.89655	0.0746232	0.825512	-4.08966
FCGR2C	0.467054	4.75644	1.89573	0.0747369	0.82558	-4.09077
POLI	0.407113	4.15988	1.89503	0.0748357	0.82558	-4.09173
COL1A1	0.420273	6.74084	1.89476	0.0748732	0.82558	-4.0921
FRMD8P1	0.332889	3.48488	1.89445	0.0749165	0.82558	-4.09252
ALPK2	0.385256	3.83493	1.89277	0.0751521	0.82558	-4.0948
RBMY2JP	0.399809	3.0795	1.89231	0.0752167	0.82558	-4.09543
SKOR2	0.305904	2.43983	1.89133	0.0753551	0.82558	-4.09676
OR4C12	0.39146	2.92514	1.89104	0.0753952	0.825688	-4.09715
CYP8B1	0.310959	3.03961	1.89081	0.0754283	0.825719	-4.09747
SLC10A1	0.361783	5.64694	1.88989	0.0755579	0.826144	-4.09872
WWTR1	0.366681	5.87968	1.88948	0.0756157	0.826349	-4.09928
RPL7AP72	0.324239	2.92726	1.88928	0.0756432	0.826349	-4.09954
CACNG3	0.325743	2.65495	1.8886	0.0757406	0.826817	-4.10048
CALCB	0.311358	3.98763	1.88785	0.075846	0.827306	-4.10149
TUSC7	0.330914	3.07477	1.88762	0.0758792	0.827338	-4.10181
PRKACB	0.433782	4.44419	1.88713	0.0759481	0.827525	-4.10247
CT45A10	0.370947	1.94324	1.8862	0.0760808	0.827777	-4.10374
TRPV4	0.393046	2.96578	1.88612	0.0760909	0.827777	-4.10383
SP140	0.34051	4.6409	1.88492	0.0762626	0.827777	-4.10547
KCTD1	0.421578	5.12563	1.88481	0.0762775	0.827777	-4.10561
OR2Y1	0.420343	2.77994	1.88456	0.0763136	0.827777	-4.10596
CD200	0.544892	4.40224	1.88359	0.0764519	0.828029	-4.10727
LIMS1	0.393334	2.94554	1.88214	0.0766586	0.828556	-4.10924
NBPF7	0.33504	3.72013	1.88164	0.0767308	0.829008	-4.10992
FOXCUT	0.308176	5.39646	1.88029	0.0769243	0.829271	-4.11175
DOCK11	0.450689	4.3557	1.88015	0.0769443	0.829271	-4.11194
KIAA1328	0.360736	3.05582	1.88	0.076966	0.829271	-4.11214
HLA-DMB	0.410678	6.99151	1.87968	0.077011	0.829271	-4.11257
HIVEP1	0.376383	6.78298	1.87804	0.0772477	0.829271	-4.1148
TMEM229A	0.397666	2.45202	1.87774	0.0772897	0.829271	-4.11519
TMEM19	0.323242	3.10959	1.87762	0.0773074	0.829271	-4.11536
CDC42EP3	0.377858	4.84435	1.87749	0.0773258	0.829271	-4.11553
IGKV1D-35	0.319976	5.05077	1.87625	0.0775057	0.829271	-4.11722
B3GNT6	0.376629	4.40697	1.87611	0.0775247	0.829271	-4.1174
FEM1B	0.296707	4.73324	1.87592	0.0775535	0.829271	-4.11767
RASAL2-AS1	0.33048	2.6195	1.87571	0.0775829	0.829271	-4.11794
SETP16	0.300116	2.05099	1.87534	0.0776372	0.829271	-4.11845
POTEA	0.332637	2.1173	1.87521	0.0776552	0.829271	-4.11862
OR10H2	0.373593	4.09336	1.87486	0.0777061	0.829271	-4.1191
RHOC	0.392311	4.70182	1.8741	0.0778159	0.829271	-4.12012
ITM2B	0.513102	9.39033	1.874	0.0778311	0.829271	-4.12026
RAB11A	0.335319	5.51532	1.87385	0.0778528	0.829271	-4.12047
VEGFC	0.478411	4.74316	1.8714	0.0782088	0.830897	-4.12378
HCG4P3	0.326771	4.35704	1.87077	0.0782997	0.831313	-4.12462
MED28	0.394077	3.8449	1.87067	0.0783143	0.831313	-4.12476
ATP6V0E1	0.352357	9.42239	1.86886	0.0785792	0.831762	-4.12721
SNRPN	0.44703	4.09659	1.86865	0.078609	0.831762	-4.12748
CD109	0.313924	4.17725	1.86842	0.0786425	0.831762	-4.12779
TRIM77BP	0.308982	2.42566	1.86782	0.0787309	0.831762	-4.12861
SULT1C2P2	0.312752	3.09254	1.86695	0.078858	0.831762	-4.12978
TRAV26-2	0.422451	2.53201	1.86634	0.0789479	0.831762	-4.1306
FGD5-AS1	0.312242	5.36404	1.86409	0.0792793	0.831762	-4.13364
RPL7P51	0.352946	3.09858	1.86379	0.0793225	0.831762	-4.13404
ZSCAN26	0.443422	4.78634	1.86378	0.079325	0.831762	-4.13406
PEX16	0.320674	4.82103	1.86257	0.0795025	0.831762	-4.13568
TENM4	0.395687	3.0406	1.86239	0.0795292	0.831762	-4.13593
CCDC184	0.38507	4.30666	1.86237	0.0795323	0.831762	-4.13595
APOC1P1	0.478845	5.36129	1.86155	0.0796529	0.831762	-4.13705
LMOD1	0.361484	4.37202	1.86144	0.0796693	0.831762	-4.1372
ZNF658	0.365318	3.38524	1.86126	0.0796964	0.831762	-4.13745
CT45A3	0.377919	2.0815	1.86095	0.0797424	0.831762	-4.13787
SIRT2	0.295972	5.9331	1.86058	0.0797971	0.831762	-4.13836
ZNF268	0.381488	3.75699	1.86022	0.0798502	0.831762	-4.13885
CEP135	0.329741	2.90814	1.85997	0.0798883	0.831762	-4.13919
CDKL1	0.391285	3.91788	1.85802	0.0801774	0.831762	-4.14181
CTSA	0.300959	7.32604	1.85757	0.0802439	0.831762	-4.14241
GAPDHP34	0.299143	2.92022	1.85726	0.0802903	0.831762	-4.14283
UNC119	0.29922	5.71924	1.85628	0.0804362	0.831762	-4.14415
NAA35	0.312391	4.59172	1.85539	0.0805694	0.831762	-4.14535
RHOQP2	0.302661	5.38129	1.85537	0.0805722	0.831762	-4.14537
GTF2B	0.331781	4.70687	1.85524	0.0805912	0.831762	-4.14554
P3H4	0.319879	3.30746	1.85346	0.0808585	0.831762	-4.14794
SGPP1	0.395235	3.60852	1.8534	0.0808667	0.831762	-4.14802
USP28	0.313158	2.09496	1.85317	0.0809012	0.831762	-4.14832
LRRC37B	0.331785	3.26387	1.85202	0.0810751	0.831835	-4.14988
DUSP14	0.359396	3.91558	1.85173	0.0811174	0.831956	-4.15026
GRK5-IT1	0.347292	3.47907	1.85039	0.0813198	0.832543	-4.15206
ASCC3	0.325372	4.19828	1.84884	0.0815541	0.833617	-4.15415
CD48	0.499754	4.30033	1.84857	0.0815942	0.833714	-4.1545
MED21	0.356835	3.35867	1.84637	0.0819277	0.836029	-4.15746
RBMS3-AS1	0.298834	1.87986	1.84611	0.0819663	0.836029	-4.1578
KATNBL1	0.334118	2.28275	1.84608	0.0819716	0.836029	-4.15784
PC	0.375079	5.55948	1.84586	0.0820045	0.836029	-4.15813
PDE4D	0.373832	4.01726	1.8448	0.0821655	0.836169	-4.15955
CRYZP1	0.318333	4.85896	1.84373	0.0823281	0.836169	-4.16098
OTP	0.378895	4.58255	1.84356	0.0823546	0.836169	-4.16122
NGRN	0.328652	5.11068	1.84283	0.082465	0.836169	-4.16219
PRYP2	0.384205	3.88707	1.84198	0.0825957	0.836169	-4.16333
C7	0.498473	3.01932	1.84081	0.0827737	0.836169	-4.16489
ELMO2	0.380099	4.56259	1.84049	0.0828238	0.836169	-4.16533
CYLC2	0.357152	2.67509	1.84017	0.0828729	0.836169	-4.16576
MEG8	0.397041	4.91355	1.83933	0.0830013	0.837021	-4.16688
EMP1	0.355648	4.87531	1.8392	0.0830215	0.837021	-4.16705
PTCH2	0.313245	4.48522	1.83876	0.0830885	0.837094	-4.16764
CBX3P8	0.34444	3.48263	1.83848	0.0831316	0.837204	-4.16801
OR7E85P	0.300168	3.90469	1.83816	0.0831805	0.837387	-4.16844
RPL9P31	0.363494	2.63796	1.83745	0.0832896	0.837522	-4.16939
VTA1	0.327502	4.61045	1.83655	0.0834285	0.837522	-4.17059
ACTR3BP6	0.32297	5.65852	1.83628	0.08347	0.837522	-4.17095
TMEM202	0.318177	2.50954	1.83589	0.08353	0.837817	-4.17147
STX8	0.388872	4.85416	1.83548	0.0835939	0.838027	-4.17202
SLC9A7P1	0.308816	3.74088	1.8349	0.0836832	0.838027	-4.17279
GPR161	0.355627	3.56847	1.83447	0.0837501	0.838027	-4.17337
SPDYE1	0.304187	3.30547	1.83423	0.0837871	0.838027	-4.17369
HTRA1	0.317585	4.40168	1.83396	0.0838283	0.838027	-4.17405
WDR26	0.330707	3.39545	1.8336	0.083884	0.838027	-4.17453
ASB12	0.311697	2.40542	1.83298	0.0839807	0.838027	-4.17536
PPT1	0.298386	5.46351	1.83268	0.0840262	0.838029	-4.17575
IGKV3D-11	0.563678	6.33447	1.83129	0.0842431	0.838029	-4.17761
PPP4R1	0.390656	4.22959	1.83123	0.0842522	0.838029	-4.17769
USP53	0.308473	5.12611	1.83021	0.0844112	0.838029	-4.17905
MTCYBP29	0.288495	3.14362	1.8295	0.0845204	0.838029	-4.17999
IGHV3-33-2	0.298385	5.92466	1.82831	0.084707	0.838029	-4.18158
PBRM1	0.320329	6.47729	1.828	0.084755	0.838029	-4.18199
NOS2P3	0.315564	5.54313	1.82783	0.0847815	0.838029	-4.18222
BTNL10	0.368764	4.19888	1.82721	0.0848785	0.838029	-4.18304
RPS12P10	0.327545	3.10993	1.82698	0.0849145	0.838029	-4.18335
TCP11X3P	0.35858	2.84675	1.82657	0.0849787	0.838029	-4.1839
TADA2A	0.316424	3.09755	1.82647	0.0849941	0.838029	-4.18403
FAM149B1P1	0.308274	3.76285	1.82596	0.0850739	0.838029	-4.1847
TMEM99	0.337981	3.46437	1.82551	0.0851453	0.838029	-4.18531
PYGO1	0.320581	5.04963	1.82546	0.0851528	0.838029	-4.18537
MT1X	0.362975	5.83929	1.82528	0.0851817	0.838029	-4.18562
OR7E97P	0.290575	3.86198	1.8251	0.0852089	0.838029	-4.18585
HSP90B3P	0.304369	2.11925	1.82473	0.0852667	0.838029	-4.18634
CDC14B	0.376646	3.14885	1.82413	0.0853615	0.838029	-4.18714
IGFL4	0.311649	2.69133	1.82387	0.0854027	0.838029	-4.18749
CD96	0.471899	2.91515	1.82362	0.0854418	0.838029	-4.18782
RPS14P3	0.331028	5.6387	1.82352	0.0854573	0.838029	-4.18795
CSTA	0.335783	3.4209	1.8229	0.0855555	0.838029	-4.18878
GOLT1B	0.311266	5.83007	1.82255	0.0856107	0.838029	-4.18925
SLC13A5	0.289671	4.6611	1.82249	0.0856203	0.838029	-4.18933
PSMC1P5	0.309738	4.77324	1.8224	0.0856342	0.838029	-4.18944
KCNIP4	0.30532	2.58298	1.82155	0.0857685	0.8387	-4.19058
CERCAM	0.360817	4.62186	1.82055	0.0859266	0.839242	-4.19191
KANSL1	0.293211	6.87571	1.82046	0.0859402	0.839242	-4.19202
RASAL2	0.363896	4.85776	1.82004	0.0860071	0.83953	-4.19258
GAPDHP72	0.300967	4.64432	1.81812	0.086312	0.841124	-4.19514
RNF24	0.309986	4.18516	1.81778	0.0863659	0.841228	-4.19559
OR8D2	0.362542	2.26371	1.81729	0.0864428	0.841396	-4.19623
RPS3AP52	0.323439	2.26636	1.81671	0.0865357	0.841396	-4.197
MTRNR2L11	0.372306	2.76742	1.81639	0.0865867	0.841577	-4.19743
DYNC1H1	0.308237	3.0631	1.81558	0.0867148	0.842222	-4.19849
TWF1P1	0.459489	4.28873	1.81313	0.0871061	0.843921	-4.20174
C2orf66	0.299088	4.21627	1.81159	0.0873533	0.845116	-4.20378
IFNG	0.326795	2.15239	1.8112	0.0874158	0.845276	-4.2043
GREM1	0.447683	6.11963	1.80959	0.0876757	0.846154	-4.20644
TEF	0.373271	3.64354	1.8094	0.0877057	0.846154	-4.20669
CAPNS1P1	0.296745	4.49837	1.80925	0.0877304	0.846154	-4.20689
RBBP8P1	0.326555	2.11966	1.80842	0.0878641	0.847057	-4.20799
PLEKHA2	0.370645	4.64754	1.80745	0.0880199	0.847202	-4.20926
SNRPCP16	0.294162	1.91481	1.80734	0.0880381	0.847202	-4.20941
TRBV23OR9-2	0.294271	4.28571	1.80717	0.0880653	0.847202	-4.20964
SLC2A5	0.401207	4.7217	1.80696	0.0880995	0.847232	-4.20992
CNIH2	0.385867	3.28634	1.80547	0.0883411	0.848312	-4.21189
EIF4A1P8	0.311532	4.04194	1.8053	0.0883671	0.848312	-4.2121
SLC16A4	0.397873	5.41428	1.80457	0.0884863	0.84865	-4.21307
WWC1	0.283166	6.61719	1.80395	0.0885877	0.84865	-4.2139
PCBP3	0.503305	3.60181	1.80379	0.088613	0.84865	-4.2141
GCNT7	0.290597	1.90441	1.80319	0.08871	0.84865	-4.21489
GMFG	0.285573	5.82416	1.80279	0.0887753	0.84865	-4.21542
IGKV1OR-2	0.296919	5.97375	1.80153	0.0889801	0.849104	-4.21708
SDC2	0.358988	5.33429	1.80133	0.0890128	0.849104	-4.21735
UVRAG	0.354262	4.36332	1.80063	0.0891282	0.849104	-4.21828
TM6SF1	0.32591	4.12144	1.79908	0.0893808	0.849726	-4.22032
FAM89B	0.306815	5.41095	1.79899	0.0893964	0.849726	-4.22044
TRAV39	0.28945	2.46919	1.79807	0.0895471	0.850666	-4.22165
PRAMENP	0.303128	4.67651	1.79717	0.0896937	0.850997	-4.22283
REG4	0.311646	2.9342	1.79709	0.0897066	0.850997	-4.22293
MMP2	0.438396	6.32145	1.7968	0.0897544	0.851155	-4.22332
P2RY12	0.324438	2.33034	1.79647	0.0898094	0.851286	-4.22376
MCHR2	0.289603	3.22172	1.79605	0.0898779	0.851286	-4.22431
CYP2G1P	0.329768	3.9881	1.7959	0.0899025	0.851286	-4.22451
S100A16	0.305645	2.89742	1.7944	0.0901506	0.852686	-4.22649
MAF	0.32247	4.70604	1.79331	0.0903308	0.852792	-4.22792
RARA	0.353858	4.88001	1.79329	0.0903331	0.852792	-4.22794
ASAP3	0.356937	6.02346	1.79299	0.0903831	0.852969	-4.22834
APBB1IP	0.364896	4.55345	1.79191	0.0905616	0.853227	-4.22976
IGLV3-22	0.37199	3.96116	1.7918	0.0905798	0.853227	-4.2299
TCL1B	0.331965	2.35024	1.7915	0.0906292	0.853227	-4.2303
INE2	0.337327	2.82203	1.79029	0.0908306	0.853612	-4.23189
DDX3X	0.331622	3.39442	1.78994	0.090889	0.853612	-4.23235
NCALD	0.332026	4.27767	1.78835	0.0911521	0.853741	-4.23443
CCDC75P1	0.302707	3.38563	1.78796	0.0912171	0.853741	-4.23495
RHOBTB2	0.32896	5.40829	1.78772	0.0912576	0.853741	-4.23527
LCP1	0.399217	4.0572	1.78638	0.0914815	0.854516	-4.23703
ANXA2R	0.430138	5.63161	1.78594	0.0915555	0.854516	-4.23761
WDFY3-AS2	0.400513	4.51874	1.78579	0.0915799	0.854516	-4.2378
RFTN2	0.431261	3.01871	1.78484	0.0917384	0.854603	-4.23904
KRT17P2	0.305595	4.47852	1.78484	0.091739	0.854603	-4.23905
YWHAH	0.285889	7.53855	1.78329	0.0919986	0.854603	-4.24108
HNRNPA1P9	0.303635	2.3967	1.78311	0.0920296	0.854603	-4.24132
NPSR1-AS1	0.314772	3.38934	1.78286	0.0920719	0.854603	-4.24165
ISCA1P1	0.306681	5.36439	1.78264	0.0921078	0.854603	-4.24193
TCEA1P3	0.304977	2.38146	1.78242	0.0921453	0.854603	-4.24222
LRRC9	0.285878	1.58818	1.78236	0.0921558	0.854603	-4.2423
UBC	0.34757	6.35972	1.78156	0.0922894	0.854603	-4.24334
ZNF821	0.350706	2.96478	1.78117	0.092355	0.854603	-4.24386
TUBBP6	0.323749	2.61328	1.78031	0.0925013	0.854603	-4.24499
PKM	0.379229	5.51126	1.7799	0.0925696	0.854603	-4.24552
SMARCA5-AS1	0.36544	3.94394	1.77971	0.0926018	0.854603	-4.24577
CNNM3	0.354117	3.79863	1.77904	0.0927144	0.854603	-4.24664
FAM197Y7	0.33804	4.51879	1.77876	0.0927631	0.854603	-4.24702
ZNF304	0.403877	2.25606	1.77874	0.0927663	0.854603	-4.24705
TNPO1P1	0.330883	3.60923	1.77855	0.0927981	0.854603	-4.24729
SMG9	0.292524	6.20901	1.77844	0.0928163	0.854603	-4.24743
MAPKBP1	0.312298	5.67115	1.77756	0.092965	0.854603	-4.24858
PHC3	0.312032	4.95566	1.77754	0.092968	0.854603	-4.24861
CEL	0.329668	5.22658	1.77688	0.0930807	0.854603	-4.24948
KAT6A	0.292755	3.11513	1.77682	0.0930912	0.854603	-4.24956
RNF144A	0.350224	4.79371	1.77665	0.0931196	0.854603	-4.24978
NDN	0.315471	4.91906	1.77636	0.0931689	0.854603	-4.25016
ARHGEF15	0.403098	3.88455	1.7763	0.0931785	0.854603	-4.25023
SIRPD	0.320794	2.93151	1.77597	0.0932345	0.854603	-4.25066
OR5B17	0.348999	2.32765	1.77584	0.0932581	0.854603	-4.25084
FCGR3B	0.405131	4.32548	1.77439	0.0935044	0.854603	-4.25274
HACE1	0.347148	3.01452	1.7743	0.0935198	0.854603	-4.25285
ANKRD13A	0.428536	3.12622	1.77217	0.0938819	0.854767	-4.25563
ADAMTSL4	0.32653	4.83523	1.77115	0.0940578	0.854767	-4.25697
ITGB6	0.298467	3.55598	1.76978	0.0942919	0.854767	-4.25875
ATP6AP1L	0.315115	2.54776	1.76915	0.0944	0.854767	-4.25957
EGFLAM-AS2	0.311674	1.74165	1.76913	0.0944027	0.854767	-4.25959
PPP3CA	0.3631	5.19025	1.76911	0.0944075	0.854767	-4.25963
THSD4	0.350907	3.59396	1.76755	0.0946745	0.854824	-4.26166
SRP19	0.318416	4.54465	1.76755	0.0946755	0.854824	-4.26166
GAGE2D	0.282244	2.81775	1.76733	0.0947131	0.854824	-4.26195
GEM	0.315333	5.57989	1.76727	0.0947233	0.854824	-4.26203
DMWD	0.359016	4.37933	1.76606	0.0949313	0.854824	-4.2636
AQP9	0.367697	2.97592	1.76595	0.09495	0.854824	-4.26374
CATSPERB	0.360146	4.18819	1.76569	0.0949961	0.854824	-4.26409
TVP23A	0.329652	2.55891	1.76516	0.0950878	0.854824	-4.26478
ZNF460	0.341029	5.7398	1.76487	0.0951375	0.854824	-4.26515
NAV2-AS4	0.324077	3.5499	1.76427	0.095242	0.854824	-4.26594
BZW1P1	0.283155	2.67614	1.76418	0.0952565	0.854824	-4.26605
STIM2	0.359685	5.6663	1.76402	0.0952844	0.854824	-4.26626
OTOS	0.277203	4.24491	1.76392	0.0953011	0.854824	-4.26639
HEY2	0.322798	2.90811	1.76351	0.0953725	0.854824	-4.26692
SIGLEC12	0.285384	3.36078	1.76264	0.0955243	0.854824	-4.26806
TNPO2	0.346337	5.8662	1.76243	0.0955595	0.854824	-4.26833
ST13P15	0.345986	4.3986	1.76058	0.0958813	0.854824	-4.27073
PWRN3	0.338271	2.77207	1.76037	0.0959189	0.854824	-4.27102
HMGB3P22	0.398926	3.94771	1.76036	0.0959207	0.854824	-4.27103
LRP1	0.372583	6.53612	1.7603	0.0959312	0.854824	-4.27111
GNB1	0.384077	8.55319	1.76025	0.0959397	0.854824	-4.27117
NUP210L	0.300985	2.41061	1.76017	0.0959525	0.854824	-4.27127
IREB2	0.401319	3.07722	1.75992	0.0959967	0.854824	-4.2716
NUTF2P5	0.311697	4.12784	1.75978	0.0960203	0.854824	-4.27177
ELMO1	0.302335	4.46207	1.75952	0.0960659	0.854824	-4.27211
MTND4P21	0.290547	1.95162	1.75946	0.0960761	0.854824	-4.27219
C2CD2	0.368394	4.5772	1.75899	0.0961582	0.854824	-4.2728
STK10	0.435932	5.47099	1.75859	0.0962277	0.854824	-4.27332
FTH1P10	0.299782	8.49674	1.75842	0.0962577	0.854824	-4.27354
TGIF2P1	0.277971	4.39852	1.75824	0.0962888	0.854824	-4.27377
CACNA1C-IT2	0.359817	2.91292	1.75662	0.0965724	0.854824	-4.27588
MTF1	0.305863	4.11526	1.75552	0.0967651	0.854824	-4.27731
OR51A3P	0.311679	2.46736	1.7547	0.0969106	0.854824	-4.27838
PLGLA	0.287695	4.63656	1.75357	0.0971092	0.854824	-4.27985
OR51A9P	0.389116	4.12233	1.75335	0.0971474	0.854824	-4.28013
KCNA3	0.335953	3.92247	1.75294	0.0972199	0.854824	-4.28066
ANXA5	0.430227	3.8758	1.7528	0.0972449	0.854824	-4.28085
SIGLEC17P	0.296381	6.01703	1.75267	0.0972674	0.854824	-4.28101
UBE2Q2P5Y	0.287994	3.23786	1.752	0.0973849	0.854824	-4.28188
RAPGEF3	0.385229	3.16573	1.75106	0.0975503	0.854824	-4.28309
SCARNA15	0.285251	3.64481	1.75082	0.0975931	0.854824	-4.2834
IGHV3-74	0.329691	4.29166	1.74978	0.0977767	0.855335	-4.28475
PDE1A	0.298585	2.44323	1.74937	0.0978504	0.855466	-4.28529
KLF9	0.350951	5.78044	1.74862	0.0979825	0.856038	-4.28625
SOCS2	0.471262	3.51444	1.74842	0.0980185	0.856078	-4.28652
SLC30A4	0.319789	4.38672	1.74813	0.0980697	0.856116	-4.28689
SP2-AS1	0.275502	2.61198	1.74791	0.0981093	0.856116	-4.28718
OR5E1P	0.308418	2.63573	1.74713	0.0982479	0.856712	-4.28819
CCND2P1	0.307205	2.62477	1.74661	0.0983403	0.85697	-4.28886
CCDC7	0.348364	3.45888	1.74614	0.0984231	0.857145	-4.28946
NAV2-IT1	0.305305	2.21167	1.74586	0.0984731	0.857306	-4.28982
DEGS1	0.347709	2.76489	1.74494	0.0986385	0.857979	-4.29103
SCRG1	0.558441	2.43997	1.74489	0.098646	0.857979	-4.29108
PPP3CC	0.337767	4.72452	1.74368	0.0988627	0.857995	-4.29265
ELMO2P1	0.292631	3.50484	1.74354	0.0988873	0.857995	-4.29283
UBE2WP1	0.307436	2.53266	1.74322	0.0989449	0.857995	-4.29324
TACR1	0.328294	3.68262	1.74308	0.0989706	0.857995	-4.29343
CNTNAP2	0.365962	4.20686	1.74265	0.0990467	0.85801	-4.29398
DGKB	0.311852	1.79062	1.7416	0.0992345	0.85805	-4.29533
XGY1	0.35401	3.60558	1.74065	0.0994059	0.85805	-4.29656
CD99L2	0.325459	4.23593	1.73882	0.0997354	0.858952	-4.29893
ECM1	0.304118	4.17216	1.73857	0.0997801	0.858952	-4.29925
GNAO1	0.321173	4.41981	1.73806	0.0998716	0.858952	-4.2999
DKK3	0.330981	6.37862	1.73804	0.0998759	0.858952	-4.29993
IGKV1-13	0.311177	5.68635	1.73757	0.0999594	0.858952	-4.30053
COL6A2	0.288832	5.10936	1.73598	0.100247	0.859275	-4.30258
MTMR8	0.355141	3.3165	1.73564	0.10031	0.859319	-4.30303
RPS27P18	0.341669	2.91976	1.73502	0.100422	0.859344	-4.30383
HERC2P11	0.355073	3.66603	1.73493	0.100438	0.859344	-4.30394
UTP23	0.280633	3.64712	1.73426	0.100559	0.859359	-4.3048
IFNWP9	0.327193	4.56973	1.73386	0.100632	0.859359	-4.30532
TRAV15	0.294193	3.55231	1.73227	0.10092	0.860091	-4.30736
ZNF429	0.307375	4.43604	1.73211	0.100949	0.860091	-4.30757
FTH1P23	0.296795	6.37013	1.73206	0.100959	0.860091	-4.30764
RPL7P60	0.2961	2.64093	1.73196	0.100977	0.860091	-4.30776
CPNE5	0.379333	3.12828	1.73173	0.101019	0.860091	-4.30806
TAOK1	0.338877	6.46057	1.73141	0.101077	0.860091	-4.30847
S100A11	0.3084	7.93817	1.73088	0.101174	0.860091	-4.30915
ARL5AP3	0.380384	3.3422	1.73039	0.101263	0.860091	-4.30978
ATP8B4	0.279738	2.19002	1.73038	0.101265	0.860091	-4.30979
MTCO1P4	0.273854	2.36981	1.73012	0.101313	0.860091	-4.31013
VAV1	0.294762	5.25227	1.72917	0.101486	0.86038	-4.31135
JMJD7	0.307252	4.36064	1.72846	0.101616	0.86038	-4.31227
ZNF680	0.319195	6.12622	1.72845	0.101618	0.86038	-4.31228
PRR9	0.335324	2.99568	1.72821	0.101662	0.86038	-4.31259
TMEM42	0.303123	3.83989	1.7273	0.101829	0.860725	-4.31376
RBMS2	0.387296	6.2505	1.72647	0.101981	0.861402	-4.31482
UPF2	0.303572	3.74196	1.72607	0.102055	0.861402	-4.31534
OR10J4	0.293949	2.25293	1.72497	0.102257	0.861597	-4.31675
CITED2	0.326866	4.44157	1.72475	0.102296	0.861597	-4.31702
HSD3BP3	0.313764	1.96612	1.72464	0.102318	0.861597	-4.31717
CNN2P6	0.322072	4.40589	1.72453	0.102337	0.861597	-4.3173
PINLYP	0.284616	4.63427	1.72347	0.102532	0.862326	-4.31866
UTP14A	0.342496	3.33899	1.72335	0.102556	0.862326	-4.31883
PKMP5	0.312559	3.60437	1.72155	0.102888	0.863482	-4.32114
ADAMTS9-AS2	0.325528	4.31988	1.72144	0.102908	0.863482	-4.32127
TMEM185AP1	0.318188	6.21709	1.72133	0.102928	0.863482	-4.32141
ENO1-IT1	0.3311	4.2623	1.7212	0.102952	0.863482	-4.32157
TTC37	0.36073	3.01403	1.72104	0.102982	0.863482	-4.32178
POU2F2	0.286327	4.71643	1.72074	0.103038	0.863482	-4.32217
ZDBF2	0.465708	3.07205	1.72019	0.10314	0.863489	-4.32288
SMG8	0.3044	2.44866	1.71992	0.10319	0.863489	-4.32322
RAB43	0.276957	3.71664	1.71875	0.103407	0.863489	-4.32471
GTF2A1L	0.318432	2.62606	1.71825	0.1035	0.863489	-4.32536
SH3BGRL	0.286399	5.34113	1.71821	0.103508	0.863489	-4.32541
IL17RA	0.344954	3.81689	1.71775	0.103592	0.863489	-4.32599
VKORC1	0.337683	7.05513	1.71667	0.103793	0.863985	-4.32737
OR4C2P	0.27008	2.07903	1.71664	0.1038	0.863985	-4.32742
PROCR	0.366083	4.19789	1.71647	0.103832	0.863985	-4.32764
SVEP1	0.330359	4.59042	1.71622	0.103879	0.863985	-4.32796
PTPN7	0.289602	3.74071	1.71612	0.103897	0.863985	-4.32808
SHISA4	0.322482	4.06838	1.71582	0.103953	0.863985	-4.32847
BHLHE40-AS1	0.302455	3.30054	1.71563	0.103988	0.863985	-4.32871
EN1	0.325912	4.33226	1.7148	0.104143	0.863985	-4.32977
UBTD2	0.306231	4.70769	1.71474	0.104154	0.863985	-4.32984
STEAP4	0.50352	5.4063	1.71396	0.1043	0.863985	-4.33084
IGLV9-49	0.308947	5.65244	1.7139	0.104311	0.863985	-4.33092
CR1	0.35414	2.6488	1.71378	0.104335	0.863985	-4.33108
HERC2P10	0.321497	3.65113	1.71349	0.104389	0.864115	-4.33145
ST8SIA2	0.305076	2.8236	1.71151	0.104759	0.865274	-4.33397
MTCO1P17	0.281876	2.25968	1.71138	0.104785	0.865274	-4.33414
PJA2	0.321107	6.23076	1.70902	0.105229	0.866915	-4.33715
IGKV1D-12	0.357505	6.24469	1.70841	0.105345	0.867325	-4.33793
WHAMMP2	0.306225	4.93689	1.70792	0.105437	0.867325	-4.33856
CT45A5	0.334599	1.9181	1.70728	0.105557	0.868047	-4.33936
OR6F1	0.295122	3.27673	1.70666	0.105675	0.868302	-4.34016
WBP1LP6	0.330817	4.17253	1.70614	0.105774	0.86848	-4.34083
CHRDL1	0.583202	4.50242	1.70583	0.105832	0.86848	-4.34122
OR7E136P	0.284477	3.81281	1.7049	0.106008	0.868811	-4.3424
PLCXD3	0.302775	2.76655	1.70478	0.106032	0.868811	-4.34256
KIFC2	0.299057	4.66351	1.704	0.106179	0.869198	-4.34354
PIGC	0.291458	4.10505	1.70386	0.106206	0.869198	-4.34373
ZNF154	0.298444	2.63015	1.70348	0.106279	0.869529	-4.34421
RAB1B	0.287991	5.09173	1.70187	0.106586	0.870823	-4.34626
CYP2D8P	0.372058	3.33065	1.70176	0.106607	0.870823	-4.34641
DYNC2H1	0.325195	3.32946	1.70083	0.106784	0.870823	-4.34758
HSPB8	0.317957	4.81041	1.70067	0.106814	0.870823	-4.34778
DSEL	0.350055	2.83782	1.70052	0.106843	0.870823	-4.34797
DPP3P1	0.360481	2.99627	1.70038	0.106871	0.870823	-4.34816
STX8P1	0.30458	2.6614	1.69908	0.107119	0.870823	-4.34981
ZNF587	0.374454	4.77861	1.69895	0.107144	0.870823	-4.34997
EXOC8	0.310812	3.27954	1.69808	0.107311	0.870823	-4.35108
TMEM163	0.281521	3.88023	1.698	0.107326	0.870823	-4.35118
EVADR	0.403179	4.09028	1.6976	0.107403	0.870823	-4.35169
NDUFB4P9	0.34067	2.20482	1.69749	0.107424	0.870823	-4.35183
OR8G1	0.310474	3.12685	1.69698	0.107522	0.870823	-4.35248
KCNE2	0.2908	2.37006	1.6966	0.107595	0.870823	-4.35296
TAF9P3	0.39159	3.23043	1.69613	0.107686	0.870823	-4.35355
ACBD7	0.302058	2.16635	1.69579	0.10775	0.870823	-4.35398
MS4A7	0.338412	3.80871	1.69565	0.107778	0.870823	-4.35417
FAM126B	0.33158	6.32387	1.69543	0.107821	0.870823	-4.35444
AMN1	0.321235	2.22283	1.69505	0.107893	0.870823	-4.35492
ARL2BPP4	0.363253	2.15939	1.69498	0.107906	0.870823	-4.35501
C10orf71	0.29482	2.78803	1.69434	0.10803	0.870823	-4.35582
RNF181	0.295534	3.40308	1.69417	0.108063	0.870823	-4.35604
ZNF331	0.362406	3.59755	1.69319	0.108252	0.871333	-4.35728
DLG4	0.41136	4.03513	1.69298	0.108292	0.871333	-4.35754
KRT18P37	0.311193	5.2003	1.69296	0.108298	0.871333	-4.35758
RBP4	0.354943	3.18887	1.69284	0.10832	0.871333	-4.35773
NEUROG1	0.351549	2.6576	1.69269	0.10835	0.871333	-4.35792
XG	0.38127	3.42839	1.69243	0.108399	0.871334	-4.35824
NYAP2	0.2664	2.73789	1.69125	0.108628	0.87218	-4.35974
SLAIN2	0.350048	5.31988	1.69055	0.108764	0.87218	-4.36062
TVP23BP1	0.346327	3.91671	1.69004	0.108862	0.87218	-4.36127
STX7	0.300674	5.67838	1.69	0.108871	0.87218	-4.36132
WBP1L	0.345459	5.9299	1.6896	0.108949	0.872181	-4.36183
FLJ31356	0.281627	3.71647	1.68926	0.109015	0.872181	-4.36226
ZNF516	0.296371	4.81518	1.68919	0.109028	0.872181	-4.36234
MTND5P14	0.370056	4.76904	1.68876	0.109111	0.872181	-4.36289
NACAP5	0.294837	2.93067	1.68865	0.109134	0.872181	-4.36304
TTTY16	0.273907	3.53837	1.68824	0.109213	0.872181	-4.36355
GM2AP2	0.305886	2.24922	1.68772	0.109314	0.872181	-4.36421
RPL7AP57	0.288921	2.10426	1.68764	0.10933	0.872181	-4.36431
ZNF773	0.302406	3.66389	1.68655	0.109544	0.872181	-4.36569
FTL	0.312663	9.18557	1.68633	0.109585	0.872181	-4.36596
IDS	0.283004	6.40208	1.68623	0.109606	0.872181	-4.36609
HBE1	0.309694	4.89155	1.6846	0.109924	0.872712	-4.36815
NAIP	0.344432	3.66967	1.68409	0.110024	0.872712	-4.36879
LYVE1	0.331976	4.96264	1.68367	0.110106	0.87311	-4.36932
SGCA	0.309604	4.59629	1.68213	0.110409	0.873183	-4.37127
NKX3-2	0.311784	4.36064	1.68213	0.11041	0.873183	-4.37127
APOA4	0.288287	5.61195	1.68132	0.110569	0.873231	-4.37229
ZNF101P1	0.300725	2.76122	1.68132	0.110569	0.873231	-4.3723
GLCCI1	0.374217	3.57436	1.68031	0.110768	0.873473	-4.37357
IGFBP7	0.358214	5.78718	1.6792	0.110987	0.873473	-4.37497
CRYBG3	0.332152	3.51154	1.6789	0.111046	0.873473	-4.37534
RPP40P2	0.291386	2.46179	1.6781	0.111204	0.873473	-4.37635
HLA-H	0.290844	5.14599	1.67801	0.111222	0.873473	-4.37647
CD99P1	0.302473	7.34981	1.67782	0.11126	0.873473	-4.37671
CDC42P1	0.297175	5.02594	1.67758	0.111308	0.873473	-4.37701
HDGFP1	0.27815	5.31786	1.67742	0.111339	0.873473	-4.37721
ZNF90P1	0.280622	2.21171	1.6762	0.11158	0.873473	-4.37874
CECR3	0.280014	4.64823	1.67568	0.111684	0.873536	-4.3794
ABHD14A	0.290794	4.00448	1.67536	0.111748	0.873536	-4.37981
TNRC6B	0.318424	5.42449	1.67514	0.111792	0.873536	-4.38008
S1PR1	0.297844	4.15657	1.67486	0.111846	0.873633	-4.38043
SLC7A8	0.290763	6.9706	1.67352	0.112113	0.873801	-4.38211
EFCAB14	0.376941	5.1616	1.67282	0.112253	0.873801	-4.383
HNRNPCL3	0.293222	3.79692	1.67195	0.112427	0.873801	-4.3841
RSPH10B2	0.29193	4.14351	1.67152	0.112513	0.873801	-4.38464
IGKV1-37	0.368911	4.76597	1.67142	0.112533	0.873801	-4.38476
GLRB	0.266612	3.77444	1.67104	0.112609	0.873801	-4.38524
OR2AI1P	0.310982	3.72118	1.67085	0.112646	0.873801	-4.38547
FAM227B	0.27674	2.55082	1.66998	0.11282	0.873801	-4.38657
MAP4	0.376984	5.94247	1.66875	0.113068	0.873801	-4.38811
UGDH-AS1	0.277318	5.69762	1.66855	0.113107	0.873801	-4.38836
RBBP5	0.291214	4.5349	1.66765	0.113289	0.873801	-4.3895
USP9YP30	0.344973	1.90019	1.6673	0.113359	0.873801	-4.38993
CMTM1	0.279743	4.08515	1.6668	0.113459	0.873801	-4.39056
PKMP4	0.304872	5.73886	1.66652	0.113515	0.873801	-4.39091
SNORD59B	0.31378	2.03412	1.66647	0.113527	0.873801	-4.39098
BLZF1	0.404785	4.08129	1.66635	0.113549	0.873801	-4.39112
PGM3	0.287245	3.3214	1.66631	0.113558	0.873801	-4.39117
ERCC3	0.32	5.56748	1.66573	0.113674	0.873801	-4.3919
TNFRSF17	0.33541	2.07855	1.66552	0.113716	0.873801	-4.39216
ACE3P	0.280491	3.60753	1.66472	0.113878	0.873801	-4.39317
IFNGR2	0.330003	6.65781	1.66439	0.113945	0.873801	-4.39358
ZNF165	0.342939	2.3308	1.66412	0.114	0.873801	-4.39392
CLIC4P3	0.273908	4.8198	1.66357	0.114111	0.873801	-4.39461
MAP9	0.274197	1.78862	1.66353	0.11412	0.873801	-4.39466
OR13E1P	0.306724	3.07597	1.66227	0.114374	0.874054	-4.39623
FLNA	0.328003	6.94036	1.66215	0.114399	0.874054	-4.39639
RIMKLB	0.285602	5.09352	1.66205	0.114419	0.874054	-4.39651
SMARCA1	0.309281	4.47864	1.66184	0.114461	0.874073	-4.39677
RBPMS2	0.325826	4.50952	1.66052	0.11473	0.874704	-4.39843
COX6CP14	0.284767	4.06529	1.66049	0.114736	0.874704	-4.39847
RPL7AP14	0.327297	5.03277	1.6604	0.114754	0.874704	-4.39858
AMZ2P2	0.324464	2.55314	1.65982	0.114872	0.874784	-4.3993
PBOV1	0.38114	2.08545	1.65918	0.115002	0.874918	-4.40011
IRX1P1	0.275319	3.6462	1.65898	0.115042	0.874918	-4.40035
EXTL2	0.288205	1.89827	1.65658	0.115532	0.876612	-4.40335
DHRSX	0.353592	5.75235	1.65631	0.115588	0.876612	-4.40369
OSGEPL1-AS1	0.301506	3.20953	1.65446	0.115966	0.876755	-4.406
VEGFB	0.282792	8.33312	1.65436	0.115987	0.876755	-4.40612
ADAM3B	0.268878	4.36009	1.65368	0.116127	0.876755	-4.40697
ACTG1P14	0.278194	4.27566	1.65364	0.116136	0.876755	-4.40703
ASPRV1	0.385823	3.17658	1.65339	0.116187	0.876755	-4.40734
NXPE2P1	0.272406	2.22608	1.65326	0.116214	0.876755	-4.4075
CYP4F29P	0.309306	3.44448	1.6532	0.116226	0.876755	-4.40758
C17orf97	0.293306	5.13366	1.65263	0.116343	0.876755	-4.40829
SRP72P2	0.291485	5.93711	1.65119	0.116638	0.876755	-4.41007
MAGEL2	0.307884	4.242	1.6511	0.116658	0.876755	-4.41019
FLOT1	0.323025	3.99086	1.64993	0.1169	0.876755	-4.41165
NPM1P27	0.320925	3.19803	1.64951	0.116986	0.876755	-4.41217
RNFT1	0.307353	1.88498	1.64951	0.116986	0.876755	-4.41217
SURF1	0.324171	4.68452	1.64931	0.117028	0.876755	-4.41242
IGHV3-63	0.359345	3.02597	1.64927	0.117035	0.876755	-4.41247
FTH1	0.31911	7.53567	1.64911	0.117069	0.876755	-4.41267
UBTFL9	0.299012	1.86422	1.64897	0.117097	0.876755	-4.41284
PRELID3BP5	0.295119	2.60592	1.64896	0.1171	0.876755	-4.41286
PHC1	0.300085	3.45312	1.64825	0.117246	0.876755	-4.41374
RASSF2	0.365403	4.34175	1.648	0.117299	0.876755	-4.41406
IGLV1-50	0.320687	5.48907	1.64795	0.117309	0.876755	-4.41412
IGKV1D-39	0.506747	6.39741	1.64793	0.117313	0.876755	-4.41414
DNAL1	0.286533	1.97343	1.64791	0.117317	0.876755	-4.41416
ARL5C	0.263196	2.46888	1.6478	0.117339	0.876755	-4.4143
COL5A1	0.350839	5.04114	1.64775	0.11735	0.876755	-4.41436
RPS17P14	0.326099	4.94787	1.6476	0.11738	0.876755	-4.41454
TTC39A-AS1	0.301971	4.35491	1.6474	0.117423	0.876755	-4.4148
UBR1	0.333423	6.26167	1.6471	0.117484	0.876755	-4.41517
OR2T7	0.353451	3.55416	1.64686	0.117534	0.876755	-4.41547
FAAP24	0.320312	4.37984	1.64686	0.117534	0.876755	-4.41547
KRTAP9-2	0.277966	4.15986	1.64582	0.11775	0.877184	-4.41676
ZNF385D-AS1	0.350635	2.18872	1.64561	0.117795	0.877184	-4.41703
PDHA1P1	0.286761	2.06075	1.64499	0.117923	0.877253	-4.4178
NCCRP1	0.309037	4.3099	1.64476	0.117971	0.877253	-4.41808
CHP1	0.309715	6.49855	1.6435	0.118232	0.877833	-4.41964
MED12L	0.267648	2.0392	1.643	0.118337	0.877833	-4.42027
DDX19A	0.265619	5.87633	1.6423	0.118483	0.877833	-4.42113
NTRK2	0.294868	2.65703	1.64186	0.118576	0.878046	-4.42168
MTND5P5	0.291038	2.9154	1.64135	0.118682	0.878197	-4.42232
BBIP1	0.269628	6.40197	1.64119	0.118715	0.878197	-4.42251
NRSN1	0.292858	3.0096	1.64041	0.118878	0.878513	-4.42348
SEMA3E	0.2831	2.69771	1.64033	0.118896	0.878513	-4.42359
LIN28AP1	0.254645	5.72626	1.63987	0.118991	0.878978	-4.42415
NPM1P38	0.266425	2.97332	1.6388	0.119216	0.879337	-4.42548
OR2J2	0.295947	2.78591	1.63805	0.119375	0.879434	-4.42642
CLNK	0.27685	2.52164	1.63786	0.119415	0.879487	-4.42665
MOCS2	0.351114	3.19323	1.6377	0.119447	0.87949	-4.42684
PCDH8P1	0.336366	2.23343	1.63739	0.119512	0.879534	-4.42722
MAP7D3	0.384212	4.22468	1.63659	0.119683	0.879534	-4.42823
IGHV7-56	0.312526	4.07267	1.63635	0.119733	0.879534	-4.42852
ADHFE1	0.439644	3.4965	1.63597	0.119812	0.879534	-4.42898
OR1S1	0.298232	2.52962	1.6359	0.119827	0.879534	-4.42908
ACTG1P2	0.267508	3.51132	1.6356	0.11989	0.879534	-4.42945
BRD7P3	0.26603	1.73523	1.63532	0.119948	0.879534	-4.42979
POLR2J4	0.262751	3.97478	1.63474	0.120071	0.879534	-4.43051
CRPP1	0.288928	4.48441	1.63302	0.120437	0.879534	-4.43264
SNORD31	0.302401	2.76091	1.63296	0.120449	0.879534	-4.43272
ANKRD36BP1	0.283345	4.41266	1.63239	0.120569	0.879534	-4.43342
FBXO39	0.283008	4.26843	1.63225	0.120599	0.879534	-4.43359
TBC1D23	0.336621	3.53088	1.63213	0.120625	0.879534	-4.43375
PCDHGC3	0.333078	3.0895	1.63122	0.120817	0.879534	-4.43486
MTCYBP23	0.351161	2.1826	1.63087	0.120892	0.879534	-4.4353
TRAJ45	0.453097	3.6935	1.63067	0.120935	0.879534	-4.43555
DDX39A	0.29402	4.75223	1.63048	0.120975	0.879534	-4.43578
BMP8B	0.311497	3.23162	1.63037	0.120998	0.879534	-4.43591
FAT4	0.337673	5.57077	1.63018	0.121039	0.879534	-4.43615
HCG24	0.30676	2.88359	1.63012	0.121051	0.879534	-4.43622
ATP6V1D	0.381275	2.58183	1.62955	0.121172	0.87962	-4.43693
ZBTB25	0.330297	4.52414	1.62859	0.121377	0.880351	-4.43811
EXTL2P1	0.293656	3.16256	1.62847	0.121402	0.880351	-4.43826
IGKV1D-16	0.323566	5.00693	1.62737	0.121638	0.88163	-4.43962
PRAMEF14	0.339308	2.57431	1.62662	0.121797	0.882278	-4.44054
TBX19	0.261061	2.79951	1.62526	0.12209	0.882304	-4.44223
PTGDR	0.280445	3.50126	1.62487	0.122172	0.882304	-4.4427
ANXA1	0.478765	5.14496	1.62447	0.122259	0.882304	-4.4432
GORAB	0.327844	2.9681	1.62415	0.122327	0.882304	-4.44359
C14orf180	0.256489	5.6344	1.62409	0.122339	0.882304	-4.44366
HMGN1P30	0.262933	7.48021	1.62353	0.12246	0.882304	-4.44436
RMDN2-AS1	0.334194	2.1949	1.62285	0.122607	0.882942	-4.4452
DEPDC5	0.331959	4.26272	1.62093	0.123019	0.883056	-4.44755
KATNBL1P3	0.278879	2.36639	1.6207	0.123069	0.883056	-4.44784
ATP13A2	0.40992	3.57022	1.61994	0.123234	0.883501	-4.44877
SLC14A2-AS1	0.301672	1.96899	1.61909	0.123417	0.883501	-4.44982
DPPA5P1	0.271527	4.74728	1.61883	0.123474	0.883644	-4.45014
DOCK11P1	0.292321	3.53496	1.61829	0.123591	0.88378	-4.4508
ZNF734P	0.255151	2.96367	1.61689	0.123895	0.884369	-4.45253
PAGE2	0.28089	2.90232	1.61665	0.123945	0.884369	-4.45281
ASB17	0.289859	2.09425	1.61656	0.123965	0.884369	-4.45292
LINS1	0.298947	2.19448	1.61624	0.124036	0.884648	-4.45333
ATG9A	0.316959	4.01373	1.61604	0.124078	0.884718	-4.45357
MSRA	0.312503	4.05413	1.61479	0.124351	0.885488	-4.4551
ZHX1	0.311534	5.06601	1.6145	0.124413	0.885488	-4.45546
EDARADD	0.369877	2.76259	1.61194	0.124973	0.88777	-4.4586
LAX1	0.690405	5.53037	1.61126	0.125121	0.88777	-4.45943
KCNC2	0.336555	2.31046	1.6112	0.125134	0.88777	-4.45951
IGHV2-70	0.542132	5.18278	1.61103	0.12517	0.88777	-4.45971
LAIR1	0.315866	3.81156	1.60992	0.125414	0.888056	-4.46107
BTLA	0.286409	1.93538	1.60956	0.125492	0.888056	-4.46151
RAMP2	0.274561	4.63141	1.60944	0.12552	0.888056	-4.46166
MAPK6	0.290625	4.75786	1.60937	0.125534	0.888056	-4.46174
FAT1	0.329982	6.1723	1.60917	0.125578	0.888056	-4.46199
PIGFP2	0.295543	2.47316	1.60873	0.125676	0.888056	-4.46254
PRRT3	0.313033	3.09374	1.60808	0.125817	0.888056	-4.46332
ERCC6L2	0.331123	3.02489	1.60786	0.125866	0.888056	-4.46359
AP5B1	0.29198	3.59525	1.60752	0.125941	0.888056	-4.46401
RSU1P3	0.328729	5.20411	1.60746	0.125955	0.888056	-4.46409
PPP2R5A	0.389233	5.20734	1.60737	0.125973	0.888056	-4.46419
ZEB2	0.300698	5.2387	1.60735	0.125978	0.888056	-4.46421
POM121L6P	0.264424	3.76406	1.60683	0.126094	0.888645	-4.46486
UBE2G1	0.347456	5.21967	1.60593	0.126292	0.888739	-4.46596
RBM41	0.280515	4.00911	1.60585	0.126308	0.888739	-4.46605
TRAF3	0.264421	3.98013	1.60515	0.126463	0.888755	-4.46691
OR7E39P	0.265462	2.86694	1.60508	0.12648	0.888755	-4.467
TMCC1P1	0.277565	3.11615	1.60471	0.12656	0.888755	-4.46744
IGKV1OR-3	0.314063	6.40206	1.60454	0.126598	0.888755	-4.46765
MTRF1LP2	0.274355	2.96323	1.6044	0.126629	0.888755	-4.46783
ADAM32	0.257405	1.66192	1.60421	0.126671	0.888811	-4.46806
ALKBH3	0.265155	3.90158	1.60353	0.126822	0.888832	-4.46889
OR4M1	0.286788	1.72325	1.60345	0.12684	0.888832	-4.46899
TNS3	0.43619	5.2833	1.60312	0.126912	0.888832	-4.46939
ZNF417	0.28759	5.40805	1.60275	0.126995	0.888832	-4.46984
ZNF730	0.298014	3.15918	1.60261	0.127025	0.888832	-4.47001
SPOCK1	0.284197	5.50319	1.60257	0.127034	0.888832	-4.47006
MICU3	0.282942	1.87294	1.60235	0.127083	0.888832	-4.47033
SLC2A3	0.319908	5.17203	1.60051	0.127491	0.890014	-4.47257
RERG-AS1	0.300942	4.39889	1.59948	0.127721	0.890462	-4.47383
LIN28A	0.262842	4.11063	1.59918	0.127787	0.890462	-4.47419
LIN52	0.390859	4.22513	1.59884	0.127864	0.890776	-4.47462
UBE2F	0.40332	5.98405	1.59775	0.128107	0.890918	-4.47594
CT45A9	0.338282	1.82033	1.59751	0.12816	0.890918	-4.47623
CT45A8	0.338282	1.82033	1.59751	0.12816	0.890918	-4.47623
CYLD	0.279823	7.7721	1.59743	0.128178	0.890918	-4.47633
SLC7A6	0.320369	7.43566	1.59724	0.12822	0.890983	-4.47656
SULT6B1	0.286866	2.30111	1.59642	0.128403	0.891359	-4.47756
SOCS5	0.288378	3.93025	1.59627	0.128438	0.891359	-4.47775
FAM107B	0.276675	7.60009	1.59547	0.128617	0.891764	-4.47872
SRP72P1	0.292367	2.70707	1.59512	0.128696	0.891764	-4.47915
PGM5-AS1	0.268846	4.14341	1.59494	0.128736	0.891764	-4.47937
SNORD114-22	0.458168	3.8477	1.59472	0.128785	0.891764	-4.47963
TK2	0.301744	3.70935	1.5941	0.128923	0.891913	-4.48038
TRIO	0.294599	4.38506	1.59402	0.128942	0.891913	-4.48049
UBE2V1P1	0.329203	7.66027	1.59274	0.129229	0.893215	-4.48204
DHX33	0.288445	3.87905	1.5925	0.129284	0.89325	-4.48233
LRRC15	0.275866	5.78577	1.59243	0.129299	0.89325	-4.48242
LIPT2	0.257527	4.17114	1.59153	0.1295	0.893796	-4.4835
SYNE4	0.293849	3.86972	1.59125	0.129565	0.893796	-4.48385
MKRN2	0.281807	3.03748	1.59089	0.129645	0.893796	-4.48428
RPL7P39	0.321706	2.85451	1.59081	0.129663	0.893796	-4.48438
PSMC1P4	0.293983	2.35927	1.58984	0.129883	0.893796	-4.48557
RIMBP2	0.251882	4.70828	1.58934	0.129995	0.893796	-4.48617
ARRB2	0.275022	6.9537	1.5891	0.130048	0.893796	-4.48645
TCF23	0.313546	4.16681	1.58833	0.130224	0.893796	-4.48739
RPL18AP14	0.299579	4.3672	1.58808	0.13028	0.893796	-4.4877
PDCD4	0.32502	2.67808	1.5879	0.130322	0.893796	-4.48792
STEAP2-AS1	0.263666	4.00084	1.58683	0.130563	0.893796	-4.48921
STRIP1	0.351678	4.62647	1.58674	0.130585	0.893796	-4.48933
TMEM178B	0.263832	3.89765	1.58672	0.130588	0.893796	-4.48935
CLCN7	0.30005	3.70783	1.58584	0.130789	0.893796	-4.49042
AGGF1P4	0.272845	3.88002	1.5844	0.131116	0.893796	-4.49216
CRTAP	0.276364	5.74007	1.58417	0.131167	0.893796	-4.49243
ANP32AP1	0.292426	2.65456	1.58405	0.131196	0.893796	-4.49258
HDAC1P2	0.342458	3.12144	1.58388	0.131235	0.893796	-4.49279
CICP9	0.274177	5.57486	1.58346	0.131331	0.893796	-4.4933
OR8K3	0.258881	1.98007	1.58327	0.131373	0.893796	-4.49353
DDN	0.277235	4.27974	1.58278	0.131485	0.893796	-4.49412
DUX4L47	0.285962	4.26146	1.58268	0.131507	0.893796	-4.49424
ATXN1L	0.272588	5.31858	1.58261	0.131523	0.893796	-4.49432
BNIP3	0.269651	6.06259	1.58159	0.131756	0.893796	-4.49555
METTL21EP	0.259339	2.20991	1.58146	0.131786	0.893796	-4.49572
ADAM1B	0.283667	2.17579	1.58103	0.131884	0.893796	-4.49623
YIPF3	0.275195	5.217	1.58096	0.1319	0.893796	-4.49632
SLC19A2	0.303156	2.76026	1.58091	0.131911	0.893796	-4.49638
VPREB3	0.302332	4.60257	1.58091	0.131912	0.893796	-4.49638
EIF3EP1	0.26132	4.51908	1.58041	0.132027	0.893796	-4.49699
TOM1L2	0.280449	4.85157	1.58025	0.132063	0.893796	-4.49718
ENG	0.380019	4.18073	1.58014	0.132089	0.893796	-4.49731
IGKV6D-21	0.559554	4.07328	1.58005	0.132109	0.893796	-4.49742
TMEM106B	0.264229	3.97232	1.57993	0.132137	0.893796	-4.49757
PLAUR	0.429372	4.49682	1.57928	0.132285	0.893796	-4.49835
HMGB1P23	0.273579	5.66256	1.57919	0.132306	0.893796	-4.49846
NT5C3B	0.342371	6.67302	1.57906	0.132336	0.893796	-4.49862
MYH11	0.413639	5.2271	1.57891	0.132371	0.893796	-4.4988
BST1	0.315857	3.90782	1.57843	0.132482	0.893796	-4.49938
HAS3	0.281042	3.02131	1.578	0.132579	0.893796	-4.4999
MYH15	0.282232	2.78988	1.57799	0.132582	0.893796	-4.49991
FAM135B	0.298086	2.71882	1.57748	0.132698	0.893796	-4.50052
RPS4Y1	0.270628	4.73569	1.57738	0.132722	0.893796	-4.50065
PRNCR1	0.278296	3.34826	1.57727	0.132747	0.893796	-4.50078
SLC2A1-AS1	0.307278	3.10043	1.57687	0.132839	0.893796	-4.50126
CATIP-AS1	0.269457	5.10347	1.576	0.133041	0.893796	-4.50232
HCAR1	0.300635	3.16633	1.57598	0.133043	0.893796	-4.50233
WHAMMP1	0.266253	2.25213	1.57592	0.133058	0.893796	-4.50241
PPP1R14C	0.357949	3.1383	1.57554	0.133145	0.893796	-4.50286
IGKV2-38	0.287065	4.67984	1.57509	0.133249	0.893796	-4.50341
COL17A1	0.268441	6.26148	1.57502	0.133265	0.893796	-4.50349
PPP2R3A	0.282321	2.33668	1.57444	0.133399	0.893796	-4.50419
CHST9	0.283529	2.26729	1.5742	0.133455	0.893796	-4.50448
GOLGA2P2Y	0.294672	4.21635	1.57391	0.133522	0.893796	-4.50484
ZNF510	0.345229	2.60174	1.57375	0.133559	0.893796	-4.50503
C21orf62	0.356326	3.57995	1.57334	0.133654	0.893796	-4.50552
CUZD1	0.280382	2.41173	1.5732	0.133685	0.893796	-4.50568
NAP1L3	0.32748	2.90309	1.57257	0.133832	0.893796	-4.50645
FTH1P16	0.263193	7.59277	1.57245	0.133859	0.893796	-4.50659
CFAP58	0.316015	3.23374	1.57223	0.133911	0.893796	-4.50686
RAP1A	0.277016	5.0093	1.57163	0.134051	0.893942	-4.50759
FBXO45	0.326466	2.84753	1.56976	0.134483	0.893942	-4.50983
PAM	0.348666	5.6277	1.5697	0.134499	0.893942	-4.50991
RYR2	0.317769	2.62809	1.56939	0.134571	0.893942	-4.51028
ZFAND5	0.336193	6.76872	1.56932	0.134586	0.893942	-4.51036
R3HDM2	0.278832	5.54086	1.56876	0.134716	0.893942	-4.51103
AKAP8	0.256301	4.7697	1.56865	0.134742	0.893942	-4.51117
RASA4B	0.2792	4.69915	1.56822	0.134843	0.893942	-4.51169
FOXI3	0.321184	3.21626	1.56802	0.13489	0.893942	-4.51193
DOCK10	0.270028	2.30514	1.56776	0.13495	0.893942	-4.51223
MTERF4	0.271326	3.81611	1.56747	0.135017	0.893942	-4.51258
SPANXA2-OT1	0.303191	4.08573	1.56732	0.135053	0.893942	-4.51277
SPI1	0.32784	5.93872	1.56704	0.135118	0.893942	-4.5131
LCMT1-AS2	0.253715	4.95278	1.56701	0.135126	0.893942	-4.51314
CRYGS	0.301668	3.13906	1.56698	0.135132	0.893942	-4.51318
IGHV4-55	0.367662	5.42828	1.56655	0.135233	0.893942	-4.51369
NDUFA5P10	0.295811	2.688	1.56634	0.13528	0.893942	-4.51394
MDFIC	0.316146	6.72435	1.56556	0.135463	0.893942	-4.51488
CNR1	0.344196	5.75932	1.56549	0.135481	0.893942	-4.51497
TRBV2	0.28158	2.46651	1.56535	0.135514	0.893942	-4.51514
TMEM200A	0.374639	4.00979	1.56493	0.13561	0.893942	-4.51563
HECTD2-AS1	0.274877	3.12915	1.5649	0.135617	0.893942	-4.51567
BDH2	0.30119	3.09736	1.56368	0.135905	0.894421	-4.51714
CD300LG	0.282858	4.99865	1.5636	0.135922	0.894421	-4.51723
DYRK3	0.358844	3.99097	1.56319	0.136019	0.89461	-4.51772
ZSWIM5P2	0.275546	3.95063	1.56294	0.136078	0.89461	-4.51802
LASP1	0.272013	6.82119	1.56292	0.136082	0.89461	-4.51805
LTBP2	0.298971	5.32863	1.56124	0.136479	0.895161	-4.52007
ZNF837	0.2722	4.08968	1.561	0.136533	0.895161	-4.52035
TRAM2	0.334949	5.11777	1.56093	0.136551	0.895161	-4.52044
CHCHD6	0.310596	3.26602	1.56056	0.136639	0.895236	-4.52088
IGHV3-30-2	0.248234	5.89241	1.56025	0.136712	0.895236	-4.52126
CDY12P	0.308839	3.20116	1.56004	0.136761	0.895236	-4.5215
GNG10	0.269738	5.54006	1.55993	0.136787	0.895236	-4.52164
CCDC144NL-AS1	0.352522	3.39931	1.55987	0.1368	0.895236	-4.5217
ATP6V0CP3	0.273587	5.34729	1.55951	0.136885	0.895262	-4.52213
HMGN1P16	0.299057	2.03237	1.55938	0.136916	0.895262	-4.52229
FNBP1	0.356399	5.93546	1.55849	0.137127	0.895705	-4.52336
OR7M1P	0.376399	2.39349	1.55776	0.137299	0.895705	-4.52423
PPFIA2	0.322899	5.75362	1.55772	0.137309	0.895705	-4.52428
CACNA1C-IT3	0.295694	5.73714	1.55688	0.137508	0.895705	-4.52528
TUG1	0.288848	5.30395	1.55648	0.137603	0.895705	-4.52577
GNAI3	0.298902	5.11049	1.5563	0.137645	0.895705	-4.52598
RASGRP1	0.313891	2.17572	1.55609	0.137696	0.895705	-4.52623
PLXNC1	0.316621	3.88384	1.55586	0.13775	0.895705	-4.52651
FUBP3	0.269974	5.0781	1.55583	0.137755	0.895705	-4.52653
ZNF189	0.326205	4.22592	1.55575	0.137776	0.895705	-4.52664
SUB1P2	0.268935	3.34681	1.55549	0.137836	0.895705	-4.52694
XBP1	0.288063	6.47889	1.5542	0.138144	0.895705	-4.52849
RPL7AP7	0.274019	2.93727	1.55406	0.138178	0.895705	-4.52866
ESRRAP2	0.295557	2.38972	1.55333	0.138351	0.895705	-4.52953
IGKV3D-7	0.335467	5.49865	1.55326	0.138368	0.895705	-4.52962
RPL37P21	0.297204	1.96106	1.5532	0.138382	0.895705	-4.52968
RAB8B	0.311786	3.81238	1.55318	0.138386	0.895705	-4.5297
EIF2AK2	0.360137	6.09689	1.55292	0.138448	0.895705	-4.53002
PCLO	0.252384	4.48656	1.55197	0.138676	0.895705	-4.53115
MTHFD1L	0.288928	3.21134	1.55176	0.138726	0.895705	-4.53141
IGHVII-78-1	0.265662	4.34857	1.55165	0.138751	0.895705	-4.53153
CCDC126	0.346332	4.78337	1.55112	0.138879	0.895705	-4.53217
DNAJB9	0.326837	5.89525	1.5511	0.138883	0.895705	-4.53219
LSM1P1	0.314004	3.1237	1.55073	0.138971	0.895705	-4.53263
TSNARE1	0.279808	3.54568	1.55058	0.139006	0.895705	-4.53281
DGAT2L7P	0.290165	3.56013	1.55058	0.139008	0.895705	-4.53281
TNFAIP6	0.376696	5.98968	1.55045	0.139037	0.895705	-4.53296
RBM6	0.272907	9.15169	1.55005	0.139135	0.895757	-4.53345
LGALS17A	0.308214	4.00054	1.54989	0.139173	0.895757	-4.53364
ARG2	0.340036	3.16492	1.54976	0.139204	0.895757	-4.53379
IL21R-AS1	0.256876	2.6346	1.54936	0.139298	0.895757	-4.53426
UBE2J1	0.299678	6.25257	1.54854	0.139496	0.895757	-4.53524
MYO5A	0.285901	4.35129	1.5481	0.139602	0.895757	-4.53577
CDC42	0.258979	6.02724	1.5476	0.139722	0.895757	-4.53637
SKAP2	0.290748	5.42025	1.54751	0.139743	0.895757	-4.53647
CXorf66	0.283701	2.22026	1.54736	0.139779	0.895757	-4.53665
AHR	0.308828	6.6408	1.54724	0.139808	0.895757	-4.53679
HNRNPA1P67	0.255779	2.90227	1.54541	0.140248	0.896115	-4.53897
STAB2	0.268578	3.66266	1.54535	0.140263	0.896115	-4.53904
ABCA12	0.288792	2.10964	1.54439	0.140494	0.896115	-4.54019
C5AR1	0.31357	5.75449	1.54385	0.140625	0.896115	-4.54083
FGD5P1	0.265938	2.61436	1.5437	0.140659	0.896115	-4.541
RBM23	0.33329	7.22711	1.54347	0.140716	0.896115	-4.54128
FLNB	0.262706	4.7538	1.54343	0.140725	0.896115	-4.54132
IQGAP2	0.32225	5.13502	1.54331	0.140755	0.896115	-4.54147
TRIM69	0.290747	5.13519	1.54327	0.140765	0.896115	-4.54152
GAS7	0.352944	4.01881	1.54283	0.140871	0.896115	-4.54204
HMGN2P46	0.26986	5.0019	1.54217	0.14103	0.896115	-4.54282
NEXN	0.459217	6.14758	1.54173	0.141136	0.896115	-4.54334
RPSAP5	0.280604	4.16408	1.54126	0.141251	0.896115	-4.54391
PPP1R11P2	0.257851	2.19902	1.54107	0.141296	0.896115	-4.54413
JAK2	0.295749	4.90572	1.54104	0.141304	0.896115	-4.54417
OR52E1	0.266743	1.7695	1.54094	0.141328	0.896115	-4.54428
CCDC113	0.253181	2.21574	1.54071	0.141384	0.896115	-4.54456
RHOXF1	0.252553	2.48116	1.54046	0.141445	0.896115	-4.54486
PSPHP1	0.297394	6.23155	1.53959	0.141655	0.896115	-4.54588
RPLP0P1	0.317521	3.91701	1.53951	0.141676	0.896115	-4.54599
MT1XP1	0.306514	5.38556	1.53883	0.141841	0.896115	-4.54679
PMEPA1	0.290216	5.09166	1.53719	0.142239	0.896115	-4.54873
SLC30A7	0.279196	4.29126	1.53684	0.142325	0.896115	-4.54915
PLPP3	0.295268	6.61419	1.53664	0.142374	0.896115	-4.54939
ACSM1	0.271659	3.12924	1.53641	0.142431	0.896115	-4.54966
MPP1	0.27094	4.69518	1.53628	0.142462	0.896115	-4.54981
HMGB3P14	0.258707	2.47733	1.53609	0.142508	0.896115	-4.55004
IQGAP1	0.277658	7.8022	1.53598	0.142534	0.896115	-4.55016
TCP11L1	0.276413	2.91403	1.53593	0.142546	0.896115	-4.55022
CIRBP-AS1	0.248956	5.86317	1.53586	0.142565	0.896115	-4.55031
DYSF	0.303338	4.59305	1.53536	0.142686	0.896115	-4.5509
ARPC3	0.268334	7.16369	1.53526	0.14271	0.896115	-4.55101
RIOK3P1	0.291648	2.7965	1.53521	0.142722	0.896115	-4.55107
BCORL1	0.28352	4.66245	1.53514	0.142741	0.896115	-4.55116
GGT5	0.302711	6.14846	1.53509	0.142752	0.896115	-4.55122
IL13RA2	0.292034	2.61482	1.53488	0.142803	0.896115	-4.55146
CHKB	0.274966	4.98145	1.53474	0.142839	0.896115	-4.55164
RNF17	0.273492	2.10454	1.53444	0.14291	0.896115	-4.55199
FAM114A1	0.304184	2.23566	1.53443	0.142912	0.896115	-4.552
ZNF524	0.256174	4.10322	1.53391	0.143041	0.896115	-4.55262
IGHV2OR16-5	0.273878	5.35363	1.53329	0.143193	0.896115	-4.55335
MDK	0.282814	7.40279	1.53321	0.143212	0.896115	-4.55344
VDAC2P2	0.249086	4.62719	1.53248	0.143391	0.896115	-4.55431
FLJ42969	0.256753	3.17598	1.53217	0.143468	0.896115	-4.55468
AMY1A	0.248504	2.44593	1.53177	0.143566	0.896115	-4.55515
PRSS35	0.293003	3.12116	1.53149	0.143635	0.896115	-4.55548
TBC1D22A	0.250665	5.4752	1.53057	0.14386	0.896115	-4.55656
CELF3	0.270671	4.59499	1.53035	0.143914	0.896115	-4.55682
PATE3	0.290307	3.22271	1.52997	0.144009	0.896115	-4.55728
SCGB1D2	0.255543	5.11497	1.52958	0.144104	0.896115	-4.55773
RPL17P45	0.270918	1.99629	1.52958	0.144104	0.896115	-4.55773
MPI	0.247247	4.97704	1.5295	0.144125	0.896115	-4.55783
SIPA1L1	0.363728	2.91024	1.52895	0.144259	0.896115	-4.55847
DNAJA1P2	0.269185	2.16684	1.52864	0.144336	0.896115	-4.55885
ARHGEF7	0.250432	4.87427	1.52834	0.144411	0.896115	-4.55921
FCGR3A	0.360187	3.3232	1.52765	0.14458	0.896115	-4.56001
UNC5C	0.334026	3.1895	1.52764	0.144583	0.896115	-4.56003
RPL29P28	0.25663	2.94678	1.52728	0.144672	0.896115	-4.56045
DPP3P2	0.317242	3.4411	1.52724	0.144681	0.896115	-4.5605
ATP6V1A	0.310301	5.24792	1.52718	0.144697	0.896115	-4.56057
CSPG4P13	0.248209	5.45126	1.52707	0.144725	0.896115	-4.5607
VAX1	0.254107	5.43981	1.52688	0.14477	0.896115	-4.56092
BEX4	0.377389	4.85887	1.52678	0.144796	0.896115	-4.56104
TRAJ56	0.319118	2.62019	1.52666	0.144827	0.896115	-4.56119
CYCSP38	0.29074	2.34828	1.52635	0.144902	0.896115	-4.56155
MT1L	0.267214	5.32865	1.52609	0.144967	0.896115	-4.56186
PTGS1	0.304387	4.95007	1.52595	0.145001	0.896115	-4.56202
ACTR3BP2	0.261549	2.95776	1.52577	0.145045	0.896115	-4.56223
ZNF17	0.305524	6.26036	1.52569	0.145066	0.896115	-4.56233
KRTAP5-AS1	0.286523	5.99059	1.52501	0.145234	0.896115	-4.56313
SRGAP2D	0.28143	6.51225	1.5238	0.145535	0.896115	-4.56456
CCNB3P1	0.25705	2.66045	1.52334	0.145648	0.896115	-4.56509
ALDH1L1-AS2	0.284775	2.28067	1.52314	0.145699	0.896115	-4.56533
ZNF285	0.271092	1.97487	1.52288	0.145764	0.896115	-4.56564
STX11	0.248192	3.67101	1.52225	0.14592	0.896115	-4.56638
NFIA-AS2	0.259096	2.7328	1.52168	0.146061	0.896115	-4.56704
SH3GL3	0.28185	1.93733	1.52164	0.146072	0.896115	-4.5671
CALB2	0.323154	2.83504	1.52155	0.146093	0.896115	-4.5672
CSNK1A1	0.283625	6.9646	1.52115	0.146195	0.896115	-4.56768
OR4C50P	0.294661	2.12695	1.52029	0.146408	0.896115	-4.56868
RWDD2A	0.275869	3.62373	1.51966	0.146565	0.896115	-4.56942
P4HA3	0.260101	3.63545	1.51954	0.146597	0.896115	-4.56957
HOMER3	0.272419	5.41407	1.51949	0.146609	0.896115	-4.56963
ATF7IP	0.263985	7.04105	1.5194	0.146632	0.896115	-4.56973
CYTIP	0.300592	4.18461	1.51936	0.146641	0.896115	-4.56978
NPAP1P2	0.298286	2.92855	1.51886	0.146766	0.896115	-4.57037
ATP2B2-IT2	0.25937	1.8996	1.51883	0.146774	0.896115	-4.5704
TPBGL	0.310573	2.95894	1.51873	0.146799	0.896115	-4.57052
NR1D2	0.289998	3.21711	1.51851	0.146853	0.896115	-4.57078
FGF7	0.374351	3.75403	1.51828	0.146911	0.896115	-4.57105
RAC1P8	0.27603	3.61726	1.51817	0.146939	0.896115	-4.57118
TIA1	0.355442	4.94318	1.51807	0.146965	0.896115	-4.5713
MTMR1	0.276938	4.07554	1.51746	0.147116	0.896346	-4.57201
QRSL1P3	0.252593	2.87119	1.51645	0.14737	0.896346	-4.5732
DUXAP10	0.266073	6.89273	1.51619	0.147435	0.896346	-4.5735
GTF2F2P1	0.260151	2.12311	1.51612	0.147453	0.896346	-4.57359
DUTP3	0.258851	2.98617	1.51577	0.147541	0.896346	-4.574
PPP1R9B	0.244667	4.34306	1.5153	0.14766	0.8968	-4.57455
EAPP	0.267206	5.09916	1.5148	0.147786	0.8968	-4.57514
IGKV1D-37	0.30156	5.22785	1.5147	0.147809	0.8968	-4.57525
HTR5A	0.243904	2.49551	1.51448	0.147864	0.8968	-4.5755
IGSF21	0.327585	4.34989	1.51398	0.147991	0.8968	-4.57609
ZNF208	0.252687	6.75803	1.51335	0.14815	0.8968	-4.57683
ROR2	0.300216	4.15014	1.51308	0.148219	0.8968	-4.57715
THEM5	0.257764	4.61583	1.51292	0.148257	0.8968	-4.57733
MED15P6	0.298824	3.91263	1.51267	0.148321	0.8968	-4.57763
PPIAP19	0.267056	4.26647	1.51266	0.148323	0.8968	-4.57764
ZFAND3	0.287122	5.97373	1.5126	0.14834	0.8968	-4.57772
ZNF385D	0.285047	2.72378	1.51236	0.148401	0.8968	-4.578
SEC14L2	0.307231	4.92983	1.51203	0.148482	0.8968	-4.57838
KRTAP22-2	0.272786	1.77871	1.51203	0.148482	0.8968	-4.57838
ADARB1	0.358568	3.52108	1.51188	0.14852	0.8968	-4.57855
COL8A2	0.284661	3.66995	1.51049	0.148873	0.898043	-4.58019
DNM1P34	0.250605	5.92954	1.50925	0.149187	0.898695	-4.58163
SPON1	0.383518	3.57159	1.50915	0.149212	0.898695	-4.58175
PBX2P1	0.317763	4.02939	1.50848	0.149383	0.898713	-4.58254
TRIP11	0.3447	4.13508	1.50836	0.149412	0.898713	-4.58267
HAMP	0.289761	5.14309	1.50804	0.149493	0.898998	-4.58304
TNKS2-AS1	0.264873	2.05457	1.50725	0.149695	0.899221	-4.58397
PCAT6	0.281248	4.36326	1.50688	0.149789	0.899593	-4.58441
BTBD19	0.307895	4.24232	1.50575	0.150077	0.899894	-4.58572
CXCR2P1	0.247978	3.62187	1.50548	0.150146	0.899894	-4.58604
ASMTL-AS1	0.261238	6.24822	1.50504	0.150258	0.899894	-4.58656
PRCD	0.266493	5.00791	1.50454	0.150384	0.899894	-4.58713
CAPN12	0.288413	3.537	1.50363	0.150617	0.899894	-4.5882
SAMHD1	0.414787	5.27596	1.50354	0.15064	0.899894	-4.5883
MXRA8	0.397748	4.32565	1.50267	0.150864	0.900499	-4.58932
LIMK1	0.290807	4.89536	1.50211	0.151008	0.900816	-4.58998
SPDYE5	0.244336	4.44439	1.50155	0.151151	0.900816	-4.59063
CSRP3	0.294351	4.75448	1.50111	0.151263	0.900816	-4.59114
IRF4	0.280792	5.56468	1.50092	0.151313	0.900816	-4.59136
RPL36P18	0.286868	5.11174	1.50027	0.151479	0.901569	-4.59212
IGKV1D-42	0.314734	6.4682	1.49985	0.151587	0.901706	-4.5926
IGLC7	0.500835	5.95201	1.49944	0.151691	0.901706	-4.59308
CC2D2B	0.255407	1.79052	1.49902	0.151799	0.901797	-4.59357
PSMC1P11	0.241658	3.04281	1.49884	0.151847	0.901797	-4.59378
NALCN-AS1	0.247463	3.84307	1.49873	0.151873	0.901797	-4.5939
PCAT29	0.254977	2.75799	1.49781	0.15211	0.901797	-4.59497
BST2	0.280127	6.39242	1.49727	0.152251	0.901797	-4.59561
SCRN1	0.263236	4.38469	1.49689	0.15235	0.901797	-4.59605
DST	0.394717	6.31135	1.49674	0.152387	0.901797	-4.59622
NCAM1-AS1	0.268717	4.6225	1.49661	0.152422	0.901797	-4.59638
TMED9	0.278657	6.84246	1.49598	0.152584	0.901797	-4.59711
IGLV3-19	0.37301	5.30737	1.49588	0.152608	0.901797	-4.59722
KRT80	0.252159	3.43121	1.49579	0.152632	0.901797	-4.59733
GAB4	0.292655	5.45924	1.49579	0.152634	0.901797	-4.59733
OTUD7B	0.281233	3.13316	1.49545	0.152721	0.901797	-4.59772
GPR17	0.278378	4.39591	1.49469	0.152917	0.901797	-4.5986
SOS1	0.24803	4.75106	1.49469	0.152918	0.901797	-4.59861
BLOC1S6	0.32654	5.71509	1.49467	0.152922	0.901797	-4.59863
UBXN4	0.326256	6.92989	1.49448	0.152972	0.901797	-4.59885
ROBO2	0.302689	2.24222	1.49415	0.153058	0.901797	-4.59924
OR6K1P	0.252278	2.65929	1.49414	0.15306	0.901797	-4.59924
GUSBP9	0.291492	6.74859	1.49392	0.153118	0.901797	-4.59951
LRFN5	0.2437	2.6322	1.49367	0.153181	0.901797	-4.59979
SLC6A2	0.281659	3.11783	1.49362	0.153195	0.901797	-4.59985
MALT1	0.276444	3.48286	1.49333	0.15327	0.902041	-4.60018
OR7E5P	0.274324	5.28763	1.49234	0.153526	0.902578	-4.60133
HOXA5	0.244875	3.24513	1.49168	0.153699	0.902987	-4.6021
CALM2P1	0.261729	2.09239	1.49159	0.153722	0.902987	-4.6022
ADAM9	0.298325	5.70777	1.49142	0.153765	0.90301	-4.6024
TET1	0.344828	3.95938	1.4909	0.153902	0.903279	-4.60301
FGL2	0.317472	4.78244	1.49086	0.153911	0.903279	-4.60305
PHBP13	0.273319	2.30689	1.49074	0.153943	0.903279	-4.60319
KRTAP2-2	0.253629	5.71856	1.49004	0.154124	0.903537	-4.604
PRO1804	0.261795	3.19176	1.48993	0.154153	0.903537	-4.60412
FPR2	0.298618	4.38091	1.48891	0.154419	0.903933	-4.60531
ATP6AP2	0.27664	7.71851	1.48876	0.154459	0.903974	-4.60548
CA5BP1	0.262308	6.32549	1.48825	0.154593	0.903981	-4.60608
SULF2	0.312887	7.72651	1.48768	0.15474	0.904358	-4.60673
RBBP4P1	0.290268	3.86442	1.48703	0.154912	0.904358	-4.60749
RNF208	0.266208	4.92007	1.48618	0.155133	0.904358	-4.60847
TAAR2	0.246162	1.74735	1.48563	0.155278	0.904358	-4.60911
OSTM1-AS1	0.281911	3.20522	1.48531	0.155361	0.904358	-4.60947
PRPS1P2	0.254309	3.11153	1.48439	0.155603	0.904358	-4.61054
ZNF415	0.256414	3.76067	1.48376	0.155768	0.904358	-4.61127
COX6CP3	0.32706	2.79404	1.48365	0.155799	0.904358	-4.6114
ARHGEF19	0.241187	5.67844	1.48351	0.155834	0.904358	-4.61156
TATDN2P3	0.272874	2.84261	1.48328	0.155895	0.904358	-4.61182
OR6K2	0.30669	1.99824	1.48316	0.155927	0.904358	-4.61196
UBE2E2-AS1	0.256251	3.56353	1.48273	0.156039	0.904358	-4.61245
MSANTD3-TMEFF1	0.280865	4.29007	1.48269	0.156049	0.904358	-4.6125
[truncated: 25,303 more rows]

## Sheet: SE vs DE
Gene	logFC	AveExpr	t	P.Value	adj.P.Val	B
GUCY2C	2.02933	4.79241	6.55679	9.98418e-06	0.0908627	3.20431
HSPE1P2	1.13811	5.07362	5.96691	2.79635e-05	0.127243	2.39332
XRCC2	1.22445	2.94685	5.79739	3.79305e-05	0.130285	2.14876
NT5C3A	1.20073	4.35537	5.63408	5.1068e-05	0.130285	1.90834
CDKN3	1.36498	3.72709	5.4824	6.75314e-05	0.130285	1.68085
NR3C2	0.881894	3.63085	5.46232	7.00937e-05	0.130285	1.65042
TOP2A	1.60774	6.2129	5.38681	8.06631e-05	0.130285	1.53542
PIGR	2.77794	7.49773	5.35757	8.51903e-05	0.130285	1.49061
PDSS1	1.22559	5.18972	5.24545	0.000105137	0.132608	1.31748
AGR2	1.60351	8.66808	5.2233	0.00010962	0.132608	1.28302
FABP1	2.91332	7.22298	5.13281	0.000130092	0.136607	1.14141
PRIM2	1.11951	4.02628	5.10106	0.000138183	0.139729	1.09139
EHF	1.35046	6.24027	5.06462	0.000148113	0.141295	1.03379
SNORD59A	0.782895	2.86632	5.04325	0.000154275	0.141295	0.999914
ADAMDEC1	1.01972	5.24488	4.96692	0.000178544	0.141295	0.878294
CENPF	0.867113	4.15726	4.87732	0.000212136	0.141295	0.73435
CLCA4	1.12296	2.74897	4.86136	0.000218773	0.141295	0.708578
NCAPG	0.827113	3.67535	4.85701	0.000220621	0.141295	0.701539
TFB2M	0.83303	3.82977	4.85277	0.000222434	0.141295	0.694688
CCNA2	1.21723	4.17024	4.82802	0.000233342	0.144788	0.654602
MUC2	1.72198	6.81631	4.75355	0.0002696	0.152269	0.533452
RRM1	0.792631	5.44743	4.72681	0.000283991	0.15239	0.489761
WDR43	0.839029	4.20687	4.69426	0.000302588	0.154761	0.436416
CCL20	2.02474	4.45024	4.67201	0.000316021	0.154761	0.399854
MRPL11	0.771387	5.87463	4.66972	0.000317435	0.154761	0.396095
AGR3	1.13099	3.34263	4.65142	0.000328994	0.155039	0.365967
ZNF165	0.773684	2.72399	4.6468	0.000331978	0.155039	0.358359
ACSS2	1.09087	5.24804	4.62006	0.000349812	0.156566	0.314246
TPD52	1.10612	7.11999	4.53067	0.000416921	0.173571	0.166026
APOBEC1	1.22065	4.25263	4.52289	0.000423357	0.173571	0.153071
ARV1	0.950135	3.45564	4.48328	0.000457736	0.173571	0.0869919
SORD	1.36081	8.79027	4.46648	0.000473162	0.176962	0.0589174
ESRP1	0.73717	4.47474	4.45236	0.000486549	0.177887	0.0352743
OSGIN2	0.941976	5.22502	4.39407	0.000546029	0.180712	-0.0625565
SYNGR2	0.808192	6.89137	4.38975	0.00055073	0.180712	-0.0698346
SORD2P	1.3831	8.66438	4.38951	0.000550993	0.180712	-0.0702397
TGDS	1.00417	4.80911	4.37353	0.000568721	0.180712	-0.097131
ARHGAP11B	0.74187	2.86192	4.33764	0.000610721	0.183143	-0.157677
PIGT	0.686232	5.03298	4.32131	0.000630874	0.183143	-0.185285
FXN	0.712056	3.96219	4.31672	0.000636655	0.183143	-0.193043
SNORD78	0.805953	3.88397	4.31077	0.000644242	0.183143	-0.203121
RAD54B	0.912197	4.02039	4.30617	0.000650164	0.183143	-0.210906
HSPE1	1.55025	8.55933	4.28893	0.000672857	0.185265	-0.240104
ANAPC1	0.83099	3.64717	4.2774	0.000688491	0.185265	-0.259658
PGK1	0.863673	4.47418	4.27019	0.000698455	0.185265	-0.271892
HSPE1P6	0.956769	3.92494	4.25063	0.000726236	0.187824	-0.305117
MTND4P24	0.80174	5.68895	4.23883	0.000743534	0.189482	-0.325175
SNORD3C	0.926258	7.51015	4.22936	0.00075772	0.189791	-0.341284
JCHAIN	1.52293	6.85299	4.19065	0.000818654	0.197796	-0.407248
PIGP	0.808854	3.68854	4.16998	0.000853205	0.200812	-0.442525
COX5A	0.789506	5.9957	4.1632	0.000864865	0.200879	-0.454112
VBP1	0.799785	4.59605	4.16101	0.000868676	0.200879	-0.457866
PLEKHS1	0.638848	3.66649	4.13572	0.000913815	0.202245	-0.501128
UBE2Q2P5Y	0.639101	3.54553	4.12231	0.000938697	0.202245	-0.524079
CKAP2L	0.84676	5.05188	4.11582	0.000950996	0.202245	-0.535204
PCNA	0.703514	4.34393	4.10626	0.000969409	0.202245	-0.551594
SNORA71C	0.973917	9.569	4.10286	0.000976055	0.202245	-0.557433
MUC13	1.15274	4.60862	4.09863	0.000984374	0.202245	-0.564689
ANK3	1.29049	4.72346	4.0982	0.000985223	0.202245	-0.565426
RPS23P4	0.793606	4.42757	4.09198	0.000997598	0.203257	-0.576098
CDCA8	0.875759	3.33399	4.06017	0.00106342	0.206929	-0.630749
IARS2	0.684024	4.41923	4.05689	0.00107046	0.206929	-0.636391
NUDT7	0.69699	4.04116	4.04562	0.00109497	0.206929	-0.655764
RPL23AP73	0.731401	5.66489	4.04546	0.00109533	0.206929	-0.656048
VIL1	0.838735	4.85569	4.00801	0.00118105	0.210017	-0.72055
BMP5	1.18472	2.89661	4.00651	0.00118463	0.210017	-0.723143
EPCAM	0.950625	6.08226	3.99607	0.0012098	0.211024	-0.741153
PLAC8	1.12454	6.91114	3.95722	0.00130831	0.22281	-0.808236
KIF15	0.906038	2.72071	3.95496	0.0013143	0.22281	-0.812151
C1orf53	0.755577	3.65198	3.95204	0.00132207	0.22281	-0.817205
CNOT7	0.590767	2.2799	3.9369	0.00136305	0.224234	-0.843379
TUBB4B	0.708345	8.54746	3.93207	0.00137641	0.224234	-0.851739
SS18L1	0.588431	3.47789	3.92895	0.00138511	0.224234	-0.857148
RCC2	0.714815	5.36974	3.92149	0.00140613	0.224234	-0.870066
MMP12	1.29949	5.16832	3.91041	0.00143795	0.224234	-0.889258
CCDC58	1.09635	5.07821	3.90706	0.0014477	0.224234	-0.895059
SNORD82	1.03096	3.95444	3.90117	0.00146503	0.224234	-0.905269
KRTCAP3	0.871316	3.59493	3.89777	0.00147513	0.224234	-0.91116
AIMP1	0.588019	6.26894	3.89654	0.00147879	0.224234	-0.913291
CYC1	0.72362	6.60679	3.89359	0.00148763	0.224234	-0.918403
EIF2AK1	0.989579	6.1931	3.88949	0.0015	0.224234	-0.925507
FANCF	1.17575	5.55715	3.88295	0.00151997	0.224234	-0.936858
TSACC	0.81931	3.33893	3.88068	0.00152693	0.224234	-0.940783
TTK	0.708385	3.68687	3.87071	0.00155802	0.224234	-0.958082
ASB3	0.623794	3.78736	3.8685	0.001565	0.224234	-0.961919
ANAPC7	0.869455	5.676	3.86213	0.00158529	0.224234	-0.972981
UGT2B15	0.971159	2.94922	3.85888	0.00159575	0.224234	-0.978623
VWA5B1	0.574491	3.82422	3.85269	0.00161585	0.224234	-0.989372
BRCC3	0.67422	4.89288	3.85224	0.00161732	0.224234	-0.990152
HMGB3	0.696781	4.9472	3.85054	0.00162288	0.224234	-0.993102
HSP90AA6P	0.604058	2.17963	3.84761	0.00163252	0.224234	-0.998186
IDI1	0.57396	3.68674	3.84304	0.00164769	0.224926	-1.00613
FAIM	0.5935	3.34777	3.82722	0.00170129	0.229293	-1.03362
HOOK1	1.09495	4.4423	3.82549	0.00170725	0.229293	-1.03663
SLC35D2	0.611159	3.17603	3.82365	0.00171365	0.229293	-1.03984
SNORD3A	0.677161	8.04951	3.82134	0.00172167	0.229293	-1.04386
HSPE1P23	0.586634	2.41373	3.81458	0.0017454	0.230623	-1.05561
CDC20	0.67651	4.43986	3.8113	0.001757	0.230623	-1.06131
UGT8	0.647208	5.39433	3.80085	0.00179458	0.232207	-1.07949
ZNF613	0.714484	3.98967	3.78585	0.00184997	0.23492	-1.10561
DUOX2	0.975127	5.06003	3.77795	0.00187981	0.236636	-1.11937
MGST1	1.01976	6.15071	3.77768	0.00188082	0.236636	-1.11983
TC2N	0.871427	4.97406	3.77014	0.0019098	0.237585	-1.13297
RPA3	1.27805	5.40371	3.76623	0.00192498	0.237617	-1.13978
PSMG2	0.751078	4.729	3.76041	0.00194782	0.237741	-1.14992
MAL2	1.39378	6.21318	3.75716	0.00196069	0.237829	-1.15558
GHITM	0.561895	5.87833	3.74544	0.00200786	0.238354	-1.17602
MCM3	0.801492	4.59872	3.7453	0.00200842	0.238354	-1.17626
CHCHD7	0.760317	5.38502	3.74367	0.00201504	0.238354	-1.17909
CFTR	0.922031	3.85291	3.74165	0.00202332	0.238354	-1.18262
SRP9	0.55969	5.19814	3.73737	0.00204095	0.238354	-1.19008
RPS3AP33	0.644546	3.85467	3.73681	0.00204329	0.238354	-1.19107
TXN	0.948518	9.4073	3.72297	0.00210146	0.242084	-1.21521
GDPD3	0.688348	5.78032	3.71943	0.0021166	0.242658	-1.22138
PSMG4	0.644938	5.31593	3.71606	0.00213114	0.242658	-1.22727
RAD51C	0.764765	5.54317	3.71419	0.00213922	0.242658	-1.23052
MRAP2	0.801436	4.39928	3.71151	0.00215088	0.242658	-1.2352
SNORD3B-1	0.78847	7.80852	3.70567	0.00217653	0.244542	-1.2454
TAF4B	0.559089	2.64273	3.70005	0.00220147	0.245824	-1.2552
PAICS	0.808867	3.66227	3.69619	0.00221879	0.245824	-1.26195
BCL2L14	0.855748	4.61452	3.68765	0.0022576	0.245824	-1.27686
TEX261	0.989491	4.58356	3.68723	0.00225951	0.245824	-1.27759
ZC3H12A	0.583758	3.97772	3.68713	0.00225999	0.245824	-1.27778
VPS53	0.65592	3.40413	3.68293	0.00227931	0.245824	-1.2851
TFF3	0.983987	8.5718	3.67326	0.00232453	0.245824	-1.30201
OTUD6B	0.572418	5.1533	3.66153	0.00238056	0.245824	-1.32251
SCP2	0.844849	5.18958	3.66044	0.0023858	0.245824	-1.3244
C6orf136	0.827283	6.79318	3.65919	0.0023919	0.245824	-1.3266
FAM162A	0.568009	5.86004	3.65798	0.00239779	0.245824	-1.32871
SNX6	0.809158	5.22578	3.65797	0.00239781	0.245824	-1.32872
LCN2	1.9294	6.54777	3.65497	0.00241246	0.245824	-1.33396
RNF43	0.767511	5.96194	3.65141	0.00242996	0.246628	-1.34018
CRLS1	0.695001	3.39555	3.6396	0.00248899	0.250754	-1.36084
HIGD1AP16	0.5514	2.47662	3.62723	0.00255232	0.254769	-1.38248
CHAF1A	0.639199	3.2924	3.62318	0.00257342	0.254769	-1.38956
CDH1	0.842911	6.96694	3.62278	0.0025755	0.254769	-1.39026
TXNDC17	0.684349	7.96156	3.61748	0.00260338	0.255674	-1.39953
ATIC	0.805638	4.25859	3.61413	0.00262114	0.256496	-1.40538
HEATR3	0.519883	4.06813	3.60972	0.00264473	0.257503	-1.4131
CYCS	1.09704	7.78231	3.60373	0.00267714	0.257503	-1.42359
MARVELD2	1.01064	5.63721	3.60109	0.00269157	0.257503	-1.42822
ILF2	0.920988	4.57297	3.59997	0.00269769	0.257503	-1.43017
MAPKAPK5	0.598626	7.90812	3.59735	0.00271211	0.257503	-1.43476
RPS14P8	0.597436	5.91009	3.59688	0.00271469	0.257503	-1.43558
AGA	0.564461	5.36248	3.5945	0.00272786	0.257503	-1.43975
RPL7P2	0.806223	3.47706	3.59365	0.00273256	0.257503	-1.44123
RFC4	0.660707	5.7098	3.59148	0.00274461	0.257503	-1.44502
E2F5	0.708912	4.14995	3.58876	0.00275987	0.258047	-1.4498
S100P	0.843431	9.46739	3.58689	0.00277038	0.258146	-1.45307
KRT18	1.04831	5.3112	3.58161	0.00280028	0.258977	-1.46232
RPL7P50	0.540248	3.96301	3.5803	0.00280776	0.258977	-1.46461
FOXD2	0.586721	3.6709	3.57641	0.00283	0.259237	-1.47141
C1orf112	0.685256	3.23684	3.57596	0.00283262	0.259237	-1.47221
IKZF4	0.580524	4.02643	3.57186	0.00285633	0.259237	-1.47939
SNORA71D	0.695863	9.53343	3.56993	0.00286754	0.259237	-1.48276
SNORA50C	0.84423	6.65295	3.56711	0.00288404	0.259589	-1.4877
GAPDHP45	0.614255	6.36033	3.56155	0.00291681	0.259589	-1.49744
SLC25A25-AS1	0.757989	6.37567	3.56092	0.00292056	0.259589	-1.49854
CMBL	0.624798	5.6028	3.55516	0.00295496	0.259589	-1.50863
NDUFA4	0.812634	6.23382	3.55314	0.0029671	0.259589	-1.51216
HSPE1P8	1.1585	4.43727	3.55307	0.00296756	0.259589	-1.51229
TMEM45B	1.08772	5.83497	3.5501	0.00298553	0.259589	-1.51749
PLK4	0.927066	2.8	3.54396	0.00302304	0.261187	-1.52825
RSL1D1	0.551577	6.41388	3.51907	0.00317998	0.269181	-1.57185
PVT1	0.743334	5.51558	3.51867	0.00318259	0.269181	-1.57256
DCUN1D1	0.562245	3.46522	3.51614	0.00319898	0.269181	-1.57699
MTND2P28	0.733977	10.1593	3.51317	0.00321839	0.269181	-1.5822
NCAPH	0.64289	3.64868	3.51024	0.0032376	0.269491	-1.58733
SLC12A2	1.31863	7.66998	3.50541	0.00326963	0.27133	-1.59581
OLFM4	1.41799	6.68679	3.50187	0.00329324	0.271691	-1.60201
MGAM2	1.01992	3.95194	3.49727	0.00332416	0.271691	-1.61006
CKMT1A	1.22853	4.61345	3.49598	0.00333296	0.271691	-1.61234
GPR160	1.15991	8.00223	3.49333	0.00335095	0.272285	-1.61698
GMFB	0.637608	7.30589	3.48962	0.00337631	0.272671	-1.62348
TWF1P1	0.612876	4.7476	3.48734	0.00339204	0.272671	-1.62748
CHD1L	0.825156	5.34444	3.48681	0.00339565	0.272671	-1.6284
SI	1.57682	2.64676	3.48527	0.00340636	0.272729	-1.63111
APOO	0.705592	3.85664	3.48296	0.00342237	0.273209	-1.63515
ATE1	0.624358	3.51515	3.46662	0.00353807	0.280634	-1.66381
UQCR10	0.568822	6.59359	3.46266	0.00356666	0.280634	-1.67074
CXCL14	0.620573	4.94095	3.46164	0.00357409	0.280634	-1.67254
RPS2P46	0.82113	8.85097	3.45589	0.00361617	0.281279	-1.68262
ZNF121	0.773611	4.00965	3.45052	0.00365585	0.283557	-1.69203
NCEH1	0.624479	4.40218	3.43785	0.00375134	0.287009	-1.71425
DKC1	0.816151	6.67384	3.43764	0.00375292	0.287009	-1.71462
PRR11	0.953613	5.41695	3.43332	0.00378606	0.28746	-1.72219
OR2AP1	0.579508	2.15585	3.43276	0.0037904	0.28746	-1.72318
PLD1	0.580387	3.41988	3.425	0.00385072	0.290092	-1.73679
PABPC1P4	0.70551	5.17271	3.4218	0.00387585	0.290092	-1.7424
TTI1	0.845439	4.58845	3.41954	0.00389372	0.290092	-1.74636
EIF1AX	0.628345	4.18051	3.41888	0.00389895	0.290092	-1.74752
SLC17A4	0.946975	3.84084	3.4165	0.00391788	0.290668	-1.75169
MRPL30P1	0.557938	4.99834	3.41276	0.00394782	0.291198	-1.75825
GCOM1	0.522333	3.82331	3.40897	0.00397835	0.291198	-1.76489
TFF1	1.55293	7.38186	3.40426	0.00401672	0.292296	-1.77317
PITHD1	0.586678	6.22586	3.39682	0.00407798	0.293765	-1.78621
USP1	0.613838	3.64387	3.39415	0.00410019	0.294588	-1.79089
FABP6	0.794919	6.04847	3.3876	0.00415517	0.294854	-1.80238
RPS26P52	0.705179	5.16271	3.38752	0.00415587	0.294854	-1.80252
COIL	0.66633	3.39796	3.38199	0.00420292	0.294854	-1.81222
CDH17	1.06973	5.52399	3.37488	0.0042641	0.294854	-1.82468
HNF4G	1.11379	4.98843	3.36923	0.00431342	0.294854	-1.83459
FGFBP1	0.643364	3.8901	3.36861	0.00431885	0.294854	-1.83568
EEF1A1P32	0.555149	2.07034	3.36773	0.00432663	0.294854	-1.83723
BZW2	0.624225	3.52215	3.36756	0.00432808	0.294854	-1.83752
RPSAP76	0.580806	3.31092	3.3675	0.00432863	0.294854	-1.83763
DPM1	0.588917	2.45496	3.3662	0.00434011	0.294854	-1.83991
RPL36AP26	0.740833	7.25645	3.36285	0.00436975	0.294854	-1.84578
IHH	0.718242	4.96533	3.36188	0.00437844	0.294854	-1.84749
SDHB	0.597632	4.6421	3.36045	0.00439118	0.294854	-1.85
GSPT1	0.63558	3.16559	3.35872	0.00440663	0.294854	-1.85302
FENDRR	0.817402	4.28763	3.35862	0.00440757	0.294854	-1.85321
PPME1	0.519915	4.4417	3.35632	0.00442823	0.294854	-1.85724
UQCC2	0.712758	6.23213	3.35271	0.00446086	0.294854	-1.86357
ERN2	0.59633	4.64486	3.35228	0.00446474	0.294854	-1.86432
E2F8	0.878541	3.41148	3.35131	0.00447362	0.294854	-1.86603
TMEM97	1.06626	5.28627	3.34922	0.00449268	0.294854	-1.86969
RAB4A	0.603836	5.45325	3.34658	0.00451685	0.295729	-1.87432
SNORD7	0.840483	4.02276	3.33768	0.00459933	0.297671	-1.88992
BOLA2B	0.708199	9.27096	3.3375	0.00460103	0.297671	-1.89023
PRRG4	0.654758	5.31661	3.33244	0.00464865	0.298698	-1.89911
TESK2	0.548398	2.90195	3.33233	0.00464972	0.298698	-1.89931
GSKIP	0.63238	5.29272	3.32506	0.00471896	0.301726	-1.91205
CHCHD3	0.522776	5.12517	3.32011	0.00476676	0.302929	-1.92074
NXPE4	0.847135	3.25881	3.31476	0.00481888	0.303975	-1.93011
RPS21	1.13042	9.3124	3.30964	0.00486933	0.305615	-1.93909
HSPE1P7	0.86685	5.04304	3.30622	0.00490327	0.306336	-1.94507
KRT18P17	0.709022	4.82633	3.30327	0.00493282	0.306485	-1.95025
FUT6	1.01586	6.54252	3.30151	0.00495055	0.306485	-1.95334
NMNAT2	0.513679	3.36565	3.29953	0.00497044	0.306759	-1.9568
PHOSPHO2	0.725144	3.74563	3.29875	0.00497833	0.306759	-1.95817
RPL18	0.576074	8.51115	3.29146	0.00505273	0.308612	-1.97095
NXPE1	2.16823	3.5593	3.28631	0.0051059	0.310297	-1.97998
SLC35A3	0.593726	6.01776	3.28315	0.00513889	0.310403	-1.98553
RPS7P1	0.831122	7.73322	3.27367	0.00523884	0.311547	-2.00213
EIF4A1P7	0.516556	6.3694	3.27347	0.00524096	0.311547	-2.00248
MAFTRR	0.471695	3.31593	3.2733	0.00524276	0.311547	-2.00277
DBT	0.481131	3.65332	3.27083	0.00526924	0.311547	-2.00712
ZNF630	0.64557	2.95437	3.26948	0.00528366	0.311547	-2.00947
ZMYND8	0.628288	5.8403	3.2667	0.00531366	0.311547	-2.01435
SNORD36C	0.639286	3.566	3.26647	0.00531612	0.311547	-2.01475
TMEM171	0.923307	4.51163	3.26589	0.00532241	0.311547	-2.01577
ABHD17C	0.925852	4.62149	3.26531	0.00532867	0.311547	-2.01678
CPD	0.576089	3.1436	3.26492	0.00533285	0.311547	-2.01746
SLC9A2	0.773164	3.09518	3.2642	0.00534073	0.311547	-2.01873
F5	0.750911	4.58883	3.26252	0.00535896	0.311547	-2.02167
KIF23	0.558278	4.80285	3.26216	0.00536286	0.311547	-2.02229
RPS15AP27	0.54362	4.22628	3.26042	0.00538191	0.311547	-2.02535
BROX	0.661304	3.19205	3.26037	0.00538245	0.311547	-2.02544
PRSS3	1.12703	7.37424	3.26004	0.00538606	0.311547	-2.02601
ZNRF3-AS1	0.481249	2.3069	3.25306	0.00546307	0.312825	-2.03825
ND4L	0.768628	11.3499	3.25285	0.00546535	0.312825	-2.03861
CAMKMT	0.63155	2.0351	3.24753	0.00552477	0.313334	-2.04793
GANAB	0.784817	4.73418	3.24646	0.00553682	0.313334	-2.0498
TFDP1	0.568716	6.01666	3.24322	0.00557343	0.313334	-2.05548
OCLN	0.778584	6.02242	3.23714	0.00564275	0.31481	-2.06613
EIF3K	0.573382	6.05389	3.2365	0.00565003	0.31481	-2.06724
JPH1	0.474996	2.45289	3.23221	0.00569956	0.315738	-2.07477
RPL7AP73	0.700546	5.70157	3.22806	0.00574779	0.315738	-2.08203
PDCD10	0.532671	6.55921	3.22805	0.00574789	0.315738	-2.08204
HYPK	0.881735	7.59717	3.22703	0.00575988	0.315738	-2.08384
NDUFB1P1	0.798049	6.33485	3.22565	0.00577603	0.315738	-2.08625
RPL23AP91	0.550556	4.73995	3.22532	0.00577983	0.315738	-2.08682
OR7E29P	0.594774	3.34479	3.22511	0.00578233	0.315738	-2.08719
PLK1	0.889621	5.94727	3.22325	0.00580428	0.316304	-2.09045
PDE4C	1.02934	6.12099	3.21757	0.00587158	0.318699	-2.10039
DHFR	0.627299	6.27362	3.21178	0.00594109	0.320177	-2.11053
RPL7P6	0.535251	4.00651	3.21056	0.00595587	0.320177	-2.11267
RPL30P7	0.752459	4.58197	3.21041	0.00595768	0.320177	-2.11293
MUL1	0.573011	3.51114	3.21025	0.00595964	0.320177	-2.11321
TPX2	0.695937	4.39069	3.20586	0.00601305	0.320177	-2.1209
IMP3	0.61012	6.88966	3.20561	0.00601607	0.320177	-2.12133
TFEB	0.485004	2.61539	3.20421	0.00603318	0.320463	-2.12378
BOLA2	0.70545	5.7476	3.20164	0.00606474	0.320927	-2.12828
CLCN5	0.543271	4.48417	3.19966	0.00608916	0.320927	-2.13174
RPSA	0.80771	7.71795	3.19749	0.00611607	0.320927	-2.13554
PRDX3	0.756782	4.18885	3.19525	0.00614402	0.320927	-2.13946
KCNN1	0.557483	4.83054	3.19464	0.0061516	0.320927	-2.14053
TMEM63B	0.792987	3.54909	3.19334	0.0061679	0.320927	-2.14281
RPS12P31	0.494184	6.27981	3.19187	0.0061863	0.320927	-2.14537
PON1	0.523108	2.29835	3.1886	0.00622748	0.320927	-2.15109
NDUFB4	0.487743	6.80984	3.18833	0.00623092	0.320927	-2.15156
ANP32A	0.568035	5.74025	3.18775	0.00623826	0.320927	-2.15258
REG4	1.57869	3.85905	3.18766	0.00623937	0.320927	-2.15273
USP12	0.54403	3.43366	3.18655	0.0062535	0.320927	-2.15468
DDOST	0.578081	4.93993	3.18289	0.00630016	0.322258	-2.16108
EIF2S2P3	0.564818	5.98091	3.18266	0.00630305	0.322258	-2.16148
NDUFB11	0.476792	5.25576	3.18102	0.00632415	0.322732	-2.16436
XRN2	0.614276	4.27044	3.17901	0.00634998	0.323446	-2.16787
NOA1	0.543306	6.07437	3.17605	0.00638828	0.324187	-2.17305
DRG1	0.987162	5.98252	3.17282	0.00643038	0.324552	-2.17871
GCSH	0.65455	5.12413	3.17226	0.00643764	0.324552	-2.17968
BFAR	0.49797	6.65793	3.17016	0.00646508	0.324552	-2.18334
HSPA8P9	0.567317	3.15885	3.16404	0.00654591	0.32634	-2.19405
PCBD2	0.544956	4.87242	3.16356	0.00655229	0.32634	-2.19488
GJB1	0.832565	5.71868	3.16195	0.00657378	0.32634	-2.19771
SLC5A1	0.514548	4.36908	3.16065	0.0065912	0.326594	-2.19998
PCBD1	0.644049	4.6736	3.15835	0.00662201	0.327109	-2.204
PDRG1	0.461437	4.33406	3.15674	0.00664374	0.327109	-2.20682
DNMBP	0.794286	5.22383	3.15362	0.00668594	0.327703	-2.21228
SUPT4H1	0.484852	5.96008	3.15264	0.00669922	0.327703	-2.21398
KBTBD2	0.560876	2.67419	3.15179	0.00671081	0.327703	-2.21547
MAP7	0.623161	4.70134	3.15099	0.00672163	0.327703	-2.21686
CCDC138	0.586638	4.28751	3.14662	0.00678149	0.328844	-2.2245
SLC27A2	0.659432	3.51942	3.14577	0.0067932	0.328844	-2.22598
CDC25B	0.576696	6.33347	3.14407	0.00681677	0.329401	-2.22897
NOL4L	0.482137	5.20642	3.14232	0.00684092	0.329984	-2.23201
LGALS3	0.683734	6.76887	3.13956	0.00687943	0.330481	-2.23684
SEC61A2	0.581223	3.25403	3.13844	0.00689504	0.330481	-2.2388
MESP2	0.522021	4.3588	3.13526	0.00693974	0.330481	-2.24436
DSPP	0.494431	4.79534	3.13463	0.00694852	0.330481	-2.24545
MMACHC	0.479715	4.8471	3.13146	0.00699341	0.330481	-2.251
DCLRE1B	0.50874	2.90896	3.13102	0.00699967	0.330481	-2.25176
TXNP1	0.606656	5.8986	3.13031	0.00700975	0.330481	-2.253
LSM5	0.652972	5.47466	3.12953	0.00702083	0.330481	-2.25436
PARM1	1.08302	3.33774	3.12869	0.00703279	0.330481	-2.25583
NCR3LG1	0.673252	4.47412	3.12508	0.00708449	0.331246	-2.26214
SPINK1	1.56843	5.3074	3.12299	0.00711453	0.331246	-2.26578
MRPS18A	0.576695	5.9407	3.12248	0.00712188	0.331246	-2.26667
KIF9	0.712829	6.20632	3.12013	0.00715591	0.331899	-2.27077
E2F7	0.58382	5.79724	3.119	0.00717238	0.331899	-2.27275
RPS15AP11	0.587356	6.95644	3.10743	0.00734269	0.338262	-2.29296
C12orf45	0.689553	6.80383	3.10713	0.00734706	0.338262	-2.29347
NSDHL	0.608137	5.62666	3.10417	0.00739129	0.338453	-2.29864
SMIM22	0.522466	7.35306	3.10412	0.00739204	0.338453	-2.29872
CYP2J2	0.734275	4.19724	3.10305	0.00740813	0.338453	-2.30059
SYF2P1	0.557815	2.32296	3.10293	0.00740997	0.338453	-2.30081
CADPS	0.637053	2.63518	3.09653	0.00750669	0.339812	-2.31197
CSE1L	0.92631	6.38904	3.09632	0.00750991	0.339812	-2.31234
RPS24	0.536008	10.9295	3.09401	0.00754512	0.339812	-2.31637
GPX2	0.798955	6.5632	3.0934	0.00755457	0.339812	-2.31744
TRIP13	0.536719	3.22131	3.09295	0.00756143	0.339812	-2.31823
CNOT11	0.522908	8.92234	3.09179	0.00757914	0.339812	-2.32024
ME1	0.57129	3.64049	3.0917	0.00758062	0.339812	-2.32041
ATAD2	0.508569	5.63349	3.09075	0.0075952	0.339812	-2.32206
CLDN2	0.620566	4.97683	3.08942	0.00761567	0.339812	-2.32438
CEACAM7	1.14367	3.34689	3.08873	0.00762627	0.339812	-2.32558
ANLN	0.918391	4.96643	3.08851	0.00762977	0.339812	-2.32597
CEACAM6	0.96508	9.08739	3.08422	0.00769633	0.339812	-2.33345
KDELC1P1	0.542349	3.16653	3.08346	0.0077082	0.339812	-2.33477
RPS27L	0.649234	6.82516	3.08192	0.00773238	0.339812	-2.33747
SCARNA14	0.56788	3.94176	3.08126	0.00774269	0.339812	-2.33861
SERPINB6	0.490908	4.18981	3.07953	0.0077699	0.339812	-2.34163
ZNF227	0.754019	3.72085	3.07906	0.0077773	0.339812	-2.34245
POLE2	0.669458	3.6632	3.07827	0.00778975	0.339812	-2.34383
PPIAP26	0.503604	3.77841	3.0743	0.00785255	0.339812	-2.35074
UPF3B	0.600297	3.93991	3.07101	0.00790515	0.34001	-2.35649
COX7B	0.696129	6.6649	3.06891	0.00793886	0.340797	-2.36015
CA1	1.10669	5.22427	3.06623	0.00798201	0.341615	-2.36481
ACAA2	0.590887	5.27253	3.06617	0.00798295	0.341615	-2.36491
LMO7	0.519908	7.00882	3.06536	0.00799603	0.34164	-2.36632
MANSC1	0.741589	3.30384	3.06163	0.00805681	0.342739	-2.37284
SH3BGRL2	0.651219	5.1959	3.06147	0.00805944	0.342739	-2.37312
BOLA3	0.793044	7.25531	3.05941	0.00809311	0.343397	-2.3767
RPL7P25	0.710593	5.78708	3.05614	0.00814681	0.34431	-2.3824
MUC3A	0.880553	6.78343	3.05505	0.0081648	0.344537	-2.38429
KNTC1	0.59654	4.65222	3.05395	0.00818302	0.344773	-2.38621
ZNF268	0.55943	3.74414	3.05141	0.00822525	0.345486	-2.39064
RAPGEF5	0.779071	4.2173	3.05004	0.00824801	0.345838	-2.39302
ADGRG6	0.550159	4.4022	3.04722	0.00829535	0.346085	-2.39794
FAM234A	0.615583	8.01831	3.04689	0.00830088	0.346085	-2.39851
GIPC2	1.01141	7.19384	3.04572	0.00832045	0.346085	-2.40054
RPL7P4	0.53867	3.40945	3.04572	0.00832045	0.346085	-2.40054
CD24	0.685276	7.57153	3.04469	0.00833787	0.346085	-2.40234
LRRC31	1.07861	3.198	3.04381	0.00835277	0.346085	-2.40387
RPL21P119	0.589268	9.7136	3.04307	0.00836529	0.346085	-2.40516
TMEM126A	0.677784	5.63805	3.04235	0.00837753	0.346085	-2.40642
FXYD3	0.860788	6.28543	3.04226	0.00837896	0.346085	-2.40657
CH507-145C22.1	0.521233	3.00563	3.03935	0.00842856	0.347381	-2.41165
MYB	0.960681	4.776	3.03863	0.00844071	0.347381	-2.41288
DSG2	0.656054	4.43147	3.03778	0.00845534	0.347381	-2.41437
OLA1	0.753374	5.70218	3.03736	0.00846247	0.347381	-2.4151
HDHD2	0.722571	2.40539	3.03668	0.00847411	0.347381	-2.41628
MRPL48	0.719402	6.26302	3.03556	0.00849333	0.347381	-2.41823
OTUB1	0.597854	4.06337	3.03521	0.00849939	0.347381	-2.41884
TATDN1	0.751601	4.283	3.03427	0.0085156	0.347523	-2.42048
APH1A	0.579853	5.52149	3.03278	0.00854131	0.348052	-2.42308
ADAT2	0.699299	5.76267	3.02741	0.00863468	0.350288	-2.43243
TBX3	0.796236	6.03832	3.02587	0.00866157	0.35032	-2.4351
CCNB1	0.576273	4.29377	3.0218	0.00873319	0.35032	-2.44218
HSD17B12	0.705321	6.08451	3.02054	0.00875542	0.35032	-2.44437
COPS3	0.621625	5.98656	3.02019	0.00876162	0.35032	-2.44498
SMAGP	0.797896	5.46119	3.01993	0.00876621	0.35032	-2.44543
CEACAM5	0.881801	8.29815	3.01712	0.00881621	0.350955	-2.45032
COMMD9	0.512145	3.76773	3.01177	0.00891204	0.352407	-2.45961
RPL26	0.553905	7.96798	3.01035	0.00893767	0.352407	-2.46208
CTAGE9	0.738394	4.30865	3.00951	0.00895299	0.352407	-2.46356
OR1S1	0.553722	2.58764	3.00932	0.0089564	0.352407	-2.46388
SRF	0.626461	4.1863	3.00613	0.0090143	0.353222	-2.46942
ABCE1	0.654656	4.14292	3.00594	0.00901785	0.353222	-2.46976
TMEM191C	0.779537	3.33309	3.00525	0.00903043	0.353222	-2.47096
UBE2T	0.841506	4.57886	3.00446	0.00904489	0.353281	-2.47234
GFPT1	0.625249	6.21522	3.00163	0.00909664	0.353804	-2.47724
RPS15	0.607125	6.28826	2.99803	0.00916324	0.355362	-2.48351
IGF2BP3	0.761562	2.81351	2.99612	0.00919857	0.356004	-2.48682
SLC25A3	0.601673	6.684	2.99573	0.00920587	0.356004	-2.4875
GGCT	0.589383	6.0983	2.99302	0.00925637	0.356318	-2.49221
SLC26A3	1.37631	6.12797	2.99288	0.00925894	0.356318	-2.49245
EIF5B	0.685026	7.22375	2.99193	0.00927684	0.356318	-2.49411
ISY1	0.428459	3.25866	2.98994	0.00931424	0.356318	-2.49756
RPSAP3	0.689566	4.42093	2.98865	0.00933843	0.356318	-2.49979
ZNF670	0.464374	4.05883	2.98816	0.00934779	0.356318	-2.50065
PI3	0.94775	5.76851	2.98721	0.00936563	0.356318	-2.50229
STMN1	0.487851	6.20846	2.98601	0.0093885	0.356318	-2.50439
RBM47	0.52874	5.32864	2.98589	0.00939065	0.356318	-2.50459
PDIA4	0.573141	4.76869	2.98519	0.00940398	0.356318	-2.50581
CENPU	0.446947	3.82192	2.98434	0.00942011	0.356318	-2.50728
CDK1	0.625905	3.70154	2.98427	0.00942155	0.356318	-2.50741
NDUFB5	0.627552	4.71899	2.98388	0.00942894	0.356318	-2.50808
NXT1P1	0.476847	5.9499	2.98346	0.0094369	0.356318	-2.50881
AIMP2	0.481925	4.88515	2.9826	0.00945338	0.356318	-2.51031
ARHGEF38	0.599201	6.14595	2.97885	0.00952516	0.356318	-2.51681
KRT18P53	0.775725	6.64288	2.97727	0.00955569	0.356318	-2.51956
PRELID2	0.53615	4.44188	2.97658	0.00956906	0.356318	-2.52076
PCTP	0.602807	4.91746	2.97513	0.00959705	0.356318	-2.52327
RPL34P21	0.472208	5.88738	2.97501	0.00959933	0.356318	-2.52348
TOX3	0.63332	5.72486	2.97486	0.00960234	0.356318	-2.52375
SMAD2	0.585964	5.27229	2.97469	0.00960552	0.356318	-2.52403
GAPDHP60	0.584276	5.29248	2.97164	0.00966497	0.356518	-2.52933
SKP2	0.586652	3.76339	2.96594	0.00977674	0.356518	-2.53921
HHLA2	0.995026	2.96491	2.9659	0.00977754	0.356518	-2.53928
RPL35AP4	0.657952	7.74229	2.96576	0.00978048	0.356518	-2.53954
CANX	0.759659	9.29272	2.9641	0.00981324	0.356518	-2.54241
RPL13AP7	0.478691	7.51559	2.96362	0.00982274	0.356518	-2.54325
IL13RA1	0.669404	4.84712	2.96362	0.00982278	0.356518	-2.54325
TMEM14A	0.526901	3.98496	2.96173	0.00986021	0.356518	-2.54652
NOLC1	0.481843	6.00595	2.96099	0.00987494	0.356518	-2.5478
CD2AP	0.615133	6.03969	2.95994	0.00989602	0.356518	-2.54963
NF1	0.59823	3.76434	2.95948	0.00990521	0.356518	-2.55043
GPT2	0.575398	3.34016	2.95915	0.00991183	0.356518	-2.551
RPL7AP66	0.48886	5.28258	2.95735	0.00994794	0.356518	-2.55413
GTPBP4	0.474441	4.76943	2.95722	0.00995045	0.356518	-2.55434
PPIAL4F	0.500754	8.99464	2.95598	0.00997542	0.35678	-2.5565
ZNF678	0.468315	4.93028	2.95556	0.00998388	0.35678	-2.55723
FAM122B	0.56042	4.43244	2.95474	0.0100003	0.3569	-2.55864
RPL23AP63	0.480006	5.96823	2.95262	0.0100433	0.357093	-2.56232
PROM1	0.827383	6.09923	2.95254	0.010045	0.357093	-2.56247
RPL6P30	0.428441	6.27202	2.95139	0.0100683	0.357456	-2.56446
ACAD11	0.504229	1.97306	2.95003	0.0100959	0.357973	-2.56681
PDCD2L	0.625966	5.44858	2.94564	0.0101857	0.360026	-2.57441
HMGCS2	1.15894	4.97679	2.94531	0.0101925	0.360026	-2.57499
NOSTRIN	0.633193	4.34566	2.94475	0.0102041	0.360026	-2.57597
CEP128	0.450719	2.79332	2.94454	0.0102082	0.360026	-2.57632
ORC1	0.537713	2.63994	2.94306	0.0102389	0.360235	-2.57889
LSG1	0.607608	5.60932	2.94074	0.0102869	0.360686	-2.58291
ERBB3	0.826035	7.03511	2.93652	0.0103749	0.361049	-2.59023
RPS2P5	0.672074	7.40299	2.93472	0.0104125	0.361049	-2.59333
RPL36AP53	0.437677	4.73971	2.93463	0.0104144	0.361049	-2.59349
LRPPRC	0.586611	9.39275	2.92962	0.0105202	0.363112	-2.60216
TMCC1	0.573713	4.28825	2.92671	0.0105821	0.36433	-2.60721
IDH1	0.446429	6.0419	2.92368	0.0106469	0.364721	-2.61245
PDHA1	0.565607	4.12184	2.92165	0.0106906	0.365512	-2.61596
PRR13	0.527977	7.90704	2.92136	0.0106968	0.365512	-2.61646
URB1-AS1	0.415023	3.97138	2.91928	0.0107417	0.366588	-2.62006
ZNF614	0.522917	3.05137	2.91602	0.0108126	0.367772	-2.6257
SSRP1	0.53861	4.65167	2.91519	0.0108307	0.367772	-2.62714
SERPINB1	0.648415	5.28919	2.91452	0.0108453	0.367772	-2.6283
ARL1	0.687825	4.67436	2.913	0.0108785	0.367772	-2.63092
AHSA1	0.745766	4.72662	2.91139	0.0109139	0.367772	-2.63371
RPS15AP17	0.673325	6.37742	2.91119	0.0109183	0.367772	-2.63406
SLC39A2	0.43794	2.80004	2.91069	0.0109293	0.367772	-2.63492
HSP90AA1	0.775358	6.20183	2.90964	0.0109525	0.367772	-2.63674
FASTKD1	0.630092	2.70286	2.90889	0.010969	0.367772	-2.63803
BIRC6	0.473741	6.24158	2.90191	0.0111242	0.369622	-2.65009
TAF1D	0.747896	6.84271	2.90138	0.0111361	0.369622	-2.65101
GLRX3	0.474189	4.93083	2.90079	0.0111493	0.369622	-2.65203
SPICE1	0.615551	4.72447	2.90052	0.0111555	0.369622	-2.6525
MYO5C	0.474561	6.03159	2.89769	0.0112192	0.369934	-2.65739
TFF2	0.743642	4.34885	2.89529	0.0112735	0.370279	-2.66153
UQCRH	0.84544	6.84994	2.89317	0.0113217	0.370279	-2.6652
TMPO	0.526273	3.07237	2.89299	0.0113259	0.370279	-2.66551
RPL29	0.580269	6.62102	2.89159	0.0113578	0.370279	-2.66792
HSPD1P9	0.543551	2.26225	2.89084	0.0113749	0.370279	-2.66922
KRT18P60	0.629305	4.87816	2.88991	0.0113964	0.370279	-2.67084
RPS7P11	0.916662	6.55787	2.88913	0.0114142	0.370279	-2.67217
EZR	0.63133	6.3261	2.88706	0.0114619	0.370279	-2.67575
TMPRSS4	0.775666	5.01339	2.88695	0.0114644	0.370279	-2.67594
TBL1XR1	0.473961	6.05441	2.88695	0.0114644	0.370279	-2.67594
EIF3E	0.704336	6.15465	2.88651	0.0114745	0.370279	-2.67669
GINS1	0.476613	2.76403	2.88528	0.0115031	0.370279	-2.67883
TOMM7	0.677094	7.38756	2.885	0.0115094	0.370279	-2.6793
TMEM183A	0.529529	4.77967	2.88479	0.0115144	0.370279	-2.67967
PSMG1	0.720663	5.77526	2.88369	0.0115399	0.370279	-2.68157
A1CF	0.95726	3.5478	2.87998	0.0116262	0.371237	-2.68797
TMEM68	0.558974	3.16263	2.87951	0.0116374	0.371237	-2.68879
PSMA6P2	0.610387	3.4881	2.87942	0.0116394	0.371237	-2.68894
CALR	0.503084	5.99455	2.87655	0.0117068	0.372953	-2.69389
CKS2	0.870295	5.35991	2.87314	0.0117874	0.374645	-2.69978
SNORD102	0.508596	9.20464	2.87051	0.0118499	0.376192	-2.70431
CYP51A1	0.577908	6.30945	2.86983	0.0118662	0.376273	-2.70549
CDC27	0.681064	5.96573	2.8687	0.0118932	0.37669	-2.70744
ATP2A1-AS1	0.494961	5.53392	2.86676	0.0119397	0.377564	-2.71079
MRPL51	0.506455	7.75875	2.86543	0.0119715	0.377564	-2.71307
STARD10	0.957102	6.81661	2.86439	0.0119967	0.377564	-2.71487
ADGRL3-AS1	0.651159	3.07925	2.86397	0.0120067	0.377564	-2.71558
GEMIN6	0.566659	5.62066	2.86225	0.0120483	0.377564	-2.71855
HSPH1	0.666076	6.14682	2.86224	0.0120487	0.377564	-2.71858
UQCRQ	0.701775	9.84236	2.85896	0.0121283	0.378296	-2.72423
CLNS1A	0.503505	8.63982	2.85777	0.0121575	0.378296	-2.72628
MAPK9	0.528508	4.33398	2.85757	0.0121622	0.378296	-2.72662
RPL7P8	0.447823	3.37511	2.85356	0.0122607	0.378296	-2.73354
SHCBP1	0.857538	4.18471	2.8524	0.0122893	0.378296	-2.73553
MS4A12	0.692775	3.85866	2.85228	0.0122923	0.378296	-2.73574
WNT5A	0.704727	3.60839	2.84992	0.0123507	0.378296	-2.7398
PLEKHH1	1.04824	7.7003	2.84952	0.0123607	0.378296	-2.7405
AP2B1	0.612688	7.31799	2.84854	0.0123851	0.378296	-2.74219
MEP1A	0.923638	3.54946	2.848	0.0123984	0.378296	-2.74311
ELOVL6	0.82458	4.48742	2.84691	0.0124255	0.378296	-2.74498
RPS8	0.747339	10.3434	2.84684	0.0124275	0.378296	-2.74511
PTBP1	0.575606	4.73279	2.84682	0.0124277	0.378296	-2.74513
GDA	0.915836	4.1745	2.84678	0.0124288	0.378296	-2.74521
MUC17	0.72319	3.67095	2.84355	0.0125098	0.379491	-2.75077
ZNF280B	0.674739	3.76301	2.84141	0.0125635	0.379874	-2.75445
MRPS22	0.593912	5.40005	2.84009	0.0125969	0.379874	-2.75672
BCCIP	0.505431	5.92134	2.83885	0.0126284	0.380132	-2.75886
CBR4	0.45669	3.78779	2.83605	0.0126995	0.3809	-2.76368
RPS24P8	0.531654	5.50872	2.83538	0.0127166	0.3809	-2.76483
GCC2	0.736873	5.82452	2.83412	0.012749	0.3809	-2.76701
RPS5	0.561041	8.41851	2.83358	0.0127628	0.3809	-2.76793
GSG1	0.441713	3.62466	2.83325	0.012771	0.3809	-2.76849
RAD51AP1	0.734764	3.54771	2.83229	0.0127957	0.3809	-2.77014
MEMO1	0.567252	3.82894	2.83192	0.0128053	0.3809	-2.77078
AVL9	0.616549	6.40164	2.83157	0.0128144	0.3809	-2.77139
MUC20P1	0.455336	6.8822	2.83083	0.0128334	0.3809	-2.77266
FGGY	0.530442	3.20263	2.83041	0.0128441	0.3809	-2.77338
RPS26P43	0.571429	5.87758	2.82855	0.0128923	0.3809	-2.77659
SNORD56	0.998986	4.70941	2.82834	0.0128978	0.3809	-2.77695
PBK	0.417109	2.21011	2.82806	0.012905	0.3809	-2.77743
TMX3	0.641365	3.43149	2.82702	0.0129318	0.381278	-2.77921
MED28	0.517355	3.67249	2.82577	0.0129643	0.381824	-2.78136
FAM98B	0.444912	2.60439	2.82394	0.0130119	0.381991	-2.7845
RPL21P120	0.493049	7.37176	2.82306	0.013035	0.382258	-2.78602
AOC1	0.497817	4.60811	2.82047	0.0131028	0.383675	-2.79046
RPLP0P6	0.446091	8.50704	2.81988	0.0131186	0.383675	-2.79149
PPIA	0.625221	6.67827	2.81787	0.0131715	0.384608	-2.79494
UNC5D	0.463628	2.24753	2.8162	0.0132158	0.385347	-2.79782
MAP2K2	0.489455	6.38402	2.81585	0.013225	0.385347	-2.79842
BOLA2P1	0.430925	6.42993	2.81418	0.0132695	0.385817	-2.80129
RPL23AP26	0.436008	3.15321	2.8134	0.0132901	0.386008	-2.80262
RPL36A	0.874626	8.58945	2.81037	0.0133712	0.3874	-2.80783
TIPIN	0.440968	3.76359	2.81024	0.0133746	0.3874	-2.80805
NCAPD2	0.618211	3.64483	2.80892	0.0134099	0.387427	-2.81031
RPLP0	0.489801	8.8118	2.80702	0.0134613	0.387659	-2.81358
RNF138P2	0.477445	3.1882	2.80599	0.013489	0.387659	-2.81534
NFX1	0.459913	6.42087	2.80346	0.0135576	0.387997	-2.81968
ATAD5	0.464503	2.28629	2.80283	0.0135747	0.38808	-2.82076
TRIM15	1.01626	2.98405	2.79979	0.0136576	0.389634	-2.82598
HADH	0.706712	3.7209	2.79504	0.0137883	0.392953	-2.83413
FABP5P10	0.520616	4.63991	2.79358	0.0138287	0.393692	-2.83664
C1QBP	0.414639	5.31387	2.79173	0.01388	0.394329	-2.83981
NBN	0.431855	3.70707	2.78983	0.0139329	0.394329	-2.84306
YWHAQP7	0.484484	2.20113	2.78966	0.0139377	0.394329	-2.84336
RPS3AP35	0.515935	2.27765	2.78552	0.0140537	0.395675	-2.85045
DAD1	0.759235	7.45673	2.78526	0.0140611	0.395675	-2.8509
AFMID	0.606197	5.3105	2.78494	0.01407	0.395675	-2.85144
RPN2	0.489555	7.22606	2.78455	0.0140811	0.395675	-2.85212
C19orf53	0.562138	6.2703	2.78421	0.0140906	0.395675	-2.85269
EIF3M	0.829291	4.51345	2.78367	0.0141058	0.395675	-2.85362
PGAM5	0.551924	4.10872	2.7785	0.0142528	0.395675	-2.86249
FAM111B	0.669423	3.24921	2.77847	0.0142536	0.395675	-2.86254
FOXM1	0.506906	4.12475	2.77817	0.014262	0.395675	-2.86304
DCLRE1A	0.50431	3.16765	2.77507	0.0143509	0.395675	-2.86836
AMD1	0.588501	5.29167	2.77151	0.0144535	0.395675	-2.87445
HNRNPA1	0.503205	8.82388	2.7712	0.0144626	0.395675	-2.87499
PPIAP31	0.611197	4.06269	2.77059	0.0144802	0.395675	-2.87604
CDK7	0.662782	7.96984	2.77029	0.0144888	0.395675	-2.87654
EZH2	0.762031	6.6808	2.77022	0.0144909	0.395675	-2.87667
RPS6P25	0.491986	5.26322	2.76984	0.014502	0.395675	-2.87732
RPL23AP86	0.689524	5.1831	2.76915	0.0145219	0.395675	-2.87849
IPO11	0.5419	4.039	2.7689	0.0145291	0.395675	-2.87892
NDUFAB1	0.587986	5.00436	2.76849	0.014541	0.395675	-2.87962
LARP1B	0.470181	5.82428	2.76842	0.0145432	0.395675	-2.87975
CMTM8	0.44451	4.49729	2.76783	0.0145603	0.395675	-2.88076
ANKRD18A	0.506004	3.61629	2.76599	0.0146141	0.395675	-2.88391
ZXDC	0.42153	3.90314	2.76578	0.0146201	0.395675	-2.88426
TMEM69	0.815866	3.83184	2.76556	0.0146265	0.395675	-2.88463
SLC24A4	0.504314	3.42453	2.76476	0.0146501	0.395675	-2.88601
CCT6P2	0.462589	2.97851	2.76459	0.0146549	0.395675	-2.8863
PEX26	0.428657	5.90261	2.76388	0.0146757	0.395675	-2.8875
GMNN	0.621	2.87009	2.76351	0.0146868	0.395675	-2.88815
ASS1	0.613066	5.4227	2.76306	0.0146998	0.395675	-2.88891
MTIF2	0.563372	2.87751	2.76296	0.0147028	0.395675	-2.88908
CHRNA5	0.720946	3.54452	2.76224	0.014724	0.395675	-2.89032
RPL11	0.666055	9.30202	2.7619	0.0147339	0.395675	-2.8909
RPS29	0.834586	10.1954	2.76077	0.0147674	0.395675	-2.89284
RPS23P8	0.933445	9.40016	2.75989	0.0147932	0.395675	-2.89433
GART	0.469817	6.31806	2.75959	0.0148024	0.395675	-2.89486
MARCKSL1	0.421256	6.73375	2.75795	0.0148509	0.395675	-2.89766
CYTB	0.539994	11.1973	2.75668	0.0148887	0.395675	-2.89983
UBE2L4	0.542216	5.58547	2.75659	0.0148912	0.395675	-2.89998
RPL37P25	0.437906	4.41647	2.75594	0.0149108	0.395675	-2.9011
LYSMD1	0.409698	4.31053	2.7549	0.0149418	0.395675	-2.90287
TNNI1	0.393518	4.07902	2.75335	0.0149882	0.396134	-2.90552
TDP2	0.579891	4.81749	2.75001	0.0150886	0.396519	-2.91123
MKKS	0.471417	2.56259	2.74961	0.0151006	0.396519	-2.91192
TBL2	0.465819	6.10625	2.74735	0.015169	0.39745	-2.91578
RPL39P3	0.781459	8.92571	2.74363	0.0152821	0.399091	-2.92213
LIPH	0.771272	5.27919	2.74293	0.0153035	0.399091	-2.92332
KLHL23	0.709578	3.85374	2.74109	0.0153598	0.399091	-2.92647
FH	0.408192	3.39153	2.74098	0.0153632	0.399091	-2.92665
SNORA22	0.623767	2.76617	2.73956	0.0154066	0.399461	-2.92907
ITM2C	0.695297	8.19361	2.73786	0.0154591	0.400061	-2.93197
FAM72C	0.533873	3.45573	2.73551	0.0155318	0.400321	-2.93598
RASGEF1A	0.515685	4.23193	2.7348	0.0155538	0.400321	-2.9372
ADGRG1	0.695665	5.06317	2.73048	0.0156886	0.402567	-2.94457
ALG8	0.596673	3.09263	2.72942	0.0157218	0.403038	-2.94637
COX11	0.618031	4.49311	2.72777	0.0157737	0.403221	-2.94919
KCNQ1OT1	0.555073	5.44918	2.72735	0.0157871	0.403221	-2.94992
SPATA25	0.650203	4.05062	2.72696	0.0157992	0.403221	-2.95057
C11orf98	0.472075	6.67158	2.7267	0.0158076	0.403221	-2.95102
POLR2H	0.514494	6.98599	2.72452	0.0158763	0.403891	-2.95473
COX17P1	0.413507	5.50582	2.72415	0.0158882	0.403891	-2.95537
MTND4LP30	0.632454	8.1488	2.72215	0.0159516	0.404525	-2.95877
GAPDHP71	0.465868	4.03783	2.72196	0.0159577	0.404525	-2.9591
RPL37P1	0.450041	4.40209	2.7215	0.0159724	0.404525	-2.95989
FBL	0.579287	7.23553	2.71898	0.0160529	0.406188	-2.96418
GAPDH	0.581997	8.32497	2.71846	0.0160694	0.406229	-2.96506
KIF11	0.516399	3.07005	2.71733	0.0161056	0.406768	-2.96698
SLC3A1	0.827131	3.52306	2.71597	0.0161496	0.40746	-2.96931
DSG3	0.681483	4.28199	2.71555	0.0161629	0.40746	-2.97001
PRSS12	0.521708	4.98169	2.71472	0.0161899	0.407523	-2.97144
RPS21P4	0.772698	8.18491	2.71396	0.0162143	0.407626	-2.97273
COMMD6	0.627624	6.38426	2.71263	0.0162574	0.407756	-2.97499
ACE2	1.24748	3.33072	2.71129	0.016301	0.407933	-2.97728
PI4KA	0.731185	4.68656	2.71128	0.0163012	0.407933	-2.97729
NOP56	0.778955	6.76218	2.70957	0.0163569	0.408	-2.98021
SNORD104	0.760221	7.02643	2.70741	0.0164275	0.408	-2.98389
RPL7A	0.578571	9.21187	2.70671	0.0164505	0.408	-2.98508
USP41	0.509085	5.25661	2.70659	0.0164545	0.408	-2.98528
ST14	0.579811	7.13544	2.70562	0.0164861	0.408	-2.98692
AADAT	0.856938	4.27245	2.70543	0.0164925	0.408	-2.98725
LYRM1	0.482648	4.67115	2.70428	0.0165304	0.408058	-2.98921
MYCN	0.493414	3.9638	2.70369	0.0165496	0.408165	-2.99021
SEPHS2	0.422597	5.03137	2.70277	0.0165801	0.408485	-2.99178
TJAP1	0.555209	2.74496	2.70093	0.016641	0.408485	-2.99491
SNORD3B-2	0.487333	8.22074	2.70059	0.0166523	0.408485	-2.99549
RPS18	0.533695	10.0497	2.70053	0.0166545	0.408485	-2.9956
EEF1B2P3	0.736006	9.05069	2.7005	0.0166552	0.408485	-2.99564
PSMA2	0.572165	4.67965	2.70043	0.0166578	0.408485	-2.99577
RPS6P7	0.471368	2.87802	2.69907	0.0167029	0.408485	-2.99808
SLC38A5	0.768579	5.04999	2.69887	0.0167095	0.408485	-2.99842
PAPOLA	0.726116	5.60538	2.69858	0.0167192	0.408485	-2.99891
NCLN	0.56122	4.62047	2.69778	0.0167457	0.408485	-3.00026
EIF2A	0.528305	3.91541	2.69746	0.0167566	0.408485	-3.00082
FRK	0.568514	4.91874	2.69702	0.0167711	0.408485	-3.00156
AKR1A1	0.477686	5.04851	2.69699	0.0167721	0.408485	-3.00161
PDE3B	0.459222	4.63532	2.69597	0.0168062	0.40895	-3.00334
RPLP2	0.654739	10.657	2.69308	0.0169033	0.410222	-3.00826
PER2	0.418842	4.79338	2.69306	0.0169041	0.410222	-3.0083
TIMM8BP1	0.512513	5.495	2.69248	0.0169235	0.410222	-3.00928
CDK10	0.460251	3.77063	2.69103	0.0169723	0.410796	-3.01174
STK26	0.573982	6.00714	2.69045	0.0169922	0.410912	-3.01274
PUM3	0.566648	5.36416	2.68944	0.0170262	0.411371	-3.01444
NDUFV2	0.402402	4.58006	2.68736	0.0170969	0.412153	-3.01798
TRAJ8	0.574256	4.29019	2.68583	0.0171491	0.412809	-3.02058
PABPC1P1	0.595913	5.54092	2.68457	0.0171922	0.412809	-3.02272
RPL9P18	0.509911	5.70116	2.68454	0.0171931	0.412809	-3.02277
NOL11	0.552717	5.18422	2.68442	0.0171971	0.412809	-3.02297
C2CD5	0.72592	4.72336	2.68414	0.0172067	0.412809	-3.02344
RPL7P36	0.540965	3.40655	2.67882	0.0173901	0.415385	-3.03249
TIMM9	0.585657	4.61064	2.67645	0.0174721	0.416143	-3.0365
RPL27A	0.464639	7.40657	2.67614	0.0174828	0.416143	-3.03702
TMEM59	0.513953	4.32248	2.67295	0.0175943	0.418432	-3.04245
ABCC6	0.441325	5.44516	2.6721	0.0176239	0.418543	-3.04388
LSM3	0.586793	3.55336	2.6714	0.0176484	0.418543	-3.04507
RPL15P2	0.537221	2.58463	2.67116	0.0176571	0.418543	-3.04549
OR1A2	0.484099	2.59332	2.67023	0.0176895	0.418871	-3.04705
CKAP2	0.633041	4.36451	2.66824	0.0177597	0.42017	-3.05043
COX1	0.512248	11.2341	2.66626	0.01783	0.420625	-3.0538
CASC9	0.721166	2.88836	2.66597	0.0178402	0.420625	-3.05428
CKS1B	0.68139	7.84147	2.66596	0.0178406	0.420625	-3.0543
CDC6	0.481035	4.76375	2.6648	0.0178816	0.420775	-3.05626
TMCO1	0.51017	6.61467	2.66479	0.0178819	0.420775	-3.05627
FABP2	0.645603	3.34348	2.66378	0.0179179	0.420775	-3.05799
PBDC1	0.418238	6.06077	2.66326	0.0179365	0.420775	-3.05888
NOL10	0.483629	5.22994	2.66317	0.0179395	0.420775	-3.05902
RPL7P23	0.489758	6.55969	2.66247	0.0179645	0.420775	-3.06021
RPS15AP38	0.594948	5.82032	2.66247	0.0179648	0.420775	-3.06022
RPL35AP33	0.499801	5.64752	2.66199	0.017982	0.420775	-3.06103
GLCE	0.45441	4.939	2.66088	0.0180216	0.420975	-3.06291
CENPV	0.454929	4.14154	2.66078	0.018025	0.420975	-3.06307
PDIA6	0.688016	6.02489	2.65767	0.0181367	0.423221	-3.06834
CCL24	0.743146	5.32974	2.65444	0.0182537	0.423866	-3.07382
KIAA1804	0.588696	2.89309	2.65311	0.0183019	0.423866	-3.07607
TLK1	0.495575	3.60076	2.65307	0.0183033	0.423866	-3.07614
NDUFB9	0.691063	6.92564	2.65195	0.018344	0.423866	-3.07803
RAC1	0.531653	9.56512	2.65184	0.0183481	0.423866	-3.07822
ZNF215	0.396416	3.78019	2.65152	0.0183598	0.423866	-3.07876
RBM41	0.409533	4.08024	2.64926	0.0184422	0.424584	-3.08258
FAM83B	0.740058	3.22593	2.64922	0.0184439	0.424584	-3.08266
GALK2	0.557637	3.88087	2.64854	0.0184686	0.424794	-3.0838
PSMC1	0.562267	4.21501	2.64804	0.018487	0.424858	-3.08464
AKR1C4	0.43759	2.75405	2.64621	0.0185543	0.42569	-3.08774
RPSAP12	0.590605	5.362	2.64564	0.0185752	0.42581	-3.0887
TRMT10C	0.476896	2.64438	2.64385	0.0186414	0.426052	-3.09173
PRC1	0.521876	6.03995	2.64369	0.0186472	0.426052	-3.092
RYK	0.674879	5.05041	2.64367	0.0186482	0.426052	-3.09204
NSUN6	0.44556	3.97133	2.64277	0.0186813	0.426453	-3.09356
KIF1C	0.476095	3.77723	2.64214	0.0187048	0.426633	-3.09463
CDC123	0.624999	5.24665	2.64166	0.0187227	0.426683	-3.09544
DCAF17	0.572522	2.90982	2.64022	0.0187763	0.427497	-3.09788
RPL21P7	0.41038	5.09849	2.63978	0.0187928	0.427497	-3.09863
CD24P4	0.425978	7.88573	2.63863	0.0188355	0.427497	-3.10056
PAICSP5	0.467735	3.01616	2.63855	0.0188385	0.427497	-3.10069
MTCO3P12	0.546548	9.69729	2.6378	0.0188666	0.427497	-3.10196
S100A3	0.542779	5.9813	2.63589	0.0189384	0.428381	-3.1052
MLEC	0.638843	7.56252	2.63371	0.0190202	0.429395	-3.10887
CS	0.734991	5.86639	2.63344	0.0190304	0.429395	-3.10933
AGPAT5	0.575828	4.9811	2.63047	0.0191428	0.430299	-3.11435
RPL39	0.660802	10.2244	2.63038	0.0191462	0.430299	-3.1145
SLC39A8	0.498529	5.67502	2.6289	0.0192025	0.430787	-3.117
COX6A1	0.488977	6.12611	2.62635	0.0193	0.430811	-3.12131
PPP1CC	0.548126	4.55147	2.62618	0.0193066	0.430811	-3.1216
GAS5	0.636042	6.69617	2.62535	0.0193381	0.430811	-3.12299
PGAM1	0.540627	5.59949	2.62518	0.0193447	0.430811	-3.12328
MTCO2P2	0.520013	8.54306	2.62501	0.0193511	0.430811	-3.12356
SNHG19	0.634906	6.04847	2.62384	0.0193963	0.430811	-3.12555
VDAC1	0.475754	5.42966	2.62344	0.0194117	0.430811	-3.12622
RPL35A	0.549022	11.8725	2.62284	0.0194347	0.430811	-3.12723
UQCRC2	0.564611	6.49313	2.62276	0.0194377	0.430811	-3.12736
RPL7L1	0.454691	3.69055	2.62161	0.0194821	0.430811	-3.12931
SLC15A1	0.732193	3.59112	2.6207	0.0195173	0.430811	-3.13085
FANCL	0.401129	4.75133	2.6202	0.0195366	0.430811	-3.13169
DENND1B	0.822968	3.63674	2.61984	0.0195506	0.430811	-3.13229
TPMT	0.411907	5.2747	2.61901	0.0195827	0.430811	-3.13369
DDRGK1	0.572659	4.06877	2.61895	0.019585	0.430811	-3.13379
RPS27AP1	0.478532	5.75432	2.61857	0.0195997	0.430811	-3.13443
RPL3P3	0.4436	4.28845	2.61719	0.0196535	0.430811	-3.13676
CEACAM1	0.870278	5.50131	2.61716	0.0196548	0.430811	-3.13682
YWHAZP2	0.518977	4.63007	2.6168	0.0196688	0.430811	-3.13743
TPRA1	0.42304	4.08305	2.6162	0.0196922	0.430811	-3.13844
PFDN4	0.846721	6.25825	2.61618	0.0196928	0.430811	-3.13846
HOXA13	0.770631	3.78082	2.61472	0.0197498	0.431368	-3.14093
RPL7P47	0.538997	6.16838	2.61217	0.0198497	0.43226	-3.14522
MRPL30	0.544902	4.77526	2.61145	0.0198781	0.43244	-3.14644
MELK	0.500947	4.13349	2.60976	0.0199447	0.433198	-3.14928
KRT18P16	0.489462	5.94786	2.60894	0.0199771	0.433558	-3.15067
CGN	0.475729	3.54774	2.60777	0.0200235	0.433782	-3.15264
KIF20B	0.514479	3.86799	2.60635	0.0200799	0.433782	-3.15503
GSR	0.606895	6.69327	2.60614	0.0200883	0.433782	-3.15539
DRAIC	0.492805	2.26963	2.60496	0.0201353	0.433782	-3.15738
FAR2P1	0.60071	3.12395	2.60476	0.0201433	0.433782	-3.15772
SNORD87	0.516169	9.85222	2.60468	0.0201464	0.433782	-3.15784
INTS12	0.711651	5.21748	2.60289	0.0202179	0.43498	-3.16086
TTF2	0.729795	4.17732	2.60115	0.0202878	0.435748	-3.1638
SNORA24	0.634864	7.98403	2.60098	0.0202946	0.435748	-3.16408
VPS37B	0.457387	5.33759	2.60055	0.0203117	0.435748	-3.1648
LMTK2	0.489716	6.01959	2.60041	0.0203174	0.435748	-3.16504
LIMS1	0.428734	2.87422	2.5996	0.0203501	0.436106	-3.16641
MYL10	0.436872	2.05907	2.59858	0.0203912	0.436509	-3.16812
RPS7	0.477652	9.37441	2.59834	0.0204009	0.436509	-3.16853
ATP2C2	0.523435	5.52444	2.59562	0.0205107	0.436634	-3.17309
BCO2	0.421038	2.14098	2.5952	0.0205277	0.436634	-3.1738
ITFG1	0.429636	6.51178	2.59393	0.0205796	0.436634	-3.17594
SLC37A4	0.435222	5.34538	2.59261	0.0206333	0.436634	-3.17816
TCEA1P2	0.577107	5.30399	2.59253	0.0206366	0.436634	-3.1783
SAXO1	0.391462	2.82049	2.59238	0.0206428	0.436634	-3.17855
RPL30P4	0.805363	6.04616	2.59189	0.0206627	0.436634	-3.17937
ARF6	0.585907	6.26001	2.5897	0.0207524	0.437287	-3.18306
SNORD12C	0.649072	8.81918	2.5887	0.0207932	0.437287	-3.18473
RPL39P38	0.488705	6.19124	2.5887	0.0207933	0.437287	-3.18473
RPL3P6	0.412619	4.9256	2.58798	0.0208229	0.437287	-3.18594
SPTSSA	0.431296	6.09051	2.58762	0.0208377	0.437287	-3.18654
PRSS8	0.515308	5.45377	2.58622	0.0208955	0.438164	-3.1889
PRPSAP2	0.586201	5.07983	2.58531	0.0209333	0.438619	-3.19044
SLC8A3	0.43967	3.39154	2.58457	0.0209637	0.438918	-3.19167
CHCHD3P3	0.430653	3.89746	2.58253	0.0210486	0.44036	-3.19511
BCL10	0.573336	4.51331	2.58116	0.0211054	0.441204	-3.1974
COX7C	0.521662	10.4173	2.58013	0.0211484	0.441204	-3.19913
MAP3K13	0.512786	4.751	2.58008	0.0211508	0.441204	-3.19922
AOAH-IT1	0.47368	2.26606	2.57824	0.0212276	0.441922	-3.20231
MALSU1	0.523358	5.61223	2.57807	0.0212348	0.441922	-3.20259
C1GALT1	0.405969	3.31084	2.57695	0.0212819	0.441922	-3.20448
ERLIN1	0.585512	6.05336	2.576	0.0213216	0.441922	-3.20606
USP44	0.569609	2.44542	2.57566	0.0213359	0.441922	-3.20663
UQCC1	0.462114	5.12355	2.57562	0.0213378	0.441922	-3.20671
MCTS1	0.477853	3.77386	2.57519	0.021356	0.441922	-3.20743
RPL24	0.485347	9.59304	2.57513	0.0213583	0.441922	-3.20752
NSUN5P2	0.360851	5.97526	2.57495	0.0213661	0.441922	-3.20783
PHKA2	0.470434	4.1891	2.57408	0.0214029	0.441999	-3.20929
NDUFC2-KCTD14	0.45379	6.7048	2.57371	0.0214184	0.441999	-3.20991
CYLC1	0.399281	1.92752	2.57205	0.0214886	0.442918	-3.21269
ZNF639	0.582949	3.94267	2.56987	0.0215815	0.443836	-3.21635
NPM1	0.500251	5.61069	2.5697	0.0215887	0.443836	-3.21664
NCKIPSD	0.422342	4.81127	2.56827	0.0216496	0.44452	-3.21903
SPCS1	0.656413	4.91739	2.56654	0.0217238	0.44452	-3.22194
YEATS4	0.58842	5.38388	2.56464	0.0218052	0.44452	-3.22512
ZFAND2B	0.373519	3.72847	2.56442	0.0218146	0.44452	-3.22548
SEC61G	0.772235	5.67648	2.56412	0.0218275	0.44452	-3.22599
MTCO1P2	0.459964	5.77638	2.56228	0.0219069	0.44452	-3.22907
SNORD3D	0.62381	8.30564	2.56221	0.0219102	0.44452	-3.2292
IGHA2	0.742155	6.56497	2.56191	0.021923	0.44452	-3.22969
GEMIN4	0.390767	4.22919	2.56176	0.0219294	0.44452	-3.22994
NLRP13	0.432374	3.09572	2.56146	0.0219426	0.44452	-3.23045
DAZ2	0.41328	3.03217	2.56023	0.021996	0.44452	-3.23252
ROMO1	0.593804	8.34798	2.55855	0.022069	0.44452	-3.23533
RPS26P8	0.516374	7.96838	2.55813	0.022087	0.44452	-3.23602
PNPLA4	0.501172	5.27314	2.55694	0.0221391	0.44452	-3.23802
MSMO1	0.632169	7.00469	2.55672	0.0221485	0.44452	-3.23839
OR7E161P	0.456247	2.44952	2.55617	0.0221726	0.44452	-3.23931
RPS18P12	0.671409	7.51222	2.55413	0.0222618	0.44452	-3.24272
GPR89B	0.552404	4.74928	2.55236	0.0223399	0.44452	-3.24569
PNP	0.431564	6.70056	2.55212	0.0223504	0.44452	-3.24609
MRPL21	0.464473	5.25667	2.55178	0.0223655	0.44452	-3.24667
RIOK3	0.706828	6.19078	2.5511	0.0223955	0.44452	-3.2478
MRPL3	0.594196	3.49512	2.55094	0.0224025	0.44452	-3.24807
ZNF57	0.490465	5.45354	2.5509	0.0224042	0.44452	-3.24813
BBS4	0.423431	3.04422	2.55079	0.0224088	0.44452	-3.24831
PERP	0.577405	6.44122	2.55054	0.0224202	0.44452	-3.24874
PHB	0.477439	5.79	2.55027	0.0224321	0.44452	-3.24919
EIF4A1	0.386858	8.26259	2.54911	0.0224832	0.44452	-3.25112
RPL37P23	0.513648	6.57238	2.54895	0.0224905	0.44452	-3.2514
CCDC89	0.495445	2.14944	2.5489	0.0224928	0.44452	-3.25148
TMEM241	0.465061	3.82234	2.54814	0.0225262	0.44452	-3.25274
SRI	0.460351	5.2297	2.54685	0.0225839	0.44452	-3.25491
STAMBP	0.476655	5.54819	2.54648	0.0226002	0.44452	-3.25553
FRG2MP	0.417102	2.60174	2.5462	0.0226126	0.44452	-3.25599
DEK	0.430237	9.6088	2.54597	0.0226228	0.44452	-3.25638
TMX2P1	0.414874	6.15192	2.54574	0.0226331	0.44452	-3.25676
GXYLT1	0.497853	3.82686	2.54559	0.0226398	0.44452	-3.25701
KRT18P56	0.383996	4.0309	2.54553	0.0226423	0.44452	-3.25711
RPS17	0.653798	9.65215	2.54487	0.0226718	0.44452	-3.25821
ADD3	0.579846	3.66578	2.54486	0.0226723	0.44452	-3.25823
FARSB	0.606005	4.66618	2.5444	0.0226932	0.44452	-3.25901
NIFKP8	0.410944	2.47573	2.5443	0.0226973	0.44452	-3.25917
PA2G4P3	0.478275	3.6437	2.54396	0.0227128	0.44452	-3.25975
MIS18A	0.671905	5.13633	2.54324	0.0227448	0.444827	-3.26094
TM9SF4	0.607485	7.00494	2.54046	0.0228697	0.445356	-3.26559
BLCAP	0.438555	5.02086	2.53773	0.022993	0.447148	-3.27015
CXCL3	0.50552	5.816	2.53714	0.0230195	0.447315	-3.27113
NAA10	0.504593	5.21035	2.53626	0.0230597	0.447569	-3.27261
GSTP1	0.542516	7.41681	2.53602	0.0230707	0.447569	-3.27301
SLC6A10P	0.693552	5.96118	2.53413	0.0231565	0.448225	-3.27617
RPL9P32	0.571245	5.13132	2.53332	0.0231933	0.448225	-3.27751
HSPE1P14	0.666377	4.35518	2.53287	0.0232141	0.448225	-3.27827
KIF20A	0.445163	4.35565	2.53215	0.0232469	0.448225	-3.27947
C4orf46	0.487171	2.9916	2.53179	0.0232636	0.44823	-3.28008
ISG20L2	0.451813	7.77669	2.53064	0.0233162	0.448694	-3.28199
UQCRFS1	0.368911	4.95421	2.52841	0.0234187	0.448694	-3.28571
ANP32B	0.468408	4.67391	2.52806	0.0234345	0.448694	-3.28629
MKI67	0.677128	5.50593	2.52729	0.0234704	0.448732	-3.28759
RPL41	0.502769	10.4819	2.52542	0.0235565	0.449228	-3.29069
BAZ1A	0.636264	3.70639	2.52541	0.0235572	0.449228	-3.29072
COX17	0.532426	6.65199	2.52443	0.0236024	0.449228	-3.29234
VAPB	0.760853	7.46695	2.52328	0.023656	0.449228	-3.29427
PSMA4	0.50819	3.46148	2.52303	0.0236677	0.449228	-3.29469
ARL4AP1	0.572069	4.353	2.52271	0.0236828	0.449228	-3.29523
NIFK	0.658604	8.49916	2.52238	0.0236981	0.449228	-3.29578
LSR	0.516251	6.03967	2.52197	0.0237172	0.449228	-3.29646
MTND4LP1	0.594035	7.04037	2.5218	0.0237251	0.449228	-3.29674
COPS2	0.41755	5.51476	2.5216	0.0237342	0.449228	-3.29706
RPL19P21	0.447239	5.67232	2.5206	0.0237812	0.449228	-3.29874
NAPG	0.51133	4.00759	2.52025	0.0237973	0.449228	-3.29932
RRM2	0.462503	4.72253	2.51942	0.0238363	0.449228	-3.3007
VSIG2	0.592676	4.88793	2.51863	0.0238733	0.449228	-3.30202
PLEK2	0.639509	5.43736	2.51848	0.0238806	0.449228	-3.30228
AGMAT	0.550189	4.8627	2.51772	0.0239161	0.449228	-3.30354
FERMT1	0.736996	7.8284	2.51753	0.0239249	0.449228	-3.30385
RPL8	0.547717	8.50017	2.51711	0.0239447	0.449228	-3.30455
NSUN7	0.624914	3.17406	2.51464	0.0240611	0.450325	-3.30866
MTCH2	0.600127	6.43574	2.51456	0.0240651	0.450325	-3.3088
SNRPG	0.614213	9.21296	2.51412	0.0240857	0.450374	-3.30953
SLC25A5P5	0.734988	3.31563	2.51284	0.0241464	0.450919	-3.31166
ZNF324	0.417124	3.93381	2.51205	0.024184	0.451314	-3.31298
FANCG	0.447	3.56717	2.51123	0.024223	0.451681	-3.31435
NRBF2P5	0.368734	2.37828	2.51034	0.0242652	0.451681	-3.31582
TCTEX1D1	0.460295	2.46889	2.51021	0.0242716	0.451681	-3.31604
LRIF1	0.488003	3.67459	2.5102	0.0242719	0.451681	-3.31606
APBB3	0.425929	3.32083	2.50958	0.0243018	0.451681	-3.3171
PLPP2	0.483211	5.56413	2.50901	0.0243289	0.451681	-3.31804
ZCCHC9	0.473204	7.27866	2.50888	0.024335	0.451681	-3.31825
YIPF4	0.459951	5.53346	2.50835	0.0243601	0.451681	-3.31913
NDC1	0.471185	4.45957	2.50693	0.0244283	0.452096	-3.3215
IGF2BP2-AS1	0.428615	4.6209	2.50573	0.0244861	0.452096	-3.3235
DNAAF5	0.390637	4.66865	2.5045	0.0245452	0.452096	-3.32555
DGAT1	0.550325	7.05728	2.50408	0.0245654	0.452096	-3.32624
CARHSP1	0.422636	6.33221	2.50405	0.0245668	0.452096	-3.32629
POLE4	0.485826	4.84736	2.50355	0.024591	0.452096	-3.32712
GSTA3	0.475788	3.08789	2.50268	0.0246333	0.452096	-3.32858
PRR15L	0.480816	4.65105	2.5022	0.0246564	0.452096	-3.32938
RPL36A-HNRNPH2	0.606299	6.10375	2.50134	0.0246982	0.45222	-3.33081
NUP37	0.482231	2.14953	2.50088	0.0247203	0.45222	-3.33157
KLK1	0.769639	4.74579	2.50085	0.0247219	0.45222	-3.33162
MRPL50P2	0.407231	3.27138	2.50054	0.0247368	0.45222	-3.33213
RAB12	0.391682	1.86332	2.49968	0.0247787	0.45222	-3.33357
GCNT3	0.762692	6.02677	2.49863	0.0248296	0.45222	-3.3353
C2orf15	0.478748	2.73682	2.49811	0.024855	0.45222	-3.33617
SSR4	0.592406	5.9023	2.49797	0.024862	0.45222	-3.33641
HSP90AB4P	0.364062	5.88648	2.49702	0.0249084	0.452762	-3.33799
CACNA1F	0.402438	3.33049	2.49618	0.0249492	0.4529	-3.33937
RNF186	0.433076	4.56658	2.49471	0.0250211	0.453603	-3.34181
SDAD1	0.573928	4.59251	2.49343	0.0250841	0.454214	-3.34394
C17orf99	0.398148	3.59592	2.49335	0.0250881	0.454214	-3.34408
SCARNA22	0.442028	7.42549	2.49273	0.0251184	0.454221	-3.3451
FAT1	0.576974	6.12046	2.49228	0.0251409	0.454221	-3.34586
GALNT3	0.490712	2.01194	2.49133	0.0251878	0.454221	-3.34744
MRPL37	0.470917	4.97502	2.48995	0.0252562	0.454221	-3.34973
NLGN4Y	0.465927	2.15464	2.4894	0.025283	0.454221	-3.35063
SNRPEP4	0.550755	6.53191	2.48898	0.025304	0.454221	-3.35133
SNRPD2	0.425669	6.43442	2.48888	0.0253092	0.454221	-3.35151
RPSAP2	0.511858	3.96219	2.48821	0.025342	0.454221	-3.3526
HMGA1P2	0.364708	6.96186	2.48772	0.0253669	0.454221	-3.35343
APOOP5	0.583342	3.45278	2.48726	0.0253893	0.454221	-3.35418
ZNF200	0.461451	2.72786	2.48662	0.0254212	0.454221	-3.35524
MTHFD1	0.445692	5.5569	2.48554	0.0254753	0.45475	-3.35705
SNRPE	0.624346	8.61973	2.4851	0.0254975	0.45475	-3.35778
RPL35AP21	0.572017	9.40597	2.4847	0.0255174	0.45475	-3.35844
HIPK4	0.419331	2.47354	2.48321	0.0255916	0.455176	-3.3609
TPM3P1	0.543666	4.32072	2.48307	0.0255988	0.455176	-3.36114
ZC3H14	0.66065	7.28299	2.48151	0.0256774	0.455752	-3.36373
RPL38	0.538907	10.2234	2.48125	0.0256905	0.455752	-3.36416
RBX1	0.503206	3.8907	2.47884	0.0258117	0.456532	-3.36815
NIP7	0.494021	6.74639	2.47841	0.0258338	0.456532	-3.36887
TSPAN13	0.846717	6.38825	2.47674	0.0259182	0.456532	-3.37163
RPL7P44	0.362498	5.04339	2.47637	0.0259368	0.456532	-3.37224
SPCS2	0.530698	5.50149	2.47594	0.0259589	0.456532	-3.37296
CORO2A	0.811503	4.72074	2.47577	0.0259677	0.456532	-3.37325
RPL5P23	0.474108	2.20059	2.4746	0.0260271	0.456532	-3.37518
FBXO9	0.714253	5.90268	2.47248	0.0261353	0.456532	-3.37869
GRHL2	0.49787	5.17956	2.47222	0.0261484	0.456532	-3.37912
RPL30	0.614442	11.3902	2.4721	0.0261546	0.456532	-3.37932
CCL28	0.773461	4.68955	2.47085	0.0262188	0.456532	-3.38139
TRAP1	0.430347	3.31371	2.47031	0.0262464	0.456532	-3.38228
NDUFA12	0.666971	6.03665	2.4695	0.0262881	0.456532	-3.38362
MYH14	0.458974	5.00896	2.46937	0.0262951	0.456532	-3.38385
ETNK1	0.444037	6.40569	2.46906	0.026311	0.456532	-3.38436
EEF1GP3	0.440838	5.20058	2.46894	0.0263168	0.456532	-3.38455
POLR2L	0.428793	7.09636	2.46864	0.0263323	0.456532	-3.38504
RPSAP21	0.397776	4.90357	2.46838	0.0263459	0.456532	-3.38548
PRDX1	0.538614	6.58318	2.46832	0.026349	0.456532	-3.38558
DDC	0.515183	2.79636	2.46813	0.0263589	0.456532	-3.3859
PAXBP1P1	0.404462	2.24208	2.46733	0.0264	0.456532	-3.38722
B3GALNT2	0.418716	3.2705	2.46569	0.026485	0.456532	-3.38993
TMA7	0.565852	7.13115	2.46547	0.0264961	0.456532	-3.39029
TINF2	0.421467	4.87911	2.46486	0.0265281	0.456532	-3.39131
RRP36	0.422312	4.11354	2.46466	0.0265385	0.456532	-3.39164
SLC35B1	0.511869	7.58127	2.46452	0.0265458	0.456532	-3.39187
BCL2L15	0.50846	3.42461	2.46403	0.0265708	0.456532	-3.39267
SMC2	0.628883	4.50795	2.46358	0.0265946	0.456532	-3.39343
RPL18P13	0.780657	6.86842	2.46322	0.0266129	0.456532	-3.39401
SLC25A5P3	0.565261	3.10813	2.46313	0.0266178	0.456532	-3.39416
TXNP5	0.377602	2.44984	2.46253	0.0266492	0.456532	-3.39516
OR5M9	0.42524	3.2766	2.46205	0.026674	0.456532	-3.39595
WNT2B	0.532226	3.22014	2.46198	0.026678	0.456532	-3.39607
TGS1	0.610593	6.49812	2.46171	0.0266916	0.456532	-3.39651
ODC1	0.571463	5.13966	2.46155	0.0267002	0.456532	-3.39678
MTCO2P12	0.584172	7.91346	2.4609	0.0267339	0.456532	-3.39785
IBA57	0.401247	4.28448	2.46025	0.0267682	0.456766	-3.39893
MTND5P4	0.447276	5.22569	2.45833	0.0268687	0.457723	-3.4021
CDC14B	0.476404	3.15549	2.45783	0.0268949	0.457723	-3.40292
POU6F2	0.799232	5.10032	2.45759	0.0269076	0.457723	-3.40332
RPL9	0.634851	8.52619	2.45738	0.0269187	0.457723	-3.40367
CKS1BP3	0.759647	6.94766	2.45726	0.0269249	0.457723	-3.40386
SAAL1	0.471211	4.94044	2.45522	0.0270326	0.458283	-3.40724
SMAD6	0.730334	3.34019	2.45522	0.0270327	0.458283	-3.40724
TSR2	0.477148	3.86384	2.45437	0.0270776	0.458606	-3.40864
FASN	0.553977	5.73284	2.45225	0.0271899	0.459559	-3.41214
GAPDHP61	0.432476	5.49744	2.45131	0.0272399	0.459559	-3.41369
RPS3AP9	0.408895	2.54667	2.44989	0.0273157	0.459559	-3.41604
HNRNPF	0.473569	8.88385	2.44967	0.0273273	0.459559	-3.4164
YBX1P4	0.437407	4.20383	2.44951	0.0273359	0.459559	-3.41667
UBE2V1P11	0.577487	6.11749	2.44756	0.0274404	0.46103	-3.41989
RPL14	0.498627	7.73779	2.44724	0.0274572	0.46103	-3.42041
RPL23AP41	0.73776	5.68497	2.44491	0.0275826	0.461582	-3.42426
NACC1	0.397253	4.39094	2.4447	0.0275942	0.461582	-3.42461
APEX1	0.612571	5.56747	2.4436	0.0276535	0.461582	-3.42643
SNORA26	0.407428	6.85608	2.44349	0.0276591	0.461582	-3.4266
KLF5	0.650454	7.1455	2.44294	0.027689	0.46177	-3.42751
RIPK4	0.391349	2.88681	2.44266	0.0277041	0.46177	-3.42797
FLVCR1	0.507814	4.20374	2.44209	0.0277349	0.461983	-3.42891
UQCRBP3	0.392777	2.95689	2.44053	0.0278195	0.462662	-3.43148
VRTN	0.362919	3.95695	2.44042	0.0278255	0.462662	-3.43167
TUBA1B	0.526863	8.41043	2.43986	0.0278561	0.462889	-3.43259
ND2	0.523743	10.046	2.43925	0.0278891	0.462929	-3.43359
GMDS	0.719644	6.95131	2.43874	0.0279166	0.462929	-3.43443
MTVR2	0.394743	4.64249	2.43857	0.0279263	0.462929	-3.43472
EEF1E1	0.393589	6.50159	2.43795	0.0279599	0.463115	-3.43573
SULT1E1	0.463331	2.74653	2.43716	0.0280031	0.463115	-3.43704
TMEM219	0.418096	4.68753	2.43687	0.0280188	0.463115	-3.43751
RPS3AP47	0.492292	4.14682	2.43464	0.0281409	0.464231	-3.44119
CBX3	0.61649	6.96438	2.43354	0.0282012	0.46432	-3.44299
RPL23AP58	0.436422	5.3889	2.433	0.028231	0.46432	-3.44388
PREP	0.41773	4.82148	2.43254	0.0282567	0.46432	-3.44465
CEP55	0.385967	3.38995	2.43229	0.0282705	0.46432	-3.44507
UTP4	0.501261	4.71551	2.4301	0.0283911	0.464709	-3.44866
ANKRD22	0.601147	6.9608	2.42999	0.0283972	0.464709	-3.44884
GNG5	0.47773	6.47911	2.42835	0.0284883	0.464709	-3.45154
KRT8P39	0.40399	4.65586	2.42834	0.0284886	0.464709	-3.45155
PPCS	0.518864	6.54622	2.42814	0.0285	0.464709	-3.45189
CRNDE	0.450325	3.44826	2.42784	0.0285166	0.464709	-3.45238
MYCBP	0.513779	5.74013	2.42703	0.0285617	0.464709	-3.45372
UBA52P8	0.397881	4.19887	2.42669	0.0285806	0.464709	-3.45427
ADAP1	0.427544	4.97286	2.42623	0.0286064	0.464709	-3.45503
ANXA4	0.462786	6.03175	2.42614	0.0286111	0.464709	-3.45517
RPL35	0.527248	7.1873	2.42471	0.0286909	0.464725	-3.45753
XPNPEP1	0.568676	5.41057	2.42426	0.0287165	0.464725	-3.45828
OR13C6P	0.383579	2.82835	2.42415	0.0287223	0.464725	-3.45845
SNORA38	0.455118	7.44807	2.42367	0.0287491	0.464725	-3.45924
PPP1R8	0.564837	4.48418	2.42259	0.0288098	0.464725	-3.46102
MGST2	0.59468	7.17226	2.42225	0.028829	0.464725	-3.46158
LRGUK	0.366172	2.7184	2.42206	0.0288394	0.464725	-3.46188
TMEM238	0.389201	6.21959	2.42205	0.0288403	0.464725	-3.46191
DDIAS	0.429125	2.18565	2.42201	0.0288424	0.464725	-3.46197
FAM72B	0.417256	2.33842	2.42163	0.0288638	0.464725	-3.4626
RPL6P2	0.392428	5.49572	2.42154	0.0288687	0.464725	-3.46274
RPS2	0.591628	4.4373	2.4182	0.0290574	0.46693	-3.46824
RILPL2	0.444743	4.18063	2.41742	0.0291016	0.46693	-3.46952
HSPA4L	0.675543	3.13124	2.41712	0.0291187	0.46693	-3.47001
LAPTM4B	0.545228	3.24939	2.41614	0.0291742	0.46693	-3.47162
LRP8	0.401891	2.47127	2.41571	0.0291987	0.46693	-3.47233
HNRNPA1P63	0.349127	2.91721	2.41568	0.0292001	0.46693	-3.47237
SCARNA9L	0.547307	5.93816	2.41506	0.0292352	0.467015	-3.47338
ASF1B	0.354229	5.49423	2.41428	0.0292797	0.467208	-3.47466
SDR9C7	0.421807	2.47417	2.41341	0.0293296	0.467295	-3.4761
CCDC125	0.35799	3.04562	2.41331	0.0293353	0.467295	-3.47627
RPL30P14	0.383739	2.54959	2.41329	0.0293364	0.467295	-3.4763
ATP1B1	0.720464	6.93208	2.41206	0.0294064	0.467864	-3.47831
TMX2	0.582804	6.99522	2.41017	0.0295148	0.468701	-3.48141
HS3ST3B1	0.410024	3.95925	2.40995	0.0295276	0.468701	-3.48178
BCAS1	0.452013	4.66596	2.40948	0.0295547	0.468701	-3.48255
PALB2	0.421459	6.03259	2.40902	0.0295814	0.468701	-3.48331
LCN10	0.419404	4.58183	2.40828	0.0296238	0.468701	-3.48452
PSMF1	0.568198	7.39366	2.40807	0.0296357	0.468701	-3.48486
ASPM	0.550292	4.30808	2.4064	0.0297322	0.468701	-3.4876
RPL6	0.450123	8.24443	2.40628	0.0297393	0.468701	-3.4878
ST6GALNAC1	0.902392	5.63745	2.40608	0.0297509	0.468701	-3.48813
ALDH9A1	0.397804	4.42691	2.40528	0.0297972	0.46904	-3.48944
NDUFB1	0.527541	8.82831	2.40511	0.0298069	0.46904	-3.48971
RPS26P55	0.367664	5.60209	2.40336	0.0299088	0.469572	-3.49259
SMPD3	0.548586	3.96719	2.40335	0.0299094	0.469572	-3.49261
LGALS4	0.947679	8.53909	2.40273	0.0299453	0.469673	-3.49362
TRBV22-1	0.405333	3.75818	2.40054	0.0300727	0.469673	-3.4972
SEC62	0.417248	6.70406	2.4005	0.0300754	0.469673	-3.49728
CDK8	0.442493	4.48439	2.40018	0.0300941	0.469673	-3.4978
RPL37A	0.545147	11.1442	2.39939	0.0301406	0.469673	-3.4991
EXOC5	0.527769	4.65273	2.39836	0.030201	0.470096	-3.50079
ACOT13	0.660408	4.60394	2.39778	0.030235	0.470179	-3.50174
EPHA2	0.45123	4.7837	2.39644	0.0303135	0.470795	-3.50392
YWHAZP6	0.401676	3.45602	2.39576	0.030354	0.470908	-3.50505
IDH3A	0.429109	6.89679	2.39571	0.0303567	0.470908	-3.50512
TMED2	0.380269	7.41352	2.39369	0.0304758	0.47222	-3.50842
UCHL3	0.509721	3.29587	2.39217	0.0305661	0.473081	-3.51091
C3orf62	0.365413	3.10478	2.38966	0.0307152	0.473739	-3.51501
ARHGEF39	0.461666	3.7734	2.38913	0.0307473	0.473739	-3.51589
PPP1R8P1	0.505026	3.74065	2.38892	0.0307595	0.473739	-3.51623
SLC17A9	0.397596	5.43265	2.38823	0.030801	0.473739	-3.51736
MPDU1	0.444201	3.99276	2.38764	0.0308362	0.473739	-3.51832
ORC6	0.445284	3.02606	2.38761	0.0308379	0.473739	-3.51837
FDFT1	0.369545	5.20444	2.38703	0.0308727	0.473739	-3.51932
TARBP1	0.498256	5.50184	2.38674	0.0308902	0.473739	-3.5198
LRRC37B	0.476979	3.42169	2.38671	0.0308921	0.473739	-3.51985
AGT	0.635295	4.12944	2.38652	0.0309035	0.473739	-3.52016
GNPNAT1	0.454585	4.14107	2.38605	0.0309313	0.473898	-3.52092
PPIAP22	0.461773	4.66698	2.38549	0.0309649	0.474147	-3.52183
BTF3	0.427985	7.422	2.38484	0.031004	0.474232	-3.5229
ZNF440	0.448165	6.10617	2.38418	0.0310437	0.474232	-3.52397
PHBP2	0.495791	3.10943	2.38405	0.0310518	0.474232	-3.52419
COX6A1P2	0.387439	8.11398	2.38386	0.0310634	0.474232	-3.52451
GLRX2	0.487389	5.03717	2.38345	0.0310878	0.474232	-3.52517
CCNB2	0.54119	3.71725	2.38274	0.0311306	0.474232	-3.52633
COX6C	0.657017	8.22705	2.38252	0.0311442	0.474232	-3.52669
GPC5	0.387944	2.19971	2.37967	0.0313169	0.476331	-3.53135
SYAP1	0.355014	5.26498	2.37938	0.0313343	0.476331	-3.53182
FAM177B	0.636107	4.68978	2.37903	0.0313555	0.476387	-3.53239
TERF1P4	0.377905	5.88766	2.37866	0.0313784	0.47647	-3.533
CYCSP11	0.394414	4.72046	2.37747	0.0314509	0.476899	-3.53494
GSK3B	0.484881	6.67224	2.37741	0.0314541	0.476899	-3.53503
BTF3P13	0.472233	4.37764	2.37705	0.0314765	0.476899	-3.53563
MRPS21	0.398747	5.8372	2.37583	0.0315506	0.4774	-3.53761
HSP90AB1	0.512331	8.91006	2.37565	0.031562	0.4774	-3.53791
TMEM62	0.608876	4.60907	2.37415	0.0316537	0.477887	-3.54035
STRN	0.45875	3.97433	2.372	0.0317861	0.478319	-3.54387
RPS26P56	0.395452	4.59196	2.37175	0.0318017	0.478319	-3.54428
PTP4A2P2	0.369411	7.74477	2.37147	0.0318187	0.478319	-3.54473
RPL31P35	0.539935	7.10871	2.37126	0.0318318	0.478319	-3.54508
TIA1	0.707128	4.93242	2.37056	0.0318749	0.478319	-3.54621
LAMTOR2	0.458643	6.20094	2.36904	0.0319686	0.478319	-3.54869
PPP1R14C	0.433355	3.23743	2.36869	0.0319908	0.478319	-3.54927
RIOK1	0.464605	5.09568	2.36856	0.0319988	0.478319	-3.54948
NPM1P40	0.419373	2.63604	2.36854	0.0320001	0.478319	-3.54951
MRPL13	0.734932	4.0605	2.36732	0.0320753	0.478319	-3.55149
PFDN6	0.40948	5.5839	2.36698	0.0320968	0.478319	-3.55205
RANBP1	0.417225	3.53317	2.36689	0.0321023	0.478319	-3.5522
CALML4	0.602686	7.05296	2.36617	0.032147	0.478319	-3.55337
RPS15AP1	0.563167	6.70546	2.36579	0.0321711	0.478319	-3.554
CASP3	0.398015	4.09545	2.36461	0.0322444	0.478319	-3.55591
OXGR1	0.348876	2.52762	2.36413	0.0322744	0.478319	-3.5567
CYP2R1	0.385892	2.1929	2.36374	0.032299	0.478319	-3.55734
PRDM4	0.519777	4.63315	2.36269	0.0323646	0.478319	-3.55904
RPARP-AS1	0.404507	7.08586	2.36112	0.0324628	0.478319	-3.56159
RPL21	0.474555	10.0487	2.36093	0.0324749	0.478319	-3.5619
SFR1	0.426471	3.95808	2.36088	0.0324779	0.478319	-3.56198
ATP8B5P	0.393081	2.79086	2.36031	0.032514	0.478319	-3.56292
TSEN2	0.621666	5.10384	2.35954	0.0325626	0.478319	-3.56417
ASB12	0.394134	2.35664	2.35901	0.0325956	0.478319	-3.56503
GMCL1	0.450092	4.32943	2.35901	0.032596	0.478319	-3.56503
PMS2P1	0.509431	5.5714	2.359	0.0325967	0.478319	-3.56505
TRAPPC2P8	0.356727	2.37904	2.35891	0.0326024	0.478319	-3.5652
ERH	0.604037	5.19307	2.35868	0.0326166	0.478319	-3.56557
LRRC19	0.845606	3.71312	2.3583	0.032641	0.478319	-3.56619
SETD5	0.427515	4.27047	2.35809	0.0326538	0.478319	-3.56652
USP2-AS1	0.389779	5.73279	2.35808	0.0326545	0.478319	-3.56654
NAALADL2	0.579428	2.99225	2.35767	0.0326804	0.478319	-3.56721
SEC61B	0.477014	5.45902	2.3576	0.032685	0.478319	-3.56733
RPL7P1	0.608835	7.5131	2.35734	0.0327016	0.478319	-3.56775
RNF6	0.519407	4.55846	2.35729	0.0327046	0.478319	-3.56783
RPL35AP19	0.483012	5.12087	2.35712	0.0327155	0.478319	-3.56811
KLHDC10	0.362932	5.41394	2.357	0.0327231	0.478319	-3.56831
SLC35F2	0.411039	4.0349	2.35602	0.0327848	0.478687	-3.56989
BRCA1	0.401302	2.42585	2.35599	0.0327868	0.478687	-3.56994
OR52J1P	0.453849	3.10646	2.35457	0.0328771	0.47975	-3.57226
TMEM209	0.439703	4.08241	2.35215	0.0330315	0.480432	-3.57619
ND5	0.451658	11.429	2.35213	0.0330327	0.480432	-3.57622
HOXC12	0.369514	2.64081	2.35117	0.0330938	0.480432	-3.57778
F7	0.398301	4.79415	2.35098	0.0331061	0.480432	-3.57809
TUBB8P1	0.384535	3.55868	2.3508	0.0331177	0.480432	-3.57838
RDH10	0.702346	4.16125	2.34996	0.0331715	0.480432	-3.57975
USP12PX	0.365603	1.70372	2.34947	0.0332033	0.480432	-3.58055
ATF7IP2	0.529161	3.25342	2.34945	0.0332042	0.480432	-3.58058
SLC39A7	0.423283	5.87529	2.34923	0.0332188	0.480432	-3.58094
STATH	0.412351	3.04523	2.3489	0.0332397	0.480432	-3.58147
SAMM50	0.392638	5.62029	2.3488	0.0332463	0.480432	-3.58164
DTYMK	0.473702	3.47944	2.34801	0.0332969	0.480482	-3.58292
RPL7	0.481702	7.90318	2.34609	0.0334205	0.481513	-3.58603
LIN9	0.350056	2.18054	2.34609	0.0334205	0.481513	-3.58603
CD47	0.617794	5.99338	2.34596	0.0334288	0.481513	-3.58624
RPS16	0.550729	10.3903	2.34567	0.0334478	0.481513	-3.58672
HACD2	0.755649	6.59432	2.34319	0.0336084	0.482561	-3.59074
C12orf29	0.519159	6.75554	2.34305	0.0336177	0.482561	-3.59098
OR8A2P	0.354314	2.19809	2.34249	0.0336542	0.4827	-3.59189
GOT2	0.462655	7.08302	2.34236	0.0336628	0.4827	-3.5921
STARD7	0.48156	7.10622	2.34206	0.0336818	0.48272	-3.59258
SPINK4	0.983447	3.02673	2.34155	0.033715	0.482916	-3.5934
OR51L1	0.4145	2.09918	2.34104	0.0337486	0.482916	-3.59424
POLR3C	0.362707	5.36582	2.34006	0.0338124	0.483543	-3.59583
RPL23AP37	0.665611	6.25224	2.33955	0.0338455	0.483543	-3.59665
PIK3R4	0.42379	4.17846	2.33916	0.0338713	0.483658	-3.59729
SFT2D3	0.3793	5.24522	2.33572	0.0340969	0.484769	-3.60286
NUP210	0.3614	4.19541	2.33566	0.0341011	0.484769	-3.60297
GTF3A	0.422073	8.49204	2.33554	0.0341089	0.484769	-3.60316
CGA	0.460923	3.58151	2.33481	0.0341571	0.485201	-3.60434
RPL21P32	0.478549	3.60396	2.33377	0.0342254	0.485355	-3.60602
OR7E14P	0.628765	4.65129	2.33321	0.0342623	0.485355	-3.60693
ZBTB10	0.405098	2.0852	2.33205	0.0343393	0.485355	-3.60881
MRPL39	0.433845	4.57211	2.33191	0.0343487	0.485355	-3.60904
RPL6P21	0.367164	3.85808	2.33165	0.0343657	0.485355	-3.60946
HSFY1P1	0.372836	1.71676	2.33137	0.0343844	0.485355	-3.60991
RPL21P112	0.368823	2.06011	2.3311	0.0344021	0.485355	-3.61035
SAGE1	0.378768	2.0061	2.33085	0.0344186	0.485355	-3.61075
CAPN12	0.430543	3.75523	2.33075	0.0344254	0.485355	-3.61092
TRIM31	0.839841	5.56683	2.33062	0.034434	0.485355	-3.61112
RPS23	0.556231	10.1136	2.3302	0.034462	0.485355	-3.61181
CKS1BP7	0.548484	6.68451	2.32924	0.0345263	0.485895	-3.61337
LIN52	0.432274	4.22847	2.32604	0.0347401	0.487779	-3.61855
SSBP1	0.410091	4.78313	2.32534	0.0347866	0.487779	-3.61968
PLEKHG7	0.367042	2.06694	2.32531	0.0347888	0.487779	-3.61973
RPL21P41	0.387103	5.08544	2.32483	0.034821	0.487779	-3.6205
CIB1	0.519509	4.0522	2.32419	0.0348641	0.487883	-3.62154
ARL6IP1P2	0.388481	6.97934	2.323	0.0349442	0.488065	-3.62347
EEF1A1P10	0.438001	2.74819	2.32176	0.0350275	0.488065	-3.62547
CISD3	0.475846	5.41431	2.32172	0.0350302	0.488065	-3.62553
COMMD2	0.354025	5.45452	2.32124	0.035063	0.488065	-3.62632
NXPE2	0.495405	3.60294	2.32111	0.0350717	0.488065	-3.62652
RPS3AP49	0.506065	5.68063	2.32081	0.0350916	0.488065	-3.627
CALM1	0.752666	4.08826	2.31974	0.0351645	0.48828	-3.62874
RRP9	0.395568	3.89055	2.31973	0.0351651	0.48828	-3.62876
VWA8	0.397515	2.89397	2.31947	0.0351829	0.48828	-3.62918
IL18R1	0.479003	3.11736	2.31929	0.0351945	0.48828	-3.62946
RNF217-AS1	0.394512	2.29955	2.31821	0.0352679	0.48828	-3.63121
RPL4P4	0.397092	7.46019	2.31771	0.0353024	0.48828	-3.63202
AP3S2	0.39292	4.65581	2.31769	0.0353031	0.48828	-3.63204
RPL18A	0.395775	8.9941	2.31733	0.0353278	0.48828	-3.63263
SNORD41	0.759811	5.46613	2.31721	0.0353362	0.48828	-3.63283
PPIAL4G	0.393028	4.39224	2.3169	0.0353575	0.48828	-3.63333
TTC9C	0.417744	6.03359	2.31679	0.0353649	0.48828	-3.63351
PBLD	0.424329	3.62104	2.31589	0.0354261	0.48838	-3.63496
GDAP1	0.457154	2.9306	2.31415	0.0355447	0.48838	-3.63776
XRCC4	0.437955	4.03918	2.31391	0.0355615	0.48838	-3.63816
S100A16	0.3773	3.00636	2.31357	0.0355849	0.488456	-3.63871
RPL13AP5	0.443133	9.55581	2.31289	0.0356312	0.4886	-3.6398
PRPF38A	0.463464	5.46559	2.31117	0.0357498	0.48998	-3.64259
RPS15A	0.503436	11.0223	2.31071	0.0357815	0.490169	-3.64333
CHMP4C	0.373133	4.56594	2.3097	0.035851	0.490509	-3.64496
MTND1P23	0.453035	11.2507	2.30956	0.0358602	0.490509	-3.64517
CCT6P1	0.569127	5.34424	2.30825	0.0359511	0.491505	-3.64729
ACSL5	0.472877	8.25094	2.30791	0.0359749	0.49156	-3.64785
RPL12P50	0.476131	7.14602	2.30694	0.0360416	0.49156	-3.6494
ENTPD5	0.402593	4.51783	2.30671	0.0360578	0.49156	-3.64978
PAAF1	0.404594	3.31923	2.30592	0.0361125	0.49156	-3.65105
RPL15P4	0.449753	3.45283	2.3059	0.036114	0.49156	-3.65108
ENTPD6	0.374421	4.11786	2.30586	0.0361171	0.49156	-3.65116
POLQ	0.492835	2.84243	2.30462	0.0362032	0.492304	-3.65315
SNRPGP15	0.389373	5.80585	2.30348	0.0362825	0.492828	-3.65499
SSU72P2	0.3757	3.26113	2.30164	0.0364114	0.493185	-3.65796
WDR5B	0.374916	3.87434	2.30031	0.0365046	0.493185	-3.6601
CSAG1	0.526159	4.29065	2.30015	0.0365159	0.493185	-3.66036
REXO1L2P	0.370061	4.07287	2.29974	0.0365444	0.493185	-3.66101
PLEKHG3	0.447464	4.39602	2.29931	0.0365744	0.493185	-3.6617
SMLR1	0.358789	2.47795	2.29903	0.0365946	0.493185	-3.66216
OR4Q2	0.355712	2.29117	2.29827	0.0366481	0.493185	-3.66339
CNOT2	0.5567	4.04976	2.2982	0.036653	0.493185	-3.6635
NASP	0.46265	2.68346	2.29797	0.036669	0.493185	-3.66386
RPS7P8	0.453067	5.01362	2.29796	0.03667	0.493185	-3.66389
COX7A2L	0.468178	5.68594	2.29738	0.0367105	0.493485	-3.66481
GPRC5B	0.34336	4.6335	2.29633	0.0367847	0.493754	-3.6665
DSP	0.565364	6.63671	2.2949	0.0368862	0.494395	-3.66881
SCYL2	0.49513	4.66316	2.29463	0.0369049	0.494395	-3.66924
DMRTC1	0.52574	4.42805	2.29363	0.0369759	0.495103	-3.67085
NOMO3	0.510045	6.13149	2.29307	0.0370157	0.495393	-3.67175
STAG3L4	0.437971	3.76043	2.29279	0.0370359	0.49542	-3.6722
BIVM	0.561898	3.88312	2.29054	0.0371963	0.496503	-3.67582
HNRNPA1P27	0.416029	3.10644	2.29053	0.0371971	0.496503	-3.67584
TMEM38B	0.388912	5.46912	2.29038	0.0372077	0.496503	-3.67608
FUT2	0.600196	4.64241	2.28953	0.0372685	0.49675	-3.67745
CASC8	0.400755	2.8397	2.28851	0.0373418	0.49675	-3.67909
HOOK2	0.48467	3.0993	2.28714	0.0374396	0.49675	-3.68128
DVL1	0.383731	3.85466	2.28694	0.0374543	0.49675	-3.68161
RPS2P55	0.521018	7.63802	2.28657	0.037481	0.49675	-3.68221
WDR41	0.401839	2.30356	2.28554	0.0375551	0.49675	-3.68386
CCNYL1	0.419955	5.63712	2.28544	0.037562	0.49675	-3.68402
TAF2	0.56518	5.63715	2.28531	0.037572	0.49675	-3.68424
OCSTAMP	0.510727	3.05597	2.2848	0.0376083	0.49675	-3.68505
RPL26P19	0.371261	8.06651	2.28338	0.0377111	0.497125	-3.68733
RAVER2	0.506747	5.39278	2.28265	0.0377642	0.497125	-3.68851
FNBP1L	0.407528	3.12033	2.28189	0.0378191	0.497608	-3.68972
CD58	0.493915	4.07072	2.28126	0.0378649	0.49797	-3.69074
RAP1GAP	0.767802	3.65343	2.28042	0.0379261	0.498056	-3.69209
RPL23AP74	0.601989	8.40852	2.2799	0.037964	0.498201	-3.69293
BABAM1	0.375161	5.17631	2.27976	0.0379737	0.498201	-3.69314
TNFRSF11A	0.384029	5.11033	2.27902	0.0380279	0.498537	-3.69433
USP7	0.584153	6.16371	2.2788	0.0380437	0.498537	-3.69468
TAF15	0.505097	5.5122	2.27848	0.038067	0.498537	-3.69519
TMBIM4	0.342107	4.31276	2.27802	0.0381012	0.498676	-3.69594
SERINC2	0.780964	5.09197	2.27729	0.038154	0.499128	-3.6971
MUC4	0.421972	3.15613	2.27675	0.038194	0.499177	-3.69798
TMEM9B-AS1	0.542926	3.99001	2.27619	0.0382351	0.499358	-3.69888
RPS3AP26	0.350328	4.86536	2.27516	0.0383104	0.499482	-3.70052
SCNN1G	0.361503	2.4293	2.27493	0.0383274	0.499482	-3.7009
OR4C16	0.425203	2.32483	2.27308	0.0384636	0.500623	-3.70386
MED21	0.446173	3.32016	2.27302	0.038468	0.500623	-3.70396
AGPAT2	0.337649	5.3816	2.27273	0.0384891	0.500634	-3.70442
CTNNA1	0.617349	4.31121	2.27208	0.0385371	0.50078	-3.70546
NTMT1	0.411624	3.7336	2.27158	0.0385741	0.500809	-3.70626
SUMO2P6	0.373362	5.74187	2.27156	0.038576	0.500809	-3.7063
HSPA14	0.424103	5.7039	2.27117	0.0386047	0.500944	-3.70693
PROZ	0.347192	3.00147	2.27013	0.0386816	0.501517	-3.70859
NPM1P5	0.431879	5.77596	2.26983	0.038704	0.501517	-3.70907
C1orf174	0.377505	3.22977	2.26938	0.0387372	0.501709	-3.70979
UCA1	0.619962	6.27943	2.26832	0.0388155	0.502201	-3.71148
RAD18	0.547224	6.37763	2.26807	0.0388343	0.502201	-3.71188
EIF1P3	0.516394	4.22001	2.26792	0.0388456	0.502201	-3.71213
ABCA5	0.457641	3.25073	2.26788	0.0388488	0.502201	-3.71219
SRP19	0.467924	4.65131	2.26752	0.0388752	0.502305	-3.71276
RPL37AP1	0.515519	9.24382	2.26626	0.0389694	0.502913	-3.71479
RPL21P123	0.403531	2.05245	2.26564	0.0390154	0.502926	-3.71577
BRWD1P1	0.341844	2.64598	2.26517	0.039051	0.503003	-3.71654
RPL17P20	0.406414	2.21921	2.26413	0.0391286	0.503198	-3.7182
SLC39A12	0.404184	2.08179	2.26274	0.0392329	0.503679	-3.72042
GNG5P2	0.396894	3.11505	2.26216	0.0392767	0.503679	-3.72135
RPS3AP39	0.444	4.13038	2.26048	0.039403	0.504585	-3.72404
HES1	0.456435	3.71175	2.26033	0.0394146	0.504585	-3.72428
RFPL4A	0.381931	2.3042	2.25943	0.0394823	0.504585	-3.72572
OR10G4	0.325251	5.23582	2.25936	0.0394878	0.504585	-3.72583
WDR45B	0.345774	5.61256	2.25899	0.0395152	0.504585	-3.72641
ZNF329	0.349681	3.12868	2.25857	0.0395476	0.504585	-3.7271
SNAPC3	0.442665	5.24182	2.25832	0.0395658	0.504585	-3.72748
HUWE1	0.385098	6.21299	2.25814	0.0395795	0.504585	-3.72777
DLGAP1-AS1	0.444953	3.8881	2.25798	0.0395916	0.504585	-3.72803
KRT20	0.663351	4.88265	2.25795	0.0395941	0.504585	-3.72808
ELOVL7	0.553581	3.69655	2.25779	0.0396061	0.504585	-3.72833
RPL13A	0.374983	7.93476	2.25686	0.0396767	0.504778	-3.72982
SSR1P1	0.411982	1.80541	2.25587	0.0397523	0.505281	-3.73141
MRPL33	0.451529	8.09481	2.25585	0.0397533	0.505281	-3.73143
SBNO1	0.389484	5.47856	2.25435	0.0398674	0.50595	-3.73383
RPL7AP71	0.372524	3.53314	2.25372	0.0399159	0.50595	-3.73484
SRP54	0.501919	2.05128	2.25351	0.039932	0.50595	-3.73518
SLC44A5	0.434705	2.71061	2.2528	0.0399864	0.506115	-3.73632
MAD2L1	0.342912	2.66559	2.25256	0.0400043	0.506115	-3.73669
ZNF679	0.364144	3.2637	2.25169	0.0400709	0.506274	-3.73808
TTLL12	0.336246	5.76958	2.25154	0.0400826	0.506274	-3.73832
SNORA79	0.46631	7.14775	2.2504	0.0401702	0.506479	-3.74015
KNOP1	0.364878	5.37944	2.25005	0.0401969	0.506479	-3.7407
CLYBL	0.367033	3.57053	2.25001	0.0402	0.506479	-3.74076
RPL27	0.502594	9.40424	2.24817	0.0403414	0.507233	-3.7437
TRAPPC4	0.432453	5.79693	2.24788	0.0403636	0.507233	-3.74416
SETP1	0.355189	3.38491	2.24782	0.0403685	0.507233	-3.74426
PTMAP1	0.350322	6.93599	2.24767	0.0403801	0.507233	-3.7445
EIF2S3	0.37048	8.31455	2.24573	0.0405299	0.507416	-3.74759
SNORD127	0.411573	2.26283	2.24535	0.0405597	0.507416	-3.7482
GAPDHP24	0.414545	2.72002	2.2451	0.040579	0.507416	-3.7486
SRD5A3	0.561793	4.88198	2.24476	0.0406049	0.507416	-3.74913
RPL21P42	0.418081	5.10036	2.24424	0.0406452	0.507416	-3.74996
CISD1P1	0.355655	3.32605	2.24418	0.0406505	0.507416	-3.75007
MT-TS1	0.366086	10.6796	2.24409	0.0406575	0.507416	-3.75021
NOMO2	0.377955	6.09552	2.2437	0.0406873	0.507467	-3.75082
SLC6A19	0.402094	3.15981	2.2434	0.0407111	0.507531	-3.75131
STIP1	0.371327	4.8594	2.24278	0.0407591	0.507898	-3.7523
ERGIC1	0.418099	4.84167	2.24124	0.0408793	0.508345	-3.75475
FAM221A	0.423302	4.85235	2.2405	0.0409372	0.508345	-3.75594
RPL39P18	0.497718	3.96533	2.24008	0.04097	0.508345	-3.7566
HCAR1	0.322084	3.09104	2.23965	0.0410033	0.508345	-3.75728
RHPN2	0.464272	7.16038	2.2392	0.0410387	0.508345	-3.758
DLAT	0.369171	5.33555	2.23763	0.0411618	0.508345	-3.7605
TTC5	0.330767	1.79249	2.23711	0.0412027	0.508345	-3.76133
CLDN4	0.478736	5.71966	2.23689	0.04122	0.508345	-3.76168
HSPA9	0.450597	8.4361	2.23657	0.0412453	0.508345	-3.76219
KPNA2	0.603756	4.60755	2.23651	0.0412495	0.508345	-3.76228
UXT	0.686343	6.71277	2.23649	0.0412515	0.508345	-3.76232
MRPS35	0.409588	3.42343	2.23637	0.0412604	0.508345	-3.7625
ATP10B	0.52846	4.09466	2.23531	0.0413443	0.508515	-3.76419
SLC20A1	0.443018	4.10547	2.23368	0.0414734	0.509589	-3.76679
C12orf43	0.400336	5.34261	2.23332	0.0415016	0.509597	-3.76736
FMN1	0.709951	5.75054	2.2332	0.0415114	0.509597	-3.76756
UGGT2	0.36543	5.49879	2.23244	0.0415713	0.509845	-3.76876
USP9YP4	0.42879	2.26278	2.23242	0.0415729	0.509845	-3.76879
PSMA5	0.367501	4.64288	2.23223	0.0415876	0.509845	-3.76909
GBX1	0.387732	4.02452	2.23144	0.0416505	0.510387	-3.77035
PTTG1	0.357846	5.17824	2.22924	0.0418259	0.511449	-3.77385
NAT8	0.334533	3.86139	2.22916	0.0418325	0.511449	-3.77398
RPS15AP36	0.414116	2.8573	2.22894	0.0418496	0.511449	-3.77432
SNRPF	0.509347	6.42621	2.22813	0.0419147	0.512016	-3.77562
RPS26P6	0.450292	7.67838	2.22741	0.0419717	0.512483	-3.77675
OR12D2	0.360028	2.03515	2.22548	0.0421267	0.51345	-3.77983
CIAPIN1	0.439044	4.30496	2.22315	0.0423144	0.515054	-3.78353
SUN1	0.374	5.84777	2.22279	0.0423428	0.515171	-3.78409
ID1	0.334952	3.57409	2.22197	0.0424089	0.515451	-3.78539
RPL13AP6	0.388499	8.25715	2.22181	0.0424222	0.515451	-3.78565
TAPT1-AS1	0.405916	4.43381	2.22181	0.0424225	0.515451	-3.78566
HBS1L	0.439256	4.98518	2.22028	0.0425457	0.516238	-3.78808
NUP210L	0.429211	2.63913	2.21984	0.0425818	0.516238	-3.78878
KMT2C	0.353073	5.19431	2.21852	0.0426886	0.516325	-3.79087
NDUFAF2	0.512592	5.50991	2.21839	0.0426997	0.516325	-3.79109
CCP110	0.37193	3.75774	2.21835	0.0427024	0.516325	-3.79114
KLF3	0.383054	5.8046	2.21684	0.0428252	0.517351	-3.79353
COX7CP1	0.444676	8.17806	2.2165	0.0428532	0.517446	-3.79408
UBBP2	0.450077	3.40454	2.2155	0.0429345	0.517446	-3.79566
RPL13AP3	0.452258	5.01516	2.21489	0.0429847	0.517446	-3.79663
CLIC1	0.404569	8.75753	2.2145	0.0430164	0.517446	-3.79724
ARIH1	0.424477	3.33883	2.21424	0.0430377	0.517446	-3.79766
MPL	0.35388	2.05197	2.21408	0.0430508	0.517446	-3.79791
ERBB2	0.44376	5.7226	2.21391	0.0430653	0.517446	-3.79819
FXYD6P3	0.364042	4.55672	2.21334	0.0431116	0.517446	-3.79909
HNRNPA1P6	0.546893	4.9995	2.21327	0.0431174	0.517446	-3.7992
TMEM87A	0.391205	5.59872	2.21203	0.0432193	0.517768	-3.80116
WDR36	0.448857	3.59126	2.21202	0.04322	0.517768	-3.80118
FABP5	0.704496	8.1437	2.21109	0.0432964	0.517774	-3.80265
WDR97	0.373154	2.96487	2.21073	0.0433263	0.517905	-3.80322
RPL12P12	0.508945	7.94472	2.21007	0.0433804	0.518197	-3.80426
ARPC5L	0.507942	4.45585	2.20983	0.0434005	0.518197	-3.80465
RPRM	0.366137	3.61469	2.20974	0.0434077	0.518197	-3.80479
ZDHHC20	0.34807	6.00063	2.20866	0.0434973	0.518587	-3.8065
LYPLA1	0.434192	3.38036	2.2082	0.0435354	0.518815	-3.80723
WSCD2	0.411827	3.22539	2.20762	0.0435828	0.518834	-3.80814
PFN1	0.371919	9.55674	2.20758	0.0435867	0.518834	-3.80821
TNNI3K	0.478005	3.00924	2.20749	0.0435941	0.518834	-3.80835
NEU1	0.495629	5.40921	2.20534	0.0437721	0.520125	-3.81175
SH3BP1	0.355864	4.37876	2.20524	0.043781	0.520125	-3.81191
PKD1L1	0.38042	2.68013	2.20523	0.043782	0.520125	-3.81193
FAM204A	0.371849	6.11419	2.20475	0.0438213	0.520162	-3.81268
RPL14P1	0.43976	8.6445	2.2034	0.0439341	0.520528	-3.81482
RPL9P3	0.470636	6.82684	2.20303	0.0439652	0.520528	-3.81541
RPL7P32	0.379587	4.56593	2.202	0.044051	0.521092	-3.81703
HPS3	0.359433	5.57553	2.20157	0.0440871	0.521151	-3.81772
UCHL5	0.491037	6.40684	2.20146	0.0440962	0.521151	-3.81789
GDF15	0.425247	5.371	2.20068	0.0441615	0.521495	-3.81912
SMYD2	0.416352	3.30538	2.20033	0.0441915	0.521624	-3.81968
SNORD83A	0.395332	5.80175	2.19854	0.044342	0.522751	-3.82251
KRT19P3	0.346119	2.58606	2.19828	0.0443635	0.522751	-3.82292
DBF4	0.315258	3.82876	2.19805	0.0443833	0.522751	-3.82329
AKAP1	0.470457	7.74691	2.19766	0.044416	0.522751	-3.8239
PIK3CG	0.382193	3.48416	2.19755	0.0444248	0.522751	-3.82406
TMEM234	0.466297	2.95957	2.19725	0.0444505	0.522751	-3.82454
PRMT6	0.400943	2.44388	2.19711	0.0444622	0.522751	-3.82476
POLH	0.487163	5.30834	2.19456	0.0446775	0.523886	-3.82878
KRT8	0.37352	7.60868	2.19375	0.0447464	0.524095	-3.83006
TMEM237	0.402593	4.61946	2.19318	0.0447949	0.524282	-3.83096
ZNF93	0.430227	4.83784	2.19311	0.0448007	0.524282	-3.83107
MYCNUT	0.312011	4.33936	2.19141	0.0449458	0.525346	-3.83376
DBI	0.494412	6.69352	2.19101	0.0449802	0.525346	-3.8344
C1QTNF3-AMACR	0.562502	4.37556	2.19055	0.045019	0.525346	-3.83512
SDHAF2	0.540606	6.24502	2.18988	0.0450763	0.525435	-3.83617
ASAH2B	0.393791	4.1103	2.1897	0.0450917	0.525435	-3.83646
UQCRC1	0.358358	4.31565	2.18901	0.045151	0.525902	-3.83755
MRPS9	0.392519	3.05325	2.18843	0.0452007	0.526065	-3.83846
OR4Q3	0.328096	3.27724	2.18765	0.045267	0.526183	-3.83968
MSTO1	0.477853	6.33181	2.18734	0.0452942	0.526183	-3.84018
RAN	0.52855	6.64074	2.1871	0.0453142	0.526183	-3.84055
CYP2T1P	0.330275	2.78944	2.18693	0.0453294	0.526183	-3.84083
ZNF518A	0.56262	3.49799	2.18649	0.0453672	0.526398	-3.84152
PHACTR4	0.379294	5.60983	2.18594	0.0454145	0.526499	-3.84239
RPN1	0.44141	9.35615	2.18483	0.0455097	0.527042	-3.84413
PRPS1	0.62651	5.36286	2.18427	0.0455583	0.527048	-3.84501
DLG3	0.452918	5.41365	2.18377	0.0456018	0.527327	-3.84581
HEXB	0.647663	7.1425	2.18345	0.0456294	0.527423	-3.84631
RPL7AP38	0.354701	2.30914	2.18252	0.0457094	0.527826	-3.84777
RAB25	0.631003	4.24629	2.18236	0.0457237	0.527826	-3.84803
ANKEF1	0.566317	2.82489	2.18192	0.0457617	0.527826	-3.84872
GMPS	0.349652	6.06535	2.18159	0.0457903	0.527826	-3.84924
SPINK5	0.336955	2.72324	2.18126	0.0458189	0.527826	-3.84976
PHAX	0.580473	4.48316	2.18079	0.0458599	0.528011	-3.8505
NDUFB4P8	0.375473	3.31047	2.18052	0.0458833	0.528011	-3.85092
PCDH10	0.379435	2.17335	2.17986	0.0459408	0.528103	-3.85196
LRPAP1	0.340092	4.84138	2.17954	0.0459682	0.528103	-3.85246
NHEJ1	0.470018	6.31591	2.1792	0.0459977	0.528103	-3.85299
BPY2C	0.360602	1.95465	2.17775	0.0461247	0.529116	-3.85528
ANXA9	0.405831	4.89285	2.17626	0.0462548	0.529672	-3.85762
PKP2	0.427627	5.75748	2.17623	0.0462573	0.529672	-3.85767
RPL36AP13	0.42153	7.56423	2.17566	0.046307	0.529672	-3.85856
UGT2B17	0.763946	3.21625	2.17564	0.0463088	0.529672	-3.85859
HTATSF1	0.349427	3.86952	2.17564	0.046309	0.529672	-3.85859
NEIL3	0.465994	4.05676	2.17483	0.0463806	0.530021	-3.85988
RPS12	0.40227	10.3627	2.17461	0.0463995	0.530021	-3.86022
TMEM183B	0.406134	5.66355	2.17421	0.046435	0.530021	-3.86085
UQCRB	0.683872	6.24275	2.17413	0.0464417	0.530021	-3.86097
CEBPZ	0.583914	5.32121	2.17365	0.0464838	0.530021	-3.86172
MATN1	0.325448	2.44114	2.17319	0.0465246	0.530139	-3.86245
LPXN	0.424527	2.98636	2.17287	0.0465527	0.53023	-3.86295
ZNF776	0.438198	4.50988	2.1725	0.0465851	0.53023	-3.86353
PDCD11	0.6238	4.6885	2.17054	0.0467587	0.531162	-3.86662
RPL21P134	0.496246	5.62358	2.17049	0.0467623	0.531162	-3.86668
DYNLL2	0.423942	5.15748	2.17041	0.0467699	0.531162	-3.86682
GFRAL	0.351925	1.88822	2.16988	0.0468169	0.531475	-3.86765
UBA2	0.447986	5.67704	2.16936	0.0468628	0.531774	-3.86847
NACAP7	0.313101	2.86453	2.16815	0.0469698	0.532333	-3.87036
SSR3	0.444401	7.2832	2.16756	0.0470222	0.532333	-3.87128
RPSAP53	0.378362	5.74514	2.16746	0.0470311	0.532333	-3.87144
NCL	0.399748	6.47663	2.16741	0.0470362	0.532333	-3.87153
MTCO1P12	0.372919	12.0928	2.16738	0.0470384	0.532333	-3.87157
NANS	0.326446	5.72709	2.16699	0.0470737	0.532333	-3.87219
TOMM20	0.489653	6.80395	2.16676	0.0470936	0.532333	-3.87254
RPL23AP42	0.569615	9.33401	2.16645	0.0471212	0.532333	-3.87303
RPL35P8	0.351883	4.7866	2.16612	0.0471512	0.532333	-3.87356
EEF1G	0.416885	11.1058	2.16577	0.0471821	0.532333	-3.8741
RPL23AP65	0.557156	7.06473	2.1653	0.047224	0.532333	-3.87484
PUS7L	0.552392	5.56716	2.16509	0.0472428	0.532333	-3.87517
RPL12P47	0.447268	6.78648	2.16371	0.0473664	0.533107	-3.87734
MRRF	0.461891	4.12012	2.16356	0.0473797	0.533107	-3.87757
CUTC	0.409915	3.64552	2.16344	0.0473903	0.533107	-3.87776
PDZK1IP1	0.698925	6.29868	2.16265	0.0474612	0.533305	-3.87899
RNF128	0.71218	3.64113	2.1626	0.0474651	0.533305	-3.87906
MAGT1	0.448051	5.72043	2.16231	0.0474914	0.533305	-3.87952
GPR101	0.330141	3.27707	2.1623	0.0474928	0.533305	-3.87955
IFNA2	0.306672	2.34885	2.16055	0.0476493	0.53426	-3.88228
BCR	0.509884	3.63632	2.1601	0.0476906	0.534503	-3.883
HINT1	0.420825	6.76549	2.15894	0.0477944	0.535067	-3.8848
MRPL45	0.438482	3.92553	2.15871	0.0478157	0.535067	-3.88517
RPS26P11	0.375181	10.5458	2.15867	0.0478194	0.535067	-3.88523
RPS17P2	0.341039	8.49493	2.15802	0.0478782	0.5351	-3.88625
CEP41	0.439112	2.64156	2.15785	0.0478932	0.5351	-3.88651
RPL13AP25	0.353572	7.62264	2.15777	0.0479007	0.5351	-3.88664
TMA16P2	0.384243	4.37631	2.15681	0.0479877	0.53551	-3.88815
RPL23	0.448297	9.92964	2.15671	0.0479963	0.53551	-3.8883
CCNT2	0.510757	4.94072	2.15521	0.0481331	0.536081	-3.89066
OACYLP	0.749235	3.81924	2.15444	0.0482027	0.536081	-3.89185
P4HB	0.514086	5.68799	2.15369	0.0482714	0.536081	-3.89303
ACAT2	0.369516	4.68425	2.15358	0.0482811	0.536081	-3.8932
GINS2	0.401304	3.98707	2.15355	0.0482836	0.536081	-3.89325
SLC28A2	0.346416	4.86406	2.15323	0.0483129	0.536081	-3.89375
PSMB5	0.441843	4.31666	2.15314	0.0483207	0.536081	-3.89388
CENPN	0.434832	3.88109	2.15307	0.048327	0.536081	-3.89399
SCHLAP1	0.347739	2.12241	2.15265	0.048366	0.536081	-3.89466
RPS3AP29	0.497234	4.07757	2.1526	0.0483705	0.536081	-3.89474
NDUFB2	0.612227	6.87706	2.15153	0.0484685	0.536613	-3.89641
POLDIP3	0.326526	5.5705	2.1512	0.0484979	0.53672	-3.89692
RMI1	0.457797	4.23631	2.15083	0.0485322	0.536883	-3.8975
RPL39P40	0.425908	3.34766	2.15011	0.0485979	0.537272	-3.89862
MTND4LP7	0.314171	2.39981	2.14997	0.0486112	0.537272	-3.89885
RPL23A	0.497173	11.0301	2.1498	0.0486265	0.537272	-3.89911
RPL41P1	0.355684	8.68142	2.1495	0.048654	0.537359	-3.89958
FAM71C	0.348411	2.11404	2.14859	0.0487379	0.537483	-3.90101
ZNF770	0.415353	4.34439	2.14852	0.0487445	0.537483	-3.90112
DENND1A	0.404315	5.77572	2.14813	0.0487801	0.537483	-3.90173
SNORA44	0.40265	6.10201	2.14806	0.0487866	0.537483	-3.90184
OR10J3	0.356184	3.90093	2.14742	0.048845	0.537512	-3.90283
MTND5P11	0.396669	3.52888	2.1471	0.0488753	0.537628	-3.90334
SSB	0.553723	6.69752	2.14552	0.0490208	0.537866	-3.90581
ARL6	0.406002	2.15836	2.14551	0.0490211	0.537866	-3.90581
CD9	0.525889	5.26521	2.14551	0.0490214	0.537866	-3.90581
ATP6V0D2	0.351163	4.46553	2.14511	0.0490585	0.537866	-3.90644
SMAD5-AS1	0.343892	2.66411	2.14468	0.0490983	0.537866	-3.90711
ARHGAP44	0.436958	2.95093	2.1446	0.0491054	0.537866	-3.90723
RPL7P11	0.408897	4.4753	2.14395	0.0491661	0.537866	-3.90826
FMO5	0.54718	3.33303	2.14321	0.0492345	0.537866	-3.90941
ANXA3	0.397976	4.43998	2.14317	0.0492386	0.537866	-3.90948
MRGPRX2	0.343584	2.97902	2.14315	0.0492402	0.537866	-3.9095
UBA5	0.377694	2.96283	2.14292	0.0492615	0.537866	-3.90986
SRSF7	0.60754	3.772	2.14281	0.0492713	0.537866	-3.91003
VNN1	0.577282	2.32574	2.14239	0.0493105	0.53808	-3.91069
RPS6	0.40433	10.9005	2.14046	0.0494899	0.538796	-3.91369
LSM12	0.559104	5.89931	2.14032	0.0495029	0.538796	-3.91391
STPG2	0.332808	2.18574	2.13978	0.0495541	0.538796	-3.91477
CCT5	0.55463	3.65399	2.13951	0.049579	0.538796	-3.91519
RPS5P3	0.36606	4.58961	2.13892	0.0496339	0.538796	-3.9161
GLO1	0.548938	3.66625	2.13886	0.0496394	0.538796	-3.91619
BNIP3P4	0.641607	6.24522	2.13872	0.0496524	0.538796	-3.91641
MMADHC	0.44767	3.97947	2.13799	0.0497208	0.539155	-3.91755
TMUB1	0.394189	4.70286	2.13775	0.0497433	0.539155	-3.91792
RABEPK	0.430938	3.56096	2.13634	0.049876	0.54005	-3.92013
SDHCP2	0.384253	3.10826	2.13512	0.049991	0.54005	-3.92204
SLC25A3P2	0.361835	4.56307	2.1351	0.0499923	0.54005	-3.92206
TPK1	0.590665	4.81169	2.135	0.0500018	0.54005	-3.92222
RGMB	0.464548	4.60879	2.13412	0.050085	0.54005	-3.92359
TM4SF1	0.429844	7.0801	2.13336	0.0501566	0.54005	-3.92478
GCSHP4	0.398074	2.63342	2.13303	0.0501875	0.54005	-3.92528
TBC1D15	0.468417	3.83624	2.13286	0.0502036	0.54005	-3.92555
OR5AN1	0.312514	1.84127	2.13269	0.0502192	0.54005	-3.92581
BRD7	0.331525	5.35604	2.13178	0.0503061	0.540518	-3.92724
S100A6	0.527218	7.49715	2.13043	0.0504341	0.540745	-3.92934
OBSCN	0.355229	4.4883	2.13025	0.0504506	0.540745	-3.92961
CA3	0.326843	4.07952	2.13019	0.0504565	0.540745	-3.92971
TCTA	0.360848	8.06289	2.12978	0.0504958	0.540789	-3.93035
RPL21P11	0.34683	8.3471	2.1295	0.0505219	0.540789	-3.93078
FKBP9	0.388071	4.21289	2.12942	0.0505293	0.540789	-3.9309
NDUFB9P2	0.341178	4.28359	2.12876	0.0505919	0.540804	-3.93193
KRT18P50	0.397481	3.82632	2.12833	0.0506337	0.540804	-3.93261
ASS1P11	0.337823	3.95594	2.12819	0.0506467	0.540804	-3.93282
PRAMEF35P	0.393296	2.84501	2.12788	0.0506761	0.540804	-3.9333
RPS6KA5	0.440621	3.03583	2.1277	0.0506937	0.540804	-3.93359
IFNA8	0.318726	2.42578	2.12733	0.0507288	0.540804	-3.93416
GGT4P	0.313093	4.09871	2.1269	0.05077	0.540876	-3.93483
ZNF397	0.346117	5.07069	2.12647	0.0508106	0.540876	-3.9355
PARPBP	0.553087	3.80678	2.12464	0.0509854	0.541959	-3.93834
C1orf146	0.330246	1.60338	2.12453	0.050996	0.541959	-3.93851
LYAR	0.383059	5.17438	2.12381	0.0510657	0.541999	-3.93964
YY1	0.396139	7.15638	2.12343	0.0511014	0.541999	-3.94022
RPL22	0.408451	10.0019	2.12334	0.0511106	0.541999	-3.94037
GOLT1A	0.467321	4.63193	2.12305	0.0511383	0.541999	-3.94081
GALNT7	0.466525	3.93277	2.1227	0.0511718	0.542139	-3.94136
DUSP16	0.430032	6.47193	2.12233	0.0512073	0.542272	-3.94193
MGME1	0.382087	4.78536	2.12216	0.0512241	0.542272	-3.9422
SLIRP	0.742569	6.13496	2.12139	0.0512981	0.542845	-3.94339
RPL23AP69	0.356997	2.62912	2.12102	0.051334	0.543015	-3.94397
RPL13AP2	0.315786	6.83618	2.11871	0.0515566	0.544267	-3.94755
SMC5	0.316515	5.71897	2.1185	0.0515771	0.544267	-3.94788
ATG4D	0.489637	5.40929	2.11805	0.0516208	0.544267	-3.94858
C12orf56	0.34574	2.2701	2.11789	0.0516361	0.544267	-3.94882
SPRR1A	0.395058	5.20161	2.11763	0.0516612	0.544267	-3.94923
RPS27P29	0.414612	8.00245	2.11762	0.0516622	0.544267	-3.94924
FKBP11	0.418917	3.79867	2.11748	0.0516762	0.544267	-3.94947
TPM3	0.389775	8.19656	2.11732	0.0516916	0.544267	-3.94971
LNX1	0.610409	3.50333	2.11711	0.0517121	0.544273	-3.95004
RBBP4P4	0.394176	3.3172	2.11646	0.0517749	0.544342	-3.95104
PIWIL2	0.303757	2.80796	2.11641	0.0517801	0.544342	-3.95113
CSTF1	0.393952	2.94666	2.11592	0.0518278	0.544342	-3.95189
SNORD92	0.594492	5.95793	2.11556	0.0518624	0.544342	-3.95244
ATG5	0.412679	4.06212	2.11512	0.0519056	0.544342	-3.95313
ACVRL1	0.388451	5.25222	2.11477	0.05194	0.544342	-3.95367
HPRT1	0.329525	2.63467	2.11463	0.0519535	0.544342	-3.95389
SMPX	0.311588	3.11419	2.11428	0.051988	0.544342	-3.95444
RPSAP47	0.504872	5.33005	2.11359	0.0520551	0.544342	-3.9555
PPBPP2	0.363078	3.61397	2.11356	0.0520577	0.544342	-3.95554
ARL14	0.450754	2.85316	2.11206	0.0522046	0.54567	-3.95787
ARHGAP42	0.355363	3.51377	2.11093	0.0523157	0.546453	-3.95963
MT1JP	0.353836	4.67295	2.11022	0.0523854	0.546723	-3.96073
HIGD1AP18	0.406453	2.96136	2.10968	0.0524379	0.546875	-3.96156
SKA3	0.354919	4.1364	2.10942	0.0524643	0.546875	-3.96197
SLC19A1	0.369076	3.91972	2.10875	0.0525302	0.546875	-3.96301
CEBPG	0.400044	6.85162	2.10873	0.0525317	0.546875	-3.96303
CALM2	0.388004	7.22797	2.10864	0.0525402	0.546875	-3.96317
FAM177A1	0.411899	1.99441	2.10726	0.0526766	0.547278	-3.96531
PCBP2	0.405818	8.61874	2.10658	0.0527443	0.547278	-3.96637
ADAM5	0.448493	1.98297	2.1065	0.0527522	0.547278	-3.96649
MRPS10P1	0.425816	2.38012	2.1058	0.0528207	0.547646	-3.96757
PDCD5P1	0.397312	5.31115	2.10566	0.0528349	0.547646	-3.96779
OR8D4	0.343335	1.91544	2.10485	0.0529156	0.548274	-3.96905
TMEM258	0.532526	7.23418	2.10422	0.0529775	0.54857	-3.97001
LRRC75A	0.351401	3.64615	2.10364	0.0530358	0.54857	-3.97092
PSMB3	0.607132	7.32309	2.1033	0.0530696	0.54857	-3.97145
SSU72P5	0.322256	2.79499	2.10278	0.0531207	0.54857	-3.97224
LNX2	0.379858	5.7217	2.10254	0.053145	0.54857	-3.97262
RPL9P7	0.376995	10.6245	2.10204	0.0531949	0.54857	-3.9734
LDHAL6CP	0.32319	2.77496	2.1016	0.0532386	0.54857	-3.97407
HM13	0.497461	6.67077	2.10146	0.0532523	0.54857	-3.97429
UQCRHL	0.629041	4.96828	2.10139	0.0532598	0.54857	-3.9744
ALG1	0.426201	6.75148	2.10086	0.0533119	0.54857	-3.97521
MT1A	0.422588	5.39873	2.10078	0.0533203	0.54857	-3.97534
CWH43	0.420356	2.21914	2.10061	0.0533378	0.54857	-3.97561
RPL5	0.520032	5.58717	2.10051	0.0533478	0.54857	-3.97576
RPS25	0.430982	9.08919	2.10006	0.053392	0.54857	-3.97645
PABPC3	0.430141	5.09772	2.09952	0.0534464	0.54857	-3.97729
CEP44	0.433735	3.32585	2.09946	0.0534522	0.54857	-3.97738
RPSAP46	0.315993	5.3439	2.0991	0.053488	0.54857	-3.97793
SMKR1	0.384519	3.93651	2.09901	0.053497	0.54857	-3.97807
NEPNP	0.381034	3.91319	2.09882	0.0535165	0.54857	-3.97837
NAT10	0.475275	2.94238	2.09779	0.0536197	0.54857	-3.97996
UBE2V1P2	0.518083	8.82791	2.09769	0.0536298	0.54857	-3.98012
KIF24	0.334297	4.53511	2.09767	0.053632	0.54857	-3.98015
NOXA1	0.362758	4.97618	2.09682	0.0537176	0.54857	-3.98147
UBALD2	0.328732	5.76363	2.09662	0.0537378	0.54857	-3.98178
EIF4H	0.416869	4.94104	2.09623	0.0537761	0.54857	-3.98236
LMO7DN	0.334683	6.39997	2.09573	0.0538265	0.54857	-3.98314
TMC5	0.540898	3.93996	2.09513	0.0538871	0.54857	-3.98407
SDHAF3	0.404534	4.59319	2.0934	0.0540626	0.549776	-3.98675
RELN	0.449636	3.03977	2.09335	0.0540674	0.549776	-3.98682
RPSAP49	0.419012	5.11772	2.09227	0.0541765	0.550155	-3.98849
MAP4K3	0.499427	5.83274	2.09208	0.0541957	0.550155	-3.98878
GBA2	0.317642	4.543	2.09138	0.0542668	0.550369	-3.98986
NDUFA1	0.558212	8.43655	2.09075	0.0543305	0.55081	-3.99083
EPN3	0.408043	3.03196	2.08954	0.0544536	0.551853	-3.99269
PDE9A	0.36452	3.79577	2.08893	0.0545159	0.551928	-3.99364
PLA2G2F	0.345277	4.03753	2.08888	0.0545211	0.551928	-3.99371
NAA15	0.420362	5.22129	2.0886	0.0545501	0.551928	-3.99415
ERHP1	0.492037	4.74717	2.08854	0.0545554	0.551928	-3.99423
SOWAHC	0.319819	3.96098	2.08796	0.0546151	0.551928	-3.99513
GPCPD1	0.339992	2.00242	2.08783	0.0546285	0.551928	-3.99534
PAK2	0.416079	5.03878	2.08775	0.054637	0.551928	-3.99546
NDUFAF4	0.415497	4.13239	2.08759	0.0546526	0.551928	-3.9957
KRT16P5	0.36239	4.86632	2.08596	0.0548197	0.551928	-3.99822
RPL23P10	0.449243	6.09248	2.08591	0.0548252	0.551928	-3.9983
DISP1	0.303152	4.72262	2.0848	0.0549386	0.551928	-4
DEFB112	0.403559	2.58418	2.08478	0.054941	0.551928	-4.00004
SERPINB9	0.43875	4.87053	2.08472	0.0549465	0.551928	-4.00012
FMNL2	0.440871	3.8133	2.08431	0.0549886	0.551928	-4.00075
UBE2C	0.393713	6.18469	2.08382	0.0550396	0.551928	-4.00152
PSMA7	0.419349	5.6839	2.08381	0.0550408	0.551928	-4.00154
DNAJC21	0.468798	5.0835	2.0838	0.0550409	0.551928	-4.00154
GOLGA6D	0.360922	5.14141	2.08294	0.0551296	0.551928	-4.00287
DNM2	0.348736	6.90685	2.0823	0.0551962	0.551928	-4.00386
PHLPP1	0.501798	6.82076	2.08226	0.0551996	0.551928	-4.00391
KRT17P7	0.307608	4.2129	2.08186	0.0552416	0.551928	-4.00454
NCAPG2	0.304128	3.23435	2.08185	0.0552418	0.551928	-4.00454
RPS19P1	0.34685	6.28928	2.08174	0.0552535	0.551928	-4.00472
LTB4R	0.407171	2.74944	2.08097	0.0553327	0.551928	-4.00589
DNASE2	0.32423	3.61641	2.08049	0.0553826	0.551928	-4.00664
MSI2	0.456651	5.00422	2.08038	0.0553937	0.551928	-4.0068
ACACA	0.38631	4.94369	2.08005	0.0554283	0.551928	-4.00732
MRPS7	0.504293	6.11737	2.07915	0.0555214	0.551928	-4.0087
ZNF91	0.430227	4.30555	2.0785	0.0555892	0.551928	-4.00971
PTPRA	0.391749	6.77164	2.07835	0.0556041	0.551928	-4.00993
GOSR2	0.534138	3.55762	2.07746	0.0556973	0.551928	-4.01131
SUB1P3	0.358528	3.13152	2.07709	0.0557358	0.551928	-4.01188
FAM72A	0.355392	2.01937	2.07667	0.0557788	0.551928	-4.01251
RTN4	0.399561	6.07629	2.07657	0.055789	0.551928	-4.01266
SMIM24	0.727241	4.97324	2.07651	0.0557956	0.551928	-4.01276
AASDHPPT	0.496109	5.38913	2.07573	0.0558773	0.551928	-4.01397
LRRC37A11P	0.409169	3.09514	2.07571	0.0558793	0.551928	-4.01399
CLTC	0.409212	5.59018	2.07562	0.0558883	0.551928	-4.01413
RPL23AP54	0.360056	3.0386	2.07543	0.0559082	0.551928	-4.01442
MAN2A1	0.463818	4.11959	2.07543	0.0559083	0.551928	-4.01442
ZNF780A	0.392727	4.7922	2.07522	0.0559305	0.551928	-4.01475
PIGK	0.434288	3.39651	2.07503	0.0559499	0.551928	-4.01503
LTV1	0.4231	5.03418	2.07489	0.0559647	0.551928	-4.01525
PPA1	0.46223	5.67384	2.07446	0.05601	0.551928	-4.01592
CCT8	0.512181	3.25119	2.07435	0.0560215	0.551928	-4.01609
RPS15AP18	0.322991	2.72872	2.07412	0.0560447	0.551928	-4.01643
GDF11	0.302618	2.33212	2.07379	0.0560793	0.551928	-4.01694
ANKRD53	0.355391	3.51239	2.07324	0.0561367	0.551928	-4.01778
RPS11P5	0.374177	5.35095	2.07316	0.0561459	0.551928	-4.01791
PHKB	0.327181	4.1121	2.07298	0.0561645	0.551928	-4.01819
RASEF	0.50437	4.81549	2.07291	0.0561714	0.551928	-4.01829
ARL6IP1P3	0.3159	3.41855	2.07265	0.0561988	0.551928	-4.01869
CCSAP	0.435318	3.89996	2.07263	0.0562017	0.551928	-4.01873
PRAP1	0.746019	4.5119	2.07225	0.0562415	0.551943	-4.01932
SUMO2P1	0.360581	10.3176	2.07112	0.05636	0.552907	-4.02105
NOX1	0.574984	4.47796	2.07066	0.0564083	0.55309	-4.02175
MSH5	0.497717	5.09696	2.07036	0.0564394	0.55309	-4.02221
NEMP1	0.425373	5.10761	2.06997	0.0564801	0.553291	-4.0228
SEMG1	0.447552	3.02662	2.06948	0.0565321	0.553403	-4.02356
ASNSP3	0.368419	1.83246	2.06868	0.056617	0.554034	-4.02479
LARGE-IT1	0.460562	4.0395	2.06817	0.056671	0.554149	-4.02558
RPS3	0.431066	10.7386	2.06759	0.0567318	0.554244	-4.02646
HKDC1	0.383397	3.09616	2.06719	0.0567737	0.554244	-4.02707
RNF126P1	0.449013	3.69318	2.06583	0.0569183	0.554856	-4.02916
RPL35P5	0.493077	5.93212	2.06559	0.0569436	0.554856	-4.02953
CAMK2G	0.374927	5.41651	2.06532	0.0569726	0.554856	-4.02995
MTCYBP3	0.335869	6.04422	2.06434	0.0570762	0.554856	-4.03144
GLRA4	0.338108	2.97726	2.06415	0.0570969	0.554856	-4.03174
RPL23AP19	0.510223	4.50664	2.06413	0.0570985	0.554856	-4.03176
ARL4AP2	0.351309	3.63828	2.06351	0.057165	0.554856	-4.03272
NUTM2D	0.342462	3.10107	2.06301	0.057218	0.554856	-4.03348
SNAR-A1	0.503086	10.1019	2.06294	0.0572255	0.554856	-4.03359
SNAR-A9	0.503086	10.1019	2.06294	0.0572255	0.554856	-4.03359
NKX2-1	0.360615	4.0162	2.0629	0.0572293	0.554856	-4.03365
RPS27P15	0.529987	5.0261	2.0613	0.0574	0.555871	-4.0361
CASP3P1	0.34394	2.48179	2.06116	0.0574155	0.555871	-4.03632
LYPD8	0.569443	5.24268	2.06008	0.0575313	0.556159	-4.03798
CPSF3	0.30644	3.77237	2.05932	0.0576123	0.556159	-4.03913
EPX	0.406708	3.44409	2.05879	0.0576693	0.556159	-4.03995
RPS4XP13	0.421269	5.08447	2.05843	0.0577079	0.556335	-4.0405
DCAF16	0.404029	5.35583	2.05784	0.0577715	0.556752	-4.0414
RPS20P4	0.53049	3.54527	2.05691	0.0578712	0.557319	-4.04282
RPL10P14	0.376973	5.92648	2.05616	0.0579526	0.557655	-4.04398
YWHAQ	0.380134	9.58467	2.05602	0.0579674	0.557655	-4.04419
HAND2-AS1	0.349992	2.87486	2.05517	0.0580586	0.557766	-4.04548
NEK11	0.492162	2.01734	2.05501	0.0580765	0.557766	-4.04573
RPL35AP22	0.343229	2.44589	2.05497	0.0580811	0.557766	-4.0458
RPS26	0.43673	9.94457	2.05449	0.058133	0.558068	-4.04653
CDHR1	0.649504	3.80518	2.05362	0.0582265	0.558317	-4.04785
C1orf194	0.326424	2.58309	2.05254	0.0583433	0.558901	-4.0495
TRA2A	0.37128	5.19315	2.05172	0.0584327	0.559177	-4.05076
SRPRB	0.350956	3.47936	2.05145	0.0584624	0.559264	-4.05118
DDX11L5	0.308579	5.45903	2.05086	0.0585259	0.559676	-4.05207
GTF2F2	0.409589	6.55818	2.05009	0.05861	0.560087	-4.05325
PPAT	0.388562	6.45312	2.04958	0.058666	0.560356	-4.05403
ATP6V1H	0.352691	2.42437	2.0489	0.05874	0.560361	-4.05507
NIFKP6	0.34288	3.33196	2.04881	0.0587494	0.560361	-4.0552
ZNF503-AS1	0.571079	4.81315	2.04856	0.0587768	0.560361	-4.05558
NUSAP1	0.455377	4.8555	2.04851	0.0587823	0.560361	-4.05566
PCGEM1	0.34887	2.85057	2.0476	0.0588819	0.560563	-4.05705
NCBP2	0.345764	5.86673	2.04748	0.0588957	0.560563	-4.05724
COX7A2	0.334255	6.01453	2.04738	0.0589061	0.560563	-4.05739
DHCR24	0.384623	3.95423	2.04577	0.0590826	0.56185	-4.05985
PARP1	0.366275	3.76864	2.04549	0.0591136	0.56195	-4.06028
RPSAP39	0.354602	4.75995	2.04218	0.0594781	0.564598	-4.06533
SUPT4H1P2	0.363141	4.22628	2.04183	0.0595167	0.564598	-4.06586
ST13P4	0.33322	5.33322	2.04164	0.0595369	0.564598	-4.06614
UBA52	0.374206	8.89954	2.04084	0.0596255	0.564849	-4.06736
RPL17P33	0.401197	2.82905	2.03904	0.0598258	0.56568	-4.07011
TFCP2L1	0.37413	4.63836	2.03893	0.0598376	0.56568	-4.07027
GTPBP1	0.304815	3.89718	2.0379	0.0599517	0.566412	-4.07184
RPS20P10	0.492281	8.72029	2.0373	0.0600192	0.566412	-4.07276
RPS20P14	0.575342	6.38728	2.03673	0.0600825	0.566412	-4.07363
DHX9P1	0.366748	3.82574	2.03667	0.0600885	0.566412	-4.07371
PRSS3P3	0.320821	5.15737	2.03605	0.0601578	0.566412	-4.07465
GTF2I	0.345494	5.84563	2.0356	0.0602079	0.566412	-4.07534
UROS	0.395513	4.71351	2.03537	0.0602342	0.566412	-4.0757
BCAP31	0.314922	4.13541	2.03496	0.0602802	0.566412	-4.07632
DDX39B	0.384198	4.18499	2.03494	0.0602817	0.566412	-4.07634
HEATR5B	0.381528	3.71198	2.03491	0.0602857	0.566412	-4.0764
GAK	0.37727	4.78705	2.0345	0.0603309	0.566412	-4.07701
RPL39P25	0.527294	4.67169	2.03443	0.0603395	0.566412	-4.07713
PTP4A1P4	0.324791	1.92593	2.03404	0.0603833	0.566412	-4.07772
HEATR6	0.381433	5.35237	2.03364	0.0604273	0.566412	-4.07832
FBRSL1	0.39202	5.26934	2.03354	0.0604384	0.566412	-4.07847
SCLT1	0.373797	3.52395	2.03325	0.0604715	0.566412	-4.07892
SMG7-AS1	0.306305	2.53714	2.03316	0.060482	0.566412	-4.07906
EMC8	0.474658	4.21541	2.03279	0.0605229	0.566412	-4.07962
PIGUP1	0.388814	4.17503	2.03265	0.0605384	0.566412	-4.07983
ARFGAP2	0.335172	5.00253	2.0326	0.0605446	0.566412	-4.07991
MRPS21P1	0.319142	2.44969	2.03207	0.0606033	0.566412	-4.08071
SLC25A26	0.342305	4.7888	2.03113	0.0607094	0.566412	-4.08214
FAM91A1	0.640287	5.41914	2.03106	0.0607179	0.566412	-4.08226
PDCD5	0.630517	7.3606	2.03104	0.0607193	0.566412	-4.08228
SNRNP200	0.327708	6.44281	2.03052	0.0607783	0.566412	-4.08307
MBOAT1	0.298934	4.98567	2.03048	0.0607829	0.566412	-4.08314
MRPL45P2	0.367953	4.22806	2.03012	0.0608235	0.566412	-4.08368
NARS2	0.334111	4.53601	2.02972	0.0608681	0.566412	-4.08429
OR2H1	0.360475	3.68475	2.02933	0.0609122	0.566412	-4.08488
FANCD2	0.432639	5.0325	2.0293	0.0609162	0.566412	-4.08493
COPZ1	0.468273	4.05012	2.02924	0.060923	0.566412	-4.08502
ZC3H15	0.321849	5.81889	2.02917	0.0609306	0.566412	-4.08513
DNPEP	0.408927	3.78227	2.02906	0.0609432	0.566412	-4.0853
SPECC1L	0.407511	3.5227	2.02833	0.0610251	0.566412	-4.0864
MTUS2-AS1	0.323009	3.65362	2.028	0.061063	0.566412	-4.08691
IFIH1	0.396627	2.25876	2.02791	0.0610724	0.566412	-4.08703
ARPC3	0.339495	7.44863	2.02786	0.061078	0.566412	-4.08711
RPL24P2	0.368958	5.70366	2.02753	0.0611153	0.566412	-4.08761
USH1C	0.338121	6.82173	2.02745	0.0611249	0.566412	-4.08774
GGH	0.588458	3.00436	2.02733	0.0611388	0.566412	-4.08792
CBWD1	0.518177	7.76606	2.02732	0.0611401	0.566412	-4.08794
MCM8	0.377379	2.44687	2.02714	0.0611597	0.566412	-4.0882
SERINC3	0.375093	6.33015	2.02666	0.0612142	0.566617	-4.08893
SNRPGP17	0.392967	3.41439	2.02556	0.0613386	0.567492	-4.0906
BRWD3	0.382645	4.3273	2.02463	0.0614454	0.567902	-4.09203
TMEM123	0.518949	9.0737	2.02444	0.0614665	0.567904	-4.09231
ATP8B1	0.642497	4.09558	2.02384	0.0615352	0.568316	-4.09322
KRTCAP2	0.415706	8.12595	2.02301	0.0616294	0.568786	-4.09448
RPL22P5	0.333627	3.49667	2.02242	0.0616971	0.568786	-4.09538
BRD7P1	0.429288	2.95314	2.02235	0.061705	0.568786	-4.09548
POTEF	0.398773	2.05329	2.02181	0.0617668	0.568786	-4.0963
KCMF1	0.354745	6.91152	2.02141	0.0618118	0.568786	-4.0969
MRPS10	0.33575	4.58927	2.02108	0.0618496	0.568786	-4.0974
EIF3H	0.48041	6.97897	2.02101	0.0618574	0.568786	-4.0975
RPL10AP5	0.324183	4.60824	2.02064	0.0618998	0.568786	-4.09806
SURF1	0.324059	4.63512	2.02034	0.0619345	0.568786	-4.09852
RAD1P2	0.341327	2.73506	2.02009	0.0619632	0.568786	-4.0989
SMIM8	0.328893	3.13341	2.02003	0.0619702	0.568786	-4.099
OR51J1	0.390996	3.00618	2.01996	0.0619786	0.568786	-4.09911
KBTBD11	0.413268	3.38798	2.01858	0.062137	0.569857	-4.1012
CCNK	0.448663	7.22163	2.0181	0.0621913	0.569972	-4.10191
RBL1	0.442643	4.22992	2.01763	0.0622453	0.570109	-4.10263
STRBP	0.44816	6.20265	2.01717	0.0622989	0.570109	-4.10333
SCAP	0.432437	7.76525	2.01619	0.0624116	0.570109	-4.10481
PFKFB4	0.410476	4.9857	2.01609	0.062424	0.570109	-4.10497
MRPL42	0.606569	5.48004	2.01542	0.0625005	0.570109	-4.10598
NUDT21	0.319543	4.08212	2.01537	0.062506	0.570109	-4.10605
PNO1	0.332223	2.89005	2.01444	0.0626138	0.570298	-4.10746
RPS3AP6	0.352202	6.58986	2.01434	0.0626253	0.570298	-4.10761
AHCYL2	0.358085	4.51044	2.01382	0.0626864	0.570298	-4.10841
NOL9	0.426529	4.99093	2.01369	0.0627014	0.570298	-4.10861
ZFAND1	0.409212	5.58185	2.01364	0.0627073	0.570298	-4.10868
CDX1	0.422648	5.80753	2.01292	0.0627899	0.570521	-4.10976
CEP72	0.40585	3.48116	2.01274	0.0628107	0.570521	-4.11003
COX6B1	0.356641	8.08707	2.0127	0.0628154	0.570521	-4.11009
MRPL50P4	0.328913	4.1965	2.01228	0.0628642	0.570628	-4.11073
EPS8L3	0.393844	4.68319	2.01189	0.0629097	0.570641	-4.11132
MRPL50	0.457902	6.28525	2.01157	0.0629471	0.570641	-4.11181
RPS28	0.340773	11.5583	2.0114	0.0629664	0.570641	-4.11206
TIMM8BP2	0.327228	6.27027	2.01034	0.0630897	0.570641	-4.11366
HSPE1P4	0.355209	3.56353	2.01029	0.0630961	0.570641	-4.11374
COPG1	0.335656	5.90076	2.01023	0.0631028	0.570641	-4.11383
DET1	0.356794	3.30159	2.01017	0.0631104	0.570641	-4.11393
OR51A2	0.302234	2.21534	2.00976	0.0631584	0.570641	-4.11455
PUS7	0.530017	2.38269	2.00918	0.0632259	0.570641	-4.11542
CECR2	0.326627	3.26802	2.00916	0.0632281	0.570641	-4.11545
MTND1P35	0.439394	2.46743	2.0091	0.0632353	0.570641	-4.11555
SNTG1	0.426628	3.07568	2.00848	0.0633068	0.570641	-4.11647
DMKN	0.660434	5.54845	2.00805	0.0633572	0.570641	-4.11712
C1orf131	0.534221	5.72871	2.00802	0.0633611	0.570641	-4.11717
ADORA2BP1	0.399333	2.51424	2.00765	0.063404	0.570641	-4.11773
EIF6	0.491106	5.67161	2.00765	0.0634047	0.570641	-4.11774
INTS7	0.400225	4.28685	2.00761	0.0634093	0.570641	-4.1178
TMC4	0.303542	6.05937	2.00736	0.0634382	0.570641	-4.11817
MXD1	0.340136	5.66774	2.00708	0.0634715	0.570641	-4.1186
DDX55P1	0.347624	2.7854	2.00698	0.0634834	0.570641	-4.11875
EML4	0.337291	6.45108	2.00686	0.0634974	0.570641	-4.11893
CHRNA10	0.502533	6.35447	2.00617	0.0635777	0.570799	-4.11997
YWHAEP4	0.295435	3.05082	2.00425	0.0638034	0.571509	-4.12287
CST8	0.330301	3.04757	2.00396	0.0638383	0.571634	-4.12331
TM6SF2	0.350505	4.76829	2.00333	0.0639118	0.572082	-4.12425
MTATP6P3	0.326468	1.98222	2.00244	0.0640174	0.572431	-4.12561
RPL23AP2	0.464725	9.3321	2.00194	0.0640758	0.572431	-4.12635
SUN3	0.359299	2.8562	2.0017	0.0641046	0.572431	-4.12672
RPS4XP3	0.407509	6.9875	2.00131	0.0641501	0.572431	-4.1273
ZNF326	0.359451	2.34272	2.00125	0.0641579	0.572431	-4.1274
NKRF	0.526653	3.34517	2.00083	0.0642069	0.572494	-4.12802
DNAJC19P6	0.305778	2.38404	1.9997	0.0643412	0.573096	-4.12973
CYCSP55	0.349866	4.34088	1.99906	0.0644173	0.573387	-4.1307
SLC11A2	0.555968	3.30466	1.99767	0.0645824	0.573917	-4.13279
SMPD2	0.531547	5.68726	1.99754	0.0645977	0.573917	-4.13299
CCNG1	0.33476	5.50625	1.99683	0.0646829	0.5743	-4.13406
MT1F	0.466197	6.1473	1.99511	0.0648882	0.575478	-4.13665
LARP4P	0.436256	2.98983	1.99485	0.0649194	0.575478	-4.13705
DIAPH2	0.512452	5.68202	1.9944	0.0649733	0.57569	-4.13773
RPL6P27	0.340507	8.28843	1.99397	0.065025	0.57569	-4.13837
CACTIN-AS1	0.337847	3.58424	1.9912	0.0653571	0.577476	-4.14254
NHLRC3	0.406423	5.11462	1.98991	0.0655119	0.578023	-4.14447
TAS2R40	0.312972	1.78795	1.98963	0.0655463	0.578023	-4.1449
BNIP3P7	0.777124	6.43395	1.98931	0.0655849	0.578023	-4.14538
MRPS23	0.410776	3.99192	1.98927	0.0655891	0.578023	-4.14543
MYBL2	0.398431	4.79194	1.98834	0.0657015	0.578267	-4.14683
MRPS30	0.322813	6.73159	1.98771	0.0657783	0.578406	-4.14779
MRPL49	0.294909	3.51098	1.98769	0.0657809	0.578406	-4.14782
SLC38A1	0.427153	6.20793	1.98702	0.0658614	0.578927	-4.14882
INTS8	0.522687	5.74298	1.98634	0.0659437	0.579278	-4.14984
KDF1	0.313722	4.54389	1.98592	0.0659956	0.579343	-4.15048
RBMX2	0.322174	4.69499	1.98504	0.0661025	0.579343	-4.1518
GLRX	0.362063	7.01245	1.98493	0.066115	0.579343	-4.15196
PRAMEF34P	0.314359	2.43755	1.98469	0.0661451	0.579343	-4.15233
SLC39A9	0.350158	4.50616	1.98454	0.0661634	0.579343	-4.15255
RPS20P1	0.299707	3.90425	1.98405	0.0662226	0.579547	-4.15328
FAU	0.338655	5.35981	1.98254	0.0664065	0.580357	-4.15555
PDIA3	0.461787	5.02464	1.98254	0.0664066	0.580357	-4.15555
DNAJC11	0.569478	2.96048	1.98191	0.0664841	0.580703	-4.1565
MCCC2	0.376503	4.17372	1.98169	0.0665101	0.580703	-4.15682
XIRP2	0.363953	2.86519	1.98142	0.0665439	0.580722	-4.15724
SF3B3	0.397262	3.85383	1.98083	0.0666161	0.580776	-4.15812
LMNTD2	0.295681	6.20353	1.98076	0.0666249	0.580776	-4.15823
YPEL4	0.367038	2.56299	1.98055	0.0666495	0.580806	-4.15853
PSMB2	0.436186	5.88458	1.97986	0.0667352	0.58134	-4.15958
ENPP7	0.431413	2.81793	1.97923	0.0668124	0.58134	-4.16052
DDX12P	0.327848	4.34234	1.97919	0.0668172	0.58134	-4.16058
RPL7P19	0.354475	4.11351	1.97829	0.0669269	0.581878	-4.16192
SNORA57	0.391508	6.11996	1.97817	0.0669424	0.581878	-4.16211
RPAP2	0.380395	3.38648	1.97746	0.0670295	0.581878	-4.16317
UTP18	0.586022	6.07516	1.97742	0.0670346	0.581878	-4.16323
PRRG1	0.356615	6.11059	1.97728	0.0670518	0.581878	-4.16344
EBNA1BP2	0.435151	4.67459	1.97693	0.0670949	0.581878	-4.16396
TATDN2P2	0.345645	3.70451	1.97676	0.0671164	0.581878	-4.16423
TMCC2	0.393209	2.82937	1.97662	0.0671333	0.581878	-4.16443
MUC5B	0.344374	5.49805	1.9757	0.0672462	0.581878	-4.1658
TRBV29OR9-2	0.465583	3.68944	1.97549	0.0672726	0.581878	-4.16612
S100A2	0.320828	5.10605	1.97483	0.0673538	0.581878	-4.16711
EIF4BP7	0.398913	6.31718	1.97444	0.067402	0.581878	-4.16769
EPPK1	0.567932	7.54196	1.97412	0.0674422	0.581878	-4.16818
USP26	0.358017	2.33666	1.97392	0.0674668	0.581878	-4.16847
CES3	0.512268	5.67174	1.97344	0.0675261	0.581878	-4.16919
RAC1P5	0.335541	4.90334	1.97342	0.0675287	0.581878	-4.16922
SNRPGP10	0.408768	7.76222	1.97319	0.0675577	0.581878	-4.16957
C14orf119	0.40293	4.6816	1.97311	0.067567	0.581878	-4.16968
ARFRP1	0.288613	6.06768	1.97268	0.0676207	0.581878	-4.17033
DNAJB11	0.374103	6.42546	1.97267	0.0676217	0.581878	-4.17034
RPL21P2	0.362814	5.72843	1.97196	0.0677105	0.581878	-4.17141
RCE1	0.338941	4.19545	1.97181	0.0677283	0.581878	-4.17163
STIP1P3	0.397205	4.79842	1.97177	0.0677334	0.581878	-4.17169
NUP153	0.446271	4.61087	1.97163	0.0677508	0.581878	-4.1719
COPS5P1	0.393957	2.82732	1.9716	0.0677542	0.581878	-4.17194
ANO10	0.573252	4.05273	1.9715	0.0677674	0.581878	-4.1721
NR5A2	0.548486	3.71812	1.97148	0.0677694	0.581878	-4.17212
FOXD4L4	0.363564	4.35516	1.97084	0.0678489	0.581878	-4.17308
TMCC3	0.486914	3.84943	1.9708	0.0678548	0.581878	-4.17315
CNTNAP2	0.370405	4.13132	1.97051	0.0678909	0.581878	-4.17358
ADH5P2	0.380607	3.01529	1.97045	0.0678981	0.581878	-4.17367
CNNM2	0.457216	5.0431	1.97032	0.0679143	0.581878	-4.17386
LRRC7	0.37021	1.82193	1.9697	0.0679908	0.581878	-4.17478
GCLC	0.411236	3.95523	1.96886	0.0680962	0.582068	-4.17605
SLC38A6	0.332471	2.62991	1.96855	0.0681348	0.582068	-4.17651
CSNK2A1	0.428928	9.10144	1.96831	0.0681648	0.582068	-4.17687
SH3GL3	0.301466	1.74592	1.96824	0.0681737	0.582068	-4.17697
THNSL1	0.357002	5.02866	1.96794	0.0682106	0.582068	-4.17741
MTND3P22	0.486215	5.0124	1.96751	0.0682654	0.582068	-4.17807
CHD7	0.30871	4.32913	1.96638	0.0684067	0.582449	-4.17975
TAS2R19	0.350754	2.37277	1.96622	0.0684273	0.582449	-4.18
BLOC1S1	0.497683	6.88017	1.96582	0.0684768	0.582597	-4.18059
SLC35F5	0.422921	3.14009	1.96501	0.0685782	0.583096	-4.18179
SUN5	0.362705	2.96995	1.96387	0.0687224	0.5834	-4.18351
ASPH	0.394239	10.0014	1.96375	0.0687367	0.5834	-4.18368
TAS2R9	0.326664	1.80957	1.96352	0.068766	0.5834	-4.18402
DDX41	0.279707	6.6478	1.96337	0.0687849	0.5834	-4.18425
ELK1	0.382664	4.24932	1.96296	0.0688363	0.583655	-4.18486
POLR3G	0.595506	4.40359	1.96278	0.0688597	0.583672	-4.18513
RPL31	0.386591	9.92988	1.96234	0.0689146	0.583722	-4.18578
EFCAB11	0.506713	2.98904	1.96226	0.0689256	0.583722	-4.18591
DPRX	0.395988	2.74453	1.96205	0.0689511	0.583722	-4.18621
CRLF3	0.359427	3.05586	1.96155	0.0690152	0.583849	-4.18697
LEO1	0.395025	5.53974	1.9605	0.0691484	0.583849	-4.18854
ZC3H8	0.544522	4.21746	1.96026	0.0691781	0.583849	-4.18889
DUXAP7	0.298487	2.83777	1.95991	0.0692227	0.583849	-4.18942
RENBP	0.30893	4.17224	1.95961	0.0692601	0.583951	-4.18986
LRTM1	0.301022	2.2717	1.95904	0.0693325	0.584053	-4.19071
SRBD1	0.343	2.58087	1.95863	0.0693854	0.584065	-4.19133
SERBP1P5	0.291933	5.83413	1.95828	0.0694291	0.584065	-4.19184
RPS19P3	0.38192	6.47305	1.95819	0.0694407	0.584065	-4.19198
SLBP	0.300109	4.59728	1.95793	0.0694742	0.584065	-4.19237
SPINT1	0.46341	6.13317	1.95771	0.069502	0.584065	-4.19269
RAC1P2	0.497095	8.02856	1.9576	0.069516	0.584065	-4.19286
MTRNR2L8	0.393478	10.1191	1.95745	0.0695348	0.584065	-4.19308
ORM1	0.310389	2.19308	1.95735	0.0695479	0.584065	-4.19323
TRIQK	0.483542	3.47592	1.95679	0.0696196	0.584308	-4.19407
TDRD12	0.347808	2.07073	1.95637	0.0696725	0.584312	-4.19469
NDUFA6	0.525902	5.80019	1.9562	0.0696939	0.584312	-4.19494
IFT80	0.314898	4.36489	1.95562	0.069768	0.584312	-4.1958
RPS18P9	0.348421	6.49639	1.95537	0.0698001	0.584312	-4.19618
FOXD3	0.318704	3.17961	1.95496	0.0698532	0.584312	-4.1968
GSTO2	0.340992	5.42321	1.95441	0.0699227	0.584312	-4.19761
COX20P1	0.372344	8.9032	1.95388	0.0699915	0.584312	-4.19841
WWP1	0.338667	2.10791	1.9537	0.0700146	0.584312	-4.19868
SIRT3	0.319053	7.16753	1.95353	0.0700353	0.584312	-4.19892
RAD51AP1P1	0.373029	2.98656	1.95345	0.0700462	0.584312	-4.19904
PPP2CB	0.467886	3.67214	1.95321	0.0700765	0.584312	-4.1994
VN1R4	0.318875	2.04052	1.95249	0.0701691	0.584559	-4.20047
EFNA1	0.479735	5.6477	1.951	0.0703608	0.5854	-4.20269
TAX1BP1	0.533341	8.16478	1.95068	0.0704022	0.5854	-4.20317
GET4	0.356608	5.88832	1.95065	0.0704063	0.5854	-4.20322
OTUD3	0.351368	5.55678	1.95058	0.0704144	0.5854	-4.20331
TTPAL	0.387862	3.45361	1.95024	0.0704584	0.585549	-4.20382
RPL5P8	0.303241	5.02848	1.95004	0.0704849	0.585549	-4.20412
HNRNPA1P34	0.329112	4.71611	1.94994	0.0704966	0.585549	-4.20426
RPSAP75	0.378862	3.80215	1.94962	0.070538	0.585557	-4.20474
LDHAP7	0.330692	5.72561	1.9496	0.0705405	0.585557	-4.20477
CYB5RL	0.36157	3.97706	1.94896	0.0706241	0.585746	-4.20573
RBM34	0.385297	6.01284	1.94889	0.070633	0.585746	-4.20583
RPS11P7	0.347416	3.63519	1.94876	0.0706491	0.585746	-4.20602
XPO5	0.436726	4.87655	1.94829	0.0707101	0.585864	-4.20672
CERS6	0.445362	6.40006	1.94778	0.070776	0.585864	-4.20748
SNORD119	0.542857	2.64707	1.94719	0.0708531	0.585864	-4.20836
RPL24P4	0.308225	4.73926	1.94681	0.0709015	0.585864	-4.20892
PROX1	0.612563	4.21406	1.94677	0.070907	0.585864	-4.20898
OR52K3P	0.295974	4.65658	1.94676	0.0709079	0.585864	-4.20899
MTATP6P2	0.305435	3.491	1.9466	0.0709286	0.585864	-4.20923
ACOT6	0.361033	2.50762	1.94653	0.0709381	0.585864	-4.20934
ALDOAP2	0.361113	4.53197	1.94644	0.0709491	0.585864	-4.20946
ARMC1	0.447513	4.02721	1.94633	0.0709637	0.585864	-4.20963
VLDLR-AS1	0.296698	1.7146	1.94568	0.0710487	0.585922	-4.2106
IP6K2	0.346201	2.84662	1.94564	0.0710534	0.585922	-4.21066
RC3H2	0.333762	4.57574	1.94553	0.0710672	0.585922	-4.21082
TMEM87B	0.332986	4.0992	1.94524	0.0711053	0.585922	-4.21125
RAP1GAP2	0.540311	4.46632	1.94452	0.0711988	0.585922	-4.21232
RPL35AP	0.358328	3.93985	1.94438	0.0712169	0.585922	-4.21253
TMEM86B	0.314319	3.48636	1.94418	0.0712432	0.585922	-4.21283
ELP2	0.351595	2.33623	1.94386	0.0712843	0.585922	-4.2133
RPSAP17	0.341015	3.55938	1.94371	0.0713042	0.585922	-4.21352
RPL37P15	0.445719	5.42588	1.9435	0.0713318	0.585922	-4.21384
CCDC59	0.426806	5.28908	1.94324	0.0713662	0.585922	-4.21423
SCARNA20	0.401541	4.64324	1.94255	0.071456	0.585922	-4.21525
CYCSP4	0.345764	2.91425	1.94227	0.0714918	0.585922	-4.21566
RRH	0.394588	2.95974	1.94201	0.0715266	0.585922	-4.21606
ENOPH1	0.326229	6.39615	1.94188	0.0715428	0.585922	-4.21624
EXPH5	0.491376	5.07948	1.94139	0.0716073	0.585922	-4.21697
JPX	0.42677	3.97756	1.94134	0.071614	0.585922	-4.21705
TET1P1	0.307988	2.50295	1.94133	0.0716146	0.585922	-4.21705
ZNF567	0.613624	3.24642	1.94098	0.0716609	0.586125	-4.21758
MINPP1	0.336786	2.92959	1.94062	0.0717077	0.586333	-4.21811
ZBTB20-AS4	0.330788	2.18461	1.94041	0.0717356	0.586385	-4.21843
CAAP1	0.279296	5.55404	1.94018	0.071765	0.586446	-4.21876
IL23R	0.383355	2.97681	1.94002	0.0717861	0.586446	-4.219
RAB43	0.391168	4.12562	1.93891	0.0719321	0.586695	-4.22065
LPAR5	0.383599	4.49129	1.93839	0.0720004	0.586695	-4.22142
INS	0.321677	3.12932	1.93815	0.0720315	0.586695	-4.22177
CAST	0.336007	6.71966	1.93712	0.0721667	0.587219	-4.2233
TIMM10B	0.286474	3.95843	1.93687	0.0721996	0.587219	-4.22367
ZNF780B	0.405444	4.4994	1.93668	0.0722253	0.587219	-4.22395
REPS2	0.352046	3.67749	1.93577	0.0723449	0.587219	-4.2253
EEF1A1P34	0.377241	3.654	1.93459	0.0725017	0.587219	-4.22706
GCDH	0.326248	3.44957	1.93455	0.0725069	0.587219	-4.22712
RPL13P	0.298011	5.96751	1.93437	0.0725301	0.587219	-4.22738
SAC3D1	0.366082	5.17774	1.93376	0.0726103	0.587219	-4.22827
TANK	0.351182	2.99789	1.93364	0.0726271	0.587219	-4.22846
PTP4A2P1	0.296123	6.99495	1.93322	0.0726829	0.587219	-4.22908
MRPS21P6	0.337045	4.28086	1.93315	0.0726918	0.587219	-4.22918
ZIC5	0.373769	3.45521	1.93309	0.0726997	0.587219	-4.22927
COL9A3	0.363797	4.62767	1.93309	0.0726999	0.587219	-4.22927
TMEM14C	0.412295	4.96538	1.93292	0.0727219	0.587219	-4.22952
TMBIM6	0.382267	8.17204	1.93278	0.0727411	0.587219	-4.22973
CCT6A	0.39687	6.39684	1.93252	0.0727759	0.587219	-4.23012
CYCSP17	0.314319	3.2796	1.93243	0.0727869	0.587219	-4.23025
USP28	0.319946	2.15124	1.93229	0.0728051	0.587219	-4.23045
MED19	0.341017	5.11014	1.93124	0.072945	0.587219	-4.23201
MAGEB3	0.30058	3.8958	1.93103	0.0729726	0.587219	-4.23231
[truncated: 25,303 more rows]

## Sheet: SE vs MU
Gene	logFC	AveExpr	t	P.Value	adj.P.Val	B
STK25P1	0.564775	3.79785	4.17171	0.000690808	0.608401	-1.24203
STPG1	0.627168	4.97773	4.08448	0.000831012	0.638124	-1.34478
ASB11	0.620089	3.15527	3.97447	0.00104967	0.638124	-1.47581
AMACR	0.526645	3.57294	3.97404	0.00105064	0.638124	-1.47633
PIGR	1.25565	8.62587	3.92723	0.00116059	0.649814	-1.53255
CXXC4	0.51009	2.83316	3.91362	0.00119471	0.649814	-1.54896
VWA5B1	0.638841	3.74825	3.88403	0.00127235	0.668035	-1.58468
RPS6KA1	0.629089	5.17743	3.77162	0.00161663	0.731749	-1.72133
OR13J1	0.582333	2.81938	3.72884	0.001771	0.731749	-1.77369
CABP4	0.497993	4.43121	3.71574	0.00182119	0.731749	-1.78977
CC2D1B	0.561639	3.30782	3.71569	0.00182137	0.731749	-1.78983
LL22NC01-81G9.3	0.530503	3.09248	3.68613	0.00193989	0.731749	-1.82617
CTNNA3	0.529464	2.68665	3.66689	0.00202112	0.731749	-1.84985
RAPGEF5	0.625811	4.51955	3.64143	0.00213392	0.731749	-1.88127
RRM2	0.541282	4.45983	3.63058	0.00218385	0.731749	-1.89466
ZNF556	0.46043	1.92024	3.55323	0.00257553	0.731749	-1.99053
PARM1	0.667621	3.62478	3.51094	0.0028185	0.731749	-2.04314
RPS3AP39	0.497442	4.23023	3.51076	0.00281963	0.731749	-2.04337
MRI1	0.45329	4.29242	3.49521	0.00291462	0.731749	-2.06275
RWDD2B	0.588231	2.84802	3.48872	0.0029552	0.731749	-2.07084
SYNGR4	0.49733	3.61486	3.48138	0.00300183	0.731749	-2.08001
TMEM208	0.437507	3.9068	3.4611	0.00313438	0.74413	-2.10533
DUSP5P1	0.52146	3.53878	3.41704	0.00344282	0.750542	-2.16046
ZNF330	0.424602	5.24965	3.33313	0.00411587	0.750542	-2.26576
ANKRD27	0.501396	2.18207	3.33294	0.00411753	0.750542	-2.266
MYOM2	0.606792	3.86955	3.32355	0.0042005	0.750542	-2.2778
CALR3	0.446245	3.4182	3.3086	0.00433614	0.750542	-2.29661
DRD4	0.448488	4.328	3.30638	0.00435668	0.750542	-2.29941
PHBP2	0.588447	3.12665	3.30297	0.00438835	0.750542	-2.3037
ARHGAP11B	0.564559	2.95469	3.29303	0.00448204	0.750542	-2.31622
CIR1P3	0.475092	2.33777	3.29051	0.00450606	0.750542	-2.31939
TMEM220-AS1	0.462316	5.43965	3.28821	0.00452808	0.750542	-2.32228
BTBD6	0.449373	4.92279	3.28092	0.00459879	0.750542	-2.33147
COG4	0.559874	2.75151	3.28002	0.0046076	0.750542	-2.3326
GPT	0.485105	3.94801	3.27846	0.00462289	0.750542	-2.33457
GPR89A	0.588869	2.7649	3.27009	0.00470576	0.750542	-2.34511
IST1	0.555989	5.2706	3.26524	0.00475446	0.750542	-2.35122
DNAJC27	0.502471	3.92838	3.25084	0.00490205	0.750542	-2.36938
TEX29	0.439147	3.40204	3.2452	0.00496109	0.750542	-2.3765
C5orf52	0.444895	2.90492	3.24219	0.00499286	0.750542	-2.38029
IGDCC3	0.439876	3.0783	3.23603	0.00505846	0.750542	-2.38805
TIMD4	0.527107	2.04835	3.23246	0.00509695	0.750542	-2.39256
ZBTB8B	0.503973	2.87352	3.22583	0.00516908	0.753851	-2.40092
TAPT1-AS1	0.522559	4.64781	3.22249	0.00520582	0.753851	-2.40514
FAM71C	0.413139	1.99584	3.21537	0.005285	0.753851	-2.41412
SOX6	0.531273	3.44613	3.20542	0.00539766	0.753851	-2.42669
FAM83A	0.472682	4.07253	3.19465	0.00552231	0.753851	-2.44029
DSG2	0.479236	4.85464	3.1878	0.00560297	0.753984	-2.44894
SNORD2	0.46728	2.24455	3.17669	0.00573639	0.754157	-2.46297
COL5A1-AS1	0.444244	3.08853	3.17423	0.00576634	0.754157	-2.46608
ZNHIT2	0.496559	4.03972	3.16472	0.00588365	0.754157	-2.4781
KLRB1	0.545509	3.088	3.1471	0.00610717	0.76002	-2.50037
TCEA3	0.481638	6.91163	3.14177	0.00617636	0.76002	-2.50711
CAMKV	0.494059	3.44626	3.13051	0.00632514	0.763494	-2.52134
GRIK1-AS2	0.43702	2.8136	3.1288	0.006348	0.763494	-2.5235
RANBP3L	0.422148	2.01942	3.08439	0.00697227	0.794939	-2.57967
MARK3P1	0.469231	2.98171	3.0818	0.00701054	0.794939	-2.58295
DGUOK	0.547279	3.17269	3.07091	0.00717334	0.801274	-2.59672
PRPF19	0.490399	3.04684	3.06787	0.00721958	0.801274	-2.60057
THG1L	0.413292	3.35532	3.03754	0.00769603	0.808143	-2.63894
CERS6-AS1	0.475957	3.44961	3.03062	0.0078089	0.813735	-2.64769
AKR1C4	0.406664	2.91671	3.02728	0.00786407	0.816368	-2.65192
SKAP1	0.400658	5.19013	3.00072	0.00831581	0.834325	-2.68552
CHST9	0.418662	2.12722	2.97591	0.00876072	0.834325	-2.7169
PRELID3BP4	0.415258	2.91105	2.9598	0.00906212	0.834325	-2.73728
PI3	0.529277	5.7759	2.95915	0.00907436	0.834325	-2.7381
NUP214	0.446662	5.9297	2.95742	0.00910745	0.834325	-2.74029
NME7	0.537309	3.45334	2.95161	0.00921899	0.834325	-2.74763
CNGB3	0.433451	3.17035	2.951	0.0092309	0.834325	-2.74841
DYNLT3P2	0.480244	4.02109	2.94443	0.00935878	0.834325	-2.75671
UBL4B	0.472775	4.40955	2.92591	0.00972902	0.834687	-2.78012
AKIRIN2	0.408572	2.42727	2.91718	0.00990853	0.834687	-2.79116
ELF3	0.466925	4.60911	2.90771	0.0101068	0.834687	-2.80312
FCAR	0.430753	2.6816	2.90721	0.0101173	0.834687	-2.80375
OR4C50P	0.396877	2.15535	2.90562	0.010151	0.834687	-2.80576
E2F1	0.549315	3.06803	2.9056	0.0101516	0.834687	-2.80579
FAM3B	0.442341	2.79624	2.90541	0.0101554	0.834687	-2.80602
MTCO3P23	0.753982	3.86764	2.90304	0.0102061	0.834687	-2.80903
DEFB104A	0.473742	2.83284	2.89862	0.0103007	0.834687	-2.81461
MEP1A	0.589084	3.48449	2.89462	0.0103872	0.834687	-2.81966
NUFIP2	0.522388	5.24237	2.89259	0.0104314	0.834687	-2.82222
RADIL	0.394383	2.93725	2.88761	0.0105406	0.834687	-2.82852
CCDC34P1	0.383488	1.70019	2.88426	0.0106145	0.834687	-2.83274
TRMT10C	0.518838	2.70729	2.88316	0.0106389	0.834687	-2.83413
STAG3	0.395286	3.85049	2.88068	0.0106943	0.834687	-2.83727
USP17L6P	0.477409	2.49366	2.88031	0.0107025	0.834687	-2.83774
AP3M1	0.420113	5.40079	2.87912	0.0107292	0.834687	-2.83924
IDI1	0.610527	3.71151	2.87727	0.0107705	0.834687	-2.84157
STS	0.479492	3.97979	2.87612	0.0107965	0.834687	-2.84302
SNORD124	0.499584	4.34507	2.87496	0.0108226	0.834687	-2.84449
NF2	0.476512	2.96415	2.85189	0.0113563	0.849495	-2.87361
SPTAN1	0.477586	3.71779	2.85137	0.0113685	0.849495	-2.87426
CBLC	0.440486	4.6738	2.84798	0.0114492	0.849495	-2.87854
MTND6P1	0.429079	2.40267	2.84558	0.0115066	0.849495	-2.88157
CASP5	0.543576	3.95454	2.84081	0.0116216	0.849495	-2.88759
CENPBD1	0.391914	3.44391	2.8359	0.011741	0.849495	-2.89378
IL9	0.474062	3.71823	2.83416	0.0117836	0.849495	-2.89597
C12orf50	0.528429	2.91937	2.83354	0.0117988	0.849495	-2.89675
CHRNA9	0.39251	2.85816	2.83272	0.0118191	0.849495	-2.89779
SNORA22	0.906807	3.32613	2.81952	0.0121482	0.856216	-2.91443
BROX	0.582227	2.99074	2.81647	0.0122255	0.856216	-2.91828
EXO1	0.57876	2.71217	2.80834	0.0124337	0.856216	-2.92851
SAXO1	0.443726	2.80193	2.80428	0.0125392	0.856216	-2.93363
ARMC1	0.607019	4.1216	2.79652	0.0127428	0.856216	-2.9434
KATNBL1P1	0.459982	2.93201	2.79652	0.012743	0.856216	-2.94341
SLCO1B7	0.450325	1.81114	2.79252	0.0128493	0.856216	-2.94844
FLJ16779	0.404369	3.02846	2.79159	0.012874	0.856216	-2.94961
TYR	0.41462	2.30346	2.78991	0.012919	0.856216	-2.95173
WDR64	0.436593	1.8226	2.78707	0.0129955	0.857011	-2.9553
PLCB3	0.442514	4.7807	2.78213	0.0131292	0.861954	-2.96152
NPAP1P3	0.498184	2.64094	2.78015	0.0131832	0.861954	-2.96401
HMMR	0.368047	2.59079	2.76513	0.0136003	0.875376	-2.98291
C3orf84	0.436516	2.78723	2.76306	0.0136587	0.875376	-2.98551
PPAN-P2RY11	0.412077	5.7735	2.75018	0.014028	0.877838	-3.0017
RIMS1	0.487204	3.46673	2.74836	0.0140811	0.877838	-3.004
TFAP4	0.408239	6.21082	2.74042	0.0143142	0.877838	-3.01396
ZNF734P	0.425893	2.96023	2.74039	0.014315	0.877838	-3.014
FKSG29	0.529992	4.74799	2.73247	0.0145516	0.877838	-3.02395
SRMP2	0.365929	2.7246	2.7278	0.0146925	0.877838	-3.02981
MPRIP-AS1	0.505508	3.90035	2.72053	0.0149149	0.877838	-3.03893
CXCL14	0.470509	4.65778	2.72006	0.0149294	0.877838	-3.03953
MAPK15	0.449127	3.08603	2.71932	0.0149522	0.877838	-3.04045
CHKB	0.390079	5.15529	2.71307	0.0151464	0.877838	-3.0483
LHFPL3-AS2	0.606286	3.01468	2.70995	0.0152442	0.877838	-3.05221
RAB43	0.553303	4.1117	2.70789	0.0153093	0.877838	-3.0548
YPEL5P3	0.367288	3.2557	2.70321	0.0154577	0.877838	-3.06066
EIF3KP2	0.39573	2.33481	2.69987	0.0155646	0.877838	-3.06485
MOGAT2	0.482702	3.11718	2.69756	0.015639	0.877838	-3.06775
SERGEF	0.396053	5.11596	2.69515	0.0157166	0.877838	-3.07076
CALCB	0.441024	4.01596	2.69504	0.0157203	0.877838	-3.0709
EFNA2	0.413269	3.17084	2.69305	0.0157849	0.877838	-3.07339
BBX	0.408101	2.49018	2.69155	0.0158337	0.877838	-3.07527
HSD11B2	0.467683	4.13459	2.6914	0.0158385	0.877838	-3.07545
PPP1R2P2	0.423502	4.18115	2.69056	0.0158661	0.877838	-3.07652
BOP1	0.36965	6.33871	2.68727	0.0159738	0.877838	-3.08063
LRRC63	0.353964	1.83093	2.68718	0.0159771	0.877838	-3.08075
TMED1	0.430348	5.7303	2.6867	0.0159928	0.877838	-3.08135
TMEM222	0.413094	3.45385	2.68627	0.016007	0.877838	-3.08189
TMOD2	0.427158	2.82629	2.68201	0.016148	0.877838	-3.08722
REG3A	0.586363	4.1578	2.68087	0.0161859	0.877838	-3.08865
RPS15AP34	0.533451	2.42791	2.67975	0.0162232	0.877838	-3.09005
C5orf66-AS1	0.379902	4.77978	2.67893	0.0162505	0.877838	-3.09107
IGF2BP3	0.544993	2.75574	2.67742	0.0163011	0.877838	-3.09296
TOMM34	0.419122	3.38595	2.67682	0.0163213	0.877838	-3.09371
C11orf53	0.4159	3.40829	2.67295	0.0164517	0.877838	-3.09856
OR51F2	0.366748	1.74112	2.66817	0.0166143	0.877838	-3.10454
ANKRD26P1	0.383575	2.5	2.66508	0.0167204	0.877838	-3.10841
RBM47	0.424086	5.40456	2.66501	0.0167228	0.877838	-3.1085
PPIAP1	0.33578	5.88477	2.66147	0.0168447	0.877838	-3.11292
MTND1P35	0.476539	2.42603	2.65933	0.0169192	0.877838	-3.1156
MGST1	0.487386	6.84631	2.65868	0.0169416	0.877838	-3.1164
SLC44A4	0.475528	6.52883	2.65405	0.0171034	0.877838	-3.12219
RPS20P31	0.405752	2.12132	2.65314	0.0171357	0.877838	-3.12334
LOH12CR2	0.504824	2.75394	2.65282	0.0171467	0.877838	-3.12373
HSPE1P20	0.47322	2.50451	2.65074	0.0172204	0.877838	-3.12634
SLC47A2	0.340554	3.85951	2.65053	0.0172277	0.877838	-3.1266
ROR1-AS1	0.472789	2.60018	2.65016	0.0172407	0.877838	-3.12705
TRAF3IP1	0.392052	5.23882	2.64719	0.0173463	0.877838	-3.13077
RPL7AP72	0.384801	3.03621	2.64667	0.0173647	0.877838	-3.13142
PRR11	0.562721	5.40958	2.64631	0.0173776	0.877838	-3.13187
TREML2	0.390828	2.81954	2.63799	0.0176769	0.88391	-3.14226
DNAH5	0.39884	2.58409	2.63324	0.0178498	0.88595	-3.14819
ZNF57	0.520574	5.49827	2.63236	0.0178819	0.88595	-3.14928
SP9	0.372704	3.67653	2.62884	0.0180115	0.886037	-3.15368
IFNW1	0.453735	3.47414	2.62615	0.0181112	0.889336	-3.15704
SAMD5	0.440805	2.18998	2.62227	0.0182558	0.893225	-3.16188
GSTM4	0.386636	3.86543	2.61231	0.0186317	0.896727	-3.17429
LIPJ	0.388573	1.89618	2.61122	0.0186733	0.896727	-3.17564
PDP2	0.454751	4.69807	2.61049	0.0187011	0.896727	-3.17655
ING5	0.400138	2.79171	2.60866	0.0187715	0.896727	-3.17884
CARD11	0.337119	5.44219	2.60859	0.0187739	0.896727	-3.17892
RNPEPL1	0.355825	4.27207	2.60773	0.0188069	0.896727	-3.17999
C8B	0.388215	3.12164	2.60525	0.0189027	0.896727	-3.18308
KRT24	0.398849	3.21306	2.60263	0.0190043	0.896727	-3.18635
DDT	0.355426	5.76594	2.60224	0.0190195	0.896727	-3.18683
GPR75-ASB3	0.356884	3.59074	2.60146	0.0190499	0.896727	-3.18781
MTATP6P9	0.33092	1.92432	2.59654	0.0192424	0.899581	-3.19393
KIF6	0.367441	2.25092	2.59052	0.0194804	0.906056	-3.20142
SLC7A2	0.457965	3.24825	2.58807	0.0195783	0.907888	-3.20447
CLYBL	0.376129	3.56858	2.58786	0.0195863	0.907888	-3.20472
FAM41AY1	0.333269	3.35549	2.58162	0.0198375	0.912165	-3.21248
IMP3	0.382349	6.98751	2.58141	0.0198461	0.912165	-3.21274
OR8B7P	0.369355	2.30408	2.57925	0.0199336	0.912165	-3.21542
MYL10	0.335909	2.21205	2.57557	0.0200838	0.912165	-3.22
LATS1	0.362552	4.25153	2.57331	0.0201766	0.912165	-3.22281
FFAR2	0.405313	2.48479	2.56512	0.0205165	0.912165	-3.23299
OR5M9	0.437743	3.5154	2.56368	0.0205765	0.912165	-3.23477
P2RY4	0.326489	5.44013	2.56272	0.0206167	0.912165	-3.23596
MAGEB3	0.355965	3.83625	2.55913	0.0207683	0.912165	-3.24042
SBF1	0.376949	5.20518	2.55646	0.0208814	0.91363	-3.24373
ART4	0.374698	2.73097	2.55204	0.0210699	0.916025	-3.2492
KIF20B	0.405925	3.88413	2.55112	0.0211096	0.916025	-3.25035
MYRFL	0.410461	2.92567	2.55066	0.0211291	0.916025	-3.25091
FOXRED2	0.39251	2.95434	2.5472	0.0212786	0.920677	-3.25521
MLPH	0.496902	6.69349	2.54086	0.0215548	0.924347	-3.26307
C2CD4A	0.430992	4.26296	2.53867	0.0216506	0.924347	-3.26577
KRT17P2	0.327083	4.4074	2.53712	0.021719	0.924347	-3.2677
LNX1	0.653571	3.53468	2.5324	0.0219283	0.924347	-3.27354
RAB11A	0.362145	5.71139	2.53159	0.0219643	0.924347	-3.27454
ERVV-2	0.493616	2.29617	2.52635	0.0221994	0.924347	-3.28103
ANLN	0.407196	5.29829	2.52601	0.0222146	0.924347	-3.28145
FAR2P2	0.427207	2.74511	2.52302	0.0223499	0.924347	-3.28515
PIEZO1P2	0.397681	4.08159	2.52258	0.0223698	0.924347	-3.28569
OLFM4	0.928113	7.65378	2.52041	0.0224682	0.924347	-3.28837
GLYCTK-AS1	0.393727	2.94884	2.51863	0.0225495	0.924347	-3.29057
SLC10A7	0.485062	4.98533	2.5162	0.022661	0.924347	-3.29358
PCDH8	0.361108	2.08681	2.51564	0.0226868	0.924347	-3.29427
PIGA	0.454444	4.10599	2.51552	0.0226925	0.924347	-3.29442
HMGCS2	0.611341	5.50228	2.51476	0.0227272	0.924347	-3.29535
CYP4Z2P	0.37516	2.28809	2.51247	0.0228332	0.924912	-3.29819
THAP10	0.385378	3.06782	2.50825	0.0230291	0.925572	-3.3034
L1TD1	0.53219	2.5804	2.50283	0.0232834	0.926651	-3.31009
KLHL23	0.502358	4.32199	2.50187	0.0233287	0.926683	-3.31128
PGK2	0.364686	2.63944	2.49574	0.0236199	0.928121	-3.31884
FLJ42351	0.392703	2.22331	2.49477	0.023666	0.928121	-3.32003
HS6ST3	0.378774	3.50724	2.49399	0.0237035	0.928121	-3.321
PCSK2	0.365028	2.25594	2.49361	0.0237217	0.928121	-3.32146
GTF2H5	0.374185	2.63692	2.49249	0.0237755	0.928121	-3.32285
EDDM3DP	0.389063	2.34073	2.48941	0.0239243	0.928121	-3.32665
ATP13A2	0.6556	3.65687	2.48567	0.0241058	0.928121	-3.33125
WDR76	0.409072	4.19373	2.48528	0.0241248	0.928121	-3.33173
BTNL2	0.356337	4.03128	2.485	0.0241383	0.928121	-3.33208
HCG4P11	0.391982	3.60745	2.48451	0.024162	0.928121	-3.33268
OR2T33	0.357553	2.16696	2.47992	0.0243873	0.928721	-3.33833
TEKT4	0.368264	4.61297	2.47768	0.0244977	0.928721	-3.34109
BTBD8	0.375953	3.58412	2.47621	0.0245709	0.928721	-3.34291
ITPKB	0.359068	3.20119	2.47486	0.0246379	0.928721	-3.34457
FHAD1	0.528824	3.34879	2.47337	0.0247122	0.928721	-3.3464
RBL2	0.446424	3.38706	2.47257	0.0247519	0.928721	-3.34738
EVX1	0.399764	2.71149	2.471	0.0248303	0.928721	-3.34931
MTCO2P22	0.348898	4.17397	2.46464	0.025151	0.928721	-3.35713
GABPA	0.31404	3.99641	2.4643	0.0251683	0.928721	-3.35755
YIF1B	0.358025	5.39926	2.46391	0.0251882	0.928721	-3.35804
MTND4LP2	0.39855	2.43924	2.46075	0.0253493	0.929367	-3.36192
DUXAP5	0.342126	2.25876	2.46054	0.02536	0.929367	-3.36218
NSMCE4A	0.389816	3.69067	2.45976	0.0253999	0.929582	-3.36314
TCEANC2	0.424637	3.22205	2.45139	0.0258317	0.93588	-3.37342
OR9A3P	0.336582	2.76757	2.44688	0.026067	0.93588	-3.37895
PARP1	0.34629	3.95395	2.44538	0.0261458	0.93588	-3.38079
BNC1	0.414056	2.44341	2.44495	0.0261685	0.93588	-3.38131
CCAR2	0.333373	5.3963	2.4443	0.0262029	0.93588	-3.38212
TEX11	0.385601	1.851	2.44388	0.0262247	0.93588	-3.38262
ROPN1	0.331338	5.07364	2.44348	0.0262462	0.93588	-3.38312
PAQR3	0.397811	4.94428	2.44034	0.0264125	0.93588	-3.38698
PLSCR5-AS1	0.337556	1.66633	2.44027	0.0264159	0.93588	-3.38705
GDPD3	0.328522	5.50203	2.4382	0.026526	0.93588	-3.38959
DUX4L52	0.335469	2.7771	2.43718	0.0265804	0.93588	-3.39084
WDR81	0.411401	4.4537	2.43609	0.026639	0.93588	-3.39218
SEC14L3	0.394039	3.64743	2.43482	0.0267069	0.93588	-3.39373
GALNT3	0.399095	2.10315	2.43437	0.0267315	0.93588	-3.39429
SLC45A1	0.349269	3.9854	2.43436	0.0267318	0.93588	-3.3943
PLA2G4A	0.42358	3.5785	2.43425	0.0267375	0.93588	-3.39443
RPS3AP26	0.330695	5.0577	2.43197	0.0268606	0.938154	-3.39723
RPL13AP6	0.319912	8.60415	2.42694	0.0271332	0.942866	-3.40339
NCALD	0.376967	4.3786	2.42645	0.0271597	0.942866	-3.40398
TSPY23P	0.401507	3.02663	2.42566	0.0272028	0.942866	-3.40495
LNP1	0.310386	2.22226	2.42276	0.027362	0.945931	-3.40851
BCO2	0.349278	2.1574	2.42259	0.0273711	0.945931	-3.40871
TDRD15	0.401103	2.26372	2.42105	0.0274557	0.947052	-3.41059
CKM	0.335747	3.54461	2.42069	0.0274759	0.947052	-3.41104
SOD1	0.335161	6.95648	2.4138	0.0278579	0.95516	-3.41946
NUDT19	0.381279	3.10628	2.41148	0.027988	0.95516	-3.4223
PAPPA-AS2	0.356818	3.31849	2.40506	0.0283501	0.960249	-3.43014
CCDC175	0.489643	2.15116	2.40248	0.0284972	0.960249	-3.43329
BRD7P1	0.394276	2.92769	2.40146	0.0285554	0.960249	-3.43454
PIP5K1A	0.418018	3.80783	2.3981	0.0287478	0.96277	-3.43863
SNX31	0.349706	2.28132	2.39668	0.0288299	0.96277	-3.44037
USP17L13	0.404612	2.88613	2.39445	0.0289586	0.96277	-3.44309
ARMS2	0.326443	3.80289	2.39243	0.0290756	0.96277	-3.44554
RPL7P44	0.323995	5.04971	2.39123	0.0291459	0.96277	-3.44702
SAAL1	0.378398	4.9613	2.39084	0.0291686	0.96277	-3.44749
PLAGL2	0.361367	4.64785	2.3905	0.029188	0.96277	-3.4479
OCM	0.390926	3.86218	2.38556	0.0294781	0.96277	-3.45393
MRRF	0.476963	4.08263	2.38475	0.0295255	0.96277	-3.4549
GFRA4	0.462323	3.4133	2.38354	0.029597	0.96277	-3.45638
E2F5	0.348194	4.35847	2.3817	0.0297062	0.96277	-3.45862
ZFHX2	0.33815	4.06387	2.38022	0.0297943	0.96277	-3.46043
RERE	0.401252	5.25233	2.37986	0.0298153	0.96277	-3.46086
DNM1P46	0.32182	4.4041	2.37958	0.0298322	0.96277	-3.46121
PAX6	0.313536	4.02465	2.3789	0.0298726	0.96277	-3.46203
SLC25A4	0.422115	3.86945	2.37877	0.0298803	0.96277	-3.46219
HMGN1	0.294411	7.05982	2.37812	0.0299189	0.96277	-3.46297
PRKAG2-AS1	0.390373	3.2099	2.37734	0.0299656	0.96277	-3.46393
LYL1	0.350297	5.21489	2.37324	0.0302119	0.96277	-3.46891
PPIAP22	0.326752	4.94111	2.37087	0.030355	0.96277	-3.47179
CHST13	0.41468	3.19395	2.37063	0.0303699	0.96277	-3.47209
ROMO1	0.362887	8.32646	2.3703	0.0303894	0.96277	-3.47249
MTND4LP7	0.364686	2.26582	2.36717	0.0305797	0.96277	-3.47629
OR5D18	0.449514	1.95194	2.36692	0.0305954	0.96277	-3.4766
KIF26A	0.408173	4.27331	2.36567	0.0306718	0.96277	-3.47812
ATP11A	0.35854	3.41522	2.36545	0.0306847	0.96277	-3.47838
SNRPGP7	0.342627	3.47511	2.36369	0.0307925	0.96277	-3.48052
MT-TA	0.309751	9.24305	2.36275	0.0308505	0.96277	-3.48166
CAPN15	0.345791	5.33682	2.3623	0.0308781	0.96277	-3.48221
IGF2BP2-AS1	0.51302	4.66248	2.35839	0.0311196	0.96277	-3.48696
GABRB3	0.421332	3.63387	2.3543	0.031374	0.96277	-3.49192
RPSAP12	0.34914	5.6447	2.35371	0.0314109	0.96277	-3.49264
ZBED4	0.355911	4.51876	2.34898	0.0317077	0.96277	-3.49837
OR5K3	0.308462	2.43997	2.34839	0.0317454	0.96277	-3.49909
PDSS1	0.407456	5.63447	2.34566	0.0319177	0.96277	-3.50239
PDE4B	0.424602	3.82277	2.34418	0.0320121	0.96277	-3.50419
CISH	0.298729	3.99962	2.34362	0.0320478	0.96277	-3.50487
RUNDC3A	0.435578	3.74763	2.34353	0.0320532	0.96277	-3.50497
TBC1D3B	0.348431	5.17993	2.34228	0.0321333	0.96277	-3.50649
CLEC9A	0.346897	2.84505	2.34198	0.0321522	0.96277	-3.50685
TXNDC9	0.324831	3.42448	2.34018	0.0322675	0.96277	-3.50903
SLF1	0.328334	2.1545	2.33978	0.0322933	0.96277	-3.50952
CHRNE	0.375744	2.17578	2.33834	0.0323857	0.96277	-3.51126
DARS2	0.408991	3.7595	2.33632	0.0325156	0.96277	-3.5137
RPL7P61	0.353152	3.79054	2.33503	0.0325995	0.96277	-3.51527
UGT1A1	0.342782	4.5341	2.33458	0.0326283	0.96277	-3.51581
LSM8	0.490183	3.5681	2.33432	0.0326451	0.96277	-3.51612
HMGB1P16	0.362716	2.81719	2.3335	0.0326986	0.96277	-3.51712
PRDX2	0.35414	4.96359	2.33303	0.0327293	0.96277	-3.51769
PMPCA	0.408369	2.05517	2.33236	0.0327726	0.96277	-3.5185
ANKUB1	0.361796	2.73351	2.3302	0.0329131	0.96277	-3.52111
RPS6KA2-AS1	0.335376	4.1097	2.33016	0.0329161	0.96277	-3.52116
CRYGB	0.342902	2.3433	2.32743	0.0330946	0.96277	-3.52446
PI4KB	0.38084	2.82848	2.32676	0.0331387	0.96277	-3.52527
ANKRD49	0.345896	5.7223	2.32673	0.0331406	0.96277	-3.5253
UBR5	0.560716	3.04776	2.32625	0.0331725	0.96277	-3.52589
FAM155A-IT1	0.348168	2.66828	2.32454	0.0332851	0.96277	-3.52795
OR4F17	0.32516	2.15053	2.32336	0.0333632	0.96277	-3.52938
KRT8P38	0.349054	4.41941	2.32262	0.0334119	0.96277	-3.53027
RCAN3	0.302921	3.81081	2.32171	0.0334721	0.96277	-3.53137
TRMT10A	0.405453	3.59246	2.32018	0.0335738	0.96277	-3.53322
ENHO	0.385976	3.7805	2.31921	0.0336388	0.96277	-3.53439
ZBTB44	0.343206	3.67356	2.3182	0.033706	0.96277	-3.53561
DEFA6	0.603738	3.22075	2.31734	0.0337633	0.96277	-3.53664
SPIDR	0.333332	4.59117	2.31595	0.0338562	0.96277	-3.53832
OR51H1	0.309951	2.91438	2.31537	0.0338953	0.96277	-3.53902
SLC25A25	0.376356	3.81778	2.3134	0.0340279	0.96277	-3.5414
FAM170B	0.356325	4.56869	2.31228	0.0341035	0.96277	-3.54275
UBTFL3	0.347904	1.8808	2.31135	0.0341664	0.96277	-3.54387
MKI67	0.463702	5.80523	2.31056	0.0342196	0.96277	-3.54482
RPSAP11	0.344536	3.27615	2.3091	0.034319	0.96277	-3.54659
CTNNA2	0.457359	3.48231	2.30771	0.0344136	0.96277	-3.54827
CRYGEP	0.309535	5.60753	2.30684	0.0344724	0.96277	-3.54931
GEMIN6	0.416534	5.68012	2.30675	0.0344787	0.96277	-3.54942
CCL20	0.616058	4.34447	2.30644	0.0344997	0.96277	-3.54979
USP17L11	0.398413	2.74974	2.30633	0.0345072	0.96277	-3.54992
NLE1	0.32295	4.84587	2.30303	0.034733	0.96277	-3.55389
KREMEN2	0.338957	3.76664	2.30295	0.034739	0.96277	-3.554
RBM46	0.314292	2.72056	2.3015	0.0348388	0.96277	-3.55575
RPL31P9	0.33873	3.34034	2.30136	0.0348484	0.96277	-3.55591
CACNA1D	0.339799	4.55336	2.30039	0.0349152	0.96277	-3.55708
CBX6	0.292295	3.50567	2.30032	0.0349201	0.96277	-3.55717
MRPL37	0.311621	5.18074	2.29976	0.0349586	0.96277	-3.55784
RANBP10	0.318207	6.0964	2.29924	0.0349943	0.96277	-3.55846
NUDC	0.331089	5.12446	2.29683	0.0351616	0.96277	-3.56136
PDGFD	0.298409	3.85808	2.29681	0.0351629	0.96277	-3.56139
MYPOP	0.346404	4.38154	2.29501	0.0352884	0.96277	-3.56356
SNORA78	0.329791	4.19124	2.29447	0.035326	0.96277	-3.5642
RBM22P12	0.489005	2.94906	2.29286	0.0354385	0.96277	-3.56614
RAB37	0.416572	2.90584	2.29253	0.0354615	0.96277	-3.56654
IGSF10	0.333193	1.94515	2.29152	0.0355324	0.96277	-3.56775
CDY15P	0.331198	1.90401	2.29131	0.0355466	0.96277	-3.568
CHMP1B2P	0.421397	2.37308	2.29062	0.0355954	0.96277	-3.56883
TATDN2	0.322081	3.01243	2.29041	0.0356101	0.96277	-3.56908
PPM1K	0.304392	4.00384	2.28986	0.0356491	0.96277	-3.56975
TRIM36	0.385102	2.50714	2.2896	0.0356674	0.96277	-3.57006
IKBKB	0.290311	2.55497	2.28927	0.0356906	0.96277	-3.57046
PKP2	0.378162	5.8502	2.28782	0.0357927	0.96277	-3.5722
TONSL	0.326001	3.10212	2.28319	0.0361211	0.964503	-3.57776
CHAD	0.341236	2.96981	2.28309	0.0361279	0.964503	-3.57787
PSRC1	0.368247	3.63284	2.28271	0.0361557	0.964503	-3.57834
SCTR	0.393068	2.78992	2.2816	0.0362348	0.964503	-3.57967
CYP4F11	0.369143	2.76138	2.27858	0.0364511	0.964503	-3.5833
RAD21	0.35759	3.88792	2.27637	0.0366103	0.964503	-3.58595
ASZ1	0.350909	2.22954	2.27634	0.0366124	0.964503	-3.58598
PTAR1	0.353692	2.84488	2.27602	0.0366355	0.964503	-3.58637
PLRG1	0.392487	4.86913	2.27427	0.0367614	0.964503	-3.58846
RAD21-AS1	0.342825	2.90245	2.2726	0.0368828	0.964503	-3.59046
SOHLH1	0.368104	5.02798	2.26886	0.0371555	0.964503	-3.59495
FAM160A1	0.375472	2.24601	2.26885	0.0371564	0.964503	-3.59496
HSBP1L1	0.435716	3.83508	2.26853	0.0371794	0.964503	-3.59534
KIAA1549L	0.319667	4.63626	2.26826	0.0371996	0.964503	-3.59567
FBXO17	0.392475	3.67937	2.26758	0.037249	0.964503	-3.59648
LDHAL6B	0.427475	2.22837	2.2669	0.0372988	0.964503	-3.59729
PPIF	0.515722	3.8014	2.26671	0.0373131	0.964503	-3.59752
OR4A17P	0.29978	4.06947	2.26553	0.0373999	0.964503	-3.59894
FAM169A	0.321345	3.33053	2.26542	0.0374081	0.964503	-3.59907
CRLF2	0.366299	4.94945	2.26491	0.0374456	0.964503	-3.59968
PTCD2P2	0.350144	2.74199	2.26485	0.0374501	0.964503	-3.59975
CT47A7	0.31231	3.70045	2.26473	0.0374588	0.964503	-3.5999
OTC	0.422578	2.19035	2.26444	0.03748	0.964503	-3.60024
TBXA2R	0.388012	4.78159	2.26322	0.0375699	0.965851	-3.6017
ADGRA3	0.306096	1.713	2.26194	0.0376649	0.967383	-3.60324
NT5C1A	0.333897	3.00861	2.26093	0.0377395	0.968386	-3.60444
COA3	0.40578	4.15368	2.25765	0.0379839	0.971471	-3.60837
ADPGK	0.319844	4.68817	2.2566	0.0380623	0.971471	-3.60962
UTP20	0.365319	3.22636	2.25606	0.038103	0.971471	-3.61027
DPY19L3	0.45584	3.34239	2.25342	0.0383003	0.971471	-3.61342
HMGN2P32	0.3576	4.40166	2.25309	0.0383257	0.971471	-3.61382
OR4D9	0.331151	2.27108	2.25219	0.0383931	0.971471	-3.61489
GABBR2	0.322723	4.26779	2.25112	0.0384738	0.972605	-3.61617
ETHE1	0.347529	5.06829	2.24766	0.0387365	0.976639	-3.62031
TAAR9	0.448689	2.82757	2.24569	0.038886	0.978639	-3.62265
MAGEA9	0.332171	3.02361	2.24562	0.0388918	0.978639	-3.62274
ZNF791	0.332021	4.65407	2.2436	0.0390463	0.979371	-3.62516
TMPRSS11D	0.327905	1.90079	2.24245	0.0391341	0.97963	-3.62652
NUTM2B-AS1	0.478545	3.28268	2.24148	0.0392086	0.980167	-3.62768
EDIL3	0.299661	3.94277	2.24108	0.0392397	0.980167	-3.62816
CLDN23	0.419952	4.41648	2.23843	0.0394438	0.983465	-3.63132
NDUFA3	0.298284	6.96603	2.23643	0.0395988	0.98643	-3.6337
CBR3	0.449225	2.85943	2.23465	0.039737	0.987169	-3.63582
SMIM10L2B	0.317589	5.45267	2.23181	0.0399585	0.987169	-3.6392
SLC2A9	0.329788	4.01177	2.23153	0.0399806	0.987169	-3.63954
CEP57L1P1	0.397312	2.4822	2.23145	0.0399866	0.987169	-3.63963
RPL5P33	0.334191	4.51114	2.23014	0.0400898	0.987169	-3.6412
C1orf87	0.390571	4.46324	2.22844	0.0402234	0.987169	-3.64322
NDUFB4P8	0.351342	3.05148	2.22819	0.0402432	0.987169	-3.64352
SIGLEC28P	0.32759	3.73719	2.22451	0.0405337	0.988913	-3.6479
OR8B8	0.369128	3.10655	2.22312	0.040644	0.989885	-3.64955
SIDT1-AS1	0.32836	1.94827	2.2201	0.0408847	0.993623	-3.65314
ACTN3	0.371435	2.71358	2.21975	0.0409128	0.993623	-3.65356
STARD4	0.328078	5.04105	2.21752	0.0410912	0.993623	-3.6562
SEC62	0.293673	6.81696	2.21711	0.0411247	0.993623	-3.6567
EI24P4	0.332075	2.39504	2.21588	0.0412234	0.993623	-3.65816
FOCAD	0.354962	4.40808	2.21556	0.0412493	0.993623	-3.65854
RPL7AP69	0.360874	3.8128	2.215	0.0412938	0.993623	-3.65919
UGT2B17	0.438712	3.47134	2.21454	0.0413316	0.993623	-3.65975
POU5F1	0.419734	4.2138	2.21319	0.0414407	0.993623	-3.66135
PSMB10	0.333869	3.27926	2.21315	0.0414439	0.993623	-3.6614
RP1	0.35923	3.97957	2.21304	0.0414525	0.993623	-3.66153
GNRHR2P1	0.350339	3.6189	2.21099	0.0416191	0.994664	-3.66396
NDUFB4P3	0.391385	4.71575	2.21067	0.0416451	0.994664	-3.66434
GOLGA4	0.303961	5.38346	2.21017	0.0416854	0.994664	-3.66493
FKBP14	0.370391	5.16103	2.20981	0.0417145	0.994664	-3.66536
SFXN2	0.349772	5.14569	2.20928	0.0417584	0.99484	-3.666
CETN1	0.299085	3.91773	2.20822	0.0418448	0.995431	-3.66725
ACSS2	0.505669	5.58322	2.20734	0.0419164	0.995431	-3.66829
ZNF317	0.298218	5.21336	2.20427	0.0421685	0.995431	-3.67194
TXNRD1	0.298473	6.54562	2.20404	0.042187	0.995431	-3.6722
OR7G1	0.38648	2.59729	2.20345	0.0422355	0.995431	-3.6729
TFEB	0.345488	2.47183	2.20248	0.042316	0.995431	-3.67406
NKPD1	0.389578	3.38341	2.20145	0.0424009	0.995431	-3.67528
HEATR3	0.319422	4.16143	2.20125	0.0424175	0.995431	-3.67551
ZNF74	0.345458	3.99116	2.19916	0.0425903	0.995431	-3.67799
HOXA2	0.408474	3.68011	2.19858	0.0426389	0.995431	-3.67868
LYPLA2P1	0.300317	4.94936	2.19724	0.0427498	0.995431	-3.68026
CNOT8	0.296702	3.06688	2.19447	0.0429811	0.995431	-3.68354
DMRTC1B	0.347593	4.29229	2.19313	0.0430939	0.995431	-3.68513
TUBGCP2	0.417286	4.28162	2.19209	0.0431807	0.995431	-3.68635
ZDHHC11	0.307024	3.10909	2.18544	0.0437436	0.995431	-3.69422
NPHP4	0.292206	4.25815	2.18496	0.043784	0.995431	-3.69478
KDM4D	0.318767	2.19086	2.18295	0.0439556	0.995431	-3.69716
ZNF646	0.320427	4.67993	2.18246	0.0439976	0.995431	-3.69774
NLRP7	0.442567	2.50348	2.18235	0.0440072	0.995431	-3.69787
CACTIN-AS1	0.337543	3.73529	2.18188	0.0440474	0.995431	-3.69843
RPL3P3	0.3543	4.37182	2.181	0.0441228	0.995431	-3.69946
PAICSP4	0.448729	3.54326	2.18035	0.0441781	0.995431	-3.70022
USP17L7	0.374771	2.3368	2.17942	0.0442585	0.995431	-3.70133
TEX13D	0.332512	5.66759	2.17802	0.0443789	0.995431	-3.70298
TFB2M	0.329638	4.01705	2.17749	0.0444245	0.995431	-3.7036
OR4A14P	0.316532	2.79703	2.17704	0.044463	0.995431	-3.70413
VDAC2P2	0.284155	4.56543	2.1757	0.0445793	0.995431	-3.70572
DPH6	0.359568	3.50531	2.17504	0.0446362	0.995431	-3.70649
CXCL8	0.64371	7.86804	2.16811	0.0452406	0.995431	-3.71466
SDHD	0.387328	4.35211	2.16801	0.0452494	0.995431	-3.71478
ING2	0.313853	2.94662	2.16716	0.0453239	0.995431	-3.71577
CAPN11	0.27762	3.84203	2.16708	0.0453313	0.995431	-3.71587
CLLU1	0.281618	1.9766	2.16695	0.0453427	0.995431	-3.71603
RNF44	0.327701	4.76265	2.166	0.0454259	0.995431	-3.71714
RAB19	0.282229	3.7917	2.16597	0.0454286	0.995431	-3.71718
LRRC7	0.32707	1.92938	2.16575	0.0454486	0.995431	-3.71744
SPINT2	0.348414	5.34912	2.16474	0.0455376	0.995431	-3.71863
USP17L24	0.289947	3.80238	2.16323	0.0456712	0.995431	-3.72041
BOLL	0.308689	2.9062	2.16209	0.0457722	0.995431	-3.72175
TOX4P1	0.276346	5.78564	2.16203	0.0457772	0.995431	-3.72182
PRKRA	0.315065	4.71665	2.16144	0.0458297	0.995431	-3.72251
PLCE1	0.398133	2.97436	2.15985	0.0459705	0.995431	-3.72437
TXNDC16	0.275874	2.36092	2.15837	0.0461028	0.995431	-3.72612
BTBD10P1	0.302468	4.42657	2.15729	0.0461993	0.995431	-3.72739
HMGN2P41	0.314426	5.26414	2.15589	0.0463252	0.995431	-3.72904
AKAP17BP	0.299476	2.84891	2.15542	0.0463668	0.995431	-3.72958
COX7A2L	0.332677	5.88349	2.15349	0.0465403	0.995431	-3.73185
PKLR	0.281622	4.10479	2.15194	0.0466802	0.995431	-3.73367
FNBP1P1	0.279784	3.53885	2.15192	0.0466819	0.995431	-3.73369
C9orf40	0.367354	3.38538	2.15188	0.046686	0.995431	-3.73375
OR51B8P	0.399163	2.56598	2.15156	0.0467148	0.995431	-3.73412
FLJ41278	0.293213	1.86677	2.1513	0.0467385	0.995431	-3.73443
OR5B19P	0.338497	2.21802	2.15078	0.046785	0.995431	-3.73503
KRTAP1-1	0.329915	3.61751	2.15074	0.0467891	0.995431	-3.73509
DEFA1	0.297115	3.68091	2.14986	0.0468689	0.995431	-3.73612
DEFA1B	0.297115	3.68091	2.14986	0.0468689	0.995431	-3.73612
BARX2	0.325911	4.21594	2.14906	0.0469414	0.995431	-3.73706
LMTK3	0.399198	4.05398	2.14731	0.0471004	0.995431	-3.73911
EPB41	0.376926	5.25427	2.14647	0.0471765	0.995431	-3.74009
FOXN3-AS2	0.279599	2.52079	2.14626	0.047196	0.995431	-3.74034
USP17L22	0.304718	2.65076	2.14542	0.0472731	0.995431	-3.74133
HSD3B1	0.351828	3.08236	2.14207	0.0475795	0.995431	-3.74525
RPL23AP67	0.378343	3.68161	2.14006	0.047765	0.995431	-3.74761
TDP2	0.389707	4.89075	2.13886	0.047876	0.995431	-3.74902
NPBWR2	0.324981	2.33744	2.13874	0.0478866	0.995431	-3.74915
GDNF	0.265378	4.78675	2.1387	0.0478901	0.995431	-3.7492
FAM53B-AS1	0.321098	2.99061	2.13751	0.0480007	0.995431	-3.7506
SMG7-AS1	0.289158	2.59893	2.13569	0.048169	0.995431	-3.75272
ABCC6	0.286285	5.60609	2.13563	0.0481747	0.995431	-3.75279
RPL30P7	0.354683	4.80082	2.13507	0.0482274	0.995431	-3.75345
RAB9AP1	0.336474	2.53158	2.13464	0.0482668	0.995431	-3.75395
TRAJ7	0.361983	4.29168	2.13446	0.0482837	0.995431	-3.75416
RAX2	0.271598	6.03163	2.13418	0.04831	0.995431	-3.75449
ADAM21	0.387202	2.18129	2.13332	0.0483901	0.995431	-3.7555
RPL23AP48	0.362025	4.6382	2.13092	0.0486151	0.995431	-3.75831
TLX3	0.443426	3.89154	2.13014	0.0486877	0.995431	-3.75922
OR2A25	0.359756	2.64659	2.1293	0.0487666	0.995431	-3.7602
GRIK2	0.271475	2.68448	2.1286	0.048833	0.995431	-3.76102
USP17L18	0.304147	2.88923	2.12791	0.0488974	0.995431	-3.76182
MTND2P14	0.42129	1.98177	2.12779	0.0489092	0.995431	-3.76197
CAPS2	0.371678	1.97995	2.12683	0.0489995	0.995431	-3.76309
RPL26P34	0.323664	3.16481	2.12598	0.0490801	0.995431	-3.76408
FCF1P9	0.286618	1.86223	2.12297	0.0493653	0.995431	-3.76759
APOA1-AS	0.359891	2.41763	2.12238	0.0494217	0.995431	-3.76829
UFSP1	0.290108	4.75378	2.11947	0.0496994	0.995431	-3.77168
METTL6	0.404723	2.04574	2.11806	0.0498339	0.995431	-3.77332
VPS52	0.308356	3.99698	2.11805	0.0498356	0.995431	-3.77334
ARHGEF38	0.316276	6.50489	2.11453	0.0501739	0.995431	-3.77744
RNF31	0.351147	5.27002	2.11396	0.0502286	0.995431	-3.7781
HCG23	0.379714	3.25549	2.11312	0.0503103	0.995431	-3.77909
SNORD29	0.309692	1.66781	2.11263	0.0503572	0.995431	-3.77965
CC2D2B	0.333068	1.98276	2.11258	0.0503628	0.995431	-3.77972
RPL7L1P1	0.326229	2.21951	2.11226	0.0503935	0.995431	-3.78009
LRRTM4	0.274787	2.76844	2.11074	0.050541	0.995431	-3.78186
POLR3D	0.286435	4.74971	2.10952	0.0506591	0.995431	-3.78327
SPDYE22P	0.359203	3.12782	2.10724	0.0508819	0.995431	-3.78593
TIMM8B	0.29754	6.84142	2.10681	0.0509241	0.995431	-3.78644
ZSCAN5B	0.299846	2.99592	2.10671	0.050934	0.995431	-3.78655
SBF1P1	0.394553	3.04307	2.10671	0.050934	0.995431	-3.78655
RPP25	0.270969	5.38266	2.10558	0.0510444	0.995431	-3.78786
OFD1P6Y	0.344465	2.03134	2.10018	0.0515759	0.995431	-3.79414
LEMD2	0.347072	5.04814	2.09983	0.0516106	0.995431	-3.79455
NFYC	0.289074	3.12428	2.09956	0.0516375	0.995431	-3.79486
MCM3AP	0.291136	5.82581	2.09857	0.0517361	0.995431	-3.79602
CYP2F1	0.404437	2.89806	2.09829	0.0517639	0.995431	-3.79634
OR2AT2P	0.307994	3.43684	2.09689	0.0519026	0.995431	-3.79796
IL1RN	0.38371	4.83603	2.09543	0.0520481	0.995431	-3.79966
RAP1GAP	0.440982	4.51329	2.09479	0.0521122	0.995431	-3.8004
RPS27P20	0.342897	2.0417	2.09475	0.0521162	0.995431	-3.80045
SURF6	0.379151	4.14856	2.09193	0.0523984	0.995431	-3.80372
SNORD73B	0.309937	1.63276	2.09186	0.0524059	0.995431	-3.80381
MTCO2P18	0.288922	1.83118	2.09079	0.0525132	0.995431	-3.80505
MAPK4	0.322401	3.27803	2.08898	0.0526955	0.995431	-3.80714
ZFP36	0.399877	4.72777	2.0889	0.052704	0.995431	-3.80724
TMEM165	0.300489	5.95216	2.08884	0.0527103	0.995431	-3.80731
CFAP73	0.300757	4.07253	2.08828	0.0527665	0.995431	-3.80796
ZC3H12A	0.392862	3.99285	2.08531	0.0530672	0.995431	-3.8114
RPL13AP3	0.294234	5.12854	2.08404	0.0531961	0.995431	-3.81287
RPL15P20	0.3502	2.5219	2.08296	0.0533063	0.995431	-3.81412
MRPS36P2	0.442858	2.34637	2.08238	0.0533661	0.995431	-3.8148
ONECUT1	0.308737	3.68354	2.08178	0.0534269	0.995431	-3.81549
CRYGN	0.291314	6.04602	2.08166	0.0534395	0.995431	-3.81563
PABPC3	0.273443	5.25276	2.08107	0.0534998	0.995431	-3.81631
GPR160	0.360443	8.22777	2.08045	0.053563	0.995431	-3.81703
ST7-AS2	0.287564	2.32063	2.07896	0.0537158	0.995431	-3.81875
PRR15	0.289565	6.12168	2.0786	0.0537526	0.995431	-3.81917
MUC22	0.343587	4.02487	2.0783	0.0537835	0.995431	-3.81951
SAFB2	0.293771	5.52391	2.07608	0.0540125	0.995431	-3.82208
TRIM2	0.31608	7.14985	2.07516	0.0541075	0.995431	-3.82315
ARL2BPP10	0.383426	2.89069	2.07482	0.0541426	0.995431	-3.82354
S1PR5	0.319162	3.49223	2.07443	0.0541832	0.995431	-3.82399
SLC39A8	0.457649	6.06176	2.07374	0.0542547	0.995431	-3.82479
CXCR2	0.334239	4.72596	2.07255	0.0543779	0.995431	-3.82616
ITGA6	0.360103	3.38726	2.07241	0.0543926	0.995431	-3.82633
NTAN1P3	0.266348	2.75023	2.07196	0.0544396	0.995431	-3.82685
TBK1	0.388544	4.87778	2.06963	0.0546824	0.995431	-3.82954
OR4L1	0.271772	1.96163	2.06773	0.054881	0.995431	-3.83173
IMP4	0.351643	2.7849	2.06767	0.0548872	0.995431	-3.8318
UBE2CP4	0.357046	3.00858	2.06731	0.0549249	0.995431	-3.83222
TIMM8BP2	0.291472	6.26386	2.06668	0.0549909	0.995431	-3.83294
APBB3	0.342119	3.40585	2.0651	0.0551574	0.995431	-3.83477
OR6T1	0.293285	3.27518	2.06509	0.0551583	0.995431	-3.83478
FBXO43	0.331736	2.16754	2.06477	0.0551919	0.995431	-3.83515
MSX1	0.408552	3.16149	2.06473	0.0551955	0.995431	-3.83519
MAD2L1BP	0.323139	5.03072	2.06465	0.0552048	0.995431	-3.83529
KRT18P60	0.37085	4.80674	2.06407	0.0552658	0.995431	-3.83596
RPL23AP39	0.303926	3.48226	2.06293	0.0553853	0.995431	-3.83727
PRELID3BP6	0.294211	2.31992	2.06245	0.0554363	0.995431	-3.83782
SF3A3P1	0.328402	3.11005	2.06141	0.0555468	0.995431	-3.83903
LINGO3	0.355523	4.0133	2.06125	0.0555631	0.995431	-3.8392
OR13C6P	0.292199	2.61842	2.06059	0.0556339	0.995431	-3.83997
CLIP2	0.30154	4.69827	2.05971	0.0557273	0.995431	-3.84099
TEKT2	0.352798	3.22803	2.05964	0.0557341	0.995431	-3.84106
PKD1L1	0.354964	2.73533	2.05866	0.055838	0.995431	-3.84219
KRT8P39	0.29297	4.48059	2.05728	0.0559856	0.995431	-3.84378
ZNF425	0.340541	3.43911	2.05702	0.0560131	0.995431	-3.84408
GUCA1B	0.305523	2.81432	2.05697	0.056019	0.995431	-3.84414
SNRPD2P1	0.253591	5.51688	2.05663	0.0560549	0.995431	-3.84453
SLC2A8	0.293664	3.01188	2.05589	0.0561342	0.995431	-3.84539
DGKK	0.307	2.20327	2.05586	0.0561375	0.995431	-3.84542
SYT10	0.278495	3.10708	2.05535	0.0561915	0.995431	-3.846
MAST1	0.252973	3.59896	2.05514	0.0562138	0.995431	-3.84624
RPL5P23	0.332434	2.4173	2.05379	0.0563586	0.995431	-3.8478
ANO3	0.341557	2.6631	2.05345	0.0563948	0.995431	-3.84819
OR51A5P	0.337665	1.98239	2.05317	0.0564258	0.995431	-3.84852
USP9YP3	0.320058	2.34306	2.05259	0.0564876	0.995431	-3.84918
MCEE	0.368171	2.96049	2.0523	0.0565184	0.995431	-3.84951
ADAMDEC1	0.429478	4.79473	2.05199	0.0565518	0.995431	-3.84987
DNAI2	0.334278	3.92753	2.05149	0.0566065	0.995431	-3.85045
CSPG4P5	0.287082	4.74285	2.05128	0.0566288	0.995431	-3.85069
SCX	0.30749	3.95127	2.05077	0.0566834	0.995431	-3.85127
SAMD10	0.269752	5.27741	2.04852	0.0569268	0.995431	-3.85386
C2CD4C	0.330995	5.28566	2.04817	0.0569651	0.995431	-3.85427
RPL30P2	0.278785	5.05615	2.04567	0.0572359	0.995431	-3.85713
MTND1P4	0.453048	3.57162	2.04539	0.0572672	0.995431	-3.85746
PWRN3	0.322738	2.75058	2.04503	0.0573063	0.995431	-3.85787
PDCL3P1	0.311814	3.38972	2.04413	0.0574042	0.995431	-3.85891
TRBV4-1	0.357669	3.69519	2.04299	0.0575284	0.995431	-3.86021
ASB16	0.317406	3.75316	2.04243	0.0575898	0.995431	-3.86086
PTH2R	0.313074	4.39335	2.04186	0.0576527	0.995431	-3.86152
DPEP2	0.279587	5.08129	2.04084	0.0577645	0.995431	-3.86268
IARS2	0.303524	4.39418	2.04013	0.0578419	0.995431	-3.86349
TEX13A	0.305012	4.48369	2.04008	0.0578472	0.995431	-3.86355
WBP2	0.313671	3.28895	2.03977	0.0578823	0.995431	-3.86391
SCARA3	0.325591	2.39418	2.03954	0.0579076	0.995431	-3.86418
THAP11	0.294296	3.40904	2.0377	0.0581098	0.995431	-3.86628
DDO	0.3038	4.59912	2.03737	0.0581457	0.995431	-3.86666
ZNRF1	0.265805	4.22373	2.03703	0.0581835	0.995431	-3.86705
HSPE1P2	0.317839	5.28616	2.03681	0.0582083	0.995431	-3.86731
MS4A8	0.338729	4.80538	2.03579	0.0583206	0.995431	-3.86847
CEACAMP8	0.328472	3.30476	2.03556	0.0583468	0.995431	-3.86874
OR13C5	0.316467	2.87401	2.03529	0.0583762	0.995431	-3.86905
DEFB113	0.39346	3.06243	2.0351	0.0583969	0.995431	-3.86926
HOXA5	0.281542	2.95283	2.03501	0.0584077	0.995431	-3.86937
CHN1	0.254687	3.51361	2.03464	0.0584481	0.995431	-3.86979
VCP	0.322469	5.138	2.03343	0.0585827	0.995431	-3.87118
ZNF263	0.271411	5.28394	2.03341	0.0585848	0.995431	-3.8712
SCN9A	0.334854	3.87821	2.03161	0.0587852	0.995431	-3.87326
SLC3A2	0.256109	6.90808	2.03148	0.0587993	0.995431	-3.87341
SPEF1	0.284873	5.39155	2.03128	0.0588223	0.995431	-3.87364
SLC5A9	0.337005	3.01395	2.03065	0.0588919	0.995431	-3.87436
KRT25	0.390924	3.68277	2.02987	0.0589792	0.995431	-3.87525
CKMT1A	0.34254	5.43701	2.02877	0.0591028	0.995431	-3.87652
C1orf43	0.327203	4.31586	2.02805	0.059183	0.995431	-3.87733
KCNJ2-AS1	0.312299	4.64495	2.02794	0.0591955	0.995431	-3.87746
FOXA1	0.368292	3.54252	2.02787	0.0592038	0.995431	-3.87755
DGAT1	0.321133	7.14379	2.02744	0.0592519	0.995431	-3.87804
EIF4A2	0.344688	6.97847	2.02584	0.0594323	0.995431	-3.87987
LZTS3	0.371725	5.37575	2.0249	0.0595378	0.995431	-3.88094
SLC41A3	0.286669	6.46871	2.02332	0.0597166	0.995431	-3.88275
ABO	0.416492	4.45581	2.02298	0.0597548	0.995431	-3.88314
THSD4-AS1	0.363307	3.21854	2.02205	0.0598599	0.995431	-3.8842
CA7	0.319272	2.61526	2.02189	0.0598776	0.995431	-3.88438
MAN2A2	0.36046	4.25017	2.02185	0.0598832	0.995431	-3.88443
DYNLL1P6	0.300738	4.12273	2.02182	0.0598858	0.995431	-3.88446
TBC1D7	0.460471	3.17319	2.01887	0.0602219	0.995431	-3.88784
COQ6	0.353832	3.06646	2.01863	0.0602488	0.995431	-3.88811
HIVEP2	0.324929	2.63869	2.01779	0.0603443	0.995431	-3.88906
DNAJB13	0.298832	3.80599	2.01695	0.0604406	0.995431	-3.89002
FTH1P20	0.321555	3.77296	2.01627	0.0605182	0.995431	-3.8908
ST6GALNAC2P1	0.380217	2.41936	2.01595	0.0605551	0.995431	-3.89116
RPL3P13	0.363236	3.13646	2.01331	0.0608585	0.995431	-3.89418
TTTY17A	0.310541	2.1447	2.01201	0.0610073	0.995431	-3.89565
DCAF11	0.280376	5.45943	2.01175	0.0610376	0.995431	-3.89595
SLC35F1	0.266046	2.87818	2.01149	0.061068	0.995431	-3.89625
ARSD	0.302543	3.3538	2.00931	0.0613204	0.995431	-3.89874
DNMT3A	0.351691	2.53791	2.0078	0.0614948	0.995431	-3.90045
RBM41	0.326187	3.95505	2.00708	0.0615789	0.995431	-3.90128
NPAP1P7	0.279115	4.93083	2.00511	0.0618081	0.995431	-3.90352
HSF2BP	0.361028	3.19262	2.00392	0.0619467	0.995431	-3.90487
IDH3B	0.27798	4.80385	2.0024	0.0621248	0.995431	-3.9066
AGR3	0.533578	4.12077	2.00204	0.0621679	0.995431	-3.90701
DDX3Y	0.391575	3.34719	2.00164	0.0622143	0.995431	-3.90746
PLA2G2D	0.30267	5.53477	2.00132	0.0622517	0.995431	-3.90783
NOL4L	0.271865	5.19144	2.00042	0.0623579	0.995431	-3.90885
OR2J4P	0.301089	2.33484	2.0003	0.0623717	0.995431	-3.90899
PNKDP1	0.286861	4.18374	1.99964	0.0624499	0.995431	-3.90974
ANO2	0.306728	3.23511	1.99935	0.062484	0.995431	-3.91007
IQCJ-SCHIP1-AS1	0.263172	2.1662	1.99773	0.0626743	0.995431	-3.9119
FOXL2NB	0.283771	3.74405	1.99738	0.0627163	0.995431	-3.91231
KCNC4	0.387131	2.98486	1.99552	0.0629365	0.995431	-3.91442
OR10R2	0.293657	5.33434	1.9955	0.0629391	0.995431	-3.91444
FBXL14	0.272031	5.06737	1.9951	0.0629857	0.995431	-3.91489
PHLDA2	0.272711	4.82578	1.99496	0.0630025	0.995431	-3.91505
RPSAP69	0.357362	5.7661	1.99448	0.0630598	0.995431	-3.9156
C15orf48	0.314637	5.70316	1.99419	0.0630938	0.995431	-3.91592
RPL23AP94	0.283712	5.10315	1.99318	0.0632145	0.995431	-3.91708
KRT8P5	0.273518	5.3922	1.99313	0.0632204	0.995431	-3.91713
RXRA	0.334242	4.43177	1.99262	0.0632815	0.995431	-3.91771
MTND6P12	0.256985	5.34911	1.99188	0.0633698	0.995431	-3.91855
CXXC5	0.35682	2.70852	1.99161	0.0634019	0.995431	-3.91886
GPC5	0.326851	2.04687	1.99106	0.0634669	0.995431	-3.91948
EML1	0.29591	2.11344	1.99001	0.063593	0.995431	-3.92067
SH3GL1P2	0.24989	3.44911	1.98965	0.0636366	0.995431	-3.92108
GRID2	0.301394	2.49231	1.98942	0.0636637	0.995431	-3.92134
RETN	0.321179	5.22033	1.9892	0.0636897	0.995431	-3.92159
NTN4	0.360096	3.72543	1.98915	0.063696	0.995431	-3.92165
OR11H3P	0.331913	4.34564	1.98833	0.0637939	0.995431	-3.92257
CCDC144A	0.263651	2.02363	1.98818	0.0638124	0.995431	-3.92275
TRIM74	0.340774	4.27995	1.98757	0.0638858	0.995431	-3.92344
PIK3IP1	0.305184	5.25801	1.98653	0.0640111	0.995431	-3.92462
RHOBTB3	0.314894	3.68061	1.98644	0.0640223	0.995431	-3.92472
MRPL15	0.331675	4.36116	1.98488	0.0642101	0.995431	-3.92649
FANCD2OS	0.398795	2.96663	1.98484	0.0642153	0.995431	-3.92654
TUBB8P1	0.358605	3.60522	1.98465	0.0642371	0.995431	-3.92674
IFNA13	0.3235	3.35257	1.98397	0.0643194	0.995431	-3.92751
RPL6P2	0.278276	5.68144	1.98355	0.0643709	0.995431	-3.92799
FAM111A	0.295814	5.42715	1.98269	0.0644751	0.995431	-3.92897
GSTZ1	0.253986	2.76122	1.98258	0.0644883	0.995431	-3.92909
TLX1	0.358786	4.10896	1.98179	0.0645839	0.995431	-3.92998
LIM2	0.383259	3.39578	1.98171	0.0645933	0.995431	-3.93007
FOXP1-IT1	0.283762	2.52859	1.98101	0.0646785	0.995431	-3.93086
BLM	0.320267	4.39376	1.98058	0.0647316	0.995431	-3.93136
FSHR	0.298188	2.24569	1.98056	0.0647338	0.995431	-3.93138
TAS2R40	0.321528	1.8868	1.98045	0.0647467	0.995431	-3.9315
HMGN1P15	0.306548	3.0328	1.9803	0.0647656	0.995431	-3.93167
ERBB2	0.272524	5.92101	1.9789	0.064936	0.995431	-3.93326
RPS29P28	0.281794	2.07876	1.97801	0.0650439	0.995431	-3.93426
ADAMTS8	0.286121	4.5202	1.97708	0.0651581	0.995431	-3.93531
MTCO1P51	0.362139	2.70152	1.97689	0.0651816	0.995431	-3.93553
ODAM	0.340601	3.80567	1.97529	0.0653773	0.995431	-3.93733
RPL35AP26	0.315557	3.24366	1.97512	0.0653987	0.995431	-3.93753
SLC20A1P1	0.334091	2.16833	1.97434	0.0654942	0.995431	-3.93841
RPS20P15	0.261622	2.38192	1.97374	0.0655675	0.995431	-3.93908
DACH1	0.436619	3.64246	1.9734	0.0656102	0.995431	-3.93947
TRBV2	0.329439	2.68166	1.97123	0.0658772	0.995431	-3.94192
RNF6P1	0.280172	1.98904	1.97104	0.0659006	0.995431	-3.94213
MTND4LP25	0.332417	2.39853	1.96993	0.066039	0.995431	-3.94339
UBE2W	0.350404	4.15328	1.96964	0.0660739	0.995431	-3.94371
MTND2P28	0.264632	10.4784	1.96751	0.0663392	0.995431	-3.94612
PUS7	0.343807	2.42757	1.96681	0.0664259	0.995431	-3.94691
MTCO2P12	0.24825	8.42786	1.96674	0.0664341	0.995431	-3.94698
KRT128P	0.270582	3.78716	1.96669	0.066441	0.995431	-3.94704
ICAM2	0.272101	3.41313	1.96571	0.0665633	0.995431	-3.94815
OR5W2	0.273796	1.84652	1.9649	0.0666638	0.995431	-3.94906
PAXIP1	0.368683	3.223	1.96203	0.0670236	0.995431	-3.95229
PSMF1	0.261578	7.28581	1.96145	0.0670959	0.995431	-3.95294
RPL13P6	0.33908	4.64359	1.96131	0.0671139	0.995431	-3.9531
RPL30P6	0.264241	2.03779	1.96062	0.067201	0.995431	-3.95388
SLC16A10	0.305895	3.97511	1.95876	0.0674348	0.995431	-3.95597
HAAO	0.300605	4.92559	1.95743	0.0676027	0.995431	-3.95747
NDEL1	0.291875	3.66312	1.95689	0.0676711	0.995431	-3.95807
TPT1P1	0.29365	3.38946	1.95675	0.067689	0.995431	-3.95823
VN1R51P	0.322199	2.4649	1.95659	0.0677099	0.995431	-3.95842
MYCN	0.271128	4.06513	1.95583	0.0678058	0.995431	-3.95927
TRMT112P4	0.286967	3.70969	1.9558	0.0678102	0.995431	-3.95931
PSKH2	0.264903	2.90141	1.95478	0.0679388	0.995431	-3.96045
NKX2-6	0.32131	4.48931	1.95449	0.0679761	0.995431	-3.96078
ATP2A2	0.287798	6.5268	1.95404	0.068033	0.995431	-3.96128
OR4D2	0.284157	4.03828	1.95378	0.0680665	0.995431	-3.96158
UQCRHP3	0.261869	2.46397	1.95364	0.0680839	0.995431	-3.96173
SH3TC2	0.266285	3.69036	1.95186	0.0683111	0.995431	-3.96373
NDUFB4P2	0.314833	2.90682	1.95149	0.068359	0.995431	-3.96415
KLHL1	0.320726	2.57206	1.95112	0.0684054	0.995431	-3.96456
KRT18P17	0.268015	4.92363	1.95079	0.0684482	0.995431	-3.96494
PLPP2	0.30299	6.0224	1.95	0.068549	0.995431	-3.96582
SEPHS2	0.285888	5.1043	1.94847	0.0687453	0.995431	-3.96754
PCSK6	0.336058	5.32562	1.94823	0.0687764	0.995431	-3.96781
CD27	0.294441	3.57407	1.94799	0.0688075	0.995431	-3.96808
RPL18P13	0.29935	7.19335	1.94718	0.0689113	0.995431	-3.96899
ST8SIA6-AS1	0.327938	2.69005	1.94657	0.0689893	0.995431	-3.96967
CBARP	0.327876	4.85089	1.94628	0.0690277	0.995431	-3.97
GEMIN4	0.291102	4.38268	1.94617	0.0690408	0.995431	-3.97012
UBE4B	0.293153	4.8065	1.94576	0.0690947	0.995431	-3.97059
GPRIN1	0.27886	5.39546	1.94539	0.0691415	0.995431	-3.97099
HTR1A	0.276304	2.90191	1.94535	0.0691471	0.995431	-3.97104
NOS3	0.322074	3.34802	1.94473	0.0692273	0.995431	-3.97174
UBL7-AS1	0.263838	4.58935	1.94151	0.0696447	0.995431	-3.97535
EPM2AIP1	0.268492	2.45146	1.93983	0.0698626	0.995431	-3.97722
TBCC	0.26172	3.64221	1.93982	0.0698647	0.995431	-3.97724
TMEM249	0.311761	3.07468	1.93938	0.0699213	0.995431	-3.97773
NR4A2	0.37025	3.89596	1.93884	0.0699924	0.995431	-3.97834
COLCA2	0.46782	4.8404	1.9388	0.0699973	0.995431	-3.97838
SLX1A-SULT1A3	0.284246	5.37277	1.93844	0.0700446	0.995431	-3.97879
AURKC	0.327444	3.54835	1.93826	0.0700675	0.995431	-3.97898
LARP7P1	0.403938	2.69203	1.93709	0.0702213	0.995431	-3.9803
PLK4	0.480082	2.83948	1.93683	0.0702553	0.995431	-3.98059
RPL12P41	0.260445	3.34619	1.93636	0.0703159	0.995431	-3.98111
PFN1P9	0.281511	2.02885	1.93608	0.0703536	0.995431	-3.98143
RPL35AP32	0.305694	4.28956	1.93578	0.0703924	0.995431	-3.98176
CNOT3	0.30156	4.56113	1.9354	0.0704421	0.995431	-3.98218
EPHA2	0.264654	4.68107	1.93523	0.0704644	0.995431	-3.98237
HEXIM2	0.269271	3.93386	1.93364	0.0706733	0.995431	-3.98415
GGTLC2	0.279118	4.90824	1.9329	0.0707717	0.995431	-3.98499
CTXN2	0.370446	2.33915	1.93282	0.0707813	0.995431	-3.98507
SNAI3	0.294532	5.80608	1.93259	0.0708122	0.995431	-3.98533
ZNF736P12Y	0.358831	2.14343	1.92953	0.0712164	0.995431	-3.98874
UGT2B10	0.345237	2.29326	1.92876	0.0713184	0.995431	-3.9896
OR1AC1P	0.279627	2.59136	1.92802	0.0714174	0.995431	-3.99044
PROK2	0.539926	4.62191	1.92776	0.0714511	0.995431	-3.99072
TUFT1	0.335579	4.60791	1.92759	0.0714749	0.995431	-3.99092
EIF4BP8	0.314415	3.68967	1.92734	0.0715073	0.995431	-3.99119
GAPDHP73	0.261202	3.57973	1.92718	0.0715291	0.995431	-3.99137
LRRC52	0.307628	2.60941	1.92663	0.0716023	0.995431	-3.99199
PLET1	0.333267	2.02284	1.926	0.0716862	0.995431	-3.99269
MTND5P19	0.256152	2.85655	1.92597	0.0716907	0.995431	-3.99273
ERICH6	0.299044	2.77047	1.92513	0.071802	0.995431	-3.99366
PRR23A	0.304542	2.29199	1.9246	0.0718723	0.995431	-3.99424
PAX5	0.32042	4.74918	1.92398	0.0719561	0.995431	-3.99494
OR4C6	0.316008	1.9528	1.92354	0.072015	0.995431	-3.99543
C4BPA	0.290462	3.29791	1.92301	0.0720859	0.995431	-3.99602
OSTM1-AS1	0.306268	3.21734	1.9226	0.0721404	0.995431	-3.99648
RNF169	0.306075	4.60196	1.92213	0.0722042	0.995431	-3.99701
OR8B1P	0.341637	2.29321	1.92204	0.0722155	0.995431	-3.9971
RPL23AP61	0.338285	3.73185	1.92186	0.0722394	0.995431	-3.9973
PRAMEF14	0.286345	2.27651	1.92167	0.0722657	0.995431	-3.99752
PKMYT1	0.295766	3.44888	1.92116	0.0723345	0.995431	-3.99809
HSPE1P10	0.341092	2.78427	1.91982	0.0725148	0.995431	-3.99958
VTCN1	0.363227	2.78461	1.91979	0.072518	0.995431	-3.99961
KLB	0.356426	3.18423	1.91901	0.0726234	0.995431	-4.00048
N4BP1	0.278622	3.80397	1.919	0.0726246	0.995431	-4.00049
SLC27A3	0.282301	4.44121	1.91898	0.0726275	0.995431	-4.00051
SOX17	0.27916	5.02178	1.91844	0.0727007	0.995431	-4.00112
CDH17	0.421928	5.74404	1.91781	0.0727856	0.995431	-4.00182
MTND5P2	0.421013	4.5511	1.91738	0.0728432	0.995431	-4.00229
PIK3CG	0.403572	3.61914	1.91707	0.0728862	0.995431	-4.00265
OR12D1	0.275197	2.69252	1.91685	0.0729154	0.995431	-4.00289
DYRK2	0.257164	3.47251	1.91591	0.0730423	0.995431	-4.00393
PSMD10	0.270425	4.63055	1.91567	0.073076	0.995431	-4.0042
NELFB	0.284403	5.13682	1.91537	0.0731163	0.995431	-4.00453
FAM183DP	0.28789	4.17493	1.91509	0.0731539	0.995431	-4.00484
VIT	0.261088	2.09046	1.91484	0.0731874	0.995431	-4.00512
ZNF660	0.34229	3.50289	1.91484	0.0731879	0.995431	-4.00512
SRSF5	0.295781	5.80654	1.91438	0.0732508	0.995431	-4.00564
NUP210	0.293354	4.15448	1.91414	0.0732831	0.995431	-4.0059
DLGAP5	0.352713	2.25226	1.91388	0.0733182	0.995431	-4.00619
CPS1	0.386152	4.22974	1.91345	0.0733772	0.995431	-4.00667
PANO1	0.300591	4.51132	1.9131	0.0734242	0.995431	-4.00705
SFR1P2	0.254869	2.22251	1.91286	0.0734572	0.995431	-4.00732
SNORA19	0.311561	4.41885	1.91241	0.0735193	0.995431	-4.00783
KRT8P28	0.294704	3.40602	1.91069	0.073753	0.995431	-4.00973
LRRC45	0.323789	4.11067	1.91023	0.0738166	0.995431	-4.01025
BMP5	0.401148	2.72263	1.90931	0.0739428	0.995431	-4.01127
RPS7P12	0.269314	2.16746	1.90868	0.0740288	0.995431	-4.01197
LPAR3	0.255519	3.94428	1.90811	0.0741073	0.995431	-4.0126
KRT8P49	0.262824	4.45685	1.90795	0.0741287	0.995431	-4.01278
RPS24P16	0.259608	5.48034	1.90774	0.0741577	0.995431	-4.01301
PDE2A	0.418872	2.37584	1.90639	0.0743434	0.995431	-4.01451
RSL24D1P3	0.238981	2.22643	1.9052	0.0745077	0.995431	-4.01583
ARID3A	0.244768	7.41008	1.90507	0.0745256	0.995431	-4.01598
SSU72P6	0.307364	2.3989	1.90455	0.0745974	0.995431	-4.01655
GINS2	0.294226	4.16376	1.90427	0.0746369	0.995431	-4.01687
TPT1P3	0.280037	4.09358	1.90367	0.0747193	0.995431	-4.01753
KDM2B	0.297765	3.9574	1.90339	0.0747585	0.995431	-4.01784
CASP6	0.348918	4.51286	1.90286	0.0748315	0.995431	-4.01843
SNORD59A	0.42578	3.05069	1.90141	0.0750332	0.995431	-4.02004
PAPSS2	0.257169	5.04849	1.90095	0.0750963	0.995431	-4.02054
MAP3K10	0.316492	4.83437	1.8999	0.075242	0.995431	-4.02171
CCDC138	0.355737	4.39383	1.89925	0.0753327	0.995431	-4.02243
FAM72B	0.41798	2.52149	1.89863	0.0754192	0.995431	-4.02311
CLRN2	0.275116	2.94557	1.89786	0.0755266	0.995431	-4.02397
TRAV10	0.292676	2.98536	1.89708	0.0756366	0.995431	-4.02484
PUDPP1	0.253115	3.00338	1.89673	0.0756851	0.995431	-4.02522
FAM98B	0.26599	2.62599	1.89602	0.075785	0.995431	-4.02601
NOS1	0.292288	2.68231	1.89542	0.0758687	0.995431	-4.02667
WFDC6	0.347336	3.45667	1.89497	0.0759317	0.995431	-4.02717
CAPN6	0.318077	2.97578	1.89491	0.0759401	0.995431	-4.02723
GTF2IRD2	0.252925	5.20491	1.89486	0.0759471	0.995431	-4.02729
PIN1P1	0.264066	5.37138	1.89302	0.0762065	0.995431	-4.02933
DNAJC16	0.405143	5.10606	1.89296	0.076214	0.995431	-4.02939
TRMT2A	0.411617	3.97524	1.89296	0.0762146	0.995431	-4.02939
MYL6P4	0.247776	3.90755	1.89289	0.0762238	0.995431	-4.02947
ACSBG2	0.240826	1.99218	1.89281	0.0762362	0.995431	-4.02956
SLIT1	0.294672	3.38654	1.89264	0.0762594	0.995431	-4.02975
RPL21P17	0.251176	5.01415	1.89174	0.076387	0.995431	-4.03075
XKRYP3	0.306677	2.03441	1.89149	0.0764216	0.995431	-4.03102
KCNK3	0.23919	3.09375	1.8901	0.076618	0.995431	-4.03255
COPA	0.30674	2.62267	1.89003	0.0766278	0.995431	-4.03263
MYOT	0.36956	2.39427	1.88925	0.0767384	0.995431	-4.03349
CRHR2	0.299448	3.15783	1.88847	0.0768487	0.995431	-4.03435
PPP3CB-AS1	0.314501	2.47868	1.88741	0.0770003	0.995431	-4.03553
CS	0.33306	6.06486	1.88733	0.0770114	0.995431	-4.03562
AHSG	0.316719	2.52719	1.8865	0.0771296	0.995431	-4.03653
SEMA6B	0.297885	4.53005	1.88594	0.0772089	0.995431	-4.03715
HERPUD1	0.325163	4.30127	1.88581	0.0772269	0.995431	-4.03729
OPALIN	0.28038	3.06273	1.88578	0.0772325	0.995431	-4.03733
RPL21P50	0.284588	3.69288	1.88455	0.077408	0.995431	-4.03869
ATPAF1	0.283339	2.38319	1.88439	0.0774297	0.995431	-4.03886
SNORD22	0.569268	4.78728	1.88329	0.0775873	0.995431	-4.04007
TBX6	0.232399	4.51869	1.88309	0.0776154	0.995431	-4.04029
SLC7A9	0.298542	2.35372	1.88302	0.0776263	0.995431	-4.04037
IMPDH1P10	0.307999	4.05541	1.8829	0.0776426	0.995431	-4.0405
KRTDAP	0.252576	3.16413	1.88243	0.0777102	0.995431	-4.04102
FOXA2	0.268672	3.24055	1.88237	0.0777185	0.995431	-4.04108
OR5D17P	0.293697	3.08713	1.88078	0.0779476	0.995431	-4.04284
SNORD20	0.437534	3.24361	1.8805	0.0779876	0.995431	-4.04315
RPL7P13	0.275064	3.01593	1.88024	0.0780248	0.995431	-4.04344
IPO4	0.289471	3.69962	1.87994	0.0780685	0.995431	-4.04377
XAB2	0.346615	3.28852	1.87984	0.0780824	0.995431	-4.04388
MPP5	0.274332	4.11074	1.87968	0.0781054	0.995431	-4.04405
POTEH-AS1	0.330352	1.8441	1.87918	0.0781772	0.995431	-4.0446
C5orf63	0.392095	3.19969	1.87787	0.0783663	0.995431	-4.04605
HNRNPA3P9	0.275061	4.35859	1.87755	0.0784125	0.995431	-4.0464
ZNF629	0.287275	5.19407	1.87746	0.078425	0.995431	-4.04649
KLHDC7A	0.327779	2.90503	1.87706	0.0784832	0.995431	-4.04694
RPL30P1	0.271746	2.16418	1.87679	0.0785225	0.995431	-4.04724
ANKDD1B	0.28679	2.29607	1.87631	0.0785914	0.995431	-4.04776
TPT1P6	0.261581	4.41915	1.87585	0.0786586	0.995431	-4.04827
A1CF	0.39	3.67938	1.87582	0.0786628	0.995431	-4.0483
ZP4	0.282048	2.12949	1.87514	0.078762	0.995431	-4.04906
SLC6A14	0.314779	2.40147	1.87457	0.0788449	0.995431	-4.04969
CORO2A	0.331948	4.67353	1.87374	0.078965	0.995431	-4.0506
SPTLC2	0.428741	3.28721	1.87354	0.0789943	0.995431	-4.05082
ADH6	0.248705	4.7614	1.8734	0.0790147	0.995431	-4.05097
CCDC113	0.262991	1.99474	1.8732	0.079043	0.995431	-4.05119
RPL17P33	0.359433	2.9159	1.87301	0.0790711	0.995431	-4.0514
KIF14	0.29729	2.35068	1.8727	0.0791165	0.995431	-4.05174
OR6N2	0.300859	2.58428	1.87259	0.0791328	0.995431	-4.05186
ZNF432	0.302629	5.75862	1.87211	0.0792023	0.995431	-4.05239
GRK4	0.302433	2.47162	1.87148	0.079294	0.995431	-4.05308
HAO2-IT1	0.329708	3.51965	1.87017	0.0794854	0.995431	-4.05452
ND6	0.250162	9.29629	1.86978	0.0795429	0.995431	-4.05495
CMTM5	0.365706	4.08143	1.86938	0.0796014	0.995431	-4.05539
FSCN2	0.285723	4.75781	1.86883	0.079681	0.995431	-4.05599
ADAD1P2	0.284137	3.08674	1.86874	0.0796951	0.995431	-4.05609
SRI	0.292711	5.23325	1.8676	0.0798618	0.995431	-4.05734
COX6B1P5	0.242295	2.38592	1.86657	0.0800126	0.995431	-4.05847
TFAP2B	0.307768	3.54895	1.86649	0.0800253	0.995431	-4.05856
CCNT2	0.412485	4.95149	1.8661	0.0800829	0.995431	-4.05899
LRIT1	0.301387	2.88162	1.8655	0.0801701	0.995431	-4.05964
TTC39A	0.313877	3.47314	1.86526	0.080206	0.995431	-4.05991
PRKAR2A	0.336329	4.57262	1.86475	0.0802812	0.995431	-4.06047
HDDC3	0.272265	4.94823	1.86445	0.0803257	0.995431	-4.0608
BCAN	0.373431	4.12778	1.86394	0.0804004	0.995431	-4.06136
AP4E1	0.253747	2.38062	1.86287	0.0805594	0.995431	-4.06254
TRIM60P9Y	0.305119	2.88877	1.86236	0.080635	0.995431	-4.0631
CYB5D1	0.271884	3.62607	1.8621	0.0806727	0.995431	-4.06338
HNRNPKP5	0.304233	2.62542	1.86199	0.0806899	0.995431	-4.0635
CAPS	0.248547	5.32282	1.86089	0.0808521	0.995431	-4.0647
MTND5P34	0.249493	1.96735	1.8605	0.080911	0.995431	-4.06514
NBEAL2	0.317076	4.60397	1.8599	0.0809994	0.995431	-4.06579
NAT14	0.270277	6.46956	1.85933	0.0810837	0.995431	-4.06641
SLC36A3	0.299914	3.129	1.85911	0.0811173	0.995431	-4.06666
ATP2A3	0.306064	6.64711	1.85905	0.0811258	0.995431	-4.06672
CYCSP8	0.329372	3.9261	1.85901	0.0811314	0.995431	-4.06676
UGT2B28	0.38543	2.0847	1.85868	0.081181	0.995431	-4.06712
ADAMTS17	0.314256	5.96154	1.85798	0.0812855	0.995431	-4.06789
STK11	0.263077	5.82947	1.85746	0.0813624	0.995431	-4.06846
CCL28	0.42262	4.91886	1.85687	0.0814517	0.995431	-4.06911
NENFP2	0.269823	3.46805	1.85659	0.0814937	0.995431	-4.06942
EBF3	0.334588	4.0826	1.85637	0.0815253	0.995431	-4.06965
RASGRP2	0.230345	5.40392	1.8557	0.0816257	0.995431	-4.07039
HAR1B	0.256278	2.71355	1.85569	0.0816273	0.995431	-4.0704
SLPI	0.307015	6.68172	1.85551	0.0816548	0.995431	-4.0706
MBD1	0.245365	5.47149	1.85543	0.0816663	0.995431	-4.07068
C8G	0.376614	3.87179	1.85488	0.0817483	0.995431	-4.07128
ITGB1BP2	0.309572	3.05857	1.85485	0.0817532	0.995431	-4.07132
BCAS2P3	0.305637	1.93852	1.85407	0.0818707	0.995431	-4.07217
ADGRE1	0.317593	3.20049	1.85384	0.081905	0.995431	-4.07242
EFCAB1	0.247835	1.87625	1.85379	0.0819127	0.995431	-4.07248
MT-TM	0.240632	12.0415	1.85377	0.0819159	0.995431	-4.0725
RPS3AP43	0.24616	3.45352	1.85343	0.0819672	0.995431	-4.07288
ZNF385D-AS1	0.305316	2.1377	1.85322	0.0819978	0.995431	-4.0731
RBP5	0.31574	3.7711	1.85319	0.0820027	0.995431	-4.07313
APOL5	0.298242	2.6386	1.85307	0.0820212	0.995431	-4.07327
MAPT-IT1	0.299836	2.70221	1.85303	0.0820272	0.995431	-4.07331
ASXL3	0.28297	2.28134	1.85272	0.0820729	0.995431	-4.07364
SLC1A4	0.296184	4.00044	1.85271	0.0820745	0.995431	-4.07366
NHSL1	0.298772	5.70031	1.85269	0.0820782	0.995431	-4.07368
C17orf77	0.274421	3.73675	1.85184	0.0822057	0.995431	-4.07461
ABHD12	0.269061	4.76496	1.85061	0.0823908	0.995431	-4.07595
ZNF771	0.245212	3.7827	1.84978	0.0825165	0.995431	-4.07686
RAC1P7	0.258875	3.16062	1.84978	0.0825166	0.995431	-4.07686
PTCD2P1	0.332071	2.94751	1.84976	0.0825195	0.995431	-4.07688
ACSM1	0.367441	2.9523	1.8471	0.082922	0.995431	-4.07978
C6	0.300055	3.46944	1.84643	0.0830237	0.995431	-4.08051
UNQ6494	0.290206	4.02731	1.84622	0.0830557	0.995431	-4.08074
OR7E14P	0.314203	4.94747	1.84514	0.0832213	0.995431	-4.08193
DGKI	0.238716	2.31456	1.84512	0.0832234	0.995431	-4.08195
GAPDHP16	0.344227	2.5702	1.84505	0.0832335	0.995431	-4.08202
NRTN	0.292784	5.41404	1.84455	0.0833109	0.995431	-4.08257
GRTP1	0.2668	4.34874	1.84453	0.0833137	0.995431	-4.08259
FARSBP1	0.252432	2.32086	1.84366	0.0834458	0.995431	-4.08354
OVCH1	0.268643	3.40923	1.84365	0.0834473	0.995431	-4.08355
SPDYE1	0.249191	3.3386	1.8436	0.083455	0.995431	-4.0836
PPP6R2	0.256263	5.19251	1.84344	0.0834801	0.995431	-4.08378
OFD1	0.43417	6.58483	1.84149	0.0837785	0.995431	-4.08591
GAPDHP17	0.258781	2.5858	1.84086	0.0838743	0.995431	-4.08659
ENTPD6	0.395323	4.11592	1.8392	0.0841298	0.995431	-4.0884
SERPINB3	0.293465	1.91469	1.83893	0.0841717	0.995431	-4.0887
RAD51-AS1	0.328917	4.1652	1.83857	0.0842262	0.995431	-4.08909
CLEC12B	0.259456	2.78826	1.83711	0.0844507	0.995431	-4.09067
RSBN1	0.28249	4.80702	1.83604	0.0846161	0.995431	-4.09184
KRBOX4	0.238339	2.39976	1.83506	0.0847683	0.995431	-4.09291
GTF2IP3	0.27686	3.02886	1.8347	0.0848246	0.995431	-4.0933
IFNWP19	0.24254	3.96197	1.83424	0.0848949	0.995431	-4.0938
BCL9L	0.30064	5.57525	1.83319	0.0850587	0.995431	-4.09495
BCRP3	0.291918	4.99746	1.83295	0.0850956	0.995431	-4.0952
CDC42EP5	0.269551	4.44908	1.83281	0.0851173	0.995431	-4.09536
FOXO4	0.318412	3.92348	1.83107	0.0853875	0.995431	-4.09724
TMEM238	0.240588	6.4397	1.83066	0.0854522	0.995431	-4.09769
SNORA24	0.324666	8.14082	1.83035	0.0855002	0.995431	-4.09803
RPSAP9	0.385096	2.72011	1.82993	0.0855658	0.995431	-4.09849
RPL5P1	0.2612	5.83543	1.82968	0.0856047	0.995431	-4.09876
TUBB8P2	0.248229	4.81666	1.82966	0.085607	0.995431	-4.09877
RPS27P14	0.258706	5.21674	1.82946	0.0856393	0.995431	-4.099
SLC35F4	0.374452	3.28679	1.82931	0.0856618	0.995431	-4.09915
PCDH9-AS3	0.248739	1.80348	1.82808	0.085854	0.995431	-4.10049
OR6K2	0.261249	2.03357	1.82685	0.086048	0.995431	-4.10183
CHRNA5	0.383515	3.87741	1.82575	0.0862195	0.995431	-4.10302
OR10A3	0.253836	1.75185	1.82545	0.0862679	0.995431	-4.10335
ASIC1	0.347647	2.81886	1.82499	0.08634	0.995431	-4.10385
SHB	0.287589	4.61601	1.82344	0.0865837	0.995431	-4.10552
GATM	0.323826	3.65596	1.82328	0.0866088	0.995431	-4.1057
LYPD3	0.260536	4.44519	1.82217	0.086784	0.995431	-4.1069
EIF4ENIF1	0.303235	4.3868	1.82213	0.08679	0.995431	-4.10694
CNST	0.238554	2.29598	1.82117	0.0869424	0.995431	-4.10798
MIXL1	0.369297	4.06552	1.82115	0.086946	0.995431	-4.10801
BCL2L10	0.275155	3.79862	1.82037	0.08707	0.995431	-4.10886
CCNL1	0.300471	4.64554	1.82027	0.0870844	0.995431	-4.10896
MED13	0.345385	6.00175	1.82009	0.0871136	0.995431	-4.10915
UQCC3	0.249467	7.80599	1.82001	0.0871259	0.995431	-4.10924
POLH	0.257559	5.23572	1.81977	0.0871643	0.995431	-4.1095
ELOVL6	0.310736	4.94491	1.81881	0.0873172	0.995431	-4.11054
SPDEF	0.278295	3.83163	1.81877	0.0873234	0.995431	-4.11059
TUFM	0.246293	4.84963	1.81804	0.0874396	0.995431	-4.11138
CACNA2D3	0.473902	2.22501	1.81748	0.0875288	0.995431	-4.11198
GRM3	0.235562	3.3897	1.81727	0.0875619	0.995431	-4.11221
C9orf85	0.340456	5.88419	1.81499	0.0879259	0.995431	-4.11468
HBQ1	0.244063	3.58062	1.81498	0.0879279	0.995431	-4.11469
CDK10	0.28374	3.69515	1.81492	0.0879366	0.995431	-4.11475
RPS2P5	0.264756	7.70768	1.81384	0.0881091	0.995431	-4.11591
SLC35A4	0.258134	4.11965	1.81368	0.088135	0.995431	-4.11609
NDNF	0.28215	4.49446	1.81349	0.0881651	0.995431	-4.11629
FAM72A	0.335318	2.36285	1.81335	0.088188	0.995431	-4.11645
DPYD-AS1	0.276525	2.00591	1.81296	0.0882514	0.995431	-4.11687
CXXC1P1	0.243641	2.9927	1.81178	0.0884395	0.995431	-4.11814
RPRM	0.27411	3.47239	1.81122	0.0885297	0.995431	-4.11874
SPINT1	0.264839	6.34521	1.81116	0.0885397	0.995431	-4.11881
RCC2P7	0.288088	3.88251	1.81047	0.0886513	0.995431	-4.11956
PAX3	0.239019	2.94006	1.81013	0.0887058	0.995431	-4.11993
NHP2P1	0.252781	4.34446	1.80999	0.0887283	0.995431	-4.12008
CA12	0.23871	5.68972	1.80887	0.0889093	0.995431	-4.12129
FAXC	0.268284	2.68269	1.8085	0.0889684	0.995431	-4.12168
TSFM	0.293123	5.07716	1.80828	0.0890036	0.995431	-4.12192
RPL37P1	0.267784	4.43425	1.80816	0.0890244	0.995431	-4.12206
NQO1	0.311145	3.93525	1.80787	0.0890699	0.995431	-4.12236
PRAP1	0.254054	4.4414	1.80647	0.0892964	0.995431	-4.12387
CDH1	0.356293	7.10033	1.80645	0.0892996	0.995431	-4.12389
PLPPR5	0.248614	1.95621	1.80611	0.0893555	0.995431	-4.12426
BHLHE22	0.251687	5.607	1.80511	0.0895175	0.995431	-4.12534
IGLV3-30	0.260336	5.49119	1.80441	0.0896319	0.995431	-4.1261
BPY2B	0.276109	2.25623	1.80426	0.0896567	0.995431	-4.12626
CDA	0.332954	2.87002	1.80399	0.0896998	0.995431	-4.12655
SYPL2	0.268962	4.39988	1.80332	0.0898083	0.995431	-4.12726
ARL14EPL	0.362745	2.14449	1.80327	0.0898169	0.995431	-4.12732
GEMIN5	0.249706	3.53869	1.80303	0.089856	0.995431	-4.12758
KSR1	0.306193	3.87712	1.8028	0.0898944	0.995431	-4.12783
SNX6	0.307163	4.98906	1.80265	0.0899175	0.995431	-4.12799
SLC30A10	0.305832	3.13003	1.80258	0.0899288	0.995431	-4.12806
LRRC1	0.323981	3.79195	1.80238	0.0899614	0.995431	-4.12828
CDX2	0.309416	5.46443	1.8019	0.0900406	0.995431	-4.1288
KCNJ5	0.256061	3.88363	1.80176	0.0900626	0.995431	-4.12894
CYP4X1	0.342895	2.55498	1.80129	0.0901408	0.995431	-4.12946
PPIAP26	0.302624	3.93744	1.8012	0.0901541	0.995431	-4.12955
METTL1	0.313534	4.70006	1.80115	0.0901632	0.995431	-4.12961
RINL	0.246851	4.8105	1.8006	0.0902525	0.995431	-4.13019
USP17L21	0.238049	2.31508	1.80038	0.0902895	0.995431	-4.13044
SDAD1P2	0.26476	2.21743	1.79933	0.0904616	0.995431	-4.13157
MTRNR2L10	0.269038	2.91564	1.79906	0.0905055	0.995431	-4.13186
DUSP4	0.290028	5.01903	1.79892	0.0905279	0.995431	-4.132
PCA3	0.26045	3.36689	1.79859	0.0905818	0.995431	-4.13236
DEFB133	0.269932	2.22954	1.79823	0.0906413	0.995431	-4.13275
MLXIPL	0.310162	5.42666	1.79794	0.0906884	0.995431	-4.13306
OR2B4P	0.316314	2.49073	1.79758	0.0907488	0.995431	-4.13345
NR1H5P	0.248124	1.71043	1.79717	0.0908151	0.995431	-4.13388
MTCYBP19	0.237406	1.67996	1.79517	0.0911447	0.995431	-4.13604
MAP4K2	0.308177	3.75114	1.79409	0.0913237	0.995431	-4.1372
PTPN18	0.27689	5.75093	1.79381	0.0913702	0.995431	-4.1375
GAPDHP38	0.398913	3.58918	1.79304	0.0914978	0.995431	-4.13833
IQSEC1	0.260227	2.80653	1.79297	0.0915088	0.995431	-4.1384
FAM27E3	0.313334	5.89058	1.79198	0.0916724	0.995431	-4.13946
ZFP42	0.234663	1.97202	1.79174	0.0917124	0.995431	-4.13972
ATP6V1H	0.250221	2.3279	1.79133	0.0917805	0.995431	-4.14016
NDUFA12P1	0.284322	2.82704	1.79122	0.0917985	0.995431	-4.14028
LDHAL6DP	0.247367	3.37741	1.79089	0.0918542	0.995431	-4.14064
FOXD3	0.303952	3.16462	1.79072	0.0918825	0.995431	-4.14082
CDH4	0.28363	3.43387	1.79066	0.091892	0.995431	-4.14088
GABRD	0.262982	2.4087	1.79029	0.0919539	0.995431	-4.14128
TRIM55	0.255121	3.13585	1.79026	0.0919591	0.995431	-4.14131
MLN	0.266658	4.2928	1.7899	0.0920178	0.995431	-4.14169
SETP1	0.251592	3.50925	1.78975	0.0920439	0.995431	-4.14186
VTA1	0.339986	4.59408	1.78904	0.0921616	0.995431	-4.14262
ZNF311	0.276587	3.68806	1.78884	0.0921952	0.995431	-4.14283
SLC6A7	0.305152	4.11967	1.78843	0.0922631	0.995431	-4.14327
ARL4A	0.322969	4.08955	1.78745	0.0924273	0.995431	-4.14433
MCIDAS	0.273717	2.5262	1.78683	0.0925304	0.995431	-4.14499
TRBV5-1	0.278819	3.10707	1.78653	0.0925808	0.995431	-4.14531
SLC4A11	0.309186	4.69508	1.78621	0.0926343	0.995431	-4.14565
RAX	0.303207	3.96945	1.78617	0.0926406	0.995431	-4.14569
FAM114A2	0.371291	5.05269	1.78615	0.0926438	0.995431	-4.14571
SMAD6	0.503753	3.18291	1.78577	0.0927084	0.995431	-4.14613
VN1R9P	0.268831	1.99631	1.78558	0.0927389	0.995431	-4.14632
C11orf98	0.242851	6.76655	1.78552	0.0927503	0.995431	-4.1464
NUDT16L1	0.245771	6.09215	1.78538	0.092773	0.995431	-4.14654
PKD2L1	0.258241	3.36118	1.78423	0.0929661	0.995431	-4.14777
PRAMEF34P	0.263887	2.45316	1.78402	0.0930017	0.995431	-4.148
SZT2	0.245775	5.76978	1.78329	0.0931239	0.995431	-4.14878
HOXB7	0.271291	6.51187	1.78269	0.093225	0.995431	-4.14942
EPB41L4B	0.273841	4.8435	1.78266	0.0932304	0.995431	-4.14946
HPRT1P3	0.280127	2.02834	1.78152	0.093423	0.995431	-4.15068
RPS2	0.315666	4.6434	1.78119	0.0934781	0.995431	-4.15103
RBFOX3	0.320891	3.96848	1.78039	0.093612	0.995431	-4.15188
ABCA6	0.2888	2.673	1.77955	0.0937555	0.995431	-4.15279
C4orf3	0.227473	3.84951	1.77948	0.0937663	0.995431	-4.15285
HSD17B13	0.2836	2.46791	1.77925	0.0938052	0.995431	-4.1531
MMP3	0.320588	3.87774	1.77902	0.0938441	0.995431	-4.15334
CALML4	0.2735	7.3266	1.77867	0.0939031	0.995431	-4.15372
FLJ35934	0.22094	4.40975	1.77812	0.0939978	0.995431	-4.15431
GLO1	0.252495	3.75181	1.77742	0.0941161	0.995431	-4.15506
TRIM26BP	0.236671	3.84518	1.77684	0.0942136	0.995431	-4.15567
TAGLN2	0.286156	6.57221	1.77648	0.094275	0.995431	-4.15606
EPPIN	0.313633	2.52371	1.77606	0.0943464	0.995431	-4.15651
LRRC27	0.243569	3.95566	1.77604	0.0943505	0.995431	-4.15653
NOSTRIN	0.387104	4.83897	1.77593	0.0943692	0.995431	-4.15665
IQGAP3	0.237674	4.53105	1.77588	0.0943779	0.995431	-4.15671
C14orf132	0.259209	2.57394	1.77545	0.0944512	0.995431	-4.15717
DNASE2	0.289887	3.5408	1.77532	0.0944725	0.995431	-4.1573
RBM44	0.228258	2.32565	1.77513	0.0945057	0.995431	-4.15751
PFKP	0.267468	8.13119	1.77496	0.0945348	0.995431	-4.15769
GRIN3B	0.234769	4.15301	1.77485	0.0945522	0.995431	-4.1578
LATS2-AS1	0.247702	1.90488	1.77478	0.0945646	0.995431	-4.15788
ACOT7	0.275868	3.78749	1.77447	0.0946179	0.995431	-4.15821
FMO5	0.315417	3.5486	1.7741	0.0946815	0.995431	-4.15861
FNDC7	0.249616	2.5563	1.77328	0.0948205	0.995431	-4.15948
ACTG1P18	0.26076	2.48632	1.77298	0.0948713	0.995431	-4.15979
MAGI2-AS2	0.284154	1.90447	1.77285	0.0948935	0.995431	-4.15993
GUCY2D	0.239836	6.25014	1.77282	0.0948986	0.995431	-4.15997
PRELID1P1	0.244582	5.52911	1.77256	0.0949442	0.995431	-4.16025
MREGP1	0.237325	4.21862	1.77249	0.0949551	0.995431	-4.16032
HIBADH	0.268434	2.43106	1.77233	0.0949824	0.995431	-4.16049
OR5P2	0.273354	1.8016	1.77128	0.0951627	0.995431	-4.16161
RPL17P35	0.244254	2.52447	1.77023	0.0953434	0.995431	-4.16273
TGM3	0.232807	6.0319	1.76957	0.0954562	0.995431	-4.16343
NAF1	0.262267	3.64334	1.76912	0.0955331	0.995431	-4.16391
RPL11	0.254724	9.46171	1.76876	0.0955963	0.995431	-4.1643
DCAF4L2	0.344859	2.31376	1.76831	0.0956728	0.995431	-4.16478
SPDYA	0.283825	2.14372	1.76831	0.0956729	0.995431	-4.16478
C12orf42	0.233665	3.29609	1.7677	0.0957784	0.995431	-4.16543
CHL1-AS1	0.232305	3.42947	1.76765	0.0957867	0.995431	-4.16548
PSTPIP1	0.224574	5.50441	1.76731	0.095846	0.995431	-4.16585
ATG12P2	0.337219	2.22981	1.76665	0.0959592	0.995431	-4.16655
TLE1	0.301326	3.91061	1.76658	0.095971	0.995431	-4.16662
SLC11A2	0.337158	3.25069	1.76634	0.0960133	0.995431	-4.16688
SLC12A9	0.323041	4.51602	1.76617	0.0960426	0.995431	-4.16706
TNNI1	0.262041	4.04908	1.76562	0.0961371	0.995431	-4.16764
LRRC37A12P	0.326974	2.95768	1.76544	0.0961687	0.995431	-4.16784
PPP1R1B	0.247549	6.57753	1.76458	0.0963176	0.995431	-4.16875
HOTTIP	0.301683	4.7132	1.76411	0.0963992	0.995431	-4.16925
SESN1	0.31611	3.43361	1.76387	0.096441	0.995431	-4.16951
FAM86KP	0.280315	3.76655	1.76348	0.0965083	0.995431	-4.16992
NT5CP1	0.261093	4.45824	1.76303	0.0965863	0.995431	-4.1704
SLC6A8	0.341918	4.85753	1.76283	0.0966206	0.995431	-4.17061
BMP7	0.267478	4.85966	1.76264	0.0966536	0.995431	-4.17081
LDB3	0.349006	4.21663	1.76118	0.0969074	0.995431	-4.17236
NEK8	0.319862	2.8804	1.76072	0.0969873	0.995431	-4.17285
MTND6P18	0.301419	5.3378	1.76046	0.0970329	0.995431	-4.17313
CYP3A5	0.465699	4.27328	1.76046	0.097033	0.995431	-4.17313
CYP2W1	0.29432	6.08666	1.75969	0.0971669	0.995431	-4.17395
ZNF296	0.337488	3.32168	1.75965	0.0971746	0.995431	-4.17399
PTCRA	0.307005	5.47435	1.7588	0.0973237	0.995431	-4.1749
KIF7	0.275124	5.27388	1.75871	0.0973387	0.995431	-4.17499
ATP7A	0.240423	2.57174	1.75788	0.097484	0.995431	-4.17587
PRL	0.304695	2.52551	1.75769	0.0975172	0.995431	-4.17607
TMEM247	0.271828	2.57602	1.75755	0.097542	0.995431	-4.17622
FAM171B	0.2575	2.37939	1.75744	0.0975606	0.995431	-4.17634
SIAE	0.258923	5.22464	1.75623	0.0977724	0.995431	-4.17762
LRTM2	0.298774	5.08278	1.75603	0.0978082	0.995431	-4.17784
CLDN34	0.294749	2.40693	1.75583	0.0978427	0.995431	-4.17804
RPL12P30	0.244015	3.42941	1.75492	0.0980028	0.995431	-4.17901
GLYATL3	0.261805	2.72054	1.75295	0.0983502	0.995431	-4.1811
SRMS	0.230191	5.24196	1.75281	0.0983746	0.995431	-4.18125
DUSP26	0.272528	4.03478	1.75267	0.0983999	0.995431	-4.1814
ZBTB45P1	0.259291	3.20487	1.75257	0.0984173	0.995431	-4.18151
ART2P	0.30884	2.675	1.75164	0.0985819	0.995431	-4.18249
RPL32P34	0.240665	4.33254	1.75076	0.0987365	0.995431	-4.18342
RPL6P5	0.248438	2.41432	1.7494	0.0989787	0.995431	-4.18487
CLDN15	0.297537	5.90941	1.74857	0.0991261	0.995431	-4.18575
JMJD1C-AS1	0.287693	4.42491	1.74841	0.0991546	0.995431	-4.18592
CDCA8	0.359266	3.61708	1.7478	0.0992629	0.995431	-4.18656
SLC7A5P1	0.240091	5.10847	1.74772	0.099277	0.995431	-4.18664
FAM214B	0.269877	4.82657	1.74636	0.0995179	0.995431	-4.18808
RASEF	0.290245	4.99423	1.74629	0.0995301	0.995431	-4.18815
FCRL2	0.32166	2.24863	1.74616	0.0995534	0.995431	-4.18829
ZNF625	0.236648	4.109	1.74603	0.0995774	0.995431	-4.18843
DDIT3	0.300026	4.14661	1.74595	0.0995909	0.995431	-4.18851
ADGRL3-AS1	0.339862	2.99284	1.74571	0.099634	0.995431	-4.18876
FABP1	0.749709	7.11845	1.74411	0.099921	0.995431	-4.19046
DICER1	0.302537	2.26317	1.74399	0.0999424	0.995431	-4.19059
STARD5	0.267002	5.74727	1.74372	0.0999898	0.995431	-4.19087
DOHH	0.345944	4.53356	1.7435	0.100029	0.995431	-4.1911
KRTAP15-1	0.257173	2.91171	1.74335	0.100056	0.995431	-4.19126
DRG2	0.322618	4.1047	1.74322	0.100079	0.995431	-4.1914
LRAT	0.266499	3.05937	1.7432	0.100083	0.995431	-4.19142
SNRPGP1	0.294645	3.8862	1.74194	0.100309	0.995431	-4.19275
GAPDHP29	0.229883	3.15886	1.74185	0.100324	0.995431	-4.19284
PRR32	0.245748	3.06303	1.74178	0.100337	0.995431	-4.19292
SUB1	0.324785	6.66751	1.74131	0.100421	0.995431	-4.19341
WDR61	0.313595	3.41623	1.74097	0.100484	0.995431	-4.19378
OR4S1	0.252166	3.94259	1.74044	0.100579	0.995431	-4.19434
ACSS1	0.225927	5.48441	1.74036	0.100593	0.995431	-4.19442
HSD17B7	0.276882	4.42921	1.74033	0.100599	0.995431	-4.19445
ZNF165	0.248661	2.85414	1.73945	0.100756	0.995431	-4.19538
NCLN	0.304971	4.70342	1.73906	0.100826	0.995431	-4.19579
RWDD2A	0.280232	3.65868	1.73825	0.100974	0.995431	-4.19665
RFPL1S	0.260349	2.52803	1.738	0.101019	0.995431	-4.19691
ODF3	0.26104	4.16214	1.7373	0.101144	0.995431	-4.19764
PRR7	0.229262	5.31275	1.73708	0.101185	0.995431	-4.19788
LRRC74A	0.237118	5.44748	1.73682	0.101232	0.995431	-4.19816
ASB7	0.248946	3.50092	1.73649	0.101292	0.995431	-4.19851
MYL1	0.290601	4.47807	1.73638	0.101311	0.995431	-4.19862
SDCBP2P1	0.260424	2.42216	1.73637	0.101312	0.995431	-4.19862
RPL17P44	0.30539	2.13591	1.73631	0.101324	0.995431	-4.19869
SRF	0.240409	3.99559	1.73629	0.101328	0.995431	-4.19872
LGALS4	0.26456	9.45215	1.7361	0.101362	0.995431	-4.19891
FAM135A	0.39025	4.83387	1.73538	0.101492	0.995431	-4.19967
SCYL2	0.263891	4.60996	1.73532	0.101504	0.995431	-4.19974
PRKCI	0.31768	3.46228	1.73524	0.101518	0.995431	-4.19982
MTND2P16	0.272871	2.37039	1.73461	0.101632	0.995431	-4.20048
NXNL1	0.241656	4.22378	1.7346	0.101634	0.995431	-4.2005
VNN3	0.315064	3.25854	1.73406	0.101731	0.995431	-4.20106
PLEKHA7	0.264103	4.23959	1.73372	0.101794	0.995431	-4.20142
CNTN4-AS2	0.322753	3.68508	1.73332	0.101866	0.995431	-4.20184
NOL3	0.322614	4.95739	1.73289	0.101944	0.995431	-4.20229
C8orf37	0.278519	2.01793	1.73282	0.101957	0.995431	-4.20237
NPPC	0.261011	4.52912	1.73192	0.102121	0.995431	-4.20332
IL22RA2	0.232926	2.64316	1.7309	0.102307	0.995431	-4.20439
DROSHA	0.265849	5.09316	1.73	0.102471	0.995431	-4.20533
IL1A	0.339174	2.4099	1.72969	0.102529	0.995431	-4.20567
MPV17L	0.274837	2.93719	1.72964	0.102537	0.995431	-4.20571
CHRNB1	0.296701	3.24941	1.72963	0.10254	0.995431	-4.20573
ATXN1L	0.258505	5.12082	1.72953	0.102557	0.995431	-4.20583
TAF1C	0.244073	5.5673	1.72935	0.102591	0.995431	-4.20602
ARV1	0.431461	3.46735	1.72928	0.102603	0.995431	-4.20609
PIGX	0.319716	3.25703	1.72924	0.10261	0.995431	-4.20613
MATN1-AS1	0.252006	3.67715	1.72904	0.102647	0.995431	-4.20635
OR2E1P	0.212175	2.75221	1.7279	0.102856	0.995431	-4.20755
MFAP1P1	0.235648	5.48365	1.72736	0.102955	0.995431	-4.20811
PSMG2	0.321763	4.80193	1.72735	0.102957	0.995431	-4.20813
MYADML	0.288939	5.75181	1.72695	0.103031	0.995431	-4.20854
CHERP	0.226551	4.54527	1.72646	0.103121	0.995431	-4.20906
EFCAB10	0.241875	2.4328	1.72641	0.103129	0.995431	-4.20911
INTU	0.249226	3.74912	1.72635	0.103141	0.995431	-4.20918
ZNF885P	0.242557	1.82985	1.72631	0.103149	0.995431	-4.20922
ZNF484	0.253352	4.42769	1.72626	0.103158	0.995431	-4.20927
PRKX-AS1	0.236502	3.59333	1.72565	0.103269	0.995431	-4.20991
PPIAP33	0.24679	3.78423	1.72545	0.103307	0.995431	-4.21012
SYAP1	0.265155	5.22248	1.72482	0.103422	0.995431	-4.21078
SDE2	0.23375	4.57984	1.72454	0.103473	0.995431	-4.21107
PTP4A1P2	0.24802	3.35214	1.72427	0.103523	0.995431	-4.21135
LECT2	0.287023	2.84234	1.72358	0.103652	0.995431	-4.21209
NYAP1	0.267437	6.13824	1.72336	0.103693	0.995431	-4.21232
CHODL-AS1	0.240849	2.27583	1.72216	0.103913	0.995431	-4.21357
RPL32P28	0.244901	2.37094	1.72208	0.103929	0.995431	-4.21366
PGAM1P2	0.232007	4.59086	1.72007	0.1043	0.995431	-4.21576
ORC3	0.33129	4.62664	1.72002	0.10431	0.995431	-4.21581
ERBB4	0.272245	4.93153	1.71901	0.104497	0.995431	-4.21687
MTND4P3	0.257972	1.64102	1.71875	0.104546	0.995431	-4.21714
PRSS12	0.293423	4.90397	1.71842	0.104607	0.995431	-4.21749
HECTD1	0.254664	6.84427	1.71817	0.104655	0.995431	-4.21776
ANK3	0.361873	5.34478	1.71755	0.104769	0.995431	-4.2184
RPL15P4	0.262462	3.32098	1.71715	0.104844	0.995431	-4.21882
ARNT	0.229821	6.99768	1.71683	0.104904	0.995431	-4.21916
RFPL4AP5	0.300899	2.54201	1.71662	0.104944	0.995431	-4.21938
RAD51	0.286647	3.31325	1.71603	0.105054	0.995431	-4.22
NCAPGP1	0.287189	1.83793	1.71543	0.105166	0.995431	-4.22063
SCT	0.298072	3.66045	1.71508	0.105231	0.995431	-4.22099
DMBX1	0.25083	3.12658	1.71347	0.105532	0.995431	-4.22267
KIF2B	0.212756	3.67593	1.7133	0.105565	0.995431	-4.22286
MTND4LP22	0.230329	2.1975	1.713	0.105621	0.995431	-4.22317
MORC2	0.222367	2.76888	1.71299	0.105622	0.995431	-4.22317
TSL	0.354468	3.25011	1.71241	0.105731	0.995431	-4.22378
TRAPPC13	0.268857	3.78501	1.71199	0.105811	0.995431	-4.22423
GRIA1	0.290745	3.30089	1.7119	0.105827	0.995431	-4.22431
SNORD36C	0.489753	3.28312	1.71175	0.105855	0.995431	-4.22447
RPL31P40	0.226372	4.38833	1.71163	0.105878	0.995431	-4.2246
FAM72D	0.288756	2.61985	1.71159	0.105885	0.995431	-4.22464
KRT18P58	0.258721	5.10359	1.71116	0.105966	0.995431	-4.22509
SCG3	0.23428	2.2209	1.71079	0.106036	0.995431	-4.22548
SLC25A37	0.304344	3.62022	1.71053	0.106085	0.995431	-4.22575
NOL8	0.31869	4.76513	1.71046	0.106099	0.995431	-4.22582
COIL	0.345708	3.41346	1.70736	0.106683	0.996442	-4.22906
LHPP	0.372687	3.99655	1.70704	0.106744	0.996442	-4.22939
MUC2	0.440036	9.13169	1.7068	0.106789	0.996442	-4.22964
RAD51AP2	0.276675	2.3279	1.70642	0.106863	0.996442	-4.23004
MCM9	0.306653	2.74276	1.7057	0.106999	0.996442	-4.23079
FABP5P13	0.288723	3.10036	1.70512	0.107109	0.996442	-4.2314
HAS1	0.244057	2.94951	1.70488	0.107154	0.996442	-4.23164
PON3	0.416865	5.20657	1.70432	0.10726	0.996442	-4.23223
EDN3	0.267065	4.79682	1.70354	0.10741	0.996442	-4.23305
LIPI	0.219891	2.1135	1.70332	0.107451	0.996442	-4.23327
TIAF1	0.246899	4.19639	1.70305	0.107503	0.996442	-4.23356
CALB2	0.419506	2.86678	1.70276	0.107558	0.996442	-4.23386
KDELC1P1	0.371631	3.34629	1.7014	0.107817	0.996813	-4.23527
KLF4	0.361385	4.65814	1.70137	0.107823	0.996813	-4.2353
CDAN1	0.241595	7.08013	1.70081	0.10793	0.996813	-4.23588
TDO2	0.385201	3.70378	1.70017	0.108053	0.996813	-4.23656
ZNF519P3	0.229992	2.12169	1.70015	0.108057	0.996813	-4.23658
CACNA2D2	0.237406	2.82512	1.69983	0.108118	0.996813	-4.23691
MTRNR2L6	0.261572	4.13104	1.69961	0.108159	0.996813	-4.23713
OTUB1	0.281365	3.90739	1.69918	0.108242	0.996813	-4.23759
DSCAML1	0.271888	3.85812	1.699	0.108276	0.996813	-4.23777
KNCN	0.211225	6.55478	1.69895	0.108286	0.996813	-4.23782
CASD1	0.456717	4.27714	1.69846	0.108381	0.996813	-4.23834
PITX3	0.304251	4.57439	1.69658	0.108742	0.996813	-4.24029
KIF3C	0.282935	5.2476	1.696	0.108854	0.996813	-4.24089
OR6J1	0.331435	2.98507	1.69579	0.108893	0.996813	-4.24111
KRT41P	0.367525	3.00844	1.69524	0.108999	0.996813	-4.24168
DUX4L16	0.322999	4.06306	1.69503	0.109039	0.996813	-4.24189
EXTL2	0.288661	2.21345	1.69461	0.109121	0.996813	-4.24233
DDX4	0.268124	2.18052	1.69399	0.109242	0.996813	-4.24298
MRPS36P5	0.217469	2.56584	1.69391	0.109256	0.996813	-4.24306
VIPAS39	0.234404	4.05029	1.69374	0.109289	0.996813	-4.24324
USP9YP16	0.252644	1.6854	1.69318	0.109397	0.996813	-4.24382
MARK2P14	0.268944	3.28629	1.69285	0.109461	0.996813	-4.24416
HSD17B7P2	0.376313	3.39196	1.69268	0.109494	0.996813	-4.24434
IYD	0.310892	3.95176	1.69247	0.109535	0.996813	-4.24456
SMG1P1	0.245734	5.89467	1.69146	0.109731	0.996813	-4.24561
OR5D15P	0.287163	2.60847	1.69131	0.109761	0.996813	-4.24576
BRPF1	0.278165	3.90439	1.69092	0.109836	0.996813	-4.24617
LSP1P3	0.345962	4.30698	1.69086	0.109848	0.996813	-4.24623
DPYD-AS2	0.378983	2.47649	1.69026	0.109963	0.996813	-4.24685
FAAH	0.253014	4.53879	1.6902	0.109976	0.996813	-4.24692
HCAR2	0.237688	3.55124	1.68999	0.110015	0.996813	-4.24713
REEP4	0.352556	4.01761	1.68993	0.110028	0.996813	-4.2472
HOXC-AS2	0.274426	4.72971	1.68916	0.110177	0.996813	-4.24799
CYP7A1	0.314499	2.09968	1.6889	0.110227	0.996813	-4.24826
CPS1-IT1	0.246454	2.17894	1.68866	0.110275	0.996813	-4.24851
LDLR	0.333982	4.79875	1.68849	0.110308	0.996813	-4.24868
TMEM51	0.256841	5.46454	1.68846	0.110313	0.996813	-4.24871
KRT18P7	0.290985	4.70379	1.68846	0.110315	0.996813	-4.24872
LAPTM4B	0.271479	3.09373	1.68844	0.110318	0.996813	-4.24874
CX3CR1	0.239439	3.31735	1.68806	0.110391	0.996813	-4.24913
XRRA1	0.224716	4.10575	1.68721	0.110558	0.996813	-4.25001
SLC25A5P5	0.344077	3.34883	1.68674	0.11065	0.996813	-4.2505
ARF1P1	0.240963	2.7582	1.68672	0.110654	0.996813	-4.25052
OR51A6P	0.238495	2.34563	1.68551	0.11089	0.996813	-4.25177
HPSE	0.239745	3.32782	1.68541	0.11091	0.996813	-4.25188
MTFR2	0.251047	1.87014	1.68463	0.111062	0.996813	-4.25268
TINAGL1	0.286478	4.50246	1.68436	0.111116	0.996813	-4.25297
MAPK11	0.321383	3.86837	1.68431	0.111126	0.996813	-4.25302
RPL7P48	0.240273	4.20318	1.68366	0.111253	0.996813	-4.25369
ZNF75BP	0.230316	3.43169	1.68353	0.111279	0.996813	-4.25383
NCKAP5	0.274348	3.15982	1.68277	0.111427	0.996813	-4.25461
CLCA4	0.40753	2.19975	1.68255	0.11147	0.996813	-4.25483
ZBED8	0.297483	1.95223	1.68147	0.111683	0.996813	-4.25595
KRTAP5-3	0.210793	6.3822	1.68133	0.111712	0.996813	-4.2561
COX5BP2	0.242918	3.09427	1.68081	0.111813	0.996813	-4.25663
SOCS5P2	0.268239	2.04712	1.68067	0.111841	0.996813	-4.25678
AIMP1P1	0.282176	2.47894	1.67983	0.112007	0.996813	-4.25765
ENOX1-AS2	0.375961	2.96456	1.67895	0.112181	0.996813	-4.25856
ANKMY1	0.251359	5.00405	1.67803	0.112363	0.996813	-4.25951
SH3RF3-AS1	0.252626	3.96574	1.67795	0.112379	0.996813	-4.25959
CYCSP25	0.293962	2.5699	1.67718	0.112531	0.996813	-4.26039
KIAA0100	0.333253	3.93583	1.67613	0.112739	0.996813	-4.26147
ZBTB40-IT1	0.292533	3.82385	1.67611	0.112744	0.996813	-4.2615
NDUFAF4P1	0.223997	2.42457	1.67568	0.112828	0.996813	-4.26193
TFDP2	0.240096	6.13506	1.6754	0.112885	0.996813	-4.26223
MFSD9	0.252007	5.26298	1.67535	0.112895	0.996813	-4.26228
MTCO1P23	0.239039	2.16536	1.67526	0.112913	0.996813	-4.26237
ERMN	0.246295	2.34497	1.6747	0.113023	0.996813	-4.26294
FUT3	0.263791	4.67418	1.67468	0.113029	0.996813	-4.26297
STXBP1	0.286888	5.41653	1.67451	0.113061	0.996813	-4.26314
RPL23AP92	0.315836	3.43198	1.67401	0.113162	0.996813	-4.26366
CDY4P	0.222674	2.26783	1.67375	0.113213	0.996813	-4.26393
FAM181B	0.250697	5.11419	1.67326	0.113311	0.996813	-4.26443
LYZL1	0.302854	3.3472	1.67273	0.113416	0.996813	-4.26498
ST8SIA5	0.23091	4.22449	1.67265	0.113432	0.996813	-4.26506
SCIN	0.357825	3.50911	1.67225	0.113512	0.996813	-4.26547
OR6S1	0.289321	2.69072	1.67224	0.113513	0.996813	-4.26548
TRAV21	0.314326	2.87395	1.6717	0.113621	0.996813	-4.26604
FAM220BP	0.278779	4.18085	1.67135	0.113693	0.996813	-4.2664
IGHV7-27	0.26773	3.30887	1.67132	0.113698	0.996813	-4.26643
DYNLRB2	0.21517	2.14224	1.67063	0.113836	0.996813	-4.26714
SYF2P1	0.286129	2.19099	1.6705	0.113862	0.996813	-4.26727
DMP1	0.231848	2.40744	1.67028	0.113906	0.996813	-4.2675
ABHD17C	0.305722	5.00552	1.67021	0.11392	0.996813	-4.26757
GPR39	0.286527	2.49216	1.66987	0.113989	0.996813	-4.26793
KRT8P21	0.323721	4.17591	1.66946	0.11407	0.996813	-4.26834
KCTD16	0.236494	2.03263	1.66909	0.114144	0.996813	-4.26872
WDR88	0.239415	3.00278	1.66891	0.114182	0.996813	-4.26892
NIFKP2	0.261884	2.36748	1.66864	0.114234	0.996813	-4.26919
IPO7P2	0.232928	2.26044	1.66854	0.114256	0.996813	-4.2693
C22orf42	0.226735	4.07517	1.66734	0.114496	0.996813	-4.27052
PPP1R14D	0.251512	4.09992	1.66725	0.114515	0.996813	-4.27062
AK3P4	0.220347	2.18392	1.66693	0.11458	0.996813	-4.27095
ANAPC11	0.238842	4.67369	1.66677	0.114611	0.996813	-4.27111
VEZF1	0.213236	6.09041	1.6662	0.114725	0.996813	-4.2717
PYM1	0.27156	4.73874	1.66582	0.114803	0.996813	-4.27209
AMER2	0.309826	3.60454	1.66577	0.114812	0.996813	-4.27214
RPS27P27	0.264297	3.73199	1.66538	0.114891	0.996813	-4.27254
THAP2	0.2491	2.20723	1.66518	0.114933	0.996813	-4.27275
ME2P1	0.227789	3.58227	1.66517	0.114935	0.996813	-4.27276
OR2C3	0.260085	3.06137	1.66492	0.114984	0.996813	-4.27301
SLCO4C1	0.280269	2.0318	1.66482	0.115005	0.996813	-4.27312
SNORD77	0.203777	1.946	1.66476	0.115018	0.996813	-4.27319
SMG7	0.322208	3.13553	1.66413	0.115144	0.996813	-4.27383
MTND2P38	0.250355	1.75572	1.66342	0.115287	0.996813	-4.27456
BPIFB4	0.24545	2.22549	1.66323	0.115326	0.996813	-4.27475
ABCG4	0.249899	3.29641	1.66309	0.115355	0.996813	-4.2749
RBP2	0.235572	4.01589	1.66221	0.115533	0.996813	-4.2758
PPP1R42	0.275646	2.02873	1.66108	0.115763	0.996813	-4.27696
ATP1B3P1	0.264564	2.54356	1.66073	0.115834	0.996813	-4.27732
FAM53A	0.209709	4.71732	1.66037	0.115907	0.996813	-4.27769
MPP4	0.219864	4.02384	1.66015	0.115952	0.996813	-4.27792
LRFN3	0.302284	4.20391	1.65906	0.116174	0.996813	-4.27904
TRIM60P14	0.210537	1.7499	1.65875	0.116237	0.996813	-4.27935
SCML4	0.259597	3.43825	1.65849	0.116289	0.996813	-4.27962
YBX1P5	0.299071	4.53175	1.65769	0.116452	0.996813	-4.28044
RPL7P41	0.289961	2.46978	1.65708	0.116577	0.996813	-4.28106
TMPOP1	0.376222	2.05967	1.65636	0.116724	0.996813	-4.2818
FAM106DP	0.312838	2.8527	1.65635	0.116727	0.996813	-4.28181
DMRTA2	0.234684	4.45807	1.65605	0.116788	0.996813	-4.28212
HNRNPCL4	0.239019	3.28229	1.65488	0.117028	0.996813	-4.28332
RPS26P45	0.288186	3.13334	1.65485	0.117034	0.996813	-4.28335
RPS13P2	0.357462	5.39788	1.65478	0.117048	0.996813	-4.28342
HCG11	0.288441	2.9521	1.65415	0.117177	0.996813	-4.28406
BECN1P2	0.295529	2.41756	1.65382	0.117245	0.996813	-4.2844
STK31	0.26173	2.54985	1.65376	0.117258	0.996813	-4.28447
CA3	0.237404	3.9154	1.65328	0.117356	0.996813	-4.28496
SCGB2B2	0.319378	3.52627	1.65314	0.117386	0.996813	-4.2851
ANGPTL1	0.232632	2.38962	1.65312	0.117388	0.996813	-4.28511
ST6GALNAC3	0.271528	5.10754	1.65297	0.117421	0.996813	-4.28528
CIR1	0.320494	4.84878	1.65231	0.117555	0.996813	-4.28594
MGAM2	0.481194	4.26484	1.65168	0.117686	0.996813	-4.28659
KIF11	0.26193	3.35602	1.65078	0.11787	0.996813	-4.28751
TNFRSF10B	0.352396	3.23723	1.65059	0.117911	0.996813	-4.28771
SLC25A3P2	0.237721	4.6532	1.65051	0.117927	0.996813	-4.28779
RPSAP25	0.307084	3.2796	1.6505	0.117929	0.996813	-4.2878
LZTS1	0.222519	3.85674	1.65013	0.118006	0.996813	-4.28818
OR11H4	0.222164	1.59995	1.65001	0.11803	0.996813	-4.2883
CCDC122	0.276118	3.71292	1.64981	0.118072	0.996813	-4.28851
PRKCE	0.232876	7.01521	1.64949	0.118137	0.996813	-4.28883
RIN3	0.255234	3.06683	1.6494	0.118157	0.996813	-4.28893
CACNB2	0.246741	3.08616	1.64921	0.118195	0.996813	-4.28911
ZNF669	0.214247	4.36302	1.64918	0.118203	0.996813	-4.28915
AP3S1	0.363995	4.80324	1.649	0.118239	0.996813	-4.28933
FMR1NB	0.245216	2.12565	1.64887	0.118266	0.996813	-4.28947
ACOT2	0.280415	4.75069	1.64882	0.118276	0.996813	-4.28952
RXRG	0.25342	2.48246	1.64879	0.118283	0.996813	-4.28955
SLCO4A1-AS1	0.350063	4.95402	1.64851	0.11834	0.996813	-4.28983
DAND5	0.224742	3.78633	1.64849	0.118344	0.996813	-4.28985
KRT18P62	0.258191	3.36684	1.64833	0.118378	0.996813	-4.29002
UPP2	0.263059	2.06632	1.64822	0.118401	0.996813	-4.29013
RPS6P21	0.216558	2.92606	1.64712	0.118627	0.996813	-4.29125
BCL2L14	0.334091	5.15013	1.64683	0.118688	0.996813	-4.29155
MTND6P33	0.219141	3.68532	1.646	0.11886	0.996813	-4.29239
OXCT1	0.246481	4.38377	1.64584	0.118894	0.996813	-4.29256
TRIM60P13	0.245803	2.01683	1.64575	0.118913	0.996813	-4.29265
TBCK	0.253773	2.77441	1.64429	0.119216	0.996813	-4.29413
MBNL3	0.222892	3.64023	1.64393	0.119293	0.996813	-4.29451
ZBTB12	0.249984	3.10764	1.6436	0.119359	0.996813	-4.29484
DHRS7	0.231492	3.32213	1.64332	0.119418	0.996813	-4.29513
ZNF687	0.32428	4.34258	1.64322	0.11944	0.996813	-4.29523
RPL36AP51	0.259479	5.10982	1.64293	0.1195	0.996813	-4.29552
IFNL2	0.306756	3.7471	1.64287	0.119512	0.996813	-4.29559
PPL	0.251461	4.40334	1.64279	0.119529	0.996813	-4.29567
MFSD2A	0.223103	5.51489	1.64262	0.119564	0.996813	-4.29584
CPB1	0.249782	1.84445	1.64252	0.119586	0.996813	-4.29595
JAK2	0.285334	5.02079	1.64236	0.119619	0.996813	-4.2961
OR5H4P	0.269962	1.91499	1.64231	0.119629	0.996813	-4.29616
TET2-AS1	0.242398	2.13727	1.64179	0.119739	0.996813	-4.29669
OR5AL1	0.238955	2.02929	1.64175	0.119748	0.996813	-4.29673
GALNT8	0.249899	4.38149	1.64137	0.119827	0.996813	-4.29712
OR2G2	0.282357	3.10138	1.64107	0.11989	0.996813	-4.29742
PXT1	0.256278	3.53472	1.64081	0.119943	0.996813	-4.29768
NACAD	0.327737	3.71501	1.6405	0.120008	0.996813	-4.298
TNFSF14	0.250759	4.98655	1.64019	0.120074	0.996813	-4.29832
DEFB126	0.42124	2.11536	1.63994	0.120126	0.996813	-4.29857
VGLL1	0.253625	2.61266	1.63869	0.120388	0.996813	-4.29984
SMIM17	0.215061	6.35666	1.63818	0.120494	0.996813	-4.30036
AFG3L2P1	0.225305	2.63537	1.638	0.120532	0.996813	-4.30054
ARHGEF28	0.275974	5.18151	1.63793	0.120549	0.996813	-4.30062
RIPK3	0.241909	2.82438	1.63713	0.120715	0.996813	-4.30143
TBX21	0.236016	3.48297	1.63646	0.120857	0.996813	-4.30211
RPL12P1	0.258828	6.72328	1.63645	0.120859	0.996813	-4.30212
TMPRSS9	0.256398	3.38977	1.63629	0.120894	0.996813	-4.30229
SPRY3	0.278168	2.68701	1.63626	0.1209	0.996813	-4.30232
GRIN2D	0.216284	2.79179	1.63531	0.121099	0.996813	-4.30328
LURAP1L-AS1	0.283956	2.56763	1.63527	0.121107	0.996813	-4.30332
ST13P12	0.333183	2.85162	1.63501	0.121164	0.996813	-4.30359
HTR5BP	0.282147	3.68609	1.63443	0.121286	0.996813	-4.30418
RER1	0.247381	5.62455	1.63427	0.12132	0.996813	-4.30434
NETO1	0.376147	2.78788	1.63368	0.121445	0.996813	-4.30494
TRHDE-AS1	0.217432	3.10831	1.63327	0.121532	0.996813	-4.30536
BUD13P1	0.253913	3.39653	1.63286	0.121618	0.996813	-4.30577
GPS2P1	0.228747	3.60224	1.63208	0.121783	0.996813	-4.30656
OC90	0.211683	4.35709	1.632	0.121801	0.996813	-4.30665
SYTL5	0.244752	2.21295	1.63181	0.121841	0.996813	-4.30684
UNC119B	0.233842	3.11358	1.6318	0.121843	0.996813	-4.30684
NMUR1	0.291169	4.09279	1.63107	0.121999	0.996813	-4.30759
HSPA5	0.269455	6.99038	1.63083	0.12205	0.996813	-4.30784
COLGALT2	0.276141	2.71245	1.63071	0.122075	0.996813	-4.30796
NUDT22	0.21541	6.12909	1.63046	0.122127	0.996813	-4.3082
TRIO	0.26513	4.40511	1.62999	0.122228	0.996813	-4.30869
PUSL1	0.253307	4.00971	1.62977	0.122274	0.996813	-4.3089
IER3	0.217884	5.48904	1.62785	0.122685	0.996813	-4.31086
OR52K2	0.215344	6.00431	1.62675	0.122918	0.996813	-4.31196
RPS2P25	0.267103	4.65649	1.62611	0.123056	0.996813	-4.31262
SIX2	0.249518	4.3628	1.62585	0.123111	0.996813	-4.31288
AHCTF1P1	0.246493	5.26284	1.6252	0.12325	0.996813	-4.31353
ALDOB	0.377643	3.41861	1.62514	0.123264	0.996813	-4.3136
IL21	0.305418	3.64576	1.625	0.123294	0.996813	-4.31374
KBTBD4	0.227376	6.48437	1.6248	0.123336	0.996813	-4.31394
PCDH20	0.259553	4.38335	1.62466	0.123366	0.996813	-4.31408
PCBP2P1	0.226474	4.31919	1.62429	0.123447	0.996813	-4.31446
UBL4A	0.225085	5.20728	1.62395	0.123518	0.996813	-4.3148
RPS2P46	0.234021	9.13556	1.62378	0.123556	0.996813	-4.31498
KDM5D	0.274132	3.44255	1.62296	0.123732	0.996813	-4.31581
PRIMA1	0.248646	3.30847	1.62294	0.123736	0.996813	-4.31582
GPR158	0.254678	2.69216	1.62228	0.123878	0.996813	-4.31649
NDUFB4P7	0.251042	3.78076	1.62221	0.123893	0.996813	-4.31656
HUS1B	0.260173	2.50421	1.62172	0.123998	0.996813	-4.31706
OR6C1	0.256411	2.07491	1.62127	0.124096	0.996813	-4.31752
GRXCR2	0.268292	2.7639	1.62107	0.124139	0.996813	-4.31772
VN1R76P	0.219864	1.73516	1.62107	0.124139	0.996813	-4.31772
RPRML	0.235394	4.94452	1.62093	0.124168	0.996813	-4.31785
OR6X1	0.250631	3.86489	1.61843	0.12471	0.996813	-4.32039
OR7G15P	0.215726	2.33798	1.61842	0.124711	0.996813	-4.32039
RPS10P27	0.212081	3.96446	1.61834	0.124729	0.996813	-4.32047
DUT	0.273468	4.69892	1.61827	0.124743	0.996813	-4.32054
ATRNL1	0.236675	1.85994	1.61756	0.124897	0.996813	-4.32126
RPL5P11	0.213701	3.47397	1.61735	0.124942	0.996813	-4.32147
RPS7P11	0.30599	6.80564	1.61699	0.125021	0.996813	-4.32183
SH3GL2	0.240923	2.98492	1.61697	0.125026	0.996813	-4.32186
FAM138A	0.23222	4.26766	1.61679	0.125064	0.996813	-4.32204
IGHV1-67	0.283522	3.55787	1.61663	0.125099	0.996813	-4.32219
OR11G2	0.220643	1.86628	1.61508	0.125435	0.996813	-4.32376
FSD1L	0.291372	2.49095	1.615	0.125454	0.996813	-4.32385
ABCB5	0.464833	3.65423	1.61396	0.12568	0.996813	-4.32489
OXSM	0.226436	3.27704	1.61384	0.125707	0.996813	-4.32501
GIPC2	0.346095	7.73341	1.61279	0.125936	0.996813	-4.32607
KLK9	0.278474	3.91997	1.61236	0.126028	0.996813	-4.3265
RBBP4P5	0.281167	3.92315	1.61159	0.126197	0.996813	-4.32728
TMA7	0.31122	7.34929	1.61144	0.126231	0.996813	-4.32743
USP17L17	0.307197	2.88327	1.61102	0.126322	0.996813	-4.32785
REG1A	0.436641	4.83481	1.61097	0.126334	0.996813	-4.3279
TECTB	0.28246	2.13888	1.61085	0.126359	0.996813	-4.32802
ZKSCAN2	0.267912	3.39489	1.61061	0.126413	0.996813	-4.32827
SMIM8	0.266367	2.95142	1.61005	0.126534	0.996813	-4.32882
LAMTOR4	0.230465	4.21174	1.60965	0.126623	0.996813	-4.32924
YBEY	0.265164	5.08822	1.60952	0.126651	0.996813	-4.32936
OR2A3P	0.21867	3.39913	1.60937	0.126684	0.996813	-4.32951
MT-TQ	0.200913	10.881	1.60921	0.126719	0.996813	-4.32967
SPC25	0.207134	3.86504	1.6088	0.126808	0.996813	-4.33008
TIMM13	0.270428	4.87508	1.60841	0.126895	0.996813	-4.33048
RPSAP46	0.212649	5.48814	1.60782	0.127024	0.996813	-4.33107
SS18L1	0.316928	3.53685	1.6077	0.12705	0.996813	-4.33119
GAPDHP61	0.234814	5.50946	1.60752	0.12709	0.996813	-4.33137
OR6K3	0.241075	1.82875	1.60739	0.12712	0.996813	-4.33151
SNORD99	0.259607	4.02236	1.607	0.127205	0.996813	-4.3319
USP45	0.24338	2.99646	1.60689	0.127228	0.996813	-4.332
OR4P1P	0.246563	2.12604	1.60596	0.127434	0.996813	-4.33294
RAB29	0.205481	3.91561	1.60587	0.127453	0.996813	-4.33303
HRAT5	0.228011	4.08313	1.60585	0.127458	0.996813	-4.33305
SOD3	0.267041	2.79159	1.60533	0.127573	0.996813	-4.33358
UBTFL9	0.252219	1.83583	1.6051	0.127625	0.996813	-4.33381
MUSTN1	0.22084	4.54077	1.60501	0.127644	0.996813	-4.3339
ACBD7	0.246971	2.13307	1.6049	0.127668	0.996813	-4.334
ZDHHC3	0.266795	5.93078	1.60431	0.127798	0.996813	-4.3346
NANOS1	0.227415	4.83347	1.60371	0.127931	0.996813	-4.3352
DYNLL1P4	0.214656	4.45974	1.60311	0.128063	0.996813	-4.3358
PTGDR2	0.232356	3.69149	1.6029	0.12811	0.996813	-4.33601
LHX1	0.220954	3.14666	1.60255	0.128187	0.996813	-4.33636
EGR4	0.308224	3.94339	1.60252	0.128194	0.996813	-4.33639
ABHD13	0.280427	5.18808	1.60248	0.128204	0.996813	-4.33644
CNOT4P1	0.220582	2.83859	1.60175	0.128366	0.996813	-4.33717
HTR2A	0.293309	3.90949	1.60148	0.128425	0.996813	-4.33744
GYPB	0.228354	1.60438	1.60056	0.128631	0.996813	-4.33837
DKKL1P1	0.307988	3.51143	1.60033	0.128681	0.996813	-4.33859
KBTBD7	0.256685	3.16725	1.59995	0.128766	0.996813	-4.33898
OOSP1P1	0.252349	1.63562	1.59979	0.128802	0.996813	-4.33914
TECRP1	0.22923	6.35961	1.59974	0.128812	0.996813	-4.33918
CASC2	0.250716	2.1804	1.59959	0.128846	0.996813	-4.33933
MTCO2P3	0.212811	1.91435	1.59949	0.128868	0.996813	-4.33943
GID8	0.216966	5.39224	1.59911	0.128952	0.996813	-4.33981
DSCR10	0.212626	5.04248	1.59907	0.12896	0.996813	-4.33985
KRT6C	0.246545	4.34467	1.59867	0.12905	0.996813	-4.34025
PARP1P1	0.294948	2.33873	1.59837	0.129116	0.996813	-4.34055
RNGTT	0.235966	3.97986	1.59673	0.129483	0.996813	-4.3422
TULP1	0.237482	3.33693	1.59617	0.129609	0.996813	-4.34276
ZNF180	0.281066	4.4778	1.59615	0.129613	0.996813	-4.34278
FAM66A	0.209972	1.72216	1.59609	0.129626	0.996813	-4.34284
C11orf1	0.257477	5.35109	1.59607	0.129631	0.996813	-4.34286
MED14OS	0.291244	2.51651	1.59572	0.129709	0.996813	-4.34321
OR10G5P	0.234874	2.72521	1.59451	0.12998	0.996813	-4.34442
ERVFRD-1	0.229005	2.39748	1.59435	0.130016	0.996813	-4.34458
PLEKHM2	0.348428	4.66999	1.59422	0.130045	0.996813	-4.34471
NCCRP1	0.25743	4.29448	1.59364	0.130176	0.996813	-4.34529
TATDN2P3	0.217816	2.83323	1.59335	0.13024	0.996813	-4.34558
LPIN2	0.229502	5.6299	1.59248	0.130436	0.996813	-4.34645
NRN1L	0.232078	5.29743	1.59171	0.130609	0.996813	-4.34721
CRLF3	0.289229	3.0298	1.59144	0.130671	0.996813	-4.34749
C19orf81	0.252383	3.42629	1.5914	0.130679	0.996813	-4.34753
RCCD1	0.228344	6.36911	1.59134	0.130694	0.996813	-4.34759
NOX5	0.276841	3.04421	1.59133	0.130696	0.996813	-4.3476
DACH2	0.209396	2.87398	1.59107	0.130753	0.996813	-4.34786
FAU	0.205133	5.32587	1.59027	0.130934	0.996813	-4.34866
PCDH8P1	0.332697	2.01439	1.59015	0.130962	0.996813	-4.34878
SPTBN5	0.234036	5.22271	1.5901	0.130972	0.996813	-4.34882
ZNF324	0.313687	4.04811	1.59002	0.130991	0.996813	-4.34891
OR51A9P	0.212214	4.07299	1.58931	0.131151	0.996813	-4.34962
ALKBH3	0.321177	3.8848	1.58929	0.131155	0.996813	-4.34963
SPINT3	0.223551	1.87783	1.58867	0.131296	0.996813	-4.35026
IL1B	0.368976	4.21878	1.58829	0.131381	0.996813	-4.35063
ANKRD53	0.306025	3.31244	1.58768	0.131519	0.996813	-4.35124
GPR33	0.252398	1.99813	1.58742	0.131579	0.996813	-4.3515
OR7E29P	0.301955	3.40916	1.58728	0.131609	0.996813	-4.35164
FAHD1	0.206998	3.86341	1.58712	0.131647	0.996813	-4.3518
WASF1	0.252481	2.17299	1.58679	0.131722	0.996813	-4.35213
OR4G3P	0.27822	2.30744	1.58643	0.131803	0.996813	-4.35248
CARD17	0.227589	2.04896	1.5863	0.131834	0.996813	-4.35262
CTR9	0.258449	5.19683	1.58622	0.131851	0.996813	-4.3527
MAP3K5	0.237629	3.46842	1.58575	0.131957	0.996813	-4.35316
SNORD115-8	0.223945	1.76516	1.58569	0.131972	0.996813	-4.35323
CDKN2AIPNL	0.208942	6.07173	1.58473	0.132189	0.996813	-4.35418
TMEM171	0.213091	4.50959	1.58451	0.13224	0.996813	-4.3544
GPAT3	0.277805	2.8091	1.58445	0.132252	0.996813	-4.35446
PDZD9	0.2424	2.38392	1.58339	0.132494	0.996813	-4.35551
OR6F1	0.211786	3.29603	1.58338	0.132497	0.996813	-4.35552
STAMBPL1	0.378756	4.97596	1.58259	0.132677	0.996813	-4.35631
CDK12	0.251909	4.49185	1.58231	0.132741	0.996813	-4.35659
NPM1P12	0.222992	4.34615	1.58166	0.132889	0.996813	-4.35724
SEH1L	0.260289	3.43332	1.5816	0.132902	0.996813	-4.35729
C16orf46	0.214684	3.50984	1.58134	0.132962	0.996813	-4.35755
USB1	0.224169	5.01176	1.581	0.13304	0.996813	-4.35789
RPS7P8	0.247554	5.02392	1.58092	0.133059	0.996813	-4.35797
RBM48P1	0.251229	2.35668	1.58075	0.133097	0.996813	-4.35814
ANKRD31	0.27597	2.63253	1.58064	0.133122	0.996813	-4.35825
KCNIP4-IT1	0.231128	1.90592	1.58038	0.133182	0.996813	-4.35851
RPL29P22	0.233016	2.9745	1.58021	0.133221	0.996813	-4.35868
GSTO2	0.27998	5.58349	1.57981	0.133314	0.996813	-4.35908
FAM167A	0.261391	3.40538	1.57935	0.133419	0.996813	-4.35954
SEC61A2	0.267369	3.11712	1.57924	0.133444	0.996813	-4.35965
ARNTL2	0.358042	3.82858	1.57916	0.133462	0.996813	-4.35973
COX11P1	0.273435	4.9978	1.57891	0.133519	0.996813	-4.35997
ZNF280A	0.336352	2.74418	1.57884	0.133536	0.996813	-4.36004
RPL4P5	0.246368	5.3692	1.57873	0.13356	0.996813	-4.36015
ZCCHC8	0.29198	4.63016	1.57769	0.133799	0.996813	-4.36118
TAAR1	0.215385	2.04767	1.57761	0.133819	0.996813	-4.36127
CHML	0.23721	2.2779	1.57739	0.133868	0.996813	-4.36148
TMEM108-AS1	0.205644	2.13012	1.57735	0.133877	0.996813	-4.36152
FEM1AP3	0.223007	2.68784	1.5772	0.133912	0.996813	-4.36167
TRIM51CP	0.233495	3.19804	1.577	0.133957	0.996813	-4.36187
CLRN3	0.277809	6.25116	1.57631	0.134118	0.996813	-4.36256
IRF7	0.240267	3.91066	1.57596	0.134197	0.996813	-4.3629
KRT32	0.230094	3.26553	1.57578	0.13424	0.996813	-4.36308
ABHD18	0.279717	3.20941	1.57567	0.134264	0.996813	-4.36319
KRT71	0.21348	5.5106	1.57489	0.134443	0.996813	-4.36396
EIF4E2P2	0.214649	2.93651	1.57482	0.134459	0.996813	-4.36403
ACSM6	0.259233	3.308	1.57475	0.134476	0.996813	-4.3641
AK5	0.235572	2.23685	1.57466	0.134497	0.996813	-4.36419
SPPL2B	0.255287	6.30575	1.57446	0.134544	0.996813	-4.36439
LPAR5	0.241654	4.98859	1.574	0.134649	0.996813	-4.36484
PIGPP4	0.200441	2.40603	1.57372	0.134714	0.996813	-4.36512
CCNH	0.250385	5.53804	1.57251	0.134994	0.996813	-4.36632
BSDC1	0.232739	3.92559	1.57248	0.135002	0.996813	-4.36636
GPR151	0.296842	3.12839	1.57112	0.135318	0.996813	-4.36771
RPS8	0.242162	10.6315	1.56991	0.135597	0.996813	-4.3689
FOXP3	0.273536	4.9625	1.5698	0.135623	0.996813	-4.36901
CFAP69	0.24237	3.03214	1.56977	0.13563	0.996813	-4.36904
ATP2C2	0.250512	5.48655	1.56976	0.135632	0.996813	-4.36905
SNX18P24	0.236339	2.07875	1.56967	0.135654	0.996813	-4.36914
OR7K1P	0.284897	2.55984	1.56932	0.135734	0.996813	-4.36948
SIGLEC26P	0.238644	3.31796	1.56879	0.135858	0.996813	-4.37001
NEK11	0.23575	1.96035	1.56834	0.135964	0.996813	-4.37046
UGT1A2P	0.226348	4.63537	1.5678	0.136089	0.996813	-4.37099
VN1R79P	0.238413	2.85061	1.56756	0.136144	0.996813	-4.37122
TSPAN12	0.257938	5.26507	1.56729	0.136207	0.996813	-4.37149
PRELID3BP7	0.233367	3.87403	1.5669	0.1363	0.996813	-4.37188
DNAJB3	0.272272	2.74627	1.56659	0.13637	0.996813	-4.37218
SH3BGRL2	0.27297	5.70481	1.5665	0.136391	0.996813	-4.37227
CSH1	0.209382	3.33531	1.5664	0.136417	0.996813	-4.37238
TEX15	0.194095	2.10234	1.56533	0.136665	0.996813	-4.37343
BRWD1P3	0.221206	3.4574	1.56483	0.136783	0.996813	-4.37392
SALL4P2	0.227563	2.62446	1.5645	0.13686	0.996813	-4.37425
KIF15	0.306053	2.83646	1.5643	0.136906	0.996813	-4.37444
CMIP	0.410325	2.64007	1.56422	0.136926	0.996813	-4.37453
PIRT	0.24904	2.67995	1.56357	0.137077	0.996813	-4.37516
POLR3G	0.435108	4.74907	1.56302	0.137208	0.996813	-4.37571
USP2	0.224414	2.61798	1.56291	0.137232	0.996813	-4.37582
MTHFD2P3	0.206914	5.36298	1.56259	0.137308	0.996813	-4.37614
SH3GL3	0.218461	1.86002	1.56107	0.137666	0.996813	-4.37764
CYP2G2P	0.233902	2.64024	1.56087	0.137713	0.996813	-4.37784
IFT74	0.233653	2.44688	1.56072	0.137748	0.996813	-4.37798
HNRNPA1P8	0.212416	5.98657	1.5603	0.137846	0.996813	-4.37839
PLEKHG2	0.284221	3.56094	1.55983	0.137959	0.996813	-4.37886
ASMT	0.224466	3.62821	1.55975	0.137976	0.996813	-4.37893
HAUS6P3	0.239054	3.39676	1.55893	0.138169	0.996813	-4.37974
HEATR4	0.226573	5.61713	1.55872	0.138219	0.996813	-4.37995
TSEN15P1	0.249641	4.72949	1.5585	0.138273	0.996813	-4.38017
RAC1P1	0.227396	2.97607	1.5584	0.138295	0.996813	-4.38027
STXBP6	0.230715	4.67295	1.55822	0.138339	0.996813	-4.38045
OR2AP1	0.307522	2.36047	1.5579	0.138415	0.996813	-4.38077
ZNF658B	0.245575	2.51764	1.55766	0.138471	0.996813	-4.381
EFHD2	0.257662	5.45209	1.55736	0.138541	0.996813	-4.38129
CASP8AP2	0.27638	3.58702	1.55686	0.138659	0.996813	-4.38178
BDH1	0.251085	3.33056	1.5564	0.138769	0.996813	-4.38224
C2orf15	0.326234	2.94818	1.55616	0.138826	0.996813	-4.38248
RUVBL1	0.296428	4.21739	1.55606	0.13885	0.996813	-4.38258
TBX22	0.314556	2.05466	1.55602	0.138858	0.996813	-4.38261
DUSP23	0.291565	5.32333	1.55534	0.13902	0.996813	-4.38328
TCEANC	0.251566	3.73095	1.55512	0.139071	0.996813	-4.38349
CENPW	0.219752	3.83105	1.55481	0.139147	0.996813	-4.3838
PUM1	0.256475	6.14398	1.55453	0.139214	0.996813	-4.38408
IL17REL	0.220957	5.26115	1.55429	0.13927	0.996813	-4.38431
OR4R2P	0.222719	2.0715	1.55424	0.139282	0.996813	-4.38437
UBE3B	0.240257	2.68462	1.55322	0.139525	0.996813	-4.38537
SRD5A3	0.349154	5.1383	1.55247	0.139704	0.996813	-4.38611
APOH	0.266293	2.62138	1.55215	0.139779	0.996813	-4.38642
SLC25A3P1	0.295256	2.74271	1.55208	0.139796	0.996813	-4.38649
CBX8	0.235972	5.43942	1.55199	0.139817	0.996813	-4.38657
PFKFB1	0.24719	2.91597	1.55196	0.139825	0.996813	-4.38661
RPL23AP87	0.230355	5.21167	1.55165	0.139898	0.996813	-4.38691
STIP1	0.266307	4.75503	1.55136	0.139967	0.996813	-4.38719
STRN	0.248577	3.97919	1.55116	0.140016	0.996813	-4.38739
PPATP1	0.228796	2.99692	1.55037	0.140205	0.996813	-4.38817
GLYAT	0.276988	2.18289	1.55028	0.140225	0.996813	-4.38825
PRKAA1	0.226383	4.15876	1.55025	0.140234	0.996813	-4.38829
TENM1	0.233267	1.96378	1.54997	0.1403	0.996813	-4.38856
SLC22A18AS	0.24316	5.41262	1.54987	0.140324	0.996813	-4.38866
REXO1L5P	0.221336	5.24338	1.54939	0.140438	0.996813	-4.38913
CAPN12	0.234764	3.92479	1.54936	0.140445	0.996813	-4.38915
DRP2	0.248225	2.78859	1.54901	0.140529	0.996813	-4.3895
MYOZ3	0.230365	3.02507	1.54853	0.140644	0.996813	-4.38997
UGT3A1	0.239229	3.17757	1.54792	0.140792	0.996813	-4.39057
ODF4	0.2249	3.33707	1.54706	0.140998	0.996813	-4.39142
DUX4	0.229152	2.8374	1.54704	0.141002	0.996813	-4.39143
OR52L1	0.315778	2.97123	1.5469	0.141035	0.996813	-4.39157
CLEC10A	0.222741	4.05684	1.54672	0.141079	0.996813	-4.39175
EIF1AX-AS1	0.246373	3.70429	1.54594	0.141267	0.996813	-4.39251
HSFY1P1	0.193369	1.65539	1.54557	0.141356	0.996813	-4.39288
LRTM1	0.261178	2.41583	1.54388	0.141763	0.996813	-4.39453
HSPD1P21	0.260508	1.87619	1.54329	0.141905	0.996813	-4.39511
SERBP1P6	0.214525	3.82915	1.54292	0.141995	0.996813	-4.39547
CDKL3	0.271039	3.3508	1.5423	0.142144	0.996813	-4.39607
OR3D1P	0.197062	1.79907	1.54116	0.14242	0.996813	-4.39719
MSMB	0.207603	4.01574	1.54093	0.142477	0.996813	-4.39742
U2AF1	0.226834	6.76926	1.54079	0.142511	0.996813	-4.39756
MME	0.337131	2.92266	1.54043	0.142597	0.996813	-4.3979
TTI1	0.262398	4.54877	1.54029	0.142631	0.996813	-4.39804
MAP3K7CL	0.21971	2.74137	1.54011	0.142675	0.996813	-4.39822
HDAC9	0.209571	5.69531	1.53977	0.142758	0.996813	-4.39855
OTUD7A	0.265035	4.37909	1.53952	0.142818	0.996813	-4.3988
ZDHHC23	0.272117	4.59321	1.53931	0.142869	0.996813	-4.399
RBMY2QP	0.22639	2.79036	1.53892	0.142963	0.996813	-4.39938
VN1R38P	0.267639	2.98354	1.53887	0.142976	0.996813	-4.39943
TLE6	0.24758	4.82574	1.53828	0.14312	0.996813	-4.40001
EI24P1	0.240946	2.93923	1.5378	0.143236	0.996813	-4.40047
DCD	0.218151	4.19389	1.5378	0.143236	0.996813	-4.40047
NSL1	0.251719	4.40225	1.53773	0.143253	0.996813	-4.40054
PIGPP2	0.212732	1.81142	1.53767	0.143269	0.996813	-4.4006
FABP5P15	0.260189	3.48241	1.5376	0.143285	0.996813	-4.40067
SPANXA2-OT1	0.24456	3.85412	1.53754	0.143299	0.996813	-4.40073
FRMPD2B	0.290776	4.80995	1.53733	0.143352	0.996813	-4.40094
USP17L2	0.260658	3.18969	1.53721	0.14338	0.996813	-4.40105
RPL12P32	0.217122	5.07661	1.53618	0.143632	0.996813	-4.40206
KRT18P56	0.203193	3.99713	1.53614	0.143641	0.996813	-4.4021
KRTAP13-4	0.271848	1.82554	1.53611	0.143649	0.996813	-4.40213
COL18A1-AS2	0.273697	3.86643	1.53578	0.143728	0.996813	-4.40244
OFD1P9Y	0.196621	2.30367	1.53569	0.143751	0.996813	-4.40254
TM9SF4	0.244708	7.08705	1.53465	0.144006	0.996813	-4.40355
OR13C4	0.211818	2.00948	1.53346	0.144296	0.996813	-4.40471
CADM2	0.221226	2.04138	1.53303	0.144403	0.996813	-4.40513
TRGV2	0.254885	2.56792	1.53291	0.144432	0.996813	-4.40525
PHBP5	0.317413	4.74676	1.53254	0.144523	0.996813	-4.40561
EXPH5	0.328529	5.65735	1.53211	0.144629	0.996813	-4.40603
SMTN	0.20614	6.53318	1.53209	0.144632	0.996813	-4.40605
SPAG6	0.21793	3.04512	1.53204	0.144644	0.996813	-4.40609
MRPS12	0.304037	4.07089	1.53183	0.144696	0.996813	-4.4063
HNRNPUL2	0.239648	5.51298	1.53162	0.144748	0.996813	-4.40651
RRM1	0.288579	5.58744	1.53158	0.144757	0.996813	-4.40654
FAM74A3	0.212233	2.27005	1.53121	0.144849	0.996813	-4.40691
PAICS	0.268716	3.7245	1.53064	0.144988	0.996813	-4.40745
MRPL49	0.241942	3.45563	1.53051	0.145021	0.996813	-4.40759
ATP4A	0.206548	5.56721	1.5304	0.145047	0.996813	-4.40769
TRBV11-2	0.212744	3.55922	1.52954	0.145258	0.996813	-4.40852
TTC31	0.213094	6.20486	1.5293	0.145318	0.996813	-4.40876
TMEM255B	0.25982	5.17893	1.52915	0.145356	0.996813	-4.40891
RPRD1A	0.221993	4.19237	1.52911	0.145364	0.996813	-4.40894
GIPC3	0.225285	3.84313	1.52836	0.145549	0.996813	-4.40967
OR2A12	0.232386	2.21053	1.52825	0.145578	0.996813	-4.40979
WDR75	0.226611	5.67411	1.52762	0.145733	0.996813	-4.4104
RPL23AP69	0.237327	2.67719	1.52749	0.145765	0.996813	-4.41052
EFCAB12	0.258095	2.40903	1.52739	0.145789	0.996813	-4.41062
ZNF214	0.227079	4.06216	1.52727	0.14582	0.996813	-4.41074
PPP2R3C	0.294354	4.88659	1.52708	0.145867	0.996813	-4.41093
E2F4P1	0.225404	4.72466	1.52634	0.146048	0.996813	-4.41164
PABPC1P13	0.225032	2.46149	1.52627	0.146067	0.996813	-4.41171
PRPF38AP1	0.291042	4.45381	1.52615	0.146097	0.996813	-4.41183
FRY	0.298922	2.28425	1.52583	0.146175	0.996813	-4.41213
COX6A1	0.217752	6.44549	1.52558	0.146237	0.996813	-4.41238
RAB3GAP2	0.223581	6.5891	1.52557	0.146239	0.996813	-4.41238
FOXRED1	0.230794	4.76112	1.52506	0.146367	0.996813	-4.41289
SCUBE1	0.239973	4.30986	1.52503	0.146372	0.996813	-4.41291
TRAV23DV6	0.230524	2.22421	1.52503	0.146374	0.996813	-4.41291
MMEL1	0.241272	4.04227	1.52472	0.146451	0.996813	-4.41321
PGM5P4-AS1	0.202923	5.84137	1.52467	0.146463	0.996813	-4.41326
C10orf126	0.211733	2.34219	1.52364	0.146718	0.996813	-4.41426
PPP1R7	0.209527	3.73216	1.52356	0.146738	0.996813	-4.41434
C1orf216	0.240561	5.04514	1.52345	0.146767	0.996813	-4.41445
KIF2C	0.244764	3.25975	1.52326	0.146813	0.996813	-4.41463
PLCG1	0.29978	2.68373	1.52326	0.146814	0.996813	-4.41464
C6orf136	0.213165	7.29128	1.52321	0.146826	0.996813	-4.41468
POLG	0.245013	5.33784	1.52298	0.146882	0.996813	-4.4149
ACER1	0.238078	2.84445	1.52241	0.147024	0.996813	-4.41546
PARPBP	0.290066	4.03152	1.52233	0.147045	0.996813	-4.41554
OR5AK2	0.247976	1.65489	1.52185	0.147163	0.996813	-4.416
DDAH1	0.262218	6.33082	1.52131	0.147299	0.996813	-4.41653
NEFLP1	0.21667	2.88683	1.52122	0.147321	0.996813	-4.41661
MT1IP	0.247297	3.84192	1.52121	0.147323	0.996813	-4.41662
PSMD10P1	0.26005	3.53458	1.52042	0.147521	0.996813	-4.41739
AIMP1P2	0.20506	3.71741	1.52041	0.147522	0.996813	-4.41739
MRPL32P1	0.224781	4.65097	1.5204	0.147525	0.996813	-4.41741
VSTM5	0.199028	3.74828	1.51927	0.147808	0.996813	-4.4185
ARHGAP22	0.245595	3.36112	1.51866	0.147961	0.996813	-4.41909
KCNMA1-AS3	0.221597	4.31661	1.51863	0.147968	0.996813	-4.41912
C10orf53	0.211088	2.93359	1.51856	0.147986	0.996813	-4.41919
TMEM132A	0.190272	6.6458	1.51841	0.148023	0.996813	-4.41934
NPAP1	0.219563	2.7484	1.51812	0.148094	0.996813	-4.41961
ABCE1	0.308086	4.19361	1.518	0.148124	0.996813	-4.41973
TRAV25	0.233761	2.19199	1.51771	0.148197	0.996813	-4.42001
TXNP4	0.248353	2.48581	1.51742	0.148271	0.996813	-4.4203
MTND4P11	0.217529	1.84635	1.51736	0.148285	0.996813	-4.42035
GJA1P1	0.206425	4.22473	1.51734	0.148289	0.996813	-4.42036
TRMT5	0.20688	2.90331	1.5165	0.148502	0.996813	-4.42119
GNPNAT1	0.278725	4.12529	1.51611	0.1486	0.996813	-4.42156
UGT2B24P	0.232246	1.90123	1.51602	0.148622	0.996813	-4.42165
RPS18P12	0.234627	7.71488	1.51567	0.14871	0.996813	-4.42199
C19orf33	0.267289	6.33072	1.51564	0.148717	0.996813	-4.42201
PTBP1	0.22239	4.71586	1.51548	0.148756	0.996813	-4.42216
DRGX	0.265289	5.55146	1.51488	0.148909	0.996813	-4.42275
OGG1	0.243002	5.04508	1.51483	0.14892	0.996813	-4.4228
NF1	0.279977	4.00067	1.51481	0.148927	0.996813	-4.42282
ALX1	0.212567	1.82013	1.51479	0.148931	0.996813	-4.42284
HSPE1P6	0.356101	3.98294	1.51468	0.148959	0.996813	-4.42295
WNK2	0.227796	5.25166	1.51388	0.149158	0.996813	-4.42371
OR51H2P	0.288753	2.88753	1.51363	0.149222	0.996813	-4.42396
DDX39BP1	0.238029	5.53865	1.51355	0.149244	0.996813	-4.42404
DCAF12L1	0.224258	3.97871	1.51315	0.149343	0.996813	-4.42442
SMIM1	0.224416	5.33143	1.51308	0.14936	0.996813	-4.42449
FANCE	0.210654	2.88335	1.51298	0.149386	0.996813	-4.42458
STX18-AS1	0.25813	5.85635	1.51264	0.149472	0.996813	-4.42491
UOX	0.215286	1.64972	1.51254	0.149497	0.996813	-4.42501
PEG10	0.227346	3.39115	1.51222	0.149578	0.996813	-4.42532
RERG	0.231243	3.21902	1.51219	0.149585	0.996813	-4.42535
CCDC134	0.2132	5.19741	1.51197	0.149641	0.996813	-4.42556
ARFGAP3	0.224058	5.31413	1.51166	0.14972	0.996813	-4.42586
INTS2	0.258558	4.06375	1.51129	0.149814	0.996813	-4.42622
UGT2A2	0.187623	2.07027	1.51109	0.149863	0.996813	-4.42641
GOLGA2P2Y	0.252741	4.17676	1.51093	0.149904	0.996813	-4.42657
ATP9B	0.331324	3.50514	1.51052	0.150007	0.996813	-4.42696
RPL41P5	0.201121	9.59492	1.51019	0.150091	0.996813	-4.42728
EPN1	0.19455	5.7777	1.51018	0.150094	0.996813	-4.42729
CASP14	0.223598	2.51468	1.50993	0.150157	0.996813	-4.42753
CLEC18C	0.211864	5.2576	1.50967	0.150223	0.996813	-4.42778
ATP11C	0.283707	2.79698	1.50843	0.150537	0.996813	-4.42897
TMEM97	0.377239	5.6832	1.50827	0.150578	0.996813	-4.42913
WDR7	0.211934	3.12588	1.50795	0.150659	0.996813	-4.42944
RPS12P27	0.225814	5.40997	1.50781	0.150693	0.996813	-4.42957
RPL23AP52	0.235413	4.59358	1.5075	0.150773	0.996813	-4.42987
TMEM119	0.228297	5.98527	1.50706	0.150885	0.996813	-4.4303
VN1R2	0.228141	2.53779	1.50648	0.151031	0.996813	-4.43085
SLX4IP	0.388872	5.19355	1.50618	0.151109	0.996813	-4.43114
LOXHD1	0.200232	2.88301	1.50591	0.151178	0.996813	-4.43141
FALEC	0.22512	3.28637	1.50584	0.151196	0.996813	-4.43147
EIF3KP3	0.306768	5.05354	1.50506	0.151393	0.996813	-4.43222
PTP4A1P4	0.227847	1.95238	1.50503	0.151403	0.996813	-4.43225
OR2N1P	0.210117	1.75726	1.50481	0.151458	0.996813	-4.43246
RBMY2TP	0.26136	4.38674	1.50462	0.151506	0.996813	-4.43264
ZNF70P1	0.192319	5.37044	1.50455	0.151525	0.996813	-4.43272
ANKRD29	0.198651	3.04924	1.50439	0.151565	0.996813	-4.43287
OR4C4P	0.195996	2.42601	1.50433	0.151581	0.996813	-4.43293
FOXB2	0.244482	4.43754	1.50368	0.151747	0.996813	-4.43355
TYSND1	0.241745	5.72229	1.50346	0.151802	0.996813	-4.43376
DOK6	0.239843	2.11564	1.50328	0.151849	0.996813	-4.43393
MTAPP1	0.222933	2.17903	1.50322	0.151864	0.996813	-4.43399
IFNA4	0.239964	2.17104	1.50297	0.151927	0.996813	-4.43423
DENND4C	0.287471	2.7516	1.50286	0.151955	0.996813	-4.43434
RNF128	0.418642	3.79237	1.50232	0.152095	0.996813	-4.43486
OR2AQ1P	0.198171	2.88227	1.50231	0.152097	0.996813	-4.43487
JAKMIP3	0.220871	7.2287	1.50187	0.152208	0.996813	-4.43529
SUCLA2P1	0.200949	3.5479	1.50174	0.152242	0.996813	-4.43541
TJP2	0.276392	3.87713	1.50158	0.152283	0.996813	-4.43557
MTF2	0.22976	5.14754	1.50071	0.152508	0.996813	-4.43641
NPTX2	0.207897	3.83273	1.50055	0.152547	0.996813	-4.43656
ACVR2B	0.354808	3.92358	1.50036	0.152596	0.996813	-4.43674
CDH7	0.260707	3.62698	1.50014	0.152652	0.996813	-4.43695
WWC3-AS1	0.242731	3.14715	1.50005	0.152675	0.996813	-4.43704
TMCO2	0.260016	2.30325	1.49999	0.152693	0.996813	-4.4371
ZNF561	0.196505	5.39779	1.49987	0.152723	0.996813	-4.43722
ACSS3	0.282145	3.13196	1.49984	0.152729	0.996813	-4.43724
C11orf21	0.20519	4.58978	1.49976	0.152751	0.996813	-4.43732
RPL7L1P4	0.269604	2.60911	1.49887	0.15298	0.996813	-4.43817
WDR31	0.220583	3.63814	1.49874	0.153012	0.996813	-4.4383
ZNF781	0.259643	3.18983	1.49865	0.153036	0.996813	-4.43838
CSTP1	0.193014	2.24256	1.4985	0.153074	0.996813	-4.43852
CYFIP2	0.303406	4.0484	1.49839	0.153102	0.996813	-4.43863
IGHVII-53-1	0.291485	3.2967	1.49817	0.15316	0.996813	-4.43885
OR6R1P	0.256864	2.57138	1.49764	0.153295	0.996813	-4.43935
OR5M11	0.236869	2.13519	1.49763	0.153299	0.996813	-4.43936
POTEJ	0.206123	3.71162	1.49718	0.153415	0.996813	-4.4398
IGLVI-68	0.196706	5.01996	1.49717	0.153418	0.996813	-4.43981
SUN1	0.241531	5.83189	1.49711	0.153432	0.996813	-4.43986
NUDCD1	0.269046	2.49345	1.49677	0.153521	0.996813	-4.44019
TEX36	0.238966	2.82073	1.49662	0.15356	0.996813	-4.44034
PLEKHG4B	0.257782	3.89876	1.49606	0.153704	0.996813	-4.44087
SFI1	0.240795	3.96604	1.49528	0.153905	0.996813	-4.44162
MED28P3	0.230232	2.05685	1.49428	0.154163	0.996813	-4.44257
RPLP1	0.202864	9.15717	1.49353	0.154358	0.996813	-4.44329
CLTCL1	0.207053	5.3558	1.49322	0.154437	0.996813	-4.44358
TRABD	0.230927	5.55163	1.49314	0.154459	0.996813	-4.44367
ND2	0.195494	10.1383	1.49287	0.154529	0.996813	-4.44392
LRRD1	0.275549	1.8007	1.4927	0.154574	0.996813	-4.44409
HLA-DPA2	0.199622	3.31442	1.49261	0.154597	0.996813	-4.44417
USP50	0.288054	2.61638	1.49242	0.154645	0.996813	-4.44435
DNAH11	0.218906	3.32322	1.49233	0.154668	0.996813	-4.44444
UST	0.283484	3.52016	1.49216	0.154712	0.996813	-4.4446
ZNHIT1P1	0.250822	3.26893	1.49216	0.154713	0.996813	-4.4446
MAMDC4	0.184585	5.04457	1.49156	0.154869	0.996813	-4.44518
IRF6	0.217926	4.68735	1.49127	0.154943	0.996813	-4.44545
GNAT3	0.210779	2.6959	1.4906	0.155119	0.996813	-4.4461
CPNE9	0.228747	2.82356	1.49057	0.155125	0.996813	-4.44612
GOLGA8S	0.210084	5.31801	1.49028	0.155201	0.996813	-4.4464
PSMC1P12	0.247694	3.31479	1.49028	0.155202	0.996813	-4.4464
SERPINA7P1	0.256947	1.89665	1.48994	0.15529	0.996813	-4.44673
GALNT1	0.253211	4.98262	1.48958	0.155384	0.996813	-4.44707
MFN2	0.232264	3.759	1.48958	0.155384	0.996813	-4.44707
MTND4LP16	0.225717	1.94997	1.48955	0.155392	0.996813	-4.4471
SNX8	0.228814	4.65237	1.48932	0.155452	0.996813	-4.44732
HIRIP3	0.217583	3.22071	1.48926	0.155466	0.996813	-4.44737
OAF	0.222478	4.68982	1.48914	0.155499	0.996813	-4.44749
CLCN5	0.260926	4.21857	1.48872	0.155607	0.996813	-4.44789
RHEB	0.283118	2.70858	1.48868	0.155619	0.996813	-4.44793
GXYLT1P6	0.248055	2.06396	1.48786	0.155833	0.996813	-4.44871
MTND5P26	0.258423	3.01905	1.48783	0.155839	0.996813	-4.44874
MLANA	0.26134	3.49275	1.48758	0.155906	0.996813	-4.44898
SMIM10L1	0.257018	3.47951	1.48756	0.155911	0.996813	-4.449
H19	0.362834	7.12824	1.48693	0.156076	0.996813	-4.4496
SUSD3	0.26409	5.54281	1.48672	0.156131	0.996813	-4.4498
RPL17P40	0.22101	2.44897	1.48656	0.156173	0.996813	-4.44996
SNORD59B	0.3194	1.91902	1.48639	0.156217	0.996813	-4.45012
PES1	0.277038	4.95806	1.48637	0.156223	0.996813	-4.45014
RPL35AP4	0.237758	7.88203	1.48557	0.156431	0.996813	-4.4509
MTCO3P24	0.200731	2.18885	1.48545	0.156463	0.996813	-4.45101
MTND2P3	0.250652	1.62366	1.48532	0.156498	0.996813	-4.45114
FABP2	0.251272	3.33317	1.4853	0.156503	0.996813	-4.45116
PPIAP32	0.232131	2.47817	1.48513	0.156547	0.996813	-4.45132
CT47A5	0.208944	3.0237	1.48509	0.156557	0.996813	-4.45136
MEGF10	0.211261	4.32105	1.48456	0.156695	0.996813	-4.45186
RPLP2	0.212899	10.8276	1.48449	0.156715	0.996813	-4.45193
TREM1	0.263212	4.37437	1.48447	0.15672	0.996813	-4.45195
NR2E3	0.223583	4.51246	1.48431	0.156763	0.996813	-4.45211
LRFN5	0.226912	2.5218	1.48415	0.156805	0.996813	-4.45226
ANAPC1P1	0.265889	4.87285	1.48408	0.156823	0.996813	-4.45232
MCOLN1	0.210619	5.11039	1.4837	0.156923	0.996813	-4.45269
SPO11	0.223467	3.04486	1.48354	0.156964	0.996813	-4.45284
ANKRD37	0.251561	5.49641	1.48348	0.15698	0.996813	-4.45289
SERF1B	0.196078	5.52995	1.48235	0.157277	0.996813	-4.45397
SERF1A	0.196078	5.52995	1.48235	0.157277	0.996813	-4.45397
OACYLP	0.240575	3.60719	1.4819	0.157394	0.996813	-4.45439
DDX3X	0.260656	3.29635	1.48137	0.157536	0.996813	-4.4549
BCAM	0.197318	5.24404	1.48113	0.157597	0.996813	-4.45513
OR4D10	0.213687	1.79933	1.48113	0.157598	0.996813	-4.45513
RPL23AP38	0.228465	3.41202	1.48106	0.157617	0.996813	-4.4552
CLN3	0.235232	7.4478	1.48096	0.157642	0.996813	-4.45529
RANP2	0.288914	2.0494	1.48028	0.157822	0.996813	-4.45594
NRAP	0.271731	2.94086	1.48022	0.157839	0.996813	-4.456
CST12P	0.226978	3.14053	1.47991	0.15792	0.996813	-4.45629
HMGN2P5	0.184083	7.66213	1.47975	0.157962	0.996813	-4.45644
CCNB1IP1P1	0.217823	2.57789	1.47923	0.158101	0.996813	-4.45694
MYO7B	0.304079	3.40345	1.47894	0.158176	0.996813	-4.45721
PIDD1	0.260881	3.40888	1.47871	0.158237	0.996813	-4.45743
ID2	0.357153	4.66698	1.47839	0.158323	0.996813	-4.45774
DACT2	0.194945	5.03684	1.47833	0.158337	0.996813	-4.45779
MTHFD1	0.23508	5.70812	1.47823	0.158364	0.996813	-4.45789
UBE2HP1	0.207963	4.88364	1.47816	0.158383	0.996813	-4.45796
TMPRSS11CP	0.241833	2.10431	1.47775	0.15849	0.996813	-4.45834
OSBPL7	0.268678	3.83073	1.47772	0.158498	0.996813	-4.45837
NAALADL2-AS3	0.243244	1.67135	1.47767	0.158512	0.996813	-4.45842
YWHAB	0.218378	6.5037	1.47752	0.158552	0.996813	-4.45857
MAML3	0.23537	3.68874	1.47721	0.158635	0.996813	-4.45886
ALOX12B	0.250696	3.2273	1.47719	0.158639	0.996813	-4.45888
RPL30P10	0.253672	3.14494	1.4769	0.158718	0.996813	-4.45916
KATNBL1	0.282555	2.48079	1.47675	0.158756	0.996813	-4.45929
FGFBP1	0.249721	4.20382	1.47661	0.158793	0.996813	-4.45943
NAA38	0.200889	6.49385	1.47637	0.158858	0.996813	-4.45966
RPL13AP25	0.183247	7.94354	1.47617	0.15891	0.996813	-4.45985
PDE10A	0.287339	3.68571	1.47613	0.158921	0.996813	-4.45989
TBC1D4	0.186791	4.93455	1.47602	0.158949	0.996813	-4.45999
FDX1P2	0.268762	2.46983	1.47583	0.159	0.996813	-4.46017
PFDN2	0.238634	6.4141	1.47565	0.159048	0.996813	-4.46034
MS4A10	0.216287	3.18151	1.47556	0.159072	0.996813	-4.46043
PANK1	0.206512	4.98927	1.47551	0.159087	0.996813	-4.46048
ANKRD63	0.289068	4.02811	1.47523	0.15916	0.996813	-4.46074
NDUFB4P4	0.203721	5.71114	1.47481	0.159272	0.996813	-4.46114
FAM217B	0.290988	3.87257	1.47367	0.159576	0.996813	-4.46222
NADK2-AS1	0.186866	2.33776	1.47359	0.159595	0.996813	-4.46229
GOLGB1	0.264521	3.52547	1.47327	0.159681	0.996813	-4.4626
PRM2	0.190386	5.01364	1.47317	0.159708	0.996813	-4.46269
ANKRD13A	0.270226	2.70966	1.47304	0.159742	0.996813	-4.46282
CYCSP46	0.204554	4.45778	1.4729	0.159779	0.996813	-4.46295
SLC25A1P2	0.289413	3.61717	1.47245	0.159902	0.996813	-4.46338
ISCA1P2	0.262832	4.26854	1.47227	0.159949	0.996813	-4.46355
STXBP5L	0.272815	3.82132	1.47222	0.15996	0.996813	-4.46359
UQCRHP1	0.192114	3.28375	1.47212	0.159987	0.996813	-4.46369
GHRH	0.191672	4.85892	1.4718	0.160074	0.996813	-4.464
CYP4F12	0.230467	5.06229	1.4716	0.160127	0.996813	-4.46418
DCAF12L2	0.232541	2.72621	1.47134	0.160196	0.996813	-4.46443
[truncated: 25,303 more rows]

## Sheet: MU vs CT
Gene	logFC	AveExpr	t	P.Value	adj.P.Val	B
MEDAG	1.78242	4.90044	8.28448	1.22681e-06	0.0334944	5.07249
INHBA	1.44862	7.77313	7.42689	4.1543e-06	0.0372731	4.1304
BGN	2.13372	5.11028	7.29725	5.03513e-06	0.0372731	3.97804
GREM1	1.5265	6.24561	7.24296	5.46085e-06	0.0372731	3.91343
SULF1	1.87769	8.63094	6.91983	8.92309e-06	0.045118	3.51891
SNORA69	1.44448	3.06025	6.8348	1.01771e-05	0.045118	3.41221
AKAP12	1.52441	5.62328	6.75257	1.15679e-05	0.045118	3.30787
DKK3	1.34985	6.23902	6.65136	1.35601e-05	0.0462773	3.17788
FBLN5	1.06841	3.96357	6.52724	1.65089e-05	0.0491389	3.01607
MFAP2	1.7717	5.18263	6.42099	1.95702e-05	0.0491389	2.87547
CDR1	1.78772	4.60272	6.41379	1.97981e-05	0.0491389	2.86587
MNDA	1.2057	3.69343	6.20915	2.75998e-05	0.0601573	2.5893
MYLK	1.20648	5.40905	6.1716	2.93527e-05	0.0601573	2.53778
ANTXR1	1.78634	7.44588	6.04096	3.64221e-05	0.0601573	2.35657
VCAN-AS1	1.28624	3.30685	5.98238	4.0153e-05	0.0601573	2.27435
PCDH7	1.30297	4.23586	5.93167	4.37074e-05	0.0601573	2.20269
DSEL	1.30009	2.42872	5.91865	4.46721e-05	0.0601573	2.18422
FZD7	0.984645	4.77651	5.89771	4.62714e-05	0.0601573	2.15445
SFRP4	2.5832	6.88434	5.67898	6.70537e-05	0.0756037	1.83894
TUSC3	1.36034	5.44078	5.67419	6.76048e-05	0.0756037	1.83195
MMP2	1.47272	6.1009	5.64661	7.08773e-05	0.0756037	1.79155
CCDC80	1.54237	4.499	5.63747	7.19983e-05	0.0756037	1.77813
COL12A1	1.81234	7.7084	5.58768	7.84369e-05	0.0793142	1.7048
MEG8	0.9618	4.92831	5.5294	8.67484e-05	0.0808165	1.61841
RHOJ	1.36596	4.95867	5.48672	9.34148e-05	0.0808165	1.55478
RFTN2	1.21048	2.78529	5.42684	0.000103685	0.0808165	1.46498
TNFAIP6	1.20454	6.03738	5.42287	0.000104406	0.0808165	1.45901
FGF7	1.0478	3.77934	5.39287	0.00011003	0.0808165	1.41376
MRAS	0.985687	3.46949	5.36727	0.000115078	0.0808165	1.37504
THBS2	1.57161	4.27428	5.34257	0.000120179	0.0808165	1.33757
TGFB3	1.42938	5.54134	5.33186	0.000122464	0.0808165	1.32129
XGY2	1.87046	3.82387	5.30643	0.000128072	0.0808165	1.28255
PCBP3	0.922756	3.32698	5.30606	0.000128156	0.0808165	1.28199
PRDM6	0.87369	5.85443	5.3024	0.000128986	0.0808165	1.2764
ST6GAL2	2.34948	4.10611	5.29603	0.000130442	0.0808165	1.26668
MAF	1.10086	4.67131	5.28695	0.000132551	0.0808165	1.2528
MAP3K8	0.873728	4.05753	5.27366	0.000135697	0.0808165	1.23248
SNORD114-25	1.19007	4.58153	5.27172	0.000136164	0.0808165	1.2295
ANGPTL2	1.4685	5.44301	5.21752	0.000149881	0.0842454	1.14628
ACTA2	1.57905	7.65054	5.21259	0.000151199	0.0842454	1.13868
LGALS1	1.35923	9.10027	5.19441	0.000156162	0.0844445	1.11063
DCN	1.93347	7.10438	5.16864	0.000163489	0.0844445	1.07079
TIMP3	1.00413	5.58183	5.16713	0.000163928	0.0844445	1.06846
SPARC	1.90881	7.59098	5.12873	0.000175551	0.0867265	1.00888
CPQ	0.860652	5.42279	5.12134	0.000177888	0.0867265	0.997371
NCF1	0.95255	5.07141	5.10171	0.000184244	0.0882497	0.966797
CTSK	1.56928	7.14625	5.01857	0.000213905	0.0959641	0.836606
PYGO1	0.969973	4.60548	4.9926	0.00022416	0.0959641	0.795697
QKI	1.1489	5.56574	4.98167	0.000228627	0.0959641	0.778451
NRP1	1.01803	3.97218	4.97254	0.000232429	0.0959641	0.764033
GLT8D2	1.92847	4.25764	4.96692	0.0002348	0.0959641	0.755157
S100A8	1.38021	3.86047	4.96411	0.000235997	0.0959641	0.750709
FILIP1L	1.34379	6.67374	4.95598	0.000239492	0.0959641	0.737848
DUXAP8	1.00018	6.98734	4.95589	0.000239534	0.0959641	0.737695
ZEB1	0.89174	5.54243	4.9532	0.0002407	0.0959641	0.733445
RDX	1.24208	5.07327	4.95048	0.000241889	0.0959641	0.729134
BNC2	1.2119	4.61524	4.93296	0.000249686	0.0959641	0.701367
COL27A1	0.884372	4.86802	4.92572	0.000252987	0.0959641	0.689867
CYP1B1	1.0305	3.64276	4.90823	0.000261144	0.0959641	0.662074
SFRP2	2.14758	5.38478	4.90458	0.000262881	0.0959641	0.656267
MAP7D3	0.939668	4.24005	4.8845	0.00027265	0.0959641	0.624291
GRIA3	1.23795	4.57303	4.87425	0.000277777	0.0959641	0.607957
MYL9	1.32758	7.14043	4.86378	0.000283125	0.0959641	0.59123
CD93	1.09081	4.8267	4.85919	0.000285503	0.0959641	0.583893
ADAM12	0.997986	4.34531	4.85713	0.000286577	0.0959641	0.5806
MTCO3P23	1.06927	4.24427	4.82951	0.00030138	0.0987422	0.536398
CRYAB	1.01395	4.72475	4.82513	0.0003038	0.0987422	0.529375
RUNX1-IT1	0.850812	6.13121	4.81119	0.000311635	0.0995644	0.507012
VGLL3	1.33538	5.24361	4.72654	0.000363941	0.108375	0.370567
NOX4	1.0155	3.34485	4.72249	0.000366667	0.108375	0.363998
NID2	1.09615	3.24864	4.7179	0.000369775	0.108375	0.356566
PRKG1	1.1164	4.11429	4.71298	0.000373132	0.108375	0.348608
FPR3	1.11431	6.18842	4.69718	0.000384144	0.109763	0.322987
FCGR2A	0.929786	6.31441	4.68459	0.000393166	0.109763	0.302531
FAP	1.46973	6.11092	4.68301	0.000394313	0.109763	0.299965
COPZ2	1.32312	4.90167	4.67609	0.000399373	0.109763	0.288726
NRP2	1.48739	5.91709	4.67146	0.000402801	0.109763	0.281192
RBPMS	0.879229	8.39826	4.66385	0.000408498	0.109763	0.268809
LUM	2.0438	6.75486	4.65836	0.00041266	0.109763	0.259871
PRRX1	1.42406	4.917	4.65477	0.000415402	0.109763	0.254029
NEXN	1.50532	6.022	4.65125	0.000418114	0.109763	0.248291
BICC1	1.03495	4.84535	4.64332	0.000424283	0.110322	0.235371
LYNX1	0.853072	4.65349	4.63815	0.000428358	0.11033	0.226938
SPP1	2.35502	8.60201	4.6199	0.000443067	0.113053	0.197142
CTHRC1	1.38024	5.64555	4.61256	0.000449132	0.113061	0.18514
BASP1	1.04815	6.58855	4.60986	0.000451385	0.113061	0.180724
DUXAP10	0.97989	6.8875	4.59633	0.00046285	0.114879	0.158575
CALD1	1.18005	7.30328	4.58773	0.000470284	0.115673	0.144499
ADARB1	0.855534	3.74162	4.55303	0.000501593	0.12119	0.0875433
THBS1	1.04522	5.49555	4.53471	0.000518982	0.123454	0.0574073
PALLD	0.962254	6.94715	4.53365	0.000520007	0.123454	0.055661
COL3A1	1.46904	8.44109	4.52621	0.000527254	0.123991	0.0434191
CCL22	0.975985	3.08942	4.52206	0.000531351	0.123991	0.0365716
COL10A1	1.57726	4.528	4.50548	0.000548028	0.126799	0.00922633
FNDC1	0.820117	4.21245	4.48492	0.000569457	0.128986	-0.0247284
FLNA	0.830666	6.41548	4.47989	0.000574831	0.128986	-0.0330448
ITGA5	1.49773	5.96601	4.46594	0.000590005	0.128986	-0.0561205
SGIP1	1.44535	5.98169	4.46347	0.00059274	0.128986	-0.0602176
SLC2A3	1.0597	5.14103	4.46119	0.000595275	0.128986	-0.0639973
RAB23	0.881481	3.60251	4.44874	0.000609294	0.130125	-0.0846213
EDNRA	1.39486	5.77276	4.44151	0.000617592	0.130125	-0.0966091
RGCC	1.25205	3.95726	4.43382	0.00062655	0.130125	-0.109372
COL24A1	1.06969	4.30411	4.43331	0.000627151	0.130125	-0.110223
CEP295NL	1.25895	6.51573	4.43163	0.00062913	0.130125	-0.113014
AIF1	1.19442	4.77614	4.42727	0.000634285	0.130205	-0.120249
TNFSF13B	0.956155	3.83035	4.4171	0.000646491	0.131416	-0.137148
PRR16	1.11545	4.17595	4.41437	0.000649811	0.131416	-0.14169
SNORD113-6	0.99141	3.21122	4.39956	0.000668117	0.132108	-0.166329
ARHGAP31	1.27765	4.04181	4.39408	0.000675021	0.132108	-0.175448
ASPN	1.9202	4.89802	4.38879	0.000681759	0.132108	-0.18426
ACVR1	0.75836	6.20232	4.38787	0.000682931	0.132108	-0.185784
FCGR2B	1.07524	4.66355	4.38722	0.000683765	0.132108	-0.186867
POSTN	1.81338	5.09365	4.38422	0.000687639	0.132108	-0.191879
COL5A1	1.08221	4.77557	4.37565	0.000698796	0.132108	-0.206162
SLN	1.06083	3.23271	4.36592	0.000711696	0.132108	-0.222395
OSCP1	0.827396	2.98177	4.36435	0.000713797	0.132108	-0.225012
CCL3	0.858271	4.42351	4.36147	0.000717679	0.132108	-0.229827
FAM133CP	1.1017	4.80791	4.3609	0.000718448	0.132108	-0.230777
MDFIC	1.20085	6.47353	4.35547	0.000725815	0.132108	-0.239834
PTGIS	0.702884	4.85272	4.33741	0.000750914	0.134878	-0.270021
ITGAV	0.78188	2.96564	4.33119	0.000759773	0.135577	-0.280437
SLC11A1	0.735417	5.18572	4.32273	0.000771969	0.136859	-0.294582
COL6A2	0.873692	4.79727	4.30986	0.00079093	0.139316	-0.316141
LIMS2	0.796816	5.12995	4.30344	0.00080058	0.139948	-0.326918
ANOS1	1.27131	5.45733	4.29554	0.000812593	0.140414	-0.340154
RBMS1P1	0.781238	4.79586	4.28901	0.000822688	0.141264	-0.351128
ZNF532	1.22503	4.54649	4.28001	0.000836783	0.142787	-0.366231
COL15A1	0.719476	5.65716	4.26541	0.000860192	0.14575	-0.390763
DPYD	1.02486	6.24753	4.26138	0.000866784	0.14575	-0.397552
VEGFC	0.77951	5.11635	4.25932	0.000870167	0.14575	-0.401017
DOCK10	0.877571	2.28588	4.25593	0.000875752	0.145777	-0.406707
VCAN	1.62101	5.28021	4.25277	0.000881004	0.145777	-0.412025
EFEMP2	0.760982	5.00182	4.23564	0.000910049	0.148779	-0.440881
COL6A1	0.949156	6.22196	4.22509	0.000928419	0.15048	-0.458664
PLPP4	1.14625	4.66982	4.21748	0.000941903	0.15127	-0.471496
LAIR1	0.747656	3.66633	4.18608	0.000999712	0.155758	-0.524524
COL11A1	1.1917	5.88888	4.18592	0.00100002	0.155758	-0.524794
CAV1	1.0503	4.93766	4.18386	0.00100394	0.155758	-0.528279
COL1A2	1.091	8.25294	4.1823	0.00100693	0.155758	-0.53093
VSIG4	1.28186	3.84385	4.18194	0.00100762	0.155758	-0.531537
MXRA5	1.32298	5.75707	4.17196	0.0010269	0.155758	-0.548424
ALOX5AP	0.691029	6.61092	4.16904	0.0010326	0.155758	-0.553355
FER1L6-AS1	0.777031	2.9655	4.15905	0.00105241	0.157615	-0.57028
AKT3	0.726603	5.53063	4.12048	0.00113257	0.168051	-0.635692
FCGR2C	0.835444	5.0245	4.09534	0.00118817	0.175348	-0.67842
SRGN	0.674098	8.37875	4.08207	0.00121862	0.177919	-0.700993
CD84	0.768777	3.99478	4.0761	0.00123259	0.178606	-0.711153
TAGLN	0.91428	6.8655	4.07448	0.00123641	0.178606	-0.713916
C1S	1.23341	6.47358	4.06488	0.00125928	0.180005	-0.730267
FCGR3B	1.32346	4.8535	4.05275	0.00128882	0.181378	-0.750954
CC2D2A	0.878786	4.93488	4.02796	0.00135138	0.186163	-0.793253
A4GALT	0.781287	3.88603	4.02583	0.00135691	0.186163	-0.796898
IRF2BPL	0.664863	7.29882	4.0212	0.00136896	0.186877	-0.804792
ITGBL1	1.16927	3.82637	4.01851	0.00137605	0.18691	-0.809399
FN1	1.44286	5.22532	4.00982	0.00139914	0.187733	-0.824253
LRRC15	0.904171	5.99769	4.00885	0.00140174	0.187733	-0.825912
PLTP	0.673474	5.46418	4.00847	0.00140274	0.187733	-0.826549
COL6A3	1.29181	6.12851	4.00477	0.00141274	0.188053	-0.832889
PPP1R18	0.843994	6.71523	3.99846	0.0014299	0.188595	-0.84367
TCF4	0.810062	6.73668	3.99198	0.00144778	0.189126	-0.85477
ABCC9	1.23441	4.38604	3.98489	0.00146757	0.190798	-0.866892
GNG2	0.697746	5.34026	3.95409	0.00155692	0.19996	-0.919679
LOXL1	1.47223	6.30113	3.94763	0.00157634	0.201109	-0.930756
SRGAP2	0.75998	2.75582	3.94198	0.00159354	0.20142	-0.940447
RAB31	1.37297	5.3609	3.93622	0.00161127	0.202723	-0.950337
SNCAIP	0.856068	2.98071	3.93256	0.00162264	0.203217	-0.956619
JAM3	0.877404	4.73809	3.92374	0.00165036	0.204011	-0.971758
DYRK3	0.812915	4.12364	3.92341	0.0016514	0.204011	-0.97232
PLXDC2	1.39689	5.36691	3.91636	0.00167393	0.205864	-0.984432
PREX1	0.843322	5.28844	3.88403	0.00178137	0.215671	-1.04003
FPR1	1.04864	3.9051	3.88231	0.00178728	0.215671	-1.043
FBXO32	0.837223	5.44481	3.86577	0.00184513	0.219025	-1.07148
RGS4	0.933783	3.92079	3.84719	0.00191238	0.224853	-1.10349
CMTM3	0.922903	4.60506	3.8377	0.00194768	0.224853	-1.11985
FERMT2	0.74475	4.47308	3.8372	0.00194957	0.224853	-1.12072
HACD4	0.842428	4.63836	3.8359	0.00195448	0.224853	-1.12297
FBN1	0.808645	6.24279	3.8314	0.00197151	0.224853	-1.13073
LXN	0.874776	3.96278	3.82992	0.00197713	0.224853	-1.13327
CNN1	0.915734	6.40353	3.82543	0.00199434	0.224853	-1.14102
USH1G	0.616682	4.12914	3.82163	0.00200902	0.224853	-1.14758
CYTIP	0.815819	4.44062	3.82134	0.00201015	0.224853	-1.14809
CLIC4	0.762987	7.57138	3.82082	0.00201216	0.224853	-1.14898
SNORA54	0.863737	3.9294	3.81631	0.00202977	0.224853	-1.15677
AEBP1	1.1354	5.82468	3.81046	0.0020528	0.224853	-1.16687
LAPTM5	0.855957	5.13432	3.81004	0.00205446	0.224853	-1.16759
RSPO3	0.724765	4.13488	3.80984	0.00205526	0.224853	-1.16794
CDKL3	0.70341	3.62842	3.80962	0.00205613	0.224853	-1.16832
SVEP1	0.719825	4.70611	3.80848	0.00206067	0.224853	-1.17029
RASSF2	0.88353	3.98202	3.80685	0.00206718	0.224853	-1.17311
PDGFRA	1.17112	6.27695	3.7889	0.00214008	0.231859	-1.20412
GLI3	1.02864	4.1063	3.78187	0.00216934	0.233795	-1.21627
RNF152	0.685999	4.55214	3.7805	0.00217508	0.233795	-1.21863
PLPPR4	1.11886	3.19968	3.75902	0.00226733	0.241053	-1.2558
IGFBP4	0.634313	4.58321	3.75861	0.00226909	0.241053	-1.2565
CD163	0.972911	7.73345	3.75309	0.00229346	0.241178	-1.26606
GPR176	0.975185	3.58758	3.75235	0.00229677	0.241178	-1.26735
SSPN	0.901465	5.76441	3.74896	0.00231184	0.24183	-1.2732
C3	1.07782	8.92125	3.73576	0.00237166	0.245764	-1.29607
CACNA2D1	0.6791	2.04438	3.73262	0.00238611	0.245764	-1.30151
ARL4C	0.739632	6.58488	3.73095	0.00239386	0.245764	-1.30441
FCHO1	0.628645	2.52412	3.72398	0.00242636	0.246262	-1.31648
FGFR1	1.09553	5.51281	3.7194	0.00244798	0.247537	-1.32442
ADAMTS16	1.75557	4.12338	3.71463	0.00247069	0.248231	-1.33268
UBE2Q2P9	0.702123	4.16814	3.71414	0.00247304	0.248231	-1.33353
DBIP1	0.597276	4.06474	3.70662	0.00250932	0.248668	-1.34657
SERPINF1	1.2493	5.92447	3.70608	0.00251197	0.248668	-1.34752
TRPC1	0.771886	2.87634	3.70595	0.0025126	0.248668	-1.34774
LOX	1.3891	4.00349	3.70463	0.002519	0.248668	-1.35002
WDFY3-AS2	0.608575	4.61374	3.70383	0.00252293	0.248668	-1.35141
PODNL1	0.647109	4.60743	3.70113	0.00253614	0.249071	-1.35609
DHCR24	0.690839	3.84422	3.69366	0.00257314	0.25124	-1.36905
SNORD114-20	0.842513	2.35014	3.69267	0.00257808	0.25124	-1.37077
CHST3	0.785642	3.84995	3.69035	0.00258966	0.25124	-1.37478
PRKACB	0.678555	4.3806	3.68928	0.00259503	0.25124	-1.37664
RNF180	0.831548	3.33742	3.67756	0.00265471	0.254312	-1.39699
CLEC2B	0.954411	5.03652	3.6722	0.00268242	0.255121	-1.40629
PCDHB5	0.84146	3.4932	3.67117	0.00268776	0.255121	-1.40807
CD53	0.87104	7.03167	3.66682	0.00271055	0.255121	-1.41563
SPARCL1	1.05607	7.16009	3.66499	0.00272017	0.255121	-1.41881
IL6	1.04384	3.79316	3.66391	0.00272589	0.255121	-1.42069
FGF7P1	0.600644	4.20288	3.6626	0.00273282	0.255121	-1.42296
PTHLH	0.691789	4.61148	3.66164	0.00273791	0.255121	-1.42463
VIM	0.741337	4.29633	3.64733	0.00281497	0.260523	-1.44948
HECTD2	0.730871	4.73446	3.62994	0.00291163	0.264989	-1.47971
DAAM2	0.644353	3.40461	3.62918	0.0029159	0.264989	-1.48102
MMP1	0.864456	6.20851	3.6282	0.00292146	0.264989	-1.48273
GABARAPL1	0.777183	6.03029	3.62362	0.00294756	0.266471	-1.49069
RSU1P3	0.740136	5.03203	3.62014	0.00296757	0.266497	-1.49675
FLT1	0.664	3.16567	3.61848	0.00297712	0.266497	-1.49963
BCAT1	0.76924	3.80909	3.6125	0.00301191	0.26873	-1.51003
SRGAP2C	0.831886	5.12694	3.60532	0.00305421	0.270734	-1.52252
LAYN	0.710068	2.90174	3.60359	0.00306451	0.270768	-1.52554
CCND3	0.6649	3.29348	3.59758	0.00310047	0.270936	-1.53598
ADAMTSL4	0.703443	4.75149	3.58654	0.00316772	0.274231	-1.5552
LRRC17	0.793028	2.68925	3.58389	0.00318406	0.274231	-1.55981
VTRNA1-3	0.701738	6.08956	3.5625	0.00331923	0.28408	-1.59704
MSR1	0.74114	3.65593	3.55829	0.00334656	0.284672	-1.60439
LRRC6	0.683204	2.20619	3.55491	0.00336858	0.285618	-1.61026
SNORD114-14	1.22837	6.48473	3.54971	0.00340282	0.287628	-1.61932
EGR2	0.62727	3.846	3.53271	0.00351726	0.295472	-1.64894
HIVEP2	0.748301	2.87331	3.52983	0.00353701	0.295662	-1.65396
BDKRB1	0.588727	4.94994	3.52923	0.00354119	0.295662	-1.65502
CPNE8	0.775914	4.73055	3.52312	0.0035835	0.29717	-1.66565
LBH	0.669569	5.33234	3.52191	0.00359194	0.29717	-1.66776
SLC45A2	0.650604	3.09481	3.51978	0.00360689	0.29717	-1.67148
FGF7P2	0.667647	5.6401	3.51881	0.00361367	0.29717	-1.67316
DCBLD2	0.799739	5.75181	3.51417	0.00364645	0.298965	-1.68125
MORC3	0.645099	3.24006	3.51138	0.00366637	0.299066	-1.68613
KCNT2	0.769625	3.08716	3.51028	0.00367421	0.299066	-1.68804
TRPV2	0.608058	6.23584	3.50747	0.00369436	0.299066	-1.69294
TIMP1	0.726512	8.77967	3.50635	0.00370245	0.299066	-1.6949
GSDMC	0.605464	4.04711	3.499	0.0037558	0.30248	-1.70771
RBPMS2	0.682248	4.17397	3.49295	0.00380031	0.304011	-1.71826
STAB1	0.72067	5.04752	3.49188	0.00380821	0.304011	-1.72012
ST8SIA1	0.751853	2.08938	3.48988	0.00382305	0.304306	-1.72361
CDH11	0.782116	5.07299	3.48639	0.00384914	0.305492	-1.7297
EGR1	0.709935	5.39592	3.48189	0.00388306	0.306402	-1.73756
ABCA1	0.660238	4.71694	3.47579	0.00392944	0.309169	-1.74819
ZNF486	0.582244	3.30374	3.47068	0.00396874	0.309585	-1.7571
MAP4K4	0.665077	5.23817	3.4661	0.00400434	0.310966	-1.7651
WIPI1	0.618056	5.49493	3.46184	0.00403766	0.310966	-1.77252
IGFL1P1	0.855087	3.478	3.45905	0.00405967	0.310966	-1.77739
WWC2	0.70946	4.14473	3.45576	0.00408577	0.310966	-1.78313
IRAK2	0.695284	2.53781	3.44282	0.0041901	0.313978	-1.80571
SDC2	0.718441	5.22787	3.44131	0.00420245	0.313978	-1.80834
GJB2	0.945314	6.43376	3.44051	0.00420906	0.313978	-1.80975
WWTR1	0.656022	5.80138	3.43101	0.00428773	0.318975	-1.82634
CLEC5A	0.776203	3.68476	3.423	0.00435518	0.322236	-1.84031
GNAI2P1	0.721292	4.56158	3.41319	0.00443929	0.325671	-1.85744
DRAM1	0.575461	2.60652	3.41306	0.0044404	0.325671	-1.85766
PDPN	0.717211	2.84709	3.40356	0.0045234	0.328492	-1.87425
ZNF79	0.748272	4.18111	3.39942	0.00456005	0.328492	-1.88147
GYG2	0.684006	3.28041	3.38962	0.00464809	0.332359	-1.89859
SLCO2B1	0.70463	3.57065	3.38804	0.00466242	0.332359	-1.90135
KLF7	0.716853	6.00542	3.38306	0.00470791	0.3336	-1.91004
PECAM1	0.666528	5.1446	3.38103	0.00472657	0.3336	-1.91359
PALMD	0.61072	5.37387	3.3808	0.00472871	0.3336	-1.91399
CCDC150P1	0.582958	3.71748	3.37878	0.0047474	0.334056	-1.91752
HTRA1	0.882886	4.16243	3.37676	0.00476609	0.334509	-1.92104
HECW1	0.568779	3.53046	3.37357	0.00479583	0.335733	-1.92661
GZMK	0.669489	2.73646	3.36179	0.00490733	0.33919	-1.94719
C1R	0.922419	3.64935	3.35745	0.0049491	0.341213	-1.95477
VSTM4	0.984438	5.13428	3.33776	0.00514288	0.351848	-1.98915
NAV1	0.757647	5.9764	3.33529	0.00516779	0.351848	-1.99348
FHL3	0.623306	3.7153	3.32393	0.00528353	0.355548	-2.0133
ZNF334	0.574833	2.40539	3.31902	0.00533444	0.35784	-2.02189
PHTF2	0.690836	3.15007	3.31193	0.00540872	0.359106	-2.03426
COLEC12	1.36251	4.27032	3.31183	0.00540986	0.359106	-2.03445
ZNF25	0.754798	3.08622	3.31135	0.00541493	0.359106	-2.03529
IGF2	0.626906	5.13207	3.31007	0.00542845	0.359106	-2.03752
ADGRG7	0.650119	2.50649	3.30958	0.00543366	0.359106	-2.03838
ADAP2	0.568909	5.38589	3.30734	0.00545747	0.359106	-2.04229
FSTL1	0.626476	4.7235	3.29968	0.00553963	0.36214	-2.05566
CALCRL	0.682811	4.16024	3.29799	0.00555795	0.362155	-2.05862
GAS1	0.629411	5.07517	3.29658	0.00557324	0.362287	-2.06108
GLIS3	1.05971	5.32864	3.29276	0.00561494	0.363882	-2.06775
GPX8	0.803935	5.31211	3.28632	0.00568597	0.364409	-2.07899
EMCN	0.964803	4.74091	3.285	0.00570062	0.364493	-2.0813
GJA1	0.665085	4.36882	3.27899	0.00576795	0.366503	-2.0918
BNIP2	0.599512	4.30901	3.27582	0.0058037	0.36764	-2.09733
MEG3	0.550154	6.63704	3.27237	0.00584296	0.368504	-2.10336
BDP1	0.552294	3.95519	3.26574	0.00591904	0.368653	-2.11494
FLJ43663	0.707781	5.54286	3.26385	0.00594098	0.368653	-2.11825
BMPR1B	0.644177	3.22491	3.26255	0.00595605	0.368653	-2.12051
SMO	0.585476	4.05304	3.26221	0.00595998	0.368653	-2.1211
MYO5A	0.669329	4.50498	3.26217	0.00596039	0.368653	-2.12116
ITPRIP	0.746044	5.67066	3.26102	0.00597382	0.368653	-2.12318
ASAP1	0.657634	5.02886	3.2565	0.00602674	0.369757	-2.13107
RELL2	0.60174	4.38411	3.2504	0.00609896	0.371682	-2.14172
BLID	0.595261	4.27622	3.24519	0.00616125	0.37381	-2.15081
OSMR	0.706047	3.11107	3.24012	0.00622263	0.375864	-2.15968
MAB21L2	0.724364	6.49138	3.23406	0.00629658	0.379098	-2.17025
COL1A1	0.646979	6.32078	3.23075	0.00633742	0.379475	-2.17603
ZNF518B	0.692865	4.49936	3.22021	0.00646922	0.383916	-2.19444
NACC2	0.556649	3.54524	3.21204	0.00657326	0.388448	-2.2087
PTPRM	0.817979	5.48303	3.20966	0.00660379	0.389409	-2.21284
FASTKD2	0.561393	2.70952	3.20337	0.00668545	0.391584	-2.22383
AIPL1	0.616495	2.25803	3.19928	0.00673895	0.391584	-2.23096
CHST11	0.735559	6.06593	3.19457	0.00680117	0.391584	-2.23918
FTH1	0.613534	7.39949	3.19285	0.00682407	0.391584	-2.24218
SGCD	0.593748	3.1625	3.1921	0.00683406	0.391584	-2.24349
HS3ST3A1	0.527421	2.47114	3.19155	0.00684146	0.391584	-2.24446
B3GNTL1	0.558701	3.75852	3.18897	0.00687604	0.39192	-2.24896
POT1-AS1	0.662859	2.43542	3.18748	0.00689598	0.392	-2.25155
ST3GAL1	0.721485	4.88562	3.1779	0.00702614	0.395212	-2.26826
FCER1G	0.935133	7.53324	3.17574	0.00705584	0.395212	-2.27203
CNN3	1.0582	6.44375	3.17556	0.00705834	0.395212	-2.27235
PROK2	0.749035	5.2831	3.17514	0.00706408	0.395212	-2.27308
NUAK1	0.587234	6.01873	3.16435	0.00721451	0.399534	-2.29191
CASC15	0.574654	5.31411	3.16303	0.00723313	0.399636	-2.29421
CDK14	0.839424	3.56344	3.16214	0.00724561	0.399636	-2.29575
ISLR	0.533488	4.35191	3.15938	0.00728482	0.400988	-2.30058
A2M	0.722415	6.30943	3.15246	0.0073838	0.403232	-2.31263
GFPT2	0.758662	4.24361	3.14569	0.007482	0.407046	-2.32444
MAPKBP1	0.592375	5.58686	3.14431	0.00750224	0.407046	-2.32685
IGFBP5	0.774907	6.34001	3.14402	0.00750646	0.407046	-2.32735
S100A9	0.869779	4.93518	3.1435	0.00751415	0.407046	-2.32827
ZNF385A	0.623994	4.27247	3.13938	0.00757478	0.407903	-2.33545
PRAMEF18	0.668225	2.88993	3.13817	0.00759261	0.408058	-2.33755
CFI	0.699986	4.14646	3.12825	0.00774104	0.414404	-2.35484
SNRK	0.695407	4.07368	3.12288	0.00782267	0.415317	-2.36421
C1orf162	0.720592	5.2722	3.1218	0.00783909	0.415317	-2.36609
CHI3L1	0.722451	3.94115	3.11819	0.00789461	0.41588	-2.37239
JUND	0.651624	3.42805	3.11677	0.00791643	0.41588	-2.37485
HIF1A	0.904124	7.04364	3.11458	0.00795029	0.416029	-2.37867
RUNX1	0.73882	7.68254	3.11092	0.0080073	0.417205	-2.38505
RUNX1T1	0.706556	5.9727	3.10918	0.00803462	0.417802	-2.38809
ANXA6	0.63712	3.11231	3.10824	0.00804937	0.417802	-2.38972
PNO1	0.621614	3.01765	3.106	0.00808458	0.41804	-2.39362
GAB3	0.644528	5.09396	3.10099	0.00816394	0.419759	-2.40234
H19	0.640915	6.29244	3.09862	0.00820178	0.420912	-2.40647
KLHL28	0.513688	3.36327	3.09266	0.00829775	0.423449	-2.41686
NNMT	0.767139	5.92377	3.09089	0.00832645	0.424121	-2.41994
MSRB3	0.743136	3.77492	3.08782	0.00837649	0.424448	-2.42529
RNF217	0.721648	5.17119	3.08763	0.00837952	0.424448	-2.42561
ITGA11	0.590296	2.97683	3.08521	0.00841915	0.425485	-2.42982
GPR65	0.673546	3.96681	3.08126	0.00848428	0.425805	-2.4367
ARHGAP1	0.634945	5.74528	3.07991	0.00850659	0.425971	-2.43905
RHOQP3	0.587777	5.61341	3.07918	0.00851879	0.425971	-2.44033
PTP4A3	0.521435	5.86846	3.07237	0.00863264	0.429305	-2.45217
TSHZ2	0.710577	3.96938	3.06488	0.00875962	0.432223	-2.46521
PPFIBP1	0.554661	3.58276	3.06112	0.00882407	0.4333	-2.47175
SPOCK1	0.736484	5.23363	3.05538	0.00892353	0.435832	-2.48175
MRPL40	0.573557	3.31645	3.05207	0.00898131	0.437091	-2.48751
SETP4	0.606016	3.05424	3.04026	0.00919034	0.444327	-2.50803
SH3PXD2B	0.560599	6.54947	3.04	0.0091951	0.444327	-2.50849
GABRB3	0.632235	3.70575	3.0366	0.00925632	0.444922	-2.51441
RUSC2	0.738118	3.04821	3.03429	0.00929795	0.445539	-2.51841
TBC1D9	0.901681	3.60629	3.03181	0.00934305	0.446732	-2.52273
RNF222	0.537882	2.95105	3.03017	0.00937298	0.447379	-2.52558
NCF1B	0.565953	5.25323	3.02361	0.00949365	0.449112	-2.53698
C11orf86	0.572612	4.96367	3.01786	0.0096005	0.450366	-2.54696
PCDHB10	0.581775	2.83398	3.01429	0.00966756	0.45131	-2.55317
INPP5E	0.49437	3.15475	3.01318	0.00968857	0.451395	-2.5551
MEIS3P1	0.594007	4.14269	3.0122	0.00970704	0.451485	-2.5568
BBS9	0.645584	2.85318	3.01022	0.00974461	0.452461	-2.56025
IL1R1	0.60313	4.99596	3.00272	0.00988791	0.454696	-2.57326
DCST2	0.557702	3.38864	3.00121	0.00991712	0.454696	-2.57589
ADAMTS9-AS2	0.683236	3.79026	3.00075	0.00992596	0.454696	-2.57668
GNAI2	0.754773	5.05668	2.99759	0.00998719	0.455209	-2.58216
MFAP5	0.693473	3.16948	2.99645	0.0100095	0.455467	-2.58415
BEGAIN	0.5207	4.32459	2.99545	0.0100289	0.45559	-2.58588
SLC30A4	0.647496	4.52193	2.99391	0.0100591	0.455703	-2.58855
PRAMEF7	0.506614	3.6201	2.99222	0.0100924	0.455703	-2.5915
TNFRSF10C	0.574123	4.66743	2.99204	0.0100957	0.455703	-2.5918
KDR	0.633659	4.93771	2.98655	0.0102044	0.459736	-2.60133
FLG-AS1	0.663425	2.08839	2.98166	0.010302	0.463369	-2.60981
HECW2	0.515989	3.97791	2.98002	0.010335	0.464089	-2.61267
HYDIN2	0.555548	2.22405	2.97917	0.010352	0.464091	-2.61413
EXOC5	0.526872	4.79345	2.97771	0.0103816	0.464655	-2.61668
MAN2B1	0.497788	5.78422	2.96994	0.0105399	0.470964	-2.63015
TMEM154	0.740906	3.52798	2.96837	0.0105721	0.471633	-2.63287
RPS16P5	0.543742	4.38833	2.967	0.0106002	0.472117	-2.63524
CTSB	0.76115	5.95354	2.96338	0.0106753	0.473947	-2.64153
DACT1	0.683284	5.10611	2.96057	0.0107337	0.473947	-2.64638
GPR34	0.807541	4.6726	2.96001	0.0107455	0.473947	-2.64736
FLRT2	0.671476	2.87616	2.95734	0.0108016	0.474887	-2.65199
LRRN2	0.570042	3.60597	2.9548	0.010855	0.476467	-2.65639
SNX10	0.543616	3.82625	2.95255	0.0109027	0.477793	-2.66029
PIGCP2	0.57917	2.93271	2.95149	0.0109252	0.478014	-2.66213
PNRC1	0.521748	6.96906	2.95025	0.0109515	0.478397	-2.66427
OR7E86P	0.487784	3.95803	2.94827	0.0109939	0.47861	-2.66771
RND1	0.538557	3.05714	2.94756	0.011009	0.47861	-2.66893
MRC2	0.483044	5.25631	2.94581	0.0110467	0.479485	-2.67197
DCHS1	0.595383	3.09961	2.93983	0.0111759	0.481268	-2.68232
ZNF679	0.628751	3.4456	2.93779	0.0112204	0.482424	-2.68586
GLI2	0.705262	4.08649	2.93547	0.011271	0.483451	-2.68986
IQCJ	0.573805	4.11401	2.93395	0.0113044	0.483451	-2.6925
CHST15	0.495848	6.09616	2.93308	0.0113235	0.483451	-2.694
NR2F2	0.524198	6.48116	2.93188	0.01135	0.483451	-2.69608
CRMP1	0.516901	5.98627	2.93186	0.0113505	0.483451	-2.69612
FTH1P2	0.644178	8.73732	2.9288	0.0114183	0.485582	-2.70142
IFI16	0.694053	8.26721	2.9238	0.0115299	0.488045	-2.71007
ZNF420	0.723247	2.92681	2.91813	0.0116577	0.49123	-2.71988
KALRN	0.491312	3.58384	2.91536	0.0117206	0.49123	-2.72467
ASNSP6	0.591631	3.22549	2.9148	0.0117333	0.49123	-2.72564
NID1	0.545598	4.50995	2.91478	0.0117338	0.49123	-2.72567
RPL15P2	0.482071	2.4777	2.91425	0.0117458	0.49123	-2.72658
FAM168A	0.57659	4.08533	2.91365	0.0117596	0.49123	-2.72762
FCGR3A	0.833992	3.83276	2.91332	0.0117671	0.49123	-2.72819
VEGFB	0.498314	8.19798	2.91033	0.0118357	0.493341	-2.73336
TMEM255A	0.496514	4.02801	2.90388	0.0119851	0.494576	-2.74452
ADAMTS5	0.51367	4.31917	2.9024	0.0120197	0.494576	-2.74709
SPI1	0.649562	6.27246	2.90052	0.0120637	0.494576	-2.75034
CEP170	0.531575	5.22671	2.90045	0.0120654	0.494576	-2.75046
CCL14	0.489096	4.58076	2.8941	0.0122151	0.497755	-2.76142
IL17RA	0.481187	3.83666	2.88472	0.0124397	0.504709	-2.77762
IGFBP2	0.529105	6.36293	2.88136	0.0125212	0.506527	-2.78343
LRP2	0.611358	2.64902	2.88128	0.0125231	0.506527	-2.78356
HLA-DRA	0.817003	5.76967	2.87897	0.0125794	0.507299	-2.78754
FAM20A	0.698553	3.21396	2.87806	0.0126016	0.507446	-2.78911
LY96	0.989687	5.44198	2.86973	0.0128073	0.511955	-2.8035
XIST	0.494613	6.25298	2.86693	0.0128771	0.513244	-2.80834
STAU2-AS1	0.514087	2.72106	2.86584	0.0129044	0.513284	-2.81021
SEC14L1	0.544533	5.34242	2.86538	0.0129158	0.513284	-2.811
TMEM106A	0.531606	5.30307	2.86276	0.0129817	0.513565	-2.81552
UBE2Q2P12	0.545622	3.80927	2.86159	0.0130113	0.513565	-2.81754
F7	0.465504	4.75094	2.86095	0.0130274	0.513565	-2.81864
RRAS	0.489465	5.73013	2.85945	0.0130653	0.513565	-2.82122
ROBO1	0.911924	4.95345	2.85917	0.0130726	0.513565	-2.82172
RASSF4	0.608385	3.5803	2.8584	0.0130921	0.513565	-2.82304
CASP8	0.571734	2.59989	2.85762	0.0131118	0.5136	-2.82438
ATP6V1C1	0.55396	4.66449	2.85272	0.0132373	0.517638	-2.83284
TPM1	0.597098	7.0948	2.85054	0.0132932	0.517638	-2.83658
SAMSN1	0.512374	3.97132	2.84645	0.0133992	0.518974	-2.84364
ROR2	0.711195	3.8996	2.84504	0.0134359	0.518974	-2.84607
THPO	0.560433	3.41616	2.84439	0.0134528	0.518974	-2.84718
FCGR1A	0.577069	3.99328	2.84325	0.0134826	0.519185	-2.84915
MTRF1LP1	0.474847	4.6708	2.83955	0.0135797	0.520952	-2.85552
FKBP7	0.66065	4.30811	2.83916	0.01359	0.520952	-2.85619
ARHGAP26-IT1	0.516286	3.56037	2.83874	0.013601	0.520952	-2.85691
CLMP	0.533861	6.52336	2.83528	0.0136926	0.520952	-2.86287
GK3P	0.463452	2.91042	2.835	0.0137002	0.520952	-2.86336
C5orf46	0.62456	3.18445	2.83118	0.0138019	0.523362	-2.86993
TOMM40L	0.460361	3.90023	2.83039	0.0138233	0.523443	-2.8713
ACVR2A	0.550977	5.18131	2.82508	0.0139662	0.525779	-2.88043
PER3	0.777742	3.41505	2.82507	0.0139664	0.525779	-2.88044
TM6SF1	0.604251	4.01804	2.82431	0.0139871	0.525779	-2.88175
OTX2-AS1	0.484095	4.65664	2.82382	0.0140005	0.525779	-2.8826
SLC12A8	0.531366	4.90286	2.82003	0.0141037	0.527392	-2.88912
PKD2	0.597401	2.7677	2.81932	0.0141231	0.527392	-2.89034
COL14A1	0.860029	4.97604	2.81873	0.0141391	0.527392	-2.89135
MGARP	0.512699	3.59096	2.81836	0.0141495	0.527392	-2.892
CACNG2	0.531513	2.99435	2.81704	0.0141856	0.527392	-2.89426
B3GALNT1	0.494605	3.25597	2.81352	0.0142827	0.529817	-2.90031
DPYSL2	0.472846	5.36176	2.80847	0.0144233	0.531503	-2.909
SNORA12	0.529091	4.09275	2.80753	0.0144495	0.531503	-2.91061
PGBD4P1	0.478482	2.49203	2.80531	0.0145117	0.531503	-2.91442
PDGFC	0.470578	2.28535	2.80506	0.0145188	0.531503	-2.91486
BEND6	0.635729	2.78523	2.7987	0.0146989	0.531503	-2.92579
EBF3	0.508595	4.13304	2.7976	0.0147301	0.531503	-2.92767
RNF41	0.500843	5.09626	2.79619	0.0147704	0.531503	-2.93009
TLR8	0.559704	2.92775	2.79556	0.0147883	0.531503	-2.93117
PBX3	0.643974	4.25539	2.79478	0.0148107	0.531503	-2.93251
RGS16	0.575825	4.82378	2.79335	0.0148519	0.531503	-2.93497
ADAM19	0.599026	5.50866	2.79334	0.0148523	0.531503	-2.93499
ACSL4	0.635979	4.82741	2.79287	0.0148658	0.531503	-2.9358
SLC7A9	0.451452	2.17948	2.79206	0.014889	0.531503	-2.93718
SPANXN4	0.468336	2.32577	2.79075	0.014927	0.531503	-2.93944
IFITM2	0.545507	6.68767	2.7889	0.0149805	0.531503	-2.94261
OLFML2B	0.711437	5.96452	2.78836	0.0149959	0.531503	-2.94353
PRKD1	0.906709	2.67133	2.78749	0.0150212	0.531503	-2.94502
LPAR4	0.529973	2.65728	2.78727	0.0150278	0.531503	-2.94541
ARRB2	0.488974	7.18516	2.78618	0.0150596	0.531503	-2.94728
NR3C1	0.769746	3.61158	2.78406	0.0151215	0.532019	-2.95092
BST2	0.568654	6.61188	2.78064	0.0152217	0.532966	-2.95677
CRTAC1	0.509027	1.70575	2.77442	0.0154064	0.537253	-2.96746
BTK	0.539194	3.14116	2.77158	0.015491	0.538087	-2.97231
C5AR1	0.880082	6.27428	2.76865	0.0155792	0.53962	-2.97734
GXYLT2	0.600275	4.35059	2.76822	0.0155922	0.53962	-2.97808
IFT81	0.485506	4.02766	2.76799	0.0155989	0.53962	-2.97846
TNFAIP3	0.622635	7.7087	2.76374	0.0157277	0.540382	-2.98575
RGS2	0.756621	6.42232	2.7635	0.0157353	0.540382	-2.98617
CALU	0.487263	6.7541	2.76138	0.0157999	0.541532	-2.9898
PEA15	0.730212	5.22023	2.76024	0.0158347	0.541532	-2.99175
LCN12	0.45935	2.6175	2.7598	0.0158481	0.541532	-2.9925
TREM1	0.546106	4.60246	2.75899	0.0158729	0.541558	-2.99389
C1QB	0.513756	5.28514	2.75829	0.0158943	0.541558	-2.99508
SHISA2	0.473598	3.64076	2.75168	0.0160989	0.542453	-3.00641
PCDH17	0.54472	3.33092	2.75138	0.0161084	0.542453	-3.00693
TREM2	0.494107	4.60178	2.74985	0.016156	0.543215	-3.00954
THY1	0.797988	6.07577	2.74678	0.016252	0.545102	-3.01479
PLD6	0.492727	3.77727	2.74285	0.0163761	0.547246	-3.02152
ZNF829	0.454779	2.41697	2.73647	0.0165792	0.549991	-3.03243
NTF3	0.511377	3.10786	2.73531	0.0166165	0.549991	-3.03442
SH3PXD2A	0.506149	4.5151	2.73437	0.0166467	0.549991	-3.03602
ARSF	0.610536	3.11268	2.73248	0.0167075	0.549991	-3.03925
MRGPRD	0.570774	3.9078	2.7316	0.0167359	0.549991	-3.04075
CT47A12	0.489549	4.49942	2.7296	0.0168007	0.549991	-3.04417
CT47A10	0.489549	4.49942	2.7296	0.0168007	0.549991	-3.04417
CT47A9	0.489549	4.49942	2.7296	0.0168007	0.549991	-3.04417
CT47A6	0.489549	4.49942	2.7296	0.0168007	0.549991	-3.04417
CT47A3	0.489549	4.49942	2.7296	0.0168007	0.549991	-3.04417
CT47A2	0.489549	4.49942	2.7296	0.0168007	0.549991	-3.04417
RHBDD1	0.53086	4.22667	2.72892	0.0168229	0.550058	-3.04534
TLR6	0.656042	2.42271	2.72615	0.016913	0.550371	-3.05007
ADGRE2	0.453077	2.47842	2.72553	0.0169332	0.550371	-3.05113
JAKMIP2	0.472673	3.31141	2.71626	0.017239	0.556625	-3.06696
CNTN4	0.59683	3.43425	2.71599	0.017248	0.556625	-3.06742
PTGDR	0.532282	3.7494	2.71433	0.0173032	0.557413	-3.07024
STX8	0.524289	5.08263	2.71403	0.0173132	0.557413	-3.07075
TRBV5-2	0.476233	2.57913	2.7113	0.0174047	0.559698	-3.07541
KCNA1	0.552756	3.5046	2.70846	0.0175003	0.560134	-3.08026
RARRES2	0.539809	6.0636	2.70685	0.0175548	0.561219	-3.08301
TSHB	0.493362	2.16591	2.70084	0.0177597	0.565783	-3.09327
CCDC27	0.446661	2.86784	2.6979	0.0178604	0.566414	-3.09826
XPOT	0.520472	4.28823	2.69783	0.0178628	0.566414	-3.09838
DUS2	0.493417	2.45678	2.69752	0.0178735	0.566414	-3.09891
ATF4P1	0.512739	4.86853	2.69673	0.0179008	0.566414	-3.10026
LPP	0.554691	6.45827	2.69369	0.0180061	0.567671	-3.10544
SLAMF8	0.464964	5.03093	2.69197	0.0180658	0.567906	-3.10837
ADGRL4	0.618895	4.50777	2.69163	0.0180778	0.567906	-3.10895
OR2B7P	0.469681	2.35554	2.69112	0.0180956	0.567906	-3.10982
GUCY1A2	0.506616	2.86991	2.6905	0.0181172	0.567906	-3.11088
C2orf83	0.460259	3.7215	2.69049	0.0181176	0.567906	-3.1109
MPPED2	0.532884	3.66392	2.6891	0.0181662	0.568777	-3.11326
PAGE5	0.608103	3.5119	2.6857	0.0182857	0.571208	-3.11905
PLXDC1	0.668581	4.40208	2.68216	0.0184108	0.572554	-3.12508
MEIS2	0.575177	5.28602	2.68186	0.0184214	0.572554	-3.12558
DLC1	0.654692	4.82542	2.67921	0.0185157	0.573717	-3.13009
IER3IP1	0.516411	3.30294	2.67869	0.0185341	0.573717	-3.13097
ADAMTS6	0.7036	4.63418	2.67686	0.0185998	0.575099	-3.1341
GYPC	0.543108	5.89413	2.67588	0.018635	0.575301	-3.13577
HMOX1	0.486737	4.68506	2.6755	0.0186485	0.575301	-3.13641
GANC	0.520813	2.42208	2.66821	0.0189122	0.58212	-3.14881
C2orf73	0.594694	2.43631	2.66323	0.0190945	0.584253	-3.15727
JAM2	0.85609	5.27205	2.66281	0.0191099	0.584253	-3.15798
SNAI2	1.00738	4.86668	2.66061	0.0191908	0.584851	-3.16171
FAM174B	0.545126	5.51091	2.65885	0.0192559	0.585439	-3.1647
SNORD114-21	0.606606	2.89876	2.65375	0.0194461	0.587327	-3.17337
GJA5	0.54474	3.85927	2.64903	0.0196234	0.590111	-3.18138
VNN2	0.439975	3.00004	2.64507	0.0197735	0.592598	-3.18811
CCDC88A	0.763303	4.06488	2.64212	0.019886	0.592717	-3.19311
DSE	0.573311	4.85267	2.63857	0.0200222	0.593785	-3.19913
CAMSAP2	0.521473	4.0554	2.63848	0.0200254	0.593785	-3.19927
GFRA1	0.468879	3.87598	2.63835	0.0200306	0.593785	-3.1995
BTNL10	0.504271	4.3574	2.63703	0.0200816	0.594193	-3.20174
MEF2C	0.544597	3.81358	2.63423	0.0201897	0.594193	-3.20647
TMEM204	0.47407	4.35029	2.63404	0.0201973	0.594193	-3.2068
TEDDM1	0.454098	2.39231	2.63359	0.0202146	0.594193	-3.20756
SLC25A14P1	0.504245	3.85491	2.6333	0.0202258	0.594193	-3.20805
IRAK3	0.842348	5.48428	2.63298	0.0202383	0.594193	-3.20859
PLN	0.433917	1.93308	2.63229	0.0202653	0.594193	-3.20977
GPRIN3	0.547146	4.69539	2.63185	0.0202824	0.594193	-3.21051
SLC7A13	0.475794	1.83511	2.63181	0.0202838	0.594193	-3.21057
HAPLN3	0.499547	3.19576	2.63051	0.0203345	0.595039	-3.21277
LAMA2	0.708987	4.51344	2.62913	0.0203886	0.595983	-3.21511
ZNF358	0.465723	3.76622	2.62738	0.0204574	0.596544	-3.21809
CYTH1	0.501685	5.18476	2.62638	0.0204964	0.596544	-3.21976
VPS41	0.504823	4.68812	2.62588	0.0205163	0.596544	-3.22062
FTH1P11	0.533291	5.98358	2.62586	0.020517	0.596544	-3.22065
SLIT2	0.471498	3.91171	2.6237	0.0206025	0.59821	-3.22431
HSPG2	0.599173	5.53959	2.62218	0.0206625	0.598863	-3.22688
SRBD1	0.480756	2.45022	2.61952	0.0207687	0.599338	-3.23139
C4BPAP2	0.475767	3.48595	2.61796	0.0208309	0.599338	-3.23403
RHOB	0.456256	7.50068	2.6179	0.0208332	0.599338	-3.23412
ALG1L15P	0.573063	4.25551	2.61672	0.0208803	0.599338	-3.23611
PNOC	0.496766	4.14329	2.61542	0.0209326	0.599338	-3.23832
SETDB1	0.582451	3.98866	2.61436	0.0209752	0.599338	-3.24011
TMEM140	0.45784	4.02675	2.61255	0.0210484	0.599338	-3.24318
GPR137B	0.500516	5.87547	2.61089	0.0211153	0.599338	-3.24597
THSD1	0.495656	3.99655	2.60899	0.0211928	0.599338	-3.2492
SNRPCP19	0.496927	3.75704	2.60853	0.0212114	0.599338	-3.24997
IL7R	0.558617	6.48585	2.60731	0.0212608	0.599338	-3.25202
CNTRL	0.549679	2.77618	2.60699	0.0212741	0.599338	-3.25257
EHD2	0.532704	4.03058	2.60684	0.0212803	0.599338	-3.25283
SNORD113-4	0.949831	4.48338	2.60602	0.0213135	0.599338	-3.2542
FTH1P21	0.461708	4.21512	2.6057	0.0213266	0.599338	-3.25474
HCG4B	0.520733	3.13034	2.60565	0.0213287	0.599338	-3.25483
ITGAX	0.42652	6.83612	2.60474	0.021366	0.599338	-3.25637
SNORA63	0.482176	5.01205	2.60397	0.0213977	0.599338	-3.25767
BNIP3	0.618082	5.8121	2.60327	0.0214265	0.599338	-3.25886
OR4A5	0.446402	2.2534	2.60315	0.0214314	0.599338	-3.25906
AFF3	0.587626	2.53769	2.60102	0.0215193	0.599657	-3.26266
CSGALNACT2	0.678156	5.09326	2.60089	0.0215246	0.599657	-3.26288
CDT1	0.451396	4.15077	2.59883	0.0216099	0.600459	-3.26636
GLIS2	0.51587	3.7599	2.59691	0.0216896	0.601188	-3.2696
CASS4	0.443438	3.32344	2.59494	0.0217714	0.601345	-3.27291
WNT5A	0.636494	3.6411	2.59466	0.0217834	0.601345	-3.2734
ACKR3	0.530915	3.41675	2.59265	0.0218671	0.601347	-3.27678
CT47A1	0.47846	3.81522	2.59146	0.0219173	0.601656	-3.27879
IFIT5	0.487777	3.79646	2.59071	0.0219489	0.601656	-3.28006
APOA2	0.523799	2.44874	2.58494	0.0221931	0.603245	-3.2898
ZBTB40-IT1	0.451199	3.77501	2.5847	0.0222033	0.603245	-3.2902
TMEM79	0.469618	4.28574	2.58407	0.0222298	0.603245	-3.29125
RMDN2	0.478739	2.24633	2.5839	0.0222373	0.603245	-3.29155
LRRC32	0.620181	5.29854	2.58372	0.0222447	0.603245	-3.29184
DIDO1	0.455144	3.64298	2.5835	0.0222541	0.603245	-3.29221
CIITA	0.451933	4.98047	2.57967	0.0224179	0.603245	-3.29866
NAIF1	0.439214	3.80769	2.57842	0.0224721	0.603245	-3.30079
TMEM200A	0.689039	3.57516	2.57831	0.0224767	0.603245	-3.30097
SRGAP2B	0.477094	4.85635	2.57727	0.0225214	0.603245	-3.30272
NFYB	0.598272	2.50028	2.5765	0.0225547	0.603245	-3.30401
RAI14	0.537757	4.91329	2.57356	0.0226819	0.603245	-3.30896
ZNF469	0.422258	3.30426	2.57215	0.0227433	0.603245	-3.31134
PHF24	0.454391	4.40766	2.5721	0.0227455	0.603245	-3.31142
MGAT2	0.491306	4.75426	2.57064	0.022809	0.603245	-3.31387
SPECC1L	0.546708	3.59183	2.57021	0.0228281	0.603245	-3.31461
CA5B	0.736012	3.79634	2.57009	0.0228332	0.603245	-3.31481
SMURF2	0.454122	2.2863	2.56996	0.0228387	0.603245	-3.31502
CFL2	0.457873	2.29273	2.56954	0.0228571	0.603245	-3.31572
TSGA10IP	0.453772	4.8734	2.5683	0.0229116	0.603245	-3.31782
LMO1	0.474345	4.01393	2.56787	0.0229304	0.603245	-3.31854
PLS3	0.568744	6.28065	2.5678	0.0229335	0.603245	-3.31866
UBE2Q2L	0.460889	5.72458	2.56748	0.0229478	0.603245	-3.31921
HLA-DRB9	0.601444	6.06105	2.56647	0.0229922	0.603245	-3.32091
TENM4	0.471031	2.76842	2.56629	0.0230001	0.603245	-3.32121
DKK2	0.591811	4.64675	2.56593	0.0230156	0.603245	-3.3218
OMD	0.596529	1.93175	2.56556	0.0230323	0.603245	-3.32244
OR10G6	0.496561	2.09598	2.56522	0.0230469	0.603245	-3.323
SLC2A14	0.741621	4.92622	2.56426	0.0230896	0.603245	-3.32462
COX7A1	0.494794	5.27339	2.5598	0.0232874	0.604291	-3.33212
FAM90A6P	0.432483	2.61532	2.55974	0.0232899	0.604291	-3.33221
GLIPR2	0.433649	5.60812	2.55901	0.0233225	0.604291	-3.33344
LDLRAD4-AS1	0.588782	3.36245	2.55838	0.0233509	0.604291	-3.33451
COL5A2	0.453113	5.14679	2.55613	0.0234513	0.605538	-3.33828
DPP10-AS2	0.537333	2.5073	2.55527	0.0234899	0.605591	-3.33973
CSF1	0.595893	4.93048	2.55278	0.0236023	0.606769	-3.34392
AP1S2	0.611176	5.507	2.54579	0.0239197	0.611397	-3.35566
MOG	0.43134	3.825	2.54537	0.023939	0.611397	-3.35636
GAMT	0.483033	3.99183	2.54428	0.0239888	0.611524	-3.35819
GLIPR1	0.514706	4.84447	2.54345	0.0240271	0.611564	-3.35959
SETBP1	0.445153	4.70602	2.54327	0.0240352	0.611564	-3.35988
NOVA1	0.533889	2.90568	2.54202	0.0240926	0.611949	-3.36198
PSMB11	0.448763	3.73066	2.54114	0.0241331	0.611949	-3.36345
PAM	0.579961	5.46987	2.53591	0.0243754	0.614083	-3.37222
MEFV	0.460626	4.26992	2.53456	0.0244387	0.614083	-3.3745
PARS2	0.533964	4.78433	2.53396	0.0244664	0.614083	-3.3755
LIM2	0.553619	3.3433	2.53055	0.0246264	0.616032	-3.38122
GP9	0.515314	2.81015	2.52947	0.024677	0.616032	-3.38302
SULF2	0.615678	7.61816	2.52836	0.0247297	0.616032	-3.38489
ADAM3B	0.652031	4.23153	2.52648	0.0248186	0.61614	-3.38804
UGCG	0.420339	6.53729	2.52471	0.0249024	0.61614	-3.391
HIPK3	0.473318	5.12882	2.52328	0.0249706	0.61614	-3.3934
UPF1	0.47717	4.17364	2.52281	0.0249928	0.61614	-3.39417
GULP1	1.05712	5.14847	2.52098	0.0250806	0.61614	-3.39725
PIN1	0.468042	4.40286	2.52068	0.0250946	0.61614	-3.39774
KIF26B	0.542013	3.79539	2.5197	0.0251418	0.61614	-3.39939
PDE10A	0.645358	3.67786	2.51939	0.0251567	0.61614	-3.39991
SOD2	0.769139	5.46284	2.51896	0.0251772	0.61614	-3.40062
AOC2	0.421012	3.33287	2.51871	0.0251893	0.61614	-3.40104
PPP1R3B	0.441056	3.44499	2.51834	0.0252071	0.61614	-3.40167
SERPINH1P1	0.555926	4.1825	2.51833	0.0252075	0.61614	-3.40168
PRG2	0.475785	3.79309	2.51811	0.025218	0.61614	-3.40205
SLC29A3	0.483015	4.27401	2.51757	0.0252442	0.61614	-3.40295
PDLIM7	0.419476	6.78436	2.51675	0.0252834	0.61614	-3.40432
OTUD5	0.451298	5.78956	2.51529	0.0253543	0.61614	-3.40677
ABCA9	0.47314	2.89798	2.51523	0.0253571	0.61614	-3.40687
HLA-DRB5	0.50314	5.08499	2.51101	0.0255619	0.617698	-3.41392
SNORA11	0.453289	11.604	2.5097	0.0256258	0.617698	-3.41611
MCEMP1	0.56192	5.13457	2.50879	0.0256704	0.617698	-3.41764
FGF16	0.583859	3.94428	2.50871	0.0256744	0.617698	-3.41777
KCNQ5-IT1	0.514252	2.35329	2.50793	0.0257124	0.617698	-3.41907
AHNAK2	0.566347	4.12384	2.50662	0.025777	0.617698	-3.42127
MASTL	0.510557	3.86582	2.50657	0.0257791	0.617698	-3.42134
[truncated: 26,627 more rows]
