# Supplementary material for: Molecular portraits of colorectal cancer morphological regions
Source: eLife. 2023 Nov 13;12:RP86655. doi: 10.7554/eLife.86655 (PMC10642970; doi:10.7554/eLife.86655)
Supplement: Supplementary file 10. [file elife-86655-supp10.xlsx]

## Sheet: CTDE_H
	pathway	pval	padj	ES	NES	nMoreExtreme	size	leadingEdge	Enrichment
1	EPITHELIAL_MESENCHYMAL_TRANSITION_up	0.000331126	0.00125182	0.644381	3.21258	0	197	LOX, PRRX1, COL6A3, BGN, CTHRC1, FN1, LAMA2, DCN, LOXL1, LUM, POSTN, SNAI2, LGALS1, SFRP4, MMP14, SFRP1, BASP1, THY1, EMP3, MFAP5, TIMP1, FBLN5, INHBA, ACTA2, ID2, COL3A1, MXRA5, EFEMP2, ABI3BP, SDC1, SPARC, COL1A2, FAP, SGCB, FBN1, VCAN, MGP, SLIT3, DAB2, TAGLN, COPA, VCAM1, COL11A1, IGFBP3, FSTL1, GLIPR1, ITGB1, NTM, SERPINE1, NID2, RGS4, THBS1, CALD1, ITGA5, PMP22, THBS2, FERMT2, CD59, ITGAV, …	Up-regulated
2	TGF_BETA_SIGNALING_up	0.000262881	0.00125182	0.550842	2.21022	0	54	RAB31, ID2, SMAD7, BCAR3, SKIL, NOG, ACVR1, SERPINE1, THBS1, SMAD3, PPM1A, WWTR1, IFNGR2, ENG, LTBP2, PMEPA1, FKBP1A, UBE2D3, CDK9, BMPR2, SLC20A1, SKI, JUNB, TGFBR1	Up-regulated
3	TNFA_SIGNALING_VIA_NFKB_up	0.000331895	0.00125182	0.4356	2.17228	0	198	GFPT2, INHBA, ID2, SLC16A6, SIK1, EGR1, GPR183, PNRC1, PDLIM5, SERPINE1, DUSP1, MSC, F3, NR4A2, GCH1, SMAD3, GEM, KLF9, IFNGR2, SLC2A3, PLAUR, TNFAIP6, PMEPA1, PLPP3, PANX1, IER2, BCL2A1, CDKN1A, CLCF1, PLEK, CXCL11, IL7R, DUSP4, IL6ST, IL23A, NFKBIA, IFIH1, OLR1, PLK2, TNFAIP3, SPSB1, ZFP36, ICAM1, SOD2, CD83, SGK1, ABCA1, FOSL2, NFE2L2, TNC, JUNB, TNFRSF9, TNFAIP8, FOS, IL1A, CCND1, NR4A3, EGR3…	Up-regulated
4	UV_RESPONSE_dn	0.000299043	0.00125182	0.445184	2.11204	0	139	ATRN, SNAI2, RUNX1, NEK7, FBLN5, COL3A1, SMAD7, COL1A2, EFEMP1, ADGRL2, DAB2, PTPRM, NRP1, PDLIM5, COL11A1, APBB2, ATP2B4, IGFBP5, CDON, SERPINE1, DUSP1, RGS4, PMP22, F3, NR3C1, SMAD3, CDC42BPA, SYNE1, COL1A1, SDC2, CITED2, PLPP3, SIPA1L1, NR1D2, PIAS3, LPAR1, VLDLR, CELF2, LTBP1, ATXN1, RASA2, TGFBR2, INPP4B, NIPBL, GJA1, KIT	Up-regulated
5	COAGULATION_up	0.000301114	0.00125182	0.442139	2.09222	0	138	FN1, MMP14, TIMP1, C3, SPARC, FBN1, C1S, C1R, CLU, CTSK, CPQ, GDA, MMP9, F9, KLF7, CFH, SERPINE1, THBS1, F3, CTSH, SIRT2, DUSP14, HTRA1, MMP2, LRP1, RAPGEF3, ANXA1, ADAM9, APOC2, RGN, MMP8, PLEK, CSRP1, MASP2, OLR1, SERPING1, ARF4, PECAM1, HNF4A, APOC1, A2M, GSN, CTSB, LAMP2, CFI, TFPI2, TIMP3	Up-regulated
6	INFLAMMATORY_RESPONSE_up	0.000332116	0.00125182	0.384671	1.9212	0	199	PCDH7, MMP14, EMP3, TIMP1, INHBA, MSR1, DCBLD2, SLAMF1, HIF1A, PIK3R5, GPR183, C3AR1, RGS1, SERPINE1, ITGA5, F3, LTA, GCH1, ROS1, CD48, AQP9, KCNA3, TACR1, IFNGR2, PLAUR, GNAI3, RASGRP1, EIF2AK2, TNFAIP6, AHR, C5AR1, BST2, CDKN1A, GABBR1, CALCRL, LPAR1, CXCL11, TPBG, IL7R, IFNAR1, CYBB, NFKBIA, OSMR, OLR1, ADGRE1, SLC31A2, LAMP3, CD55, IL10RA, ICAM1, TLR3, GPR132, MEFV, CMKLR1, ABCA1, TNFSF15, PD…	Up-regulated
8	COMPLEMENT_up	0.000331895	0.00125182	0.374641	1.86828	0	198	GNAI2, FN1, MMP14, TIMP1, PLA2G4A, ZEB1, C3, C1S, PIK3R5, C1R, CLU, CPQ, CFH, SERPINE1, S100A12, CBLB, S100A9, F3, CASP4, CTSH, CD59, LRP1, ANXA5, CR1, APOA4, PLAUR, DOCK10, GNAI3, RASGRP1, PCLO, JAK2, ADAM9, CDA, DGKG, C1QC, MMP8, PLEK, CSRP1, PIM1, PRCP, PLA2G7, OLR1, XPNPEP1, TNFAIP3, CD55, SERPING1, GZMK, ZFPM2, HNF4A, HPCAL4, CASP5, APOC1, LIPA, CTSB, LAMP2, RNF4, CDK5R1, TFPI2, HSPA5, KYNU,…	Up-regulated
9	HYPOXIA_up	0.000659631	0.00202815	0.345216	1.71524	1	193	LOX, BGN, TGFB3, DCN, LXN, BNIP3L, ERRFI1, CSRP2, DPYSL4, PNRC1, AKAP12, TMEM45A, IGFBP3, MT2A, CXCR4, KLF7, SERPINE1, DUSP1, F3, NR3C1, PLIN2, SLC2A5, SDC2, CITED2, IDS, COL5A1, SLC2A3, PLAUR, PAM, KDELR3, WSB1, CDKN1A, PGM2, TPBG, VLDLR, PIM1, PPP1R3C, RBPJ, XPNPEP1, TNFAIP3, ZFP36, BCAN, HAS1, MYH9, FOSL2, HK2, FOS, PDK1, HDLBP	Up-regulated
10	MYOGENESIS_up	0.000662252	0.00202815	0.34144	1.70226	1	197	COL6A3, LAMA2, APOD, FABP3, COL3A1, SPARC, MEF2A, TAGLN, CLU, IGFBP3, ITGB1, PKIA, PTGIS, CRYAB, CNN3, SSPN, AEBP1, COL1A1, WWTR1, SIRT2, PC, GNAO1, COL6A2, HSPB8, SGCA, IGFBP7, MYH11, CSRP3, MRAS, CDKN1A, KCNH2, FST, EIF4A2, ACTA1, AK1, MYH1, ITGB4, FLII, LDB3, ADAM12, GABARAPL2, PPP1R3C, TNNC2, MYO1C, ITGB5, MYH9, AKT2, PVALB, HDAC5, TNNC1, PTP4A3, PLXNB2, GSN, APP, FGF2	Up-regulated
11	INTERFERON_GAMMA_RESPONSE_up	0.000660502	0.00202815	0.333245	1.65986	1	196	PLA2G4A, CD74, SP110, C1S, HIF1A, C1R, VCAM1, MT2A, ADAR, CFH, SLAMF7, HLA-DQA1, CASP4, SSPN, GCH1, TRIM26, EIF2AK2, TNFAIP6, JAK2, SAMHD1, IRF4, BST2, FGL2, IRF5, IFNAR2, CDKN1A, PTPN6, VAMP5, CXCL11, STAT3, PIM1, TRIM21, NFKBIA, MVP, IFIT1, IFIH1, EIF4E3, MX1, UBE2L6, TNFAIP3, SERPING1, IL10RA, ICAM1, SAMD9L, SOD2, STAT4, AUTS2, CMKLR1, ARID5B, CMPK2, HLA-DRB1, TXNIP, SLC25A28, IFITM2, ZBP1, B2…	Up-regulated
13	KRAS_SIGNALING_up	0.000995685	0.00271048	0.312704	1.55941	2	198	PRRX1, SCG5, ITGBL1, APOD, GFPT2, LY96, INHBA, ID2, ETV1, DCBLD2, LAPTM5, AKAP12, NRP1, SPARCL1, IGFBP3, C3AR1, CXCR4, KCNN4, MMP9, CFH, GNG11, PTPRR, PRDM1, ADGRL4, GYPC, CPE, ANO1, EMP1, LCP1, RBP4, ENG, PLAUR, SPON1, MTMR10	Up-regulated
14	APICAL_JUNCTION_up	0.00232558	0.00569767	0.303204	1.50654	6	194	GNAI2, LAYN, IKBKG, THY1, FBN1, VCAN, PPP2R2C, PTPRC, VCAM1, TRO, ITGB1, MMP9, ARHGEF6, INPPL1, CERCAM, MMP2, YWHAH, COL17A1, SKAP2, NEXN, MDK, CALB2, ADAM9, NRAP, ZYX, CADM3, KCNH2, ACTA1, CD99, DSC3, ITGB4, ACTB, SHROOM2, MYL9, PECAM1, ICAM1, CDH6, ACTN1, WASL, TMEM8B, MPZL2, MYH9, AKT2, FLNC, CLDN11, CX3CL1, EVL, VCL, ACTG1, CD34, JAM3, PARD6G, HRAS, LDLRAP1, PIK3CB, LIMA1, MVD, B4GALT1, COL16…	Up-regulated
15	APOPTOSIS_up	0.00407779	0.00908235	0.308506	1.49024	12	158	BGN, DCN, LUM, PLPPR4, TIMP1, SMAD7, BNIP3L, GPX1, CLU, CREBBP, TGFB2, DPYD, CASP4, GCH1, LEF1, RETSAT, EMP1, PPT1, MMP2, RARA, ANXA1, CYLD, PDCD4, CDKN1A, AVPR1A, FDXR, SLC20A1, SOD2, BID, PDGFRB, IL1A, GSN, TXNIP, CCND1, CDK2, APP, PEA15, IGFBP6, TIMP3, EGR3	Up-regulated
16	ANDROGEN_RESPONSE_up	0.0134869	0.0264344	0.323563	1.4474	47	97	BMPR1B, PIAS1, PLPP1, AKAP12, PDLIM5, SEC24D, SRF, ELOVL5, ADAMTS1, ITGAV, CDC14B, MAF, SRP19, STEAP4, PGM3, GNAI3, DNAJB9, UBE2J1, IQGAP2, PMEPA1	Up-regulated
17	ALLOGRAFT_REJECTION_up	0.00494723	0.0105397	0.290428	1.44302	14	193	THY1, TIMP1, INHBA, CD74, IGSF6, CD28, PTPRC, HIF1A, HLA-DOA, HLA-DRA, BCAT1, MMP9, TGFB2, IKBKB, HLA-DQA1, SIT1, HLA-DMB, CD96, IFNG, DEGS1, IFNGR2, FLNA, SOCS5, SPI1, DYRK3, JAK2, IRF4, IFNAR2, GPR65, CFP, PTPN6, CCR1, SRGN, CRTAM, HCLS1, ICAM1, TLR3, STAT4, CCR5, HLA-E, GBP2, FCGR2B	Up-regulated
18	IL2_STAT5_SIGNALING_up	0.0132538	0.0264344	0.272644	1.35605	39	195	CDC42SE2, SWAP70, COL6A1, PLPP1, GABARAPL1, NRP1, TLR7, LRRC8C, PLIN2, ALCAM, ITGAV, GPR83, CD48, EMP1, SOCS2, ECM1, FAM126B, SLC2A3, XBP1, AHR, IRF4, FGL2, GPR65, SNX9, HUWE1, ST3GAL4, TNFRSF18, MYO1E, PIM1, PLEC, CCR4, NT5E, ADAM19, TNFSF11, IL1RL1, BMPR2, MYO1C, IL10RA, PENK, CD83, WLS	Up-regulated
19	FATTY_ACID_METABOLISM_up	0.0144096	0.0271566	-0.314427	-1.40292	97	156	FABP1, PPARA, ACSL5, ACSM3, APEX1, HSPH1, RDH11, CBR1, HSDL2, SUCLG2, FASN, ADH1C, HMGCS2, HMGCS1, ACAT2, CPT1A, CYP1A1, NTHL1, NSDHL, HMGCL, IDH3B, AADAT, REEP6, PDHA1, ALDH3A2, CCDC58, GPD2, MLYCD, SDHD, ENO2, ODC1, AQP7, HCCS, PCBD1, IDH3G, SMS, CYP4A11, HSD17B4, CPOX	Down-regulated
20	ESTROGEN_RESPONSE_LATE_up	0.00200458	0.00516971	-0.334001	-1.53547	13	195	AGR2, TFF3, SORD, GINS2, KIF20A, WFS1, XRCC3, CDC6, ST14, PLK4, HSPA4L, IMPA2, CHPT1, FABP5, TOP2A, SLC29A1, TFF1, OPN3, TRIM29, RBBP8, FGFR3, FRK, HMGCS2, OVOL2, SLC1A4, DHCR7, ASS1, BATF, SLC7A5, PDZK1, UNC13B, ALDH3A2, CELSR2, COX6C, IL17RB, FDFT1, CA12, GJB3, SLC16A1, TH, FAM102A, KRT13, SCARB1, CDH1, CALCR, GPER1, CAV1, NMU, FARP1, PAPSS2, STIL, ABHD2, SNX10	Down-regulated
21	UNFOLDED_PROTEIN_RESPONSE_up	0.000921234	0.00265532	-0.400351	-1.68888	5	108	CKS1B, WFS1, DKC1, EIF4E, NOLC1, ZBTB17, PARN, ALDH18A1, IMP3, SLC1A4, MTHFD2, CEBPG, NHP2, SLC7A5, EXOSC4, FUS, PREB, YWHAZ, PSAT1, EIF4A3, BAG3, IGFBP1, NOP14, NOP56, DDX10, ATF3, CHAC1, HSPA9, VEGFA, KHSRP, DDIT4, EIF2AK3, TATDN2	Down-regulated
22	MTORC1_SIGNALING_up	0.000143184	0.00125182	-0.378016	-1.73781	0	195	CYB5B, TMEM97, SORD, PLK1, EGLN3, HSPE1, GOT1, PPA1, GGA2, UCHL5, IFRD1, PSMG1, ELOVL6, PSMB5, RDH11, PNP, GMPS, BUB1, SC5D, POLR3G, HMGCS1, HSPD1, SLC1A4, MTHFD2, QDPR, DHCR7, TXNRD1, SLC7A5, SCD, DDIT3, P4HA1, PSAT1, EIF2S2, GPI, NFKBIB, STIP1, CCNF, EEF1E1, NUFIP1, HSPA9, TPI1, PSMD13, HMGCR, DHFR, SRD5A1, INSIG1, AURKA, MLLT11, UNG, PSMD14, FADS2, EBP, DDIT4, SDF2L1, UFM1, IDH1, CCT6A, ETF1, …	Down-regulated
23	OXIDATIVE_PHOSPHORYLATION_up	0.00014455	0.00125182	-0.394513	-1.79643	0	183	CYCS, NDUFAB1, UQCRH, NDUFA5, COX15, LRPPRC, GLUD1, CYC1, IDH3A, PRDX3, COX5A, MTRR, SDHB, ETFA, COX7A2, NDUFA9, NDUFB2, ATP6V1H, CPT1A, CYB5A, SLC25A3, AIFM1, NDUFA1, MRPL11, IDH3B, PDHA1, GPI, NDUFA4, UQCRB, COX6C, MRPL34, LDHB, SDHD, TIMM17A, HSPA9, HCCS, COX11, COX5B, OAT, PHYH, NDUFS6, SLC25A5, IDH3G, CS, BCKDHA, GOT2, GRPEL1, UQCRQ, IDH1, ATP1B1, SUPV3L1, RHOT2, COX10, COX6A1, NDUFS3, TIMM9…	Down-regulated
24	MYC_TARGETS_V2_up	0.000161708	0.00125182	-0.613404	-2.30881	0	57	TMEM97, NOP16, SORD, DCTPP1, CBX3, PLK1, PLK4, HSPE1, RRP12, WDR43, NOLC1, RABEPK, GNL3, GRWD1, HSPD1, UTP20, NOP56, NDUFAF4, UNG, MYBBP1A, AIMP2, NIP7, PHB, SUPV3L1, PUS1, SLC29A2, RRP9, FARSA	Down-regulated
25	G2M_CHECKPOINT_up	0.000144113	0.00125182	-0.524984	-2.4001	0	189	TPX2, SLC12A2, SLC38A1, CENPF, SLC7A1, GINS2, GSPT1, PRC1, MKI67, EXO1, CKS1B, LBR, TMPO, CKS2, PLK1, PTTG1, CDC6, DKC1, UBE2C, SRSF2, PLK4, KIF15, SMARCC1, TFDP1, CDKN3, AMD1, EZH2, SMC2, E2F3, TOP2A, BRCA2, MYBL2, NOLC1, TROAP, DTYMK, BUB1, BCL3, MCM3, RAD54L, TTK, POLQ, ORC5, AURKB, KIF20B, CDKN2C, TRAIP, KPNA2, SLC7A5, MTF2, KIF4A, CCNA2, KIF23, RPS6KA5, CUL1, BARD1, ODC1, STMN1, CCNF, CTCF, …	Down-regulated
26	E2F_TARGETS_up	0.000143021	0.00125182	-0.529459	-2.43346	0	194	EXOSC8, MELK, GSPT1, MKI67, POLD2, CKS1B, LBR, TMPO, TIPIN, CKS2, DCTPP1, UBE2T, PLK1, PTTG1, SRSF2, SMC3, PLK4, RAD51AP1, CDKN3, EZH2, BRCA1, MLH1, TOP2A, NCAPD2, E2F8, CSE1L, BRCA2, MYBL2, NOLC1, SLBP, ZW10, CDCA8, NME1, SNRPB, DIAPH3, MCM3, AURKB, HELLS, CDKN2C, MTHFD2, CDKN2A, NUP153, KPNA2, TK1, PRKDC, KIF4A, PCNA, RBBP7, LYAR, RPA3, TRIP13, BARD1, NOP56, STMN1, CTCF, CCP110, PRIM2, POLE, MX…	Down-regulated
27	MYC_TARGETS_V1_up	0.000143021	0.00125182	-0.560212	-2.5748	0	194	NOP16, DDX21, NDUFAB1, GSPT1, POLD2, RRM1, CBX3, RNPS1, SRSF2, SF3B3, HSPE1, MRPS18B, EIF4E, SMARCC1, TFDP1, CYC1, PSMA6, IFRD1, PRDX3, APEX1, ABCE1, COX5A, LSM7, SERBP1, PPM1G, NOLC1, FBL, GNL3, SNRPB2, TRIM28, U2AF1, NME1, PSMD7, PSMD8, PSMB3, RFC4, GLO1, HSPD1, EIF4G2, NHP2, SLC25A3, KPNA2, SRSF7, CCT2, HDAC2, PCNA, CCNA2, EIF2S2, EIF4H, IMPDH2, SNRPG, CUL1, NOP56, CSTF2, ODC1, C1QBP, LSM2, PA…	Down-regulated

## Sheet: CTMU_H
	pathway	pval	padj	ES	NES	nMoreExtreme	size	leadingEdge	Enrichment
1	EPITHELIAL_MESENCHYMAL_TRANSITION_up	0.000161005	0.000646831	0.748088	3.43418	0	197	INHBA, BGN, GREM1, FBLN5, MYLK, SFRP4, MMP2, COL12A1, THBS2, ACTA2, LGALS1, DCN, TIMP3, SPARC, MYL9, ADAM12, NID2, FAP, LUM, PRRX1, SPP1, CTHRC1, BASP1, CALD1, THBS1, COL3A1, FLNA, ITGA5, POSTN, COL5A1, ITGAV, COL6A2, VEGFC, VCAN, EFEMP2, COL11A1, COL1A2, MXRA5, TAGLN, FN1, LRRC15, COL6A3, LOXL1, RGS4, FERMT2, FBN1, IGFBP4, LOX, IL6, PTHLH, VIM, MMP1, TIMP1, CDH11, HTRA1, FSTL1, GAS1, GJA1, COL1A…	Up-regulated
2	INFLAMMATORY_RESPONSE_up	0.000160668	0.000646831	0.541986	2.49172	0	199	INHBA, PCDH7, TNFAIP6, CCL22, ITGA5, FPR1, IL6, MSR1, BDKRB1, DCBLD2, TIMP1, STAB1, ABCA1, IRAK2, CLEC5A, PDPN, CALCRL, OSMR, PROK2, HIF1A, IL1R1, ACVR2A, RGS16, BST2, C5AR1, IL7R, CSF1, MEFV, IL4R, AXL, CCL5, RNF144B, GP1BA, OLR1, TAPBP, EMP3, IFNAR1, SERPINE1, IL10RA, TLR1, IL12B, SEMA4D, PIK3R5, SCARF1, APLNR, ADM, CD69, ICAM4, GABBR1, VIP, MXD1, SPHK1, TNFSF10, NFKBIA, CYBB, LPAR1, BEST1, CD1…	Up-regulated
3	COAGULATION_up	0.000167983	0.000646831	0.55542	2.42094	0	138	MMP2, TIMP3, SPARC, CPQ, CTSK, THBS1, C1S, FN1, FBN1, C3, MMP1, TIMP1, KLF7, PECAM1, HTRA1, C1R, A2M, CFI, CTSB, GP9, APOC1, PEF1, MMP3, PLAU, GP1BA, OLR1, SERPINE1, ANXA1, PDGFB, FYN, LRP1, CSRP1, LGMN, MMP7, APOC3, GSN, MMP9, MMP8, PROS1, APOC2, C1QA, DUSP14, SERPINA1, APOA1, TF, PREP, F10, F8, MMP14, CFH, ISCU	Up-regulated
4	TNFA_SIGNALING_VIA_NFKB_up	0.000160979	0.000646831	0.513882	2.36044	0	198	INHBA, TNFAIP6, MAP3K8, SLC2A3, IL6, EGR2, EGR1, ABCA1, DRAM1, GFPT2, PNRC1, TNFAIP3, RHOB, IL7R, ACKR3, CSF1, SOD2, CD83, SGK1, DUSP1, CCL5, PLAU, PDLIM5, BCL2A1, OLR1, PLPP3, MCL1, KLF9, GEM, EHD1, RCAN1, NFE2L2, JUNB, SERPINE1, NFKBIE, DNAJB4, IL12B, FOSB, CD69, IL6ST, KLF10, MXD1, SPHK1, PPP1R15A, NFKBIA, LITAF, NFAT5, IER3, TNC, ZBTB10, TANK, BHLHE40, KYNU, NR4A3, CXCL2, CFLAR, SPSB1, PTGER4…	Up-regulated
5	COMPLEMENT_up	0.000160979	0.000646831	0.507176	2.32963	0	198	CPQ, ZEB1, DOCK10, C1S, FN1, GNG2, C3, IL6, TIMP1, GZMK, C1R, FCER1G, S100A9, GNAI2, CTSB, F7, TNFAIP3, GP9, ANXA5, APOC1, USP15, DGKH, PRCP, CCL5, GP1BA, OLR1, APOBEC3F, CR1, EHD1, SERPINE1, IRF2, PDGFB, LTF, MMP13, PIK3R5, FYN, LRP1, S100A12, CSRP1, WAS, PSMB9, CTSD, LGMN, ITGAM, CTSS, CBLB, SH2B3, MMP8, CTSL, GNB4, AKAP10, KYNU, GATA3, C1QA, JAK2, SERPINA1, GNGT2, GCA, PREP, F10, CD59, F8, MMP…	Up-regulated
7	UV_RESPONSE_dn	0.000167757	0.000646831	0.519358	2.26668	0	139	FBLN5, NRP1, RBPMS, COL3A1, COL11A1, CAV1, COL1A2, AKT3, RGS4, SDC2, GJA1, COL1A1, PTPRM, IGFBP5, RUNX1, KALRN, ACVR2A, NR3C1, DLC1, SNAI2, COL5A2, KCNMA1, EFEMP1, FHL2, PMP22, ATXN1, DUSP1, PTPN21, PDLIM5, PLPP3, SMAD7, SERPINE1, PDGFRB, SIPA1L1, FYN, ATP2B4, CITED2, LTBP1, DAB2, LPAR1, ATRX, BHLHE40, ADGRL2, ARHGEF9, SCAF8	Up-regulated
8	HYPOXIA_up	0.000161577	0.000646831	0.487135	2.23145	0	193	BGN, AKAP12, TGFB3, DCN, SLC2A3, COL5A1, CAV1, LXN, LOX, CHST3, IL6, SDC2, KLF7, PNRC1, NR3C1, TNFAIP3, HMOX1, ACKR3, PAM, WSB1, CSRP2, MT2A, DUSP1, ERRFI1, IGFBP3, SLC6A6, CDKN1C, PPP1R3C, SERPINE1, PDGFB, TMEM45A, MYH9, ADM, SRPX, PPP1R15A, PGK1, HK1, PLIN2, CITED2, SIAH2, IER3, BHLHE40, KIF5A, TGFBI, FBP1, BNIP3L, STC1, EXT1, PGAM2, CXCR4, SAP30, TGM2	Up-regulated
9	MYOGENESIS_up	0.000161005	0.000646831	0.480461	2.20561	0	197	MYLK, MRAS, SPARC, ADAM12, CRYAB, COL3A1, SLN, PTGIS, COL6A2, COL15A1, TAGLN, COL6A3, AEBP1, SSPN, WWTR1, COL1A1, SGCD, CNN3, PTP4A3, GJA5, MEF2C, LAMA2, COX7A1, PDLIM7, FOXO4, TGFB1, IGFBP3, SVIL, PPP1R3C, BAG1, MYH9, HDAC5, MYLPF, APLNR, ACSL1, NAV2, AGRN, SPHK1, EFS, BDKRB2, GSN, CKMT2, MYL6B, FXYD1, MEF2D, HSPB8, FABP3, BHLHE40, ITGB5, FGF2, SPEG, APP, PGAM2, RYR1, CHRNA1, TPM2, NOS1, SORBS1,…	Up-regulated
10	ALLOGRAFT_REJECTION_up	0.000161577	0.000646831	0.478008	2.18964	0	193	INHBA, CCL22, FLNA, FCGR2B, SRGN, DYRK3, IL6, BCAT1, CCND3, TIMP1, STAB1, HIF1A, GPR65, SPI1, HLA-DRA, ACVR2A, THY1, TLR6, CSF1, KLRD1, TGFB1, IL4R, CCL5, TAPBP, F2R, HLA-DMB, PRKCG, CD28, SOCS5, APBB1, TLR1, CCL11, IL12B, PTPRC, ST8SIA4, CD96, CD86, CD8A, WAS, PTPN6, CD74, CTSS, MMP9, CXCR3, HCLS1, JAK2, IL16, IL2RA, ZAP70, DEGS1, HLA-DOA, CD247, HLA-DOB, NCF4, KRT1, ITGB2, UBE2N, TRAT1, CXCL13,…	Up-regulated
11	APOPTOSIS_up	0.00016518	0.000646831	0.436079	1.94236	0	158	BGN, MMP2, DCN, TIMP3, LUM, DPYD, CAV1, PLPPR4, IL6, TIMP1, CASP8, PEA15, HMOX1, RHOB, SOD2, MCL1, F2R, SMAD7, AVPR1A, LEF1, ANXA1, PDGFRB, CYLD, BCAP31, IGFBP6, CD69, IFITM3, HSPB1, FEZ1, TNFSF10, IER3, GSN, TNFRSF12A, GPX1, CD14, BNIP3L, CFLAR, APP, GCH1, HGF, GADD45B, BAX, GADD45A, IGF2R, TGFB2, DIABLO, RARA, SLC20A1, CASP4, TXNIP, SPTAN1, AIFM3, MGMT	Up-regulated
12	APICAL_JUNCTION_up	0.000161603	0.000646831	0.41849	1.91767	0	194	MMP2, MYL9, NEXN, VCAN, AKT3, JAM3, FBN1, LAYN, CDH11, PECAM1, GNAI2, ADAMTS5, RRAS, THY1, SLIT2, GAMT, SGCE, SHC1, EVL, CLDN11, PARD6G, TNFRSF11B, NF1, CD99, MYH9, PTPRC, HRAS, VCL, CDH4, PARVA, MYH10, CD86, ICAM4, KRT31, CLDN19, MPZL1, MMP9, WNK4, IKBKG, ADRA1B, AMIGO2, EXOC4, DSC3, PCDH1, TGFBI, ALOX15B, SPEG	Up-regulated
13	INTERFERON_GAMMA_RESPONSE_up	0.000160979	0.000646831	0.412944	1.8951	0	196	TNFAIP6, C1S, FPR1, SSPN, IL6, C1R, HIF1A, CASP8, FCGR1A, IFITM2, BST2, TNFAIP3, CIITA, SOD2, MT2A, NOD1, IL4R, BANK1, OGFR, CCL5, LYSMD2, TAPBP, HLA-DRB1, IRF2, IL10RA, ADAR, MX2, ST8SIA4, SAMHD1, CD69, IFITM3, CD86, TNFSF10, NFKBIA, PTPN6, PSMB9, NCOA3, CD74, RIPK1, P2RY14, VAMP5, JAK2, OAS2, SLC25A28, UPP1, GCH1, ARID5B, RNF31, CFH, CXCL10, CMKLR1, LATS2, ZBP1, SECTM1, LY6E, SOCS3, IFI44, PML,…	Up-regulated
14	TGF_BETA_SIGNALING_up	0.000539665	0.00125922	0.505049	1.88034	2	54	THBS1, ACVR1, RAB31, WWTR1, SMURF2, TGFB1, CDKN1C, SMAD7, JUNB, SERPINE1, BCAR3, KLF10, PPP1R15A, FKBP1A, SKI, BMPR2, SKIL, LTBP2, CDK9, MAP3K7, RHOA, SLC20A1, APC, ARID4B, LEFTY2	Up-regulated
15	IL6_JAK_STAT3_SIGNALING_up	0.000174186	0.000646831	0.452274	1.8344	0	87	MAP3K8, IL6, OSMR, A2M, IL1R1, IL17RA, PDGFC, HMOX1, CSF1, TGFB1, IL4R, IFNAR1, CNTFR, PIK3R5, IL6ST, TNFRSF12A, CD14, IL18R1, IL2RA, LEPR, CXCL10, GRB2, DNTT, CXCL13, SOCS3	Up-regulated
16	KRAS_SIGNALING_up	0.000321958	0.000789813	0.38739	1.77942	1	198	INHBA, AKAP12, NRP1, PRRX1, SPP1, ITGBL1, LAPTM5, SPARCL1, DCBLD2, PECAM1, IGF2, FCER1G, GFPT2, LY96, TLR8, RGS16, TNFAIP3, ADGRL4, GYPC, IL7R, PCP4, GPRC5B, ETV1, F13A1, IGFBP3, PLAU, ETV5, GNG11, PRDM1, IL10RA, MAFB, ADGRA2, EPB41L3, PPP1R15A, GPNMB, MMD, CTSS, ADAM17, MMP9, PEG3, PRKG2, CXCR4, PDCD1LG2, CD37, WNT7A, SNAP91, PCSK1N, SCG5, TMEM176A, CFH, CXCL10, CMKLR1, NAP1L2, SPON1, CLEC4A, IT…	Up-regulated
17	IL2_STAT5_SIGNALING_up	0.000322373	0.000789813	0.385143	1.76646	1	195	MAP3K8, NRP1, SPP1, SLC2A3, ITGAV, COL6A1, GABARAPL1, CCND3, PHTF2, GPR65, RGS16, ADAM19, RHOB, GLIPR2, CSF1, CD83, IL4R, LRRC8C, CDKN1C, NCS1, IL10RA, CD81, SWAP70, ICOS, IFITM3, CD86, CCR4, MXD1, TLR7, TNFSF10, IL1RL1, PLIN2, BATF3, NCOA3, ENPP1, IL18R1, BHLHE40, SHE, SYT11, BMPR2, CAPN3, PRKCH, CDC42SE2, ECM1, MYO1E, MAP6, AHNAK, TGM2, NFKBIZ, IL2RA	Up-regulated
18	HEDGEHOG_SIGNALING_up	0.00443541	0.0086934	0.506432	1.72409	23	36	NRP1, NRP2, CRMP1, DPYSL2, THY1, NF1, MYH9, CNTFR, RTN1, L1CAM, TLE3, HEY2, PLG, SCG2, PML, SHH	Up-regulated
19	NOTCH_SIGNALING_up	0.00635039	0.011968	0.517253	1.71326	33	32	FZD7, WNT5A, FBXW11, MAML2, NOTCH3, ST3GAL6, SAP30, PPARD, SKP1, RBX1, FZD1, TCF7L2, JAG1	Up-regulated
20	APICAL_SURFACE_up	0.0235294	0.0384314	0.430892	1.53261	129	43	DCBLD2, GAS1, THY1, SULF2, EFNA5, CD160, HSPB1, SRPX, FLOT2, GATA3, APP, GSTM3, SHROOM2, SCUBE1, LYN, IL2RB, TMEM8B, SLC2A4, SLC22A12, ADAM10, RHCG, GHRL, B4GALT1	Up-regulated
21	KRAS_SIGNALING_dn	0.00290135	0.0059236	0.33293	1.52699	17	195	COPZ2, BMPR1B, IGFBP2, NTF3, TSHB, GAMT, MEFV, SLC29A3, FGF16, SGK1, KLK7, IRS4, ITIH3, GP1BA, KCNMB1, IL12B, CNTFR, CAMK1D, GTF3C5, TG, SLC25A23, GPR19, RYR2, FSHB, ENTPD7, SLC12A3, CYP39A1, PAX3, TENM2, WNT16, CALCB, RYR1, LGALS7, SKIL, NOS1, PCDHB1, CLPS, INSL5, KRT1, KCNN1, EDN1, TGFB2, GP2, MAGIX, KMT2D, SCGB1A1, SLC6A3, FGFR3, CDH16, COL2A1, HNF1A, PRODH, PLAG1, ACTC1, GDNF, ALOX12B, GRID2,…	Up-regulated
23	ESTROGEN_RESPONSE_LATE_up	0.00921538	0.0161269	-0.288057	-1.3904	34	195	MYB, SLC16A1, XRCC3, SORD, TSPAN13, AGR2, TOP2A, TPD52L1, TOB1, TFF1, CDH1, STIL, FRK, ASS1, HR, FABP5, COX6C, CXCL14, GPER1, LSR, NMU, ID2, HMGCS2, MEST, GINS2, SLC29A1, KCNK5, RBBP8, CHST8, SLC22A5, CISH, CDC20, SEMA3B, PRLR, DYNLT3, CD9, UGDH, ST14, DHRS2, HPRT1, PERP, IMPA2, CDC6, SULT2B1, GALE, EMP2, SLC27A2, TJP3, ACOX2, HSPA4L, PLXNB1, ISG20, FOS, PLK4, FDFT1, KIF20A, TST, CLIC3, METTL3, P…	Down-regulated
24	SPERMATOGENESIS_up	0.00738734	0.0134067	-0.321939	-1.46983	29	133	CFTR, EZH2, CSNK2A2, STRBP, PHKG2, PSMG1, ART3, TTK, SLC12A2, CCNB2, TALDO1, BUB1, ACRV1, DMC1, HBZ, CLPB, AURKA, TNP1, MTNR1A, DDX4, CST8, ACRBP, DPEP3, GMCL1, MAP7, PDHA2, DBF4, THEG, KIF2C, VDAC3, AGFG1, AKAP4, HSPA4L, GRM8, DCC, STAM2, CDK1, PIAS2, MEP1B, TEKT2, RFC4, PARP2, TNP2, CLGN	Down-regulated
25	FATTY_ACID_METABOLISM_up	0.00254518	0.00542233	-0.327578	-1.53312	9	156	FABP1, MAOA, IDI1, ME1, ACSL5, ODC1, ACSM3, DECR1, CBR1, CCDC58, HMGCS1, MGLL, NSDHL, PPARA, HPGD, AADAT, RAP1GDS1, ALAD, HMGCS2, FH, SMS, EHHADH, SDHD, FABP2, S100A10, ERP29, PDHB, SLC22A5, ALDH9A1, IDH3G, D2HGDH, UGDH, CYP1A1, FASN, ADH1C, PRDX6, HSDL2, APEX1, ENO2, MDH1, GPD2, ECHS1, ACOX1, HADH, CIDEA, HSD17B10, PDHA1, GRHPR, PCBD1, FMO1, ALDH3A1, IDH3B, ECH1, CD36, UBE2L6, IDH1	Down-regulated
26	MYC_TARGETS_V2_up	0.00090151	0.00200791	-0.465628	-1.82816	3	57	TMEM97, SORD, UTP20, PLK1, RRP9, MYBBP1A, DCTPP1, NDUFAF4, HSPE1, PES1, PA2G4, MRTO4, NOP16, MYC, SLC29A2, TFB2M, NOP56, WDR74, PLK4	Down-regulated
27	G2M_CHECKPOINT_up	0.000259538	0.000713745	-0.385465	-1.85196	0	189	KIF20B, KPNB1, PTTG1, TOP2A, BRCA2, NUSAP1, SLC38A1, EZH2, ODC1, STIL, PLK1, PRIM2, SMC4, KIF11, CKS2, TTK, TPX2, HMMR, RBL1, SLC12A2, CKS1B, CCNB2, STMN1, BUB1, CUL3, GINS2, AURKA, PTTG3P, GSPT1, DKC1, ESPL1, UBE2S, PDS5B, MYBL2, LBR, ORC5, CCNT1, WRN, KPNA2, CDC20, AMD1, MAD2L1, CENPF, CCNA2, HMGA1, MYC, DMD, DBF4, KIF2C, MKI67, TROAP, CHEK1, CUL4A, POLA2, CDC6, SYNCRIP, CDC7, SRSF10, TFDP1, MC…	Down-regulated
28	OXIDATIVE_PHOSPHORYLATION_up	0.000259202	0.000713745	-0.418476	-2.00074	0	183	DECR1, MRPS22, MRPL11, CS, CYB5A, COX6C, MRPS30, COX8A, SLC25A3, CYCS, COX7B, GRPEL1, FH, UQCRQ, COX11, SDHD, UQCRH, PDHB, SLC25A12, PHB2, OPA1, NDUFV2, COX15, NDUFB2, ALDH6A1, ALAS1, UQCR11, NDUFA2, ACADSB, IDH3G, NDUFA7, COX7A2L, COX4I1, COX10, SLC25A4, UQCR10, MAOB, VDAC3, NDUFA1, MRPL35, SDHB, OXA1L, TIMM10, AIFM1, CYC1, NDUFC1, NDUFS2, MDH1, ECHS1, COX7C, OGDH, VDAC2, NQO2, HSD17B10, NDUFB1,…	Down-regulated
29	E2F_TARGETS_up	0.000262192	0.000713745	-0.472161	-2.27716	0	194	E2F8, PTTG1, TOP2A, CCNE1, BRCA2, NUDT21, RAD51AP1, EZH2, PLK1, PRIM2, CSE1L, SMC4, CKS2, MSH2, HMMR, PAICS, SSRP1, CKS1B, CCNB2, STMN1, RPA3, SNRPB, EIF2S1, TIPIN, DCTPP1, POLE4, AURKA, UBE2T, GSPT1, HMGB2, ASF1B, CIT, RFC2, ESPL1, UBE2S, TFRC, PDS5B, CDCA8, MYBL2, LBR, PA2G4, KPNA2, CDKN2A, CDC20, ATAD2, PMS2, MAD2L1, RRM2, PNN, PHF5A, SMC3, LYAR, HMGA1, PAN2, MYC, PCNA, CENPM, DLGAP5, GINS3, D…	Down-regulated
30	MYC_TARGETS_V1_up	0.000262192	0.000713745	-0.480276	-2.3163	0	194	KPNB1, RPL18, RPS5, FBL, RNPS1, ODC1, RSL1D1, GLO1, RRP9, LSM7, SNRPD2, TRIM28, SSBP1, IMPDH2, SLC25A3, EIF2S1, HSPE1, CCT5, RPLP0, C1QBP, SSB, GSPT1, CLNS1A, RPS3, TXNL4A, PWP1, PHB2, PPIA, EIF3J, PA2G4, RPL14, KPNA2, AP3S1, CDC20, CCT7, RPS10, MAD2L1, IFRD1, NOP16, SNRPA, CCNA2, EXOSC7, PSMA7, ABCE1, MYC, CCT4, PCNA, SNRPG, NCBP1, HNRNPA1, CCT3, TUFM, DDX21, VDAC3, EIF3D, APEX1, CYC1, HPRT1, NM…	Down-regulated

## Sheet: DESE_H
	pathway	pval	padj	ES	NES	nMoreExtreme	size	leadingEdge	Enrichment
1	MYC_TARGETS_V1_up	0.000146413	0.000677835	0.692939	3.16858	0	194	CCNA2, RRM1, HSPE1, PGK1, COX5A, VBP1, PCNA, CYC1, CDC20, ILF2, RFC4, RSL1D1, EIF1AX, USP1, GSPT1, RPL18, TFDP1, PRDX3, ABCE1, SLC25A3, AIMP2, CANX, NOLC1, CLNS1A, RPS5, PPIA, RPLP0, C1QBP, HNRNPA1, NDUFAB1, FBL, NOP56, PSMA2, VDAC1, NPM1, PHB, EIF4A1, DEK, PSMA4, SNRPG, SNRPD2, ODC1, RPL14, APEX1, CBX3, RPS2, RPL6, HSP90AB1, RANBP1, ERH, GOT2, STARD7, SSBP1, RRP9, MAD2L1, KPNA2, RAN, UBA2, SSB, …	Up-regulated
2	E2F_TARGETS_up	0.000146413	0.000677835	0.623534	2.85121	0	194	CDKN3, TOP2A, PRIM2, PCNA, CDCA8, HMGB3, CDC20, RPA3, MCM3, RAD51C, PAICS, PLK4, USP1, GSPT1, E2F8, PLK1, CDC25B, DCLRE1B, CSE1L, TRIP13, ATAD2, UBE2T, STMN1, CDK1, NOLC1, SSRP1, TMPO, GINS1, CKS2, RAD51AP1, TIPIN, NCAPD2, NBN, EZH2, NOP56, CKS1B, MELK, DEK, MKI67, RRM2, POLE4, PPP1R8, ASF1B, ORC6, CCNB2, RANBP1, BRCA1, NASP, MAD2L1, KPNA2, PTTG1, CCP110, RAN, PRPS1, LYAR, NUDT21, MYBL2, NUP153, …	Up-regulated
3	G2M_CHECKPOINT_up	0.000147145	0.000677835	0.566994	2.58362	0	189	CDKN3, TOP2A, PRIM2, CENPF, CCNA2, KIF15, TTK, HMGB3, CDC20, MCM3, CHAF1A, PLK4, SLC12A2, DKC1, GSPT1, KIF23, TFDP1, PLK1, TPX2, CDC25B, STMN1, CDK1, NOLC1, TMPO, CKS2, CDC27, PBK, AMD1, EZH2, KIF11, CKS1B, CDC6, PRC1, KIF20B, MKI67, SMC2, ODC1, ORC6, CCNB2, DTYMK, POLQ, NASP, MAD2L1, KPNA2, PTTG1, DBF4, NCL, GINS2, RPS6KA5, UBE2C, NUSAP1, RBL1, MYBL2, SLC38A1, SRSF1, BRCA2, MCM2, EXO1, KATNA1, S…	Up-regulated
4	OXIDATIVE_PHOSPHORYLATION_up	0.00014758	0.000677835	0.545578	2.4764	0	183	MRPL11, FXN, COX5A, CYC1, CYCS, NDUFA4, UQCR10, SDHB, PRDX3, NDUFB4, COX7B, ACAA2, SLC25A3, NDUFB5, LRPPRC, IDH1, PDHA1, UQCRH, UQCRQ, MRPS22, NDUFAB1, FH, COX11, NDUFV2, TIMM9, CS, COX6A1, VDAC1, UQCRC2, COX7C, UQCRFS1, COX17, ATP1B1, NDUFB1, IDH3A, COX6C, GOT2, COX7A2L, DLAT, HSPA9, UQCRC1, UQCRB, NDUFB2, NDUFA1, ATP6V1H, COX7A2, SURF1, COX6B1, MRPS30, NDUFA6, UQCR11, NDUFS2, NDUFA9, MRPS11, PM…	Up-regulated
5	MYC_TARGETS_V2_up	0.000166945	0.000677835	0.635469	2.3924	0	57	TFB2M, WDR43, SORD, HSPE1, PLK4, TMEM97, PLK1, AIMP2, NOLC1, NOP56, NPM1, PHB, NIP7, CBX3, RRP9, RABEPK, SLC19A1, NDUFAF4, DCTPP1, UNG, PA2G4, GNL3, DDX18, SLC29A2, MYC, IPO4, HSPD1, UTP20	Up-regulated
6	MTORC1_SIGNALING_up	0.000146391	0.000677835	0.47542	2.17486	0	195	SORD, HSPE1, PGK1, IDI1, TMEM97, PLK1, DHFR, ME1, CANX, IDH1, PSMG1, CALR, CYP51A1, ELOVL6, PPIA, GAPDH, GSR, SLC37A4, PNP, ADD3, PSMA4, RRM2, PRDX1, EEF1E1, GSK3B, RRP9, STIP1, HSPA9, ARPC5L, UCHL5, RPN1, GMPS, PSMB5, CD9, HPRT1, ACACA, PPA1, DHCR24, PNO1, CCNG1, GLRX, GCLC, POLR3G, CCT6A, LTA4H, MCM2, TCEA1, GOT1, SLC7A11, UNG, MTHFD2, LDHA, PSMA3, SYTL2, HMBS, IMMT, INSIG1, ENO1, SC5D, USO1, E…	Up-regulated
7	FATTY_ACID_METABOLISM_up	0.000150512	0.000677835	0.43866	1.94914	0	156	FABP1, CCDC58, IDI1, PCBD1, NSDHL, ME1, ACAA2, HMGCS2, IDH1, PDHA1, HSP90AA1, HSPH1, HADH, NBN, FH, AADAT, FABP2, ODC1, FASN, APEX1, ALDH9A1, ACSL5, ACAT2, VNN1, DHCR24, UROS, GCDH, ALDH1A1, PRDX6, SDHC, LDHA, NTHL1, METAP1, HSD17B7, BCKDHB, MCEE, DECR1, ADH1C, ACADS, DLD, RETSAT, HAO2, ECI2, ECH1, HIBCH, CA6, HSD17B11, CBR1, CBR3, S100A10, ACO2, PDHB, REEP6, YWHAH	Up-regulated
8	UNFOLDED_PROTEIN_RESPONSE_up	0.000157431	0.000677835	0.463226	1.94818	0	108	DKC1, IMP3, NOLC1, CALR, NOP56, CKS1B, PDIA6, NPM1, SPCS1, GEMIN4, EIF4A1, SDAD1, RRP9, CNOT2, HSPA9, CEBPG, GOSR2, SRPRB, EDC4, EXOSC10, EIF4EBP1, POP4, NOP14, PARN, KDELR3, MTHFD2, RPS14, YWHAZ, EXOSC4, DNAJC3, PAIP1, HERPUD1, VEGFA, SLC7A5, TATDN2, DDX10, YIF1A, WFS1, ATF4, EEF2, EIF4G1, ALDH18A1, HSPA5, SSR1, BANF1, IFIT1, CNOT6	Up-regulated
9	PEROXISOME_up	0.000317712	0.000677835	0.429671	1.79481	1	104	TOP2A, IDI1, SCP2, FABP6, SLC27A2, IDH1, CDK7, BCL10, PRDX1, ALDH9A1, ACSL5, UGT2B17, DHCR24, ABCB4, ALDH1A1, NUDT19, ABCD3, PABPC1, HSD11B2, NR1I2, ABCB1, RETSAT, PEX6, HAO2, ECI2, ECH1, SOD1, ABCC8, CACNA1B, HSD17B11, SMARCC1, CTBP1, YWHAH, SLC25A19	Up-regulated
11	GLYCOLYSIS_up	0.000875146	0.00164931	0.346197	1.5873	5	198	PGK1, TXN, TFF3, FAM162A, SLC35A3, NSDHL, ME1, GFPT1, STMN1, CDK1, IL13RA1, IDH1, PPIA, AKR1A1, GLCE, GALK2, PGAM1, SLC37A4, PHKA2, KIF20A, ALDH9A1, GOT2, NASP, SRD5A3, PRPS1, PKP2, ALG1, GLRX, GCLC, PPP2CB, B3GNT3, CLDN3, MET, DSC2, ADORA2B, ABCB6, GOT1, MED24, B3GALT6, SDHC, KDELR3, LDHA, ENO1, GPC3, VEGFA, COG2, TPI1, PYGB, HAX1, CASP6, DLD, PGM2, MIOX, GALE, AK3, SOD1, COPB2, KIF2A, HSPA5, PF…	Up-regulated
12	ESTROGEN_RESPONSE_LATE_up	0.00117113	0.00204948	0.344089	1.57407	7	195	TOP2A, AGR2, SORD, CDC20, TFF3, CDH1, PLK4, CXCL14, TFF1, SLC27A2, MYB, HMGCS2, ASS1, ST14, FRK, CDC6, PERP, ADD3, KIF20A, LSR, TSPAN13, HSPA4L, FDFT1, COX6C, FABP5, ANXA9, GINS2, CD9, HPRT1, XRCC3, OVOL2, SEMA3B, CA12, CYP26B1, TOB1, AMFR, IMPA2, AREG, DHCR7, SLC7A5, KCNK5, CKB, KLF4, ID2, SERPINA1, WFS1, LTF, PPIF, GALE, SLC16A1, SIAH2, TPD52L1, TST, MAPK13, CLIC3, TFAP2C, EMP2, GJB3, ITPK1, HR	Up-regulated
15	KRAS_SIGNALING_dn	0.0179754	0.0284127	-0.271907	-1.34106	56	195	COPZ2, NGB, SYNPO, PDK2, SSTR4, PTPRJ, SHOX2, IFI44L, IDUA, RYR2, COL2A1, CHST2, RSAD2, TGFB2, RGS11, PROP1, KCNMB1, IL12B, SNN, EFHD1, SPHK2, P2RX6, SERPINB2, MAGIX, EDAR, MEFV, ADRA2C, VPREB1, CCDC106, MYH7, UPK3B, CLDN16, GPRC5C, BMPR1B, KRT4, PDE6B, SPRR3, SLC30A3, CALML5, TENM2, CHRNG, EDN1, TCF7L1, IRS4, KCND1, LGALS7, MTHFR, ENTPD7, FGF16, ATP4A, PAX3, SKIL, ARPP21, PDCD1, SLC5A5, IFNG, OX…	Down-regulated
16	APOPTOSIS_up	0.000594354	0.00121347	-0.326624	-1.56603	1	158	DPYD, TIMP1, LUM, ANXA1, BGN, GADD45B, PEA15, CLU, F2R, TIMP3, EGR3, LEF1, DCN, AVPR1A, FDXR, JUN, IGFBP6, MMP2, CAV1, BIRC3, TGFBR3, HGF, SATB1, GPX4, GPX3, F2, FEZ1, TGFB2, GNA15, PSEN2, SMAD7, GSN, DAP, NEDD9, CYLD, BNIP3L, CREBBP, EMP1, RHOB, PTK2, PLPPR4, GADD45A	Down-regulated
17	IL2_STAT5_SIGNALING_up	0.000315358	0.000677835	-0.340454	-1.67914	0	195	COL6A1, PHTF2, SPP1, GLIPR2, IL10RA, RRAGD, GADD45B, SOCS1, NRP1, CD86, CYFIP1, PTH1R, SLC2A3, CTSZ, EOMES, LRIG1, RHOH, NDRG1, MAFF, ADAM19, LRRC8C, TNFRSF9, GABARAPL1, AHNAK, GBP4, DCPS, GPX4, SELL, IGF1R, ALCAM, CD81, MAP6, ECM1, RABGAP1L, SPRY4, TNFRSF1B, ICOS, IL2RA, MYO1E, PRNP, BATF3, GALM, RORA, IRF4, DHRS3, CKAP4, IKZF2, FURIN, EMP1, RHOB, CD83, PLPP1, TGM2, PENK, RGS16, DENND5A, MAP3K8,…	Down-regulated
18	INTERFERON_ALPHA_RESPONSE_up	0.000804505	0.00157683	-0.383091	-1.68953	2	94	LPAR6, BST2, TMEM140, EPSTI1, IFI44L, IFIT2, C1S, CD74, GBP4, SELL, IRF7, SP110, RSAD2, UBA7, SAMD9L, PARP12, ADAR, ISG15, IFI44, IFI35, CXCL11, STAT2, CMPK2	Down-regulated
19	HYPOXIA_up	0.00031506	0.000677835	-0.347682	-1.71064	0	193	AKAP12, TGFB3, COL5A1, LOX, ACKR3, TMEM45A, RRAGD, IGFBP3, BGN, CXCR4, NR3C1, SERPINE1, SLC2A3, DUSP1, DCN, KLF7, JUN, IDS, NDRG1, TES, CHST3, MAFF, SRPX, PNRC1, TNFAIP3, CAV1, LXN, GCK, MT2A, TPBG, MYH9, CHST2, INHA, PAM, HS3ST1	Down-regulated
20	ALLOGRAFT_REJECTION_up	0.00031506	0.000677835	-0.353838	-1.74093	0	193	TIMP1, FLNA, CCL2, MMP9, HLA-DRA, SRGN, IGSF6, SOCS1, SPI1, PTPRC, INHBA, F2R, CCL5, HLA-E, CD86, BCAT1, THY1, LY86, FCGR2B, TAPBP, CRTAM, TLR1, CD74, TLR6, IL16, MAP4K1, F2, IRF7, IL4, TGFB2, ACVR2A, CD7, IL12B, HLA-DQA1, CDKN2A, PTPN6, TRAF2, STAB1, CD247, HCLS1, IFNAR2, CFP, IL2RA, FGR, IRF4, LCK, UBE2D1, CD40, HLA-DMB, CCL7, ZAP70, PSMB10, LYN, HIF1A, PRF1, IL10, GZMA, HLA-DMA, HLA-DOA, STAT4…	Down-regulated
21	APICAL_JUNCTION_up	0.000315259	0.000677835	-0.372449	-1.83377	0	194	MMP9, AKT3, EVL, NLGN2, FBN1, SLIT2, NEXN, CLDN11, VCAN, MYL9, STX4, PTPRC, PECAM1, VAV2, CERCAM, CD86, THY1, CD209, ZYX, CALB2, ADAM23, RRAS, MMP2, ACTB, ARHGEF6, LAYN, CD99, MYH9, PARVA, AMIGO2, RSU1, ALOX15B, CLDN14, FSCN1, TSC1, JAM3, FLNC, VWF, ACTN3, CADM3, SIRPA, SHC1, ICAM2, COL16A1, PKD1, MDK, TIAL1, GTF2F1, CDH11, GNAI1, SPEG, PTK2, MPP5, SLC30A3, LAMC2, NRTN, CNTN1, VCAM1	Down-regulated
22	TNFA_SIGNALING_VIA_NFKB_up	0.000317864	0.000677835	-0.374658	-1.8513	0	198	TNFAIP6, GFPT2, CCL2, ACKR3, GPR183, OLR1, GADD45B, INHBA, CCL5, SERPINE1, DNAJB4, SLC2A3, DUSP1, EGR3, KLF9, JUN, NR4A3, IFIT2, MAFF, DUSP4, TNC, PNRC1, TNFAIP3, TNFRSF9, PDLIM5, EGR2, BIRC3, PLPP3, TSC22D1, IL23A, GEM, TNFAIP8, IL12B, SNN, PLAU, KLF2, NINJ1, SERPINB2, EGR1, KYNU, PFKFB3, LITAF, JUNB, JAG1, CXCL11, SLC2A6, BCL6, SERPINB8, STAT5A, NR4A1, RHOB, PLEK, RCAN1, CD83, SPSB1, PANX1, PTG…	Down-regulated
23	COMPLEMENT_up	0.000317864	0.000677835	-0.375124	-1.8536	0	198	APOC1, TIMP1, ZEB1, FCN1, FN1, OLR1, PIK3R5, CLU, RASGRP1, FCER1G, STX4, PLA2G7, LRP1, CCL5, C3, SERPINE1, GNG2, F10, MAFF, CFB, GATA3, DGKG, CTSB, FYN, C1S, TNFAIP3, C1R, ZFPM2, GNB4, CFH, S100A9, C1QC, CD59, CTSL, F2, MMP14, IRF7, L3MBTL4, APOA4, DOCK10, CSRP1, HPCAL4, CDK5R1, MMP8, SPOCK2, PRSS36, ANXA5, USP8, MSRB1, DOCK9, SERPINB2, KYNU, DOCK4, MMP15, LCK, CBLB, CD36	Down-regulated
24	INFLAMMATORY_RESPONSE_up	0.000318167	0.000677835	-0.378755	-1.87286	0	199	TNFAIP6, GABBR1, TIMP1, PCDH7, CCL2, IL10RA, GPR183, OLR1, BST2, PIK3R5, C3AR1, C5AR1, RASGRP1, DCBLD2, INHBA, ITGA5, CCL5, SERPINE1, EMP3, KCNJ2, TAPBP, TLR1, TNFRSF9, TPBG, CCL17, APLNR, CHST2, SELL, MMP14, IRF7, CD82, SEMA4D, ACVR2A, P2RX7, SLC31A2, FPR1, IL12B, MSR1, GNA15, CMKLR1, STAB1, IL1R1, TNFRSF1B, AQP9, MEFV, PDPN, LCK, CXCL11, GPR132, LPAR1, CD40, NPFFR2, CD70, RHOG, CYBB, PTGER4, CC…	Down-regulated
25	KRAS_SIGNALING_up	0.000317864	0.000677835	-0.402082	-1.98681	0	198	AKAP12, SPARCL1, SPP1, PRRX1, LY96, TRIB2, GFPT2, LAPTM5, APOD, ETV1, MMP9, ITGBL1, IL10RA, IGFBP3, ADGRL4, C3AR1, CXCR4, FCER1G, MAFB, DCBLD2, INHBA, GYPC, PECAM1, NRP1, SPON1, ALDH1A3, PEG3, EPB41L3, LAT2, CFB, IKZF1, ADGRA2, F13A1, NR0B2, TNFAIP3, CPE, MMP10, BIRC3, CROT, SCG5, TMEM158, CFH, SATB1, MAP4K1, PLAU, TMEM176A, CMKLR1, RABGAP1L, PPBP, TNFRSF1B, CLEC4A, TPH1	Down-regulated
26	INTERFERON_GAMMA_RESPONSE_up	0.000316256	0.000677835	-0.420824	-2.07762	0	196	TNFAIP6, CCL2, IL10RA, MX2, BST2, SOCS1, SSPN, CCL5, CD86, EPSTI1, IFI44L, CSF2RB, IFIT2, FCGR1A, CFB, TAPBP, NLRC5, C1S, TNFAIP3, MT2A, C1R, SAMHD1, CD74, GBP4, CFH, IRF7, LATS2, SP110, RSAD2, HLA-DRB1, SAMD9L, PARP12, FPR1, ADAR, HLA-DQA1, CMKLR1, PTPN6, IFNAR2, SECTM1, P2RY14, RIPK1, ISG15, METTL7B, IFI44, LYSMD2, IFI35, IRF4, CXCL11, STAT2, BANK1, CD40, CMPK2, SOCS3, CCL7, SERPING1, OASL, PSM…	Down-regulated
27	UV_RESPONSE_dn	0.000286697	0.000677835	-0.444336	-2.08765	0	139	COL1A2, COL1A1, ATP2B4, AKT3, SNAI2, GJA1, COL11A1, NR3C1, IGFBP5, NRP1, SERPINE1, RXRA, VAV2, DUSP1, COL3A1, PMP22, FBLN5, DLC1, EFEMP1, NEK7, FYN, DBP, CAP2, PDLIM5, CAV1, PIAS3, CELF2, PLPP3, RUNX1, TGFBR3, RGS4, ATXN1, NOTCH2, PIK3CD, IGF1R, PRDM2, ACVR2A, COL5A2, SMAD7	Down-regulated
28	COAGULATION_up	0.000285878	0.000677835	-0.478192	-2.24477	0	138	APOC1, SPARC, TIMP1, CTSK, MMP9, ANXA1, FN1, OLR1, FBN1, CLU, HTRA1, LRP1, THBS1, PECAM1, C3, SERPINE1, TIMP3, A2M, KLF7, ARF4, F10, MAFF, CFB, CTSB, FYN, C1S, MMP2, MMP10, C1R, DUSP14, RGN, CFH, F2, MMP14, CSRP1, MMP8, PLAU, ISCU, GSN, SERPINB2, TF, VWF, COMP, MMP15, CFD	Down-regulated
29	ANGIOGENESIS_up	0.000237417	0.000677835	-0.655587	-2.37034	0	36	SPP1, TIMP1, FSTL1, POSTN, LUM, FGFR1, OLR1, VCAN, NRP1, VAV2, COL3A1, APOH, LPL, COL5A2, VTN, JAG1	Down-regulated
30	MYOGENESIS_up	0.000316857	0.000677835	-0.483894	-2.38914	0	197	SPARC, AEBP1, APOD, TAGLN, COL1A1, LAMA2, MYLK, IGFBP3, GADD45B, CLU, SORBS1, ADAM12, CRYAB, COL6A3, SSPN, COL6A2, WWTR1, PDLIM7, TPM2, COL3A1, RB1, LPIN1, GJA5, IGFBP7, PC, AGRN, CNN3, PTGIS, SH3BGR, MRAS, ANKRD2, MYH9, APLNR, COX6A2, MYH11, GPX3, HRC, NAV2, IGF1, MYOZ1, MYLPF, PTP4A3, MEF2D, COX7A1, TNNI2, PSEN2, MYOG, ITGB5, GSN, DMPK, SVIL, FKBP1B, PRNP, PDE4DIP, ACTN3, CFD, MYH7, CD36, FXYD1…	Down-regulated
31	EPITHELIAL_MESENCHYMAL_TRANSITION_up	0.000316857	0.000677835	-0.710951	-3.5102	0	197	FAP, SLIT3, COL1A2, SPARC, ACTA2, SPP1, PRRX1, TIMP1, THBS2, SPOCK1, FSTL1, FLNA, COL5A1, MXRA5, TAGLN, COL1A1, LAMA2, CTHRC1, MYLK, POSTN, LOXL1, LUM, FN1, LOX, TPM4, LGALS1, MGP, IGFBP3, BGN, SNAI2, GADD45B, FBN1, BASP1, SLIT2, MFAP5, VCAN, MYL9, ADAM12, LAMA1, GJA1, COL11A1, HTRA1, LRP1, THBS1, INHBA, FERMT2, COL6A3, COL6A2, SFRP4, ITGA5, EFEMP2, SERPINE1, TIMP3, SFRP1, TPM2, COL3A1, CALD1, GR…	Down-regulated

## Sheet: MUSE_H
	pathway	pval	padj	ES	NES	nMoreExtreme	size	leadingEdge	Enrichment
2	ANDROGEN_RESPONSE_up	0.00940439	0.0242534	-0.362068	-1.52439	56	97	TNFAIP8, AKAP12, ACTN1, MYL12A, ELK4, B2M, CAMKK2, BMPR1B, XRCC5, ALDH1A3, KLK3, GNAI3, PTPN21, RPS6KA3, ADAMTS1, SGK1, ELL2, ABCC4, ANKH, HPGD, HSD17B14, RRP12, NGLY1, ZBTB10, MAF, SLC38A2	Down-regulated
3	NOTCH_SIGNALING_up	0.0150455	0.0368614	-0.472704	-1.5976	85	32	FZD7, HES1, FBXW11, JAG1, NOTCH2, KAT2A, HEYL, NOTCH3, ST3GAL6, NOTCH1, DTX1	Down-regulated
4	APICAL_JUNCTION_up	0.000154131	0.000505233	-0.358342	-1.67541	0	194	NLGN3, PECAM1, MYL9, EVL, NEXN, LAYN, PTPRC, ACTN1, VCAN, JAM3, ARHGEF6, TGFBI, PARVA, MMP2, TRAF1, THY1, FBN1, SLIT2, INPPL1, CD86, TNFRSF11B, ACTG2, MYH10, CERCAM, LDLRAP1, GNAI1, AKT3, CNTN1, CD99, PTK2, CD274, TMEM8B, LAMB3, IRS1, AMIGO2, FLNC, PARD6G, ITGA2, MYL12B, ACTB, ITGB1	Down-regulated
6	INFLAMMATORY_RESPONSE_up	0.000153633	0.000505233	-0.374345	-1.75693	0	199	SERPINE1, CXCL9, IRF1, RGS1, MSR1, CCR7, IL10RA, TIMP1, CSF1, CCL2, PCDH7, CXCL11, CYBB, INHBA, GABBR1, CXCL10, ABCA1, C5AR1, TLR1, ITGA5, SGMS2, OSMR, ACVR2A, CALCRL, ABI1, IL4R, P2RY2, CD40, CCL5, AXL, CSF3R, BST2, GNAI3, TLR2, IL1R1, CCL7, IFITM1, FPR1, IRAK2, CD48, STAB1, PVR, EDN1, EREG, MXD1, EIF2AK2, BDKRB1, HIF1A, C3AR1, MEFV, RELA, CLEC5A, CDKN1A, SELE, IL18RAP, GCH1, NFKB1, RASGRP1, SCN…	Down-regulated
7	APOPTOSIS_up	0.000157654	0.000505233	-0.39473	-1.79467	0	158	BGN, IRF1, ANXA1, TIMP1, TIMP3, LUM, DPYD, GSN, CAV1, MMP2, FEZ1, SMAD7, IFNGR1, DCN, LEF1, RHOT2, ADD1, TGFBR3, TXNIP, PEA15, BCL2L1, PTK2, VDAC2, MCL1, BTG3, CYLD, EMP1, CTNNB1, DNM1L, MGMT, WEE1, ANKH, GADD45A, CD2, EREG, ATF3, TNFRSF12A, CLU, CD38, HSPB1, HGF, F2R, RELA, CDKN1A, SATB1, RHOB, CFLAR, CDK2, GCH1	Down-regulated
8	COMPLEMENT_up	0.000153822	0.000505233	-0.385986	-1.81014	0	198	SERPINE1, APOC1, CSRP1, IRF1, ZEB1, PLA2G7, WAS, GNB4, TIMP1, FN1, CTSB, DOCK10, C1S, FCER1G, C1R, AKAP10, DGKH, GRB2, C3, PSMB9, CTSH, CFH, CTSD, PLSCR1, CDH13, DOCK9, LRP1, CTSC, ITGAM, CCL5, ATOX1, LGMN, CTSL, LTA4H, GNAI3, CASP10, GNG2, CTSS, ANXA5, PPP2CB, FCN1, PRCP, DUSP5	Down-regulated
9	TNFA_SIGNALING_VIA_NFKB_up	0.000153822	0.000505233	-0.397352	-1.86344	0	198	SERPINE1, FUT4, TNFAIP8, IRF1, F2RL1, CSF1, EGR1, CCL2, KLF10, CXCL11, DENND5A, PLK2, IRS2, INHBA, CXCL10, ABCA1, TRAF1, CLCF1, DNAJB4, EGR2, NR4A3, GFPT2, NFKB2, RELB, HES1, CCL5, CD80, SLC2A3, IER2, TLR2, LAMB3, MCL1, MARCKS, BTG3, JAG1, SGK1, GEM, CD83, DUSP5, GADD45A, IFIT2, EDN1, KLF2, MXD1, ATF3, KLF9, EFNA1, DUSP1, AREG, LITAF, RELA, CDKN1A, BCL3, RHOB, IL23A, ZBTB10, CFLAR, GCH1, NINJ1, N…	Down-regulated
10	IL2_STAT5_SIGNALING_up	0.000154154	0.000505233	-0.399772	-1.8699	0	195	SPP1, ALCAM, ADAM19, IL10RA, COL6A1, CSF1, LRIG1, DENND5A, NCOA3, PRKCH, CXCL10, IL3RA, PLAGL1, SELP, CCR4, TRAF1, LCLAT1, IFNGR1, ENPP1, GALM, PLSCR1, GABARAPL1, CD86, IL4R, ABCB1, CAPG, CST7, NCS1, NT5E, BCL2L1, BMPR2, MAPKAPK2, TGM2, SLC2A3, GLIPR2, EMP1, FURIN, SYT11, CD48, CYFIP1, UMPS, IRF8, CD83, P4HA1, GBP4, MXD1, SNX9, GSTO1, ECM1	Down-regulated
11	KRAS_SIGNALING_up	0.000153822	0.000505233	-0.422987	-1.98366	0	198	SPP1, PECAM1, IGFBP3, AKAP12, MMD, ETV5, F2RL1, SPARCL1, IL10RA, FCER1G, PPBP, ADGRA2, INHBA, APOD, CXCL10, TRAF1, TLR8, PRRX1, ANO1, GFPT2, CFH, AMMECR1, LAT2, IL2RG, ABCB1, TRIB2, LAPTM5, ALDH1A3, LY96, EVI5, ADGRL4, TMEM176A, SERPINA3, CCSER2, RBP4, MMP11, TMEM176B, IKZF1, PRKG2, CTSS, SCG5, CD37, FLT4, EMP1, ITGA2, BTC, ANKH, IRF8, FBXO4, EREG, TSPAN7, CROT, ST6GAL1, PRDM1, MAP3K1, C3AR1, GAD…	Down-regulated
12	IL6_JAK_STAT3_SIGNALING_up	0.000166528	0.000505233	-0.481856	-1.99431	0	87	CXCL9, IRF1, CSF1, CXCL11, STAT1, A2M, CXCL10, IL3RA, CCR1, GRB2, IFNGR1, OSMR, IL4R, IL2RG, IL17RA, CSF3R, TLR2, IL1R1, CCL7, CSF2RB, TYK2, TNFRSF12A, CD38, CD9, IL10RB, PTPN2, ITGA4, CXCL1, STAM2, HAX1, FAS, CXCL13, IL6ST, MYD88	Down-regulated
13	COAGULATION_up	0.000159642	0.000505233	-0.459534	-2.04414	0	138	SERPINE1, APOC1, CSRP1, PECAM1, ARF4, ANXA1, TIMP1, FN1, CTSB, TIMP3, C1S, THBS1, C1R, A2M, GSN, MMP2, C3, SPARC, FBN1, KLF7, CTSH, CFH, LRP1, ISCU, APOC2, LGMN, LTA4H, DUSP14, PEF1, MMP11, PRSS23, ITGA2, FURIN, GNG12, CTSK, CLU, MASP2, CD9, P2RY1, RGN, APOA1, CPQ	Down-regulated
14	ANGIOGENESIS_up	0.000175285	0.000505233	-0.599079	-2.07957	0	36	SPP1, FGFR1, POSTN, VCAN, TIMP1, LUM, COL5A2, COL3A1, SLCO2A1, PTK2, JAG1	Down-regulated
15	UV_RESPONSE_dn	0.000159923	0.000505233	-0.474796	-2.11325	0	139	SERPINE1, ADGRL2, RUNX1, COL1A2, FBLN5, COL11A1, RGS4, IGFBP5, PTPRM, ATP2B4, COL5A2, CAP2, COL3A1, CAV1, TGFBR2, KALRN, SMAD7, CDON, ACVR2A, KCNMA1, SLC22A18, TGFBR3, GCNT1, AKT3, NR3C1, MMP16, PIAS3, PTPN21, IRS1, MGMT, SIPA1L1, PRDM2, PMP22, NOTCH2, MAPK14, DYRK1A, DAB2, ATRX, DUSP1, ATXN1, SCN8A, NIPBL, EFEMP1, SNAI2, CDC42BPA, RBPMS, NFKB1, DBP, HAS2, COL1A1, ANXA2, SYNJ2, CDK13, PIK3R3, BHL…	Down-regulated
16	ALLOGRAFT_REJECTION_up	0.000154727	0.000505233	-0.461437	-2.15372	0	193	CCR5, CXCL9, FLNA, PTPRC, HLA-DQA1, WAS, TIMP1, CSF1, CCL2, HLA-DMA, HLA-DOA, STAT1, NCF4, KLRD1, INHBA, MAP3K7, PRKCB, CCR1, THY1, TLR1, HLA-DRA, B2M, IFNGR1, CXCR3, ACVR2A, CD86, ABI1, IL4R, GCNT1, IL2RG, TRAT1, CD40, CAPG, CCL5, SPI1, DYRK3, CARTPT, CD80, IGSF6, TLR2, CCL7, HLA-DMB, TLR6, CTSS, EIF3J, CCR2, GBP2, STAB1, IRF8, FGR, CD2, EREG, HIF1A, CD74, F2R, CD3G, IFNAR2, BCL3, HLA-DOB, CD3E,…	Down-regulated
17	TGF_BETA_SIGNALING_up	0.000171999	0.000505233	-0.577092	-2.18121	0	54	RAB31, SERPINE1, LTBP2, PPM1A, KLF10, THBS1, ACVR1, MAP3K7, SMAD7, NOG, SKIL, SMURF2, BMPR2, WWTR1, CDK9, FURIN, CTNNB1, FKBP1A, APC, SKI, FNTA	Down-regulated
18	INTERFERON_ALPHA_RESPONSE_up	0.0001657	0.000505233	-0.541323	-2.27039	0	94	IRF1, PARP9, CSF1, PSME1, CXCL11, MX1, C1S, LPAR6, EPSTI1, CXCL10, B2M, PSMB9, PLSCR1, IL4R, TXNIP, PARP14, MVB12A, SAMD9, SAMD9L, BST2, IFITM1, ISG15, HLA-C, GBP2, CMPK2, UBA7, HERC6, IFIT2, GBP4, PSME2, EIF2AK2, UBE2L6, CD74, TDRD7, IFITM2, TRIM21, NCOA7, TRAFD1, LAMP3, IFI44L, LAP3	Down-regulated
19	INTERFERON_GAMMA_RESPONSE_up	0.000153917	0.000505233	-0.490607	-2.29772	0	196	FCGR1A, CXCL9, SECTM1, IRF1, SSPN, HLA-DQA1, IL10RA, PSME1, CCL2, HLA-DMA, CXCL11, MX1, C1S, C1R, STAT1, NCOA3, EPSTI1, CXCL10, P2RY14, HLA-DRB1, ITGB7, SELP, IL18BP, GBP6, B2M, SAMHD1, PSMB9, IFIT1, CFH, RAPGEF6, PLSCR1, CD86, IL4R, TXNIP, HLA-B, PARP14, CD40, CCL5, SAMD9L, BST2, CD274, SLAMF7, CCL7, CSF2RB, ISG15, FPR1, RNF213, CMPK2, HERC6, IRF8, IFIT2, GBP4, PSME2, EIF4E3, EIF2AK2, CD38, UBE2…	Down-regulated
20	EPITHELIAL_MESENCHYMAL_TRANSITION_up	0.000153563	0.000505233	-0.639852	-2.99969	0	197	ACTA2, COL6A3, SPP1, MYLK, SERPINE1, BGN, COL12A1, CALD1, LGALS1, FLNA, MYL9, IGFBP3, TAGLN, LOXL1, COL1A2, POSTN, TPM1, FBLN5, COL11A1, RGS4, GLIPR1, GREM1, VCAN, TIMP1, THBS2, FN1, TIMP3, VIM, SPOCK1, ADAM12, THBS1, LUM, COL5A2, TGFBI, SFRP4, SFRP1, CAP2, DKK1, MGP, COL5A1, COL3A1, DST, INHBA, LOX, MMP2, FBLN1, THY1, CXCL12, SPARC, ITGA5, FBN1, SLIT2, PRRX1, COL6A2, DCN, MXRA5, TPM2, VEGFC, TNF…	Down-regulated

## Sheet: CTDE_C1
	pathway	pval	padj	ES	NES	nMoreExtreme	size	leadingEdge	Enrichment
1	chr2p11_up	0.000306279	0.0196784	0.414858	1.99541	0	153	IGKV1-33, IGKV1-5, IGKV1D-22, IGKV2-28, IGKV3-11, IGKV1-22, IGKV3-15, IGKV1-6, IGKV1D-13, IGKV2D-28, IGKV1D-33, IGKV4-1, IGKV2D-24, TCF7L1-IT1, RETSAT, MAT2A, IGKV1D-35, IGKV3D-11, IGKV1-13, IGKV1D-12, RNF181, IGKV1-37, IGKV1D-39, IGKV1D-16, IGKV6D-21, IGKV2-38, FOXI3, IGKV3D-7, ACTR3BP2, IGKV1D-37, IGKV1D-42, IGKV1OR2-118, VAMP5, IGKV2-4, IGKV1D-32, GNLY, IGKV3D-20, PTCD3, IGKV6-21, PABPC1P6, IG…	Up-regulated
2	chrYp11_up	0.000279018	0.0196784	0.389584	1.73799	0	95	XGY2, FAM197Y6, FAM197Y3, FAM197Y2, SRY, FAM197Y9, FAM197Y5, FAM197Y4, RBMY2JP, FAM197Y7, RPS4Y1, TTTY7B, AGPAT5P1, TSPY25P, RBMY2HP, TRIM60P3Y, GOT2P5, RBMY2OP, EIF4A1P2, TSPY19P, TSPY20P, DLGAP5P1, RNF19BPY, PCDH11Y, TTTY19, ZFY, CDY3P, USP12PY, FAM197Y1, MTCYBP1, TTTY20, NAP1L1P2, HSFY3P, SERBP1P2, USP9YP22, MTND6P1, EEF1A1P41, TSPY24P, OFD1P3Y, ZNF736P8Y, RBMY2QP, TTTY8, TTTY18	Up-regulated
3	chr15q11_up	0.000560852	0.0205913	0.370146	1.66983	1	101	SNORD108, SNORD116-1, SNORD116-19, NBEAP1, BCAR1P1, CXADRP2, SNORD116-2, SNRPN, NDN, ELMO2P1, MAGEL2, OR4N3P, SNORD64, IGHV1OR15-4, SNORD115-10, OR11H3P, PWAR1, IGHV1OR15-3, BMS1P15, SNORD115-37, WHAMMP3, SNORD115-38, OR11K1P, RPS8P10, SNORD115-24, SNORD115-14, ZNF519P3, SNORD115-45, SNORD115-28, SNORD115-17, SNORD115-18, SNORD115-19, GOLGA8CP, CHEK2P2, IGHV1OR15-2, IGHV3OR15-7	Up-regulated
4	chr14q32_up	0.000386399	0.0198609	0.286054	1.51107	0	319	SNORD113-4, IGHG4, FBLN5, SNORD114-21, SNORD114-5, SNORD113-6, SNORD113-1, SNORD112, SNORD114-25, MEG3, SNORD114-1, IGHG3, SNORD114-20, IGHV4-28, IGHV1-45, SNORD114-30, TMEM179, SNORD114-4, IGHV4-61, GOLGA5, EML1, SNORD113-9, WDR25, MEG8, IGHV3-33-2, DYNC1H1, TCL1B, CATSPERB, IGHV3-74, IGHV3-63, IGHV7-56, C14orf180, IGHV2-70, TRAF3, SNORD114-22, IGHV4-55, IGHV3-30-2, IGHVII-78-1, RPSAP5, TRIP11, …	Up-regulated
5	chr11q12_up	0.00124224	0.0399068	-0.310684	-1.48397	8	273	MS4A15, BTBD18, TKFC, MS4A14, CNTF, C11orf98, OR5M2P, TCN1, PGA5, OR5M5P, DAGLA, PGA3, TMX2, SNORD22, OR5L1, OR5BP1P, OR5T2, OR5AO1P, SLC22A9, PTGDR2, MS4A8, SRD5A3P1, OR5M11, NPM1P35, OR9L1P, OR8J2, ZFP91-CNTF, CD6, PRG2, VWCE, ROM1, OR5B15P, GLYAT, OR5BC1P, MRPL16, OR5AK3P, OR5G5P, OR8K1, OR5M12P, TMA16P1, POLR2G, TMEM132A, OR5BL1P, GLYATL1P1, OR5A2, FAM8A2P, FEN1, PGA4, FADS2, RPS4XP13, OOSP2,…	Down-regulated
6	chr16p13_up	0.000138045	0.0188998	-0.344631	-1.64788	0	277	RMI2, GSPT1, ENPP7P14, RNPS1, SNORD60, EEF2KMT, CORO7, PTX4, PLA2G10, TRAP1, SPSB3, PARN, SNRPCP20, SNHG19, SOCS1, COX6CP1, PDXDC1, RHBDL1, MLST8, RPL7P46, NMRAL1, TELO2, HAGHL, RPL17P40, NTHL1, PRSS29P, UBE2I, PRM2, CLDN6, SMIM22, ALG1, KCTD5, NOMO1, CCDC78, NOMO3, NUBP2, TMEM186, SNRNP25, SNORA64, ABAT, CCNF, ABCC6, RPL21P119, RRN3, NDUFB10, GLYR1, NPW, NOXO1, SOX8, C16orf72, TSR3, MTND5P33, ND…	Down-regulated
7	chr7p15_up	0.000481773	0.0205913	-0.466531	-1.84633	2	72	CYCS, CBX3, HOXA13, MPP6, MALSU1, NFE2L3, FAM221A, TPM3P4, JAZF1-AS1, STK31, PSMC1P2, TPT1P7, SUMO2P14, SNRPCP19, HNRNPA2B1, IGF2BP3, RPL35P4, SNX10, TOMM7, TSEN15P3, HOXA10, HOXA10-AS, HOXA1, PCMTD1P3, NHP2P2, EVX1, RPL12P10, CREB5, CDCA7L, STEAP1B, GPNMB	Down-regulated
8	chr20q11_up	0.00014708	0.0188998	-0.419211	-1.90049	0	176	TPX2, ZNF341, GSS, FAM83D, RPS3AP3, PHF20, COX7BP2, HM13-AS1, CDK5RAP1, SNORA71E, KIF3B, SNORA71C, CEP250, PDRG1, DSN1, RBM12, ERGIC3, ID1, NFS1, SNORA71D, PLAGL2, RPRD1B, ACSS2, BLCAP, REM1, NNAT, EIF2S2, SLA2, SUN5, BPIFA4P, ACTR5, MROH8, AHCY, BPI, PIGPP3, GGT7, RPN2, EIF6, SNORA71B, VSTM2L, DLGAP4-AS1, MAPRE1, PXMP4, BPIFA2, ACTL10, RBM39, TGIF2, DEFB121, XKR7, ASIP	Down-regulated

## Sheet: CTMU_C1
	pathway	pval	padj	ES	NES	nMoreExtreme	size	leadingEdge	Enrichment
1	chr3p13_up	0.000186602	0.0217539	0.689485	2.06642	0	21	UBE2Q2P9, PROK2, GXYLT2, FTH1P23, GPR27, RYBP, PPP4R2, PDZRN3-AS1, LAPTM4BP2, SHQ1, MITF	Up-regulated
2	chr1q23_up	0.000163532	0.0217539	0.399376	1.79447	0	171	MNDA, FCGR2A, FCGR2B, FCGR2C, CD84, FCGR3B, RGS4, FCER1G, IFI16, FCGR3A, TOMM40L, OLFML2B, PEA15, SLAMF8, APOA2, KCNJ10, FCER1A, NES, EI24P2, HSPA6, HSPA7, ADAMTS4, USP21, CRP, CD1C, APCS, FCRL2, SLAMF6, CD1A, OR10J8P, CD1B, SLAMF6P1, ATF6, PBX1, OR10K2, DDR2, NTRK1, NHLH1, OR6K4P, SLAMF9, PYHIN5P, DCAF8, ARHGAP30, PYHIN1, VSIG8	Up-regulated
3	chr1q21_up	0.000474533	0.0304888	0.339131	1.59679	2	244	CTSK, S100A8, ADAMTSL4, S100A9, DCST2, FLG-AS1, HYDIN2, FCGR1A, GJA5, SETDB1, SRGAP2B, SHC1, IL6R, FAM72C, LIX1L, VPS45, MCL1, NBPF25P, ADAR, PLEKHO1, CDC42SE1, ADAMTSL4-AS1, CD160, FLG2, S100A12, OTUD7B, MLLT11, SPTLC1P4, CTSS, RPTN, SPRR2G, S100A3, IVL, SHE, HORMAD1, S100A7, ECM1, NBPF11, PRPF3, NBPF9, PBXIP1, LCE2D, VPS72, PDE4DIPP1, NBPF20, PRKAB2, KPRP, NBPF14, SPRR2D, NBPF15, NBPF13P, SPRR1…	Up-regulated
4	chr7q22_up	0.000253936	0.0217539	-0.373466	-1.75244	0	156	CYP3A5, MUC3A, MUC17, BAIAP2L1, SLC26A5, CPSF4, DUS4L, AP4M1, C7orf61, MOGAT3, RPSAP46, SPDYE3, ZKSCAN1, PUS7, KPNA7, PTCD1, FBXL13, CYP3A7, TRRAP, SYPL1, BUD31, MUC12, CCDC71L, ORC5, FIS1, NAPEPLD, AP1S1, ZNHIT1, AZGP1P2, ARPC1A, SMURF1, PILRB, SAP25, EPHB4, ZNF3, DNAJC2, RPL23AP95, MEPCE, LHFPL3-AS1, SPDYE6, COG5	Down-regulated
5	chr7p21_up	0.000919752	0.0472752	-0.446751	-1.76375	3	57	TSPAN13, AGR2, GLCCI1, ICA1, AGR3, RPL36AP26, GTF3AP5, RPA3, HSPA8P8, LRRC72, MIOS, EEF1A1P26, ITGB8, GAPDHP68	Down-regulated

## Sheet: DESE_C1
	pathway	pval	padj	ES	NES	nMoreExtreme	size	leadingEdge	Enrichment
1	chr17q22_up	0.000166472	0.0311742	0.539591	1.99647	0	52	RAD51C, RNF43, PRR11, COIL, SUPT4H1, PCTP, COX11, AKAP1, DYNLL2, MSI2, RNF126P1, EPX, SNRPGP17, MRPS23, SRSF1, HSF5, TOM1L1, TRIM25, MTMR4, VEZF1	Up-regulated
2	chr7p21_up	0.0003276	0.0311742	0.489353	1.84419	1	57	AGR2, AGR3, RPA3, NDUFA4, BZW2, RPL36AP26, TSPAN13, RPL6P21, RPL23AP52, VWDE, ARL4A, MIOS, PRPS1L1, RPL23P8, PHF14, SCIN, RAD17P1, MACC1, AHR, EEF1A1P26, GTF3AP5, MACC1-AS1, HSPA8P8, GLCCI1, HDAC9, ICA1	Up-regulated
3	chr8q21_up	0.000614439	0.0394777	0.397515	1.69325	3	116	TPD52, OSGIN2, OTUD6B, E2F5, HNF4G, JPH1, CA1, NBN, CASC9, RDH10, RPL7, ZBTB10, CKS1BP7, GDAP1, CHMP4C, REXO1L2P, FABP5, ATP6V0D2, CA3, RPSAP47, HIGD1AP18, ZFAND1, WWP1, MRPS28, SNX16, CPNE3, COX6B1P6, HNRNPA1P4, SOX5P1, DECR1, REXO1L4P, RPL3P9, UBE2HP1, STMN2, DCAF4L2, CRISPLD1, SLC2A3P4, LRRCC1, UBE2W, TRPA1, HAUS1P3	Up-regulated
4	chr14q32_up	0.000363901	0.0311742	-0.306374	-1.6019	0	319	IGHG3, ATXN3, EVL, SNORD113-2, IGHVII-60-1, SNORD114-2, AHNAK2, SNORD113-3, SNORD113-4, SNORD114-22, SNORD114-25, SNORD114-30, MOK, IGHG4, SNORD114-20, FBLN5, SNORD114-9, SNORD113-1, IGHV2-26, IGHV1-58, FAM181A-AS1, IGHVII-40-1, SNORD114-28, MEG3, SNORD114-4, IGHV3-33, IGHEP1, MEG8, GSC, CDC42BPB, SNORD114-5, RD3L, ELK2AP, SNORD113-6, SNORD114-14, SNORD114-23, BRF1, SERPINA12, IGHV1-67, IGHV3-30,…	Down-regulated

## Sheet: MUSE_C1
	pathway	pval	padj	ES	NES	nMoreExtreme	size	leadingEdge	Enrichment
1	chrXq25_up	0.000229885	0.0220715	0.600461	2.07557	0	29	RPL7AP72, TEX13D, PRR32, TENM1, DCAF12L1, DCAF12L2, STAG2, RPS26P56, TUBB4AP1, NPM1P34, MEMO1P4, ZIK1P1, MTND4P24, BTG3P1	Up-regulated
2	chr14q32_up	0.000582157	0.0249357	-0.30125	-1.48881	3	319	SNORD114-21, SNORD114-20, IGHG3, SNORD113-1, SNORD114-2, EVL, FBLN5, SNORD113-9, MEG8, SNORD113-6, SNORD114-25, SERPINA12, SNORD113-4, SNORD114-14, IGHV3-54, SNORD114-16, BRF1, IGHV3-30-2, MOK, IGHV1-18, IGHV3-79, TTC7B, FAM181A-AS1, IGHV3-66, IGHD, IGHG4, IGHV1-17, AHNAK2, LGMN, IGHV1-14, FOXN3-AS1, SERPINA2, SERPINA3, SNORD114-13, CLMN, FOXN3, SNORD114-27, SNORD114-17, SNORD114-4, PLD4, IGHA1, …	Down-regulated
3	chr1q32_up	0.000475436	0.0244374	-0.363674	-1.67937	2	179	CSRP1, PPP1R12B, ATP2B4, C1orf116, ELK4, PROX1-AS1, SLC41A1, RPS6KC1, SRGAP2, IPO8P1, IL24, YOD1, IPO9-AS1, IPO9, SMYD2, DYRK3, RASSF5, LMOD1, MAPKAPK2, SNORA77, LAMB3, ARL8A, CAMSAP2, PPFIA4, IL20, LRRN2, SYT14, CHIT1, SERTAD4-AS1, C4BPAP2, SNORA70, TRAF5, RPL23AP18, ATF3, DTL, CBX1P3, SLC25A39P1, AVPR1B, KLHL12, LAX1, LEMD1, SNORA72, KLHDC8A, LPGAT1, CDCA4P4, FCMR, NAV1, TRAF3IP3	Down-regulated
4	chr2p11_up	0.000319132	0.0220715	-0.372363	-1.68599	1	153	TCF7L1-IT1, IGKV2D-29, IGKV1-9, IGKV2-29, IGKV1-8, IGKV1-12, IGKV1D-35, IGKV1-5, ATOH8, IGKV1D-8, SLC9B1P2, CAPG, GGCX, IGKV2-4, IGKV2D-18, RGPD2, IGKV7-3, IGKV1-16, IGKV1D-39, KCMF1, IGKV2-14, IGKV2D-10, IGKV1-39, IGKV3D-11, IGKV1-33, IGKV1D-33, IMMT, RNF181, CHMP3, PARTICL, IGKV3-20, IGKV2-26, RNF103-CHMP3, PLGLB1, MRPL35, SMYD1, IGKV3OR2-268, VAMP8, IGKV1-6, RPIA, DRD5P1, IGKV2D-30, ST3GAL5-AS…	Down-regulated
5	chr2q32_up	0.000343525	0.0220715	-0.46307	-1.81757	1	63	GULP1, COL5A2, STAT1, COL3A1, GLS, STK17B, OSGEPL1, CALCRL, MFSD6, DUSP19, PMS1, AHCYP5, DPRXP1, ZC3H15, HMGB1P27, CACYBPP2, SLC40A1, RPL31P15, FSIP2-AS1, OSGEPL1-AS1	Down-regulated
6	chr11q25_up	0.000182815	0.0220715	-0.701918	-2.06264	0	18	OPCML, JAM3, VPS26B, SNX19, OPCML-IT2, NTM, NTM-IT, B3GAT1	Down-regulated

## Sheet: CTDE_C2
	pathway	pval	padj	ES	NES	nMoreExtreme	size	leadingEdge	Enrichment
1	SCHUETZ_BREAST_CANCER_DUCTAL_INVASIVE_up	0.000402253	0.00450623	0.694832	3.68302	0	336	LOX, PRRX1, COPZ2, COL6A3, EDNRA, ASPN, BGN, OLFML2B, FN1, COL10A1, DCN, LOXL1, BICC1, PDGFRA, LUM, MFAP2, POSTN, SNAI2, SCG5, ITGBL1, IFI16, LGALS1, SRPX2, GFPT2, PLS3, TDO2, THY1, EMP3, SULF1, MFAP5, LY96, INHBA, TRPC1, TCF4, MSR1, ETV1, COL3A1, CD74, MXRA5, SMAD7, ZEB1, EVI2A, EFEMP2, DSE, SPARC, COL1A2, TFEC, CD53, FAP, SGCB, FBN1, HLA-DPA1, VCAN, IRAK3, DAB2, PLCG2, LAPTM5, PLSCR4, C1QB, MME…	Up-regulated
2	ANASTASSIOU_MULTICANCER_INVASIVENESS_SIGNATURE_up	0.000268456	0.00422266	0.887351	3.64783	0	63	LOX, PRRX1, COPZ2, COL6A3, EDNRA, RAB31, ASPN, BGN, OLFML2B, FN1, GLT8D2, COL10A1, DCN, LUM, POSTN, SNAI2, ITGBL1, LGALS1, SFRP4, THY1, SULF1, MFAP5, INHBA, ACTA2, COL3A1, MXRA5, SPARC, COL1A2, FAP, FBN1, VCAN, NOX4, CTSK, SERPINF1, COL11A1, EPYC, NTM, NID2, THBS2, CRISPLD2, AEBP1, C1QTNF3, COL1A1, GREM1, MMP2, COL6A2, COL5A1, SPOCK1, LRRC15, TNFAIP6	Up-regulated
3	VECCHI_GASTRIC_CANCER_ADVANCED_VS_EARLY_up	0.00032352	0.00422266	0.694513	3.37229	0	165	LOX, PRRX1, PLXDC2, FRMD6, EDNRA, RAB31, SFRP2, BGN, CTHRC1, FN1, COL10A1, LAMA2, SNAI2, GXYLT2, ITGBL1, SFRP4, GFPT2, BMPR1B, SULF1, ANTXR1, INHBA, CDK14, TRPC1, MSR1, CYP1B1, CHST11, PRDM6, DSE, SPARC, COL1A2, ANGPT2, EFEMP1, FAP, FBN1, VCAN, MGP, CYP7B1, DAB2, SFMBT2, PIK3R5, NOX4, TPRG1, QKI, ZNF532, ISM1, COL11A1, ANOS1, TMEM45A, IGFBP3, BCAT1, NREP, C3AR1, ARL4C, FSTL1, CD163, CPNE8, FMO2, …	Up-regulated
4	BOQUEST_STEM_CELL_up	0.000354359	0.00424567	0.634281	3.26444	0	254	LOX, PRRX1, COL6A3, OLFML2B, GLT8D2, LAMA2, DCN, BICC1, PDGFRA, LUM, MFAP2, ITGBL1, CYBRD1, APOD, SFRP4, GFPT2, PDGFRL, BASP1, EMP3, MFAP5, TIMP1, FBLN5, INHBA, OMD, PLA2G4A, COL3A1, MXRA5, ABI3BP, DSE, C3, COL1A2, BHLHE41, EFEMP1, FAP, FBN1, VCAN, MGP, SLIT3, OGN, MEG3, BBS9, DPT, MME, COL6A1, C1S, DZIP1, C1R, SHOX2, SCARA3, CTSK, MAN1C1, SEMA3C, PTPN13, SERPINF1, TMEM45A, IGFBP3, MEIS2, TRO, PL…	Up-regulated
5	TURASHVILI_BREAST_LOBULAR_CARCINOMA_VS_DUCTAL_NORMAL_up	0.000268384	0.00422266	0.740086	3.06921	0	65	LOX, PRRX1, COL6A3, EDNRA, SFRP2, ASPN, BGN, CTHRC1, FN1, POSTN, THY1, SULF1, INHBA, COL3A1, MXRA5, ZEB1, SPARC, COL1A2, FBN1, VCAN, LAMB1, GPX8, COL11A1, RGS1, CXCR4, THBS2, AEBP1, COL1A1, UBTD2, COL5A1, LRRC15, PLXNC1, C5AR1, SULF2	Up-regulated
6	PICCALUGA_ANGIOIMMUNOBLASTIC_LYMPHOMA_up	0.000337154	0.00422266	0.613616	3.06425	0	200	PRRX1, CTHRC1, FN1, NR2F2, LOXL1, PDGFRA, LUM, SLCO2B1, EMCN, CYBRD1, CCDC80, TDO2, THY1, SULF1, ANTXR1, ACTA2, COL3A1, CYP1B1, MXRA5, ABI3BP, C3, SPARC, COL1A2, FBN1, IRAK3, DAB2, C1QB, CSRP2, COL6A1, C1S, TAGLN, C1R, LAMB1, CLU, SPARCL1, PDLIM5, VCAM1, FSTL1, IGFBP5, MMP9, FAM20A, CFH, CALD1, PMP22, ADGRL4, FERMT2, RGL1, ADAMTS1, DCLK1, TLR4, ADGRF5, DPYSL3, COL1A1, WWTR1, C7, HSPB8, TMEM163, I…	Up-regulated
7	TURASHVILI_BREAST_LOBULAR_CARCINOMA_VS_LOBULAR_NORMAL_dn	0.000276472	0.00422266	0.712526	3.0034	0	72	LOX, PRRX1, COL6A3, SFRP2, ASPN, BGN, CTHRC1, FN1, COL10A1, POSTN, SFRP4, COL3A1, MXRA5, COL1A2, FBN1, VCAN, LAMB1, COL11A1, RGS1, CXCR4, THBS2, SAR1B, AEBP1, COL1A1, MMP2, COL5A1, LRRC15, C5AR1, SULF2, RFTN1, FNDC1, ADAM12, LYZ	Up-regulated
8	CLASPER_LYMPHATIC_VESSELS_DURING_METASTASIS_dn	0.000252972	0.00422266	0.808079	2.90392	0	34	LOX, COL6A3, BGN, LAMA2, LOXL1, RDX, TIMP1, COL3A1, JAM2, SDC1, COL1A2, FBN1, VCAN, COL6A1, SEMA3C, ROBO1, SDC2, COL6A2, COL5A1, LTBP2, LPAR1, NT5E, LTBP1	Up-regulated
9	ONDER_CDH1_TARGETS_2_up	0.000353857	0.00424567	0.5655	2.89672	0	246	LOX, PRRX1, COL6A3, BGN, FN1, DCN, BICC1, MFAP2, POSTN, SCG5, ITGBL1, CYBRD1, PDGFRL, THY1, FBLN5, ACTA2, COL3A1, CYP1B1, ZEB1, SPARC, COL1A2, FBN1, VCAN, FGFR1, DAB2, MME, COL6A1, PIP4K2A, GULP1, TAGLN, SERPINF1, NRP1, ZCCHC24, ANOS1, IGFBP3, NREP, PXDC1, ZFHX4, NLRP1, ABCA8, SERPINE1, NID2, DUSP1, RGS4, GNG11, RCAN2, KANK2, PMP22, GYPC, FERMT2, RGL1, EML1, NID1, SYNE1, DPYSL3, COL1A1, GREM1, SD…	Up-regulated
10	LINDGREN_BLADDER_CANCER_CLUSTER_2B_up	0.000411015	0.00454755	0.523941	2.81008	0	365	PRRX1, COPZ2, CLIC2, COL6A3, EDNRA, PDGFRA, LUM, POSTN, CYBRD1, LGALS1, ALOX5AP, PCDH7, PDGFRL, CCDC80, NRP2, EMP3, TCF4, ACTA2, ETV1, EVI2A, ABI3BP, SPARC, COL1A2, EFEMP1, LIX1L, MGP, RGS10, DNAJB5, DAB2, EGR1, LAPTM5, COL6A1, STOM, C1S, C1R, SLC43A3, HLA-DRA, AKAP12, SERPINF1, VCAM1, MT2A, GPM6B, C3AR1, ARL4C, GLIPR1, ANGPTL2, CXCR4, NID2, GNG11, RCAN2, AFF1, CMTR2, PMP22, CPXM1, THBS2, RUNX3, …	Up-regulated
11	KIM_GLIS2_TARGETS_up	0.000276778	0.00422266	0.639036	2.77983	0	83	DCN, PDGFRA, LUM, MFAP2, POSTN, MMP14, PDGFRL, COL3A1, CD74, EFEMP2, C3, SPARC, COL1A2, FBN1, MGP, OGN, DPT, SPARCL1, VCAM1, CFH, SERPINE1, COL14A1, HLA-DQA1, CMTM3, CASP4, NID1, COL1A1, HLA-DMB, LTBP2, SPON1, BCL2A1, OSMR, FCGR2A, CXCL12, TGFBR2, ICAM1, VIM, BOK, HLA-DRB1, CX3CL1	Up-regulated
12	REACTOME_ELASTIC_FIBRE_FORMATION_up	0.000258933	0.00422266	0.728192	2.77746	0	44	LOX, TGFB3, FN1, LOXL1, MFAP2, MFAP5, FBLN5, EFEMP2, EFEMP1, FBN1, MFAP1, ITGB1, TGFB2, ITGA5, ITGAV, ITGB6, LTBP2, EMILIN1, ITGA8, LOXL4, LTBP1, ITGB5, LTBP3	Up-regulated
13	IZADPANAH_STEM_CELL_ADIPOSE_VS_BONE_dn	0.000288268	0.00422266	0.589783	2.67553	0	104	LOX, SFRP2, ASPN, POSTN, CCDC80, MFAP5, PIP5K1A, TCF4, PALMD, JAM2, FBN1, DAB2, KCNE4, PLPP1, LAMB1, AKAP12, ATP2B4, RGS4, FBXO32, PTGIS, CRYAB, NRIP1, DOCK11, RASAL2, S100A16, ASAP3, NDN, EN1, RIMKLB, MYH11, LTBP2, KDM5B, LZTFL1, PODN, PLOD2, LRRC17, ARHGAP29, CELF2, BCL7A, SLC24A3, SERPING1, HOXB6, STAT4, RTN2, NEK1, HSPA2, TNNC1, AKR1C1, TXNIP, VCL	Up-regulated
14	THUM_MIR21_TARGETS_HEART_DISEASE_up	0.000237812	0.00422266	0.890782	2.67048	0	17	LOX, ASPN, BGN, TGFB3, LUM, POSTN, APOD, COL1A2, COL1A1, SVEP1, IGFBP7, LTBP2	Up-regulated
15	CROONQUIST_STROMAL_STIMULATION_up	0.00026434	0.00422266	0.675486	2.66579	0	52	LOX, COL6A3, LUM, BASP1, SULF1, ACTA2, MYOF, SPARC, COL1A2, VCAN, COL6A1, IGFBP3, SERPINE1, DUSP1, GUCY1A2, THBS2, NR4A2, IGFBP7, RPS4Y1, IER2	Up-regulated
16	RUIZ_TNC_TARGETS_up	0.000311429	0.00422266	0.554429	2.65968	0	148	EDNRA, OLFML2B, PDGFRA, TDO2, ID2, COL3A1, BNIP3L, COL1A2, SLC23A2, CHST15, PLPP1, LDB2, CLU, PNRC1, ZNF532, SEMA3C, PTPN13, PHF21A, VCAM1, ZCCHC24, ATP2B4, TRO, ARHGAP28, PDE5A, CBLB, ROBO1, LEF1, ZBTB20, CTSA, WDR26, SLC16A4, KLF9, IGFBP7, EXTL2, SLC2A3, PDCD4, BDH2, IQGAP2, EAPP, UBXN4, FLRT2, KDM5B, METTL7A, MEIS1, WSB1, RSRP1, PSAP, SEMA5A, SIDT2, BAMBI, IFIH1, PLK2, CXCL12, LTBP3, TPP1, ST3…	Up-regulated
17	WANG_SMARCE1_TARGETS_up	0.000370096	0.0043445	0.510304	2.65313	0	279	PRRX1, PLXDC2, COL6A3, CTHRC1, FN1, DCN, LUM, POSTN, CYBRD1, FRY, PCDH7, SLC12A8, TDO2, SULF1, MFAP5, ANTXR1, ACTA2, COL3A1, FAP, GJB2, VCAN, MGP, PLXND1, DAB2, PLSCR4, STOM, C1S, GULP1, TAGLN, TSHZ2, MAN1C1, PTPN13, FKBP7, BTD, ANOS1, BCAT1, IGFBP5, CLEC2B, KLF7, CFH, NID2, ZNF521, TGFB2, CALD1, TBX18, ATP10D, CBLB, FBXO32, PMP22, DPYD, CPE, RTN1, NID1, NRIP1, DPYSL3, COL1A1, CD200, LIMS1, CD109…	Up-regulated
18	ZHU_CMV_24_HR_dn	0.000276778	0.00422266	0.609753	2.65244	0	83	LOX, PDGFRA, POSTN, RUNX1, ACTA2, ID2, COL3A1, CYP1B1, COL1A2, EFEMP1, VCAN, GPX1, HIVEP2, TAGLN, C1R, PTPN13, IGFBP3, IGFBP5, SERPINE1, THBS1, PTGIS, THBS2, NR3C1, COL1A1, COL6A2, FTL, FLNA, ANXA1, TRAM2, AHR, ACO1	Up-regulated
19	NAKAYAMA_SOFT_TISSUE_TUMORS_PCA1_up	0.000277008	0.00422266	0.620439	2.64737	0	76	DCN, LUM, ITGBL1, VSIG4, SRPX2, LY96, TIMP1, C3, EFEMP1, FAP, HLA-DPA1, C1QB, MME, C1S, HLA-DRA, CD163, PLTP, CFH, SERPINE1, THBS1, HLA-DQA1, THBS2, BIN2, ECM1, IGKV1D-39, TNFAIP6, FCGR3A, GABBR1, FCGR2A, LYZ, GZMK, HLA-DQB1, SIGLEC1, FCGR2B, MS4A4A	Up-regulated
20	REN_ALVEOLAR_RHABDOMYOSARCOMA_dn	0.00043122	0.00464248	0.489552	2.64529	0	397	LOX, COPZ2, GNAI2, RAB31, FN1, LOXL1, PDGFRA, LXN, ITGBL1, SRPX2, MMP14, PLS3, TIMP1, FBLN5, INHBA, QPCT, MBNL1, SMAD7, EFEMP2, EFEMP1, DCBLD2, FAP, FBN1, VCAN, SEC24A, DAB2, SWAP70, COL6A1, C1S, GULP1, CLU, SCARA3, SEMA3C, PTPN13, GABARAPL1, NRP1, PDLIM5, SLC35A2, TMEM45A, SEC24D, IGFBP3, OSTM1, ARL4C, CD248, FSTL1, GLIPR1, PXDC1, TUSC3, ELOVL5, DUSP1, THBS1, BACE1, FNDC3B, ITGA5, ATP10D, PRKD1,…	Up-regulated
21	WAMUNYOKOLI_OVARIAN_CANCER_LMP_dn	0.000337154	0.00422266	0.532188	2.64413	0	194	DCN, SRGAP2, LXN, IFI16, CCDC80, BASP1, SULF1, TCF4, DSE, EFEMP1, LIX1L, DCBLD2, UBE2E2, DAB2, TTC28, PLSCR4, C1S, PLPP1, BNC2, ZNF532, CTSK, TMEM45A, OSTM1, IRF2BPL, CDON, NLRP1, TGFB2, CALD1, MNDA, GLI3, PMP22, DPYD, CPE, FERMT2, RGL1, ZBTB20, DPYSL3, DOCK11, HTRA1, SDC2, MAF, NDN, SLC30A4, TAOK1, PROCR, CRYBG3, EXTL2, SOCS5, BEX4, PTGS1, BLOC1S6, FLRT2, DDX5, RSRP1, FBXL7, FGF13, CELF2, RAB11F…	Up-regulated
22	FARMER_BREAST_CANCER_CLUSTER_4_up	0.000240154	0.00422266	0.857075	2.64333	0	19	SRPX2, COL3A1, SPARC, COL1A2, FAP, FBN1, CTSK, SERPINF1, NID2, THBS2, AEBP1, HTRA1, COL5A1, ADAM12, DACT1, FILIP1L	Up-regulated
23	MEBARKI_HCC_PROGENITOR_WNT_up	0.000329598	0.00422266	0.530974	2.62411	0	185	CTHRC1, FN1, DCN, LUM, SCG5, SRPX2, LAYN, PDGFRL, SLC12A8, CCDC80, COL3A1, ST6GAL2, CYP1B1, EVI2A, JAM2, SPARC, COL1A2, NAV1, DCBLD2, FAP, FBN1, VCAN, PPP2R2C, NOG, DPT, CLIC3, BNC2, SEMA3C, NR2F1-AS1, ARHGDIB, EPYC, ARL4C, GLIPR1, IGFBP5, KLF7, PSTPIP2, SERPINE1, TGFB2, RGCC, ITGA5, THBS2, F3, CRISPLD2, RBM24, GRAMD1A, PCSK5, LEF1, DPYSL3, COL1A1, MMP2, LCP1, FLNA, SPOCK1, LRRC15, PLAUR, TNFAIP6…	Up-regulated
24	ROY_WOUND_BLOOD_VESSEL_up	0.000261986	0.00422266	0.670034	2.6074	0	48	RAB31, LUM, POSTN, THY1, SULF1, TIMP1, COL3A1, ANGPT2, SGCB, VCAN, STOM, DENND4B, NRP1, ANGPTL2, NID2	Up-regulated
25	WP_TGFBETA_RECEPTOR_SIGNALLING_IN_SKELETAL_DYSPLASIAS_up	0.000265252	0.00422266	0.642543	2.60229	0	58	INHBA, SMAD7, FBN1, SKIL, NOG, SMAD2, SERPINE1, CREBBP, THBS1, SMAD4, RUNX3, LEF1, SMAD3, IFNG, ITGB6, ZEB2, ENG, FKBP1A, FST, WNT1, STAT3, BAMBI, LTBP1, TGFBR2, LTBP3, SKI, RUNX2, JAK1, FOS, TGFBR1, SPP1	Up-regulated
26	PETRETTO_CARDIAC_HYPERTROPHY_up	0.000252972	0.00422266	0.72394	2.60155	0	34	ASPN, FN1, LOXL1, MFAP5, ACTA2, EFEMP1, FBN1, OGN, TAGLN, OSBPL8, IGFBP3, FSTL1, NID1, DDX3X, ANXA1, ACTB, LTBP3, ARID5B, RTN4	Up-regulated
27	HOSHIDA_LIVER_CANCER_SUBCLASS_S1_up	0.000340252	0.00422266	0.511538	2.59858	0	225	LOX, GNAI2, RAB31, LUM, POSTN, IFI16, LGALS1, ALOX5AP, THY1, TCF4, ACTA2, COL3A1, CD74, CYP1B1, COL1A2, EFEMP1, CD53, FBN1, VCAN, MGP, DAB2, MFAP1, LAPTM5, C1QB, PTPRC, COL6A1, HIF1A, TAGLN, LAMB1, SMAD2, HLA-DOA, ARHGDIB, COL11A1, C3AR1, GLIPR1, IGFBP5, CXCR4, LMO4, NPC2, GYPC, ATP6V0B, AEBP1, PAPSS1, CD48, PPP4R1, SLC2A5, LCP1, GEM, ANXA5, COL6A2, S100A11, PROCR, FLNA, ANXA1, TRAF3, PLAUR, PAM,…	Up-regulated
28	WONG_ENDMETRIUM_CANCER_dn	0.000274801	0.00422266	0.607237	2.5856	0	75	GLT8D2, DCN, PDGFRA, SFRP4, TRPC1, COL3A1, EFEMP1, FBN1, OGN, MME, VGLL3, LDB2, CD248, TRO, FBXO32, CRISPLD2, NID1, LMOD1, NDN, MICU3, FLRT2, EMILIN1, ADGRD1, GNLY, TSHZ3, FOXL2, KIF26A, ATP8A2, PID1, SLC24A3, ECM2, SCARA5, DPP6, TCEAL7, PLEKHH2, IGFBP6, RUNX1T1, CNRIP1	Up-regulated
30	REACTOME_ECM_PROTEOGLYCANS_up	0.000277008	0.00422266	0.599452	2.55782	0	76	COL6A3, ASPN, BGN, TGFB3, FN1, LAMA2, DCN, LUM, COL3A1, SPARC, COL1A2, VCAN, COL6A1, LAMB1, ITGB1, SERPINE1, TGFB2, ITGAV, COL1A1, ITGB6, COL6A2, COL5A1, HSPG2, ITGA8, MATN3, ITGAX, FMOD, ITGB5, BCAN, TNC, MATN1, APP, COL9A2, LAMA1, TNXB, COL4A1, NCAN	Up-regulated
31	WP_MIRNA_TARGETS_IN_ECM_AND_MEMBRANE_RECEPTORS_up	0.000241429	0.00422266	0.794946	2.53222	0	21	COL6A3, FN1, COL3A1, COL1A2, COL6A1, ITGA11, THBS1, THBS2, SDC2, ITGB6, COL6A2, COL5A1	Up-regulated
32	LINDGREN_BLADDER_CANCER_CLUSTER_2A_dn	0.000304878	0.00422266	0.536913	2.51925	0	130	CYBRD1, MBNL1, EVI2A, DCBLD2, SGCB, UBE2E2, DAB2, GABARAPL1, PPP6C, MT2A, C3AR1, ARL4C, GLIPR1, BACE1, RCAN2, RNF38, PMP22, LMO2, CNN3, GRAMD1A, ALCAM, DDX3Y, NGRN, MT1X, ANXA5, RIMKLB, ZFAND5, GNG10, FUBP3, DNAJB9, MYO5A, IQGAP2, MT1L, LIG4, SDCBP, CYBB, CELF2, AK1, CDK5RAP2, SLC31A2, LYZ, PSMB7, AFAP1L1, UGCG, SGK1, PALLD, MS4A4A, CFL2, TOX2, CLIC4, TGFBR1, ERP44, GSN	Up-regulated
34	NADLER_OBESITY_up	0.000265252	0.00422266	0.619806	2.51021	0	58	BGN, POSTN, ALOX5AP, BASP1, CD53, LAPTM5, C1QB, CTSK, SERPINF1, CD68, UCP2, PLTP, DUSP1, CRYAB, PLIN2, SELPLG, COL1A1, CTSA, MT1X, LRP1, FLNA, PSAP, DAD1, FCGR2A, TPM4, HCLS1, DYNLT1	Up-regulated
35	HOLLERN_EMT_BREAST_TUMOR_up	0.000308547	0.00422266	0.531122	2.50871	0	135	PRRX1, FN1, MEDAG, DCN, LOXL1, PDGFRA, VSIG4, NRP2, EMP3, ZEB1, GPR34, EFEMP2, PLXND1, DAB2, WNK1, LAMB1, SCARA3, FKBP7, APBB2, GLIPR1, ANGPTL2, CFH, ITGA5, HTRA3, VEGFC, LRP1, SPI1, MXRA8, OTUD7B, MRAS, CFP, SNX9, IKBIP, SH3GLB1, LPAR1, HSPG2, NFATC1, CELF4, FCRL2, CSGALNACT2, TGFBR2, ZFPM2, NAAA, CYSLTR1, ADPRH, OSR1, FCGR2B, FLNC, CFL2, VIM, GPR85, SEC23A, FAM167B	Up-regulated
36	KEGG_SYSTEMIC_LUPUS_ERYTHEMATOSUS_up	0.00026476	0.00422266	0.62718	2.50267	0	55	C3, HLA-DPA1, CD28, C1QB, C1S, C1R, HLA-DOA, HLA-DRA, HLA-DQA1, FCGR2C, HLA-DMB, C7, IFNG, FCGR3B, FCGR3A, C4A, C4B, C1QC, HLA-DPB1, TRIM21, FCGR2A, HLA-DQB1, ACTN1, C6, SNRPD1, FCGR2B, HLA-DOB, HLA-DRB1	Up-regulated
37	ONDER_CDH1_SIGNALING_VIA_CTNNB1_up	0.000276778	0.00422266	0.574134	2.4975	0	83	PRRX1, COL6A3, BGN, MFAP2, POSTN, SCG5, FBLN5, ACTA2, C3, COL1A2, FBN1, VCAN, TAGLN, SEMA3C, ANOS1, IGFBP3, NREP, SERPINE1, FERMT2, GREM1, IGFBP7, SPOCK1, DOCK10, LTBP2, BEX4, KDELR3, PRUNE2, CADM3, TPM1, IFIH1, MYL9, LTBP1, TNFAIP3, ICAM1, CD83	Up-regulated
38	VERHAAK_GLIOBLASTOMA_MESENCHYMAL_up	0.00034188	0.00422266	0.497933	2.49625	0	209	LOX, COPZ2, FPR3, CYBRD1, LGALS1, SRPX2, PLS3, EMP3, LY96, TIMP1, MSR1, MYOF, EFEMP2, DSE, COL1A2, DCBLD2, SLC11A1, DAB2, LAPTM5, SWAP70, PTPRC, BNC2, LAMB1, CPQ, NRP1, SEC24D, HK3, CLEC2B, UCP2, SERPINE1, THBS1, NPC2, FNDC3B, ITGA5, CASP4, TLR4, COL1A1, WWTR1, CSTA, LCP1, S100A11, PROCR, COL5A1, ANXA1, LAIR1, ENG, PLAUR, LTBP2, C5AR1, IQGAP1, CYTIP, COL8A2, CLCF1, PTPN6, VAMP5, RAB32, ARHGAP29, …	Up-regulated
39	REACTOME_EXTRACELLULAR_MATRIX_ORGANIZATION_up	0.000378501	0.0043713	0.475877	2.49469	0	298	LOX, COL6A3, ASPN, BGN, TGFB3, FN1, COL10A1, LAMA2, DCN, LOXL1, LUM, MFAP2, MMP14, MFAP5, TIMP1, FBLN5, COL3A1, EFEMP2, JAM2, SDC1, ADAMTS4, SPARC, COL1A2, EFEMP1, FBN1, VCAN, ADAMTS16, MFAP1, COL6A1, LAMB1, CTSK, ITGA11, VCAM1, COL11A1, ITGB1, COL24A1, MMP9, SERPINE1, NID2, COL14A1, TGFB2, THBS1, ITGA5, ADAMTS1, CAPN14, ITGAV, NID1, COL1A1, HTRA1, SDC2, MMP2, ITGB6, COL6A2, COL5A1, CRTAP, COL17A…	Up-regulated
41	RIGGI_EWING_SARCOMA_PROGENITOR_dn	0.000327011	0.00422266	0.505636	2.49324	0	181	PRRX1, GLT8D2, COL10A1, DCN, BICC1, PDGFRA, LUM, LXN, GXYLT2, SFRP4, GFPT2, SLC12A8, NRP2, ETV1, PIEZO2, PSD3, HLA-DPA1, VCAN, SLIT3, MME, C1S, GULP1, BNC2, C1R, CLU, SCARA3, FHOD3, NRP1, NREP, ZNF521, COL14A1, BACE1, PTGIS, DPYD, DPYSL3, RNF24, SLC2A5, PDE1A, SCRG1, ECM1, COL6A2, SVEP1, GLCCI1, HAS3, PLPP3, IL13RA2, PTGS1, NR1D2, FGF7, SPON1, KITLG, SNX9, FST, IFT80, MAB21L2, VEPH1, DUSP4, ADAM1…	Up-regulated
42	NAKAMURA_ADIPOGENESIS_LATE_dn	0.000252972	0.00422266	0.688837	2.47541	0	34	LOX, POSTN, ABI3BP, GLIPR1, SERPINE1, CALD1, THBS2, TMEM47, SMAD3, ITGAV, DKK3, MYH11, HCK, IER2, TPM1, NT5E, SRPK2, EDIL3, CXCL12	Up-regulated
43	REACTOME_ASSEMBLY_OF_COLLAGEN_FIBRILS_AND_OTHER_MULTIMERIC_STRUCTURES_up	0.000265887	0.00422266	0.607308	2.47455	0	60	LOX, COL6A3, COL10A1, LOXL1, COL3A1, COL1A2, COL6A1, COL11A1, COL24A1, MMP9, COL14A1, COL1A1, COL6A2, COL5A1, COL17A1, COL8A2, DST, PLEC, LOXL4, ITGB4	Up-regulated
44	SERVITJA_ISLET_HNF1A_TARGETS_up	0.000319693	0.00422266	0.508404	2.46575	0	162	BGN, TGFB3, POSTN, SNAI2, LGALS1, MMP14, THY1, PLA2G4A, COL3A1, CYP1B1, EFEMP2, SDC1, EFEMP1, FBN1, PLXND1, LAPTM5, DPT, C1QB, COL6A1, C1S, SCARA3, AKAP12, ARHGDIB, SPARCL1, VCAM1, MEIS2, ZFHX4, NTM, ZNF521, TGFB2, HLA-DQA1, PMP22, THBS2, TMEM47, DCLK1, AEBP1, SMAD3, RHOC, HTRA1, KCNIP4, MAF, DKK3, PROCR, MAP4, NRSN1, ANXA1, CNR1, PNLIPRP2, C1QC, FST, KCND2, FGF13, GAB1, LY6H, LYZ, CXCL12, RBMS3	Up-regulated
45	REACTOME_COMPLEMENT_CASCADE_up	0.000286451	0.00422266	0.546485	2.4656	0	100	IGHG4, IGKV1-33, C3, IGLV1-40, C1QB, IGKV1-5, C1S, C1R, CLU, IGKV2-28, C3AR1, IGKV3-11, IGKV3-15, IGLV1-47, CFH, IGKV2D-28, CD59, IGKV1D-33, IGKV4-1, C7, CR1, IGKV1D-12, IGKV1D-39, IGKV1D-16, IGHV2-70, C5AR1, IGLV3-19, C4A, C4B, IGLV3-27, CFP, C1QC, IGHV4-59, MASP2, IGKV3D-20, CD55, SERPING1, IGLC3, CFHR5, C6, IGLV2-11, IGKV1-12, CFI, IGHV4-39, IGKV3-20, IGKV1-39	Up-regulated
46	PID_INTEGRIN1_PATHWAY_up	0.000268384	0.00422266	0.592843	2.45858	0	65	COL6A3, FN1, LAMA2, COL3A1, JAM2, COL1A2, FBN1, COL6A1, LAMB1, ITGA11, VCAM1, COL11A1, ITGB1, THBS1, ITGA5, THBS2, ITGAV, NID1, COL1A1, COL6A2, COL5A1, PLAUR, MDK	Up-regulated
47	LINDGREN_BLADDER_CANCER_HIGH_RECURRENCE_up	0.000261986	0.00422266	0.630591	2.45391	0	48	PRRX1, LGALS1, NRP2, ABI3BP, SPARC, COL1A2, VCAN, MGP, VCAM1, NID2, AEBP1, HTRA3, CSRP1, IL7R, ADAM19, MYL9, MYADM	Up-regulated
48	LINDVALL_IMMORTALIZED_BY_TERT_dn	0.000274048	0.00422266	0.582932	2.44508	0	70	FN1, CCDC80, ANTXR1, FAP, VCAN, CPXM2, SLIT3, EGR1, DPT, SLC43A3, CTSK, AKAP12, ARL4C, CDON, EIF2B3, FBXO32, TMEM47, SELPLG, LRRC15, LTBP2, PLPP3, HSPG2, PLOD2, CELF2, FMOD, FNDC1, ADAM12, VPS26B, SH3PXD2B, LHFPL2, ITGB5	Up-regulated
49	MCLACHLAN_DENTAL_CARIES_up	0.000351124	0.00424567	0.475604	2.43568	0	243	RAB31, ALOX5AP, SFRP4, LY96, TIMP1, INHBA, MSR1, CD74, EVI2A, C3, CD53, HLA-DPA1, MGP, CHST15, LAPTM5, C1QB, PTPRC, HLA-DRA, ARHGDIB, VCAM1, MT2A, C3AR1, CD163, ANGPTL2, CXCR4, CLEC2B, MMP9, UCP2, IGKV1D-13, MNDA, HLA-DQA1, IGHV4-61, S100A9, IGKV2D-28, MS4A6A, CTSH, IGKV4-1, CD84, DDX3Y, HLA-DMB, CD48, MT1X, LCP1, FCGR3B, IGKV1D-39, SLC2A3, LRRC15, PLAUR, RPS4Y1, TNFAIP6, SKAP2, C5AR1, CYTIP, IGK…	Up-regulated
50	BURTON_ADIPOGENESIS_8_up	0.000277008	0.00422266	0.567047	2.41955	0	76	LOX, RAB31, GBA, EMP3, ACTA2, OGN, PHLDB2, SERPINF1, CPQ, VCAM1, PLTP, PTGIS, CMTM3, ITGAV, CTSA, EMP1, GNB1, ANXA5, GNG10, FGF7, KDELR3, PSAP, CD99, TPBG, ASAH1, PLA2G7, PRDX4, SKI, MYH9, PDPN, FAM91A1, PLXNB2, LAMP2, VCL, APP	Up-regulated
51	NABA_CORE_MATRISOME_up	0.00036245	0.00428844	0.4671	2.4172	0	265	COL6A3, ASPN, BGN, CTHRC1, FN1, COL10A1, LAMA2, DCN, LUM, MFAP2, POSTN, SRPX2, MFAP5, FBLN5, OMD, COL3A1, MXRA5, EFEMP2, ABI3BP, SPARC, COL1A2, EFEMP1, FBN1, VCAN, MGP, SLIT3, OGN, MFAP1, DPT, COL6A1, LAMB1, SPARCL1, COL11A1, ANOS1, EPYC, IGFBP3, IGFBP5, COL24A1, NID2, COL14A1, THBS1, ESM1, THBS2, CRISPLD2, AEBP1, NID1, COL1A1, THSD4, ECM1, COL6A2, SVEP1, IGFBP7, COL5A1, SPOCK1, COL17A1, LTBP2, T…	Up-regulated
52	BERTUCCI_MEDULLARY_VS_DUCTAL_BREAST_CANCER_dn	0.000321958	0.00422266	0.497117	2.41062	0	163	COPZ2, EDNRA, BGN, LAMA2, SNAI2, SRPX2, RUNX1, PTPN14, ACTA2, MPRIP, FAP, SLIT3, PICALM, TTC28, TAGLN, ACVR1, SLX4IP, ZCCHC24, FSTL1, H19, RGS4, CALD1, PDE5A, KANK2, FBXO32, GUCY1A2, FERMT2, ANO1, EMC3, KCTD1, SNRPN, FLNA, EXTL2, SPOCK1, LIN28A, ZNF385D, MXRA8, PTPRZ1, C20orf194, SH3PXD2A, SEMA5A, HSPG2, ADAM12, MYL9, KCNMB1, AQP1, PRICKLE1, CADM1, ITGB5, ACTN1, MYH9, ZNF20, FLNC, COL8A1, RTN4, M…	Up-regulated
53	IGLESIAS_E2F_TARGETS_up	0.000311624	0.00422266	0.505376	2.40895	0	143	COL6A3, GNAI2, DCN, LUM, MFAP2, POSTN, LGALS1, ACTA2, COL3A1, CD74, C3, SPARC, COL1A2, CD53, OGN, DAB2, LAPTM5, C1QB, CLK1, LAPTM4A, SERPINF1, TMEM45A, ANGPTL2, IGFBP5, ITGB1, NID2, MORF4L1, PMP22, SS18, CNN3, COL1A1, LIMS1, ITM2B, EMP1, LCP1, GNB1, COL6A2, S100A11, CRTAP, ZFAND5, CDC42, KITLG, C1QC, CSRP1, AP4S1, AKIRIN2, NPTN, NFKBIA, LYZ, UGDH, CADM1, SKP1	Up-regulated
54	WAMUNYOKOLI_OVARIAN_CANCER_GRADES_1_2_dn	0.000276472	0.00422266	0.570759	2.40583	0	72	BASP1, SULF1, NISCH, C3, DAB2, TTC28, RHOQ, PLSCR4, ATP2B4, ELOVL5, MNDA, DPYD, CPE, RGL1, DOCK11, PROCR, BNIP3, PTGS1, C4A, FLRT2, PARP6, WSB1, CELF2, SERPING1, N4BP2L2, ZNF641, GAS1, IFITM2, IGFBP6, CFI, CTDSP2	Up-regulated
56	LAIHO_COLORECTAL_CANCER_SERRATED_up	0.000289939	0.00422266	0.527888	2.39699	0	105	POSTN, LGALS1, EMP3, ARPP19, TCF4, PLA2G4A, BNIP3L, SPARC, EMC7, SGCB, SEC24A, MFAP1, CSRP2, C1S, HIF1A, LAMB1, PDLIM5, NOP10, PMP22, DPYD, EMC3, ATP6V0E1, EMP1, ANXA5, RASSF2, PAM, IQGAP1, CSNK1A1, SDCBP, CNIH4, DAD1, SEC62, MYL6, IL6ST, NPTN, MACF1, PALLD, C5orf15, HLA-DRB1, CTSB, B2M, ORMDL2, BCAP29, PRNP, PRKAR1A, RBM34, MBD4, ANP32E	Up-regulated
57	THUM_SYSTOLIC_HEART_FAILURE_up	0.000427533	0.00464248	0.441386	2.38852	0	398	PRRX1, PLXDC2, ASPN, CTHRC1, LOXL1, LXN, FPR3, ITGBL1, VSIG4, ALOX5AP, SFRP4, SRPX2, RDX, LY96, OMD, PLA2G4A, MSR1, ETV1, CD74, ZEB1, GPR34, ANGPT2, CD53, SGCB, HLA-DPA1, VCAN, SLC11A1, PICALM, ANKRD12, LAPTM5, DPT, PLSCR4, C1QB, PTPRC, VGLL3, C1S, NOX4, LPAR6, HLA-DRA, SCARA3, GPX8, ARHGDIB, VCAM1, TMEM45A, IGFBP3, BCAT1, APBB2, C3AR1, ANGPTL1, CXCR4, CLEC2B, ITGB1, SLC9A9, TLR7, RGS4, THBS1, MO…	Up-regulated
59	BASSO_HAIRY_CELL_LEUKEMIA_up	0.000279252	0.00422266	0.558077	2.38285	0	77	MFAP5, TIMP1, MYOF, FGFR1, PTPRM, IGFBP3, THBS1, DPYD, PTTG1IP, WWTR1, EMP1, MAF, ANXA1, ARRB2, ENG, PLXNC1, GAS7, DST, TBKBP1, PLOD2, ACTB, GABARAPL2, TCF7L2, CD63, RTN2, CAMTA1, FLT3, CCND1, RNF11, FGF2, KCTD12, B2M	Up-regulated
60	BOQUEST_STEM_CELL_CULTURED_VS_FRESH_dn	0.000249938	0.00422266	0.682544	2.37476	0	30	APOD, PDGFRL, OMD, C3, OGN, DPT, SPARCL1, RGCC, C7, NTRK2, FABP4, NAALAD2	Up-regulated
61	MOROSETTI_FACIOSCAPULOHUMERAL_MUSCULAR_DISTROPHY_up	0.000240154	0.00422266	0.769214	2.37235	0	19	COL6A3, PDGFRA, LXN, POSTN, SCG5, ID2, ADGRL2, EBF2, THBS2, NID1	Up-regulated
62	GU_PDEF_TARGETS_up	0.000274048	0.00422266	0.562399	2.35896	0	70	COL6A3, FN1, SNAI2, TCF4, ZEB1, SDC1, COL6A1, HIF1A, SMAD2, SERPINE1, ITGA5, SMAD4, LEF1, SMAD3, COL1A1, SDC2, MAPKBP1, DKK3, COL6A2, VEGFB, COL5A1, DOCK10, SERPIND1, SERPINB3	Up-regulated
63	WP_HYPOTHESIZED_PATHWAYS_IN_PATHOGENESIS_OF_CARDIOVASCULAR_DISEASE_up	0.00024325	0.00422266	0.711081	2.355	0	24	POSTN, ANGPT2, FBN1, SMAD2, SERPINE1, SMAD4, SMAD3, FLNA, ENG, LTBP2, LTBP1, MAPK1, TGFBR2, RUNX2, TGFBR1	Up-regulated
65	WP_MIR5093P_ALTERATION_OF_YAP1ECM_AXIS_up	0.000237812	0.00422266	0.78355	2.34901	0	17	EDNRA, FN1, SNAI2, COL3A1, SPARC, THBS2, COL1A1, COL5A1	Up-regulated
66	FLECHNER_BIOPSY_KIDNEY_TRANSPLANT_REJECTED_VS_OK_up	0.000277778	0.00422266	0.537277	2.34423	0	84	COL6A3, RAB31, VSIG4, CD53, RGS10, LAPTM5, C1QB, PTPRC, CD163, GLIPR1, CXCR4, MMP9, CD48, CSTA, GMFG, LCP1, UBC, RASSF2, EIF2AK2, FCGR3A, CELF2, IL10RB, UBE2L6, HCLS1, RBMS1, IL10RA, LST1, GBP2, APOC1	Up-regulated
67	HELLEBREKERS_SILENCED_DURING_TUMOR_ANGIOGENESIS_up	0.000277008	0.00422266	0.548001	2.33828	0	76	TSPAN2, INHBA, ABI3BP, FBN1, VCAN, COL6A1, TAGLN, CLU, TMEM45A, IGFBP3, UCP2, NPC2, CPE, ITM2B, LRP1, DKK3, IGFBP7, FTH1, FAT1, CDKN1A, FABP4, ASAH1, MX1, EDIL3, TNFAIP3, ICAM1, CADM1, MEFV, TACSTD2, P3H2, CTSB, QSOX1	Up-regulated
68	SWEET_KRAS_TARGETS_up	0.000279252	0.00422266	0.54716	2.33624	0	77	SPARC, C1S, TAGLN, GABARAPL1, IGFBP3, GLIPR1, ATP2B4, NLRP1, SERPINE1, TGFB2, CALD1, MSC, FERMT2, ITGAV, COL1A1, SLC16A4, DKK3, IGFBP7, COL5A1, SPOCK1, PMEPA1, FLRT2, HSPG2, TPM1, ADAM19, MYL9, CADM1, INPP4B, SGK1, PALLD, JUNB, JAK1, EVL, LAMP2, TIMP3, NPTX1, SERPINE2, COL4A1, HSPB1, SOX4, P4HA2, MAP3K8, ACKR3	Up-regulated
69	WESTON_VEGFA_TARGETS_6HR_up	0.000261986	0.00422266	0.598471	2.32892	0	48	COL6A3, BGN, POSTN, THY1, COL1A2, FAP, VCAN, MGP, COL6A1, C1S, NID2, HTR2B, MMP2, GEM, ROR2, SHC3, SEMA5A	Up-regulated
70	JI_CARCINOGENESIS_BY_KRAS_AND_STK11_dn	0.000237812	0.00422266	0.776815	2.32882	0	17	FN1, DCN, LOXL1, LUM, ITGBL1, TIMP1, FGFR1, THBS2, VEGFC, MMP2	Up-regulated
71	KAYO_CALORIE_RESTRICTION_MUSCLE_up	0.000283126	0.00422266	0.524029	2.32409	0	92	XGY2, COL6A3, FN1, LAMA2, LUM, EMP3, COL3A1, COL1A2, FAP, C1QB, GDI1, CNN3, COL1A1, LRP1, S100A11, FLNA, RASSF2, ENG, CHKB, CALB2, LIMK1, IER2, HSPG2, NAGLU, ACTB, HCLS1, RASA2, TGFBR2, CCR5, CALB1, KRT12, MYH9, RYK, CYB5R3, GAS1, APP, NR4A3, DHX38, ARCN1	Up-regulated
74	TOMLINS_PROSTATE_CANCER_dn	0.000255297	0.00422266	0.631229	2.31208	0	37	MYOF, CLU, AKAP12, MEIS2, ATP2B4, PMP22, C7, ZNF516, CYLD, SCRN1, DST, MEIS1, ITGB4, HMGN4, SEC23A, GAS1, GSN, VCL	Up-regulated
76	PASINI_SUZ12_TARGETS_dn	0.000384763	0.00439828	0.440479	2.30764	0	301	FN1, LGALS1, TSPAN2, MMP14, SULF1, ACTA2, ID2, COL3A1, CYP1B1, SDC1, COL1A2, EFEMP1, DCBLD2, VCAN, CRMP1, SKIL, ERRFI1, MEG3, VGLL3, WNK1, TAGLN, PHLDB2, SEMA3C, PHC2, PDLIM5, COL11A1, IGFBP3, NREP, ARL4C, IGFBP5, ITGB1, KLF7, PKIA, DUSP1, TGFB2, THBS1, CALD1, GLI3, PMP22, CMTM3, TMEM47, F3, CPE, CRYAB, BACH2, CMTM7, PLIN2, ITGAV, COL1A1, WWTR1, DOCK11, DUSP14, MEG8, ANXA5, CITED2, SH3BGRL, FLNA,…	Up-regulated
77	YANAGIHARA_ESX1_TARGETS_up	0.000250878	0.00422266	0.667999	2.30379	0	29	PIP5K1A, MAP4K5, DAB2, TGFB2, SS18, RASAL2, DYNC2H1, CRTAP, PCLO, NEXN, ARHGAP29, IL6ST, SRSF11, GNS, INPP4B, BDNF-AS	Up-regulated
81	REACTOME_CHONDROITIN_SULFATE_BIOSYNTHESIS_up	0.000239177	0.00422266	0.723893	2.27698	0	20	BGN, DCN, CHST11, VCAN, CHST15, CHST9, CHSY1, CSGALNACT2, BCAN	Up-regulated
83	CHIANG_LIVER_CANCER_SUBCLASS_CTNNB1_dn	0.000322997	0.00422266	0.467322	2.27146	0	166	COL6A3, ASPN, BGN, CTHRC1, LOXL1, LUM, LXN, CCDC80, BASP1, SULF1, TIMP1, COL3A1, MXRA5, CHST11, EVI2A, COL1A2, EFEMP1, VCAN, GLIS3, EGR1, GPR183, TMEM45A, RGS1, GDA, MMP9, PLTP, SERPINE1, RCAN2, PMP22, CMTM3, THBS2, F3, ADAMTS1, GCH1, AEBP1, TRNP1, COL1A1, C7, WWC1, NCALD, GEM, COL5A1, RASGRP1, CYTIP, CDA, KCNT2, IGLL3P, RDH12, IL7R, MYO1E, MYL9, TNFSF4, CXCL12, UGCG, STAT4, PAG1	Up-regulated
84	VERRECCHIA_EARLY_RESPONSE_TO_TGFB1_up	0.000265111	0.00422266	0.573382	2.26905	0	53	COL6A3, FN1, MMP14, TIMP1, COL3A1, SPARC, COL1A2, VCAN, RHOQ, COL6A1, IGFBP3, IGFBP5, SERPINE1, CD59, NID1, RHOC, LRP1, PCDHGC3, ADAM9, ZYX, HSPG2, LRRC17, TCF7L2, ICAM1, CDH6, ITGB5	Up-regulated
85	CHARAFE_BREAST_CANCER_BASAL_VS_MESENCHYMAL_dn	0.000525486	0.00502717	0.578972	2.26648	1	50	GFPT2, ZEB1, MB21D2, TTC28, GULP1, SHOX2, ZCCHC24, BCAT1, GNG11, CMTM3, RBM24, AK5, ALPK2, COL6A2, TRAF3, TRIO, CD99, PDCL3, EDIL3, UTRN, FLNC	Up-regulated
86	WP_REGULATION_OF_WNTBCATENIN_SIGNALING_BY_SMALL_MOLECULE_COMPOUNDS_up	0.000237812	0.00422266	0.752114	2.25476	0	17	SFRP4, TCF4, GSK3B, LEF1, LRP1, DKK3, CSNK1A1, WNT1	Up-regulated
87	CROMER_TUMORIGENESIS_up	0.000530504	0.00502717	0.555941	2.25156	1	58	FN1, LUM, MFAP2, POSTN, THY1, COL3A1, SPARC, COL1A2, FAP, COL11A1, MMP9, SERPINE1, SLC2A3, LRRC15, PFN2, TNFAIP3, ACTN1, PDPN, TNC, SPP1, CCL3, NELL2	Up-regulated
88	KEGG_LEISHMANIA_INFECTION_up	0.000274048	0.00422266	0.5359	2.24781	0	70	TGFB3, C3, HLA-DPA1, HLA-DOA, HLA-DRA, ITGB1, TGFB2, TAB2, HLA-DQA1, TLR4, FCGR2C, HLA-DMB, IFNG, FCGR3B, CR1, IFNGR2, JAK2, FCGR3A, PTPN6, HLA-DPB1, TRAF6, NFKBIA, NCF1, FCGR2A, MAPK1, HLA-DQB1, JAK1, FOS, HLA-DOB, HLA-DRB1, IL1A	Up-regulated
89	BIOCARTA_TGFB_PATHWAY_up	0.000240154	0.00422266	0.728297	2.24616	0	19	TGFB3, SMAD7, SKIL, SMAD2, CREBBP, TGFB2, SMAD4, SMAD3, TGFBR2, TGFBR1	Up-regulated
90	SMID_BREAST_CANCER_LUMINAL_A_up	0.000277778	0.00422266	0.514473	2.24473	0	84	ASPN, LAMA2, SFRP4, RUNX1, OMD, PSD3, OGN, DPT, ABCA8, SCUBE2, COL14A1, DUSP1, PCSK5, RTN1, MAOA, LMOD1, SVEP1, CHRDL1, RBP4, PDCD4, MYH11, FABP4, LRRC17, LEPR, ZBTB16, NAT1	Up-regulated
92	PID_INTEGRIN5_PATHWAY_up	0.000237586	0.00422266	0.761689	2.23892	0	16	FN1, SDC1, FBN1, VCAM1, ITGAV, ITGB6, PLAUR, EDIL3, ITGB5, TGFBR1	Up-regulated
93	ZWANG_CLASS_2_TRANSIENTLY_INDUCED_BY_EGF_up	0.000524384	0.00502717	0.574351	2.2377	1	49	GFPT2, INHBA, JAM2, ERRFI1, EGR1, CLIC3, CLK1, TAGLN, BLID, FSTL1, GLIPR1, PXDC1, RGCC, F3, RNF24, CITED2, ZNF189, CLCF1, ARHGAP29, LY6G6C, OSR1	Up-regulated
94	CHIARADONNA_NEOPLASTIC_TRANSFORMATION_KRAS_CDC25_dn	0.000529241	0.00502717	0.569041	2.23558	1	51	LOX, LOXL1, LXN, CCDC80, CYP1B1, C3, MGP, MEG3, VCAM1, NID1, CRTAP, LTBP2, EIF2AK4, STAT3, FOXP1, OSMR, LY6H, IL1RL1, CXCL12, ZFP36, EMB, TNC, CDO1, FOS	Up-regulated
95	RODWELL_AGING_KIDNEY_NO_BLOOD_up	0.00034118	0.00422266	0.445243	2.23103	0	207	COL6A3, CTHRC1, FN1, LOXL1, LUM, TIMP1, ANTXR1, INHBA, MSR1, MYOF, COL3A1, ABI3BP, C3, COL1A2, BHLHE41, FBN1, ARHGAP1, C1QB, C1S, TAGLN, C1R, GPX8, SPARCL1, VCAM1, ZCCHC24, RGS1, COL14A1, VASH2, AEBP1, COL1A1, ALPK2, VEGFC, C7, ITGB6, DEGS1, DKK3, MAP4, COL5A1, ANXA1, ZEB2, PAM, TMEM200A, MTHFD1L, GGT5, HOMER3, SPON1, C4A, MRAS, GABBR1, C1QC, FCAMR, RFTN1, TPBG, TPM1, OSMR, UBE2Z, PLK2, PRICKLE1,…	Up-regulated
97	HAN_JNK_SINGALING_up	0.000252972	0.00422266	0.619028	2.22454	0	34	LOX, RUNX1, ZEB1, DPT, SHOX2, ANGPTL2, DUSP1, IRGM, FOXP1, IL1RL1, PLEKHO1, SGK1, IFI27L2, TNC	Up-regulated
98	ONO_AML1_TARGETS_dn	0.000258465	0.00422266	0.596162	2.22439	0	40	CXCR4, SLFN12L, RUNX3, CASP4, TNFSF8, CD84, SLAMF6, GPR83, SOCS2, IL17RA, IRF4, TNFRSF18, LY6H, CCR5, RUNX2, IL21, PARP1	Up-regulated
99	WILCOX_RESPONSE_TO_PROGESTERONE_dn	0.000265463	0.00422266	0.542573	2.22126	0	61	FN1, INHBA, COL1A2, MGP, MME, COL6A1, COL11A1, IGFBP3, ATP2B4, IGFBP5, NTM, THBS1, COL1A1, CSTA, MMP2, CATSPERB, PCDHGC3, COL8A2, DST, PLEC, MYH1, MYL9, NOX3, PECAM1, NBPF10, IGLL1, CLIC4, CCND1	Up-regulated
100	SCHAEFFER_PROSTATE_DEVELOPMENT_48HR_dn	0.000431034	0.00464248	0.408896	2.21255	0	400	PRRX1, EDNRA, TGFB3, ABCC9, LOXL1, MFAP2, SLCO2B1, TSPAN2, RUNX1, CCDC80, NRP2, SULF1, PRKD3, ANTXR1, INHBA, QPCT, MAP4K5, TCF4, LMO3, ZEB1, ENTPD4, C9orf72, CPXM2, HIVEP2, DAB2, EPHB1, JUND, LDB2, ANKRD6, BTD, SERPINF1, SPARCL1, BCAT1, GPM6B, ARL4C, CD248, LHPP, IRF2BPL, KLF7, ZNF521, THBS1, STK3, TSPYL5, MAB21L3, GYPC, MSX2, NR4A2, BACH2, RAB3B, PAPSS1, PPM1A, TIAM2, KCTD1, CDC42EP3, FEM1B, CDK…	Up-regulated
101	REACTOME_PARASITE_INFECTION_up	0.000287604	0.00422266	0.487906	2.20865	0	102	IGHG4, IGKV1-33, IGLV1-40, IGKV1-5, IGKV2-28, IGKV3-11, IGKV3-15, IGLV1-47, NCKAP1, IGKV2D-28, IGKV1D-33, IGKV4-1, ELMO2, ELMO1, VAV1, IGKV1D-12, IGKV1D-39, IGKV1D-16, IGHV2-70, MYO5A, CDC42, ARPC3, FCGR3A, IGLV3-19, IGLV3-27, HCK, ACTR3, IGHV4-59, ACTB, IGKV3D-20, MAPK1, MYO1C, IGLC3, WASL, MYH9, WASF2, IGLV2-11, IGKV1-12, IGHV4-39, IGKV3-20, IGKV1-39, ACTG1, BTK, WAS	Up-regulated
102	REACTOME_ANTIGEN_ACTIVATES_B_CELL_RECEPTOR_BCR_LEADING_TO_GENERATION_OF_SECOND_MESSENGERS_up	0.000273224	0.00422266	0.521523	2.20852	0	73	IGKV1-33, TRPC1, IGLV1-40, PLCG2, IGKV1-5, IGKV2-28, IGKV3-11, IGKV3-15, IGLV1-47, IGKV2D-28, IGKV1D-33, IGKV4-1, VAV1, IGKV1D-12, IGKV1D-39, IGKV1D-16, IGHV2-70, IGLV3-19, SOS1, IGLV3-27, PTPN6, IGHV4-59, IGKV3D-20, IGLC3, ITPR1, CD22, IGLV2-11, PIK3AP1, IGKV1-12, SH3KBP1, IGHV4-39, BLNK, IGKV3-20, IGKV1-39, PIK3R1, DAPP1, BTK	Up-regulated
103	PETROVA_ENDOTHELIUM_LYMPHATIC_VS_BLOOD_dn	0.000319081	0.00422266	0.456855	2.20704	0	158	BGN, NR2F2, SRPX2, MMP14, BASP1, EMP3, PLA2G4A, ACTA2, NISCH, COL1A2, TFEC, EFEMP1, ADGRL2, FAP, VCAN, RGS10, COL6A1, TAGLN, CLU, ARHGDIB, APBB2, ARL4C, CXCR4, PLTP, PKIA, SERPINE1, RGS4, ITGA5, CD59, SMAD3, ITGAV, PRKACB, CDC42EP3, VEGFC, MT1X, PROCR, LTBP2, TRAM2, CDKN1A, MBOAT7, SRGN, PLOD2, TPM1, MVP, PFN2, ICAM1, ITGB5, AHNAK2, GBP2, TACSTD2, COL8A1	Up-regulated
104	BIOCARTA_NKT_PATHWAY_up	0.00024564	0.00422266	0.661552	2.20689	0	25	TGFB3, CD28, CXCR4, TGFB2, IFNG, IFNGR2, CCR3, CCR1, IL5, CCR4, CCR5, CCL3	Up-regulated
105	DORSEY_GAB2_TARGETS_up	0.000249938	0.00422266	0.634058	2.20606	0	30	COL6A3, SMAD7, SPARC, ACVR1, AKAP12, SERPINE1, THBS1, GNG11, CRYAB, COL1A1, IL13RA2, GRIK1, TNFRSF9, GSN, TFPI2	Up-regulated
106	GAUSSMANN_MLL_AF4_FUSION_TARGETS_E_up	0.000285144	0.00422266	0.493003	2.20414	0	96	SFRP2, ASPN, CTHRC1, MEDAG, PDGFRA, POSTN, SFRP1, PDGFRL, SULF1, FABP3, ZC2HC1A, CYP7B1, GNRHR, C1S, CLU, MAN1C1, NREP, ADGRG2, RGCC, RCAN2, CRYAB, PROCR, SVEP1	Up-regulated
108	JECHLINGER_EPITHELIAL_TO_MESENCHYMAL_TRANSITION_up	0.000269614	0.00422266	0.529489	2.20097	0	66	DCN, PDGFRA, INHBA, COL3A1, CYP1B1, SDC1, SPARC, DAB2, COL6A1, HIF1A, LAMB1, CD68, CFH, PMP22, HTRA1, SDC2, MMP2, COL6A2, PROCR, PTGS1, C4B, VLDLR, PLA2G7, TNC, VIM, PDGFRB, GAS1, B2M, GBP4, TNXB	Up-regulated
109	ROZANOV_MMP14_TARGETS_SUBSET_up	0.000251572	0.00422266	0.615384	2.19219	0	33	FN1, EFEMP1, GJB2, PLXND1, COL6A1, HIF1A, LAMB1, ANGPTL2, CALD1, NR3C1, COL6A2, COL5A1, MDK, PTGS1, SULF2, PLOD2, CHSY1	Up-regulated
111	WP_CANONICAL_AND_NONCANONICAL_TGFB_SIGNALING_up	0.000237586	0.00422266	0.74508	2.1901	0	16	LOX, LOXL1, SMAD2, SMAD4, SMAD3, GREM1, LOXL4, BMPR2, TGFBR2, TGFBR1	Up-regulated
112	LINDSTEDT_DENDRITIC_CELL_MATURATION_D_up	0.000267881	0.00422266	0.532702	2.18509	0	62	RAB31, IFI16, IGSF6, DAB2, LAPTM4A, ARHGDIB, CLEC2B, ITGA5, ITGAV, HLA-DMB, MAF, RBMS2, ANXA1, PLPP3, ATP6V1A, SLC6A2, FGL2, CCR1, CD99, ITGAX, LST1, NAAA, ACTN1, TPP1	Up-regulated
113	BASSO_CD40_SIGNALING_up	0.000285144	0.00422266	0.486219	2.1848	0	98	LGALS1, CD74, CD58, SIK1, LAPTM5, SLAMF1, GPR183, NEFM, RGS1, CHD1, KCNN4, HLA-DQA1, LTA, UNC119, STK10, PLXNC1, IRF4, ZFP36L1, IRF5, BCL2A1, PLEK, HLA-DPB1, SRGN, NFKBIA, ELL2, TNFAIP3, ICAM1, LHFPL2, HLA-DQB1, CD83, VOPP1, JUNB, ARID5B, TNFAIP8, PTP4A3, HLA-DRB1, CCL3, NFKB2, LITAF	Up-regulated
114	WP_COMPLEMENT_AND_COAGULATION_CASCADES_up	0.000530504	0.00502717	0.538854	2.18235	1	58	C3, C1QB, C1S, C1R, CLU, C3AR1, F9, CFH, SERPINE1, F3, C7, CR1, PLAUR, C5AR1, C4B, SERPIND1, C1QC, MASP2, CD55, SERPING1, C6	Up-regulated
115	BOYAULT_LIVER_CANCER_SUBCLASS_G5_dn	0.000249563	0.00422266	0.636665	2.1805	0	28	RAB31, IFI16, EMP3, HLA-DPA1, DAB2, LAPTM5, ARHGDIB, ARL4C, CLEC2B, S100A11, HLA-DPB1, CELF2, IL10RA, ICAM1	Up-regulated
118	ALTEMEIER_RESPONSE_TO_LPS_WITH_MECHANICAL_VENTILATION_up	0.000298151	0.00422266	0.467811	2.17563	0	121	TIMP1, ADAMTS4, TFEC, VCAN, AKAP12, GDA, TRIM5, SERPINE1, THBS1, TIFA, SLFN12L, F3, IRGM, MS4A6A, CASP4, GCH1, MT1X, GEM, PLAUR, BST1, ARG2, FGL2, FPR2, SLFN12, BCL2A1, GPR65, PLEK, CCR1, CYBB, CTPS1, NFKBIA, OSMR, PLA2G7, IFIH1, FCGR2A, TNFAIP3, SLC26A4, SOD2, LST1, ST3GAL1, MEFV, GBP2, JUNB, CMPK2, IL1A, SLA, CCL3, TFPI2, GBP4	Up-regulated
119	WALLACE_PROSTATE_CANCER_RACE_up	0.000373552	0.00435909	0.4179	2.17336	0	283	CLIC2, EDNRA, VSIG4, IFI16, ALOX5AP, LY96, EVI2A, TFEC, CD53, FBN1, LAPTM5, SLAMF1, CD28, C1QB, PTPRC, STOM, DPYSL4, GPR183, CLU, HLA-DRA, RGS1, ARL4C, GLIPR1, CXCR4, ADGRG2, MMP9, UCP2, PLTP, NLRP1, GNG11, IGKV1D-13, HLA-DQA1, CMAHP, RUNX3, NR4A2, ADAMTS1, NID1, CD48, IFNG, GMFG, PTPN7, CHRDL1, HSPB8, IGKV1D-39, DOCK10, RASGRP1, C5AR1, CYTIP, IGKV1D-37, SOS1, FGL2, IGKV1OR1-1, SLFN12, BCL2A1, GP…	Up-regulated
120	AZARE_NEOPLASTIC_TRANSFORMATION_BY_STAT3_up	0.000302297	0.00422266	0.46523	2.16788	0	124	FN1, SCG5, IFI16, PCDH7, SFRP1, EMP3, DCBLD2, COPA, ARHGDIB, ARL4C, PLTP, CFH, THBS1, CALD1, GNG11, S100A9, DPYSL3, SNRPN, GREM1, DDX3X, ITGB6, COL5A1, CHP1, SPOCK1, RPS4Y1, IL13RA2, RAB6A, FST, SRGN, CXCL11, DUSP4, PRSS2, MX1, PLK2, LTBP1, PID1, TGFBR2, CALB1, PALLD, PDPN, TNC, CLIC4, TGFBR1, SERPINE2, SLC4A7, PRNP, CALU, MCL1, SSR3, GABPB1, VNN1, B4GALT1, DDX58, SORL1, TP63, NEFL, MAP1B	Up-regulated
122	WOO_LIVER_CANCER_RECURRENCE_up	0.000288268	0.00422266	0.4739	2.14984	0	104	LOX, COL6A3, POSTN, COL1A2, BHLHE41, SGCB, MGP, FGFR1, RGS10, DAB2, SEMA3C, COL11A1, ANOS1, IGFBP3, RGS1, TGFB2, PMP22, CRYAB, DPYSL3, COL1A1, PPT1, PKM, GEM, FLNA, ZEB2, PLAUR, GAS7, MAB21L2, TPBG, DUSP4, EFHC1, LAMP3, PFN2, TPM4, RGS2, TACSTD2, HK2, EVL, QSOX1, COL9A2, TEAD4, FGFR2, TMSB10	Up-regulated
123	JOHANSSON_BRAIN_CANCER_EARLY_VS_LATE_dn	0.000517197	0.00502717	0.568453	2.14442	1	42	DCN, C3, SPARC, CLSTN1, CLU, SPARCL1, IGFBP5, CRYAB, ITM2B, TEF, NDN, LRP1	Up-regulated
124	BACOLOD_RESISTANCE_TO_ALKYLATING_AGENTS_up	0.0004865	0.00502717	0.646209	2.14015	1	24	ID2, MYOF, SHOX2, MT2A, LMO2, PPP2R1B, HTRA1, MT1X, MDK	Up-regulated
125	BERENJENO_TRANSFORMED_BY_RHOA_dn	0.000424448	0.00464248	0.397462	2.13662	0	380	LOX, COPZ2, COL6A3, GNAI2, SFRP2, FN1, LAMA2, GBA, DCN, PDGFRA, LUM, LXN, POSTN, SNAI2, MMP14, CCDC80, CDK14, TCF4, ID2, CYP1B1, COL1A2, SGCB, MGP, OGN, FGFR1, MEG3, CSRP2, CLK1, JUND, C1R, PTPRM, LAPTM4A, PTPN13, FKBP7, AKAP12, CPQ, SPARCL1, TMEM45A, PLTP, NPC2, PMP22, THBS2, ARHGEF25, MEIS3, CNN3, SSPN, AEBP1, ATF5, MAOA, COL1A1, ITM2B, RAB11A, SIRT2, CTSA, MT1X, RARA, PPP3CA, KLF9, DKK3, COL6A…	Up-regulated
126	BERENJENO_TRANSFORMED_BY_RHOA_REVERSIBLY_dn	0.000249563	0.00422266	0.623591	2.13572	0	28	THY1, INHBA, ERRFI1, TAGLN, PHLDB2, SERPINE1, THBS1, IRGM, ALCAM, LY75-CD302, ACTA1	Up-regulated
127	NADERI_BREAST_CANCER_PROGNOSIS_dn	0.000238436	0.00422266	0.700115	2.12898	0	18	DCN, OMD, C1S, SHOX2, SPARCL1, ANXA5, TXNIP, SMOC2, MCEE	Up-regulated
129	DEMAGALHAES_AGING_up	0.000530223	0.00502717	0.537677	2.12775	1	53	APOD, C3, EFEMP1, LAPTM5, C1QB, CLU, NPC2, DCLK1, ANXA5, EFCAB14, C4A, RASA3, C1QC, FCGR2A, LYZ, SERPING1, GNS, SGK1, DERL1, GBP2, FCGR2B, CLIC4, TXNIP, SPP1, B2M	Up-regulated
132	MCDOWELL_ACUTE_LUNG_INJURY_up	0.000522057	0.00502717	0.55023	2.12226	1	46	LOX, COL3A1, KLHL2, AKAP12, DUSP1, STEAP4, SERPIND1, SLFN12, CDKN1A, TPM1, NFKBIA, OSMR, PLA2G7, FCGR2A, LTBP1, ZFP36, TNC, FOS, MAL, SPP1, CSTB, LITAF, MCL1, RBM3, PTX3, PTGES	Up-regulated
133	GILDEA_METASTASIS_up	0.000249563	0.00422266	0.619357	2.12122	0	28	FN1, IFI16, SPARC, TAGLN, CPQ, ARHGDIB, GLIPR1, IGFBP5, BST2, VAMP5, SRGN, DUSP4, MYL9, MPZL2, TACSTD2, TIMP3	Up-regulated
134	LU_AGING_BRAIN_up	0.000356633	0.0042502	0.412263	2.11864	0	252	CLIC2, IFI16, APOD, SFRP1, NEK7, RDX, MYOF, CYP1B1, EFEMP1, VCAN, PICALM, STOM, WNK1, CLK1, PIP4K2A, PLPP1, HIF1A, QKI, PTPN13, PDLIM5, ZCCHC24, MT2A, TP53BP2, CLEC2B, ITGB1, CFH, CALD1, GNG11, STK3, AFF1, PMP22, ABCG1, TMEM47, AGT, FERMT2, CRYAB, CREB3L2, TOR1AIP1, SSPN, ZBTB20, ITGAV, MAOA, DPYSL3, WWTR1, HTRA1, SDC2, ANXA5, S1PR1, VEGFB, RASSF2, NTRK2, ZEB2, PLXNC1, IQGAP1, SPON1, METTL7A, RGN…	Up-regulated
135	LIAN_LIPA_TARGETS_6M_up	0.000277778	0.00422266	0.489604	2.10818	0	79	MSR1, DNMT3A, IGSF6, SLC11A1, C1QB, C3AR1, RGS1, CD68, TLR7, S100A9, MS4A6A, CD84, CSTA, STEAP4, MS4A7, MYO5A, FCGR3A, DST, SLC6A2, SLFN12, CFP, C1QC, MMP8, CCR1, PLA2G7, FCGR2A	Up-regulated
136	WP_SENESCENCE_AND_AUTOPHAGY_IN_CANCER_up	0.000289184	0.00422266	0.465292	2.10768	0	103	FN1, COL10A1, IFI16, MMP14, INHBA, COL3A1, SPARC, RB1CC1, GABARAPL1, IGFBP3, ATG7, IGFBP5, SERPINE1, THBS1, SMAD4, GSK3B, SMAD3, IL6R, COL1A1, IFNG, UVRAG, IGFBP7, AMBRA1, IRF5, CDKN1A, SH3GLB1, IL6ST, PIK3C3, GABARAPL2, MAPK1, GABARAP, TNFSF15, IL1A, GSN, LAMP2, CCL3, MAP1LC3C, INS, SERPINB2, HRAS, ATG10, IL1B	Up-regulated
137	WP_PLATELETMEDIATED_INTERACTIONS_WITH_VASCULAR_AND_CIRCULATING_CELLS_up	0.000237812	0.00422266	0.702924	2.1073	0	17	TGFB3, VCAM1, TLR7, TGFB2, TLR4, SELPLG, ICAM1	Up-regulated
138	MIYAGAWA_TARGETS_OF_EWSR1_ETS_FUSIONS_dn	0.000345066	0.00422266	0.41687	2.10341	0	219	PRRX1, DMXL2, GLT8D2, NR2F2, LUM, SCG5, MMP14, GFPT2, CCDC80, COL3A1, SMAD7, SPARC, COL1A2, DCBLD2, VCAN, DAB2, ARHGAP1, MME, VGLL3, ZNF239, STXBP5, ITGA11, SEMA3C, NRP1, PLXNA1, COL11A1, SEC24D, IGFBP3, NREP, MEIS2, PKIA, NID2, PRDM1, F3, NR3C1, AK5, NRIP1, CDC42EP3, CEP135, COL5A1, SLC2A3, BNIP3, PPP2R3A, PLPP3, FGF7, CLCF1, SNX9, FST, SEMA5A, RFTN1, PLOD2, LRRC17, MAB21L2, PLPP4, OSMR, ADAM19,…	Up-regulated
139	WEST_ADRENOCORTICAL_TUMOR_MARKERS_dn	0.000240154	0.00422266	0.681027	2.10037	0	19	DCN, PDGFRA, MFAP5, C3, IGFBP5, NR4A2, SPON1	Up-regulated
140	MASRI_RESISTANCE_TO_TAMOXIFEN_AND_AROMATASE_INHIBITORS_dn	0.000238436	0.00422266	0.688646	2.0941	0	18	SNAI2, APOD, EFEMP1, TAGLN, FHOD3, CALD1, ITGB6, TNS3, NT5E	Up-regulated
141	AZARE_STAT3_TARGETS_up	0.000972999	0.00753024	0.630739	2.08892	3	24	FN1, PCDH7, COPA, THBS1, S100A9, DDX3X, ITGB6, CHP1, TNC, CLIC4, MCL1, B4GALT1, TP63, TWF1	Up-regulated
143	GNATENKO_PLATELET_SIGNATURE_up	0.000513215	0.00502717	0.562974	2.08751	1	39	SPARC, GPX1, RGS10, CLU, ITM2B, RNF24, YWHAH, UBC, PKM, FLNA, FTH1, MYL6, CD99, ACTB, HLA-E, B2M, FTH1P5	Up-regulated
144	MARKEY_RB1_ACUTE_LOF_dn	0.000340832	0.00422266	0.411321	2.08656	0	223	PRRX1, GBA, IFI16, APOD, EVI2A, BNIP3L, SGCB, CPXM2, OGN, C1QB, PTPRC, STOM, FKBP7, TMEM45A, IGFBP3, C3AR1, IGFBP5, ADAR, TRIM5, SLFN12L, ABCG1, CPXM1, LMO2, IRGM, CASP4, CTSH, PCSK5, PLIN2, SELPLG, DDX3Y, MT1X, GMFG, LCP1, VAV1, PROCR, RAB8B, SKAP2, IQGAP1, TBC1D22A, HCK, BCL2A1, CFP, PTPN6, C1QC, CCR1, SRGN, IL7R, ITGAX, NT5E, PLA2G7, IFIH1, NCF1, ADGRE1, UBE2L6, LYZ, PLEKHO1, HCLS1, SERPING1, …	Up-regulated
145	WEINMANN_ADAPTATION_TO_HYPOXIA_dn	0.000514403	0.00502717	0.565099	2.08273	1	38	PLA2G4A, COL3A1, IGFBP3, RGCC, VEGFC, IGFBP7, PLAUR, TPBG, TPM1, NT5E, CD55, CADM1, SOD2, UGCG, IL1A, TFPI2, NRCAM, KCNK1, MARCKS	Up-regulated
146	TONKS_TARGETS_OF_RUNX1_RUNX1T1_FUSION_HSC_up	0.000328623	0.00422266	0.423153	2.08086	0	179	MFAP2, IFI16, RUNX1, ACTA2, COL3A1, EVI2A, BNIP3L, SPARC, VCAN, DNAJB5, DAB2, MEG3, LPAR6, PNRC1, PDLIM5, RGS1, FSTL1, CLEC2B, NLRP1, TRIM5, TUSC3, ZBTB20, NID1, CD200, CDC42EP3, RHOC, EMP1, SOCS2, ECM1, PROCR, S1PR1, SMARCA1, BBIP1, SLC2A3, PDCD4, ARG2, AHR, RNF17, HOMER3, HOXA5, TAAR2, LILRA2, WSB1, RSRP1, ALDH1A1, CALCRL, BAMBI, TNFSF4, TCF7L2, IL1RL1, ZFYVE16, TGFBR2, HOXB6, RGS2, PALLD, GBP2…	Up-regulated
147	LEE_NEURAL_CREST_STEM_CELL_up	0.000312695	0.00422266	0.434557	2.07807	0	146	EDNRA, BGN, NR2F2, DCN, PDGFRA, LUM, POSTN, SNAI2, IFI16, LGALS1, NRP2, COL3A1, COL1A2, FAP, LAMB1, LPAR6, SEMA3C, ZCCHC24, NEFM, IGFBP5, ST18, COL14A1, PMP22, GYPC, DPYD, ALCAM, NRIP1, SCRG1, S100A11, IGFBP7, ANXA1, ZEB2, LIN28A, CNR1, CELF3	Up-regulated
149	MAHADEVAN_IMATINIB_RESISTANCE_dn	0.000717532	0.00626756	0.659849	2.07553	2	20	ADGRL2, VCAM1, CXCR4, ABCG1, PTGIS, ANO1, FGL2, SRGN, CXCL12, KIT, MEOX2, CST1, HAND1	Up-regulated
150	REACTOME_IKK_COMPLEX_RECRUITMENT_MEDIATED_BY_RIP1_up	0.000482975	0.00502717	0.642122	2.07478	1	22	IKBKG, LY96, IKBKB, TLR4, UBC, UBE2D3, TRAF6, UBA52, CHUK, RIPK1	Up-regulated
151	IKEDA_MIR133_TARGETS_up	0.000517197	0.00502717	0.548999	2.07103	1	42	SLC23A2, ANKRD12, HIF1A, EBF2, USP32, FMNL2, HS2ST1, SGPP1, DDX3X, CYLD, GNAI3, CDC42, ACTR3, PPP2CA, RAPH1, RBPJ, SNX1, MYH9	Up-regulated
152	WINTER_HYPOXIA_dn	0.000517866	0.00502717	0.542381	2.06874	1	44	FBLN5, EVI2A, CD28, PTPRC, TLR7, ARHGEF6, ATM, GYPC, LMO2, SYNE1, CD48	Up-regulated
153	LIM_MAMMARY_LUMINAL_MATURE_dn	0.000282167	0.00422266	0.46503	2.06809	0	93	SNAI2, TSPAN2, SFRP1, DAB2, COL6A1, TSHZ2, SPARCL1, IGFBP3, NREP, FSTL1, MEIS2, LMO4, ZNF521, CALD1, FBXO32, GYPC, TMEM47, CRYAB, AEBP1, TIAM2, HTRA1, AQP9, HEY2, COL6A2, NTRK2, RASA3, STAC2, CYGB, CAMK2D, PRICKLE1	Up-regulated
154	LIEN_BREAST_CARCINOMA_METAPLASTIC_up	0.000251572	0.00422266	0.580361	2.06742	0	33	PRRX1, SFRP2, PDGFRA, LUM, POSTN, SPARC, KCNE4, THBS1, THBS2, HTRA3, MXRA8, EDIL3, TPM4	Up-regulated
155	MISHRA_CARCINOMA_ASSOCIATED_FIBROBLAST_up	0.000972999	0.00753024	0.624235	2.06738	3	24	CTHRC1, THY1, EGR1, COL6A1, CTSK, MMP9, TMEM156, RAB3B, GEM, COL6A2, BEX5, TNC, FOS, PDGFRB	Up-regulated
156	KANG_AR_TARGETS_dn	0.000476872	0.00502717	0.679446	2.06613	1	18	COL1A2, CTSK, ITGB1, COL1A1, ANXA5, VEGFB, MMP8, SLC20A2, SLC20A1, SPP1	Up-regulated
157	BEGUM_TARGETS_OF_PAX3_FOXO1_FUSION_up	0.000531067	0.00502717	0.508486	2.06464	1	59	PCDH7, OMD, SLIT3, PLSCR4, SEMA3C, LMO4, GNG11, DPYD, ADAMTS1, MDFIC, CNR1, PLXNC1, STX11, KITLG, SH3GLB1, CALCRL, TPBG, NT5E, CITED1, LTBP1, SGK1, AUTS2, KAT6B, PTPRG	Up-regulated
158	LANDIS_BREAST_CANCER_PROGRESSION_dn	0.000274048	0.00422266	0.492157	2.06433	0	70	COL6A3, LUM, CCDC80, COL3A1, ZEB1, DPT, LAMB1, QKI, NRP1, FSTL1, ANGPTL2, COL1A1, HTRA1, HSPB8, MAP4, COL5A1, PPP2R5A, CXCL12, PENK, GJA1, DERL1, GHR, IGFBP6, FEZ2, SULT1A1, ALAD, CD34, COL4A1	Up-regulated
159	SANA_TNF_SIGNALING_up	0.000275482	0.00422266	0.474801	2.06252	0	82	CTHRC1, PDGFRL, INHBA, C1S, VCAM1, SERPINE1, SSPN, SMAD3, ITGAV, FTH1, SAMHD1, BST2, CXCL11, IL7R, NFKBIA, IFIT1, IFIH1, MX1, TNFAIP3, ICAM1, SAMD9L, SOD2, HLA-E, CMPK2, CX3CL1, ATP13A3	Up-regulated
161	MANALO_HYPOXIA_up	0.000337154	0.00422266	0.412451	2.05968	0	200	LOX, BGN, APOD, INHBA, BNIP3L, COL1A2, MEF2A, SEC24A, CHST15, HIVEP2, SIK1, PLCG2, LAMB1, SHOX2, TMEM45A, IGFBP3, ARL4C, CXCR4, SERPINE1, MAST4, FNDC3B, PTPRR, PTGIS, GYPC, CREB3L2, CD200, LIMS1, VEGFC, HTRA1, MMP2, DKK3, PGM3, RASSF2, COL5A1, SPOCK1, SLC2A3, TRIO, BNIP3, PAM, PTGS1, CUBN, NFATC4, PLOD2, LEPR, TNFRSF10B, VLDLR, KLF11, TPM1, CELF2, ZHX2, CHSY1, TNFAIP3, PLEKHO1, ATXN1, SPSB1, FILI…	Up-regulated
162	COATES_MACROPHAGE_M1_VS_M2_up	0.000277778	0.00422266	0.471375	2.05669	0	84	PLXDC2, OGFRL1, SLCO2B1, ARSB, MSR1, GDA, CXCR4, SFI1, CFH, HLA-DQA1, CD59, RASAL2, MAF, DST, BLOC1S6, ABCA9, RFX3, P2RY13, DYNLT1, CADM1, FILIP1L, GJA1, HAUS2, PIK3AP1, TXNIP, CBX6, CNRIP1, ALAD, NAT8L, AIF1, NRCAM, TTC3	Up-regulated
164	BURTON_ADIPOGENESIS_PEAK_AT_0HR_up	0.000531773	0.00502717	0.504448	2.05543	1	60	SFRP2, TGFB3, PDGFRA, ACTA2, MGP, OGN, DAB2, CTSK, COL11A1, NREP, THBS2, F3, CRYAB, PLIN2, VEGFC, APBB1IP, MAP4, FLOT1, TPM1, MYL9, COL8A1, PDGFRB, GAS1, SPP1, RUNX1T1, TIMP3	Up-regulated
165	REACTOME_CELL_EXTRACELLULAR_MATRIX_INTERACTIONS_up	0.000715308	0.00626034	0.675872	2.05526	2	18	ITGB1, ARHGEF6, FERMT2, LIMS1, FLNA, ACTB, ACTN1, FLNC, ACTG1, ILK	Up-regulated
166	BERENJENO_ROCK_SIGNALING_NOT_VIA_RHOA_dn	0.000523972	0.00502717	0.527192	2.05154	1	48	NR2F2, ACTA2, SPARC, EGR1, QKI, DOCK5, NRP1, VCAM1, F3, FERMT2, SF3B1, XBP1, IER2, WSB1, SH3GLB1, PPP1CB, TPM1, LPP, UGCG, MYH9	Up-regulated
168	BRUECKNER_TARGETS_OF_MIRLET7A3_dn	0.000273224	0.00422266	0.483579	2.04783	0	73	FN1, SFRP1, NRP2, SPARC, EFEMP1, COL11A1, MT2A, AKR1B1, TGFB2, CALD1, TRNP1, DPYSL3, MT1X, COL5A1, SPOCK1, LASP1, FLNB, PMEPA1, SULF2, BCL2A1, ACTR3, RNF149, TRAM1, PLK2	Up-regulated
169	LI_WILMS_TUMOR_VS_FETAL_KIDNEY_2_dn	0.000523286	0.00502717	0.528678	2.0474	1	47	INHBA, SDC1, DAB2, SEMA3C, IGFBP5, THBS1, GNG11, PMP22, RUNX3, AGT, ALCAM, ITGAV, COL5A1, TGFBR2, CDH6, LHX1, CX3CL1, SPP1, IGFBP6, TIMP3, COL4A1, APOE	Up-regulated
170	BIOCARTA_TOB1_PATHWAY_up	0.000480307	0.00502717	0.662865	2.04436	1	19	TGFB3, CD28, TGFB2, SMAD4, SMAD3, IFNG, TGFBR2, TGFBR1	Up-regulated
171	POMEROY_MEDULLOBLASTOMA_DESMOPLASIC_VS_CLASSIC_dn	0.000530926	0.00502717	0.499096	2.04327	1	61	SCG5, APOD, TCF4, COL3A1, COL1A2, VCAN, MGP, C1S, IGFBP5, CXCR4, LMO4, CFH, NID1, COL1A1, CNR1, LTBP2, NFATC4, INSM1, FIG4, SHROOM2	Up-regulated
172	KEGG_TGF_BETA_SIGNALING_PATHWAY_up	0.000277932	0.00422266	0.466185	2.0432	0	86	TGFB3, DCN, BMPR1B, INHBA, ID2, SMAD7, NOG, SMAD2, ACVR1, RPS6KB2, CREBBP, TGFB2, THBS1, SMAD4, THBS2, SMAD3, PPP2R1B, IFNG, BMP8B, ROCK2, FST, PPP2CA, LTBP1, MAPK1, BMPR2, ZFYVE16, TGFBR2, SKP1, INHBC	Up-regulated
174	DANG_REGULATED_BY_MYC_dn	0.000351247	0.00424567	0.399886	2.0402	0	238	LOX, COL6A3, FN1, PDGFRA, LXN, POSTN, PLS3, THY1, FBLN5, INHBA, ID2, COL3A1, SPARC, COL1A2, MGP, SLC11A1, ERRFI1, HIVEP2, PRLR, AKAP12, VCAM1, NREP, GPM6B, FSTL1, GLT8D1, ITGB1, KLF7, SERPINE1, DUSP1, THBS1, CALD1, NPC2, PMP22, GDI1, F3, CRYAB, COL1A1, LIMS1, ITM2B, CD48, SLC2A5, RARA, FTL, FTH1, COL5A1, CHP1, PLAUR, PAM, ARHGEF7, ZFP36L1, SDCBP, DDX5, CDKN1A, VLDLR, PIM1, TPM1, IFIT1, RRM2B, AQP…	Up-regulated
177	GENTILE_UV_RESPONSE_CLUSTER_D6_up	0.000505945	0.00502717	0.566221	2.03477	1	34	PRRX1, PDGFRA, CHTOP, BCAR3, MFAP1, QKI, ARL4C, MEIS2, SMAD3, IFNGR2, LPAR1, NFYA, CXCL12, NFYB, UGCG	Up-regulated
178	SASAI_RESISTANCE_TO_NEOPLASTIC_TRANSFROMATION_up	0.000523286	0.00502717	0.525259	2.03416	1	47	BGN, TGFB3, FBLN5, FBN1, RGS10, TAGLN, FSTL1, ADAMTS1, COL1A1, SDC2, LTBP2, PLOD2, CSRP1, VLDLR, IL6ST, IL1RL1, CXCL12, GBP2, JUNB, PDGFRB, QSOX1, APP	Up-regulated
179	MORI_IMMATURE_B_LYMPHOCYTE_up	0.000523972	0.00502717	0.522308	2.03253	1	48	CD74, RHOQ, PTPRC, PIP4K2A, SMAP2, ATP6V0B, LIMS1, HLA-DMB, IGKV1D-12, TRAF3, SAMHD1, HCK, GPR65, PTPN6, ERO1B, IL10RA, GNS, CD83	Up-regulated
180	GAUSSMANN_MLL_AF4_FUSION_TARGETS_F_up	0.000327225	0.00422266	0.412707	2.02929	0	178	LOX, PLXDC2, TGFB3, MFAP2, MFAP5, ARSB, COL3A1, ADAMTS4, OGN, TMEM154, DAB2, MEG3, PLCG2, MME, COL6A1, PNRC1, SCARA3, ARHGAP28, PSTPIP2, RGS4, CTSH, SLC16A4, S100A16, ADAMTSL4, ECM1, DKK3, COL6A2, ATP8B4, ZFAND5, LTBP2, AHR, DYSF, CDA, TLE2, ZFP36L1, PREX2, RSRP1, FST, ZNF185, OSMR, LY6H, FMOD, LDB3, NT5E, IFIH1, CLMN, PRICKLE1, SYNPO, AUTS2, OSR1	Up-regulated
181	DURAND_STROMA_S_up	0.000378501	0.0043713	0.388685	2.02729	0	289	SFRP2, MEDAG, LOXL1, PDGFRA, POSTN, SNAI2, SRPX2, CCDC80, DCLK2, COL3A1, ZC2HC1A, COL1A2, ADGRL2, RB1CC1, PLXND1, B3GALNT1, PLPP1, MID2, SERPINF1, CD248, ARHGAP28, FAM20A, NID2, RGS4, ARHGEF6, ZDHHC15, PMP22, PRKD1, TMEM47, GRIA3, CTSH, BACH2, HTRA3, DPYSL3, COL1A1, PDE4D, PYGO1, PLEKHA2, MMP2, S100A16, MAF, TVP23A, PDE1A, GNAO1, COL6A2, SVEP1, EN1, HSPB8, S1PR1, MAP9, RBPMS2, RASSF2, FAT4, LTBP2…	Up-regulated
182	REACTOME_CHONDROITIN_SULFATE_DERMATAN_SULFATE_METABOLISM_up	0.000525486	0.00502717	0.517413	2.0255	1	50	BGN, DCN, ARSB, CHST11, DSE, SDC1, VCAN, CHST15, SDC2, DSEL, IDS, CHST9, B4GALT7, HSPG2, CHSY1, CSGALNACT2, CHST14, BCAN	Up-regulated
184	PANGAS_TUMOR_SUPPRESSION_BY_SMAD1_AND_SMAD5_up	0.000303214	0.00422266	0.43283	2.01964	0	125	GXYLT2, EMP3, FBLN5, CDK14, TCF4, NAV1, LAPTM5, NHSL2, APBB2, ANGPTL1, FSTL1, PLTP, TRIM5, PKIA, MNDA, ARHGEF25, CRYAB, SNX24, NID1, GMFG, MMP2, S100A16, LCP1, TMEM178B, LASP1, SIPA1L1, ZFP36L1, PRUNE2, EMILIN1, RFTN1, KMT2C, CELF2, MVP, NFATC1, EYA4, ADGRE1, LYZ, RBMS3, BAG2, CLEC7A, GNA14, TNFAIP8, RPL22L1, GSN	Up-regulated
185	SHARMA_PILOCYTIC_ASTROCYTOMA_LOCATION_up	0.000494315	0.00502717	0.593487	2.01879	1	27	LUM, LY96, MSR1, ZFHX4, CMTR2, ARL1, TTC9, TIFA	Up-regulated
186	CUI_TCF21_TARGETS_up	0.000510725	0.00502717	0.554625	2.01607	1	36	DCN, LUM, COL3A1, FAP, VCAN, CYP7B1, MEG3, COL6A1, SERPINF1, CFH, COL6A2, MDK, COL8A2, PENK, LHFPL2, CADM1, CDH6	Up-regulated
187	HOLLERN_SOLID_NODULAR_BREAST_TUMOR_dn	0.000249938	0.00422266	0.579295	2.01553	0	30	SPARC, VASH2, GLI3, LRRC8C, NID1, PANX1, AQP1, TRIM35, RBMS3, ICAM1, GJA1, PDPN, TMEM159, HAS2	Up-regulated
189	KINSEY_TARGETS_OF_EWSR1_FLII_FUSION_dn	0.000390168	0.00442618	0.382333	2.01357	0	317	LOX, FRMD6, FN1, POSTN, EMCN, CCDC80, LMO3, COL3A1, SPARC, MB21D2, FBN1, MGP, DAB2, GULP1, TAGLN, LPAR6, ANKRD6, SPARCL1, ZCCHC24, FSTL1, FMNL2, ANGPTL2, IGFBP5, TRO, CLEC2B, CDON, PXDC1, NLRP1, KLF7, TGFB2, NPC2, FNDC3B, AFF1, LMO2, CD59, DCLK1, COL1A1, GEM, DSEL, IGFBP7, CRYBG3, TNRC6B, COL5A1, RBM41, PDCD4, FLNB, TBC1D22A, MXRA8, DST, UBXN4, SULF2, CCS, BCL9L, ZYX, PSAP, TENM2, ALDH1A1, LRRC17…	Up-regulated
190	PID_TOLL_ENDOGENOUS_PATHWAY_up	0.00121625	0.00867836	0.607711	2.01265	4	24	BGN, IKBKG, LY96, VCAN, IKBKB, S100A9, TLR4	Up-regulated
191	FRIDMAN_SENESCENCE_up	0.000273373	0.00422266	0.472962	2.00994	0	74	RAB31, FN1, IFI16, CYP1B1, SPARC, COL1A2, IGFBP3, IGFBP5, SERPINE1, THBS1, ESM1, TSPYL5, F3, CRYAB, IFNG, NDN, S100A11, CITED2, IGFBP7, IRF5, CDKN1A, TNFAIP3, FILIP1L, HSPA2, VIM, GSN, CCND1, PEA15, IGFBP6	Up-regulated
192	MARKEY_RB1_CHRONIC_LOF_dn	0.000294724	0.00422266	0.433367	2.00951	0	118	DCN, IFI16, MSR1, CD53, C1QB, PTPRC, GABARAPL1, IGFBP3, C3AR1, CFH, TGFB2, GNG11, SLFN12L, LMO2, ATP6V0B, MS4A6A, CD59, PLIN2, HTRA1, VAV1, SPI1, SKAP2, KDM5B, IRF5, CFP, C1QC, SRGN, ACTA1, PLA2G7, RNF149, CADM1, CCL3, TIMP3, TRPV2, ZDHHC14, PRRC1, IVL, APOE, EDN1, ENAH, PLSCR2, TYROBP, CRCT1, LCP2, PRL, CP, SLCO3A1	Up-regulated
193	BIOCARTA_LAIR_PATHWAY_up	0.000713436	0.00625618	0.670022	2.00866	2	17	C3, VCAM1, ITGB1, SELPLG, C7, ICAM1, C6, IL1A	Up-regulated
195	YORDY_RECIPROCAL_REGULATION_BY_ETS1_AND_SP100_up	0.00120744	0.00864302	0.620925	2.00629	4	22	SCARA3, ATF5, PPP2R1B, ADGRF5, RARA, RASSF2, HMGN4, VPS26B, SS18L2, TACSTD2, CDK2, IGFBP6	Up-regulated
196	HUANG_DASATINIB_SENSITIVITY_up	0.000277008	0.00422266	0.470168	2.00617	0	76	SNAI2, IFI16, PCDH7, LAYN, GBP3, DCBLD2, FSTL1, CALD1, ITGA5, DPYD, F3, CDC42EP3, COL5A1, ANXA1, SOCS5, ZYX, ARHGAP29, OSMR, ELL2, TGFBR2, SAMD9L, DUSP10, P3H2, SH3KBP1, KCTD12, MAP7D1, AGPS, PRNP	Up-regulated
197	COWLING_MYCN_TARGETS_up	0.000517197	0.00502717	0.531312	2.00431	1	42	COPZ2, FBLN5, CPXM2, TAGLN, SHOX2, COL11A1, IGFBP5, GRIA3, CRYAB, ALPK2, GREM1, DSEL, TK2, MYL9, PRR5L, ANO4, SAMD9L, PVALB, SPP1	Up-regulated
198	PETROVA_PROX1_TARGETS_dn	0.000529521	0.00502717	0.501737	2.0021	1	55	MMP14, EMP3, PLA2G4A, TFEC, FAP, VCAN, NRP1, ARHGDIB, SERPINE1, RGS4, ITGA5, CD59, PRKACB, PROCR, LTBP2, TRAM2, SRGN	Up-regulated
200	LENAOUR_DENDRITIC_CELL_MATURATION_dn	0.000304971	0.00422266	0.427729	1.99796	0	126	EMP3, EVI2A, C3, SLC11A1, CTSK, SERPINF1, ARHGDIB, BCAT1, C3AR1, CD163, CLEC2B, MMP9, S100A12, S100A9, IL6R, RTN1, EMP1, HTRA1, SDC2, IDS, PLAUR, BST1, C5AR1, CYTIP, FGL2, CYBB, NFKBIA, OLR1, NCF1, FCGR2A, LYZ, SNX17, TAX1BP3, LHFPL2, SOD2, LST1, ITPR1	Up-regulated
201	PID_AP1_PATHWAY_up	0.000271444	0.00422266	0.476859	1.99756	0	69	TIMP1, COL1A2, EGR1, JUND, HIF1A, MT2A, MMP9, DUSP1, NR3C1, AGT, IFNG, MAF, ATF2, FABP4, ACTA1, IL5, NFATC1, TCF7L2, PENK, GJA1, FOSL2, JUNB, FOS, CCND1	Up-regulated
202	JOHNSTONE_PARVB_TARGETS_1_dn	0.000531067	0.00502717	0.491823	1.99698	1	59	COL6A3, BICC1, ETV1, DSE, ZC2HC1A, QKI, GPX8, SEC24D, ATP10D, PPP3CA, FAT1, TMEM106B, SHC3, MCTP1, RBPJ, C5orf24, RBMS1, APCDD1L, TNC, NPIPB4, DNAJB14, DMXL1, RELL1, CTSB	Up-regulated
203	CLASPER_LYMPHATIC_VESSELS_DURING_METASTASIS_up	0.000720461	0.00626871	0.647461	1.99685	2	19	TGFB3, ANGPT2, TGFB2, THBS1, CD200, ENG, LEPR, PIM1, AJUBA, TNC	Up-regulated
204	CHIARADONNA_NEOPLASTIC_TRANSFORMATION_CDC25_up	0.000298151	0.00422266	0.429058	1.9954	0	121	LOXL1, LXN, IFI16, THY1, CYP1B1, C3, VCAN, MGP, ERRFI1, PHLDB2, VCAM1, THBS1, MNDA, THBS2, CASP4, NID1, RAB11A, APBB1IP, UTP14A, LTBP2, PLPP3, FGF7, EIF2AK4, LPAR1, OSMR, IVNS1ABP, ADAM19, PFN2, IL1RL1, NPNT, SYNPO, GREM2, PDPN, EMB, TNC, CDO1, NGEF, HAS2, CTSB, EVL, LAMP2, ATP13A3, FGFR2, SMOC2, SLC38A2, ANP32E, ENAH, RBM3, PTX3, PRL, IL1R1, BACH1, PDK4	Up-regulated
206	HESS_TARGETS_OF_HOXA9_AND_MEIS1_dn	0.000276778	0.00422266	0.459824	1.99197	0	81	MSR1, ID2, VCAN, SLC11A1, DAB2, EGR1, C3AR1, MMP9, DUSP1, SLFN12L, MS4A6A, AQP9, ANXA1, ARG2, SAMHD1, FPR2, ZFP36L1, HCK, PSAP, MMP8, PLEK, CYBB, LYZ, CAMK2D, ZFP36, MYADM, CCR5, CLEC7A, FOS, LIPA	Up-regulated
209	WP_TGFB_SIGNALING_IN_THYROID_CELLS_FOR_EPITHELIALMESENCHYMAL_TRANSITION_up	0.000953743	0.00744551	0.654595	1.99056	3	18	FN1, SNAI2, SMAD2, SMAD4, SMAD3, MAPK1, CDH6, RUNX2, TNC, VIM	Up-regulated
211	SCHOEN_NFKB_SIGNALING_up	0.000251004	0.00422266	0.561756	1.98939	0	32	FN1, SULF1, C3, IGFBP3, IGFBP5, MMP9, THBS1, PMP22, NFKBIA, TNFRSF9, IL1A, IL1B, EDN1, PTX3	Up-regulated
212	VALK_AML_CLUSTER_6_up	0.000505945	0.00502717	0.553184	1.98792	1	34	CD74, PIEZO2, HLA-DPA1, RGS10, HLA-DRA, CFH, FTO, DPYSL3, BST2, LTBP1, XPA, PECAM1, HLA-DRB1, SLC27A6, FOXC1	Up-regulated
213	WILENSKY_RESPONSE_TO_DARAPLADIB_up	0.000741473	0.00642658	0.582601	1.98175	2	27	EVI2A, CD68, UCP2, BIN2, CD48, LAIR1, ARRB2, PLAUR, CCR1, CYBB, PLA2G7, NCF1, SLC27A4, IL1A, NPL	Up-regulated
215	CHEN_LVAD_SUPPORT_OF_FAILING_HEART_up	0.000285144	0.00422266	0.440897	1.98115	0	98	POSTN, SNAI2, DNAJB5, PLPP1, LAMB1, CLU, MT2A, CD163, SERPINE1, CALD1, RGCC, FNDC3B, ZBTB20, PLIN2, NID1, MT1X, KLF9, ZFAND5, ZNF189, METTL7A, CDKN1A, ACTA1, ZBTB16, NFKBIA, ZFP36, FOSL2, FLNC, TXNIP, VCL, TIMP3, MAPRE2, PIK3R1, DDAH1, HYAL2, SLC38A2, MCL1, KCNK1, ANKRD2, NES, PDK4, DIXDC1, IRS2	Up-regulated
216	KRASNOSELSKAYA_ILF3_TARGETS_up	0.000510595	0.00502717	0.54018	1.97859	1	37	IFI16, OMD, FAP, CLEC2B, CFH, RGS4, EMP1, HBE1, BLZF1, IL6ST, IFIT1, NT5E, MX1, HLA-E	Up-regulated
217	WP_SIGNAL_TRANSDUCTION_OF_S1P_RECEPTOR_up	0.00121625	0.00867836	0.596959	1.97704	4	24	GNAI2, S1PR2, S1PR1, MAPK6, GNAI3, ASAH1, MAPK1, S1PR5, RACGAP1, AKT2, PLCB3	Up-regulated
218	CHEN_ETV5_TARGETS_SERTOLI_up	0.00123671	0.00875462	0.588192	1.97527	4	26	ARSB, CD53, C1QB, ANGPTL2, MS4A6A, PLEK, FCGR2A, CXCL12, CLEC7A, FCGR2B, KIDINS220	Up-regulated
219	HOSHIDA_LIVER_CANCER_LATE_RECURRENCE_up	0.000531773	0.00502717	0.484765	1.97523	1	60	LUM, SNAI2, ITGBL1, MMP14, TCF4, CD74, LAMB1, CTSK, AKAP13, RGCC, CPXM1, GTF2B, P3H4, CD48, POU2F2, ANXA1, RASGRP1, FGL2, DSC3, PPP1CB	Up-regulated
221	VECCHI_GASTRIC_CANCER_EARLY_dn	0.00040783	0.00453829	0.370206	1.97228	0	350	LAMA2, CYBRD1, PCDH7, SFRP1, BMPR1B, MFAP5, PRKD3, OMD, CYP1B1, JAM2, EFEMP1, RNF180, DPT, CLU, GSPT2, GABARAPL1, GPM6B, ANGPTL1, ADGRG2, ABCA8, CFH, SCUBE2, RGS4, IGKV1D-13, RCAN2, SLAMF7, TMEM47, NR3C1, CPE, NME5, SNX24, IL6R, MAOA, PRKACB, SNRPN, C7, MT1X, MAF, THSD4, KLF9, GNAO1, CITED2, SVEP1, CHRDL1, PLCXD3, HSPB8, KCNE2, LYVE1, TNFRSF17, MAP9, SMARCA1, RBPMS2, IGKV1D-39, PGM5-AS1, BNIP3, P…	Up-regulated
224	ROZANOV_MMP14_TARGETS_up	0.000356506	0.0042502	0.382757	1.96715	0	253	FRMD6, FN1, SRPX2, MMP14, PDGFRL, TDO2, GBP3, EFEMP2, EFEMP1, GJB2, PLXND1, CHST15, ERRFI1, B3GALNT1, COL6A1, HIF1A, TAGLN, LAMB1, FKBP7, TMEM45A, RWDD2B, LHPP, GLIPR1, ANGPTL2, RGS4, CALD1, BACE1, STK3, SLAMF7, NR3C1, CPE, AK5, HTRA3, ALPK2, TRPV4, HLA-DMB, SLC16A4, GMFG, COL6A2, HBE1, IGFBP7, SMARCA1, RBPMS2, COL5A1, CDC42, MDK, PTGS1, SULF2, FKBP1A, HLA-DPB1, FST, PLOD2, LRRC17, CGNL1, TPM1, S…	Up-regulated
228	ZHAN_MULTIPLE_MYELOMA_LB_up	0.000783085	0.00651506	0.50799	1.95934	2	46	COPZ2, SRGAP2, CYBRD1, PLXNA1, ITGB1, ADAM22, SMAP2, MAST4, PLEKHA7, USP53, RASGRP1, FLNB, PECAM1, IZUMO4, SCUBE1, ARID5B, RELL1, COL9A2, KCNJ11, MBD2, PHACTR3, NAMPT, EDN1	Up-regulated
229	SENESE_HDAC1_AND_HDAC2_TARGETS_dn	0.000342466	0.00422266	0.388496	1.95648	0	216	LOX, GLT8D2, LOXL1, LUM, GXYLT2, ITGBL1, PLS3, PDGFRL, CCDC80, MFAP5, TCF4, COL3A1, SDC1, FGFR1, NOG, TAGLN, BNC2, CLU, SCARA3, GPX8, TMEM45A, FSTL1, IGFBP5, ZSCAN31, DUSP1, TGFB2, CALD1, SERTAD4-AS1, CRYAB, COL1A1, ALPK2, CDC42EP3, SDC2, MAF, IGFBP7, PRRT3, TNS3, TK2, PCLO, NEXN, TCP11L1, CALB2, KRT80, WFDC21P, MEIS1, TENM2, CADM3, GLI2, TPM1, CELF2, LOXL4, MYL9, AQP1, EDIL3, RBMS3, DACT1, LTBP3…	Up-regulated
230	DAVIES_MULTIPLE_MYELOMA_VS_MGUS_dn	0.00147384	0.0100829	0.585645	1.95366	5	25	LY96, CDK14, ARHGAP1, NPC2, LASP1, ACTN1, MYH9, VCL, LITAF, MARCKS	Up-regulated
231	OISHI_CHOLANGIOMA_STEM_CELL_LIKE_dn	0.00036036	0.00428322	0.376876	1.94854	0	262	RAB31, BGN, MFAP2, MMP14, NRP2, EMP3, TIMP1, QPCT, ACTA2, COL3A1, CYP1B1, BNIP3L, EFEMP2, ABI3BP, EFEMP1, FAP, FBN1, IRAK3, CLIC3, KCNE4, TAGLN, BNC2, VCAM1, SEC24D, MT2A, ANGPTL2, KCNN4, CLEC2B, FMO2, PLTP, MSC, PTPRR, PMP22, PTGIS, THBS2, TMEM47, AEBP1, VEGFC, EMP1, MT1X, SLC2A5, ITGB6, GEM, AQP9, LRP1, ECM1, DKK3, COL6A2, CITED2, PROCR, CR1, SGCA, IFNGR2, COL5A1, BST1, TRAM2, AHR, UNC5C, STX11…	Up-regulated
232	GERHOLD_ADIPOGENESIS_dn	0.000531067	0.00502717	0.479687	1.9477	1	59	FN1, MMP14, SDC1, VCAN, ITGB1, AKR1B1, UCP2, THBS1, THBS2, CRYAB, ANXA5, ECM1, GAS7, FGF7, SAMHD1, CXCL12, SAE1, BID, PDGFRB, GAS1, CCND1, SOX4, UBTF, CDK4, CD81, IL1R1, ANXA3, ANXA2	Up-regulated
234	RHEIN_ALL_GLUCOCORTICOID_THERAPY_up	0.000273224	0.00422266	0.45823	1.94049	0	73	LY96, SWAP70, PTPRC, GPR183, KLHL2, GABARAPL1, GLIPR1, MNDA, NR4A2, CSTA, KLF9, ZNF331, IDS, ZNF165, CYTIP, GPR65, DUSP4, P2RY10, ASAH1, LYZ, CD55, RGS2, ABCA1, FOSL2	Up-regulated
235	DAVICIONI_TARGETS_OF_PAX_FOXO1_FUSIONS_up	0.000351865	0.00424567	0.378494	1.93908	0	245	PRRX1, NR2F2, SNAI2, CYBRD1, PCDH7, NRP2, SULF1, TIMP1, INHBA, ID2, MYOF, CHST11, CD58, PCCA, MEG3, MME, AKAP12, GPM6B, ARL4C, CXCR4, COL14A1, DUSP1, THBS1, TMEM47, NR3C1, MSX2, ADAMTS1, PCSK5, NID1, ITM2B, VEGFC, CTSA, EMP1, SDC2, SOCS2, ECM1, COL6A2, WBP1L, MAGEL2, COL5A1, TNS3, TRAM2, PLXNC1, PTGS1, FST, LRRC17, CSRP1, TPBG, RAB32, ARHGAP29, NTAN1, ADAM19, VSTM4, CLMN, LTBP1, TCF7L2, TNFAIP3, …	Up-regulated
236	RUTELLA_RESPONSE_TO_HGF_VS_CSF2RB_AND_IL4_up	0.000431034	0.00464248	0.358703	1.93756	0	394	DMXL2, GBA, LXN, VSIG4, SLC12A8, RDX, MYOF, CYP1B1, C3, SPARC, BHLHE41, EMC7, MPRIP, IRAK3, SLC16A6, CHST15, SP110, DAB2, RHOQ, EGR1, STOM, C1S, SLC43A3, CTSK, NRP1, ANOS1, BCAT1, MT2A, C3AR1, CD163, AKR1B1, MMP9, PLTP, SERPINE1, EIF2B3, RGCC, SLAMF7, S100A12, HLA-DQA1, S100A9, LMO2, RGL1, NR4A2, SLC30A1, SMAD3, PLIN2, ATP6V0E1, CD48, EMP1, MT1X, SDC2, TM6SF1, MMP2, AQP9, ANXA5, KLF9, IGFBP7, FTH…	Up-regulated
237	WP_VITAMIN_D_IN_INFLAMMATORY_DISEASES_up	0.00289785	0.016952	0.59868	1.93442	11	22	IKBKG, DUSP1, IKBKB, SMAD4, NR3C1, SMAD3, PPP3CA, NFKBIA, NFATC1, MAP3K1, CHUK	Up-regulated
239	BEIER_GLIOMA_STEM_CELL_dn	0.000535332	0.00504383	0.46751	1.93113	1	64	COMMD1, BASP1, CD74, HLA-DPA1, LAPTM5, HLA-DRA, IGFBP3, KLF7, HLA-DQA1, LRCH2, AZIN2, HLA-DMB, FTH1, CUEDC1, FZD6, EIF4E3, HLA-DQB1, GANC, HLA-DRB1, CCND1, TCEAL7, SLC11A2, TAF8, ECD, SOS2, PORCN, IFIT5, HNMT	Up-regulated
241	TAKEDA_TARGETS_OF_NUP98_HOXA9_FUSION_8D_dn	0.000337154	0.00422266	0.387932	1.92741	0	194	PLXDC2, SLCO2B1, FPR3, GXYLT2, TSPAN2, MMP14, TDO2, ANTXR1, GPR34, SLC11A1, SLC16A6, DAB2, C1QB, CLU, MSC-AS1, NRP1, AKAP13, RAB30, CD163, HK3, MMP9, ATP10D, S100A12, HLA-DQA1, S100A9, PCSK5, EMP1, HTRA1, TM6SF1, MAF, CR1, TMEM163, CCDC126, CDC42, C5AR1, SLC30A7, ADAM9, PP2672, C1QC, IL7R, CYBB, RAPH1, P2RY10, ADAM19, PLA2G7, PADI4, OLIG1, PID1, SGK1, CLEC7A, C16orf87, FCGR2B, LFNG, CTSB, HSD11B1…	Up-regulated
242	REACTOME_O_GLYCOSYLATION_OF_TSR_DOMAIN_CONTAINING_PROTEINS_up	0.000771605	0.00651506	0.522906	1.92722	2	38	ADAMTS4, ADAMTS16, THBS1, THBS2, ADAMTS1, B3GLCT, ADAMTSL4, THSD4, SPON1, ADAMTS7, CFP, SEMA5A, ADAMTS18, ADAMTS6	Up-regulated
243	GEISS_RESPONSE_TO_DSRNA_up	0.000771605	0.00651506	0.522655	1.9263	2	38	ADAR, GCH1, ANXA1, BNIP3, PLAUR, TNFAIP6, IQGAP2, SRGN, NFKBIA, IFIT1, TNFAIP3, FGF2, SUOX, IGFBP6, TFPI2	Up-regulated
244	VART_KSHV_INFECTION_ANGIOGENIC_MARKERS_up	0.000318674	0.00422266	0.397817	1.9262	0	160	SFRP2, TGFB3, PDGFRA, SFRP4, NRP2, TIMP1, SPARC, ANGPT2, FGFR1, EPHB1, HIF1A, SERPINF1, NRP1, ANGPTL1, ANGPTL2, CXCR4, MMP9, THBS2, F3, ITGAV, VEGFC, MMP2, S1PR1, ARL5C, ENG, PLAUR, STAB2, PTGS1, HPSE, CALCRL, WNT1, CXCL11, IL6ST, PHEX-AS1, OSMR, FZD6, CXCL12, PECAM1, CCR5	Up-regulated
245	TAVOR_CEBPA_TARGETS_up	0.000786576	0.00651506	0.494334	1.92595	2	49	RAB31, ID2, PTPRC, AKAP12, SERPINF1, C3AR1, GLIPR1, CXCR4, S100A9, GCH1, EXTL2, ANXA1, BCL2A1, FIG4, KCNMB1, SOD2, LST1, RGS2, ARG1, VCL, MLC1, LITAF, EEF1A2, ACSL1, PTX3, BTG1	Up-regulated
246	LEE_AGING_MUSCLE_dn	0.000513875	0.00502717	0.513087	1.92553	1	41	COL3A1, COL1A2, APBB2, USP50, PTPRR, PMP22, COL1A1, NDN, PPP3CC, BMP8B, GFER, IL6ST, PLA2G7, SIN3A, ZNF101, TST, LONP1	Up-regulated
247	HORIUCHI_WTAP_TARGETS_up	0.000374532	0.00435916	0.36848	1.92286	0	288	EMCN, QPCT, ACTA2, ENTPD4, TFEC, FBN1, CD58, ANKRD12, HIVEP2, GLIS3, TAGLN, PTPRM, MID2, ANKRD6, MAN1C1, CPQ, VCAM1, SAR1A, TMEM45A, OSTM1, CFH, FNDC3B, HTR2B, PMP22, TSPYL5, NR3C1, SSH1, CD200, CD109, C2CD2, DKK3, GLCCI1, COL5A1, ZEB2, SLC2A3, BST1, TMEM200A, PLPP3, PTGS1, NR1D2, FRMD3, TMEM127, ZFP36L1, PARP6, C6orf58, GABBR1, ABHD5, CNPPD1, RFTN1, IL7R, VLDLR, DUSP4, BAMBI, PRCP, OSMR, ASAH1, …	Up-regulated
248	WP_SIMPLIFIED_INTERACTION_MAP_BETWEEN_LOXL4_AND_OXIDATIVE_STRESS_PATHWAY_up	0.00262279	0.0157333	0.631808	1.92126	10	18	FN1, ANXA5, IGFBP7, FGF7, LOXL4, NRF1, NFE2L2, SIRT1	Up-regulated
249	RUTELLA_RESPONSE_TO_CSF2RB_AND_IL4_dn	0.000386847	0.00441085	0.364791	1.9152	0	308	DMXL2, VSIG4, MYOF, C3, SPARC, BHLHE41, EMC7, MPRIP, VCAN, IRAK3, SLC16A6, CHST15, SP110, DAB2, RHOQ, EGR1, SLC43A3, CTSK, BCAT1, NREP, MT2A, C3AR1, CD163, AKR1B1, PLTP, RGCC, ARHGEF6, S100A12, HLA-DQA1, S100A9, LMO2, MS4A6A, NR4A2, SLC30A1, SMAD3, PLIN2, CD48, EMP1, MT1X, TM6SF1, AQP9, ANXA5, KLF9, IGFBP7, LAIR1, SPOCK1, SLC2A3, ZFAND5, EIF2AK2, C5AR1, IQGAP2, AMY1A, LILRA2, CFP, CCR1, ACADVL, F…	Up-regulated
250	WP_SIMPLIFIED_DEPICTION_OF_MYD88_DISTINCT_INPUTOUTPUT_PATHWAY_up	0.00286123	0.0168036	0.628983	1.91267	11	18	TLR7, TIFA, TLR10, TLR4, TRAF6, TLR8, IL1A	Up-regulated
252	MORI_LARGE_PRE_BII_LYMPHOCYTE_dn	0.000791766	0.00652274	0.475336	1.90797	2	56	CD74, PTPRC, PIP4K2A, VCAM1, HLA-DQA1, CTSH, ITGAV, HLA-DMB, LCP1, IGKV1D-12, SAMHD1, GPR65, RASA3, HIP1R, PTPN6, LPP, MACF1, IL10RA, GNS, CD83, CD22	Up-regulated
253	SARTIPY_BLUNTED_BY_INSULIN_RESISTANCE_up	0.00286123	0.0168036	0.62735	1.90771	11	18	FRMD6, SKIL, SERPINE1, MNDA, RGL1, MT1X	Up-regulated
257	SANA_TNF_SIGNALING_dn	0.000278009	0.00422266	0.44087	1.90366	0	80	BGN, POSTN, EMCN, ANTXR1, MYOF, PALMD, EFEMP1, LDB2, CLU, ARHGDIB, ZNF521, RGS4, PRKACB, LYVE1, ANXA1, ALDH1A1, CALCRL, RHOJ, NT5E, PECAM1, ZBTB47, AHNAK2	Up-regulated
258	ZHAN_MULTIPLE_MYELOMA_CD1_dn	0.000777807	0.00651506	0.502269	1.90324	2	43	CLIC2, PRKD3, BHLHE41, SIK1, UCP2, CNTN4, CD59, RAB3B, CPNE5, LAX1, TNS3, TRAM2, STARD5, ADAM19, FUT8, CPEB4, UGCG	Up-regulated
259	ZIRN_TRETINOIN_RESPONSE_up	0.0033381	0.0189582	0.62551	1.90211	13	18	VGLL3, AKAP12, NID2, THSD4, PLAUR, TINCR, PLK2, VMP1, SLC38A2, SLCO2A1	Up-regulated
260	YAO_TEMPORAL_RESPONSE_TO_PROGESTERONE_CLUSTER_0_up	0.000830335	0.00666798	0.452864	1.90148	2	71	LOX, RHOQ, BBS9, GABARAPL1, IGFBP3, NREP, ANGPTL2, CFH, CASP4, TEF, GEM, DKK3, GLRB, BNIP3, NR1D2, FOXP1, NT5E, PLA2G7, RTN2, ABCA1, NGEF, TMEM159, SASH1, DDX6, EPHX1, CCNG2, MAP1LC3B, EPS8	Up-regulated
261	REACTOME_IMMUNOREGULATORY_INTERACTIONS_BETWEEN_A_LYMPHOID_AND_A_NON_LYMPHOID_CELL_up	0.00032352	0.00422266	0.391154	1.89929	0	165	IGKV1-33, COL3A1, C3, COL1A2, IGLV1-40, IGKV1-5, VCAM1, IGKV2-28, IGKV3-11, CLEC2B, ITGB1, IGKV3-15, IGLV1-47, SLAMF7, IGKV2D-28, IGKV1D-33, IGKV4-1, SLAMF6, COL1A1, CD200, CD96, SIGLEC12, IGKV1D-12, IGKV1D-39, IGKV1D-16, IGHV2-70, LAIR1, COL17A1, CD300LG, FCGR3A, IGLV3-19, LILRA2, IGLV3-27, OSCAR, TREML1, SH2D1A, IGHV4-59, CD99, PILRA, CRTAM, IGKV3D-20, ICAM1, IGLC3, HLA-E, SIGLEC1, FCGR2B, CD22…	Up-regulated
262	WP_MIRNAS_INVOLVEMENT_IN_THE_IMMUNE_RESPONSE_IN_SEPSIS_up	0.000766088	0.00651506	0.522192	1.89817	2	36	IKBKG, VCAM1, TLR7, TAB2, IKBKB, TLR4, TRAF3, IRF5, TRAF6, NFKBIA, ICAM1, TLR8, IL1A, CCL3, GZMB, NFKB2, CHUK	Up-regulated
263	SMIRNOV_CIRCULATING_ENDOTHELIOCYTES_IN_CANCER_up	0.000315557	0.00422266	0.393139	1.89797	0	155	CYP1B1, SMAD7, DSE, SPARC, SLC23A2, IRAK3, CD58, SKIL, SLC16A6, EGR1, CLU, IGFBP3, BCAT1, C3AR1, RGS1, THBS1, PMP22, ABCG1, PLIN2, RARA, AQP9, DKK3, IFNGR2, SLC2A3, ENG, BST1, C5AR1, MPP1, CDA, HPSE, KDM5B, HCK, CDKN1A, CCR1, LRRC17, ZNF134, DUSP4, CYP27A1, FCGR2A, TLR8, KIT, KCNJ15, ABCA1, ADAP2, CTSB, SLA, QSOX1	Up-regulated
264	NEWMAN_ERCC6_TARGETS_dn	0.00102119	0.00775783	0.517444	1.89531	3	37	ITGBL1, CCDC80, MFAP5, COL11A1, SERPINE1, RGS4, ADAMTS1, AEBP1, RAB3B, LRCH2, PAGE2, PTGS1, CDKN1A	Up-regulated
265	RICKMAN_HEAD_AND_NECK_CANCER_F_up	0.000798935	0.00654484	0.477231	1.89501	2	54	APOD, CYP1B1, ABCA8, PKIA, PTGIS, DCLK1, CHRDL1, NEXN, CSRP3, ACTA1, TPM1, MYH1, DDIT4L, TNNC2, ZFPM2, ANKRD39, TNNC1	Up-regulated
267	DAUER_STAT3_TARGETS_up	0.000784929	0.00651506	0.48808	1.89018	2	47	GFPT2, SLC2A14, C3, AKAP12, THBS1, AGT, SLC2A3, FLNB, PLPP3, SERPINB3, STAT3, KLF11, ZFP36, ICAM1, SOD2, UGCG, ABCA1, CTSB, TEAD4, SLC4A7	Up-regulated
270	AKL_HTLV1_INFECTION_dn	0.000539229	0.00505499	0.454238	1.88817	1	66	FRY, ADGRL2, TMEM45A, MEIS2, ITGB1, PKIA, MAOA, CTSA, CD96, IGFBP7, ANXA1, MDFIC, UBE2J1, PRUNE2, GPR65, RWDD1, DUSP4, GNLY, ADGRE1, ATP8A2, PECAM1, SERINC1	Up-regulated
271	REACTOME_CELL_SURFACE_INTERACTIONS_AT_THE_VASCULAR_WALL_up	0.000327225	0.00422266	0.38369	1.88661	0	178	FN1, IGKV1-33, CD74, JAM2, SDC1, COL1A2, ANGPT2, CD58, IGLV1-40, IGKV1-5, IGKV2-28, IGKV3-11, ITGB1, IGKV3-15, IGLV1-47, ITGA5, GYPC, PPIL2, IGKV2D-28, IGKV1D-33, IGKV4-1, CD84, SELPLG, ITGAV, COL1A1, CD48, SDC2, CD99L2, PROCR, IGKV1D-12, SLC7A8, IGKV1D-39, IGKV1D-16, IGHV2-70, SLC7A6, VPREB3, IGLV3-19, SOS1, IGLV3-27, PTPN6, FCAMR, IGHV4-59, CD99, TNFRSF10B, ITGAX, IGKV3D-20, OLR1, PECAM1, IGLC3…	Up-regulated
273	CAIRO_HEPATOBLASTOMA_CLASSES_dn	0.000339098	0.00422266	0.376412	1.8852	0	204	COPZ2, LAMA2, DCN, EMCN, FRY, FABP3, SMAD7, ZEB1, SGCB, HIVEP2, EGR1, CSRP2, C1S, LDB2, C1R, MAN1C1, GABARAPL1, ZCCHC24, MAST4, KANK2, TTC9, CASP4, CD59, SLC30A1, C1QTNF3, ZBTB20, SMAD3, SLC10A1, CDC42EP3, LMOD1, C7, HTRA1, AQP9, ECM1, DKK3, SVEP1, FAT4, DEPDC5, CYLD, TK2, ENG, NR1D2, SPON1, SLCO1B3, FMO4, ITGA8, IL6ST, MMRN2, NFKBIA, VSTM4, TRANK1	Up-regulated
275	PID_BCR_5PATHWAY_up	0.000536913	0.00504383	0.458344	1.88421	1	63	IKBKG, PLCG2, PTPRC, IKBKB, PPP3CA, PPP3CC, POU2F2, SOS1, MALT1, BCL2A1, PTPN6, TRAF6, NFKBIA, NFATC1, MAPK1, PAG1, FCGR2B, CD22, FOS, BLNK, MAP3K1, PIK3R1, DAPP1, BTK, CHUK, HRAS	Up-regulated
276	EBAUER_MYOGENIC_TARGETS_OF_PAX3_FOXO1_FUSION_up	0.000785958	0.00651506	0.48394	1.88323	2	48	COL6A3, ACTA2, PALMD, TAGLN, PDLIM5, CRYAB, BORCS8, AEBP1, MRAS, TPM1, MYH1, LDB3, TNNC2, MACF1, UTRN, BCAN, TNNC1	Up-regulated
277	VALK_AML_CLUSTER_9_up	0.00126486	0.00891171	0.523586	1.88156	4	34	VSIG4, SPARC, PTPRM, NRP1, ST18, RUNX3, CD59, AK5, MYH11, NT5E, EMID1, FCGR2B, MSLN, MN1, CLIP2, CD81, FAM171A1, TPPP3, COLEC12, DHRS3	Up-regulated
278	KHETCHOUMIAN_TRIM24_TARGETS_up	0.000783085	0.00651506	0.487525	1.8804	2	46	LGALS1, SPARC, COL1A2, EGR1, LAPTM5, VCAM1, UCP2, SERPINE1, ITGAV, COL1A1, EMP1, HCK, CDKN1A, CYBB, TGFBR2, ICAM1, JUNB, FOS, VIM, SPP1, APP, FGFR2, COL4A1	Up-regulated
279	PECE_MAMMARY_STEM_CELL_dn	0.000307882	0.00422266	0.395944	1.88012	0	139	BGN, FN1, LUM, MMP14, TRPC1, FAP, SHQ1, VCAN, COL6A1, VCAM1, NREP, ITGB1, CALD1, NID1, EMP1, DDX3X, DEGS1, SLC7A6, TRIO, TUG1, SLC30A7, TIA1, SPON1, BTBD19, FGFR1OP2, KITLG, GABBR1, DENND4C, NEMF, TMEM230, TCF7L2, TPM4, DERL1, NCBP3, NBPF14, JAK1, COG6, TXNIP, APP, ZDHHC6, KCNQ1OT1, GOLGA8A	Up-regulated
282	VANHARANTA_UTERINE_FIBROID_up	0.000775795	0.00651506	0.497602	1.87714	2	42	EDNRA, FN1, MFAP2, SULF1, COL3A1, CRMP1, GPM6B, HTR2B, COL1A1, ERCC3, LTBP2, FDXR, ZMAT3, CCND1, COL9A2, TRPS1, COL4A1, SOX4, ART4	Up-regulated
283	ZIRN_TRETINOIN_RESPONSE_WT1_up	0.0038638	0.0213223	0.580713	1.87636	15	22	PDGFRA, ETV1, AKAP12, IGFBP3, SMAD3, PLAUR, KIT, CLDN11, IGFBP6, SNX8, DLC1, DHRS3, RARRES1	Up-regulated
284	KONDO_EZH2_TARGETS_up	0.000343761	0.00422266	0.372176	1.87564	0	217	ITGBL1, ID2, COL3A1, ZEB1, ABI3BP, SPARC, TTC28, C1S, GULP1, LPAR6, VPS13C, NRP1, AKAP13, ANOS1, TMEM45A, IGFBP3, APBB2, HEMGN, IGFBP5, SERPINE1, CMTR2, CPE, ANO1, CD59, MSX2, SSPN, RAB3B, IL6R, SLAMF6, COL1A1, WWTR1, EMP1, ELMO1, KLF9, TACR1, DSEL, RBP4, TNRC6B, SPOCK1, HAS3, PCLO, TNFAIP6, PRSS35, KRTAP4-12, BCL2A1, FABP4, SERPINB3, MAB21L2, MATN3, LOXL4, MCPH1, NT5E, GABARAPL2, EDIL3, RBMS3, C…	Up-regulated
285	REACTOME_RAF_INDEPENDENT_MAPK1_3_ACTIVATION_up	0.00362406	0.0202487	0.571884	1.87345	14	23	DUSP1, IL6R, JAK2, DUSP4, IL6ST, MAPK1, JAK1, DUSP10, PEA15, TYK2	Up-regulated
286	REACTOME_GLYCOSAMINOGLYCAN_METABOLISM_up	0.000302297	0.00422266	0.401174	1.8694	0	124	BGN, DCN, LUM, ARSB, OMD, CHST11, DSE, SDC1, VCAN, OGN, CHST15, HS2ST1, PAPSS1, SDC2, DSEL, IDS, LYVE1, CHP1, HAS3, CHST9, STAB2, HPSE, B4GALT7, HSPG2, ST3GAL4, NAGLU, FMOD, CHSY1, HS3ST6, CSGALNACT2, HS3ST2, GNS, CHST14, BCAN, HS6ST1, ST3GAL1, HAS1, HS3ST5, HAS2, CHST1	Up-regulated
287	ZHANG_ANTIVIRAL_RESPONSE_TO_RIBAVIRIN_dn	0.0007768	0.00651506	0.489759	1.86803	2	44	MAP4K5, CYP1B1, SERPINE1, VEGFC, GEM, RAPGEF3, SOCS2, PPP3CC, AHR, IRF5, UBE2D3, PPP1R3C, PLK2, TNFRSF9, DUSP10, FGF2, CCL3	Up-regulated
288	CHUNG_BLISTER_CYTOTOXICITY_dn	0.0007768	0.00651506	0.489574	1.86732	2	44	HACD4, IRAK3, PLCG2, STXBP5, MNDA, BIN2, PPM1A, CDC42EP3, CSTA, GAS7, CFP, FKBP1A, FOXP1, PCMTD1, MED13L, NIN, VCL	Up-regulated
289	HOELZEL_NF1_TARGETS_dn	0.000291715	0.00422266	0.404613	1.86688	0	114	BGN, FN1, NR2F2, PDGFRA, MFAP2, AASS, COL3A1, ST6GAL2, UBE2E2, ADCY1, SERPINF1, NREP, FSTL1, IGFBP5, ARHGAP28, TSPYL5, GUCY1A2, PRKD1, AK5, ADAMTS1, CD200, C7, ST8SIA2	Up-regulated
291	ICHIBA_GRAFT_VERSUS_HOST_DISEASE_D7_up	0.000294898	0.00422266	0.405941	1.86456	0	112	IFI16, MSR1, CD74, CD53, CDC42SE2, SLC11A1, C1QB, HLA-DRA, VCAM1, MNDA, HLA-DQA1, IRGM, HLA-DMB, PKM, PROCR, FLOT1, PTGS1, SAMHD1, FGL2, HCK, BCL2A1, C1QC, LY75-CD302, IL6ST, NFKBIA, LY6H, ADGRE1, LYZ, ICAM1, N4BP1, GBP2, MS4A4A, HLA-DRB1, GBP4, LITAF, TMSB10, COL4A1, UBA7, NAMPT, SHISA5	Up-regulated
292	KEGG_ACUTE_MYELOID_LEUKEMIA_up	0.000794281	0.00652727	0.461634	1.85951	2	57	RUNX1, IKBKG, PIK3R5, RPS6KB2, IKBKB, LEF1, RARA, SPI1, SOS1, STAT3, ZBTB16, PIM1, MAPK1, TCF7L2, AKT2, KIT, FLT3, CCND1, RUNX1T1, PIK3R1, PML, CHUK, HRAS, PIK3CB, SOS2, AKT1, STAT5B	Up-regulated
293	WANG_MLL_TARGETS_up	0.000371333	0.0043445	0.356933	1.85918	0	284	SFRP2, HTR2A, ASPN, GLT8D2, COL10A1, POSTN, MMP14, SFRP1, CCDC80, OMD, ETV1, ABI3BP, JAM2, MGP, SLIT3, DAB2, MEG3, MME, COL6A1, HOXC9, PTPRM, SHOX2, CPQ, ARHGDIB, GPM6B, GDA, FAM20A, COL14A1, ARHGEF6, TTC9, THBS2, DPYD, AGT, NR4A2, CYP2F1, VEGFC, MMP2, MAF, RNF144A, DKK3, COL6A2, SVEP1, STEAP4, S1PR1, KCNC2, WFDC21P, EMILIN1, FBXL7, FABP4, AVPR1A, PLEK, NFATC4, NAALAD2, ABCA9, EBF3, B3GALT4, ADAM…	Up-regulated
294	IIZUKA_LIVER_CANCER_PROGRESSION_L1_G1_up	0.00478354	0.0250996	0.590416	1.85713	19	20	ID2, BNIP3L, C1R, IGFBP3, FERMT2, MAF, PRCP, FOS	Up-regulated
296	REACTOME_CRMPS_IN_SEMA3A_SIGNALING_up	0.00427655	0.023144	0.630614	1.85364	17	16	CRMP1, DPYSL4, NRP1, PLXNA1, GSK3B, DPYSL3	Up-regulated
297	HU_GENOTOXIN_ACTION_DIRECT_VS_INDIRECT_4HR_up	0.00102881	0.0077873	0.502733	1.85287	3	38	LOXL1, SNAI2, ZEB1, CD28, NRP1, ATP6V0A2, UBC, RSRP1, NFKBIA, ACTB, TMEM230	Up-regulated
298	WIEDERSCHAIN_TARGETS_OF_BMI1_AND_PCGF2_up	0.00105569	0.00787728	0.461536	1.85258	3	56	CCDC80, INHBA, MYOF, NAV1, CRISPLD2, COL5A1, PLAUR, IL7R, NET1, TPM1, ADAM19, BCL7A, RREB1, CPA4, LFNG, CCND1, TIMP3, S100A2, EDN1, P4HA2	Up-regulated
299	PID_TGFBR_PATHWAY_up	0.000795334	0.00652727	0.467805	1.85125	2	53	TGFB3, SMAD7, SKIL, DAB2, SMAD2, TGFB2, TAB2, SMAD4, SMAD3, ARRB2, SOS1, CAMK2A, FKBP1A, PPP2CA, BAMBI, DYNLRB1, ZFYVE16, TGFBR2	Up-regulated
300	PID_AVB3_OPN_PATHWAY_up	0.00174	0.0113824	0.525501	1.85099	6	31	PIP5K1A, MMP9, ITGAV, MMP2, CDC42, ROCK2, NFKBIA, MAPK1, FOS, GSN, SPP1, MAP3K1, PIK3R1, ILK, CHUK, BCAR1, PTK2B	Up-regulated
302	AMIT_EGF_RESPONSE_60_HELA_up	0.0007768	0.00651506	0.484829	1.84923	2	44	SNAI2, SERPINE1, RUNX3, NCKAP1, NR4A2, PKM, CITED2, SLC2A3, ZFP36L1, DNAJC24, KCNJ12, SLC20A1, SOD2, UGCG, FOSL2, CCND1, NR4A3, FOXC1, FOSB, LIF	Up-regulated
303	WOTTON_RUNX_TARGETS_dn	0.00175615	0.0114379	0.535705	1.84753	6	29	PRRX1, ID2, ERRFI1, NR3C1, ALCAM, TENM4, SGPP1, RNF144A, KITLG, PLOD2, RGS2, MSLN	Up-regulated
304	TING_SILENCED_BY_DICER_up	0.00346278	0.0195179	0.549935	1.84679	13	26	SFRP4, GBP3, SPARC, CXCR4, RGCC, RTN1, RASGRP1, CPEB2, VIM, ZNF550, SERTAD4, NANOS1	Up-regulated
305	SUZUKI_RESPONSE_TO_TSA_AND_DECITABINE_1A_up	0.00480307	0.0251522	0.598495	1.84583	19	19	COL6A3, LAMA2, SFRP1, ANGPT2, ADGRL2, FOLH1, SNRPN	Up-regulated
307	TAKEDA_TARGETS_OF_NUP98_HOXA9_FUSION_10D_dn	0.000311624	0.00422266	0.386396	1.84182	0	143	OLFML2B, SLCO2B1, FPR3, TSPAN2, NRP2, FABP3, DAB2, C1QB, MSC-AS1, SERPINF1, NRP1, MMP9, TLR7, RGCC, RGL1, CD59, PCSK5, RTN1, MAOA, EMP1, MAF, SLC7A8, RASGRP1, C5AR1, PLPP3, C1QC, MMP8, IL7R, RAPH1, PLA2G7, PADI4, OLIG1, PID1, HS3ST2, LHFPL2, ABHD12, SGK1, KCNJ15, TACSTD2, GAPLINC, SGTB, A2M, CTSB, OTOA, CCL3, NPL, BLNK	Up-regulated
308	ADDYA_ERYTHROID_DIFFERENTIATION_BY_HEMIN_up	0.000819672	0.0066539	0.43394	1.83762	2	73	ID2, SLC2A14, EGR1, SLC43A3, MT2A, UCP2, NLRP1, LMO2, CTSH, ATF5, SOCS2, PTPN7, FTH1, AAK1, PIM1, FDXR, FCGR2A, NFYA, ITGB5, HBZ, APOC1, AKR1C1, PTP4A3, RTN4, TXNIP, NPL, HSPA5, NCOA1, MCL1, MAFG	Up-regulated
309	ZHENG_FOXP3_TARGETS_IN_THYMUS_up	0.000337154	0.00422266	0.369688	1.83676	0	194	NEK7, MBNL1, ZFAND6, ANKRD12, ERRFI1, HIVEP2, SLAMF1, CD28, WNK1, PIP4K2A, HIF1A, GPR183, AKAP13, RGS1, CXCR4, CBLB, NR3C1, CPE, CD84, ZBTB20, SLAMF6, SOCS2, PPP3CC, CITED2, IDS, GLCCI1, ZBTB25, TRIO, DOCK10, MDFIC, RAB8B, ATP6V1A, SAMHD1, IRF4, MALT1, SDCBP, HEATR5A, IFNAR2, TBC1D15, IL7R, AP4S1, RFX3, CELF2, P2RY10, NT5E, IPCEF1, TNFSF11, MAN1A2, TNFAIP3, INPP4B, STAT4, ZC3HAV1, VOPP1, GBP2, KA…	Up-regulated
310	HERNANDEZ_MITOTIC_ARREST_BY_DOCETAXEL_1_up	0.00176101	0.0114469	0.514592	1.83313	6	33	EMP3, FABP3, ABI3BP, LIX1L, DUSP1, RGCC, AGT, VEGFC, TACR1, SGK1, GAGE12F, SPP1, TIMP3, VAMP8, CGA	Up-regulated
311	SUNG_METASTASIS_STROMA_up	0.000292826	0.00422266	0.402552	1.83135	0	107	SNAI2, THY1, COL3A1, BNIP3L, SPARC, PSD3, DCBLD2, VCAN, ANOS1, SEC24D, LMO4, TUSC3, EIF2B3, THBS2, TMEM47, CD59, CNN3, ALCAM, CDC42EP3, SVEP1, COL5A1, SOCS5, TRIO, HSPG2, PLOD2, EDEM1, PLK2, MAPK1, CD55, SPSB1, SNX1, CDH6, PINK1, TNC, JUNB, CPEB2, CLDN11, AKR1C1	Up-regulated
312	ZHENG_GLIOBLASTOMA_PLASTICITY_dn	0.00105569	0.00787728	0.455976	1.83026	3	56	THY1, NISCH, EPHB1, DZIP1, CLU, TRIM5, ITGA5, CRYAB, CD109, EMP1, COL6A2, EMILIN1, LPAR1, ZFP36, RHOU, FOSL2, PVALB, DDHD1, TIMP3, TST, ZDHHC14, PCOLCE2, COL4A1, FOSB, CNGA2, SORL1, LSAMP	Up-regulated
313	REACTOME_SEMAPHORIN_INTERACTIONS_up	0.000536913	0.00504383	0.444956	1.82918	1	63	CRMP1, PLXND1, PTPRC, DPYSL4, NRP1, PLXNA1, ITGB1, GSK3B, DPYSL3, RHOC, SEMA3E, MYH11, PLXNC1, LIMK1, ROCK2, SEMA5A, MYL6, MYL9, PAK3, MYH9, PIP5K1C, CDK5R1, TREM2, SEMA6D, TYROBP, ARHGAP35	Up-regulated
315	BLANCO_MELO_BRONCHIAL_EPITHELIAL_CELLS_INFLUENZA_A_INFECTION_up	0.000608458	0.00554166	0.390419	1.82648	1	127	BICC1, POSTN, ID2, SEC24A, COL6A1, C1S, GULP1, THBS1, TMEM47, ARRDC3, SLC30A1, ITGAV, CD109, CRYBG3, EIF2AK2, PTGS1, NR1D2, SAMHD1, ZNF551, ZNF674-AS1, ROCK2, CXCL11, SERPINB4, IL7R, CLDN16, HERC5, SLFN5, MAN1A2, TRANK1, EDIL3, UGDH, TNFAIP3, ICAM1, CD83, SDK1, ITPR1, RAD54L2	Up-regulated
318	SANA_RESPONSE_TO_IFNG_up	0.000830335	0.00666798	0.432944	1.81784	2	71	GBP3, CD74, HLA-DPA1, C1S, CFH, HLA-DQA1, SSPN, PPP3CA, SAMHD1, BST2, VAMP5, CXCL11, IL23A, IFIH1, MX1, UBE2L6, SERPING1, SAMD9L, HLA-DQB1, HLA-E, HLA-DRB1, CX3CL1, SLC25A28, GBP4, PARP14, IDO1, APOL2, RNF213, HLA-B, PARP9, HLA-DRB5	Up-regulated
319	HERNANDEZ_ABERRANT_MITOSIS_BY_DOCETACEL_2NM_up	0.000814332	0.00662255	0.433908	1.81764	2	69	RAB31, IFI16, PRKD3, CHST11, BNC2, PTPRM, LPAR6, SERPINF1, ARHGDIB, THBS2, FOLH1, AGT, MAF, LCP1, PPP2R3A, IQGAP2, SH2D1A, VLDLR	Up-regulated
321	WANG_HCP_PROSTATE_CANCER_up	0.000578369	0.0053108	0.400373	1.81361	1	103	FN1, CYP1B1, EFEMP2, FGFR1, CLIC3, GSPT2, PDLIM5, IGFBP3, MEIS2, DUSP1, AFF1, NR3C1, CTSA, HTRA1, WWC1, CITED2, FTH1, CD2BP2, SIDT2, ZNF419, LAMP3, CD55, RPL28, SGK1, RGS2, AUTS2, FOSL2, MSLN, FLNC, P3H2, TXNIP	Up-regulated
322	GRAHAM_NORMAL_QUIESCENT_VS_NORMAL_DIVIDING_up	0.00131961	0.00919622	0.451503	1.81231	4	56	INHBA, EVI2A, PTPRC, GLIPR1, NR4A2, NRIP1, EMP1, FTH1, FNBP1, CYTIP, DST, ALDH1A1, CXCL11, TPBG, TNFSF4, TCF7L2, SOD2, STAT4, MPZL2, GBP2	Up-regulated
323	PAPASPYRIDONOS_UNSTABLE_ATEROSCLEROTIC_PLAQUE_dn	0.00205761	0.0129497	0.491556	1.81168	7	38	CSRP2, PTGIS, LMOD1, DSEL, MYH11, PAM, PMEPA1, FMOD, KCNMB1, EID1, GJA1, MXRA7, CPED1, PRELP, JAM3, HSPB1, MYLK	Up-regulated
324	CASORELLI_ACUTE_PROMYELOCYTIC_LEUKEMIA_up	0.000319693	0.00422266	0.373509	1.81151	0	162	DMXL2, TIMP1, ID2, CHST11, EVI2A, ZFAND6, SIK1, GPR183, GLIPR1, ATP2B4, NLRP1, DUSP1, RGCC, FNDC3B, IGKV1D-13, CBLB, CMAHP, NR4A2, ALCAM, ITM2B, CD96, CITED2, IGFBP7, ZFAND5, SIPA1L1, UBBP1, CFP, SF1, DRG1, AAK1, TPBG, FGF13, ZNF185, NFKBIA, GNLY, SLC31A2, NFYA, TCF7L2, CSGALNACT2, SERPING1, RBMS1, ZFP36, RGS2, AUTS2, WASL, MED13L, UBE2D4, KAT6B, FOS, FLT3, MXRA7, RNF11, ANKS1A, IGKV3-20	Up-regulated
325	PID_IL6_7_PATHWAY_up	0.000784929	0.00651506	0.4674	1.81009	2	47	TIMP1, PIAS1, LMO4, IL6R, VAV1, JAK2, SOS1, PIAS3, HCK, STAT3, IL6ST, GAB1, TNFSF11, JUNB, JAK1, FOS, A2M, PIK3R1, MCL1, FOXO1, TYK2, AKT1	Up-regulated
327	HUMMERICH_SKIN_CANCER_PROGRESSION_dn	0.000285144	0.00422266	0.402465	1.80846	0	98	PDGFRA, LGALS1, NRP2, COQ5, ID2, COL3A1, CHST11, C3, SMAD4, ATP6V0B, AEBP1, DUSP14, PC, COL6A2, DST, C4B, ZYX, PPP1CB, MYH1, EYA2, MYL9, TNNC2, LYZ, SERPING1, LTBP3, GJA1	Up-regulated
329	WANG_RESPONSE_TO_GSK3_INHIBITOR_SB216763_up	0.000408831	0.00453829	0.338034	1.80493	0	354	PLXDC2, DMXL2, ALOX5AP, HACD4, PIP5K1A, CD74, EVI2A, PTPRC, SNORD116-1, DENND4B, SLX4IP, PHF21A, SCIMP, DYM, CXCR4, CD68, SHISA7, PSTPIP2, SCAPER, ERV3-1, FRRS1, ATP10D, PRDM1, CTSH, OMA1, ARRDC3, CD84, PAPSS1, ALCAM, ORMDL1, SNRPN, CD48, CSTA, ATP6AP1L, ELMO1, ANXA5, ZNF429, ATP8B4, TTC37, MS4A7, IDS, NAIP, TMEM106B, R3HDM2, MYO5A, AMY1A, ATP6V1A, ZFAND3, FGL2, LIG4, RSRP1, PSAP, SYCP2L, DZIP3, …	Up-regulated
332	APPEL_IMATINIB_RESPONSE_up	0.00301887	0.0174324	0.506335	1.80372	11	33	GBA, APOD, MSR1, CD163, CD68, CTSH, CTSA, ENG, C5AR1, ASAH1, GNS, APOC1, CTSB, LAMP2	Up-regulated
334	VILIMAS_NOTCH1_TARGETS_up	0.00105097	0.00787728	0.46028	1.80184	3	50	THY1, ID2, CD74, EGR1, CD28, BCL2A1, TNFRSF18, NFKBIA, P2RY10, NFATC1, IL10RA, ICAM1, CD83, JUNB, CX3CL1, TRAT1, GZMB, NFKB2	Up-regulated
335	ZHU_CMV_8_HR_dn	0.00131096	0.00916445	0.462444	1.80171	4	49	NR2F2, RUNX1, ID2, ZNF521, NR3C1, ENG, AHR, FGF7, ZFP36L1, ACO1, IL6ST, TCF7L2, RBMS1, MYH9, ADRA2A, AKR1C1, GAS1, APOE, MN1, MARCKS, HNMT, ACVR2A	Up-regulated
336	LEE_SP4_THYMOCYTE_up	0.00639962	0.0315823	0.624293	1.79914	26	15	TPRG1, HTR2B, NR4A2, PDE4D, DUSP4, EGR3, SERPINE2	Up-regulated
337	PID_CXCR4_PATHWAY_up	0.000570451	0.00527049	0.400425	1.79559	1	97	GNAI2, PTPRC, PIK3R5, HLA-DRA, ITGA11, RGS1, CXCR4, ITGB1, MMP9, ITGA5, SSH1, ITGAV, RHOC, GNB1, GNAO1, VAV1, ARRB2, GNAI3, CDC42, JAK2, LIMK1, HCK, PTPN6, STAT3, ITGA8	Up-regulated
338	KEGG_HYPERTROPHIC_CARDIOMYOPATHY_HCM_up	0.000550964	0.00514348	0.412116	1.79021	1	82	TGFB3, LAMA2, SGCB, ITGA11, CACNG7, ITGB1, TGFB2, ITGA5, CACNB2, ITGAV, CACNG3, ITGB6, SGCA, RYR2, ITGA8, TPM1, ITGB4, ACTB, TPM4, ITGB5, PRKAA2, PRKAA1, CACNG2, TNNC1	Up-regulated
339	HARRIS_BRAIN_CANCER_PROGENITORS_up	0.00232739	0.0142668	0.474411	1.78966	8	42	BGN, SCG5, SRPX2, PLPPR4, MGP, COL6A1, CASP4, COL6A2, GPR17, ARHGAP29, PID1, MLIP, OPCML, KCNA4, GJA1	Up-regulated
340	PHONG_TNF_RESPONSE_VIA_P38_PARTIAL_up	0.000319081	0.00422266	0.370408	1.78942	0	158	NR2F2, PCDH7, INHBA, ID2, CHST11, HIVEP2, SEMA3C, GABARAPL1, GLIPR1, KCNN4, SERPINE1, DUSP1, TGFB2, THBS1, FNDC3B, KANK2, SMAD3, ALCAM, ITGAV, HIVEP1, WWC1, CITED2, IFNGR2, TNS3, CYLD, PLAUR, DNAJB9, PLPP3, HOXA5, CDKN1A, STAT3, TNFRSF10B, IL6ST, SLC31A2, PLK2, TCF7L2, TNFAIP3, SLC20A1, RGS2, FOSL2, TNC, JUNB, BID, DUSP10, HAS2, KYNU, NFKB2, LITAF, SERPINB2, NAMPT, MCL1, CCNG2, FOXO1, LIF, PTX3, …	Up-regulated
341	MCGARVEY_SILENCED_BY_METHYLATION_IN_COLON_CANCER_up	0.00232739	0.0142668	0.474255	1.78907	8	42	SFRP4, SFRP1, EFEMP1, LEF1, DKK3, ASCL2, RAB32, EYA4, FOXL2, ICAM1, ADAMTS18, TFPI2, CTAG2, INHBB, FOXQ1, DDX43, JAM3, CHFR	Up-regulated
342	CHEN_LVAD_SUPPORT_OF_FAILING_HEART_dn	0.00232739	0.0142668	0.474213	1.78891	8	42	JAM2, B3GALNT1, NRP1, B3GALT2, PTGIS, CACNB2, PDE4D, HEY2, IFIT1, PPP1R3C, CXCL12, C6, GJA1, KCNJ8, CTSB, PDE4B	Up-regulated
343	LEE_METASTASIS_AND_ALTERNATIVE_SPLICING_up	0.000829417	0.00666798	0.424208	1.7881	2	72	LGALS1, MFAP5, MGP, WNK1, PTPRM, TMEM45A, SMAD3, COL6A2, NAIP, FAT1, BNIP3, STAB2, BCL2A1, PIM1, SRPK2, TSPAN9, ITGB5, C6, BID, RTN4, SMO, TSPAN33, ANKS1A, BTK, NRCAM	Up-regulated
344	REACTOME_INSULIN_PROCESSING_up	0.00593619	0.0298877	0.531834	1.786	23	26	EXOC2, CPE, VAMP2, EXOC8, MYO5A, SLC30A7, ERO1B, EXOC7, INS, EXOC1, KIF5A, EXOC3, RAB27A, STX1A, ERO1A, SLC30A6, EXOC6	Up-regulated
349	BROWNE_HCMV_INFECTION_20HR_dn	0.000564972	0.00524149	0.398465	1.77679	1	94	BICC1, FRY, SRPX2, MBNL1, COL1A2, HMBS, PTPN13, RGS4, PMP22, SYNE1, ANXA1, TRIO, LRRC15, TRAM2, AHR, SIPA1L1, NR1D2, ROR2, DST, ACO1, FST, LPP, LTBP1, MACF1, FILIP1L, TNFRSF14, ATXN10, KIAA1549L, VCL, FGF2, RUNX1T1, ATP13A3, PDE4B, SERPINB2, BUB1B, TRAF3IP2	Up-regulated
350	WP_HUMAN_COMPLEMENT_SYSTEM_up	0.000570451	0.00527049	0.3962	1.77664	1	97	GNAI2, DCN, VSIG4, C3, C1S, C1R, LAMB1, C3AR1, CFH, THBS1, CD59, SELPLG, C7, CR1, ARRB2, PLAUR, GNAI3, C5AR1, FCGR3A, CSNK1A1, C4A, CFP, MASP2, ITGAX, CD55, SERPING1, ICAM1, C6	Up-regulated
351	SARTIPY_NORMAL_AT_INSULIN_RESISTANCE_dn	0.00786838	0.036651	0.583859	1.77545	32	18	B3GALT2, FBXO45, NR1D2, RSRP1, GAB1, PIK3C3, ABCA1, TXNIP, C16orf74, CCNG2, CREBRF	Up-regulated
352	TSENG_IRS1_TARGETS_dn	0.000613497	0.00556494	0.377574	1.77388	1	131	FRMD6, COL6A3, SFRP2, SNAI2, MMP14, COL3A1, DAB2, B3GALNT1, COL6A1, NRP1, SPARCL1, TMEM45A, CCDC88A, RAB3B, HTRA3, MAOA, ZNF821, DKK3, FTH1, SEMA3E, RAMP2, PLPP3, GGT5, ADARB1, FABP4, LPAR1, IL6ST, EBF3, LY6H, ZNF419, NFYB, CD63, ITPR1, GJA1, TNNC1, CST3, CTDSP2, TNXB, C11orf54, LITAF, COL4A1, PML, EPHX1, TRAF3IP2, RAB9A, MGST3, PRL, SIX1, DIAPH1, IL1R1, PPL	Up-regulated
354	WP_TYROBP_CAUSAL_NETWORK_up	0.00106355	0.00787728	0.434905	1.77207	3	60	C3, IGSF6, GPX1, RGS1, NPC2, DPYD, RUNX3, BIN2, CREB3L2, CD84, MAF, APBB1IP, FKBP15, C1QC, PLEK, ITGAX, HCLS1, GAPT, IL10RA, LHFPL2, ADAP2, TGFBR1, SPP1, TCIRG1, SAMSN1	Up-regulated
355	TONKS_TARGETS_OF_RUNX1_RUNX1T1_FUSION_ERYTHROCYTE_up	0.000626174	0.00563431	0.367438	1.77105	1	152	SCG5, VSIG4, IFI16, MYOF, FABP3, COL1A2, VCAN, IRAK3, RHOQ, PNRC1, C3AR1, CD163, PLTP, TLR7, FNDC3B, NRIP1, CD200, EMP1, SLC2A5, MAF, ADAMTSL4, ECM1, LAIR1, RASGRP1, HOMER3, LILRA2, BCL2A1, OLR1, HERC5, PLK2, TCF7L2, ATXN1, GBP2, PTP4A3, SPATS2L, APP, TFPI2, JAM3, EEF1A2, CPM, HSPB1, FUT4, CRHBP, NRCAM, ACSL1, SOX4	Up-regulated
357	HUANG_GATA2_TARGETS_up	0.000624805	0.0056333	0.36911	1.76843	1	147	RAB31, LGALS1, ALOX5AP, EMP3, EVI2A, GPX1, IRAK3, GABARAPL1, GLIPR1, KCNN4, NEURL3, AFF1, MNDA, CMTM7, PLIN2, SELPLG, ATP6V0E1, GMFG, IL17RA, IFNGR2, FAM107B, SPI1, IQGAP2, SIPA1L1, CYTIP, CDKN1A, GREB1, DGKG, SRGN, PLEC, GAB1, FCGR2A, LYZ, FUT8, UBL5, DYNLT1, TGFBR2, GABARAP, KIT, FCGR2B, CST3, TNFAIP8, SLC12A6, RAB38, TGFBR1, GSN, TXNIP, CERK, SH3KBP1, KCTD12, B2M, SH3BGRL3	Up-regulated
358	HASLINGER_B_CLL_WITH_11Q23_DELETION_up	0.00748431	0.0352652	0.554775	1.76718	30	21	DMXL2, PICALM, CTSK, ATM, PPP2R1B, CNR1, AHR, FUT8, GSN, SLC4A7	Up-regulated
360	UZONYI_RESPONSE_TO_LEUKOTRIENE_AND_THROMBIN_up	0.00458132	0.0242658	0.488441	1.76439	17	35	SIK1, EGR1, DUSP1, F3, NR4A2, ADAMTS1, GEM, CITED2, ELL2, ZFP36, RGS2, FOSL2, ARID5B, NR4A3, EGR3, MCL1, MAP3K8, RCAN1, PDK4	Up-regulated
361	LENAOUR_DENDRITIC_CELL_MATURATION_up	0.000589797	0.00540466	0.383807	1.76289	1	112	INHBA, FABP3, CD74, HLA-DPA1, C1QB, SEMA3C, DUSP1, HLA-DQA1, ABCG1, CD59, MAOA, PRKACB, SNRPN, ECM1, CITED2, CR1, TNFAIP6, IRF4, SCRN1, FABP4, HLA-DPB1, FCGR2A, ARF4, HLA-DQB1, ITGB5, CD83, APOC1, LIPA, A2M, SPP1, SLA, HSD11B1, QSOX1, NR4A3, SLC11A2, CAT, CCNG2, APOE, SOX4, IDO1	Up-regulated
363	HUANG_FOXA2_TARGETS_dn	0.00459653	0.0243176	0.484329	1.76054	17	36	SPARC, CLIC3, COL6A1, ATP2B4, PLAUR, CDKN1A, LEPR, ITGB4, GAS2L1, TNC, SPP1, CTSB, IGFBP6, CFI, STEAP3, SCEL	Up-regulated
364	ASGHARZADEH_NEUROBLASTOMA_POOR_SURVIVAL_dn	0.00384911	0.0212674	0.474783	1.76049	14	39	ADCY1, TADA2A, ST8SIA2, CNR1, ZNF710, FOXP1, SDK1, CAMTA1, GPR85, SCN3B, ST7, SOX4, WDR33, CHD3	Up-regulated
365	NEMETH_INFLAMMATORY_RESPONSE_LPS_up	0.000278164	0.00422266	0.402582	1.76047	0	85	IFI16, MSR1, SLC11A1, DAB2, JUND, C3AR1, ADAR, SLFN12L, IRGM, CASP4, GCH1, RHOC, MT1X, APBB1IP, STK10, DEGS1, CITED2, SLFN12, HCK, IER2, WSB1, CDKN1A, SRGN, NFKBIA, IL1RL1, HCLS1, SLC20A1, MYADM	Up-regulated
366	INGRAM_SHH_TARGETS_up	0.000596303	0.00544202	0.378161	1.7587	1	121	OLFML2B, DCN, APOD, OMD, CYP1B1, FBN1, MGP, NOG, AKAP12, DOCK5, IGFBP3, PLTP, DUSP1, PMP22, NR3C1, NID1, KLF9, FTL, IGFBP7, RAMP2, UBE2J1, PLPP3, ZFP36L1, LY6H, ASAH1, PENK, CLVS1, FILIP1L, SIN3A, IFI27L2, NFE2L2, CMPK2, FOXD1, SULT1A1, MAP3K1, SMOC2, ABCD4, EPHX1, FBN2, MR1, GLI1	Up-regulated
370	HUMMERICH_SKIN_CANCER_PROGRESSION_up	0.000278087	0.00422266	0.399246	1.75487	0	87	COL6A3, MMP14, COL1A2, VCAM1, ITGB1, MMP9, ITGA5, CPXM1, THBS2, SSPN, MAOA, COL1A1, RHOC, MT1X, IL17RA, APOC2, CDKN1A, STAT3, ITGB4, SLC26A4, RBMS1, SOD2, RGS2, TACSTD2, JUNB, FOS, DOK2	Up-regulated
371	PID_S1P_S1P3_PATHWAY_up	0.00549039	0.0279573	0.511783	1.75279	21	28	GNAI2, S1PR2, CXCR4, ITGAV, GNAO1, S1PR1, GNAI3, JAK2, MAPK1, GNA14, PDGFRB, GNA13, AKT1, GNA12	Up-regulated
372	EHLERS_ANEUPLOIDY_up	0.00485189	0.0253395	0.482152	1.75263	18	36	ALOX5AP, MBNL1, ID2, SCAF11, RWDD2B, TMEM47, FERMT2, RHOC, EXTL2	Up-regulated
373	SABATES_COLORECTAL_ADENOMA_dn	0.000378501	0.0043713	0.335957	1.75228	0	289	ASPN, FN1, PCDH7, SFRP1, CCDC80, MFAP5, ABI3BP, JAM2, EFEMP1, OGN, DPT, LRRK2, CLU, AKAP12, GPM6B, ANGPTL1, CPNE8, CDKN2B-AS1, ABCA8, TLR7, CFH, CNTN4, TUSC3, TMEM72, COL14A1, DUSP1, PTPRR, CMAHP, SIT1, RBM24, RAB3B, IL6R, RTN1, LMOD1, CDKL1, CD48, C7, KCNIP4, NDN, CHRDL1, DSEL, LYVE1, TNFRSF17, PGM5-AS1, VPREB3, MYH11, NAP1L3, DOCK10, TMEM200A, UNC5C, CDA, FLRT2, PNLIPRP2, MEIS1, FABP4, LPAR1, P…	Up-regulated
374	REACTOME_RHOU_GTPASE_CYCLE_up	0.00657728	0.0321405	0.487326	1.75125	25	34	SRGAP2, ARHGEF6, CDC42, IQGAP1, ARHGEF7, DST, GIT2, PAK3, RHOU, STAM2, HGS, CLTC, TXNL1, PIK3R1	Up-regulated
375	HUMMEL_BURKITTS_LYMPHOMA_dn	0.010429	0.0453273	0.607608	1.75106	43	15	CTSH, S100A11, MDFIC, FNBP1, BCL2A1, STAT3, NFKBIA	Up-regulated
376	KANG_IMMORTALIZED_BY_TERT_dn	0.00114058	0.00820373	0.389594	1.75062	3	98	ABCC9, OGN, FGFR1, NRP1, CXCR4, MMP9, ADAM20, ARHGEF6, HTR2B, PMP22, THBS2, MSX2, RGS12, PDE4D, KLF9, NTRK2, CNR1, PTGS1, NET1, MYH1, ADAM19, PDE10A, TNFAIP3, ZFPM2, ST3GAL1, GHR, CHST1, A2M, NR4A3, TFPI2, EGR3, PRELP	Up-regulated
377	REACTOME_SIGNALING_BY_BMP_up	0.00598952	0.0300794	0.510776	1.74934	23	28	BMPR1B, SMAD7, NOG, FSTL1, SMAD4, CHRDL1, UBE2D3, BMPR2, ZFYVE16, SKI, GREM2, BMP10, CER1, SMURF1	Up-regulated
378	INGRAM_SHH_TARGETS_dn	0.00106185	0.00787728	0.427202	1.74894	3	61	SFRP2, SFRP1, SDC1, C3, SPARC, VCAN, MME, CLU, NREP, GPM6B, COL1A1, CALCRL, LRRC17, BAMBI, BRPF1, AJUBA, PRDX4	Up-regulated
379	SIG_REGULATION_OF_THE_ACTIN_CYTOSKELETON_BY_RHO_GTPASES_up	0.00657728	0.0321405	0.486102	1.74686	25	34	ANGPTL2, GDI1, FLNA, CDC42, LIMK1, ACTR3, ROCK2, PFN2, PAK3, RHO, WASL, FLNC, CFL2, ACTG1, MYLK, AKT1	Up-regulated
381	FOSTER_TOLERANT_MACROPHAGE_up	0.000318674	0.00422266	0.360485	1.74545	0	160	LOX, MSR1, ID2, FABP3, SMAD7, IGSF6, DCBLD2, IRAK3, PLPP1, SLX4IP, RGS1, LMO4, THBS1, LRRC8C, RGL1, MS4A6A, CD200, GEM, PPP3CC, NAIP, SLC7A8, ADHFE1, TRAF3, BST1, RASGRP1, PLPP3, ZFAND3, BST2, FGL2, FPR2, SLFN12, RIOK3, GOSR1, RAB32, ZDHHC18, LY6H, RNF149, SLC31A2, ELL2, RHO, SGK1, HLA-E, MCOLN2, CLMP, MS4A4A	Up-regulated
382	PEDERSEN_TARGETS_OF_611CTF_ISOFORM_OF_ERBB2_up	0.00109619	0.00798704	0.415739	1.7438	3	70	PHLDB2, ITGB1, ITGA5, CD59, TMEM156, RAB3B, WWTR1, ITGB6, HSPB8, IDS, PLAUR, HOMER3, ADAM9, BCL2A1, PLOD2, EDEM1, ZNF185, NT5E, ACTN1, RGS2, HK2, TNFAIP8, SLC12A6, B3GNT5, SLC4A7, S100A2, ENTPD3, PTGES, TFPI, ST20-AS1	Up-regulated
388	RAGHAVACHARI_PLATELET_SPECIFIC_GENES_up	0.00107066	0.00789932	0.421198	1.73983	3	64	RAB31, SPARC, RGS10, PIP4K2A, THBS1, GNG11, PPM1A, CTSA, MPP1, PTGS1, TPM1, ZNF185, ASAH1, TNFSF4, TAX1BP3, ITGB5, RNF11, VCL, APP	Up-regulated
389	BLANCO_MELO_RESPIRATORY_SYNCYTIAL_VIRUS_INFECTION_A594_CELLS_up	0.000370508	0.0043445	0.33458	1.73979	0	280	IFI16, GFPT2, GBP3, CHST11, SAMD9, ENTPD7, C3, SP110, TMEM154, EGR1, C1S, IL20RB, FSTL1, GLIPR1, MMP9, CD68, NID2, ITGA5, FBXO32, F3, CRISPLD2, LMO2, DCLK1, SELPLG, EMP1, LCP1, POU2F2, HSPB8, DSEL, SPOCK1, PLAUR, HAS3, COL17A1, ARG2, STX11, SAMHD1, BST2, C6orf58, BCL2A1, PLOD2, CXCL11, IL7R, OSMR, MCTP1, IFIT1, NT5E, ADAM19, IFIH1, HERC5, SLFN5, MX1, UBE2L6, TRANK1, LAMP3, TNFAIP3, CD55, SERPING1…	Up-regulated
390	PLASARI_TGFB1_SIGNALING_VIA_NFIC_10HR_up	0.00211138	0.0131954	0.432828	1.73735	7	56	C1S, SEMA3C, SPARCL1, VCAM1, NREP, GPM6B, RGS4, CPXM1, F3, ANO1, PCSK5, MYH11, UNC5C, FGF7, OLR1, GVINP1, MPZL2	Up-regulated
392	BROWNE_HCMV_INFECTION_10HR_dn	0.00212089	0.013218	0.439012	1.73731	7	53	FRY, RUNX1, ETV1, CBLB, NR3C1, ZSCAN26, EMP1, KLF9, AHR, STAMBP, ARHGAP29, NT5E, TCF7L2, OGG1, RBMS1, NIPBL	Up-regulated
394	JAATINEN_HEMATOPOIETIC_STEM_CELL_dn	0.000340483	0.00422266	0.341936	1.73566	0	224	QPCT, CYP1B1, IGSF6, VCAN, CD28, PIK3R5, MAN1C1, GABARAPL1, RGS1, ARL4C, CD163, MMP9, THBS1, CALD1, RGCC, MNDA, S100A12, S100A9, CRISPLD2, MS4A6A, CTSH, PCSK5, LEF1, RTN1, NID1, CSTA, FCGR3B, CITED2, PTGDR, SLC2A3, RASGRP1, C5AR1, NEXN, STX11, SAMHD1, FGL2, SULF2, ZFP36L1, HCK, GPR65, PSAP, MMP8, CCR1, IL7R, CYBB, GNLY, FCGR2A, OLIG1, SLFN5, GZMH, LYZ, TNFAIP3, GZMK, IL10RA, S1PR5, SGK1, CLEC7A, …	Up-regulated
395	JECHLINGER_EPITHELIAL_TO_MESENCHYMAL_TRANSITION_dn	0.00106185	0.00787728	0.423882	1.73535	3	61	TGFB3, ID2, EGR1, ZNF239, NRP1, DUSP1, THBS1, F3, CTSH, CYP2F1, PC, FLNA, KITLG, NUMB, PLK2, ZFP36, ITGB5, SGK1, ITPR1, MYH9, FOS	Up-regulated
396	KATSANOU_ELAVL1_TARGETS_up	0.000645995	0.00577785	0.356194	1.73455	1	167	OLFML2B, EMCN, PALMD, LAPTM5, C1QB, STOM, LDB2, COL11A1, C3AR1, SFI1, TRIM5, PDE5A, ATP10D, SLFN12L, POPDC2, IRGM, CTSH, ADGRF5, CD200, PLEKHA2, SLC16A4, MMP2, ZNF429, ENG, MYH11, C21orf62, PRSS35, HOXA5, FBXL7, C1QC, ALDH1A1, PLOD2, CYBB, FZD6, KCNMB1, LYZ, CXCL12, SERPING1, SPSB1, HMCN1, HOXB6, CCL25, ALX1, TNNC1, PTP4A3, IER3IP1, TXNIP, PLEKHH2, DGKK, FOXD1	Up-regulated
397	GARGALOVIC_RESPONSE_TO_OXIDIZED_PHOSPHOLIPIDS_GREY_up	0.0114449	0.048565	0.570179	1.73386	47	18	TFEC, ZSCAN31, ADAMTS1, SOS1, KIAA1522, WHAMMP3, ARRDC4, FNIP1, LBH, CREBRF	Up-regulated
398	ROSS_AML_WITH_CBFB_MYH11_FUSION_up	0.00238158	0.0145196	0.4411	1.73294	8	51	QPCT, SPARC, MEF2A, PTPRM, NRP1, ST18, S100A9, AK5, MYH11, MDFIC, CFP, LPAR1, CYBB, DYNLT1, IL10RA, CLEC7A, PLXNB2, KCTD12	Up-regulated
399	MCBRYAN_PUBERTAL_TGFB1_TARGETS_up	0.000647459	0.00577941	0.357107	1.73247	1	164	FN1, MMP14, RUNX1, BASP1, PTPN14, ACTA2, FABP3, VCAN, PICALM, TAGLN, CLU, QKI, CALD1, F3, CNN3, ITGAV, NRIP1, DPYSL3, PRKACB, HTRA1, MMP2, SOCS2, ECM1, DKK3, SMARCA1, LASP1, TNFAIP6, PIAS3, CDKN1A, HSPG2, PLOD2, ACADVL, FOXP1, NET1, FZD6, CITED1, UTRN, GJA1, TNC, CYB5R3, COL8A1, HDLBP, HAS2, TGFBR1, MAL, GSN	Up-regulated
403	PID_MYC_REPRESS_PATHWAY_up	0.00107152	0.00789932	0.421298	1.72812	3	62	LGALS1, SFRP1, ID2, DNMT3A, COL1A2, SLC11A1, SMAD2, CLU, ITGB1, SMAD4, SMAD3, FTH1, SPI1, ZFP36L1, CDKN1A, ITGB4, NFYA, NFYB	Up-regulated
404	ELVIDGE_HIF1A_AND_HIF2A_TARGETS_dn	0.0011458	0.00821495	0.383005	1.72802	3	100	LOX, LOXL1, BNIP3L, EGR1, CSRP2, DPYSL4, AKAP12, TMEM45A, IGFBP3, IGFBP5, CXCR4, SERPINE1, PLIN2, VEGFC, CITED2, SPOCK1, BNIP3, PLAUR, PAM, SH3GL3, DST, WSB1, VLDLR, RBPJ, ATXN1, AHNAK2, ITPR1, GJA1, HK2, FOS, PDK1, HLA-DRB1, QSOX1	Up-regulated
407	WINTER_HYPOXIA_METAGENE_up	0.00035137	0.00424567	0.338242	1.72512	0	236	LOX, TGFB3, FN1, LGALS1, ID2, BNIP3L, BHLHE41, ANGPT2, ERRFI1, EGR1, CLK1, HIF1A, IGFBP3, SLC6A10P, IGFBP5, CXCR4, SERPINE1, THBS1, CALD1, ITGA5, THBS2, F3, NR3C1, PLIN2, VEGFC, MMP2, PKM, LRP1, ANXA5, CITED2, FTL, MAP4, VEGFB, COL5A1, ANXA1, SLC2A3, BNIP3, ENG, PLAUR, MPI, MT1L, PTGS1, RIOK3, CDKN1A, ALDH1A1, PLOD2, CD99, FKBP4, TPBG, PIM1, NT5E, VPS11, RBPJ, ELL2, TNFAIP3, SLC20A1, ICAM1, HLA-D…	Up-regulated
408	AMIT_SERUM_RESPONSE_60_MCF10A_up	0.00211138	0.0131954	0.429719	1.72487	7	56	FN1, CYBRD1, INHBA, PIP5K1A, EGR1, VGLL3, PNRC1, PDLIM5, KLF7, CALD1, NR4A2, IER2, ELL2, PLK2, TNFAIP3, SGK1, SLC35D1, TNC, GAS1, EGR3, SOX4, MAFB, MAP3K8, COBLL1, RCAN1	Up-regulated
409	HENDRICKS_SMARCA4_TARGETS_up	0.0026462	0.0158313	0.438151	1.72136	9	51	LGALS1, THY1, EMP3, DCBLD2, ARL4C, ATP2B4, ITGA5, AGT, CTSH, PTPN7, FLNB, MT1L, CDKN1A, TPM1, SMARCA2, FOSL2, PLXNB2, CTSB, SERPINE2, S100A2	Up-regulated
410	ZHENG_FOXP3_TARGETS_IN_T_LYMPHOCYTE_dn	0.00561654	0.0284987	0.469906	1.72119	21	37	PTPRC, WNK1, LPAR6, CMAHP, CPE, BACH2, LEF1, NRIP1, STK10, FOXP1, TGFBR2, UTRN, NIPBL, MS4A4A, JAK1, SCML4	Up-regulated
412	REACTOME_INTERFERON_GAMMA_SIGNALING_up	0.000839631	0.00673056	0.3889	1.71897	2	90	GBP3, PIAS1, HLA-DPA1, HLA-DRA, VCAM1, MT2A, TRIM5, HLA-DQA1, TRIM26, IFNG, HLA-H, IFNGR2, JAK2, IRF4, IRF5, CAMK2A, PTPN6, HLA-DPB1, TRIM21, FCGR1B, TRIM48, TRIM35, CAMK2D, ICAM1, HLA-DQB1, HLA-E, GBP2, JAK1, HLA-DRB1, B2M, GBP4	Up-regulated
413	DAVICIONI_MOLECULAR_ARMS_VS_ERMS_dn	0.000983607	0.00759921	0.350173	1.71731	2	176	GLT8D2, LAMA2, MFAP2, PDGFRL, EMP3, EFEMP2, SDC1, PSD3, RGS10, GULP1, SLC43A3, SCARA3, PTPN13, TMEM45A, CD248, ZFHX4, FNDC3B, PMP22, RGL1, P3H4, MMP2, ASAP3, MAGEL2, FAT4, CRTAP, PLPP3, BST2, IER2, EMILIN1, LPAR1, TPBG, RAB32, DUSP4, CITED1, PLK2, RBMS3, TSPAN9, INPP4B, WLS, PVALB, HOXC10, PTP4A3, CCND1, KCTD12, TRPS1, CPM, TSKU, WNT11, PRR16, FBN2, REEP4, GNB3, FAM160B2, ITM2A, DLC1, MGAT1, TP63…	Up-regulated
421	WP_DEVELOPMENT_OF_URETERIC_COLLECTION_SYSTEM_up	0.00340136	0.0192443	0.440653	1.70651	12	47	ANOS1, ITGB1, TGFB2, GLI3, ROBO1, RARA, FAT4, ROBO2, GLI2, ITGA8, GDNF, LHX1, CCND1, SMO, FOXC1, FGFR2, ILK, WNT11, GLI1, SIX1	Up-regulated
422	BONOME_OVARIAN_CANCER_POOR_SURVIVAL_up	0.00745712	0.0352111	0.484046	1.70497	29	31	PSD3, EFEMP1, RB1CC1, GULP1, IGFBP5, ITM2B, TTC37, FAT4, LEPR, ZBTB16, SRSF11, EID1, CERK, SIRT1, RUNX1T1	Up-regulated
424	WANG_ESOPHAGUS_CANCER_VS_NORMAL_up	0.000884173	0.00698762	0.367193	1.70266	2	118	COL6A3, FN1, LUM, THY1, GBP3, COL3A1, SPARC, LAPTM5, C1S, C1R, IGFBP3, MMP9, UCP2, SERPINE1, PIGT, CTSH, P3H4, SLC16A4, AQP9, ANXA5, IGFBP7, LASP1, PMEPA1, C4A, FKBP6, SRGN, FMOD, TCF7L2, TNFAIP3, SERPING1, PECAM1, MYADM	Up-regulated
428	SARRIO_EPITHELIAL_MESENCHYMAL_TRANSITION_dn	0.000923645	0.00726115	0.357896	1.69945	2	139	IFI16, CYBRD1, BNIP3L, ERRFI1, EGR1, MME, STOM, C1S, CLU, LPAR6, PNRC1, SEMA3C, CALD1, RGCC, FBXO32, ROS1, MAOA, PC, GEM, CITED2, ENG, DST, RSRP1, PSAP, CAPZB, ACTA1, STAT3, DSC3, ZBTB16, NFKBIA, MVP, TNFAIP3, RGS2, GBP2, FOSL2, NFE2L2, TACSTD2, FOS, GAGE12F, GAS1, IFITM2, CCL3	Up-regulated
429	FAELT_B_CLL_WITH_VH_REARRANGEMENTS_up	0.003663	0.0204407	0.438817	1.69939	13	47	RAB31, RUNX1, EMP3, DENND4B, NPC2, ZBTB20, RHOC, JAK2, SCRN1, FGL2, RAB6A, GABBR1, DGKG, NPTN, TBL1X, CLIC4, CTDSP2, EGR3	Up-regulated
431	PLASARI_TGFB1_TARGETS_10HR_dn	0.00070373	0.00619531	0.331176	1.69666	1	245	PRRX1, PDGFRA, LUM, PCDH7, HACD4, PALMD, CYP1B1, EVI2A, BNIP3L, ANGPT2, CYP7B1, OGN, DAB2, GULP1, DZIP1, LDB2, SHOX2, SCARA3, VCAM1, C3AR1, RAB30, MEIS2, FMNL2, IGFBP5, ADGRG2, ARHGAP28, ZFHX4, ZNF521, PDE5A, PMP22, ADAMTS1, DCLK1, ARRDC3, SLC16A4, PDE1A, SH3BGRL, MED12L, ADHFE1, FAT4, EIF2AK2, PLPP3, PRSS35, UNC5C, NR1D2, FGF7, METTL7A, TLE6, KITLG, FBXL7, PLEK, KCND2, IL6ST, CELF2, TRIM21, MPPE…	Up-regulated
434	KIM_WT1_TARGETS_up	0.000344234	0.00422266	0.337079	1.69417	0	214	PDGFRA, SNAI2, PCDH7, GFPT2, INHBA, ZEB1, DNAJB5, EGR1, AKAP12, PDLIM5, SRF, GLIPR1, UCP2, SERPINE1, RGS4, THBS1, CALD1, F3, NR3C1, FERMT2, LEF1, SMAD3, WWTR1, RARA, GEM, KLF9, IFNGR2, TRAF3, TNS3, TRIO, PLAUR, MTMR1, ZFP36L1, IER2, ZYX, SF1, LPAR1, TPBG, ARHGAP29, MYO1E, HNRNPL, NFKBIA, ACTB, NFATC1, PDE10A, TNFAIP3, BMPR2, SLC20A1, CD83, ACTN1, SGK1, ST3GAL1, FOSL2, CAPRIN2, FLNC, JUNB, ARID5B,…	Up-regulated
436	CAIRO_LIVER_DEVELOPMENT_up	0.000959079	0.00747415	0.349174	1.69349	2	162	PDGFRA, MFAP2, LXN, EMCN, PLS3, BASP1, ARPP19, CDK14, ADGRL2, FGFR1, CSRP2, LDB2, CD248, IGFBP5, TRO, TGFB2, MORF4L1, TMEM47, GOLT1B, PKM, NDN, HBE1, SMARCA1, MDK, SH3GL3, MSANTD3-TMEFF1, PLOD2, ITGA8, RWDD1, FGF13, CTPS1, PFN2, PLK2, SMARCA2, LPAR4, CYSLTR1, WLS, GJA1, HBZ, PDPN, GAS1, EVL, UTP3, SPATS2, SLC25A4, PDZD2, SERPINE2, TRPS1, TBX3, PCOLCE2, CPM, RBM34, TTC3, KLHL22	Up-regulated
437	KAAB_HEART_ATRIUM_VS_VENTRICLE_up	0.000353732	0.00424567	0.329342	1.69302	0	251	EDNRA, NR2F2, SFRP1, BASP1, CDK14, TRPC1, ACTA2, ID2, SMAD7, EFEMP1, VCAN, SLIT3, ARHGAP1, DPT, TAGLN, ZNF271P, C1R, CFH, ATM, PTGIS, CPE, CREB3L2, AEBP1, DPYSL3, GNAO1, CHRDL1, NTRK2, SPOCK1, MYH11, PAM, FAM114A1, MDK, ZNF208, ROR2, FGL2, PRUNE2, FLRT2, VAMP5, HSPG2, MYL6, CSRP1, BAMBI, FMOD, CITED1, IL1RL1, CD63, STAT4, SYNPO, ACTN1, CYB561D2, AUTS2, SURF2, CDO1, VIM, AKR1C1, RTN4, MAL, GAS1, P…	Up-regulated
438	BERTUCCI_INVASIVE_CARCINOMA_DUCTAL_VS_LOBULAR_dn	0.00517866	0.026551	0.443755	1.69256	19	44	EMCN, SFRP1, OMD, DPT, SPARCL1, POU2F2, RBP4, FABP4, ALDH1A1, PECAM1, TGFBR2, TXNIP, TNXB, CD34	Up-regulated
443	HINATA_NFKB_TARGETS_KERATINOCYTE_up	0.00138889	0.00961918	0.386949	1.68832	4	84	FN1, MMP14, PNRC1, GABARAPL1, ARHGDIB, MMP9, SERPINE1, ESM1, ITGB6, TNFAIP6, BCL2A1, CDKN1A, CXCL11, IL7R, NFKBIA, TNFAIP3, ICAM1, SOD2, CD83, TNC, TNFAIP8, VIM	Up-regulated
444	KEGG_CELL_ADHESION_MOLECULES_CAMS_up	0.000912686	0.00718761	0.360669	1.68731	2	127	JAM2, SDC1, HLA-DPA1, VCAN, CD58, CD28, PTPRC, PTPRM, HLA-DOA, HLA-DRA, VCAM1, ITGB1, HLA-DQA1, SELPLG, ALCAM, ITGAV, HLA-DMB, SDC2, CNTNAP2, CADM3, HLA-DPB1, CD99, ITGA8, CLDN16, PECAM1, ICAM1, CADM1, HLA-DQB1, CDH5, HLA-E, SIGLEC1, CD22, CLDN11, HLA-DOB, HLA-DRB1, CNTNAP1	Up-regulated
448	VERHAAK_AML_WITH_NPM1_MUTATED_up	0.000963391	0.00749471	0.344045	1.68221	2	170	DMXL2, RUNX1, BASP1, PLA2G4A, CYP1B1, PIEZO2, VCAN, CHST15, C1QB, CLU, C3AR1, CD163, HK3, THBS1, FTO, GCH1, TLR4, MMP2, FCGR3B, AQP9, PLAUR, C5AR1, FCGR3A, HOMER3, HOXA5, FGL2, MEIS1, HCK, BCL2A1, PLEK, CCR1, PILRA, NFKBIA, MVP, MCTP1, NCF1, ADGRE1, FCGR2A, LTBP1, TNFAIP3, HOXB6, GNS, KCNK5, SOD2	Up-regulated
449	SCHAEFFER_SOX9_TARGETS_IN_PROSTATE_DEVELOPMENT_dn	0.00495179	0.0256817	0.438382	1.68103	18	45	SFRP1, BASP1, FBLN5, INHBA, TCF4, NAV1, CRMP1, ZNF521, RASSF2, MEIS1, CDK2, DDX6, ELAVL4, NUDT3, RRM2, RBFOX2, SOX4	Up-regulated
451	WP_COPPER_HOMEOSTASIS_up	0.00371156	0.0206602	0.424663	1.68052	13	53	COMMD1, MT2A, BACE1, GSK3B, MT1X, MTF1, STEAP4, MT1L, ADAM9, CCS, SLC31A2, CCND1, APP, SLC11A2, STEAP3, PRNP, MT1JP, MT1G, FOXO1, COX17, AKT1, ADAM17	Up-regulated
453	GAVIN_FOXP3_TARGETS_CLUSTER_P7_up	0.00168681	0.011132	0.381121	1.67983	5	89	QPCT, EVI2A, TLR7, RGCC, HECTD2, EMP1, SOCS2, ECM1, ANXA1, MSRA, DST, IFT80, USP27X, MYO1E, NT5E, BMPR2, GZMK, ADAMTS6, ACTN1, WLS, GBP2, FOS, MTMR3, APP, PRNP, TMSB10, PARD6G, HS3ST3B1, KLRD1	Up-regulated
454	CHEBOTAEV_GR_TARGETS_dn	0.0014806	0.0101137	0.362119	1.67959	4	119	LOXL1, PTPN14, PLA2G4A, EFEMP2, COL1A2, MME, PHLDB2, ANKRD6, IGFBP3, GPM6B, IGFBP5, PKIA, TGFB2, PRKD1, THBS2, CRISPLD2, CPE, SYNE1, SMARCA1, PPP2R3A, NEXN, IRF4, ZFP36L1, FLRT2, RASA3, MYL9, PPP1R3C, PFN2, CXCL12, RTN2, GDNF, GUCA2A, PALLD	Up-regulated
456	BOYLAN_MULTIPLE_MYELOMA_C_D_dn	0.000362713	0.00428844	0.323774	1.67792	0	268	IFI16, TSPAN2, BASP1, ID2, ABI3BP, C3, IGSF6, TFEC, TMEM154, PRLR, B3GALNT1, CD28, GPR183, VCAM1, ANOS1, SEC24D, ARL4C, GDA, MMP9, TRIM5, RGCC, FNDC3B, EAF2, PRDM1, S100A9, CPE, CASP4, ZBTB20, ALCAM, CSTA, MAF, STEAP4, TNFRSF17, LAX1, TNS3, MDFIC, IQGAP2, SPON1, FGL2, KDELR3, SLFN12, SCART1, CFP, MMP8, PLEK, SH2D1A, EDEM1, ZBTB16, RAB32, RAPH1, LY6H, HDC, LYZ, ELL2, GVINP1, LPAR4, PAFAH2, ITGB5, …	Up-regulated
458	PHONG_TNF_RESPONSE_NOT_VIA_P38_up	0.00039968	0.00449763	0.316669	1.67741	0	330	NR2F2, GFPT2, NRP2, ID2, ETV1, DSE, BHLHE41, VCAN, CD58, HIVEP2, COL6A1, JUND, PDLIM5, VCAM1, PLXNA1, MEIS2, MMP9, ZFHX4, KLF7, SERPINE1, CALD1, ZNF432, ROBO1, TMEM156, SLC30A1, GCH1, ATF5, SMAD3, CDC42EP3, EMP1, UVRAG, MMP2, GEM, C2CD2, STK10, COL6A2, HSPB8, FLOT1, TRAF3, CYLD, TRIO, PLAUR, FNBP1, PLPP3, ADARB1, PANX1, IFNAR2, IER2, BCL2A1, SRGN, FKBP4, TNFRSF10B, IL6ST, BAMBI, NET1, TRIM21, NFK…	Up-regulated
460	BLANCO_MELO_COVID19_SARS_COV_2_INFECTION_CALU3_CELLS_up	0.0003885	0.00441845	0.316848	1.67501	0	322	LAMA2, IFI16, INHBA, CYP1B1, SAMD9, FAP, MB21D2, SLC16A6, SP110, HDX, HIVEP2, EGR1, PHLDB2, C1R, AKAP12, VCAM1, BCAT1, MT2A, NEURL3, NLRP1, GBP1P1, TRIM5, SERPINE1, CNTN4, DUSP1, THBS1, MAST4, PRDM1, LMO2, BACH2, ARRDC3, ZBTB20, KLF9, ZEB2, RASGRP1, EIF2AK2, HMGN2P46, STX11, SAMHD1, BST2, C6orf58, BCL2A1, SLC5A5, CXCL11, TRIM21, IL23A, NFKBIA, IFIT1, IFIH1, HERC5, SLFN5, MX1, UBE2L6, TRANK1, LAMP…	Up-regulated
461	DELYS_THYROID_CANCER_dn	0.000691802	0.00612641	0.329325	1.67499	1	230	COPZ2, LAMA2, DCN, EMCN, CYBRD1, APOD, SFRP1, FBLN5, MGP, OGN, EGR1, DPT, CSRP2, LDB2, AKAP12, CPQ, MEIS2, FMO2, GNG11, LMO2, CRYAB, EML1, RERGL, SYNE1, PRKACB, MT1X, SDC2, ELMO1, CITED2, CHRDL1, RYR2, PCLO, IQGAP2, MT1L, ROR2, FGL2, FLRT2, IER2, ALDH1A1, LPAR1, FGF13, EYA2, MPPED2, HSPA12A, FMOD, PLA2G7, IPCEF1, HBG2, CLMN, PDE10A, CXCL12, SLC26A4, ZFPM2, ITPR1, KIT, DLG2, GHR, GNA14, TNFAIP8, F…	Up-regulated
465	TAKEDA_TARGETS_OF_NUP98_HOXA9_FUSION_6HR_dn	0.00648172	0.0319171	0.439963	1.66715	24	43	INHBA, PTPRC, SERPINE1, RGCC, NR4A2, TNFSF8, IL6R, HTRA3, CD200, RARA, GAS7, HIP1R, CCR1, AQP1, CLMN, ZFP36	Up-regulated
466	ZWANG_CLASS_3_TRANSIENTLY_INDUCED_BY_EGF_up	0.000344234	0.00422266	0.331229	1.66595	0	215	FRMD6, RUNX1, SMAD7, PSD3, HIVEP2, SIK1, CAMSAP1, VGLL3, PHLDB2, SEMA3C, IRF2BPL, SERPINE1, JOSD1, DUSP1, AFF1, FERMT2, NR4A2, VTRNA1-3, DUSP14, EMP1, WWC1, GEM, MTF1, STEAP4, BLZF1, RIMKLB, PLAUR, PPP1R14C, PLPP3, STX11, PANX1, ZFP36L1, CHMP1B, ADGRF4, SLC20A2, OLR1, RGS21, ELL2, PLK2, IFNE, TNFAIP3, ATXN1, RASA2, CD55, RBMS1, SLC20A1, MYADM, UGCG, SH3BP4, RGS2, KRT12, FOSL2, TACSTD2, JUNB, CPEB…	Up-regulated
468	FLECHNER_PBL_KIDNEY_TRANSPLANT_OK_VS_DONOR_dn	0.00951646	0.0423468	0.449154	1.6554	36	38	LY96, CD53, CDC42EP3, RAB11A, ANXA5, SLC2A3, AHR, DDX5, ITSN2, NFYA, EID1, HAUS2, IL1B, TRAF3IP2, ANP32E	Up-regulated
469	BLANCO_MELO_BETA_INTERFERON_TREATED_BRONCHIAL_EPITHELIAL_CELLS_up	0.00040783	0.00453829	0.309253	1.65482	0	358	EDNRA, SCG5, IFI16, APOD, GBP3, INHBA, SAMD9, C3, SEC24A, SKIL, ANKRD12, SP110, C1S, C1R, QKI, IGFBP3, ADAR, TRIM5, DUSP1, THBS1, ESM1, TMEM47, LMO2, ADAMTS1, TOR1AIP1, VEGFC, SLC16A4, DDX3X, NCALD, LCP1, FAM126B, BLZF1, PLAUR, RAB8B, EIF2AK2, IL13RA2, SAMHD1, MALT1, PANX1, BCL2A1, STARD5, ROCK2, FST, LEPR, IL7R, CLDN16, ARHGAP29, DUSP4, IL6ST, TRIM21, IL23A, RAPH1, OSMR, MCTP1, IFIT1, NT5E, IFIH…	Up-regulated
471	KEGG_ADHERENS_JUNCTION_up	0.00269251	0.0160228	0.396877	1.65274	9	67	SNAI2, FGFR1, SMAD2, PTPRM, CREBBP, SMAD4, LEF1, SMAD3, CDC42, IQGAP1, PTPN6, ACTB, MAPK1, TCF7L2, TGFBR2, ACTN1, WASL, WASF2, TGFBR1, VCL, ACTG1, CTNNA2, WAS, PTPRJ	Up-regulated
472	REACTOME_INTERLEUKIN_4_AND_INTERLEUKIN_13_SIGNALING_up	0.00147319	0.0100829	0.360793	1.65087	4	110	IGHG4, FN1, TIMP1, ZEB1, COL1A2, HIF1A, VCAM1, ITGB1, MMP9, IL6R, MAOA, MMP2, NDN, S1PR1, ANXA1, SOCS5, JAK2, IL13RA2, IRF4, CDKN1A, STAT3, ITGAX, PIM1, IL23A, ICAM1, RHOU, JUNB, JAK1, FOS, VIM, IL1A, CCND1, FGF2	Up-regulated
473	MIKKELSEN_MEF_LCP_WITH_H3K4ME3_up	0.00149076	0.0101676	0.354687	1.64953	4	121	ASPN, LUM, POSTN, HACD4, EMP3, INHBA, COL3A1, ZFAND6, OGN, COL6A1, SERPINF1, ARHGDIB, ANGPTL2, SLFN12L, MAB21L3, CASP4, TLR4, TEF, ECM1, PINLYP, RAB43, ANXA1, EMILIN1, TRIM21, LDB3, TNFRSF14, ECM2, GBP2, PDGFRB, FBXW10, GLMP, SH3KBP1, IFIT1B, TNS2, ZNF583, C1QTNF6, C6orf118, MR1, SARDH, CPA6, GAL3ST4, PHYHD1, CP, RUFY4	Up-regulated
475	WP_TGFBETA_SIGNALING_PATHWAY_up	0.00122549	0.00872367	0.350099	1.64686	3	132	FN1, SMAD7, ZEB1, PIAS1, COL1A2, MEF2A, SKIL, SIK1, DAB2, JUND, SMAD2, ITGB1, CREBBP, THBS1, SMAD4, SMAD3, PPM1A, ZEB2, CDC42, SOS1, ATF2, CDKN1A, TRAF6, KLF11, ITGB4, CITED1, MAPK1, ZFYVE16, TGFBR2, SKP1, SKI, RUNX2, SIN3A, TNC, PIAS2, JUNB, FOS, PDK1, TGFBR1, HGS, CCND1, APP, RNF111, PIK3R1, SMURF1, PML, FOSB	Up-regulated
477	HOELZEL_NF1_TARGETS_up	0.00153186	0.010369	0.348385	1.6388	4	132	RAB31, IFI16, PCDH7, PLS3, NAV1, DCBLD2, STXBP5, SPARCL1, PDLIM5, ADGRG2, H19, SERPINE1, HS2ST1, RBM24, DCLK1, TRNP1, NRIP1, LIMS1, THSD4, HSPB8, HBE1, FAM114A1, IGSF1, DUSP4, KISS1R, PLK2, ATXN1, PAG1, AHNAK2, SPATS2L, SCN9A, SLC27A6, DGKK, RAB3C, STEAP3, EEF1A2, S100A2, HS3ST3B1, NRCAM, TRAF3IP2, MOSPD1, EPS8, KCNH8, PHACTR2	Up-regulated
482	BURTON_ADIPOGENESIS_2_up	0.00276778	0.0164053	0.388872	1.63279	9	71	LXN, TIMP1, SDC1, BCAT1, KCNN4, ITGA5, SAR1B, SLC7A6, SAMHD1, LIMK1, RASA3, FST, RHOJ, SIDT2, IVNS1ABP, UGDH, IL1RL1, TPM4, SPSB1, ST3GAL1, RHOU, GJA1, CLIC4, SASH1, TEAD4, GNPTAB, COL4A1, MCL1	Up-regulated
484	CHIARADONNA_NEOPLASTIC_TRANSFORMATION_KRAS_dn	0.00123419	0.00875062	0.345071	1.62992	3	135	COPZ2, CCDC80, MFAP5, COL1A2, FBN1, SEMA3C, AKAP12, TMEM45A, FSTL1, PLTP, DUSP1, PMP22, CDKL2, COL1A1, STK10, RBMS2, CITED2, COL5A1, CRTAP, LASP1, SAMHD1, RNPEPL1, VAMP5, ALDH1A1, FOXP1, IL6ST, SEC14L1, EBF3, LY6H, ASAH1, AQP1, ITGB5, MSLN, FOS, TMEM159, GAS1, GSN, APP, TIMP3, CTDSP2, TP53INP2, TNXB, CHFR	Up-regulated
485	SHEDDEN_LUNG_CANCER_GOOD_SURVIVAL_A4_up	0.000999334	0.00769418	0.327785	1.62925	2	193	CHTOP, APOD, PLS3, AASS, LMO3, EFEMP1, WNK1, QKI, SEC24D, ATP2B4, DUSP1, DLEC1, NR3C1, CDKL2, IL6R, INPPL1, CDC42BPA, ADGRF5, MAOA, SYNE1, SLC16A4, RHOBTB2, GEM, CITED2, STEAP4, HSPB8, FTH1, PPP2R3A, ZFAND5, SCRN1, TLE2, PIAS3, WSB1, VAMP5, CHAT, EDEM1, ZBTB16, CEP112, AK1, NFKBIA, FGF4	Up-regulated
488	WP_FOCAL_ADHESIONPI3KAKTMTORSIGNALING_PATHWAY_up	0.000381971	0.00438875	0.3091	1.62145	0	302	FN1, LAMA2, PDGFRA, IKBKG, COL3A1, COL1A2, ANGPT2, PPP2R2C, FGFR1, PRLR, HIF1A, PIK3R5, LAMB1, LPAR6, RPS6KB2, ITGA11, COL11A1, ITGB1, THBS1, GNG11, ITGA5, IKBKB, GSK3B, THBS2, CREB3L2, IL6R, PPP2R1B, ITGAV, COL1A1, VEGFC, TCL1B, ITGB6, GNB1, COL6A2, VEGFB, COL5A1, PPP2R5A, SLC2A3, PPP2R3A, GNG10, JAK2, FGF7, SOS1, ATF2, IFNAR2, KITLG, CDKN1A, LPAR1, IL7R, PPP2CA, ITGA8, IFNAR1, ITGAX, FGF13, ITG…	Up-regulated
489	DEURIG_T_CELL_PROLYMPHOCYTIC_LEUKEMIA_dn	0.000384172	0.00439828	0.309023	1.62096	0	304	RDX, TRPC1, ID2, ENTPD4, SGCB, HLA-DPA1, CD58, SLC16A6, ANKRD12, CD28, PTPRC, PLPP1, KLHL2, PTPRM, LPAR6, MT2A, CLEC2B, SFI1, NLRP1, TAB2, GNG11, CTR9, ATM, PRDM1, CASP4, CD59, TOR1AIP1, GCH1, CD84, ALCAM, SYNE1, SNRPN, GTF2B, CD48, MT1X, IFNG, MAF, DEGS1, PPP3CC, PJA2, IDS, CYLD, NAP1L3, PAM, TUG1, GNAI3, CDC42, MALT1, GPR65, HIP1R, HLA-DPB1, SRGN, STAT3, CRTAM, GIT2, GNLY, P2RY10, GZMH, SS18L2,…	Up-regulated
490	IKEDA_MIR1_TARGETS_up	0.00612517	0.0304725	0.408011	1.62015	22	54	PICALM, ACVR1, FNDC3B, PMP22, CNN3, SF3B1, ARRDC3, PRKACB, DDX3X, CITED2, PDCD4, ATP6V1A, TBC1D15, SEC62, PLK2, ARF4, KAT6B, ARHGAP21, CLTC, ARCN1, ANP32E, EDN1, SEC63	Up-regulated
491	KEGG_REGULATION_OF_ACTIN_CYTOSKELETON_up	0.00103057	0.00778752	0.322719	1.61832	2	210	FN1, PDGFRA, RDX, PIP5K1A, FGFR1, PIP4K2A, PIK3R5, ITGA11, ITGB1, ARHGEF6, ITGA5, NCKAP1, SSH1, ITGAV, TIAM2, ITGB6, VAV1, CDC42, IQGAP2, IQGAP1, ARPC3, ARHGEF7, FGF7, LIMK1, SOS1, MRAS, ROCK2, PPP1CB, ITGA8, ITGAX, FGF13, ITGB4, ACTB, FGF4, MOS, MYL9, PFN2, MAPK1, FGF12, PAK3, ITGB5, ACTN1, WASL, MYH9, PIP5K1C, WASF2, CFL2, PDGFRB, FGF10, GSN, VCL, FGF2, ACTG1, FGFR2, PIK3R1, GNA13, SCIN, INS, H…	Up-regulated
492	LEE_EARLY_T_LYMPHOCYTE_dn	0.00661901	0.0322811	0.405364	1.61755	24	55	EMP3, ID2, GPR183, MAN1C1, ATM, IL6R, S1PR1, BTLA, SLC2A3, CYLD, CYTIP, SAMHD1, ACTN1, HLA-E, GBP2, IFITM2, NELL2, MAP3K1, TRABD2A, LDLRAP1, PTPRJ, FOXO1, HLA-B, DENND2D	Up-regulated
494	SENESE_HDAC1_AND_HDAC2_TARGETS_up	0.000688231	0.00610686	0.318226	1.61674	1	228	PRRX1, COL6A3, FN1, SCG5, GFPT2, SFRP1, CHST11, C3, CDC42SE2, LAPTM5, EPHB1, LDB2, COPA, MMP9, PSTPIP2, PRDM1, ADGRL4, DCLK1, GCH1, RAB3B, IL6R, MAOA, PDE4D, GEM, STK10, PRR9, TTC37, POU2F2, RBPMS2, PLAUR, TMEM200A, IQGAP1, IL13RA2, HOMER3, BCL2A1, ESYT2, SRGN, ATP11B, IL7R, TNFRSF10B, IL6ST, PLEC, OSMR, TNFAIP3, CD55, TGFBR2, CPEB4, ADAMTS6, RGS2, ST3GAL1, CAMTA1, DNAJB14, LARP4, HAS2, IL1A, KYN…	Up-regulated
495	WP_AGERAGE_PATHWAY_up	0.00431383	0.0232803	0.388866	1.61644	15	66	MMP14, PLA2G4A, MSR1, HIF1A, SMAD2, MMP9, IKBKB, SMAD3, MMP2, CDC42, JAK2, ATF2, STAT3, NFKBIA, NCF1, MAPK1	Up-regulated
497	YAMAZAKI_TCEB3_TARGETS_up	0.00128123	0.00901286	0.333337	1.61533	3	161	NR2F2, ID2, EFEMP2, SPARC, CDC42SE2, SFMBT2, JUND, LAMB1, CLU, PTPRM, FHOD3, ITGB1, NID2, SURF4, F3, CRYAB, LMBRD1, NID1, RNF24, CITED2, RAMP2, SPOCK1, MDFIC, GNG10, KDELR3, ZYX, CASKIN2, PSAP, HSPG2, SRGN, PLOD2, LPP, CITED1, MAN1A2, FUT8, TCF7L2, SERPING1, ARF4, GNS, CDH5, GREM2, MPZL2, KIT, GHR, CST3, YAF2, ERP44, KDELR2, APP, B2M, LAMA1, TIMP3, TST, DDAH1, CALU, VAMP8, COL4A1	Up-regulated
500	SEKI_INFLAMMATORY_RESPONSE_LPS_up	0.00382723	0.0212415	0.379325	1.61201	13	74	PRRX1, EGR1, VCAM1, NEURL3, CASP4, GCH1, STX11, ADAMTS7, NFKBIA, OSMR, PLK2, SH3PXD2B, TNFAIP3, ICAM1, SOD2, GBP2, CCL3, SLC11A2, EGR3, GBP4, SLC4A7, NFKB2	Up-regulated
503	PID_ILK_PATHWAY_up	0.0101642	0.0446965	0.4196	1.609	38	45	ZEB1, ARHGEF6, GSK3B, LIMS1, ELMO2, PPP1R14C, CDC42, IQGAP1, ARHGEF7, ZYX, GIT2, MYL9, PARVG, ACTN1, CCND1, PARP1, ILK	Up-regulated
504	WU_CELL_MIGRATION_up	0.00130293	0.00913683	0.327974	1.6083	3	175	RAB31, FN1, NR2F2, BICC1, SNAI2, EMP3, DSE, EFEMP1, DCBLD2, VCAN, CHST15, CLU, AKAP12, ARHGDIB, IGFBP3, MT2A, ARL4C, GLIPR1, SERPINE1, THBS1, GNG11, CTSH, ADAMTS1, PLIN2, MAOA, WWTR1, MT1X, DKK3, COL6A2, IGFBP7, BST2, CDA, LPAR1, SRGN, ARHGAP29, ITGB4, ASAH1, OLR1, CD55, UGCG, AHNAK2, GJA1, TACSTD2, ARID5B, VIM, AKR1C1, IL1A, TXNIP, CSTB, FGF2, IGFBP6, TFPI2, TIMP3, KYNU, ANXA8, EEF1A2, S100A2, C…	Up-regulated
506	RAMALHO_STEMNESS_dn	0.00465881	0.0245891	0.383024	1.60658	16	70	EVI2A, CD53, SLC11A1, RGS10, PTPRC, NHSL2, NRP1, CD68, SLFN12L, PPP3CA, PPP2R5A, ARG2, LY6H, HDC, ADGRE1, PACSIN1, MAL, NIN, GSN, CTSB, EVL, HSD11B1	Up-regulated
508	ENGELMANN_CANCER_PROGENITORS_up	0.00943149	0.0420941	0.412512	1.60527	35	48	BASP1, MB21D2, IGFBP3, KCNN4, ELOVL5, MAST4, PMP22, FTO, CDC14B, GEM, FAT1, PDCD4, MYO5A, RASD1, BAMBI, SFXN1, CD55	Up-regulated
509	CERVERA_SDHB_TARGETS_1_up	0.00175029	0.0114164	0.347229	1.60469	5	115	PLXDC2, INHBA, MYOF, JAM2, SGCB, SHOX2, GPX8, FSTL1, EPS8L1, SUCNR1, NEURL3, SCTR, TMEM156, PCSK5, COL1A1, HTRA1, ITGB6, SOCS2, SH3BGRL, KRT80, HPSE, RIMKLA, RFTN1, DUSP4, FAM149A, AQP1, PACSIN1, LONRF2, WLS, ANXA13, GALR2	Up-regulated
510	DACOSTA_UV_RESPONSE_VIA_ERCC3_TTD_dn	0.00442845	0.0236719	0.37009	1.60324	15	81	FAM168A, ATRN, SMAD7, COL1A2, RB1CC1, PTPRM, PDS5B, CDC42BPA, ZEB2, SKAP2, PLPP3, DST, MALT1, LPAR1, BICD1, INTS3, FAM155A, ATXN1, HAS2, CCND1, PEX14, WDR37, KLHL20, SERPINB2, ROR1, CTIF, GSE1, ACVR2A, TMCC1, SON, TOP1, DMD	Up-regulated
511	CHEBOTAEV_GR_TARGETS_up	0.00418877	0.0228344	0.374975	1.60105	14	77	EDNRA, TGFB3, PDGFRA, TTC28, GULP1, DOCK5, NRP1, CMAHP, NR3C1, SCRG1, NTRK2, IQGAP2, SULF2, SERPINB4, ZBTB16, CYP27A1, LY6H, DDIT4L, OLIG1, ITPR1, MGAT4A, ZNF101, SLC26A6	Up-regulated
513	KARLSSON_TGFB1_TARGETS_dn	0.00131796	0.00919622	0.322096	1.59267	3	186	COPZ2, SFRP2, DCN, PDGFRA, CCDC80, ID2, DNMT3A, BNIP3L, RGS10, DAB2, COL6A1, PNRC1, PTPN13, GABARAPL1, NREP, NID2, NPC2, GDI1, ALCAM, MAOA, WWTR1, ITM2B, CTSA, SH3BGRL, TNRC6B, FTH1, CHP1, C4B, ZFP36L1, RSRP1, DENND4C, STAT3, SLC44A1, TBCEL, NET1, FUT8, SMARCA2, GABARAP, OSBPL9, NPNT, ACTN1, CST3, GAS1, PLXNB2, CNTNAP1, GSN, CTSB, LAMP2, RNF11, TBC1D2B, CTDSP2, ALAD, IAH1, PIK3R1, UPF3B, VAMP8	Up-regulated
514	WP_HEMATOPOIETIC_STEM_CELL_DIFFERENTIATION_up	0.00820757	0.0378766	0.399072	1.59244	30	55	RUNX1, CXCR4, LMO2, LEF1, VAV1, SPI1, SEC14L2, IRF5, RIOK3, KITLG, KCNH2, IL5, PIM1, FOS, IL1A, TNXB, CD34, FOSB, IL1B	Up-regulated
515	JINESH_BLEBBISHIELD_TO_IMMUNE_CELL_FUSION_PBSHMS_up	0.000414594	0.00457585	0.296706	1.59216	0	369	NR2F2, BICC1, FPR3, PCDH7, PLS3, BASP1, ACTA2, EFEMP1, MPRIP, GJB2, SLIT3, UBE2E2, ERRFI1, EGR1, CLIC3, TAGLN, PDLIM5, PLXNA1, IGFBP5, SLC4A11, KCNN4, ITGB1, THBS1, FBXO32, CD59, TRIAP1, MSX2, SMAD3, ITGAV, CDC42EP3, RHOC, DYNC1H1, WWC1, DMWD, DKK3, CITED2, VKORC1, KIFC2, HSPB8, FAT1, SPOCK1, FAM107B, TRIO, PAM, FLNB, PMEPA1, CHKB, DUXAP10, KRT80, ADAM9, FRMD3, KITLG, ZYX, RSRP1, GABBR1, MBOAT7, …	Up-regulated
517	BHAT_ESR1_TARGETS_NOT_VIA_AKT1_dn	0.005	0.025842	0.362738	1.58268	17	84	FRMD6, PSD3, CHST15, LAMB1, NRP1, TGFB2, SUSD6, RGL1, CREB3L2, SMAD3, KLF9, SEMA3E, TNS3, TRAM2, SLC29A3, TCF7L2, ATXN1, CD55, CPEB4, ARID5B, SASH1, ALAD, KYNU	Up-regulated
519	KAN_RESPONSE_TO_ARSENIC_TRIOXIDE_up	0.00208706	0.0130799	0.339282	1.57789	6	121	PDGFRA, GFPT2, ID2, BNIP3L, DCBLD2, VCAN, MGP, GABARAPL1, MT2A, GPM6B, ARL4C, IGFBP5, CLEC2B, SERPINE1, RGS4, THBS1, CRYAB, SLC30A1, DPYSL3, MT1X, SOCS2, SLC2A3, PTPRZ1, GPR65, FABP4, IL7R, ARHGAP29	Up-regulated
520	RUTELLA_RESPONSE_TO_CSF2RB_AND_IL4_up	0.000393701	0.00445498	0.297605	1.5748	0	326	CLIC2, GBA, LXN, RUNX1, SLC12A8, RDX, INHBA, CYP1B1, PSD3, CD58, SLAMF1, STOM, C1S, PLPP1, SERPINF1, NRP1, PLXNA1, ANOS1, C3orf18, CXCR4, MMP9, SERPINE1, EIF2B3, SLAMF7, ABCG1, RUNX3, ROBO1, RGL1, CD59, CD84, MAOA, ATP6V0E1, SDC2, MMP2, FTH1, TRAF3, TNS3, LTBP2, FNBP1, RAB8B, TNFAIP6, PLPP3, TIA1, IRF4, ACO1, EMILIN1, CDKN1A, GABBR1, DAD1, LPAR1, RFTN1, SLC29A3, CSRP1, IL6ST, NET1, CELF2, ZDHHC18…	Up-regulated
525	WP_SPINAL_CORD_INJURY_up	0.00176263	0.0114469	0.337501	1.56386	5	117	CHST11, VCAN, SLIT3, EGR1, C1QB, NOX4, MMP9, PTPRA, TLR4, ROS1, FCGR2C, RHOC, IFNG, PPP3CA, TACR1, ANXA1, CDC42, PTPRZ1, FKBP1A, ROCK2, FCGR2A, AQP1, MAPK1, ZFP36, ICAM1, BCAN, GDNF, GJA1, ARG1, FOS, VIM, RTN4, IL1A, CCND1, CDK2	Up-regulated
526	WP_MYOMETRIAL_RELAXATION_AND_CONTRACTION_PATHWAYS_up	0.00252366	0.0152201	0.323997	1.56315	7	154	ACTA2, ADCY1, RGS10, PLCG2, RGS9, IGFBP3, RGS1, IGFBP5, PKIA, RGS4, CALD1, GNG11, PRKD1, ATF5, PRKACB, PDE4D, YWHAH, GNB1, RAMP2, ARRB2, RYR2, ATF2, CAMK2A, LPAR1, ACTA1, ACTB, CAMK2D, ITPR1, RGS2, GUCA2A, GJA1, PLCB3, FOS, IGFBP6, PDE4B, RXFP1, ACTG1, RXFP2, PRKAR1A, ADCY4, IL1B, DGKZ, CALM2, ADCY6, GABPB1, GNB3, ACKR3	Up-regulated
528	XIE_ST_HSC_S1PR3_OE_up	0.00196335	0.0124791	0.317674	1.56201	5	178	COL6A3, ID2, CYP1B1, SAMD9, CPXM2, SP110, DAB2, PLPP1, RGS1, SUCNR1, SERPINE1, AK5, KCNA3, LAX1, RYR2, EIF2AK2, BST2, HPSE, BCL2A1, AVPR1A, PLEK, CXCL11, CLDN16, BAMBI, IFIT1, IFIH1, ADAM12, HERC5, MYL9, SLFN5, MX1, PRR5L, LAMP3, ATP8A2, HMCN1, SAMD9L, GBP2, CMKLR1, ABCA1, RAB27B, SPATS2L, GSN, SPP1, VCL, EGR3, DAPP1, HSPB1, SHISA5, WNT11, ROR1, IFIT5, RNF213, BCAR1, HELZ2, PARP9, AFAP1, DDX58, K…	Up-regulated
529	PLASARI_TGFB1_TARGETS_10HR_up	0.00199071	0.0125816	0.314715	1.56198	5	191	TSPAN2, GFPT2, RUNX1, INHBA, CHST11, ENTPD7, GJB2, MMP9, SERPINE1, ITGA5, TTC9, HTR2B, FBXO32, CRISPLD2, LRRC8C, CREB3L2, GCH1, HECTD2, DUSP14, SOCS2, PLAUR, FLNB, PMEPA1, COL8A2, HCK, IER2, HIP1R, ACTA1, ALS2CL, IVNS1ABP, NFATC1, OLR1, ADAM12, RNF149, NTF4, TNFAIP3, SLC20A1, CDH6, GREM2, CMKLR1, HSPA2, TNC, JUNB, HK2, ARG1, HAS2, CX3CL1, TGFBR1, FGF2, GJA3, TFPI2, TIMP3	Up-regulated
530	ROSS_ACUTE_MYELOID_LEUKEMIA_CBF_up	0.00667223	0.0324215	0.361611	1.56142	23	80	SPARC, PSD3, HLA-DPA1, CD58, HIF1A, ATP2B4, ROBO1, HLA-DMB, NCALD, TRIO, MYH11, SIPA1L1, ADARB1, VAMP5, HLA-DPB1, ITGB4, OGG1, JUNB, WFDC1, RUNX1T1, IL5RA, CD34, HYAL2, SLC8B1, MN1, CLIP2, BLVRA, TPK1	Up-regulated
531	RODRIGUES_THYROID_CARCINOMA_dn	0.00609418	0.0304437	0.365809	1.56088	21	76	FN1, SAMD9, DCBLD2, HIVEP2, PHLDB2, BNC2, THBS1, TAB2, ROBO1, ALCAM, CDC42EP3, KATNBL1, KANSL1, ERCC6L2, PMEPA1, SRGN, ARHGAP29, PLEC, ATXN1, UGCG, AIG1, COL8A1, DUSP10, PCBP2	Up-regulated
532	PODAR_RESPONSE_TO_ADAPHOSTIN_up	0.0027881	0.0164822	0.32931	1.55992	8	138	CLIC2, ID2, ZEB1, RB1CC1, CLK1, JUND, CLU, PNRC1, GABARAPL1, SEC24D, IGFBP3, CLEC2B, NLRP1, DUSP1, WDR26, ZNF165, FTH1, ANXA1, ZFAND5, DNAJB9, CYTIP, ZFP36L1, DGKG, PLEK, ITGAX, IL23A, MORC3, CSGALNACT2, CD55, RGS2, PALLD, NEK1, ARID5B, HDLBP, AKR1C1, FTH1P5, SLC38A2, HSPB1, CCNG2, SOX4, RAB9A, MAFG, P4HA2, MAP1LC3B, ACTR10, ADAM17, BACH1, GOLGA2, RAP2B	Up-regulated
535	DAWSON_METHYLATED_IN_LYMPHOMA_TCL1_up	0.0111406	0.0474534	0.384308	1.55644	41	58	MEDAG, ADGRL2, RNF180, ISM1, TBX18, GOLGA5, TMEM229A, NRSN1, TNS3, TSHZ3, SLC24A3, MDGA2, AUTS2, GAS1, RUNX1T1, FIGN, FOXC1	Up-regulated
537	JISON_SICKLE_CELL_DISEASE_up	0.0019544	0.0124399	0.316916	1.55407	5	175	CLIC2, FN1, VSIG4, RRP7A, EMP3, TIMP1, BNIP3L, TFEC, NREP, GNG11, RGL1, CTSA, GTF2B, RNF24, YWHAH, STX7, ATP6V1D, SLC2A3, JAK2, MPP1, BST2, LILRA2, CDKN1A, VAMP5, PLEK, TPM1, IFIT1, MYL9, MX1, UBE2L6, GAS2L1, PRDX4, SERPING1, DYNLT1, ZMPSTE24, LHFPL2, ITGB5, IQCE	Up-regulated
538	YAUCH_HEDGEHOG_SIGNALING_PARACRINE_up	0.00216316	0.0134462	0.328266	1.55396	6	137	COL10A1, SRGAP2, SCG5, SFRP1, TRPC1, NOG, KCNE4, HEMGN, IGFBP5, TRIM5, LCA5, PCSK5, THSD4, ST8SIA2, NTRK2, SPOCK1, BST1, TRAM2, SPON1, LEPR, GLI2, PENK, MPZL2, RAB22A, SCARA5, GALR2, TNFRSF9, REG3G, C14orf39, DUSP15, DMC1, HSD11B1, SLC25A4, FOXD1, CTDSP2, WNT9B, GZMB, SCN2A	Up-regulated
540	DUAN_PRDM5_TARGETS_up	0.00796922	0.036967	0.363914	1.54954	28	75	EDNRA, RUNX1, ID2, SIK1, NREP, OVOL1, PPIL2, IL6R, RARA, DKK3, PHC1, PIAS3, CD99, CLDN16, INTS3, EMID1, RUNX2, CLK3	Up-regulated
541	SENESE_HDAC1_TARGETS_dn	0.000698324	0.00617197	0.302148	1.54886	1	244	GXYLT2, AASS, TCF4, COL3A1, BNIP3L, EFEMP2, SDC1, CRMP1, FGFR1, DAB2, CSRP2, PHLDB2, BNC2, NOX4, SLX4IP, FKBP7, ZBED5-AS1, COL11A1, NREP, FSTL1, IGFBP5, TRO, NLRP1, KLF7, TGFB2, NRBP1, CPE, TIAM2, COL1A1, CDC42EP3, MAF, DKK3, SMARCA1, RNFT1, COL5A1, TK2, NAP1L3, CDC42, FAM114A1, TIA1, MEIS1, CADM3, ROCK2, GLI2, MATN3, LOXL4	Up-regulated
542	REACTOME_SIGNALING_BY_BRAF_AND_RAF_FUSIONS_up	0.0107066	0.0462647	0.374717	1.54784	39	64	FN1, MPRIP, QKI, ATG7, PAPSS1, APBB1IP, ARRB2, RAP1A, JAK2, IQGAP1, CAMK2A, ACTB, CAMK2D, FAM114A2, MAPK1, ZC3HAV1, AGK	Up-regulated
545	GINESTIER_BREAST_CANCER_ZNF217_AMPLIFIED_up	0.0110393	0.0471565	0.369693	1.53954	40	67	COMMD1, POLK, SCAF11, BTD, APBB2, SF3B1, DNAL1, LIN52, FAM114A1, ATP6V1A, TRIP11, BLOC1S6, GINM1, WSB1, SNX9, LPP, BMPR2, SIAH1, DNAJB14, N4BP2, KLHL20, SLU7, ATG12, CHURC1	Up-regulated
546	GENTILE_UV_LOW_DOSE_dn	0.0115436	0.0488451	0.374029	1.5376	42	63	CDK14, COL6A1, PTPRM, SEMA3C, MEIS2, IGFBP5, FTO, VEGFC, C2CD2, PPP2R3A, FNBP1, SIPA1L1, SEMA5A, RFTN1, SLC20A2, CXCL12, RBMS1, UTRN, ERC1, PEX14, DYNC1LI2	Up-regulated
550	REACTOME_PLATELET_ACTIVATION_SIGNALING_AND_AGGREGATION_up	0.0010627	0.00787728	0.297441	1.53204	2	255	GNAI2, TGFB3, FN1, PCDH7, TIMP1, PLA2G4A, SPARC, COL1A2, PLCG2, PIK3R5, CLU, SERPINE1, TGFB2, THBS1, GNG11, COL1A1, VEGFC, CD109, P2RY12, APBB1IP, GNB1, ANXA5, RAPGEF3, DGKB, ECM1, VAV1, FLNA, VEGFB, ARRB2, RAP1A, GNG10, GNAI3, RASGRP1, CDC42, SOS1, PSAP, PTPN6, DGKG, PLEK, SRGN, MAPK1, SERPING1, CD63, PECAM1, LHFPL2, MANF, ABHD12, ACTN1, ITPR1, PDPN, ADRA2A, GNA14, RAB27B, A2M, LAMP2, VCL, QSOX1…	Up-regulated
551	WIERENGA_STAT5A_TARGETS_up	0.00234584	0.0143407	0.306978	1.52803	6	195	FPR3, SLC2A14, DAB2, EGR1, COL6A1, DPYSL4, GABARAPL1, RGS1, IGFBP5, CFH, SMAP2, FNDC3B, CPXM1, CTSH, PLIN2, MAOA, EMP1, CERCAM, RNF144A, SOCS2, FAM126B, NT5C3B, ARG2, GGT5, CALB2, SOS1, GPR65, ST3GAL4, CTXN1, IL7R, PIM1, KISS1R, PRDM8, OLR1, FCGR2A, LAMP3, CD83, NAAA, SH3BP4, HBZ, ABCA1, HSPA2, OSBP2, TGFBR1, P3H2, SPP1, CCL3, SLC25A4, GBP4, RNF217, GNPTAB, TP53INP2, BATF3, SAMSN1	Up-regulated
552	CHANDRAN_METASTASIS_dn	0.000769527	0.00651506	0.291343	1.52632	1	301	PRRX1, CYBRD1, TSPAN2, PCDH7, SFRP1, MXRA5, EFEMP2, PSD3, RNF180, OGN, MLLT10, B3GALNT1, ZNF532, SEMA3C, FHOD3, RWDD2B, LHPP, KCNN4, PIGT, DUSP1, RGCC, PDE5A, GLI3, CRISPLD2, RBM24, SSPN, KLK11, SMAD3, SWT1, ASAP3, THSD4, SLC30A4, HSPB8, RAMP2, ALKBH3, CLCN7, TMEM106B, IQGAP2, NEXN, PMEPA1, COL8A2, ROBO2, FGL2, IER2, GABBR1, LPAR1, PODN, SLC15A2, PCAT14, FGF13, NAGLU, SLC20A2, TSHZ3, CUEDC1, FMOD…	Up-regulated
554	CHANG_IMMORTALIZED_BY_HPV31_up	0.0110631	0.0472133	0.364264	1.52353	40	68	LGALS1, BHLHE41, SGIP1, SLC9A9, S100A12, MS4A6A, CTSH, TAOK1, MAP9, IRF4, WDR81, FMOD, EDIL3, LTBP1, BMPR2, PRKAA2, SUCLA2, MS4A4A, TTC38, PSME4, ASAP1, HMG20A, CP, ACVR2A	Up-regulated
556	BIDUS_METASTASIS_dn	0.00372671	0.0207188	0.320205	1.52076	11	140	PRRX1, DAB2, CLU, KLHL2, HLA-DRA, GABARAPL1, AKAP13, ZNF45, FBXO32, GYPC, RGL1, MS4A6A, ZBTB20, SELPLG, PLEKHA2, GMFG, ATP8B4, ENG, AHR, SEMA5A, SIDT2, PIP, MVP, PPM1M, AQP1, DISP1, ACTN1, ACADS, ZNF641, FAM122A, PTP4A3, ZNF404, SLA, PGAP3, NAGK, CNRIP1, TRPV2, CD34	Up-regulated
557	LI_WILMS_TUMOR_VS_FETAL_KIDNEY_1_up	0.00263158	0.0157648	0.309662	1.5202	7	177	FRY, PLS3, MYOF, COL1A2, DAB2, PLCG2, PLPP1, LDB2, CLU, SEMA3C, SERPINF1, GNG11, ATP10D, PMP22, NR3C1, RGL1, CRYAB, CTSH, SLC30A1, ALCAM, ITM2B, MAF, IGFBP7, PPP2R5A, ZEB2, TRAM2, XBP1, IQGAP2, IQGAP1, MXRA8, DST, ALDH1A1, VLDLR, PRCP, IFIT1, CRYZ, ASAH1, IL10RB, PPP1R3C, TGFBR2, UGCG, CDH5, MYH9, RAB22A, TACSTD2, TNFAIP8, CX3CL1, SPP1, LAMP2, KCTD12	Up-regulated
559	AFFAR_YY1_TARGETS_up	0.0023225	0.0142668	0.305963	1.51854	6	191	COL10A1, FABP3, EFEMP1, POLK, CLU, EBF2, SLC12A5, HEMGN, PLTP, CFH, DUSP1, TGFB2, GRIA3, CRYAB, ALCAM, SNRPN, MMP2, UBC, ITGB6, SURF1, RAMP2, SLC2A3, NAP1L3, PRSS35, SULF2, CDKN1A, SH2D1A, PLOD2, SERPINB4, GFER, TPM1, MYH1, LDB3, ST6GALNAC3, CELF4, AJUBA, TNNC2, MYO1C, PAFAH2, ICAM1, S1PR5, SIN3A, GBP2, ABCA1, CDO1, TNNC1, FOS, PTP4A3, MAL, TXNIP	Up-regulated
561	VERHAAK_AML_WITH_NPM1_MUTATED_dn	0.00140203	0.00968029	0.296636	1.51501	3	239	IFI16, PRKD3, DSE, SPARC, MEF2A, HLA-DPA1, PLXND1, FGFR1, MEG3, PTPRM, LPAR6, SERPINF1, GPM6B, RGS1, LMO4, MMP9, ST18, HLA-DQA1, GYPC, RUNX3, ROBO1, ADIPOR1, CD200, SNRPN, CD48, EMP1, TM6SF1, C2CD2, IGFBP7, PCDHGC3, MYH11, PAM, MDFIC, FLNB, SPON1, SCRN1, HLA-DPB1, HSPG2, VLDLR, FGF13, ZHX2, NT5E, FZD6, MX1, SERPING1, LHFPL2, UGCG, SH3BP4, GJA1, KIT, MSLN, TACSTD2, ARHGEF17, GSN, EVL, MXRA7, EHD3,…	Up-regulated
562	JINESH_BLEBBISHIELD_TRANSFORMED_STEM_CELL_SPHERES_up	0.00290698	0.0169833	0.311016	1.51455	8	167	LXN, PCDH7, CYP1B1, SAMD9, FTLP2, IGFBP3, CBR3, SERPINE1, THBS1, RGCC, SDCBP2, KRT23, FBXO32, S100A9, SMAD3, EMP1, MT1X, FTH1P23, TMEM163, FTL, PGM3, IFNGR2, FTH1, ANXA1, TMEM106B, HAS3, PLPP3, CHMP1B, ALDH1A1, IL7R, PPP1CB, PIM1, PLEC, OLR1, MX1, LAMP3, UGDH, SOD2, FTH1P20, ST3GAL1, RAB22A, JAK1, RAB27B, TXNIP, SPP1, CTSB	Up-regulated
563	SHEDDEN_LUNG_CANCER_GOOD_SURVIVAL_A12_up	0.000754148	0.00648625	0.289176	1.51396	1	296	DMXL2, OGFRL1, MMP14, BASP1, CHST11, EFEMP2, SEC24A, IRAK3, RHOQ, DPYSL4, SRF, SH3D21, IGKV1D-13, SLAMF7, EAF2, PRDM1, IGHV4-61, IGKV2D-28, MSX2, IGKV4-1, ATF5, TRIM26, CEP135, SLC2A5, TCL1B, DLG4, TNFRSF17, IGKV1D-39, BBIP1, ZBTB25, LAX1, CNR1, TRAM2, DNAJB9, UBE2J1, ABCA12, TCP11L1, CYTIP, IGKV1D-37, IRF4, IGLV3-19, IGKV1OR1-1, IFNAR2, DENND5B, IGLL3P, SERPINB3, SERPINB4, SLC38A7, ITGB4, SEC14L…	Up-regulated
564	QI_PLASMACYTOMA_up	0.0010612	0.00787728	0.294379	1.51329	2	251	ALOX5AP, ID2, CD53, MFAP1, SWAP70, SLAMF1, SLC43A3, CLU, PTPN13, ARHGDIB, RGS1, SRF, ITGB1, TRIM5, GNG11, IRGM, RGL1, CASP4, CDC42EP3, LCP1, STK10, VAV1, RBP4, RASSF2, LASP1, GNG10, PLXNC1, PTGS1, LIMK1, FGL2, ZFP36L1, HCK, ZYX, PTPN6, PLEK, SH2D1A, CCR1, SNX2, PLEC, TRIM21, NFKBIA, TNFSF11, TNFAIP3, PLEKHO1, HCLS1, BAG2, LST1, CCR5, TNFRSF14, KIT, GBP2, CD22, PAK1IP1, FLT3, TMOD3, SLA, CCL3, IL5…	Up-regulated
566	TARTE_PLASMA_CELL_VS_PLASMABLAST_up	0.000426985	0.00464248	0.279674	1.50708	0	386	TGFB3, ALOX5AP, RUNX1, QPCT, FABP3, SDC1, FBN1, DAB2, EGR1, MME, JUND, C1S, CLU, NOP14-AS1, VCAM1, COL11A1, NREP, FSTL1, MMP9, COL14A1, DUSP1, SPRR2A, HLA-DQA1, CBLB, S100A9, CRYAB, AEBP1, COL1A1, FCGR3B, LRP1, RBMS2, CR1, DLG4, FTL, PCDHGC3, PAM, LTBP2, FLNB, PLPP3, MDK, CALB2, PBX2P1, C4A, APOC2, PSAP, ADH4, SLC5A5, ALDH1A1, SLC15A2, SERPINB4, IL7R, ITGA8, RAB32, ITGAX, CDKL5, TPM1, AK1, NFKBIA…	Up-regulated
567	DURCHDEWALD_SKIN_CARCINOGENESIS_dn	0.00107181	0.00789932	0.291487	1.50488	2	259	GBA, LXN, RUNX1, SMAD7, PIAS1, BCAR3, VGLL3, PHLDB2, QKI, SEMA3C, KCNN4, ITGB1, CREBBP, CCDC88A, STK3, RNF38, ESM1, GSK3B, ABCG1, TMEM47, CDC40, NRIP1, DDX3X, STIM2, RAPGEF3, TAOK1, TMEM163, CRYBG3, MAPK6, TMEM106B, PMEPA1, STX11, HOMER3, ATF7IP, ADARB1, SAMHD1, FLRT2, PTPRZ1, KDM5B, SNX9, FABP4, RUSC2, TPBG, NET1, TPM1, GIT2, ZHX2, ADAM12, CAMK2D, ELL2, PLK2, MACF1, TPM4, TBL1X, CPEB4, CADM1, UT…	Up-regulated
568	RICKMAN_TUMOR_DIFFERENTIATED_WELL_VS_POORLY_dn	0.000409165	0.00453829	0.280484	1.5043	0	364	FRMD6, RAB31, PCDH7, PLS3, INHBA, SDC1, GJB2, TMEM154, DNAJB5, HIF1A, IGFL2, SAR1A, IL20RB, OSTM1, GPM6B, GLIPR1, KLF7, MAST4, SDCBP2, PRDM1, OVOL1, LRRC8C, CASP4, SAR1B, GOLGA5, KLK11, ATP6V0E1, DUSP14, HTRA1, GOLT1B, ANKRD13A, MTF1, SLC30A4, PRR9, MAP4, ASPRV1, MAPK6, PLAUR, PAM, MYO5A, ABCA12, TCP11L1, PTGS1, CSNK1A1, HOMER3, TRIP11, KRT80, KDELR3, HPSE, FKBP15, CDKN1A, ABHD5, STARD5, FST, SLC…	Up-regulated
570	HOEBEKE_LYMPHOID_STEM_CELL_up	0.0087769	0.0399282	0.338636	1.50186	30	92	RAB31, BASP1, TCF4, MEF2A, PLXND1, NLRP1, RUNX3, SF3B1, SLC2A5, TNS3, SPON1, KLF3-AS1, ITSN2, MACF1, TNFAIP3, SLC24A3, UBR2, PALLD, ABCA1, MED13L, EVL, CYTH4, USP34, BTK, NUDT3, MN1, SETD5, CHD3	Up-regulated
571	KEGG_FC_GAMMA_R_MEDIATED_PHAGOCYTOSIS_up	0.00875706	0.0398785	0.336638	1.5011	30	94	PIP5K1A, PLA2G4A, PLCG2, PTPRC, PLPP1, PIK3R5, RPS6KB2, FCGR2C, ASAP3, VAV1, CDC42, PLPP3, ARPC3, FCGR3A, LIMK1, HCK, NCF1, FCGR2A, MAPK1, WASL, AKT2, FCGR2B, PIP5K1C, WASF2, CFL2, GSN, PIK3R1, SCIN, WAS, ASAP1, PIK3CB, PIP4K2B, MARCKS, AKT1	Up-regulated
573	KIM_WT1_TARGETS_12HR_up	0.00354153	0.0198867	0.308813	1.4975	10	163	PDGFRA, SNAI2, THY1, MYOF, BHLHE41, PSD3, FGFR1, DAB2, RHOQ, NOX4, GPR183, ZCCHC24, ATP2B4, ZSCAN31, SERPINE1, FERMT2, CREB3L2, SMAD3, CDC42EP3, HTRA1, PPP3CA, KLF9, PJA2, PCDHGC3, TNS3, UBE2J1, AAK1, GLI2, HNRNPL, HSPA12A, IFIT1, IL10RB, MYL9, AQP1, PLEKHO1, SLC20A1, ITGB5	Up-regulated
574	IVANOVA_HEMATOPOIESIS_STEM_CELL_up	0.00296638	0.0172404	0.302721	1.49607	8	185	EMCN, CDK14, TCF4, PALMD, ETV1, DNMT3A, SMAD7, ZC2HC1A, SLC23A2, SKIL, EGR1, SCAF11, ARL4C, PAIP1, CCDC136, CPXM1, NR4A2, ZBTB20, VAMP2, INPPL1, PRKACB, EMP1, GEM, ZDBF2, SOCS5, ENG, IQGAP2, PRCD, SOS1, RASD1, PRKG1, VLDLR, NFKBIA, IFIH1, SMARCA2, DYDC1, LPAR4	Up-regulated
575	TAKEDA_TARGETS_OF_NUP98_HOXA9_FUSION_3D_up	0.00328947	0.0187295	0.303017	1.48758	9	177	LOX, DMXL2, IFI16, SLC12A8, GBP3, PLA2G4A, EVI2A, SAMD9, ANGPT2, SP110, TTC28, PTPN13, CLEC2B, COL24A1, ZBTB20, RTN1, EIF2AK2, AHR, PTGS1, BST2, DST, HOXA5, MEIS1, ALDH1A1, BAMBI, MVP, IFIT1, IFIH1, HERC5, MX1, SERPING1, SAMD9L, INPP4B, AUTS2, ARID5B, CMPK2, RAB27B, SCN9A, SLC27A6, C3orf80, VMP1, SCN2A, PARP14, CRHBP, ARRDC4, SOX4, IDO1, VNN1, IFIT5, RNF213, PBX3, HELZ2, PARP9, DDX58	Up-regulated
576	WP_MAPK_SIGNALING_PATHWAY_up	0.00139665	0.00965799	0.2901	1.4871	3	244	TGFB3, IKBKG, PLA2G4A, FGFR1, LRRK2, JUND, CACNG7, SRF, DUSP1, TGFB2, TAB2, STK3, PTPRR, IKBKB, CACNB2, PPM1A, CACNG3, PRKACB, PPP3CA, PPP3CC, TAOK1, PTPN7, FLNA, NTRK2, ARRB2, RAP1A, RASGRP1, CDC42, FLNB, FGF7, SOS1, ATF2, MRAS, TRAF6, DUSP4, FGF13, FGF4, NFATC1, NTF4, MAPK1, FGF12, RASA2, TGFBR2, CACNG2, AKT2, FLNC, HSPA2, PPP3R2, FOS, DUSP10, PDGFRB, FGF10, TGFBR1, IL1A, FGF2, CACNG8, MAP3K1, …	Up-regulated
577	BLANCO_MELO_COVID19_SARS_COV_2_POS_PATIENT_LUNG_TISSUE_up	0.00469631	0.0247578	0.307308	1.48122	14	152	ALOX5AP, BASP1, LY96, SAMD9, IGSF6, TFEC, CD53, C3AR1, PSTPIP2, S100A12, GCH1, SP140, CSTA, APBB1IP, LCP1, AQP9, S100A11, RBP4, ARRB2, SPI1, EIF2AK2, HAMP, CDA, BCL2A1, MMP8, PLEK, SRGN, IFIT1, OLR1, ADGRE1, HERC5, MX1, LAMP3, P2RY13, GAPT, SAMD9L, C6, CASP5, GTSF1, IFITM2, ZBP1, ZDHHC19, CLC, SIRPB1, DAPP1, WAS, VTRNA1-1, TYROBP, CCDC60, MARCKS, TRIM38, LCP2, DOK3, CACNA1A, HS3ST3A1	Up-regulated
578	XU_GH1_AUTOCRINE_TARGETS_dn	0.00548948	0.0279573	0.31657	1.47873	17	126	RAB31, NR2F2, LXN, SULF1, MPRIP, ADCY1, RHOQ, PRLR, SEMA3C, THBS1, CMTR2, TSPYL5, CDC42BPA, DDX39A, PMEPA1, UNC5C, KRT80, SULF2, HPSE, KDM5B, BAMBI, TPM1, MCPH1, NAT1, PREX1, PLK2, UGDH, COQ4	Up-regulated
581	STEARMAN_LUNG_CANCER_EARLY_VS_LATE_up	0.00634825	0.0314623	0.315889	1.47198	20	124	PIAS1, OGN, CLK1, MDM4, APBB2, SMAD4, SF3B1, C1QTNF3, NRIP1, CD200, LIMS1, ZSCAN26, HTRA1, WDR26, DDX3X, TNPO2, IREB2, MOCS2, TUG1, ARPC3, PTGS1, TIA1, PARP6, GINM1, IFNAR2, WDR81, RNF149, VPS26B, MAPK1, CADM1, PIAS2, ARHGAP21, RELL1, ZNF101, SMO	Up-regulated
582	KEGG_AXON_GUIDANCE_up	0.00613874	0.0304963	0.314759	1.47193	19	128	GNAI2, SRGAP2, SLIT3, EPHB1, SEMA3C, NRP1, PLXNA1, CXCR4, ITGB1, GSK3B, ROBO1, PPP3CA, PPP3CC, CHP1, SEMA3E, GNAI3, PLXNC1, CDC42, UNC5C, LIMK1, ROBO2, NFATC4, ROCK2, SEMA5A, NFATC1, MAPK1, CXCL12, PAK3, SEMA3F, PPP3R2, CFL2, NGEF, PLXNB2	Up-regulated
583	TURASHVILI_BREAST_DUCTAL_CARCINOMA_VS_DUCTAL_NORMAL_dn	0.00368509	0.0205384	0.296008	1.46368	10	189	APOD, SFRP1, PALMD, BHLHE41, MGP, RHOQ, EGR1, TAGLN, TSHZ2, FHOD3, GABARAPL1, GPM6B, MAOB, DUSP1, ATP10D, KRT23, FBXO32, CRYAB, CD59, AK5, CDC14B, RNFT1, ANXA1, SOCS5, MYH11, COL17A1, AMY1A, SCGB1D2, CSNK1A1, DST, C20orf194, SF1, SPIN3, TNFRSF10B, DSC3, ZBTB16, ITGB4, SEC14L1, ZNF204P, PAK3, GABRP, SOD2, CYB5R2, KIT, TNC, FOS, CLDN11, CX3CL1, PLEKHH2, CMTM8, CFI, TFPI2	Up-regulated
584	WP_PI3KAKT_SIGNALING_PATHWAY_up	0.000801603	0.00655472	0.275664	1.46343	1	337	COL6A3, FN1, LAMA2, PDGFRA, IKBKG, COL1A2, ANGPT2, PPP2R2C, FGFR1, PRLR, COL6A1, PIK3R5, LAMB1, LPAR6, RPS6KB2, ITGA11, ITGB1, THBS1, GNG11, ITGA5, IKBKB, GSK3B, THBS2, CREB3L2, IL6R, TLR4, PPP2R1B, ITGAV, COL1A1, VEGFC, TCL1B, ITGB6, GNB1, COL6A2, VEGFB, NTRK2, PPP2R5A, PPP2R3A, GNG10, JAK2, FGF7, SOS1, ATF2, IFNAR2, KITLG, CDKN1A, LPAR1, IFNA14, IL7R, PPP2CA, ITGA8, IFNAR1, FGF13, ITGB4, OSMR, …	Up-regulated
586	GRAESSMANN_RESPONSE_TO_MC_AND_SERUM_DEPRIVATION_up	0.00307692	0.0177448	0.290835	1.45802	8	209	BGN, COL3A1, ABI3BP, C3, OGN, SP110, PHLDB2, FSTL1, ADAR, CDON, TRIM5, MNDA, IKBKB, SLFN12L, IRGM, TOR1AIP1, DKK3, STEAP4, IGFBP7, EIF2AK2, PMEPA1, FCGR3A, SAMHD1, BST2, WFDC21P, METTL7A, SLFN12, LY75-CD302, CEP112, PLEC, TRIM21, ACTB, IFIH1, MX1, AQP1, SLC24A3, TLR3, SOD2, TACR2, OSR1, GBP2, GHR, LIPA, CMPK2, PDGFRB, TXNIP, MOCS1, ZNF101, HSD11B1, KCTD12, ZBP1, TSPAN33, CDK5R1, INHBB, SENP1, PRE…	Up-regulated
588	RIGGINS_TAMOXIFEN_RESISTANCE_dn	0.0034188	0.0193186	0.289965	1.45366	9	209	RAB31, APOD, BASP1, TIMP1, MYOF, COL3A1, CYP1B1, PSD3, CLK1, GULP1, SEMA3C, PDLIM5, APBB2, IGFBP5, CXCR4, HS2ST1, CNN3, ALCAM, EMP1, FAT1, CNR1, EIF2AK2, UBXN4, ADAM9, ZFP36L1, GREB1, IL6ST, SCN1A, NAT1, IFIH1, RBPJ, UBE2L6, ATP8A2, UGDH, PDE10A, NFYB, ATXN1, RBMS1, INPP4B, LTBP3, UGCG, RGS2, GJA1, PALLD, CLUAP1, NBPF14, ARID5B, AKR1C1, RAB38, LAMP2, IFITM2, STEAP3, PRNP, PIK3R1, UPF3B, EEF1A2	Up-regulated
590	MULLIGHAN_MLL_SIGNATURE_2_dn	0.00180115	0.0116296	0.279479	1.4479	4	266	NR2F2, LOXL1, IFI16, RUNX1, PTPN14, SPARC, FGFR1, DAB2, DPT, STOM, HIF1A, BCAT1, ST18, MAST4, HS2ST1, AP1B1, ITGAV, CD200, RAB11A, DUSP14, CD96, MMP2, TNPO2, ELMO1, NTRK2, LAX1, PDCD4, MYH11, EIF2AK2, GGT5, MDK, SIPA1L1, KDM5B, IER2, HIP1R, CD99, WFDC3, NET1, HMGN4, CLMN, MACF1, SLC24A3, TGFBR2, LHFPL2, STAT4, VGLL4, JAK1, N4BP2L2, TGFBRAP1, PTP4A3, CLIC4, DMXL1, APP, RUNX1T1, EGR3, USP34, TEAD4,…	Up-regulated
591	TONKS_TARGETS_OF_RUNX1_RUNX1T1_FUSION_HSC_dn	0.0040201	0.022049	0.292786	1.44774	11	189	LGALS1, ALOX5AP, ID2, CYP1B1, LAPTM5, JUND, PLPP1, SLC43A3, GPR183, IGFBP5, CXCR4, PMP22, S100A9, RUNX3, BIN2, TMEM156, IL6R, SELPLG, CD48, CSTA, MMP2, RARA, STK10, IL17RA, RASSF2, SPI1, PLXNC1, FPR2, KCNH2, IL7R, ZBTB16, CYBB, TPM1, HDC, FCGR2A, CD55, OGG1, IL10RA, KCNK5, LST1, ACTN1, DUSP10, DOK2, SLA, CCND1, EHD3, TIMP3, EGR3, CLC	Up-regulated
592	FOSTER_TOLERANT_MACROPHAGE_dn	0.000852878	0.00678819	0.268085	1.44658	1	390	OGFRL1, TCF4, PLA2G4A, CHST11, ZEB1, ADAMTS4, ADGRL2, VCAN, ERRFI1, SP110, HIVEP2, PHC2, PDLIM5, VCAM1, GDA, FMNL2, CHD1, KLF7, SERPINE1, TAB2, AFF1, MNDA, GYPC, NR3C1, IRGM, CNN3, GRAMD1A, SLC30A1, TNFSF8, ALCAM, ITGAV, TRIM26, DUSP14, MT1X, PLEKHA2, MAPKBP1, KAT6A, SOCS2, SLC30A4, CITED2, ENG, PLAUR, FLNB, JAK2, PMEPA1, SAMHD1, MALT1, ZYX, CDKN1A, LPAR1, PLOD2, CXCL11, STAT3, ATP11B, TPBG, FOXP…	Up-regulated
594	HAN_SATB1_TARGETS_dn	0.000825423	0.00666798	0.269192	1.44422	1	368	LOX, FN1, NR2F2, SCG5, INHBA, QPCT, TCF4, COQ5, CYP1B1, CHST11, EFEMP1, PCCA, LDB2, CLU, ANKRD6, NRP1, KCNN4, PXDC1, KLF7, PKIA, SERPINE1, DUSP1, RGS4, TGFB2, RGCC, MAST4, RCAN2, FAM20C, ADAMTS1, LEF1, HTRA3, CDC42EP3, PC, EMP1, CD96, CSTA, GMFG, KAT6A, THSD4, GNB1, SOCS2, COL6A2, PIGC, HBE1, IGFBP7, SMARCA1, DDX19A, PMEPA1, MPP1, DYSF, CALB2, SEC14L2, MXRA8, BST2, DST, ADPRM, METTL7A, LZTFL1, SL…	Up-regulated
596	OKUMURA_INFLAMMATORY_RESPONSE_LPS_up	0.00684039	0.0330656	0.292823	1.43593	20	175	RAB31, RUNX1, DSE, ZC2HC1A, SKIL, RGS9, GULP1, IGFBP5, THBS1, MAST4, AGT, RGL1, MSX2, ATF5, SMAD3, ALCAM, MAOA, CD200, CEP135, CITED2, TRAF3, TNS3, PAM, DOCK10, RASGRP1, ARG2, JAK2, PLPP3, HAMP, FKBP1A, IL5, N6AMT1, FZD6, OLR1, FCGR2A, TNFSF4, IL1RL1, TNFAIP3, ZFPM2, RUNX2, RAB38, CHST1, PEX12, SCN9A, C1orf109, SLC11A2, PDZD2, SLC4A7, FOXC1, ZNF571, ACSL1, SOX4, RAB9A, SEC63, APOL2, DNAJC6, MARCK…	Up-regulated
599	GROSS_HYPOXIA_VIA_ELK3_dn	0.00749766	0.035291	0.299178	1.43339	23	147	IFI16, C3, SKIL, ERRFI1, EGR1, SCAF11, PNRC1, GSPT2, AKAP12, PDLIM5, AFF1, IRGM, ZBTB20, TIAM2, CDC42EP3, XBP1, MMP8, PLEK, DZIP3, FST, SRGN, VLDLR, TRAF6, DUSP4, NFKBIA, RBPJ, PLK2, ZFP36, SLC20A1, GJA1, MYH9, TNC, FOS, LAMP2, HSPA5, TXNL1, MAP3K1, TRPS1, JMJD1C, SAMSN1	Up-regulated
600	DELACROIX_RARG_BOUND_MEF_up	0.00122649	0.00872367	0.2678	1.42992	2	354	TGFB3, FN1, LOXL1, ITGBL1, SULF1, MBNL1, PALMD, RB1CC1, SKIL, OGN, RHOQ, GABARAPL1, NRP1, RAB30, FSTL1, IRF2BPL, FAM20A, PIGT, NID2, DUSP1, TMEM179, AEBP1, INPPL1, PTTG1IP, NID1, DPYSL3, COL1A1, WWTR1, RHOC, DUSP14, EMP1, MMP2, RHOBTB2, UBC, PKM, DMWD, LRP1, FTL, FTH1, CLNK, ANXA1, RAMP2, FAM107B, DST, ARHGEF19, TMEM127, DDX5, KITLG, CNIH4, CLCF1, GPR146, ROCK2, WNT1, MATN3, DUSP4, ALS2CL, SHPK, …	Up-regulated
602	TORCHIA_TARGETS_OF_EWSR1_FLI1_FUSION_up	0.00249732	0.0150816	0.277181	1.42943	6	257	FRY, PCDH7, RUNX1, EMP3, DCLK2, ID2, PLSCR4, SLAMF1, LPAR6, GSPT2, PDLIM5, VCAM1, GDA, CMAHP, POPDC2, RGL1, CD59, TRIM26, DOCK11, RAB11A, PC, PCBP3, STIM2, HEY2, CPNE5, STX7, COL5A1, BEX4, HOMER3, CYTIP, CDA, KDM5B, TNFRSF18, ERO1B, TBCEL, NAGLU, MPPED2, ZNF185, ST6GALNAC3, IL1RL1, ZFYVE16, PECAM1, ZMAT3, PAFAH2, DERL1, VOPP1, RSPRY1, GNA14, ANKRD9, DUSP10, NXF3, HOMER1, SLC43A1, RAB27B, PCYT1B, …	Up-regulated
603	BILD_HRAS_ONCOGENIC_SIGNATURE_up	0.00453594	0.0240539	0.278235	1.42389	12	242	FN1, MFAP2, MMP14, RUNX1, TIMP1, PALMD, CYP1B1, CHST11, SDC1, PIAS1, TMEM154, MEG3, EGR1, KCNN4, DUSP1, TGFB2, MAST4, LRRC8C, TOR1AIP1, GLCCI1, TNRC6B, SLC2A3, PLAUR, ARG2, FLNB, IL13RA2, TIA1, HPSE, IER2, CLCF1, SERPINB3, KMT2C, TNFRSF10B, DUSP4, PIM1, RAPH1, NT5E, TCF7L2, CD55, ZFP36, SLC20A1, LHFPL2, AHNAK2, ABCA1, JUNB, HK2, FOS, SAMD8, GAS1, IL1A, MAP7D1, B3GNT5, TFPI2, TNS4, FOXQ1, ITPRIP, …	Up-regulated
604	SMIRNOV_RESPONSE_TO_IR_6HR_up	0.00901481	0.0406392	0.292785	1.41977	27	163	ACTA2, DSE, SDC1, SPARC, ADCY1, CLK1, PSTPIP2, IGHV4-61, TRIAP1, SLC30A1, GCH1, ZBTB20, RETSAT, ITM2B, DUSP14, MT1X, SOCS2, PROCR, SLC7A6, CDC42, ABCA12, METTL7A, CDKN1A, AAK1, TNFRSF10B, FDXR, FZD6, TNFSF4, LAMP3, PLK2, CCDC90B, TAX1BP3, LIG1, ZMAT3	Up-regulated
605	RUTELLA_RESPONSE_TO_HGF_VS_CSF2RB_AND_IL4_dn	0.00488656	0.0254613	0.277459	1.41824	13	240	CLIC2, RUNX1, INHBA, PSD3, VCAN, CD58, SLAMF1, PLPP1, SERPINF1, PLXNA1, NREP, C3orf18, CXCR4, ARHGEF6, ABCG1, RUNX3, ROBO1, MS4A6A, CD59, CD84, MAOA, SPOCK1, ZFAND5, FNBP1, RAB8B, TIA1, IRF4, CDKN1A, CFP, GABBR1, RFTN1, CSRP1, IL6ST, NET1, CELF2, ZDHHC18, ZNF185, ZHX2, CRYZ, ADAM19, ADAM12, LPP, POGLUT1, LAMP3, ZFP36, FILIP1L, CD83, RPL28, RGS2, N4BP1, MED13L, JAK1, TNFAIP8, LMBR1L, PTP4A3, RAB38	Up-regulated
607	IWANAGA_CARCINOGENESIS_BY_KRAS_PTEN_dn	0.00159936	0.0107126	0.264736	1.4097	3	343	PLXDC2, BGN, ZEB1, ADGRL2, PICALM, OGN, TTC28, DPT, CD28, PTPRC, LDB2, AKAP12, SPARCL1, CBR3, MEIS2, ANGPTL2, CPNE8, CDON, ST18, ZFHX4, PLTP, KLF7, TTLL8, ATP10D, PMP22, PRDM1, ADGRL4, MS4A6A, DCLK1, GPR107, NID1, B3GNT6, KATNBL1, GREM1, MMP2, NCALD, SMG9, NDN, ZNF429, UTP14A, MAP4, SEMA3E, RAMP2, DDN, ENG, MYO5A, KRT80, KITLG, FBXL7, ALDH1A1, CALCRL, RHOJ, PLOD2, TPM1, ST6GALNAC3, CHSY1, CDT1, X…	Up-regulated
608	TORCHIA_TARGETS_OF_EWSR1_FLI1_FUSION_dn	0.0026738	0.0159326	0.268287	1.40736	6	302	LGALS1, PTPN14, PRKD3, DNMT3A, NISCH, SDC1, ZC2HC1A, ADGRL2, GJB2, SKIL, UBE2E2, PTPRC, CPQ, LMO4, RGCC, PDE5A, MNDA, NR3C1, RUNX3, CNN3, CMTM7, SELPLG, MAOA, KCTD1, CDC42EP3, GMFG, TM6SF1, LCP1, RNF144A, ZNF429, ATP8B4, VEGFB, TRAF3, TNS3, SLC7A6, SOCS5, DOCK10, PLXNC1, IQGAP2, BEX4, PANX1, MEIS1, FKBP1A, BAMBI, CELF2, EIF4E3, ELL2, LTBP1, SLC6A13, ATXN1, LHFPL2, OAF, CNTLN, CCNYL1, LST1, ITPR1,…	Up-regulated
609	PASQUALUCCI_LYMPHOMA_BY_GC_STAGE_up	0.0032763	0.0186783	0.271451	1.40673	8	270	SNAI2, SLC12A8, BASP1, ANTXR1, CHST11, SDC1, SEC24A, SKIL, SLC16A6, B3GALNT1, PPEF2, ANKRD6, LAPTM4A, SEC24D, ATP2B4, KCNN4, ZNF25, FNDC3B, SURF4, EAF2, PRDM1, NCKAP1, CREB3L2, SELPLG, DUSP14, MT1X, ANXA5, CITED2, TNFRSF17, EXTL2, BMP8B, LAX1, SYNE4, XBP1, UBE2J1, IRF4, TMED9, KDELR1, DENND5B, STARD5, AMZ2, CD2BP2, INTU, EDEM1, IL6ST, EYA4, ELL2, PRICKLE1, YIPF6, HNRNPLL, CLVS1, NRG2, ITGB5, MANF…	Up-regulated
610	YAGI_AML_WITH_T_8_21_TRANSLOCATION_up	0.001229	0.00872768	0.263293	1.40633	2	355	LGALS1, BASP1, FBLN5, CDK14, CD74, PSD3, HLA-DPA1, CD58, PLXND1, STARD8, RGS10, TTC28, CLSTN1, LAPTM5, SWAP70, CSRP2, CDR1, PNRC1, HLA-DRA, GPM6B, CD68, PLTP, ARHGEF6, HLA-DQA1, GUCY1A2, GYPC, ROBO1, AP1B1, TIMELESS, SELPLG, MED12, CD200, LIMS1, HLA-DMB, ITM2B, DUSP14, MED21, CD96, NCALD, LCP1, ELMO1, STK10, POU2F2, DDX39A, SOCS5, TRIO, MDK, SIPA1L1, SCRN1, MEIS1, VAMP5, SH3GLB1, SEC62, HLA-DPB1,…	Up-regulated
611	WIERENGA_STAT5A_TARGETS_dn	0.00823995	0.0379745	0.283945	1.40327	24	185	PLXDC2, OGFRL1, IFI16, GPX1, PLCG2, SERPINF1, CXCR4, SLC9A9, PSTPIP2, GNG11, EAF2, CD84, CD96, IL17RA, TMEM163, RBPMS2, NAP1L3, STX11, LILRA2, MEIS1, ZYX, EMILIN1, TREML1, PLEK, SH3PXD2A, ROCK2, BAMBI, ZNF185, PADI4, TNNC2, LYZ, TPM4, SLC24A3, PECAM1, GAPT, LHFPL2, ITGB5, LST1, ACTN1, PRKD2, ARHGAP21, ADRA2A, WFDC1, DEPDC1	Up-regulated
613	BOQUEST_STEM_CELL_dn	0.00715015	0.0341212	0.279041	1.39918	20	208	EMCN, PALMD, CD74, JAM2, ANGPT2, HLA-DPA1, BCAR3, LAPTM5, SWAP70, KLHL2, PTPRM, LPAR6, HLA-DRA, SCUBE2, GNG11, MAST4, HLA-DQA1, ABCG1, ADGRL4, LMO2, CTSH, SSH1, CDC42EP3, GMFG, ARHGEF15, SOCS2, S1PR1, ENG, STX11, ZNF385D, BST2, HLA-DPB1, SRGN, MMRN2, SEC14L1, MCTP1, IFIH1, AQP1, PECAM1, CARD8, HLA-DQB1, CDH5, MPZL2, SEMA3F, TACSTD2	Up-regulated
614	REACTOME_MUSCLE_CONTRACTION_up	0.00761842	0.0356875	0.281211	1.39729	22	192	CLIC2, ABCC9, TRPC1, ACTA2, KCNE4, CACNG7, ATP2B4, CALD1, GUCY1A2, SCN4A, CACNB2, WWTR1, LMOD1, KCNIP4, KCNE2, ANXA1, MYH11, RYR2, DYSF, CAMK2A, KCNK9, KCNH2, ACTA1, MYL6, KCND2, KCNJ12, FGF13, TPM1, SCN1A, MYL9, TNNC2, CAMK2D, FGF12, TPM4, KCNK12, KCNK5, ITGB5, ITPR1, TNNC1, SCN5A, VIM, KCNK18, TMOD3, KCNK4, VCL, SCN9A, CACNG8	Up-regulated
615	BLALOCK_ALZHEIMERS_DISEASE_INCIPIENT_up	0.00164948	0.0109339	0.260115	1.39544	3	366	EDNRA, BGN, LAMA2, DCN, SFRP1, NEK7, EFEMP2, EFEMP1, FBN1, HLA-DPA1, VCAN, CD58, MFAP1, RHOQ, SLAMF1, RGS9, JUND, CLU, QKI, CPQ, AKAP13, ANGPTL2, GTF2H3, PCDH11X, ATP10D, GSK3B, PTGIS, HS2ST1, SSPN, LEF1, IL6R, GPR107, SSH1, WWTR1, ZNF268, PC, PBRM1, IFNG, ARHGEF15, IL17RA, CR1, RAB1B, RBBP5, PGM3, TNS3, FNBP1, GNAI3, EIF2AK2, PTGS1, COL8A2, MALT1, PLOD2, MAB21L2, GLI2, PRCP, FLII, COG4, IL10RB, …	Up-regulated
616	LINDGREN_BLADDER_CANCER_CLUSTER_3_dn	0.00721898	0.0343764	0.276286	1.39238	20	217	FRMD6, SNAI2, IFI16, MXRA5, PSD3, MLLT10, PLCG2, ARHGAP1, LPAR6, PTPN13, AKAP13, HEMGN, NLRP1, TUSC3, MAST4, GLI3, IKBKB, ABCG1, CASP4, CTSH, SMAD3, RGS12, ROS1, TRNP1, POLI, LIMS1, MED28, SNRPN, PDE4D, GMFG, THSD4, ZNF516, SPOCK1, TK2, DST, FGL2, MEIS1, C20orf194, SH3PXD2A, SEC31B, PIGB, NT5E, AJUBA, CUL4B, ATXN1	Up-regulated
619	PEDRIOLI_MIR31_TARGETS_dn	0.00128425	0.00901992	0.25615	1.38207	2	389	LAMA2, PLA2G4A, SAMD9, BHLHE41, ANGPT2, ZFAND6, PLXND1, SLIT3, PLPP1, LDB2, CLU, HLA-DOA, ZNF532, AKAP12, NRP1, VCAM1, ZNF333, ERV3-1, BACE1, CMTM3, ROBO1, NR4A2, NACAD, GCH1, CACNB2, HTRA3, NID1, ZNF568, CEP135, EMP1, ZNF304, SMG9, CEL, OR5E1P, LYVE1, GLRB, FLOT1, RASSF2, RAMP2, ADAM32, ATXN1L, COL17A1, PCLO, ZFAND3, FGL2, ZNF415, FLRT2, RASD1, SPIN3, ARHGAP29, WFDC3, PRCP, ITGB4, IL23A, DNAJC14…	Up-regulated
620	MCBRYAN_PUBERTAL_BREAST_3_4WK_up	0.00882852	0.0400817	0.275634	1.37661	25	202	EDNRA, TGFB3, FN1, SRPX2, MMP14, SFRP1, RUNX1, HACD4, BASP1, PTPN14, SDC1, EFEMP1, CLU, GABARAPL1, CD248, FBXO32, PLET1, ANO1, PRKACB, UNC119, SLC2A5, WWC1, HSPB8, RASSF2, MYH11, CSN1S1, APOC2, ADGRD1, SLC15A2, FGF13, GAB1, RNF149, CITED1, PLK2, CD55, GABRP, CDH5, KIAA1522, GJA1, KIT, TNC, CYB5R3, TACSTD2, COL8A1, SGTB, PDK1, HAS2, HLA-DRB1, RAB27B, GAS1, GSN, SPP1, HSD11B1	Up-regulated
623	GABRIELY_MIR21_TARGETS_up	0.00854701	0.0390808	0.261483	1.35836	22	278	CYBRD1, TRIM59, NEK7, TRPM7, B3GALNT1, WNK1, PLPP1, SCAF11, ZNF532, ATP2B4, ADGRG2, VASH2, TGFB2, CALD1, RNF38, FERMT2, ZBTB20, TLR4, PBRM1, DDX3X, IREB2, ZNF587, EXOC8, GLCCI1, TNRC6B, PDCD4, DOCK10, FNBP1, RASGRP1, SCRN1, UBXN4, TET1, ATF2, MEIS1, ATAD2B, ESYT2, STAT3, ATP11B, ITSN2, SFXN1, TPM1, RAPH1, POLR3B, SRSF11, OLR1, RAB11FIP2, SRPK2, BMPR2, TGFBR2, FILIP1L, UTRN, LONRF2, PAG1, NIPBL, C…	Up-regulated
624	HADDAD_B_LYMPHOCYTE_PROGENITOR_up	0.00864865	0.039465	0.26176	1.35336	23	262	TCF4, ENTPD4, PSD3, MEF2A, RB1CC1, CHST15, LAPTM5, MME, AKAP12, PLXNA1, GPM6B, CXCR4, NID2, ATM, PDS5B, BACH2, AEBP1, LEF1, AP1B1, PPM1A, DDX3Y, CEP135, TCL1B, SOCS2, PPP3CC, CITED2, COL5A1, VPREB3, RASGRP1, RBM6, ARHGEF7, TIA1, IRF4, LILRA2, ZFP36L1, HIP1R, ATAD2B, IL7R, EDEM1, SNX2, AK1, MPPED2, ZHX2, EFHC1, PLEKHF2, DACT1, ZFYVE16, SOD2, UGCG, MICU2, ITPR1, AUTS2, C6orf62, SLC35D1, CD22, ARID5…	Up-regulated
625	LI_INDUCED_T_TO_NATURAL_KILLER_up	0.00611154	0.0304625	0.257805	1.35001	15	299	SRGAP2, LGALS1, ARSB, ID2, GPR34, EVI2A, ERRFI1, TMEM154, PLCG2, EGR1, SCIMP, RGS1, GLIPR1, NEURL3, PLTP, FAM20A, SLAMF7, LTA, LRRC8C, DENND4A, EMP1, IFNG, AQP9, PPP3CC, S100A11, STX7, FTL, CLNK, SLC19A2, DYRK3, LASP1, FNBP1, XBP1, IQGAP2, STX11, CDKN1A, CAPZB, MYL6, TNFRSF18, MYO1E, HAVCR2, MVP, LY6H, NT5E, CHSY1, ASAH1, FCGR2A, PRDX4, SLC24A3, CD63, RBMS1, SAMD9L, CCR5, SGK1, KIT, GBP2, FOSL2, …	Up-regulated
626	UDAYAKUMAR_MED1_TARGETS_dn	0.0107229	0.0462904	0.265289	1.34929	30	230	LXN, SNAI2, PCDH7, ID2, RB1CC1, CAMSAP1, GABARAPL1, KCNN4, CLEC2B, PXDC1, JOSD1, KANK2, CBLB, ADAMTS1, INPPL1, PTTG1IP, COL1A1, RHOC, NGRN, RARA, PPP3CA, CITED2, HSPB8, EFCAB14, SLC2A3, TRIO, TUG1, DNAJB9, PLPP3, NR1D2, CDA, MEIS1, RIOK3, RSRP1, CDKN1A, CNPPD1, ST3GAL4, PIM1, BAMBI, TPM1, PLK2, RTN2, RGS2, WASL, PALLD, HSPBAP1, FOSL2, JUNB, ARID5B, GSN, TXNIP, PEA15, MAP7D1, TIMP3, TST	Up-regulated
627	CHYLA_CBFA2T3_TARGETS_up	0.0066778	0.0324215	0.243339	1.30574	15	371	RAB31, ALOX5AP, ZC2HC1A, IGSF6, TFEC, RNF180, STARD8, PLCG2, RHOQ, LAPTM5, SLAMF1, C1R, MAN1C1, PHF21A, ARHGDIB, HK3, CXCR4, BACE1, MAST4, FNDC3B, ARHGEF6, HLA-DQA1, ABCG1, ADGRL4, GRIA3, GOLGA5, SNX24, SELPLG, CD48, EMP1, PLEKHA2, GMFG, TM6SF1, LCP1, ANXA5, SOCS2, S100A11, ATP8B4, ATP13A2, SLC7A6, VPREB3, PAM, SPI1, CD300LG, GAS7, PTGS1, HOMER3, KRT80, CDA, HPSE, EPX, TLE6, GPR65, ERO1B, CELF2, …	Up-regulated
628	HATADA_METHYLATED_IN_LUNG_CANCER_up	0.0110114	0.0470822	0.243035	1.29478	26	350	COPZ2, MEDAG, LXN, GFPT2, ST6GAL2, COL1A2, SLAMF1, TAGLN, PIK3R5, ZCCHC24, NEFM, BCAT1, LHPP, ANGPTL2, ZNF626, SLC4A11, SH3D21, PLTP, NID2, GDI1, ARRDC3, ZFP69B, COL1A1, TRPV4, PYGO1, ADAMTSL4, TACR1, GTF2A1L, ZNF154, COL5A1, FBXO39, LIN28A, PAM, RASGRP1, DYSF, HTR5A, IRF4, LRFN5, SLC6A2, SULF2, PARP6, RGN, VAMP5, SEC31B, MMRN2, ZFP69, CYP27A1, HOXD3, ACTB, FGF4, MOS, PRDM8, ST6GALNAC3, FERD3L, P…	Up-regulated
629	KUMAR_TARGETS_OF_MLL_AF9_FUSION_up	0.00939368	0.0420091	0.239196	1.28895	21	386	RAB31, SRGAP2, POSTN, IFI16, PLS3, BASP1, THY1, INHBA, PLA2G4A, MBNL1, NAV1, MGP, CYP7B1, HIVEP2, RGS9, SFMBT2, C1R, RPS6KB2, VCAM1, ATG7, LHPP, ADAR, MMP9, TRIM5, ELOVL5, ATM, SIT1, PLET1, LEF1, LIMS1, VTA1, ZNF821, AQP9, SLC30A4, CITED2, ABHD14A, ANXA1, RAP1A, AKAP8, ARG2, CSNK1A1, IRF4, HOXA5, WFDC21P, EPX, MEIS1, GABBR1, C1QC, SH3GLB1, SERPINB4, IL7R, NAGLU, EYA2, LY6H, HDC, PLA2G7, HMX3, LHX…	Up-regulated
630	DEURIG_T_CELL_PROLYMPHOCYTIC_LEUKEMIA_up	0.00599441	0.0300794	-0.280697	-1.37038	44	337	TMEM97, CCNB1, SORD, MKI67, POLD2, FCGBP, PUS7, SORT1, SOX12, RAD54B, LYPLA1, NCAPG2, CYC1, LSM5, ADK, OPN3, RBBP8, TSPAN15, DGAT1, LILRA4, NEDD4L, SLC48A1, DKK1, PDE7B, MARCKSL1, HMGN5, ERBB3, A1CF, RAB25, RPL10L, CYB5A, PRKDC, MTAP, FAXDC2, GNA11, CYP2A6, TRIP13, METTL1, WDR62, CELSR2, IMPDH2, CPSF1, NCKIPSD, FXYD3, PFAS, GPD2, PTK2, CIC, BOP1, ATF3, NUP214, JAG2, PRIM2, GPR27, STXBP6, CXCL1, D…	Down-regulated
631	MCBRYAN_PUBERTAL_BREAST_4_5WK_up	0.00832986	0.0383225	-0.291572	-1.3852	59	259	GIPC2, EHF, POF1B, OCLN, MANSC1, RNF128, WFDC2, SPNS2, ST14, STARD10, SLPI, CD24, TTPA, TMEM30B, WDR43, MKRN1, SOX9, EPB41L4B, CEACAM1, FAAP20, IGFBP2, DSP, WNT2, PROM2, ATP1A1, MARCKSL1, FIP1L1, RPL5, PTPRK, ERBB3, RBP1, RAB25, CPT1A, LY6D, PREB, PROM1, KLF5, IMPDH2, CTSE, ADAMTS5, FXYD3, ZBTB8A, LAD1, NXN, PLAC8, MUC15, IRX1, SERPINB11, CSN1S2AP, GRHL2, CAPG, CLDN3, ABCC3, RPL36A, IRF6, FEN1, L…	Down-regulated
633	CAIRO_HEPATOBLASTOMA_up	0.00935772	0.0419319	-0.305086	-1.41048	65	204	GMNN, GORASP2, WFS1, PRKCA, FNBP1L, SMARCC1, CETN2, LGR5, TARBP1, RAB4A, HIP1, POLR1D, SAC3D1, GNPAT, AKR1C3, CPD, DKK1, FASN, MCM3, EHMT2, RBM12, HMGCS1, DLK1, SLC1A4, PRR15L, MLEC, PLAG1, NSDHL, HDAC2, SCD, AVL9, NCOA3, PDZK1, IMPDH2, RCOR3, SMYD3, FDFT1, PDGFA, CBX1, HMGCR, ZBTB38, CS, TOR3A, FKBP1B, CD24P4, ITGA6, CD46, PPP1CC, IGF2BP2, GPC3, RANGRF, TMEM243, RC3H2, SMARCA4, UBAP2, PFKM, CKB,…	Down-regulated
638	CHARAFE_BREAST_CANCER_LUMINAL_VS_BASAL_up	0.00145541	0.00998729	-0.290975	-1.42864	10	364	AGR2, SLC38A1, PLEKHH1, TFF3, CACNA1D, GSPT1, SBK1, WFS1, SOX12, STARD10, SHANK2, VIPR1, USP42, TIMM44, DENND1A, CERS6, TTC6, FTX, TCAF1, TFF1, LMCD1, VPS72, KDM4B, TSPAN15, F7, IVD, SPTLC2, GART, ERGIC1, SNX27, HMGCS2, CRNKL1, TC2N, SLC1A4, ERBB3, NEK5, DACH1, C7orf26, TBC1D16, FUS, C4orf19, AVL9, RALGPS1, DLG3, TMEM80, GPD1L, SPATA2L, CA12, ABHD11, ADGRB2, STRBP, KIAA0040, IRGQ, PPP1R16A, POLE,…	Down-regulated
639	REACTOME_HIV_INFECTION_up	0.00481041	0.0251522	-0.306019	-1.42917	33	223	NUP58, PSMA6, TAF7, KPNA1, NUP155, PSMB5, XRCC4, TAF5, PSMD7, NEDD4L, PSMD8, NELFA, PSMB3, NUP210, ATP6V1H, VPS37D, CCNT2, TAF4, SUPT4H1, BTRC, NUP153, VPS4B, SUPT16H, PSMA5, PSMF1, NUP93, RNMT, RBX1, NUP88, PSMB10, TAF7L, NUP54, POLR2G, NUP214, GTF2H4, PSMD13, AP1S1, MVB12A, NUP107, POLR2H, SLC25A5, CCNT1, PSMD14, FEN1, ERCC2, POLR2C, TAF6, CD8B, UBAP1, XRCC6, GTF2F1, NELFE, CD4, CHMP3, RANGAP1,…	Down-regulated
642	CHEMNITZ_RESPONSE_TO_PROSTAGLANDIN_E2_dn	0.0010518	0.00787728	-0.292793	-1.44071	7	371	CYB5B, GIPC2, SATB2, OCLN, TCAIM, WFDC2, BCL11A, ZMYND12, ST14, UBXN10, SLPI, C6orf132, NRXN3, GLUD1, ZBTB18, MACC1, GK5, OPN3, SPSB3, PDF, FLJ37453, MID1IP1, NSUN7, PRPSAP2, SPTLC2, BBS2, SMAGP, DAZAP2, LRPAP1, RBM47, PTPRK, PRR15L, VPS37D, GRHL1, NFATC2IP, OR7E14P, FUT3, NFIA, SLC24A1, PROM1, MAP7, ACSS2, KIF9, C12orf75, DSG2, ALDH3A2, MET, MUC3A, PRSS8, FOXP4, PSMA5, CDS1, RSPH3, SOSTDC1, LMTK…	Down-regulated
643	SANSOM_APC_MYC_TARGETS_up	0.00296108	0.0172404	-0.309794	-1.44949	20	227	DKC1, SRSF2, ZFP64, SMARCC1, VIPR1, COMMD9, RBKS, TAF7, TM9SF3, MDN1, WDR4, CDX2, MTHFD1, NME1, TMEM141, PSRC1, NELFA, MCM3, NPTX2, MED22, DNM1L, TELO2, DNMBP, NHP2, GEMIN5, ATL2, BIVM, SMPD4, SNRPF, IGF2, METTL1, SFXN2, WDR62, DDX49, IMPDH2, CTBS, ACER1, NUBP2, ACHE, IMPACT, BMP7, ATIC, FMR1, HNF1B, VPS51, NUB1, POLE, KNSTRN, INTS1, FHOD1, MYBBP1A, MCCC2, BDNF, EIF2AK3, FOXM1, SEMA4D	Down-regulated
644	OHGUCHI_LIVER_HNF4A_TARGETS_dn	0.00843023	0.0387048	-0.323153	-1.44973	57	161	CES3, DDC, MCM10, CLDN2, TKFC, AGMAT, TMEM30B, ASPDH, UGT2A3, CEACAM1, AQP8, SC5D, TLCD2, CIDEB, ASGR1, SULT2A1, ERBB3, SLC22A9, SLC23A1, ETHE1, AADAT, PDZK1, UGT2B4, VWCE, LIPC, SLC3A1, SULT1B1, GLYAT, TMC7, ABAT, SPATA2L, ABCC6, XYLB, MBL2, SRD5A1	Down-regulated
645	WANG_TUMOR_INVASIVENESS_up	0.00079187	0.00652274	-0.295381	-1.45155	5	366	CYCS, CKS1B, KIF20A, PTTG1, HINT1, HSPE1, FAF1, IPO5, DDX1, GLUD1, AMD1, EZH2, AIMP1, ABCE1, PSMG1, KPNA1, PPAN-P2RY11, MKRN1, SERBP1, HSPH1, POLR1D, DBI, MRPL57, PNP, POU2F3, TRIM28, COX7A2, YBX1, STAT1, FASN, ATP1A1, WDR89, RPL7, HMGCS1, HSPD1, RPL8, EIF4G2, ERGIC3, ACAT2, S100A6, NHP2, BTRC, KPNA2, CLEC4A, SRSF7, CCT2, WDR3, PCNA, ATP2A1, MOV10, RPS20, EIF2S2, EIF4H, ZNF780A, PAK1, B4GALT5, RB…	Down-regulated
646	NIKOLSKY_BREAST_CANCER_20Q12_Q13_AMPLICON_up	0.00931126	0.0417655	-0.331316	-1.4541	62	137	RNF114, ZFP64, SLPI, ZMYND8, CHRNA4, PFDN4, STX16, TOMM34, TAF4, SEMG2, ZNF512B, TUBB1, NCOA3, SPATA2, DOK5, KCNS1, DNAJC5, PI3, BMP7, PCK1, AURKA, NTSR1, PARD6B, LAMA5, ZBTB46, LKAAEAR1, KCNG1, RBPJL, VAPB, ARFGEF2, PTPN1, TP53TG5, PCMTD2, PTK6, MOCS3, GID8	Down-regulated
648	VANOEVELEN_MYOGENESIS_SIN3A_TARGETS_up	0.003386	0.0191817	-0.313659	-1.45825	23	212	PARPBP, NOP16, CKS1B, RNF114, RNF13, TBCA, MRPS33, HACD3, RAD51AP1, IDH3A, HAX1, UCHL3, RPSA, ZWILCH, MRPL57, NSUN3, PTDSS2, DCTD, ERGIC1, SUCLG2, OGFOD2, DPAGT1, TOMM34, ERGIC3, BTBD6, TXNRD1, GEMIN5, SLC7A6OS, C1orf131, DDX51, OLA1, CLCN3, MLYCD, HMOX1, AHCY, RALA, ING5, NOA1, MINK1, ZDHHC20, CHCHD4, BAZ1A, SLC39A3, PMS2, GPC5, C6orf226, PIK3IP1, ARHGAP33, NLN, TAC4, PTPN1, GTPBP2, RPS24, PBLD,…	Down-regulated
649	HSIAO_LIVER_SPECIFIC_GENES_up	0.00154364	0.0104074	-0.310622	-1.46275	10	241	MGST1, SORD, FABP1, ACSM3, GLUD1, CBS, GSTO1, ALDH2, GJB1, CYP3A4, MTHFD1, F7, ITIH1, PTGR1, SC5D, LGALS4, GPT, ASGR1, HMGCS2, SULT2A1, SUPT4H1, CYB5A, ASS1, HMGCL, G6PC, ABCB4, UGT2B4, CYP2A6, IGFBP1, APOH, NR1H4, ORM1, LIPC, CRP, TTR, CYP2C18, DDT, CASC3, APOA1, UGT2B15, PCK1, ABCC6, MGST2, SEPHS2, FGG, MBL2, PCBD1, HAL, MSMO1, BHMT, ITIH3, TAF6, CYP4A11, HSD17B4, ABCC2, TM4SF4, HP, GSTA2, CYP2…	Down-regulated
653	MEISSNER_BRAIN_HCP_WITH_H3K27ME3_up	0.00151997	0.010304	-0.308395	-1.46852	10	264	PLBD1, TMEM171, HOXA13, CYP4F22, WNT7B, TMEM30B, CDX2, POU2F3, BCL3, PROM2, GBX1, MARCKSL1, PCSK9, DLK1, MESP1, RAX, CDX1, HES2, FAM89A, HMX2, CRB3, IGF2, REM1, ZNRF4, MFSD6L, PITX1, CYP26A1, COL13A1, PLEKHG6, WDR86, PKP1, ONECUT3, FOXA2, TMEM54, HMX1, TBX1, FOXD2, DRGX, GRIN3B, HNF1B, SLC18A2, OLIG3, B3GNT3, CLDN3, IGF2BP3, IRF6, SPINT1, CALCR, NPAS1, BARHL1, HOXB5, IRX2, B4GALNT2, THEM7P, TLX1,…	Down-regulated
654	RICKMAN_TUMOR_DIFFERENTIATED_WELL_VS_POORLY_up	0.00197128	0.0125117	-0.313749	-1.46966	13	229	TMEM97, RMI2, CENPF, SBK1, LBR, TMPO, UBE2T, BCL11A, CHPT1, ALDH2, TARBP1, RPIA, FBL, PTCH1, MCM3, RPL5, VARS2, SRSF7, SFXN2, MAN2A2, MAP2K6, TMEM70, IRF2BP2, CAPS, TRAF5, SLC45A4, ZNF180, RPS7, LIPT1, HNRNPU, SNRPE, CCT7, RABL2B, ZNF764, MECOM, CENPV, OGT, ZNF704, BTN2A2, SEMA6A, RBM39, TGIF2, GTF3A, CD8B, MSI2, CEP70, FARP1, TGS1, ZNF251, LRP6, SIM2, CCDC74A, GFPT1, RPL23, LTB, ATP2C1, GCFC2, O…	Down-regulated
655	BHAT_ESR1_TARGETS_VIA_AKT1_up	0.00233645	0.0143028	-0.307574	-1.47109	16	274	PLEKHH1, GINS2, UNC5A, WFS1, XRCC3, CDC6, CYP4F22, RRP12, PPARGC1B, IFRD1, POP1, SLC29A1, NOLC1, KDM4B, FGFRL1, NUDC, LETM1, KRT15, OVOL2, SLC1A4, OSGIN1, FHL2, SLC7A5, PAK4, TBC1D16, PADI3, PDZK1, NOP14, CELSR2, DOK7, VGF, PITX1, CYP26A1, MED24, MRPS17, ATF3, AATF, CA12, JADE2, RUVBL1, BRD9, KHK, TH, GFOD1, UBIAD1, DEGS2, FAM102A, IER5L, ADAP1, BCL11B, TMEM120B, KRT13, SVIL, TFF2, SCARB1, MYBBP1…	Down-regulated
656	BILD_E2F3_ONCOGENIC_SIGNATURE_up	0.00181742	0.0116842	-0.313365	-1.47286	12	235	TMEM97, FERMT1, SBK1, BRI3BP, SOX12, NCR3LG1, TFDP1, C6orf136, RAB15, EZH2, NUP155, EPB41L4B, MDN1, KDM4B, FGFR3, SAC3D1, LIN7B, UGT8, PTCH1, LYPD6, JPH1, CDKN2C, TAF4, POLE2, ZNF483, CDKN2A, SLC35G1, MFHAS1, SRSF7, PCNA, CAMK2N1, FAM222A, RASEF, NCKIPSD, IL17RB, E2F7, ENO2, CIZ1, PLCL2, PUM3, GAS5, ADGRB2, CCP110, GPR27, CCNE2, POLE, FEN1, RIPPLY3, BCOR, SCN8A, TSHZ1, PXMP2	Down-regulated
657	WP_VITAMIN_D_RECEPTOR_PATHWAY_up	0.00489631	0.0254824	-0.324277	-1.47394	33	180	TNFRSF11B, NOX1, HNF1A, CDKN2D, CLDN2, CYP3A5, CBS, CA9, CYP3A4, CEACAM1, CDX2, LCE2B, SULT2A1, S100G, CDKN2C, S100A6, ID1, CDKN2A, CAMP, CYP1A1, LRRC25, LCE1D, KL, SERPINB1, IGFBP1, TRPV5, ORM1, COLEC11, SOSTDC1, ADAMTS5, LRP5, COL13A1, FGF23, ALPI, SLC8A1, MED9, IGSF9B	Down-regulated
660	FARMER_BREAST_CANCER_APOCRINE_VS_BASAL_up	0.000672405	0.00597826	-0.304988	-1.4813	4	319	ERLIN2, SLC38A1, MELK, MKI67, LBR, KIF20A, UBE2C, BCL11A, GALNT7, HACD3, CERS6, FABP5, E2F3, TOP2A, ZMYND8, STOML2, RBBP8, ZWILCH, NRAS, KDM4B, FBL, CEP55, TRAK2, DBI, ETFA, PFDN4, TAF5, SPTLC2, SC5D, FASN, FAM216A, HMGCS2, RBM47, PRR15L, S100A6, PDCD5, CYB5A, CDKN2A, CYP4F8, SCD, PROM1, P4HA1, ENOSF1, KLF5, PREP, LIMCH1, PON2, KIF23, CTBS, APOBEC3A, SLC22A18, UGT2B11, NUP88, LDHB, GPD1L, C1QBP, …	Down-regulated
666	HOSHIDA_LIVER_CANCER_SURVIVAL_dn	0.00852878	0.0390373	-0.355423	-1.50263	55	108	TMEM97, RRM1, SRSF2, HSPE1, PTPN18, ACSM3, GJB1, ZBTB17, SC5D, ZER1, PSMB3, NARS2, CYB5A, HMGCL, RAD52, RPS6KA5, LIPC, CTBS, TTR, CCT8, PCK1, MPC2, ADRA2B, HMGCR, SLC4A4, CALCR, CPOX, SELENBP1, GCKR, SNX10, GSTM1, ATP2C1, AOX1, SLC37A4, BAIAP2, ANKRD46, EMD, TM7SF2, HAAO, ALDH9A1	Down-regulated
668	DARWICHE_PAPILLOMA_PROGRESSION_RISK_up	0.0117334	0.0495079	-0.379289	-1.51122	74	76	EGLN3, GPR37, PTX4, TRBV11-3, MUC2, CLYBL, MFAP3L, ACTL6B, MAN2A2, ABHD14B, CD2AP, CXCL16, GGT7, TEX26, TMOD1, NEK4, NUDT12, CRKL, GSTM1, PRRT1, NR6A1, LAG3, ATG2A, IQCF1, RELN, XDH, LGALS2, ZSCAN2, SLC38A10, MORN5, UCK2, XPC, GSDMC, SERPINH1	Down-regulated
676	LEIN_OLIGODENDROCYTE_MARKERS_up	0.00930013	0.0417574	-0.385625	-1.5259	58	74	TMEM63A, RNF13, GPR37, ANLN, FABP5, MTRR, GJB1, UGT8, SLC48A1, TMEM88B, OMG, HMGCS1, QDPR, SERPINB1, SCD, MAP2K6, PLEKHG3, CCP110, SERINC5, SOX10, CERS2, NRBP2, HCN2, CNTN2, MBP	Down-regulated
678	SCHUETZ_BREAST_CANCER_DUCTAL_INVASIVE_dn	0.00890347	0.0402755	-0.377477	-1.53056	56	84	WFS1, SORT1, GALNT7, SHANK2, HOOK1, OPN3, ZNF750, LETM1, RAB11FIP1, SLC1A4, ERBB3, PROM1, CELSR2, ABAT, ABHD11, CADPS2, GRAMD1C, KIAA0040, CLDN3, CD24P4, EPN3, AREG, GRB14, ANXA9, LAMA3, IL20RA, TMED5, ZDHHC11, MRPS30, IER5	Down-regulated
682	RODWELL_AGING_KIDNEY_NO_BLOOD_dn	0.0038382	0.0212569	-0.349124	-1.53454	25	138	ERLIN2, GMNN, CYCS, TOX3, TSPAN7, LRPPRC, SHANK2, UCHL5, PRDX3, GATB, PTGR1, NEDD4L, SRP9, CYB5A, ENOSF1, DSG2, B4GALNT3, RALGPS1, COX6C, DHTKD1, TMEM80, LDHB, IMPACT, BMP7, MTO1, TCTN3, HSPA9, CSNK2A1, OAT, PHYH, WDR61, AMT, ATXN7L3B, CEP70, GOT2, APLP2, CCNB1IP1, AHCYL1, CRABP1, SCML1, NUDT7, SLC25A36	Down-regulated
685	VANTVEER_BREAST_CANCER_ESR1_dn	0.000845904	0.00674942	-0.330599	-1.54028	5	217	MELK, HJURP, UQCRH, RNF114, BCL11A, ST14, ANLN, AMD1, IMPA2, NFKBIE, CA9, IFRD1, PSMG1, UCHL3, NCAPD2, SERBP1, TRIM29, MYBL2, CEP55, CDCA8, UGT8, GMPS, YBX1, BUB1, TBPL1, RAD54L, TTK, ATL3, PDCD5, ST8SIA1, CEBPG, C1orf112, ASS1, RSRC1, SRSF7, CYBA, ATAD3A, PROM1, PSAT1, VGLL1, LDHB, LAD1, ODC1, PKP1, GPRIN2, MALL, HDGF, BLM, PRIM2	Down-regulated
688	REACTOME_GLUCOSE_METABOLISM_up	0.00762171	0.0356875	-0.37611	-1.54337	48	90	SLC25A13, NUP58, GOT1, ADPGK, NUP155, PFKFB2, HK1, PPP2R1A, NUP210, NUP153, GCK, G6PC, GPI, NUP93, NUP88, ENO2, NUP54, PCK1, NUP214, TPI1, NUP107, G6PC3, SLC37A1, GOT2, GCKR, SLC25A1, PGAM1, PFKM, PGK2, SLC37A4, NDC1, PFKL, PRKACG, PCK2, PFKP, SLC25A12, NUP62, GNPDA2, SLC37A2, ENO3, GNPDA1	Down-regulated
689	ONDER_CDH1_TARGETS_1_dn	0.00188953	0.0120957	-0.344515	-1.54556	12	161	EHF, CHRNA5, TMPO, TIPIN, MCM10, CDC6, SRSF2, SMARCC1, POP1, BRCA2, SOX9, TSEN2, UMPS, HSPH1, BRIP1, DKK1, KRT15, HBEGF, IMP3, RBM12, HMGCS1, ZNF365, DDX52, MYO5C, S100A7, SERPINB1, UTP20, VGLL1, PI3, BCLAF1, HNRNPU, RRS1, PTGS2, HCCS, SLC16A1, CXCL1, CCNE2, CWH43, KRT13, FEN1, LCN2, GPRC5A, HNRNPM, ILF3, CBFB, ALG13, EIF5, ST6GALNAC5, EPN3, TOE1	Down-regulated
699	YAO_TEMPORAL_RESPONSE_TO_PROGESTERONE_CLUSTER_13_up	0.00189394	0.0121066	-0.348523	-1.56216	12	160	COA6, CYB5B, NDUFA5, MRPS33, PMPCB, PSMA6, MRPL52, PRPSAP2, DBI, NDUFA9, NDUFV3, CETN3, S100A6, PDCD5, LAMTOR5, MRPL11, LSM3, ESD, CYBA, PSAT1, ILVBL, CHRAC1, PSMA5, SNRPG, UQCRB, MRPL18, DPM3, SNRPE, SEC61G, COX5B, GPN1, PIGX, EMC6, BUD31, EBP, NDUFB11, CD320, NAB1, LYRM2, PPIB, SNX10, PPP2R5C, FKBP3, GSR, MRPL27, DGCR6L, COX6A1, TSEN34, NCBP2, UQCRC2, NDUFB5, RBM14-RBM4, PSME2, TCF19, SF3B5, PP…	Down-regulated
701	HOSHIDA_LIVER_CANCER_SUBCLASS_S2_up	0.0040841	0.0223724	-0.367731	-1.56666	26	113	LBR, DDX1, SMARCC1, GLUD1, PRDX3, PPARG, TARBP1, RAB4A, CSE1L, FBL, FGFR3, CPD, PPP2R1A, ERBB3, NUP153, RPS25, IGF2, AHCY, CASC3, BCLAF1, HNRNPU, SNRPE, HMGCR, CSNK2A1, HNRNPA2B1, CUL4A, EP300, TIAL1, KLF3, RBM39, RPS5, CD46, GPC3	Down-regulated
702	VANHARANTA_UTERINE_FIBROID_WITH_7Q_DELETION_up	0.0068515	0.0330836	-0.406737	-1.57115	42	65	TMPO, ZFP64, NAA16, CSE1L, U2AF1, TBPL1, CARS2, RBBP7, TRMT61B, DDX10, RAD51C, EMC6, TSC22D2, EMG1, TRAPPC2, FARP1, HIC2, RUVBL2, PTP4A1, SMARCA4, EIF5B, PAPOLA, TIMM9, NPRL2, TCEA1, UBR7, VEZT, TMEM231, VEZF1	Down-regulated
704	KARLSSON_TGFB1_TARGETS_up	0.00317749	0.0182491	-0.36756	-1.57383	20	118	DDX21, CYCS, HSPE1, IPO5, PPA1, IDH3A, ABCE1, UCHL3, NOLC1, HSPH1, GNL3, HSPD1, SALL1, EIF5A, CCT2, ESD, LYAR, EIF2S2, PREP, RPF2, PTK2, CCT8, GEMIN6, SLC8A1, EEF1E1, GJB3, PUM3, HSPA9, WDR75, SLC25A5, MYBBP1A, BAZ1A, TCP1, NIP7, EIF5, PTP4A1, EIF3A, EIF3B, RSL1D1, EIF2S1, GADD45G, USP10, REPS2	Down-regulated
707	MEISSNER_NPC_HCP_WITH_H3K4ME3_AND_H3K27ME3_up	0.00206551	0.0129811	-0.358509	-1.58027	13	141	MYO1D, CHRNA5, ARHGAP44, UNC5A, ATOH1, CAMKK1, RAB15, COCH, CWC22, JPH1, ERBB3, FHL2, PLAG1, KCNJ4, ATOH8, NRARP, STK32C, B4GALNT3, TMTC4, ADAMTS8, CDS1, PLEKHG3, VGF, CLDN23, KLHDC8A, ADRA2B, GRM8, ESRRB, RASGEF1B, NXPH4, VSTM2B, MAP3K9, ABLIM2, EFCC1, SLC35D3, FGF19, GPC5, IGF2BP2	Down-regulated
708	YAMAZAKI_TCEB3_TARGETS_dn	0.000428571	0.00464248	-0.344786	-1.58255	2	193	AGR2, AHSA1, LBR, KIF20A, CKS2, SLC25A13, IPO5, ZMYM1, TOP2A, ALDH2, SERBP1, STOML2, MYBL2, MDN1, IGFBP2, YBX1, PTCH1, PSRC1, HMGCS1, TCF7, S100A6, CLYBL, KPNA2, MTF2, CYBA, CPSF4L, DSG2, IGF2, ALDH7A1, LDHB, ESCO2, FDFT1, SEPHS2, STRBP, PHYH, AURKA, TUBA1B, AKTIP, CDH1, MCCC2, FAM122B, GSTM1, CLDN4, RUVBL2, PHB, CUL2, CCNE1, FKBP3, CRABP1, SAP30, CKB, CDKN1C, TTC39B, RFC5, CPEB1, CDCA7L, FZD5	Down-regulated
716	MAYBURD_RESPONSE_TO_L663536_dn	0.00739669	0.0350365	-0.431147	-1.59498	45	52	LAPTM4B, CYCS, ADPGK, AMD1, HMGB1, KPNA1, NOLC1, HSDL2, CSTF3, SRSF7, TMTC4	Down-regulated
717	FONTAINE_PAPILLARY_THYROID_CARCINOMA_up	0.00524392	0.0268242	-0.411808	-1.59596	32	66	COX15, SLPI, GATB, TMEM45B, NELFA, CAPN3, S100A6, KPNA2, FUS, PSAT1, IL19, SNRPG, SLC22A18, HSPB7, CD47, TESC, VTI1A, ABCC3, IGF2BP2, NOTCH1, KRT18, ETV4, CD4, CCNE1	Down-regulated
718	PANGAS_TUMOR_SUPPRESSION_BY_SMAD1_AND_SMAD5_dn	0.00192109	0.0122452	-0.364199	-1.59716	12	136	PLEKHH1, LBR, WFS1, TMEM185B, CNTF, ELOVL6, FGFRL1, IGFBP2, GSTK1, BORA, YBX1, ATP1A1, TOM1L1, ID1, DNAJC10, ICAM4, MFAP3L, TOX, SRSF7, SCD, SUPT16H, NPR2, ASTN1, HAUS7, GPD2, ZSWIM7, FDFT1, SLC16A1, MRPS21, KNSTRN, DAB1, MAGEA13P, C11orf24, LRP11, FAM234A, PTBP3, SDF2L1, ZDHHC2	Down-regulated
719	LASTOWSKA_NEUROBLASTOMA_COPY_NUMBER_up	0.000434342	0.00465619	-0.353907	-1.60029	2	173	TMEM97, PRR11, CDC6, POLG2, SRSF2, ARL16, BRCA1, MED13, TOP2A, SLC25A19, NTN1, NME1, BRIP1, ASGR1, RFFL, AKAP1, SUPT4H1, TRAPPC1, EFCAB13, CEP95, DCAF7, MKS1, KPNA2, TK1, EIF4A3, UTP6, ALDH3A2, NOL11, DHX57, SMURF2, CTDNEP1, HEXIM1, ICAM2, MED9, KHK, HCRT, CBX2, ARMC7, MINK1, RAD51C, ABCC3, MRPL10, GEN1, GJC1, MSI2, ACBD4, PHB, RPL23, ETV4, MRPL27, KRTAP4-8, RNF135, HEATR6, BIRC6, TIMM22, WIPF2, …	Down-regulated
721	REACTOME_BIOLOGICAL_OXIDATIONS_up	0.000425351	0.00464248	-0.346505	-1.60197	2	204	CYB5B, CES3, MGST1, GSS, UGT1A1, CYP4F22, CYP39A1, CYP3A5, GSTO1, UGT2A3, MTRR, ALDH2, GGCT, CYP3A4, TBXAS1, GSTK1, ADH1C, SULT2A1, CYP1A1, SULT4A1, CMBL, CYP4F8, ESD, ACSS2, UGT2B4, CYP2A6, ACSM5, NR1H4, ABHD14B, POMC, SULT1B1, GLYAT, CYP26A1, UGT2B11, CYP2C18, AHCY, CHAC1, UGT2B15, MGST2, GGT7, SLC35B3, AKR7A3, ACY3, CYP2S1, CYP21A2, ACSM2A, CYP4A11, ACSM4, GLYATL1, UGT3A2, GSTA2, PAPSS2, CYP2J…	Down-regulated
723	GROSS_HYPOXIA_VIA_HIF1A_up	0.00394073	0.0217201	-0.405667	-1.60521	24	74	DDX21, NOP58, HACD3, ACSL5, USP42, AMD1, RCC2, PSMB5, GART, RPL5, HSPD1, SLC1A4, PPID, KPNA2, SRSF7, UBE4B, NOP56, IMPACT	Down-regulated
727	SWEET_KRAS_TARGETS_dn	0.0054166	0.0276444	-0.41845	-1.61022	33	63	PDE4C, EPHB3, LBR, RNF6, WNT2, DKK1, PARD6A, TEP1, MLX, UPP1, PTMA, TMPRSS11D, ODC1, MALL, PDZD3, PARD6B, CRISP1	Down-regulated
729	CHIANG_LIVER_CANCER_SUBCLASS_UNANNOTATED_dn	0.000576037	0.00530025	-0.354837	-1.61284	3	180	TPX2, GMNN, UBE2T, RAD51AP1, CDKN3, IMPA2, SCAMP3, PSMG1, SLC29A1, STOML2, DBI, YBX1, PSMD8, ATP1A1, RFC4, FUCA2, HNRNPA0, POLE2, LAMTOR5, NEU1, C1orf112, CCT2, PCNA, RPA3, ZNHIT3, EBPL, PSMA5, NDUFA4, EPDR1, MRPL44, STIP1, C1QBP, LSM2, ATIC, WDR61, SLC25A5, MAPRE1, CLNS1A, TYMS, FEN1, CD46, TPRKB, GPR160, CCNB2, ME2, ALG13, SPOPL, SLC44A3, E2F5, PPIL1, HSPA13, TSPAN6, RAN, FARSA, RFC5, UQCRFS1, …	Down-regulated
731	ACEVEDO_NORMAL_TISSUE_ADJACENT_TO_LIVER_TUMOR_dn	0.000133333	0.00422266	-0.330935	-1.61466	0	335	CYB5B, TMEM97, TFF3, CYP39A1, STARD10, CLDN2, GLUD1, FOXD4L4, CBS, AGMAT, CERS6, KPNA1, SERBP1, TGDS, EIF2AK1, IDNK, FGFRL1, DGAT2, SDHB, DGAT1, PNP, ZNF511, MLLT3, FASN, HMGCS1, ACAT2, GPT2, NSDHL, RNPEP, SLC7A5, TBC1D16, RPS25, SCD, SNRPF, REEP6, HPS6, KCTD5, TNIP2, TRIB1, ABHD14B, DHRS7, PSMF1, CPSF1, ALDH7A1, DNAJB11, SLC50A1, LRP5, ALG9, SNRNP25, AHCY, ZNF180, RAB3GAP2, NUDT5, COX5B, HMGCR, …	Down-regulated
732	GAZDA_DIAMOND_BLACKFAN_ANEMIA_PROGENITOR_dn	0.00383019	0.0212415	-0.419248	-1.61533	23	64	LYPLA1, CASP6, FABP5, LSM5, ADK, RAB4A, BRCA2, OXLD1, PFDN4, R3HDM4, HSDL2, HELLS, PRKDC, NOP56, IMPACT, NUP54, NUCB2, PXMP2, MAGT1, PDZD8, CCT6A, SMARCA4	Down-regulated
739	PAL_PRMT5_TARGETS_up	0.000284981	0.00422266	-0.353288	-1.62367	1	195	GMNN, MKI67, CKS1B, NOP58, TMPO, CKS2, RRM1, SLIRP, AMD1, APEX1, CETN2, MRPL48, PSMB5, SLBP, PNP, ARGLU1, IVD, NME1, MRPL20, EHMT2, TTK, CETN3, AURKB, HELLS, PTPRK, INTS8, EIF4G2, POLE2, CPT1A, KPNA2, CSTF3, LSM3, MET, TRIP13, CHRAC1, KIF23, PRIM1, ZNF624, NUP88, AURKAIP1, ODC1, STMN1, AHCY, LSM2, MRPL18, PRELID1, FMR1, FOXG1, PRIM2, MRPS21, CAPG, EMC6, TYMS, CLCN4, UBE2M, CTPS2, NDE1, CDC25C, TO…	Down-regulated
740	WANG_SMARCE1_TARGETS_dn	0.000131683	0.00422266	-0.330857	-1.62745	0	370	CYB5B, TNFRSF11B, GLRX2, NOP16, EXOSC8, NDUFAB1, LBR, MIOS, RNF6, GALNT7, SMC3, HSPA4L, NUP58, MRS2, EIF4E, TFDP1, LYPLA1, VRK1, UCHL5, IDH3A, SLC25A37, MICA, PRDX3, AIMP1, ABCE1, COX5A, LSM5, ELOVL6, SLC29A1, CSE1L, OPN3, HSPH1, PDF, NUDC, SLBP, SDHB, NCAPG, BOLA2, SAC3D1, ARGLU1, NTN4, GNL3, DLEU2, FAM216A, POLR3G, HMGCS1, FIP1L1, PDCD5, QDPR, NSMCE4A, CSTF3, HS3ST1, MTAP, VPS4B, ATAD3A, PDHA1,…	Down-regulated
741	PRAMOONJAGO_SOX4_TARGETS_dn	0.00550162	0.0279827	-0.451037	-1.62825	33	47	LAPTM4B, TMEM97, CCNB1, KIF20A, FAHD2A, CDKN3, PTBP1, MLEC, HNRNPA0, ADAM15, LSM2, SPINK5	Down-regulated
743	FARMER_BREAST_CANCER_BASAL_VS_LULMINAL_up	0.000134662	0.00422266	-0.335877	-1.63065	0	318	AGR2, TPX2, MELK, TFF3, LBR, WFS1, MCM10, PTTG1, DKC1, BCL11A, GALNT7, SLC9A6, RAD51AP1, AMD1, CERS6, IFRD1, FABP5, E2F3, MPP6, TFF1, TRIM29, KDM4B, CPD, SPTLC2, UGT8, GMPS, YBX1, NFE2L3, BUB1, FASN, TOM1L1, TTK, RBM47, BBOF1, PRR15L, MTHFD2, ST8SIA1, CEBPG, CDKN2A, DACH1, HS3ST1, KIF4A, MYO5C, HDAC2, PDZK1, VGLL1, KLF5, SYNC, DHRS7, TRIM2, SLC22A18, PI3, LDHB, GPD1L, ABAT, PKP1, CA12, PUM3, MICA…	Down-regulated
746	FISCHER_G1_S_CELL_CYCLE_up	0.00043153	0.00464248	-0.361256	-1.63829	2	176	ANK3, GMNN, GINS2, EXO1, TIPIN, MCM10, CDC6, EZH2, BRCA1, E2F8, RBBP8, SLBP, CDCA7, ARGLU1, BRIP1, WDHD1, MCM3, MASTL, RFC4, HELLS, POLE2, TXNRD1, CHAF1B, PCNA, KLF5, WDR76, MAP2K6, PRIM1, MBNL2, BARD1, E2F7, SP1, C1GALT1, FANCE, NCOA7, PTGS2, BLM, CCNE2, POLE, DLGAP1, LIPH, UNG, FEN1, OGT, CDH24, CHAF1A, TOPBP1, PEX13, DSCC1, TMEM243, PLCXD1, YEATS4, CHEK1, RABIF, CCNE1, MDM1, TENM3, CDC7, NUDT7…	Down-regulated
749	PROVENZANI_METASTASIS_up	0.000432028	0.00464248	-0.360555	-1.64005	2	181	TFF3, GALNT7, TOX3, SF3B3, IPO5, PPA1, EZH2, TXNL4B, LSM7, ADK, GPX2, LMCD1, PDF, PLLP, AKR1C3, BORA, PSMD7, EPHB2, DAZAP2, MCM3, MARCKSL1, RBM47, CDKN2C, TMEM208, CDKN2A, COPZ1, MTF2, PROM1, CENPN, ACD, BTF3, MET, PDIA4, PRIM1, CMC2, TRAF5, FOXA2, CTCF, PLAC8, TESC, CADPS2, FZD10, WDR59, CUL4A, TOR3A, NIP7, MCCC2, CD24P4, GOT2, CBFB, MFNG, AQP3, DDX50, GLG1, HNRNPF, EIF4B, WWOX	Down-regulated
753	SENGUPTA_NASOPHARYNGEAL_CARCINOMA_dn	0.00013328	0.00422266	-0.337077	-1.64286	0	329	AGR2, PIGR, MYO1D, TFF3, ABLIM1, WFDC2, ZMYND12, TOX3, UBXN10, SLPI, IMPA2, CETN2, EPB41L4B, TCEA3, AKR1C3, PTGR1, TLCD2, PAX5, TMEM45B, MUC13, ADH1C, OMG, BBOF1, NEK5, ASS1, MS4A8, DNAI1, DUOX1, PROM1, EFCAB2, PPIL6, SMIM22, ABHD14B, FUT2, SPATA18, RSPH3, RSPH9, FANK1, CAPS, CLDN23, SLC22A16, PI3, ST6GALNAC1, EFCAB1, RIBC2, RALGPS2, S100P, CXCL1, CRYL1, ADIRF, MUC1, LCN2, FBXO15, IFT172, LRP11, …	Down-regulated
756	WATANABE_RECTAL_CANCER_RADIOTHERAPY_RESPONSIVE_up	0.00198201	0.0125443	-0.391031	-1.64861	12	106	CYB5B, TMEM63A, RRM1, CFTR, IMPA2, GPX2, DDX27, NUDC, PDXDC1, RPL13, ATP1A1, NELFA, PPID, UBE4B, PROM1, CNOT1, PIP5K1B, VAMP7, ADGRG1, MPST, PCK1, PRKCD, NDUFS6, IDH3G, RPL36A, DHX15, CDH1, CD24P4, COASY, REG1B, SLC35A3, CFB, TRIM33	Down-regulated
760	HUANG_DASATINIB_RESISTANCE_dn	0.00237417	0.0144941	-0.423636	-1.65473	14	69	SLC38A1, PLEKHH1, SBK1, STARD10, CERS6, CHPT1, DNPH1, YME1L1, TFF1, IGFBP2, PLCH1, CRNKL1, JPH1, CCDC58, GPD1L, CA12, ABHD11, DEGS2, CLDN3, SCARB1, MYEF2	Down-regulated
763	BLANCO_MELO_RESPIRATORY_SYNCYTIAL_VIRUS_INFECTION_A594_CELLS_dn	0.00197839	0.0125391	-0.39217	-1.66113	12	109	MMP28, EPHB3, DDC, CCDC34, FCGBP, CLDN2, USH1C, RAP1GAP, FGFR3, KSR2, SLC23A1, MYO1A, APOH, ANKS4B, TM4SF20, SLC3A1, SLC29A4, CAPS, IL17RB, CDH17, RIBC2, HNF1A-AS1, AKR1C2, DEGS2, ABHD1, MUC5B, CLDN3, TYMSOS, NEURL1B, AQP3, GPR162, LTB, MCF2L, AMBP, ANXA9, CYP4F12	Down-regulated
765	GUO_TARGETS_OF_IRS1_AND_IRS2_up	0.00216651	0.0134462	-0.402303	-1.66255	13	94	DKC1, PPARGC1B, CASP6, HSPH1, SC5D, BCL3, PDE7B, PCSK9, ACAT2, DHCR7, CPT1A, NSDHL, FUS, GCK, G6PC, ABCB4, IGFBP1, PPARGC1A, FDFT1, PCK1, HMGCR, GFRA1, SCARB1, MSMO1, RBM39, PCBP4, TM4SF4, NR1I2, MOGS, NFE2, ELK4, GRN, NUDT7, PITPNC1, CACYBP, AGTR1, ABCG8, CYP51A1, ABCG5, TUBB4B, TNFRSF1B, CTSV, INSR	Down-regulated
768	WATANABE_COLON_CANCER_MSI_VS_MSS_dn	0.00223072	0.0138255	-0.431948	-1.66854	13	65	SPINK1, OLFM4, CDHR1, FABP1, CFTR, CADPS, HMGCS2, A1CF, DACH1, IGF2, GNG4, DUOX2, MUC12, GRM8, MGC32805, ISX, MYEF2, KRT20, SLC35D3, ZMYM2	Down-regulated
769	ZAMORA_NOS2_TARGETS_up	0.00320154	0.0182986	-0.448024	-1.66944	19	54	RRM1, PPA1, IFRD1, RPSA, HSPH1, POLR1D, PNP, IL1RN, SUPT4H1, PCNA, RBBP7, ZNF780A, HMOX1, SMS, TYMS, FEN1, CSN3, GTF2F1, NELFE, CCNE1, GH1, RAN, HMGB2, NGF, ATP6V1C1, RAC1, EIF4E2, ACLY, PDCD2, STAM, APRT, MCM5, MCM4, MCM2	Down-regulated
775	GOLUB_ALL_VS_AML_up	0.010185	0.0447442	-0.539685	-1.67293	59	24	PSMA6, MCM3, SRP9, ZNF22, NUP88, STMN1, CBX1, TOP2B, SMARCA4, ATP2A3, RBBP4, CYFIP2, IRF2, MYB	Down-regulated
778	WHITE_NEUROBLASTOMA_WITH_1P36.3_DELETION_up	0.0102775	0.0449741	-0.572662	-1.67597	59	19	TAS1R1, RNF207, CHD5, HES2, GPR153, DNAJC11, KCNAB2	Down-regulated
779	REACTOME_PERK_REGULATES_GENE_EXPRESSION_up	0.00631439	0.0313342	-0.504086	-1.67621	37	32	EXOSC8, PARN, CEBPG, EXOSC4, DDIT3, EIF2S2, IGFBP1, ATF3, KHSRP, EIF2AK3, EXOSC3, EIF2S1	Down-regulated
783	LEE_LIVER_CANCER_MYC_TGFA_up	0.00208467	0.0130799	-0.443274	-1.6793	12	59	GIPC2, TFF3, CYP39A1, SLPI, CBR1, RALB, PSRC1, SLC1A4, MTHFD2, LY6D, IGF2, IGFBP1, VIL1, MGMT, LCN2, SLC13A3, HTATIP2, CSN3, GSTM1, TUBGCP4, RPS24	Down-regulated
784	LIU_PROSTATE_CANCER_up	0.00216651	0.0134462	-0.406401	-1.67948	13	94	SNORD60, GALNT7, ST14, LYPLA1, DNPH1, GJB1, GGCT, SOX9, EIF2AK1, RAP1GAP, MARCKSL1, MTHFD2, DANCR, OR51E2, TRIB1, TMEM161A, TMTC4, MAP2K6, ABCC4, VSTM2L, GLYATL1, FARP1, BZW2, TSPAN13, HPN, SIM2, RNF41, GADD45G, TBC1D4, REPS2, FLJ20021, GMDS, CANT1, C9orf152, ELK1, PYCR1, RAB17, ENTPD6, BEND4, PPP1R14B, CAMKK2, APRT, RAB3D, PTRHD1, IMPA1	Down-regulated
788	HESS_TARGETS_OF_HOXA9_AND_MEIS1_up	0.00174936	0.0114164	-0.432856	-1.68207	10	67	NOP58, RRM1, GOT1, GLUD1, FABP5, PPAN-P2RY11, MYBL2, NOLC1, DTYMK, MUC13, MCM3, PPID, HDAC2, TRIP13, ODC1, C1QBP, RUVBL1, ICAM2, GAS5, RRS1, HMGCR, CLDN15, NUCB2	Down-regulated
792	REACTOME_TRANSCRIPTIONAL_REGULATION_BY_TP53_up	0.000132802	0.00422266	-0.344236	-1.68466	0	349	TPX2, RMI2, CCNB1, CYCS, EXO1, PHF20, LRPPRC, TFDP1, CASP6, BRCA1, TAF7, MLH1, COX5A, E2F8, GPX2, RBBP8, CENPJ, TAF5, BRIP1, MLST8, NELFA, EHMT2, MBD3, RFFL, PPP2R1A, RFC4, AURKB, CCNT2, TAF4, SUPT4H1, LAMTOR5, CDKN2A, CDK5, TXNRD1, RRAGC, HDAC2, PCNA, YWHAZ, CCNA2, RBBP7, RPA3, MOV10, CNOT1, RAD51D, SUPT16H, PPP1R13L, DNA2, GPI, CNOT11, CNOT6L, MAP2K6, NDUFA4, FANCD2, COX6C, BARD1, E2F7, TAF7L, …	Down-regulated
798	DESERT_PERIVENOUS_HEPATOCELLULAR_CARCINOMA_SUBCLASS_up	0.000440658	0.0047014	-0.379266	-1.68835	2	152	CYB5B, CGREF1, ABLIM1, PRKCA, MRPS33, PGC, PFDN6, MRPS18B, AIMP1, ZBTB18, LGR5, RAB4A, CYP3A4, PARN, MTHFD1, DSP, GNPAT, PMVK, NARS2, SULT2A1, CDK5, CYP1A1, RNPEP, PREB, SCD, ACSM5, MCUR1, CUL1, REG3A, ABCC6, PBXIP1, TIMM17A, STXBP6, ARHGAP12, OAT, SLC4A4, LECT2, TCEAL1, LCN2, EIF2D, CERS2, MTIF2	Down-regulated
799	BENPORATH_ES_CORE_NINE_CORRELATED_up	0.00169075	0.0111415	-0.405219	-1.68916	10	99	BCL11A, ZIC1, TFDP1, EZH2, NFKBIE, E2F3, E2F8, SOX9, MYBL2, YBX1, NFE2L3, WDHD1, STAT1, TBPL1, CEBPG, HDAC2, PLAGL2, VGLL1, KLF5, TRIP13, FOXG1, KDM1A, GTF2H4, BCL11B, MYBBP1A, SPIB, SOX10, TGIF2, HSF1, ELF5, HTATIP2, FOXM1, ILF3, CBFB, ELF4, MYBL1, SMARCA4, SAP30, PAX6, DEK, MDFI	Down-regulated
800	YAO_TEMPORAL_RESPONSE_TO_PROGESTERONE_CLUSTER_14_up	0.00103443	0.0077904	-0.385331	-1.68983	6	136	TMEM97, NOP16, GORASP2, DCTPP1, IPO5, MRPS18B, PPA1, C6orf136, APEX1, PSMB5, FBL, DTYMK, NME1, ERGIC1, MRPL20, PSMB3, HMGN5, MLEC, NHP2, MRPS10, EFTUD2, PREP, TMEM14C, PDIA4, CCT8, ODC1, JAG2, CS, TYMS, TUBB6, UBE2M, NDE1	Down-regulated
804	SERVITJA_ISLET_HNF1A_TARGETS_dn	0.00184303	0.0118319	-0.405562	-1.69189	11	100	PIGR, DDC, UGT1A1, PFKFB2, CDHR2, FRK, PCSK9, NPTX2, ANXA4, SFXN2, ANKS4B, NR1H4, TTR, PAMR1, FXYD3, VIL1, TPI1, MSH5, TRPM5, GRTP1, TM4SF4, TMPRSS4, SEMA4A, MTMR11, CYP4V2, ACE2, GOLT1A, SULT1D1P, ME3, AMBP, SLC37A4, ATP4A, MAPK15, SULT1C2, WNK4, ENPEP, PFKL, FH, ATP7A, FOXA3, GNG12, PFKP	Down-regulated
807	BROWN_MYELOID_CELL_DEVELOPMENT_dn	0.000898069	0.00708494	-0.392733	-1.69639	5	123	TMEM97, NOP16, NOP58, NT5C3A, SPNS2, SF3B3, EIF4E, SMARCC1, APEX1, WDR43, PPAN-P2RY11, NOLC1, HSPH1, TRIM28, NME1, GART, HSPD1, SLC7A5, SRSF7, PSAT1, MBOAT2, NRGN, ADGRG1, NOP56, CDH17, ODC1, AHCY, C1QBP, SLC22A3, SLC16A1, MEP1B, LAMA5, TASP1, UTP4, PAPSS2, BZW2, MFNG, RUVBL2, CCT6A, RPL23	Down-regulated
811	YEGNASUBRAMANIAN_PROSTATE_CANCER_up	0.000446296	0.00475024	-0.390662	-1.70034	2	130	AGR2, SPINK1, SORD, DDC, TOX3, GPR37, TBC1D31, COCH, HMGN5, GCNT1, ERBB3, TFAM, EXOSC4, CENPN, ALDH3A2, KIF23, KLK2, UGT2B11, UGT2B15, GPM6A, DHFR, CLDN3, CLCN4, BCOR, MCCC2, ELF5, PTPRB, ABHD2, KDM6A, DNAAF2, CLDN4, MYBL1, SLC39A8, SUPV3L1, GAS2, E2F5, PBLD, SSX1, EIF2S1, TIMM9, SLC25A21, CALML5, TRIM36, ALB, KLK3, ZBTB10, TSPAN8, SHTN1, ATAD2	Down-regulated
814	REACTOME_GLYCEROPHOSPHOLIPID_BIOSYNTHESIS_up	0.000454683	0.00482805	-0.398991	-1.70625	2	117	PLD6, PLBD1, STARD10, SLC44A5, PLA2G10, LPIN3, CHPT1, AGPAT5, DGAT2, DGAT1, PTDSS2, PCTP, GNPAT, PTDSS1, PISD, PLA2G4D, LPCAT4, MBOAT2, CDS1, GPD2, ALPI, GPD1L, ACHE, ACP6, PLD1, CSNK2A1, LIPH, AWAT2, PLA2G1B, OSBPL5, PLA2G2E, AGPAT2, CPNE3, CPNE7, SLC44A3, PLD4	Down-regulated
816	BILANGES_RAPAMYCIN_SENSITIVE_VIA_TSC1_AND_TSC2_up	0.00143016	0.00984416	-0.442219	-1.71382	8	66	BRI3BP, PRDX3, AIMP1, PPM1G, TSPAN15, MRPL30, SLC25A3, CCT2, PSAT1, BTF3, OLA1, IMPDH2, EIF3E, AHCY, RPL3, SLC25A5, CS, RPL36A, TCP1, PPIB, NSA2, RPH3AL, EIF3K, ATP6V1G2, RPS26, UQCRFS1, RPL10A, BLVRB	Down-regulated
817	LIM_MAMMARY_STEM_CELL_dn	0.00013031	0.00422266	-0.346147	-1.71398	0	399	ERLIN2, MANSC1, WFDC2, PPP1R1B, ST14, STARD10, ORAI1, VIPR1, CD24, CHPT1, SLC5A1, AP3S2, SLC39A11, ZNF750, CEACAM1, HDHD3, ZNF334, GATB, OXLD1, HERC4, FAM110A, IVD, GSTK1, RAB11FIP1, BCL3, FRK, FAM221A, TOM1L1, NUP210, NDUFV3, RBM47, ERBB3, GRHL1, RAB25, DHCR7, ABHD17C, NEU1, BATF, RASSF7, SNRNP35, MYO5C, CRB3, SNX15, REEP6, RAD51D, MBOAT2, RALGPS1, DLG3, SLC28A3, PAK1, RHPN2, PLEKHG3, CLCN3, SLC…	Down-regulated
820	NIKOLSKY_BREAST_CANCER_1Q21_AMPLICON_up	0.00310762	0.0178758	-0.497178	-1.7158	18	38	CKS1B, SCAMP3, ZBTB7B, PMVK, ADAM15, EFNA3, FAM189B, SLC50A1, DCST1, DPM3, PBXIP1, MRPL9, EFNA4, MUC1	Down-regulated
824	WP_METABOLIC_REPROGRAMMING_IN_COLON_CANCER_up	0.00228199	0.0140848	-0.488985	-1.72269	13	42	GLUD1, IDH3A, RPIA, SDHB, GART, SUCLG2, FASN, PYCR2, PDHA1, PSAT1, GPI, TIGAR, SLC16A3, GOT2, PGAM1, PFKL, FH, IDH2, ACLY, PYCR1	Down-regulated
830	ACOSTA_PROLIFERATION_INDEPENDENT_MYC_TARGETS_up	0.000624512	0.0056333	-0.433131	-1.7405	3	80	SORD, TSPO, LYPLA1, PSMG1, MTRR, SLC29A1, CSE1L, OPN3, NOLC1, DDX28, NUP210, DHCR7, EIF4A3, TMEM161A, MTMR4, ODC1, MAST2, AATF, NUP214, JAG2, RCHY1, EXPH5	Down-regulated
831	REACTOME_PROCESSING_OF_CAPPED_INTRON_CONTAINING_PRE_MRNA_up	0.000139665	0.00422266	-0.370744	-1.74452	0	237	RNPS1, SRSF2, SF3B3, NUP58, EIF4E, LSM7, NUP155, LSM5, SLBP, CWC22, THOC1, SNRPB2, U2AF1, SNRPB, YBX1, PTBP1, NUP210, CRNKL1, FIP1L1, HNRNPA0, NUP153, CSTF3, SNRNP35, LSM3, FUS, SRSF7, EFTUD2, SNRPF, PPIL6, EIF4A3, CPSF1, SNRPG, CWC15, NUP93, NXF2B, NUP88, SNRNP25, LSM6, CSTF2, CASC3, LSM2, NUP54, POLR2G, NUP214, RBM8A, HNRNPU, SNRPE, DHX16, CWC27, DDX46, NUP107, POLR2H, WBP4, HNRNPA2B1, BUD31, U…	Down-regulated
832	SHETH_LIVER_CANCER_VS_TXNIP_LOSS_PAM3_up	0.000788395	0.00651808	-0.442423	-1.74574	4	73	SPINK1, CCNB1, TFF3, MKI67, CALML4, UBE2C, SLPI, FABP5, PROM2, PSRC1, LY6D, OCSTAMP, SCD, PROM1, PSAT1, IGFBP1, BMP7, MEP1B, NUCB2, TUBB6, LCN2, DAB1, MYEF2, CDH1, ITGA6, GPC3, CCDC120, GALNT6, LTB, SIDT1	Down-regulated
833	CHARAFE_BREAST_CANCER_BASAL_VS_MESENCHYMAL_up	0.000151309	0.00422266	-0.407789	-1.74608	0	118	EHF, ST14, MARVELD2, SLPI, C6orf132, TMEM30B, MACC1, HOOK2, TRIM29, PROM2, KRT15, ATP1A1, OVOL2, TC2N, PRR15L, RAB25, PRSS8, CDS1, FXYD3, LAD1, GJB3, SETD6, S100P, KIAA0040, COX5B, GRHL2, WDR61, MUC1, ENTPD2, IRF6, LCN2, SPINT1, CDH1, FGFBP1, CD24P4, MYO5B, BSPRY, SSH3	Down-regulated
834	REACTOME_M_PHASE_up	0.000133333	0.00422266	-0.357243	-1.74626	0	344	CDCA5, CENPF, CCNB1, ANAPC1, LBR, KIF20A, TMPO, GORASP2, PLK1, PTTG1, UBE2C, STAG2, SMC3, PRKCA, PLK4, NUP58, NCAPG2, PSMA6, VRK1, SMC2, LPIN3, RCC2, CETN2, NUP155, NCAPD2, KIF18A, CEP250, ZWILCH, PSMB5, CENPJ, NUDC, NCAPG, ZW10, CDCA8, PSMD7, BUB1, MZT2B, DSN1, PSMD8, CDC16, PSMB3, MASTL, PPP2R1A, NUP210, AURKB, NUP153, TUBB1, UBE2I, CENPN, PSMA5, KIF23, PSMF1, TUBA3E, HAUS7, CEP63, NUP93, NUP88…	Down-regulated
836	REACTOME_MITOTIC_G2_G2_M_PHASES_up	0.00014241	0.00422266	-0.379981	-1.74776	0	196	TPX2, CENPF, CCNB1, CDK11A, PLK1, PLK4, PSMA6, E2F3, CETN2, MYBL2, CEP250, PSMB5, CENPJ, PPME1, BORA, PSMD7, MZT2B, PSMD8, PSMB3, PPP2R1A, BTRC, LIN9, TUBB1, CCNA2, LCMT1, PSMA5, PSMF1, TUBA3E, CUL1, HAUS7, CEP63, RBX1, PSMB10, CEP41, CEP152, CCP110, PSMD13, AURKA, MAPRE1, TUBA1B, PSMD14, EP300, TUBB6, GTSE1, NDE1, CDC25C, CEP70, CCNB2, FOXM1, HMMR, HAUS6	Down-regulated
839	YANG_BREAST_CANCER_ESR1_LASER_up	0.00266622	0.0159086	-0.534093	-1.7516	15	30	AGR2, CERS6, IVD, BBOF1, CPT1A, DACH1, HMGCL, SNRNP35	Down-regulated
840	BIDUS_METASTASIS_up	0.000140984	0.00422266	-0.377388	-1.75337	0	211	TPX2, CENPF, PLD6, CCNB1, DDX21, GMNN, RRM1, MCM10, CDC6, DKC1, UBE2C, SRSF2, PLK4, EIF4E, TFDP1, AMD1, CSE1L, NRAS, DSP, YBX1, BUB1, WDHD1, RFC4, CEBPG, ZNF318, NUP153, AZIN1, PRKDC, KIF4A, MPHOSPH9, CCNA2, CENPN, P4HA1, EIF4A3, ODC1, RRN3, HNRNPU, HMGXB4, DHFR, SRD5A1, ZIC2, AURKA, KNSTRN, AGAP1, SMS, HNRNPA2B1, TYMS, LCA5L, FEN1, CCNB2, CRKL, KDM6A, DNAAF2, CBFB, FEM1A, TUBGCP4, CHEK1, PTP4A1,…	Down-regulated
841	ANDERSEN_CHOLANGIOCARCINOMA_CLASS2_up	0.000144259	0.00422266	-0.387415	-1.75499	0	175	TPX2, OLFM4, FERMT1, PLBD1, FAM83D, UBE2C, PPP1R1B, ST14, ANLN, KIF15, PLA2G10, TOP2A, MUC17, CEP55, CDX2, TRIM31, BORA, NFE2L3, BUB1, LGALS4, CEACAM5, DKK1, KRT15, TTK, ANKRD22, MYO1A, GALNT12, KLF5, CTSE, FXYD3, TMC7, ST6GALNAC1, CDH17, BIK, ITGA2, C1GALT1, MYOM3, PLAC8, GJB3, AUNIP, S100P, NOXO1, VSTM2L, PMAIP1, AURKA, LIPH, BCL11B, CAPG, MYH14, MECOM, GPR35, KRT20, CYP2S1, APOBEC1, FGFBP1, GP…	Down-regulated
842	DAIRKEE_CANCER_PRONE_RESPONSE_BPA_up	0.00112976	0.00817581	-0.47909	-1.75555	6	50	SORD, GSPT1, TOP2A, TRAP1, PPM1G, CSE1L, MTHFD1, IGFBP2, NDUFB2, ERBB3, QDPR, EIF2S2, NUP93, C1QBP, TSC1, TNNI1, DHX15, GTF3A, CKM, GOT2, MOGS, EIF3B, FARSA	Down-regulated
848	ICHIBA_GRAFT_VERSUS_HOST_DISEASE_D7_dn	0.00162206	0.0108001	-0.491142	-1.75968	9	45	EXOSC8, ELOVL6, SC5D, IGHA2, HMGCS2, SULT4A1, PROM1, G6PC, LIPC, NXN, CRYL1, CYP4A11, PAPSS2, OSBPL5, TENM3, RELN, DIO1	Down-regulated
850	PYEON_CANCER_HEAD_AND_NECK_VS_CERVICAL_up	0.000143534	0.00422266	-0.38605	-1.76326	0	186	CENPF, GSPT1, TMPO, POLA1, CALML4, RAD51AP1, FAM72C, FNBP1L, KIF15, CCDC14, EZH2, TCAM1P, TMEM30B, INTS7, E2F8, CENPJ, CDCA7, MIS18A, MALSU1, BRIP1, WDHD1, GART, MCM3, FANCL, NUP210, HELLS, CDKN2A, MTF2, MYO5C, REV1, ENOSF1, WDR76, B4GALT4, RASEF, BARD1, E2F7, HSPA1A, ZBTB8A, CEP152, CEP44, HNRNPU, FMR1, GRAMD1C, CCNE2, PRDM15, PMAIP1, MECOM, PARD6B, NEK4, GEN1, ATP8B1, U2SURP	Down-regulated
851	REACTOME_INFLUENZA_INFECTION_up	0.00029274	0.00422266	-0.395195	-1.76369	1	154	RPS13, NUP58, IPO5, KPNA1, NUP155, RPSA, RPL13, NUP210, RPL7, RPL5, RPL8, RPL10L, NUP153, KPNA2, RPS25, RPS20, GRSF1, NUP93, RPL21, NUP88, HSPA1A, NUP54, RPS7, POLR2G, NUP214, RPS4Y2, RPL35, RPL3, NUP107, POLR2H, RPS3, RPL26L1, RPL36A, POLR2C, RPS5, RPL29, RPS18, GTF2F1, RPL23, RPS24, RAN, RPL17, RPS26, RPS6, RPL23A, RPL39, NDC1, DNAJC3, RPL14, RPS10, RPS9, RPL10A, RPLP2, KPNA3, POLR2D, NUP62, PO…	Down-regulated
852	WELCSH_BRCA1_TARGETS_dn	0.000147776	0.00422266	-0.402201	-1.76381	0	136	BMS1, MGST1, CYC1, APEX1, TRAP1, SLC29A1, SEC24C, RPIA, NOLC1, FGFR3, MTHFD1, RABEPK, U2AF1, FASN, HK1, MLEC, DANCR, NSDHL, RASSF7, SLC7A5, EIF2B2, EIF4H, AP3D1, DDX10, EIF3E, DDT, BOP1, FDFT1, NUP214, ATIC, CHD4, AIMP2, EMG1, CHAF1A, HSF1, AGPAT2, MOGS, NOS2, PRRC2A, SMARCA4, CCNE1, EIF3B, SAFB, FARSA	Down-regulated
853	REACTOME_CHROMOSOME_MAINTENANCE_up	0.000776156	0.00651506	-0.431924	-1.76532	4	88	HJURP, POLD2, POLA1, DKC1, MIS18A, RFC4, NHP2, PCNA, CCNA2, RBBP7, CENPN, RPA3, ACD, DNA2, PRIM1, POLR2G, RUVBL1, WRN, CENPT, BLM, PRIM2, POLR2H, MIS18BP1, FEN1, CENPC, POLR2C, DSCC1, DAXX, RUVBL2, CENPW, CENPU	Down-regulated
856	RHODES_CANCER_META_SIGNATURE_up	0.00032077	0.00422266	-0.463806	-1.76859	1	61	TPX2, CKS2, CBX3, PLK1, HSPE1, CDKN3, TOP2A, NME1, MCM3, RFC4, HSPD1, MTHFD2, KPNA2, CRIP2, SNRPF, EIF4A3, PTMA, AHCY, SNRPE, HNRNPA2B1, OGT	Down-regulated
859	YIH_RESPONSE_TO_ARSENITE_C3_up	0.0028258	0.0166392	-0.542707	-1.76937	16	29	NDUFAB1, PRKCA, CDKN3, PFDN4, RFC4, TFAM, CDKN2A, IGF2, CCNF, PRKCD, MDM2, CASP10, XRCC6	Down-regulated
861	GAVIN_IL2_RESPONSIVE_FOXP3_TARGETS_up	0.00396757	0.0218145	-0.624229	-1.77065	22	17	SORD, ST14, ARMCX4, KIF3B, ELOVL6, FOXP3	Down-regulated
862	REACTOME_APC_C_MEDIATED_DEGRADATION_OF_CELL_CYCLE_PROTEINS_up	0.000936622	0.007342	-0.434615	-1.77142	5	87	CCNB1, ANAPC1, PLK1, PTTG1, UBE2C, PSMA6, PSMB5, PSMD7, PSMD8, CDC16, PSMB3, FZR1, AURKB, BTRC, CCNA2, PSMA5, PSMF1, CUL1, PSMB10, PSMD13, AURKA, PSMD14	Down-regulated
863	JIANG_TIP30_TARGETS_dn	0.0044361	0.0236719	-0.584828	-1.77268	25	22	CIDEB, AKAP1, ASS1, CLDN6, BLCAP, IGF2, MAZ, LAD1	Down-regulated
865	REACTOME_MITOCHONDRIAL_PROTEIN_IMPORT_up	0.000160231	0.00422266	-0.466914	-1.77445	0	60	COA6, SLC25A13, PMPCB, CYC1, TIMM44, CHCHD3, HSPD1, TOMM6, CMC2, TIMM17A, HSPA9, IDH3G, CS, CHCHD4, GRPEL1, CMC4, TOMM7, PITRM1, COQ2, DNAJC19, TIMM22, TIMM9, TOMM22, TIMM17B, SLC25A12, CHCHD2, TIMM50, TOMM20, TIMM10B, CHCHD7	Down-regulated
869	MORI_EMU_MYC_LYMPHOMA_BY_ONSET_TIME_up	0.000306138	0.00422266	-0.4239	-1.78066	1	104	GINS2, TIPIN, SRSF2, COX5A, ELOVL6, MTHFD1, TRIM28, PTGR1, SNRPB, WDHD1, TYSND1, SMARCD2, GEMIN5, SMPD4, EFTUD2, CENPN, EIF4EBP2, LSM6, TRAF5, AHCY, MED9, CBX1, CBX2, PRIM2, STRBP, EBF1, MIS18BP1, IGF2BP3, TOPBP1, UBE3D, ILF3, DNAAF2, PDE2A, SMARCA4, FKBP3, MDM1, DCK	Down-regulated
873	GARCIA_TARGETS_OF_FLI1_AND_DAX1_dn	0.000292056	0.00422266	-0.398915	-1.78342	1	156	CYB5B, CDCA5, GMNN, GINS2, TMPO, TIPIN, MCM10, CDC6, ZNF114, MRPL48, RPIA, MYBL2, NOLC1, DDX27, ZWILCH, RFFL, CHCHD3, TELO2, CHAF1B, GEMIN5, RIMBP3, MRPL11, WDR76, PTMA, NOP56, SCLY, ESCO2, FANCE, PRELID1, CBX2, STRBP, DHFR, MAPRE1, ADAP1, CKMT2, TYMS, FEN1, TGIF2, TPRKB, RRP15, KCNE3, RASSF1, MRPL24, WDR5, CHEK1, TOE1, CCNE1, SPATA5, TRMT10A, PPIL1, DUT, RRP9, RSL1D1, NT5DC3	Down-regulated
875	LI_AMPLIFIED_IN_LUNG_CANCER_up	0.000143637	0.00422266	-0.393889	-1.78773	0	177	SPINK1, LAPTM4B, CYCS, TFF3, UQCRH, CBX3, UBE2C, HSPE1, HAX1, TFF1, IGFBP2, DSP, TRIM28, NME1, STAT1, CEACAM5, RPL13, PSMD8, EIF3C, MARCKSL1, RPL7, HSPD1, RPL8, ERBB3, TXNRD1, SLC7A5, UBE2I, YWHAZ, RPS20, GPI, UQCRB, TRIM2, SLC22A18, ADGRG1, LDHB, ODC1, PHLDA2, PABPC1, RPS7, MALL, SNRPE, JUP, FGG, HDGF, RPL35, S100P, VEGFA, MUC1, ABCC3, RPL36A, LCN2, SPINT1, CDH1, RPS5, CD46	Down-regulated
876	BLANCO_MELO_HUMAN_PARAINFLUENZA_VIRUS_3_INFECTION_A594_CELLS_dn	0.000152114	0.00422266	-0.419371	-1.78889	0	115	EPHB3, FCGBP, CA9, USH1C, C21orf58, RAP1GAP, FGFR3, SNORA50C, LGALS4, VPS37D, MYO1A, LMNTD2, CRB3, ATOH8, ANKS4B, ROM1, SLC29A4, CAPS, GAL3ST1, ABCC6, ADM5, FOXD2, NPW, DEGS2, TIGD3, CLDN3, GPR35, HOXC13-AS, TYMSOS, C6orf226, SELENBP1, ARHGAP33, CACFD1, AQP3, GPR162, MCF2L, TLX2, NECAB2, AMBP, ANXA9, CYP4F12, AMH, TMEM191A, ZDHHC8P1, PLEKHH3, C9orf152	Down-regulated
878	DESERT_STEM_CELL_HEPATOCELLULAR_CARCINOMA_SUBCLASS_up	0.00013988	0.00422266	-0.381227	-1.79075	0	234	SPINK1, LAPTM4B, TPX2, SLC7A1, PLBD1, PRC1, HJURP, LBR, KIF20A, CKS2, CBX3, PTTG1, DKC1, UBE2C, RAD51AP1, KIF15, SMARCC1, AMD1, TOP2A, AGPAT5, NCAPD2, CSE1L, SOX9, RPSA, TROAP, RAP1GAP, FBL, CEP55, MID1IP1, NCAPG, COCH, TRIM28, BORA, BUB1, DKK1, PSRC1, MCM3, MARCKSL1, TTK, HELLS, RPL8, INTS8, MTHFD2, S100A6, UBE2I, CCT2, HDAC2, YWHAZ, DSG2, TRIP13, KIF23, SALL2, PTK2, TRAF5, EIF3E, GPD1L, PHLDA2,…	Down-regulated
879	FOURNIER_ACINAR_DEVELOPMENT_LATE_2_up	0.000137836	0.00422266	-0.374871	-1.79079	0	270	FERMT1, EXOSC8, MELK, GINS2, PRC1, HJURP, CKS1B, TMPO, TIPIN, CKS2, POLA1, PLK1, XRCC3, PTTG1, CDC6, SF3B3, HACD3, CDKN3, LYPLA1, NCAPG2, NIF3L1, VRK1, UCHL5, PRDX3, ELOVL6, CSE1L, NOLC1, MTHFD1, DCAF15, SNRPB, FASTKD1, MCM3, TTK, POLQ, DNM1L, NUP153, DNAJC10, PRKDC, SMPD4, KIF4A, CCT2, PREB, SCD, SNRPF, CENPN, RPA3, SUPT16H, TRIP13, MCUR1, UPP1, BARD1, CMC2, ODC1, GEMIN6, CCNF, EEF1E1, BLM, CSNK…	Down-regulated
880	POMEROY_MEDULLOBLASTOMA_PROGNOSIS_dn	0.00130933	0.00916445	-0.510835	-1.79116	7	41	CENPF, NCAPD2, TRAP1, SLC29A1, MYBL2, RPSA, FGFR3, SRI, RPS25, BARD1, LDHB, ATIC, RPL29, RPS18	Down-regulated
883	WANG_CISPLATIN_RESPONSE_AND_XPC_up	0.000143843	0.00422266	-0.396642	-1.79877	0	176	PLEKHH1, IGDCC3, LBR, ADGRG6, UBE2C, SMARCC1, PPP5C, MLH1, CETN2, NCAPD2, ADK, TARBP1, GGCT, TFF1, HSBP1, CEACAM1, DBI, F7, IGFBP2, ASGR1, TTK, HMGCS1, TELO2, ATAD3A, G6PC, RPA3, IGFBP1, TRIP13, FXYD3, NUP93, MGST2, PMEL, INSIG1, MXD3, AURKA, HNRNPA2B1, SCARB1, UBD, IGF2BP3, FEN1, FADS2, MYEF2, CDH1, GPC3, CFB, KIF22, CNTN2, CLDN4, YEATS4, HEY1, KRT18, AREG, CDC7, DCK, PTPRN2, PGK2, IGF2R, HMGB2,…	Down-regulated
884	REACTOME_METABOLISM_OF_AMINO_ACIDS_AND_DERIVATIVES_up	0.000132433	0.00422266	-0.367005	-1.79928	0	356	RPS13, NDUFAB1, DDC, SLC25A13, CKMT1A, GOT1, GLUD1, CBS, PSMA6, AMD1, AGMAT, AIMP1, MTRR, RPSA, PSMB5, ALDH18A1, IVD, AFMID, PSMD7, CARNS1, RPL13, PSMD8, PSMB3, GPT, RPL7, RPL5, RPL8, PYCR2, NMRAL1, QDPR, GPT2, RPL10L, TXNRD1, ASS1, ETHE1, AZIN1, SLC7A5, DUOX1, AADAT, RPS25, MTAP, AGXT2, PDHA1, PSAT1, RPS20, PSMA5, PSMF1, ALDH7A1, DHTKD1, DUOX2, RPL21, PSMB10, SCLY, MPST, ODC1, AHCY, EEF1E1, RPS7…	Down-regulated
885	REACTOME_COOPERATION_OF_PREFOLDIN_AND_TRIC_CCT_IN_ACTIN_AND_TUBULIN_FOLDING_up	0.0016592	0.0109821	-0.537453	-1.80136	9	33	PFDN6, PFDN2, PFDN4, TUBB1, CCT2, TUBA3E, CCT8, CCT7, TUBA1B, TUBB6, TCP1, CCT6A, PFDN5, TUBA4B, VBP1, TUBAL3, TUBB4B	Down-regulated
886	WEST_ADRENOCORTICAL_TUMOR_up	0.000136519	0.00422266	-0.375437	-1.80197	0	283	TPX2, TMEM97, PARPBP, GPR89B, CENPF, GLRX2, CCNB1, GMNN, MELK, PRC1, KIF20A, TMPO, PTTG1, ACSM3, EZH2, MICA, TOP2A, INTS7, LSM5, ELOVL6, EPB41L4B, ZWILCH, NRAS, KDM4B, BABAM1, RDH11, DCAF15, BUB1, SC5D, ATP1A1, NPTX2, HMGCS1, GLO1, ANXA4, MTHFD2, ACAT2, CEBPG, DHCR7, NEU1, DICER1, SLC7A5, MTF2, SCD, FAM32A, IGF2, EIF2S2, RALGPS1, MCUR1, NR1H4, UBE2V2, BARD1, CMC2, CLINT1, FDFT1, MRPL18, TFCP2, TS…	Down-regulated
888	KEGG_BUTANOATE_METABOLISM_up	0.00132253	0.00920228	-0.535044	-1.80494	7	34	ACSM3, ALDH2, HMGCS2, HMGCS1, ACAT2, HMGCL, PDHA1, L2HGDH, ALDH3A2, ACSM5, ALDH7A1, ABAT, ACSM2A, ACSM4	Down-regulated
890	WP_NICOTINE_ACTIVITY_ON_DOPAMINERGIC_NEURONS_up	0.00358362	0.0200727	-0.605918	-1.81472	20	21	CHRNA5, DDC, PPP1R1B, CHRNA4, DRD3, CDK5, CHRNB2, TH, SLC18A2	Down-regulated
894	ABRAMSON_INTERACT_WITH_AIRE_up	0.00114566	0.00821495	-0.52016	-1.82385	6	41	SRSF2, SMC3, TOP2A, TRIM28, SNRPB, GEMIN5, PRKDC, PCNA, EFTUD2, SUPT16H, NUP93, NOP56, C1QBP, PABPC1	Down-regulated
895	CHO_NR4A1_TARGETS_up	0.000997009	0.0076895	-0.549239	-1.82636	5	32	GPR148, S100G, DDIT3, EAF1, HMOX1, HLCS, ATF3, ABCC6, EXTL1, INSIG1, RIPPLY3, GCNT3, SLC3A2	Down-regulated
898	SCHLOSSER_MYC_TARGETS_AND_SERUM_RESPONSE_up	0.000486145	0.00502717	-0.510496	-1.83575	2	46	GSPT1, SRSF2, AMD1, LSM7, ZPR1, NME1, SNRPB, PTDSS1, FAM216A, SLC7A5, ODC1, SCAMP1, GRPEL1, ILF3, EIF5B, CCDC86, PRMT1, COMT, INTS10, BAG1, UCK2, ATP1B3, CAMKK2, DDB1	Down-regulated
900	REACTOME_O_LINKED_GLYCOSYLATION_OF_MUCINS_up	0.000160231	0.00422266	-0.483702	-1.83825	0	60	GALNT7, MUC17, MUC13, MUCL1, GCNT1, GALNT12, GALNT15, MUC3A, B4GALT5, C1GALT1, MUC12, MUC15, MUC1, GALNT5, B3GNT3, MUC5B, GALNT14, GALNT8, GCNT3, MUC7, GALNT6, MUC21, GALNTL5, B3GNT9, MUC20, ST6GALNAC4, GALNT18, B3GNT7	Down-regulated
901	COLDREN_GEFITINIB_RESISTANCE_dn	0.000140845	0.00422266	-0.395244	-1.83903	0	213	AGR2, MYO1D, EHF, RNF114, ST14, STARD10, C6orf132, TMEM30B, MACC1, ADK, FAM110A, TTC22, SMAGP, TMEM45B, KRT15, OVOL2, RBM47, TC2N, PRR15L, ERBB3, GRHL1, RAB25, ANKRD22, HMGCL, HS3ST1, SMIM22, PRSS8, CDS1, DOK7, RASEF, CCDC115, FXYD3, CAPS, LAD1, BIK, SPINK2, EPS8L2, PRKCD, TMEM54, KLC3, GRAMD1C, KIAA0040, GRHL2, EXPH5, LIPH, ADAP1, ZNF600, B3GNT3, MYH14, SVIL, AKTIP, IRF6, SPINT1, LRG1, CDH1, FGF…	Down-regulated
905	MALONEY_RESPONSE_TO_17AAG_dn	0.000157406	0.00422266	-0.470828	-1.84525	0	70	CYCS, PLK1, UBE2C, SRSF2, PRDX3, ABCE1, GNPAT, SNRPB, PDCD5, KPNA2, SRSF7, SNRPF, PSMA5, SNRPG, PTMA, CA12, WRN, SNRPE, RPL35, TPI1, CLDN3, HNRNPM, GM2A, ZNF43, CCT6A	Down-regulated
906	FERRANDO_T_ALL_WITH_MLL_ENL_FUSION_dn	0.000313873	0.00422266	-0.457882	-1.84534	1	82	SORD, POLD2, LBR, RRM1, UBE2C, HINT1, DNTT, PSMA6, TOP2A, SLC29A1, CSE1L, IGFBP2, PCNA, HPCA, NUP93, BARD1, C1QBP, BCLAF1, TYMS, KHSRP, CHAF1A, TXN, GOT2, PRRX2, APLNR, APLP2, PGAM1, MAPKAPK3, DUT, EIF3B, USP10, HMGB2	Down-regulated
908	REACTOME_S_PHASE_up	0.000145349	0.00422266	-0.413145	-1.85345	0	161	CDCA5, GINS2, ANAPC1, POLD2, CKS1B, POLA1, CDC6, UBE2C, STAG2, SMC3, TFDP1, PSMA6, PSMB5, PSMD7, PSMD8, CDC16, MCM3, PSMB3, FZR1, ORC5, RFC4, MCM8, POLE2, LIN9, PCNA, CCNA2, RPA3, DNA2, PSMA5, PSMF1, CUL1, PRIM1, RBX1, PSMB10, ESCO2, PSMD13, PRIM2, CCNE2, POLE, PSMD14, FEN1	Down-regulated
910	SANSOM_APC_TARGETS_REQUIRE_MYC_up	0.000141583	0.00422266	-0.401808	-1.85944	0	205	GINS2, RPS13, TMPO, BCL11A, SMARCC1, RCC2, PPAN-P2RY11, RPS6KA6, LANCL2, NOLC1, MDN1, FBL, WDR4, DTYMK, NME1, TMEM141, EPHB2, EMC8, NELFA, MCM3, GRWD1, RAD54L, MBD3, MED22, SLC1A4, TELO2, NHP2, NFS1, HAGHL, VARS2, GEMIN5, TK1, BIVM, SMPD4, SNRPF, METTL2A, TRIB1, METTL1, WDR62, DDX49, CTBS, SNRPG, TMEM186, NOP56, KNOP1, BMP7, MFSD13A, CCT7, POLE, ERCC1, BCL11B, FHOD1, SKA1, FADS2, MYEF2, MYBBP1A, …	Down-regulated
912	WONG_ENDMETRIUM_CANCER_up	0.0010185	0.00775783	-0.601741	-1.86529	5	24	TFF3, ZIC1, MALSU1, PITX1, DKK4, VIL1, LCN2, TFAP2A, HP, CXCL5, CDC20B, CCL20, SAA2, KIF1A	Down-regulated
914	YAO_TEMPORAL_RESPONSE_TO_PROGESTERONE_CLUSTER_11_up	0.000309119	0.00422266	-0.453337	-1.86885	1	92	BMS1, DDX21, CYCS, GSPT1, NOP58, SRSF2, PLA2G10, AMD1, ABCE1, PPAN-P2RY11, CSE1L, NIFK, LTV1, GNL3, KPNA2, DDX51, METTL1, DNAJB11, NOP56, BOP1, STIP1, PUM3, RRS1, ACTL6A, NDUFAF4, NUCB2, LRP2, UTP4, RANGRF, CRELD2, GSTM1, LGALSL, AREG	Down-regulated
921	KEGG_RETINOL_METABOLISM_up	0.000160643	0.00422266	-0.504273	-1.88296	0	55	RDH10, UGT1A1, CYP3A5, UGT2A3, CYP3A4, RDH11, DGAT2, DGAT1, ADH1C, CYP1A1, UGT2B4, CYP2A6, DHRS9, CYP26A1, UGT2B11, CYP2C18, UGT2B15, AWAT2, CYP4A11	Down-regulated
924	HORTON_SREBF_TARGETS_up	0.000509251	0.00502717	-0.610364	-1.89202	2	24	ELOVL6, RDH11, SC5D, PMVK, FASN, PCSK9, HMGCS1, ACSS2, FDFT1, INSIG1	Down-regulated
925	BASAKI_YBX1_TARGETS_up	0.000137457	0.00422266	-0.395823	-1.89444	0	277	TPX2, GLRX2, CCNB1, AHSA1, MELK, GINS2, PRC1, HJURP, MKI67, KIF20A, FAM83D, MCM10, PLK1, PTTG1, CDC6, UBE2C, HINT1, ANLN, CDKN3, SMC2, NCAPD2, ZWILCH, CEP55, WDR4, SAC3D1, MIS18A, MTHFD1, DTYMK, CDCA8, NTN4, BORA, BUB1, WDHD1, GART, ZNF71, DKK1, DIAPH3, MCM3, DPAGT1, AURKB, ATL3, CHORDC1, KPNA2, TK1, CSTF3, PRKDC, SLC7A5, SMPD4, KIF4A, CCNA2, CENPN, TRIP13, KIF23, NUP93, SHCBP1, RNMT, E2F7, SLC52…	Down-regulated
926	SMITH_LIVER_CANCER_up	0.000324097	0.00422266	-0.528712	-1.90125	1	46	CENPF, HJURP, DDC, PFDN6, CDKN3, IMPA2, ZBTB18, CHPT1, TOP2A, RAB4A, PMVK, PDCD5, NHP2, PAK4	Down-regulated
927	AUNG_GASTRIC_CANCER_up	0.000323206	0.00422266	-0.521468	-1.90227	1	49	OLFM4, IFRD1, RCC2, MYBL2, ZWILCH, MIA, RPL8, KIF4A, NOP14, ATE1, ALDH7A1, FXYD3, MED1, DKK4, DEFA5, SH3BGRL2, TYRO3, HOXA10, DEFA6	Down-regulated
928	WILCOX_RESPONSE_TO_PROGESTERONE_up	0.000147016	0.00422266	-0.428394	-1.90315	0	149	CYB5B, TMEM97, CENPF, CCNB1, PRC1, HJURP, KIF20A, ADGRG6, CDC6, SMC2, TOP2A, ATG2B, ELOVL6, CEP55, NCAPG, XRCC4, WDHD1, SC5D, CNTN6, HMGCS1, CDKN2C, ACAT2, DHCR7, NSDHL, TK1, MTF2, KIF4A, FAXDC2, SCD, CENPN, MAP7, KLF5, SHCBP1, HMOX1, FDFT1, TRPC4, HMGCR, INSIG1, LIPG, MUC5B, ZCCHC10, TYMS, FADS2, MSMO1, ADAMTS20, EBP, CCNB2, HMMR, DNAAF2, IDH1, ARHGEF3, BBS7, CENPU, MDM1, AREG, CXCL5	Down-regulated
929	REACTOME_MITOTIC_G1_PHASE_AND_G1_S_TRANSITION_up	0.000147254	0.00422266	-0.429353	-1.90595	0	148	CCNB1, GMNN, CKS1B, MCM10, POLA1, CDC6, CDKN2D, TFDP1, PSMA6, E2F3, TOP2A, MYBL2, PSMB5, PSMD7, PSMD8, MCM3, PSMB3, PPP2R1A, ORC5, MCM8, CDKN2C, POLE2, CDKN2A, LIN9, TK1, PCNA, CCNA2, RPA3, PSMA5, PSMF1, CUL1, PRIM1, PSMB10, PSMD13, PRIM2, DHFR, CCNE2, POLE, PSMD14, TYMS	Down-regulated
931	RIZ_ERYTHROID_DIFFERENTIATION_up	0.000156519	0.00422266	-0.474734	-1.91075	0	81	EXO1, CBX3, POLA1, POLG2, CDKN2D, TFDP1, EZH2, BRCA1, HMGB1, TOP2A, MYBL2, ZBTB17, POU2F3, STAT1, MCM3, AURKB, ID1, POLE2, SUPT4H1, KIF4A, ANKRD49, CTCF, BLM, FEN1, CENPC, GCM2, HSF1, ELF4, ARNTL, TRIM27, CENPB, POU2F1, HMGB2, CLOCK, MCM7, UHRF1, PLA2G6, RAB2A, HMGN2, DHX9, PBX2, MCM5, MCM4, POLD1, MCM2	Down-regulated
932	GARGALOVIC_RESPONSE_TO_OXIDIZED_PHOSPHOLIPIDS_TURQUOISE_dn	0.000321595	0.00422266	-0.517131	-1.91306	1	52	MKI67, TMPO, PLK1, KIF15, NIF3L1, ARMCX4, ELOVL6, E2F8, NEIL3, DDX28, CDKN2C, CCNA2, ENOSF1, BARD1, GEMIN6, CCNF, RRS1, CBX2, AURKA, LYL1, PLCXD1, FAM111A, SKP2, ZNF174, PIK3CG, CDC20, FAM111B, TACC3	Down-regulated
933	REACTOME_THE_CITRIC_ACID_TCA_CYCLE_AND_RESPIRATORY_ELECTRON_TRANSPORT_up	0.000147037	0.00422266	-0.431679	-1.91434	0	147	CYCS, NDUFAB1, UQCRH, NDUFA5, LRPPRC, CYC1, IDH3A, COX5A, TRAP1, LDHAL6A, SDHB, NDUFAF7, ETFA, SUCLG2, NDUFA9, NDUFV3, NDUFB2, GLO1, NDUFA1, IDH3B, PDHA1, L2HGDH, NDUFAF2, NDUFA4, COA1, UQCRB, COX6C, BSG, TMEM186, LDHB, SDHD, MPC2, NDUFB10, NDUFA12, COX11, SLC16A1, COX5B, NDUFS6, NDUFAF4, IDH3G, CS, NDUFB11, FAHD1, SLC16A3, TIMMDC1, ME2, UQCRQ, NDUFB9, PDP2, ME3, NDUFAF5, NDUFA10, COX6A1, NDUFS3,…	Down-regulated
934	SHEPARD_BMYB_TARGETS_up	0.000157679	0.00422266	-0.485935	-1.91743	0	73	TPX2, BMS1, PARPBP, CCNB1, PRR11, MELK, PRC1, MKI67, CKAP2, TOX3, ANLN, ATP1A1, MASTL, TTK, AURKB, PHF20L1, TK1, CDCA2, POU3F3, KIF23, POU3F2	Down-regulated
936	DUTERTRE_ESTRADIOL_RESPONSE_6HR_up	0.000140647	0.00422266	-0.410952	-1.91991	0	221	CHRNA5, DDX21, PLEKHH1, SLC7A1, GINS2, EXO1, MCM10, XRCC3, CDC6, DKC1, BRI3BP, RRP12, AMD1, BRCA1, ABCE1, SLC29A1, OPN3, XRCC2, RBBP8, NOLC1, WDR4, CDCA7, BRIP1, WDHD1, GART, FRK, MCM3, MCM8, HELLS, AKAP1, HSPD1, SLC1A4, EMC3-AS1, POLE2, SLC7A5, WDR3, PCNA, LYAR, ALDH3A2, SFXN2, WDR76, TMEM164, CELSR2, PRIM1, IL17RB, NOP56, DDX10, CA12, RUVBL1, RRS1, SLC16A1, CCNE2, FAM102A, TMEM120B, UNG, KRT13,…	Down-regulated
937	REACTOME_TRNA_PROCESSING_up	0.000153586	0.00422266	-0.461181	-1.92392	0	100	ADAT2, PUS7, NUP58, DDX1, POP1, NSUN6, NUP155, TSEN2, WDR4, NUP210, NUP153, TRMT61B, METTL1, TRMU, CPSF1, RPP25, THG1L, NUP93, NUP88, TRMT12, CSTF2, NUP54, MTO1, NUP214, TRDMT1, CTU1, NUP107, URM1, TPRKB, ZBTB8OS, TRMT10C, TRMT10A, PUS1, RAN, TRMT13, TSEN34, NDC1, C2orf49, RPP14, LCMT2, NUP62, OSGEP, RPPH1, THADA, TRMT6, XPOT, RPP38, LAGE3, TYW5	Down-regulated
938	SASAKI_ADULT_T_CELL_LEUKEMIA_up	0.000145012	0.00422266	-0.428128	-1.92447	0	163	TPX2, MYO1D, CENPF, RLN2, CCNB1, MKI67, PLK1, PTTG1, UBE2C, HINT1, TFDP1, CDKN3, MYCBP, TOP2A, BOLA2, ETFA, GLB1, NME1, STAT1, MCM3, CETN3, PPID, FHL2, BATF, TK1, JAK3, PCNA, CCNA2, LPCAT4, TRIB1, DLG3, ATP8A1, NOMO1, DOK5, BARD1, SP1, MED24, CD47, LSM2, TFCP2, PLD1, CCP110, POLR2H, TYMS, TFAP2A, CAV1, PDCD10, POU4F1, PPP1CC, CCNB2, PPIB, FOXM1, IDH1, ATP1B1, KIF2C, ATP2C1, PTPRN2, ADORA2BP1, SAP…	Down-regulated
941	LIU_CDX2_TARGETS_up	0.000165317	0.00422266	-0.572865	-1.93252	0	34	AGR2, FABP6, PGC, ATOH1, MUC2, CDX1, KLF5, VIL1, KRT20, SOX10, NOTCH4, ANPEP	Down-regulated
943	FRASOR_RESPONSE_TO_SERM_OR_FULVESTRANT_dn	0.000323625	0.00422266	-0.536598	-1.93713	1	47	CENPF, CKS1B, RRM1, UBE2C, MTHFD1, MCM3, CDKN2C, TK1, CCNA2, PRIM1, BARD1, MAZ, STMN1, BLM, POLE, AURKA, CHAF1A, FOXM1, KIF2C, TTLL4, RFC5, NUDT1, GAL, MYRF, CDC20	Down-regulated
944	REACTOME_CELL_CYCLE_CHECKPOINTS_up	0.000139451	0.00422266	-0.40999	-1.93767	0	247	RMI2, CENPF, BRCC3, CCNB1, ANAPC1, EXO1, MCM10, PLK1, CDC6, UBE2C, PHF20, PSMA6, BRCA1, RCC2, RBBP8, KIF18A, ZWILCH, PSMB5, BABAM1, NUDC, ZW10, CDCA8, BRIP1, PSMD7, BUB1, DSN1, PSMD8, CDC16, MCM3, PSMB3, PPP2R1A, ORC5, RFC4, AURKB, MCM8, CDKN2A, YWHAZ, CCNA2, CENPN, RPA3, DNA2, PSMA5, PSMF1, UBE2V2, BARD1, PSMB10, WRN, MDM2, CENPT, BLM, PSMD13, CCNE2, NUP107, RNF8, MAPRE1, PSMD14, SKA1, GTSE1, CE…	Down-regulated
945	KIM_MYC_AMPLIFICATION_TARGETS_up	0.000142511	0.00422266	-0.422875	-1.93851	0	189	EGFLAM, DDX21, CYCS, TIPIN, PUS7, DKC1, LRPPRC, MRPS33, MRPL36, NHLH1, LYPLA1, VRK1, IDH3A, PSMG1, EPB41L4B, RPSA, FBL, NIFK, NEK3, ETFA, RABEPK, NAA30, PNP, NME1, FASTKD1, WDR41, FAM216A, RPL5, HSPD1, AIFM1, DACH1, FAM89A, WDR3, NOB1, LYAR, PDHA1, NDUFAF2, EIF2S2, ALDH3A2, EBPL, GPI, KCNS1, PFAS, NOP56, CHN1, LDHB, ODC1, CEP152, MRPL50, EEF1E1, CA12, SLC16A1, SPINK5, SLC25A5, ABCC3, NIP7, SEMA6A…	Down-regulated
950	PID_PLK1_PATHWAY_up	0.000325733	0.00422266	-0.545584	-1.94465	1	44	TPX2, CCNB1, PRC1, KIF20A, PLK1, STAG2, NUDC, BORA, BUB1, PPP2R1A, FZR1	Down-regulated
952	WHITFIELD_CELL_CYCLE_S_up	0.000147907	0.00422266	-0.444512	-1.94653	0	135	CDCA5, EXO1, RRM1, ADGRG6, UBE2T, RAD51AP1, CCDC14, EZH2, BRCA1, CERS6, TOP2A, INTS7, E2F8, RBBP8, BRIP1, BBS2, RAD54L, MASTL, RFC4, MCM8, HELLS, DEPDC7, BIVM, SH3GL2, DNA2, EIF4EBP2, PRIM1, CAPS, SP1, ESCO2, SLC22A3, FAM214A, BLM, PRIM2, DHFR, LIPH, TYMS, FEN1, OGT, CDH24, STAG3L1, ABCC2, TTC31, NAB1, ASIP, CDC45, DSCC1, CENPU, CDC7, PHIP, ANKRD18A	Down-regulated
953	REACTOME_RRNA_MODIFICATION_IN_THE_NUCLEUS_AND_CYTOSOL_up	0.000160643	0.00422266	-0.522569	-1.95128	0	55	BMS1, WDR36, NOP58, DKC1, WDR43, FBL, IMP3, DDX52, NHP2, KRR1, WDR3, UTP20, UTP6, NOL11, DDX49, NOP14, NOP56, RPS7, WDR75, TSR3, EMG1, UTP4	Down-regulated
955	BUFFA_HYPOXIA_METAGENE_up	0.000161603	0.00422266	-0.538121	-1.96301	0	49	KIF20A, ANLN, CDKN3, CA9, PNP, PSRC1, KIF4A, P4HA1, GPI, SHCBP1, MRPS17, SLC25A32, SEC61G, SLC16A1, TPI1, VEGFA, TUBB6, DDIT4, CORO1C, ESRP1, PGAM1	Down-regulated
956	WHITFIELD_CELL_CYCLE_G2_up	0.000145349	0.00422266	-0.439195	-1.97031	0	161	MELK, HJURP, LBR, TMPO, CKAP2, FAM83D, ADGRG6, UBE2C, ANLN, TOP2A, FAM72B, RDH11, NEIL3, CDCA8, FAM110A, BORA, STAT1, PSRC1, CDC16, TYSND1, POLQ, FZR1, AURKB, ARHGAP11B, CDKN2C, TRAIP, SKA3, DCAF7, ATL2, KPNA2, KDM4A, ARHGEF39, CCNA2, CKAP2L, MET, WDR62, CDCA2, KIF23, FANCD2, FAN1, AP3D1, MTCL1, CCNF, BCLAF1, TMEM132A, KBTBD2, MUC1, MIS18BP1, TFAP2A, CDC25C, EBI3	Down-regulated
957	PYEON_HPV_POSITIVE_TUMORS_up	0.000154943	0.00422266	-0.480469	-1.97641	0	91	RMI2, CENPF, HENMT1, KIF15, EZH2, ZBTB18, TCAM1P, INTS7, CENPJ, CDCA7, MEI1, MCM3, FANCL, MCM8, HELLS, CDKN2C, CDKN2A, CSTF3, MPHOSPH9, WDR76, FBXO22, IL17RB, BARD1, E2F7, TAF7L, HNRNPU, DHFR, PRDM15, TYMS, GEN1	Down-regulated
958	THILLAINADESAN_ZNF217_TARGETS_up	0.000328677	0.00422266	-0.577297	-1.98174	1	37	PRR11, LBR, RAD51AP1, EIF4E, BRCA1, FGFRL1, CDCA8, MCM8, SKA3, CAMK2N1, CNOT1, DAZAP1, IRX2, CDC25C, BAIAP2L1, CENPU, ETF1	Down-regulated
959	REACTOME_TRNA_AMINOACYLATION_up	0.00016975	0.00422266	-0.640156	-1.98437	0	24	PPA1, HARS2, AIMP1, MARS2, DARS2, NARS2, CARS2, VARS2, AARS2, EEF1E1, AIMP2, YARS2, FARSA, FARSB, PPA2, TARS2	Down-regulated
960	LI_WILMS_TUMOR_VS_FETAL_KIDNEY_1_dn	0.00014637	0.00422266	-0.444831	-1.9852	0	154	TPX2, CENPF, MELK, MKI67, CKS1B, CKS2, RRM1, PTTG1, DKC1, PLK4, DDX1, CDKN3, EZH2, BRCA1, TOP2A, NOLC1, TAF5, NME1, FAM216A, TTK, AURKB, MTHFD2, DDX52, TXNRD1, KPNA2, MPHOSPH9, PCNA, YWHAZ, SNRPF, TRIP13, KIF23, SALL2, PRIM1, CHN1, COL13A1, STMN1, BOP1, SLC16A1, BLM, PRIM2, AURKA, UNG, FEN1, FADS2, BAZ1A, CDC25C, CHAF1A, TOPBP1, CCNB2	Down-regulated
961	LEE_METASTASIS_AND_RNA_PROCESSING_up	0.000345244	0.00422266	-0.7118	-1.9891	1	16	EXOSC8, FBL, SLBP, GEMIN5, GRSF1, BOP1, PABPC1, DHX16, HNRNPA2B1	Down-regulated
963	WENG_POR_TARGETS_GLOBAL_up	0.000344353	0.00422266	-0.692253	-1.99728	1	18	CYB5B, TCEA3, AQP8, HMGCS1, DHCR7, ETHE1, GCK, CYP2C18, MSMO1, GSTM1	Down-regulated
964	KOKKINAKIS_METHIONINE_DEPRIVATION_96HR_dn	0.000156519	0.00422266	-0.509134	-2.00226	0	71	CCNB1, RRM1, RAD54B, IFRD1, MAP3K14, PNP, NME1, GSTK1, PMVK, POLQ, AURKB, ERBB3, CEBPG, CDK5, IRF7, TK1, MTAP, DDIT3, MET, UPP1, RPS6KA5, NOXA1, MGST2, CCNE2, MAP3K9, FEN1, CTPS2, EBP, CDH1, TRADD, CCNB2	Down-regulated
966	ZHAN_MULTIPLE_MYELOMA_SUBGROUPS_up	0.000332447	0.00422266	-0.615634	-2.00713	1	29	POLD2, CKS1B, CDC6, EZH2, PRKDC, PRIM1, UBE2V2, MAZ, PSMD14, TYMS, CHAF1A, MTIF2, XRCC6, EIF2S1, FNTA	Down-regulated
967	CHIANG_LIVER_CANCER_SUBCLASS_PROLIFERATION_up	0.00014518	0.00422266	-0.445625	-2.01319	0	172	TPX2, CDCA5, SLC38A1, RMI2, CENPF, CCNB1, PRR11, PLBD1, PRC1, HJURP, MKI67, KIF20A, PTTG1, CDC6, UBE2C, GALNT7, ANLN, SASS6, RAD51AP1, PM20D2, ELOVL7, CDKN3, CD24, EZH2, TOP2A, E2F8, SOX9, CEP55, CDCA7, ATP1A1, MARCKSL1, TTK, RFC4, AURKB, HELLS, KIF4A, HDAC2, CCNA2, CYBA, CKAP2L, TRIP13, KIF23, B4GALT5, SALL2, SHCBP1, BARD1, GPD1L, PRKCD, TSC1, S100P, AURKA, MECOM, IGF2BP3, FEN1, SKA1, FDCSP	Down-regulated
968	ZHANG_RESPONSE_TO_CANTHARIDIN_dn	0.000159591	0.00422266	-0.522677	-2.01383	0	64	NOP16, POLD2, UQCRH, RRM1, HARS2, IDH3A, FABP5, TRAP1, RPSA, MTHFD1, NDUFB2, QDPR, SUPT16H, PRIM1, NOP56, GTF2H4, ABCC4, POLR2H, ERCC2, RPL29, GTF3A, RUVBL2, PGAM1, EIF3B, FARSA, NDUFS3, RFC5, PFKL, FARSB, COX4I1, TIMM17B, MCM7	Down-regulated
969	HORIUCHI_WTAP_TARGETS_dn	0.00013508	0.00422266	-0.417225	-2.0152	0	301	TPX2, TMEM97, CCNB1, GMNN, PRR11, MELK, GSPT1, PRC1, HJURP, MKI67, CKS1B, LBR, KIF20A, TMPO, CKS2, CKAP2, RRM1, FAM83D, POLA1, PLK1, PTTG1, UBE2C, SNORD60, ANLN, TDP2, RAD51AP1, CDKN3, VRK1, TOP2A, NCAPD2, MRPL48, MYBL2, TM9SF3, TROAP, FBL, CEP55, NCAPG, CDCA8, BUB1, SC5D, RPL13, DKK1, PSRC1, FASN, POLR3G, TTK, DPAGT1, AURKB, HELLS, GLO1, ACAT2, ATL3, BTBD6, SKA3, DNAJC10, TK1, CFAP97, KIF4A, MAG…	Down-regulated
971	RUIZ_TNC_TARGETS_dn	0.000147037	0.00422266	-0.457898	-2.0219	0	142	TMEM97, SLC38A1, EXOSC8, GMNN, MELK, SLC7A1, GINS2, HJURP, EXO1, TMPO, TIPIN, CKS2, DCTPP1, MCM10, CDC6, DKC1, UBE2C, RAD51AP1, RAD54B, NCAPG2, E2F8, ZWILCH, PNP, DKK1, MCM3, RAD54L, DPAGT1, RFC4, AURKB, FHL2, SLC7A5, CCNA2, MET, TRIP13, PRIM1, SHCBP1, BARD1, ODC1, NXN, AUNIP, BLM, DHFR, CCNE2, TYMS, TUBB6, FEN1, NRG1, GPRC5A, CAV1, CD24P4, FOXM1, CDC45, DSCC1, EIF5, MYBL1, KIF2C, CENPU, CCNE1, F…	Down-regulated
972	RHEIN_ALL_GLUCOCORTICOID_THERAPY_dn	0.000132433	0.00422266	-0.413197	-2.02469	0	351	LAPTM4B, TMEM97, GMNN, MELK, SORD, GINS2, PRC1, CKS1B, CKS2, RRM1, PTTG1, TBCA, LRPPRC, MRPS33, RAD51AP1, PPA1, KIF15, DNTT, PSMA6, VRK1, SMC2, PRDX3, APEX1, FABP5, PSMG1, TOP2A, CETN2, LSM5, SERBP1, GGCT, E2F8, STOML2, FBL, CEP55, NCAPG, MIS18A, JADE3, ETFA, MTHFD1, DCTD, GMPS, NME1, PIGP, MARCKSL1, TTK, FANCL, METTL5, CHCHD3, RFC4, GLO1, INTS8, HNRNPA0, POLE2, CYB5A, NHP2, PRKDC, MYO5C, PCNA, E…	Down-regulated
973	WANG_RESPONSE_TO_GSK3_INHIBITOR_SB216763_dn	0.000133387	0.00422266	-0.414558	-2.02496	0	340	NOP16, GMNN, AHSA1, MELK, GINS2, ARHGAP44, EXO1, CKS1B, LBR, TIPIN, DCTPP1, MCM10, UBE2T, POLA1, PUS7, PTTG1, CDC6, DKC1, PLK4, HSPE1, HSPA4L, RAD51AP1, RRP12, SMC2, BRCA1, FABP5, MPP6, E2F8, XRCC2, UMPS, MYBL2, DARS2, HSPH1, NCAPG, WDR4, SLC25A19, BRIP1, BUB1, GART, DIAPH3, FASN, MCM3, RAD54L, MASTL, MCM8, HELLS, HMGCS1, SLC1A4, TFAM, ACAT2, POLE2, DHCR7, GPT2, NHP2, B4GALT2, CHAF1B, TK1, SLC7A5…	Down-regulated
974	REACTOME_RRNA_PROCESSING_up	0.000143205	0.00422266	-0.443034	-2.03129	0	192	BMS1, WDR36, EXOSC8, DDX21, RPS13, NOP58, DKC1, WDR43, RPSA, FBL, LTV1, GNL3, RPL13, IMP3, RPL7, RPL5, RPL8, DDX52, RPL10L, NHP2, KRR1, EXOSC4, WDR3, RPS25, NOB1, UTP20, UTP6, RPS20, NOL11, DDX49, NOP14, RPP25, RPL21, NOP56, BOP1, RPS7, RPS4Y2, RPL35, RPL3, RBM28, WDR75, RPS3, RPL26L1, TSR3, RPL36A, NIP7, ERI1, EMG1, RPS5, RPL29, UTP4, RPS18, RPL23, RIOK1, TRMT10C, EXOSC3, RPS24, DHX37, RRP9, RPL…	Down-regulated
977	TARTE_PLASMA_CELL_VS_PLASMABLAST_dn	0.00013587	0.00422266	-0.423398	-2.03766	0	289	TMEM97, CCNB1, CYCS, GSPT1, MKI67, POLD2, UQCRH, CKS1B, LBR, TMPO, CKS2, RRM1, CBX3, CDC6, UBE2C, PLK4, HSPE1, IPO5, CDKN3, EZH2, CASP6, MYCBP, ABCE1, FABP5, TOP2A, UCHL3, TRAP1, CSE1L, TROAP, SDHB, NKRF, DBI, MTHFD1, DTYMK, PNP, SNRPB2, NME1, YBX1, GART, BCL3, FASN, BAK1, MCM3, TTK, NDUFA9, RFC4, MTHFD2, KPNA2, PRKDC, SLC7A5, CCT2, PCNA, CCNA2, SNRPF, TRIP13, GPI, PSMA5, KIF23, CLCN3, SNRPG, PRI…	Down-regulated
978	EPPERT_PROGENITOR_up	0.000148324	0.00422266	-0.468169	-2.04102	0	131	TMEM97, BMS1, SORD, GINS2, TIPIN, RRM1, POLA1, PLK4, LRPPRC, IPO5, ACSM3, IDH3A, HMGB1, EREG, UMPS, LANCL2, TM9SF3, EIF2AK1, PCTP, MIPEP, TNIK, MTHFD2, POLE2, TXNRD1, DCAF7, PRKDC, SCD, SUPT16H, TRIP13, NOMO1, LDHB, ODC1, WRN, HMGXB4, CSNK2A1, TAL1, RHAG, CCNB2, HAUS6, MSH3, PDZD8, CENPU, CHEK1, RMDN1, AHCYL1, EIF5B, DUT, RYR3, EIF2S1, MEX3B, NDC1, METTL14, HNRNPR	Down-regulated
979	VERNELL_RETINOBLASTOMA_PATHWAY_up	0.000157406	0.00422266	-0.521632	-2.04437	0	70	TMEM97, CDCA5, MELK, TMPO, RRM1, HACD3, RAD51AP1, TFDP1, VRK1, EZH2, HUNK, SLBP, FANCL, RFC4, MCM8, JPH1, PCNA, CNOT6L, BARD1, ESCO2, BLM, SPIN4, FEN1, CHAF1A, CCNE1, FAM111A, DCK, DEK, HMGB2, SKP2, CDCA7L, FAM161A, CENPK, UBR7, FANCA, TCF19, ATAD2, BTG3, MCM7, MCMBP, KLHL42, FBXO5	Down-regulated
980	BENPORATH_ES_1_up	0.000131978	0.00422266	-0.416529	-2.04689	0	366	RAP1GAP2, PARPBP, CDCA5, MGST1, SLC38A1, NOP16, CCNB1, ESF1, DDX21, GMNN, GINS2, DIAPH2, TMPO, MCM10, PUS7, PTTG1, CDC6, EGLN3, CKMT1A, RAD51AP1, MRS2, CD24, RAD54B, LYPLA1, NCAPG2, CBS, AMD1, ABCE1, RCC2, FABP5, SERBP1, ELOVL6, SLC29A1, CSE1L, EPB41L4B, RBBP8, NOLC1, MDN1, COCH, MIS18A, MTHFD1, GNL3, NFE2L3, BUB1, WDHD1, GART, BCL2L12, L1TD1, POLR3G, MCM3, FANCL, RFC4, AURKB, HELLS, HSPD1, MTHFD…	Down-regulated
981	VECCHI_GASTRIC_CANCER_ADVANCED_VS_EARLY_dn	0.000147623	0.00422266	-0.465716	-2.04701	0	138	TFF3, CLRN3, CALML4, CFTR, STARD10, GOT1, SLPI, CYC1, REG1A, XRCC4, AKR1C3, ZBTB7B, LGALS4, TMEM45B, ADH1C, GCNT1, DANCR, ETHE1, MS4A8, SERPINB1, REEP6, LPCAT4, CA13, PIP5K1B, TM4SF20, RHPN2, FXYD3, CLDN23, SNRNP25, DDT, ESCO2, REG3A, RBM19, CAPN13, PCBD1, S100P, SLC4A4, CLDN15, MUC1, TFF2, CENPV, SST, ABHD13, NMU, GCNT3, VSIG2, KCNE3, HMMR, BTNL8, ABCG2, CYB561D1, EPN3	Down-regulated
983	BLUM_RESPONSE_TO_SALIRASIB_dn	0.00013328	0.00422266	-0.420639	-2.05013	0	329	TPX2, CENPF, GMNN, GINS2, PRC1, MKI67, EXO1, KIF20A, TMPO, CKS2, RRM1, CBX3, POLA1, PLK1, PTTG1, CDC6, UBE2C, SRSF2, TSPAN7, PLK4, RAD51AP1, KIF15, TFDP1, CDKN3, VRK1, EZH2, SMC2, BRCA1, MYCBP, PRDX3, HMGB1, TOP2A, LSM5, RAB4A, CSE1L, OPN3, SOX9, MYBL2, TROAP, NCAPG, COCH, MTHFD1, DTYMK, MIPEP, BUB1, FASN, MCM3, TTK, RFC4, AURKB, KIF20B, CDKN2C, FZD2, ID1, POLE2, SRP9, CYB5A, CHAF1B, NTHL1, KPNA2…	Down-regulated
984	REACTOME_HOMOLOGY_DIRECTED_REPAIR_up	0.000153704	0.00422266	-0.493653	-2.05779	0	99	RMI2, BRCC3, POLD2, EXO1, TIPIN, XRCC3, RAD51AP1, BRCA1, BRCA2, XRCC2, RBBP8, BABAM1, BRIP1, POLQ, RFC4, POLE2, UBE2I, PCNA, CCNA2, RAD52, RPA3, RAD51D, DNA2, UBE2V2, BARD1, WRN, BLM, POLE, RAD51C, RNF8, ERCC1, GEN1, FEN1, TOPBP1, RAD17, PPP4C, SPIDR, SLX4, XRCC1, CHEK1	Down-regulated
985	VILLANUEVA_LIVER_CANCER_KRT19_up	0.000144655	0.00422266	-0.459218	-2.0659	0	164	TPX2, MELK, HJURP, MKI67, KIF20A, RRM1, MCM10, POLA1, PTTG1, PLK4, ANLN, KIF15, EZH2, TOP2A, SOX9, KIF18A, DDX27, TROAP, CEP55, NCAPG, TAC1, CWC22, THOC1, CDCA8, TAF5, BUB1, RAD54L, TTK, MCM8, DNM1L, KIF20B, EMC3-AS1, KIF4A, CKAP2L, DNA2, OLA1, SERGEF, KIF23, CDS1, BARD1, C2CD4A, GPD2, GAL3ST1, STMN1, HMGXB4, BLM, STRBP, FZD10, WDR75, GPR157, SLC35D3, DEFA5, NDE1, TDRD9, STIL, PDZD8, KIF2C, GOLGA…	Down-regulated
987	SCHLOSSER_MYC_TARGETS_AND_SERUM_RESPONSE_dn	0.000161812	0.00422266	-0.576062	-2.07959	0	47	DDX21, DKC1, TFDP1, AMD1, FABP5, UCHL3, CSE1L, RPIA, FBL, AKAP1, NOP14, CUL1, ODC1, TIMM17A, HDGF, HSPA9, RRS1, MRPL19	Down-regulated
988	REACTOME_TRANSLATION_up	0.000137836	0.00422266	-0.435637	-2.08107	0	270	RPS13, GSPT1, MRPS33, MRPS18B, EIF4E, PPA1, MRPL36, HARS2, AIMP1, MARS2, MRPL52, MRPL48, RPSA, DARS2, MRPL57, MRPL30, RPL13, EIF3C, MRPL20, RPL7, NARS2, RPL5, RPL8, CARS2, SRP9, RPL10L, VARS2, MRPL11, EIF2B2, MRPS5, MRPS10, RPS25, RPS20, AARS2, EIF2S2, EIF4H, MRPS35, MRPL44, CHCHD1, MRPL34, RPL21, AURKAIP1, EIF3E, MRPL50, MRPS17, MRPL16, PABPC1, EEF1E1, MRPL18, RPS7, SEC61G, RPS4Y2, RPN2, RPL35, …	Down-regulated
990	SLEBOS_HEAD_AND_NECK_CANCER_WITH_HPV_up	0.000157629	0.00422266	-0.528189	-2.09002	0	74	RMI2, KIF15, EZH2, TCAM1P, MLH1, GK5, MEI1, NUP210, RFC4, CDKN2C, ZPBP2, CDKN2A, ASS1, KCNS1, ALG6, TAF7L, RIBC2, WNK3, FMR1, YBX2, ACTL6A, DHFR, POLR2H, TOPBP1, NMU, PDCD10, PRPF38A, CENPW, C9orf40, CDC7, TMEM41A, SOWAHA, C5orf34, CENPK, FAM111B, NDUFB5, SENP5, ABCA17P	Down-regulated
991	MOOTHA_VOXPHOS_up	0.000156519	0.00422266	-0.532543	-2.09432	0	71	NDUFA4L2, CYCS, NDUFAB1, UQCRH, NDUFA5, COX15, CYC1, COX5A, SDHB, GATB, COX7A2, MBD3, NDUFA9, NDUFB2, CYB5A, NDUFA1, NDUFA4, UQCRB, COX6C, SDHD, TMCO6, COX11, COX5B, NDUFS6, UQCRQ, COX10, NDUFA10, COX6A1, NDUFS3, UQCRFS1, UQCRC2, NDUFS1, NDUFB5, COX4I1	Down-regulated
992	DELPUECH_FOXO3_TARGETS_dn	0.000164663	0.00422266	-0.619715	-2.10477	0	35	CENPF, EXOSC8, SLC7A1, PRC1, MKI67, UBE2C, HAX1, APEX1, DTYMK, SLC1A4, MTHFD2, CEBPG, IMPDH2, VEGFA, AURKA, TIAL1, FOXM1, KIF22, AREG	Down-regulated
993	REACTOME_DEFECTIVE_C1GALT1C1_CAUSES_TN_POLYAGGLUTINATION_SYNDROME_TNPS_up	0.000172503	0.00422266	-0.742046	-2.10485	0	17	MUC17, MUC13, MUCL1, MUC3A, C1GALT1, MUC12, MUC15, MUC1, MUC5B, MUC7, MUC21	Down-regulated
994	MOREAUX_B_LYMPHOCYTE_MATURATION_BY_TACI_dn	0.000156617	0.00422266	-0.533953	-2.10555	0	72	SLC38A1, GPR89B, DKC1, TDP2, DDX1, EZH2, LSM5, MALSU1, PSMD8, PRKDC, C1orf131, CCT2, EFTUD2, NOMO3, BARD1, CHCHD1, CEP152, C1QBP, NUDT5, SLC16A1, TYMS, RPL26L1, CBWD1, AIMP2, UTP4, CMC1, CEP295, CHEK1, IP6K2, RAN, ASF1A	Down-regulated
995	MITSIADES_RESPONSE_TO_APLIDIN_dn	0.000140331	0.00422266	-0.448351	-2.11133	0	241	TPX2, TMEM97, SLC38A1, CENPF, FERMT1, CCNB1, MELK, SLC7A1, HJURP, MKI67, LBR, TIPIN, CKAP2, RRM1, CBX3, PTTG1, SMC3, PRKCA, ZFP64, IPO5, TFDP1, LYPLA1, NCAPG2, IMPA2, SMC2, CASP6, TOP2A, AGPAT5, NCAPD2, RAB4A, CSE1L, TEX2, MYBL2, MDN1, NCAPG, DSP, CDCA8, GMPS, BUB1, NUP210, RFC4, HELLS, NFATC2IP, ZNF22, MFHAS1, NSDHL, PRKDC, KIF4A, RSRC1, CCNA2, SCD, AVL9, CNOT1, SUPT16H, TRIP13, WDR76, MTMR4, GP…	Down-regulated
996	FUJII_YBX1_TARGETS_dn	0.000143266	0.00422266	-0.462178	-2.11295	0	187	PARPBP, RDH10, MELK, GINS2, EXO1, CKS1B, TIPIN, RRM1, MCM10, XRCC3, CDC6, PLK4, IPO5, CDKN3, RAD54B, NCAPG2, VRK1, BRCA1, FABP5, TOP2A, PDE3B, MYBL2, CDCA7, SLC25A19, DTYMK, NEIL3, BRIP1, DKK1, MCM3, MASTL, RFC4, HELLS, JPH1, POLE2, RECK, TK1, PRKDC, KIF4A, UBE4B, CENPN, TRIP13, KIF23, FANCD2, CLCN3, EIF4EBP2, PRIM1, SHCBP1, E2F7, PTK2, NOP56, CXCL16, ODC1, CCNF, SLC25A32, BMP7, CBX1, DHFR, MLLT1…	Down-regulated
997	FLORIO_NEOCORTEX_BASAL_RADIAL_GLIA_dn	0.000143885	0.00422266	-0.464773	-2.11529	0	182	TPX2, PARPBP, CDCA5, CENPF, CCNB1, PRR11, MELK, PRC1, HJURP, MKI67, EXO1, CKS1B, KIF20A, CKS2, CKAP2, UBE2T, PLK1, PTTG1, UBE2C, PLK4, ANLN, RAD51AP1, KIF15, CDKN3, NCAPG2, BRCA1, TOP2A, NCAPD2, E2F8, FAM72A, BRCA2, XRCC2, MYBL2, KIF18A, TROAP, FAM72B, NSUN7, CDCA8, UGT8, BRIP1, BUB1, DSN1, PSRC1, TTK, POLQ, AURKB, TRAIP, SKA3, KPNA2, TK1, KIF4A, CKAP2L, CDCA2, KIF23, FANCD2, SHCBP1, ESCO2, CEP15…	Down-regulated
998	BOYAULT_LIVER_CANCER_SUBCLASS_G3_up	0.000143781	0.00422266	-0.464571	-2.1159	0	183	CYB5B, MELK, SLC7A1, HJURP, TIPIN, CBX3, PUS7, CDC6, DKC1, TMEM185B, IPO5, RAD51AP1, FNBP1L, EZH2, AIMP1, NUP155, NCAPD2, ZWILCH, NRAS, CEP55, NCAPG, SRI, GNL3, TRIM31, NME1, BUB1, TTK, ARPC4, GTF3C3, RPL8, DNAJC10, CCT2, MPV17, CCNA2, EIF4A3, NOL11, TRIP13, PRIM1, UBE2V2, MED1, ITGB1BP1, SLC52A2, STMN1, CASC3, MED24, BOP1, PHLDA2, ATIC, SEC61G, ACTL6A, RBM28, GPN1, NUP107, MAPRE1, PSMD14, DHX15,…	Down-regulated
999	WAMUNYOKOLI_OVARIAN_CANCER_LMP_up	0.000138831	0.00422266	-0.445582	-2.11686	0	259	AGR2, EHF, TMEM63A, PLEKHH1, NOP58, MANSC1, RNF128, GSS, GALNT7, TOX3, ST14, STARD10, MARVELD2, IMPA2, CHPT1, TMEM30B, HMGB1, MRPL52, LSM7, ZMYND8, TM9SF3, OXLD1, DBI, AKR1C3, TTC22, COX7A2, GSTK1, FRK, OVOL2, TC2N, ERBB3, TRAPPC5, S100A6, RAB25, ABHD17C, MRAP2, PLEKHJ1, CRB3, CAMK2N1, C4orf19, SERPINB1, GNA11, NDUFAF2, TNIP2, KLF5, PREP, RASEF, FUT2, CTSE, TMEM129, FXYD3, DHTKD1, PSMB10, AURKAIP…	Down-regulated
1000	SCHLOSSER_MYC_TARGETS_REPRESSED_BY_SERUM_up	0.000147254	0.00422266	-0.477031	-2.1176	0	148	NOP16, EXOSC8, CYCS, CBX3, RNF114, HSPE1, NUP58, IPO5, EIF4E, DDX1, SMARCC1, PMPCB, LYPLA1, IDH3A, PSMG1, SERBP1, TGDS, NOLC1, DCTD, PFDN4, U2AF1, NUP210, HSPD1, MTHFD2, TFAM, SRSF8, NUP153, KPNA2, CCT2, HDAC2, SNRPF, EIF4A3, BTF3, NUP93, LDHB, DDX10, CCT8, EEF1E1, ZBTB11, NUFIP1, WRN, PUM3, ACTL6A, COX11, SLC16A1, OAT, COPS2, PSMD14, TIAL1, ZNF330, SERHL, C12orf29	Down-regulated
1002	LEE_LIVER_CANCER_SURVIVAL_dn	0.000145307	0.00422266	-0.469502	-2.11999	0	171	RMI2, CENPF, CCNB1, CKS2, DCTPP1, UBE2T, CBX3, ANLN, SMC2, RCC2, FABP5, RPE, RPSA, ZWILCH, FBL, SLBP, CDCA8, PNP, PFDN4, SNRPB2, NFE2L3, TTK, METTL5, ANXA4, MTHFD2, S100A6, PDCD5, HDAC2, PCNA, CCNA2, LYAR, DSG2, EIF4A3, KLF5, CD2AP, SNRPG, PTMA, RBX1, NOP56, ITGB1BP1, ODC1, RALA, PHLDA2, EEF1E1, RPS7, LRRCC1, ACTL6A, RPL35, CCDC6, RPS3, MAPRE1, TUBA1B, RPL36A, PTBP3, RPS5, TOPBP1, TPRKB, RPS18, B…	Down-regulated
1004	LINDGREN_BLADDER_CANCER_CLUSTER_3_up	0.000134971	0.00422266	-0.440231	-2.13063	0	307	TMEM97, RMI2, CENPF, CCNB1, GMNN, MELK, GINS2, PRC1, EXO1, CKS1B, TMPO, CKS2, CKAP2, FAM83D, PLK1, PTTG1, HENMT1, CMSS1, CDC6, UBE2C, PLK4, FAF1, NCAPG2, VRK1, EZH2, IMPA2, BRCA1, TOP2A, MRPL48, GGCT, E2F8, MYBL2, CEP55, SAC3D1, DBI, MIS18A, CDCA8, GNPAT, PANK1, CPD, BUB1, WDHD1, TOM1L1, CCSAP, RAD54L, NDUFA9, RFC4, MCM8, NXT2, GLO1, HSPD1, CDKN2C, ANXA4, MTHFD2, TRAIP, NEU1, SLC23A1, TXNRD1, CHA…	Down-regulated
1005	YOKOE_CANCER_TESTIS_ANTIGENS_up	0.000164663	0.00422266	-0.62997	-2.1396	0	35	CENPF, WFS1, FABP6, TFDP1, LACTB2, JADE3, PDXDC1, IVD, FAM216A, CAPN3, NPTX2, SLC7A5, TRIP13, STK31	Down-regulated
1006	MARKEY_RB1_ACUTE_LOF_up	0.000141583	0.00422266	-0.458224	-2.14147	0	225	SLC12A2, CCNB1, GMNN, PRC1, HJURP, MKI67, CKS1B, NOP58, KIF20A, TMPO, TIPIN, CKS2, DCTPP1, CKAP2, UBE2T, POLA1, PLK1, CDC6, SRSF2, SMC3, ANLN, SASS6, IPO5, RAD51AP1, TFDP1, CDKN3, AMD1, SMC2, BRCA1, PPP5C, DNPH1, TGDS, E2F8, CSE1L, EREG, BRCA2, DTYMK, BUB1, MCM3, RFC4, HSPD1, NSMCE4A, CHAF1B, KPNA2, TK1, KIF4A, LSM3, CRIP2, HDAC2, PCNA, CCNA2, TRIP13, KIF23, PTMA, PRIM1, STMN1, AHCY, CCNF, DLX1, …	Down-regulated
1007	FERREIRA_EWINGS_SARCOMA_UNSTABLE_VS_STABLE_up	0.000146028	0.00422266	-0.479184	-2.14227	0	156	TPX2, PARPBP, CENPF, CCNB1, ESF1, GMNN, MELK, HJURP, NOP58, TMPO, CKAP2, UBE2T, XRCC3, CDC6, ANLN, PROSER1, KIF15, CDKN3, NCAPG2, SMC2, BRCA1, TBC1D31, TOP2A, NCAPD2, LSM5, KIF18A, CEP55, NCAPG, BRIP1, WDHD1, PPP4R3A, MRPL20, EP400, NDUFA9, SLCO5A1, POLE2, KPNA2, CCNA2, RPA3, KIF23, FANCD2, EAF1, BRD9, DAZAP1, BLM, DHFR, MSH5, MRPL51, ERCC1, FEN1, GJC1, ZNF330, CHAF1A, DSCC1, RBM17, KIF2C, GDAP1,…	Down-regulated
1008	FURUKAWA_DUSP6_TARGETS_PCI35_dn	0.000156519	0.00422266	-0.545074	-2.1436	0	71	TPX2, CENPF, CCNB1, PRC1, HJURP, CKAP2, RRM1, NCAPD2, CEP55, NCAPG, IVD, NEDD4L, RFC4, AURKB, KIF20B, WDR3, CCNA2, MAP7, PRIM1, SHCBP1, PHLDA2, BLM, CCNE2, AURKA, KNSTRN, TUSC1, CCNB2, STIL, MTFR2, WDR5, KIF2C, GOLT1A, RIOK1	Down-regulated
1009	HOLLERN_EMT_BREAST_TUMOR_dn	0.000150943	0.00422266	-0.499912	-2.14463	0	119	EHF, PLEKHH1, POF1B, OCLN, SORT1, BCL11A, ST14, CKMT1A, STARD10, MARVELD2, ELOVL7, CD24, TMEM30B, EPB41L4B, CEACAM1, DSP, KRT15, ERBB3, GRHL1, RAB25, CRB3, EFNA3, MAP7, DSG2, PRSS8, CELSR2, RHPN2, FXYD3, PLEKHG6, EPS8L2, TMEM54, KLC3, JUP, NIPAL2, GRHL2, CLDN3, MYH14, IRF6, SPINT1, CDH1, FAM83H, MYO5B, ELF5, EPB41L5, BSPRY, CCDC120, ILDR1	Down-regulated
1010	WONG_MITOCHONDRIA_GENE_MODULE_up	0.000141924	0.00422266	-0.467604	-2.15565	0	198	NDUFAB1, NDUFA5, LRPPRC, MRPS33, TSPO, MRPS18B, MRPL36, GLUD1, CYC1, AGMAT, GSTO1, HAX1, COX5A, MTRR, SDHB, SLC25A19, MIPEP, COX7A2, NDUFA9, HMGCS2, NDUFB2, MTHFD2, TFAM, CPT1A, CYB5A, NFS1, AIFM1, NDUFA1, MRPL11, SLC9A2, PDHA1, SFXN2, ATP8A1, NDUFA4, UQCRB, COX6C, GPD2, BOP1, MRPS17, SLC25A32, MRPL18, SEC61G, NDUFB10, NDUFA12, HCCS, COX11, COX5B, NDUFS6, UNG, SLC25A22, MCCC2, SLC25A39, SLC16A3, …	Down-regulated
1011	WP_GASTRIC_CANCER_NETWORK_1_up	0.00016975	0.00422266	-0.695818	-2.15691	0	24	TPX2, CENPF, UBE2C, KIF15, TOP2A, MYBL2, KIF20B, LIN9, E2F7, RUVBL1, ACTL6A, S100P, NUP107, AURKA	Down-regulated
1013	SONG_TARGETS_OF_IE86_CMV_PROTEIN_up	0.000160798	0.00422266	-0.585912	-2.16751	0	52	TPX2, RRM1, POLA1, PTTG1, EZH2, SLC29A1, UMPS, MYBL2, PNP, MCM3, TFAM, TK1, PCNA, BARD1, NUP214, BLM, DHFR, RAD51C, UNG, TYMS, TOPBP1, FOXM1, CCNE1, DCK	Down-regulated
1014	COLLER_MYC_TARGETS_up	0.000170561	0.00422266	-0.712484	-2.18132	0	23	CKS2, FABP5, TRAP1, FBL, HSPD1, ASS1, EIF5A, GPI, ODC1, AHCY, C1QBP, HDGF, SLC16A1, POLR2H, GRPEL1	Down-regulated
1016	BHATTACHARYA_EMBRYONIC_STEM_CELL_up	0.000156937	0.00422266	-0.54435	-2.19381	0	82	TPX2, MGST1, CCNB1, DDX21, FAM83D, PTTG1, RCC2, FABP5, ELOVL6, MTHFD1, GNL3, AURKB, RPL7, MTHFD2, KPNA2, TK1, KIF4A, SRSF7, HDAC2, SNRPF, DSG2, IMPDH2, CYP26A1, LDHB, CCT8, SLC16A1, SMS, TUBB6, SEMA6A, OR7E33P, IGF2BP2, RSL24D1, ZNF43, IDH1, RPS24, HSPA4, CRABP1	Down-regulated
1018	REACTOME_RESOLUTION_OF_D_LOOP_STRUCTURES_THROUGH_SYNTHESIS_DEPENDENT_STRAND_ANNEALING_SDSA_up	0.000168606	0.00422266	-0.709055	-2.22053	0	25	RMI2, EXO1, XRCC3, RAD51AP1, BRCA1, BRCA2, XRCC2, RBBP8, BRIP1, RAD51D, DNA2, BARD1, WRN, BLM, RAD51C	Down-regulated
1019	GRAHAM_CML_DIVIDING_VS_NORMAL_QUIESCENT_up	0.000143843	0.00422266	-0.490459	-2.22423	0	176	TPX2, CENPF, CCNB1, GMNN, MELK, SORD, GINS2, GSPT1, PRC1, CKS1B, KIF20A, RRM1, MCM10, CDC6, UBE2C, SLC25A13, RAD51AP1, KIF15, CDKN3, VRK1, EZH2, SMC2, BRCA1, FABP5, TOP2A, LSM5, ELOVL6, E2F8, CSE1L, CEP55, NCAPG, SAC3D1, BUB1, TTK, DPAGT1, RFC4, AURKB, POLE2, KPNA2, TK1, SLC7A5, KIF4A, CCNA2, RPA3, TRIP13, PRG2, SNRNP25, STMN1, ABCC4, DHFR, CCNE2, AURKA, TYMS, TUBB6, FEN1, CPOX, RHAG, CCNB2, HMMR…	Down-regulated
1020	MOLENAAR_TARGETS_OF_CCND1_AND_CDK4_dn	0.000160077	0.00422266	-0.599135	-2.23251	0	54	TPX2, CENPF, MELK, HJURP, KIF20A, FAM83D, CDC6, CEP55, CDCA7, CDCA8, KIF20B, CDKN2C, KIF4A, CENPN, TRIP13, GPALPP1, CDCA2, E2F7, AURKA, TOR3A, PTBP3, ERI1, CDC45, MTFR2, AQP3, MYBL1, KIF2C	Down-regulated
1021	CROONQUIST_IL6_DEPRIVATION_dn	0.00015456	0.00422266	-0.541744	-2.2333	0	92	TPX2, CCNB1, MKI67, CKS1B, CKS2, PLK1, PTTG1, CDC6, UBE2C, PLK4, RRP12, CDKN3, SMC2, BRCA1, TOP2A, MYBL2, DTYMK, GMPS, BUB1, MCM3, AURKB, TRAIP, POLE2, KPNA2, TK1, PCNA, CCNA2, TRIP13, STMN1, CCNF, DHFR, CCNE2, AURKA, TYMS, SBNO2, CHAF1A, CCNB2, FOXM1, STIL, HMMR, CDC45, KIF22, KIF2C, CHEK1	Down-regulated
1022	WP_RETINOBLASTOMA_GENE_IN_CANCER_up	0.000156152	0.00422266	-0.548818	-2.23417	0	86	CCNB1, RRM1, POLA1, SMC3, PLK4, ANLN, FAF1, TFDP1, SMC2, E2F3, HMGB1, TOP2A, MCM3, TTK, RFC4, RBP1, POLE2, PRKDC, KIF4A, PCNA, CCNA2, RBBP7, RPA3, PRIM1, BARD1, STMN1, MDM2, DHFR, CCNE2, POLE, CCDC6, TYMS, CCNB2, CDC45, CHEK1, RABIF, CCNE1, CDC7, DCK, SAP30, HMGB2, SKP2, RFC5	Down-regulated
1023	LEE_EARLY_T_LYMPHOCYTE_up	0.000153257	0.00422266	-0.533872	-2.23516	0	102	CCNB1, PRR11, MELK, PRC1, MKI67, KIF20A, CKS2, MCM10, UBE2T, PTTG1, UBE2C, GALNT7, RAD51AP1, FAM72C, KIF15, DNTT, CDKN3, TOP2A, E2F8, CEP55, NCAPG, LETM1, NEIL3, BUB1, DIAPH3, TTK, SLC1A4	Down-regulated
1024	FISCHER_G2_M_CELL_CYCLE_up	0.000141004	0.00422266	-0.47967	-2.24432	0	227	TPX2, CENPF, CCNB1, MELK, PRC1, HJURP, MKI67, CKS1B, LBR, KIF20A, TMPO, CKS2, CKAP2, FAM83D, ADGRG6, PLK1, PTTG1, UBE2C, PLK4, ANLN, CDKN2D, GOT1, EIF4E, KIF15, NIF3L1, AMD1, DBF4B, ZMYM1, TOP2A, KIF18A, TROAP, RDH11, CEP55, NEIL3, CDCA8, FAM110A, BUB1, STAT1, NEDD4L, PSRC1, CCSAP, TTK, POLQ, FZR1, AURKB, ARHGAP11B, KIF20B, CDKN2C, CYP1A1, KPNA2, MPHOSPH9, ARHGEF39, CCNA2, CKAP2L, BAG3, TRIP13, C…	Down-regulated
1025	BURTON_ADIPOGENESIS_3_up	0.000153586	0.00422266	-0.539117	-2.24905	0	100	CCNB1, PRC1, MKI67, CKS1B, KIF20A, CKS2, RRM1, MCM10, POLA1, PLK1, CDC6, RAD51AP1, TFDP1, EZH2, SMC2, BRCA1, TOP2A, E2F8, SLBP, CDCA7, DTYMK, CDCA8, PNP, BUB1, MCM3, TTK, HELLS, KPNA2, TK1, KIF4A, PCNA, KLF5, IMPDH2, PRIM1, LRP5, CSTF2, CCNF, CCNE2, AURKA, TYMS, TUBB6, FEN1, TOPBP1, CCNB2, CDC45, KIF22, KIF2C, CD4, CDC7, DCK	Down-regulated
1026	ODONNELL_TFRC_TARGETS_dn	0.00014892	0.00422266	-0.518128	-2.24971	0	127	CENPF, CCNB1, PRC1, MKI67, CKS1B, KIF20A, FAM83D, PLK1, CDC6, PLK4, ANLN, FAM72C, CDKN3, RAD54B, TOP2A, BRCA2, MYBL2, HSPH1, CEP55, TAF5, BUB1, DLEU2, DIAPH3, TTK, AURKB, HELLS, POLE2, KIF4A, FUS, CCNA2, NFIA, SCD, CKAP2L, LIN28B, DNA2, B4GALNT3, FANCD2, SHCBP1, PRKCQ-AS1, KCNA1, AURKA, GTSE1, RTP1, CHAF1A, FOXM1, HMMR, FAM181B, C4orf46	Down-regulated
1027	WINNEPENNINCKX_MELANOMA_METASTASIS_up	0.000146349	0.00422266	-0.504535	-2.25339	0	155	PARPBP, CDCA5, CENPF, GLRX2, CCNB1, GMNN, MELK, GINS2, PRC1, EXO1, CKS1B, CKS2, UBE2T, PTTG1, CMSS1, CDC6, ANLN, CDKN3, NCAPG2, SMC2, TOP2A, CEP55, NCAPG, DTYMK, NEIL3, CDCA8, GMPS, NME1, BUB1, FAM216A, RAD54L, RFC4, PHF14, HSPD1, CHORDC1, KPNA2, TK1, MRPS5, RSRC1, MRPS10, PCNA, CENPN, RPA3, OLA1, SNRPG, SHCBP1, GEMIN6, C8orf33, MRPS17, IWS1, PRIM2, DHFR, CCT7, AURKA, KNSTRN, TYMS, GJC1	Down-regulated
1029	GAVIN_FOXP3_TARGETS_CLUSTER_P6_up	0.000155159	0.00422266	-0.55623	-2.27873	0	89	TPX2, CDCA5, CENPF, CCNB1, GINS2, CKS1B, KIF20A, MCM10, PLK1, ST8SIA6, STARD10, NCAPG2, CEP55, NCAPG, DCTD, CDCA8, BUB1, RAD54L, MYO1F, AURKB, VARS2, TK1, CCNA2, IL17RB, ODC1, BMP7, TPI1, AURKA, TYMS, IGF2BP3, EBI3, MTMR7, CCNB2, HMMR	Down-regulated
1030	RHODES_UNDIFFERENTIATED_CANCER_up	0.000159591	0.00422266	-0.59362	-2.28717	0	64	CCNB1, MELK, CKS1B, CKS2, CDC6, UBE2C, CDKN3, EZH2, TOP2A, NCAPD2, MYBL2, NME1, YBX1, MCM3, RFC4, MTHFD2, CEBPG, KPNA2, SLC7A5, PCNA, CCNA2, RPA3, EIF2S2, TRIP13, KIF23	Down-regulated
1031	BENPORATH_PROLIFERATION_up	0.000147798	0.00422266	-0.521988	-2.29092	0	137	CDCA5, CENPF, PRC1, EXO1, CKS1B, LBR, CKS2, UBE2T, PTTG1, CMSS1, ANLN, RAD51AP1, PROSER1, CDKN3, EZH2, TOP2A, COX5A, PFDN2, GGCT, CSE1L, MYBL2, NCAPG, CDCA7, DTYMK, NFE2L3, BUB1, GART, EMC8, MCM3, RAD54L, TTK, RFC4, PDCD5, CEBPG, C1orf112, CHAF1B, KPNA2, HDAC2, PCNA, CENPN, AVL9, SNRPG, CMC2, STMN1, FANCE, NUDT5, RBM8A, MRPL9, PRIM2, AURKA, KNSTRN, SLC25A5, TYMS	Down-regulated
1032	BURTON_ADIPOGENESIS_PEAK_AT_24HR_up	0.000162206	0.00422266	-0.644431	-2.30889	0	45	CCNB1, MELK, PRC1, KIF20A, DCTPP1, RRM1, PTTG1, UBE2C, ANLN, IPO5, SLPI, TOP2A, BUB1, AURKB, TRAPPC5, KPNA2, TK1, CCNA2	Down-regulated
1033	MISSIAGLIA_REGULATED_BY_METHYLATION_dn	0.000152114	0.00422266	-0.543293	-2.3175	0	115	CENPF, EXOSC8, GMNN, PRC1, MKI67, POLD2, LBR, TMPO, RRM1, CDC6, HMGB1P10, UBE2C, KIAA0586, CDKN3, EZH2, SMC2, HMGB1, CSE1L, FBL, DTYMK, TRIM28, GMPS, FASN, RFC4, CDKN2C, ACAT2, DANCR, TK1, PRKDC, CCNA2, RPA3, ENOSF1, KIF23, PRIM1, NRGN, STMN1, DHFR, AURKA, TYMS, MECOM, EBP, CDC25C, CAV1, CYP2J2, FOXM1, ILF3, CDC45, KIF22, CHEK1, DUT, DEK, MDFI, HMGB2, NDUFS3, RFC5, SNRNP40	Down-regulated
1034	KAUFFMANN_MELANOMA_RELAPSE_up	0.000160385	0.00422266	-0.609508	-2.32418	0	61	CENPF, GMNN, GINS2, EXO1, PTTG1, CDC6, RAD51AP1, SMC2, BRCA1, TOP2A, XRCC2, NEIL3, BRIP1, MCM3, RAD54L, POLQ, RFC4, TFAM, PMS2P3, LAMTOR5, PCNA, RPA3, FANCD2	Down-regulated
1035	ZHOU_CELL_CYCLE_GENES_IN_IR_RESPONSE_24HR_up	0.000150943	0.00422266	-0.543172	-2.33021	0	119	PARPBP, CENPF, CCNB1, EXOSC8, MELK, PRC1, EXO1, LBR, KIF20A, DCTPP1, CKAP2, UBE2T, PTTG1, UBE2C, ANLN, CDKN3, EZH2, SMC2, FABP5, TOP2A, E2F8, CSE1L, RBBP8, MYBL2, CEP55, DTYMK, NEIL3, CDCA8, BORA, BUB1, MCM3, RAD54L, TTK, RFC4, MCM8, KPNA2, SMPD4, PCNA, CCNA2, CENPN, TRIP13, KIF23, NUP88, CMC2	Down-regulated
1036	ZHOU_CELL_CYCLE_GENES_IN_IR_RESPONSE_6HR_up	0.000156128	0.00422266	-0.582372	-2.34021	0	80	PARPBP, CDCA5, GMNN, GINS2, EXO1, LBR, KIF20A, DCTPP1, UBE2T, EZH2, SMC2, BRCA1, FABP5, E2F8, MYBL2, CEP55, DTYMK, CDCA8, WDHD1, DSN1, MCM3, RAD54L, TTK, RFC4, CHAF1B, CCNA2, TRIP13, NUP88, CMC2	Down-regulated
1037	ZHAN_MULTIPLE_MYELOMA_PR_up	0.000162206	0.00422266	-0.65346	-2.34124	0	45	TPX2, CCNB1, PRR11, PRC1, CCDC34, MCM10, UBE2T, UBE2C, FAM72C, EZH2, TOP2A, E2F8, ZWILCH, TTK, RFC4, KPNA2, TRIP13, MPC2, AURKA, TYMS, SKA1, CCNB2, FOXM1, DSCC1	Down-regulated
1038	GRADE_COLON_AND_RECTAL_CANCER_up	0.000136986	0.00422266	-0.489547	-2.3457	0	279	LAPTM4B, SLC12A2, TMEM97, RMI2, FERMT1, CCNB1, MELK, HJURP, POLD2, CKS2, RRM1, PLK1, CDC6, SRSF2, HSPE1, PPA1, DDX1, PMPCB, PABPC3, IFRD1, PSMG1, HMGB1, INTS7, ZMYND8, TRAP1, ZDHHC9, PFDN2, TGDS, SOX9, DDX27, FBL, DGAT2, CDCA7, POLR1D, NDUFAF7, MTHFD1, SNRPB, BORA, PTDSS1, EPHB2, MLST8, EMC8, MCM3, PSMB3, METTL5, POLQ, HELLS, GLO1, TCF7, MTHFD2, SKA3, DCAF7, PRKDC, SMPD4, PCNA, EFTUD2, NOB1, LYAR…	Down-regulated
1039	MORI_IMMATURE_B_LYMPHOCYTE_dn	0.000155231	0.00422266	-0.575444	-2.3519	0	88	CDCA5, CCNB1, MELK, PRC1, HJURP, MKI67, CKS1B, TMPO, RRM1, MCM10, UBE2C, CDKN3, EZH2, SMC2, HMGB1, TOP2A, SLC29A1, E2F8, SLBP, CDCA7, PTGR1, MCM3, RAD54L, TTK, CDKN2C, MTHFD2, KPNA2, PCNA, CCNA2, PREP, PRIM1, STMN1, CBX1, SLC16A1, TUBA1B, CCNB2, TXN, XRCC6, CDC45, IQGAP3, CHEK1, SMARCA4, DCK	Down-regulated
1040	WHITFIELD_CELL_CYCLE_LITERATURE_up	0.000162866	0.00422266	-0.660466	-2.35413	0	44	CENPF, CCNB1, KIF20A, CKS2, RRM1, PLK1, CDC6, CDKN2D, CDKN3, BRCA1, TOP2A, BRCA2, SLBP, BUB1, CDKN2C, PCNA, CCNA2, CCNF, DHFR, CCNE2, AURKA, TYMS, CDC25C, CCNB2, CDC45, CCNE1, E2F5	Down-regulated
1042	MUELLER_PLURINET_up	0.00013574	0.00422266	-0.491311	-2.36729	0	292	TPX2, CCNB1, EXOSC8, GMNN, ANAPC1, POLD2, EXO1, CKS1B, NOP58, TMPO, CKS2, DCTPP1, MCM10, POLG2, SRSF2, HSPE1, TDP2, PFDN6, SMARCC1, PSMA6, CASP6, APEX1, POP1, HMGB1, LSM7, LSM5, MPP6, MYBL2, NOLC1, HSPH1, FBL, POLR1D, SOCS1, MTHFD1, PNP, GNL3, TRIM28, U2AF1, GMPS, NME1, SNRPB, BAK1, MCM3, RAD54L, POLQ, RFC4, AURKB, HSPD1, PPID, ERBB3, TRAIP, NUP153, NTHL1, KPNA2, TK1, LSM3, FUS, HDAC2, PCNA, CCNA…	Down-regulated
1043	PUJANA_XPRSS_INT_NETWORK_up	0.000145349	0.00422266	-0.528539	-2.37113	0	161	EXOSC8, SLC7A1, MKI67, LBR, TMPO, RRM1, CBX3, POLA1, UBE2C, SMC3, PLK4, TBCA, RAD51AP1, TFDP1, EZH2, SMC2, BRCA1, TOP2A, NCAPD2, RPIA, BRCA2, RBBP8, MYBL2, SNRPB, RAD54L, RFC4, AURKB, KIF20B, CDKN2C, PMS2P3, NFATC2IP, PRKDC, MTF2, MPHOSPH9, IDH3B, PCNA, CCNA2, ZNHIT3, DNA2, FRG1, STMN1, CD47, CCNF, AATF, CTCF, CNOT3, BLM, CSNK2A1, DHFR, POLE, DDX46, RAD51C, AURKA, UNG, ZNF330, GTSE1, CENPC, CHAF1…	Down-regulated
1044	KANG_DOXORUBICIN_RESISTANCE_up	0.000160798	0.00422266	-0.643148	-2.37925	0	52	TPX2, PRC1, HJURP, MKI67, RRM1, PLK1, CDC6, PLK4, RAD51AP1, CDKN3, NCAPG2, TOP2A, NCAPG, DTYMK, CDCA8, BUB1, POLQ, RFC4, TK1, KIF4A, BARD1, AURKA, TYMS, FOXM1, HMMR, DSCC1	Down-regulated
1045	REN_BOUND_BY_E2F_up	0.000160953	0.00422266	-0.636251	-2.38511	0	56	RRM1, POLA1, PTTG1, CDC6, SMC2, E2F3, MLH1, HMGB1, TOP2A, UMPS, MCM3, RAD54L, TTK, RFC4, SUPT4H1, TK1, PRKDC, CKS1BP7, PCNA, CCNA2, RPA3, BARD1, PRIM2, UNG, FEN1	Down-regulated
1046	DANG_MYC_TARGETS_up	0.000148743	0.00422266	-0.549744	-2.38515	0	126	MGST1, CCNB1, EXOSC8, RPS13, POLD2, CKS2, CBX3, DKC1, UBE2C, SRSF2, HSPE1, EIF4E, IMPA2, PRDX3, APEX1, E2F3, PSMG1, NUP155, NRAS, DBI, MTHFD1, GNL3, NME1, SNRPB, RPL13, EIF3C, FASN, RPL5, AKAP1, HSPD1, PPID, SLC25A3, TK1, SRSF7, PCNA, RPS20, METTL1, PREP, PTMA, DDX10, ODC1, HSPA9, RPL3, PAX3, HNRNPA2B1, TYMS, AIMP2, RPS5, CDC25C	Down-regulated
1047	IRITANI_MAD1_TARGETS_dn	0.000162734	0.00422266	-0.677265	-2.40068	0	43	DCTPP1, IPO5, MRPS18B, PPA1, GGA2, APEX1, E2F8, RPSA, BABAM1, FBL, RPL13, RPL5, ASS1, GPI, AHCY, C1QBP, GAS5, HSPA9, SLC16A1, MYBBP1A	Down-regulated
1048	CHEMNITZ_RESPONSE_TO_PROSTAGLANDIN_E2_up	0.000148302	0.00422266	-0.551811	-2.41301	0	134	TPX2, CENPF, NOP16, CCNB1, PRR11, SLC7A1, ANAPC1, PRC1, HJURP, MKI67, KIF20A, CKS2, PTTG1, CDC6, UBE2C, CDKN3, RAB15, TOP2A, RPIA, NCAPG, DGAT1, BOLA3, TRIM28, GMPS, BRIP1, BUB1, MZT2B, TTK, FANCL, NUP210, RPL8, MTHFD2, SKA3, GEMIN5, TK1, WDR76, BARD1, FEZ1, GRINA, SLC35G2, MICALL1, HSPA9, PCBD1, SLC16A1, SCNM1, AURKA, MLLT11, ERCC1, GJC1, GTSE1, CHAF1A, CCNB2, PVT1, TGS1, CDC45, IQGAP3, CENPU, W…	Down-regulated
1049	WU_APOPTOSIS_BY_CDKN1A_VIA_TP53_up	0.000160798	0.00422266	-0.655899	-2.42642	0	52	TPX2, CCNB1, PRC1, MKI67, EXO1, RRM1, UBE2T, UBE2C, ANLN, SMC2, CEP55, NCAPG, BUB1, WDHD1, MCM3, TTK, AURKB, HMGB1P5, P4HA1, VEGFA, AURKA, HNRNPA2B1, TYMS, MIS18BP1	Down-regulated
1050	WONG_EMBRYONIC_STEM_CELL_CORE_up	0.000134102	0.00422266	-0.499862	-2.4323	0	325	CDCA5, GMNN, CYCS, NDUFAB1, UQCRH, EXO1, CKS1B, KIF20A, CKS2, CKAP2, RRM1, CBX3, PLK1, CDC6, RNPS1, PLK4, HSPE1, MRPS18B, CDKN3, LYPLA1, VRK1, SMC2, TIMM44, APEX1, RCC2, E2F3, TOP2A, NCAPD2, LSM5, PPM1G, ELOVL6, CSE1L, STOML2, MYBL2, RPSA, DARS2, PSMB5, AMOTL2, FBL, NIFK, MID1IP1, CDCA7, ETFA, DTYMK, CDCA8, GNL3, U2AF1, BUB1, WDHD1, GART, EMC8, RPL13, MCM3, TTK, NDUFA9, AURKB, HELLS, HMGN5, GLO1,…	Down-regulated
1051	HOFFMANN_LARGE_TO_SMALL_PRE_BII_LYMPHOCYTE_up	0.000146929	0.00422266	-0.55222	-2.44459	0	145	CDCA5, CCNB1, MELK, GSPT1, PRC1, HJURP, MKI67, CKS1B, KIF20A, TMPO, CKS2, DCTPP1, RRM1, MCM10, UBE2T, POLA1, UBE2C, PLK4, ANLN, IPO5, CDKN3, SMC2, ZNF358, TOP2A, SLC29A1, E2F8, BRCA2, VPS72, NUDC, BUB1, WDHD1, RAD54L, TTK, AURKB, HELLS, CDKN2C, MTHFD2, CAMP, CHAF1B, AZIN1, KPNA2, TK1, KIF4A, CRIP2, CCNA2, DNA2, TRIP13, KIF23, ABR	Down-regulated
1052	SCHUHMACHER_MYC_TARGETS_up	0.000155836	0.00422266	-0.610743	-2.44659	0	78	TMEM97, MGST1, DDX21, CYCS, SORD, POLD2, HSPE1, VRK1, ABCE1, FABP5, UCHL3, TRAP1, TARBP1, RPIA, NOLC1, MTHFD1, RABEPK, NME1, FASN, AKAP1, DANCR, GRSF1, IMPDH2, DDX10, GPD1L, ODC1, AHCY, BOP1, PUM3, RRS1, SLC16A1, POLR2H	Down-regulated
1053	MANALO_HYPOXIA_dn	0.000136986	0.00422266	-0.511095	-2.44895	0	279	TPX2, PARPBP, GLRX2, FERMT1, NOP16, EXOSC8, DDX21, GMNN, MELK, GINS2, PRC1, HJURP, POLD2, EXO1, TIPIN, RRM1, MCM10, CDC6, DKC1, SRSF2, HACD3, RAD51AP1, NIF3L1, VRK1, UCHL5, IDH3A, BRCA1, PSMG1, ELOVL6, CSE1L, TSEN2, UMPS, NOLC1, ZWILCH, GATB, WDR4, LETM1, BOLA2, MTHFD1, NME1, GART, DLEU2, FASN, POLR3G, MCM3, GRWD1, DPAGT1, NARS2, AKAP1, TFAM, ACAT2, ID1, POLE2, TELO2, DHCR7, C1orf112, MPHOSPH9, F…	Down-regulated
1054	YU_MYC_TARGETS_up	0.000163666	0.00422266	-0.700176	-2.45505	0	41	CCNB1, GMNN, MKI67, CKS1B, KIF20A, CKS2, DCTPP1, RRM1, PLK1, ANLN, TFDP1, CDKN3, UCHL5, TOP2A, E2F8, BRCA2, BUB1, KPNA2, PCNA, NUP54, FAM136A, AURKA, CCNB2, TXN	Down-regulated
1055	BLANCO_MELO_BRONCHIAL_EPITHELIAL_CELLS_INFLUENZA_A_DEL_NS1_INFECTION_dn	0.000145307	0.00422266	-0.550867	-2.48738	0	171	CES3, CDCA5, CENPF, PRR11, GINS2, PRC1, HJURP, CCDC34, EXO1, KIF20A, MCM10, UBE2T, PLK1, PTTG1, CDC6, UBE2C, PLK4, ANLN, KIF15, CDKN3, NCAPG2, PPARGC1B, BRCA1, TOP2A, E2F8, LURAP1L, XRCC2, MYBL2, TROAP, CEP55, NCAPG, CDCA7, NEIL3, CDCA8, WDHD1, PSRC1, DIAPH3, RAD54L, TTK, AURKB, PRR15L, TRAIP, SKA3, TK1, KIF4A, CCNA2, PADI3, SFXN2, WDR76, WDR62, CDCA2, PRIM1, SHCBP1, FOXA2, MIPEPP3, FANCB, CBX2, …	Down-regulated
1056	KAMMINGA_EZH2_TARGETS_up	0.000163052	0.00422266	-0.715156	-2.49371	0	40	CDCA5, GMNN, PRC1, MKI67, RRM1, IPO5, DNTT, TFDP1, SMC2, SETDB1, TOP2A, CDCA7, MCM3, AURKB, POLE2, KPNA2, PCNA, RPA3, PRIM1, AHCY, AURKA, TOPBP1, PPP1CC, CCNB2	Down-regulated
1057	GRAHAM_NORMAL_QUIESCENT_VS_NORMAL_DIVIDING_dn	0.000156201	0.00422266	-0.615133	-2.49419	0	84	GMNN, MELK, GINS2, PRC1, CKS1B, RRM1, MCM10, CDC6, RAD51AP1, KIF15, CDKN3, VRK1, SMC2, FABP5, TOP2A, CSE1L, CEP55, NCAPG, SAC3D1, BUB1, RFC4, POLE2, TK1, SLC7A5, PCNA, CCNA2, TRIP13, PRG2, SNRNP25, DHFR, CCNE2, TYMS, FEN1, CCNB2, CDC45, DSCC1, CSF2RB, AQP3, KIF2C, CENPU, CHEK1, CCNE1, GINS1, DUT	Down-regulated
1058	KOBAYASHI_EGFR_SIGNALING_24HR_dn	0.000139665	0.00422266	-0.537047	-2.53533	0	245	TPX2, CCNB1, EXOSC8, GMNN, MELK, GINS2, PRC1, HJURP, MKI67, EXO1, CKS1B, TMPO, TIPIN, CKS2, RRM1, MCM10, POLA1, PLK1, PUS7, CDC6, UBE2C, PLK4, RAD51AP1, KIF15, TFDP1, CDKN3, RAD54B, NCAPG2, VRK1, EZH2, SMC2, BRCA1, ABCE1, FABP5, TOP2A, SLC29A1, E2F8, CSE1L, EREG, SOX9, MYBL2, TCN1, NOLC1, ZWILCH, CEP55, NCAPG, CDCA8, NME1, BUB1, DSN1, DKK1, PSRC1, FAM216A, MCM3, TTK, DPAGT1, RFC4, AURKB, HELLS, P…	Down-regulated
1059	ISHIDA_E2F_TARGETS_up	0.000160694	0.00422266	-0.690976	-2.54302	0	51	CCNB1, PRC1, MKI67, LBR, DCTPP1, RRM1, UBE2T, PTTG1, ANLN, EZH2, SMC2, TOP2A, E2F8, SLBP, CDCA7, BUB1, MCM3, AURKB, CDKN2C, KPNA2, TK1, PCNA, CCNA2, DNA2, TRIP13, PRIM1, STMN1	Down-regulated
1060	WHITEFORD_PEDIATRIC_CANCER_MARKERS_up	0.000151263	0.00422266	-0.601022	-2.55814	0	112	TPX2, CDCA5, CENPF, CCNB1, MELK, GINS2, PRC1, MKI67, CCDC34, CKS1B, TMPO, CKS2, CKAP2, UBE2T, PTTG1, UBE2C, PLK4, RCC2, TOP2A, MYBL2, CDCA7, DTYMK, ADGRL3, CDCA8, NME1, BUB1, SNORD22, TTK, POLQ, RFC4, POLE2, KPNA2, TK1, PCNA, CCNA2, CENPN, PSAT1, CDCA2, ODC1, STMN1, DHFR, AURKA, MLLT11, CCNT1, TYMS	Down-regulated
1061	DUTERTRE_ESTRADIOL_RESPONSE_24HR_up	0.000134771	0.00422266	-0.533091	-2.58244	0	310	TPX2, CDCA5, CHRNA5, GMNN, PRR11, MELK, GINS2, PRC1, MKI67, POLD2, CCDC34, EXO1, TMPO, RRM1, FAM83D, MCM10, UBE2T, POLA1, PLK1, XRCC3, PTTG1, CDC6, UBE2C, BRI3BP, PLK4, ANLN, TFDP1, RAD54B, NCAPG2, VRK1, IMPA2, SMC2, BRCA1, CHPT1, TOP2A, NCAPD2, C21orf58, SLC29A1, E2F8, TFF1, BRCA2, XRCC2, RBBP8, MYBL2, TROAP, ZWILCH, DARS2, CENPJ, CEP55, NCAPG, CDCA7, MIS18A, MTHFD1, NME1, BRIP1, BUB1, WDHD1, DS…	Down-regulated
1062	KONG_E2F3_TARGETS_up	0.000154847	0.00422266	-0.635885	-2.62415	0	93	TPX2, CDCA5, CENPF, CCNB1, MELK, PRC1, HJURP, MKI67, KIF20A, UBE2T, PLK1, CDC6, UBE2C, RAD51AP1, NCAPG2, EZH2, SMC2, BRCA1, E2F3, TOP2A, NCAPD2, RBBP8, NCAPG, BUB1, MCM3, RAD54L, CHAF1B, TK1, SRSF7, CCNA2, RPRD1B, DNA2, PRIM1, SHCBP1, MED1, CCNF, GAS5, CBX2, RPL3, AURKA, TYMS, FEN1, TAL2, HMMR, IQGAP3, KIF2C, CCNE1, FAM111A, CDC7, DCK	Down-regulated
1063	ROSTY_CERVICAL_CANCER_PROLIFERATION_CLUSTER_up	0.000147776	0.00422266	-0.611797	-2.68297	0	136	TPX2, SLC38A1, CENPF, CCNB1, GMNN, MELK, PRC1, HJURP, MKI67, KIF20A, TMPO, CKS2, MCM10, PLK1, PTTG1, CDC6, UBE2C, RAD51AP1, KIF15, EZH2, SMC2, BRCA1, TOP2A, E2F8, MYBL2, CEP55, NCAPG, SAC3D1, DTYMK, CDCA8, BUB1, TTK, DPAGT1, POLQ, AURKB, HELLS, KIF20B, CDKN2A, CHAF1B, KPNA2, TK1, KIF4A, PCNA, CCNA2, RPA3, DSG2, DNA2, TRIP13, KIF23, SHCBP1, CCNF, DHFR, CCNE2, AURKA, TYMS, FEN1, GTSE1, EBP, CCNB2, …	Down-regulated
1064	SOTIRIOU_BREAST_CANCER_GRADE_1_VS_3_up	0.000146972	0.00422266	-0.614886	-2.71955	0	144	TPX2, PARPBP, CENPF, CCNB1, MELK, PRC1, HJURP, MKI67, EXO1, KIF20A, TMPO, CKS2, MCM10, PLK1, PTTG1, UBE2C, PFDN6, KIF15, CDKN3, RAD54B, NCAPG2, VRK1, EZH2, TOP2A, E2F8, MYBL2, TROAP, CEP55, NCAPG, BOLA2, MIS18A, CDCA8, GMPS, NME1, HMCES, BUB1, DSN1, MCM3, TTK, POLQ, RFC4, AURKB, TXNRD1, KPNA2, SLC7A5, KIF4A, CCNA2, SNRPF, CENPN, TRIP13, SNRPG, NUP93, CMC2, SLC52A2, STMN1, STIP1, MRPS17, HCCS, BLM…	Down-regulated

## Sheet: CTMU_C2
	pathway	pval	padj	ES	NES	nMoreExtreme	size	leadingEdge	Enrichment
1	SCHUETZ_BREAST_CANCER_DUCTAL_INVASIVE_up	0.000152625	0.00208018	0.793344	3.87314	0	336	INHBA, BGN, GREM1, SULF1, MFAP2, MNDA, MMP2, TNFAIP6, THBS2, MAF, ANGPTL2, LGALS1, DCN, TIMP3, SPARC, CPQ, CTSK, QKI, NRP1, ZEB1, MYL9, CD93, ADAM12, NOX4, NID2, FCGR2A, FAP, COPZ2, LUM, PRRX1, BICC1, CALD1, PALLD, COL3A1, COL10A1, SLC2A3, EDNRA, RGCC, ASPN, POSTN, COL5A1, COL6A2, COL15A1, DPYD, VCAN, EFEMP2, COL6A1, COL11A1, COL1A2, MXRA5, AKT3, SRGN, C1S, FCGR3B, ITGBL1, FN1, LRRC15, COL6A3, TC…	Up-regulated
2	VECCHI_GASTRIC_CANCER_ADVANCED_VS_EARLY_up	0.000164989	0.00208018	0.807793	3.62347	0	165	INHBA, BGN, SULF1, ANTXR1, SFRP4, COL12A1, TNFAIP6, THBS2, PRDM6, TIMP3, SPARC, QKI, CYP1B1, SFRP2, ADAM12, NOX4, NID2, FAP, PRRX1, SPP1, CTHRC1, CALD1, THBS1, COL10A1, FNDC1, SLC2A3, EDNRA, ANOS1, ZNF532, COL15A1, VCAN, COL11A1, COL1A2, AKT3, ITGBL1, FN1, RAB31, PLXDC2, FBXO32, CMTM3, FBN1, CD163, ARL4C, TRPC1, LOX, IL6, BCAT1, MSR1, CPNE8, CDH11, WWTR1, FSTL1, GAS1, BMPR1B, CHST11, ST3GAL1, NUA…	Up-regulated
3	ANASTASSIOU_MULTICANCER_INVASIVENESS_SIGNATURE_up	0.000176741	0.00208018	0.941873	3.60563	0	63	INHBA, BGN, GREM1, SULF1, SFRP4, MMP2, TNFAIP6, THBS2, ACTA2, LGALS1, DCN, TIMP3, SPARC, CTSK, GLT8D2, ADAM12, NOX4, NID2, FAP, COPZ2, LUM, PRRX1, COL3A1, COL10A1, EDNRA, ASPN, POSTN, COL5A1, COL6A2, VCAN, COL11A1, COL1A2, MXRA5, ITGBL1, FN1, LRRC15, COL6A3, RAB31, FBN1, AEBP1, SERPINF1, LOX, CDH11, COL1A1, NUAK1, SPOCK1, MFAP5, OLFML2B, THY1, SNAI2, COL5A2, EPYC, C1QTNF3, PLAU	Up-regulated
4	BOQUEST_STEM_CELL_up	0.000157356	0.00208018	0.69514	3.28946	0	254	INHBA, FBLN5, MFAP2, FZD7, SFRP4, MMP2, TNFAIP6, FGF7, THBS2, DCN, CTSK, GLT8D2, GRIA3, CRYAB, FAP, LUM, PRRX1, BICC1, BASP1, COL3A1, PRR16, COL5A1, PTGIS, COL6A2, VCAN, COL6A1, COL1A2, MXRA5, C1S, ITGBL1, PLTP, COL6A3, FBN1, AEBP1, SVEP1, PDGFRA, SSPN, C3, SERPINF1, LOX, LRRC17, TIMP1, CDH11, SDC2, HTRA1, C1R, COLEC12, GAS1, MEG3, COL1A1, SGCD, ISLR, GFPT2, SPOCK1, BBS9, MFAP5, FLRT2, MRC2, ROBO…	Up-regulated
5	PICCALUGA_ANGIOIMMUNOBLASTIC_LYMPHOMA_up	0.000160591	0.00208018	0.701906	3.23657	0	200	SULF1, MYLK, ANTXR1, CCDC80, COL12A1, ACTA2, SPARC, CYP1B1, MYL9, CD93, RBPMS, LUM, PRRX1, NEXN, CTHRC1, CALD1, COL3A1, COL15A1, COL6A1, COL1A2, MXRA5, TAGLN, C1S, FN1, LOXL1, FERMT2, FBN1, RSPO3, PDGFRA, C3, SPARCL1, CDH11, WWTR1, PDPN, SLCO2B1, C1R, FSTL1, EMCN, GJA1, OSMR, COL1A1, A2M, IGFBP5, CHI3L1, NNMT, FLRT2, NR2F2, CCL14, FAM20A, RRAS, RASSF4, TPM1, CLMP, C1QB, THY1, RARRES2, SLAMF8, ADG…	Up-regulated
6	TURASHVILI_BREAST_LOBULAR_CARCINOMA_VS_DUCTAL_NORMAL_up	0.000177211	0.00208018	0.82398	3.1713	0	65	INHBA, BGN, SULF1, COL12A1, THBS2, SPARC, ZEB1, SFRP2, ADAM12, PRRX1, CTHRC1, COL3A1, FNDC1, EDNRA, ASPN, POSTN, COL5A1, VCAN, COL11A1, COL1A2, MXRA5, FN1, LRRC15, COL6A3, FBN1, AEBP1, LOX, GPX8, ASAP1, COL1A1, C5AR1, THY1, PLXDC1, COL5A2, SULF2, PLXNC1, COL8A1, HSPA6, CD69	Up-regulated
7	LINDGREN_BLADDER_CANCER_CLUSTER_2B_up	0.000152648	0.00208018	0.642842	3.16193	0	365	AKAP12, DKK3, MYLK, PCDH7, MMP2, CCDC80, THBS2, MAF, ANGPTL2, ACTA2, LGALS1, SPARC, FILIP1L, MYL9, NID2, COPZ2, NRP2, LUM, PRRX1, PALLD, EDNRA, AIF1, FCGR2B, POSTN, COL6A2, COL15A1, COL6A1, CAV1, COL1A2, ALOX5AP, SRGN, C1S, COL6A3, PPP1R18, TCF4, JAM3, PREX1, CLIC4, AEBP1, LAPTM5, SVEP1, PDGFRA, ARL4C, SERPINF1, DAAM2, LBH, RBPMS2, EGR1, PDPN, PECAM1, C1R, PHTF2, COLEC12, MYO5A, CNN3, NUAK1, A2M,…	Up-regulated
8	ONDER_CDH1_TARGETS_2_up	0.000158253	0.00208018	0.648066	3.05257	0	246	BGN, GREM1, FBLN5, MFAP2, MMP2, TNFAIP6, ACTA2, DCN, SPARC, NRP1, ZEB1, CYP1B1, MYL9, ADAM12, NID2, PRRX1, BICC1, COL3A1, PRR16, POSTN, COL5A1, COL6A2, ANOS1, DOCK10, VCAN, COL6A1, COL1A2, SRGN, TAGLN, ITGBL1, FN1, COL6A3, JAM3, RGS4, FERMT2, FBN1, CYTIP, IGFBP4, FGFR1, SERPINF1, LOX, CDH11, WIPI1, SDC2, COL1A1, ANXA6, NNMT, SPOCK1, NID1, TPM1, THY1, DLC1, GYPC, HMOX1, WNT5A, ACKR3, COL5A2, AP1S2…	Up-regulated
9	TURASHVILI_BREAST_LOBULAR_CARCINOMA_VS_LOBULAR_NORMAL_dn	0.000178094	0.00208018	0.765554	2.99972	0	72	BGN, SFRP4, MMP2, COL12A1, THBS2, SFRP2, ADAM12, PRRX1, SPP1, CTHRC1, COL3A1, COL10A1, FNDC1, ASPN, POSTN, COL5A1, VCAN, COL11A1, COL1A2, MXRA5, FN1, LRRC15, COL6A3, FBN1, AEBP1, LOX, ASAP1, COL1A1, C5AR1, COL5A2, SULF2, UGCG, RFTN1, COL8A1, COL4A1	Up-regulated
10	NABA_CORE_MATRISOME_up	0.000156421	0.00208018	0.630272	2.99946	0	265	BGN, FBLN5, MFAP2, COL12A1, TNFAIP6, THBS2, DCN, SPARC, COL27A1, NID2, LUM, SPP1, CTHRC1, THBS1, COL3A1, COL10A1, FNDC1, COL24A1, ASPN, POSTN, COL5A1, COL6A2, ANOS1, COL15A1, VCAN, EFEMP2, COL6A1, COL11A1, COL1A2, MXRA5, SRGN, FN1, COL6A3, FBN1, AEBP1, RSPO3, SVEP1, IGFBP4, PODNL1, SPARCL1, COL1A1, IGFBP5, SPOCK1, MFAP5, NID1, IGFBP2, COL14A1, HAPLN3, LAMA2, SLIT2, HSPG2, OMD, COL5A2, PRG2, FBLN2…	Up-regulated
11	NAKAYAMA_SOFT_TISSUE_TUMORS_PCA1_up	0.000176367	0.00208018	0.741614	2.94092	0	76	TNFAIP6, THBS2, DCN, FCGR2A, FAP, LUM, THBS1, AIF1, FCGR2B, VSIG4, C1S, ITGBL1, PLTP, CD163, C3, TIMP1, GZMK, NNMT, FCGR3A, HLA-DRA, LY96, FCGR1A, C1QB, SLAMF8, EFEMP1, FHL2, IL4R, F13A1, CCL5, CSF1R, SERPINE1, NCKAP1L, HSPA6, GABBR1, MME, GPNMB, ITGAM, SRPX2, CD14, KYNU, HLA-DPA1, C1QA, ARHGAP15, ECM1, SERPINA1, MRC1, BIN2, CFH, CXCL10, CTSC, NCF4	Up-regulated
12	HOLLERN_EMT_BREAST_TUMOR_up	0.000168265	0.00208018	0.671728	2.93157	0	135	MEDAG, MRAS, ANGPTL2, DCN, ZEB1, NRP2, PRRX1, ITGA5, FCGR2B, VEGFC, EFEMP2, VSIG4, FN1, LOXL1, PDGFRA, IGFBP4, VIM, GPR34, MRC2, SPI1, FKBP7, CALU, HSPG2, CSGALNACT2, CFL2, CSF1, AP1S2, GAMT, GLIPR1, HTRA3, F13A1, AXL, CSF1R, MXRA8, STK17B, EMP3, ADGRA2, APBB1, ST8SIA4, SEC23A, LRP1, PLXND1, PHLDB1, SH3GLB1, WAS, OTUD7B, P3H1, DAB2, DNM1, LPAR1, GNB4, ST3GAL2, IL18R1, FCRL2, ANKRD1, MRC1, CYSLTR1…	Up-regulated
13	CROMER_TUMORIGENESIS_up	0.000178891	0.00208018	0.774514	2.9157	0	58	MFAP2, SPARC, FAP, LUM, SPP1, COL3A1, SLC2A3, POSTN, CCL3, COL11A1, COL1A2, FN1, LRRC15, IL6, MMP1, PDPN, TNFAIP3, THY1, COL5A2, MMP3, PLAU, APOBEC3B, SERPINE1, PXDN, PTK7, MYO1B, TPTEP1, UCHL1, MMP9, TNC	Up-regulated
14	ZHU_CMV_24_HR_dn	0.000174429	0.00208018	0.721418	2.90765	0	83	MYLK, THBS2, ACTA2, TIMP3, CYP1B1, THBS1, COL3A1, FLNA, POSTN, PTGIS, COL6A2, VCAN, COL1A2, TAGLN, PDGFRA, LOX, HIVEP2, CDH11, C1R, IGF2, GAS1, COL1A1, IGFBP5, RUNX1, F7, NR3C1, ACKR3, COL5A2, CXCL12, EFEMP1, EPO, IGFBP3, ABL1, SERPINE1, ANXA1, TPM4, ADM, NFIC, FTL, GPX1	Up-regulated
15	KIM_GLIS2_TARGETS_up	0.000174429	0.00208018	0.721407	2.90761	0	83	MFAP2, DCN, SPARC, FCGR2A, LUM, COL3A1, AIF1, TNFSF13B, POSTN, COL15A1, EFEMP2, COL1A2, CMTM3, FBN1, PDGFRA, C3, SPARCL1, VIM, OSMR, COL1A1, FCER1G, NID1, IGFBP2, COL14A1, CXCL12, DPT, CCL5, BCL2A1, HLA-DQB2, HLA-DMB, HLA-DRB1, SERPINE1, MGP, COL4A1, OGN, IFITM3, MFAP4, PSMB9, CD74, COL18A1, TGFBI, ADAMTS2, MMP14, CFH, LTBP2, CXCL10, SPON1, TSC22D1, SOCS3, PDGFRL, CASP4, HLA-DQA1, ICAM1, CCL2	Up-regulated
16	MCLACHLAN_DENTAL_CARIES_up	0.000159008	0.00208018	0.614322	2.88929	0	243	INHBA, MNDA, SFRP4, TNFAIP6, ANGPTL2, S100A8, CD93, FCGR2A, SPP1, SLC2A3, FCGR2B, CCL3, COL15A1, ALOX5AP, SRGN, CD84, FCGR3B, LRRC15, RAB31, FPR1, CYTIP, LAPTM5, IGFBP4, CD163, C3, CLEC2B, CD53, IL6, MMP1, MSR1, TIMP1, STAB1, ABCA1, PECAM1, FCER1G, S100A9, CFI, CHI3L1, NNMT, PTP4A3, MAN2B1, CTSB, CHST15, HLA-DRA, LY96, SAMSN1, C5AR1, TNFAIP3, RGS2, TREM1, C1QB, SLAMF8, IL7R, SOD2, MT2A, CXCL12, G…	Up-regulated
17	ZHU_CMV_ALL_dn	0.000169952	0.00208018	0.674654	2.88318	0	117	MYLK, FGF7, THBS2, ACTA2, TIMP3, CYP1B1, THBS1, COL3A1, FLNA, POSTN, PTGIS, COL6A2, VCAN, COL1A2, TAGLN, PDGFRA, LOX, MMP1, HIVEP2, CDH11, C1R, IGF2, GAS1, COL1A1, IGFBP5, RUNX1, NR2F2, IGFBP2, F7, ACVR2A, NR3C1, ACKR3, COL5A2, CXCL12, EFEMP1, EPO, IGFBP3, ABL1, SERPINE1, ANXA1, MYH9, TPM4, ADM, ZFP36L1, IL6ST, NFIC, FTL, GPX1	Up-regulated
18	WAMUNYOKOLI_OVARIAN_CANCER_LMP_dn	0.000161603	0.00208018	0.624918	2.86952	0	194	SULF1, MNDA, FZD7, CCDC80, MAF, MAP3K8, DCN, TIMP3, CTSK, BNC2, BASP1, CALD1, ZNF532, DPYD, CAV1, C1S, IRF2BPL, TCF4, SRGAP2, FERMT2, LXN, GLI3, DCBLD2, SDC2, HTRA1, GAS1, BNIP2, RUNX1T1, SLC30A4, KDR, FLRT2, IFI16, PKD2, PDGFC, DSE, SLIT2, CSGALNACT2, WNT5A, CFL2, AP1S2, SOD2, EFEMP1, PLSCR4, PMP22, UFSP2, PTGS1, PTPN21, UBE2E2, HOXD8, LIX1L, C1orf198, COL8A1, CLIP4, TMEM45A, SOCS5, RGL1, FBXL7,…	Up-regulated
19	COWLING_MYCN_TARGETS_up	0.000185667	0.00208018	0.804963	2.83027	0	42	GREM1, FBLN5, DSEL, GRIA3, MYL9, CRYAB, COPZ2, SPP1, COL11A1, TAGLN, CNN1, LBH, IGFBP5, PBX3, COX7A1, MMP3, DDAH2	Up-regulated
20	WANG_SMARCE1_TARGETS_up	0.00015625	0.00208018	0.589155	2.8174	0	279	SULF1, MYLK, ANTXR1, PCDH7, MMP2, COL12A1, RHOJ, MAP3K8, ACTA2, DCN, MYL9, NID2, FAP, LUM, PRRX1, NEXN, CTHRC1, CALD1, COL3A1, FNDC1, POSTN, COL5A1, ANOS1, COL15A1, DPYD, VCAN, TAGLN, C1S, FN1, COL6A3, GNG2, PLXDC2, FBXO32, IGFBP4, CLEC2B, BCAT1, LBH, ABCA1, SDC2, GJB2, KLF7, COL1A1, IGFBP5, CFI, CHI3L1, KLHL28, TSHZ2, SPOCK1, PCDHB10, IL1R1, MFAP5, DACT1, NID1, FKBP7, SLC12A8, LPP, GLIPR2, SULF2…	Up-regulated
21	CLASPER_LYMPHATIC_VESSELS_DURING_METASTASIS_dn	0.000185529	0.00208018	0.830903	2.79741	0	34	BGN, RDX, COL3A1, COL5A1, COL6A2, VCAN, COL6A1, COL1A2, COL6A3, LOXL1, FBN1, LOX, TIMP1, CDH11, SDC2, ROBO1, JAM2, LAMA2, COL5A2, CDH2, LTBP1, EMILIN2, LPAR1	Up-regulated
22	SWEET_KRAS_TARGETS_up	0.000176118	0.00208018	0.703427	2.79619	0	77	DKK3, MAP3K8, TIMP3, SPARC, MYL9, CALD1, PALLD, COL5A1, ITGAV, TAGLN, C1S, FERMT2, CHST3, GABARAPL1, LBH, COL1A1, NUAK1, SPOCK1, FLRT2, TPM1, ADAM19, HSPG2, ACKR3, GLIPR1, SGK1, EVL, IGFBP3, JUNB, SERPINE1, COL4A1, CDH4, NCF2, HSPB1, ATP2B4, HGD, BHLHE40, TGFBI	Up-regulated
23	REN_ALVEOLAR_RHABDOMYOSARCOMA_dn	0.000151332	0.00208018	0.563869	2.79612	0	397	INHBA, FBLN5, MYLK, TUSC3, MMP2, THBS2, NRP1, FAP, COPZ2, THBS1, ITGA5, RAB23, COL5A1, ITGAV, COL6A2, VEGFC, VCAN, EFEMP2, COL6A1, CAV1, C1S, ITGBL1, FN1, LOXL1, RAB31, FBN1, LXN, CLIC4, PDGFRA, GPR176, ARL4C, LOX, GABARAPL1, LBH, DCBLD2, TIMP1, WIPI1, DRAM1, HTRA1, FSTL1, GJA1, ASAP1, OSMR, COL1A1, NNMT, GNAI2, CTSB, MRC2, RRAS, PKD2, PDGFC, ACSL4, PRKD1, CALU, PEA15, LPP, RAI14, SMURF2, PLS3, C…	Up-regulated
24	REACTOME_EXTRACELLULAR_MATRIX_ORGANIZATION_up	0.000155015	0.00208018	0.580364	2.79597	0	298	BGN, FBLN5, MFAP2, MMP2, COL12A1, TGFB3, DCN, SPARC, CTSK, COL27A1, ADAM12, NID2, LUM, SPP1, THBS1, COL3A1, COL10A1, ITGA5, COL24A1, ASPN, COL5A1, ITGAV, COL6A2, COL15A1, VCAN, EFEMP2, COL6A1, COL11A1, COL1A2, FN1, COL6A3, LOXL1, JAM3, FBN1, ADAMTS16, LOX, MMP1, TIMP1, SDC2, PECAM1, HTRA1, COL1A1, A2M, ITGA11, MFAP5, KDR, CTSB, NID1, ADAMTS5, COL14A1, ADAM19, SH3PXD2A, JAM2, LAMA2, HSPG2, ITGAX, …	Up-regulated
25	MEBARKI_HCC_PROGENITOR_WNT_up	0.000162866	0.00208018	0.61046	2.78477	0	185	MMP2, CCDC80, TNFAIP6, THBS2, ST6GAL2, DCN, SPARC, BNC2, CYP1B1, ADAM12, FAP, LUM, CTHRC1, COL3A1, FLNA, ITGA5, RGCC, VCAN, COL1A2, FN1, LRRC15, FBN1, RSPO3, ARL4C, LAYN, DCBLD2, KLF7, NAV1, COL1A1, IGFBP5, SPOCK1, IL1R1, FLG-AS1, DACT1, MRC2, SLC12A8, ADAM19, JAM2, COL5A2, GLIPR1, KIF26B, PDLIM7, EPYC, DPT, FHL2, EVI2A, CSF1R, POTEM, NR2F1-AS1, PSTPIP2, MOXD1, SERPINE1, LEF1, MYH9, PAMR1, MMP13,…	Up-regulated
26	NADLER_OBESITY_up	0.000178891	0.00208018	0.736724	2.77344	0	58	BGN, CTSK, CRYAB, FCGR2A, BASP1, FLNA, POSTN, ALOX5AP, PLTP, LAPTM5, SERPINF1, CD53, COL1A1, FCER1G, CTSB, ATP6V1C1, PEA15, C1QB, FBLN2, DUSP1, CSF1R, CD68, TPM4, LRP1, PLD3, PLIN2, CTSD, LGMN, CTSS, HCLS1	Up-regulated
27	REACTOME_COLLAGEN_DEGRADATION_up	0.00017696	0.00208018	0.721351	2.76911	0	64	MMP2, COL12A1, CTSK, COL3A1, COL10A1, COL5A1, COL6A2, COL15A1, COL6A1, COL11A1, COL1A2, COL6A3, MMP1, COL1A1, CTSB, COL14A1, COL5A2, COL4A3, MMP3, COL19A1, COL8A1, MMP13, COL4A1, CTSD, MMP7, ADAM17, MMP9, MMP8, CTSL, COL18A1	Up-regulated
28	VERHAAK_GLIOBLASTOMA_MESENCHYMAL_up	0.000160077	0.00208018	0.594592	2.7538	0	209	LGALS1, CPQ, NRP1, BNC2, ADAM12, FPR3, FCGR2A, COPZ2, THBS1, ITGA5, FCGR2B, COL5A1, SLC11A1, EFEMP2, LAIR1, COL1A2, CYTIP, LAPTM5, LOX, CLEC2B, MSR1, DCBLD2, TIMP1, STAB1, WWTR1, DRAM1, PDPN, COL1A1, CHI3L1, IL1R1, MAN2B1, CTSB, MRC2, LY96, RRAS, CASP8, C5AR1, TNFAIP3, SLAMF8, DSE, EHD2, PLS3, FHL2, SHC1, IL4R, CYBRD1, CSTA, PLAU, FNDC3B, EMP3, SERPINE1, MAFB, ANXA1, MYH9, MFSD1, PTPRC, SWAP70, N…	Up-regulated
29	FARMER_BREAST_CANCER_CLUSTER_4_up	0.000187864	0.00208018	0.939406	2.74329	0	19	THBS2, SPARC, CTSK, FILIP1L, ADAM12, NID2, FAP, COL3A1, COL5A1, COL1A2, FBN1, AEBP1, SERPINF1, CDH11, HTRA1, DACT1, COL5A2	Up-regulated
30	VART_KSHV_INFECTION_ANGIOGENIC_MARKERS_up	0.000164989	0.00208018	0.611289	2.73308	0	160	FZD7, SFRP4, MMP2, THBS2, TGFB3, ANGPTL2, TIMP3, SPARC, NRP1, SFRP2, NRP2, SPP1, ITGAV, COL15A1, VEGFC, PDGFRA, FGFR1, SERPINF1, IL6, MMP1, FLT1, TIMP1, STAB1, PECAM1, CALCRL, OSMR, HIF1A, KDR, PLXDC1, HMOX1, WNT5A, CXCL12, COL4A3, NOS3, TGFB1, PTGS1, ANGPTL6, PDGFA, CCL5, PLAU, F2R, PRL, PTN, PDGFB, CXCL5, CCL11, ADM, EPHA6, IL6ST, FZD9, DLK1, SPHK1, ARL5C, MMP9, TEK, COL18A1, CXCL2, S1PR1, TIE1…	Up-regulated
31	SMIRNOV_CIRCULATING_ENDOTHELIOCYTES_IN_CANCER_up	0.000165044	0.00208018	0.607667	2.7073	0	155	DKK3, MYLK, SPARC, CYP1B1, CD93, FCGR2A, THBS1, SLC2A3, FPR1, BCAT1, LRRC17, EGR1, ABCA1, ADAP2, CHI3L1, CTSB, TLR8, RGS16, C5AR1, ADGRE2, HMOX1, DSE, IRAK3, WNT5A, SMURF2, PDLIM7, PMP22, SHC1, TGFB1, KCNJ15, NBL1, IGFBP3, PLAU, SMAD7, CREM, GLUL, NCF2, HSPA6, ACSL1, ADM, SPHK1, BLVRA, PLIN2, ALOX5, IER3, APOB, CTSL, CD14, BHLHE40, CD58, PROS1, TGFBI, FBP1, SLC23A2, TIE1, AQP9, BST1, P2RY2, RGS3,…	Up-regulated
32	LINDVALL_IMMORTALIZED_BY_TERT_dn	0.00017819	0.00208018	0.693408	2.70422	0	70	AKAP12, ANTXR1, CCDC80, CTSK, ADAM12, FAP, FNDC1, VCAN, FN1, LRRC15, FBXO32, ARL4C, EGR1, PDPN, ISLR, NNMT, SH3PXD2B, PER3, HSPG2, LRRC32, TMEM47, DPT, PLPP3, SLC43A3, ARL4D, PTK7, ADM, CPXM2, MMP7, ITGB5, PAPPA, MDFI, PLOD2, CREG1, LTBP2	Up-regulated
33	MANALO_HYPOXIA_up	0.000160591	0.00208018	0.583373	2.69	0	200	INHBA, BGN, DKK3, MMP2, FILIP1L, SLC2A3, COL5A1, PTGIS, VEGFC, COL1A2, RASSF2, ARL4C, LOX, HIVEP2, ABCA1, HTRA1, NUAK1, SPOCK1, DCHS1, CHST15, RRAS, TPM1, TNFAIP3, GYPC, GJA5, BNIP3, ACKR3, LRRC32, RAI14, PAM, ATXN1, CREB3L2, PTGS1, AXL, IGFBP3, NFATC4, FNDC3B, GLS, SLCO5A1, PELI2, CDKN1C, PDZD2, SERPINE1, ZBTB1, PLEKHO1, PDGFB, TMEM45A, COL4A1, KLF11, ADM, HIF3A, CDH2, GPNMB, ENPP1, CHST1, NINJ2…	Up-regulated
34	HOSHIDA_LIVER_CANCER_SUBCLASS_S1_up	0.000159617	0.00208018	0.573186	2.67623	0	225	ACTA2, LGALS1, CYP1B1, FCGR2A, LUM, COL3A1, FLNA, AIF1, POSTN, CCL3, COL6A2, COL15A1, VCAN, COL6A1, COL11A1, COL1A2, ALOX5AP, AKT3, SRGN, TAGLN, TCF4, RAB31, FBN1, AEBP1, LAPTM5, LOX, CD53, CDH11, FHL3, IGFBP5, HIF1A, GNAI2, IFI16, PKD2, DPYSL2, PEA15, C1QB, THY1, GYPC, IL7R, COL5A2, GLIPR1, PAM, ANXA5, EFEMP1, NBL1, F13A1, CCL5, BCL2A1, GEM, ACP5, ANXA1, MGP, RIN2, LTF, COL4A1, PTPRC, CD8A, PLD3…	Up-regulated
35	PID_INTEGRIN1_PATHWAY_up	0.000177211	0.00208018	0.693829	2.67038	0	65	THBS2, SPP1, THBS1, COL3A1, ITGA5, COL5A1, ITGAV, COL6A2, COL6A1, COL11A1, COL1A2, FN1, COL6A3, FBN1, COL1A1, ITGA11, NID1, JAM2, LAMA2, COL5A2, COL4A3, F13A1, PLAU, CD81, COL4A1, LAMA1, ITGA8, TNC, CD14, COL18A1, TGFBI	Up-regulated
36	REACTOME_ECM_PROTEOGLYCANS_up	0.000176367	0.00208018	0.671633	2.66341	0	76	BGN, TGFB3, DCN, SPARC, LUM, COL3A1, ASPN, COL5A1, ITGAV, COL6A2, VCAN, COL6A1, COL1A2, FN1, COL6A3, COL1A1, LAMA2, HSPG2, ITGAX, COL5A2, COL4A3, TGFB1, SERPINE1, COL4A1, LAMA1, AGRN, ITGA8, TNC, ITGB5, APP, TNN	Up-regulated
37	CROONQUIST_STROMAL_STIMULATION_up	0.000181159	0.00208018	0.721473	2.65726	0	52	SULF1, THBS2, ACTA2, SPARC, LUM, BASP1, CCL3, VCAN, COL6A1, COL1A2, COL6A3, IGFBP4, LOX, IL6, NNMT, RGS2, GUCY1A2, DUSP1, TSC22D3, IGFBP3, SERPINE1, FOSB, PPP1R15A, NFKBIA, IER3, NOTCH3, TGFBI, CXCL2, TGM2, TPM2, IGFBP7, MYOF	Up-regulated
38	PETROVA_ENDOTHELIUM_LYMPHATIC_VS_BLOOD_dn	0.000164989	0.00208018	0.594177	2.65263	0	158	BGN, ACTA2, FAP, BASP1, ITGA5, ITGAV, VEGFC, VCAN, COL6A1, COL1A2, SRGN, TAGLN, PLTP, RGS4, ARL4C, PRKACB, IL6, MMP1, FLT1, NUAK1, ANXA6, NNMT, NR2F2, RRAS, TPM1, HMOX1, RHOB, SMURF2, AHNAK2, EFEMP1, FHL2, IL4R, AXL, PLAU, EMP3, FBXL2, SERPINE1, COL8A1, CDC42EP3, MT1H, AGRN, SRPX, CDH2, IL32, UCHL1, MLLT11, SRPX2, CHST1, IER3, ARHGDIB, MBOAT7, TANK, BMP6, RGS10, ADGRL2, ITGB5, NISCH, PCDH1, TGFBI…	Up-regulated
40	PID_AVB3_INTEGRIN_PATHWAY_up	0.000177179	0.00208018	0.672516	2.64925	0	74	COL12A1, SPP1, COL3A1, COL10A1, COL5A1, ITGAV, COL6A2, COL15A1, COL6A1, COL11A1, COL1A2, FN1, COL6A3, COL1A1, KDR, CASP8, COL14A1, COL5A2, CSF1, COL4A3, CSF1R, COL8A1, ADGRA2, COL4A1, VCL	Up-regulated
41	NABA_COLLAGENS_up	0.000184264	0.00208018	0.74393	2.64503	0	44	COL12A1, COL27A1, COL3A1, COL10A1, COL24A1, COL5A1, COL6A2, COL15A1, COL6A1, COL11A1, COL1A2, COL6A3, COL1A1, COL14A1, COL5A2, COL4A3, COL19A1, COL8A1, COL4A1, COL22A1	Up-regulated
44	LIEN_BREAST_CARCINOMA_METAPLASTIC_up	0.00018577	0.00208018	0.791157	2.64174	0	33	THBS2, TIMP3, SPARC, SFRP2, LUM, PRRX1, THBS1, POSTN, PDGFRA, IGF2, RUNX1T1, ADAMTS5, PKD2, RARRES2, HTRA3, PDGFA, MXRA8, TPM4, IQCA1, COL18A1, PPP1R12A, MCAM	Up-regulated
45	WILCOX_RESPONSE_TO_PROGESTERONE_dn	0.000177778	0.00208018	0.694538	2.63996	0	61	INHBA, MMP2, MYL9, THBS1, COL6A1, COL11A1, COL1A2, FN1, CLIC4, PECAM1, COL1A1, IGFBP5, IGFBP2, XIST, COX7A1, COL5A2, PDLIM7, IGFBP3, CSTA, PLAU, MGP, TNFSF10, MME, ATP2B4, L1CAM	Up-regulated
46	ROZANOV_MMP14_TARGETS_SUBSET_up	0.00018577	0.00208018	0.788518	2.63293	0	33	ANGPTL2, TIMP3, CALD1, COL5A1, COL6A2, COL6A1, FN1, GJB2, HIF1A, NR3C1, SULF2, EFEMP1, PTGS1, PAEP, TNFRSF11B, COL4A1, PLXND1, P3H1, EMILIN2, COL18A1, ANKRD1, CHSY1, HHIP, PLOD2	Up-regulated
47	BERTUCCI_MEDULLARY_VS_DUCTAL_BREAST_CANCER_dn	0.000165426	0.00208018	0.587071	2.62743	0	163	BGN, MYLK, ACTA2, TIMP3, MYL9, ADAM12, FAP, COPZ2, CALD1, FLNA, EDNRA, ACVR1, LIMS2, CAV1, TAGLN, FBXO32, RGS4, FERMT2, RNF152, FSTL1, RUNX1, H19, MSRB3, SPOCK1, SH3PXD2A, GUCY1A2, DLC1, SNAI2, LAMA2, HSPG2, NAV3, SLC4A3, RTN4, PTPN21, NCOA1, MXRA8, RCAN1, PDE5A, KCNMB1, COL8A1, MYH9, CD81, ZNF385D, PTPRZ1, KANK2, PARVA, MYH10, KATNAL1, TMEM61, SLX4IP, ENPP1, PTPN14, SRPX2, TTC28, ITGB5, PLSCR3, …	Up-regulated
48	ROY_WOUND_BLOOD_VESSEL_up	0.000182916	0.00208018	0.721884	2.61433	0	48	SULF1, ANGPTL2, NRP1, NID2, LUM, COL3A1, POSTN, VCAN, RAB31, MMP1, TIMP1, ANXA6, PEA15, PCDH17, THY1, PLXDC1, COL5A2, PLAU, MCTP1, COL4A1, FBXL7, STOM	Up-regulated
49	STEGER_ADIPOGENESIS_dn	0.000187723	0.00208018	0.859917	2.61185	0	22	MMP2, THBS2, TIMP3, POSTN, CMTM3, LOX, PDPN, FSTL1, WNT5A, DPT, OGN, DLK1, PDLIM2	Up-regulated
50	POOLA_INVASIVE_BREAST_CANCER_up	0.000156299	0.00208018	0.542812	2.59077	0	274	INHBA, GREM1, SULF1, MNDA, TNFAIP6, ADAM12, NID2, FPR3, FCGR2A, FAP, COL10A1, AIF1, PRR16, COL5A1, CCL3, VCAN, COL11A1, SRGN, FCGR3B, FN1, LRRC15, COL6A3, LOXL1, RGS4, CYTIP, LAPTM5, RASSF2, CD163, CD53, MMP1, BCAT1, CDH11, GZMK, CALCRL, CHST11, HS3ST3A1, FCER1G, GPR65, FCGR3A, LY96, SAMSN1, FCGR1A, RGS16, BTK, CALU, ADGRE2, SLAMF8, CCDC88A, ITGAX, COL5A2, GLIPR1, EPYC, APOC1, MMP3, EVI2A, LST1, …	Up-regulated
51	SERVITJA_ISLET_HNF1A_TARGETS_up	0.000165344	0.00208018	0.578583	2.58844	0	162	BGN, AKAP12, DKK3, THBS2, TGFB3, MAF, LGALS1, CYP1B1, COL3A1, POSTN, EFEMP2, COL6A1, C1S, FBN1, AEBP1, LAPTM5, SPARCL1, VIM, EGR2, CDH11, HTRA1, C1QB, THY1, MEIS2, SNAI2, COL5A2, CSF1, TMEM47, CXCL12, DPT, EFEMP1, PMP22, KCND2, RBMS3, STK17B, FGF14, ANXA1, PTN, SYCN, GAP43, ELAVL2, PLXND1, IFITM3, MAP4, VIP, SV2B, UCHL1, DNM1, ARHGDIB, FABP7, DUSP26, COL18A1, PRKG2, TGM2, SLC6A15, MCAM, PCDH15, C…	Up-regulated
52	WAMUNYOKOLI_OVARIAN_CANCER_GRADES_1_2_dn	0.000178094	0.00208018	0.659136	2.58273	0	72	SULF1, MNDA, BASP1, DPYD, CAV1, C3, GAS1, CFI, IL1R1, KDR, FLRT2, IFITM2, BNIP3, WSB1, PLSCR4, PTGS1, RARRES1, ELOVL5, HOXD8, CLIP4, RGL1, SBSPON, IGFBP6, RHOQ, FRMD4B, ATP2B4, DAB2, TCEAL3, TTC28, PLSCR3, NISCH, HBB, SLC26A11, PARP6, ST13	Up-regulated
53	REACTOME_ASSEMBLY_OF_COLLAGEN_FIBRILS_AND_OTHER_MULTIMERIC_STRUCTURES_up	0.000178476	0.00208018	0.68039	2.57643	0	60	COL12A1, COL27A1, COL3A1, COL10A1, COL24A1, COL5A1, COL6A2, COL15A1, COL6A1, COL11A1, COL1A2, COL6A3, LOXL1, LOX, COL1A1, CTSB, COL14A1, COL5A2, COL4A3, MMP3, COL8A1, MMP13, COL4A1, PXDN, CTSS, MMP7, MMP9, CTSL, COL18A1	Up-regulated
54	PID_SYNDECAN_1_PATHWAY_up	0.000184366	0.00208018	0.716803	2.57297	0	46	COL12A1, COL3A1, COL10A1, COL5A1, COL6A2, COL15A1, COL6A1, COL11A1, COL1A2, COL6A3, MMP1, COL1A1, COL14A1, COL5A2, COL4A3, TGFB1, CCL5, COL8A1, COL4A1, MMP7, MMP9, SDCBP	Up-regulated
55	GILDEA_METASTASIS_up	0.000186254	0.00208018	0.797309	2.56924	0	28	TIMP3, SPARC, CPQ, MYL9, SRGN, TAGLN, FN1, IGFBP4, IGFBP5, IFI16, BST2, COL5A2, GLIPR1, ARHGDIB, VAMP5, SLC2A10	Up-regulated
56	REACTOME_SMOOTH_MUSCLE_CONTRACTION_up	0.000185839	0.00208018	0.756612	2.56037	0	35	MYLK, ACTA2, MYL9, CALD1, ANXA6, TPM1, GUCY1A2, DYSF, LMOD1, ANXA1, TRIM72, MYLPF, TPM4, VCL, MYL6B, ITGB5, MYL12A, TPM2, PAK2, SORBS1	Up-regulated
57	FRIDMAN_SENESCENCE_up	0.000177179	0.00208018	0.64798	2.5526	0	74	SPARC, FILIP1L, CYP1B1, CRYAB, THBS1, COL1A2, FN1, RAB31, IGFBP4, VIM, MMP1, IGFBP5, IFI16, IGFBP2, RRAS, TNFAIP3, PEA15, RHOB, SMURF2, IGFBP3, CDKN1C, SERPINE1, IGFBP6, CITED2, GSN, ING1, ESM1, NDN, IGFBP7, CREG1	Up-regulated
58	THUM_SYSTOLIC_HEART_FAILURE_up	0.00015083	0.00208018	0.512029	2.54095	0	398	DKK3, MNDA, SFRP4, ZEB1, RDX, GRIA3, VGLL3, NOX4, FPR3, PRRX1, CTHRC1, THBS1, AIF1, ASPN, FCGR2B, SLN, SLC11A1, VCAN, LAIR1, VSIG4, ALOX5AP, SRGN, C1S, ITGBL1, LOXL1, JAM3, PLXDC2, FBXO32, RGS4, LXN, CLIC4, LAPTM5, CLEC2B, CD53, BCAT1, MSR1, SDC2, CALCRL, GPX8, FCER1G, CNN3, S100A9, CFI, PPFIBP1, EXOC5, CTSB, GPR34, FCGR3A, HLA-DRA, LY96, PDGFC, CALU, C1QB, OMD, PPP1R3B, PDLIM7, CXCL12, DPT, PLSC…	Up-regulated
59	JECHLINGER_EPITHELIAL_TO_MESENCHYMAL_TRANSITION_up	0.000177557	0.00208018	0.656636	2.53306	0	66	INHBA, MMP2, DCN, SPARC, S100A8, CYP1B1, COL3A1, COL6A2, COL6A1, PDGFRA, VIM, SDC2, HTRA1, GAS1, HIF1A, RRAS, ACKR3, PMP22, PTGS1, CD68, PHGDH, PDGFRB, MMP13, IFITM3, CDH2, DAB2, TNC, CXCL2, UPP1, CFH, DDR2, TNXB, PTPN22, PCOLCE, CTSZ, ASNS, BCL3, CCL2	Up-regulated
60	IGLESIAS_E2F_TARGETS_up	0.000166085	0.00208018	0.573768	2.52852	0	143	MFAP2, ANGPTL2, ACTA2, LGALS1, DCN, SPARC, NID2, LUM, COL3A1, POSTN, COL6A2, COL15A1, COL1A2, COL6A3, LAPTM5, IGFBP4, C3, SERPINF1, CD53, GJA1, COL1A1, CNN3, IGFBP5, GNAI2, PKD2, C1QB, RHOB, COL5A2, FBLN2, PMP22, EVL, CDKN1C, TMEM45A, COL4A1, EED, CDO1, OGN, TYROBP, CSRP1, NFKBIA, DAB2, CD74, CTSS, GSN, APLP2, TANK, COL18A1, ZFAND5, C1QA, DSTN, ADIPOQ, MRC1, MORF4L1, ENPP2, CRTAP, SKP1, ITGB1, BA…	Up-regulated
61	TONKS_TARGETS_OF_RUNX1_RUNX1T1_FUSION_ERYTHROCYTE_up	0.000165618	0.00208018	0.568138	2.52424	0	152	MAF, RBPMS, VCAN, LAIR1, COL1A2, VSIG4, PLTP, JAM3, CD163, ADAMTSL4, CLEC5A, PTP4A3, PNRC1, IFI16, FCGR1A, TREM1, SLAMF8, IRAK3, DKK2, ATXN1, SIRPAP1, PDGFA, FNDC3B, BCL2A1, OLR1, CXCL5, CREM, PXDN, IL1RAP, ACSL1, RHOQ, HSPB1, TLR7, GPNMB, UCHL1, CH25H, MAN1A1, CTSL, FABP3, AMIGO2, ECM1, CRHBP, SERPINA1, SLC1A3, EXT1, APP, VAT1, PPARD, UPP1, TRIB3, KLF2, ENPP2, SCG5, TMEM176A, IL1RN, MYOF, CPM, A…	Up-regulated
62	RODWELL_AGING_KIDNEY_NO_BLOOD_up	0.000160591	0.00208018	0.545017	2.52169	0	207	INHBA, DKK3, ANTXR1, MRAS, COL27A1, LUM, CTHRC1, COL3A1, COL5A1, COL15A1, VEGFC, COL1A2, TAGLN, C1S, FN1, COL6A3, LOXL1, FBN1, AEBP1, C3, SPARCL1, MSR1, TIMP1, STAB1, CDH11, DRAM1, C1R, GPX8, OSMR, COL1A1, NUAK1, ISLR, A2M, NNMT, ARHGAP1, TPM1, COL14A1, PDGFC, CALU, C1QB, GFRA1, TMEM200A, PAM, BHLHE41, RFTN1, UBE2Q2P6, AXL, GGT5, RARRES1, RBMS3, CHRNA3, TNFRSF11B, DPCD, MOXD1, PPP1R14A, ANXA1, LT…	Up-regulated
63	MIYAGAWA_TARGETS_OF_EWSR1_ETS_FUSIONS_dn	0.000159923	0.00208018	0.541612	2.52129	0	219	CCDC80, FGF7, SPARC, NRP1, GLT8D2, FILIP1L, ADAM12, VGLL3, NID2, LUM, PRRX1, COL3A1, SLC2A3, PRR16, COL5A1, CCL3, VCAN, PLPP4, COL11A1, COL1A2, IL6, LRRC17, DCBLD2, VSTM4, OSMR, MAB21L2, GFPT2, CHI3L1, ITGA11, ARHGAP1, IL1R1, NR2F2, ADAMTS5, ADAM19, NR3C1, MEIS2, BNIP3, AFF3, RFTN1, EIF5A2, IGFBP3, TNIK, PLAU, NREP, RBMS3, PLPP3, SVIL, TNFRSF11B, PRDM1, SMAD7, COL8A1, CDC42EP3, ELL2, ADM, SLC8A1,…	Up-regulated
64	NABA_PROTEOGLYCANS_up	0.000185839	0.00208018	0.744665	2.51994	0	35	BGN, DCN, LUM, ASPN, VCAN, SRGN, PODNL1, SPOCK1, HAPLN3, HSPG2, OMD, PRG2, EPYC, OGN	Up-regulated
65	NAKAMURA_ADIPOGENESIS_LATE_dn	0.000185529	0.00208018	0.745234	2.50899	0	34	DKK3, THBS2, TIMP3, CALD1, POSTN, ITGAV, COL15A1, LOX, TPM1, RAI14, GLIPR1, TMEM47, CXCL12, ZNF133, SERPINE1	Up-regulated
66	CHEN_ETV5_TARGETS_SERTOLI_up	0.000188218	0.00208018	0.794172	2.50526	0	26	ANGPTL2, FCGR2A, FCGR2B, IGFBP4, CD53, IL6, XIST, C1QB, CXCL12, MS4A6A, CLEC7A, ELAVL2, GPNMB	Up-regulated
67	WONG_ENDMETRIUM_CANCER_dn	0.000176585	0.00208018	0.633615	2.50487	0	75	SFRP4, DCN, GLT8D2, VGLL3, COL3A1, FBXO32, FBN1, PDGFRA, TRPC1, RUNX1T1, FLRT2, NID1, ADAMTS5, EHD2, COX7A1, EFEMP1, LMOD1, PLEKHH2, CD248, SLC24A3, IGFBP6, OGN, SRPX, MME, MICU3, EFS, TSHZ3, P2RY14, PEG3, SLC18A2, TNXA, CNRIP1, ADGRD1, PAPPA, NDN, F10, XYLT1, CTSW, WNT4, SCARA5, HGF, EDNRB	Up-regulated
68	PASINI_SUZ12_TARGETS_dn	0.000154369	0.00208018	0.51885	2.50407	0	301	SULF1, MEG8, ACTA2, LGALS1, FILIP1L, CYP1B1, CRYAB, VGLL3, CALD1, THBS1, PALLD, COL3A1, FLNA, COL5A1, ITGAV, VCAN, COL11A1, CAV1, COL1A2, TAGLN, FN1, PPP1R18, GNG2, CMTM3, CNN1, GLI3, IGFBP4, ARL4C, VIM, DCBLD2, WWTR1, KLF7, COLEC12, BNIP2, MEG3, SMO, COL1A1, NUAK1, IGFBP5, CRMP1, TPM1, DPYSL2, ACSL4, LPAR4, PEA15, SH3PXD2A, LPP, RHOB, CFL2, GLIPR2, CSF1, PDLIM7, ANXA5, TMEM47, EFEMP1, PMP22, PHL…	Up-regulated
69	RIGGI_EWING_SARCOMA_PROGENITOR_dn	0.000162946	0.00208018	0.548049	2.49286	0	181	SFRP4, FGF7, DCN, NRP1, GLT8D2, BNC2, ADAM12, NRP2, LUM, PRRX1, BICC1, COL10A1, PTGIS, COL6A2, DPYD, VCAN, C1S, GNG2, LXN, SVEP1, PDGFRA, BDKRB1, C1R, IGF2, MAB21L2, GFPT2, CHI3L1, IL1R1, SLC12A8, COL14A1, BEND6, GXYLT2, GULP1, CXCL12, PIEZO2, ETV1, KCNJ15, PTGS1, RARRES1, PSD3, CLDN11, NREP, SCRG1, PLPP3, PPP1R3C, MOXD1, PTN, MRGPRF, PAMR1, IGFBP6, STEAP1B, SRPX, MME, GPC6, ARNTL2	Up-regulated
70	THUM_MIR21_TARGETS_HEART_DISEASE_up	0.000190331	0.00208018	0.878732	2.48771	0	17	BGN, TGFB3, LUM, ASPN, POSTN, COL1A2, SVEP1, LOX, COL1A1, COL5A2, RCAN1	Up-regulated
71	GAUSSMANN_MLL_AF4_FUSION_TARGETS_E_up	0.000172891	0.00208018	0.602074	2.48717	0	96	MEDAG, SULF1, SFRP2, CRYAB, CTHRC1, RGCC, ASPN, POSTN, C1S, SVEP1, PDGFRA, CDH11, ABCA1, COLEC12, ISLR, PDE10A, CCL5, RNF144B, NREP, NIPAL4, SFRP1, PTN, GRB14, ADM, FOXRED2, MYO1B, ENPP1, L1CAM, RCAN2, FABP3, CLEC11A, TGFBI, CARNS1, GCA, SLC5A7	Up-regulated
72	HUANG_DASATINIB_SENSITIVITY_up	0.000176367	0.00208018	0.626763	2.48547	0	76	PCDH7, CALD1, ITGA5, COL5A1, DPYD, CAV1, PPP1R18, LAYN, DCBLD2, FSTL1, OSMR, NNMT, IFI16, PDGFC, SNAI2, RAI14, PLAU, DUSP10, ANXA1, SOCS5, MAML2, CDC42EP3, ELK3, CAV2, PARVA, ELL2, PSMB9, ARHGAP29, TGFBI, EXT1, MYO10, CCDC50, UPP1	Up-regulated
73	NAKAMURA_ADIPOGENESIS_EARLY_dn	0.000185529	0.00208018	0.737077	2.48153	0	34	THBS2, TIMP3, CALD1, POSTN, ITGAV, COL15A1, RGS4, LOX, TPM1, RAI14, GLIPR1, TMEM47, TNFRSF11B, ZNF133, SERPINE1, STK38L	Up-regulated
75	DURAND_STROMA_S_up	0.000155063	0.00208018	0.516535	2.47988	0	289	MEDAG, MMP2, CCDC80, MAF, PYGO1, SFRP2, GRIA3, ADAM12, NID2, SPP1, COL3A1, POSTN, COL6A2, COL1A2, A4GALT, LOXL1, RGS4, SVEP1, RASSF2, PDGFRA, SERPINF1, RBPMS2, CALCRL, OSMR, COL1A1, ST3GAL1, IL1R1, FAM20A, ROR2, B3GALNT1, EBF3, ADAM19, PRKD1, LPAR4, SNAI2, CA5B, NOVA1, SULF2, TMEM47, CXCL12, PMP22, HTRA3, IL4R, TSC22D3, FABP4, CCL5, ATP10A, FAT4, PLPP3, EFNA5, FGF10, CD248, CDKN1C, PDGFRB, PTN, M…	Up-regulated
77	JI_CARCINOGENESIS_BY_KRAS_AND_STK11_dn	0.000190331	0.00208018	0.873801	2.47375	0	17	MMP2, THBS2, DCN, LUM, VEGFC, ITGBL1, FN1, LOXL1, FGFR1, TIMP1, PDGFRB	Up-regulated
79	BURTON_ADIPOGENESIS_PEAK_AT_0HR_up	0.000178476	0.00208018	0.650887	2.46471	0	60	THBS2, TGFB3, ACTA2, TIMP3, CTSK, SFRP2, MYL9, CRYAB, SPP1, VEGFC, COL11A1, PDGFRA, GAS1, ASAP1, RUNX1T1, TPM1, CSF1, NREP, COL8A1, PDGFRB, MGP, OGN, MAP4, PLIN2, DAB2	Up-regulated
80	WP_MIRNA_TARGETS_IN_ECM_AND_MEMBRANE_RECEPTORS_up	0.000188041	0.00208018	0.818841	2.45705	0	21	THBS2, THBS1, COL3A1, COL5A1, COL6A2, COL6A1, COL1A2, FN1, COL6A3, SDC2, ITGA11, COL5A2, COL4A1	Up-regulated
81	PID_INTEGRIN3_PATHWAY_up	0.000185667	0.00208018	0.698537	2.45607	0	42	SPP1, THBS1, ITGAV, COL1A2, FN1, FBN1, PECAM1, COL1A1, KDR, THY1, COL4A3, PLAU, PDGFRB, PDGFB, COL4A1, SPHK1, L1CAM, TNC, TGFBI	Up-regulated
82	LIAN_LIPA_TARGETS_3M_up	0.000176741	0.00208018	0.641104	2.45424	0	63	FCGR2A, FCGR2B, SLC11A1, MSR1, MYO5A, FCER1G, S100A9, CTSB, XIST, C1QB, TREM2, HMOX1, FKBP5, MS4A6A, CSTA, CD68, ACP5, MAFB, MPEG1, DNMT3A, TLR7, GPNMB, FABP7, MMP8, STEAP4, C1QA, RGS1, MS4A7, AAR2, SEMA7A, C1QC, IGSF6, MMP19	Up-regulated
83	LEE_NEURAL_CREST_STEM_CELL_up	0.000165948	0.00208018	0.554982	2.45274	0	146	BGN, LGALS1, DCN, FAP, NRP2, LUM, SPP1, COL3A1, EDNRA, POSTN, SLN, DPYD, COL1A2, PDGFRA, SGCD, IGFBP5, RUNX1T1, DACT1, NR2F2, IFI16, XIST, COL14A1, DLC1, GYPC, SNAI2, MEF2C, TMEM204, RHOB, AP1S2, PMP22, SHC1, SCRG1, MOXD1, LPAR6, ANXA1, ROR1, GAP43, ELK3, PCBP4, DNAJC1, LITAF, L1CAM, GSN, KCNN2, PAX3, TGFBI, ZEB2, NRXN1, NHLH2, MDFI, ZCCHC24, NPR3, SORBS1, IGFBP7	Up-regulated
86	WOO_LIVER_CANCER_RECURRENCE_up	0.000172236	0.00208018	0.58389	2.44315	0	104	CRYAB, FLNA, POSTN, ANOS1, COL11A1, COL1A2, COL6A3, FGFR1, LOX, CCND3, MAB21L2, COL1A1, DPYSL2, RGS2, TREM2, MEF2C, SLIT2, BHLHE41, PMP22, TGFB1, EVL, IGFBP3, PDGFA, PLAU, GEM, MGP, TPM4, DAB2, RGS10, ZEB2, SGCB, EXT1, TPM2, RGS1, PLAGL1, TNFRSF25, ENPP2, CD24P2, COL9A2, ZNF354A, CRIP1, TGFB2, FGD6, FZD1, CXCL8, EFHC1, DDR1, CCNI, JAG1, CCL2, TPBG, MARCKS, GAS7, GPC4, HKDC1, TLK2	Up-regulated
87	GU_PDEF_TARGETS_up	0.00017819	0.00208018	0.626113	2.44178	0	70	DKK3, ZEB1, ITGA5, COL5A1, COL6A2, DOCK10, COL6A1, FN1, COL6A3, TCF4, VIM, CDH11, MAP4K4, SDC2, COL1A1, MAPKBP1, HIF1A, VEGFB, SNAI2, WNT5A, COL5A2, TGFB1, SERPINE1, LEF1, COL4A1, CDH2, TNC, TGFBI, SERPINA1	Up-regulated
88	TSENG_ADIPOGENIC_POTENTIAL_dn	0.00018406	0.00208018	0.676071	2.43669	0	47	DKK3, NRP1, SFRP2, COL6A1, COL6A3, SPARCL1, GJA1, IL1R1, B3GALNT1, EBF3, SNAI2, FABP4, PLPP3, HSBP1, RAMP2, IL6ST, TMEM185A, ENPP1, LPAR1, PAX3, TGFBI	Up-regulated
89	WESTON_VEGFA_TARGETS_6HR_up	0.000182916	0.00208018	0.672251	2.43459	0	48	BGN, MMP2, NID2, FAP, POSTN, VCAN, COL6A1, COL1A2, C1S, COL6A3, FHL3, NNMT, ROR2, THY1, SGCE, GEM, MGP, TNFSF10, ANKRD1, FBP1, BCKDHA, ART4	Up-regulated
90	CHIANG_LIVER_CANCER_SUBCLASS_CTNNB1_dn	0.00016488	0.00208018	0.542148	2.43405	0	166	BGN, SULF1, CCDC80, THBS2, MYL9, LUM, CTHRC1, BASP1, COL3A1, TNFSF13B, ASPN, COL5A1, VCAN, COL1A2, MXRA5, PLTP, COL6A3, LOXL1, CMTM3, LXN, CYTIP, AEBP1, EGR2, KCNT2, TIMP1, EGR1, GLIS3, COL1A1, CHST11, ISLR, ACSL4, VNN2, IL7R, UGCG, CXCL12, EFEMP1, PMP22, EVI2A, GEM, ACP5, MOXD1, SERPINE1, TMEM45A, PAPLN, NAV2, MCC, SPHK1, SRPX, GPNMB, MMD, CRP, TNFSF4, MMP9, RCAN2, MAP3K5, AMIGO2, FBP1, ZNF83, M…	Up-regulated
91	LENAOUR_DENDRITIC_CELL_MATURATION_dn	0.000168435	0.00208018	0.561668	2.43134	0	126	NCF1, CTSK, S100A8, FCGR2A, SLC11A1, CYTIP, CD163, C3, SERPINF1, CLEC2B, BCAT1, STAB1, SDC2, HTRA1, FCER1G, S100A9, CHI3L1, C5AR1, SOD2, PDLIM7, IL6R, EVI2A, LST1, CSF1R, OLR1, EMP3, CXCL5, TLR1, ELK3, S100A12, NFKBIA, RTN1, LGMN, CYBB, IER3, ARHGDIB, MMP9, CD14, KYNU, FBP1, CXCL2, ZFP36L2, BST1, SERPINA1, SLC1A3, CD37, NINJ1, SOS2, SPINK1	Up-regulated
92	WP_LUNG_FIBROSIS_up	0.000178476	0.00208018	0.641285	2.42835	0	60	GREM1, MMP2, FGF7, SPP1, CCL3, IL6, TIMP1, HMOX1, MT2A, TGFB1, PDGFA, CCL5, PLAU, SMAD7, NFE2L2, PDGFB, CCL11, IL12B, MMP9, CXCL2, FGF2, SERPINA1, SKIL, PARN, CMA1, HGF, EDN1, SFTPA2, IL4, CXCL8, CCR3, IGF1, CCL2	Up-regulated
93	TSAI_RESPONSE_TO_RADIATION_THERAPY_up	0.000186776	0.00208018	0.74341	2.42773	0	30	THBS1, COL6A2, VEGFC, COL6A1, COL6A3, IL6, EGR1, A2M, IGFBP5, BST2, TNFRSF11B, SERPINE1, COL4A1, CD69	Up-regulated
94	SCHAEFFER_PROSTATE_DEVELOPMENT_48HR_dn	0.000150557	0.00208018	0.48747	2.42095	0	400	INHBA, GREM1, SULF1, MFAP2, ANTXR1, CCDC80, RHOJ, TGFB3, FILIP1L, ZEB1, NRP2, PRRX1, THBS1, PALLD, EDNRA, IRF2BPL, TCF4, ABCC9, LOXL1, PREX1, RASSF2, RNF152, IGFBP4, ARL4C, SERPINF1, SPARCL1, PTHLH, BCAT1, HIVEP2, SDC2, SLCO2B1, KLF7, GAS1, NUAK1, JUND, RUNX1, RUNX1T1, SH3PXD2B, IL1R1, CTSB, XIST, RASSF4, PKD2, EBF3, BST2, SHISA2, PLXDC1, GYPC, SLIT2, GLIS2, KIF26B, PPP1R3B, PDLIM7, MMP3, CD83, D…	Up-regulated
95	SASAI_RESISTANCE_TO_NEOPLASTIC_TRANSFROMATION_up	0.00018406	0.00208018	0.671592	2.42055	0	47	BGN, FBLN5, TGFB3, TAGLN, FBN1, SDC2, FSTL1, COL1A1, COL5A2, FBLN2, CXCL12, TNFRSF11B, JUNB, PDGFRB, IL6ST, CSRP1, IL1RL1, P3H1, RGS10, APP, ADAMTS1, PLOD2, LTBP2, EDN1, PCOLCE, DDR1, CEBPD	Up-regulated
96	KEGG_FOCAL_ADHESION_up	0.000161238	0.00208018	0.524699	2.41243	0	196	MYLK, THBS2, MYL9, SPP1, THBS1, COL3A1, FLNA, ITGA5, COL5A1, ITGAV, COL6A2, VEGFC, COL6A1, COL11A1, CAV1, COL1A2, AKT3, FN1, COL6A3, PDGFRA, FLT1, CCND3, COL1A1, ITGA11, KDR, VEGFB, PDGFC, LAMA2, COL5A2, SHC1, PDGFA, CRKL, PDGFRB, PRKCG, PDGFB, PARVG, COL4A1, MYLPF, PIK3R5, HRAS, VCL, PARVB, FYN, CAV2, PARVA, LAMA1, RAP1A, ITGA8, TNC, ITGB5, MAP2K1, PPP1R12A, MYL12A	Up-regulated
97	PETRETTO_CARDIAC_HYPERTROPHY_up	0.000185529	0.00208018	0.715505	2.4089	0	34	ACTA2, ASPN, TAGLN, FN1, LOXL1, FBN1, FSTL1, MFAP5, NID1, COL5A2, OSBPL8, EFEMP1, RTN4, IGFBP3, ANXA1, OGN, ST3GAL6, ENPP2, ARID5B	Up-regulated
98	KEGG_LEISHMANIA_INFECTION_up	0.00017819	0.00208018	0.617341	2.40757	0	70	TGFB3, NCF1, FCGR2A, FCGR2C, FCGR3B, C3, FCGR3A, HLA-DRA, FCGR1A, HLA-DRB5, TGFB1, CR1, HLA-DMB, HLA-DRB1, IL12B, NCF2, NFKBIA, PTPN6, ITGAM, TAB2, HLA-DPA1, JAK2, CYBA, HLA-DPB1, HLA-DOA, HLA-DOB, NCF4, ITGB1, ITGB2, TGFB2, MAP3K7, IL4, JAK1	Up-regulated
99	KAYO_CALORIE_RESTRICTION_MUSCLE_up	0.000173822	0.00208018	0.586163	2.40465	0	92	XGY2, FAP, LUM, COL3A1, FLNA, COL1A2, FN1, COL6A3, RASSF2, IGFBP4, GAS1, COL1A1, CNN3, C1QB, LAMA2, HSPG2, PLAU, EMP3, MYH9, CPA3, HSPA6, LRP1, MYH10, CYB5R3, FGL1, SAFB, KL, HCLS1, TANK, GDI1, NR4A3, DRD2, KRT12, APP, DEFA6, VAT1, UPP1	Up-regulated
100	KEGG_ECM_RECEPTOR_INTERACTION_up	0.000174429	0.00208018	0.596118	2.40263	0	83	THBS2, SPP1, THBS1, COL3A1, ITGA5, COL5A1, ITGAV, COL6A2, COL6A1, COL11A1, COL1A2, FN1, COL6A3, SDC2, COL1A1, ITGA11, LAMA2, HSPG2, COL5A2, GP9, GP1BA, COL4A1, LAMA1, AGRN, SV2B, ITGA8, TNC, ITGB5, SV2C	Up-regulated
101	ONDER_CDH1_SIGNALING_VIA_CTNNB1_up	0.000174429	0.00208018	0.595631	2.40067	0	83	BGN, GREM1, FBLN5, MFAP2, ACTA2, MYL9, PRRX1, POSTN, ANOS1, DOCK10, VCAN, COL1A2, TAGLN, COL6A3, FERMT2, FBN1, C3, CDH11, SPOCK1, TPM1, TNFAIP3, KCNMA1, CD83, IGFBP3, NREP, SERPINE1	Up-regulated
102	ZIRN_TRETINOIN_RESPONSE_WT1_up	0.000187723	0.00208018	0.790361	2.40058	0	22	AKAP12, PDGFRA, DLC1, LRRC32, ETV1, IGFBP3, RARRES1, CLDN11, ZNF133, IGFBP6, NAV2, RARB, KANSL3, TAL1	Up-regulated
104	ALTEMEIER_RESPONSE_TO_LPS_WITH_MECHANICAL_VENTILATION_up	0.000169981	0.00208018	0.556807	2.3927	0	121	AKAP12, MAP3K8, FCGR2A, THBS1, CCL3, VCAN, IL6, TIMP1, OSMR, ST3GAL1, FCER1G, GPR65, FCGR1A, TNFAIP3, MEFV, SOD2, MS4A6A, LST1, F13A1, BCL2A1, GEM, RCAN1, JUNB, SERPINE1, FPR2, ADM, ADAMTS4, MXD1, NFKBIA, LITAF, CH25H, ITGAM, IRGM, CYBB, CCL4L2, CD14, CXCL2, BST1, OAS2, SAP30, NFKBIZ, UPP1, GCH1, GPR84, IL1RN, CXCL10, IL36G, SOCS3, TFEC, GK, CEBPD, CASP4, BCL3, CCL2	Up-regulated
105	JAATINEN_HEMATOPOIETIC_STEM_CELL_dn	0.000159286	0.00208018	0.509528	2.37859	0	224	MNDA, S100A8, CYP1B1, FCGR2A, NEXN, CALD1, THBS1, SLC2A3, RGCC, CCL3, VCAN, FCGR3B, FPR1, CD163, ARL4C, GABARAPL1, LBH, GZMK, FCER1G, S100A9, CHI3L1, GPR65, CTSB, NID1, C5AR1, TNFAIP3, PTGDR, PLXDC1, IL7R, SULF2, MS4A6A, SGK1, F13A1, BCL11B, CCL5, CSTA, CLEC7A, DOK2, GIMAP4, CHRM3-AS2, IL10RA, LEF1, CD28, LTF, STX11, PIK3R5, NCF2, MPEG1, SAMHD1, ZFP36L1, S100A12, TYROBP, CD86, CD8A, RTN1, CITED2,…	Up-regulated
107	KINSEY_TARGETS_OF_EWSR1_FLII_FUSION_dn	0.000154202	0.00208018	0.489745	2.37442	0	317	DSEL, CCDC80, ANGPTL2, SPARC, COL3A1, POSTN, COL5A1, TAGLN, FN1, FBN1, LOX, CLEC2B, SPARCL1, VIM, LRRC17, KLF7, COLEC12, FSTL1, EMCN, COL1A1, NUAK1, A2M, IGFBP5, ADAMTS5, SHISA2, JAKMIP2, DLC1, MEF2C, RHOB, COL5A2, SULF2, GULP1, KIF26B, NBL1, PLAU, PXDC1, FNDC3B, RBMS3, XKR4, CARD6, TSPYL4, MXRA8, GEM, LPAR6, YPEL2, MGP, RIN2, HDAC5, FRMD6, VCL, PARVA, ZNF423, ADM, GNAS, PHLDB1, MXD1, SPHK1, GPNM…	Up-regulated
108	BERENJENO_ROCK_SIGNALING_NOT_VIA_RHOA_dn	0.000182916	0.00208018	0.653919	2.3682	0	48	ACTA2, SPARC, QKI, NRP1, FERMT2, EGR1, WWC2, NR2F2, TPM1, LPP, COL5A2, CSF1, UGCG, PDLIM7, WSB1, MYH9, COL4A1, VCL, SH3GLB1, BOD1L1, MYL12A, EXT1	Up-regulated
109	TOMLINS_PROSTATE_CANCER_dn	0.000184775	0.00208018	0.690321	2.36653	0	37	AKAP12, MYLK, RBPMS, CNN1, DAAM2, GAS1, MEIS2, PCP4, SGCE, PMP22, SVIL, CYLD, SEC23A, PPP1R12B, VCL, ATP2B4, SCRN1, GSN, TPM2, TACC1, MEIS1, MYOF, DST	Up-regulated
110	HOELZEL_NF1_TARGETS_dn	0.000171174	0.00208018	0.556247	2.36447	0	114	BGN, MFAP2, ST6GAL2, COL3A1, FN1, PDGFRA, SERPINF1, ST8SIA1, FSTL1, IGFBP5, DCHS1, NR2F2, ADAMTS5, XIST, PRKD1, GUCY1A2, TMEM204, WNT5A, NREP, UBE2E2, FBXL7, ZNF423, ADM, CAMK1D, MIAT, YPEL3, ARHGAP28, PDPR, ADCY1, FRMD4A, GATA3, ST6GALNAC5, ADAMTS1, TMEM200B, LEPR, SNAP91, LATS2, LONP2, HMCN1, TSPYL5, EDNRB, NTRK3, TNRC18P2, CD200, AMPH	Up-regulated
111	LINDSTEDT_DENDRITIC_CELL_MATURATION_D_up	0.000177054	0.00208018	0.617037	2.3555	0	62	MAF, CCL22, ITGA5, ITGAV, RAB31, CLEC2B, EGR2, IFI16, ITGAX, CIITA, LST1, F13A1, RCBTB2, PLPP3, ACP5, HLA-DMB, ANXA1, CD99, NCF2, PTGER3, CDH2, ITGAM, DAB2, ARHGDIB, TGFBI, CLEC10A, NAGA, TPP1, PTPRE, ITGB2, ATP6V1A, SLC6A2	Up-regulated
113	TAKEDA_TARGETS_OF_NUP98_HOXA9_FUSION_10D_dn	0.000166085	0.00208018	0.532664	2.34738	0	143	MAF, NRP1, FPR3, NRP2, RGCC, CCL3, SERPINF1, MMP1, STAB1, CLEC5A, SLCO2B1, A2M, CHI3L1, IL1R1, CTSB, RASSF4, OLFML2B, C5AR1, C1QB, TREM2, SLAMF8, IL7R, SGK1, KCNJ15, F13A1, RARRES1, SLC16A10, PLPP3, ACP5, FCER1A, PADI4, CCL18, CXCL5, RGL1, GLUL, BPI, RAPH1, PTGER3, PPP2R2B, TLR7, SRPX, SGTB, GPNMB, RTN1, TSPAN2, LGMN, DAB2, MMP9, MMP8, FABP3, FRMD4A, TGFBI, CXCL2, C1QA, CD1B, GAPLINC, KLF2, CD59,…	Up-regulated
114	AZARE_NEOPLASTIC_TRANSFORMATION_BY_STAT3_up	0.000169405	0.00208018	0.543412	2.34404	0	124	GREM1, PCDH7, S100A8, CALD1, THBS1, PALLD, COL5A1, SRGN, FN1, PLTP, CLIC4, ARL4C, DCBLD2, CDH11, PDPN, IGF2, S100A9, NNMT, SPOCK1, IFI16, CALU, COL5A2, KCNMA1, MMP3, SFRP1, MCL1, GNG11, EMP3, ARHGAP25, ELAVL2, FEZ1, LTBP1, MAN1A1, ARHGDIB, TNC	Up-regulated
115	BRUECKNER_TARGETS_OF_MIRLET7A3_dn	0.000177525	0.00208018	0.596668	2.34327	0	73	SPARC, NRP2, CALD1, COL5A1, COL11A1, FN1, VIM, LBH, NNMT, SPOCK1, SULF2, MT2A, EFEMP1, AKR1B1, GPRC5B, RNF149, BCL2A1, GLS, SFRP1, CXCL5, RIN2	Up-regulated
116	LANDIS_BREAST_CANCER_PROGRESSION_dn	0.00017819	0.00208018	0.6004	2.3415	0	70	CCDC80, ANGPTL2, QKI, NRP1, ZEB1, LUM, COL3A1, COL5A1, COL6A3, HTRA1, FSTL1, GJA1, BNIP2, COL1A1, CXCL12, DPT, COL4A1, IGFBP6, MAP4, SRPX, NR1H3, MAN1A1, HSPB8, MFNG, COL18A1, TGFBI, MRC1, AHNAK, ST3GAL6	Up-regulated
117	WANG_MLL_TARGETS_up	0.00015625	0.00208018	0.488844	2.3406	0	284	DKK3, MMP2, CCDC80, THBS2, MAF, CPQ, GLT8D2, SFRP2, COL10A1, ASPN, POSTN, COL6A2, DPYD, VEGFC, COL6A1, SVEP1, IL6, PTHLH, MEG3, PTPRM, ISLR, CHI3L1, MRC2, FAM20A, CLMP, COL14A1, EBF3, RGS16, ADAM19, TREM2, JAM2, SLIT2, TMEM140, OMD, ABCA9, PLA2R1, ETV1, KCNJ15, FABP4, NFATC4, RNF144B, PAX6, APOBEC3F, SFRP1, PELI2, FGF10, RNF144A, AVPR1A, SERPINB10, MAFB, FUT11, CLIP4, MGP, MMP13, FBXL7, CDO1, IGF…	Up-regulated
118	REACTOME_RESPONSE_TO_ELEVATED_PLATELET_CYTOSOLIC_CA2_up	0.000169062	0.00208018	0.539654	2.33942	0	128	PCDH7, TGFB3, TIMP3, SPARC, THBS1, FLNA, VEGFC, SRGN, FN1, TIMP1, PECAM1, IGF2, ISLR, A2M, VEGFB, CALU, RARRES2, ANXA5, TGFB1, F13A1, PDGFA, ITIH3, CD109, ORM1, HABP4, SERPINE1, PRKCG, PDGFB, ALB, VCL, TTN, ORM2, APLP2, PROS1, FERMT3, ECM1, SERPINA1, APP, APOA1, TF, F8, CTSW, SERPINF2, HGF, PLG, CLEC3B, ITIH4, SCG3, TGFB2, TMSB4X, PPBP, GTPBP2, PSAP, SERPINA4	Up-regulated
119	TSENG_IRS1_TARGETS_dn	0.00016818	0.00208018	0.537719	2.33852	0	131	DKK3, NRP1, SFRP2, ADARB1, COL3A1, COL6A1, COL6A3, IGFBP4, SPARCL1, GJA1, FTH1, IL1R1, B3GALNT1, EBF3, SNAI2, CCDC88A, NFYB, SGCE, HTRA3, GGT5, FABP4, PLPP3, TAPBP, HSBP1, TRAF3IP2, PRL, TMEM45A, FRMD6, COL4A1, MYLPF, ZFHX3, FAM50B, RAMP2, ADM, IL6ST, TMEM185A, LITAF, ENPP1, DAB2, LPAR1, ZNF419, LIMCH1, PAX3, SEMA3E, TGFBI	Up-regulated
120	WIERENGA_STAT5A_TARGETS_GROUP2_up	0.000182249	0.00208018	0.633875	2.33812	0	53	FPR3, SPP1, CCL22, CCL3, COL6A1, GABARAPL1, ABCA1, PHTF2, RNF217, GPR65, IL7R, SLC2A14, CD83, CCL5, PLAU, OLR1, EGFL6, BHLHE40, TUBB2B, CD1B, RGS1, KLF2, CXCL10, CLEC4A, GADD45B, TRAF1, CXCL8, HOXB5, CCL2	Up-regulated
121	RUIZ_TNC_TARGETS_up	0.000165453	0.00208018	0.527516	2.33539	0	148	SPP1, COL3A1, SLC2A3, EDNRA, ZNF532, COL1A2, SNCAIP, PDGFRA, CDH11, WIPI1, ST3GAL1, A2M, IL1R1, FLRT2, PNRC1, CHST15, ROBO1, ACSL4, OLFML2B, COL5A2, WSB1, CXCL12, RARRES1, YPEL5, PHF21A, TBXAS1, KLF9, PDE5A, MAFB, LEF1, PDGFRB, PCMTD2, TNFSF10, ATP2B4, WDR26, CBLB, MAN1A1, RCBTB1, GSN, ARHGAP28, COL18A1, PROS1, TDO2, SLC23A2, BNIP3L, SLC2A10, FAM110B, SLC6A15, ZCCHC24, ENPP2, ITSN1, ARID5B, IGFBP…	Up-regulated
123	BURTON_ADIPOGENESIS_8_up	0.000176367	0.00208018	0.587992	2.33172	0	76	FGF7, ACTA2, CPQ, PTGIS, ITGAV, PLTP, RAB31, CMTM3, SERPINF1, LOX, PDPN, PDLIM7, ANXA5, PHLDB2, TAPBP, F2R, EMP3, CD99, MYH9, VCL, OGN, PLD3, SKI, DSTN, ZFP36L2, APP	Up-regulated
124	HARRIS_HYPOXIA_up	0.000174734	0.00208018	0.580323	2.3309	0	81	TGFB3, SPP1, SLC2A3, COL5A1, TAGLN, IL6, VIM, FLT1, IGF2, HIF1A, IGFBP2, HMOX1, BNIP3, TGFB1, EPO, IGFBP3, CD99, PDGFB, MMP13, ADM, PGK1, HK1, L1CAM, TEK, FTL, BHLHE40, BNIP3L, STC1, TF, TGM2, ENPEP, HGF, EPAS1, EDN1, CXCL8, PRPS1, CA12	Up-regulated
125	BASSO_CD40_SIGNALING_up	0.000172325	0.00208018	0.561433	2.32788	0	98	MAP3K8, LGALS1, CCL22, CCL3, SRGN, LAPTM5, PTP4A3, TNFAIP3, MEF2C, LRRC32, CD83, STK10, BCL2A1, PLXNC1, EHD1, JUNB, HLA-DRB1, NFKBIE, NCKAP1L, NCF2, ELL2, ZFP36L1, NFKBIA, LITAF, CD74, IER3, SH2B3, CD58, CFLAR, FCMR, PHACTR1, RGS1, ARID5B, HLA-DPB1, PTPRE, GADD45B, TRAF1, TMSB4X, TRIP10, HLA-DQA1, NEFM, ICAM1, PTK2B, LYN	Up-regulated
126	WP_TYROBP_CAUSAL_NETWORK_up	0.000178476	0.00208018	0.614282	2.3261	0	60	MAF, SPP1, DPYD, CD84, PPP1R18, C3, ADAP2, TMEM106A, SAMSN1, ITGAX, CREB3L2, IL10RA, NCKAP1L, NCF2, GIMAP2, TYROBP, ITGAM, SH2B3, HCLS1, GPX1, ZFP36L2, CYTL1, CD37, RGS1, NPC2, BIN2, ITGB2, FKBP15, LGALS9B, C1QC, IGSF6, LOXL3, GAL3ST4, RUNX3, APBB1IP	Up-regulated
127	ZHANG_ANTIVIRAL_RESPONSE_TO_RIBAVIRIN_dn	0.000184264	0.00208018	0.653771	2.32447	0	44	CYP1B1, CCL3, VEGFC, AXL, RRAS2, DUSP10, GEM, PPP1R3C, SERPINE1, ZFHX3, CAV2, NCF2, CXCR3, GATA3, FGF2, PPP3CC, CFLAR	Up-regulated
128	HERNANDEZ_MITOTIC_ARREST_BY_DOCETAXEL_1_up	0.00018577	0.00208018	0.696075	2.32426	0	33	TIMP3, SPP1, RGCC, VEGFC, GYG2, WNT5A, SGK1, DUSP1, LIX1L, TNFRSF11B, EMP3, ELAVL2, FABP3, CCL21, PRAME, EDNRB, NEK2, ADGRF2	Up-regulated
129	DANG_REGULATED_BY_MYC_dn	0.000159134	0.00208018	0.494853	2.32275	0	238	INHBA, AKAP12, FBLN5, SPARC, CRYAB, CALD1, THBS1, COL3A1, POSTN, COL5A1, SLC11A1, CAV1, COL1A2, FN1, COL6A3, LXN, PDGFRA, LOX, HIVEP2, KLF7, FSTL1, GAS1, COL1A1, FTH1, A2M, ANXA6, MAN2B1, CTSB, TPM1, PEA15, THY1, HMOX1, PLS3, PAM, PDLIM7, PMP22, TGFB1, DUSP1, ERRFI1, NREP, FADS2, F2R, ACP5, ARHGAP25, SERPINE1, PDGFRB, PDGFB, MGP, ALB, NMT1, IL1RAP, ACSL1, ADM, ZFP36L1, MCC, HSPB1, PHLDB1, MYO1B, …	Up-regulated
130	FLECHNER_BIOPSY_KIDNEY_TRANSPLANT_REJECTED_VS_OK_up	0.000174095	0.00208018	0.574189	2.32033	0	84	S100A8, AIF1, VSIG4, COL6A3, RAB31, LAPTM5, RASSF2, CD163, CD53, CCND3, FCER1G, FCGR3A, FCGR1A, C1QB, GLIPR1, APOC1, LST1, IL4R, CCL5, CSTA, MOXD1, IL10RA, LTF, GLUL, PTPRC, TYROBP, CD8A, MMP9, HCLS1, CD14, RGS10, CXCR4, IFFO1, RHOH, ARPC1B, GMFG, ITGB2	Up-regulated
131	RUTELLA_RESPONSE_TO_HGF_VS_CSF2RB_AND_IL4_up	0.000151538	0.00208018	0.468246	2.31999	0	394	MMP2, TNFAIP6, SPARC, CTSK, NRP1, RDX, CYP1B1, SPP1, SLC2A3, RGCC, AIF1, CCL3, ANOS1, LAIR1, VSIG4, AKT3, C1S, PLTP, FPR1, LXN, CD163, C3, DHCR24, BCAT1, EGR1, SDC2, CLEC5A, PECAM1, FTH1, ST3GAL1, S100A9, CHI3L1, CTSB, SNX10, CHST15, ATP6V1C1, FCGR1A, TM6SF1, SLC12A8, IFITM2, C5AR1, TREM1, SLAMF8, MEF2C, IRAK3, SOD2, SLC29A3, KCNMA1, ANXA5, MT2A, BHLHE41, AKR1B1, APOC1, SIK3, SGK1, UFSP2, RARRES1…	Up-regulated
132	URS_ADIPOCYTE_DIFFERENTIATION_dn	0.000186986	0.00208018	0.704687	2.31835	0	31	THBS2, DCN, SPARC, LUM, COL3A1, COL6A1, FN1, COL6A3, LOXL1, LOX, MMP9, ADORA1, CD37, PPARD, AGTRAP, LRP3	Up-regulated
133	SENESE_HDAC1_AND_HDAC2_TARGETS_dn	0.00016	0.00208018	0.498166	2.31525	0	216	MYLK, CCDC80, MAF, TIMP3, GLT8D2, BNC2, MYL9, CRYAB, LUM, NEXN, SPP1, CALD1, COL3A1, PRR16, CAV1, TAGLN, ITGBL1, TCF4, LOXL1, FGFR1, LOX, LBH, WIPI1, SDC2, FSTL1, GPX8, COL1A1, NACC2, IGFBP5, MFAP5, DACT1, GLI2, TMEM255A, TPM1, C5orf46, GXYLT2, DUS2, WNT5A, ACKR3, PLS3, COL5A2, DUSP1, RBMS3, TNS3, FADS2, TMEM45A, PRRT3, CDC42EP3, SBSPON, EPB41L3, RIN3, KATNAL1, PPP2R2B, GPNMB, IFT74, ALOX5, ACOT2…	Up-regulated
134	MCBRYAN_PUBERTAL_TGFB1_TARGETS_up	0.000165508	0.00208018	0.515838	2.31022	0	164	DKK3, MMP2, TNFAIP6, ACTA2, QKI, BASP1, CALD1, ITGAV, VCAN, TAGLN, FN1, CNN1, PRKACB, EGR2, CDH11, HTRA1, GJA1, CNN3, RUNX1, KDR, PDGFC, GFRA1, MEF2C, CYTH1, HSPG2, WNT5A, OGFR, F2R, EHD1, COL8A1, LTF, SPIN1, HK1, CYB5R3, SIAH2, PTPN14, IER3, GSN, STAT5B, TNC, APLP2, NFIC, CD14, FABP3, BHLHE40, ECM1, TLE3, TGM2, TPM2, RAB5C, PLOD2, MMP14, EXTL3, GRB10, TSC22D1, EPAS1, PCOLCE, NFIB, NRIP1	Up-regulated
135	PETROVA_PROX1_TARGETS_dn	0.000180473	0.00208018	0.619944	2.30631	0	55	NRP1, FAP, ITGA5, VCAN, SRGN, RGS4, PRKACB, IL6, NUAK1, ANXA6, NNMT, SMURF2, AXL, PLAU, EMP3, SERPINE1, SRPX, CDH2, IL32, MLLT11, ARHGDIB, TANK, BMP6, ICAM2, CD59, MMP14, LTBP2, LPXN, TFEC, TRAM2, FAM107A, CCL2, CAP2, ZBTB18, PRNP, ARHGAP22	Up-regulated
137	GRUETZMANN_PANCREATIC_CANCER_up	0.000153681	0.00208018	0.471222	2.30303	0	345	AKAP12, MYLK, TUSC3, MMP2, TNFAIP6, THBS2, TIMP3, SPARC, CTSK, MYL9, FAP, LUM, CALD1, ACVR1, POSTN, DPYD, VCAN, CAV1, SRGN, FN1, RAB31, FBN1, CNN1, LAPTM5, PRKACB, CD53, COL1A1, IGFBP5, NNMT, ARHGAP1, NID1, FCGR3A, HLA-DRA, RGS16, IFITM2, BST2, TNFAIP3, PLN, CYTH1, WNT5A, COL5A2, UGCG, FBLN2, ANXA5, GUSBP11, PMP22, APOC1, SHC1, NBL1, IL4R, PTGS1, GGT5, PLAU, NREP, GEM, SUSD6, EMP3, SERPINE1, ANXA…	Up-regulated
138	LINDGREN_BLADDER_CANCER_CLUSTER_2A_dn	0.000168606	0.00208018	0.528667	2.29542	0	130	PALLD, CLIC4, ARL4C, GABARAPL1, DCBLD2, MYO5A, CNN3, PER3, DPYSL2, RNF41, PBX3, ACSL4, RHOB, CFL2, AP1S2, GLIPR1, UGCG, ANXA5, MT2A, PMP22, TGFB1, SGK1, EVI2A, TSC22D3, CYBRD1, UBE2E2, RCAN1, HABP4, MAFB, ZMAT1, MT1H, GRAMD1A, CYBB, DAB2, SLFN11, GSN, RCAN2, SDCBP, ZFAND5, SGCB, AFAP1L1, CCDC50, PLAGL1, ISCU, JADE1, SOCS3, MBNL1, MS4A4A, ALCAM, RNF38, TRPS1, PSMD5, RASSF8, SETX, DNAJC10, LMO2, C3…	Up-regulated
139	HAN_JNK_SINGALING_up	0.000185529	0.00208018	0.680516	2.2911	0	34	ANGPTL2, ZEB1, LOX, RUNX1, DPT, SGK1, DUSP1, CCL5, PRL, PLEKHO1, IL1RL1, IRGM, TNC, TGFBI	Up-regulated
140	MCDOWELL_ACUTE_LUNG_INJURY_up	0.000184366	0.00208018	0.637681	2.28896	0	46	AKAP12, S100A8, FCGR2A, SPP1, COL3A1, LOX, OSMR, TPM1, DUSP1, MCL1, LTF, SPHK1, NFKBIA, LITAF, LTBP1, TNC, STEAP4, TGFBI	Up-regulated
141	VERRECCHIA_EARLY_RESPONSE_TO_TGFB1_up	0.000182249	0.00208018	0.619764	2.28608	0	53	TIMP3, SPARC, COL3A1, VCAN, COL6A1, COL1A2, FN1, COL6A3, LRRC17, TIMP1, IGFBP5, NID1, IGFBP2, HSPG2, RHOB, MMP3, IGFBP3, SERPINE1, LRP1, RHOQ, ITGB5, CD59, MMP14, RHOG, ITGB2, IGF2R, MMP19, TCF7L2, RHOA, RHOC, ICAM1, APC	Up-regulated
142	CAIRO_HEPATOBLASTOMA_CLASSES_dn	0.000160617	0.00208018	0.494403	2.28343	0	204	DKK3, MYLK, DCN, ZEB1, COPZ2, LIMS2, C1S, SVEP1, GABARAPL1, HIVEP2, EGR1, HTRA1, C1R, VSTM4, EMCN, SNRK, IL1R1, RRAS, PEA15, NTF3, RARRES2, LAMA2, CSRP2, TRANK1, NBL1, TSC22D3, C1QTNF3, ATP10A, ATN1, FAT4, LMOD1, RCAN1, SMAD7, DAO, PAMR1, CD81, GFOD1, GLUL, CDC42EP3, KANK2, CYLD, ABHD6, CAMK1D, IL6ST, BSCL2, NFKBIA, HGD, RARB, ITGA8, APCS, MAP3K5, FABP3, BHLHE40, MAST4, COL18A1, PRKCH, ECM1, AQP9…	Up-regulated
145	ELVIDGE_HIF1A_AND_HIF2A_TARGETS_dn	0.000171939	0.00208018	0.545217	2.27081	0	100	AKAP12, VEGFC, CAV1, LOXL1, LOX, EGR1, GJA1, IGFBP5, SPOCK1, DPYSL2, BNIP3, PAM, AHNAK2, WSB1, CSRP2, ATXN1, IGFBP3, ZNF654, HLA-DRB1, SERPINE1, PDGFB, TMEM45A, FYN, ADM, SRPX, PGK1, PLIN2, CITED2, LIMCH1, BHLHE40, YEATS2, BNIP3L, STC1, SCNN1B, CXCR4	Up-regulated
146	DORN_ADENOVIRUS_INFECTION_24HR_dn	0.000186185	0.00208018	0.655398	2.26909	0	39	MFAP2, IL6, SNAI2, CYTH1, FHL2, CD83, SGK1, MCL1, NFE2L2, JUNB, BCAR3, ELL2, NFKBIA, IER3, TNFRSF12A, SDCBP	Up-regulated
148	REACTOME_DISEASES_ASSOCIATED_WITH_GLYCOSAMINOGLYCAN_METABOLISM_up	0.000185357	0.00208018	0.646037	2.26155	0	41	BGN, DCN, LUM, VCAN, CHST3, SDC2, HSPG2, OMD, ST3GAL3, OGN, AGRN, GPC6, CHSY1, SLC26A2, EXT1, CHST14, GPC2, B3GALT6	Up-regulated
149	VERHAAK_AML_WITH_NPM1_MUTATED_up	0.000165098	0.00208018	0.501581	2.26055	0	170	MMP2, NCF1, CYP1B1, FCGR2A, BASP1, THBS1, CCL3, VCAN, FCGR3B, SNCAIP, FPR1, CD163, IL6, RUNX1, SNX10, CHST15, FCGR3A, PBX3, C5AR1, TNFAIP3, TREM1, C1QB, HMOX1, VNN2, SOD2, PIEZO2, DEFB1, BCL2A1, MCTP1, TBXAS1, MAFB, CD300C, EPB41L3, ACSL1, CD86, TNFSF10, NFKBIA, CTSD, LTBP1, IER3, CTSL, CD14, FBP1, CXCL2, C1QA, SLC16A3, AQP9, SERPINA1, PILRA, LILRB2, SPINK2, NINJ1, GCH1, PRDM2, MEIS1, KCNJ2, TMEM…	Up-regulated
150	LU_TUMOR_ENDOTHELIAL_MARKERS_up	0.000187723	0.00208018	0.744129	2.26016	0	22	TNFAIP6, ADAM12, POSTN, VCAN, MXRA5, ADAP2, PLXDC1, PAMR1, HSPA6, EGFL6, FZD10, MMP9, STC1	Up-regulated
151	HORIUCHI_WTAP_TARGETS_up	0.000155448	0.00208018	0.471018	2.25987	0	288	DKK3, ACTA2, CPQ, COL27A1, MYL9, SLC2A3, COL5A1, TAGLN, FBN1, FLT1, HIVEP2, CDH11, ABCA1, COLEC12, GLIS3, EMCN, OSMR, PTPRM, CFI, IL1R1, KALRN, PER3, NR3C1, TNFAIP3, RGS2, PCDH17, LPP, HMOX1, VPS41, IL7R, LRRC32, TMEM200A, COX7A1, CSF1, AP1S2, SOD2, SNX29, PMP22, RFTN1, SLC25A51, PTGS1, PRCP, FNDC3B, PLPP3, TAPBP, C2CD2, ACP5, PPP1R3C, CD109, PDZD2, MAFB, TMEM45A, CXCL5, COL4A1, PITPNM3, KLHL6, Z…	Up-regulated
152	TAKEDA_TARGETS_OF_NUP98_HOXA9_FUSION_8D_dn	0.000161603	0.00208018	0.491893	2.25869	0	194	ANTXR1, MAF, NRP1, FPR3, FCGR2B, SLC11A1, PLXDC2, FPR1, CD163, MMP1, ST8SIA1, CLEC5A, SLCO2B1, HTRA1, COLEC12, S100A9, CHI3L1, CTSB, GPR34, TM6SF1, ADAM19, C5AR1, GXYLT2, C1QB, SLAMF8, IL7R, GLIPR2, KCNMA1, SGK1, CLEC7A, CR1, PADI4, CXCL5, GLUL, NCF2, BPI, RAPH1, CAMK1D, S100A12, SRPX, GPNMB, TSPAN2, LGMN, ITGAM, ALOX5, CYBB, DAB2, MMP9, CD14, TGFBI, CD1A, TDO2, C1QA, SERPINA1, MRC1, CYTL1, ST6GA…	Up-regulated
153	KIM_WT1_TARGETS_up	0.000159719	0.00208018	0.486029	2.25642	0	214	INHBA, AKAP12, PCDH7, TIMP3, ZEB1, CALD1, THBS1, RGS4, FERMT2, PDGFRA, CHST3, PTHLH, LBH, EGR1, WWTR1, IGF2, ST3GAL1, GFPT2, NR3C1, TNFAIP3, SNAI2, RAI14, CSF1, GLIPR1, PDE10A, FHL2, CD83, SGK1, FGF5, IL4R, PDGFA, PDLIM5, TNS3, RRAS2, GLS, KLF9, GEM, JUNB, SERPINE1, NFKBIE, LEF1, CDC42SE1, RCOR1, VCL, IQCG, HPGDS, IL1RAP, ZFP36L1, SYDE1, MYH10, KLF10, SPHK1, CDH2, NFKBIA, LITAF, PLEKHG3, MTMR1, L…	Up-regulated
154	BERENJENO_TRANSFORMED_BY_RHOA_dn	0.0001523	0.00208018	0.457151	2.25633	0	380	AKAP12, DKK3, CCDC80, THBS2, DCN, TIMP3, CPQ, CYP1B1, SFRP2, COPZ2, LUM, POSTN, COL5A1, COL6A2, CAV1, COL1A2, FN1, PLTP, COL6A3, TCF4, LXN, AEBP1, PDGFRA, SSPN, FGFR1, LOX, SPARCL1, C1R, GAS1, MEG3, OSMR, MAB21L2, COL1A1, NACC2, PTPRM, CNN3, CDK14, ISLR, JUND, ANXA6, NNMT, GNAI2, MRC2, VEGFB, IL17RA, RRAS, FKBP7, PKD2, EBF3, IFT81, TLR6, SNAI2, LAMA2, VPS41, GAMT, CSRP2, CXCL12, PMP22, SHC1, TOM1…	Up-regulated
155	DAVICIONI_TARGETS_OF_PAX_FOXO1_FUSIONS_up	0.000158479	0.00208018	0.479095	2.25569	0	245	INHBA, SULF1, AKAP12, PCDH7, NRP2, PRRX1, THBS1, COL5A1, COL6A2, VEGFC, CAV1, ARL4C, LRRC17, TIMP1, MAP4K4, SDC2, VSTM4, GAS1, MEG3, CHST11, NNMT, TBC1D9, NR2F2, NID1, ADAMTS5, COL14A1, PDGFC, ADAM19, NR3C1, TNFAIP3, PEA15, PCDH17, JAKMIP2, SNAI2, RHOB, ACKR3, DKK2, TMEM47, SGK1, DUSP1, IL4R, PTGS1, WBP1L, YPEL5, CYBRD1, PLAU, APOBEC3B, PLXNC1, TNS3, MYH9, CREM, HDAC5, TPM4, ELK3, MGAT5, PXDN, CD…	Up-regulated
156	GAUSSMANN_MLL_AF4_FUSION_TARGETS_F_up	0.000163452	0.00208018	0.496517	2.25496	0	178	DKK3, MFAP2, TGFB3, MAP3K8, COL3A1, COL6A2, COL6A1, PLXDC2, RGS4, CNN1, LOX, ADAMTSL4, DRAM1, GAS1, MEG3, OSMR, NUAK1, PTP4A3, MFAP5, TMEM154, PNRC1, FGF5, IL4R, DYSF, PSTPIP2, RCBTB2, TNFRSF11B, CLIP4, PDGFB, TLR1, ZFP36L1, OR51B2, OGN, ADAMTS4, FEZ1, MME, KLHL30, DAB2, EMILIN2, PIK3IP1, CACNA1G, TEK, ARHGAP28, ZFAND5, NR4A3, TP53INP1, ECM1, TTLL7, SLC1A3, ADAMTS2, CASP12, NFKBIZ	Up-regulated
158	REACTOME_MET_ACTIVATES_PTK2_SIGNALING_up	0.000186776	0.00208018	0.690158	2.25382	0	30	COL27A1, COL3A1, COL24A1, COL5A1, COL11A1, COL1A2, FN1, COL1A1, LAMA2, COL5A2, LAMA1	Up-regulated
159	REACTOME_CHONDROITIN_SULFATE_DERMATAN_SULFATE_METABOLISM_up	0.000182249	0.00208018	0.617707	2.25357	0	50	BGN, DSEL, DCN, VCAN, CHST3, SDC2, CHST11, CHST15, DSE, HSPG2, CSGALNACT2, AGRN, GPC6, CHSY3, CHSY1, CHST13, CHST14, GPC2, XYLT1, B3GALT6	Up-regulated
160	SEMENZA_HIF1_TARGETS_up	0.000184706	0.00208018	0.660893	2.25357	0	36	TGFB3, SLC2A3, FLT1, IGF2, IGFBP2, HMOX1, BNIP3, EPO, IGFBP3, SERPINE1, ADM, PGK1, HK1, CITED2, ADRA1B, TF	Up-regulated
161	CHARAFE_BREAST_CANCER_BASAL_VS_MESENCHYMAL_dn	0.000182249	0.00208018	0.617412	2.25249	0	50	ZEB1, COL6A2, CMTM3, BCAT1, NUAK1, GFPT2, GULP1, GNG11, CD99, RBM24, SH2B3, TTC28, SEMA3A, ARHGAP17, KIF3C, ZCCHC24, KLF2, ADAMTS12, GRB10, SCG2, FZD2, RGS7, ALPK2, PNMA2, TNIP1, ARNT2	Up-regulated
162	HARRIS_BRAIN_CANCER_PROGENITORS_up	0.000185667	0.00208018	0.6405	2.25201	0	42	BGN, COL6A2, COL6A1, CAV1, PLPPR4, GJA1, SHISA2, WNT5A, CREBRF, MGP, SRPX2, NINJ2, ARHGAP29, ARHGAP6, CYTL1, SCG5, FOXA3, SCG3, LARP6, MLIP, CASP4, FOXC2	Up-regulated
163	DORN_ADENOVIRUS_INFECTION_48HR_dn	0.000185254	0.00208018	0.652282	2.25009	0	38	MFAP2, IL6, SNAI2, CYTH1, FHL2, CD83, SGK1, MCL1, NFE2L2, JUNB, BCAR3, ELL2, NFKBIA, IER3, TNFRSF12A, SDCBP	Up-regulated
164	BERENJENO_TRANSFORMED_BY_RHOA_REVERSIBLY_dn	0.000186254	0.00208018	0.697321	2.24704	0	28	INHBA, THBS1, TAGLN, IGF2, PBX3, THY1, PHLDB2, ERRFI1, SERPINE1, ADM, IRGM, TNC, PTGER4, SORBS1, LY75-CD302, LATS2, TMSB4X, ALCAM, FHL1, ACTA1	Up-regulated
165	REACTOME_SIGNALING_BY_PDGF_up	0.000357782	0.00259048	0.596511	2.2456	1	58	THBS2, SPP1, THBS1, COL3A1, COL5A1, COL6A2, COL6A1, COL6A3, PDGFRA, PDGFC, COL5A2, COL4A3, PDGFA, CRKL, PDGFRB, PDGFB, COL4A1, HRAS	Up-regulated
166	PANGAS_TUMOR_SUPPRESSION_BY_SMAD1_AND_SMAD5_up	0.00016952	0.00208018	0.51993	2.24539	0	125	FBLN5, MNDA, MMP2, COL12A1, CRYAB, PLTP, TCF4, LAPTM5, LBH, NAV1, FSTL1, NUAK1, CDK14, NID1, GXYLT2, PLXDC1, TMEM204, RFTN1, RBMS3, CLEC7A, EMP3, SIPA1L1, CAV2, KLHL6, ZNF423, ZFP36L1, SPIN1, SMTNL2, LITAF, EFS, GSN, FGD1, TGFBI, C1QA, APOA1, TGM2, NFATC1, TAOK3	Up-regulated
167	ROZANOV_MMP14_TARGETS_up	0.000157629	0.00208018	0.474524	2.24388	0	253	MYLK, ANGPTL2, TIMP3, CALD1, COL5A1, COL6A2, EFEMP2, COL6A1, TAGLN, FN1, RGS4, DAAM2, LRRC17, RBPMS2, GJB2, COLEC12, HIF1A, ANXA6, NNMT, IL1R1, SNX10, CHST15, IGFBP2, TPM1, FKBP7, B3GALNT1, IFITM2, NR3C1, GLIPR1, SULF2, EFEMP1, CD83, HTRA3, ERRFI1, PTGS1, APMAP, PAEP, TNFRSF11B, HLA-DMB, TMEM45A, RIN2, FRMD6, COL4A1, PXDN, NCF2, PLXND1, FEZ1, IL32, ENPP1, LGMN, FKBP1A, NR1H3, P3H1, SRPX2, EMILIN2…	Up-regulated
168	WP_ENDOCHONDRAL_OSSIFICATION_up	0.00017696	0.00208018	0.584406	2.2434	0	64	TIMP3, SPP1, COL10A1, GLI3, FGFR1, PTHLH, IGF2, CHST11, ADAMTS5, MEF2C, TGFB1, PLAU, CDKN1C, MGP, MMP13, ADAMTS4, ENPP1, STAT5B, MMP9, BMP6, FGF2, PRKACA, CST5, ADAMTS1, DDR2, TGFB2, FGFR3, IGF1, COL2A1	Up-regulated
170	KUNINGER_IGF1_VS_PDGFB_TARGETS_dn	0.000184094	0.00208018	0.62759	2.24167	0	45	GREM1, THBS2, RBPMS, FBXO32, CD53, LBH, TIMP1, IL1R1, PLXDC1, ERRFI1, PTGS1, F2R, PRL, MGP, GFOD1, CAV2, MMD, ARHGAP6, RCAN2, PRKG2	Up-regulated
171	TAKEDA_TARGETS_OF_NUP98_HOXA9_FUSION_3D_dn	0.000186776	0.00208018	0.685789	2.23956	0	30	S100A8, FCGR2A, FCGR2B, CD163, S100A9, IL7R, MAFB, CXCL5, ALB, GLUL, ALOX5, TGFBI, APOL4, CLEC10A, CYP7B1, HGF, ATP10D, PPBP	Up-regulated
172	BROWNE_HCMV_INFECTION_12HR_dn	0.00017298	0.00208018	0.542144	2.23685	0	95	FGF7, THBS2, RBMS1P1, AKT3, PDGFRA, GLI3, LRRC17, SDC2, GZMK, IGF2, RUNX1, RUNX1T1, FLRT2, DLC1, UGCG, CXCL12, FHL2, PMP22, KIAA1549L, ATXN1, FGF5, NREP, TBX5, SERPINE1, SLF2, RIN2, SIPA1L1, FYN, TTLL1, SSH1, DAB2, MAP3K5, MAST4	Up-regulated
173	REACTOME_INTERLEUKIN_4_AND_INTERLEUKIN_13_SIGNALING_up	0.000171145	0.00208018	0.528595	2.2367	0	110	MMP2, ZEB1, CCL22, COL1A2, FN1, IL6, VIM, MMP1, TIMP1, HIF1A, HMOX1, ITGAX, TGFB1, IL6R, MMP3, IL4R, F13A1, MCL1, JUNB, ANXA1, SOCS5, CCL11, IL12B, ITGAM, ALOX5, MMP9, GATA3, S1PR1, FGF2, JAK2, NDN, IGHG4, FOXO1, IL13RA2, ITGB1, HGF, ITGB2, SOCS3, IL4, CXCL8, JAK1, CEBPD, ICAM1, CCL2	Up-regulated
174	KAN_RESPONSE_TO_ARSENIC_TRIOXIDE_up	0.000169981	0.00208018	0.520439	2.23643	0	121	CRYAB, THBS1, SLC2A3, VCAN, RGS4, PDGFRA, ARL4C, CLEC2B, PTHLH, GABARAPL1, DCBLD2, WIPI1, GFPT2, IGFBP5, GPR65, HMOX1, IL7R, MT2A, TSC22D3, FABP4, PHGDH, SERPINE1, PTN, MGP, PTPRZ1, NES, MT1H, CAV2, HSPA6, ADM, PPP1R15A, GPNMB, ARHGAP29, ARHGAP6, FABP7, ANKRD1, MT1G, BNIP3L, STC1, VAT1, TRIB3, LDLR, KLF12	Up-regulated
175	WALLACE_PROSTATE_CANCER_RACE_up	0.000156104	0.00208018	0.467164	2.23638	0	283	CD93, EDNRA, FCGR2B, DOCK10, VSIG4, ALOX5AP, SRGN, PLTP, FBN1, CNN1, CYTIP, LAPTM5, ARL4C, CD53, PECAM1, GZMK, HS3ST3A1, FCER1G, GPR65, IFI16, NID1, HLA-DRA, LY96, SAMSN1, RGS16, IFITM2, C5AR1, C1QB, DLC1, IL7R, GLIPR1, AHNAK2, ELOVL2, GPRC5B, CD83, EVI2A, BCL11B, CCL5, BCL2A1, GNG11, STK17B, HLA-DRB1, ARHGAP25, IL10RA, MX2, CD28, CREM, NCKAP1L, PTPRC, FYN, PI15, CD69, IFITM3, STOM, CD86, CD8A, C…	Up-regulated
176	LI_WILMS_TUMOR_VS_FETAL_KIDNEY_2_dn	0.00018406	0.00208018	0.619002	2.23101	0	47	INHBA, TIMP3, SPP1, THBS1, COL5A1, ITGAV, CDH11, IGFBP5, PMP22, GNG11, COL4A1, IGFBP6, AGRN, KLF10, DLK1, DAB2, GATA3	Up-regulated
177	CHEN_LVAD_SUPPORT_OF_FAILING_HEART_up	0.000172325	0.00208018	0.537776	2.22979	0	98	TIMP3, CALD1, RGCC, POSTN, CNN1, CD163, CHST3, NID1, SNAI2, TMEM204, FKBP5, MT2A, TSC22D3, FNDC3B, RRAS2, MCL1, KLF9, SERPINE1, GLUL, NES, VCL, MT1H, DIXDC1, MFAP4, NFKBIA, PLIN2, ANKRD1, ZFAND5, KLF2, FSTL3, RERE, GADD45B, CYP4B1, ZBTB20, TIMP4, DNAJB5, CEBPD, TXNIP, PER1, PDK4, FHL1, ACTA1, IER5, CLU	Up-regulated
178	DAVIES_MULTIPLE_MYELOMA_VS_MGUS_dn	0.000189394	0.00208018	0.712121	2.22727	0	25	S100A8, FCER1G, CDK14, ARHGAP1, LY96, VNN2, MYH9, TLR1, GLUL, MERTK, VCL, LITAF, NPC2, TMSB4X, PPBP	Up-regulated
179	SENESE_HDAC2_TARGETS_dn	0.000169981	0.00208018	0.518218	2.22688	0	121	TIMP3, BNC2, MYL9, CRYAB, LUM, NEXN, SPP1, COL3A1, EFEMP2, COL11A1, TAGLN, LOXL1, LOX, LBH, CDH11, SDC2, COL1A1, MFAP5, FLG-AS1, DACT1, TMEM255A, TPM1, GXYLT2, WNT5A, ACKR3, COL5A2, TNS3, FADS2, IGFBP6, PPP2R2B, GPNMB	Up-regulated
180	IZADPANAH_STEM_CELL_ADIPOSE_VS_BONE_dn	0.000172236	0.00208018	0.532067	2.22631	0	104	AKAP12, FZD7, CCDC80, SFRP2, CRYAB, ASPN, POSTN, PTGIS, TCF4, FBXO32, RGS4, FBN1, LOX, LRRC17, CDH11, PALMD, NUAK1, MFAP5, JAM2, ACKR3, COL5A2, GPRC5B, SLC24A3, VCL, MYH10, MFAP4, ATP2B4, DAB2, ARHGAP29, N4BP2L1, GATA3, FAM234B, NDN, NEK1, ASAP3, NPR3, PLOD2, PBX1, PODN, LTBP2, KCNE4, BCL7A, NFIB, NRIP1, FGF21, CA12, SORBS2, IGF1, TXNIP	Up-regulated
181	MARKEY_RB1_CHRONIC_LOF_dn	0.000169463	0.00208018	0.519641	2.22551	0	118	DCN, TIMP3, CCL3, SRGN, CD53, IL6, GABARAPL1, MSR1, TRPV2, STAB1, HTRA1, IFI16, SPI1, IGFBP2, C1QB, HMOX1, RHOB, MS4A6A, RNF149, IGFBP3, CSF1R, ZDHHC14, SLCO3A1, GNG11, PRL, CD300C, MMP13, PTPRC, TYROBP, ENAH, PLD3, ACKR4, PLIN2, UCHL1, MLLT11, CTSS, FABP7, CD14, IVL, C1QA, FERMT3, FBXO9, GABRB1, NINJ1, NPR3, CD59	Up-regulated
182	HERNANDEZ_MITOTIC_ARREST_BY_DOCETAXEL_1_dn	0.000185839	0.00208018	0.656991	2.22325	0	35	MAF, CTHRC1, PDGFRA, CLEC2B, CDH11, SDC2, XIST, DPYSL2, PDGFC, RGS2, SNAI2, FHL2, MAN1A1, ADGRL2	Up-regulated
184	GOTZMANN_EPITHELIAL_TO_MESENCHYMAL_TRANSITION_up	0.00017819	0.00208018	0.569851	2.21723	0	69	INHBA, TGFB3, ACTA2, TIMP3, CYP1B1, COL3A1, FN1, TIMP1, COL1A1, COL5A2, CSF1, FBLN2, IL4R, PDGFA, SERPINE1, COL4A1, MPDZ, MAP4, CDH2, IRGM, TNC, TEAD2, COL18A1, PROS1, KIFC1	Up-regulated
186	SENESE_HDAC1_TARGETS_dn	0.000158328	0.00208018	0.470367	2.21421	0	244	DKK3, MYLK, COL12A1, MAF, BNC2, MYL9, NOX4, RBPMS, COL3A1, COL5A1, EFEMP2, COL11A1, TCF4, CNN1, FGFR1, PCDHB5, KLF7, FSTL1, COL1A1, IGFBP5, PCDHB10, MRC2, GLI2, CRMP1, RASSF4, FKBP7, PKD2, GXYLT2, JAKMIP2, KCNA1, GLIS2, PIN1, CSRP2, PHLDB2, FAM114A1, NREP, F2R, YPEL2, EFNB3, CDC42EP3, TPM4, IQCA1, MYH10, ENAH, FOLR1, DNAJC1, MIAT, AP1G2, IFT74, TPGS2, SLX4IP, ERGIC1, L1CAM, ALOX5, DAB2, GSN, CMC4…	Up-regulated
187	LU_AGING_BRAIN_up	0.000158203	0.00208018	0.468189	2.21172	0	252	QKI, RDX, CYP1B1, CRYAB, CALD1, PALLD, ITGAV, VCAN, CAV1, FERMT2, CLIC4, RASSF2, SSPN, CLEC2B, VIM, WIPI1, SDC2, WWTR1, PECAM1, HTRA1, GJA1, HIF1A, IFI16, VEGFB, CEP170, LPP, GPR137B, ANXA5, ELOVL2, TMEM47, MT2A, EFEMP1, PMP22, GPRC5B, CREB3L2, PDLIM5, PLXNC1, SFRP1, GNG11, TNFRSF11B, NFE2L2, NT5C2, RIN2, FYN, CAV2, PARVA, ZNF423, STOM, CSRP1, SH3GLB1, NFKBIA, LITAF, EFS, LTBP1, TOPORS, TPD52L2, …	Up-regulated
188	PAPASPYRIDONOS_UNSTABLE_ATEROSCLEROTIC_PLAQUE_up	0.000364166	0.00259048	0.603318	2.21018	1	51	RGCC, SRGN, CD84, CD163, CTSB, FCGR3A, SAMSN1, SOD2, SGK1, RARRES1, ACP5, CCL18, NCKAP1L, GLUL, MPEG1, LGMN, DAB2, CTSS, CXCL2, LAMP1, SIGLEC15, CREG1, TRAM1, NPL	Up-regulated
189	SCHOEN_NFKB_SIGNALING_up	0.000186047	0.00208018	0.665998	2.20947	0	32	SULF1, THBS1, FN1, C3, IGFBP5, PMP22, IGFBP3, NFKBIA, CTSS, MMP9, CXCL2, PTGER4, GADD45B, EDN1, HHEX, CXCL8, JAG1, CCL2, TPST1, SERPINA3, CSRNP1, TNFRSF9	Up-regulated
190	BROWNE_HCMV_INFECTION_20HR_dn	0.00017304	0.00208018	0.535062	2.20538	0	94	FILIP1L, BICC1, COL1A2, AKT3, LRRC15, RGS4, WIPI1, RUNX1T1, ROR2, LPP, VPS41, PMP22, KIAA1549L, AXL, RRAS2, SVIL, F2R, REV3L, TRAF3IP2, FBXL2, ANXA1, FARP1, VCL, SIPA1L1, LTBP1, SRPX2, TPD52L2, MAP3K5, SYT11, FGF2	Up-regulated
191	WINTER_HYPOXIA_METAGENE_up	0.000159388	0.00208018	0.469671	2.20344	0	236	MMP2, THBS2, TGFB3, LGALS1, SPP1, CALD1, THBS1, ITGA5, SLC2A3, COL5A1, VEGFC, FN1, LOX, IL6, VIM, FLT1, EGR1, IGF2, IGFBP5, HIF1A, KDR, VEGFB, IGFBP2, NR3C1, TNFAIP3, HMOX1, BNIP3, COL5A2, ANXA5, BHLHE41, NOS3, TGFB1, EPO, ERRFI1, PTGS1, IGFBP3, PLAU, SLC6A6, SERPINE1, ANXA1, CD99, PDGFB, MMP13, BPI, ELL2, ADM, LRP1, CNOT7, MAP4, PGK1, HK1, PLIN2, CTSD, BATF3, CITED2, SIAH2, MMP7, TEK, FTL, BHLHE…	Up-regulated
192	LANDIS_ERBB2_BREAST_TUMORS_324_dn	0.000166085	0.00208018	0.498508	2.20327	0	147	CCDC80, ANGPTL2, ACTA2, QKI, NRP1, ZEB1, MYL9, LUM, COL3A1, POSTN, COL5A1, COL6A3, GJB2, HTRA1, FSTL1, GJA1, BNIP2, COL1A1, SNRK, CXCL12, DPT, MMP3, ADRB3, CCL11, COL4A1, SEC23A, ACSL1, IGFBP6, ABHD5, MAP4, PHLDB1, RRAGC, SRPX, NR1H3, MAN1A1, APLP2, YWHAG, HSPB8, MFNG, COL18A1, TGFBI, MRC1, AHNAK, ST3GAL6	Up-regulated
195	LIM_MAMMARY_LUMINAL_MATURE_dn	0.00017316	0.00208018	0.534684	2.19902	0	93	CRYAB, CALD1, COL6A2, COL6A1, FBXO32, AEBP1, SPARCL1, VIM, MAP4K4, HTRA1, FSTL1, TSHZ2, DPYSL2, MEIS2, GYPC, SNAI2, TMEM47, IGFBP3, NREP, SFRP1, MOXD1, COL4A1, NES, MERTK, LAMA1, TSPAN2, DAB2, FRMD4A, AQP9, SLC1A3, SLC6A15, FOXO1, ZNF521, SORBS1, HEY2, TIAM2, TFAP2C, NFIB, FZD1, RAP2B, LRIG3, CCL2, ETS1, WTIP	Up-regulated
196	PID_SYNDECAN_4_PATHWAY_up	0.000186047	0.00208018	0.662601	2.19821	0	32	FZD7, ADAM12, THBS1, ITGA5, FN1, FGFR1, CXCL12, CCL5, LAMA1, MMP9, TNC, SDCBP, FGF2, CXCR4, ITGB1, PLG	Up-regulated
197	KANG_AR_TARGETS_dn	0.000187829	0.00208018	0.763331	2.19767	0	18	CTSK, SPP1, COL1A2, COL1A1, VEGFB, ANXA5, TGFB1, MMP8, MEPE	Up-regulated
198	APPEL_IMATINIB_RESPONSE_up	0.00018577	0.00208018	0.65802	2.19718	0	33	CD163, MSR1, CTSB, C5AR1, APOC1, RARRES1, CD68, ACP5, CD300A, CTSD, CTSL, PLD1, LAMP1	Up-regulated
199	DUNNE_TARGETS_OF_AML1_MTG8_FUSION_up	0.000182916	0.00208018	0.606397	2.19609	0	48	S100A8, ALOX5AP, SRGN, CMTM3, LAPTM5, SAMSN1, PRG2, IL6R, LST1, FNBP1, HSPA6, BPI, ATP2B4, LIN7A, ARL15, ATG16L2, ICAM3, NUCB2, CXCR4, GCA, PTGER4, IGFBP7	Up-regulated
201	MORI_IMMATURE_B_LYMPHOCYTE_up	0.000182916	0.00208018	0.606232	2.19549	0	48	GPR65, CD83, MCL1, HLA-DMB, IL10RA, PXK, SEMA4D, PTPRC, SAMHD1, ERO1B, RHOQ, PTPN6, CD74, CTSS, GPCPD1, MYL12A, SMAP2, NEAT1, PIP4K2A, RGS14, TMEM50B, LY6D, PML, HCK, LYN, SLC25A53, LAT2	Up-regulated
202	EBAUER_MYOGENIC_TARGETS_OF_PAX3_FOXO1_FUSION_up	0.000182916	0.00208018	0.606231	2.19549	0	48	MRAS, ACTA2, CRYAB, TAGLN, COL6A3, AEBP1, PALMD, SGCD, TPM1, MEF2C, PDLIM5, MYLPF, MYL6B, MEF2D, MYO10, CXCL10, BIN1	Up-regulated
203	TONKS_TARGETS_OF_RUNX1_RUNX1T1_FUSION_HSC_up	0.000163212	0.00208018	0.482909	2.19426	0	179	MFAP2, FZD7, TUSC3, ACTA2, SPARC, RBPMS, PALLD, COL3A1, SLC2A3, VCAN, CLEC2B, DRAM1, FSTL1, CALCRL, MEG3, RUNX1, PPFIBP1, PNRC1, IFI16, NID1, RRAS, SAMSN1, RGS2, HMOX1, WSB1, EVI2A, DDAH2, FBXW11, PDLIM5, LPAR6, CREM, CDC42EP3, UBL3, HPGDS, CD69, STX6, HSPB1, IL1RL1, MARK4, UCHL1, CH25H, TNFSF4, DAB2, GSN, AMIGO2, S1PR1, BNIP3L, ECM1, CRHBP, KIF3C, ODF2, RGS1, THSD7A, ARID5B	Up-regulated
205	BASSO_HAIRY_CELL_LEUKEMIA_up	0.000176118	0.00208018	0.551175	2.19097	0	77	MAF, THBS1, AIF1, DPYD, FGFR1, TIMP1, WWTR1, PTPRM, IL1R1, MFAP5, RRAS, ARRB2, DLC1, NOVA1, IGFBP3, PLXNC1, RCBTB2, ANXA1, RIN2, HPGDS, FGF2, HBB, LILRB2, VAMP3, TACC1, PLOD2, MYOF, DST, ADCY9, RNF11, TMEM59, SIX3, TIMP4, TCF7L2, PPIC, RAB13, GAS7	Up-regulated
206	YAO_TEMPORAL_RESPONSE_TO_PROGESTERONE_CLUSTER_16_up	0.000176585	0.00208018	0.553987	2.19007	0	75	BGN, MFAP2, PCDH7, SPARC, COL3A1, COL6A2, VCAN, COL1A2, COL6A3, FBN1, CNN1, COL1A1, IGFBP5, ANXA6, PDLIM7, TMEM45A, COL4A1, PTGER3, FEZ1, SRPX, DAB2	Up-regulated
207	GRAHAM_NORMAL_QUIESCENT_VS_NORMAL_DIVIDING_up	0.000358938	0.00259048	0.585184	2.18669	1	56	INHBA, RBPMS, CYTIP, FTH1, PPFIBP1, GLIPR1, SOD2, EVI2A, SVIL, FNBP1, CREM, PTPRC, TNFSF10, TNFSF4, ALOX5, NFAT5, IL18R1, KYNU, CXCL2, CRHBP, NEAT1, CXCL10, DST, CXCL13, NRIP1, TCF7L2	Up-regulated
208	KOKKINAKIS_METHIONINE_DEPRIVATION_96HR_up	0.00017094	0.00208018	0.513229	2.18585	0	115	BGN, MMP2, FGF7, DCN, TIMP3, LUM, DPYD, CAV1, PDGFRA, IGFBP4, FGFR1, PRKACB, IL6, TIMP1, GJA1, IGFBP5, IL1R1, IGFBP2, RHOB, WNT5A, SHC1, IGFBP3, ABL1, SMAD7, PDGFRB, DVL3, IGFBP6, IL6ST, HSPB1, LITAF, TANK, FGF2, CFLAR, SKIL, IGFBP7, POLG, HGF, BAX, GADD45A, IGF2R, TGFB2, FZD1, CXCL8	Up-regulated
209	HOLLERN_SOLID_NODULAR_BREAST_TUMOR_dn	0.000186776	0.00208018	0.669247	2.18554	0	30	SPARC, GLI3, IGFBP4, PDPN, GJA1, NID1, DGKH, RBMS3, LRRC8C, TMEM159, ANKRD44, ADAMTS9, RYR1, ENPP2, AQP1, COL2A1, ICAM1, PTPRS, HAS2, TPST1, BMP2	Up-regulated
210	LU_IL4_SIGNALING_up	0.00017449	0.00208018	0.538093	2.18485	0	87	VEGFC, GNG2, IL6, EGR1, SAMSN1, TNFAIP3, HLA-DRB5, ATXN1, EVI2A, IL4R, CCL5, VCL, NCF2, CD69, CD86, GNAS, PHF20L1, TLR7, CTSD, NCOA3, SIAH2, ALOX5, MAP3K5, BHLHE40, CFLAR, NFKBIZ, IL2RA, KLF13	Up-regulated
211	BROWNE_HCMV_INFECTION_18HR_dn	0.00016488	0.00208018	0.483568	2.1841	0	173	GREM1, MYLK, ANGPTL2, ADAM12, RBPMS, THBS1, COL3A1, PTGIS, COL6A2, VCAN, COL6A1, LOXL1, GLI3, GPR176, SSPN, LRRC17, PDPN, IGF2, SGCD, ARHGAP1, RRAS, GUCY1A2, PNOC, LRRC32, GP9, DUSP1, AXL, RBMS3, GNG11, TNFRSF11B, PDGFRB, RIN2, PAMR1, TPM4, FYN, PLXND1, TTLL1, ABCA8	Up-regulated
212	KANG_IMMORTALIZED_BY_TERT_up	0.000174246	0.00208018	0.538655	2.18336	0	86	BGN, PCDH7, GRIA3, POSTN, COL6A2, C3, CACNA2D1, TRPV2, NNMT, PDGFC, NTF3, BNIP3, WNT5A, TGFB1, RARRES1, SLC6A6, CHRNA3, TNFRSF11B, AP4E1, COL8A1, PDGFB, CDC42EP3, IAPP, TNC, PCDHB8, SCN11A, FGF2	Up-regulated
213	REACTOME_PLATELET_ACTIVATION_SIGNALING_AND_AGGREGATION_up	0.000157134	0.00208018	0.460913	2.18232	0	255	PCDH7, TGFB3, TIMP3, SPARC, THBS1, FLNA, VEGFC, COL1A2, SRGN, FN1, GNG2, TIMP1, PDPN, PECAM1, IGF2, COL1A1, FCER1G, ISLR, A2M, GNAI2, VEGFB, THPO, ARRB2, CALU, RARRES2, RHOB, GP9, ANXA5, SHC1, TGFB1, DGKH, F13A1, PDGFA, ITIH3, GP1BA, GNG11, F2R, CD109, ORM1, HABP4, SERPINE1, PRKCG, PDGFB, ALB, PIK3R5, VCL, ABHD6, FYN, RAP1A, TTN, PTPN6, ORM2, APLP2, GNB4, PROS1, PRKCH, FERMT3, ECM1, SERPINA1, APP…	Up-regulated
214	BLANCO_MELO_RESPIRATORY_SYNCYTIAL_VIRUS_INFECTION_A594_CELLS_up	0.000156055	0.00208018	0.456154	2.18214	0	280	DSEL, NID2, ITGA5, TNFSF13B, CCL3, COL15A1, C1S, FBXO32, C3, IL6, MMP1, EGR1, ABCA1, IRAK2, FSTL1, OSMR, CHST11, ST3GAL1, GFPT2, SPOCK1, TMEM154, IFI16, CLMP, ADAM19, BST2, CRTAC1, TNFAIP3, RGS2, ADGRE2, TMEM140, IL7R, CSF1, GLIPR1, SOD2, NAV3, POU2F2, TRANK1, IL4R, PLAU, BCL2A1, CD68, MCTP1, MX2, STX11, HIVEP3, NCF2, HSPA6, SAMHD1, IL1RAP, CDK5R2, ICAM4, MXD1, TNFSF10, PPP1R15A, CH25H, CTSS, ARN…	Up-regulated
215	PID_ALK1_PATHWAY_up	0.000189394	0.00208018	0.697313	2.18096	0	25	INHBA, TGFB3, ACVR1, CAV1, ACVR2A, ARRB2, TGFB1, SMAD7, FKBP1A, BMPR2	Up-regulated
216	CHIARADONNA_NEOPLASTIC_TRANSFORMATION_CDC25_up	0.000169981	0.00208018	0.506864	2.17809	0	121	MNDA, FGF7, THBS2, CYP1B1, THBS1, VCAN, LOXL1, LXN, C3, IL6, PDPN, IGF2, OSMR, CHI3L1, IL1R1, CTSB, IFI16, NID1, ADAM19, THY1, CSF1, PLA2R1, PHLDB2, ERRFI1, EVL, PLPP3, F2R, PRL, MGP, CDO1, NAV2, ENAH, DLK1, IL1RL1, LPAR1, TNC	Up-regulated
217	GALINDO_IMMUNE_RESPONSE_TO_ENTEROTOXIN_up	0.000176087	0.00208018	0.545139	2.17206	0	78	PCDH7, SPP1, ITGA5, CCL3, SLC11A1, TNFAIP3, RHOB, PDLIM7, CD83, DUSP1, ERRFI1, PDGFA, CCL5, TAPBP, EHD1, JUNB, PHLDB1, NFKBIA, IER3, CCL4L2, CD14, BHLHE40, IL1RN, PTPRE, GADD45B, TSC22D1, TRAF1, GADD45A, SOCS3	Up-regulated
218	SUNG_METASTASIS_STROMA_up	0.00017188	0.00208018	0.516371	2.17198	0	107	TUSC3, COL12A1, THBS2, MAP3K8, TIMP3, SPARC, COL3A1, COL5A1, ANOS1, VCAN, SVEP1, DCBLD2, CNN3, THY1, SNAI2, HSPG2, COL5A2, FBLN2, TMEM47, PSD3, CLDN11, ETV5, JUNB, SOCS5, CD81, CDC42EP3, STK38L, AGRN, ALOX5, TNC, PROS1, BNIP3L, SPSB1, NEAT1, EDEM1, CD59, PLOD2, XYLT1, VMP1	Up-regulated
219	CHEN_LVAD_SUPPORT_OF_FAILING_HEART_dn	0.000185667	0.00208018	0.617443	2.17094	0	42	NRP1, S100A8, PTGIS, GJA1, CTSB, B3GALNT1, JAM2, CXCL12, PLAU, PPP1R3C, GIMAP4, APLNR, TNFSF10, CD14, TGFBI, HBB, CCL21, PTGER4, HEY2, CACNB2, B3GALT2, KCNJ8, CCL2, CRYM, MARCKS	Up-regulated
220	PLASARI_TGFB1_TARGETS_10HR_up	0.000162311	0.00208018	0.473496	2.16782	0	191	INHBA, TIMP3, ADAM12, ITGA5, FBXO32, CNN1, IL6, PTHLH, HECTD2, FLT1, EGR2, GJB2, CHST11, NUAK1, GFPT2, RUNX1, PDGFC, RGS16, TNFAIP3, LMO1, FKBP5, UNC5B, RNF149, TGFB1, CREB3L2, PDGFA, OLR1, LRRC8C, TNFRSF11B, JUNB, SERPINE1, PDGFB, WNT9A, KCTD11, GFOD1, ELAVL2, NES, HIVEP3, STK38L, SPHK1, PPP1R15A, PLEKHG3, TSPAN2, ENPP1, SIAH2, IER3, TNFRSF12A, ENTPD7, MMP9, TNC, IL18R1, BHLHE40, ANKRD1, PRKG2, …	Up-regulated
221	LAIHO_COLORECTAL_CANCER_SERRATED_up	0.000171792	0.00208018	0.516013	2.16492	0	105	LGALS1, SPARC, PALLD, POSTN, DPYD, CAV1, C1S, TCF4, RASSF2, SNRK, HIF1A, CTSB, DPYSL2, PDGFC, PAM, ANXA5, CSRP2, PMP22, PDLIM5, SVIL, EMP3, HLA-DRB1, RIN2, ELK3, PXDN, AP2M1, IL6ST	Up-regulated
222	DORSEY_GAB2_TARGETS_up	0.000186776	0.00208018	0.662657	2.16401	0	30	AKAP12, SPARC, CRYAB, THBS1, ACVR1, COL6A3, COL1A1, GNG11, SMAD7, ARHGAP25, SERPINE1, CD69, GSN, STC1	Up-regulated
223	RAGHAVACHARI_PLATELET_SPECIFIC_GENES_up	0.00017696	0.00208018	0.562924	2.16094	0	64	MYLK, SPARC, THBS1, RAB31, TPM1, TMEM140, PTGS1, F13A1, YPEL5, CCL5, GNG11, CXCL5, VCL, GNAS, MMD, TNFSF4, RGS10, ITGB5, RYBP, HBB, APP, PIP4K2A, RUFY1, RNF11, TSC22D1, PTPN12, PPBP, PGRMC1	Up-regulated
224	KEGG_CYTOKINE_CYTOKINE_RECEPTOR_INTERACTION_up	0.000157233	0.00208018	0.455127	2.15992	0	260	INHBA, TGFB3, CCL22, TNFSF13B, ACVR1, CCL3, VEGFC, PDGFRA, IL6, FLT1, BMPR1B, OSMR, IL1R1, TNFRSF10C, KDR, VEGFB, CCL14, IL17RA, ACVR2A, PDGFC, IL7R, CSF1, CXCL12, TGFB1, IL6R, EPO, IL4R, PDGFA, CCL5, CSF1R, TNFRSF11B, IFNAR1, IL10RA, IL25, PRL, PDGFRB, PDGFB, CCL18, CXCL5, CCL11, IL12B, CNTFR, AMHR2, IL1RAP, CCR4, IL6ST, TNFSF10, IFNE, GH2, TNFSF4, TNFRSF12A, CXCR3, CCL4L2, IFNA16, IL18R1, CCL24…	Up-regulated
227	RUTELLA_RESPONSE_TO_CSF2RB_AND_IL4_dn	0.000154775	0.00208018	0.446028	2.15621	0	308	SPARC, CTSK, SLC2A3, RGCC, AIF1, CCL3, VCAN, LAIR1, VSIG4, PLTP, FPR1, CD163, C3, BCAT1, EGR1, CLEC5A, PECAM1, S100A9, SPOCK1, CTSB, SNX10, CHST15, FCGR1A, TM6SF1, IFITM2, C5AR1, RGS2, TREM1, MEF2C, IRAK3, SOD2, ANXA5, MT2A, BHLHE41, AKR1B1, MS4A6A, SIK3, SGK1, NREP, MCTP1, NCOA1, MCL1, KLF9, STK17B, CDKN1C, SLC43A3, CD300A, MAFB, MX2, CXCL5, SLC36A1, RIN2, TLR1, MT1H, FYN, EPB41L3, S100A12, RHOQ…	Up-regulated
228	CHIANG_LIVER_CANCER_SUBCLASS_INTERFERON_up	0.000188218	0.00208018	0.683303	2.15552	0	26	FCGR2B, ALOX5AP, KCNT2, CALCRL, NNMT, GPR65, FCGR3A, ACSL4, EVI2A, MOXD1	Up-regulated
230	KIM_WT1_TARGETS_8HR_up	0.000165426	0.00208018	0.48119	2.15356	0	163	PCDH7, TIMP3, QKI, RGS4, FGFR1, CHST3, PTHLH, WWTR1, ST3GAL1, GFPT2, PDGFC, ADAM19, PEA15, SNAI2, CSF1, PDE10A, WSB1, ERGIC2, NBL1, IL4R, BCL2A1, GEM, JUNB, SERPINE1, DNAJB4, PLEKHO1, SWAP70, HSPA6, IL1RAP, ADM, PLXND1, RHOQ, IL6ST, KLF10, SPHK1, MARK4, SPEN, MTMR1, DAB2, PEG3, RYBP, BMPR2, HSPH1	Up-regulated
231	SCHRAETS_MLL_TARGETS_dn	0.000185529	0.00208018	0.63879	2.15062	0	34	GREM1, THBS2, CD93, COL6A2, COL6A1, COL6A3, CD53, GAS1, MGP, ARHGDIB, HSPB8, TGFBI, ENPP2, IL1RN, SPRR1A	Up-regulated
232	HESS_TARGETS_OF_HOXA9_AND_MEIS1_dn	0.000174734	0.00208018	0.535293	2.15003	0	81	SLC11A1, VCAN, FPR1, MSR1, EGR2, TRPV2, EGR1, FCGR1A, GPR137B, MS4A6A, DUSP1, CSF1R, CLEC7A, MCL1, EHD1, ANXA1, MERTK, MPEG1, SAMHD1, FPR2, ZFP36L1, LITAF, CYBB, DAB2, CTSS, MMP9, MMP8, P2RY14, TGFBI, CA4, AQP9, MRC1, TF, UPP1	Up-regulated
233	REACTOME_NCAM_SIGNALING_FOR_NEURITE_OUT_GROWTH_up	0.000176741	0.00208018	0.560413	2.14534	0	63	COL3A1, COL5A1, COL6A2, COL6A1, COL6A3, FGFR1, GFRA1, COL5A2, COL4A3, CACNA1S, COL4A1, ST8SIA4, HRAS, FYN, CACNA1I, AGRN, CACNA1G, SPTBN4	Up-regulated
234	MIKKELSEN_MEF_LCP_WITH_H3K4ME3_up	0.000169981	0.00208018	0.499238	2.14532	0	121	INHBA, ANGPTL2, LUM, COL3A1, ASPN, POSTN, COL6A1, HACD4, SERPINF1, NNMT, SNX10, EMP3, ANXA1, PDGFRB, MRGPRF, OGN, IFIT1B, ARHGDIB, ARAP1, ZNF583, ECM1, CASP12, CPA6, GLMP, C20orf96, TMEM176A, IL1RN, OLFML1, RUFY4, HGF, ZFP57, PCOLCE, FBXW10, DDR1, MMP19, PINLYP, CASP4, TBXA2R, CCL2, GAL3ST4, RAB43, OSGIN1, EMILIN1, FHL1, RNF123, IQSEC2, ECM2, TLR4, TNFRSF14, LDB3, P2RX6, GPSM3, TMEM176B, SARDH, T…	Up-regulated
235	CAIRO_LIVER_DEVELOPMENT_up	0.000165344	0.00208018	0.479374	2.1446	0	162	MFAP2, BASP1, AKT3, LXN, PDGFRA, FGFR1, PDPN, COLEC12, GAS1, EMCN, GJA1, CDK14, IGFBP5, PNO1, PDGFC, LPAR4, FAM174B, RHOB, ACKR3, PLS3, COL5A2, CSRP2, TMEM47, EVL, TSPYL4, CD248, PDZD2, PTN, NES, MGAT5, PXDN, ZNF423, GJC1, RARB, ITGA8, SEMA3A, ADGRL2, SLC22A3, CYSLTR1, MORF4L1, NDN, PLOD2, LRP12, RCN1, CPM, PRRX2, TULP4, EDNRB, FKBP10, TMEM50B, TGFB2, PLK2, FZD2, RCN2, CDH16, TRPS1, RRP8, ARMCX2,…	Up-regulated
236	DASU_IL6_SIGNALING_up	0.000359195	0.00259048	0.571855	2.14325	1	57	TNFAIP6, COL6A1, FCHO1, IL6, MMP1, PDPN, HTRA1, VEGFB, SOD2, TGFB1, MMP3, TAPBP, GEM, RGL1, AGRN, DNM1, IER3, ZFP36L2	Up-regulated
237	BROWNE_HCMV_INFECTION_16HR_dn	0.000174095	0.00208018	0.530112	2.14221	0	84	NRP1, FILIP1L, RBPMS, THBS1, COL1A2, GJA1, COL1A1, RUNX1, TPM1, ROR2, TSHB, SLIT2, WNT5A, PDLIM7, SVIL, FBXL2, MT1H, ATP2B4, NR1H3, SEMA3A, FABP3, ANKRD1, FGF2, ZFP36L2, ADAMTS2	Up-regulated
238	HADDAD_T_LYMPHOCYTE_AND_NK_PROGENITOR_dn	0.000177778	0.00208018	0.563398	2.14149	0	61	LGALS1, S100A8, PALLD, CCL3, VCAN, RAB31, SERPINF1, ACSL4, IL7R, MS4A6A, IL6R, F13A1, CSTA, CSF1R, LEF1, TYROBP, MME, LGMN, SPON1, PRTN3, HGF, DNTT, CRIP1, CEBPD, HCK, SLC2A5, CST7	Up-regulated
239	WILENSKY_RESPONSE_TO_DARAPLADIB_up	0.000187441	0.00208018	0.670891	2.139	0	27	NCF1, LAIR1, CHI3L1, ARRB2, HMOX1, EVI2A, CCL5, CD68, CYBB, CTSS, CXCR3, BIN2, NPL, ITGB2	Up-regulated
240	HOLLERN_ADENOMYOEPITHELIAL_BREAST_TUMOR_up	0.000190331	0.00208018	0.755373	2.13848	0	17	MYLK, ACTA2, MYL9, CNN1, SERPINF1, ISLR, IGFBP5, MEF2C, GABBR1	Up-regulated
242	BEGUM_TARGETS_OF_PAX3_FOXO1_FUSION_up	0.000357334	0.00259048	0.565903	2.13651	1	59	PCDH7, MDFIC, DPYD, CALCRL, ADAMTS5, PCDH17, PLN, SLIT2, OMD, PLSCR4, SGK1, PLXNC1, GNG11, STK17B, STX11, GNAS, SH3GLB1, LTBP1, PTPRG, MAN1A1	Up-regulated
243	DELYS_THYROID_CANCER_dn	0.00015921	0.00208018	0.455946	2.13493	0	230	AKAP12, FBLN5, DCN, CPQ, CRYAB, COPZ2, PRKACB, EGR2, EGR1, SDC2, IGF2, GAS1, EMCN, SGCD, FLRT2, CCL14, LRP2, ROR2, RGS16, MPPED2, MEIS2, PLN, LAMA2, ACKR3, SETBP1, PDE10A, CSRP2, CXCL12, DPT, PLA2R1, TSC22D3, CYBRD1, KCNAB1, SFRP1, GNG11, TNFRSF11B, ELMO1, DNAJB4, PTN, MGP, LTF, GRB14, FOSB, MT1H, EPB41L3, OGN, FOLR1, FEZ1, TNFSF10, SRPX, HGD, RGS17, CITED2, ENPP1, DLG2, LPAR1, RYR2, MAGED4, TEK,…	Up-regulated
244	PID_FRA_PATHWAY_up	0.000184706	0.00208018	0.625547	2.13305	0	36	MMP2, DCN, COL1A2, IL6, MMP1, GJA1, JUND, HMOX1, NOS3, PLAU, JUNB, MGP, MMP9, IVL	Up-regulated
245	BIOCARTA_INFLAM_PATHWAY_up	0.000187441	0.00208018	0.668975	2.13289	0	27	TGFB3, IL6, HLA-DRA, CSF1, HLA-DRB5, TGFB1, PDGFA, HLA-DRB1, IFNA1, TGFB2, IL4, CXCL8	Up-regulated
246	WP_MYOMETRIAL_RELAXATION_AND_CONTRACTION_PATHWAYS_up	0.000164908	0.00208018	0.47853	2.13019	0	154	ACTA2, CALD1, GNG2, RGS4, CNN1, IGFBP4, PRKACB, IL6, GJA1, IGFBP5, IGFBP2, RGS16, PRKD1, ARRB2, RGS2, ACKR3, NOS3, IGFBP3, GNG11, PRKCG, ADCY4, RAMP2, IGFBP6, ADM, SLC8A1, GNAS, RGS17, LPAR1, RYR2, RXFP1, YWHAG, GNB4, RGS10, ADCY1, PRKCH, PRKACA, RYR1, RGS3, RGS1, NOS1, YWHAH, ADCY9, RGS14, GNG7, PKIB, RLN1, RGS7, PKIA, RXFP2, RYR3	Up-regulated
247	DAVICIONI_MOLECULAR_ARMS_VS_ERMS_dn	0.000164258	0.00208018	0.470099	2.1293	0	176	MFAP2, FZD7, MMP2, GLT8D2, PRR16, EFEMP2, SNCAIP, COLEC12, NUAK1, ISLR, PTP4A3, BST2, DLC1, LAMA2, COL5A2, GULP1, NAV3, PMP22, TSSC4, PSD3, FNDC3B, RBMS3, FAT4, PLPP3, CD248, EHD1, EMP3, SLC43A3, PTN, TMEM45A, TSPAN9, ADGRA2, RGL1, PARVA, HIF3A, MFAP4, LPAR1, CACNA1G, APLP2, CHMP7, RGS10, ZFP36L2, CYP26B1, SLC1A3, EXT1, MGAT1, FAM110B, RAB32, PTGER4, ASAP3, SIGIRR, PRAME, CRTAP, RHOG, OLFML1, ADG…	Up-regulated
248	TRAYNOR_RETT_SYNDROM_up	0.000186185	0.00208018	0.613978	2.12569	0	39	AKAP12, RGCC, IL6, MMP1, C1R, MMP3, SVIL, TCF21, MOXD1, PTGER3, ACKR4, LRCH2, LTBP1, FNIP1	Up-regulated
249	ZWANG_CLASS_2_TRANSIENTLY_INDUCED_BY_EGF_up	0.00036483	0.00259048	0.584798	2.12456	1	49	INHBA, RGCC, TAGLN, PTHLH, EGR1, FSTL1, BLID, GFPT2, JAM2, GLIPR1, ERRFI1, PXDC1, GLS, KLF10, SPHK1, CITED2, ARHGAP29	Up-regulated
250	HELLEBREKERS_SILENCED_DURING_TUMOR_ANGIOGENESIS_up	0.000176367	0.00208018	0.535438	2.12332	0	76	INHBA, DKK3, VCAN, COL6A1, TAGLN, FBN1, CNN1, IL6, FTH1, NUAK1, CTSB, TNFAIP3, MEFV, IGFBP3, FABP4, TMEM45A, CCL11, ADM, LRP1, CDH2, IL32, TSPAN2, IER3	Up-regulated
251	VART_KSHV_INFECTION_ANGIOGENIC_MARKERS_dn	0.000168606	0.00208018	0.488394	2.12055	0	130	FZD7, MMP2, TIMP3, NRP2, THBS1, PDGFRA, FGFR1, STAB1, PROK2, F7, PDGFC, PLXDC1, RHOB, TGFB1, PTGS1, SFRP1, EFNA5, PDGFRB, PTN, CXCL5, DVL3, GRB14, DIXDC1, RAMP2, SFRP5, FZD10, TNFRSF12A, NOTCH3, FGF2, TIE1, ANGPTL3, WNT7A, HEY2, CFH, LPXN, ADGRB1, HGF, PLG, DVL2, EPAS1, TMPRSS6, SLC19A1, TGFB2, FZD1, CXCL8, MMP19, FZD2, FGFR3, IGF1, FZD3, CCL2, FGF6	Up-regulated
252	MISHRA_CARCINOMA_ASSOCIATED_FIBROBLAST_up	0.000377501	0.00259048	0.683928	2.11935	1	24	CTSK, CTHRC1, COL6A2, COL6A1, EGR1, THY1, PDGFA, PLAU, GEM, PDGFRB, MMP9, TNC	Up-regulated
253	ELVIDGE_HYPOXIA_up	0.000165508	0.00208018	0.471913	2.11349	0	164	AKAP12, CYP1B1, VEGFC, CAV1, LOXL1, LOX, EGR1, KLF7, GJA1, IGFBP5, SPOCK1, DPYSL2, NR3C1, ADGRE2, BNIP3, PAM, AHNAK2, WSB1, CSRP2, ATXN1, DUSP1, IGFBP3, NREP, ZNF654, HLA-DRB1, SERPINE1, PDGFB, TMEM45A, PXDN, FYN, ADM, SRPX, PGK1, PLIN2, CITED2, LIMCH1, BHLHE40, OLFML2A, TGFBI, YEATS2, BNIP3L, STC1, SCNN1B, CXCR4, ATG14, CD59, SFXN3, SCARB1, DST, SAMD4A	Up-regulated
254	ROSS_AML_WITH_MLL_FUSIONS_up	0.000176585	0.00208018	0.534342	2.11241	0	75	LGALS1, ALOX5AP, SRGN, SNX10, FCGR1A, PBX3, ACSL4, MEF2C, ITGAX, ANXA5, CCL5, MFSD1, DEXI, PLD3, FEZ1, CTSL, APOC2, FBP1, COL9A2, TPP1, PHKA2, CPM, ADCY9, WHAMMP3, CES1, KMT2A, SCPEP1, FES, MBNL1	Up-regulated
255	WP_HUMAN_COMPLEMENT_SYSTEM_up	0.000172861	0.00208018	0.510465	2.11184	0	97	DCN, CD93, SPP1, THBS1, VSIG4, C1S, FPR1, C3, C1R, CFI, GNAI2, FCGR3A, LRP2, ARRB2, C5AR1, ITGAX, F13A1, CR1, ALB, ADM, WAS, CRP, APCS, PROS1, PRKACA, ADIPOQ, APOA1, ICAM2, F10, CD59, CFH, GNAI3, ITGB2, PLG, SFTPA2, MBL2, CFHR4, CPN1, ICAM1	Up-regulated
256	HINATA_NFKB_TARGETS_KERATINOCYTE_up	0.000174095	0.00208018	0.521715	2.10828	0	84	TNFAIP6, FN1, IL6, VIM, MMP1, GABARAPL1, PNRC1, TNFAIP3, IL7R, WNT5A, SOD2, GPRC5B, CD83, RARRES1, CCL5, PLAU, BCL2A1, SERPINE1, IL32, NFKBIA, LITAF, ARHGDIB, MMP9, TNC, CFLAR, ESM1, MMP14, IL1RN, CXCL10, TRAF1, GADD45A	Up-regulated
257	RHEIN_ALL_GLUCOCORTICOID_THERAPY_up	0.000177525	0.00208018	0.535997	2.10499	0	73	MNDA, MAP3K8, S100A8, CYTIP, GABARAPL1, ABCA1, GPR65, LY96, RGS2, VNN2, DIDO1, GLIPR1, CSTA, KLF9, CREM, LTF, GLUL, PTPRC, SWAP70, CH25H, ITGAM, P2RX5	Up-regulated
258	REACTOME_SCAVENGING_BY_CLASS_A_RECEPTORS_up	0.000375728	0.00259048	0.720352	2.1036	1	19	COL3A1, COL1A2, MSR1, COLEC12, COL1A1, FTH1, COL4A1, APOB, FTL, APOA1, SCARA5	Up-regulated
259	LINDSTEDT_DENDRITIC_CELL_MATURATION_A_up	0.000178476	0.00208018	0.555294	2.10273	0	60	INHBA, CCL3, IL6, ACVR2A, GPR137B, IL7R, SOD2, FKBP5, CCL5, NFKBIE, CREM, IL12B, SCARF1, RTN1, TNC, CD58, KYNU, CXCL2, PTGER4, IL1RN, CXCL10, EDN1, CXCL8, TFEC, ICAM1, CCL2	Up-regulated
260	WP_FOCAL_ADHESIONPI3KAKTMTORSIGNALING_PATHWAY_up	0.000154703	0.00208018	0.435676	2.10223	0	302	FGF7, THBS2, SPP1, THBS1, COL3A1, ITGA5, SLC2A3, COL5A1, ITGAV, COL6A2, VEGFC, COL11A1, COL1A2, AKT3, FN1, GNG2, PDGFRA, FGFR1, FLT1, OSMR, COL1A1, HIF1A, ITGA11, KDR, VEGFB, PDGFC, LPAR4, LAMA2, IL7R, ITGAX, COL5A2, CSF1, FGF16, NOS3, IL6R, EPO, CREB3L2, IRS4, IL4R, PDGFA, FGF19, CSF1R, GNG11, EFNA5, F2R, FGF14, FGF10, LPAR6, IFNAR1, PRL, PDGFRB, PDGFB, COL4A1, PIK3R5, HRAS, LAMA1, HIF3A, PPP2R2…	Up-regulated
261	AMIT_SERUM_RESPONSE_60_MCF10A_up	0.000358938	0.00259048	0.562361	2.10141	1	56	INHBA, MAP3K8, VGLL3, CALD1, FN1, EGR1, KLF7, GAS1, PNRC1, TNFAIP3, RHOB, SGK1, CYBRD1, PDLIM5, RCAN1, MAFB, STK38L, ELL2, FRMD4B, TNC, BHLHE40	Up-regulated
262	NEWMAN_ERCC6_TARGETS_dn	0.000184775	0.00208018	0.612816	2.10083	0	37	CCDC80, COL11A1, ITGBL1, RGS4, AEBP1, LBH, SGCD, MFAP5, FGF5, PTGS1, SERPINE1, PAMR1, CNTN3, LRCH2, PSG5, NEAT1, ADAMTS1	Up-regulated
263	TONKS_TARGETS_OF_RUNX1_RUNX1T1_FUSION_GRANULOCYTE_dn	0.000375657	0.00259048	0.729611	2.10059	1	18	NCF1, CYP1B1, ALOX5AP, PMP22, FCER1A, IL10RA, CPA3, ALOX5, PILRA	Up-regulated
264	IIZUKA_LIVER_CANCER_PROGRESSION_L1_G1_up	0.000377074	0.00259048	0.709622	2.1005	1	20	MAF, FERMT2, IGFBP4, C1R, IGFBP3, PRCP, ORM1, MT1H, BNIP3L, C6orf120	Up-regulated
265	ROSS_ACUTE_MYELOID_LEUKEMIA_CBF_up	0.000176274	0.00208018	0.524589	2.09986	0	80	SPARC, ADARB1, CAV1, CCND3, CLEC5A, HIF1A, RUNX1T1, ROBO1, RHOB, CIITA, PSD3, TRIM8, HLA-DMB, JUNB, DEXI, SIPA1L1, HPGDS, ATP2B4, BLVRA, MAN1A1, RCBTB1, CD58, VAMP5, HLA-DPA1, HLA-DPB1, PRAME, SLC8B1, BAALC, POU4F1, HOMER2, TBXA2R, CLIP2, MYH11, GALNT14, STK32B, LAT2	Up-regulated
266	PID_TOLL_ENDOGENOUS_PATHWAY_up	0.000377501	0.00259048	0.677071	2.0981	1	24	BGN, S100A8, VCAN, IRAK2, S100A9, LY96, TLR6, TLR1, CD14, IKBKG	Up-regulated
267	LEE_METASTASIS_AND_ALTERNATIVE_SPLICING_up	0.000178094	0.00208018	0.535438	2.09804	0	72	LGALS1, COL6A2, MAP4K4, SMO, PTPRM, MFAP5, BTK, HAPLN3, BNIP3, SHC1, RTN4, BCL2A1, NAIP, F2R, TMEM45A, TSPAN9, MGP, PTK7, LZTR1, L1CAM, ITGB5, STAB2, SRPK2, PLAGL1	Up-regulated
268	OSADA_ASCL1_TARGETS_dn	0.000377501	0.00259048	0.677009	2.09791	1	24	DKK3, CYP1B1, RSPO3, RASSF2, FGFR1, DUSP1, AXL, BCL2A1, PPP1R14A, IGFBP6, TGFBI, AHNAK	Up-regulated
269	ABRAHAM_ALPC_VS_MULTIPLE_MYELOMA_up	0.000188218	0.00208018	0.664913	2.09751	0	26	DCN, FGFR1, A2M, IGFBP5, HMOX1, CXCL12, IGFBP3, PDGFRB, SERPINA1, APP	Up-regulated
270	BERTUCCI_INVASIVE_CARCINOMA_DUCTAL_VS_LOBULAR_dn	0.000368528	0.00259048	0.58968	2.0966	1	44	CAV1, SPARCL1, PECAM1, EMCN, OMD, DPT, POU2F2, MMP3, FABP4, SFRP1, F2R, MRGPRF, MFAP4, TEK, ADIPOQ, TF, ALDH1L1, TNXB, ERG, IGF1, TXNIP, RBP4, PDK4	Up-regulated
271	PODAR_RESPONSE_TO_ADAPHOSTIN_up	0.000167196	0.00208018	0.47788	2.09509	0	138	ZEB1, PALLD, CYTIP, CLEC2B, GABARAPL1, MORC3, FTH1, JUND, PNRC1, RGS2, HMOX1, TMEM140, ITGAX, CSGALNACT2, MGAT2, DUSP1, IGFBP3, FTH1P5, YPEL5, CDKN1C, DNAJB4, ANXA1, CREM, FYN, NCF2, HSPA6, ZFP36L1, HSPB1, MFAP4, PPP1R15A, WDR26, ADAM17, ZFAND5, TMCO3, C16orf72, NEK1, NEAT1, TRIB3, KLF2, ARID5B, NAP1L2, GADD45A, STEAP1, MBNL2, DNAJB2, GTPBP2, ASNS, RAP2B	Up-regulated
272	FOSTER_TOLERANT_MACROPHAGE_dn	0.000151653	0.00208018	0.423199	2.09451	0	390	MNDA, MAP3K8, FILIP1L, ZEB1, COL27A1, CCL22, ITGAV, VCAN, CAV1, AKT3, TCF4, IL6, HIVEP2, DRAM1, KLF7, ADAP2, GJA1, CHST11, CNN3, MAPKBP1, PPFIBP1, SLC30A4, SNX10, RND1, RGS16, NR3C1, TNFAIP3, GYPC, RAI14, GLIPR2, CSF1, FKBP5, NOD1, FOXP4, CD83, ERRFI1, IL4R, DGKH, ATP10A, PDLIM5, SLCO3A1, DCP2, OLR1, F2R, RCAN1, JUNB, TRAF3IP2, SERPINE1, IRF2, ATP9B, RIN2, MMP13, IL12B, TPM4, SAMHD1, CD69, DNAJA2…	Up-regulated
273	ZHENG_GLIOBLASTOMA_PLASTICITY_dn	0.000358938	0.00259048	0.560268	2.09359	1	56	TIMP3, CRYAB, ITGA5, COL6A2, CAV1, THY1, ZDHHC14, CD109, COL4A1, PCMTD2, MERTK, FOSB, DRAXIN, EFS, LPAR1, NISCH, SLC26A2, CNGA2, EPHB1, PLAGL1, TSC22D1, PADI2	Up-regulated
275	BLANCO_MELO_COVID19_SARS_COV_2_INFECTION_CALU3_CELLS_up	0.000153846	0.00208018	0.430723	2.0921	0	322	INHBA, AKAP12, MAP3K8, CYP1B1, FAP, THBS1, CCL22, TNFSF13B, IL6, BCAT1, EGR2, HIVEP2, EGR1, IRAK2, C1R, RND1, IFI16, LRP2, IFITM2, BST2, TNFAIP3, TLR6, CNTN4, ADAMTS6, LAMA2, TMEM140, IFIT5, CSF1, MT2A, NAV3, PHLDB2, TRANK1, DUSP1, LST1, FGF19, CCL5, BCL2A1, KLF9, TNFRSF11B, PRDM1, PDZD2, HDX, SERPINE1, IL10RA, MX2, STX11, MMP13, COL4A1, FOSB, IKZF3, GIMAP2, SAMHD1, CD69, NAV2, TRPC4, KLF10, TNFS…	Up-regulated
277	ZHENG_FOXP3_TARGETS_IN_T_LYMPHOCYTE_dn	0.000184775	0.00208018	0.60983	2.09059	0	37	ST8SIA1, STK10, BCL11B, RCBTB2, LPAR6, LEF1, PTPRC, PTGER3, ANKRD44, CMAHP, CDK17, SCML4, CPE, NRIP1, MS4A4A, JAK1, DPH5, PTK2B	Up-regulated
278	KAAB_HEART_ATRIUM_VS_VENTRICLE_up	0.000157803	0.00208018	0.442227	2.08971	0	251	MYLK, ACTA2, TIMP3, BASP1, EDNRA, SLN, PTGIS, VCAN, TAGLN, AEBP1, TRPC1, VIM, C1R, GAS1, CDK14, ISLR, ARHGAP1, SPOCK1, GABRB3, IL1R1, FLRT2, NR2F2, CCL14, ROR2, RARRES2, GJA5, HSPG2, PAM, FBLN2, SGCE, UNC5B, DPT, EFEMP1, TGFB1, FAM114A1, CREB3L2, RTN4, ETV5, TBX5, SFRP1, SMAD7, CD81, CDO1, MGAT5, ATM, EPB41L3, IGFBP6, ADM, GSE1, FEZ1, CSRP1, FRMD4B, IL1RL1, TPGS2, STAT5B, VAMP5, ZFP36L2, ADORA1, …	Up-regulated
280	WP_SENESCENCE_AND_AUTOPHAGY_IN_CANCER_up	0.000171615	0.00208018	0.499166	2.08837	0	103	INHBA, SPARC, THBS1, COL3A1, COL10A1, CCL3, FN1, IL6, GABARAPL1, COL1A1, IGFBP5, IFI16, TGFB1, IL6R, IGFBP3, PLAU, SERPINE1, ATG13, HRAS, IL6ST, SH3GLB1, GSN, MAP2K1, ING1, LAMP1, ATG14, IGFBP7, MMP14, CREG1, UVRAG, KMT2A, CXCL8, IL24, IGF1, MTOR, SLC39A1	Up-regulated
281	COLIN_PILOCYTIC_ASTROCYTOMA_VS_GLIOBLASTOMA_up	0.000185529	0.00208018	0.620082	2.08764	0	34	DKK3, ANGPTL2, RASSF2, HTRA1, FTH1, SPOCK1, SOD2, GPRC5B, SCRG1, PDZD2, GLUL	Up-regulated
283	SABATES_COLORECTAL_ADENOMA_dn	0.000155063	0.00208018	0.434085	2.08404	0	289	AKAP12, MYLK, PCDH7, DSEL, TUSC3, CCDC80, NCF1, ASPN, DOCK10, FN1, CNN1, RSPO3, RNF152, CPNE8, COLEC12, TBC1D9, MFAP5, FLRT2, LRRN2, TMEM255A, COL14A1, CNTN4, JAM2, TMEM140, AFF3, TMEM200A, SETBP1, CXCL12, DPT, EFEMP1, IL6R, DUSP1, F13A1, FABP4, CCL5, HOXD10, XKR4, LMOD1, WSCD1, SFRP1, PTN, PDE3A, PI15, EPB41L3, INSM1, OGN, LAMA1, ABCA8, ZNF667-AS1, VIP, TLR7, MFAP4, VSTM2A, GPNMB, RTN1, SV2B, RB…	Up-regulated
284	WP_OVERVIEW_OF_NANOPARTICLE_EFFECTS_up	0.000375728	0.00259048	0.71337	2.08321	1	19	AKT3, FN1, IL6, CCND3, HMOX1, PTGS1, NFRKB, COL4A1, CRP	Up-regulated
285	YAMASHITA_METHYLATED_IN_PROSTATE_CANCER_up	0.000356952	0.00259048	0.550056	2.0829	1	60	SPARC, S100A8, SPP1, TAGLN, AEBP1, TRPV2, COL1A1, IGFBP5, ACKR3, DYSF, CSTA, SERPINE1, MMP13, KLK6, GPNMB, RGS17, MMP7, ANKRD1, CALCB, SYT16	Up-regulated
286	LIU_SMARCA4_TARGETS_up	0.000368121	0.00259048	0.577233	2.08046	1	47	MMP2, SPARC, CRYAB, COL3A1, TAGLN, CD53, IFITM2, BST2, CSF1, PARVA, IL32, ECM1, AHNAK, MKX, UPP1, NOS1, TMEM130, PIPOX, IGF1, EBF4, CCL2	Up-regulated
287	MARCHINI_TRABECTEDIN_RESISTANCE_dn	0.000368189	0.00259048	0.581602	2.0774	1	45	ACTA2, COL3A1, LOXL1, FSTL1, RUSC2, NID1, DLC1, PLPP3, ADM, CITED2, CBLB, BHLHE40, NOTCH3, ANKRD1, SLC16A3	Up-regulated
288	BURTON_ADIPOGENESIS_PEAK_AT_2HR_up	0.000368528	0.00259048	0.583378	2.07419	1	44	RHOJ, TNFAIP6, THBS1, IL6, RGS2, RHOB, ACKR3, DUSP1, ERRFI1, JUNB, SERPINE1, DNAJB4, FOSB, ADM, PPP1R15A, CDR2, IER3, CXCL2	Up-regulated
289	KIM_WT1_TARGETS_12HR_up	0.000165426	0.00208018	0.463424	2.07405	0	163	MYLK, FZD7, TIMP3, MYL9, NOX4, FERMT2, PDGFRA, FGFR1, LBH, ST8SIA1, HTRA1, GLI2, TMEM255A, PEA15, THY1, SNAI2, CSF1, BHLHE41, CREB3L2, PSD3, YPEL5, PLAU, CHRNA3, TNS3, KLF9, TNFRSF11B, JUNB, SERPINE1, PLEKHO1, CDC42EP3, HSPA6, IL1RAP, ACSL1, ADM, RHOQ, ATP2B4, DAB2, NFAT5, ITGB5, HSPH1, PRKCH, ADORA1, SLC10A3, KIF3C, TLE3, CHRNA1, SUPT6H, ZCCHC24	Up-regulated
290	BONOME_OVARIAN_CANCER_POOR_SURVIVAL_up	0.000186986	0.00208018	0.630033	2.07275	0	31	IGFBP5, RUNX1T1, GULP1, EFEMP1, PSD3, KCNAB1, FAT4, REV3L, UBL3, ARHGAP6, KL, LIMCH1, CERK, LEPR, THSD7A	Up-regulated
291	BOYAULT_LIVER_CANCER_SUBCLASS_G5_dn	0.000186254	0.00208018	0.643167	2.07254	0	28	RAB31, LAPTM5, ARL4C, CLEC2B, IFI16, SIRPAP1, EMP3, IL10RA, DAB2, ARHGDIB, HLA-DPA1, TGM2, PTGER4, CYBA, HLA-DPB1, IFI44, BCL3, ICAM1, THEMIS2	Up-regulated
292	BROCKE_APOPTOSIS_REVERSED_BY_IL6_up	0.000167448	0.00208018	0.472384	2.07169	0	139	MYLK, MAP3K8, SPP1, SLC2A3, DYRK3, PDGFRA, WIPI1, PHTF2, PNO1, PTP4A3, CHST15, RGS16, AP1S2, POU2F2, SGK1, EVI2A, POLR3F, MCL1, STK17B, PRDM1, JUNB, TPM4, MT1H, CAV2, ELL2, DNAJA2, IL6ST, TNFSF10, ATP2B4, LITAF, LTBP1, PTPRG, DPM1, BHLHE40, ZFP36L2, ST3GAL6, CXCR4, SRPK2, LDLR, SBNO2, DUSP3, TXNDC9, GADD45B, CDK17, GRB2, GADD45A, SOCS3, RCN2, HCK, BCL3, ICAM1, CCL2, HEG1	Up-regulated
293	AMIT_SERUM_RESPONSE_40_MCF10A_up	0.000186047	0.00208018	0.624318	2.0712	0	32	DCN, FPR1, CLIC4, EGR1, RGS2, DUSP1, MCL1, GLUL, FOSB, ADM, CITED2, LGMN, CXCL2	Up-regulated
294	ICHIBA_GRAFT_VERSUS_HOST_DISEASE_35D_up	0.000166306	0.00208018	0.470718	2.07117	0	141	MNDA, S100A8, AIF1, FPR1, CYTIP, LAPTM5, CD53, MSR1, S100A9, NNMT, SNX10, RRAS, FCGR1A, C1QB, TLR6, CCL5, CSF1R, BCL2A1, CD68, HLA-DQB2, TAPBP, HLA-DMB, TRAF3IP2, ORM1, HLA-DRB1, LTF, PTPRC, MPEG1, SAMHD1, TYROBP, PLD3, LITAF, PSMB9, NCOA3, LGMN, IRGM, CYBB, CD74, CTSS, CCL4L2, ORM2, CD14, CXCL2, C1QA	Up-regulated
295	NABA_SECRETED_FACTORS_up	0.000153069	0.00208018	0.424188	2.07047	0	337	INHBA, SFRP4, FGF7, TGFB3, ANGPTL2, S100A8, SFRP2, CCL22, TNFSF13B, CCL3, VEGFC, IL6, IGF2, FSTL1, S100A9, VEGFB, CCL14, THPO, PDGFC, NTF3, WNT5A, CSF1, FGF16, CXCL12, TGFB1, EPO, FGF5, ANGPTL6, PDGFA, CBLN2, FGF19, CCL5, IL17D, SFRP1, FGF14, FGF10, BMP8A, IL25, PRL, PTN, PDGFB, CCL18, WNT9A, CXCL5, CCL11, IL12B, FLG2, WNT8B, EGFL6, S100A12, TNFSF10, ISM1, IFNE, GH2, SFRP5, NRG4, TNFSF4, RPTN, HC…	Up-regulated
296	PID_LYMPH_ANGIOGENESIS_PATHWAY_up	0.000376932	0.00259048	0.67429	2.06865	1	23	ITGA5, VEGFC, COL1A2, FN1, COL1A1, SHC1	Up-regulated
299	MORI_MATURE_B_LYMPHOCYTE_up	0.000173641	0.00208018	0.506263	2.06548	0	89	MAP3K8, ABCA1, PHTF2, GPR65, PEA15, LPP, MEF2C, CD83, MCL1, HLA-DMB, HLA-DRB1, IL10RA, PXK, PTPRC, SAMHD1, ZFP36L1, PTPN6, CD74, CTSS, MAN1A1, PPM1M, MAP2K1, JAK2, SMAP2, FOXD4, MORF4L1, NEAT1, PIP4K2A, ARHGEF3, HLA-DOA, HLA-DOB, POU6F1, NCF4, RGS14, B4GALNT1, SLC4A7	Up-regulated
300	OISHI_CHOLANGIOMA_STEM_CELL_LIKE_dn	0.000157431	0.00208018	0.434806	2.06472	0	262	BGN, DKK3, MFAP2, THBS2, ANGPTL2, ACTA2, BNC2, CYP1B1, MYL9, FAP, NRP2, PALLD, COL3A1, COL5A1, PTGIS, COL6A2, VEGFC, EFEMP2, TAGLN, PLTP, RAB31, FBN1, AEBP1, CACNA2D1, CLEC2B, TRPV2, TIMP1, GAS1, RRAS, ROR2, IRAK3, HSPG2, LRRC32, COL5A2, SGCE, TMEM47, MT2A, EFEMP1, PMP22, PLA2R1, RARRES1, PELI2, MXRA8, CR1, GEM, TCF21, EMP3, MOXD1, TRAF3IP2, IRF2, CCL18, MX2, ADGRA2, RIN2, STX11, ELK3, LRP1, ZFP3…	Up-regulated
301	HUMMERICH_SKIN_CANCER_PROGRESSION_up	0.00017449	0.00208018	0.508431	2.06441	0	87	THBS2, ITGA5, COL1A2, COL6A3, SSPN, COL1A1, GABRB3, IL17RA, CASP8, RGS2, HMOX1, COL5A2, SOD2, IL4R, HLA-DQB2, DOK2, RCAN1, JUNB, BLMH, MMP13, NCF2, GPIHBP1, IFITM3, PGK1, CTSD, TNFRSF12A, MMP9, COL18A1, APOC2, LGALS7, CYBA, MMP14, IL1RN, ITGB1, GADD45B, PLG	Up-regulated
304	GOUYER_TATI_TARGETS_dn	0.000190331	0.00208018	0.728109	2.06129	0	17	TAGLN, A4GALT, FN1, IGF2, PTP4A3, IGFBP2, MCAM	Up-regulated
305	GERHOLD_ADIPOGENESIS_dn	0.000357334	0.00259048	0.545674	2.06014	1	59	FGF7, THBS2, CRYAB, THBS1, VCAN, FN1, GAS1, IL1R1, CASP8, ANXA5, CXCL12, AKR1B1, IL4R, PDGFRB, CD81, SAMHD1, IER3, ECM1, ZNF148	Up-regulated
306	ISSAEVA_MLL2_TARGETS_up	0.000358938	0.00259048	0.551263	2.05994	1	56	PCDH7, COL5A1, LOXL1, FSTL1, A2M, FLRT2, C5AR1, LMO1, AXL, PLAU, SLCO3A1, IGFBP6, PPP2R2B, L1CAM, GSN, FABP3, MEOX1, AHNAK, NPR3, ANXA8L1, CRIP1, ALCAM	Up-regulated
307	DIAZ_CHRONIC_MEYLOGENOUS_LEUKEMIA_dn	0.000170794	0.00208018	0.484552	2.05568	0	112	MNDA, MYLK, S100A8, FGFR1, CD53, CLEC5A, ADAP2, S100A9, DACT1, FCGR1A, ACSL4, JAM2, GPR137B, IL7R, GLIPR1, ANXA5, MS4A6A, F13A1, CSTA, CSF1R, MCL1, HLA-DMB, IL10RA, MAFB, EPB41L3, CDH2, TGFBI, VAMP5, GATA3, CAPN3, SGCB, OAS2, CRHBP, CRYGD, SLC1A3, IL16, NINJ1, KLF2, MYOF, PTPRE, CLEC4A, GADD45B, DNTT	Up-regulated
308	WIEDERSCHAIN_TARGETS_OF_BMI1_AND_PCGF2_up	0.000358938	0.00259048	0.549801	2.05448	1	56	INHBA, CCDC80, TIMP3, COL5A1, CAV1, PTHLH, NAV1, TPM1, ADAM19, IL7R, AXL, ADM, NAV2, KRT75, MMP7, TEK, PAPPA, MYOF, GADD45A, BCL7A, EDN1	Up-regulated
310	CHEBOTAEV_GR_TARGETS_dn	0.000169578	0.00208018	0.478984	2.053	0	119	THBS2, MYL9, NEXN, PALLD, EFEMP2, COL1A2, LOXL1, RSPO3, PCDHB5, IGFBP5, FLRT2, TMEM255A, PRKD1, CXCL12, PHLDB2, IGFBP3, CHIC1, TNFRSF11B, PPP1R3C, ELAVL2, ZFP36L1, DNAJC6, MME, CH25H, PTPN14, S100A3, CHSY3, LIMCH1, CLEC11A, ARSI, PPP2R3A, PTGER4, GPHA2, RSAD1	Up-regulated
311	WANG_CISPLATIN_RESPONSE_AND_XPC_dn	0.00016	0.00208018	0.442021	2.05268	0	215	TNFAIP6, NRP1, FILIP1L, CYP1B1, PRKG1, ACVR1, VEGFC, DYRK3, FERMT2, PDGFRA, NUAK1, HIF1A, RUNX1, ITGA11, MRPL40, INPP5E, IL1R1, KALRN, RRAS, ATP6V1C1, RNF41, GLIPR2, CSF1, HIPK3, TSC22D3, PTGS1, TEAD3, CYBRD1, TOM1, UMOD, CD248, SUSD6, SMAD7, KCNMB1, NT5C2, ATG13, ATP9B, CHMP1B, NMT1, RABEP1, RAMP2, ADM, DNAJA2, STX6, STOM, KLF10, MYO1B, ACKR4, MLLT11, PTPRG, TAF7, SDCBP, TANK, BTN3A1, ATG16L2, Z…	Up-regulated
312	BIOCARTA_NO1_PATHWAY_up	0.000186254	0.00208018	0.637	2.05266	0	28	CAV1, PRKACB, FLT1, KDR, NOS3, PDE3A, BDKRB2, RYR2, CHRNA1, PRKACG	Up-regulated
313	JOHANSSON_BRAIN_CANCER_EARLY_VS_LATE_dn	0.000371333	0.00259048	0.583617	2.05201	1	42	DCN, SPARC, CRYAB, IGFBP4, C3, SPARCL1, GJA1, IGFBP5, GRINA, LRP1, GNAS, CTSD	Up-regulated
314	GROSS_HYPOXIA_VIA_ELK3_AND_HIF1A_up	0.000167616	0.00208018	0.46939	2.05183	0	136	CD93, PALLD, SRGN, LXN, EGR1, RUSC2, PNRC1, RND1, RGS16, BNIP3, PPP1R3B, WSB1, SGK1, ERRFI1, CRTC3, PLPP3, RCAN1, MPP2, DNAJB4, CDC42SE1, FRMD6, KCTD11, CDC42EP3, RCOR1, MERTK, CNOT7, MXD1, PGK1, NFKBIA, SIAH2, TNC, PDPR, KIF5A, ANKRD1, GATA3, CXCL2, DUSP14, NFKBIZ, PTGER4, HIGD1A, HOMER1, GZF1, ZBTB20, EDN1, SLC19A1, PLK2, VWA1	Up-regulated
315	WP_ONCOSTATIN_M_SIGNALING_PATHWAY_up	0.00017696	0.00208018	0.53442	2.05152	0	64	TIMP3, MMP1, EGR1, OSMR, JUND, HIF1A, SHC1, MMP3, JUNB, SERPINE1, MMP13, HRAS, IL6ST, NFKBIA, STAT5B, PRKCH, MAP2K1, JAK2, LDLR, GRB2, SOCS3, JAK1, MTOR, CCL2, PTK2B, MAPK9	Up-regulated
316	ROSS_AML_WITH_CBFB_MYH11_FUSION_up	0.000364166	0.00259048	0.559555	2.04986	1	51	SPARC, NRP1, S100A8, MDFIC, NACC2, PTPRM, S100A9, CHI3L1, CLEC7A, GIMAP4, IL10RA, CD1C, CYBB, CTSS, LPAR1, TGFBI, CLEC10A, NAGA, IGKV1D-17, CLEC4A, MEF2A	Up-regulated
317	REACTOME_SIGNALING_BY_VEGF_up	0.000171792	0.00208018	0.488539	2.04965	0	105	NCF1, NRP1, NRP2, ITGAV, VEGFC, CAV1, AKT3, PRKACB, FLT1, KDR, VEGFB, NOS3, AXL, ELMO1, NCKAP1L, HRAS, FYN, NCF2, HSPB1, SPHK1, CYBB, PRKACA, TRIB3, PAK2, AHCYL1, CYBA, VAV2, PRKACG, PRR5, NCF4, NCK2, CYFIP1, RHOA, MTOR, WASF3, PTK2B	Up-regulated
318	SANA_TNF_SIGNALING_dn	0.000176274	0.00208018	0.51204	2.04963	0	80	BGN, ANTXR1, RHOJ, POSTN, RGS4, IGFBP4, PRKACB, PECAM1, PALMD, CALCRL, EMCN, KDR, AHNAK2, EFEMP1, FHL2, NOS3, DNAJB4, ANXA1, ARHGDIB, ZBTB47, PRKCH, PGAM2, TGM2, THSD7A, ZNF521, MYOF, EPAS1, NFIB, TMSB4X, DDR1	Up-regulated
319	LIANG_SILENCED_BY_METHYLATION_up	0.000186776	0.00208018	0.627505	2.04922	0	30	TIMP3, SRGN, C3, CHI3L1, H19, MFAP5, COX7A1, MMP3, OLR1, LGMN, TNFSF4, PAPPA, SCG5, AQP1	Up-regulated
320	PID_AP1_PATHWAY_up	0.00017819	0.00208018	0.526642	2.0491	0	69	MAF, COL1A2, IL6, MMP1, TIMP1, EGR1, GJA1, JUND, HIF1A, NR3C1, MT2A, TGFB1, DUSP1, FABP4, PLAU, JUNB, BAG1, FOSB, MMP9, NFATC1, ESR1, DMTF1, EDN1, IL4, CXCL8, TCF7L2, CCL2, ETS1, ACTA1	Up-regulated
321	LEI_HOXC8_TARGETS_dn	0.000190331	0.00208018	0.723366	2.04786	0	17	ACTA2, SPP1, TAGLN, CNN1, SERPINF1, GAS1, ADAM19, ELMO1, ANKRD1, PLAGL1, CXCL10	Up-regulated
322	UZONYI_RESPONSE_TO_LEUKOTRIENE_AND_THROMBIN_up	0.000185839	0.00208018	0.605108	2.04768	0	35	MAP3K8, EGR1, RGS2, DUSP1, MCL1, GEM, RCAN1, CREM, ELL2, CITED2, NR4A3, CXCL2, ADAMTS1, KLF2, ARID5B, KCNJ2	Up-regulated
323	WP_ANGIOGENESIS_up	0.000376932	0.00259048	0.666612	2.04509	1	23	TIMP3, PDGFRA, FLT1, HIF1A, KDR, NOS3, PDGFB, MMP9, TEK, FGF2	Up-regulated
324	MCCABE_HOXC6_TARGETS_dn	0.000375657	0.00259048	0.710244	2.04483	1	18	DCN, PDGFRA, PLXDC1, ZBTB7C, ERRFI1, APBB1	Up-regulated
325	KHETCHOUMIAN_TRIM24_TARGETS_up	0.000368732	0.00259048	0.569447	2.04403	1	46	LGALS1, SPARC, SPP1, ITGAV, COL1A2, LAPTM5, VIM, EGR1, IGF2, COL1A1, RAI14, TGFB1, PDGFA, JUNB, SERPINE1, COL4A1	Up-regulated
326	COLIN_PILOCYTIC_ASTROCYTOMA_VS_GLIOBLASTOMA_dn	0.000186254	0.00208018	0.634267	2.04386	0	28	TIMP3, PRRX1, SPP1, FN1, A2M, CHI3L1, COL4A3, PGK1, GPNMB, PLIN2, BHLHE40, TGFBI, NPC2	Up-regulated
327	GUENTHER_GROWTH_SPHERICAL_VS_ADHERENT_dn	0.000376435	0.00259048	0.647824	2.0436	1	26	NRP1, CAV1, FN1, CCND3, MEIS3P1, NR3C1, ANXA5, VCL, CTSD, COL18A1, CD59, ITGB1, TGFB2	Up-regulated
328	WP_MICROGLIA_PATHOGEN_PHAGOCYTOSIS_PATHWAY_up	0.00037237	0.00259048	0.589614	2.04134	1	39	NCF1, FCER1G, FCGR1A, TREM1, C1QB, TREM2, NCKAP1L, NCF2, TYROBP, PTPN6, ITGAM, CYBB, C1QA, SIGLEC7, CYBA, VAV2, ARPC1B, NCF4, ITGB2, C1QC, HCK, LYN, RAC2, VAV3, PIK3CD	Up-regulated
329	PID_S1P_S1P3_PATHWAY_up	0.000186254	0.00208018	0.633448	2.04122	0	28	ITGAV, AKT3, FLT1, GNAI2, PDGFRB, PDGFB, S1PR2, S1PR1, JAK2, CXCR4, GNAI3, RHOA, GNAO1	Up-regulated
330	KEGG_SYSTEMIC_LUPUS_ERYTHEMATOSUS_up	0.000360946	0.00259048	0.548351	2.03997	1	55	FCGR2A, FCGR2B, FCGR2C, C1S, FCGR3B, C3, C1R, FCGR3A, HLA-DRA, FCGR1A, C1QB, HLA-DRB5, HLA-DMB, HLA-DRB1, CD28, SNRPD1, CD86, HLA-DPA1, C1QA, HLA-DPB1, HLA-DOA, HLA-DOB, C1QC, GRIN2A	Up-regulated
332	BROWNE_HCMV_INFECTION_24HR_dn	0.000167196	0.00208018	0.465084	2.03899	0	138	ACTA2, TIMP3, GRIA3, PRKG1, CALD1, THBS1, CAV1, MXRA5, COL6A3, FBN1, GPR176, SSPN, MMP1, PTPRM, IGFBP5, COL5A2, PDLIM7, KCNMA1, IGFBP3, RRAS2, COL8A1, PDGFRB, RIN2, PAMR1, PARVA, SSH1, ABCA8, FIG4, NR1H3, LPAR1, ARHGEF9, SUCLG2, BNIP3L, CFLAR, BST1, SGCB, GRIK2, EXT1, N4BP3, ABCC1, PRKAB2, TPM2, CD59, SLC16A2	Up-regulated
333	REACTOME_NITRIC_OXIDE_STIMULATES_GUANYLATE_CYCLASE_up	0.000375728	0.00259048	0.698133	2.03871	1	19	PRKG1, GUCY1A2, PDE10A, KCNMA1, NOS3, PDE5A, KCNMB1, PRKG2, NOS1	Up-regulated
334	VANHARANTA_UTERINE_FIBROID_up	0.000371333	0.00259048	0.579653	2.03807	1	42	SULF1, MFAP2, COL3A1, EDNRA, FN1, IGF2, COL1A1, CRMP1, COL5A2, COL4A1, NAV2, ART4, COL9A2, PDE8B, LTBP2, TFAP2C	Up-regulated
336	AMIT_EGF_RESPONSE_60_MCF10A_up	0.000184775	0.00208018	0.594076	2.03659	0	37	INHBA, CALD1, IL6, EGR1, KLF7, TPM1, TNFAIP3, DLC1, GLIPR1, PDLIM5, JUNB, IER3, BHLHE40, CXCL2, PTGER4, GADD45A, CXCL8, PLK2	Up-regulated
337	WP_ENDOTHELIN_PATHWAYS_up	0.00018577	0.00208018	0.609667	2.03573	0	33	MYLK, EDNRA, CNN1, CALCRL, NOS3, GNAS, MAP2K1, PLCB1, NPY1R, ADCY10, EDNRB, EDN1, GUCY1B2, ADRB1	Up-regulated
338	DAUER_STAT3_TARGETS_up	0.000368121	0.00259048	0.564255	2.03369	1	47	AKAP12, THBS1, SLC2A3, C3, ABCA1, GFPT2, CTSB, SLC2A14, UGCG, SOD2, PLPP3, KLF11, ADM, LDLR, SAMD4A, SOCS3, SLC4A7, CEBPD, BCL3, ICAM1, CCL2, HEG1	Up-regulated
340	SANA_TNF_SIGNALING_up	0.000175439	0.00208018	0.505843	2.03273	0	82	INHBA, CTHRC1, ITGAV, C1S, SSPN, DRAM1, FTH1, BST2, TNFAIP3, RHOB, IL7R, ACKR3, CSF1, SOD2, MMP3, TAPBP, SERPINE1, MX2, CCL11, SAMHD1, IL32, NFKBIA	Up-regulated
341	WP_INFLAMMATORY_RESPONSE_PATHWAY_up	0.000186776	0.00208018	0.622376	2.03247	0	30	THBS1, COL3A1, COL1A2, FN1, COL1A1, IL4R, CD28, CD86, IL2RA, ZAP70, IL4, LAMB2, VTN, IL2RB, TNFRSF1B, LAMC1, CD40	Up-regulated
342	CROONQUIST_NRAS_SIGNALING_up	0.000184775	0.00208018	0.592601	2.03153	0	37	LGALS1, CCL3, MSR1, TBC1D9, SCGB2A2, CCL5, ST8SIA4, NCF2, CD86, GPNMB, SV2B, CYBB, SDCBP	Up-regulated
343	RUTELLA_RESPONSE_TO_CSF2RB_AND_IL4_up	0.000153163	0.00208018	0.417466	2.0313	0	326	INHBA, MMP2, TNFAIP6, NRP1, FILIP1L, RDX, CYP1B1, ADAM12, SPP1, CCL22, ANOS1, AKT3, CD84, C1S, LXN, SERPINF1, DHCR24, ST8SIA1, MAP4K4, SDC2, FTH1, ST3GAL1, CHI3L1, RUNX1, PTP4A3, IL1R1, ROBO1, ATP6V1C1, SLC12A8, DPYSL2, ADAM19, LPP, SLAMF8, CYTH1, GPR137B, SLC29A3, KCNMA1, APOC1, RFTN1, CD83, UFSP2, RARRES1, PSD3, TNS3, GLS, PLPP3, ACP5, FCER1A, FNBP1, SERPINE1, C3orf18, CCL18, ATP9B, CD81, RGL1,…	Up-regulated
344	TONKS_TARGETS_OF_RUNX1_RUNX1T1_FUSION_HSC_dn	0.000162206	0.00208018	0.443785	2.02987	0	189	MMP2, LGALS1, TIMP3, CYP1B1, FCGR2A, ALOX5AP, LAPTM5, RASSF2, IGFBP4, CCND3, STAB1, IGFBP5, S100A9, JUND, SPI1, IL17RA, IGFBP2, TPM1, ADGRE2, IL7R, CSF1, PRG2, FHL2, PMP22, IL6R, LST1, STK10, TEAD3, CSTA, SLCO3A1, PLXNC1, DUSP10, FADS2, DOK2, FCER1A, SLC43A3, IL10RA, ACSL1, FPR2, EHD3, TYROBP, GSE1, CYBB, P2RX5, FLOT2, TGFBI, SLC16A3, HBB, CFLAR, ZFP36L2, CXCR4, MGAT1, BIN2, RHOH, XYLT1, IL1RN, C…	Up-regulated
345	LIU_VAV3_PROSTATE_CARCINOGENESIS_up	0.000174429	0.00208018	0.503575	2.02964	0	83	CTSK, SPP1, TNFSF13B, FN1, C3, FCER1G, NID1, FABP4, BCL2A1, CCL11, LTF, TYROBP, TNFSF10, MME, GPNMB, PSMB9, CYBB, CD74, CTSS, MMP7, ARHGDIB, TNC, FABP3, C1QA, ADIPOQ, TGM2, PLOD2, CFH, LTBP2, ITGB2, EDNRB	Up-regulated
346	WIERENGA_STAT5A_TARGETS_up	0.000161316	0.00208018	0.441846	2.02959	0	195	FPR3, FCGR2A, SPP1, CCL22, CCL3, COL6A1, A4GALT, GNG2, IGFBP4, GABARAPL1, EGR1, ABCA1, PHTF2, IGFBP5, RNF217, GPR65, SAMSN1, IL7R, SLC2A14, NOD1, CD83, IL4R, GGT5, CCL5, PLAU, FNDC3B, OLR1, STK17B, CDKN1C, RNF144A, NCS1, HSPA6, EGFL6, ADM, PLIN2, BATF3, CH25H, DAB2, PIK3IP1, IL18R1, BHLHE40, TUBB2B, CD1A, TTLL7, CD1B, SMAP2, SLC2A10, TLE3, TGM2, MYO10, RGS1, TRIB3, KLF2, CFH, CXCL10, CLEC4A, GADD…	Up-regulated
347	BLANCO_MELO_COVID19_BRONCHIAL_EPITHELIAL_CELLS_SARS_COV_2_INFECTION_dn	0.000362188	0.00259048	0.547168	2.029	1	54	MYLK, PCDH7, MAF, MXRA5, IRF2BPL, NID1, GULP1, TSC22D3, PDE5A, PTPRZ1, CD86, GPNMB, SEMA3E, OLFML2A, PROS1, EFCAB7, BBOX1, ATG9B, PBX1	Up-regulated
348	OSWALD_HEMATOPOIETIC_STEM_CELL_IN_COLLAGEN_GEL_up	0.000159847	0.00208018	0.437204	2.02835	0	212	FZD7, TNFAIP6, CYP1B1, CCL3, COL15A1, TCF4, FERMT2, FBN1, ARL4C, IL6, EGR1, SLCO2B1, RUNX1, F7, RASSF4, TNFAIP3, RGS2, TREM1, SOD2, SIK3, CD83, SGK1, DUSP1, NREP, BCL2A1, MCL1, KLF9, EHD1, NF1, JUNB, AVPR1A, LEF1, ADNP2, CDC42EP3, SBSPON, FOSB, ZFP36L1, RHOQ, PPP1R15A, NFKBIA, DAB2, IER3, CTSL, CD14, AMIGO2, PAFAH1B2, CXCL2, CRISP2, CFLAR, SPSB1, CTNNBL1, ODF2, PTGER4, BRD4, RGS1, AHCYL1, RAB5C, …	Up-regulated
349	VERRECCHIA_DELAYED_RESPONSE_TO_TGFB1_up	0.000184775	0.00208018	0.591413	2.02746	0	37	MMP2, THBS2, THBS1, ITGA5, IGFBP4, MMP1, SMO, ARHGAP1, EFNA5, COL8A1, DVL3, WNT8B, TNC, FGD1	Up-regulated
350	KEGG_VASCULAR_SMOOTH_MUSCLE_CONTRACTION_up	0.000171145	0.00208018	0.478827	2.02611	0	110	MYLK, ACTA2, MYL9, PRKG1, CALD1, EDNRA, PRKACB, CALCRL, GUCY1A2, KCNMA1, KCNMB1, AVPR1A, PPP1R14A, PRKCG, CACNA1S, PPP1R12B, ADCY4, RAMP2, GNAS, CALML6, MYL6B, ADRA1B, ARHGEF1, ADCY1, PRKCH, MAP2K1, PPP1R12A, PRKACA, PLCB1	Up-regulated
351	KONDO_EZH2_TARGETS_up	0.00015977	0.00208018	0.435533	2.02599	0	217	MYLK, DSEL, TNFAIP6, MAP3K8, SPARC, NRP1, ZEB1, COL3A1, PRR16, ANOS1, C1S, ITGBL1, SSPN, MMP1, WWTR1, GJA1, MAB21L2, COL1A1, ST3GAL1, IGFBP5, NNMT, SPOCK1, CSGALNACT2, GULP1, PPP1R3B, KCNMA1, ELOVL2, KIAA1549L, IL6R, SGK1, IGFBP3, FABP4, YPEL5, RNF144B, RBMS3, BCL2A1, KLF9, ELMO1, LPAR6, SERPINE1, COL8A1, TMEM45A, CXCL5, TYRP1, IQCA1, NAV2, GPC6, PRSS35, TTC28, MEF2D, CNTNAP3, SLAMF6, SLC2A10, AP…	Up-regulated
352	SCHAEFFER_PROSTATE_DEVELOPMENT_12HR_dn	0.000364498	0.00259048	0.554923	2.02452	1	50	INHBA, PRRX1, BASP1, IGFBP4, NUAK1, CRMP1, CXCL12, SUMO3, COL8A1, GAP43, AMHR2, ST3GAL2, TGFBI, CALCB, KLC1	Up-regulated
353	GAURNIER_PSMD4_TARGETS_up	0.00017819	0.00208018	0.516622	2.02027	0	71	CCL3, C3, IL6, IL17RA, HLA-DRA, C5AR1, HLA-DRB5, TGFB1, CCL5, HLA-DQB2, HLA-DMB, HLA-DRB1, CCL18, IL12B, CD86, IL18R1, IL22RA1, HLA-DPA1, CXCL2, IL16, HLA-DPB1, HLA-DOA, CXCL10, CXCL13, CXCL8, CCR3, HLA-DQA1, CCL2, CCR5, C3AR1, CCL1, IFNGR1, IL10, IL7, HLA-A, TGFBR1, HLA-E, HLA-B	Up-regulated
354	GAJATE_RESPONSE_TO_TRABECTEDIN_up	0.000354108	0.00259048	0.52905	2.01962	1	62	NID2, SRGN, CLIC4, IL6, C1R, TNFAIP3, RGS2, UGCG, CSRP2, ANXA1, GOLGA8A, MYH10, FOLR1, GPNMB, GSN, OLFML2A, PROS1, TGFBI, NUCB2, CXCR4, KLRC3, IGFBP7, DDR2, GADD45A, CPE, CRIP1, ASNS, CASP4, TXNIP	Up-regulated
355	MARTORIATI_MDM4_TARGETS_NEUROEPITHELIUM_dn	0.000165044	0.00208018	0.453041	2.0184	0	155	MAF, IRF2BPL, RGS4, PDGFRA, CD53, IGFBP5, XIST, PEA15, C1QB, JAKMIP2, MPPED2, JAM2, GFRA1, CFL2, LST1, F13A1, C1QTNF3, CSF1R, MDM4, NEUROG1, TSPYL4, ZMAT1, ST8SIA4, ELAVL2, FYN, EGFL6, TYROBP, BRSK2, RTN1, SCRN1, KIAA1841, FABP7, FRMD5, SYT11, STMN3, NHLH2, C4orf3, NOL4, MRC1, DLX5, ERMAP, SLC4A5, FOXG1, TAL1, SCG5, GDAP1, NAP1L2, CTSC, ZRANB1, EDNRB, CXCL13, SCG3, MAP2	Up-regulated
356	REACTOME_CLASS_B_2_SECRETIN_FAMILY_RECEPTORS_up	0.00017304	0.00208018	0.489578	2.01791	0	94	FZD7, GNG2, PTHLH, CALCRL, SMO, ADGRE2, WNT5A, GNG11, WNT9A, PTCH2, WNT8B, RAMP2, ADM, FZD9, GNAS, VIP, IAPP, FZD10, GNB4, WNT16, CALCB, CRHBP, GNGT2, CALCR, WNT7A, ADGRE5, WNT4, WNT3, WNT8A, PTH2, UCN2, GNG7, FZD1, SCTR, FZD2, FZD3, GHRH, WNT6, SHH, ADCYAP1R1, GNG10, GNB1, FZD8, GLP1R	Up-regulated
357	ZHENG_FOXP3_TARGETS_up	0.000755002	0.00428791	0.651156	2.0178	3	24	MAP3K8, NRP1, LRRC8C, PRDM1, CREM, ICOS, FRMD4B, PRKCH, CDC42SE2, IL2RA, RHOH	Up-regulated
358	WP_CYTOKINES_AND_INFLAMMATORY_RESPONSE_up	0.000564653	0.00343312	0.639569	2.01756	2	26	IL6, HLA-DRA, CSF1, TGFB1, PDGFA, HLA-DRB1, IL12B, CXCL2	Up-regulated
359	NEMETH_INFLAMMATORY_RESPONSE_LPS_up	0.000174246	0.00208018	0.498249	2.01736	0	85	FCGR2B, CCL3, SLC11A1, SRGN, MSR1, JUND, IFI16, RGS16, ACSL4, WSB1, TGFB1, STK10, ADAR, NFKBIA, IL1RL1, CITED2, MLLT11, IRGM, DAB2, IER3, HCLS1, MAP2K1, CFLAR, SAP30, MYO10, GCH1, DEGS1, RCN1, IL1RN, KPNA3, RNF11, MYADM, GK, CEBPD, SLC20A1, PML, HCK, RHOC, CASP4, LCP2, APBB1IP, C3AR1, TNIP1, FURIN, TNFRSF1B, TPST1	Up-regulated
360	HAHTOLA_MYCOSIS_FUNGOIDES_CD4_up	0.000359195	0.00259048	0.53821	2.01715	1	57	CCL3, EGR1, WIPI1, BST2, RHOB, GLIPR1, SOD2, MCTP1, GLUL, ADM, ABHD5, PPP1R15A, IER3, KYNU, CXCL2	Up-regulated
361	WP_INTERACTIONS_BETWEEN_IMMUNE_CELLS_AND_MICRORNAS_IN_TUMOR_MICROENVIRONMENT_up	0.000186254	0.00208018	0.625711	2.01629	0	28	TGFB3, TLR8, TGFB1, IL4R, CCL5, CD86, TLR7, IL2RA, CXCL10, TGFB2, IL4, CCL2, TLR4, IL2RB	Up-regulated
362	SCHAEFFER_SOX9_TARGETS_IN_PROSTATE_DEVELOPMENT_dn	0.000368189	0.00259048	0.564432	2.01608	1	45	INHBA, FBLN5, BASP1, TCF4, RASSF2, NAV1, CRMP1, SLIT2, TRIM8, NASP, SFRP1	Up-regulated
363	KATSANOU_ELAVL1_TARGETS_up	0.000164501	0.00208018	0.448357	2.01573	0	167	MMP2, COL11A1, LAPTM5, CDKL3, PALMD, EMCN, PTP4A3, ADAMTS5, IGFBP2, OLFML2B, C1QB, IER3IP1, CXCL12, DDAH2, PLEKHH2, PDE5A, KCNMB1, NFKBIE, PPP1R14A, ADGRF5, PDGFB, FBXL7, NES, MPEG1, STOM, KLHL30, IRGM, CYBB, RARB, CTSS, POPDC2, PRSS35, NOTCH3, ANKRD1, NRK, C1QA, ANKRD44, MYL12A, C4orf3, ZNF429, SPSB1, TGM2, FIBIN, PLOD2, OR6C70, CTSC, SLAMF9, HMCN1, SLC16A4, GADD45A, ATP10D, IGF2R, GALNT11, C1QC…	Up-regulated
365	TAKEDA_TARGETS_OF_NUP98_HOXA9_FUSION_6HR_dn	0.000370508	0.00259048	0.570003	2.01503	1	43	INHBA, RGCC, IRAK2, HMOX1, RHOB, IL6R, HTRA3, PDGFA, SERPINE1, PTPRC, CACNA1G, NEAT1, NINJ1, TRAF1, AQP1, CD200, P2RX7, SLC4A2, RARA, KDM6B, VASH1, SPTAN1, CCL2, DYRK1A, GAS7	Up-regulated
366	REACTOME_SEMAPHORIN_INTERACTIONS_up	0.000353482	0.00259048	0.526368	2.01501	1	63	NRP1, MYL9, RND1, CRMP1, RRAS, DPYSL2, TREM2, RHOB, PLXNC1, MYH9, SEMA4D, PTPRC, FYN, PLXND1, MYH10, TYROBP, SEMA3A, SEMA3E, PAK2, ITGB1, PLXNA1, SEMA7A, FES, MYL6, RHOA, RHOC, PLXNA4, MYH11, PLXNB3, SEMA6D, CFL1, DPYSL3, PIP5K1C, DPYSL5, ROCK1	Up-regulated
367	WP_PURINERGIC_SIGNALING_up	0.000186047	0.00208018	0.606845	2.01323	0	32	GNAI2, LPAR4, LPAR6, GNAT1, P2RY13, GNAS, P2RX5, P2RY14, ADORA1, P2RY2, GNAI3, P2RX7, GNAO1, P2RY10, GNAT2, P2RX6, P2RX3, P2RY6, ADORA3	Up-regulated
370	GAL_LEUKEMIC_STEM_CELL_dn	0.000159617	0.00208018	0.430511	2.01008	0	225	MNDA, TNFAIP6, LGALS1, NCF1, S100A8, CYP1B1, CD93, FCGR2A, SLC11A1, COL6A2, VCAN, VSIG4, FPR1, CD163, CLEC5A, ADAP2, S100A9, GPR65, MRC2, CHST15, IGFBP2, LRP2, FCGR1A, MS4A6A, GGT5, CCL5, CSTA, SLC6A6, PLAA, PRDM1, NPAS3, MAFB, ALB, STX11, CDC42EP3, PPP1R12B, NCF2, SAMHD1, S100A12, CD86, KLK6, PTGER3, P2RX5, CACNA1G, MMP9, CXCR3, TEX14, CD14, TEP1, CEP112, COL18A1, TUBB2B, PRKG2, C1QA, KIFC1, SER…	Up-regulated
371	KASLER_HDAC7_TARGETS_1_dn	0.000761325	0.00430744	0.709938	2.00985	3	17	SPP1, COL6A3, C3, IGFBP6, LGMN, EDEM1, IGF2R, ITM2B, TXNIP, TRIP10	Up-regulated
373	WP_PI3KAKT_SIGNALING_PATHWAY_up	0.000153069	0.00208018	0.410508	2.0037	0	337	FGF7, THBS2, SPP1, THBS1, ITGA5, ITGAV, COL6A2, VEGFC, COL6A1, COL1A2, AKT3, FN1, COL6A3, GNG2, PDGFRA, FGFR1, IL6, FLT1, CCND3, IGF2, OSMR, COL1A1, ITGA11, KDR, VEGFB, PDGFC, LPAR4, NTF3, LAMA2, IL7R, CSF1, COL4A3, NOS3, IL6R, EPO, SGK1, CREB3L2, FGF5, IL4R, PDGFA, FGF19, CSF1R, PIK3AP1, MCL1, GNG11, EFNA5, F2R, FGF14, FGF10, LPAR6, IFNAR1, PRL, PDGFRB, PDGFB, COL4A1, PIK3R5, HRAS, LAMA1, PPP2R2…	Up-regulated
374	TAVOR_CEBPA_TARGETS_up	0.00036483	0.00259048	0.551376	2.00314	1	49	AKAP12, RAB31, SERPINF1, S100A9, RGS2, HMOX1, GLIPR1, SOD2, LST1, BCL2A1, KCNMB1, ANXA1, PTPRC, VCL, ACSL1, FIG4, LITAF, TANK, CXCR4, GCH1	Up-regulated
375	PHONG_TNF_RESPONSE_NOT_VIA_P38_up	0.000153092	0.00208018	0.411083	2.00297	0	330	MMP2, NRP2, CALD1, ADARB1, COL6A2, VCAN, COL6A1, SRGN, MMP1, HIVEP2, ABCA1, DRAM1, KLF7, GFPT2, JUND, NR2F2, ROBO1, MEIS2, DSE, MEF2C, TMEM204, RAI14, CSF1, PDE10A, SOD2, BHLHE41, GPRC5B, ETV1, CD83, SGK1, STK10, CNOT2, OGFR, TNIK, PLAU, PDLIM5, SLCO3A1, BCL2A1, PLPP3, C2CD2, TFE3, GEM, EHD1, RCAN1, FNBP1, SERPINE1, IRF2, GRINA, MYH9, CDC42EP3, MED20, CYLD, SYDE1, NAV2, IL6ST, NFKBIA, MMD, PSMB9,…	Up-regulated
376	KORKOLA_YOLK_SAC_TUMOR_up	0.000355556	0.00259048	0.526601	2.00162	1	61	PCDH7, DCN, LUM, SLC2A3, SRGN, C1S, C1R, ROR2, SHISA2, APOA2, MGP, CDH2, TTN, APOA1, CHST13, FRAS1, NEK2, CEBPD, RASSF10, PRTG, CST1, VTN, HAS2, VANGL1	Up-regulated
378	VECCHI_GASTRIC_CANCER_EARLY_dn	0.000153492	0.00208018	0.408384	1.99958	0	350	PCDH7, MAF, CYP1B1, MDFIC, RGS4, CNN1, CYTIP, SVEP1, PRKACB, RNF180, GABARAPL1, LRRC17, RBPMS2, GAS1, BMPR1B, GABRB3, MFAP5, PDGFC, NR3C1, JAM2, PLN, LAMA2, SLIT2, PNOC, BNIP3, AFF3, CFL2, OMD, SETBP1, FKBP5, TMEM47, CXCL12, GUSBP11, DPT, EFEMP1, IL6R, KCNJ15, TSC22D3, F13A1, FABP4, CYBRD1, CCL5, RBMS3, MCTP1, PLPP3, SFRP1, PELI2, KLF9, MAP9, USP51, GLUL, PTPRZ1, ST8SIA4, UBL3, SBSPON, MT1H, ELL2…	Up-regulated
379	BLANCO_MELO_COVID19_BRONCHIAL_EPITHELIAL_CELLS_SARS_COV_2_INFECTION_up	0.000166085	0.00208018	0.453193	1.99716	0	143	INHBA, MAP3K8, S100A8, C1S, C3, IL6, MMP1, IRAK2, DRAM1, C1R, S100A9, RND1, BST2, TNFAIP3, IRAK3, IL7R, SOD2, POU2F2, PRDM1, EHD1, COL8A1, PDGFB, CXCL5, MMP13, SAMHD1, RHOV, S100A12, IFITM3, FEZ1, IL32, NFKBIA, KRT75, IER3, S100A7, CXCL2, STC1, OAS2, TGM2, NFKBIZ, HEPHL1, SPRR2D, KRT6B, SPRR1A, IL36G, EDN1, SOCS3, IFI44, CXCL8	Up-regulated
380	KEGG_ASTHMA_up	0.000374883	0.00259048	0.625439	1.99409	1	27	FCER1G, HLA-DRA, PRG2, HLA-DRB5, FCER1A, HLA-DMB, HLA-DRB1, CCL11, HLA-DPA1, HLA-DPB1, HLA-DOA, HLA-DOB, IL4, HLA-DQA1	Up-regulated
381	HENDRICKS_SMARCA4_TARGETS_up	0.000364166	0.00259048	0.543833	1.99227	1	51	LGALS1, ITGA5, IGFBP4, ARL4C, MMP1, DCBLD2, CTSB, TPM1, THY1, FHL2, EMP3, MT1H, PHLDB1, ATP2B4, AHNAK, PSG5	Up-regulated
382	REACTOME_MUSCLE_CONTRACTION_up	0.000162101	0.00208018	0.434692	1.99136	0	192	MYLK, ACTA2, MYL9, CALD1, SLN, ABCC9, TRPC1, VIM, WWTR1, ANXA6, TPM1, GUCY1A2, PLN, DYSF, KCND2, LMOD1, TBX5, FGF14, ANXA1, TRIM72, MYLPF, KCNE1, TPM4, VCL, SLC8A1, ATP2B4, TTN, SCN3B, KCNJ4, RYR2, MYL6B, FXYD1, ITGB5, SCN11A, MYL12A, PRKACA, RYR1, TPM2, PAK2, AHCYL1, NOS1, FXYD6, SORBS1, SCN4B, KCNK4, KCNJ2, CACNB2, KCNE4, KCNIP3, MYH8, SLC8A2, MYL6, SCN7A, RYR3, KCNK2, ACTC1, ACTA1, MYBPC3, MYH…	Up-regulated
383	PAPASPYRIDONOS_UNSTABLE_ATEROSCLEROTIC_PLAQUE_dn	0.000370508	0.00259048	0.576306	1.98801	1	38	MYLK, DSEL, PTGIS, JAM3, GJA1, PKD2, PAM, CSRP2, LMOD1, KCNMB1, HSPB1	Up-regulated
[truncated: 554 more rows]

[truncated: 30 more sheets: DESE_C2, MUSE_C2, CTDE_C3, CTMU_C3, DESE_C3, MUSE_C3, CTDE_C4, CTMU_C4, DESE_C4, MUSE_C4, CTDE_C5, CTMU_C5, DESE_C5, MUSE_C5, CTDE_C6, CTMU_C6, DESE_C6, MUSE_C6, CTDE_C7, CTMU_C7 …]
