# Supplementary material for: Molecular portraits of colorectal cancer morphological regions
Source: eLife. 2023 Nov 13;12:RP86655. doi: 10.7554/eLife.86655 (PMC10642970; doi:10.7554/eLife.86655)
Supplement: Supplementary file 11. [file elife-86655-supp11.xlsx]

## Sheet: Content
Differential expression analysis of pairs of morphotypes. All pairs of morphotypes
were contrasted (with stage adjustment) and LIMMA result tables are given here.
In every comparison, the second morphotype is the reference, i.e. a positive fold
change refers means higher expression in the first morphotype.
Groups:	(not all necessary present here)
	CT	complex tubular
	DE	desmoplastic
	MU	mucinous
	PP	papillary
	SE	serrated
	TB	solid/trabecular
	NR	tumor-adjacent normal
	ST	tumor-supportive stroma

## Sheet: DE vs CT
Gene	logFC	AveExpr	t	P.Value	adj.P.Val	B
LAMA2	1.02691	-0.0556367	6.52986	1.96839e-08	0.000537411	8.77502
PIEZO2	1.23369	0.107463	6.30088	4.69897e-08	0.000641456	8.00828
COPZ2	1.22653	0.10176	6.10723	9.77612e-08	0.000838491	7.36165
MFAP2	1.08772	0.117874	6.04667	1.22847e-07	0.000838491	7.15986
CD248	0.860647	0.0149601	5.7284	4.05178e-07	0.00203892	6.10438
SNORD114-25	1.51594	-0.0736035	5.7014	4.48081e-07	0.00203892	6.01528
SNORD113-1	1.13343	-0.0575158	5.63059	5.83137e-07	0.0022744	5.78203
SLIT3	1.11262	-0.0542178	5.54854	7.90526e-07	0.00243898	5.51254
LGALS1	1.00836	0.116411	5.53956	8.17259e-07	0.00243898	5.48308
SNORD113-4	1.32391	0.0467331	5.48942	9.83684e-07	0.00243898	5.31888
LOXL1	1.38638	0.0380782	5.47419	1.04057e-06	0.00243898	5.26907
OLFML2B	0.811543	0.133485	5.46612	1.072e-06	0.00243898	5.24271
SFRP2	2.05917	-0.0147423	5.41998	1.27067e-06	0.00266861	5.09206
BICC1	0.950039	0.0635267	5.22413	2.60347e-06	0.00480236	4.45635
SNORD114-28	0.69807	-0.0238545	5.21215	2.71962e-06	0.00480236	4.41766
SNORD114-21	0.902309	-0.0440669	5.20274	2.81436e-06	0.00480236	4.38731
PRDM6	0.568235	0.038485	5.12464	3.73721e-06	0.00600195	4.13592
FGFR1	0.748998	0.032377	5.0804	4.38586e-06	0.00665237	3.99406
TGFB3	1.47566	0.128907	5.05793	4.75665e-06	0.00683505	3.92212
FBN1	0.836116	0.0409423	5.00565	5.74236e-06	0.00783889	3.75519
DZIP1	0.641333	0.050812	4.98336	6.22125e-06	0.00808822	3.6842
PLXDC2	1.0721	0.161395	4.96054	6.75224e-06	0.00837953	3.61161
PLPP4	0.750665	0.171442	4.92837	7.57675e-06	0.00899393	3.5095
VGLL3	0.866635	0.0345977	4.88365	8.88931e-06	0.00978235	3.36792
SPARC	1.2709	0.160424	4.88151	8.95754e-06	0.00978235	3.36114
COL24A1	0.782897	0.112096	4.85365	9.89245e-06	0.0100131	3.27317
PLPPR4	0.791574	-0.0357545	4.85337	9.90231e-06	0.0100131	3.27229
AEBP1	0.996169	0.075198	4.811	1.15116e-05	0.0112247	3.13887
SNORD114-22	0.774087	-0.0157543	4.78642	1.25602e-05	0.0118247	3.06164
PRRX1	1.09504	0.120392	4.77247	1.3196e-05	0.0120093	3.01789
LOX	1.25685	0.142332	4.75349	1.41122e-05	0.0121676	2.95843
LUM	1.42445	0.269726	4.74531	1.45258e-05	0.0121676	2.93284
ANGPTL2	0.796432	-0.0648212	4.73588	1.50176e-05	0.0121676	2.90335
COL1A2	0.827377	0.115439	4.72561	1.55713e-05	0.0121676	2.87128
SPOCK1	0.721	0.154672	4.72101	1.58261e-05	0.0121676	2.8569
XGY2	1.57999	0.270409	4.7037	1.68214e-05	0.0121676	2.80288
FRMD6	0.758429	-0.0583077	4.7022	1.69105e-05	0.0121676	2.79821
RDX	1.26518	-0.0205479	4.70178	1.69353e-05	0.0121676	2.79691
PLSCR4	0.687368	-0.0214092	4.69301	1.74663e-05	0.0122046	2.76957
CYP1B1	0.926645	0.171408	4.68633	1.78808e-05	0.0122046	2.7488
LCA5	0.504046	-0.0124539	4.67207	1.87999e-05	0.0123758	2.70441
FSTL1	0.724111	-0.0501397	4.66848	1.90384e-05	0.0123758	2.69325
PTPN14	0.586492	0.115674	4.65898	1.96834e-05	0.0124976	2.66375
FAT4	0.577411	-0.115071	4.61086	2.32955e-05	0.0141337	2.51458
SNORD114-20	0.836987	-0.0892704	4.57891	2.60439e-05	0.0154576	2.41587
GLI3	0.74713	0.0226489	4.57061	2.68078e-05	0.0155725	2.39028
ITGBL1	0.918288	0.105263	4.56249	2.75757e-05	0.0156848	2.36528
EDNRA	1.14427	0.15009	4.55042	2.87587e-05	0.0157941	2.32811
CCDC80	1.05166	-0.0506091	4.54752	2.90505e-05	0.0157941	2.31918
CDR1	1.11251	-0.0230402	4.54306	2.95033e-05	0.0157941	2.30549
ACTA2	1.174	0.0244941	4.52557	3.13513e-05	0.016376	2.25174
THY1	0.757214	0.123299	4.52156	3.17898e-05	0.016376	2.23944
TRPC1	0.803923	0.0235416	4.50159	3.40675e-05	0.0169452	2.17823
BASP1	0.669205	-0.0722176	4.49491	3.48641e-05	0.0169975	2.15778
SNORD113-2	0.826931	0.0470833	4.48472	3.61152e-05	0.0172985	2.12659
PALMD	0.721917	-0.045554	4.47679	3.71179e-05	0.0173461	2.10237
SNAI2	0.89413	0.0347375	4.47394	3.74852e-05	0.0173461	2.09366
BGN	1.30891	0.352944	4.45992	3.93437e-05	0.0174831	2.05086
MXRA5	0.805772	0.112946	4.45869	3.95119e-05	0.0174831	2.04709
CTSK	1.10013	0.0454321	4.45279	4.03229e-05	0.0174831	2.02912
ADAMTS16	1.43291	0.124884	4.45265	4.03427e-05	0.0174831	2.02869
SNORD114-30	0.798643	0.0508434	4.39331	4.94723e-05	0.0211046	1.84832
TNFAIP6	0.855217	0.167246	4.38172	5.14771e-05	0.0211793	1.8132
CERCAM	0.571667	0.0855828	4.37721	5.22781e-05	0.0211793	1.79956
IGFL1P1	0.687325	0.0932974	4.37489	5.26934e-05	0.0211793	1.79256
EFEMP1	1.18782	-0.0644746	4.37458	5.27504e-05	0.0211793	1.79161
CTHRC1	0.967242	0.232628	4.36765	5.40164e-05	0.0213733	1.77065
VCAN-AS1	0.903565	0.133111	4.35572	5.62631e-05	0.0219442	1.73464
MMP2	0.875435	0.00777573	4.34621	5.81208e-05	0.0223495	1.70593
MEDAG	1.10422	-0.036954	4.33706	5.99641e-05	0.0227381	1.67834
MEG3	0.648406	0.0506276	4.32501	6.24777e-05	0.0233667	1.64207
HTRA1	0.710064	0.0639239	4.30141	6.77017e-05	0.0248504	1.57113
GUCY1A2	0.700218	-0.0375351	4.29897	6.82652e-05	0.0248504	1.56381
TSPAN2	0.66604	0.0981125	4.29292	6.96829e-05	0.0250327	1.54566
SERPINF1	1.08144	-0.0278283	4.27701	7.35461e-05	0.0257679	1.49801
GLT8D2	0.995455	-0.0191008	4.27673	7.36172e-05	0.0257679	1.49716
OGN	1.12613	-0.113433	4.21608	9.03636e-05	0.0312292	1.31622
GEM	0.450606	-0.00176721	4.18776	9.93966e-05	0.0339216	1.23215
FAP	1.39059	0.465966	4.17996	0.000102035	0.0343922	1.20904
BNC2	0.977596	0.0631653	4.17035	0.000105376	0.0346254	1.18062
NHSL2	0.680148	0.0224576	4.1671	0.000106532	0.0346254	1.171
DCLK1	0.688484	-0.142186	4.13558	0.000118383	0.0376555	1.07799
RUNX1-IT1	0.859853	-0.0520712	4.135	0.000118613	0.0376555	1.07627
NAV1	0.642036	0.0548438	4.10768	0.000129929	0.0405432	0.995949
COL5A1	0.707641	0.0720163	4.10595	0.000130679	0.0405432	0.990871
RFTN1	0.722881	-0.00765059	4.09463	0.000135695	0.0416262	0.957681
DLG4	0.582808	0.0298097	4.08463	0.000140283	0.0420878	0.92838
INHBA	0.883599	0.332903	4.0807	0.000142128	0.0421476	0.916864
SFRP4	1.5812	0.419049	4.07766	0.000143569	0.0421476	0.907974
AKAP12	1.1803	-0.00947634	4.07157	0.000146498	0.0425499	0.890183
MEIS3	0.618026	0.0638637	4.05683	0.000153836	0.042896	0.847131
ANOS1	0.712038	0.143098	4.05281	0.000155897	0.042896	0.835406
COL6A3	0.980194	0.208902	4.05045	0.000157117	0.042896	0.828542
UBE2Q2P6	0.548027	0.00788035	4.03694	0.000164299	0.0431938	0.78918
GYPC	0.475068	-0.0157707	4.03578	0.000164929	0.0431938	0.785809
PCDH7	0.878598	0.0775179	4.03531	0.000165186	0.0431938	0.784436
SLC2A3P2	0.571675	0.0696156	4.03254	0.000166702	0.0431938	0.776393
ADAM3B	0.572587	-0.0493328	4.03073	0.0001677	0.0431938	0.771138
FBLN5	0.749217	0.0051261	4.02051	0.000173456	0.0442589	0.741423
ARHGAP31	0.64266	-0.0524849	4.01727	0.000175316	0.0443193	0.732033
HTR2A	0.560396	-0.0518158	4.00247	0.000184075	0.0461065	0.689121
GGT5	0.453982	0.0322386	3.98487	0.000195046	0.0484104	0.638171
LAYN	0.467726	0.00476646	3.95748	0.000213376	0.0515539	0.559152
GFPT2	0.670716	0.0799631	3.94876	0.00021955	0.0520246	0.534063
NR2F1-AS1	0.75278	0.0570371	3.94598	0.000221552	0.0520246	0.52608
WWTR1	0.515701	0.00268692	3.9441	0.000222919	0.0520246	0.520672
SNORD114-5	0.493874	0.0393953	3.94406	0.000222946	0.0520246	0.520565
FERMT2	0.577936	0.0306129	3.92668	0.000235971	0.0545973	0.470641
FGF7	0.56486	-0.132822	3.91767	0.000242999	0.0557509	0.44484
CPXM1	0.520641	0.0340075	3.9067	0.000251843	0.0572986	0.413417
FAM133CP	0.904912	0.0666933	3.89673	0.00026014	0.0574658	0.384931
DSEL	0.667611	-0.0256606	3.89644	0.000260388	0.0574658	0.384095
NRP2	0.970722	0.16013	3.89572	0.000260998	0.0574658	0.382039
GPX8	0.716835	0.0762736	3.88422	0.000270928	0.0587053	0.349231
TAGLN	0.700612	0.0390023	3.869	0.000284629	0.0602399	0.305892
SNORD114-14	1.17712	-0.0291386	3.85643	0.000296451	0.0622592	0.270152
GOLGA8Q	0.544965	-0.0602373	3.85074	0.00030195	0.06293	0.254013
THBS2	0.841638	0.216105	3.83765	0.000314988	0.0651501	0.216896
COL1A1	0.638221	0.104502	3.78358	0.000374799	0.0743589	0.0643451
IGFBP5	0.735265	0.152954	3.78324	0.000375204	0.0743589	0.0633991
ROR2	0.569556	0.0313762	3.7827	0.000375853	0.0743589	0.0618833
FGF7P2	0.488061	-0.0849096	3.77826	0.000381236	0.0744974	0.0494121
POSTN	1.10561	0.227574	3.77742	0.000382264	0.0744974	0.0470504
CALD1	0.734492	0.078885	3.7754	0.000384739	0.0744974	0.0413914
LBH	0.56302	0.0435567	3.74801	0.000419924	0.0795375	-0.0353257
NID2	0.578704	0.00699078	3.74541	0.000423423	0.0795375	-0.0425988
ZEB1	0.74859	0.00329122	3.74417	0.000425092	0.0795375	-0.0460464
ATP2B4	0.610344	0.130193	3.744	0.000425334	0.0795375	-0.0465446
SNORD114-2	0.593798	-0.00427351	3.73921	0.000431872	0.0802108	-0.0599133
CNTN4	0.584831	-0.0733843	3.72714	0.00044879	0.0827897	-0.0935815
SNORD114-12	0.679238	-0.0839445	3.71829	0.00046159	0.0840155	-0.118216
CRMP1	0.579782	0.0170087	3.69635	0.00049485	0.0894728	-0.179148
SULF1	0.941396	0.367754	3.68616	0.000511071	0.0911978	-0.207386
MYOF	0.589326	0.109577	3.67908	0.00052263	0.0924938	-0.226962
ELL	0.325498	-0.0336358	3.67759	0.00052511	0.0924938	-0.231105
CD200	0.949955	-0.0291527	3.67087	0.00053636	0.093272	-0.249657
ARL4C	0.616715	0.0732048	3.66839	0.000540578	0.0934105	-0.256511
RNF144A	0.484791	0.103053	3.65998	0.000555105	0.0942559	-0.279713
ST6GAL2	1.41856	0.279617	3.65957	0.000555827	0.0942559	-0.280851
PDGFRA	0.937146	-0.0884797	3.64558	0.000580853	0.0961119	-0.319376
SERPINE1	0.791681	0.140103	3.63614	0.000598341	0.0978198	-0.345317
GAGE2D	0.372401	-0.0261186	3.63188	0.000606385	0.0985448	-0.356994
SLIT2-IT1	0.367072	-0.0317856	3.62594	0.000617805	0.0998065	-0.373306
MFAP5	0.61737	0.0443401	3.61482	0.000639708	0.102168	-0.40376
MDFIC	0.696192	-0.0324359	3.61472	0.000639905	0.102168	-0.404029
SNORD114-9	0.329164	-0.0144098	3.61196	0.000645465	0.102456	-0.411591
PYGO1	0.522777	0.0564173	3.60889	0.00065169	0.102846	-0.419979
PLEKHH2	0.844355	-0.13952	3.60556	0.000658521	0.103327	-0.429091
RSPO3	0.760076	-0.100219	3.59727	0.000675792	0.105431	-0.451712
CEP295NL	0.731067	0.067206	3.59384	0.000683079	0.105963	-0.461082
COL3A1	0.887462	0.185906	3.58905	0.000693359	0.106349	-0.474131
ABCC9	1.03069	0.115088	3.57637	0.000721326	0.109454	-0.508669
NID1	0.485655	-0.0826076	3.56994	0.000735903	0.110594	-0.526139
ARHGAP1	0.494006	0.0294311	3.56936	0.000737237	0.110594	-0.52772
ADAMTSL4	0.427571	-0.0238594	3.5671	0.000742432	0.110764	-0.533851
ITGA5	0.933183	0.0576755	3.56271	0.00075264	0.111454	-0.545772
MICU3	0.347793	-0.0363827	3.56161	0.00075522	0.111454	-0.548761
ZNF532	0.902091	0.151045	3.55204	0.000777993	0.113504	-0.574692
COL10A1	0.90271	0.35465	3.55055	0.000781585	0.113504	-0.578712
CHST15	0.608026	0.0135979	3.54826	0.000787173	0.113711	-0.58493
PRKD1	0.817204	0.0943747	3.54032	0.000806769	0.114297	-0.606386
ABCA8	0.607934	-0.171095	3.53652	0.000816337	0.114297	-0.616672
RUNX1	0.716047	0.132602	3.53595	0.000817782	0.114297	-0.618215
PTPRM	0.850449	-0.00754088	3.53526	0.000819519	0.114297	-0.620067
COL14A1	0.804145	-0.0563929	3.53394	0.000822873	0.114297	-0.62363
NOX4	0.576186	0.153815	3.53322	0.000824722	0.114297	-0.625587
RUNX1T1	0.510754	0.0476217	3.52944	0.000834413	0.114575	-0.635779
DCN	1.02006	0.0909192	3.52754	0.000839319	0.114575	-0.640892
RASSF2	0.518245	0.0205192	3.52144	0.000855294	0.1156	-0.657337
C3	1.18051	0.129284	3.51663	0.000868106	0.116754	-0.670303
MEG8	0.59963	-0.0688918	3.51325	0.000877206	0.117399	-0.679397
DCBLD2	1.04282	0.213517	3.49455	0.000929216	0.123753	-0.729608
TSPYL2	0.44396	-0.0150643	3.48844	0.000946866	0.123785	-0.746006
EML1	0.406933	0.0370716	3.48757	0.000949388	0.123785	-0.748324
COL12A1	0.809914	0.19841	3.48743	0.000949796	0.123785	-0.748698
MAP7D3	0.619198	-0.0682636	3.48693	0.000951263	0.123785	-0.750043
VSTM4	0.643124	0.0492934	3.47042	0.0010007	0.128268	-0.794178
B3GALNT1	0.377655	-0.0228006	3.4606	0.00103127	0.130956	-0.820385
CACNA1C-IT3	0.592361	0.0738709	3.45702	0.00104263	0.131787	-0.82993
SVEP1	0.477594	-0.0939346	3.44767	0.00107285	0.134887	-0.854805
C1R	0.678188	0.0245298	3.4449	0.00108198	0.134887	-0.862179
TIMP3	0.626846	0.0692845	3.43734	0.00110723	0.136169	-0.882255
CPE	0.561216	-0.0156411	3.43221	0.00112466	0.13641	-0.895844
RCAN1	0.504103	-0.0858894	3.43204	0.00112526	0.13641	-0.89631
RAB31	0.992032	0.203015	3.42817	0.0011386	0.13641	-0.906564
THSD4	0.641615	-0.0816639	3.42801	0.00113916	0.13641	-0.906995
AASS	0.518854	0.0319185	3.41953	0.00116893	0.138012	-0.929437
TVP23CP1	0.436503	-0.00886822	3.41868	0.00117195	0.138012	-0.931675
HECTD2	0.548989	0.0691284	3.41704	0.00117782	0.138012	-0.936021
GREM1	0.731129	-0.0641737	3.40399	0.00122544	0.14237	-0.970492
BLID	0.570695	0.060152	3.39866	0.00124541	0.144077	-0.984543
LIX1L	0.412593	0.0522144	3.38957	0.00128018	0.146855	-1.00848
THBS1	0.595311	0.0259543	3.38006	0.00131754	0.147797	-1.03347
VIM	0.53179	-0.0168941	3.37547	0.00133593	0.147797	-1.04552
EMCN	0.684222	-0.102839	3.37525	0.00133683	0.147797	-1.04611
SNORD113-9	0.439638	0.0287506	3.37518	0.00133711	0.147797	-1.04629
KCNT2	0.643766	-0.0308829	3.37066	0.00135548	0.148624	-1.05814
COL6A1	0.718964	0.0588786	3.36233	0.00138995	0.150006	-1.07995
DNAH17-AS1	0.322139	0.0365797	3.361	0.00139555	0.150006	-1.08344
TUSC3	0.679393	-0.0691978	3.35319	0.00142876	0.152375	-1.10386
MAP9	0.343122	-0.0540566	3.34678	0.00145657	0.153541	-1.12059
COL6A2	0.485782	0.00842484	3.33007	0.0015315	0.158371	-1.16412
CSGALNACT2	0.544618	0.163921	3.32883	0.00153719	0.158371	-1.16734
RGS4	0.660065	0.0244533	3.32641	0.0015484	0.158802	-1.17365
CNTLN	0.399048	-0.0155252	3.3203	0.001577	0.160041	-1.18952
BMPR1B	0.450183	0.0617695	3.31909	0.00158271	0.160041	-1.19266
TCF4	0.689133	0.0298181	3.30184	0.00166642	0.164427	-1.23735
MAST4-IT1	0.48751	-0.0537618	3.30179	0.00166666	0.164427	-1.23747
STEAP4	0.64861	-0.0693029	3.30148	0.00166824	0.164427	-1.23829
PLOD2	0.447509	0.0253002	3.29905	0.00168037	0.164886	-1.24457
ISM1	0.425855	0.0101948	3.29574	0.00169705	0.164886	-1.25313
TM6SF1	0.408773	0.044689	3.29205	0.00171577	0.166113	-1.26264
EPYC	1.0635	0.251624	3.29046	0.00172394	0.166314	-1.26676
FAM168A	0.426852	0.0367339	3.28336	0.00176077	0.168605	-1.28507
SFRP1	0.62912	-0.22177	3.28115	0.00177239	0.168605	-1.29077
MYL9	0.804831	0.0827819	3.27742	0.00179214	0.169641	-1.30037
VEGFB	0.388647	0.0172876	3.27556	0.0018021	0.169658	-1.30517
FAM20C	0.453311	-0.000986867	3.27065	0.00182853	0.170032	-1.31778
UBE2E2	0.555137	-0.0108785	3.27039	0.00182994	0.170032	-1.31844
DKK3	0.719769	0.0465918	3.26906	0.0018372	0.170032	-1.32188
CCDC8	0.446623	0.0330072	3.26117	0.00188068	0.173467	-1.34213
SLCO2B1	0.548971	-0.046449	3.25833	0.0018966	0.174347	-1.34943
LXN	0.697212	0.00570666	3.25158	0.00193484	0.176672	-1.3667
LRP1	0.51672	0.0138489	3.24906	0.00194934	0.17703	-1.37316
EMP1	0.755282	0.0387087	3.24865	0.00195172	0.17703	-1.37422
SEC24D	0.666169	0.00981691	3.23147	0.00205331	0.183201	-1.41812
MGP	0.8547	0.0147941	3.2284	0.00207198	0.184264	-1.42595
CIRBP	0.561656	-0.0991376	3.2171	0.00214205	0.189263	-1.4547
MSR1	0.508054	0.0574887	3.21037	0.00218487	0.191641	-1.47181
MXRA8	0.615328	0.102629	3.19818	0.00226442	0.197112	-1.50271
SPTLC3	0.49595	-0.0588933	3.1978	0.00226699	0.197112	-1.50369
ADAM12	0.819887	0.134057	3.18901	0.00232609	0.200337	-1.52592
CLDN11	0.432213	0.123895	3.18431	0.00235833	0.202475	-1.53781
JAM2	0.798678	-0.163189	3.17762	0.00240485	0.205179	-1.55468
VCAN	0.911138	0.229665	3.17345	0.00243437	0.206408	-1.56521
LY96	0.746162	0.0809824	3.17017	0.00245774	0.207102	-1.57345
MSC	0.390713	0.00674916	3.167	0.00248061	0.208387	-1.58145
CFAP54	0.652625	-0.0256569	3.16391	0.00250299	0.208978	-1.5892
PLS3	0.631592	0.192369	3.16128	0.00252231	0.209313	-1.59583
RPS16P5	0.453908	-0.0214488	3.15619	0.00255991	0.210123	-1.6086
MN1	0.311355	0.00387921	3.15098	0.002599	0.211815	-1.62167
RHOJ	0.584617	-0.104256	3.14438	0.00264939	0.214416	-1.63823
SMARCA1	0.451472	-0.0637722	3.13294	0.00273873	0.219202	-1.66682
RPL4P6	0.390901	-0.0106117	3.13154	0.00274988	0.219202	-1.67032
SULF2	0.618473	0.101051	3.12689	0.00278714	0.220564	-1.68192
KLF9	0.450657	-0.0325996	3.12556	0.0027979	0.220775	-1.68524
PIK3R5	0.454464	0.0355191	3.11928	0.00284918	0.223899	-1.70089
MAPKBP1	0.314951	-0.0210264	3.11871	0.00285388	0.223899	-1.70231
EIF5A2	0.45589	0.0830375	3.11644	0.00287268	0.224085	-1.70796
PRR16	0.52836	-0.000222191	3.11371	0.00289542	0.22472	-1.71475
HYDIN2	0.55746	0.0710557	3.11349	0.00289728	0.22472	-1.71531
SGIP1	0.792809	0.169056	3.10705	0.00295166	0.227205	-1.73132
HMCN1	0.420505	0.0410718	3.10604	0.00296028	0.227205	-1.73383
DPT	0.723427	-0.138533	3.10576	0.00296261	0.227205	-1.73451
POLI	0.378024	-0.110846	3.09251	0.00307791	0.233473	-1.76737
FLJ42393	0.398239	-0.0469709	3.0881	0.00311718	0.23445	-1.77829
ADAMTS9-AS2	0.540631	-0.0232206	3.08651	0.00313143	0.234874	-1.78221
GXYLT2	0.689964	0.047943	3.08295	0.00316363	0.23664	-1.79101
GLIS3	0.578303	0.00348147	3.07932	0.00319681	0.238468	-1.79999
RNF180	0.401414	-0.0012751	3.07687	0.00321937	0.239467	-1.80603
NREP	0.542135	0.0101651	3.07094	0.0032745	0.239808	-1.82064
TMEM200A	0.614027	0.287889	3.06885	0.0032942	0.240024	-1.82579
TENM4	0.404178	0.0734748	3.06692	0.00331244	0.240442	-1.83054
LRRC17	0.788766	0.108208	3.0593	0.00338547	0.242599	-1.84929
SPARCL1	1.00843	-0.0652963	3.05521	0.00342525	0.243232	-1.85933
TPM4	0.338351	-0.00886615	3.05473	0.00342995	0.243232	-1.8605
SLC5A4P1	0.279008	-0.0249006	3.0398	0.00357922	0.249923	-1.8971
ASAP3	0.43375	-0.027513	3.03755	0.00360222	0.250778	-1.9026
SH3PXD2B	0.395398	0.0617219	3.03036	0.00367669	0.252663	-1.92017
CEACAMP11	0.370755	0.0312112	3.02823	0.00369897	0.252663	-1.92536
GNG11	0.565068	-0.00126282	3.02586	0.00372397	0.252915	-1.93114
MAB21L2	0.767701	0.0825871	3.01682	0.0038208	0.256863	-1.95317
PODNL1	0.417963	0.104827	3.015	0.00384053	0.256863	-1.95759
UNC5B	0.373987	0.0163608	3.01442	0.00384684	0.256863	-1.959
PARD6G	0.324233	0.0212987	3.0131	0.00386134	0.256863	-1.96222
PDZD2	0.41662	-0.0852575	3.01233	0.0038697	0.256863	-1.96408
CLIC4	0.407038	0.0165745	3.0064	0.0039353	0.259521	-1.9785
ANTXR1	0.929805	0.224607	3.00356	0.00396704	0.259731	-1.98538
OMD	0.602264	0.0586698	2.9972	0.00403904	0.262999	-2.00081
SMIM10	0.406193	-0.0324616	2.99057	0.00411535	0.266249	-2.01685
WDR72	0.355968	0.0172207	2.98786	0.00414694	0.267028	-2.02341
PXDC1	0.578413	-0.00280317	2.98281	0.00420645	0.269227	-2.03561
NBL1	0.397966	0.0772139	2.98162	0.00422054	0.269227	-2.03848
GOLGA8N	0.652078	-0.0611355	2.97537	0.00429542	0.270942	-2.05354
EMP3	0.531684	-0.0532432	2.97524	0.00429705	0.270942	-2.05387
TMEM130	0.361911	0.0405774	2.97262	0.00432877	0.272263	-2.06017
RCAN2	0.564588	-0.185136	2.97149	0.00434257	0.272263	-2.06289
EPS8L1	0.343015	-0.00797768	2.9637	0.00443862	0.274402	-2.08163
SLC16A4	0.510641	0.0526036	2.96296	0.00444793	0.274402	-2.08342
PIP5K1C	0.347931	0.0377818	2.96118	0.00447015	0.274402	-2.08768
CC2D2A	0.421025	0.010629	2.95925	0.00449445	0.274402	-2.09232
SERPINH1P1	0.408579	-0.0475122	2.95896	0.00449811	0.274402	-2.09302
NISCH	0.544361	0.12883	2.95695	0.00452346	0.274402	-2.09783
CSPG4P10	0.334246	0.00819469	2.955	0.00454837	0.274402	-2.10253
ITGA11	0.354816	0.0655328	2.95344	0.0045682	0.274402	-2.10625
RYR2	0.390557	-0.0768299	2.95175	0.00458987	0.274402	-2.1103
OSMR	0.430116	-0.0362465	2.95172	0.00459029	0.274402	-2.11038
CDK14	0.54962	-0.0721553	2.95165	0.0045912	0.274402	-2.11055
ZCCHC24	0.413699	0.0122011	2.9511	0.00459831	0.274402	-2.11187
CNN3	0.655745	0.0348346	2.94884	0.00462752	0.274402	-2.11729
CSRP2	0.517427	-0.0945076	2.9483	0.00463446	0.274402	-2.11857
TSPAN9	0.450587	0.010996	2.94761	0.00464339	0.274402	-2.12022
BHLHE41	0.841764	0.0335038	2.94299	0.00470385	0.276777	-2.13129
PLN	0.476867	-0.0164199	2.93616	0.0047945	0.280299	-2.14761
SRGAP2C	0.544252	0.0195833	2.93394	0.0048242	0.280786	-2.15289
ZNF705A	0.41641	0.0486368	2.93228	0.00484666	0.280786	-2.15686
ADAM22	0.79153	0.0362782	2.92862	0.00489638	0.282154	-2.16558
TNFAIP8	0.388389	0.00134555	2.92307	0.00497271	0.284209	-2.1788
ANXA1	0.754812	0.153328	2.91659	0.00506314	0.286199	-2.1942
DSG4	0.307643	0.0207914	2.91442	0.00509384	0.287223	-2.19937
EFEMP2	0.40496	0.00499144	2.91285	0.00511607	0.287223	-2.20309
EGR2	0.400865	-0.0109202	2.90179	0.00527553	0.291727	-2.22929
ZNF521	0.334685	0.0130873	2.90062	0.00529267	0.291727	-2.23206
SLC12A8	0.619124	0.172639	2.8949	0.00537731	0.293589	-2.2456
GPATCH2L	0.438699	0.0153497	2.89459	0.00538192	0.293589	-2.24634
PLXND1	0.441403	0.0182902	2.89261	0.00541142	0.293589	-2.251
BNIP3P16	0.282321	-0.0201227	2.89002	0.00545042	0.294386	-2.25713
AHNAK2	0.686001	0.0727147	2.88965	0.00545598	0.294386	-2.258
SNORD113-6	0.473246	0.090305	2.88759	0.00548714	0.294901	-2.26286
SLC16A2	0.301136	0.0641973	2.8824	0.00556642	0.297989	-2.27509
MTND1P2	0.317654	-0.0515053	2.88138	0.00558219	0.298234	-2.27751
CLMP	0.369868	-0.00883741	2.88068	0.00559285	0.298234	-2.27913
WBP1L	0.513402	0.0128058	2.87865	0.0056244	0.29875	-2.28393
RPS12P5	0.343714	-0.0435535	2.8747	0.00568594	0.300817	-2.29321
FBXO32	0.764058	0.0232871	2.87334	0.0057074	0.300817	-2.29642
S1PR2	0.38874	0.0696251	2.86934	0.00577066	0.301456	-2.30582
ACVR1	0.452847	0.033838	2.86724	0.0058041	0.301456	-2.31074
NUAK1	0.473454	0.0841139	2.86647	0.00581634	0.301456	-2.31254
ITGB5	0.432712	0.0231829	2.86631	0.00581889	0.301456	-2.31291
SH3PXD2A	0.375239	-0.050542	2.86442	0.00584922	0.302095	-2.31734
SH3D21	0.473435	0.0573508	2.86417	0.00585336	0.302095	-2.31794
LRRC23	0.410993	0.00695642	2.86338	0.00586611	0.302182	-2.3198
FNBP1	0.456537	-0.0381174	2.85588	0.00598828	0.305592	-2.33736
AZIN2	0.414489	0.0377395	2.8511	0.00606737	0.307331	-2.34854
FLNA	0.495915	0.0574514	2.84698	0.00613635	0.309676	-2.35816
LMO7-AS1	0.50663	0.0654247	2.83625	0.00631933	0.313452	-2.38317
LSAMP	0.388514	0.0766451	2.83444	0.00635076	0.313541	-2.3874
ZNF90P3	0.281397	-0.018743	2.83	0.00642831	0.315129	-2.39772
TSHZ2	0.580446	0.100925	2.82136	0.00658159	0.320304	-2.41777
UBE2Q2P1	0.322521	0.0645698	2.81692	0.00666188	0.322139	-2.42807
ASPN	0.874516	0.270443	2.81541	0.00668928	0.322139	-2.43156
FGF7P1	0.35398	-0.0591189	2.81541	0.00668928	0.322139	-2.43156
DOCK10	0.369532	-0.0862689	2.81508	0.00669533	0.322139	-2.43233
SLFN11	0.365123	-0.0125818	2.81279	0.00673711	0.322766	-2.43762
RFTN2	0.574924	-0.0237641	2.81271	0.00673857	0.322766	-2.4378
RBMS2	0.457064	0.00355471	2.80992	0.00678995	0.323931	-2.44426
VCL	0.430656	0.0569026	2.80779	0.0068294	0.323931	-2.44918
NEXN	0.729158	0.0597676	2.80771	0.00683094	0.323931	-2.44937
IL1RL1	0.395889	-0.0786895	2.79316	0.00710616	0.330515	-2.48293
VTRNA1-3	0.572666	0.0117602	2.79107	0.00714663	0.331269	-2.48775
PRG4	0.40362	0.0321849	2.78566	0.00725203	0.335017	-2.50018
ALPK2	0.4474	0.0618303	2.77989	0.00736611	0.337044	-2.51343
NR4A3	0.619301	0.0323098	2.77876	0.00738878	0.337044	-2.51603
LRRC32	0.363558	0.0751466	2.77727	0.00741843	0.337044	-2.51943
NEK7	0.373466	0.077898	2.7755	0.00745418	0.337044	-2.52351
GABBR1	0.479416	-0.0675532	2.77391	0.00748606	0.337044	-2.52713
DGKG	0.288923	-0.100096	2.77366	0.00749112	0.337044	-2.5277
RBPMS2	0.432864	-0.0102727	2.77014	0.00756262	0.337929	-2.53576
ITGA8	0.333013	-0.0247797	2.76669	0.0076335	0.339983	-2.54367
ARHGEF25	0.328876	-0.000447071	2.761	0.00775131	0.344108	-2.55666
B3GALT4	0.383992	-0.0554205	2.75743	0.00782627	0.345611	-2.56481
MS4A4E	0.434613	-0.0690768	2.75708	0.00783364	0.345611	-2.56561
DCLK2	0.495844	0.0395142	2.75131	0.00795599	0.3481	-2.57874
ITPRIP	0.318264	-0.0256236	2.74834	0.00801966	0.349647	-2.5855
PALLD	0.564533	0.106117	2.74724	0.00804354	0.349689	-2.58802
SLFN12	0.337664	0.00464853	2.73866	0.00823063	0.353379	-2.60749
C1QTNF3	0.439825	0.00354615	2.7343	0.00832745	0.354662	-2.61739
RPS20P22	0.291184	0.0587427	2.73243	0.00836909	0.355354	-2.62161
SORCS2	0.279756	0.010425	2.72908	0.00844456	0.356754	-2.62921
CDKL1	0.360705	-0.0287627	2.72836	0.0084607	0.356754	-2.63082
CKAP4	0.286845	-0.0205431	2.72094	0.00863021	0.362495	-2.64761
FILIP1L	0.716345	0.0180292	2.71922	0.00866993	0.363047	-2.65149
CHRDL1	0.606004	-0.0365918	2.71842	0.0086884	0.363263	-2.65329
RHOB	0.38388	-0.0109853	2.71559	0.00875426	0.364899	-2.65968
TNRC18P1	0.294544	-0.00717278	2.71382	0.00879552	0.365271	-2.66365
AVPR1A	0.362134	-0.0124076	2.71362	0.00880017	0.365271	-2.6641
COLEC12	0.768878	-0.0517231	2.70891	0.00891141	0.366826	-2.67472
TMEM47	0.425977	0.0734355	2.70882	0.00891354	0.366826	-2.67492
OR4D10	0.218695	-0.00857623	2.70792	0.00893486	0.366826	-2.67694
KLF7	0.443814	0.0674786	2.70658	0.00896686	0.367137	-2.67996
AKAP13	0.535277	-0.0871035	2.70637	0.00897181	0.367137	-2.68043
CHST11	0.486857	0.0162156	2.70591	0.00898277	0.367137	-2.68146
CMTM3	0.474818	0.000646329	2.70444	0.00901791	0.367837	-2.68476
GRIA3	0.60946	-0.135837	2.69841	0.00916363	0.371617	-2.6983
SUSD6	0.401612	0.0379091	2.69532	0.00923916	0.371617	-2.70524
ZBTB40	0.323262	-0.014592	2.69464	0.00925596	0.371617	-2.70677
KLF11	0.354864	0.0255567	2.69436	0.00926264	0.371617	-2.70738
SKI	0.363398	0.0997465	2.69434	0.00926323	0.371617	-2.70743
NPHP4	0.273235	0.0298541	2.69409	0.00926932	0.371617	-2.70799
SHOX2	0.397151	0.0449259	2.69208	0.00931889	0.372707	-2.71249
SRY	0.339827	-0.0599833	2.69188	0.00932381	0.372707	-2.71294
RBMS3	0.529251	-0.138035	2.69064	0.00935456	0.37276	-2.71572
GAS1	0.299706	0.000398214	2.68956	0.00938139	0.372825	-2.71814
KCND2	0.385509	0.0418634	2.68806	0.00941869	0.372875	-2.72149
C1S	0.73597	0.0647485	2.68759	0.00943044	0.372875	-2.72254
SSPN	0.832993	0.122442	2.68674	0.00945185	0.372875	-2.72445
IRAK3	0.465325	0.0206161	2.68556	0.00948126	0.372875	-2.72708
OR8X1P	0.312874	-0.00567572	2.6846	0.00950556	0.372875	-2.72924
MILR1	0.391399	-0.0452635	2.68323	0.00953994	0.373686	-2.73228
F2R	0.335036	0.0426261	2.68249	0.00955861	0.373734	-2.73393
ADGRL2	0.339421	-0.0449471	2.68007	0.00962007	0.37521	-2.73934
CD99	0.380903	0.0368217	2.67936	0.00963817	0.37538	-2.74093
LHX5-AS1	0.274796	0.0291085	2.67819	0.00966811	0.376009	-2.74355
VAMP2	0.339024	-0.0223893	2.67703	0.00969776	0.376626	-2.74613
HECW1-IT1	0.34373	-0.0514163	2.67245	0.0098159	0.378214	-2.75635
ZNF423	0.338562	0.0224211	2.67181	0.0098324	0.378214	-2.75776
UBE2Q2P11	0.298163	-0.0612323	2.67169	0.00983561	0.378214	-2.75804
KDR	0.337723	0.0304883	2.66886	0.00990919	0.380507	-2.76432
GAB3	0.41092	-0.0996097	2.66469	0.0100187	0.381729	-2.77359
GOLGA8M	0.352924	0.0210093	2.66403	0.0100363	0.381729	-2.77507
CCDC88A	0.510104	-0.0185909	2.6588	0.0101753	0.3846	-2.78667
DPYD	0.703357	0.00220935	2.65672	0.0102313	0.385291	-2.79129
FNDC1-IT1	0.410284	0.0746021	2.65377	0.010311	0.386977	-2.79783
MEIS1	0.497521	0.018768	2.64667	0.0105052	0.391708	-2.81355
CDC42BPA	0.361498	-0.0434973	2.64473	0.0105587	0.391708	-2.81783
TNC	0.414679	0.01192	2.6445	0.010565	0.391708	-2.81833
ZFPM2	0.342027	-0.0418168	2.64398	0.0105794	0.391708	-2.81948
SNORD114-4	0.305318	0.0425462	2.64372	0.0105868	0.391708	-2.82006
IGKV2-38	0.256597	-0.0167234	2.64264	0.010617	0.391708	-2.82246
IFI16	0.700061	0.00122097	2.64033	0.0106814	0.39228	-2.82755
NR2F2	0.563319	-0.0680537	2.6399	0.0106933	0.39228	-2.82849
SMAD7	0.43285	-0.0579579	2.639	0.0107187	0.39228	-2.83049
RIMKLB	0.487087	-0.0280581	2.63778	0.010753	0.392732	-2.83318
LAPTM5	0.465369	0.0123801	2.63707	0.010773	0.392732	-2.83474
ACKR3	0.469296	0.0187378	2.63544	0.010819	0.393634	-2.83833
SRGAP2B	0.438078	0.0592464	2.63513	0.0108277	0.393634	-2.83901
MYCBPAP	0.352876	0.0196288	2.63415	0.0108556	0.393999	-2.84117
ZNF300P1	0.278746	0.043345	2.63275	0.0108955	0.393999	-2.84426
OR52E3P	0.293993	0.00054577	2.63021	0.0109681	0.394065	-2.84984
ADCY4	0.350505	-0.0922366	2.62964	0.0109844	0.394065	-2.8511
CDKN2B-AS1	0.299177	0.00520354	2.62642	0.0110775	0.395342	-2.85819
CFH	0.343405	-0.0692983	2.62258	0.0111889	0.395442	-2.86661
MEIS2	0.647997	0.154486	2.62105	0.0112339	0.395442	-2.86999
TP53INP2	0.284073	0.0235462	2.62075	0.0112426	0.395442	-2.87064
SPSB1	0.235275	-0.0165408	2.6187	0.0113028	0.395442	-2.87513
GNAI2P1	0.431544	0.0280738	2.61859	0.0113061	0.395442	-2.87537
P4HA3	0.36065	0.0573401	2.61746	0.0113395	0.395442	-2.87785
ZC2HC1A	0.561079	0.106745	2.61732	0.0113436	0.395442	-2.87816
TMEM127	0.281526	0.0581781	2.61486	0.0114165	0.395442	-2.88354
PDGFRL	0.321142	0.0386659	2.61362	0.0114535	0.395442	-2.88626
TRPV4	0.357874	0.00226702	2.61202	0.0115014	0.395442	-2.88977
ALOX5AP	0.446222	0.113797	2.61169	0.0115112	0.395442	-2.89049
GSN	0.349368	-0.140925	2.61043	0.0115491	0.395442	-2.89325
NRP1	0.445884	-0.0558866	2.60973	0.0115703	0.395442	-2.89479
COL11A1	0.58455	0.272608	2.60829	0.0116137	0.395442	-2.89793
DYNC2H1	0.399049	-0.00114832	2.60664	0.0116634	0.395442	-2.90152
RPL7AP56	0.24938	-0.0363214	2.60663	0.0116638	0.395442	-2.90155
CLIC2	0.485997	-0.0898784	2.60326	0.0117666	0.395442	-2.90892
IL6STP1	0.319633	-0.0167233	2.60175	0.0118126	0.396201	-2.9122
NAP1L3	0.274847	0.0414002	2.59928	0.0118886	0.397153	-2.91759
TRAJ45	0.434449	-0.0137658	2.59741	0.0119467	0.397897	-2.92168
PACS1	0.230182	0.0299775	2.59191	0.0121182	0.400906	-2.93364
GPR183	0.640668	0.00800371	2.59142	0.0121338	0.400906	-2.93473
ARSG	0.449059	0.088708	2.59108	0.0121443	0.400906	-2.93545
GTF2IP2	0.27476	-0.0326854	2.58231	0.0124231	0.405527	-2.9545
RAB9BP1	0.21559	-0.0370912	2.58203	0.0124323	0.405527	-2.95512
ZNF861P	0.345717	-0.0445675	2.58023	0.0124903	0.405826	-2.95902
C1orf162	0.542452	-0.0232774	2.5802	0.0124911	0.405826	-2.95908
DNM1P34	0.266142	-0.0339218	2.5713	0.0127816	0.411514	-2.97835
SIK1	0.532772	0.0422026	2.56828	0.0128814	0.41174	-2.98487
TEAD3	0.276787	-0.031534	2.56803	0.0128899	0.41174	-2.98542
PNMA6B	0.256972	0.0234684	2.565	0.012991	0.41174	-2.99197
SPDYE1	0.285745	0.020416	2.56487	0.0129953	0.41174	-2.99225
CLU	0.618367	-0.0281504	2.56449	0.013008	0.41174	-2.99306
SYNPO	0.314737	0.0116841	2.56448	0.0130082	0.41174	-2.99308
GTF2F2P1	0.266704	0.019165	2.56366	0.0130358	0.41174	-2.99485
PMP22	0.556394	-0.0271586	2.56286	0.0130626	0.411819	-2.99658
DAB2	0.534401	0.0397914	2.55956	0.0131741	0.412646	-3.00369
SHISA4	0.36921	0.0475289	2.55546	0.0133136	0.415413	-3.01251
SNORA54	0.602129	0.010072	2.55378	0.0133712	0.416254	-3.01613
FLNC	0.347323	0.0462562	2.54939	0.013523	0.418645	-3.02558
TMEM156	0.344285	-0.064416	2.54886	0.0135412	0.418645	-3.02671
RAC1P9	0.247662	0.00112346	2.54657	0.0136212	0.419232	-3.03163
C7	0.428028	-0.068104	2.54184	0.013787	0.420409	-3.04176
GOLGA8O	0.37002	-0.0538567	2.54176	0.0137898	0.420409	-3.04193
SRSF1P1	0.250426	0.0739703	2.53869	0.0138987	0.420409	-3.04851
SRPX2	0.583214	0.175449	2.53771	0.0139337	0.420409	-3.05061
SULT6B1	0.250812	-0.0467816	2.53678	0.0139668	0.420409	-3.0526
RGCC	0.683113	0.148341	2.53641	0.0139802	0.420409	-3.0534
KIF4CP	0.244039	-0.0282862	2.53608	0.0139921	0.420409	-3.05411
KIAA0825	0.37991	-0.103448	2.53542	0.0140154	0.420409	-3.0555
PTGIS	0.414828	-0.0927149	2.53396	0.0140679	0.420409	-3.05863
CDH2	0.395169	0.0146207	2.53283	0.0141085	0.420409	-3.06104
LTBP4	0.432945	-0.131081	2.53274	0.0141118	0.420409	-3.06124
ARHGAP28	0.309926	-0.0613982	2.53061	0.0141889	0.42107	-3.06579
NR3C1	0.6062	-0.0561897	2.52864	0.0142604	0.421418	-3.06999
TIMP1	0.613397	0.213828	2.52823	0.0142753	0.421418	-3.07087
SIGLEC9	0.192943	0.0307604	2.52817	0.0142778	0.421418	-3.07101
USP50	0.371789	-0.0231579	2.52198	0.0145049	0.423544	-3.0842
UBE2Q2P12	0.325653	-0.0260759	2.52038	0.0145641	0.424364	-3.0876
CD93	0.451784	0.00638774	2.51705	0.0146883	0.424522	-3.09469
FN1	0.80694	0.321817	2.51696	0.0146915	0.424522	-3.09487
A4GALT	0.401546	-0.0276189	2.51673	0.0147001	0.424522	-3.09537
ADAM19	0.284777	-0.0248843	2.51484	0.0147709	0.424522	-3.09938
LEF1-AS1	0.400008	0.000679133	2.51478	0.0147733	0.424522	-3.09951
TNFSF4	0.306567	0.00172496	2.5146	0.01478	0.424522	-3.09989
LEF1	0.363725	0.149778	2.51385	0.0148085	0.424522	-3.1015
MT-TQ	0.373911	-0.0826443	2.51264	0.014854	0.424522	-3.10406
DCHS1	0.46387	-0.0188964	2.51232	0.0148662	0.424522	-3.10475
SLIT2	0.4092	-0.012166	2.50758	0.0150463	0.427911	-3.1148
RERGL	0.268857	-0.085284	2.50377	0.0151926	0.429901	-3.12288
PREX1	0.606351	-0.0485242	2.50214	0.0152554	0.430271	-3.12632
SNORD113-3	0.516582	0.0328071	2.50053	0.0153178	0.431241	-3.12973
C3orf18	0.396153	0.00863804	2.49912	0.0153728	0.431799	-3.13271
PDLIM3	0.246324	0.0710095	2.49662	0.0154705	0.433899	-3.138
DZIP3	0.29959	0.0303528	2.49535	0.0155203	0.433899	-3.14068
TMEM45A	0.382957	0.072239	2.49519	0.0155265	0.433899	-3.14101
SNORD114-3	0.481481	-0.0708717	2.49437	0.0155588	0.433899	-3.14275
CYBRD1	0.724579	-0.0363669	2.49154	0.0156709	0.435689	-3.14873
IGFBP3	0.589758	0.238528	2.49089	0.0156966	0.435959	-3.15009
IGHG4	0.943451	0.183384	2.48918	0.0157649	0.43604	-3.15371
OPTN	0.295899	0.0210679	2.48869	0.0157843	0.43604	-3.15474
CYP7B1	0.437282	0.0246421	2.48841	0.0157953	0.43604	-3.15532
LRCH2	0.278129	-0.0245663	2.48608	0.0158888	0.437735	-3.16024
DYTN	0.221037	0.0548616	2.48458	0.0159491	0.438708	-3.1634
VEGFC	0.434665	-0.017409	2.48312	0.0160082	0.438804	-3.16648
CPA3	0.590749	-0.322762	2.48169	0.016066	0.438804	-3.16948
KANK2	0.351037	0.0433232	2.48122	0.0160851	0.438804	-3.17047
ALDH1L1-AS2	0.303775	0.0289284	2.47892	0.0161785	0.439508	-3.17529
COL8A1	0.299697	0.0908637	2.47575	0.0163085	0.439666	-3.18196
PHLDB2	0.485029	-0.0300357	2.4757	0.0163107	0.439666	-3.18207
MSRB3	0.38792	0.00721629	2.47515	0.0163331	0.439666	-3.18322
FZD7	0.488201	0.00334037	2.47511	0.0163348	0.439666	-3.1833
TUBB4BP4	0.258219	0.0143867	2.47485	0.0163454	0.439666	-3.18384
COMP	0.245991	0.0480301	2.47221	0.0164546	0.440504	-3.18939
NFATC4	0.276126	-0.0435541	2.4685	0.016609	0.441213	-3.19716
DNM1	0.39158	0.12652	2.46802	0.0166291	0.441213	-3.19817
ACTG1P13	0.267237	-0.0403399	2.46434	0.0167836	0.443329	-3.20587
PCDH11X	0.35783	0.0864706	2.46327	0.0168288	0.443922	-3.2081
SNORA69	0.482854	-0.019518	2.46283	0.0168473	0.443981	-3.20902
MOS	0.278971	-0.0411078	2.46164	0.016898	0.444593	-3.21152
RPL9P16	0.33996	-0.0358728	2.46123	0.0169152	0.444593	-3.21236
ZDBF2	0.514219	-0.0321795	2.45927	0.0169988	0.445095	-3.21647
TIGD6	0.311028	0.0207266	2.45606	0.0171364	0.447701	-3.22317
NPTX1	0.256323	-0.0291509	2.45426	0.0172139	0.448021	-3.22692
MYLK	0.597475	-0.0367874	2.45294	0.0172707	0.448443	-3.22966
ZNF831	0.254469	-0.00116525	2.45085	0.0173613	0.448443	-3.23401
GMNC	0.278894	-0.0219958	2.44912	0.0174369	0.448443	-3.23762
UCHL1-AS1	0.233301	-0.0335015	2.44858	0.0174604	0.448443	-3.23874
PDLIM5	0.358429	0.0353123	2.44796	0.0174876	0.448443	-3.24003
ADPRH	0.361112	0.0133795	2.44723	0.0175197	0.448443	-3.24156
HMGN1P16	0.317658	-0.0606052	2.44719	0.0175214	0.448443	-3.24164
DUXAP8	0.518485	0.138732	2.44626	0.017562	0.448529	-3.24356
KLK10	0.428418	0.1533	2.4436	0.0176793	0.448814	-3.24909
WSB1	0.439534	-0.124846	2.44303	0.0177046	0.448814	-3.25028
DYDC1	0.256162	0.0530351	2.44281	0.0177145	0.448814	-3.25074
NOP14-AS1	0.380207	-0.00654286	2.44133	0.0177802	0.448814	-3.25382
ZNF652P1	0.295893	-0.0527272	2.44087	0.0178005	0.448814	-3.25477
TMEM109	0.274992	-0.0466754	2.44081	0.0178033	0.448814	-3.2549
DNAJB5	0.296334	-0.00918358	2.4363	0.0180048	0.452257	-3.26425
BLOC1S6	0.378228	0.0802414	2.4332	0.0181447	0.454484	-3.27067
ZNF271P	0.331116	-0.00837766	2.43266	0.0181692	0.454543	-3.27179
HOXC9	0.57198	0.234484	2.43084	0.0182518	0.45585	-3.27556
GPATCH11	0.31589	0.01311	2.42555	0.0184935	0.457347	-3.28648
TRPC6P	0.273331	-0.0144544	2.42424	0.018554	0.458013	-3.28919
ZKSCAN7	0.382532	0.00240684	2.42335	0.0185951	0.458458	-3.29102
TUSC7	0.29276	-0.0148128	2.42313	0.0186056	0.458458	-3.29149
AGAP2	0.363905	-0.00653531	2.42091	0.0187084	0.459744	-3.29606
C4orf17	0.30058	0.0215413	2.41963	0.0187678	0.460273	-3.29869
EN1	0.240456	0.0163153	2.41885	0.0188044	0.460273	-3.3003
ADGRF5	0.506262	0.0746047	2.41852	0.0188201	0.460273	-3.30099
PLEKHG1	0.432596	0.0167715	2.41828	0.018831	0.460273	-3.30148
DNM1P33	0.2527	-0.0266873	2.41593	0.0189414	0.462144	-3.30633
HAVCR2	0.273718	0.0151623	2.41527	0.0189722	0.462327	-3.30767
TMEM135	0.360383	0.0210945	2.41276	0.0190911	0.462327	-3.31285
PPP1R14A	0.364295	-0.0385024	2.41053	0.0191968	0.463404	-3.31742
SLC9A9	0.290933	-0.0204367	2.40795	0.0193199	0.464323	-3.32272
ARPP19	0.335058	0.048948	2.40594	0.0194167	0.465013	-3.32686
ZNF48	0.22893	-0.0571723	2.40507	0.0194584	0.465602	-3.32864
SEMA6A-AS1	0.253729	-0.00605392	2.39827	0.0197886	0.468948	-3.34258
FLJ43663	0.409015	-0.045371	2.39795	0.0198043	0.468948	-3.34323
IGKV2-28	0.686699	-0.146194	2.39642	0.0198792	0.4695	-3.34636
CPNE8	0.445939	-0.103946	2.39533	0.019933	0.469909	-3.3486
SLC18A3	0.266045	-0.0168155	2.39423	0.0199872	0.470422	-3.35084
MB21D2	0.330488	0.0535306	2.39352	0.0200222	0.470792	-3.35229
ZNF25	0.408807	0.0893479	2.39139	0.0201275	0.471392	-3.35663
RBMS1P1	0.357148	0.0222241	2.39023	0.0201854	0.471392	-3.35901
ANO1	0.423624	-0.0329953	2.39011	0.0201913	0.471392	-3.35925
MAN1B1	0.251246	0.0120507	2.38886	0.0202536	0.471392	-3.3618
ZSCAN20	0.198083	-0.0441846	2.38874	0.0202595	0.471392	-3.36204
GJA1	0.285278	0.00938533	2.3883	0.0202815	0.471392	-3.36294
ICE2P1	0.2906	-0.0145829	2.38742	0.0203258	0.471392	-3.36474
IGFBP7	0.480871	0.182492	2.38739	0.0203271	0.471392	-3.36479
MORF4L1P1	0.487012	-0.0129268	2.38523	0.0204355	0.472093	-3.36919
SLITRK4	0.357992	0.0513096	2.38328	0.0205339	0.473052	-3.37317
ADAMTS1	0.584068	-0.21419	2.38325	0.0205358	0.473052	-3.37325
SNORA63	0.504969	-0.136012	2.37687	0.0208605	0.476996	-3.38622
SWAP70	0.378175	-0.0110096	2.37578	0.0209166	0.47748	-3.38844
COQ5	0.31435	0.0439054	2.37487	0.0209634	0.477748	-3.39028
TFEC	0.569757	0.0963617	2.37305	0.0210573	0.478645	-3.39397
TRBV14	0.264432	0.00163235	2.37144	0.0211406	0.479386	-3.39724
LPP	0.416064	-0.0215597	2.36958	0.0212375	0.480649	-3.40102
GABARAPL1	0.678553	0.0152815	2.3693	0.0212518	0.480649	-3.40157
CMAHP	0.289186	0.03228	2.36929	0.0212524	0.480649	-3.4016
PDIA2	0.262186	0.0244048	2.36868	0.0212843	0.480649	-3.40283
PYHIN1	0.330253	-0.0517354	2.36744	0.021349	0.481712	-3.40534
CLIP4	0.274581	0.00635126	2.36282	0.0215922	0.484331	-3.4147
STAB1	0.347929	-0.175767	2.36249	0.0216099	0.484331	-3.41537
KLHDC2	0.309573	0.00172001	2.36221	0.0216248	0.484331	-3.41594
ITGAV	0.335281	0.0434644	2.36146	0.0216646	0.484427	-3.41746
FRY	0.294027	-0.0655901	2.3608	0.0216995	0.484811	-3.41879
EGR1	0.479513	-0.0334239	2.36	0.0217421	0.485367	-3.42041
IGBP1P5	0.268449	-0.0296774	2.35963	0.0217614	0.485401	-3.42114
LAMB1	0.511529	0.0711993	2.35807	0.021845	0.4858	-3.4243
F3	0.572053	-0.0405805	2.34524	0.0225402	0.493643	-3.45014
ISLR	0.353386	0.024938	2.34512	0.0225468	0.493643	-3.45039
NRBP1	0.304083	0.0528525	2.34381	0.022619	0.494023	-3.45302
GLIPR1	0.435796	0.0343323	2.34351	0.0226356	0.494023	-3.45363
PBRM1	0.275311	-0.0389337	2.33881	0.0228959	0.496556	-3.46305
DSE	0.414572	0.081471	2.33875	0.0228994	0.496556	-3.46318
NRK	0.237151	0.039506	2.33807	0.0229375	0.496556	-3.46454
RHOC	0.386584	-0.0173744	2.33708	0.0229926	0.496556	-3.46652
SNORD113-5	0.363564	-0.0438197	2.33573	0.0230681	0.496556	-3.46922
FLNB	0.265781	0.000162533	2.33553	0.0230796	0.496556	-3.46964
PSKH1	0.215444	-0.0303571	2.33508	0.0231046	0.496556	-3.47053
GLIPR2	0.2965	0.0135204	2.33487	0.0231164	0.496556	-3.47095
RAB32	0.347135	0.0194257	2.33307	0.0232179	0.497954	-3.47456
RSPH10B2	0.234202	0.0394212	2.33208	0.0232741	0.498767	-3.47655
AP1M1	0.237569	0.0204074	2.33021	0.0233799	0.498956	-3.48028
SNORD67	0.318172	-0.0185467	2.32812	0.0234986	0.499267	-3.48445
LYVE1	0.376733	-0.0666018	2.32728	0.0235468	0.499774	-3.48614
MTCO2P3	0.190618	-0.0507242	2.32706	0.0235591	0.499774	-3.48657
COX6CP14	0.276449	-0.0449219	2.32525	0.0236628	0.500611	-3.49018
HSPG2	0.416604	0.0644847	2.32455	0.0237032	0.500886	-3.49159
QKI	0.408759	-0.0161379	2.32384	0.023744	0.501139	-3.493
PCOLCE	0.230074	0.022339	2.32307	0.0237886	0.501139	-3.49455
MTND2P16	0.332701	0.0441773	2.3212	0.0238963	0.50215	-3.49826
ALKBH8	0.241305	-0.0574882	2.32058	0.0239325	0.50215	-3.49951
DUSP1	0.507858	0.0240858	2.32052	0.0239356	0.50215	-3.49962
IGKV3-20	0.880926	-0.0975681	2.32033	0.0239469	0.50215	-3.50001
CD200R1	0.283827	-0.0675085	2.3192	0.0240126	0.50242	-3.50226
NPM1P9	0.247954	-0.00103663	2.31708	0.0241359	0.502472	-3.50647
MT1IP	0.321219	-0.0736286	2.31659	0.0241647	0.502472	-3.50745
APOD	0.940839	0.196295	2.31455	0.0242841	0.50342	-3.51151
DST	0.64153	-0.0994962	2.31335	0.0243545	0.50435	-3.51389
SSH1	0.242024	0.00346897	2.31146	0.0244663	0.50435	-3.51765
SRGAP2D	0.35394	0.0864494	2.31118	0.0244828	0.50435	-3.51821
ZEB2-AS1	0.238317	-0.0379362	2.31108	0.0244887	0.50435	-3.5184
TBC1D22A	0.250904	-0.00979913	2.311	0.0244934	0.50435	-3.51856
FAM89B	0.273595	0.00588569	2.31065	0.0245141	0.50435	-3.51926
PLCXD3	0.279077	-0.0100588	2.30835	0.0246509	0.50435	-3.52383
R3HDM2P1	0.260204	-0.0724473	2.30796	0.0246741	0.50435	-3.5246
PIGFP3	0.249538	-0.00329303	2.30689	0.024738	0.50435	-3.52673
GSTA6P	0.240778	-0.0387504	2.30624	0.0247764	0.50435	-3.528
EBF4	0.277258	-0.0163445	2.3026	0.0249954	0.506625	-3.53523
HMGB1P15	0.252189	0.0188586	2.30165	0.0250524	0.5068	-3.5371
STARD8	0.241761	-0.0200385	2.3015	0.0250616	0.5068	-3.53741
IGKV2D-38	0.265411	0.0180074	2.30023	0.0251381	0.507422	-3.53991
UGCG	0.356179	0.0123529	2.29971	0.0251696	0.507519	-3.54094
SCAPER	0.304573	-0.0149268	2.29926	0.0251974	0.507704	-3.54184
EVL	0.529486	-0.0637562	2.29359	0.0255434	0.512003	-3.55304
NALCN-AS1	0.251038	0.014574	2.29279	0.0255926	0.512003	-3.55462
JAG1	0.321534	0.0498492	2.29219	0.0256294	0.512003	-3.5558
BCAT1	0.37537	0.109566	2.29173	0.0256579	0.512003	-3.55671
IGLL3P	0.209027	-0.028413	2.28852	0.0258566	0.513642	-3.56304
TMEM256P2	0.266569	0.030386	2.28732	0.0259311	0.513759	-3.5654
HYI	0.284516	-0.00267928	2.28681	0.0259631	0.513759	-3.56642
SLC16A6	0.237769	0.03712	2.28615	0.0260039	0.513759	-3.56771
RPS4XP12	0.245801	0.00112934	2.28563	0.0260364	0.513806	-3.56873
CXCL12	0.450828	-0.114728	2.28417	0.026128	0.514502	-3.57161
PSMC1P3	0.234695	0.0277559	2.28387	0.0261469	0.514502	-3.5722
CPXM2	0.400226	-0.0237193	2.28332	0.0261812	0.514502	-3.57328
LONRF1	0.354082	0.0231724	2.28276	0.0262164	0.514502	-3.57438
GDI1	0.265141	0.0227055	2.28189	0.026271	0.514896	-3.57608
ELOVL5	0.509119	0.0974695	2.27749	0.0265497	0.515391	-3.58474
MSANTD3-TMEFF1	0.29024	-0.0408503	2.27727	0.0265637	0.515391	-3.58517
SPON1	0.334147	0.0204892	2.27509	0.0267023	0.51704	-3.58943
TBCEL	0.41038	-0.0567799	2.2746	0.0267335	0.51704	-3.59039
IGKV2D-28	0.488966	-0.137809	2.27428	0.0267544	0.51704	-3.59103
GAGE1	0.240659	-0.0739929	2.27361	0.026797	0.51704	-3.59233
CEP170	0.273874	0.0248812	2.27169	0.0269208	0.517769	-3.59611
TGFB2	0.435241	-0.0158395	2.27108	0.0269595	0.517769	-3.59729
FKBP14	0.298551	0.0391478	2.26932	0.0270736	0.517769	-3.60075
CSPG4P13	0.207787	0.0142305	2.26921	0.0270803	0.517769	-3.60095
AGPAT4-IT1	0.272689	0.00495864	2.26736	0.0272006	0.517899	-3.60458
CDKN2B	0.218927	0.0439713	2.26598	0.0272899	0.518119	-3.60727
YIPF3	0.371725	0.0745055	2.26542	0.0273269	0.518119	-3.60837
TCF7L1-IT1	0.291505	-0.0407813	2.26243	0.0275222	0.520008	-3.61421
CCDC144NL-AS1	0.317786	0.0265141	2.25957	0.0277105	0.522096	-3.61979
IDSP1	0.376189	-0.0180795	2.25896	0.0277507	0.522096	-3.62097
KLF7-IT1	0.266954	-0.0077426	2.25342	0.0281192	0.524631	-3.63176
CHST10	0.320365	0.00569007	2.25323	0.028132	0.524631	-3.63213
LDB2	0.362841	0.0524015	2.25292	0.0281529	0.524663	-3.63274
SGK1	0.503489	-0.172165	2.25237	0.0281899	0.524879	-3.63382
MBNL1	0.491488	-0.00881294	2.25131	0.0282609	0.524879	-3.63587
TDO2	0.394304	0.00402922	2.2507	0.028302	0.524879	-3.63706
UBR1	0.335934	-0.070922	2.2489	0.0284233	0.525398	-3.64056
PDZRN3	0.23055	-0.0576279	2.24791	0.02849	0.526276	-3.64248
SLC30A4	0.320743	-0.112627	2.2455	0.0286535	0.528271	-3.64715
MMP14	0.303063	0.125953	2.24534	0.0286645	0.528271	-3.64747
LRRC8E	0.283642	0.0563234	2.24518	0.0286755	0.528271	-3.64778
PHTF2	0.366906	0.0369026	2.2404	0.0290025	0.531784	-3.65705
YPEL3	0.3504	0.0823807	2.23581	0.0293192	0.535661	-3.66592
HAND2	0.30439	0.014429	2.23563	0.0293317	0.535661	-3.66626
PLPP1	0.320013	-0.0459435	2.23416	0.0294343	0.536429	-3.66912
TTN	0.393625	-0.135724	2.2339	0.0294523	0.536429	-3.66962
IL20RB	0.317514	0.00157684	2.23328	0.0294951	0.536545	-3.6708
PGM5-AS1	0.23853	0.0251261	2.23255	0.0295462	0.536545	-3.67221
OR8G1	0.272124	0.00196555	2.231	0.0296551	0.536545	-3.67522
LRRK2	0.289008	-0.0229169	2.23083	0.029667	0.536545	-3.67554
RBMS3-AS1	0.252922	-0.00188053	2.23006	0.0297205	0.536545	-3.67701
SLC23A2	0.2615	-0.0421982	2.23001	0.0297243	0.536545	-3.67712
ATP6V1E1	0.339664	0.0416625	2.22952	0.029759	0.536545	-3.67807
GPR171	0.256233	-0.069881	2.22948	0.0297617	0.536545	-3.67815
GNAO1	0.323699	0.00526044	2.22925	0.0297777	0.536545	-3.67858
ZNF32-AS2	0.23323	0.0575711	2.22916	0.0297843	0.536545	-3.67877
KYNU	0.347958	-0.00102896	2.22895	0.0297986	0.536545	-3.67916
OPCML-IT1	0.235534	0.00241398	2.22792	0.0298717	0.536904	-3.68115
GORAB	0.354873	0.0629856	2.22741	0.0299077	0.537198	-3.68214
DLEC1	0.516642	-0.114003	2.22513	0.0300692	0.538589	-3.68653
JUND	0.304799	-0.0666371	2.22463	0.0301045	0.538589	-3.68749
PIP4K2A	0.391549	0.00778182	2.22457	0.0301086	0.538589	-3.6876
EVA1C	0.315799	0.0313956	2.22399	0.0301503	0.538589	-3.68873
USP9YP30	0.257618	0.0368924	2.22234	0.0302677	0.539757	-3.6919
SLC25A30	0.332174	0.0319847	2.22123	0.0303472	0.539765	-3.69404
RASSF8-AS1	0.30425	0.0540867	2.21962	0.0304619	0.540132	-3.69711
UBTFL9	0.209808	-0.0220771	2.21722	0.0306349	0.540132	-3.70173
TCEAL7	0.229718	0.000628999	2.21669	0.0306731	0.540132	-3.70275
KIF26B	0.457161	0.196385	2.21384	0.0308801	0.541857	-3.70823
IGKV1D-42	0.406233	-0.0846166	2.21363	0.0308949	0.541857	-3.70862
ACTG1P17	0.230631	0.0318855	2.21315	0.0309301	0.542012	-3.70955
TRIB2	0.324639	0.0734841	2.21146	0.0310534	0.54302	-3.71279
GCNT7	0.21962	-0.0144676	2.21098	0.031088	0.54302	-3.7137
MS4A7	0.402306	-0.0881252	2.20957	0.0311915	0.54302	-3.7164
TIMM17BP1	0.211748	-0.0229622	2.20925	0.0312149	0.54302	-3.71701
SS18L2P1	0.280919	0.0282346	2.20909	0.0312264	0.54302	-3.71731
SNORA11	0.39693	0.0510841	2.20755	0.0313399	0.544323	-3.72027
CHSY1	0.384023	0.0377512	2.20726	0.0313611	0.544323	-3.72082
PLK3	0.251965	0.0329463	2.20644	0.0314212	0.544352	-3.72238
BEX1	0.232129	-0.0393946	2.20643	0.0314226	0.544352	-3.72241
AK5	0.29828	0.0359994	2.20321	0.0316607	0.544874	-3.72856
ANKRD20A10P	0.256181	-0.0440572	2.2028	0.0316909	0.544874	-3.72934
EDARADD	0.304083	-0.00955598	2.20262	0.0317049	0.544874	-3.7297
ANXA5	0.494102	0.148199	2.1985	0.0320123	0.547618	-3.73755
OR2T7	0.279985	0.0168085	2.19731	0.0321012	0.54778	-3.73981
IGHV2OR16-5	0.253898	-0.0032959	2.19703	0.032123	0.54778	-3.74036
IGLV1-40	0.449378	-0.0182482	2.19695	0.0321283	0.54778	-3.74049
SCRG1	0.418988	-0.133581	2.1966	0.0321548	0.54778	-3.74116
CCDC102B	0.391281	0.042199	2.19591	0.0322067	0.54778	-3.74247
KRT8P6	0.225213	0.00661162	2.1939	0.0323587	0.549073	-3.74631
PCAT1	0.198458	-0.0310637	2.19354	0.0323859	0.549193	-3.74699
CCM2	0.347577	-0.0177377	2.19303	0.0324251	0.549218	-3.74797
HIVEP1	0.376394	-0.0152725	2.19226	0.0324833	0.549218	-3.74943
SEC61A1	0.289425	0.0488853	2.19212	0.0324942	0.549218	-3.7497
KCNJ1	0.220957	-0.03353	2.19189	0.0325114	0.549218	-3.75013
SPATA31D3	0.209418	-0.00399766	2.19167	0.0325282	0.549218	-3.75056
DUSP10	0.411693	0.0725103	2.18893	0.0327373	0.550365	-3.75576
GOLGA8R	0.242185	-0.0350516	2.18844	0.0327747	0.550655	-3.75669
CDKL5	0.244796	0.00461587	2.18751	0.0328461	0.551113	-3.75846
UBE2Q2L	0.263843	-0.00176293	2.1853	0.0330155	0.551886	-3.76264
NUDT9P1	0.228279	0.0353093	2.18331	0.0331696	0.551964	-3.76643
ROBO1	0.423815	0.116491	2.18275	0.0332128	0.551964	-3.76748
TRANK1	0.318392	-0.0298087	2.18193	0.0332763	0.551964	-3.76904
PLK2	0.450207	-0.0419033	2.1814	0.0333176	0.551964	-3.77004
MT2A	0.430211	-0.112267	2.18032	0.0334016	0.552351	-3.77209
TSPY21P	0.228679	0.025611	2.17994	0.0334314	0.55241	-3.77281
ARHGEF6	0.285562	0.00186868	2.17871	0.0335271	0.552563	-3.77513
STX8	0.437492	-0.00338475	2.17841	0.0335504	0.552563	-3.7757
FGF10	0.209649	-0.0587671	2.17769	0.0336065	0.552563	-3.77706
FAM114A1	0.225013	-0.104599	2.17706	0.0336562	0.552563	-3.77825
UNC5C	0.304942	-0.0285876	2.17674	0.0336815	0.552563	-3.77887
RHOQ	0.415181	0.0906803	2.17179	0.0340715	0.553703	-3.78821
PSMD6-AS2	0.292538	-0.00955004	2.17152	0.0340929	0.55372	-3.78872
ZNF415P1	0.233218	0.0385379	2.17084	0.0341468	0.553908	-3.79
GOLGA6L3	0.228507	-0.0259429	2.17061	0.0341653	0.553908	-3.79044
PLXNA1	0.229806	0.0309019	2.16954	0.03425	0.554355	-3.79245
CSRP1	0.395078	0.06794	2.16924	0.0342741	0.554355	-3.79302
MYO16-AS2	0.231757	-0.00623045	2.16653	0.0344901	0.557188	-3.79812
CST5	0.210286	-0.00928053	2.1645	0.0346531	0.558756	-3.80194
SCUBE2	0.320603	-0.0271499	2.16329	0.0347508	0.558908	-3.80423
SNORD93	0.814467	0.0961264	2.16236	0.0348256	0.558908	-3.80597
IGHV1-12	0.291488	-0.0258344	2.16197	0.0348573	0.558908	-3.80671
SNORD114-23	0.231844	-0.0693012	2.1618	0.0348712	0.558908	-3.80703
RBMS1	0.420682	0.129779	2.16133	0.0349092	0.558908	-3.80791
BACE1	0.287433	-0.0194423	2.16043	0.0349823	0.558908	-3.80961
ZFHX4	0.29731	0.0277053	2.15814	0.0351682	0.559535	-3.81391
ZHX2	0.351952	0.0558504	2.1565	0.0353017	0.560352	-3.81697
MAGEL2	0.273977	0.0407894	2.15081	0.0357696	0.565627	-3.82764
CD109	0.329975	-0.0595673	2.15028	0.0358135	0.565627	-3.82864
SPDYE5	0.21783	-0.0787395	2.14712	0.0360754	0.568011	-3.83454
OR2I1P	0.274407	0.0417503	2.14683	0.0361001	0.568072	-3.83509
SEL1L	0.366897	0.0038761	2.14616	0.0361561	0.568625	-3.83634
USP3-AS1	0.218118	-0.0359929	2.1456	0.0362025	0.568828	-3.83738
AFF3	0.458505	-0.241049	2.14335	0.0363909	0.571	-3.84158
WDR44	0.331312	0.067588	2.14247	0.0364644	0.571499	-3.84322
MFAP4	0.351027	-0.0930797	2.14139	0.0365554	0.572268	-3.84523
HSPA8P4	0.229281	-0.0251624	2.13979	0.0366907	0.5734	-3.84822
CYTIP	0.379683	-0.114243	2.13781	0.0368583	0.575361	-3.85191
IGKV3-11	0.617509	-0.00846226	2.13636	0.036982	0.575974	-3.85462
CUEDC1	0.1862	0.0556379	2.13526	0.0370756	0.576492	-3.85666
TRIM64DP	0.221302	-0.0341803	2.1347	0.0371229	0.576524	-3.85769
TRIM45	0.283145	-0.00233756	2.13359	0.0372178	0.576652	-3.85976
MTCO1P51	0.244716	0.00547354	2.13178	0.0373735	0.576807	-3.86313
IGKV3D-7	0.437937	-0.0872028	2.1313	0.0374149	0.576983	-3.86403
OR8J3	0.186203	-0.0186431	2.13055	0.0374787	0.577452	-3.8654
VSIG4	0.414899	-0.125664	2.12791	0.0377072	0.578207	-3.87031
PJA2	0.349994	0.0264316	2.12778	0.0377184	0.578207	-3.87055
TCEA1P3	0.249001	0.0165598	2.12719	0.0377695	0.578666	-3.87165
RRP7A	0.302013	0.0487488	2.12593	0.0378784	0.579684	-3.87398
MAF	0.417456	-0.0729278	2.12361	0.0380811	0.580466	-3.87828
DACT1	0.28842	0.104986	2.12316	0.0381206	0.580466	-3.87912
SNORD114-19	0.349476	0.0015165	2.12129	0.0382842	0.580743	-3.88258
NBEAP1	0.535116	-0.146139	2.12125	0.038288	0.580743	-3.88266
PARVA	0.285633	0.0324765	2.12065	0.0383402	0.581018	-3.88376
MGARP	0.295005	-0.0523271	2.11805	0.0385695	0.581045	-3.88857
ANKRD6	0.365367	0.0289711	2.11784	0.038588	0.581045	-3.88896
HMGB3P14	0.260425	-0.0342804	2.11753	0.0386148	0.581045	-3.88952
MYADM	0.340013	0.0311898	2.11736	0.0386299	0.581045	-3.88984
CLIC4P3	0.252365	0.0364068	2.11453	0.0388814	0.581045	-3.89507
MRAS	0.408303	0.0189442	2.11446	0.0388876	0.581045	-3.8952
ENDOU	0.192231	-0.0457802	2.11292	0.0390245	0.581045	-3.89804
BBS9	0.441765	0.0398809	2.11215	0.0390934	0.581045	-3.89946
CBLB	0.36607	0.000144324	2.11131	0.0391688	0.581045	-3.90101
MEF2D	0.256875	0.0648065	2.11106	0.039191	0.581045	-3.90147
ST7-AS2	0.210747	-0.00261049	2.11102	0.0391945	0.581045	-3.90154
LRRC4C	0.308104	0.0112609	2.11062	0.0392298	0.581045	-3.90227
GADD45B	0.226522	0.0748957	2.11055	0.0392364	0.581045	-3.9024
PSMC1P4	0.227441	0.0668349	2.10812	0.039455	0.583676	-3.90688
HCG4B	0.280934	-0.0219247	2.10694	0.0395612	0.584786	-3.90905
MRPL22P1	0.260658	-0.00241755	2.10593	0.0396528	0.585506	-3.91092
GBP1P1	0.554067	0.0816266	2.10495	0.0397408	0.585855	-3.9127
TBX2-AS1	0.212284	0.0505766	2.10349	0.0398733	0.586391	-3.91539
RASSF8	0.250453	0.000875869	2.10272	0.0399435	0.586391	-3.9168
SRGAP2	0.316108	-0.00185576	2.1024	0.0399732	0.586391	-3.9174
NUMBL	0.194355	-0.00591013	2.10172	0.0400349	0.586391	-3.91865
POLK	0.416334	0.0793128	2.09983	0.0402078	0.586528	-3.92212
CORO2B	0.291138	-0.0357234	2.09914	0.0402713	0.586528	-3.92339
RASA3	0.352139	0.00551062	2.09861	0.040319	0.586528	-3.92434
IGHVIII-25-1	0.234079	-0.0286245	2.09833	0.040345	0.586528	-3.92486
HECTD2-AS1	0.22538	0.0475525	2.09695	0.0404721	0.587654	-3.92739
TLE6	0.252855	-0.0267413	2.09679	0.0404871	0.587654	-3.92769
GNG2	0.402872	-0.14025	2.09522	0.0406317	0.588048	-3.93056
NEFL	0.273755	0.00615206	2.09283	0.0408532	0.589209	-3.93494
CSNK1E	0.21846	0.0350539	2.09209	0.0409216	0.589885	-3.93629
CPQ	0.420419	-0.101376	2.09109	0.0410149	0.590184	-3.93812
FHOD3	0.322891	-0.108142	2.09094	0.0410289	0.590184	-3.93839
TREML5P	0.261204	0.000321614	2.09042	0.0410769	0.590565	-3.93934
NRIP1	0.333313	0.0560574	2.09015	0.0411028	0.590626	-3.93984
TP53BP2	0.244214	0.0233714	2.08956	0.0411576	0.591084	-3.94091
MCEMP1	0.275296	-0.00574487	2.08806	0.0412981	0.591639	-3.94366
CASKIN2	0.210145	0.0533729	2.088	0.0413033	0.591639	-3.94376
TPMTP2	0.240894	-0.0471725	2.08749	0.0413513	0.591705	-3.94469
TBKBP1	0.275141	-0.0373248	2.08662	0.0414328	0.592561	-3.94628
ULK3	0.312642	-0.0483583	2.08552	0.0415361	0.593417	-3.94828
TTC14	0.329002	0.0101537	2.08482	0.0416021	0.593482	-3.94956
IGHV1OR16-3	0.238597	-0.0184689	2.08428	0.041654	0.593482	-3.95056
STEAP3	0.233816	0.0539917	2.08417	0.041664	0.593482	-3.95075
PDLIM7	0.190733	0.0565264	2.08409	0.0416711	0.593482	-3.95089
IGHV1OR15-3	0.259393	-0.0264394	2.08339	0.0417375	0.593482	-3.95217
CRTC3	0.300877	0.00141635	2.08253	0.0418192	0.593482	-3.95374
IGF1	0.251714	-0.0290304	2.08028	0.0420325	0.594513	-3.95783
HUS1B	0.258052	-0.0781504	2.08024	0.0420365	0.594513	-3.95791
LHPP	0.324141	-0.0708545	2.07497	0.0425408	0.597387	-3.96749
CD163	0.522217	-0.00986623	2.07099	0.0429249	0.599177	-3.97471
RPL17P19	0.219703	-0.0546205	2.07042	0.0429802	0.599309	-3.97574
ALPK3	0.294914	0.0498313	2.06864	0.0431533	0.600214	-3.97897
AFF2-IT1	0.298542	-0.0235044	2.06861	0.0431556	0.600214	-3.97901
SIT1	0.213557	0.0227564	2.06689	0.0433237	0.601334	-3.98213
NAP1L4P1	0.21065	0.0305717	2.06262	0.0437426	0.605803	-3.98986
CEP170P1	0.296675	0.025725	2.0622	0.0437844	0.605803	-3.99062
CCL21	0.331585	-0.0233719	2.06188	0.0438162	0.605803	-3.9912
LRRC46	0.204937	-0.03886	2.06185	0.0438185	0.605803	-3.99125
CPA4	0.204181	-0.0137611	2.06088	0.0439142	0.605803	-3.993
RASSF4	0.34333	0.0400709	2.06048	0.0439542	0.605803	-3.99373
KRT17	0.207467	-0.0252527	2.05874	0.0441263	0.605803	-3.99686
FMO4	0.257065	-0.00577757	2.0574	0.0442593	0.605803	-3.99927
IRX1P1	0.253295	-0.00895808	2.05605	0.0443944	0.607243	-4.00172
CCNB3P1	0.254884	-0.0307987	2.05554	0.044445	0.607414	-4.00263
OTP	0.327444	-0.0260459	2.05548	0.0444514	0.607414	-4.00275
ZNF969P	0.227798	-0.0454524	2.05434	0.0445656	0.60812	-4.0048
IGKV1D-22	0.325664	-0.0672501	2.05406	0.0445933	0.60812	-4.0053
RARB	0.254452	0.0440909	2.053	0.044699	0.608414	-4.0072
VN1R87P	0.255328	-0.0348837	2.05205	0.0447947	0.608414	-4.00891
ACKR1	0.293625	-0.115299	2.05185	0.044815	0.608414	-4.00927
ZNF33CP	0.192794	-0.0422756	2.05182	0.0448176	0.608414	-4.00932
RBMY2JP	0.2908	-0.00295247	2.05142	0.0448583	0.608414	-4.01005
THOC7-AS1	0.279205	0.0287586	2.04951	0.0450511	0.608414	-4.01349
PTTG1IP	0.268293	0.0729797	2.04943	0.0450595	0.608414	-4.01363
GPR107	0.28896	-0.0245342	2.04941	0.045061	0.608414	-4.01366
TCIRG1	0.321523	0.00788066	2.04925	0.0450777	0.608414	-4.01396
SKOR2	0.180303	-0.0906036	2.04922	0.0450799	0.608414	-4.014
TNFAIP3	0.432304	0.0833348	2.04922	0.0450805	0.608414	-4.01401
OR4K5	0.212068	-0.0510814	2.04659	0.0453464	0.610205	-4.01872
LAMB2P1	0.25815	0.0749714	2.04609	0.0453978	0.610205	-4.01963
SYDE1	0.256177	-0.00845418	2.04573	0.0454349	0.610205	-4.02028
RAB23	0.360671	0.0135933	2.04473	0.0455368	0.610205	-4.02207
ANKRD44	0.360311	-0.041316	2.04393	0.0456183	0.610205	-4.0235
RPS6KC1	0.206884	0.00348481	2.04338	0.0456738	0.610205	-4.02448
SNORD114-24	0.166193	-0.0503268	2.04326	0.0456864	0.610205	-4.0247
CFAP73	0.200875	0.00540127	2.04298	0.0457152	0.610205	-4.0252
ANGEL1	0.220987	0.0655112	2.04268	0.0457458	0.610205	-4.02574
ZNF333	0.224998	-0.0420788	2.04227	0.0457878	0.610205	-4.02647
C8orf48	0.286615	0.0536388	2.04207	0.0458078	0.610205	-4.02682
ARL2BPP4	0.249358	0.0143115	2.04133	0.0458837	0.610784	-4.02815
TSSK4	0.187463	-0.0101153	2.04076	0.0459424	0.610969	-4.02917
RNGTTP1	0.264926	-0.0272707	2.03928	0.0460949	0.611508	-4.03182
RHOBTB1	0.28074	0.0702861	2.03868	0.0461569	0.61177	-4.0329
RARG	0.339823	0.043651	2.03866	0.0461595	0.61177	-4.03294
UCP2	0.44291	-0.0707962	2.03834	0.0461923	0.611896	-4.03351
RUNX2	0.274571	0.100399	2.03808	0.046219	0.611896	-4.03397
RGN	0.240167	0.0238186	2.03664	0.0463685	0.611896	-4.03656
AMY1A	0.200716	-0.0670962	2.03646	0.0463867	0.611896	-4.03687
CCL2	0.322712	0.0511355	2.03621	0.0464126	0.611896	-4.03732
ZDHHC15	0.376715	-0.0867756	2.0353	0.0465072	0.611896	-4.03895
TXNRD3	0.30385	0.0872735	2.03489	0.04655	0.611896	-4.03968
ARL4D	0.245296	-0.0302244	2.03228	0.0468218	0.612848	-4.04434
BST2	0.574533	-0.0729824	2.03206	0.0468446	0.612848	-4.04473
ELMO2	0.294755	-0.0924933	2.03109	0.0469458	0.613069	-4.04645
DOCK11	0.403287	-0.0313517	2.03011	0.0470488	0.613268	-4.0482
SNRK	0.318801	-0.0914894	2.0297	0.047092	0.613268	-4.04894
MTCO2P4	0.178109	-0.0339306	2.02874	0.0471932	0.613268	-4.05065
RSAD2	0.245073	0.0124846	2.02822	0.047248	0.613516	-4.05158
SEMA7A	0.227985	-0.01268	2.02784	0.0472876	0.613516	-4.05225
SCUBE3	0.353197	0.0967042	2.02666	0.0474124	0.613516	-4.05436
ZEB2	0.234618	-0.0241028	2.02662	0.0474164	0.613516	-4.05442
ARHGEF26	0.241812	-0.00971146	2.02601	0.0474805	0.613785	-4.0555
HIGD1AP8	0.185371	0.00449091	2.02578	0.047505	0.61381	-4.05591
SNORD114-1	0.258843	-0.00674758	2.02462	0.0476283	0.613816	-4.05799
MORC1	0.213359	-0.0151578	2.02305	0.0477944	0.613816	-4.06076
ABI3BP	0.595722	-0.242069	2.02272	0.0478298	0.613816	-4.06136
NCF1B	0.309387	-0.0818162	2.02252	0.0478506	0.613816	-4.0617
FMO2	0.257254	0.0173531	2.0221	0.0478959	0.613816	-4.06246
RAPGEF3	0.265677	-0.0955737	2.02146	0.0479639	0.613816	-4.06359
PTGS1	0.265719	-0.0349377	2.02143	0.0479669	0.613816	-4.06364
TBX5-AS1	0.200395	0.0167268	2.02087	0.0480272	0.613816	-4.06464
CRISPLD2	0.270004	0.0214913	2.02067	0.0480485	0.613816	-4.065
PLXNC1	0.428302	0.0124884	2.02059	0.0480571	0.613816	-4.06514
RBMY2EP	0.203722	-0.0297754	2.0202	0.0480991	0.613816	-4.06584
HTRA3	0.227976	-0.00702042	2.01898	0.0482289	0.613816	-4.06799
NLRC4	0.25351	0.035605	2.01896	0.0482315	0.613816	-4.06803
RBMY2HP	0.23869	-0.0121723	2.01765	0.0483718	0.613816	-4.07035
IGHV1-45	0.275767	-0.0316634	2.01764	0.0483732	0.613816	-4.07037
VCAM1	0.267824	-0.0145329	2.01705	0.0484364	0.613816	-4.07142
NTF6B	0.191975	0.019807	2.01698	0.0484443	0.613816	-4.07155
TRIO	0.246534	0.0471931	2.01659	0.048486	0.613816	-4.07223
RBBP8P1	0.229007	-0.0491087	2.01571	0.0485811	0.613816	-4.0738
SLC13A5	0.224361	-0.0181636	2.01561	0.0485919	0.613816	-4.07397
SAMD9	0.369201	-0.0688138	2.01555	0.0485987	0.613816	-4.07409
GJB2	0.423111	0.164261	2.01496	0.0486614	0.613816	-4.07512
HNRNPA1P9	0.188455	0.0122773	2.01484	0.0486745	0.613816	-4.07533
KCNE4	0.29311	0.0102309	2.01429	0.0487341	0.614266	-4.07631
INHBB	0.227427	0.0419032	2.01263	0.0489144	0.615002	-4.07925
BNIP3L	0.360599	0.043786	2.01235	0.048944	0.615002	-4.07973
MRC2	0.266845	0.00764835	2.01216	0.0489653	0.615002	-4.08008
TBC1D9	0.326994	-0.0534422	2.0119	0.0489938	0.615002	-4.08055
HCK	0.255566	0.0700706	2.0092	0.0492878	0.617273	-4.08532
RPS3AP52	0.247603	0.026828	2.00737	0.0494873	0.618122	-4.08854
ADGRL4	0.37283	-0.0452626	2.00695	0.0495337	0.618122	-4.08928
PLEKHO1	0.245136	-0.0173779	2.00548	0.0496949	0.618965	-4.09187
LPP-AS1	0.224089	-0.061305	2.00501	0.0497473	0.619052	-4.09271
SALL4P7	0.252178	0.0105109	2.00414	0.0498427	0.619268	-4.09424
GOLGA6L5P	0.264267	0.0273124	2.00287	0.0499833	0.619751	-4.09648
SNX29	0.23635	0.0185268	2.00268	0.0500044	0.619751	-4.09682
ZBTB46-AS1	0.158326	-0.0335011	2.00259	0.0500142	0.619751	-4.09698
METTL15P3	0.227981	-0.00862712	2.00244	0.0500304	0.619751	-4.09724
FCF1P3	0.198986	-0.0156094	2.00197	0.0500827	0.619836	-4.09807
SLC38A7	0.229628	0.0503938	2.00139	0.0501466	0.620346	-4.09908
RMDN2	0.234662	-0.156967	1.99939	0.0503686	0.621631	-4.1026
IGKV1OR1-1	0.314212	-0.0368355	1.99809	0.0505136	0.621631	-4.10489
SLED1	0.275597	0.0468214	1.9979	0.0505349	0.621631	-4.10523
PAM	0.437265	0.06955	1.99767	0.0505608	0.621631	-4.10563
TOP1P1	0.234462	-0.0729665	1.99644	0.0506977	0.621631	-4.10779
SEMA5A	0.419811	-0.0749124	1.99637	0.0507059	0.621631	-4.10792
RASAL2-AS1	0.226147	-0.00686304	1.99626	0.0507189	0.621631	-4.10812
HK3	0.195875	-0.00796206	1.99546	0.0508075	0.621631	-4.10951
IL1R1	0.305307	-0.0205238	1.99529	0.0508269	0.621631	-4.10981
PEA15	0.325745	0.127024	1.99506	0.0508533	0.621631	-4.11023
PTPRJ	0.31011	-0.0386349	1.99466	0.0508976	0.621631	-4.11092
IL6R	0.215401	-0.0530654	1.99409	0.0509621	0.621631	-4.11193
TTLL8	0.260801	0.055859	1.99233	0.0511598	0.621631	-4.11501
COL2A1	0.229081	0.0547611	1.99212	0.0511841	0.621631	-4.11539
RIPK1	0.289381	-0.0722975	1.99155	0.0512481	0.621967	-4.11638
VASH1	0.262696	0.056858	1.99073	0.0513409	0.622121	-4.11782
MCL1	0.284969	-0.0397311	1.99055	0.0513611	0.622121	-4.11813
GALNS	0.287071	0.102974	1.9879	0.0516619	0.624202	-4.12278
TF	0.186186	-0.036891	1.9878	0.0516736	0.624202	-4.12296
RBM24	0.261125	-0.0446486	1.98731	0.0517287	0.624202	-4.12381
ABCA9	0.276443	-0.0600085	1.98729	0.051731	0.624202	-4.12384
GHRHR	0.248176	-0.0393882	1.98714	0.0517486	0.624202	-4.12411
PNPLA3	0.354688	-0.050617	1.98402	0.0521049	0.624731	-4.12957
AFAP1L1	0.231945	0.0459479	1.98205	0.0523303	0.624731	-4.133
IGF1R	0.286211	0.0686509	1.98201	0.0523348	0.624731	-4.13307
NFATC1	0.346996	-0.0688032	1.98175	0.052365	0.624731	-4.13352
DYRK3	0.290982	0.0125425	1.98129	0.0524181	0.624731	-4.13433
HOXA-AS2	0.241725	0.0128221	1.98037	0.0525247	0.624731	-4.13594
SCAMP4	0.268425	0.0228389	1.98015	0.052549	0.624731	-4.13631
BORCS6	0.224904	0.0720622	1.97953	0.0526209	0.624731	-4.1374
DDX43	0.232973	-0.0514004	1.97835	0.0527574	0.624731	-4.13946
C1QB	0.299773	0.0118881	1.9781	0.0527867	0.624731	-4.1399
MTND5P5	0.363906	-0.177534	1.97722	0.0528882	0.624731	-4.14142
PTH2R	0.300574	-0.113574	1.97636	0.0529888	0.624731	-4.14293
TSHZ3	0.311518	0.000639254	1.97591	0.053041	0.624731	-4.14371
CALU	0.204446	0.0439719	1.97555	0.0530826	0.624951	-4.14434
ASXL3	0.201193	-0.00779179	1.97507	0.0531391	0.625053	-4.14518
DGKB	0.248442	0.00529581	1.97403	0.0532594	0.625145	-4.14698
RAB1B	0.287963	0.0137871	1.97307	0.0533719	0.625414	-4.14865
CEP112	0.22097	-0.0497347	1.97235	0.0534561	0.625548	-4.1499
NOG	0.230672	-0.0289097	1.97216	0.0534783	0.625548	-4.15023
RGS11	0.233984	0.0258096	1.97129	0.0535806	0.625548	-4.15175
PTPRU	0.372192	0.0931706	1.97127	0.0535824	0.625548	-4.15178
KCNA3	0.260252	-0.113106	1.96833	0.0539292	0.627076	-4.15689
MTND2P11	0.258279	-0.00541789	1.96767	0.0540072	0.62737	-4.15804
CLCP2	0.262084	-0.0220529	1.96754	0.0540224	0.62737	-4.15826
RIMKLA	0.206737	0.0034274	1.96714	0.0540697	0.627476	-4.15896
TNS3	0.381473	0.134837	1.96377	0.0544697	0.62997	-4.1648
OSBPL8	0.356305	0.0869537	1.96351	0.0545007	0.62997	-4.16525
ADAMTS6	0.391568	0.0558173	1.96162	0.054726	0.6315	-4.16853
RSU1P3	0.318955	0.00502233	1.96053	0.0548556	0.631607	-4.1704
CRYBG3	0.340707	0.0334893	1.96045	0.0548651	0.631607	-4.17054
SIGLEC28P	0.215843	-0.0136441	1.95939	0.0549932	0.63196	-4.17239
EPHB1	0.274717	0.0708887	1.95894	0.0550471	0.63196	-4.17316
TET1	0.278967	-0.0168602	1.95839	0.0551131	0.63196	-4.17411
EPC2	0.232778	-0.0470124	1.95752	0.055217	0.632886	-4.1756
ADAM20P3	0.231099	-0.0186734	1.95611	0.0553877	0.634044	-4.17805
EIF1B-AS1	0.195634	-0.0144911	1.95364	0.0556865	0.635507	-4.18231
CREB3L2	0.297771	0.0261172	1.95361	0.0556899	0.635507	-4.18236
MTND4LP20	0.17828	-0.071128	1.95351	0.0557017	0.635507	-4.18253
ATG12P2	0.188497	-0.0303196	1.95126	0.055976	0.637216	-4.18641
FBXO42	0.163339	0.0587918	1.95082	0.0560294	0.637216	-4.18717
TINCR	0.204357	-0.0328162	1.95073	0.05604	0.637216	-4.18732
IGLV3-22	0.234237	0.0310901	1.95031	0.056091	0.637216	-4.18804
ASB17	0.22223	-0.000394816	1.95021	0.0561037	0.637216	-4.18822
IDS	0.352129	0.112937	1.94983	0.0561498	0.637216	-4.18887
ITGB6	0.420317	-0.0449305	1.94979	0.0561549	0.637216	-4.18894
SOCS3	0.251655	0.0190272	1.94816	0.0563539	0.637883	-4.19174
EXOC2	0.30789	-0.0298667	1.94645	0.0565647	0.639023	-4.1947
DDN	0.272772	-0.0310695	1.94642	0.0565684	0.639023	-4.19475
FGF13	0.205739	-0.00562843	1.9461	0.0566072	0.639023	-4.19529
FOXP1	0.476263	-0.092932	1.94582	0.0566416	0.639023	-4.19577
KATNAL1	0.247742	0.0272814	1.94582	0.0566419	0.639023	-4.19577
HCG4P3	0.253065	-0.0292674	1.94528	0.056708	0.639315	-4.1967
TUB	0.21546	0.098793	1.94393	0.0568746	0.640334	-4.19902
B3GNT6	0.240847	0.0179974	1.94281	0.0570132	0.640715	-4.20094
SKIL	0.485386	0.0523144	1.94251	0.0570499	0.640715	-4.20145
PDE1A	0.268807	-0.0264797	1.9419	0.0571254	0.641072	-4.2025
FCRL2	0.34763	-0.118094	1.94138	0.0571908	0.641072	-4.2034
TNFSF15	0.28978	-0.00047506	1.94026	0.0573299	0.641072	-4.20532
RFX8	0.219824	-0.0296675	1.93997	0.0573661	0.641072	-4.20582
IGKV3-15	0.440862	-0.0610636	1.93967	0.0574025	0.641072	-4.20632
SGPL1	0.214851	-0.0273982	1.93963	0.0574085	0.641072	-4.2064
SIN3B	0.252688	0.0527097	1.93914	0.0574686	0.641072	-4.20723
PPP2R3A	0.254236	-0.0692921	1.93848	0.0575508	0.641072	-4.20836
KCNC1	0.27657	-0.0139393	1.9375	0.0576729	0.641072	-4.21004
FZD4	0.274668	0.0509165	1.93692	0.0577466	0.641072	-4.21105
RSAD1	0.202108	-0.0338201	1.93657	0.0577901	0.641072	-4.21164
STXBP5	0.307606	-0.091392	1.93633	0.0578204	0.641072	-4.21205
DMXL2	0.359908	-0.0112721	1.93602	0.0578583	0.641072	-4.21257
SLC2A3	0.438112	0.0857284	1.93548	0.0579269	0.641072	-4.21351
PAK3	0.249496	0.0116914	1.93483	0.058008	0.641519	-4.21461
PZP	0.234505	-0.0624659	1.93423	0.0580831	0.64158	-4.21564
ADAT1	0.23485	0.00928839	1.93369	0.0581514	0.64158	-4.21656
USP17L4	0.177703	-0.0151921	1.93347	0.058179	0.64158	-4.21694
LTBP2	0.217604	0.0456008	1.9332	0.0582132	0.64158	-4.2174
IGHV1OR16-4	0.208053	-0.042525	1.9321	0.0583517	0.642128	-4.21928
SLC2A5	0.31714	-0.0690701	1.9317	0.0584017	0.642244	-4.21996
GRIP1	0.264498	-0.0221299	1.93164	0.0584093	0.642244	-4.22006
PSMB8-AS1	0.300656	-0.0133745	1.93025	0.0585859	0.643178	-4.22244
IL6ST	0.362707	-0.0559786	1.93014	0.058599	0.643178	-4.22262
PADI4	0.216701	0.00168398	1.93004	0.0586121	0.643178	-4.22279
FAM87A	0.17178	0.0319551	1.92691	0.0590106	0.644931	-4.22814
NLGN4Y-AS1	0.167721	-0.0168382	1.9267	0.0590364	0.644931	-4.22849
BHLHB9P1	0.20116	-0.0343726	1.92655	0.0590553	0.644931	-4.22874
HNRNPH1P2	0.179629	-0.0419333	1.92542	0.0592005	0.645803	-4.23068
CCS	0.241806	-0.0355741	1.92452	0.0593147	0.646011	-4.2322
MT1X	0.371049	-0.110934	1.92411	0.0593672	0.646011	-4.2329
STAT3	0.292742	-0.040984	1.92346	0.0594514	0.646629	-4.23402
VPS39	0.298356	-0.0546192	1.92312	0.059495	0.646629	-4.23459
RABAC1	0.153861	-0.00514207	1.92283	0.0595324	0.646778	-4.23509
CYP4A44P	0.215623	-0.028349	1.92229	0.0596015	0.647271	-4.236
MPPE1P1	0.219727	-0.0672405	1.92185	0.0596585	0.647632	-4.23676
GPR176	0.261802	-0.0263137	1.92128	0.0597309	0.648161	-4.23771
CNN1	0.491533	-0.0134345	1.91916	0.060005	0.650157	-4.24132
NLRP1	0.196509	-0.05428	1.91912	0.0600101	0.650157	-4.24139
ANGPTL1	0.224095	-0.056895	1.91659	0.0603382	0.651901	-4.24569
PDPN	0.367717	0.0715456	1.9152	0.0605181	0.652811	-4.24803
WDR11	0.28831	-0.0124842	1.91476	0.060576	0.653178	-4.24879
EMILIN2	0.204845	0.000955101	1.91437	0.060626	0.653209	-4.24944
KLF15	0.216622	0.0236942	1.91394	0.0606829	0.653555	-4.25018
KCTD9P3	0.224732	0.0234788	1.91165	0.0609819	0.654857	-4.25405
CYGB	0.213996	0.0367682	1.91141	0.0610131	0.654857	-4.25445
CBL	0.256346	-0.0664694	1.91129	0.0610298	0.654857	-4.25467
ETV1	0.47643	0.21735	1.91116	0.0610459	0.654857	-4.25488
GMIP	0.211063	0.0202016	1.91071	0.0611054	0.65487	-4.25564
TTC39C-AS1	0.214427	-0.033002	1.90877	0.0613608	0.65686	-4.25893
OR1D5	0.219983	0.02026	1.90866	0.0613746	0.65686	-4.2591
SHC1P1	0.219975	0.00803854	1.90822	0.0614331	0.656898	-4.25985
CATSPERB	0.252128	-0.0339935	1.90747	0.0615326	0.656898	-4.26113
DMWD	0.326517	0.00410118	1.90742	0.0615383	0.656898	-4.2612
MAGED1	0.298132	0.0397741	1.90609	0.061715	0.656898	-4.26346
ZNF890P	0.223255	-0.0294056	1.90558	0.0617816	0.656898	-4.26431
HEIH	0.231764	-0.0133487	1.90532	0.0618163	0.656898	-4.26475
CUBNP2	0.214697	-0.00177481	1.90419	0.0619665	0.656898	-4.26666
KRT17P1	0.239017	0.0150958	1.90347	0.062062	0.656898	-4.26787
FOXN3-AS2	0.231887	0.0411411	1.90303	0.0621207	0.656898	-4.26861
HOXB-AS4	0.184002	0.0463769	1.90288	0.062141	0.656898	-4.26887
FAM107B	0.333275	-0.147805	1.90246	0.0621963	0.656898	-4.26957
VN2R9P	0.201588	0.0290428	1.90144	0.0623329	0.657303	-4.27129
CCR4	0.323245	0.00981354	1.90142	0.0623358	0.657303	-4.27133
WHAMMP3	0.286527	0.0125525	1.90079	0.0624198	0.657344	-4.27239
SCML4	0.241014	0.0495485	1.90064	0.0624401	0.657344	-4.27265
PDE4A	0.323604	-0.0177486	1.89956	0.0625839	0.65803	-4.27445
AAK1	0.259163	-0.0780175	1.89676	0.0629599	0.659805	-4.27916
DHX38	0.186727	0.0209709	1.89644	0.0630038	0.659805	-4.27971
KAT8	0.193855	-0.0114947	1.89555	0.0631227	0.660045	-4.28119
FAM204CP	0.191832	-0.017756	1.89423	0.0633017	0.660871	-4.28342
CDH20	0.185975	0.021693	1.89336	0.0634196	0.660871	-4.28488
NR1H2	0.307421	0.00867939	1.88916	0.0639912	0.663005	-4.29193
ACTR3BP3	0.208819	-0.0512236	1.88889	0.0640282	0.663005	-4.29238
MORF4L2	0.213823	0.0794109	1.88814	0.0641294	0.663005	-4.29362
FOXCUT	0.18647	0.0473017	1.88812	0.0641324	0.663005	-4.29366
FBXW11	0.249854	0.0235937	1.888	0.0641488	0.663005	-4.29386
HIVEP2	0.321584	-0.172972	1.88573	0.0644604	0.663005	-4.29766
BCAR3	0.22983	0.00352607	1.88571	0.064463	0.663005	-4.29769
SARDH	0.22182	-0.0307926	1.88556	0.0644834	0.663005	-4.29794
HSPA8P15	0.260617	0.0215897	1.88513	0.0645435	0.663005	-4.29867
ZSCAN26	0.28196	-0.0740748	1.88494	0.0645693	0.663005	-4.29899
CTSL	0.212251	0.00548016	1.88379	0.064727	0.663005	-4.3009
SPIN1	0.309254	-0.00339365	1.88342	0.0647789	0.663005	-4.30153
IGKV1D-35	0.288724	-0.087616	1.883	0.0648361	0.663005	-4.30222
KCCAT198	0.19312	-0.0495866	1.8824	0.064919	0.663005	-4.30322
PEG3-AS1	0.232655	0.036886	1.88236	0.0649254	0.663005	-4.3033
TMEM50B	0.278359	-0.0169707	1.88226	0.064938	0.663005	-4.30345
PPP1R3C	0.21059	0.0268907	1.88226	0.064938	0.663005	-4.30345
TP53INP1	0.338667	-0.0175259	1.88185	0.0649954	0.663005	-4.30415
ZNF542P	0.221942	0.0638164	1.88066	0.0651597	0.663005	-4.30613
WDFY1	0.213358	0.080648	1.88034	0.0652049	0.663005	-4.30667
WWC2-AS2	0.254985	0.00243365	1.8802	0.0652239	0.663005	-4.3069
CYFIP1	0.211012	-0.00113488	1.87968	0.0652958	0.663005	-4.30776
FLJ42969	0.194908	0.0102434	1.87962	0.0653051	0.663005	-4.30787
CNN3P1	0.211657	0.0495329	1.87957	0.0653114	0.663005	-4.30795
CGB7	0.191	0.0167216	1.87869	0.0654333	0.663508	-4.30941
GLI2	0.379291	0.034831	1.8779	0.0655433	0.663508	-4.31073
FPR3	0.393459	0.0929992	1.8779	0.0655439	0.663508	-4.31074
MTND4P18	0.229591	0.0262558	1.87692	0.0656799	0.664151	-4.31236
MAP4K5	0.257296	-0.0314329	1.87595	0.0658163	0.665032	-4.31399
MSC-AS1	0.272972	0.0529211	1.87449	0.0660203	0.665593	-4.31641
CD48	0.279324	-0.0589819	1.8742	0.0660605	0.665593	-4.31689
INPPL1	0.239311	0.0227032	1.87405	0.0660813	0.665593	-4.31714
APC	0.34145	0.0405505	1.8732	0.0662017	0.665868	-4.31856
IGLV1-41	0.284057	-0.115195	1.87309	0.0662161	0.665868	-4.31873
ST3GAL3	0.242212	0.0121187	1.87142	0.0664517	0.667254	-4.32151
TRBV5-3	0.212078	-0.0298885	1.87076	0.0665455	0.667705	-4.32262
GOT2P5	0.217259	-0.00967048	1.87053	0.0665774	0.66778	-4.32299
HTR2B	0.280766	0.0722662	1.86959	0.0667102	0.668529	-4.32455
ARL13A	0.178811	-0.0238154	1.86948	0.0667256	0.668529	-4.32474
OSBP2	0.258779	0.0738971	1.86922	0.0667631	0.668579	-4.32518
THAP9-AS1	0.204244	-0.0199535	1.8691	0.0667795	0.668579	-4.32537
C2orf74	0.246348	-0.0730969	1.86833	0.0668892	0.668722	-4.32665
COMMD4	0.325494	-0.0116817	1.86831	0.0668914	0.668722	-4.32668
CNN2P10	0.193532	0.0457746	1.86744	0.0670143	0.668722	-4.32811
PAF1	0.157439	-0.0215612	1.86689	0.0670932	0.669265	-4.32904
CFI	0.289326	0.0715765	1.86538	0.0673079	0.66954	-4.33154
SNX24	0.415672	-0.0453305	1.86488	0.0673797	0.66954	-4.33237
TRAM2	0.297874	-0.0474333	1.8647	0.0674041	0.66954	-4.33265
PLXDC1	0.336981	-0.0409407	1.86328	0.067607	0.670023	-4.33501
KLHL3	0.267819	-0.0526548	1.86183	0.0678158	0.670814	-4.33742
SNAI3	0.194426	-0.0112643	1.8614	0.0678763	0.670814	-4.33812
PGS1	0.198958	-0.00231745	1.86096	0.0679404	0.670814	-4.33885
CPVL	0.346868	-0.0558414	1.86069	0.0679782	0.670814	-4.33929
MAFF	0.224204	0.00553137	1.86041	0.0680185	0.670814	-4.33975
FADS2	0.502278	0.0337503	1.8603	0.0680347	0.670814	-4.33994
ARHGAP42P1	0.222146	-0.0251897	1.85865	0.0682722	0.672067	-4.34266
FAM193B	0.241931	0.00238915	1.85792	0.068378	0.672329	-4.34387
CDO1	0.230426	0.0572164	1.85657	0.0685736	0.672484	-4.34611
BNIP3P36	0.156189	-0.0847538	1.85472	0.0688408	0.673235	-4.34915
INGX	0.159185	0.00077628	1.85463	0.0688546	0.673235	-4.3493
ZFHX4-AS1	0.220405	0.0493577	1.85446	0.0688793	0.673235	-4.34958
FKBP9P1	0.232222	0.0517159	1.85377	0.0689792	0.673235	-4.35072
TRAJ23	0.27451	-0.048931	1.85336	0.0690396	0.673235	-4.3514
ATXN3	0.220448	0.0939226	1.85321	0.0690602	0.673235	-4.35163
PRYP2	0.262639	-0.0472175	1.85309	0.0690786	0.673235	-4.35184
PRMT2	0.203949	0.120066	1.8524	0.0691785	0.673235	-4.35297
BIN2	0.295211	-0.0252301	1.85236	0.0691842	0.673235	-4.35303
SCARNA10	0.159124	-0.0414505	1.85171	0.0692797	0.673235	-4.35411
SGCZ	0.200703	-0.0318631	1.85159	0.0692977	0.673235	-4.35431
CBX7	0.227968	-0.0344494	1.85129	0.0693414	0.673235	-4.35481
TRBV4-1	0.27375	-0.011271	1.85085	0.0694058	0.673235	-4.35553
AMOTL1	0.259825	-0.025876	1.85052	0.0694539	0.673235	-4.35607
BST1	0.299851	0.00907404	1.85005	0.0695218	0.673235	-4.35684
MORF4L1	0.334323	0.00549347	1.84969	0.0695757	0.673235	-4.35744
ERMAP	0.316882	-0.0864485	1.84943	0.0696131	0.673235	-4.35786
CYP2G1P	0.185918	0.00310571	1.84933	0.0696271	0.673235	-4.35802
AMD1P1	0.208965	0.029531	1.84931	0.0696308	0.673235	-4.35806
OR4C12	0.209889	-0.0351954	1.84902	0.0696726	0.673235	-4.35853
ADCY7	0.218931	0.0101834	1.84861	0.0697327	0.673235	-4.3592
CCDC75P1	0.209311	-0.0331299	1.8482	0.0697943	0.673235	-4.35989
PKD2	0.260457	0.0215862	1.84751	0.069895	0.673448	-4.36101
ATXN1	0.285347	-0.0297269	1.84744	0.0699052	0.673448	-4.36113
FBXL2	0.368278	0.0338679	1.84623	0.0700837	0.673708	-4.36312
GOLGA8A	0.250639	-0.0651546	1.84583	0.0701424	0.673708	-4.36377
TMEM185AP1	0.330306	0.0247288	1.84575	0.0701543	0.673708	-4.36391
CTIF	0.223717	-0.025273	1.84521	0.070234	0.673892	-4.36479
RCN3	0.190031	0.016881	1.84391	0.070427	0.67468	-4.36693
FCGRT	0.222635	-0.0499535	1.8434	0.0705021	0.674912	-4.36776
POU2F2	0.325712	-0.0830852	1.84144	0.0707923	0.676504	-4.37097
EVI2A	0.434774	-0.0431319	1.84074	0.0708967	0.676743	-4.37212
PTPN2P1	0.229883	-0.0102427	1.8399	0.071022	0.677072	-4.37349
MGAT1	0.204203	0.0175784	1.83983	0.071032	0.677072	-4.3736
PCYT1B-AS1	0.230024	-0.0504749	1.83955	0.0710745	0.677072	-4.37407
RBP4	0.306643	0.00120436	1.83934	0.0711051	0.677072	-4.37441
GNAI2	0.381818	-0.0566963	1.83899	0.071158	0.677072	-4.37499
IGLJCOR18	0.244452	0.101817	1.8387	0.0712012	0.677092	-4.37546
XG	0.280882	-0.00997002	1.83598	0.0716091	0.678157	-4.37991
RPS6KB2	0.199784	0.0534456	1.83577	0.0716407	0.678157	-4.38026
CDH6	0.209357	0.0153973	1.83576	0.0716421	0.678157	-4.38027
LL22NC03-63E9.3	0.222962	-0.0408978	1.83563	0.0716608	0.678157	-4.38047
POM121L6P	0.258907	-0.0543194	1.83373	0.0719463	0.679783	-4.38357
ACADVL	0.318655	-0.00488109	1.83219	0.0721798	0.680944	-4.38609
PSORS1C2	0.213207	-0.019293	1.83073	0.0724005	0.682084	-4.38847
POT1-AS1	0.227383	0.0301117	1.82976	0.0725474	0.682524	-4.39005
A2M	0.39164	-0.0603283	1.8279	0.0728305	0.683979	-4.39308
SIGLEC1	0.190589	0.00373443	1.82771	0.0728589	0.683979	-4.39339
CAB39P1	0.249479	-0.0349953	1.82768	0.0728631	0.683979	-4.39343
IGKV1D-32	0.283713	-0.0542471	1.82729	0.0729235	0.683979	-4.39408
ARID5A	0.214954	-0.0135376	1.82721	0.0729347	0.683979	-4.3942
IQCJ	0.261472	0.0329149	1.82665	0.0730204	0.683979	-4.39511
GYG1P3	0.202395	0.0407343	1.82604	0.0731134	0.683979	-4.3961
OR4C16	0.175	-0.0305497	1.82565	0.0731735	0.683979	-4.39674
ENO1P2	0.195115	-0.00780323	1.82505	0.0732647	0.683979	-4.39771
MBD5	0.288808	-0.101033	1.82475	0.0733106	0.683979	-4.3982
BDKRB1	0.330603	-0.0766219	1.82396	0.0734324	0.684283	-4.39949
ZNF546	0.217365	-0.0174121	1.82358	0.0734902	0.684283	-4.4001
PCBP3	0.379926	-0.0505431	1.82348	0.073506	0.684283	-4.40027
CADM1	0.211145	0.0397424	1.82334	0.0735269	0.684283	-4.40049
BEX4	0.275033	-0.0482391	1.82298	0.073583	0.684283	-4.40108
FOSB	0.415516	-0.0247682	1.81891	0.0742096	0.686129	-4.40767
P3H1	0.202633	0.0290078	1.8189	0.0742109	0.686129	-4.40769
ZNF524	0.227677	-0.0110513	1.81886	0.0742184	0.686129	-4.40777
DEFB115	0.239161	0.0072454	1.81885	0.0742187	0.686129	-4.40777
FTLP2	0.335515	0.0333816	1.81876	0.0742339	0.686129	-4.40793
RASGRP1	0.338716	0.0445203	1.81793	0.074362	0.686129	-4.40927
IGKV1OR2-118	0.262177	-0.0280721	1.81785	0.074374	0.686129	-4.40939
KRT84	0.258428	-0.0251898	1.81781	0.0743809	0.686129	-4.40947
MEIS3P1	0.2837	-0.127645	1.81779	0.074384	0.686129	-4.4095
RARRES1	0.554938	-0.0844088	1.81718	0.0744787	0.686328	-4.41049
RASAL2	0.394686	0.119903	1.81681	0.0745356	0.686328	-4.41108
RPL12P9	0.201904	0.0245351	1.81661	0.0745659	0.686328	-4.4114
MTMR9LP	0.176037	-0.0436978	1.81636	0.074605	0.686328	-4.4118
KIT	0.205394	-0.0516877	1.81629	0.0746167	0.686328	-4.41193
ANK2	0.300067	-0.129635	1.81616	0.0746358	0.686328	-4.41212
IGKV1D-39	0.669413	-0.214346	1.81593	0.0746723	0.686432	-4.4125
TMEM256P1	0.195479	-0.0246817	1.81466	0.0748701	0.686965	-4.41456
BCAS3	0.200766	-0.0196576	1.81452	0.0748923	0.686965	-4.41479
COL4A1	0.222307	0.0228015	1.81294	0.0751385	0.686965	-4.41734
ACTG1P14	0.200408	-0.0305907	1.81256	0.0751981	0.686965	-4.41795
SYCP2L	0.217674	0.0178789	1.81252	0.0752043	0.686965	-4.41802
HEATR5A	0.216438	-0.0469011	1.81243	0.0752177	0.686965	-4.41816
TDGF1P7	0.221004	-0.000414918	1.8122	0.0752541	0.686965	-4.41853
ASB1	0.219597	0.046001	1.81151	0.075362	0.687311	-4.41965
SP140	0.216977	0.0234143	1.81112	0.0754228	0.687393	-4.42027
PIM1	0.260496	0.0921985	1.81104	0.0754351	0.687393	-4.4204
SSMEM1	0.207159	-0.017563	1.81059	0.0755065	0.687393	-4.42113
ZMAT3	0.206422	0.0670322	1.81043	0.0755322	0.687393	-4.4214
ZMYND19P1	0.207509	-0.00608922	1.80844	0.0758447	0.688461	-4.4246
MSLN	0.522984	0.217826	1.8081	0.0758989	0.688461	-4.42516
CDY14P	0.25714	-0.00349282	1.80808	0.0759017	0.688461	-4.42518
HRAS	0.20095	0.038048	1.80709	0.0760568	0.689639	-4.42677
HSFY3P	0.194517	-0.0376422	1.80689	0.0760885	0.689697	-4.42709
CGNL1	0.193329	0.0229386	1.80552	0.0763054	0.690064	-4.4293
SPATA20	0.216414	-0.0724211	1.8049	0.0764039	0.690064	-4.4303
PCCA	0.248432	0.0509025	1.80479	0.0764208	0.690064	-4.43047
WNT16	0.176517	-0.0615644	1.80472	0.0764318	0.690064	-4.43058
TRMT1	0.284131	0.0654591	1.80437	0.0764878	0.690064	-4.43115
NPSR1-AS1	0.205547	-0.00870142	1.80397	0.0765518	0.690064	-4.4318
WNT9A	0.210306	-0.0357496	1.80313	0.0766855	0.690215	-4.43315
ARL5AP4	0.23716	-0.0309261	1.80305	0.0766973	0.690215	-4.43327
IFNA12P	0.242367	0.0895085	1.80251	0.0767837	0.690336	-4.43415
CHRFAM7A	0.275294	0.0269265	1.80246	0.0767911	0.690336	-4.43422
PLPP3	0.364581	-0.0825646	1.80213	0.0768436	0.69058	-4.43475
RPL7P31	0.202417	0.0507095	1.80113	0.0770035	0.69179	-4.43636
FILIP1	0.20013	-0.000990446	1.79923	0.0773067	0.693132	-4.43941
FLJ42627	0.236064	-0.0172567	1.79876	0.0773829	0.693132	-4.44017
FHAD1	0.247535	0.0308608	1.79842	0.0774362	0.693132	-4.44071
B3GALNT1P1	0.197499	0.00769499	1.79833	0.0774512	0.693132	-4.44086
TSPYL5	0.234853	-0.0168589	1.79766	0.0775592	0.693132	-4.44194
PLA2G12AP2	0.207845	0.0176255	1.79608	0.0778129	0.693584	-4.44447
DUSP22	0.168624	-0.00691889	1.79474	0.0780287	0.694179	-4.44661
C3orf36	0.189261	-0.0373189	1.79421	0.0781146	0.694179	-4.44746
GVINP1	0.316177	-0.124383	1.79384	0.0781745	0.694179	-4.44806
RGL3	0.306063	-0.0746132	1.79381	0.0781797	0.694179	-4.44811
ARHGEF7	0.210231	0.0440996	1.79302	0.0783067	0.694179	-4.44936
AIRN	0.216512	0.0197759	1.79263	0.07837	0.694179	-4.44999
ARSB	0.273788	0.0100662	1.792	0.0784715	0.694179	-4.45099
MS4A6E	0.228656	0.044886	1.79172	0.0785178	0.694179	-4.45145
TRNT1	0.202831	0.0305908	1.79163	0.0785327	0.694179	-4.4516
LMO3	0.34249	-0.0181156	1.79133	0.078581	0.694179	-4.45207
ADHFE1	0.301203	-0.112912	1.79072	0.0786791	0.694179	-4.45304
ODF3B	0.229782	0.00974333	1.79003	0.0787915	0.694179	-4.45414
CCDC30	0.228797	-0.0369279	1.78975	0.0788368	0.694179	-4.45459
FAM180A	0.233546	0.0732452	1.78958	0.0788645	0.694179	-4.45486
CLCN2	0.22684	0.00875877	1.7893	0.0789107	0.694179	-4.45531
RPL7P39	0.219065	0.00851758	1.78923	0.0789221	0.694179	-4.45542
CST2	0.338932	0.206121	1.78802	0.0791197	0.694907	-4.45736
PDE4D	0.439442	-0.219351	1.78754	0.0791981	0.694907	-4.45813
ID3	0.242489	-0.0475691	1.78749	0.0792057	0.694907	-4.4582
PIAS3	0.343086	0.0426101	1.78747	0.0792085	0.694907	-4.45823
IL13RA2	0.205319	-0.100749	1.78591	0.079465	0.695886	-4.46073
RFPL4AP3	0.203129	0.0699606	1.78557	0.0795193	0.695886	-4.46126
OSMR-AS1	0.178301	-0.00478862	1.78555	0.0795232	0.695886	-4.46129
IGKV1-12	0.333554	-0.0948257	1.78516	0.0795872	0.695993	-4.46192
ARL2BPP10	0.21797	-0.00634099	1.78382	0.0798072	0.696312	-4.46405
CYB5R3	0.221185	0.0343468	1.78272	0.0799888	0.696312	-4.46581
VMP1	0.295546	-0.0501118	1.78222	0.0800702	0.696312	-4.46659
STOM	0.208818	-0.0101048	1.7819	0.0801229	0.696312	-4.4671
PPP1R18	0.328281	0.00291053	1.78051	0.0803528	0.696663	-4.46932
NPS	0.229446	-0.0442191	1.78012	0.0804173	0.69676	-4.46994
NTM	0.222127	0.0972011	1.77911	0.0805847	0.69676	-4.47154
RPL3P8	0.148113	-0.0446947	1.77809	0.0807536	0.696807	-4.47316
GPC6	0.172215	-0.025106	1.77772	0.0808159	0.696807	-4.47376
SLC12A4	0.230388	0.0532385	1.77682	0.0809646	0.696807	-4.47518
ATXN7	0.279074	-0.0159909	1.77656	0.0810074	0.696807	-4.47559
ITIH5	0.210141	-0.0636964	1.77632	0.0810474	0.696924	-4.47597
APOC1P1	0.44676	0.260233	1.77583	0.0811304	0.6972	-4.47676
CATIP-AS1	0.262815	0.037622	1.7745	0.0813525	0.697671	-4.47887
ITGB1P1	0.321172	0.158661	1.77449	0.081354	0.697671	-4.47888
NBPF12	0.176289	-0.00927635	1.77426	0.0813914	0.697671	-4.47924
LIPK	0.266188	-0.0120196	1.77383	0.0814635	0.697671	-4.47992
TRIM59	0.352363	0.10666	1.7737	0.0814862	0.697671	-4.48014
F13A1	0.253949	-0.142172	1.77367	0.0814912	0.697671	-4.48018
SLC10A1	0.208052	-0.0234514	1.77318	0.0815728	0.697714	-4.48096
PDK4	0.348365	-0.152212	1.77293	0.0816144	0.697729	-4.48135
RBM22P4	0.216073	0.0124375	1.77222	0.0817335	0.698032	-4.48247
USP51	0.17329	-0.0481173	1.77197	0.0817747	0.698032	-4.48286
HACD4	0.410899	-0.0555669	1.77174	0.081814	0.698032	-4.48323
IGKV6D-21	0.322607	-0.0370722	1.77074	0.0819827	0.698032	-4.48482
IGKV2-29	0.367834	-0.114257	1.77004	0.0820997	0.698032	-4.48592
MTND6P6	0.179627	-0.0268504	1.76906	0.0822644	0.698032	-4.48747
EIF4EP4	0.17025	0.0114382	1.76879	0.0823099	0.698032	-4.4879
HMX3	0.210019	0.0222939	1.76859	0.0823443	0.698032	-4.48822
METRN	0.229218	-0.00158803	1.76819	0.0824112	0.698032	-4.48885
RARRES2P10	0.178379	-0.0222971	1.76793	0.0824563	0.698032	-4.48927
SUPT7L	0.204171	0.0277923	1.7678	0.0824767	0.698032	-4.48946
MAGEA8-AS1	0.218526	-0.0703681	1.76774	0.0824883	0.698032	-4.48957
ZNF385D	0.228715	-0.0307412	1.76668	0.0826665	0.698032	-4.49123
PLTP	0.337068	-0.0571714	1.76665	0.0826727	0.698032	-4.49129
FNDC1	0.243254	0.0355727	1.76585	0.0828069	0.698032	-4.49254
ATP6AP2	0.235367	0.0149766	1.76558	0.0828535	0.698032	-4.49297
HPGDS	0.246574	-0.134363	1.76539	0.0828861	0.698032	-4.49328
CLEC18C	0.166114	0.00144832	1.76526	0.0829082	0.698032	-4.49348
NGB	0.249517	-0.0187331	1.76519	0.0829188	0.698032	-4.49358
DAPK3	0.177925	-0.0221737	1.76471	0.0830017	0.698032	-4.49435
INTS4	0.273936	-0.0545389	1.76467	0.0830081	0.698032	-4.49441
PYHIN5P	0.265167	-0.056307	1.76347	0.0832121	0.698032	-4.4963
LTC4S	0.253328	0.0312171	1.76329	0.083242	0.698032	-4.49658
HMGN2P18	0.188589	-0.032407	1.76302	0.0832892	0.698032	-4.49702
DMRTC2	0.186582	0.0388047	1.76279	0.0833275	0.698032	-4.49737
PTGER3	0.229074	0.0396194	1.76202	0.0834581	0.698429	-4.49858
KLF3-AS1	0.318535	0.118569	1.7618	0.083496	0.698429	-4.49893
IGKV3D-20	0.409013	-0.101021	1.76061	0.0837003	0.699261	-4.50081
STT3A-AS1	0.180689	0.039918	1.76038	0.083739	0.699261	-4.50116
KLHL24	0.216978	0.0823072	1.76016	0.0837771	0.699261	-4.50152
SOCS5	0.324461	0.0332495	1.75993	0.0838163	0.699374	-4.50188
RWDD3	0.196884	0.0137636	1.7596	0.0838724	0.699587	-4.50239
KLRD1	0.224429	-0.0167744	1.75916	0.0839489	0.699587	-4.50309
HSFY6P	0.222858	0.0793014	1.75895	0.0839842	0.699587	-4.50342
KIAA1549L	0.208315	-0.0248174	1.7564	0.0844218	0.701279	-4.50742
OR7E157P	0.177919	-0.041098	1.75563	0.0845545	0.701887	-4.50863
IGKV1D-37	0.296583	-0.0643221	1.75509	0.0846478	0.702263	-4.50948
LIMS2	0.230268	0.0251833	1.75359	0.084908	0.703325	-4.51184
ATG9A	0.272564	0.0485079	1.75285	0.0850359	0.703985	-4.513
SLC9A7P1	0.221415	0.0245941	1.75259	0.0850805	0.704113	-4.5134
OR5B10P	0.20877	0.0209019	1.75175	0.0852263	0.704604	-4.51472
OR52E8	0.182158	-0.0375404	1.75173	0.085231	0.704604	-4.51476
HIF3A	0.226196	0.000772196	1.75079	0.0853927	0.704631	-4.51622
BBX	0.244995	-0.0296174	1.75056	0.085433	0.704631	-4.51658
STAT4	0.187974	-0.0327462	1.75051	0.0854429	0.704631	-4.51667
CD53	0.431415	-0.0627431	1.75045	0.0854529	0.704631	-4.51676
S100A11P1	0.201715	0.109768	1.75002	0.0855274	0.705033	-4.51743
GAL3ST4	0.181178	0.0390873	1.74903	0.0856996	0.705341	-4.51898
GRAMD1A	0.283837	-0.0312997	1.74836	0.0858176	0.705508	-4.52003
SMARCC2	0.288198	-0.0132505	1.74743	0.0859799	0.705696	-4.52149
OR4F17	0.193354	-0.0506561	1.74716	0.086026	0.705696	-4.5219
VSX2	0.134118	0.059033	1.74692	0.086069	0.705696	-4.52228
PPP1R12BP2	0.213883	0.00895635	1.7466	0.0861248	0.705696	-4.52278
DNHD1	0.214927	-0.00185254	1.74599	0.086232	0.705939	-4.52374
KCTD9P6	0.202689	-0.0157739	1.74581	0.0862639	0.705988	-4.52402
CD59	0.396317	0.057169	1.74527	0.086358	0.706546	-4.52486
CACNA1C-IT1	0.202273	-0.0539485	1.74498	0.086409	0.706555	-4.52531
ELFN2	0.198786	0.0390448	1.74462	0.0864727	0.706638	-4.52588
DPY19L2P5	0.184479	0.0112217	1.74348	0.0866735	0.706808	-4.52766
ENOX1-AS1	0.211685	0.0377897	1.74311	0.0867386	0.706808	-4.52824
SRGAP3	0.261431	0.0252642	1.74295	0.0867669	0.706808	-4.52849
NEURL3	0.218962	0.0148425	1.74225	0.0868894	0.706808	-4.52957
OTOS	0.189305	0.0316321	1.74213	0.0869109	0.706808	-4.52976
KLHL5	0.294318	-0.0438532	1.74174	0.0869803	0.706808	-4.53038
THRB-AS1	0.189242	-0.0463468	1.74167	0.0869914	0.706808	-4.53047
TSR1	0.146028	0.0129185	1.74141	0.0870376	0.706808	-4.53088
KRTAP19-7	0.162256	-0.0119448	1.74119	0.0870773	0.706808	-4.53123
VPREB3	0.249749	0.036676	1.74115	0.0870839	0.706808	-4.53129
ERICD	0.202832	-0.0556835	1.7408	0.0871461	0.706808	-4.53184
LAIR1	0.25514	-0.0128735	1.74051	0.0871977	0.706808	-4.53229
ESM1	0.287792	0.156892	1.74039	0.0872183	0.706808	-4.53247
TMEM115	0.195457	0.00924515	1.73961	0.0873569	0.70772	-4.53369
SALL4	0.213087	0.0819282	1.73856	0.0875422	0.708591	-4.53532
TMED9	0.216464	0.024372	1.73759	0.0877153	0.709067	-4.53684
PPP1R2P4	0.211487	0.000116641	1.73738	0.0877522	0.709067	-4.53716
ADGRE1	0.193606	0.0190237	1.73699	0.0878217	0.709067	-4.53777
ZNF570	0.249664	-0.0104656	1.73671	0.0878721	0.709067	-4.53821
TPM1	0.32013	0.00924015	1.73643	0.087921	0.709067	-4.53863
FKBP7	0.290951	0.0674666	1.73452	0.088263	0.710592	-4.54161
LRRC8C	0.278608	-0.0207553	1.73448	0.0882703	0.710592	-4.54167
UBE2Q2P8	0.315565	-0.0349204	1.73411	0.088336	0.710592	-4.54225
UQCRBP1	0.170636	-0.0185921	1.73345	0.088453	0.710658	-4.54326
TMEM158	0.200447	0.0235482	1.73297	0.0885394	0.710886	-4.54401
ARHGEF15	0.235601	0.0111202	1.73289	0.0885548	0.710886	-4.54414
SWT1	0.232047	-0.00831777	1.73162	0.0887817	0.711661	-4.54611
TANC2	0.198264	0.024994	1.73057	0.0889705	0.712756	-4.54773
SNRPN	0.280401	-0.00604147	1.72922	0.089214	0.713288	-4.54983
NANOS1	0.161511	-0.00340679	1.72904	0.0892459	0.713288	-4.5501
KCTD20	0.203502	0.180254	1.72864	0.0893191	0.713511	-4.55073
IGKV1-33	0.604873	-0.0975258	1.72821	0.0893961	0.713511	-4.55139
GOLGA2P11	0.238461	0.00975976	1.72819	0.0893992	0.713511	-4.55142
ADGRD1	0.212236	-0.0309125	1.72809	0.089418	0.713511	-4.55158
NIM1K	0.225196	-0.000981883	1.72769	0.0894898	0.713511	-4.55219
RELL1	0.219306	-0.150094	1.72746	0.0895324	0.713511	-4.55256
ACTR3BP6	0.16582	-0.0319323	1.72707	0.0896023	0.713511	-4.55316
KCNQ1-AS1	0.203301	0.00520921	1.72676	0.0896586	0.713511	-4.55364
TNFRSF17	0.199129	-0.139589	1.72662	0.0896835	0.713511	-4.55385
GLIS2	0.246316	0.0270481	1.72652	0.0897019	0.713511	-4.55401
SARS2	0.15708	0.000843325	1.72576	0.0898398	0.713511	-4.55518
SIGLEC17P	0.167407	-0.0478112	1.72534	0.0899155	0.713626	-4.55583
ST3GAL1	0.371598	-0.0559738	1.72503	0.0899725	0.713663	-4.55632
SCN4A	0.224368	0.0517836	1.72457	0.0900557	0.713663	-4.55702
GRP	0.220755	0.0579032	1.72455	0.0900596	0.713663	-4.55706
CHST1	0.157425	-0.0129581	1.72414	0.0901346	0.713663	-4.55769
MAPK6	0.252238	-0.0260273	1.72413	0.0901366	0.713663	-4.55771
CMTR2	0.325277	0.162027	1.72398	0.0901628	0.713663	-4.55793
ZNF734P	0.16681	0.0163747	1.72388	0.0901815	0.713663	-4.55809
TMEM39B	0.256809	0.0850155	1.72091	0.0907222	0.71481	-4.56267
SCPEP1	0.179579	0.0120456	1.72054	0.0907912	0.71481	-4.56325
CYCSP27	0.189586	0.047021	1.7205	0.0907978	0.71481	-4.56331
SNX19	0.187651	0.0272534	1.7196	0.0909628	0.715284	-4.56469
RPL7P41	0.218084	0.0540965	1.71853	0.0911597	0.71642	-4.56635
PWRN3	0.226342	-0.035081	1.71826	0.0912086	0.716598	-4.56676
ZNF366	0.254401	0.0520127	1.71649	0.0915341	0.717356	-4.56948
ADAM20P2	0.172325	-0.0750617	1.71638	0.091555	0.717356	-4.56966
GPS2P1	0.17362	0.00801318	1.71621	0.0915852	0.717356	-4.56991
HAUS6P2	0.23304	0.0108411	1.71592	0.0916388	0.717356	-4.57036
CCDC85B	0.174598	0.0586806	1.71526	0.0917606	0.717356	-4.57137
VPS26BP1	0.268018	-0.00928439	1.71505	0.0918001	0.717356	-4.5717
ALG9-IT1	0.206099	-0.0113877	1.71499	0.0918109	0.717356	-4.57179
TRAV15	0.189797	0.00123376	1.71488	0.0918316	0.717356	-4.57197
IGHVII-33-1	0.186798	-0.0065568	1.71481	0.0918439	0.717356	-4.57207
MYL12AP1	0.206529	-0.00857735	1.71408	0.0919798	0.717356	-4.5732
WWC1	0.161176	0.0339538	1.71393	0.092006	0.717356	-4.57342
ADGRA2	0.286169	0.0625869	1.71374	0.0920424	0.717356	-4.57372
ULK2	0.180455	0.0235921	1.71346	0.0920934	0.717356	-4.57414
HNRNPA1P61	0.193355	-0.0262731	1.71331	0.0921221	0.717375	-4.57438
IFT80	0.251735	0.0247797	1.71195	0.0923732	0.718255	-4.57646
PRDX2P3	0.219173	0.0354423	1.71146	0.0924642	0.718255	-4.57721
GOLGA8CP	0.158188	-0.0130447	1.71145	0.0924663	0.718255	-4.57723
IGHV4-28	0.332278	0.0293289	1.71068	0.0926089	0.718911	-4.57841
LRRC15	0.218055	0.143505	1.71034	0.0926729	0.719203	-4.57894
PTN	0.219757	-0.103085	1.70972	0.0927886	0.719675	-4.57989
DCD	0.194831	-0.00790247	1.70923	0.0928788	0.719675	-4.58063
TTC28	0.255094	0.0239072	1.70916	0.0928937	0.719675	-4.58075
NPRL3	0.182702	0.00912702	1.70888	0.0929452	0.719679	-4.58118
CYP2C56P	0.202467	-0.0306497	1.70831	0.0930514	0.719744	-4.58205
PPP3R2	0.158735	0.00521986	1.70826	0.0930607	0.719744	-4.58213
IGHG3	0.739771	0.132237	1.70689	0.0933169	0.720139	-4.58422
MTND3P8	0.202467	0.0220031	1.70685	0.0933247	0.720139	-4.58429
RAB3C	0.224419	-0.0421584	1.70685	0.0933249	0.720139	-4.58429
DLC1	0.251107	-0.000580783	1.70659	0.0933738	0.720139	-4.58469
AKIRIN1P2	0.203101	-0.0110034	1.70615	0.0934548	0.720356	-4.58535
PHACTR2-AS1	0.172555	0.0611801	1.70573	0.093534	0.720389	-4.586
OR10J4	0.244172	0.00627755	1.70483	0.0937026	0.720389	-4.58737
MID2	0.271353	-0.022123	1.70427	0.093809	0.720389	-4.58824
OR4F7P	0.26732	-0.0182245	1.70412	0.0938364	0.720389	-4.58846
RPL36AP33	0.27737	0.1098	1.70401	0.0938564	0.720389	-4.58863
FBXL5	0.214049	-0.0458128	1.70392	0.0938739	0.720389	-4.58877
CYYR1	0.300725	-0.0406112	1.70336	0.09398	0.720389	-4.58963
IGKV2-4	0.205903	-0.0633924	1.70312	0.0940238	0.720389	-4.58999
CD83	0.232462	-0.0148548	1.703	0.0940464	0.720389	-4.59017
ZSCAN16-AS1	0.171014	-0.0163608	1.70296	0.0940555	0.720389	-4.59024
RPGRIP1L	0.326584	0.27139	1.70288	0.09407	0.720389	-4.59036
AQP9	0.250734	0.0169163	1.70227	0.0941854	0.720389	-4.5913
CALCOCO1	0.336238	0.0140848	1.7022	0.0941978	0.720389	-4.5914
PER3	0.379014	-0.176293	1.70165	0.0943022	0.720491	-4.59224
MYO1E	0.305212	0.04419	1.70157	0.0943167	0.720491	-4.59236
SNORD114-17	0.267177	-0.0390435	1.69994	0.0946246	0.720978	-4.59484
INPP5F	0.251921	0.0836405	1.69853	0.0948917	0.721042	-4.59699
KDM6B	0.174386	-0.0037033	1.69839	0.0949192	0.721042	-4.59721
ARHGEF17	0.207001	0.0086775	1.69829	0.0949379	0.721042	-4.59736
KRT8P7	0.203188	-0.00927186	1.6976	0.0950686	0.721042	-4.59841
ADGRG2	0.183123	-0.0869371	1.69755	0.0950778	0.721042	-4.59849
IER2	0.277657	-0.0439183	1.69738	0.0951108	0.721042	-4.59875
NME7	0.277659	-0.00834667	1.69726	0.0951334	0.721042	-4.59893
BRD7P6	0.15165	-0.0550799	1.6969	0.0952016	0.721042	-4.59948
HCLS1	0.198394	-0.0539307	1.69662	0.095256	0.721042	-4.59991
RECK	0.228895	0.033446	1.69618	0.0953396	0.721042	-4.60058
RPL7P43	0.207065	0.00697893	1.69584	0.0954034	0.721262	-4.60109
LETM1P2	0.206448	-0.0621505	1.69413	0.0957305	0.721795	-4.6037
DNMT3A	0.232577	0.00210618	1.69377	0.0957984	0.721795	-4.60424
EGFLAM-AS1	0.176707	0.00540661	1.69372	0.0958093	0.721795	-4.60433
CDK17	0.289899	0.0146563	1.69315	0.0959182	0.722018	-4.60519
FTO-IT1	0.210044	-0.0456417	1.69289	0.0959681	0.722194	-4.60559
UNC45A	0.194176	-0.00120632	1.69097	0.0963362	0.722909	-4.6085
ERVMER61-1	0.15475	-0.00615241	1.69042	0.0964416	0.723365	-4.60934
ADAMTS7	0.280257	0.0187437	1.68954	0.0966114	0.723788	-4.61068
TUBB3P2	0.205432	-0.066851	1.68909	0.0966977	0.723788	-4.61136
CASQ2	0.213566	-0.00688707	1.68875	0.0967632	0.723788	-4.61187
PLIN2	0.354926	0.0884417	1.68843	0.0968239	0.724044	-4.61235
ENTPD1-AS1	0.183708	0.0319071	1.68769	0.0969668	0.724368	-4.61347
GAS7	0.252663	0.0686039	1.68766	0.0969732	0.724368	-4.61352
SPATS2	0.31634	0.0326828	1.68598	0.0972985	0.725394	-4.61607
GOLGA8T	0.2045	-0.0508958	1.68578	0.0973379	0.725394	-4.61638
KRTDAP	0.235097	0.0511412	1.68572	0.0973497	0.725394	-4.61647
CTRB1	0.174644	-0.0217207	1.68518	0.0974531	0.725611	-4.61728
OR2J4P	0.165673	-0.0271298	1.68319	0.0978394	0.725611	-4.62029
CALCRL	0.284403	-0.0318373	1.68247	0.0979794	0.725611	-4.62137
TMEM59L	0.143471	0.0136204	1.68217	0.0980387	0.725611	-4.62183
ECM2	0.212447	0.107148	1.68216	0.0980405	0.725611	-4.62185
RPL21P122	0.186854	-0.000136406	1.68212	0.0980487	0.725611	-4.62191
CHFR	0.20429	-0.0457214	1.68209	0.098054	0.725611	-4.62195
NRBF2	0.194086	0.0348469	1.68165	0.0981399	0.725611	-4.62262
SON	0.181602	0.003979	1.68088	0.0982913	0.725611	-4.62379
TBC1D3G	0.179701	0.0229057	1.68025	0.0984129	0.725611	-4.62473
SPI1	0.281192	0.00232302	1.68014	0.098435	0.725611	-4.6249
CHMP2A	0.187519	-0.0239709	1.67995	0.0984712	0.725611	-4.62518
KDM5B	0.301282	0.0415923	1.67933	0.0985942	0.725611	-4.62613
TLE2	0.204113	-0.0140388	1.67881	0.0986956	0.725611	-4.62691
ELMO1	0.232356	-0.0275797	1.67867	0.0987226	0.725611	-4.62712
MAP1LC3B	0.224367	0.090874	1.67832	0.0987905	0.725611	-4.62764
TVP23BP1	0.181274	0.000679907	1.67827	0.0988007	0.725611	-4.62772
SCFD1	0.256667	-0.0263525	1.67771	0.0989103	0.725611	-4.62856
TBX19	0.183073	0.0286498	1.67737	0.0989785	0.725611	-4.62908
COMMD1	0.260682	-0.0281153	1.67715	0.0990211	0.725611	-4.62941
TUBB4BP6	0.164806	0.00368957	1.67667	0.0991158	0.725611	-4.63014
MEF2A	0.378952	-0.08892	1.67631	0.0991859	0.725611	-4.63067
IL17REL	0.182695	0.0651453	1.67578	0.0992915	0.725611	-4.63148
OR5BE1P	0.154451	-0.00397862	1.67566	0.0993148	0.725611	-4.63166
TYW1B	0.256628	0.0612421	1.67477	0.099489	0.725611	-4.63299
TRAPPC13P1	0.181412	-0.0257541	1.67454	0.0995345	0.725611	-4.63334
OR4F6	0.192597	-0.0148661	1.67418	0.0996058	0.725611	-4.63388
C2CD2	0.310483	0.0287746	1.674	0.0996412	0.725611	-4.63415
IL17RA	0.232667	-0.0956897	1.67379	0.0996826	0.725611	-4.63447
DEFB136	0.192802	-0.0265843	1.67341	0.0997576	0.725611	-4.63504
KIAA1328	0.231448	0.000491813	1.67325	0.0997905	0.725611	-4.63529
HSPA12A	0.20525	0.0972877	1.67271	0.0998972	0.725611	-4.6361
COL15A1	0.139837	-0.020697	1.67182	0.100074	0.725611	-4.63744
SCG5	0.479315	-0.0336258	1.67165	0.100107	0.725611	-4.63769
PPP1R12A	0.281746	-0.0554131	1.67107	0.100223	0.725611	-4.63857
UBTFL10	0.219893	0.0734853	1.6703	0.100376	0.725932	-4.63972
SSXP9	0.160222	0.0261715	1.67016	0.100403	0.725932	-4.63993
USP32P1	0.253427	-0.0487009	1.66999	0.100437	0.725932	-4.64019
VN1R107P	0.21396	-0.0209881	1.66979	0.100476	0.725932	-4.64048
THEMIS3P	0.152343	-0.0279848	1.66847	0.100738	0.72666	-4.64246
COPS4	0.182687	-0.0672698	1.66838	0.100757	0.72666	-4.6426
LSM1P1	0.191368	0.0327465	1.66762	0.100908	0.726685	-4.64374
IGSF6	0.320476	0.113354	1.66751	0.10093	0.726685	-4.6439
VN1R74P	0.209834	0.0775029	1.66696	0.101039	0.72709	-4.64472
TPM2	0.21799	0.0152455	1.6664	0.101152	0.727658	-4.64557
USP9YP32	0.172806	-0.0236103	1.66619	0.101193	0.727658	-4.64588
UBTD2	0.300978	-0.0549135	1.66441	0.10155	0.728477	-4.64854
SMG1P5	0.383163	0.101018	1.66408	0.101616	0.728477	-4.64904
RHBDF2	0.171304	0.0422032	1.66038	0.102361	0.730629	-4.65457
SIRPD	0.200788	-0.0220565	1.65897	0.102647	0.731438	-4.65669
EDAR	0.257165	0.0599478	1.65829	0.102785	0.731916	-4.6577
MMP7	0.327251	0.130603	1.65752	0.102941	0.731916	-4.65885
TK2	0.23695	-0.0120156	1.65686	0.103075	0.731916	-4.65983
ZEB2P1	0.172886	0.0249596	1.65685	0.103077	0.731916	-4.65985
PNRC1	0.343174	-0.0635795	1.65683	0.103081	0.731916	-4.65988
FMNL3	0.247952	0.0556193	1.65655	0.103137	0.731916	-4.66029
PLA2G12AP1	0.170242	-0.0384043	1.65653	0.103141	0.731916	-4.66032
C22orf15	0.157906	0.0587788	1.65598	0.103253	0.731916	-4.66114
TRIM6-TRIM34	0.17223	-0.0406175	1.65566	0.103319	0.731916	-4.66162
GHR	0.251092	-0.0397174	1.65509	0.103434	0.732113	-4.66247
PGGT1BP2	0.177181	0.0205051	1.65485	0.103483	0.732113	-4.66282
NUP210P3	0.199329	0.0158834	1.65414	0.103629	0.732784	-4.66389
TRAV36DV7	0.177337	-0.0518177	1.65264	0.103934	0.734041	-4.66611
PEAK1	0.205971	-0.027777	1.65259	0.103944	0.734041	-4.66618
BCL2L2-PABPN1	0.167482	0.0131312	1.65213	0.104039	0.734253	-4.66687
SLC35E4	0.166328	0.0740965	1.65147	0.104174	0.734253	-4.66786
RNF169	0.219844	0.0686796	1.65139	0.104189	0.734253	-4.66797
BLVRA	0.197656	0.0115705	1.65137	0.104194	0.734253	-4.668
LIMA1	0.347935	-0.107381	1.65115	0.10424	0.734253	-4.66834
IGKV1-35	0.210994	-0.0803581	1.64835	0.104814	0.735096	-4.67248
OR6E1P	0.196553	-0.0140642	1.64785	0.104918	0.735096	-4.67323
KIAA2026	0.231299	-0.0809208	1.64732	0.105026	0.735096	-4.67401
DBN1	0.275546	0.071545	1.64727	0.105037	0.735096	-4.67409
ELOVL2	0.161004	-0.0280684	1.64682	0.10513	0.735096	-4.67476
COX6CP16	0.154965	-0.0259534	1.64677	0.10514	0.735096	-4.67483
PCDH11Y	0.165667	-0.0363815	1.6465	0.105195	0.73529	-4.67523
HMGA1P5	0.166661	0.0395214	1.64636	0.105224	0.735301	-4.67543
STX11	0.215576	-0.0157599	1.64521	0.105463	0.736311	-4.67715
THSD7A	0.245766	0.0133172	1.64476	0.105555	0.73648	-4.67781
MT1DP	0.181017	-0.0250419	1.64406	0.105701	0.737119	-4.67885
TAX1BP3	0.184929	0.0504789	1.64393	0.105727	0.737119	-4.67904
EBF2	0.227567	-0.0111941	1.64299	0.105923	0.737664	-4.68044
ZMYND10-AS1	0.143134	-0.0126483	1.64291	0.10594	0.737664	-4.68056
CTDSP2	0.211697	0.0235745	1.64276	0.10597	0.737683	-4.68077
RAB22A	0.193016	0.103267	1.64135	0.106265	0.738604	-4.68287
PODN	0.182189	-0.0022649	1.64086	0.106366	0.738782	-4.68358
TRIP11	0.248644	-0.012693	1.6407	0.106398	0.738782	-4.68382
DVL3	0.184608	-0.0139543	1.63899	0.106755	0.7391	-4.68634
RAB42	0.196155	-0.0191896	1.63854	0.106851	0.739289	-4.68702
ADCY1	0.249212	-0.0108643	1.63827	0.106907	0.739447	-4.68741
SVIL-AS1	0.397937	0.0859376	1.63756	0.107054	0.739682	-4.68845
NDUFS6P1	0.213249	-0.0536293	1.63705	0.107161	0.739682	-4.6892
TNNC1	0.191406	-0.0149721	1.637	0.107173	0.739682	-4.68929
NRSN1	0.212153	-0.068383	1.63683	0.107207	0.739682	-4.68953
CSRP3	0.192574	-0.0272227	1.63608	0.107366	0.739682	-4.69065
EIF4EBP2P2	0.193826	-0.00474603	1.63571	0.107442	0.739682	-4.69118
MED12L	0.18577	-0.0510845	1.63546	0.107496	0.739682	-4.69156
PAPPA2	0.195825	0.0163728	1.63497	0.107599	0.739682	-4.69227
WHAMMP2	0.202349	-0.00595842	1.63497	0.107599	0.739682	-4.69228
MAP4	0.277264	0.00160124	1.63486	0.107621	0.739682	-4.69243
AKAP8	0.204584	-0.0140505	1.63483	0.107628	0.739682	-4.69248
JMJD1C-AS1	0.203988	0.0302274	1.63482	0.107629	0.739682	-4.69249
RTP3	0.1411	-0.0265778	1.63465	0.107666	0.739682	-4.69275
TENM2	0.166334	-0.00389068	1.6343	0.107739	0.739785	-4.69326
PSAT1P2	0.187332	-0.0129936	1.63392	0.107819	0.739939	-4.69382
PTGES	0.151552	0.0138098	1.63289	0.108036	0.740551	-4.69533
ZNF674	0.172057	0.0115898	1.6326	0.108097	0.740782	-4.69576
TPBG	0.370813	-0.0592202	1.63221	0.108181	0.740987	-4.69634
DMPK	0.156595	-0.00334927	1.63148	0.108334	0.741832	-4.69741
HOTAIRM1	0.326867	0.0783354	1.63101	0.108434	0.741832	-4.6981
CICP9	0.212322	-0.0066409	1.63085	0.108468	0.741832	-4.69834
DUTP8	0.157854	-0.0127885	1.63057	0.108526	0.741908	-4.69874
TRGV10	0.199007	-0.0304372	1.63004	0.108639	0.741908	-4.69952
ANO2	0.236251	0.0229554	1.63003	0.108642	0.741908	-4.69955
PABPC1L2B-AS1	0.195237	-0.0211698	1.6289	0.10888	0.742976	-4.7012
FTH1P9	0.124503	-0.0577317	1.62869	0.108927	0.743108	-4.70152
TLR10	0.2043	-0.119991	1.62776	0.109124	0.743381	-4.70288
IRGM	0.206157	0.0147094	1.62765	0.109147	0.743381	-4.70304
NCF1	0.303463	-0.153526	1.62722	0.109239	0.743381	-4.70367
NT5C2	0.474225	0.0109103	1.62713	0.109258	0.743381	-4.7038
CXXC1	0.212457	-0.0482833	1.62601	0.109495	0.743505	-4.70544
MMP17	0.236495	-0.016248	1.62587	0.109526	0.743505	-4.70565
CDY12P	0.238773	0.0115602	1.62543	0.109621	0.743505	-4.7063
NLGN4X	0.226621	0.0026358	1.62535	0.109636	0.743505	-4.7064
IGLV3-27	0.253826	0.0178377	1.62535	0.109638	0.743505	-4.70641
EXTL2	0.214334	0.0021211	1.62532	0.109642	0.743505	-4.70645
NFU1P2	0.183945	-0.0603105	1.62524	0.109661	0.743505	-4.70657
EOMES	0.204855	-0.0352654	1.6251	0.109691	0.743505	-4.70678
PCDHB6	0.141718	-0.00716413	1.62504	0.109702	0.743505	-4.70686
TPRKBP1	0.196921	-0.0644716	1.6248	0.109754	0.743505	-4.70721
C9orf92	0.194415	0.00150599	1.62437	0.109847	0.743505	-4.70785
PGAM1P9	0.18943	0.00738566	1.62433	0.109856	0.743505	-4.70791
HMGN2P39	0.163637	-0.00775611	1.62429	0.109864	0.743505	-4.70797
ZSWIM5P2	0.248515	-0.0363913	1.62391	0.109945	0.743505	-4.70852
GSTA12P	0.171263	-0.0630259	1.62352	0.110027	0.74374	-4.70908
IGLV1-50	0.271038	-0.0338424	1.62308	0.110123	0.743763	-4.70974
BRPF1	0.180082	0.02982	1.623	0.11014	0.743763	-4.70985
NARF-IT1	0.166391	-0.0299931	1.62215	0.110322	0.744259	-4.7111
OLR1	0.328235	0.149188	1.61975	0.110838	0.745625	-4.7146
WFDC10A	0.170574	-0.0449887	1.61957	0.110876	0.745625	-4.71486
IGK	0.708478	-0.140906	1.61926	0.110944	0.745625	-4.71532
DNAH11	0.173026	0.0443848	1.61912	0.110974	0.745625	-4.71552
IGKV1D-33	0.370747	0.0177294	1.61895	0.11101	0.745625	-4.71576
MTCO3P30	0.185199	0.0269579	1.61857	0.111092	0.745766	-4.71632
JAM3	0.299898	0.0464955	1.6176	0.111302	0.746079	-4.71774
CIAO1	0.219442	0.0797377	1.61751	0.111322	0.746079	-4.71788
EGR3	0.339926	0.0685214	1.61735	0.111355	0.746079	-4.7181
ANKRD42	0.191329	0.0217687	1.61689	0.111456	0.746079	-4.71878
RASA3-IT1	0.154245	-0.0252869	1.61612	0.111623	0.746396	-4.71991
MCHR2-AS1	0.166018	0.0154439	1.61582	0.111688	0.746432	-4.72034
CNIH2	0.257521	-0.0542645	1.61574	0.111706	0.746432	-4.72046
IGKV3D-11	0.577247	-0.148008	1.61559	0.111736	0.746432	-4.72067
FOXO1	0.347831	-0.0661107	1.61552	0.111752	0.746432	-4.72077
PPFIBP1	0.209645	0.0446447	1.61481	0.111907	0.746591	-4.72182
CARD8	0.180451	0.040552	1.61467	0.111937	0.746591	-4.72202
USP17L6P	0.193313	-0.0128219	1.61462	0.111948	0.746591	-4.72209
EXOSC3P2	0.192405	0.0389996	1.61399	0.112084	0.746668	-4.723
C5AR1	0.283073	0.0273066	1.61345	0.112203	0.746668	-4.7238
RHO	0.191255	0.0301838	1.61327	0.112242	0.746668	-4.72406
FOXI3	0.187287	0.00293434	1.61303	0.112294	0.746668	-4.72441
TNS2	0.201437	0.0169146	1.61298	0.112305	0.746668	-4.72448
CT47A7	0.157104	0.0116972	1.61179	0.112563	0.747557	-4.7262
RBPMS	0.391298	0.0474542	1.61123	0.112686	0.7481	-4.72702
MYO5A	0.232507	0.0158177	1.61117	0.1127	0.7481	-4.72711
NTRK3	0.20659	-0.0620236	1.61094	0.11275	0.748216	-4.72745
ST3GAL4	0.312066	-0.0848572	1.61058	0.112828	0.748219	-4.72796
RPS17P11	0.178902	-0.0742139	1.6103	0.11289	0.748449	-4.72838
ASTN2-AS1	0.130039	-0.0282484	1.6097	0.11302	0.748767	-4.72924
PTGES3P5	0.171659	0.00695311	1.60933	0.113101	0.74894	-4.72978
STK11IP	0.251839	0.0635314	1.60932	0.113103	0.74894	-4.72979
IGHVIII-13-1	0.161944	-0.0178752	1.60921	0.113128	0.74894	-4.72996
OR6X1	0.200342	0.0115124	1.60891	0.113192	0.74901	-4.73038
SCARNA11	0.230036	0.00746682	1.60876	0.113225	0.749038	-4.7306
SMCP	0.182535	-0.0121791	1.60837	0.113312	0.749071	-4.73118
GSTM3	0.427654	0.0345286	1.6081	0.113371	0.749277	-4.73157
IRF2BPL	0.35476	-0.0341564	1.60647	0.113728	0.750521	-4.73392
PRAMEF14	0.184566	0.0863793	1.60642	0.113741	0.750521	-4.73401
ZNF331	0.291576	0.0663513	1.60621	0.113786	0.750521	-4.73431
SMARCAL1	0.202601	-0.045012	1.60603	0.113825	0.750521	-4.73457
TCF25	0.180754	0.0665795	1.6045	0.114164	0.751035	-4.73679
ACVR2A	0.232813	0.0450501	1.60412	0.114246	0.751035	-4.73733
EYA2	0.21186	-0.0795206	1.60391	0.114293	0.751035	-4.73764
ZNF849P	0.221463	-0.0120149	1.60361	0.114359	0.751035	-4.73807
MTCO3P39	0.172716	-0.0596261	1.60333	0.114422	0.751035	-4.73848
TRBV21-1	0.180721	-0.0155083	1.60104	0.114929	0.752815	-4.7418
PRR12	0.171329	-0.0280382	1.60023	0.115109	0.752815	-4.74297
PIGN	0.316299	-0.0238217	1.60019	0.115118	0.752815	-4.74302
IGKV2-40	0.28331	0.031002	1.60004	0.11515	0.752815	-4.74323
CCND2-AS1	0.159113	-0.0454333	1.59968	0.11523	0.752815	-4.74375
SPP1	0.737157	0.608046	1.59962	0.115243	0.752815	-4.74384
CICP5	0.146956	-0.0173991	1.59906	0.115368	0.752815	-4.74465
TRDJ3	0.206687	-0.0330367	1.59863	0.115463	0.753074	-4.74527
TMEM38A	0.178987	0.0761823	1.59766	0.11568	0.753506	-4.74667
NBPF19	0.274189	-0.030366	1.59761	0.115691	0.753506	-4.74674
CCDC39	0.186315	-0.0229374	1.5965	0.115939	0.753589	-4.74835
ACAP3	0.155372	0.0324197	1.59559	0.116143	0.753589	-4.74966
CDON	0.234854	0.0235068	1.59521	0.116228	0.753589	-4.75021
MARK2P10	0.156137	0.0682254	1.59518	0.116235	0.753589	-4.75025
ADAP2	0.243103	-0.0919655	1.59518	0.116235	0.753589	-4.75025
PRMT3	0.205571	-0.0376358	1.59428	0.116435	0.753722	-4.75154
FAM86EP	0.213154	0.00237918	1.59408	0.11648	0.753722	-4.75183
TMC8	0.158522	0.0353174	1.59399	0.116501	0.753722	-4.75196
CACNA1S	0.212145	-0.00989519	1.59357	0.116596	0.754048	-4.75257
PLEK	0.383426	0.069903	1.59289	0.116747	0.754314	-4.75354
PLCE1-AS2	0.161603	0.00160944	1.5924	0.116857	0.754314	-4.75424
PPP4R1-AS1	0.141067	0.0671919	1.59223	0.116896	0.754314	-4.7545
OR4A11P	0.156732	-0.0346304	1.59084	0.11721	0.755403	-4.7565
SAMSN1	0.280354	0.00570152	1.59079	0.117221	0.755403	-4.75657
PRNP	0.182521	0.0471326	1.58968	0.117471	0.755985	-4.75816
ABCC5	0.215016	0.0178325	1.58878	0.117675	0.756834	-4.75946
GPR50	0.226151	0.0158139	1.58819	0.117807	0.757505	-4.76029
EVC2	0.215863	-0.0382111	1.58777	0.117902	0.757693	-4.76089
KCTD8	0.196813	-0.0266809	1.58628	0.118241	0.758176	-4.76304
RHOU	0.179242	0.0498175	1.58626	0.118245	0.758176	-4.76307
ZMIZ1	0.299006	0.0750854	1.58618	0.118263	0.758176	-4.76318
METTL7A	0.173788	-0.101344	1.58599	0.118305	0.758176	-4.76345
PROP1	0.204181	0.0307258	1.58566	0.118381	0.758176	-4.76393
MGAT2P1	0.197968	0.00937652	1.58558	0.1184	0.758176	-4.76405
ZNF559-ZNF177	0.218571	0.0489952	1.58497	0.118538	0.758176	-4.76492
OLFML3	0.205399	-0.0354505	1.58479	0.118579	0.758176	-4.76517
SMO	0.19095	-0.012587	1.58427	0.118698	0.758176	-4.76592
LRRC45	0.212152	-0.00227766	1.58387	0.118789	0.758176	-4.7665
PLXNA2	0.198572	-0.0610491	1.58383	0.118797	0.758176	-4.76655
SNORA16B	0.202476	0.0511147	1.58368	0.118831	0.758176	-4.76676
TRIM51HP	0.170671	-0.05357	1.58364	0.11884	0.758176	-4.76682
IGFL2	0.321198	0.102697	1.58349	0.118875	0.758176	-4.76703
SNORD116-19	0.321209	-0.0152978	1.58333	0.118911	0.758176	-4.76726
IGKV1D-12	0.24889	-0.0839258	1.58314	0.118955	0.75821	-4.76754
TMEM212-AS1	0.208982	0.032529	1.58252	0.119096	0.75821	-4.76842
SMOC1	0.240013	0.0827274	1.5825	0.1191	0.75821	-4.76844
RANP7	0.166698	-0.0379665	1.58221	0.119166	0.758211	-4.76886
DYNC1H1	0.240509	-0.0357042	1.58188	0.119242	0.758486	-4.76933
SNORD115-24	0.159172	-0.0184313	1.58178	0.119265	0.758486	-4.76948
CAPS2	0.209385	-0.0305695	1.58094	0.119458	0.759179	-4.77068
ADAMTSL4-AS1	0.23102	-0.0780881	1.58002	0.119669	0.75938	-4.772
DPPA5P1	0.179317	-0.00326219	1.5799	0.119697	0.75938	-4.77217
PCED1CP	0.147412	0.0504054	1.57985	0.119707	0.75938	-4.77224
MT1XP1	0.210305	-0.0770162	1.57978	0.119722	0.75938	-4.77233
PCDH8P1	0.196667	-0.00975692	1.57956	0.119774	0.75938	-4.77265
OBSL1	0.181739	-0.0395065	1.57947	0.119795	0.75938	-4.77279
RGS9	0.18943	-0.0713047	1.57918	0.119861	0.759619	-4.77319
URB2	0.155723	0.0050463	1.57901	0.1199	0.759688	-4.77344
PTPRQ	0.181325	-0.0919638	1.57866	0.119981	0.75985	-4.77394
PPP1R16B	0.17454	0.0154943	1.57816	0.120095	0.760044	-4.77465
ADAMTS4	0.197103	-0.0172074	1.57668	0.120436	0.760992	-4.77677
STX5	0.229261	-0.0132043	1.57613	0.120562	0.761007	-4.77754
PRELID3BP4	0.201043	0.0197912	1.57605	0.12058	0.761007	-4.77766
PCYT2	0.173662	-0.0304591	1.57603	0.120585	0.761007	-4.77768
CLC	0.211913	-0.0255934	1.57603	0.120586	0.761007	-4.77769
IL1RAP	0.232104	0.102389	1.57328	0.12122	0.762095	-4.7816
RAB3B	0.199849	-0.0298345	1.57291	0.121307	0.762095	-4.78213
MAGEB2	0.150433	-0.0302039	1.57266	0.121364	0.762095	-4.78248
AIG1P1	0.167854	0.0161489	1.5724	0.121424	0.762227	-4.78285
TRIM77	0.170415	0.0131761	1.57208	0.121498	0.762227	-4.7833
IGLVI-20	0.188221	-0.0477188	1.57143	0.121649	0.76228	-4.78423
IGHV4-55	0.288333	0.0191685	1.57051	0.121863	0.762771	-4.78554
GTF2A1L	0.225915	0.0148292	1.56985	0.122018	0.762794	-4.78648
NMNAT1P3	0.183297	-0.0458621	1.56945	0.122111	0.762794	-4.78705
SH3BGRL	0.21334	0.00712906	1.56931	0.122144	0.762794	-4.78725
CWF19L1	0.202246	0.0641718	1.56892	0.122234	0.762794	-4.7878
TCF23	0.20441	-0.0473998	1.56874	0.122276	0.762885	-4.78806
ARF4	0.25275	0.0706475	1.56835	0.122367	0.763046	-4.78861
DNAJC19P5	0.224536	0.0254612	1.5683	0.122378	0.763046	-4.78867
HIGD1AP6	0.208559	0.00207277	1.56792	0.122467	0.763376	-4.78921
TRAJ10	0.157699	-0.0588781	1.56517	0.12311	0.765058	-4.79311
MAP2K1	0.188841	-0.0159228	1.56503	0.123144	0.765058	-4.79332
PDPR	0.170035	0.0180962	1.5648	0.123197	0.765058	-4.79364
MOSPD2	0.259146	-0.0169099	1.56473	0.123213	0.765058	-4.79373
MED28P2	0.192994	-0.00754151	1.56406	0.123372	0.765238	-4.79469
CT45A5	0.179984	-0.014175	1.56343	0.123519	0.765741	-4.79558
EAF2	0.241719	-0.0790021	1.56126	0.124029	0.767076	-4.79864
KRT8P25	0.165144	0.0434587	1.56096	0.124101	0.767076	-4.79907
UBASH3A	0.161423	-0.0229755	1.56006	0.124313	0.767076	-4.80034
TRAV39	0.176409	0.0307696	1.55996	0.124337	0.767076	-4.80048
SLC4A1APP2	0.194413	-0.0485643	1.55988	0.124355	0.767076	-4.80059
GUCY2F	0.171126	0.0049265	1.55976	0.124384	0.767076	-4.80076
TRIM60P10Y	0.155937	-0.0289714	1.55976	0.124385	0.767076	-4.80077
SEMA3D	0.180385	0.0212083	1.55949	0.124447	0.767076	-4.80114
TCP11L1	0.16141	0.0145321	1.55939	0.124472	0.767076	-4.80129
IGLV9-49	0.159966	-0.0209298	1.55883	0.124605	0.767076	-4.80208
DPYSL3	0.234929	0.10039	1.55873	0.124629	0.767076	-4.80222
ZNF250	0.160303	0.0117775	1.55859	0.124661	0.767076	-4.80242
IGHV3OR16-10	0.251599	-0.0316405	1.55853	0.124675	0.767076	-4.8025
CUZD1	0.182774	-0.0129944	1.55759	0.124899	0.767574	-4.80383
STEAP2-AS1	0.18973	0.02228	1.55713	0.125006	0.767574	-4.80447
IQCB2P	0.13493	0.00584781	1.55711	0.125012	0.767574	-4.8045
FBXO11	0.266437	-0.0039171	1.5571	0.125013	0.767574	-4.80451
BNIP3P33	0.15097	-0.0319487	1.5569	0.125062	0.767574	-4.8048
SMARCA5-AS1	0.228469	0.00670612	1.55667	0.125115	0.767574	-4.80512
EMILIN1	0.161751	-0.0228749	1.55657	0.125139	0.767574	-4.80526
SLC22A25	0.165458	-0.0396612	1.55618	0.125232	0.767644	-4.80581
ANKRD30BL	0.126261	-0.0570195	1.55554	0.125384	0.767973	-4.80671
RHOQP2	0.168751	-0.0248954	1.55496	0.125524	0.767973	-4.80754
ACTN1	0.274757	0.0163172	1.55491	0.125535	0.767973	-4.8076
RD3L	0.165716	-0.0406989	1.55467	0.125592	0.767973	-4.80794
CITED2	0.26048	-0.0909017	1.55434	0.12567	0.767973	-4.8084
HECW2	0.264474	0.00628964	1.55423	0.125697	0.767973	-4.80855
NAV2-IT1	0.169462	0.0144904	1.55369	0.125825	0.768222	-4.80931
FCGR2C	0.293617	-0.0340232	1.55265	0.126075	0.768695	-4.81078
CDAN1	0.168295	-0.0217389	1.55226	0.126168	0.768695	-4.81133
LTN1	0.281025	0.0468906	1.55152	0.126345	0.768695	-4.81237
STARD9	0.155955	-0.0320528	1.55087	0.126499	0.768695	-4.81328
FABP7	0.151677	0.0136964	1.55084	0.126507	0.768695	-4.81332
TRAJ55	0.136467	-0.0255429	1.55064	0.126555	0.768695	-4.8136
LYNX1	0.208119	-0.0401556	1.5502	0.12666	0.768695	-4.81422
ATP6V1G1P3	0.188993	0.0508442	1.54966	0.12679	0.768695	-4.81498
THSD1	0.197931	-0.0344644	1.5495	0.126829	0.768695	-4.81521
SDC2	0.270651	0.0278581	1.54949	0.126831	0.768695	-4.81522
GNS	0.336253	0.145971	1.54907	0.126931	0.768695	-4.8158
CALB2	0.326963	0.0322924	1.54803	0.127182	0.768695	-4.81726
ULK4P1	0.241128	0.0352909	1.54788	0.127218	0.768695	-4.81747
SYNJ2-IT1	0.154549	-0.0136689	1.54786	0.127222	0.768695	-4.8175
UCN	0.153985	0.0458679	1.54772	0.127256	0.768695	-4.8177
CCDC17	0.150072	-0.00373533	1.5476	0.127286	0.768695	-4.81787
SNX9	0.276709	0.0610621	1.54756	0.127294	0.768695	-4.81792
IGLL5	0.626533	-0.15223	1.54742	0.127329	0.768695	-4.81812
FAM74A3	0.159301	-0.0490269	1.54735	0.127346	0.768695	-4.81822
TRAV23DV6	0.158501	-0.0327724	1.54688	0.127459	0.768695	-4.81888
IQGAP1	0.283054	-0.056259	1.54682	0.127472	0.768695	-4.81895
N4BP2	0.25218	-0.0190774	1.54672	0.127498	0.768695	-4.81911
CATSPER4	0.167961	-0.0486575	1.54659	0.12753	0.768695	-4.81929
OR52E7P	0.180388	-0.00640549	1.54657	0.127533	0.768695	-4.81931
FGD6	0.271739	0.0890553	1.54628	0.127603	0.768695	-4.81971
GOLGA8J	0.180312	-0.0534509	1.54612	0.127641	0.768695	-4.81994
GREM2	0.255152	-0.0133639	1.54586	0.127705	0.768695	-4.82031
ATL1	0.146335	-0.00983793	1.54492	0.127932	0.768695	-4.82162
MTCO2P9	0.171312	0.0135546	1.54432	0.128077	0.768695	-4.82246
NDP	0.217683	0.00629323	1.54404	0.128146	0.768695	-4.82286
KCNA4	0.165563	-0.0471563	1.5429	0.128421	0.76934	-4.82445
GTF2F2P2	0.20393	0.0264354	1.54261	0.128491	0.76934	-4.82485
TECTA	0.28909	-0.064132	1.54212	0.128611	0.769563	-4.82554
ARSA	0.169242	0.0150748	1.54209	0.128618	0.769563	-4.82558
BHLHE40-AS1	0.185504	-0.00299496	1.54169	0.128715	0.769808	-4.82614
EPHX1	0.326389	0.0592338	1.54146	0.128772	0.76998	-4.82646
IGLV3-21	0.2206	-0.0140664	1.54114	0.128848	0.770268	-4.8269
CD300A	0.252569	0.0071968	1.53998	0.129131	0.770645	-4.82852
MAPK10	0.151385	-0.0846304	1.53973	0.129192	0.770645	-4.82887
AK3P4	0.18979	-0.0238445	1.53948	0.129252	0.770645	-4.82921
ITGB1	0.344297	0.152407	1.53905	0.129357	0.770645	-4.82981
ZNF175	0.16046	-0.0225015	1.53884	0.129409	0.77065	-4.83011
ARID1B	0.223807	-0.0390546	1.53706	0.129842	0.771818	-4.83259
ATP8B4	0.175054	-0.0489684	1.53666	0.12994	0.772057	-4.83314
SNRPFP3	0.231428	0.0342926	1.53634	0.130021	0.772057	-4.8336
ADGRG7	0.219955	-0.0397179	1.53632	0.130024	0.772057	-4.83362
ZCWPW2	0.165605	0.0422153	1.53615	0.130067	0.772141	-4.83386
YAP1	0.259419	0.163218	1.53572	0.130173	0.772436	-4.83446
GGNBP1	0.155612	-0.000267053	1.53496	0.130357	0.772496	-4.83551
SYT11	0.187875	-0.0222432	1.53462	0.130441	0.772496	-4.83598
HMGB3P7	0.181048	0.00325395	1.53451	0.130469	0.772496	-4.83614
CACNA2D1	0.212543	-0.0462659	1.53438	0.1305	0.772496	-4.83632
ADPRM	0.210457	0.000634334	1.53394	0.130609	0.772496	-4.83694
IRS1	0.190912	0.0379345	1.53353	0.130708	0.772496	-4.8375
PRR4	0.228273	-0.0682944	1.53348	0.130721	0.772496	-4.83757
DAW1	0.16231	-0.0653486	1.53307	0.130824	0.772603	-4.83815
ARRDC5	0.164786	-0.020255	1.53257	0.130947	0.772996	-4.83884
GPR161	0.183029	0.00526047	1.53214	0.131051	0.773056	-4.83943
C6	0.190345	0.0305222	1.532	0.131086	0.773056	-4.83963
SAP25	0.192537	0.0283137	1.53172	0.131155	0.773056	-4.84002
PPP1R12B	0.368845	0.0151569	1.53118	0.131289	0.773676	-4.84077
GMCL1P2	0.144399	-0.0314539	1.53046	0.131466	0.774293	-4.84177
PLGLA	0.198382	0.0175937	1.52927	0.131759	0.775268	-4.84341
RPL29P19	0.176229	-0.0141623	1.52917	0.131786	0.775268	-4.84356
LATS2	0.205343	0.0562208	1.52864	0.131915	0.775595	-4.84428
TEAD2	0.272014	0.0643453	1.52861	0.131925	0.775595	-4.84434
HMGB3P26	0.172356	0.0314233	1.52796	0.132086	0.775595	-4.84524
RPL27P12	0.166183	0.0106651	1.52709	0.1323	0.776287	-4.84643
CNGA2	0.117386	0.04606	1.52685	0.132361	0.776448	-4.84677
CCNDBP1	0.212651	-0.0335202	1.52616	0.132533	0.776448	-4.84773
ZNF391	0.174832	0.0235572	1.52603	0.132564	0.776448	-4.8479
HNRNPMP1	0.171093	-0.0512162	1.526	0.132572	0.776448	-4.84795
TIPARP	0.230383	0.0170603	1.52545	0.132709	0.776448	-4.84871
ZNF821	0.17502	0.0394614	1.525	0.132821	0.776838	-4.84933
HIF1A-AS2	0.263314	0.00327157	1.52436	0.132981	0.777276	-4.85022
ATXN10	0.393267	0.0910534	1.524	0.13307	0.777429	-4.85071
TAS2R15P	0.290637	0.0336844	1.52378	0.133126	0.777432	-4.85102
CPNE5	0.218979	-0.00367984	1.52354	0.133185	0.777432	-4.85135
C1DP5	0.154138	-0.0276281	1.52337	0.133226	0.777432	-4.85158
ADAMTSL1	0.167679	-0.0689247	1.52308	0.133299	0.777432	-4.85198
RAP2B	0.18768	0.00208111	1.52292	0.13334	0.777432	-4.85221
DBIL5P2	0.143812	-0.0254337	1.52283	0.133362	0.777432	-4.85233
YEATS2-AS1	0.171876	-0.0229438	1.52259	0.133422	0.777432	-4.85266
RFPL3S	0.193553	-0.0297664	1.52126	0.133754	0.77757	-4.85449
STARD4-AS1	0.177145	-0.0299779	1.52094	0.133835	0.77757	-4.85493
TLR12P	0.220622	-0.00461296	1.52077	0.133879	0.77757	-4.85518
MPDZ	0.205307	-0.0116806	1.5207	0.133895	0.77757	-4.85527
ZBTB21	0.269654	0.0250185	1.52044	0.133961	0.77757	-4.85563
FASTK	0.187821	0.0136856	1.52028	0.134	0.77757	-4.85584
ERG	0.18214	-0.0050768	1.51995	0.134084	0.777725	-4.8563
ENPP4	0.168391	-0.0460191	1.51928	0.134252	0.778058	-4.85723
KRT16P2	0.133635	0.00584162	1.51927	0.134255	0.778058	-4.85724
BTK	0.261821	0.0535942	1.51891	0.134345	0.778084	-4.85774
F9	0.230753	0.0236987	1.5186	0.134423	0.778206	-4.85817
STX7	0.222054	0.0242976	1.51809	0.134552	0.778536	-4.85887
OR52Z1	0.180578	-0.00850362	1.51755	0.134687	0.778907	-4.85961
PECR	0.18667	0.04361	1.51709	0.134802	0.77891	-4.86024
KIFC2	0.182735	-0.0409322	1.51703	0.134817	0.77891	-4.86032
FBXL7	0.188053	-0.048891	1.51605	0.135064	0.77891	-4.86167
CCL17	0.198337	0.0262519	1.51603	0.135071	0.77891	-4.8617
C9orf72	0.206533	0.00332059	1.51551	0.135201	0.77891	-4.86241
ARHGEF40	0.178496	-0.0111153	1.51519	0.135283	0.77891	-4.86286
ACTB	0.167612	0.0860947	1.51512	0.135299	0.77891	-4.86295
TNRC6B	0.21974	-0.0988766	1.51509	0.135307	0.77891	-4.86299
CDH12P4	0.145554	0.0232276	1.51508	0.135309	0.77891	-4.863
BTF3L4P4	0.151965	0.0241852	1.51418	0.135538	0.77891	-4.86424
OR2AS2P	0.180325	0.0440348	1.51392	0.135603	0.77891	-4.8646
ANKRD2	0.19298	-0.00696379	1.51386	0.135618	0.77891	-4.86468
EFHC2	0.212388	-0.0147566	1.51371	0.135658	0.77891	-4.86489
RPL23AP62	0.188171	0.0304071	1.51366	0.13567	0.77891	-4.86496
TRIM62	0.156059	-0.0193625	1.5136	0.135686	0.77891	-4.86505
KLF8	0.22553	-0.0339055	1.51155	0.136206	0.780909	-4.86786
TECRP2	0.193316	0.0231558	1.51122	0.13629	0.781165	-4.86831
MOXD1	0.198887	-0.0053974	1.51025	0.136536	0.781981	-4.86964
SLC39A7	0.287333	-0.0147037	1.50967	0.136684	0.782319	-4.87044
BLOC1S4	0.180491	0.051926	1.5096	0.136702	0.782319	-4.87053
ANKRD44-IT1	0.163238	-0.0531217	1.50844	0.136998	0.783312	-4.87212
CFC1	0.145769	-0.0191977	1.50817	0.137066	0.783456	-4.87248
PPP4R1	0.263824	-0.102161	1.50722	0.13731	0.783456	-4.87379
GAGE12F	0.217972	-0.0762094	1.50588	0.137652	0.784098	-4.87562
TRO	0.294838	0.0816309	1.50498	0.137883	0.784431	-4.87685
CCDC136	0.18034	-0.00153431	1.50443	0.138023	0.784717	-4.87759
OR4K3	0.161695	-0.0201554	1.50411	0.138107	0.784717	-4.87804
C20orf181	0.164688	0.0154577	1.50409	0.138112	0.784717	-4.87807
DUXAP10	0.311926	0.144796	1.50382	0.138181	0.784819	-4.87844
LONRF2P1	0.153302	-0.0294276	1.50282	0.138437	0.785453	-4.87979
CILP	0.186355	0.0230381	1.50127	0.138837	0.785958	-4.88191
ITSN1	0.156017	-0.0268469	1.50015	0.139126	0.785958	-4.88343
MTND6P11	0.171314	-0.0350603	1.5	0.139164	0.785958	-4.88363
PPIL2	0.286744	-0.000174244	1.49991	0.139189	0.785958	-4.88377
POPDC2	0.17004	-0.0179455	1.4997	0.139243	0.785958	-4.88405
NEB	0.235003	-0.11345	1.49957	0.139276	0.785958	-4.88422
KIAA0930	0.131842	0.0053301	1.49883	0.139469	0.785958	-4.88524
U2AF1L4	0.141083	0.00673396	1.4988	0.139476	0.785958	-4.88527
SPDYE2B	0.155822	0.0170359	1.49804	0.139674	0.786089	-4.88631
SPDYE2	0.155822	0.0170359	1.49804	0.139674	0.786089	-4.88631
ANKRD20A18P	0.176547	-0.0556229	1.49798	0.139687	0.786089	-4.88639
PARP1P1	0.148616	0.0276731	1.49793	0.139702	0.786089	-4.88646
TEX38	0.189162	-0.0385282	1.49771	0.139758	0.786089	-4.88676
TRGJP1	0.394027	-0.0962794	1.49753	0.139805	0.786095	-4.887
MED9	0.156642	0.0573529	1.49718	0.139895	0.786375	-4.88748
GOLGA2P5	0.157158	-0.0387658	1.497	0.139942	0.786475	-4.88772
GCHFR	0.15284	0.0144791	1.49655	0.140059	0.78652	-4.88833
GPR137	0.159302	0.0924806	1.49516	0.14042	0.78652	-4.89022
UBE2V2P2	0.184315	-0.00674899	1.49471	0.140537	0.78652	-4.89083
LIFR-AS1	0.194017	-0.0235303	1.49466	0.14055	0.78652	-4.8909
TSPY16P	0.143269	0.00985549	1.49453	0.140586	0.78652	-4.89108
AP1B1	0.206947	0.0360763	1.49438	0.140625	0.78652	-4.89129
PGAM5P1	0.18552	0.00404715	1.49386	0.14076	0.78652	-4.89199
ZNF259P1	0.187193	-0.00160097	1.49372	0.140797	0.78652	-4.89218
DOCK11P1	0.183741	-0.0403815	1.49353	0.140846	0.78652	-4.89244
COX7A1	0.183737	-0.0473358	1.49333	0.140898	0.78652	-4.89271
GLT8D1	0.358655	0.0862362	1.49332	0.1409	0.78652	-4.89272
LHB	0.121719	-0.0387282	1.49258	0.141093	0.786899	-4.89372
BSNDP3	0.167159	-0.00214726	1.49251	0.141112	0.786899	-4.89382
CSPG4P5	0.197104	-0.00319626	1.49223	0.141185	0.786899	-4.8942
LPAR4	0.168434	-0.0026993	1.49155	0.141364	0.787132	-4.89513
HELB	0.169724	0.0235214	1.49127	0.141436	0.787132	-4.8955
CLIP1-AS1	0.198962	-0.0288418	1.49057	0.141619	0.787633	-4.89644
IFNA16	0.13697	-0.0236329	1.49024	0.141705	0.787837	-4.89689
TTC7A	0.188843	-0.0167089	1.48953	0.141894	0.787851	-4.89786
UBE2Q2P5Y	0.190883	0.00700195	1.48876	0.142093	0.788003	-4.89889
GCSAML	0.15253	-0.05854	1.48845	0.142176	0.788003	-4.89932
CD300LG	0.183532	0.0139061	1.48807	0.142276	0.788396	-4.89983
GAGE12I	0.213246	-0.0422033	1.4878	0.142347	0.788565	-4.90019
XAGE1B	0.179458	-0.0371153	1.48773	0.142364	0.788565	-4.90028
PPM1B	0.169878	0.0023336	1.48741	0.14245	0.788878	-4.90072
VIM2P	0.194374	0.021664	1.48729	0.142481	0.788887	-4.90088
LTBP1	0.178787	0.0513547	1.48685	0.142597	0.78925	-4.90148
WBP1LP3	0.189909	-0.00705002	1.48663	0.142655	0.789371	-4.90177
PABPC1P12	0.156737	-0.0276066	1.48615	0.142783	0.789447	-4.90243
LUZP2	0.187092	-0.0197518	1.48552	0.142947	0.789482	-4.90327
NFYAP1	0.273844	0.000188323	1.48508	0.143065	0.78961	-4.90387
FUT8-AS1	0.146725	-0.0245501	1.48469	0.143167	0.789918	-4.90439
TULP4	0.138435	-0.000527917	1.48413	0.143315	0.790242	-4.90515
CDK9	0.15478	0.0186245	1.48391	0.143373	0.790242	-4.90544
RBFOX2	0.19688	0.0321528	1.48391	0.143375	0.790242	-4.90545
FAM219A	0.198072	-0.0260248	1.48374	0.143418	0.790242	-4.90567
MTND2P19	0.149462	-0.0857132	1.48327	0.143544	0.790604	-4.90631
HECW1	0.20834	0.0284889	1.48236	0.143785	0.791444	-4.90754
IGKV1-39	0.481267	-0.0916502	1.4821	0.143853	0.791444	-4.90789
TBCK	0.222494	0.0244654	1.48181	0.14393	0.791444	-4.90828
TBL1X	0.364171	0.0596421	1.48176	0.143944	0.791444	-4.90835
RUFY2	0.293902	0.0494389	1.48158	0.143992	0.79148	-4.90859
PTPRZ1	0.163805	-0.145051	1.4812	0.144093	0.791827	-4.9091
OR2AO1P	0.146448	-0.0569514	1.48087	0.144179	0.792027	-4.90954
HLTF-AS1	0.152217	0.00704518	1.48038	0.14431	0.79227	-4.9102
SLC44A1	0.202861	0.00437845	1.47898	0.144684	0.79254	-4.91209
SERPINA7P1	0.154215	-0.0614495	1.47866	0.144767	0.792624	-4.91251
OR7E97P	0.208112	0.0352984	1.47861	0.144781	0.792624	-4.91258
MASP2	0.154253	-0.0173437	1.47795	0.144957	0.792665	-4.91346
FCGR1B	0.197887	-0.0520718	1.47767	0.145031	0.792665	-4.91384
GOLGA8K	0.208622	-0.035058	1.47759	0.145053	0.792665	-4.91395
BSN	0.162649	0.0661167	1.47686	0.145249	0.792736	-4.91493
[truncated: 25,303 more rows]

## Sheet: MU vs CT
Gene	logFC	AveExpr	t	P.Value	adj.P.Val	B
LOXL1	1.14496	0.0606832	6.12798	6.97348e-08	0.00105738	7.59461
MUC2	1.98732	-0.132723	6.101	7.74584e-08	0.00105738	7.50252
FGF7	0.767771	-0.0148713	5.76622	2.82898e-07	0.00257456	6.36563
MEG8	0.629374	-0.005322	5.68623	3.84529e-07	0.00262461	6.09595
LGALS1	0.845242	0.146609	5.54589	6.57096e-07	0.0030731	5.62497
ANGPTL2	0.831982	0.0230773	5.53868	6.75357e-07	0.0030731	5.60087
AEBP1	0.89598	0.11787	5.36235	1.31663e-06	0.00456931	5.01375
BASP1	0.665308	-0.022556	5.22244	2.22576e-06	0.00675196	4.55188
SNORD114-25	1.02948	-0.0993632	5.18377	2.57129e-06	0.00702015	4.42491
FGFR1	0.660765	0.0709306	5.1472	2.94641e-06	0.007313	4.3051
FBN1	0.630683	0.0372478	5.11614	3.30679e-06	0.0075235	4.20358
GREM1	0.923218	0.0595475	5.05667	4.1217e-06	0.00855508	4.00976
SNORD114-21	0.595777	-0.081264	5.03979	4.3869e-06	0.00855508	3.9549
TUSC3	0.823734	0.0388936	5.00769	4.93816e-06	0.00898812	3.85077
MFAP2	0.790275	0.117564	4.96878	5.69823e-06	0.00972332	3.72482
STAB1	0.556776	-0.0896394	4.94114	6.30644e-06	0.0101281	3.63561
GPX8	0.745666	0.126494	4.87954	7.9003e-06	0.011983	3.43741
GLT8D2	0.917225	0.055094	4.85678	8.58381e-06	0.0123345	3.36443
ACTA2	1.02253	0.0734058	4.80496	1.03635e-05	0.0134704	3.19873
SPARC	1.10439	0.202998	4.79617	1.06991e-05	0.0134704	3.1707
MEDAG	1.00656	0.0125659	4.7922	1.08545e-05	0.0134704	3.15803
DSEL	0.565546	-0.0127229	4.75507	1.24156e-05	0.0146502	3.03987
SNORD114-22	0.509536	-0.0466085	4.74371	1.29356e-05	0.0146502	3.0038
CSRP2	0.680953	0.00451772	4.73362	1.3415e-05	0.0146502	2.97181
ARF4	0.498263	0.17662	4.71229	1.44869e-05	0.0152124	2.90423
COL1A2	0.75034	0.15965	4.67584	1.65157e-05	0.0167005	2.78903
SNORD114-14	1.05026	0.0584113	4.64697	1.83166e-05	0.01786	2.69807
CCDC80	0.801107	-0.0518529	4.63415	1.91767e-05	0.0180539	2.65775
FNDC1	0.481461	0.131923	4.61155	2.07896e-05	0.0189199	2.58678
SNORD113-1	0.72428	-0.0769749	4.56956	2.4145e-05	0.0212648	2.45533
GLI3	0.646866	0.0554966	4.55252	2.56517e-05	0.0218857	2.40217
SNORD114-20	0.547547	-0.11267	4.53797	2.70109e-05	0.0219909	2.35682
MMP2	0.760515	0.0579308	4.51801	2.89902e-05	0.0219909	2.29471
DKK3	0.78776	0.128377	4.51794	2.89969e-05	0.0219909	2.29451
RGS4	0.654184	0.0573452	4.50085	3.08042e-05	0.0227302	2.24142
FAM174B	0.659571	-0.00516128	4.44164	3.79504e-05	0.0260658	2.05827
CALD1	0.742101	0.142371	4.433	3.91195e-05	0.0260658	2.03164
BICC1	0.617112	0.0337992	4.43056	3.94556e-05	0.0260658	2.02413
ARHGAP1	0.502154	0.0657279	4.4189	4.11029e-05	0.0260975	1.98824
B3GALNT1	0.517473	0.0567477	4.39338	4.49443e-05	0.0272267	1.90984
PRDM6	0.445438	0.0366335	4.37571	4.7807e-05	0.0272267	1.85567
COL12A1	0.885816	0.280427	4.36651	4.93661e-05	0.0272267	1.82752
PALMD	0.485876	-0.0507171	4.36584	4.94816e-05	0.0272267	1.82547
FSTL1	0.471253	-0.0790461	4.36365	4.98621e-05	0.0272267	1.81875
MAP7D3	0.620478	-0.0257615	4.35227	5.18788e-05	0.0277725	1.78398
PALLD	0.624097	0.172007	4.30254	6.1659e-05	0.0317625	1.63254
COPZ2	0.755508	0.0520471	4.27256	6.83977e-05	0.034438	1.54163
PDE4D	0.853517	-0.0470252	4.2569	7.21956e-05	0.034438	1.49427
NFATC4	0.382797	0.00735362	4.24843	7.4333e-05	0.034438	1.4687
ADAM19	0.388483	0.0220408	4.24694	7.47148e-05	0.034438	1.46422
BGN	0.992332	0.351606	4.18782	9.15273e-05	0.039045	1.28644
MLLT11	0.440489	0.116277	4.17832	9.45494e-05	0.0397137	1.258
SULF1	0.893191	0.428712	4.16796	9.79573e-05	0.0405217	1.227
NID2	0.579902	0.0423964	4.14551	0.00010575	0.0416839	1.16
SNORD114-12	0.461468	-0.0984127	4.13941	0.000107969	0.0416839	1.14183
RHOJ	0.653328	-0.0514741	4.13824	0.000108401	0.0416839	1.13833
ANTXR1	1.00684	0.307975	4.11516	0.000117245	0.0444586	1.06971
RSPO3	0.612645	-0.075865	4.10077	0.000123107	0.046042	1.02703
LAMA2	0.613466	-0.100098	4.07124	0.000136038	0.0500507	0.939679
PRRX1	0.79354	0.102152	4.06053	0.000141041	0.0500507	0.908101
RYR2	0.428339	-0.0375469	4.06029	0.000141158	0.0500507	0.907373
RUNX1-IT1	0.715175	-0.0311757	4.04179	0.000150233	0.0524106	0.852909
OSMR	0.461762	0.0181449	4.03899	0.000151653	0.0524106	0.844684
ACVR1	0.50151	0.0935895	4.0266	0.0001581	0.0532382	0.808301
HECW1-IT1	0.40597	-0.00573466	4.02261	0.000160232	0.0532382	0.796595
LAYN	0.378217	0.0162207	4.01962	0.000161848	0.0532382	0.787828
CD109	0.515157	0.022918	4.01546	0.000164124	0.0533441	0.775628
VIM	0.552499	0.0326576	4.00081	0.000172382	0.0540002	0.732738
PTGIS	0.453557	-0.0410537	3.99922	0.000173303	0.0540002	0.728083
HTRA1	0.481517	0.0380444	3.99303	0.000176929	0.0540002	0.709995
TRDJ2	0.560204	-0.0318375	3.98182	0.000183683	0.0540002	0.677277
ZNF70	0.400156	0.0560429	3.98046	0.000184521	0.0540002	0.673302
CNTLN	0.368809	0.0066278	3.97838	0.000185803	0.0540002	0.667256
ARHGEF17	0.387074	0.0734063	3.97819	0.000185921	0.0540002	0.666701
PXDC1	0.54877	0.0414961	3.96435	0.00019471	0.0552868	0.626371
MXRA5	0.667463	0.13326	3.96369	0.000195134	0.0552868	0.624469
MYL9	0.806567	0.163669	3.95865	0.000198442	0.0552868	0.609793
CTSK	0.791896	0.0396947	3.95863	0.000198451	0.0552868	0.609757
GYPC	0.358588	-0.00494891	3.95225	0.000202713	0.0559038	0.591205
RUNX1	0.675231	0.180015	3.94789	0.000205673	0.0561529	0.578551
FGF7P2	0.41648	-0.0744871	3.944	0.000208352	0.0562047	0.567256
TPM4	0.408652	0.0389176	3.9305	0.000217908	0.057205	0.528121
CEP295NL	0.687097	0.118535	3.92363	0.000222927	0.0579654	0.508249
THY1	0.612016	0.142584	3.91259	0.000231236	0.059002	0.476321
SERPINF1	0.860508	-0.00358649	3.90649	0.000235951	0.0596476	0.458713
TIMP3	0.58675	0.10524	3.89341	0.000246373	0.060902	0.421015
MUC5B	0.716927	0.101024	3.8919	0.000247605	0.060902	0.416664
ZEB1	0.643793	0.0283218	3.88862	0.000250306	0.0610166	0.407203
NR2F2	0.652406	0.00821894	3.8815	0.000256249	0.0619125	0.386742
SFRP2	1.24142	-0.128682	3.87575	0.000261158	0.062545	0.370198
ASPN	0.953333	0.37336	3.86656	0.000269176	0.0637427	0.343835
ARHGAP31	0.637349	0.0143423	3.86432	0.000271174	0.0637427	0.337386
COL6A3	0.800109	0.240573	3.85606	0.000278637	0.0637427	0.313723
CACNG3	0.312278	-0.00733082	3.83438	0.00029919	0.0672058	0.251706
STEAP4	0.633527	-0.0261515	3.82658	0.000306925	0.0674241	0.229468
TMEM109	0.336406	-0.00789296	3.82482	0.000308696	0.0674241	0.224457
ADAP2	0.436974	-0.026969	3.80616	0.00032812	0.0694443	0.17131
ZBTB8A	0.348379	0.023649	3.79229	0.000343298	0.0720979	0.131936
ANOS1	0.599042	0.170873	3.78928	0.000346681	0.0722525	0.123399
SNORD113-4	0.620629	-0.0571877	3.77812	0.000359511	0.0740653	0.0917659
TAGLN	0.586109	0.0622419	3.77117	0.000367725	0.0740653	0.0721047
SERPINH1P1	0.445359	-0.016152	3.77013	0.000368973	0.0740653	0.0691581
LUM	1.01362	0.261215	3.76798	0.000371556	0.0740653	0.0630872
COL5A1	0.654966	0.110895	3.76729	0.000372394	0.0740653	0.0611257
PLXDC2	0.729627	0.158858	3.76566	0.000374368	0.0740653	0.0565244
SNORD114-28	0.355975	-0.0835916	3.75877	0.000382835	0.0751954	0.0370658
RBMS2	0.463396	0.049217	3.74668	0.000398129	0.0761576	0.00298756
FRMD6	0.548404	-0.0640556	3.74609	0.000398892	0.0761576	0.00132311
FAT4	0.419553	-0.115838	3.72855	0.000422172	0.0800426	-0.0480079
CDR1	0.822319	-0.0155003	3.71787	0.000436979	0.080631	-0.0779796
FGF7P1	0.385285	-0.0282057	3.71734	0.000437725	0.080631	-0.0794621
THBS2	0.751699	0.248674	3.71702	0.000438176	0.080631	-0.0803575
GAB3	0.473425	-0.048745	3.71701	0.000438194	0.080631	-0.0803934
VSIG4	0.654091	-0.020999	3.7157	0.000440042	0.080631	-0.0840525
GLIS3	0.599958	0.0511248	3.70767	0.000451583	0.0821941	-0.106557
TCF4	0.572495	0.0527429	3.70073	0.000461782	0.0834938	-0.125966
TGFB3	0.760607	0.0312684	3.69671	0.000467789	0.0840235	-0.137199
TRAJ56	0.83292	-0.00724583	3.68779	0.000481391	0.0859015	-0.162103
R3HCC1	0.351862	0.00362009	3.67318	0.000504499	0.0890697	-0.202834
MRAS	0.501308	0.107659	3.67245	0.00050567	0.0890697	-0.204847
RCAN1	0.468625	-0.0519781	3.66385	0.000519796	0.0909709	-0.228775
NREP	0.530597	0.0336283	3.65918	0.000527619	0.091752	-0.241748
HSCB	0.458007	0.0741946	3.65604	0.000532938	0.0920904	-0.250457
SRGAP2	0.493362	0.0857786	3.65066	0.000542184	0.0930987	-0.26539
SFRP4	1.19641	0.423021	3.64056	0.000559945	0.0947129	-0.29337
ADARB1	0.510315	0.022601	3.63942	0.000561992	0.0947129	-0.296537
MDFIC	0.603206	-0.00586319	3.6339	0.000571964	0.0958023	-0.311803
CTHRC1	0.700018	0.221366	3.6309	0.000577454	0.0958791	-0.320093
COL6A1	0.625165	0.104924	3.61425	0.000608862	0.100139	-0.366044
AKAP12	0.836761	-0.00548821	3.6109	0.000615373	0.100604	-0.37527
DCN	0.841019	0.127295	3.60553	0.000625964	0.100734	-0.390071
CLIC4	0.432233	0.0453568	3.60519	0.000626642	0.100734	-0.39101
BHLHE41	0.829406	0.10254	3.60489	0.000627238	0.100734	-0.391834
LBH	0.425596	0.062297	3.6007	0.00063563	0.101149	-0.403361
FBLN5	0.514731	0.00611021	3.59914	0.000638771	0.101149	-0.407636
VGLL3	0.566936	-0.0030386	3.59808	0.000640931	0.101149	-0.410562
PER3	0.580846	-0.0716015	3.59417	0.000648914	0.101552	-0.421296
GNAI2	0.604093	0.0463697	3.59319	0.000650927	0.101552	-0.423982
SNAI2	0.700442	0.0451618	3.57853	0.000681826	0.105561	-0.464185
ITPRIP	0.327666	-0.00319442	3.57736	0.000684359	0.105561	-0.4674
ADAMTS16	0.997285	0.102063	3.57492	0.000689655	0.105781	-0.47408
ADCY4	0.431617	-0.0549887	3.55966	0.000723675	0.110379	-0.515805
CHST1	0.265883	0.0271604	3.55081	0.000744111	0.11266	-0.539928
ITGA5	0.792673	0.11853	3.54136	0.000766556	0.113742	-0.565667
GSN	0.396987	-0.100187	3.53003	0.000794336	0.117157	-0.596491
COL3A1	0.765163	0.229328	3.52035	0.000818796	0.119544	-0.622744
MAN2B2	0.376557	0.0112664	3.51374	0.000835902	0.120166	-0.640639
RAB23	0.462026	0.0807453	3.50799	0.000851092	0.120396	-0.656223
SERPINE1	0.652192	0.165597	3.49079	0.000898037	0.124192	-0.702671
EFEMP2	0.354426	0.0197316	3.47838	0.000933425	0.127422	-0.736094
PEAK1	0.396384	0.058893	3.46275	0.000979889	0.131788	-0.778088
CRMP1	0.443174	0.0277453	3.46062	0.000986373	0.13201	-0.783788
NAV1	0.476402	0.0476911	3.45574	0.00100142	0.13228	-0.796869
FAM133CP	0.739861	0.0848779	3.4545	0.00100528	0.13228	-0.800194
EMCN	0.633458	-0.054234	3.4537	0.00100777	0.13228	-0.802335
CNTN4	0.399354	-0.0808396	3.44967	0.00102043	0.1333	-0.813116
CD53	0.696185	0.0482796	3.44234	0.00104386	0.135068	-0.83273
FLJ42393	0.333238	-0.0403874	3.43688	0.00106164	0.135117	-0.847319
NRP1	0.583056	0.0167885	3.43191	0.00107807	0.135117	-0.860586
PRRC2B	0.362267	0.0895951	3.4317	0.00107876	0.135117	-0.861132
PCDH7	0.621795	0.0857189	3.41431	0.00113818	0.139501	-0.907429
GNAI2P1	0.469392	0.0754125	3.40491	0.0011716	0.141687	-0.9324
PSD3	0.588697	0.0784495	3.4035	0.00117668	0.141687	-0.936139
CYTIP	0.493859	-0.053277	3.40102	0.00118568	0.141687	-0.942709
COL4A1	0.392377	0.0871503	3.40093	0.00118602	0.141687	-0.942957
LOX	0.745248	0.081819	3.39996	0.00118956	0.141687	-0.945529
GJA1	0.380708	0.0564161	3.39885	0.00119361	0.141687	-0.948464
VEGFC	0.524845	0.0508807	3.39291	0.0012156	0.14263	-0.964214
PARVA	0.370278	0.0907841	3.39203	0.00121887	0.14263	-0.966528
HIF1AP1	0.271346	-0.0196676	3.38854	0.00123198	0.14313	-0.975759
CNN1	0.672201	0.0978999	3.3856	0.00124316	0.143817	-0.983547
NPTN	0.434433	0.0511786	3.37833	0.00127114	0.145536	-1.00274
PMP22	0.645862	0.0479497	3.3776	0.00127401	0.145536	-1.00469
CXCL12	0.532807	-0.045206	3.37607	0.00127998	0.145608	-1.00872
IL3RA	0.37196	0.0718369	3.36192	0.00133655	0.149527	-1.046
RFTN2	0.564179	0.0106775	3.36063	0.00134181	0.149527	-1.04939
DOCK10	0.40513	-0.0491952	3.35753	0.00135457	0.150336	-1.05754
CD248	0.498984	-0.0225569	3.35201	0.00137759	0.151754	-1.07206
SVEP1	0.355283	-0.0866684	3.34225	0.00141914	0.154016	-1.09766
CHST11	0.472922	0.0481096	3.34181	0.00142105	0.154016	-1.09882
PDLIM5	0.387326	0.0821	3.34016	0.00142817	0.154016	-1.10312
ROR1	0.409999	-0.0399137	3.33233	0.00146258	0.154201	-1.12363
BLID	0.420996	0.0736128	3.33161	0.0014658	0.154201	-1.12552
MEG3	0.377959	0.0225559	3.33141	0.00146667	0.154201	-1.12603
COL15A1	0.287252	0.0313558	3.32743	0.00148451	0.154335	-1.13644
HYAL1	0.394245	0.0441329	3.32694	0.00148671	0.154335	-1.13772
COX6CP14	0.299953	-0.0162748	3.32458	0.00149742	0.154499	-1.1439
PLXND1	0.47	0.0795539	3.3023	0.00160192	0.163535	-1.20195
NRP2	0.754173	0.164316	3.30146	0.00160596	0.163535	-1.20412
MYLK	0.673973	0.0519476	3.30037	0.00161127	0.163535	-1.20696
P3H1	0.289917	0.0607824	3.29531	0.00163611	0.16483	-1.22012
CACNA1C-IT3	0.446805	0.057143	3.29356	0.00164476	0.165093	-1.22466
SLAMF1	0.346503	-0.0171351	3.28171	0.0017046	0.170472	-1.25539
PLPPR4	0.511746	-0.0595196	3.27395	0.00174486	0.17323	-1.27546
HSPB8	0.339457	-0.0668362	3.26122	0.00181288	0.176743	-1.30832
NCF1	0.532526	-0.0641235	3.26109	0.00181358	0.176743	-1.30865
NID1	0.368513	-0.0737208	3.25501	0.00184695	0.176743	-1.32431
CLMP	0.358183	0.0111361	3.25451	0.00184973	0.176743	-1.32561
UBE2Q2P8	0.501806	0.0639391	3.25446	0.00185001	0.176743	-1.32574
ADGRL2	0.371936	-0.00817815	3.25291	0.00185863	0.176743	-1.32973
GPC6	0.251184	0.0177214	3.25107	0.00186889	0.176743	-1.33446
CNTNAP4	0.3028	-0.0189796	3.24984	0.0018758	0.176743	-1.33763
AMY1B	0.28796	-0.0579091	3.2433	0.00191288	0.177421	-1.35444
C1orf162	0.575443	0.0294189	3.22718	0.00200721	0.182669	-1.39576
PARD6G	0.271838	0.0309661	3.21959	0.00205317	0.185614	-1.41519
TRIM43CP	0.271508	0.0260979	3.21408	0.00208709	0.18619	-1.42925
CAMK2D	0.549723	-0.0545689	3.21303	0.00209363	0.18619	-1.43193
POSTN	0.843961	0.237102	3.20311	0.00215629	0.190279	-1.45722
CD93	0.494358	0.0650371	3.20245	0.00216052	0.190279	-1.4589
ST3GAL3	0.336086	0.0672124	3.19124	0.00223355	0.193963	-1.48741
ST6GALNAC1	0.616169	-0.0436083	3.19059	0.00223787	0.193963	-1.48907
NEXN	0.674616	0.121357	3.1892	0.00224713	0.194149	-1.4926
QKI	0.468027	0.0258916	3.18645	0.00226549	0.194168	-1.49958
GABBR1	0.448701	-0.0366823	3.18516	0.00227413	0.194168	-1.50284
WIPI1	0.407138	-0.00212757	3.18492	0.00227579	0.194168	-1.50347
OSGEPL1	0.258897	0.0565136	3.17318	0.00235618	0.198573	-1.53321
COL11A1	0.644195	0.327002	3.17182	0.00236564	0.198573	-1.53664
GRIA3	0.646788	-0.0707445	3.17104	0.00237106	0.198573	-1.5386
SCRG1	0.367547	-0.112127	3.16986	0.00237933	0.198656	-1.54159
HCAR1	0.267601	0.00739167	3.16434	0.00241842	0.201304	-1.55554
PDGFRA	0.643012	-0.0848972	3.15502	0.00248577	0.204924	-1.57906
SNX24	0.565465	0.056662	3.15352	0.00249677	0.204924	-1.58284
GPR176	0.413614	0.0459729	3.15325	0.00249874	0.204924	-1.58352
RNF152	0.333584	0.0263611	3.15316	0.00249944	0.204924	-1.58376
FOXP1	0.614532	0.00491982	3.14487	0.00256112	0.207489	-1.60462
ADAM12	0.643805	0.152779	3.14302	0.00257505	0.208	-1.60926
INHBA	0.631867	0.320707	3.13243	0.00265635	0.211218	-1.63586
SNORA63	0.585371	-0.040032	3.13044	0.00267189	0.211218	-1.64084
FABP12P1	0.215123	-0.0122185	3.12989	0.00267618	0.211218	-1.64222
TGFBR1	0.367626	0.0859591	3.12821	0.00268936	0.211218	-1.64642
STOML1	0.285682	0.0707126	3.12811	0.00269016	0.211218	-1.64667
PRR16	0.50652	0.0422128	3.12665	0.00270171	0.211218	-1.65034
CD200	0.628576	-0.0439957	3.12574	0.00270889	0.211218	-1.65261
DACT1	0.413847	0.170096	3.12313	0.00272965	0.211718	-1.65913
SLC2A3	0.629306	0.162589	3.1176	0.00277416	0.212597	-1.67297
ADAMTS6	0.601841	0.156716	3.11635	0.00278436	0.212597	-1.6761
DAAM2	0.349562	-0.111263	3.11569	0.00278973	0.212597	-1.67775
MTND4P16	0.256255	-0.00238636	3.11521	0.00279366	0.212597	-1.67895
EFEMP1	0.658861	-0.115511	3.1152	0.0027937	0.212597	-1.67896
CD99	0.35934	0.0653402	3.10987	0.00283754	0.213495	-1.69227
TNFAIP6	0.62259	0.144862	3.10434	0.0028837	0.214763	-1.70606
MT1XP1	0.327042	-0.0293326	3.10418	0.00288501	0.214763	-1.70645
ABCC9	0.734831	0.124402	3.10165	0.0029064	0.215626	-1.71276
FCGBP	0.934537	-0.149572	3.09636	0.00295154	0.216179	-1.72593
FAM20C	0.377636	0.0210763	3.09182	0.0029908	0.216179	-1.73722
RPS6KC1	0.24971	0.0333202	3.08868	0.00301825	0.216179	-1.74502
PBX3	0.483316	0.0339692	3.08807	0.00302362	0.216179	-1.74654
COX7A1	0.330877	0.00463109	3.08768	0.00302698	0.216179	-1.74749
CPQ	0.474373	-0.0522743	3.08738	0.00302969	0.216179	-1.74825
SLC12A8	0.465238	0.168392	3.08736	0.00302987	0.216179	-1.7483
FAM114A1	0.296867	-0.0550574	3.08709	0.00303224	0.216179	-1.74897
COL14A1	0.530059	-0.0644449	3.08676	0.00303513	0.216179	-1.74978
PTPRZ1	0.334868	-0.0877088	3.08665	0.00303607	0.216179	-1.75005
CMTM3	0.430609	-0.00409073	3.08208	0.00307662	0.217406	-1.76138
SRGAP2C	0.47982	0.0630084	3.08152	0.00308168	0.217406	-1.76278
FZD7	0.493694	0.0493925	3.07825	0.00311103	0.218149	-1.77087
KLRD1	0.329608	0.0380426	3.07744	0.00311842	0.218149	-1.7729
CCDC88A	0.46629	0.0157074	3.07482	0.0031422	0.218149	-1.77938
TLR6	0.467692	-0.0102417	3.06866	0.00319876	0.220537	-1.79461
USP32P1	0.384651	0.0255031	3.06596	0.00322386	0.221707	-1.80127
PKD2	0.357332	0.0628112	3.06369	0.00324515	0.222166	-1.80689
SERPINA1	0.551804	0.117923	3.06178	0.00326308	0.222166	-1.81159
EDNRA	0.672937	0.100745	3.05986	0.0032813	0.222614	-1.81634
IL17RA	0.349884	-0.040578	3.05589	0.0033191	0.223197	-1.82611
ITGBL1	0.51648	0.0448062	3.05263	0.00335053	0.22413	-1.83415
GNB4	0.295616	0.0416294	3.05047	0.00337148	0.22413	-1.83946
KIAA0825	0.385827	-0.0563876	3.04874	0.0033884	0.22413	-1.84373
PXK	0.321224	0.0725111	3.04734	0.00340202	0.22413	-1.84715
PECAM1	0.390512	0.0489376	3.04711	0.00340437	0.22413	-1.84774
WDR47	0.319612	0.0900422	3.04629	0.00341235	0.22413	-1.84974
C1QTNF3	0.362519	0.0170163	3.04596	0.00341567	0.22413	-1.85057
GAS2L1	0.274247	0.00618191	3.04489	0.00342614	0.22413	-1.85318
BNC2	0.630199	0.0361515	3.04318	0.00344317	0.224357	-1.8574
SFRP1	0.486194	-0.220682	3.04022	0.00347265	0.22477	-1.86467
GUCY1A2	0.392987	-0.0849149	3.04006	0.00347421	0.22477	-1.86505
CRYZP2	0.28768	0.0493676	3.0386	0.00348887	0.225185	-1.86864
GAS1	0.275652	0.0117033	3.03657	0.00350925	0.225435	-1.87361
CSGALNACT1	0.376648	0.0305561	3.03547	0.00352046	0.225623	-1.87632
FCMR	0.49669	-0.0658048	3.0334	0.00354147	0.226438	-1.88139
DCHS1	0.458954	0.0204832	3.02547	0.00362313	0.229474	-1.90081
ANKRD20A10P	0.277054	-0.0207642	3.01697	0.00371255	0.230835	-1.92158
RAB31	0.79541	0.226895	3.01554	0.00372779	0.230835	-1.92507
FABP7	0.250903	0.0549706	3.01253	0.00376011	0.230835	-1.93242
UBE2Q2L	0.282915	0.0299185	3.00833	0.00380562	0.230835	-1.94266
METTL24	0.322082	-0.0222573	3.0067	0.00382344	0.230835	-1.94663
MAP4K4	0.283827	0.0218793	3.00641	0.00382663	0.230835	-1.94734
ADAM22	0.516615	0.0207427	3.00602	0.0038308	0.230835	-1.94827
DLEC1	0.562452	-0.0628615	3.00098	0.00388649	0.232186	-1.96056
COL24A1	0.425896	0.0681645	2.99984	0.00389916	0.232434	-1.96333
RELL1	0.323221	-0.0934245	2.99757	0.00392452	0.232781	-1.96884
GIMAP2	0.361027	0.0443053	2.99703	0.00393055	0.232781	-1.97015
DCLK2	0.456229	0.0764893	2.99119	0.0039966	0.235155	-1.98432
TREM2	0.325376	0.0902849	2.99034	0.00400632	0.235155	-1.98639
SGCB	0.520461	0.0694741	2.98774	0.00403615	0.235486	-1.9927
NEUROG1	0.275291	0.0273677	2.9877	0.0040366	0.235486	-1.9928
KLF9	0.324752	-0.0311569	2.9834	0.0040864	0.237183	-2.00322
EMP3	0.48744	-0.0438379	2.98294	0.00409176	0.237183	-2.00434
RBMS3	0.435852	-0.103566	2.9819	0.00410386	0.23738	-2.00685
MED12	0.423995	-0.0415004	2.97948	0.00413221	0.238195	-2.0127
LXN	0.601884	0.0295615	2.97916	0.00413603	0.238195	-2.01349
SNORD114-23	0.240553	-0.0506923	2.97812	0.0041482	0.238195	-2.01598
FST	0.268659	0.00529897	2.97749	0.00415568	0.238195	-2.01752
EGR2	0.286289	-0.00897697	2.97699	0.00416157	0.238195	-2.01872
YTHDC2	0.225093	-0.026468	2.97602	0.00417311	0.238356	-2.02107
MTMR9LP	0.229598	-0.0190801	2.97407	0.0041963	0.239181	-2.02578
ABCA1	0.383674	0.0834077	2.96577	0.00429642	0.241324	-2.04582
DAP	0.344765	0.0789143	2.96428	0.00431458	0.241324	-2.04941
CCL4L2	0.469112	0.0828337	2.96289	0.00433171	0.241324	-2.05277
TRBV21OR9-2	0.264731	0.0123241	2.95997	0.00436768	0.241389	-2.0598
TRAF3IP2	0.297287	0.0159175	2.95878	0.00438248	0.241718	-2.06267
SPINK4	1.07245	0.122921	2.95647	0.00441128	0.242732	-2.06823
HSPG2	0.413186	0.102386	2.95588	0.00441864	0.242732	-2.06965
FGF10	0.219431	-0.0446341	2.95493	0.00443047	0.242893	-2.07192
TPM1	0.447918	0.0874085	2.95266	0.00445907	0.243221	-2.07738
LAPTM5	0.463024	0.0490356	2.94955	0.0044985	0.243295	-2.08486
MS4A4E	0.373387	-0.0555566	2.94942	0.00450018	0.243295	-2.08518
TBKBP1	0.288591	-0.00807775	2.94656	0.00453664	0.243456	-2.09203
RDX	0.687666	-0.0777551	2.94624	0.0045408	0.243456	-2.09281
PLPP4	0.499352	0.154967	2.94579	0.00454651	0.243456	-2.09387
HTR2A	0.357368	-0.0751784	2.94385	0.00457156	0.243456	-2.09854
FERMT2	0.396825	0.0262066	2.94377	0.00457262	0.243456	-2.09874
UBE2Q2P11	0.280752	-0.0470009	2.94362	0.00457449	0.243456	-2.09908
HMGN1P34	0.241072	-0.0724618	2.93804	0.00464721	0.245888	-2.11247
CPA3	0.578246	-0.292137	2.93472	0.00469087	0.247487	-2.1204
GABRG3-AS1	0.22145	-0.0378538	2.93367	0.00470486	0.247499	-2.12293
SPOCK1	0.483338	0.132946	2.93202	0.00472681	0.247624	-2.12688
ITPKA	0.27201	0.00620069	2.93121	0.00473762	0.247624	-2.12882
SLC30A4	0.358248	-0.0658821	2.92877	0.0047703	0.247624	-2.13465
PDZRN3	0.245736	-0.0458905	2.92682	0.00479649	0.248456	-2.13929
IRAK3	0.443764	0.0560656	2.92355	0.00484084	0.249367	-2.1471
NR2F1-AS1	0.407595	0.0152916	2.92116	0.00487357	0.249661	-2.15281
COL10A1	0.642133	0.313577	2.92046	0.00488313	0.249661	-2.15448
GLI2	0.533328	0.114402	2.91411	0.00497106	0.252737	-2.16961
NBEAP1	0.538156	-0.0909279	2.90949	0.00503601	0.254752	-2.18061
IL4R	0.387059	0.0493985	2.90939	0.00503734	0.254752	-2.18083
C4BPAP2	0.279075	-0.0149716	2.9093	0.00503868	0.254752	-2.18106
SMAD7	0.385077	-0.03574	2.9051	0.00509838	0.256414	-2.19104
TGFB2	0.476971	0.0337481	2.90182	0.00514544	0.256414	-2.19883
CD83	0.317296	0.0218487	2.89901	0.00518609	0.257649	-2.20549
IGHV3-30-2	0.21998	0.0205255	2.89192	0.00528998	0.260063	-2.22229
BLVRA	0.271399	0.0573808	2.8915	0.00529614	0.260063	-2.22328
COL6A2	0.391342	0.0211923	2.88665	0.00536834	0.263041	-2.23474
SCG5	0.703637	0.0566969	2.88614	0.00537605	0.263041	-2.23596
CHST15	0.376718	-0.00951376	2.88078	0.005457	0.263773	-2.24861
PTN	0.298909	-0.0605774	2.88078	0.00545707	0.263773	-2.24862
HACD4	0.575837	0.0468588	2.88068	0.00545863	0.263773	-2.24886
PDGFRL	0.325011	0.0629564	2.87927	0.00548017	0.264345	-2.25219
AMOTL1	0.345919	0.032141	2.877	0.00551488	0.265015	-2.25754
FCGR1B	0.302556	0.00473911	2.87602	0.00552989	0.265015	-2.25984
ROR2	0.401367	0.0275942	2.87245	0.00558527	0.265691	-2.26827
FAM228B	0.253426	0.0129808	2.86684	0.00567311	0.266598	-2.28147
LST1	0.424822	0.0819066	2.86569	0.00569117	0.266951	-2.28416
HDLBP	0.386098	0.0653917	2.86511	0.00570041	0.266951	-2.28553
NPS	0.285985	-0.0065764	2.86174	0.0057541	0.269004	-2.29346
SPARCL1	0.749621	-0.0426616	2.85644	0.00583942	0.272061	-2.3059
REG4	1.19284	0.401587	2.85574	0.00585069	0.272122	-2.30753
SGIP1	0.617515	0.17754	2.85151	0.00591975	0.27347	-2.31745
MCTP1	0.50633	0.0767934	2.85086	0.00593041	0.2735	-2.31897
ANO8	0.284094	0.0188722	2.84813	0.00597539	0.274185	-2.32536
GFPT2	0.411309	0.0428983	2.84704	0.00599342	0.274442	-2.3279
PTPRM	0.62933	-0.000623746	2.84298	0.00606122	0.274908	-2.33741
PLK2	0.584068	0.0377075	2.8422	0.00607431	0.275026	-2.33923
MXRA8	0.479948	0.10519	2.84141	0.00608764	0.275173	-2.34108
SLC18A2	0.25556	0.0286547	2.83464	0.00620259	0.278562	-2.35688
ACKR1	0.342506	-0.0848475	2.83213	0.00624564	0.279081	-2.36272
SRY	0.261468	-0.059137	2.81927	0.00647109	0.285888	-2.39266
TIMP1	0.563815	0.246859	2.81846	0.0064856	0.285888	-2.39455
CERCAM	0.333599	0.0682511	2.81811	0.00649185	0.285888	-2.39536
TCF21	0.273658	-0.0349814	2.81078	0.00662391	0.287243	-2.41235
ATN1	0.290701	0.030929	2.80843	0.00666685	0.287243	-2.4178
TOX	0.468958	0.0120091	2.80806	0.0066736	0.287243	-2.41865
TFF1	1.29401	0.266581	2.80526	0.00672514	0.287243	-2.42514
NCF1B	0.336837	-0.0470561	2.80515	0.00672713	0.287243	-2.42539
SNORD114-2	0.309712	-0.0460491	2.80498	0.0067303	0.287243	-2.42579
TMEM185A	0.27473	0.00248938	2.80481	0.0067334	0.287243	-2.42618
CRTC3	0.342529	0.0391243	2.80244	0.00677729	0.287766	-2.43165
DMTN	0.273496	0.0354136	2.8015	0.00679483	0.287898	-2.43383
PZP	0.296575	-0.0327418	2.80114	0.00680149	0.287898	-2.43466
ZBTB7C	0.44426	0.004063	2.79965	0.00682943	0.288633	-2.43811
RCAN2	0.454273	-0.183463	2.7978	0.00686411	0.289651	-2.44238
CFH	0.276544	-0.0671868	2.79557	0.00690614	0.290974	-2.44753
IGFBP2	0.338768	0.0448691	2.79447	0.00692699	0.291403	-2.45007
FMNL3	0.383324	0.10038	2.79118	0.00698965	0.292661	-2.45766
KCNT2	0.363594	-0.059705	2.79072	0.00699837	0.292661	-2.45871
POU2F2	0.411489	-0.0376755	2.79065	0.00699977	0.292661	-2.45888
RUBCN	0.312999	-0.0242991	2.78827	0.00704558	0.293091	-2.46437
MAPKBP1	0.258365	-0.0132595	2.78646	0.00708049	0.293786	-2.46854
ATXN1	0.328236	0.0121464	2.78558	0.0070975	0.293935	-2.47056
KLF12	0.358674	-0.0895446	2.78208	0.00716577	0.295975	-2.47862
PRR30	0.279596	0.0684502	2.78137	0.0071796	0.296099	-2.48025
SLC23A2	0.292597	0.00305274	2.7767	0.00727164	0.298679	-2.49097
CTSL	0.266032	0.0330129	2.7739	0.00732743	0.299432	-2.49741
RFPL4AL1	0.248301	-0.00064296	2.77101	0.0073854	0.299432	-2.50404
PTPN21	0.247435	0.0396154	2.77098	0.00738588	0.299432	-2.5041
PTGS1	0.307704	-0.0136578	2.76846	0.00743671	0.300789	-2.50987
TVP23CP1	0.277386	-0.0207491	2.76793	0.00744756	0.300789	-2.5111
ECE2	0.26806	0.00832255	2.76142	0.00758064	0.303916	-2.526
CD163	0.632566	0.0637769	2.76023	0.00760516	0.304404	-2.52872
C1GALT1P3	0.256003	-0.0174877	2.75865	0.00763784	0.304404	-2.53232
DPYD	0.605479	0.0472337	2.75682	0.00767595	0.304404	-2.53651
BACE2-IT1	0.489826	0.145446	2.75371	0.00774091	0.304967	-2.5436
JAM2	0.604066	-0.146277	2.75126	0.00779264	0.306563	-2.5492
FAP	0.834975	0.406067	2.74098	0.00801263	0.310299	-2.5726
HLA-DRB9	0.364511	0.0852135	2.73633	0.00811398	0.313518	-2.58316
RFX4	0.201896	0.0301459	2.73611	0.00811872	0.313518	-2.58365
ADAM20P2	0.204031	-0.0541253	2.73395	0.00816631	0.313655	-2.58856
FILIP1L	0.601685	0.0597068	2.73363	0.00817341	0.313655	-2.58929
ARIH2OS	0.268359	0.0518701	2.73171	0.00821589	0.313655	-2.59365
FAM149A	0.304617	0.0213106	2.73169	0.00821631	0.313655	-2.59369
ADAMTSL4	0.274949	-0.046358	2.73151	0.00822036	0.313655	-2.5941
LRRC46	0.232853	-0.0136409	2.72634	0.00833573	0.316086	-2.60581
CYBRD1	0.618368	0.000988167	2.72462	0.00837454	0.316452	-2.60971
COL1A1	0.421517	0.077361	2.72394	0.00838996	0.316452	-2.61125
CALU	0.256633	0.0739228	2.72138	0.00844799	0.317262	-2.61704
KCNMA1-AS1	0.192873	-0.0057504	2.71816	0.00852159	0.317262	-2.62432
TSHB	0.216635	-0.0716671	2.71719	0.00854386	0.317262	-2.62651
THSD7A	0.302237	0.0428859	2.71598	0.0085716	0.317262	-2.62923
DNM1P28	0.209457	0.0197021	2.7158	0.0085759	0.317262	-2.62965
IFNA16	0.235887	0.00787524	2.71222	0.00865889	0.319035	-2.63773
UBE2F	0.316615	0.0772683	2.71105	0.00868609	0.319176	-2.64036
MT2A	0.485533	-0.0622435	2.70823	0.00875222	0.320239	-2.64673
PDGFB	0.21935	0.0193994	2.70732	0.00877366	0.320239	-2.64878
SLCO2B1	0.398509	-0.0477883	2.70638	0.00879584	0.320619	-2.6509
ANAPC10	0.355686	0.0667748	2.7039	0.00885441	0.321467	-2.65646
OR10G7	0.295988	0.0796441	2.70254	0.00888691	0.321842	-2.65954
DRAXIN	0.243875	0.00953912	2.70182	0.0089041	0.321842	-2.66115
IQCJ	0.331763	0.089642	2.70149	0.0089119	0.321842	-2.66189
MLPH	0.455728	0.0100384	2.69949	0.00895982	0.323145	-2.66639
PDLIM7	0.213036	0.0709362	2.69882	0.00897603	0.323161	-2.6679
NUAK1	0.362969	0.092969	2.69686	0.00902319	0.323295	-2.67229
SLITRK6	0.474599	0.0104166	2.69509	0.00906607	0.323835	-2.67627
PPP2R2B	0.314003	-0.0393353	2.69434	0.00908422	0.323835	-2.67795
SCGB1B2P	0.22575	-0.00293633	2.68922	0.00920971	0.326126	-2.68944
ARL4C	0.393488	0.0540672	2.68815	0.00923593	0.326234	-2.69182
GPR65	0.464671	0.0439294	2.68464	0.0093231	0.327651	-2.69969
FAM171A2	0.211326	-0.0140426	2.68457	0.00932478	0.327651	-2.69985
WFDC1	0.413144	0.037121	2.67979	0.00944461	0.32974	-2.71054
PTPN14	0.316673	0.0734955	2.67722	0.0095096	0.33074	-2.71628
COPS4	0.231245	-0.036511	2.67567	0.00954877	0.331258	-2.71972
RND1	0.267132	0.00748607	2.67502	0.00956557	0.331304	-2.7212
TAT	0.245287	-0.0347526	2.66936	0.00971076	0.333921	-2.73381
BAAT	0.309656	-0.0100788	2.66865	0.00972902	0.333921	-2.73538
DLG4	0.316545	-0.00416366	2.6684	0.00973571	0.333921	-2.73595
THBS1	0.452966	0.0250075	2.66491	0.00982645	0.334855	-2.74372
COL8A1	0.254452	0.10203	2.66419	0.00984533	0.334855	-2.74532
OR7E86P	0.221123	0.00489031	2.66403	0.00984947	0.334855	-2.74568
SPATA18	0.376352	0.0963591	2.66401	0.00984985	0.334855	-2.74571
RBPMS	0.535876	0.141016	2.66122	0.00992318	0.336132	-2.75191
PNPLA3	0.373552	-0.0205184	2.66046	0.00994344	0.336401	-2.75362
WSB1	0.338113	-0.127862	2.65652	0.010048	0.337835	-2.76237
FCGR1A	0.519508	0.152518	2.65547	0.010076	0.337835	-2.7647
CACNA2D1	0.271265	-0.00758143	2.65399	0.0101155	0.337835	-2.76797
MSR1	0.359677	0.0539646	2.65399	0.0101156	0.337835	-2.76798
SNORD113-6	0.327857	0.0794596	2.65288	0.0101455	0.337835	-2.77044
RAP1GAP	0.636652	0.03688	2.65257	0.0101538	0.337835	-2.77113
IGKV3OR22-2	0.258048	0.0474909	2.65216	0.0101648	0.337835	-2.77204
SLC12A6	0.331793	-0.000949944	2.65212	0.0101658	0.337835	-2.77211
UBE2E2	0.402411	-0.0183128	2.65191	0.0101714	0.337835	-2.77258
TRIM49D1	0.244685	-0.0318076	2.65097	0.010197	0.338212	-2.77467
ADGRL4	0.432485	0.000605388	2.65058	0.0102076	0.338212	-2.77554
S1PR1	0.348061	-0.0237749	2.6499	0.0102259	0.338408	-2.77704
YIPF5	0.255882	0.0264865	2.64884	0.0102547	0.338476	-2.7794
F3	0.470164	-0.021102	2.64802	0.010277	0.338476	-2.78121
MSANTD3-TMEFF1	0.278366	-0.0286463	2.64493	0.0103615	0.339602	-2.78805
KLF11	0.241368	0.0283377	2.64341	0.0104031	0.34033	-2.7914
FAM177B	0.628123	-0.0199338	2.64275	0.0104213	0.34033	-2.79286
AMY1A	0.221402	-0.0480054	2.64231	0.0104335	0.34033	-2.79384
SNRK	0.348026	-0.0540098	2.63758	0.0105647	0.343377	-2.80428
RFTN1	0.437541	-0.0204247	2.63667	0.0105901	0.343793	-2.80628
IL6R	0.238231	-0.0319995	2.63603	0.0106081	0.343969	-2.80771
UBE2Q2P12	0.286056	-0.00292593	2.63441	0.0106535	0.34434	-2.81128
SPEG	0.218465	0.048336	2.63397	0.010666	0.34434	-2.81225
VAMP2	0.267653	-0.0088116	2.63364	0.0106753	0.34434	-2.81298
MBNL1-AS1	0.312506	-0.0588	2.63338	0.0106826	0.34434	-2.81355
MS4A1	0.417703	-0.0653949	2.62951	0.0107922	0.346646	-2.82208
SLC18A1	0.377074	0.12033	2.62748	0.01085	0.347684	-2.82653
FCGR2C	0.455004	0.0382059	2.62365	0.0109601	0.348915	-2.83496
CNN3	0.501427	0.0555118	2.62348	0.0109651	0.348915	-2.83534
WWTR1	0.314921	-0.0135238	2.62153	0.0110215	0.349894	-2.83963
GOLGA8J	0.233049	-0.0195487	2.61954	0.0110792	0.350485	-2.84399
TAL1	0.286503	-0.00927419	2.6187	0.011104	0.350485	-2.84585
RAB5B	0.285716	0.0355057	2.61627	0.0111749	0.351175	-2.85116
DEFB134	0.234107	0.0591274	2.60992	0.011363	0.355205	-2.86508
PYGO1	0.333298	0.0263117	2.60552	0.0114951	0.355522	-2.87472
PPP1R18	0.385652	0.0539988	2.60313	0.0115674	0.356847	-2.87995
FDCSP	0.691025	0.0159509	2.6027	0.0115803	0.356847	-2.88088
PNOC	0.297153	-0.0468567	2.60222	0.0115949	0.356894	-2.88193
RBPMS2	0.332183	-0.0186855	2.60135	0.0116213	0.3569	-2.88382
DIO2	0.22402	0.0428308	2.60066	0.0116422	0.357142	-2.88532
PIK3R5	0.329465	0.0246375	2.60015	0.011658	0.357226	-2.88645
LY96	0.553711	0.0835818	2.59893	0.0116953	0.35762	-2.88911
CIRBP	0.355638	-0.122444	2.59844	0.0117102	0.35762	-2.89017
PTGER2	0.34302	0.0148913	2.59764	0.0117349	0.357972	-2.89192
NXN	0.231811	0.0165148	2.59588	0.0117889	0.358466	-2.89576
GNE	0.294381	0.0797095	2.59435	0.0118362	0.35863	-2.89909
FLNA	0.348019	0.0481729	2.59316	0.011873	0.35863	-2.90168
PRKAR2B	0.330608	-0.0876554	2.59285	0.0118827	0.35863	-2.90235
IGHVIII-38-1	0.368388	-0.117318	2.59156	0.0119229	0.358663	-2.90517
LYNX1	0.323081	0.00513183	2.59055	0.0119543	0.358726	-2.90736
PTPRE	0.293349	0.00844178	2.59048	0.0119566	0.358726	-2.90752
BIN3	0.321018	0.0559165	2.58992	0.011974	0.358842	-2.90873
ARID1B	0.298279	-0.000776728	2.58892	0.0120055	0.358842	-2.91092
COLEC12	0.619349	-0.0256265	2.58562	0.0121094	0.360536	-2.9181
EPGN	0.239819	0.0271227	2.584	0.0121606	0.361666	-2.92161
CERS3-AS1	0.191434	-0.00424188	2.58354	0.0121753	0.361709	-2.92262
LRRC4B	0.277606	-0.0405914	2.58095	0.0122576	0.36298	-2.92822
GOLGA8A	0.259609	-0.0277038	2.57934	0.0123092	0.36314	-2.93172
CRH	0.198411	0.0571474	2.5666	0.012724	0.366933	-2.95929
GNA14	0.312341	-0.0497321	2.56615	0.0127391	0.366933	-2.96028
OR52E3P	0.221179	-0.0173171	2.56545	0.0127624	0.366933	-2.9618
RASSF2	0.340619	-0.00399056	2.56505	0.0127753	0.366933	-2.96264
COX6CP11	0.246914	0.0438959	2.56278	0.012851	0.367006	-2.96755
ABCA2	0.270422	0.0346117	2.55869	0.0129881	0.369903	-2.97638
PRKD1	0.50045	0.0742075	2.55819	0.013005	0.369903	-2.97746
ATP2A3	0.356959	-0.054898	2.55814	0.0130066	0.369903	-2.97756
SHISA2	0.312467	-0.0074398	2.55649	0.0130622	0.370488	-2.9811
GOLGA8K	0.301848	0.00955948	2.55369	0.0131575	0.371486	-2.98714
OR13D2P	0.188616	0.0158624	2.55227	0.013206	0.37247	-2.9902
CYCSP38	0.331031	-0.0253869	2.55136	0.0132372	0.37279	-2.99216
ZNF667-AS1	0.212335	-0.0257185	2.55082	0.0132555	0.37279	-2.9933
CCDC8	0.239423	-0.00697424	2.55074	0.0132583	0.37279	-2.99348
KCNK7	0.216903	0.0601928	2.54848	0.0133361	0.373368	-2.99834
RASA3-IT1	0.188703	-0.00595368	2.5477	0.0133631	0.373368	-3.00002
RGS3	0.210205	-0.000721319	2.54562	0.013435	0.373368	-3.00448
RNF112	0.255268	-0.0226662	2.5456	0.0134357	0.373368	-3.00452
ADAMTS14	0.186572	0.0022923	2.54489	0.0134604	0.373368	-3.00605
OR5W1P	0.187718	-0.0281736	2.5446	0.0134704	0.373368	-3.00666
PTENP1	0.190778	-0.00538868	2.54309	0.0135231	0.373691	-3.00991
ASIC3	0.260868	0.0867611	2.5418	0.0135683	0.373783	-3.01268
HGD	0.407722	0.0436082	2.54132	0.0135851	0.373783	-3.01371
SEC23A	0.326146	0.0314268	2.54117	0.0135904	0.373783	-3.01403
SMAP2	0.3615	-0.028791	2.54026	0.0136222	0.373783	-3.01597
HOXD3	0.282958	-0.0729678	2.53475	0.0138172	0.378239	-3.02777
C1R	0.419099	0.00808465	2.5345	0.0138262	0.378239	-3.02831
R3HDM2P1	0.226876	-0.0670475	2.53182	0.0139222	0.379188	-3.03405
CDK14	0.424108	-0.0743309	2.53178	0.0139237	0.379188	-3.03414
GRAP	0.315986	0.00444335	2.53167	0.0139274	0.379188	-3.03436
TEK	0.205079	0.00848347	2.53145	0.0139353	0.379188	-3.03483
CTXN3	0.218548	0.0196394	2.5312	0.0139442	0.379188	-3.03536
PHLDB2	0.446789	0.00397398	2.53067	0.0139633	0.379319	-3.03649
CTDP1	0.247236	0.00656632	2.5303	0.0139768	0.379319	-3.0373
IFFO1	0.209988	-0.0243982	2.5271	0.0140923	0.380233	-3.04412
ZDHHC15	0.377806	-0.0598208	2.52544	0.0141524	0.380233	-3.04765
AHNAK2	0.491549	0.0815532	2.52485	0.0141741	0.380233	-3.04892
GIMAP8	0.220667	-0.0551773	2.52278	0.0142498	0.380233	-3.05334
GFOD1	0.287399	-0.0725264	2.52206	0.0142761	0.380233	-3.05487
MT1X	0.434593	-0.0561856	2.52055	0.0143316	0.380233	-3.05809
GNG2	0.412132	-0.103063	2.51979	0.0143596	0.380257	-3.0597
QTRT1P1	0.211101	-0.0197414	2.51872	0.0143993	0.380325	-3.06199
ACR	0.249198	-0.010145	2.51464	0.0145508	0.382609	-3.07067
TRBV6-1	0.193122	-0.0343807	2.51445	0.0145579	0.382609	-3.07107
IFT80	0.293832	0.0555037	2.51421	0.0145666	0.382609	-3.07157
TRIM49D2	0.218162	-0.0271334	2.51335	0.0145989	0.38288	-3.0734
COL27A1	0.379367	0.156857	2.51043	0.0147085	0.384203	-3.0796
VSTM4	0.382717	0.0133275	2.51031	0.0147132	0.384203	-3.07986
EPO	0.227769	0.0197423	2.50517	0.0149081	0.387331	-3.09076
GOLGA8F	0.207105	-0.00279114	2.505	0.0149147	0.387331	-3.09113
SNORD113-3	0.374252	0.0239715	2.50339	0.0149761	0.388033	-3.09453
SNCAIP	0.32987	0.00996748	2.50203	0.0150282	0.38836	-3.09741
HLA-DRB1	0.358312	-0.00397728	2.50147	0.0150498	0.388364	-3.0986
PPP1R9B	0.248161	-0.0205742	2.50061	0.0150829	0.38885	-3.10041
CTSB	0.477745	0.26981	2.4994	0.0151294	0.389683	-3.10297
LTBP4	0.354787	-0.111152	2.49753	0.0152022	0.390451	-3.10694
PSORS1C2	0.232281	0.00100284	2.49708	0.0152196	0.39048	-3.10789
KLHL5	0.381312	0.0148309	2.49664	0.0152368	0.39048	-3.10882
HOXD8	0.210704	-0.0144596	2.49365	0.0153535	0.391483	-3.11513
GOLGA8B	0.225528	-0.0149919	2.49333	0.0153659	0.391483	-3.1158
HABP4	0.269923	0.0921683	2.49292	0.0153819	0.391483	-3.11666
SDC2	0.361338	0.0899401	2.49243	0.0154014	0.391483	-3.11771
C5AR1	0.484136	0.103749	2.49047	0.0154783	0.392011	-3.12183
LAMA1	0.223032	0.0687242	2.48816	0.0155699	0.393497	-3.12672
CR2	0.531012	-0.128397	2.48796	0.015578	0.393497	-3.12714
FBXL7	0.272171	-0.0136299	2.4879	0.0155802	0.393497	-3.12726
FNBP1	0.322006	-0.0404985	2.48611	0.0156513	0.39419	-3.13103
MAST4-IT1	0.274528	-0.0929741	2.4854	0.0156798	0.39419	-3.13253
PILRA	0.249039	0.0837804	2.48328	0.0157644	0.394433	-3.13698
KCTD9P6	0.220165	-0.000321995	2.47789	0.0159821	0.397317	-3.14832
MTFR1L	0.271686	0.0434822	2.47691	0.0160219	0.397343	-3.15038
MFAP4	0.323585	-0.0619911	2.47438	0.0161255	0.398664	-3.1557
TMEM50B	0.270118	-0.00947279	2.47389	0.0161454	0.398664	-3.15672
CMA1	0.226221	-0.0471198	2.47136	0.0162495	0.398757	-3.16203
RUNX1T1	0.296911	0.0178678	2.46979	0.0163143	0.399475	-3.16532
SNX11	0.202988	0.0497219	2.46979	0.0163144	0.399475	-3.16532
LIF	0.188805	-0.0233991	2.46929	0.016335	0.399622	-3.16637
KLK14	0.198486	0.0450069	2.46661	0.0164465	0.40031	-3.17199
TSPAN16	0.233855	0.00505965	2.46585	0.0164779	0.40031	-3.17356
NAV3	0.252314	0.0401573	2.46554	0.0164911	0.40031	-3.17422
CDH13	0.26772	0.05942	2.46535	0.016499	0.40031	-3.17462
CNDP1	0.252777	0.0845848	2.46398	0.0165563	0.400755	-3.17748
HMGN2P13	0.239347	-0.0476555	2.46288	0.0166026	0.400755	-3.17979
BACE2	0.333064	0.11599	2.46117	0.0166747	0.401723	-3.18336
AKAP13	0.419817	-0.0726592	2.4609	0.0166857	0.401723	-3.18391
SNX19	0.211823	0.0450187	2.45687	0.0168566	0.403194	-3.19232
MZF1-AS1	0.235076	0.0116137	2.45565	0.016909	0.403194	-3.19488
SEMA7A	0.23571	0.0130284	2.45502	0.016936	0.403194	-3.1962
PLD3	0.250985	0.00864471	2.45445	0.0169603	0.403353	-3.19738
MT1G	0.301163	-0.0331755	2.45385	0.0169859	0.403612	-3.19863
ADGRA2	0.317826	0.0817769	2.45222	0.017056	0.403714	-3.20203
ROCK1	0.28225	-0.0183329	2.45137	0.0170928	0.403714	-3.2038
P2RX5-TAX1BP3	0.29483	-0.0239543	2.45075	0.0171196	0.403714	-3.2051
PSKH1	0.2311	-0.0216672	2.45046	0.0171319	0.403714	-3.20569
IL13RA2	0.222098	-0.079699	2.4498	0.0171606	0.403714	-3.20707
ELOVL2	0.20336	-0.00732932	2.44934	0.0171807	0.403714	-3.20803
INSM1	0.266056	-0.00600293	2.44923	0.0171851	0.403714	-3.20825
KCNJ8	0.158815	-0.0101745	2.44827	0.0172268	0.403714	-3.21025
SPP1	1.00933	0.751382	2.44704	0.0172805	0.404389	-3.21281
PGAM1P11	0.213518	-0.0180452	2.44488	0.017375	0.405629	-3.21731
CXCR4	0.430791	0.0496479	2.44457	0.0173885	0.405629	-3.21795
SLC25A44	0.301122	-0.0368384	2.44436	0.0173977	0.405629	-3.21839
TYK2	0.25172	-0.0126627	2.44386	0.0174196	0.405794	-3.21942
NHSL2	0.331561	-0.0364088	2.4429	0.0174618	0.406356	-3.22142
LTBP2	0.207231	0.0532091	2.44087	0.017551	0.407463	-3.22562
PIAS3	0.410223	0.0676588	2.43994	0.0175924	0.407484	-3.22756
FXYD6P3	0.232662	0.0337096	2.43987	0.0175955	0.407484	-3.2277
SMARCA1	0.327918	-0.0692646	2.43943	0.017615	0.407484	-3.22862
AUH	0.190481	0.0143426	2.43936	0.017618	0.407484	-3.22876
PAM	0.424936	0.106895	2.43687	0.0177287	0.407756	-3.23392
ZNF420	0.265568	-0.0317224	2.43589	0.0177727	0.407756	-3.23596
MEIS3P1	0.293473	-0.0982098	2.43353	0.0178783	0.409377	-3.24085
RIMKLB	0.330578	-0.0368683	2.43331	0.0178883	0.409377	-3.24131
ZSCAN20	0.167953	-0.0421007	2.42989	0.0180424	0.409812	-3.24837
SMYD1	0.241625	0.0345819	2.42826	0.0181164	0.410809	-3.25174
GUSBP11	0.212416	0.0207889	2.42692	0.0181774	0.411169	-3.25451
DYRK4	0.305074	0.0647822	2.42395	0.0183134	0.413387	-3.26065
IGKV2D-10	0.206445	-0.0653017	2.42346	0.0183361	0.413387	-3.26167
LEF1-AS1	0.283727	-0.00212038	2.42236	0.0183866	0.413503	-3.26393
POLI	0.287729	-0.0928259	2.42197	0.0184046	0.413565	-3.26474
OR2A3P	0.20742	-0.040745	2.41944	0.0185214	0.414239	-3.26995
OR7E157P	0.201812	-0.0147438	2.41626	0.0186696	0.416264	-3.27651
PCDHB10	0.279967	0.0489296	2.41578	0.0186917	0.416264	-3.27748
BST2	0.580171	-0.0114437	2.41506	0.0187257	0.416264	-3.27897
ADAM3B	0.310245	-0.106226	2.4148	0.0187377	0.416264	-3.2795
KYNU	0.301243	0.0115247	2.41422	0.0187651	0.416264	-3.2807
MGARP	0.269263	-0.0396019	2.41243	0.0188493	0.4167	-3.28439
GAGE12D	0.224668	-0.0269648	2.4087	0.0190256	0.417174	-3.29204
GAGE12G	0.224668	-0.0269648	2.4087	0.0190256	0.417174	-3.29204
GAGE12H	0.224668	-0.0269648	2.4087	0.0190256	0.417174	-3.29204
FBXO32	0.441039	-0.00964351	2.40776	0.0190701	0.417174	-3.29396
SMO	0.240508	0.0136244	2.4072	0.019097	0.417174	-3.29512
CSRP1	0.388409	0.10192	2.40714	0.0191	0.417174	-3.29525
RASGRP4	0.195405	0.0263431	2.40663	0.0191242	0.417369	-3.29629
PIEZO2	0.332624	-0.0746331	2.4033	0.0192835	0.41862	-3.30311
USP3-AS1	0.196753	-0.0324296	2.40298	0.0192991	0.41862	-3.30378
CD44	0.372683	0.111273	2.4023	0.0193319	0.41862	-3.30517
WWC2	0.29185	0.0663295	2.40225	0.0193343	0.41862	-3.30528
PREX1	0.506078	-0.0421989	2.40219	0.0193372	0.41862	-3.3054
CHI3L1	0.33038	0.194049	2.40127	0.0193815	0.41862	-3.30728
RSU1P3	0.289852	0.0331846	2.39982	0.0194516	0.41862	-3.31024
UBTD2	0.332515	-0.0156874	2.39961	0.0194616	0.41862	-3.31067
CDC42SE1	0.264621	0.0512276	2.3982	0.0195302	0.41862	-3.31356
SEC24B	0.292024	-0.0189017	2.39779	0.01955	0.41862	-3.31439
AGR2	0.954502	0.322371	2.39749	0.0195648	0.41862	-3.31501
LSM3P4	0.195879	-0.0503213	2.39554	0.0196601	0.419907	-3.31901
TP73	0.218064	-0.00124188	2.39531	0.0196711	0.419907	-3.31946
FPR1	0.403277	0.156842	2.39422	0.0197246	0.420391	-3.32169
TUBB3P2	0.228309	-0.0491724	2.39304	0.0197829	0.420796	-3.32412
PLEKHO1	0.225272	-0.0059763	2.38997	0.0199343	0.420796	-3.33038
HLA-DPB1	0.314445	0.0631391	2.38892	0.0199864	0.420796	-3.33252
P2RY13	0.338894	-0.00668356	2.38848	0.0200082	0.420796	-3.33342
MCEMP1	0.257622	-0.0045705	2.3871	0.0200766	0.420796	-3.33622
EGFL7	0.188446	0.0027832	2.38659	0.0201024	0.420796	-3.33727
AQP4-AS1	0.189687	-0.0226995	2.38637	0.0201134	0.420796	-3.33773
SPI1	0.340861	0.0377451	2.38559	0.0201523	0.421285	-3.33931
TMEM199	0.251029	-0.0318634	2.38372	0.0202457	0.422076	-3.3431
SDHA	0.2339	0.0233106	2.38351	0.0202566	0.422076	-3.34355
ARHGAP29	0.360048	0.0678988	2.38174	0.0203456	0.422076	-3.34714
CYP1B1	0.305022	0.0495372	2.38054	0.0204063	0.422076	-3.34959
XBP1	0.281262	0.0173965	2.38037	0.0204149	0.422076	-3.34993
PAFAH2	0.172442	0.00361098	2.37989	0.0204389	0.422076	-3.3509
TXNDC5	0.257684	-0.0559237	2.37962	0.020453	0.422076	-3.35146
OLFML2B	0.310434	0.02225	2.37893	0.0204876	0.422472	-3.35285
ABHD5	0.215473	-0.0460964	2.3765	0.0206112	0.42406	-3.35779
SAA3P	0.159622	0.0137719	2.37533	0.0206712	0.424973	-3.36017
RBMS1P1	0.280864	0.0284308	2.37429	0.0207243	0.425426	-3.36228
SETBP1	0.319166	-0.0500515	2.3736	0.0207599	0.425836	-3.36368
NRF1	0.238375	0.00542667	2.37253	0.020815	0.426325	-3.36585
KCNH5	0.212411	-0.0402545	2.37199	0.0208428	0.426574	-3.36695
CPXM2	0.351295	-0.000117502	2.36961	0.0209659	0.428201	-3.37178
IKZF2	0.330654	-0.0316056	2.36712	0.0210949	0.430443	-3.37681
GFM1	0.200442	-0.0538666	2.36548	0.0211805	0.431571	-3.38012
MBD5	0.275207	-0.0750129	2.36546	0.0211818	0.431571	-3.38017
GRIK3	0.193677	0.000657015	2.3639	0.0212637	0.432271	-3.38333
CLEC7A	0.412323	0.126114	2.36243	0.0213405	0.432566	-3.38629
AK1	0.290119	0.017452	2.36201	0.0213629	0.432566	-3.38715
KRTAP12-2	0.24633	0.0631222	2.3619	0.0213686	0.432566	-3.38737
VCAN-AS1	0.432493	0.0736399	2.36164	0.0213822	0.432566	-3.38789
C1S	0.533452	0.0678842	2.36151	0.0213891	0.432566	-3.38815
RTP5	0.190891	0.0297618	2.3589	0.0215274	0.433171	-3.39344
ZNF532	0.502432	0.111987	2.35836	0.0215558	0.433171	-3.39451
HNRNPA3P4	0.192983	-0.0122707	2.3582	0.0215643	0.433171	-3.39484
CAV1	0.365892	0.0543044	2.35787	0.0215822	0.433171	-3.39552
ARHGAP25	0.294586	-0.0378534	2.35534	0.0217168	0.434686	-3.40061
HS3ST3A1	0.255279	0.00441231	2.35264	0.0218617	0.436145	-3.40605
MUC4	0.413099	-0.0770854	2.35166	0.0219145	0.436145	-3.40803
UNC93B5	0.143921	0.0200171	2.35144	0.0219262	0.436145	-3.40846
DPT	0.497771	-0.134892	2.35127	0.0219356	0.436145	-3.40882
ST3GAL4	0.379905	-0.0516453	2.34778	0.0221244	0.437089	-3.41583
PXN-AS1	0.21796	0.0131297	2.3473	0.0221503	0.437089	-3.41679
SH3BGRL3	0.334897	0.0498809	2.34652	0.0221931	0.437089	-3.41837
ZMAT1	0.431057	-0.0384831	2.3462	0.0222103	0.437089	-3.419
RNF144A	0.27775	0.0758497	2.34574	0.0222359	0.437089	-3.41994
TECRP2	0.229384	0.0479768	2.34573	0.022236	0.437089	-3.41995
OTUD7B	0.29963	0.0632151	2.34464	0.022296	0.437089	-3.42215
STK38L	0.307305	0.0708598	2.34301	0.0223851	0.437089	-3.42542
CFAP54	0.359932	-0.0480879	2.3424	0.0224188	0.437089	-3.42664
MYBPH	0.221915	-0.0131099	2.34174	0.0224551	0.437089	-3.42797
WBP1L	0.334527	0.00360509	2.34118	0.022486	0.437089	-3.42909
PAX9	0.218139	0.0148177	2.34026	0.0225364	0.437089	-3.43092
NEFM	0.243479	0.0086264	2.33964	0.0225708	0.437089	-3.43217
CRIP1P2	0.230946	0.0235568	2.33918	0.0225962	0.437089	-3.43309
PPP2R5B	0.234236	-0.00369074	2.33821	0.0226502	0.437089	-3.43504
TNFRSF11B	0.641575	0.154318	2.33802	0.0226607	0.437089	-3.43542
MTCYBP13	0.204915	-0.00796584	2.33765	0.0226814	0.437089	-3.43617
PLSCR4	0.309652	-0.0658364	2.3372	0.0227064	0.437089	-3.43707
RRAS	0.180732	0.0248407	2.33683	0.022727	0.437089	-3.43781
ADAMTS5	0.292948	0.0529703	2.33596	0.0227755	0.437089	-3.43955
HNRNPMP1	0.229166	-0.0262541	2.33587	0.0227803	0.437089	-3.43973
SH3PXD2B	0.232604	0.0477993	2.33575	0.0227873	0.437089	-3.43998
HYI	0.243381	-0.00298287	2.33562	0.0227941	0.437089	-3.44022
THSD4	0.400711	-0.10767	2.33377	0.0228981	0.437089	-3.44394
MAFA-AS1	0.154721	-0.00824398	2.33332	0.022923	0.437089	-3.44483
USP35	0.158936	0.03586	2.3332	0.02293	0.437089	-3.44508
BPIFA1	0.232393	-0.012884	2.33319	0.0229303	0.437089	-3.44509
DTNA	0.333125	0.0205876	2.33277	0.0229537	0.437089	-3.44592
TTLL7	0.317329	-0.110466	2.33223	0.0229845	0.437089	-3.44702
MGP	0.458189	-0.0296034	2.33181	0.023008	0.437089	-3.44785
SSC5D	0.205822	0.0115163	2.33081	0.0230643	0.437089	-3.44985
PDZD2	0.301945	-0.0731272	2.33029	0.0230937	0.437089	-3.45089
NOX4	0.334336	0.119779	2.33006	0.0231068	0.437089	-3.45136
RASSF5	0.263026	0.00249272	2.32969	0.0231275	0.437089	-3.45209
MT1P1	0.206439	0.037238	2.32921	0.0231547	0.437089	-3.45305
FBXW4	0.220944	-0.0186428	2.3289	0.0231722	0.437089	-3.45367
CGB2	0.247233	-0.0231362	2.32841	0.0232002	0.437138	-3.45465
ACTBL2	0.22833	-0.000586068	2.32635	0.0233173	0.43806	-3.45877
GUCA2B	0.205601	0.0222338	2.32619	0.023326	0.43806	-3.45907
FUT8	0.301668	0.093245	2.326	0.0233371	0.43806	-3.45946
GOLGA8O	0.22859	-0.0731986	2.32567	0.0233559	0.43806	-3.46012
RPL7L1P3	0.252585	0.0305847	2.32557	0.0233615	0.43806	-3.46031
FRZB	0.346174	-0.106018	2.3226	0.0235317	0.439754	-3.46624
PLPPR1	0.285518	0.0395664	2.32256	0.0235336	0.439754	-3.46631
UCP2	0.384143	-0.0564181	2.32254	0.0235349	0.439754	-3.46635
DMWD	0.319002	0.0378707	2.32231	0.0235485	0.439754	-3.46682
CDKN2B-AS1	0.242547	0.0127024	2.32099	0.0236244	0.440222	-3.46945
PABPC1P12	0.182475	-0.0103592	2.32075	0.023638	0.440222	-3.46992
KRT76	0.20107	-0.000455118	2.31884	0.0237484	0.441138	-3.47373
LAIR1	0.258348	-0.00225756	2.31716	0.0238458	0.441955	-3.47707
RXFP1	0.232995	-0.0147454	2.31661	0.0238781	0.441955	-3.47817
SULF2	0.404416	0.0960124	2.31635	0.023893	0.441955	-3.47868
GAP43	0.228728	-0.0261085	2.31563	0.023935	0.442016	-3.48012
RASSF10	0.180805	-0.0317815	2.31547	0.0239441	0.442016	-3.48042
GOLGA2	0.183791	0.00194144	2.31546	0.0239448	0.442016	-3.48045
CCDC106	0.171695	0.00389939	2.31379	0.0240425	0.442687	-3.48377
OR10X1	0.204199	-0.0345102	2.31345	0.0240622	0.442687	-3.48444
TNFRSF10C	0.24228	0.00466475	2.3121	0.0241413	0.443254	-3.48712
ZNF175	0.212523	0.00199132	2.31167	0.024167	0.443254	-3.48799
MSRB3	0.295986	0.0140669	2.31008	0.0242608	0.443673	-3.49115
GAB4	0.195908	-0.0139792	2.3099	0.0242712	0.443673	-3.4915
BTBD16	0.212806	0.0442244	2.30978	0.0242784	0.443673	-3.49174
PARVG	0.252084	-0.00680239	2.3095	0.0242947	0.443674	-3.49228
GPR148	0.180141	0.0305717	2.30856	0.0243504	0.444395	-3.49415
HTRA3	0.211793	-0.0040621	2.30638	0.0244798	0.445199	-3.49848
ALOX5AP	0.376141	0.114211	2.30632	0.0244832	0.445199	-3.49859
ZEB2	0.2385	-0.0126872	2.30599	0.0245029	0.445199	-3.49924
ANO1	0.325626	-0.0384448	2.3053	0.0245439	0.445199	-3.50061
SNORD115-7	0.163685	0.00134991	2.30522	0.024549	0.445199	-3.50078
TBCEL	0.336258	-0.0326073	2.30497	0.0245636	0.445199	-3.50126
DEFB136	0.255214	0.00616168	2.30472	0.0245787	0.445199	-3.50176
ZNF48	0.178913	-0.0662111	2.30406	0.0246183	0.445199	-3.50308
ARRB2	0.251325	0.085525	2.30398	0.0246227	0.445199	-3.50322
VEGFB	0.227117	-0.00286543	2.30248	0.0247127	0.445939	-3.5062
MRC2	0.263734	0.0229089	2.30138	0.0247789	0.446526	-3.50838
TNRC6B	0.272685	-0.0505205	2.30123	0.0247876	0.446526	-3.50866
CDH11	0.278008	0.0816113	2.30015	0.024853	0.44659	-3.51081
GSDMC	0.244055	0.169867	2.29896	0.0249247	0.446816	-3.51316
RARRES1	0.593261	-0.0145154	2.29868	0.0249413	0.446816	-3.5137
SRGAP2B	0.343813	0.0659059	2.29503	0.0251631	0.4496	-3.52092
EGLN2	0.216782	-0.0439672	2.29346	0.0252586	0.450426	-3.524
VCAN	0.524973	0.182518	2.29206	0.0253445	0.451374	-3.52677
SYDE1	0.227257	0.00669624	2.29103	0.0254078	0.451489	-3.5288
C10orf82	0.225107	-0.0473136	2.29099	0.0254103	0.451489	-3.52888
KCNIP3	0.18757	-0.0380266	2.29088	0.0254171	0.451489	-3.5291
ASTN2-AS1	0.170276	-0.0166869	2.29019	0.0254595	0.451826	-3.53045
ITIH3	0.221175	0.028168	2.28786	0.0256033	0.451826	-3.53504
AMER1	0.219803	0.0142095	2.28751	0.0256253	0.451826	-3.53574
S100A9	0.45079	0.0331961	2.28748	0.0256267	0.451826	-3.53578
PCNP	0.184249	-0.00258556	2.28702	0.0256556	0.451903	-3.5367
AP1G2	0.18015	0.0871624	2.28601	0.025718	0.45193	-3.53868
GJA5	0.232533	-0.0237085	2.28574	0.0257351	0.45193	-3.53922
TDRG1	0.225397	-0.00874273	2.28515	0.025772	0.45193	-3.54039
MTND4LP20	0.176653	-0.061146	2.28509	0.0257754	0.45193	-3.5405
LHB	0.143612	-0.0307239	2.28446	0.0258148	0.45193	-3.54174
HPGDS	0.261545	-0.109055	2.28443	0.0258164	0.45193	-3.54179
SFTA3	0.24513	0.0769182	2.2835	0.0258744	0.45193	-3.54361
SERTAD4	0.234612	0.0569069	2.28292	0.0259111	0.45193	-3.54477
HCG4B	0.254478	-0.000934415	2.28285	0.0259152	0.45193	-3.5449
SGCZ	0.18235	-0.0225109	2.28244	0.0259407	0.45193	-3.5457
TNXB	0.241244	0.00248213	2.28206	0.0259644	0.45193	-3.54644
IL25	0.185087	-0.00787898	2.28204	0.0259661	0.45193	-3.54649
TMEM263	0.259898	0.0271335	2.28182	0.0259797	0.45193	-3.54692
GLTP	0.227835	-0.0380968	2.28021	0.0260812	0.452349	-3.55009
TPRKBP1	0.222223	-0.0363007	2.27941	0.0261314	0.452349	-3.55166
IL6	0.59221	-0.0303056	2.27834	0.0261985	0.452349	-3.55374
AQP9	0.417668	0.0761362	2.27812	0.0262126	0.452349	-3.55418
EVL	0.421385	-0.0424673	2.27727	0.0262665	0.452651	-3.55585
PCSK1	0.482497	0.11079	2.27656	0.0263115	0.452651	-3.55724
GRIN2A	0.204786	-0.0418101	2.27607	0.0263428	0.452672	-3.55821
GJA10	0.20023	0.00603192	2.27593	0.0263517	0.452672	-3.55849
WDR19	0.276833	0.131114	2.27471	0.0264288	0.452672	-3.56086
TCEAL4	0.262859	0.00267311	2.27373	0.0264914	0.45333	-3.56279
THAP8	0.226664	0.0182443	2.27338	0.0265137	0.45333	-3.56347
NUP50	0.368612	0.0132749	2.27217	0.0265911	0.454027	-3.56584
MTND5P5	0.402686	-0.124526	2.27182	0.0266135	0.454126	-3.56653
PIAS2	0.45395	-0.0043401	2.27034	0.0267086	0.455464	-3.56942
SSPN	0.535128	0.103398	2.2691	0.0267885	0.456257	-3.57185
RGL3	0.318823	-0.0448862	2.26836	0.0268362	0.456784	-3.5733
ZNF602P	0.199625	0.00405928	2.26753	0.0268896	0.457407	-3.57491
MTND4P26	0.21729	-0.0348551	2.26623	0.0269734	0.457956	-3.57744
IGFBP4	0.220222	0.00821833	2.26548	0.0270225	0.457956	-3.57892
CCL3	0.281328	0.0312895	2.26476	0.027069	0.458176	-3.58032
ZNF280D	0.280973	0.0334209	2.26338	0.0271589	0.459139	-3.58301
SLC24A3	0.273485	0.0613488	2.26337	0.0271595	0.459139	-3.58303
MCAM	0.208981	0.0696351	2.26072	0.0273327	0.460641	-3.58819
INPP5A	0.239394	0.0323364	2.25877	0.0274613	0.461918	-3.592
AOC4P	0.206902	-0.00851971	2.2586	0.0274724	0.461918	-3.59233
F13A1	0.284048	-0.114157	2.25753	0.027543	0.461918	-3.59442
C3AR1	0.399584	0.115399	2.25746	0.0275475	0.461918	-3.59455
SLC39A12	0.202553	-0.0332019	2.25695	0.0275814	0.461918	-3.59555
TMEM184B	0.305513	0.0359234	2.25681	0.0275905	0.461918	-3.59582
SEC24D	0.426963	0.00576586	2.2556	0.0276706	0.462339	-3.59817
SOWAHD	0.216495	0.0224923	2.25488	0.0277186	0.462857	-3.59958
ACTN1	0.335462	0.0681613	2.25251	0.0278758	0.464719	-3.60417
FAM178B	0.203259	-0.014382	2.2525	0.0278769	0.464719	-3.6042
MYADM	0.320084	0.0510179	2.25211	0.027903	0.464801	-3.60496
EBF4	0.21686	-0.0265984	2.25164	0.0279344	0.46504	-3.60587
CYYR1	0.366118	0.0203748	2.2475	0.0282123	0.468238	-3.6139
PRR25	0.235254	-0.0132198	2.24724	0.0282297	0.468242	-3.6144
MAGEA8-AS1	0.221439	-0.0668813	2.2454	0.0283543	0.468886	-3.61798
MAMLD1	0.217168	-0.023666	2.24428	0.0284301	0.469122	-3.62014
PGBD1	0.211778	0.00626383	2.24422	0.0284339	0.469122	-3.62025
CCDC144NL-AS1	0.233743	0.0151147	2.24351	0.0284827	0.469122	-3.62164
LIN7A	0.262867	-0.0669261	2.24337	0.0284922	0.469122	-3.62191
MYO3A	0.197454	0.00641777	2.24233	0.0285626	0.469122	-3.62391
RETNLB	0.439436	-0.122624	2.24215	0.0285748	0.469122	-3.62426
ADAMTSL1	0.168182	-0.0633986	2.24124	0.028637	0.46986	-3.62602
GLDN	0.249544	0.0145998	2.23982	0.028734	0.470601	-3.62876
SYT14	0.179695	-0.0130418	2.23912	0.0287824	0.470601	-3.63013
ASH1L-IT1	0.173351	0.00851752	2.23857	0.02882	0.470601	-3.63119
DIXDC1	0.203726	-0.0174307	2.23764	0.0288844	0.470677	-3.633
ATP10D	0.388552	0.0529343	2.2376	0.0288872	0.470677	-3.63307
TRIM62	0.189022	-0.00103015	2.2375	0.0288937	0.470677	-3.63326
PPP4R1	0.350145	-0.0455171	2.23372	0.0291549	0.473541	-3.64055
CEP126	0.21446	-0.0232624	2.23358	0.029165	0.473541	-3.64083
BRD7P6	0.160198	-0.0390896	2.23316	0.029194	0.473541	-3.64163
C3orf70	0.226531	-0.00741582	2.23058	0.0293736	0.474995	-3.6466
B3GALT4	0.243882	-0.0658101	2.22688	0.0296334	0.477545	-3.65373
PRIMA1	0.186738	0.0107639	2.22668	0.0296476	0.477545	-3.65412
ST8SIA1	0.25726	-0.0175575	2.22383	0.029849	0.479486	-3.6596
DCST2	0.22866	0.00646967	2.22374	0.0298556	0.479486	-3.65978
ASMTL	0.207951	-0.00395268	2.22291	0.0299142	0.479563	-3.66137
TMEM159	0.220529	-0.038956	2.22184	0.0299902	0.479563	-3.66342
FIBCD1	0.236633	-0.00289245	2.22165	0.0300035	0.479563	-3.66378
BMP6	0.257098	-0.0274779	2.2207	0.0300715	0.479563	-3.66561
MAP9	0.196677	-0.0722321	2.21939	0.030165	0.480774	-3.66813
GOLGA8Q	0.253653	-0.106235	2.21899	0.0301934	0.480946	-3.66889
PRICKLE1	0.175747	0.000766922	2.21829	0.0302442	0.481078	-3.67025
DBR1	0.238508	0.0416254	2.21824	0.0302476	0.481078	-3.67034
LIMS2	0.244984	0.0481648	2.21711	0.0303286	0.481078	-3.6725
VTRNA1-1	0.354638	-0.00696032	2.21685	0.0303473	0.481078	-3.673
MED9	0.185498	0.0821529	2.21642	0.0303779	0.481078	-3.67382
GOLGA8N	0.41464	-0.0809967	2.21566	0.0304332	0.481116	-3.67529
GPR4	0.253096	0.0101511	2.21479	0.0304958	0.481575	-3.67695
GLULP3	0.312393	0.105373	2.21456	0.0305122	0.481575	-3.67738
PPP1R3C	0.194303	0.0489866	2.21348	0.0305903	0.482204	-3.67945
ECM1	0.295803	0.0121145	2.2132	0.0306105	0.482244	-3.67998
CREB3L1	0.318421	-0.0235177	2.21263	0.030652	0.482619	-3.68108
NCOA1	0.270883	-0.0292778	2.21181	0.0307117	0.483001	-3.68265
RPS16P5	0.255958	-0.0379798	2.2095	0.0308798	0.48425	-3.68706
FOXN3P1	0.229535	0.0147835	2.20904	0.030914	0.484433	-3.68796
CFAP44-AS1	0.163218	0.0128161	2.20886	0.0309269	0.484433	-3.6883
IER2	0.299203	-0.0197518	2.2083	0.0309679	0.484798	-3.68937
KANSL1L	0.408548	0.122514	2.20739	0.0310347	0.485086	-3.69111
ST6GALNAC6	0.203636	0.000139452	2.20581	0.0311505	0.485086	-3.69412
ZNF391	0.212044	0.0419607	2.20509	0.0312039	0.485086	-3.6955
SSH1	0.210873	-0.000629113	2.20457	0.0312416	0.485086	-3.69648
RBFA	0.208295	0.0288739	2.20292	0.0313641	0.485086	-3.69964
RAD51-AS1	0.228763	-0.0542205	2.20134	0.0314812	0.485086	-3.70265
ACP5	0.258632	0.00856294	2.20117	0.0314937	0.485086	-3.70297
SCARNA15	0.20914	0.0126346	2.20099	0.0315072	0.485086	-3.70332
VTI1BP4	0.203154	-0.0235489	2.20071	0.0315276	0.485086	-3.70384
KLHL2	0.282845	0.0926345	2.20035	0.0315547	0.485086	-3.70454
IGFBP5	0.353431	0.0983635	2.20035	0.031555	0.485086	-3.70454
SLC4A1APP2	0.230059	-0.0308026	2.19948	0.0316196	0.485533	-3.70619
CTSL3P	0.182018	-0.00247062	2.19881	0.0316692	0.485624	-3.70746
CACNA1C-AS3	0.208102	0.015679	2.19757	0.0317624	0.486359	-3.70983
EPC2	0.224649	-0.0250259	2.19687	0.0318145	0.486707	-3.71116
CD37	0.271427	0.0653585	2.19599	0.0318805	0.486712	-3.71283
AKR1B1P8	0.192882	0.0349941	2.19583	0.0318925	0.486712	-3.71313
HOXB3	0.420647	-0.0198906	2.19472	0.0319764	0.487302	-3.71525
ACVR2A	0.241176	0.0766302	2.19442	0.031999	0.487302	-3.71582
TRIM51HP	0.19386	-0.0432767	2.19367	0.0320554	0.487835	-3.71724
VTRNA1-3	0.362367	8.57421e-05	2.19268	0.03213	0.487855	-3.71912
ENTPD1	0.222054	0.0584999	2.19247	0.032146	0.487855	-3.71952
TRIM72	0.196199	0.00858605	2.19179	0.0321975	0.488093	-3.72082
SETP12	0.188726	-0.0111327	2.19142	0.0322256	0.48813	-3.72152
KCNMA1	0.246495	0.0334856	2.19119	0.032243	0.48813	-3.72195
TRDJ3	0.219784	-0.0136567	2.18875	0.0324286	0.48813	-3.72659
SNORD114-3	0.270653	-0.0975593	2.18858	0.0324412	0.48813	-3.7269
DUSP22	0.134714	-0.00495771	2.18826	0.0324657	0.48813	-3.72751
MAB21L2	0.473807	0.080735	2.18823	0.0324681	0.48813	-3.72757
NLRC4	0.229969	0.0495819	2.18713	0.0325522	0.488824	-3.72965
WNT5A	0.314095	0.0493258	2.18654	0.0325974	0.488824	-3.73078
KCNA1	0.274812	0.0355454	2.18622	0.0326218	0.488824	-3.73138
WHAMMP1	0.261398	-0.00517334	2.18512	0.0327065	0.488923	-3.73347
LRRC8C	0.26543	-0.00394853	2.18499	0.0327165	0.488923	-3.73372
PCBP4	0.183445	0.0518053	2.18497	0.0327178	0.488923	-3.73375
OR52N1	0.169755	-0.0210782	2.18405	0.0327884	0.48933	-3.73549
WBP1LP3	0.212017	0.00957429	2.18403	0.0327898	0.48933	-3.73552
CTSC	0.310054	0.00200422	2.18345	0.0328346	0.48933	-3.73662
ZSCAN26	0.259549	-0.0573122	2.18345	0.0328347	0.48933	-3.73662
ZDBF2	0.379637	-0.024262	2.18308	0.0328631	0.489486	-3.73732
CYBB	0.264399	-0.000658601	2.18203	0.0329442	0.489805	-3.73931
FAM174A	0.231512	-0.0181127	2.182	0.0329465	0.489805	-3.73937
SPATA5	0.261338	0.0655222	2.1819	0.0329543	0.489805	-3.73956
EIF5A2	0.284079	0.0586391	2.18166	0.0329728	0.489805	-3.74001
C2orf91	0.189187	-0.0482238	2.17824	0.0332388	0.490768	-3.74648
HIVEP2	0.293024	-0.164103	2.17815	0.0332456	0.490768	-3.74665
PRSS2	0.479056	0.12916	2.17803	0.0332548	0.490768	-3.74687
ANKRD44	0.301405	-0.0366464	2.1766	0.0333662	0.49156	-3.74957
PLD1	0.283273	0.0394807	2.17621	0.0333966	0.49156	-3.7503
MCC	0.255074	-0.00269584	2.17547	0.0334546	0.492121	-3.7517
VSIG10L	0.252976	0.0352253	2.17507	0.0334867	0.492252	-3.75247
DSE	0.321937	0.079459	2.17489	0.0335003	0.492252	-3.7528
C9orf40	0.191732	0.0108868	2.17467	0.0335176	0.492252	-3.75321
NKX1-1	0.219935	-0.00736911	2.17395	0.0335739	0.492549	-3.75457
OR4F7P	0.248723	-0.00101391	2.17294	0.0336536	0.492927	-3.75648
ARID5A	0.197188	-0.00666867	2.17258	0.033682	0.492927	-3.75716
PGLYRP4	0.223666	-0.0315552	2.17102	0.0338051	0.494026	-3.76009
AVPR1A	0.235956	-0.0133625	2.17089	0.0338158	0.494026	-3.76035
GJB2	0.414248	0.19829	2.16947	0.0339276	0.494026	-3.76301
DLL4	0.216102	0.0527069	2.16941	0.0339325	0.494026	-3.76312
SYNPO	0.201738	-0.00337621	2.16941	0.0339326	0.494026	-3.76312
MRPS16P2	0.18686	-0.03932	2.16912	0.033956	0.494026	-3.76368
SHC1	0.28665	0.0462514	2.16911	0.0339567	0.494026	-3.7637
MTCYBP14	0.183316	-0.00374317	2.16902	0.033964	0.494026	-3.76387
CHMP1B	0.231187	0.0163084	2.16854	0.0340019	0.494314	-3.76477
KCNMB1	0.205344	0.0535791	2.16776	0.0340635	0.494681	-3.76622
SLC25A30-AS1	0.172792	0.010338	2.16667	0.0341511	0.49569	-3.76829
THSD1	0.251789	-0.000311116	2.16536	0.0342554	0.495886	-3.77075
C19orf84	0.183638	0.00262251	2.16489	0.0342931	0.496083	-3.77163
NT5C3AP1	0.201642	0.00726155	2.16473	0.0343054	0.496083	-3.77192
UBE2Q2P9	0.209542	-0.0183414	2.16325	0.0344248	0.496765	-3.77472
DNAJB5	0.229522	-0.0075679	2.1623	0.0345012	0.496765	-3.7765
SH3PXD2A	0.239585	-0.066758	2.16192	0.0345316	0.496765	-3.77721
RBP4	0.258549	0.0208599	2.16186	0.0345365	0.496765	-3.77732
GOLGA8T	0.198411	-0.0276927	2.16137	0.0345759	0.496765	-3.77824
AP1S2	0.252276	0.0761767	2.16117	0.0345916	0.496765	-3.77861
DUSP10	0.366286	0.0978013	2.16117	0.0345918	0.496765	-3.77861
C1orf198	0.246427	0.0774503	2.16077	0.0346246	0.496765	-3.77937
PIN1	0.197795	-0.0166049	2.15923	0.0347491	0.497754	-3.78226
LMO7-AS1	0.340814	0.0665092	2.15897	0.0347695	0.497786	-3.78273
WASF5P	0.19329	0.011093	2.1584	0.034816	0.497969	-3.78381
WFDC10B	0.228543	0.0270868	2.15837	0.0348188	0.497969	-3.78387
KCNC2	0.199419	-0.0186491	2.15807	0.0348429	0.498053	-3.78443
ADORA2A-AS1	0.153819	-0.0429438	2.15563	0.0350411	0.500023	-3.78899
P3H4	0.220245	0.0105008	2.15377	0.0351935	0.501117	-3.79248
AMIGO3	0.183553	0.00288521	2.15278	0.0352743	0.501117	-3.79432
ULK4P3	0.310347	0.074263	2.15111	0.035412	0.50143	-3.79745
FBP2	0.218067	0.00408688	2.1511	0.0354126	0.50143	-3.79747
FAM157A	0.22609	0.0356051	2.15033	0.0354764	0.50143	-3.79892
FCGR2A	0.400288	0.131535	2.15008	0.0354969	0.50143	-3.79938
GLUL	0.36802	0.0781061	2.14998	0.0355051	0.50143	-3.79957
PCDH17	0.250429	0.0906276	2.14966	0.0355317	0.50143	-3.80017
THRB-AS1	0.18942	-0.0486942	2.14958	0.0355383	0.50143	-3.80032
RBFOX2	0.239803	0.0606494	2.14916	0.0355724	0.5016	-3.80109
ALPK2	0.224447	0.026965	2.14823	0.0356502	0.501712	-3.80284
EPYC	0.533408	0.18696	2.14798	0.0356707	0.501741	-3.8033
EMX2OS	0.178362	0.023792	2.14724	0.0357322	0.502348	-3.80469
CASP8	0.304532	0.000341927	2.14543	0.0358823	0.504199	-3.80806
XGY2	0.536615	0.0642885	2.14441	0.0359677	0.504682	-3.80997
ACTG2	0.234584	-0.0143962	2.14368	0.0360282	0.50521	-3.81132
UAP1L1	0.174079	0.018182	2.14299	0.0360863	0.505643	-3.81261
TM6SF1	0.230978	0.0259743	2.14083	0.0362671	0.507257	-3.81662
PPFIBP1	0.245163	0.0853849	2.13845	0.0364683	0.509271	-3.82106
GLIPR2	0.222319	-0.00456937	2.13381	0.0368622	0.510998	-3.82968
SPINK6	0.201085	0.0255002	2.1337	0.0368715	0.510998	-3.82989
OR7C1	0.173005	0.00357012	2.13286	0.0369431	0.511181	-3.83144
UBR1	0.268026	-0.046861	2.13208	0.0370094	0.511181	-3.83288
E4F1	0.186683	-0.00474017	2.13116	0.0370884	0.511181	-3.83459
C16orf71	0.203128	0.0317678	2.13003	0.0371854	0.511196	-3.83669
MAN2B1	0.2075	0.0807787	2.12914	0.0372618	0.511257	-3.83833
CTF2P	0.18418	0.0665508	2.12881	0.0372901	0.511257	-3.83894
IFI16	0.476657	-0.01017	2.12858	0.0373104	0.511257	-3.83938
COL2A1	0.198642	0.0568835	2.12792	0.0373674	0.511257	-3.8406
FLYWCH2	0.13306	-0.0189974	2.12759	0.0373958	0.511257	-3.84121
FIGN	0.200576	-0.0402457	2.12609	0.0375253	0.511524	-3.84398
KCNQ5-IT1	0.208336	0.0477075	2.12589	0.0375423	0.511524	-3.84435
PODXL	0.228087	0.0722166	2.12518	0.037604	0.511524	-3.84566
PEG3	0.209986	0.00102841	2.12511	0.03761	0.511524	-3.84579
FLRT2	0.299324	0.0664909	2.12498	0.0376214	0.511524	-3.84603
TMEM47	0.280674	0.0677225	2.12437	0.0376749	0.511996	-3.84717
IL1R1	0.237821	-0.00799382	2.12298	0.0377959	0.512648	-3.84974
DCLK1	0.319542	-0.20214	2.1229	0.0378027	0.512648	-3.84989
ITGB7	0.241758	0.0215119	2.12274	0.0378164	0.512648	-3.85018
SLC36A1	0.224278	-0.0164739	2.12274	0.0378168	0.512648	-3.85018
PFN4	0.196965	-0.0198725	2.12011	0.0380463	0.513752	-3.85503
AXL	0.242827	0.00227787	2.11966	0.0380858	0.513752	-3.85586
RGS9	0.210344	-0.0438899	2.11826	0.0382088	0.513752	-3.85845
SERPINA3	0.228005	-0.0335741	2.11803	0.0382295	0.513752	-3.85888
CLCA1	0.872476	-0.418709	2.11799	0.0382331	0.513752	-3.85896
RLBP1	0.185855	-0.0514047	2.11736	0.0382881	0.513752	-3.86011
TMEM26	0.186273	-0.00474547	2.11639	0.0383743	0.513752	-3.86191
RHOB	0.24133	-0.023704	2.11627	0.0383842	0.513752	-3.86211
DLC1	0.240579	0.0121247	2.11584	0.0384228	0.513752	-3.86292
AKT3	0.304618	0.0802971	2.11489	0.0385065	0.513752	-3.86466
MEIS2	0.399492	0.129405	2.11483	0.0385121	0.513752	-3.86478
CUEDC2	0.190111	0.0295942	2.11442	0.0385485	0.513752	-3.86553
SLC2A5	0.287793	-0.0481698	2.11436	0.0385536	0.513752	-3.86564
RPL10L	0.272325	-0.11448	2.11425	0.038563	0.513752	-3.86584
NEB	0.277297	-0.0973924	2.11425	0.0385635	0.513752	-3.86584
EMC7	0.19858	-0.019125	2.11391	0.0385932	0.513752	-3.86646
FCGR3A	0.362477	0.167281	2.11319	0.0386576	0.513841	-3.8678
GTF2H1	0.260137	0.00736667	2.11161	0.0387978	0.513901	-3.8707
NBPF1	0.178709	0.0496666	2.11141	0.0388162	0.513901	-3.87107
TTBK2	0.302688	0.0532219	2.11109	0.0388445	0.513901	-3.87166
ADAMTSL3	0.173047	-0.071778	2.11083	0.0388681	0.513901	-3.87214
KRTAP4-1	0.196704	-0.00232335	2.11063	0.0388857	0.513901	-3.87251
CACNB2	0.185593	-0.049218	2.11034	0.0389116	0.513901	-3.87304
DHRS4L2	0.151404	0.0106514	2.11018	0.0389256	0.513901	-3.87333
CDC42BPA	0.284651	-0.0265528	2.10906	0.039026	0.51448	-3.87539
CDH2	0.254289	-0.00198037	2.10853	0.0390741	0.514616	-3.87637
IRAK2	0.269158	0.0546024	2.10812	0.0391108	0.514773	-3.87712
MORF4L1P1	0.355246	-0.000734804	2.10754	0.0391626	0.514773	-3.87818
GULP1	0.487803	0.0426935	2.10456	0.0394309	0.515825	-3.88365
CHIAP1	0.141944	-0.032836	2.1042	0.039464	0.515825	-3.88432
SMC5-AS1	0.172648	0.0275242	2.10382	0.0394979	0.515825	-3.885
IQCA1	0.19294	-0.00207653	2.10291	0.0395812	0.515825	-3.88669
ZNF861P	0.230722	-0.050006	2.1028	0.0395906	0.515825	-3.88688
HCK	0.221983	0.0759555	2.10278	0.0395929	0.515825	-3.88693
CLCN1	0.189228	0.0517795	2.10248	0.0396198	0.515825	-3.88747
KCNB1	0.203296	0.00835829	2.10216	0.0396487	0.515825	-3.88805
METTL7A	0.167427	-0.0990781	2.10208	0.0396558	0.515825	-3.88819
MFHAS1	0.318812	0.0179585	2.10136	0.0397214	0.515825	-3.88952
OR7E47P	0.183684	-0.0337374	2.09968	0.0398746	0.516404	-3.89259
BNIP3L	0.317259	0.0678727	2.09965	0.0398778	0.516404	-3.89266
CNTNAP3P2	0.337375	-0.0809285	2.09856	0.0399769	0.516892	-3.89464
SETP20	0.165071	-0.010786	2.0982	0.0400103	0.516892	-3.89531
ACTBP14	0.207527	0.0382464	2.09806	0.040023	0.516892	-3.89556
TRBV6-5	0.178805	0.0620305	2.09767	0.0400586	0.517106	-3.89627
IGFL1P1	0.313212	0.0129012	2.09687	0.0401323	0.517568	-3.89774
SNORD89	0.266157	0.0576497	2.09476	0.0403268	0.519082	-3.9016
EIF1AXP2	0.180836	-0.0429597	2.09424	0.0403743	0.519082	-3.90255
CSRP3	0.198554	-0.0199119	2.09233	0.040551	0.519798	-3.90603
STK10	0.424588	0.0335155	2.09231	0.0405527	0.519798	-3.90607
RAB4B	0.149152	-0.00761229	2.09177	0.0406025	0.520192	-3.90705
PLEKHH2	0.459903	-0.165173	2.09063	0.0407087	0.520958	-3.90913
TMEM91	0.211628	0.0471926	2.09032	0.040738	0.520958	-3.90971
CTAGE7P	0.172325	0.0440431	2.0901	0.0407577	0.520958	-3.91009
FRMD8P1	0.187897	-0.0514149	2.08931	0.0408314	0.5212	-3.91154
IGKV1D-35	0.23596	-0.0863215	2.08929	0.0408339	0.5212	-3.91159
PIP4K2A	0.309233	0.0360494	2.08884	0.0408759	0.521275	-3.91241
HDAC5	0.25486	0.0687915	2.08777	0.0409755	0.521788	-3.91435
ZNF557	0.162486	-0.0248318	2.08743	0.0410069	0.521792	-3.91496
HIF1A	0.560171	0.121957	2.08733	0.041017	0.521792	-3.91516
ST13P16	0.18683	0.0266061	2.08449	0.0412834	0.521792	-3.92033
PADI4	0.224622	0.021768	2.08424	0.041307	0.521792	-3.92078
PRKG1	0.332327	-0.0290885	2.08401	0.0413283	0.521792	-3.92119
SCN11A	0.175873	0.0130115	2.08335	0.0413903	0.521792	-3.92239
CDK18	0.192476	-0.0475418	2.08238	0.0414826	0.521792	-3.92417
TSPYL4	0.21515	0.0387186	2.08175	0.041542	0.521792	-3.92531
TSPY2	0.155754	-0.0119633	2.08167	0.0415492	0.521792	-3.92545
GGT5	0.185139	-0.0204564	2.08141	0.0415745	0.521856	-3.92593
SLC22A12	0.16537	0.0307723	2.08121	0.0415925	0.521856	-3.92628
C16orf74	0.228765	-0.0237318	2.08061	0.0416495	0.522091	-3.92737
RNF7	0.18705	-0.0368535	2.08007	0.0417014	0.522138	-3.92836
PCAT19	0.138124	0.0331568	2.07997	0.0417106	0.522138	-3.92854
WWC2-AS2	0.225895	0.0112981	2.07975	0.0417314	0.522158	-3.92894
RANBP20P	0.234781	0.0568124	2.07884	0.0418182	0.52223	-3.93059
HMGN2P19	0.187103	-0.00774586	2.07732	0.041963	0.523139	-3.93335
HMCN1	0.236764	0.0135175	2.07705	0.0419884	0.523217	-3.93383
DLG3-AS1	0.147182	-0.00947598	2.07628	0.0420623	0.523581	-3.93524
SIRT3	0.162554	0.0179541	2.07615	0.0420752	0.523581	-3.93548
MIAT	0.195156	0.000471455	2.07395	0.0422853	0.525	-3.93945
CDY3P	0.277885	0.0406739	2.07279	0.0423972	0.525384	-3.94156
NCF2	0.239923	0.15609	2.07263	0.042413	0.525384	-3.94186
SLC25A39P2	0.177037	0.0134665	2.07234	0.0424405	0.525384	-3.94237
WHAMMP3	0.283962	0.0440551	2.07137	0.0425341	0.525535	-3.94413
ELL	0.176759	-0.0581578	2.07085	0.0425847	0.525752	-3.94508
AFF3	0.379049	-0.227839	2.07073	0.0425963	0.525752	-3.94529
TTC39C-AS1	0.176901	-0.0309418	2.0704	0.0426281	0.525907	-3.94589
ARSB	0.246858	0.0289979	2.06934	0.0427311	0.526493	-3.94781
BCAT1	0.310464	0.119363	2.06931	0.0427334	0.526493	-3.94785
RPS12P5	0.18588	-0.0536466	2.06907	0.0427571	0.526547	-3.94829
DYRK3	0.270341	0.0397766	2.06857	0.0428057	0.526908	-3.9492
GABARAPL1	0.496445	0.0201571	2.06787	0.0428736	0.527506	-3.95046
NNMT	0.27384	0.0937776	2.06728	0.0429312	0.527939	-3.95153
TLE4	0.293877	-0.0434324	2.06707	0.0429512	0.527939	-3.9519
ATG14	0.221676	0.0735664	2.06691	0.0429669	0.527939	-3.95219
CKAP4	0.183142	-0.0230187	2.06609	0.0430469	0.528333	-3.95368
MTUS1	0.238721	-0.00515971	2.06599	0.043057	0.528333	-3.95386
NRG2	0.171414	0.000539737	2.06558	0.0430965	0.528581	-3.95459
KLK12	0.247086	0.0564251	2.06498	0.0431549	0.528651	-3.95567
LCA5	0.205803	-0.0633008	2.06492	0.0431613	0.528651	-3.95579
M1AP	0.200977	-0.00933808	2.06407	0.0432444	0.528868	-3.95732
CD300A	0.27816	0.0328309	2.0636	0.0432907	0.529062	-3.95817
BMS1P16	0.193442	0.0743262	2.06263	0.0433853	0.529743	-3.95991
RPS6KA2	0.198506	-0.00178216	2.0611	0.0435365	0.531115	-3.96268
VPS26BP1	0.278452	0.0194998	2.05936	0.0437076	0.531856	-3.9658
GLRX	0.243191	0.0416091	2.05827	0.0438163	0.531856	-3.96778
ZNF295-AS1	0.211481	-0.00575198	2.05808	0.043835	0.531856	-3.96812
MGAT4C	0.155272	-0.0702542	2.05758	0.0438842	0.531856	-3.96901
OXCT1	0.289575	0.026417	2.05745	0.0438971	0.531856	-3.96924
SLC5A4P1	0.158289	-0.0411186	2.05736	0.0439064	0.531856	-3.96941
PATE2	0.203707	-0.00849984	2.05635	0.0440063	0.532051	-3.97122
KCNG2	0.195708	0.0684335	2.05627	0.0440146	0.532051	-3.97137
RIMKLA	0.200185	0.0171018	2.05599	0.044042	0.532051	-3.97187
CCL5	0.363895	-0.000778123	2.0555	0.0440911	0.532409	-3.97275
SGK1	0.394095	-0.150031	2.0538	0.0442611	0.533893	-3.97581
SEC61A1	0.242579	0.0630786	2.05224	0.0444172	0.534841	-3.97861
TFF3	0.378442	0.0251346	2.05211	0.0444297	0.534841	-3.97884
RHOQP2	0.188752	-0.00480174	2.05112	0.0445293	0.535183	-3.98062
TCEAL7	0.156334	-0.00676865	2.05086	0.0445561	0.535183	-3.9811
PLA2G2F	0.206985	0.0267112	2.05023	0.0446192	0.535443	-3.98222
DOC2B	0.231431	0.0395484	2.04987	0.0446553	0.535443	-3.98286
HAUS6P2	0.225371	0.0245907	2.04882	0.0447618	0.535767	-3.98476
GMIP	0.208676	0.0366602	2.04693	0.0449528	0.536792	-3.98814
FTH1P24	0.136495	0.00720065	2.04684	0.0449616	0.536792	-3.9883
TINCR	0.178628	-0.0332083	2.04507	0.0451407	0.536792	-3.99146
S100A8	0.514322	0.159722	2.04488	0.0451604	0.536792	-3.9918
FCRL5	0.18176	-0.100058	2.04484	0.0451648	0.536792	-3.99188
JUND	0.234864	-0.059407	2.04481	0.0451673	0.536792	-3.99192
CCND2-AS1	0.169932	-0.0321911	2.04366	0.0452844	0.537079	-3.99398
GIMAP1-GIMAP5	0.182381	-0.0500684	2.04285	0.0453674	0.537596	-3.99544
INSR	0.162155	0.000684386	2.04122	0.0455342	0.538854	-3.99835
IAPP	0.193482	-0.00231213	2.04104	0.0455525	0.538854	-3.99867
ZNF423	0.200962	0.000593334	2.04045	0.0456134	0.539155	-3.99973
BMS1P15	0.222808	0.0352867	2.0404	0.0456182	0.539155	-3.99981
PCDHB16	0.254751	-0.0274948	2.03987	0.0456727	0.539155	-4.00076
GXYLT1	0.212307	0.0554543	2.03698	0.0459705	0.54101	-4.00592
FGF12-AS1	0.158036	-0.018435	2.03681	0.0459875	0.54101	-4.00622
TTTY5	0.22177	0.073139	2.03535	0.0461387	0.541934	-4.00882
GFAP	0.174892	0.0568645	2.03531	0.0461437	0.541934	-4.00891
STRADA	0.272194	0.0697339	2.03524	0.0461503	0.541934	-4.00902
CDY14P	0.232087	-0.00964229	2.03441	0.0462362	0.542125	-4.0105
ATF7IP	0.271889	0.0430139	2.03376	0.0463046	0.542125	-4.01167
LETM1P2	0.202859	-0.0573582	2.03365	0.0463152	0.542125	-4.01185
GAD1	0.154571	0.0112566	2.03299	0.0463843	0.542125	-4.01303
TUSC7	0.197146	-0.0299757	2.03226	0.0464607	0.542125	-4.01434
KCNA2	0.269766	-0.0587812	2.03223	0.0464637	0.542125	-4.01439
OR7E83P	0.151288	0.0155313	2.03222	0.0464645	0.542125	-4.0144
GRB2	0.195717	0.0674129	2.0306	0.0466339	0.542943	-4.01729
KDR	0.216614	0.022413	2.03042	0.0466527	0.542943	-4.01761
BACE1	0.227352	-0.0219921	2.03039	0.0466552	0.542943	-4.01765
FAM193B	0.214565	0.0158307	2.02949	0.0467497	0.543132	-4.01926
TSPYL2	0.218904	-0.0435737	2.02825	0.0468795	0.544295	-4.02146
CCNI	0.310548	0.00548227	2.02705	0.0470057	0.544908	-4.02359
SNORD114-30	0.268858	-0.0503617	2.02547	0.0471726	0.545723	-4.0264
CNOT2	0.256312	0.0792	2.02504	0.0472177	0.545945	-4.02716
LRP1	0.294481	-0.0108791	2.02393	0.0473353	0.545981	-4.02913
SSBP2	0.200745	-0.10529	2.02375	0.0473549	0.545981	-4.02946
PRCP	0.412145	0.0480776	2.0234	0.0473915	0.546172	-4.03007
OR2J2	0.183243	-0.0511317	2.02302	0.0474318	0.546407	-4.03074
TRBV5-3	0.175645	-0.031473	2.0227	0.0474656	0.546565	-4.03131
ERG	0.204061	0.00632633	2.0225	0.0474879	0.546591	-4.03168
UBA7	0.265331	-0.00555737	2.02217	0.0475228	0.546762	-4.03226
SLC26A1	0.211019	0.00508313	2.02122	0.0476236	0.54697	-4.03394
SNORD74	0.328999	-0.103119	2.02072	0.0476771	0.54697	-4.03483
FKBP9P1	0.21798	0.0729256	2.02059	0.0476908	0.54697	-4.03506
GNG11	0.320279	-0.0190949	2.02016	0.0477364	0.54697	-4.03582
SLAMF8	0.23578	0.0980912	2.01869	0.047894	0.547488	-4.03843
ZNF79	0.216777	0.0253414	2.01848	0.047916	0.547488	-4.03879
MTND5P35	0.189297	-0.01917	2.01828	0.0479375	0.547488	-4.03915
NKX6-3	0.164403	0.0183266	2.0181	0.047957	0.547488	-4.03947
KCNK2	0.175507	0.00756161	2.01808	0.0479585	0.547488	-4.03949
TNIP2	0.198826	-0.074894	2.01737	0.0480353	0.547811	-4.04076
NTF3	0.210047	-0.00429095	2.01683	0.048093	0.548008	-4.04171
AP2B1	0.292674	-0.0330991	2.01665	0.0481127	0.548008	-4.04204
TRAJ55	0.146319	-0.01983	2.01559	0.0482266	0.548618	-4.04391
LRRC15	0.244519	0.177605	2.01323	0.0484808	0.549905	-4.04807
TRIM8	0.183374	0.0177874	2.01257	0.0485525	0.55049	-4.04924
A4GALT	0.274147	-0.0378657	2.0122	0.0485925	0.550715	-4.04989
TAGAP	0.169873	-0.0161734	2.01163	0.0486544	0.550784	-4.0509
VPS39	0.237995	-0.0372925	2.01154	0.0486645	0.550784	-4.05106
TRPC1	0.290328	-0.0575338	2.0114	0.0486793	0.550784	-4.0513
A2M	0.406589	-0.0208354	2.00978	0.0488556	0.551753	-4.05416
ADGRF5	0.372767	0.0736755	2.00866	0.0489775	0.551938	-4.05614
CCDC30	0.18472	-0.0272386	2.00865	0.0489781	0.551938	-4.05615
HEPACAM2	0.454515	-0.162133	2.00785	0.0490661	0.552369	-4.05757
HCG4P3	0.217696	-0.0350518	2.00755	0.0490989	0.552369	-4.05809
CCR3	0.154388	0.00270923	2.00753	0.0491012	0.552369	-4.05813
VPS25P1	0.190791	0.00142134	2.00665	0.0491973	0.552447	-4.05968
MTMR1	0.197454	-0.0301789	2.00632	0.0492335	0.552475	-4.06026
NCKAP5L	0.177075	-0.0183323	2.00555	0.0493175	0.552686	-4.06161
PAF1	0.144194	-0.0187978	2.00499	0.0493788	0.552686	-4.06259
HMGN1P9	0.201464	0.0358139	2.00496	0.0493828	0.552686	-4.06266
VWDE	0.163783	-0.0136225	2.00467	0.0494142	0.552686	-4.06316
AQP3	0.292697	0.106294	2.00352	0.0495413	0.553305	-4.06519
FRMD6-AS1	0.159428	-0.0047723	2.00229	0.0496771	0.553497	-4.06735
TRIP4	0.193955	-0.0222697	2.0022	0.0496866	0.553497	-4.0675
ATCAY	0.18128	0.0229102	2.00202	0.049706	0.553497	-4.06781
MEIS1	0.340316	0.040407	2.00198	0.0497108	0.553497	-4.06789
ANKRD6	0.275783	0.0172006	2.00153	0.0497605	0.553497	-4.06868
LRCH2	0.190101	-0.0246458	2.00123	0.0497934	0.553497	-4.0692
APP	0.228501	0.0197663	2.00091	0.0498294	0.553497	-4.06977
ANKRD33	0.17782	0.0379601	2.00089	0.0498313	0.553497	-4.0698
C12orf71	0.1439	0.00928508	2.00032	0.0498943	0.553506	-4.0708
SLC36A4	0.239692	-0.0223345	2.00026	0.0499011	0.553506	-4.07091
GLTPP1	0.145546	-0.0263316	1.99978	0.049955	0.553519	-4.07176
PTTG1IP	0.230768	0.091722	1.99884	0.0500583	0.554214	-4.0734
DPF3	0.190121	-0.067819	1.99856	0.05009	0.55434	-4.0739
SFTPC	0.176644	0.046485	1.99783	0.0501709	0.554808	-4.07517
ACTG1P20	0.204194	0.0388537	1.99723	0.0502386	0.55502	-4.07624
RPL21P33	0.178642	0.0113983	1.9971	0.0502531	0.55502	-4.07646
TBC1D1	0.270989	0.0388381	1.99651	0.0503186	0.55508	-4.07749
TNFRSF14	0.223114	-0.00135009	1.99608	0.0503659	0.55508	-4.07824
IRX1	0.214634	0.0211295	1.99416	0.0505819	0.556482	-4.08162
KIAA2026	0.212634	-0.0592519	1.99409	0.0505892	0.556482	-4.08173
PTPRQ	0.193067	-0.080838	1.99386	0.050615	0.55654	-4.08213
C7	0.207934	-0.100209	1.99292	0.0507205	0.557202	-4.08378
CCDC60	0.186044	-0.0309473	1.99253	0.0507643	0.557202	-4.08446
ACO1	0.283084	0.0183448	1.99205	0.050818	0.557202	-4.08529
AOC2	0.184501	0.073549	1.99111	0.0509249	0.557579	-4.08695
ARHGAP28	0.191288	-0.0702522	1.99075	0.0509646	0.557579	-4.08757
ZNF385D-AS2	0.201001	0.0477628	1.9906	0.0509823	0.557579	-4.08784
BNIP3P29	0.234607	0.0530912	1.99042	0.0510027	0.557579	-4.08816
BHLHE40-AS1	0.173379	0.012781	1.9904	0.0510051	0.557579	-4.08819
RMDN2	0.198381	-0.142265	1.9895	0.0511065	0.557598	-4.08976
LPAR1	0.305297	-0.103138	1.98892	0.0511721	0.557598	-4.09077
ANGPTL3	0.147211	-0.0299963	1.98884	0.0511809	0.557598	-4.09091
NRBF2P2	0.233978	0.0225649	1.98862	0.0512059	0.557648	-4.0913
DEFB1	0.237637	-0.0375226	1.9875	0.051333	0.558364	-4.09325
FLJ43663	0.295972	-0.0409382	1.98714	0.0513737	0.558584	-4.09388
ADAMTS1	0.391449	-0.234257	1.98674	0.0514192	0.558719	-4.09458
ARHGAP9	0.209326	0.0466752	1.98601	0.051503	0.558719	-4.09586
UGCG	0.236906	0.0018987	1.98541	0.0515711	0.558719	-4.0969
ZNF319	0.178177	0.0605699	1.98536	0.0515762	0.558719	-4.09698
RPL7AP56	0.148755	-0.0617813	1.98524	0.0515907	0.558719	-4.0972
IGHA1	0.651874	-0.438681	1.98454	0.0516708	0.559142	-4.09843
MAGED1	0.247331	0.0500396	1.98252	0.0519012	0.560679	-4.10194
SNORD111B	0.144365	-0.0414346	1.98132	0.0520391	0.561063	-4.10403
ITGA11	0.200699	0.0529142	1.98091	0.0520861	0.561063	-4.10474
KRTAP10-9	0.216816	0.0126147	1.98065	0.0521167	0.561063	-4.1052
DRC3	0.16924	0.0264915	1.98028	0.0521589	0.561063	-4.10584
NRBP1	0.214607	0.0465265	1.98018	0.0521705	0.561063	-4.10602
TNFAIP8	0.225394	-0.00645045	1.97999	0.052192	0.561063	-4.10634
IL18BP	0.281162	0.0464431	1.97986	0.0522074	0.561063	-4.10658
ADAM1B	0.16592	-0.040979	1.97657	0.0525871	0.562394	-4.11229
MROH2B	0.256653	0.049226	1.9765	0.0525959	0.562394	-4.11242
RGR	0.162688	0.0148367	1.97623	0.0526267	0.562394	-4.11288
DYSF	0.261501	0.111515	1.97348	0.0529474	0.564235	-4.11767
ROPN1B	0.181261	-0.00839813	1.97247	0.0530648	0.564293	-4.11941
SPDEF	0.259391	-0.0118984	1.97196	0.0531248	0.564293	-4.1203
SEMA3B	0.257183	-0.0325195	1.97184	0.0531389	0.564293	-4.12051
RNF144B	0.225988	0.0127088	1.97131	0.0532007	0.564511	-4.12143
LEF1	0.243439	0.150866	1.97091	0.0532471	0.564783	-4.12211
TRBV2	0.213707	-0.0283228	1.97073	0.0532681	0.564787	-4.12242
OSCAR	0.201011	0.0167922	1.96922	0.0534461	0.565795	-4.12505
PINLYP	0.22455	-0.00568072	1.9675	0.0536487	0.566566	-4.12803
PELI2	0.294812	-0.0407157	1.96602	0.0538236	0.567229	-4.13059
ZNF18	0.224039	-0.0824668	1.966	0.0538254	0.567229	-4.13062
LILRA2	0.179158	0.0246536	1.96568	0.0538635	0.567229	-4.13117
FLNC	0.215546	0.0391414	1.96562	0.0538701	0.567229	-4.13127
TC2N	0.353516	0.00804175	1.96543	0.0538932	0.567229	-4.13161
ITIH4	0.170599	-0.000357385	1.96468	0.0539825	0.567717	-4.13291
TCF23	0.214482	-0.0256666	1.96416	0.0540435	0.567717	-4.1338
TMOD3	0.26363	-0.05043	1.96364	0.0541057	0.567933	-4.1347
KCNK15	0.188409	-0.00254576	1.96331	0.0541443	0.56812	-4.13527
MGAT1	0.170244	0.0273581	1.96202	0.0542981	0.568163	-4.1375
CCR4	0.286594	0.0300944	1.96201	0.0542997	0.568163	-4.13752
NR1H2	0.224964	0.000536876	1.96119	0.0543976	0.568163	-4.13894
FAM216A	0.173851	0.0163232	1.96082	0.0544416	0.568163	-4.13957
TBC1D9	0.284725	-0.0548231	1.96024	0.0545105	0.568163	-4.14057
SCUBE2	0.199057	-0.0431406	1.96014	0.0545228	0.568163	-4.14075
RPS17P13	0.174469	0.0320121	1.96	0.0545391	0.568163	-4.14098
FAM219A	0.212673	-0.00595756	1.95935	0.0546173	0.568163	-4.14211
OR6R2P	0.202373	0.0324688	1.95918	0.0546379	0.568163	-4.1424
DDX39AP1	0.16984	0.0264982	1.95916	0.0546401	0.568163	-4.14244
BCL2L13	0.178075	-0.00140254	1.95793	0.0547876	0.568966	-4.14456
SLC16A4	0.304552	0.030648	1.95764	0.0548226	0.568985	-4.14506
EID1	0.194398	0.0415519	1.95682	0.0549204	0.569603	-4.14646
VCL	0.27202	0.0456205	1.95673	0.0549324	0.569603	-4.14663
ULK4	0.159412	0.0140869	1.95595	0.0550252	0.570349	-4.14796
LCE1C	0.140259	0.0250156	1.95492	0.0551497	0.571234	-4.14973
CEP112	0.187759	-0.0568866	1.9549	0.0551525	0.571234	-4.14977
BCL3	0.209736	0.0496435	1.95439	0.0552143	0.571441	-4.15065
POC1A	0.218704	-0.0391774	1.95404	0.0552566	0.571446	-4.15126
SLC2A13P1	0.16983	-0.0563198	1.95371	0.055296	0.571507	-4.15182
DNMT1	0.173408	0.0233834	1.9535	0.0553218	0.571507	-4.15218
ASB4	0.221572	0.053033	1.95347	0.0553254	0.571507	-4.15223
OR6C69P	0.153379	0.0398365	1.95308	0.0553724	0.571548	-4.1529
MOCS1	0.182597	0.018884	1.95152	0.0555615	0.571807	-4.15558
DNAJC7	0.229483	-0.0135329	1.95134	0.0555842	0.571807	-4.1559
ITGAV	0.234996	0.0406578	1.95099	0.0556266	0.571807	-4.1565
EFNA5	0.209147	-0.0560121	1.95048	0.0556888	0.571807	-4.15738
TMEM39A	0.171652	0.0025258	1.94947	0.0558119	0.572204	-4.15911
LYZ	0.584918	0.27936	1.94775	0.056022	0.572869	-4.16206
ID4	0.158571	-0.0495314	1.94719	0.0560906	0.572869	-4.16302
ELMO1	0.221926	-0.0145431	1.94602	0.0562334	0.572869	-4.16502
GTF2IP2	0.176432	-0.0413808	1.94593	0.0562445	0.572869	-4.16517
NFATC1	0.233122	-0.0838505	1.94579	0.0562619	0.572869	-4.16542
APOBEC3C	0.219443	0.0165483	1.94512	0.0563442	0.573354	-4.16656
ZBTB8OS	0.206636	0.0933502	1.94477	0.0563876	0.573548	-4.16717
SORBS2	0.490232	0.0859867	1.9445	0.0564207	0.573548	-4.16763
RHBDL3	0.181268	0.0399018	1.94393	0.0564912	0.57378	-4.16861
ADAMTS9-AS2	0.260677	-0.075711	1.94334	0.056564	0.573851	-4.16962
C3	0.509315	0.0192219	1.94299	0.0566068	0.573851	-4.17021
JADRR	0.160078	0.0209378	1.94207	0.0567203	0.574398	-4.17179
COL8A2	0.163282	0.054412	1.9414	0.0568043	0.574853	-4.17295
MTND4P4	0.153177	0.0123104	1.94064	0.0568977	0.575341	-4.17424
CEND1	0.209133	-0.0104973	1.93965	0.0570204	0.575942	-4.17593
PRTG	0.178636	0.0186194	1.93902	0.0570989	0.576308	-4.177
CXXC1	0.205222	-0.0345739	1.93845	0.0571704	0.576604	-4.17799
PXDN	0.190119	0.0715594	1.93715	0.0573318	0.577673	-4.1802
IGKV2D-29	0.198512	-0.0515546	1.93675	0.057382	0.577673	-4.18088
MAP2K1	0.178878	-0.0103902	1.93634	0.0574336	0.577673	-4.18159
TXLNB	0.190018	-0.00596555	1.93571	0.0575128	0.577736	-4.18267
TRIM64DP	0.162537	-0.0415776	1.93568	0.0575154	0.577736	-4.1827
SNORD67	0.229123	-0.0325451	1.93547	0.0575418	0.577788	-4.18306
MRFAP1	0.225161	-0.0211311	1.9345	0.0576642	0.578253	-4.18473
ELK3	0.209855	0.0533764	1.93434	0.0576841	0.578253	-4.185
ATP6V1E1	0.270449	0.0622559	1.9343	0.0576886	0.578253	-4.18506
TRIOBP	0.255015	-0.01097	1.93377	0.0577549	0.578651	-4.18596
S100A12	0.368792	0.10974	1.93332	0.0578123	0.579013	-4.18674
DNAJC12	0.265955	-0.0248446	1.93264	0.0578972	0.579458	-4.18789
SNORA11	0.274375	0.0430002	1.93074	0.0581371	0.580118	-4.19113
TRAM2	0.273297	-0.0284022	1.93053	0.0581638	0.580118	-4.19149
CC2D2A	0.240357	-0.0211214	1.92935	0.0583127	0.580362	-4.19349
SLIT2-IT1	0.187317	-0.0565576	1.92909	0.0583456	0.580362	-4.19393
HAGLROS	0.183114	0.0250055	1.92905	0.0583509	0.580362	-4.19401
ATOH1	0.424113	-0.0829947	1.92695	0.0586182	0.581621	-4.19759
CST5	0.153507	-0.0124735	1.92688	0.0586265	0.581621	-4.1977
UBE2Q2P4Y	0.178244	0.01045	1.92539	0.0588164	0.58287	-4.20023
DHX33	0.195189	-0.026323	1.92497	0.0588707	0.582984	-4.20095
TMSB15B	0.185731	-0.0290894	1.92451	0.0589293	0.583095	-4.20173
LMOD1	0.281545	-0.0238285	1.92397	0.0589977	0.583095	-4.20264
OR10D5P	0.156851	-0.0375653	1.92388	0.05901	0.583095	-4.2028
ZMYND19P1	0.168243	0.00259811	1.92239	0.0592001	0.583944	-4.20532
ANKRD44-IT1	0.181142	-0.0382653	1.92195	0.0592565	0.583958	-4.20606
CD180	0.224561	-0.0587327	1.92103	0.0593757	0.584364	-4.20764
CALY	0.122962	-0.0315286	1.91942	0.0595824	0.585717	-4.21036
TRAJ5	0.251411	-0.113769	1.91912	0.0596209	0.585717	-4.21086
ST6GALNAC2	0.182672	0.0142423	1.91889	0.059651	0.585717	-4.21126
PCDHB5	0.280179	-0.000658076	1.91801	0.0597642	0.585739	-4.21274
MROH8	0.171532	-0.0147125	1.9178	0.0597919	0.585739	-4.2131
GXYLT2	0.309032	-0.0121944	1.91738	0.0598467	0.585739	-4.21382
ZNF654	0.197696	0.0185451	1.91636	0.0599783	0.585994	-4.21554
TCF7L1-IT1	0.1867	-0.0571547	1.91627	0.0599903	0.585994	-4.21569
LETM2	0.205511	0.00475813	1.91587	0.0600421	0.586065	-4.21637
IGHV3-25	0.169621	-0.0087822	1.91572	0.0600619	0.586065	-4.21663
FUNDC2P3	0.161343	0.00162314	1.91536	0.0601085	0.586223	-4.21723
BCL2L2-PABPN1	0.162323	0.0281812	1.91507	0.0601464	0.586223	-4.21772
LPCAT4	0.268379	-0.090228	1.91486	0.0601734	0.586223	-4.21808
ULK4P1	0.241026	0.0599834	1.91321	0.0603884	0.587214	-4.22086
PAPSS2	0.230788	-0.122342	1.9131	0.0604026	0.587214	-4.22105
RPS4XP12	0.175129	0.000227221	1.91088	0.0606923	0.587797	-4.22479
ITGB1P1	0.297823	0.198929	1.91068	0.0607194	0.587797	-4.22514
KRTAP10-11	0.192314	0.0430421	1.91045	0.0607492	0.587797	-4.22552
TPBG	0.363052	-0.0294667	1.9103	0.0607684	0.587797	-4.22577
ARAP3	0.181628	0.00937467	1.91013	0.060791	0.587797	-4.22606
RPL4P6	0.173035	-0.0382314	1.91006	0.0607998	0.587797	-4.22617
OR5I1	0.164337	-0.0236734	1.90925	0.0609072	0.588425	-4.22755
POLR3DP1	0.195998	-0.03164	1.90902	0.0609367	0.588502	-4.22793
PTPRN	0.163861	0.0534171	1.90838	0.0610208	0.588913	-4.229
CRIP1	0.383646	0.116176	1.90742	0.0611474	0.589041	-4.23062
AP1M1	0.170124	0.0187566	1.90737	0.0611545	0.589041	-4.23071
UNC93B4	0.176794	0.0134085	1.90572	0.0613723	0.589041	-4.23349
EIF3K	0.247347	0.0518089	1.90557	0.0613924	0.589041	-4.23375
SLIT3	0.275827	-0.218745	1.90537	0.0614181	0.589041	-4.23407
ADCY6	0.230321	-0.0357267	1.90531	0.0614263	0.589041	-4.23418
ARHGEF4	0.184423	-0.0307076	1.9039	0.0616129	0.589369	-4.23655
C2CD4B	0.186776	0.0473974	1.90386	0.0616191	0.589369	-4.23662
ERICD	0.187085	-0.0506363	1.90347	0.0616708	0.589369	-4.23728
HECTD2	0.272057	0.0391479	1.90312	0.0617173	0.589369	-4.23787
TSPAN9	0.229436	-0.0164583	1.90243	0.0618085	0.589904	-4.23902
CALCRL	0.317708	0.01101	1.90237	0.0618166	0.589904	-4.23912
IL16	0.202853	0.0621488	1.90196	0.061871	0.590011	-4.23981
ATRN	0.222706	0.0590277	1.90088	0.0620149	0.591177	-4.24162
PTGER1	0.202025	-0.0332491	1.90031	0.0620914	0.591493	-4.24258
OR2H4P	0.204124	0.0335298	1.89957	0.0621909	0.591748	-4.24383
NBL1	0.202543	0.0464548	1.89947	0.0622041	0.591748	-4.244
PTGER3	0.208423	0.0571035	1.89943	0.0622094	0.591748	-4.24407
PLS3	0.333714	0.163312	1.89863	0.0623168	0.591789	-4.24541
LY6G5C	0.193775	0.090537	1.89845	0.0623399	0.591789	-4.2457
NRK	0.15912	0.0356508	1.89823	0.0623693	0.591789	-4.24607
OR10AB1P	0.17495	-0.0319034	1.89782	0.0624249	0.591789	-4.24676
XKRYP6	0.135543	-0.00578188	1.89675	0.0625684	0.591789	-4.24855
ROBO2	0.167147	0.0403572	1.89639	0.0626168	0.591789	-4.24916
CLEC5A	0.248442	0.0507669	1.89633	0.0626256	0.591789	-4.24927
FOXO1	0.343274	-0.0374043	1.89601	0.0626679	0.591789	-4.24979
FBXL15	0.193369	0.000139141	1.89547	0.0627406	0.591789	-4.2507
GLYCAM1	0.182976	-0.0172622	1.89508	0.0627933	0.591789	-4.25135
GNAO1	0.22191	0.00738753	1.89497	0.0628082	0.591789	-4.25154
MYO16-AS2	0.162055	-0.012313	1.89491	0.0628161	0.591789	-4.25164
MT1P3	0.150319	0.0108094	1.89371	0.0629785	0.592499	-4.25365
NBPF12	0.146592	-0.00278176	1.89325	0.063041	0.592499	-4.25442
TRAPPC9	0.163086	-0.0342448	1.89306	0.063067	0.592499	-4.25474
FUT4	0.215603	0.0556262	1.89262	0.0631263	0.592499	-4.25548
LAMB4	0.159771	0.0110719	1.89254	0.0631364	0.592499	-4.2556
TMEM101	0.15406	-0.0108904	1.89227	0.0631736	0.592499	-4.25606
UMOD	0.153767	-0.0245936	1.89148	0.0632803	0.592551	-4.25737
MYH10	0.14629	0.030754	1.89117	0.063323	0.592551	-4.2579
TEX21P	0.186903	-0.0289124	1.88983	0.0635049	0.5926	-4.26014
KNCN	0.173445	-0.0147505	1.88952	0.0635478	0.5926	-4.26066
PDILT	0.130896	-0.0126986	1.88929	0.0635781	0.5926	-4.26103
LRRC10B	0.200031	-0.012311	1.88813	0.0637369	0.5926	-4.26298
RPL23AP90	0.17833	-0.00388854	1.88803	0.0637498	0.5926	-4.26314
CRYBB2P1	0.247851	0.0346952	1.88791	0.0637674	0.5926	-4.26335
PPP1R26P1	0.170086	-0.010745	1.88787	0.0637717	0.5926	-4.2634
PTPRD-AS2	0.159324	-0.000973621	1.88646	0.0639651	0.59295	-4.26576
DERL2	0.14972	0.00131216	1.88618	0.0640035	0.59295	-4.26623
CACNA1I	0.191397	0.0480058	1.88544	0.0641046	0.593438	-4.26746
PRKCB	0.327211	-0.0858791	1.88537	0.0641151	0.593438	-4.26759
SNORA70F	0.184059	0.00132372	1.88532	0.0641214	0.593438	-4.26766
DVL3	0.162163	0.00480255	1.88509	0.0641539	0.593537	-4.26806
MT1E	0.320842	-0.0569471	1.88368	0.0643467	0.594238	-4.27039
KLHL14	0.181714	-0.0218365	1.88366	0.06435	0.594238	-4.27043
FZD9	0.17149	0.000730789	1.88353	0.0643682	0.594238	-4.27065
CD74	0.280903	0.0611938	1.88343	0.064382	0.594238	-4.27082
DPYSL2	0.269843	0.0587442	1.88244	0.0645177	0.594411	-4.27246
CNTRL	0.272772	-0.0091263	1.88244	0.0645186	0.594411	-4.27247
PRKAR2A-AS1	0.16234	-0.0467866	1.88208	0.0645677	0.594411	-4.27306
CTXN2	0.220134	-0.00274521	1.88119	0.0646912	0.595099	-4.27455
TRBV3-1	0.153871	0.0102156	1.88091	0.0647297	0.595155	-4.27501
RUSC2	0.224074	0.00576737	1.88066	0.0647647	0.595155	-4.27543
DAW1	0.181728	-0.0519279	1.87952	0.0649227	0.595692	-4.27733
PCM1	0.266447	0.0387984	1.87946	0.0649307	0.595692	-4.27743
LRRC34P1	0.157184	-0.0411005	1.87923	0.0649628	0.595692	-4.27781
RPL23AP53	0.154721	0.0682716	1.87895	0.065001	0.595692	-4.27827
SLC11A1	0.24835	0.102379	1.8787	0.0650352	0.595692	-4.27868
NINJ1	0.200181	0.0170913	1.87822	0.0651031	0.595692	-4.27949
OPRL1	0.193453	-0.0245146	1.87756	0.065194	0.595692	-4.28057
OR52V1P	0.177768	-0.056118	1.87654	0.0653369	0.596225	-4.28228
GRAMD1A	0.263535	-0.0152114	1.87495	0.065559	0.596669	-4.28492
ESYT2	0.234293	0.0325569	1.87456	0.0656139	0.596669	-4.28557
FOXA3	0.139514	0.012866	1.87383	0.0657155	0.596669	-4.28677
NLRP9	0.183086	-0.00537014	1.87343	0.0657718	0.596669	-4.28744
PPM1M	0.208194	-0.00827605	1.87319	0.0658048	0.596669	-4.28783
TPRG1-AS1	0.169249	-0.0283004	1.87315	0.0658115	0.596669	-4.2879
OPLAH	0.161285	0.00183215	1.87299	0.0658328	0.596669	-4.28816
BRD1	0.180327	0.00821819	1.87288	0.0658487	0.596669	-4.28834
EMILIN2	0.169823	0.0107572	1.87265	0.0658812	0.596669	-4.28873
SDR39U1	0.1405	-0.00910447	1.87263	0.0658832	0.596669	-4.28875
TVP23BP2	0.171598	0.0110785	1.87244	0.0659104	0.596669	-4.28907
TRAJ41	0.444904	-0.0154575	1.87237	0.0659203	0.596669	-4.28919
WNT16	0.151585	-0.0493881	1.87209	0.0659604	0.596669	-4.28966
LRRC32	0.217962	0.0697528	1.87173	0.0660103	0.596669	-4.29025
RBM22P1	0.19426	-0.0147847	1.87155	0.0660361	0.596669	-4.29055
EYA2	0.176503	-0.0802873	1.87124	0.0660799	0.596669	-4.29107
TMEM92-AS1	0.156923	0.0142854	1.87077	0.0661451	0.596669	-4.29183
DENND4A	0.245578	-0.0620524	1.87037	0.0662021	0.596669	-4.2925
MRPS11	0.193089	0.0173056	1.87014	0.0662348	0.596669	-4.29289
PPP1R14A	0.227137	-0.060876	1.86994	0.0662631	0.596669	-4.29322
KCNJ1	0.160803	-0.0438318	1.86979	0.0662845	0.596669	-4.29347
C16orf72	0.159936	0.0350882	1.86942	0.0663366	0.596669	-4.29408
SLC5A2	0.135287	0.00251096	1.86934	0.0663472	0.596669	-4.29421
MARK4	0.177711	0.00432536	1.86933	0.0663495	0.596669	-4.29423
PDE4A	0.240161	-0.0276111	1.86887	0.0664139	0.596669	-4.29499
BVES	0.168629	-0.0332128	1.86836	0.0664862	0.596669	-4.29583
HOXB5	0.228304	0.0318429	1.86815	0.0665152	0.596669	-4.29617
USP38	0.253066	0.0358912	1.86787	0.0665557	0.596669	-4.29664
CGB5	0.168519	-0.0348518	1.86726	0.066642	0.59674	-4.29765
PLK3	0.174562	0.0421378	1.8663	0.0667788	0.597182	-4.29924
RABAC1	0.12196	-0.00863758	1.86561	0.0668758	0.597657	-4.30037
GPRC5B	0.182825	0.0341258	1.86544	0.0669007	0.597685	-4.30066
TNC	0.26338	-0.00435312	1.86521	0.0669331	0.597778	-4.30104
CYCSP24	0.178125	0.0679646	1.86455	0.0670272	0.598102	-4.30213
DUX4L45	0.117827	0.006529	1.86404	0.0671002	0.598102	-4.30297
HBA2	0.337838	-0.152603	1.86403	0.0671008	0.598102	-4.30298
OR4K17	0.174794	-0.0443327	1.86302	0.0672453	0.598226	-4.30465
CFI	0.214046	0.0787341	1.86298	0.0672513	0.598226	-4.30472
RYKP1	0.206686	0.0433781	1.86252	0.0673175	0.598226	-4.30548
KLHL10	0.170733	0.0256366	1.8622	0.0673623	0.598226	-4.306
SMC6	0.168752	-0.000579683	1.8621	0.0673776	0.598226	-4.30617
PPP2R2DP1	0.188474	-0.01383	1.86146	0.0674691	0.598578	-4.30723
SCARNA3	0.269419	-0.0942083	1.86103	0.0675299	0.598578	-4.30793
EPAS1	0.207686	-0.0542308	1.86068	0.0675806	0.598665	-4.30851
TNFSF15	0.220049	0.00735919	1.85956	0.0677411	0.599248	-4.31035
CDCP2	0.173827	0.0242652	1.85946	0.0677561	0.599248	-4.31052
CD101	0.137477	0.00715868	1.85815	0.0679449	0.599478	-4.31268
ZFAT-AS1	0.158182	0.00349617	1.85807	0.0679555	0.599478	-4.3128
ACTL7A	0.160855	-0.0290948	1.85804	0.0679603	0.599478	-4.31286
SCN3B	0.220332	0.0103469	1.85784	0.0679887	0.599478	-4.31318
ZDHHC20P2	0.161088	-0.0260191	1.85763	0.0680194	0.599478	-4.31353
TNFSF4	0.193055	-0.00371871	1.85642	0.0681942	0.600115	-4.31552
HSPC324	0.16089	-0.0472767	1.85636	0.068203	0.600115	-4.31562
SNORA69	0.345295	-0.0271926	1.85605	0.0682474	0.600115	-4.31613
FBLN2	0.191584	0.047008	1.85503	0.0683953	0.600115	-4.3178
GCH1	0.188703	-0.00733547	1.85497	0.0684037	0.600115	-4.3179
NMS	0.170081	-0.041665	1.85437	0.0684912	0.600304	-4.31889
SSBP3-AS1	0.165216	-0.00354689	1.85345	0.0686252	0.600823	-4.32041
NUTF2P6	0.13572	0.0127093	1.85251	0.0687622	0.601198	-4.32195
PPP1R12A	0.256418	-0.0315711	1.8522	0.0688063	0.601198	-4.32245
FZD10-AS1	0.2638	-0.00276413	1.85216	0.0688127	0.601198	-4.32252
NHLH2	0.173313	-0.0199814	1.85203	0.0688319	0.601198	-4.32274
MEX3B	0.200748	0.0855414	1.85191	0.0688498	0.601198	-4.32294
STX8	0.312213	0.00398343	1.85173	0.0688749	0.601198	-4.32322
NDUFB4P9	0.181682	-0.093604	1.85146	0.0689149	0.601198	-4.32367
COPS8P3	0.163523	-0.021946	1.85111	0.068966	0.601198	-4.32425
LTBP3	0.168897	0.0224301	1.8511	0.0689676	0.601198	-4.32426
FAM90A3P	0.197977	-0.00619539	1.85038	0.0690728	0.601302	-4.32545
MAF	0.307641	-0.068172	1.85021	0.0690972	0.601302	-4.32572
SIDT2	0.256102	0.0462073	1.85008	0.0691167	0.601302	-4.32594
SP2	0.189421	0.0322982	1.84941	0.0692148	0.601302	-4.32704
ENO1P2	0.185801	0.00403571	1.84923	0.0692403	0.601302	-4.32732
NDUFS6P1	0.191238	-0.0586378	1.84891	0.0692879	0.601302	-4.32785
ZFPM2	0.185217	-0.0674498	1.84797	0.0694253	0.602304	-4.32939
CT62	0.147196	0.00227959	1.84601	0.0697139	0.603983	-4.3326
SALL3	0.136394	0.0375438	1.8459	0.0697295	0.603983	-4.33278
APOL3	0.19234	-0.0158034	1.84519	0.069834	0.604361	-4.33394
SNAPC2	0.173103	0.0240634	1.84458	0.0699248	0.604907	-4.33494
SAMD9	0.331166	-0.0508861	1.84399	0.070012	0.605278	-4.33591
PLA2G5	0.149062	0.0510845	1.84357	0.0700738	0.60562	-4.33659
FOXD4L1	0.184403	0.000514752	1.84211	0.0702901	0.606025	-4.33897
MTND2P8	0.137964	-0.0218556	1.84191	0.0703203	0.606025	-4.33931
RNF41	0.194486	0.00410509	1.84141	0.0703942	0.606078	-4.34012
IMPA2	0.159737	0.0512372	1.84127	0.0704151	0.606078	-4.34035
DPPA5P1	0.163387	0.00444555	1.84127	0.0704154	0.606078	-4.34035
ANKRD20A18P	0.183017	-0.0322933	1.84079	0.0704864	0.60617	-4.34113
IQGAP1	0.277841	-0.0341532	1.84049	0.0705305	0.60617	-4.34162
AMZ2P1	0.24217	0.0220759	1.83878	0.0707866	0.606632	-4.34442
GEM	0.167187	-0.0506566	1.83837	0.0708469	0.606632	-4.34508
TOP1P1	0.181985	-0.0646202	1.83726	0.0710135	0.606632	-4.3469
ANAPC13	0.217886	0.168467	1.83721	0.07102	0.606632	-4.34697
FAM25A	0.12068	0.00016275	1.83682	0.0710796	0.606632	-4.34762
LPP	0.284989	-0.00466803	1.83659	0.0711126	0.606718	-4.34798
FAM43B	0.182456	0.0299397	1.83615	0.0711793	0.606724	-4.3487
VIPR1-AS1	0.165776	-0.00580155	1.83535	0.0713	0.607326	-4.35001
LMF1	0.141591	-0.00137036	1.83494	0.0713611	0.607326	-4.35067
CEACAMP11	0.173509	-0.00747158	1.83426	0.0714638	0.60766	-4.35179
NFIC	0.161436	0.102128	1.83327	0.0716126	0.608517	-4.35339
CCPG1	0.273686	0.0069638	1.83258	0.071716	0.608736	-4.35451
NAIP	0.313593	-0.00599292	1.8323	0.0717578	0.608736	-4.35496
PTPN6	0.183202	0.0465992	1.83225	0.071766	0.608736	-4.35505
KRT17	0.149498	-0.0366934	1.83198	0.0718068	0.608736	-4.35549
KDM6B	0.14408	-0.00216986	1.83184	0.0718276	0.608736	-4.35571
SGCD	0.237047	0.0165365	1.83073	0.0719958	0.609309	-4.35752
BARX2	0.275909	-0.0998604	1.82971	0.0721495	0.609651	-4.35917
ICAM3	0.18638	0.000969221	1.82963	0.0721617	0.609651	-4.3593
MYO9B	0.195931	-0.00330244	1.82958	0.0721702	0.609651	-4.35939
DUTP7	0.148548	-0.024895	1.8291	0.0722421	0.61007	-4.36016
SRSF4	0.142982	-0.0102068	1.8279	0.0724254	0.610097	-4.36211
SLC7A4	0.169327	0.0954071	1.82769	0.0724571	0.610097	-4.36245
APCS	0.153876	-0.0242398	1.82754	0.0724799	0.610097	-4.3627
SRGN	0.434045	0.0615181	1.82752	0.072483	0.610097	-4.36273
BAIAP3	0.197149	0.0290369	1.82711	0.0725452	0.610097	-4.36339
CLN8	0.233665	0.130789	1.8268	0.0725928	0.610097	-4.3639
SUCLG2	0.228854	-0.0297842	1.82673	0.0726029	0.610097	-4.364
MTCO2P3	0.117932	-0.0610696	1.8264	0.0726531	0.610143	-4.36454
MAEL	0.143459	-0.00214274	1.82539	0.0728076	0.610169	-4.36618
CNIH3	0.195784	0.00482262	1.82485	0.0728911	0.610372	-4.36706
C1GALT1C1L	0.145423	0.0537673	1.82447	0.0729483	0.610372	-4.36767
ZBTB45P2	0.177606	-0.0389262	1.82447	0.0729487	0.610372	-4.36767
VSIG8	0.181987	0.0522721	1.82417	0.0729938	0.610376	-4.36815
MEPE	0.147754	-0.0800464	1.82395	0.0730287	0.610437	-4.36852
TSSK3	0.181645	0.0823357	1.8227	0.0732192	0.611324	-4.37053
FLJ36000	0.149354	-0.0253411	1.82147	0.0734081	0.611581	-4.37252
CD55	0.608747	0.323384	1.81916	0.0737648	0.613068	-4.37626
PHTF1	0.165343	-0.0284412	1.81813	0.0739238	0.613082	-4.37792
PPP2R3B	0.184916	0.0170484	1.81765	0.0739986	0.613082	-4.3787
RIC1	0.180479	0.0293405	1.81761	0.0740051	0.613082	-4.37877
FSD2	0.165974	-0.0603987	1.81716	0.0740739	0.613082	-4.37948
SYT11	0.192793	0.00127355	1.81621	0.074222	0.613476	-4.38102
ATP10A	0.192215	0.0467549	1.81591	0.074268	0.613476	-4.3815
KRI1	0.176763	-0.0176202	1.81573	0.0742962	0.613476	-4.38179
B3GALT5	0.172523	-0.0128112	1.81557	0.0743207	0.613476	-4.38205
RELL2	0.195578	0.059021	1.81557	0.0743213	0.613476	-4.38205
GIT2	0.214226	0.00544578	1.8151	0.0743951	0.613484	-4.38282
CSRNP1	0.211562	-0.104543	1.81504	0.0744044	0.613484	-4.38292
GRIPAP1	0.191998	-0.0299485	1.81491	0.0744245	0.613484	-4.38312
SEBOX	0.162078	0.00363989	1.81389	0.0745835	0.613979	-4.38477
KIAA0319	0.168526	-0.0360175	1.81358	0.0746319	0.613979	-4.38527
WBP1LP4	0.168774	0.0164714	1.81265	0.0747768	0.614017	-4.38676
SLC6A13	0.135271	-0.0198519	1.81149	0.0749579	0.614697	-4.38863
CYP2C59P	0.166231	0.000211201	1.81139	0.074974	0.614697	-4.38879
TMCC1	0.241086	0.0274304	1.81025	0.0751523	0.61528	-4.39062
C1orf74	0.170949	0.0209469	1.80975	0.0752307	0.61528	-4.39143
PRKG2	0.161714	-0.0520951	1.80968	0.0752414	0.61528	-4.39154
RPL9P16	0.206988	-0.0666579	1.80935	0.0752931	0.61528	-4.39207
RGCC	0.423521	0.140048	1.80854	0.07542	0.615397	-4.39336
RPS6KL1	0.168484	0.0219151	1.8063	0.0757742	0.616027	-4.39697
ID3	0.19653	-0.0325745	1.80614	0.0757987	0.616027	-4.39722
MON1A	0.195048	0.000290772	1.80608	0.0758089	0.616027	-4.39732
KYNUP3	0.129066	-0.0266601	1.80591	0.0758355	0.616027	-4.39759
FYCO1	0.196946	-0.038218	1.8057	0.0758684	0.616027	-4.39793
ESPN	0.167117	0.00762064	1.80515	0.0759557	0.616027	-4.39881
CDHR3	0.19082	-0.0391564	1.80408	0.076125	0.616027	-4.40053
PTPRU	0.284024	0.0951653	1.80387	0.0761587	0.616027	-4.40087
FOXG1	0.170464	-0.00463973	1.80325	0.076257	0.616027	-4.40186
HRH2	0.254825	-0.00964854	1.80304	0.0762901	0.616027	-4.40219
TRAPPC6B	0.185511	0.0106252	1.80298	0.0763003	0.616027	-4.4023
FURIN	0.223368	0.0190289	1.80263	0.076356	0.616027	-4.40286
KRT84	0.201431	-0.0201114	1.80223	0.0764193	0.616027	-4.4035
SKOR2	0.121857	-0.0989366	1.80221	0.076422	0.616027	-4.40352
AGPAT4	0.219977	-0.0068336	1.80184	0.0764806	0.616027	-4.40411
ADAMTSL4-AS1	0.225395	-0.0774464	1.80113	0.0765941	0.616138	-4.40525
ACTR3BP6	0.14277	-0.0260564	1.80065	0.0766707	0.616149	-4.40602
SNORD114-24	0.114998	-0.0485682	1.80029	0.0767277	0.616149	-4.40659
HCG14	0.193742	-0.0339993	1.79824	0.0770565	0.617283	-4.40988
LYVE1	0.242884	-0.074762	1.79812	0.0770755	0.617283	-4.41007
TENM4	0.192071	0.0266212	1.7973	0.0772069	0.61761	-4.41138
NUMA1	0.190035	0.0382135	1.79671	0.0773015	0.618005	-4.41232
RNF180	0.221286	-0.0266124	1.79647	0.0773399	0.618131	-4.4127
RAPGEF3	0.198997	-0.0930103	1.79566	0.0774711	0.618353	-4.41401
CMKLR1	0.304675	-0.00980325	1.79551	0.0774945	0.618353	-4.41424
STXBP5	0.23904	-0.0796387	1.79547	0.0775008	0.618353	-4.4143
DUX4L47	0.162589	0.0592237	1.79546	0.0775036	0.618353	-4.41433
APOA1	0.170958	0.0569267	1.7949	0.0775933	0.618699	-4.41522
MAP4	0.236532	0.0230888	1.79462	0.0776376	0.618699	-4.41566
ACTG1P2	0.175519	0.0504539	1.79441	0.0776722	0.618773	-4.416
RUNDC3A-AS1	0.157911	-0.0189541	1.79426	0.0776962	0.618773	-4.41624
STIM2	0.285503	0.059224	1.79393	0.0777493	0.618773	-4.41676
RAB3B	0.203769	-0.0205977	1.79372	0.0777829	0.618773	-4.41709
CNNM4	0.192265	-0.015472	1.79341	0.077834	0.618999	-4.4176
PLEKHG1	0.250528	0.00461976	1.79305	0.0778911	0.619054	-4.41816
TBC1D3P5	0.175845	0.00438311	1.79244	0.077991	0.619275	-4.41915
CD59	0.338083	0.072829	1.79182	0.0780906	0.619416	-4.42013
ZNF644	0.195009	0.0038099	1.79137	0.0781632	0.619608	-4.42084
UNC5B	0.179336	-0.00530423	1.79112	0.078204	0.619608	-4.42124
ASMTL-AS1	0.145518	0.0195105	1.79111	0.0782055	0.619608	-4.42126
MYO5A	0.217694	0.0346434	1.7908	0.0782565	0.619652	-4.42176
MILR1	0.206127	-0.0669104	1.78954	0.078461	0.619833	-4.42376
FAM107B	0.274816	-0.127277	1.78821	0.078678	0.621217	-4.42588
KLF7P1	0.169221	0.0426589	1.78801	0.0787107	0.621217	-4.4262
FGD6	0.234561	0.104954	1.78768	0.0787636	0.621217	-4.42672
PCAT1	0.130858	-0.0441995	1.7872	0.0788426	0.621217	-4.42749
RPL29P19	0.174858	-0.00885674	1.78714	0.0788522	0.621217	-4.42758
SNX29P1	0.196767	0.0364779	1.78714	0.0788524	0.621217	-4.42758
CLASRP	0.140608	-0.00921737	1.78702	0.0788713	0.621217	-4.42777
RNF126	0.185874	0.00119909	1.78656	0.0789473	0.621217	-4.42851
KCNJ15	0.164988	0.0497308	1.78532	0.0791494	0.621217	-4.43047
CD1C	0.153365	-0.0550849	1.78488	0.0792221	0.62135	-4.43117
FIBIN	0.214568	0.0621349	1.78397	0.0793706	0.622146	-4.43261
NECAP1P2	0.154046	0.025233	1.78362	0.0794278	0.622146	-4.43316
TRAV28	0.182925	-0.0172528	1.78302	0.0795269	0.622146	-4.43412
FRMD4B	0.166734	0.00595104	1.78229	0.0796471	0.622146	-4.43528
SALL4P6	0.18034	-0.0334423	1.78217	0.0796674	0.622146	-4.43547
PNMA6B	0.149757	0.00633868	1.78215	0.0796702	0.622146	-4.4355
FBXO39	0.169677	-0.0140546	1.78165	0.0797522	0.622146	-4.43629
G6PC2	0.167589	-0.0369567	1.78133	0.0798051	0.622146	-4.4368
LARGE-IT1	0.236544	-0.0425545	1.78131	0.0798092	0.622146	-4.43684
GNAI1	0.399508	0.00216551	1.78119	0.0798282	0.622146	-4.43702
RNF225	0.163871	0.0365579	1.78108	0.079847	0.622146	-4.4372
DNM1P33	0.166779	-0.0381547	1.78098	0.0798642	0.622146	-4.43737
ADGRD1	0.181195	-0.0119473	1.78093	0.0798723	0.622146	-4.43744
HAGLR	0.548904	-0.188269	1.78065	0.0799178	0.622146	-4.43788
NAALADL2-AS1	0.157858	0.00260396	1.78052	0.0799388	0.622146	-4.43808
SARNP	0.21934	0.00537269	1.77906	0.0801814	0.623321	-4.4404
XGY1	0.186293	0.0302562	1.77901	0.0801888	0.623321	-4.44048
JAM3	0.290304	0.0783128	1.7784	0.0802897	0.623689	-4.44144
ZSCAN31	0.197246	0.00346013	1.7771	0.0805065	0.624251	-4.44351
CDY13P	0.183159	0.0157495	1.77678	0.0805596	0.624464	-4.44401
THAP3	0.199703	-0.00608409	1.77603	0.0806835	0.624531	-4.44519
HIPK2	0.242511	-0.000201684	1.77578	0.0807256	0.624531	-4.44559
TANK	0.253211	0.0918393	1.77558	0.0807592	0.624614	-4.44591
DEFB121	0.149405	-0.00557369	1.7739	0.0810397	0.626315	-4.44856
COL5A2	0.166245	0.0718417	1.77383	0.0810503	0.626315	-4.44866
SS18	0.38438	-0.00221852	1.77364	0.0810826	0.626315	-4.44897
CCL21	0.224667	-0.0101528	1.77344	0.0811168	0.626315	-4.44929
FXYD4	0.19756	0.0163291	1.77296	0.0811959	0.626636	-4.45004
HSPBP1	0.13444	-0.00131501	1.77289	0.0812075	0.626636	-4.45015
PTPRG	0.318308	0.137756	1.77278	0.0812272	0.626636	-4.45033
ID2	0.358043	-0.0599839	1.77194	0.0813677	0.626991	-4.45166
PRSS1	0.193149	0.0251394	1.77191	0.0813719	0.626991	-4.4517
MS4A7	0.285397	-0.0939403	1.77182	0.081388	0.626991	-4.45185
SLC25A51	0.18248	0.0376973	1.77119	0.0814929	0.627405	-4.45284
DST	0.410384	-0.117734	1.7705	0.081609	0.627848	-4.45393
C1orf216	0.156662	-0.00901514	1.76984	0.0817202	0.628132	-4.45497
FKBP7	0.252425	0.0788951	1.76933	0.0818057	0.628612	-4.45577
CCL11	0.180172	-0.023921	1.76846	0.0819518	0.629381	-4.45713
RPS6KA2-IT1	0.182347	0.012692	1.76819	0.0819988	0.629414	-4.45757
KANSL1	0.161074	0.00618908	1.76688	0.0822194	0.629871	-4.45963
HECW2	0.233375	0.0204131	1.76622	0.0823315	0.630515	-4.46067
C3orf18	0.214114	-0.0109208	1.76501	0.0825354	0.630846	-4.46256
CRYM	0.12878	0.0156596	1.7641	0.0826898	0.631849	-4.46399
GPR108	0.160165	-0.00256909	1.76375	0.0827499	0.632131	-4.46455
GOLGA2P5	0.150656	-0.032219	1.76282	0.0829083	0.632638	-4.46601
RPL21P54	0.155855	0.0273178	1.75981	0.0834222	0.634957	-4.47074
OR51E1	0.211644	0.0616638	1.75958	0.0834617	0.635061	-4.4711
BMP2KL	0.241287	-0.0588591	1.75918	0.0835299	0.635069	-4.47172
CLC	0.171916	-0.0258214	1.75866	0.0836189	0.63545	-4.47254
GRP	0.206524	0.0500448	1.75862	0.0836265	0.63545	-4.47261
FLYWCH1P1	0.177419	-0.0331355	1.75838	0.0836671	0.635532	-4.47298
FANCD2OS	0.164855	-0.0389325	1.75753	0.0838132	0.636109	-4.47431
CYSLTR1	0.208225	-0.0121737	1.75661	0.0839718	0.636613	-4.47575
FRMD7	0.152447	0.0240572	1.75647	0.0839952	0.636613	-4.47597
F2R	0.157686	0.0118509	1.75579	0.0841128	0.636613	-4.47704
NBPF15	0.174707	0.0231183	1.75512	0.0842282	0.636613	-4.47808
ZNF133	0.149087	0.00577845	1.75511	0.0842302	0.636613	-4.4781
RPS27P1	0.14144	-0.00901949	1.75503	0.0842439	0.636613	-4.47823
ANXA6	0.206495	0.0234604	1.75369	0.0844745	0.636664	-4.48031
IGKV2-4	0.163073	-0.0619292	1.75337	0.0845304	0.636664	-4.48082
PYROXD2	0.185648	-0.0156034	1.75324	0.0845523	0.636664	-4.48102
CCM2	0.221462	-0.0227699	1.75215	0.0847424	0.636664	-4.48273
KIF26B	0.316315	0.194058	1.75184	0.0847953	0.636684	-4.48321
RAET1L	0.203779	0.0981477	1.75091	0.084958	0.63683	-4.48467
NEK5	0.21054	0.020757	1.75068	0.0849978	0.63683	-4.48503
WFDC10A	0.147983	-0.0397639	1.74937	0.0852257	0.637476	-4.48707
OR51AB1P	0.157862	0.00656495	1.74925	0.0852455	0.637476	-4.48725
LUZP1	0.182015	-0.00441402	1.74905	0.0852805	0.637476	-4.48756
ZBTB46	0.125643	0.0517571	1.74881	0.0853227	0.637476	-4.48794
BDKRB1	0.236986	-0.0675298	1.74824	0.0854217	0.637503	-4.48882
GAGE4	0.180451	-0.0586232	1.74805	0.0854548	0.637503	-4.48912
LPAR5	0.225703	-0.0207614	1.74776	0.085506	0.637503	-4.48958
ANKRD1	0.17422	-0.0325143	1.74771	0.0855153	0.637503	-4.48966
DUSP3	0.244102	0.0625853	1.74767	0.0855221	0.637503	-4.48972
VKORC1	0.269708	0.214855	1.74739	0.0855712	0.637503	-4.49016
ACTG1P16	0.133839	0.0314808	1.74733	0.0855812	0.637503	-4.49025
ZSWIM6	0.274066	-0.030532	1.74665	0.0857006	0.637503	-4.49131
S1PR2	0.201675	0.0462269	1.7462	0.0857793	0.637503	-4.49201
BLK	0.162655	0.0494671	1.74604	0.0858067	0.637503	-4.49225
IFIT1	0.285296	-0.0600565	1.74596	0.0858204	0.637503	-4.49238
ZNF571	0.183128	-0.0394093	1.74539	0.0859213	0.637503	-4.49327
PROS2P	0.170166	-0.0366885	1.74536	0.0859257	0.637503	-4.49331
DDX20	0.122265	0.0167366	1.74462	0.0860565	0.637587	-4.49447
FEZ1	0.200071	-0.0166478	1.74394	0.0861751	0.637587	-4.49552
RPS3AP17	0.159392	-0.06425	1.74391	0.0861804	0.637587	-4.49557
BAALC	0.158308	-0.0218371	1.74387	0.0861873	0.637587	-4.49563
FSIP1	0.164668	0.0157124	1.74346	0.0862604	0.637587	-4.49627
CRISPLD2	0.182503	0.0195515	1.74302	0.086338	0.637587	-4.49696
CRYAB	0.27223	0.0924089	1.74268	0.0863966	0.637587	-4.49748
FGFBP1	0.302402	-0.0126126	1.74218	0.0864862	0.637658	-4.49827
NCBP2L	0.144383	-0.0195576	1.74204	0.08651	0.637661	-4.49848
COPG1	0.196289	0.084895	1.74179	0.0865539	0.637729	-4.49886
FAM90A4P	0.159572	-0.00633816	1.74172	0.0865659	0.637729	-4.49897
BNIP3P15	0.14895	-0.0292161	1.7414	0.0866232	0.637978	-4.49947
UBE2R2-AS1	0.172238	-0.0221265	1.74104	0.086686	0.638167	-4.50003
C2CD2	0.252436	0.0468606	1.74044	0.0867919	0.638235	-4.50096
GPX6	0.173883	0.0366951	1.74041	0.0867983	0.638235	-4.50101
ARHGEF28	0.208706	0.0384122	1.74013	0.0868477	0.638426	-4.50145
SLC15A5	0.133554	-0.00839545	1.73954	0.0869523	0.638611	-4.50236
OR2U2P	0.126944	-0.0415962	1.73946	0.0869664	0.638611	-4.50249
SIK1	0.300192	0.0363833	1.73909	0.0870314	0.638745	-4.50306
MVB12A	0.179335	0.0557028	1.73824	0.0871821	0.639313	-4.50437
CNP	0.173425	0.0289511	1.73811	0.0872056	0.639313	-4.50458
GNPTG	0.151546	0.00311727	1.738	0.0872259	0.639313	-4.50476
PRAME	0.162619	0.0467945	1.73755	0.0873055	0.639553	-4.50545
ACTG1P14	0.162372	-0.0223878	1.73729	0.0873512	0.639643	-4.50585
PRND	0.151965	0.0521225	1.73647	0.0874977	0.640095	-4.50713
CPEB2	0.221718	0.0387122	1.73639	0.0875117	0.640095	-4.50725
EIF3EP2	0.20819	-0.0112783	1.73634	0.0875201	0.640095	-4.50732
IFT81	0.18196	0.0199863	1.73602	0.0875781	0.640176	-4.50782
KRT8P10	0.1274	-0.0445119	1.73574	0.0876281	0.64037	-4.50826
GPR107	0.203972	-0.0158461	1.73529	0.0877067	0.640686	-4.50894
LIX1L	0.169655	0.0166123	1.73503	0.0877544	0.640686	-4.50936
DRGX	0.15428	0.0106711	1.73497	0.0877652	0.640686	-4.50945
RHOT2	0.167557	0.0390274	1.73444	0.0878602	0.640973	-4.51027
PIP5K1C	0.182795	0.00347128	1.73405	0.0879281	0.640973	-4.51086
ZCCHC2	0.286548	-0.0368163	1.73405	0.0879283	0.640973	-4.51086
SIPA1	0.203261	-0.00990598	1.73397	0.0879435	0.640973	-4.51099
ERMAP	0.272237	-0.068806	1.73396	0.0879454	0.640973	-4.51101
MRPS18AP1	0.15734	-0.0129177	1.73337	0.0880505	0.641122	-4.51192
TANGO2	0.169655	0.00728683	1.73324	0.0880735	0.641122	-4.51212
OXER1	0.201149	-0.0847249	1.7328	0.088153	0.641122	-4.51281
NPAS3	0.180745	-0.00177555	1.73269	0.0881727	0.641122	-4.51298
CXCL5	0.394074	0.243768	1.73228	0.0882464	0.641122	-4.51361
IGBP1-AS1	0.145402	0.00632698	1.73219	0.0882614	0.641122	-4.51374
TMEM81	0.144493	-0.0387698	1.73199	0.0882971	0.641122	-4.51405
KCNS3	0.167633	-0.0357995	1.73181	0.0883305	0.641122	-4.51434
CD48	0.213595	-0.0545148	1.73134	0.0884145	0.641122	-4.51506
FLG-AS1	0.17769	-0.0097397	1.73105	0.0884674	0.641122	-4.51551
FN1	0.514624	0.293341	1.73078	0.0885153	0.641122	-4.51593
ZNF528-AS1	0.265236	-0.0276839	1.73057	0.0885529	0.641122	-4.51625
WDR7	0.156489	-0.0785117	1.72994	0.0886661	0.641176	-4.51722
FICD	0.195538	0.0392005	1.72962	0.0887248	0.641176	-4.51772
KIF13B	0.162581	-0.0231506	1.72863	0.0889022	0.641441	-4.51924
MN1	0.15494	-0.0207374	1.72854	0.0889187	0.641441	-4.51938
PGLS	0.216106	0.0537467	1.7285	0.0889258	0.641441	-4.51945
FAM86EP	0.180728	0.0143584	1.72817	0.0889848	0.641555	-4.51995
EVI2A	0.362465	-0.02854	1.72815	0.0889887	0.641555	-4.51998
HBA1	0.295917	-0.128534	1.72723	0.0891549	0.642075	-4.5214
RPL3P12	0.133595	-0.0126478	1.72708	0.0891827	0.642106	-4.52164
MT1H	0.191549	-0.0584458	1.72676	0.0892397	0.642106	-4.52212
C3orf36	0.148949	-0.0486658	1.72653	0.0892826	0.642106	-4.52249
SELPLG	0.200292	0.0740503	1.72618	0.0893462	0.642106	-4.52303
NDN	0.184605	0.0167311	1.72594	0.0893896	0.642106	-4.5234
CXCR3	0.153273	0.0136336	1.7258	0.089414	0.642106	-4.52361
ST6GAL2	0.57191	0.0934572	1.72508	0.0895457	0.642106	-4.52473
RFX7	0.222409	-0.0212525	1.72501	0.089558	0.642106	-4.52483
VSIG2	0.361156	-0.241138	1.72485	0.0895863	0.642106	-4.52507
GPR141	0.188993	0.0407751	1.72484	0.0895876	0.642106	-4.52508
PRH2	0.158253	0.0342939	1.72466	0.0896218	0.642106	-4.52537
FGF1	0.136108	0.0279486	1.72416	0.0897124	0.642106	-4.52614
GHRHR	0.194401	-0.037929	1.72373	0.0897907	0.642273	-4.5268
IGFBP3	0.32254	0.211638	1.72355	0.0898233	0.642273	-4.52708
SBSPON	0.345201	0.149165	1.72332	0.0898646	0.642273	-4.52743
TXNIP	0.321388	0.0178834	1.72307	0.0899105	0.642433	-4.52782
AGXT	0.151264	-0.0378938	1.72205	0.0900964	0.643425	-4.52938
RNF121	0.132014	0.017906	1.72173	0.0901546	0.643672	-4.52988
SEC14L1	0.225291	0.0034312	1.72139	0.0902162	0.643722	-4.53039
RPL23AP82	0.143482	0.0596242	1.72134	0.090225	0.643722	-4.53047
ASAH1	0.242891	0.0969383	1.7213	0.0902324	0.643722	-4.53053
APOOP2	0.154541	-0.0135097	1.72108	0.0902724	0.643736	-4.53087
HMGB3P7	0.158533	0.00573028	1.72103	0.0902815	0.643736	-4.53094
KLHL42	0.149944	0.0286728	1.72057	0.0903672	0.643738	-4.53166
PLXDC1	0.281329	-0.0324126	1.72032	0.0904128	0.643738	-4.53205
H6PD	0.150644	-0.0160515	1.72026	0.0904232	0.643738	-4.53213
TMEM200B	0.175979	0.0220816	1.71993	0.090483	0.643855	-4.53264
ANXA1	0.371111	0.100519	1.71985	0.0904987	0.643855	-4.53277
FADS2	0.362054	0.0365374	1.71947	0.090567	0.643855	-4.53334
HSD3B2	0.181907	0.00992684	1.7194	0.0905812	0.643855	-4.53346
CLIC4P2	0.153629	0.0247402	1.71791	0.0908543	0.645114	-4.53575
HMGN2P11	0.168916	0.00265203	1.71735	0.090957	0.645114	-4.5366
PITPNA	0.183917	0.0167843	1.7172	0.0909852	0.645114	-4.53684
HLA-DQB2	0.16062	-0.0299936	1.71713	0.0909965	0.645114	-4.53693
NOP14-AS1	0.220875	-0.0208919	1.71634	0.0911427	0.645114	-4.53815
TRIM52	0.208052	-0.0077111	1.71594	0.0912162	0.645114	-4.53876
VMP1	0.250648	-0.0363205	1.71588	0.0912283	0.645114	-4.53886
METRN	0.159391	-0.00767459	1.71583	0.0912359	0.645114	-4.53893
TIMM9P1	0.134837	-0.0262695	1.71577	0.091248	0.645114	-4.53903
PHTF2	0.262231	0.0254408	1.71571	0.091259	0.645114	-4.53912
SNORD114-17	0.222525	-0.0268129	1.71526	0.0913419	0.645114	-4.53981
EEF2	0.226665	0.0868271	1.71509	0.0913722	0.645114	-4.54006
BTN3A1	0.212731	0.050725	1.71459	0.0914648	0.645264	-4.54083
LZTR1	0.189122	-0.0494377	1.71404	0.0915664	0.645381	-4.54167
TRPM2	0.115704	0.00776906	1.71389	0.0915954	0.645381	-4.54191
FGF16	0.193156	-0.01069	1.71358	0.0916521	0.645381	-4.54238
DDX11-AS1	0.167438	-0.00211692	1.71351	0.0916651	0.645381	-4.54249
BHLHE40	0.217351	0.0784478	1.71323	0.091717	0.645381	-4.54292
UBAC1	0.137601	-0.0338729	1.71319	0.0917242	0.645381	-4.54298
OR6W1P	0.23481	-0.00827526	1.71201	0.0919421	0.645861	-4.54478
RIBC1	0.151468	0.00259546	1.71196	0.0919516	0.645861	-4.54485
TRMT112P5	0.15815	-0.0172265	1.71163	0.0920142	0.645969	-4.54537
MTHFD2P3	0.152946	0.00479799	1.71093	0.0921438	0.646201	-4.54644
PHF24	0.147746	0.0363113	1.71057	0.09221	0.646201	-4.54698
SLC39A11	0.179213	0.0783269	1.71033	0.0922558	0.646201	-4.54736
BCAS3	0.149402	-0.0184898	1.70953	0.0924044	0.646201	-4.54858
CCNY	0.207977	0.0451284	1.70752	0.0927786	0.647433	-4.55164
HMGN1P30	0.113683	-0.00728858	1.70724	0.0928305	0.647537	-4.55207
SOGA1	0.178087	-0.00339817	1.70686	0.0929027	0.647544	-4.55265
MT-TQ	0.20451	-0.0927847	1.70612	0.0930403	0.647719	-4.55378
CLCN4	0.210142	0.038209	1.70598	0.0930672	0.647719	-4.55399
SLC8B1	0.224335	0.028795	1.70543	0.0931695	0.647719	-4.55483
ZNF605	0.196353	0.0485714	1.70476	0.0932964	0.647719	-4.55586
LIMA1	0.295765	-0.0590045	1.7047	0.0933065	0.647719	-4.55594
IGHV5-51	0.142204	-0.026943	1.70376	0.0934847	0.648221	-4.55738
TGM7	0.150865	0.0238227	1.70368	0.0934984	0.648221	-4.5575
OR6C71P	0.142153	-0.0591836	1.70182	0.0938494	0.65014	-4.56033
SLC9B1P4	0.130855	0.0199742	1.70149	0.0939105	0.65014	-4.56083
TIGAR	0.192424	-0.0539775	1.70043	0.0941109	0.650261	-4.56244
RPS27P18	0.174231	0.068813	1.70035	0.0941261	0.650261	-4.56256
RPL5P7	0.146313	0.0457208	1.69999	0.0941947	0.650463	-4.56311
MTR	0.175935	-0.0135894	1.69962	0.0942645	0.650669	-4.56367
LPAR6	0.324437	0.0459175	1.69882	0.0944169	0.650669	-4.5649
CYTH1	0.184929	-0.0539921	1.6985	0.0944764	0.650669	-4.56537
ECT2	0.125386	0.0173644	1.69765	0.0946389	0.650669	-4.56667
ECSCR	0.157759	-0.0180021	1.69709	0.0947457	0.650669	-4.56752
LRSAM1	0.123323	-0.018908	1.69672	0.0948156	0.650669	-4.56808
C18orf25	0.197189	-0.0201566	1.69658	0.0948419	0.650669	-4.56829
ARIH1	0.226313	-0.00922414	1.69592	0.0949684	0.650669	-4.5693
HORMAD2	0.133425	-0.00891464	1.69581	0.0949891	0.650669	-4.56947
KBTBD12	0.172569	-0.00983644	1.69564	0.0950217	0.650669	-4.56973
ARRDC5	0.138077	-0.00850853	1.69541	0.095064	0.650669	-4.57006
ANKRD17	0.225339	0.0331695	1.69522	0.0951015	0.650669	-4.57036
CCDC97	0.12468	0.0382627	1.69514	0.095117	0.650669	-4.57048
PHEX-AS1	0.167297	-0.0252324	1.69512	0.0951203	0.650669	-4.57051
SBNO2	0.238866	0.11487	1.695	0.0951427	0.650669	-4.57069
PCCB	0.205036	-0.050424	1.69472	0.0951957	0.650669	-4.57111
RPA2P1	0.13786	0.0240088	1.69428	0.0952812	0.650993	-4.57179
OR7E53P	0.129678	0.0249548	1.69347	0.095435	0.651227	-4.57301
RPL21P44	0.193324	-0.0508238	1.69304	0.0955183	0.651227	-4.57367
CCL1	0.167615	-0.0278146	1.69244	0.0956316	0.651227	-4.57456
HLA-DQB1	0.25287	0.0120188	1.69237	0.0956449	0.651227	-4.57467
IDSP1	0.221226	-0.0386078	1.69234	0.0956523	0.651227	-4.57473
ACTG1P11	0.190611	-0.00198625	1.69223	0.0956732	0.651227	-4.57489
B4GALT7	0.161869	0.0140101	1.69118	0.0958735	0.651441	-4.57647
RORB	0.143699	-0.01287	1.69088	0.0959309	0.651441	-4.57692
KCNE4	0.190483	0.00981636	1.69066	0.0959731	0.651441	-4.57726
POLR2A	0.228029	0.0100362	1.69043	0.0960189	0.651441	-4.57762
CAMK1	0.118619	-0.00231257	1.69032	0.0960387	0.651441	-4.57777
LEXM	0.143906	0.0140939	1.69	0.0961005	0.651698	-4.57826
LONRF2P1	0.139021	-0.0285844	1.68953	0.0961916	0.651821	-4.57897
TBC1D2	0.165728	0.0442242	1.68941	0.0962137	0.651821	-4.57915
NPTX1	0.164895	-0.040276	1.68853	0.0963845	0.652651	-4.58049
ARMCX2	0.148769	0.0149666	1.68826	0.0964351	0.652832	-4.58088
PCED1B	0.170556	0.0466561	1.68794	0.0964975	0.653093	-4.58137
SLC2A3P1	0.25401	-0.0378062	1.68715	0.09665	0.653477	-4.58256
MTRNR2L11	0.19666	0.0286498	1.68679	0.0967205	0.653738	-4.58312
NXPE2	0.349983	-0.0957826	1.68535	0.0969989	0.654402	-4.58529
TWSG1	0.144974	0.0455513	1.68516	0.0970363	0.654402	-4.58558
MATN1	0.139217	0.0591868	1.68465	0.0971343	0.654402	-4.58634
PYGM	0.160752	-0.0869302	1.68445	0.0971728	0.654402	-4.58664
RAPGEF6	0.16702	0.0451136	1.68442	0.0971788	0.654402	-4.58668
CDY7P	0.133162	-0.0149323	1.68427	0.0972086	0.654402	-4.58691
HCLS1	0.163773	-0.0480238	1.6842	0.0972215	0.654402	-4.58702
COL4A2-AS2	0.14658	-0.00216917	1.68419	0.0972237	0.654402	-4.58703
CCDC85C	0.117366	-0.0156126	1.6839	0.0972798	0.654402	-4.58747
SLC22A2	0.148409	-0.0646719	1.68343	0.0973721	0.654402	-4.58818
NBPF25P	0.128799	0.0102242	1.68335	0.0973861	0.654402	-4.58829
KLHL20	0.183264	-0.0118052	1.68264	0.0975251	0.655175	-4.58937
KCNN2	0.19265	0.0161757	1.68213	0.0976248	0.655426	-4.59014
ENDOU	0.12832	-0.0564032	1.68179	0.0976909	0.655426	-4.59065
A2ML1	0.147119	0.00915815	1.68176	0.0976971	0.655426	-4.5907
ARMCX1	0.207591	-0.0284363	1.6815	0.0977475	0.655426	-4.59109
RBPMS-AS1	0.15381	0.0502532	1.68146	0.0977546	0.655426	-4.59114
WNK3	0.153416	-0.0162666	1.68114	0.0978168	0.655526	-4.59162
MCL1	0.182264	-0.0365434	1.68114	0.0978174	0.655526	-4.59163
DUXAP11	0.131427	-0.0153495	1.68074	0.0978953	0.655725	-4.59223
CDK2AP1	0.176899	0.0494687	1.68017	0.098007	0.656313	-4.59309
RD3L	0.135822	-0.0509379	1.67953	0.0981327	0.656832	-4.59405
SLC8A2	0.173977	0.0511558	1.67904	0.0982272	0.656862	-4.59478
IQUB	0.165726	0.00299089	1.67902	0.0982316	0.656862	-4.59481
GNAT2	0.174924	0.0428074	1.67856	0.0983222	0.657295	-4.59551
AMY1C	0.148178	-0.00603315	1.67764	0.0985021	0.657502	-4.59689
FOSL2	0.16809	-0.0457658	1.67724	0.098581	0.657502	-4.59749
COMMD1	0.204464	-0.0125408	1.67717	0.0985941	0.657502	-4.59759
OR51E2	0.198899	-0.022264	1.67618	0.0987896	0.658485	-4.59908
SMIM18	0.1532	-0.056664	1.67605	0.0988141	0.658487	-4.59927
SNRPGP9	0.109407	0.0103374	1.67558	0.0989081	0.658515	-4.59999
RGL4	0.135516	-0.0448305	1.67542	0.0989388	0.658515	-4.60022
TINF2	0.195842	-0.0171729	1.67455	0.0991107	0.659337	-4.60153
UBE2E4P	0.150383	0.0198367	1.67367	0.0992851	0.659782	-4.60285
PIGBOS1	0.143502	0.00296091	1.67353	0.0993113	0.659782	-4.60305
CCBE1	0.186151	0.0394569	1.67313	0.0993919	0.659851	-4.60366
RAB42	0.158849	-0.0107551	1.67233	0.0995489	0.660047	-4.60485
NEK1	0.259147	-0.0224306	1.67201	0.0996127	0.660047	-4.60533
IGLV3-19	0.230451	-0.137381	1.67196	0.0996233	0.660047	-4.60541
TPSD1	0.160761	-0.0207348	1.67193	0.0996283	0.660047	-4.60545
NFIA-AS2	0.193097	-0.0558151	1.67139	0.0997361	0.660053	-4.60627
PSMD8	0.178903	0.0247655	1.67138	0.0997377	0.660053	-4.60628
FUT6	0.358634	0.0289193	1.67122	0.0997692	0.660053	-4.60651
CBLN2	0.160921	-0.0208471	1.67119	0.0997743	0.660053	-4.60655
CASC23	0.154771	0.000471561	1.66883	0.100244	0.661514	-4.61009
RGMB-AS1	0.179943	0.0100989	1.66875	0.100259	0.661514	-4.6102
SLC25A5P1	0.129234	0.0201796	1.66813	0.100385	0.661514	-4.61114
ZNF442	0.205247	0.00925147	1.66725	0.100558	0.662032	-4.61245
MORF4	0.164359	0.0205146	1.66654	0.100701	0.662425	-4.61351
ABCA3	0.187239	-0.0587003	1.66628	0.100752	0.662508	-4.61389
SLC9B1P2	0.202157	0.0199361	1.66601	0.100808	0.662713	-4.61431
C10orf71-AS1	0.160955	0.0318329	1.6658	0.10085	0.662832	-4.61462
PRSS37	0.169068	0.00749302	1.66498	0.101014	0.662975	-4.61585
CEP170P1	0.197553	0.0219926	1.66496	0.101017	0.662975	-4.61587
AHNAK	0.172986	0.0298683	1.66444	0.101122	0.663342	-4.61665
IGSF21	0.169871	0.0164881	1.66394	0.101221	0.663486	-4.61739
HUS1B	0.183418	-0.100441	1.66383	0.101244	0.663486	-4.61756
KCNQ2	0.154082	0.0561121	1.66372	0.101265	0.663486	-4.61772
OGN	0.33179	-0.244322	1.66328	0.101354	0.663587	-4.61837
SLC22A13	0.142465	0.0175246	1.66267	0.101476	0.663593	-4.61928
RTP3	0.11536	-0.0266655	1.66236	0.101539	0.663742	-4.61974
FER1L6	0.179111	0.0105271	1.66195	0.101622	0.663742	-4.62035
KRT18P43	0.160562	-0.0315884	1.6619	0.101631	0.663742	-4.62042
SNORD113-9	0.157996	-0.0294015	1.66171	0.10167	0.663742	-4.62072
NBPF14	0.140003	0.0331537	1.66142	0.101729	0.663742	-4.62115
ANXA2R	0.269086	0.026907	1.66115	0.101783	0.663849	-4.62155
FENDRR	0.277179	-0.144809	1.66044	0.101926	0.663891	-4.6226
OPA1-AS1	0.147272	0.0351689	1.66028	0.101959	0.663891	-4.62285
TPRX1P1	0.17279	-0.0338391	1.66011	0.101993	0.663891	-4.6231
SCIMP	0.333426	-0.0176824	1.65995	0.102026	0.663891	-4.62334
MYL12AP1	0.157553	-0.0157655	1.65908	0.1022	0.664349	-4.62462
DPRXP3	0.202579	0.0279568	1.65853	0.102311	0.664727	-4.62544
ICE2P1	0.145247	-0.0348553	1.65823	0.102373	0.664727	-4.62589
TMEM94	0.161432	0.0602669	1.65794	0.102432	0.664748	-4.62632
CXCL1	0.238802	0.149569	1.65722	0.102578	0.665075	-4.6274
RERGL	0.1556	-0.107888	1.65713	0.102595	0.665075	-4.62752
CHIC1	0.17969	0.0346727	1.65685	0.102653	0.665075	-4.62794
SPINK2	0.115277	0.0153255	1.65647	0.102729	0.665097	-4.6285
CNOT10-AS1	0.134034	-0.0172005	1.6557	0.102886	0.665633	-4.62964
CRYAA	0.172675	0.0177106	1.65559	0.102909	0.665633	-4.62982
USP32	0.171943	0.0551802	1.65495	0.103039	0.665905	-4.63076
SFTPA2	0.100161	0.00319443	1.65486	0.103057	0.665905	-4.63089
BTD	0.203365	0.0469752	1.65467	0.103097	0.665905	-4.63118
ALDH1A2	0.142254	0.0152495	1.65457	0.103118	0.665905	-4.63133
IL2RB	0.127462	-0.00201161	1.65434	0.103163	0.665905	-4.63166
KCNA3	0.177815	-0.115521	1.65433	0.103165	0.665905	-4.63168
FBLIM1	0.126178	-0.00265581	1.65409	0.103214	0.665905	-4.63203
BMP6P1	0.12952	-0.0293984	1.65395	0.103243	0.665905	-4.63224
GMNC	0.169041	-0.050422	1.65362	0.103311	0.665905	-4.63274
CRIM1	0.17247	-0.00442971	1.65329	0.103378	0.665905	-4.63323
RARRES2	0.200584	0.075319	1.65326	0.103383	0.665905	-4.63327
TRAV15	0.147526	-0.000677144	1.65293	0.10345	0.665964	-4.63375
SOSTDC1	0.157418	0.00588519	1.65276	0.103486	0.665964	-4.63401
RPL14P5	0.154922	-0.0025156	1.65234	0.103572	0.665964	-4.63464
IGKV7-3	0.170456	-0.0209573	1.6515	0.103743	0.666053	-4.63587
RPS6P20	0.133142	-0.0482243	1.65134	0.103777	0.666053	-4.63612
CNEP1R1	0.188773	-0.020555	1.65118	0.10381	0.666053	-4.63635
OR51B2	0.131756	-0.0735098	1.65036	0.103978	0.666053	-4.63757
CCDC149	0.144357	-0.0166692	1.65021	0.104008	0.666053	-4.63779
HOXB13	0.171137	0.0275273	1.64991	0.104069	0.666053	-4.63823
MT1DP	0.153375	-0.0209029	1.64959	0.104135	0.6663	-4.6387
COLCA1	0.237166	-0.00034287	1.64851	0.104357	0.667096	-4.6403
FBXO8	0.219407	0.0299984	1.64817	0.104428	0.667392	-4.64081
SAPCD1-AS1	0.159975	-0.0116826	1.64803	0.104456	0.667415	-4.64101
CLEC4G	0.12204	0.0119198	1.64751	0.104564	0.66779	-4.64178
ZNF460	0.224437	-0.0212889	1.64646	0.10478	0.668545	-4.64333
MTCO2P4	0.122609	-0.0425268	1.64591	0.104893	0.668954	-4.64414
WAS	0.213775	0.105531	1.64506	0.105069	0.669617	-4.6454
DLGAP2	0.170038	-0.00190458	1.64465	0.105153	0.669617	-4.64599
FAM172BP	0.153856	-0.0120595	1.64461	0.105161	0.669617	-4.64605
ALKBH5	0.247979	-0.0101174	1.64436	0.105215	0.669617	-4.64643
CLEC4F	0.153822	0.00144326	1.64421	0.105246	0.669617	-4.64666
TMEM82	0.174694	-0.064893	1.64371	0.105349	0.669669	-4.64739
CPLX3	0.132481	-0.0421657	1.64343	0.105408	0.669862	-4.64781
AIF1	0.336426	0.0617102	1.64315	0.105465	0.669938	-4.64821
RGPD4	0.15587	-0.00750273	1.6424	0.10562	0.670457	-4.64931
C9	0.133266	0.017598	1.6421	0.105683	0.670568	-4.64976
DOCK11	0.24466	-0.0461158	1.64208	0.105687	0.670568	-4.64979
ZDHHC20P3	0.108553	-0.000759255	1.64157	0.105793	0.670694	-4.65054
TPRG1L	0.125838	0.00410419	1.64147	0.105814	0.670694	-4.65069
WDR26	0.205082	0.0564359	1.64144	0.10582	0.670694	-4.65073
SPATA3	0.1782	-0.00931497	1.6411	0.105891	0.670694	-4.65123
LRP5L	0.190314	-0.0420364	1.64094	0.105925	0.670694	-4.65147
[truncated: 25,303 more rows]

## Sheet: PP vs CT
Gene	logFC	AveExpr	t	P.Value	adj.P.Val	B
MPZ	0.684283	-0.016426	4.99971	6.57414e-06	0.179487	-1.30296
CES1	0.391177	-0.00152464	4.54659	3.17404e-05	0.433288	-1.76941
HNRNPA1P46	0.340459	0.0389812	4.15323	0.000119017	0.83686	-2.17245
HNRNPH1P2	0.370647	-0.0223389	3.8675	0.000301085	0.83686	-2.46125
SYT10	0.47501	-0.0127956	3.86145	0.000306956	0.83686	-2.46731
ADCYAP1R1	0.378379	0.0167314	3.84945	0.000318941	0.83686	-2.47932
TRIAP1P1	0.339451	-0.0373067	3.71997	0.000480421	0.83686	-2.60829
STMN1P1	0.426325	-0.0018969	3.66798	0.000565249	0.83686	-2.6597
ELMO2	0.530236	-0.0540483	3.65509	0.000588395	0.83686	-2.6724
MLKL	0.441084	-0.00165311	3.62485	0.000646324	0.83686	-2.70216
PRPH	0.430962	-0.0139035	3.62238	0.000651282	0.83686	-2.70458
ALKBH8	0.393443	-0.0290993	3.56682	0.000773091	0.83686	-2.75902
DGKG	0.423382	-0.0927059	3.5655	0.000776228	0.83686	-2.76031
C2orf74	0.509201	-0.0226627	3.55381	0.00080461	0.83686	-2.77172
MIMT1	0.393177	0.113293	3.52366	0.000882415	0.83686	-2.8011
CSRP3	0.398537	-0.00478989	3.50425	0.000936246	0.83686	-2.81996
EFNA2	0.541681	0.0234937	3.5015	0.000944112	0.83686	-2.82262
DSCR9	0.389952	0.0183296	3.48187	0.00100219	0.83686	-2.84165
MMP15	0.440392	0.0682171	3.46614	0.00105116	0.83686	-2.85687
PPP1R2P2	0.378368	0.0401607	3.46532	0.00105378	0.83686	-2.85767
VHLL	0.431394	0.0252757	3.46434	0.00105693	0.83686	-2.85862
EPHA7	0.471172	-0.0348479	3.43749	0.00114629	0.83686	-2.88453
KNDC1	0.516295	0.0252921	3.40698	0.00125653	0.83686	-2.91387
CSRNP1	0.461931	-0.0760595	3.37986	0.00136289	0.83686	-2.93987
TBL1XR1-AS1	0.38431	-0.0130799	3.35675	0.00146025	0.83686	-2.96196
LRCOL1	0.445677	0.0266545	3.35411	0.00147179	0.83686	-2.96448
CDH7	0.376386	-0.033986	3.33781	0.00154487	0.83686	-2.98
PTPRD	0.869821	-0.00786979	3.31485	0.00165373	0.83686	-3.00183
TMEM242	0.414057	0.0118749	3.31446	0.00165563	0.83686	-3.0022
LHX1	0.31157	0.0204256	3.31309	0.00166239	0.83686	-3.0035
MAFF	0.399542	0.0119945	3.28742	0.0017933	0.83686	-3.02782
IGLV3-4	0.337688	-0.0617708	3.28496	0.00180632	0.83686	-3.03014
PTCSC1	0.405552	0.00234895	3.2783	0.00184207	0.83686	-3.03643
WDR7	0.432997	-0.0432922	3.26129	0.00193653	0.83686	-3.05249
TBX18	0.50514	-0.00170076	3.23216	0.00210885	0.83686	-3.07988
RBM15B	0.32772	0.0121977	3.21094	0.00224346	0.83686	-3.09977
STH	0.273721	0.0261995	3.2033	0.00229385	0.83686	-3.10692
IL36A	0.425329	0.0421842	3.20324	0.00229424	0.83686	-3.10697
ZNF281	0.28087	0.0114222	3.16823	0.00253918	0.83686	-3.13961
NPHS2	0.387665	0.0586502	3.15312	0.00265235	0.83686	-3.15365
RPL14P5	0.353833	0.0226798	3.15302	0.00265305	0.83686	-3.15373
OTOP1	0.329383	0.0369508	3.15259	0.00265633	0.83686	-3.15413
PHBP11	0.411716	0.0524633	3.14956	0.00267966	0.83686	-3.15695
MTRNR2L4	0.342799	0.0159035	3.14945	0.00268053	0.83686	-3.15705
NPM1P50	0.353643	0.0567694	3.13268	0.00281292	0.83686	-3.17258
UPK3B	0.36901	0.0904431	3.12909	0.002842	0.83686	-3.17589
FBXW4	0.362922	-0.0231959	3.12367	0.00288658	0.83686	-3.18091
ZNF774	0.407839	0.0287152	3.1199	0.00291789	0.83686	-3.18438
CYP4Z2P	0.377887	-0.0266593	3.11284	0.00297751	0.83686	-3.1909
C8orf86	0.351035	0.0589303	3.09966	0.00309175	0.83686	-3.20304
NLRC5	0.424659	0.0481846	3.09918	0.00309603	0.83686	-3.20348
ZNF729	0.390381	0.0267032	3.09551	0.00312861	0.83686	-3.20686
CDK18	0.347747	-0.0359257	3.08625	0.00321224	0.83686	-3.21536
ARX	0.336272	0.0094514	3.08365	0.00323609	0.83686	-3.21775
AGXT	0.323538	-0.0190375	3.06226	0.00343876	0.83686	-3.23734
OR13D3P	0.30128	0.0194713	3.0609	0.00345206	0.83686	-3.23859
SKOR2	0.260171	-0.0854673	3.05836	0.00347705	0.83686	-3.24091
GOLGA2P5	0.318151	-0.0156052	3.05772	0.00348335	0.83686	-3.2415
ZNF831	0.313377	0.00639065	3.05184	0.00354185	0.83686	-3.24687
CTSLP2	0.299252	-0.0199955	3.05174	0.0035428	0.83686	-3.24696
C1QA	0.32381	-0.0459316	3.04959	0.00356446	0.83686	-3.24892
INMT	0.375513	0.0182384	3.03502	0.00371417	0.83686	-3.2622
C22orf23	0.314922	0.0464602	3.03354	0.00372973	0.83686	-3.26355
SLC10A4	0.370841	0.0107606	3.03195	0.00374652	0.83686	-3.265
MYCL	0.321744	0.0449901	3.01958	0.00387926	0.83686	-3.27624
WFDC6	0.387164	0.0563988	3.01168	0.00396643	0.83686	-3.28341
ARHGEF11	0.360414	0.00675734	3.00513	0.00403992	0.83686	-3.28934
USP17L10	0.42784	-0.020359	3.0011	0.0040859	0.83686	-3.29299
SLC27A4	0.301495	0.0161727	2.99968	0.00410224	0.83686	-3.29428
IGLV3-6	0.36213	0.028052	2.99417	0.004166	0.83686	-3.29926
TBCB	0.278209	0.0400289	2.99275	0.00418263	0.83686	-3.30055
ENO1-AS1	0.328827	-0.0225219	2.99169	0.00419504	0.83686	-3.3015
IPO9	0.389311	0.0592992	2.99123	0.00420043	0.83686	-3.30192
DGCR12	0.418882	0.0291887	2.9911	0.00420194	0.83686	-3.30203
MAP3K10	0.308424	0.0212938	2.99045	0.00420964	0.83686	-3.30262
COX6CP16	0.265788	-0.00825646	2.98775	0.00424152	0.83686	-3.30506
FRAT1	0.316685	0.10147	2.98671	0.00425387	0.83686	-3.306
CLCN7	0.432359	-0.016747	2.98312	0.00429676	0.83686	-3.30924
BTBD11	0.380658	-0.0310383	2.97074	0.00444781	0.83686	-3.3204
TSPY24P	0.254204	0.0239993	2.97007	0.00445601	0.83686	-3.32099
TSPAN33	0.389933	0.0478584	2.96866	0.00447357	0.83686	-3.32226
MAFK	0.350456	0.027442	2.96864	0.00447385	0.83686	-3.32228
SERPINA7P1	0.350192	-0.0286949	2.96558	0.00451214	0.83686	-3.32504
ISM1	0.37314	-0.025632	2.94446	0.00478485	0.83686	-3.344
GSTA10P	0.393616	0.00786359	2.94149	0.00482444	0.83686	-3.34666
FRMD8P1	0.336681	-0.0433771	2.94133	0.00482662	0.83686	-3.3468
ZNF733P	0.306319	0.00968761	2.94038	0.00483927	0.83686	-3.34765
SLC6A3	0.377334	0.0586778	2.93683	0.00488706	0.83686	-3.35083
DNM1P35	0.285648	0.0435234	2.92118	0.00510317	0.83686	-3.36481
LRRN2	0.394803	-0.0357323	2.91895	0.00513472	0.83686	-3.3668
MRPS16P2	0.331178	-0.0488519	2.91831	0.00514375	0.83686	-3.36737
SNORD4A	0.572948	0.207127	2.90983	0.00526553	0.83686	-3.37493
RNF152P1	0.271473	-0.0343229	2.90754	0.00529885	0.83686	-3.37697
MSN	0.394263	0.00868619	2.90166	0.00538515	0.83686	-3.38219
ISX	0.303625	0.0245175	2.90082	0.00539765	0.83686	-3.38294
MOGAT1	0.389835	0.0867318	2.90019	0.00540705	0.83686	-3.3835
VENTXP1	0.246283	0.0136171	2.89617	0.00546704	0.83686	-3.38707
PKLR	0.27408	0.0250039	2.88917	0.00557318	0.83686	-3.39329
C19orf47	0.383197	0.0180229	2.88168	0.00568876	0.83686	-3.39992
COL5A1-AS1	0.367294	0.0487207	2.88129	0.00569483	0.83686	-3.40027
CECR9	0.32069	0.000539762	2.87989	0.00571668	0.83686	-3.4015
IGLV10-67	0.341444	-0.0156266	2.87515	0.00579143	0.83686	-3.4057
ADGRF2	0.259454	0.0216722	2.87266	0.005831	0.83686	-3.40791
ZBTB46-AS1	0.243426	-0.0284986	2.87167	0.00584666	0.83686	-3.40877
CYP4F12	0.378482	0.0693128	2.87155	0.00584863	0.83686	-3.40888
LRFN5	0.258852	-0.00380543	2.86936	0.00588378	0.83686	-3.41082
CYP4F24P	0.33313	0.0531764	2.86304	0.00598612	0.83686	-3.41639
GFI1	0.323518	-0.0128572	2.86015	0.00603351	0.83686	-3.41894
FGF10	0.278446	-0.0576245	2.85535	0.006113	0.83686	-3.42318
CRX	0.311432	-0.0375169	2.85381	0.00613872	0.83686	-3.42453
SMTNL1	0.267195	0.0272831	2.84145	0.00634865	0.83686	-3.43541
SLC13A5	0.345386	0.00416824	2.83792	0.00640976	0.83686	-3.4385
SLC9A3R2	0.348669	0.0802688	2.82462	0.00664515	0.83686	-3.45017
NDUFB4P6	0.388088	0.0503401	2.82211	0.00669044	0.83686	-3.45236
ACSM2B	0.303632	0.0154811	2.82059	0.00671814	0.83686	-3.4537
HMGB3P6	0.376963	0.00779047	2.81621	0.00679817	0.83686	-3.45753
SPAM1	0.351807	-0.0035796	2.81533	0.00681424	0.83686	-3.45829
TAT	0.316941	-0.0548444	2.81166	0.0068823	0.83686	-3.4615
BCL7A	0.44286	0.0300685	2.80138	0.00707566	0.83686	-3.47046
MTRNR2L13	0.460209	0.0787122	2.79862	0.00712865	0.83686	-3.47288
KLF1	0.366431	0.0425009	2.79766	0.00714711	0.83686	-3.47371
NAGS	0.35428	0.00941624	2.79603	0.00717846	0.83686	-3.47513
CCR8	0.319619	0.0251087	2.79562	0.0071863	0.83686	-3.47548
SNAR-I	0.426536	0.062708	2.79533	0.00719192	0.83686	-3.47573
SCRT1	0.362617	0.0532883	2.79385	0.00722078	0.83686	-3.47703
FAUP2	0.362619	0.105847	2.78863	0.00732277	0.83686	-3.48157
SUV39H1	0.32415	0.113935	2.78828	0.00732962	0.83686	-3.48187
CYP2A13	0.276663	0.0286686	2.78767	0.00734169	0.83686	-3.4824
SPATA20	0.292572	-0.0650278	2.78624	0.00737001	0.83686	-3.48364
DAGLA	0.370668	0.0714867	2.77531	0.0075892	0.83686	-3.49312
ACTG1P3	0.371751	-0.0511955	2.76984	0.00770141	0.83686	-3.49787
RPL7L1P12	0.323882	0.0136916	2.76901	0.00771847	0.83686	-3.49858
SPSB1	0.259883	-0.0157615	2.76608	0.00777913	0.83686	-3.50112
EVC2	0.413876	-0.0240377	2.765	0.00780164	0.83686	-3.50205
TEX22	0.354237	0.00880772	2.76459	0.00781018	0.83686	-3.5024
C22orf39	0.288237	-0.00313404	2.76268	0.0078502	0.83686	-3.50406
SLIT2-IT1	0.298767	-0.0556395	2.76196	0.00786538	0.83686	-3.50468
SPATA6L	0.275167	0.00139764	2.76011	0.00790435	0.83686	-3.50628
ZBTB12BP	0.365148	0.00840146	2.75924	0.0079227	0.83686	-3.50703
GLYATL1	0.337058	-0.030937	2.75137	0.00809101	0.83686	-3.51383
EML2-AS1	0.29365	0.022622	2.75091	0.00810086	0.83686	-3.51422
ITGA10	0.258349	-0.0173035	2.75035	0.00811284	0.83686	-3.5147
SUN3	0.353764	0.073118	2.7497	0.00812701	0.83686	-3.51526
ADAMTS14	0.246379	-0.0104274	2.74714	0.00818274	0.83686	-3.51747
ACVR2B	0.415394	-0.0449053	2.74206	0.00829413	0.83686	-3.52185
COX4I1P2	0.40711	-0.00320533	2.74201	0.0082953	0.83686	-3.52189
CPLX2	0.349059	0.0117667	2.7404	0.00833086	0.83686	-3.52327
MYO16-AS2	0.300048	-0.0060442	2.73059	0.00855091	0.83686	-3.5317
FAM153A	0.390271	0.0311743	2.73003	0.00856365	0.83686	-3.53219
A4GNT	0.290577	-0.0198649	2.72828	0.00860356	0.83686	-3.53369
WASF5P	0.290244	0.000297917	2.72751	0.00862106	0.83686	-3.53435
SOX1	0.41871	-0.0142958	2.72464	0.00868682	0.83686	-3.5368
KRT8P12	0.295564	0.0314681	2.72074	0.00877726	0.83686	-3.54015
RFPL4AP6	0.299161	0.0333809	2.71742	0.00885462	0.83686	-3.54299
ANKRD30BP2	0.334223	-0.0447402	2.70367	0.00918236	0.83686	-3.55474
SLC5A4	0.314907	0.0108617	2.7009	0.00924993	0.83686	-3.55711
C2orf66	0.366874	0.0374221	2.69661	0.00935504	0.83686	-3.56076
CTAGE15	0.339939	-0.0250364	2.69647	0.00935857	0.83686	-3.56089
ZNF479	0.317316	-0.00342745	2.69602	0.00936963	0.83686	-3.56127
GAPDHP53	0.364572	-0.0139626	2.69159	0.00947967	0.83686	-3.56504
OR10A5	0.33569	0.0436093	2.68978	0.00952489	0.83686	-3.56658
SIGLEC17P	0.24689	-0.0438434	2.68524	0.00963936	0.83686	-3.57044
HIVEP2	0.511366	-0.164733	2.68482	0.00964998	0.83686	-3.5708
OR4K5	0.2788	-0.0525584	2.67697	0.00985099	0.83686	-3.57746
HAGHL	0.361061	0.00197688	2.67684	0.00985441	0.83686	-3.57758
SNAR-C4	0.4559	0.124613	2.67615	0.00987218	0.83686	-3.57816
GGNBP1	0.284384	0.0122933	2.67491	0.00990435	0.83686	-3.57921
ZNF213	0.308712	0.0238731	2.67248	0.00996754	0.83686	-3.58127
TRIM43	0.334398	0.00374778	2.66879	0.0100646	0.83686	-3.5844
LIN7A	0.408741	-0.0592567	2.6648	0.0101702	0.83686	-3.58777
ADGRG4	0.383275	-0.0147645	2.66471	0.0101725	0.83686	-3.58784
HMGN1P34	0.300947	-0.0816761	2.66402	0.010191	0.83686	-3.58843
HECW1-IT1	0.335879	-0.053497	2.66295	0.0102197	0.83686	-3.58934
OR2AK2	0.349499	0.0228584	2.66181	0.0102502	0.83686	-3.5903
CLEC4G	0.255653	0.0322605	2.65906	0.0103241	0.83686	-3.59263
GPATCH2L	0.35261	0.00404225	2.65887	0.0103291	0.83686	-3.59278
RPAIN	0.382262	0.0536461	2.65593	0.0104089	0.83686	-3.59527
HNRNPA3	0.239202	0.0277896	2.65576	0.0104134	0.83686	-3.59541
PRLR	0.505959	-0.00861554	2.65522	0.0104281	0.83686	-3.59586
NAT16	0.316001	0.0233322	2.655	0.010434	0.83686	-3.59605
ENDOU	0.306147	-0.0383949	2.65486	0.010438	0.83686	-3.59617
FAM153B	0.290722	-0.0241626	2.65439	0.0104509	0.83686	-3.59657
CISD1P1	0.308299	0.0390001	2.65358	0.010473	0.83686	-3.59725
ZBED9	0.299177	0.0698467	2.65178	0.0105223	0.83686	-3.59877
ZAN	0.285307	-0.0308388	2.64507	0.010708	0.83686	-3.60443
SNAR-C3	0.59024	0.19459	2.64244	0.0107816	0.83686	-3.60664
FOSL2	0.309325	-0.0385869	2.64148	0.0108084	0.83686	-3.60744
DHRS4	0.241097	0.0263737	2.63833	0.0108974	0.83686	-3.61009
MPZL3	0.254939	0.0360953	2.62878	0.0111713	0.83686	-3.61811
DHX33	0.376417	-0.00627265	2.62775	0.0112011	0.83686	-3.61897
ADORA2A-AS1	0.245615	-0.0387166	2.62699	0.0112233	0.83686	-3.61961
LONRF2	0.340461	0.00774546	2.62694	0.0112248	0.83686	-3.61966
FOLH1B	0.269289	-0.0347143	2.6225	0.011355	0.83686	-3.62338
ARL5A	0.33542	0.0555635	2.61656	0.0115311	0.83686	-3.62835
TP73	0.329757	-0.0122408	2.6152	0.0115715	0.83686	-3.62949
TBATA	0.363393	0.00678349	2.61473	0.0115856	0.83686	-3.62988
MSX1	0.33399	0.0641937	2.61038	0.0117169	0.83686	-3.63352
UBE2Q1-AS1	0.301187	-0.00045767	2.61006	0.0117265	0.83686	-3.63378
OR5AK2	0.231987	-0.0130222	2.6095	0.0117434	0.83686	-3.63425
MED11	0.359335	0.0267469	2.60949	0.0117439	0.83686	-3.63426
RAPGEF3	0.350364	-0.082648	2.60643	0.0118371	0.83686	-3.63682
OR4K4P	0.238927	0.010538	2.60632	0.0118403	0.83686	-3.6369
PDZRN3-AS1	0.267711	-0.0311055	2.60587	0.0118542	0.83686	-3.63728
GPR162	0.370742	0.0519547	2.60399	0.0119119	0.83686	-3.63885
RPSAP59	0.343853	-0.0203313	2.60296	0.0119436	0.83686	-3.63971
SDR39U1	0.244191	-0.0043435	2.60077	0.0120113	0.83686	-3.64153
TP53TG3C	0.268319	-0.0168799	2.59757	0.0121108	0.83686	-3.6442
AMY1A	0.256396	-0.0574397	2.59683	0.0121338	0.83686	-3.64481
ZNF48	0.249191	-0.0762498	2.59561	0.012172	0.83686	-3.64583
CYCSP53	0.296457	-0.0118167	2.59483	0.0121965	0.83686	-3.64648
GLOD5	0.296865	0.016781	2.59279	0.0122607	0.83686	-3.64817
NYNRIN	0.368984	0.0666025	2.5897	0.0123587	0.83686	-3.65074
SNORD114-20	0.381399	-0.202405	2.58929	0.0123717	0.83686	-3.65108
DLX2	0.256286	-0.00877308	2.58727	0.0124363	0.83686	-3.65276
SNAR-E	0.523372	0.221018	2.58463	0.0125208	0.83686	-3.65495
PIGX	0.380154	0.0251227	2.58331	0.0125634	0.83686	-3.65605
PRRT2	0.322025	0.0655306	2.57829	0.0127264	0.83686	-3.66021
CFAP74	0.338516	0.0213772	2.574	0.0128674	0.83686	-3.66377
IGFBP1	0.300323	0.0190999	2.57158	0.0129472	0.83686	-3.66577
TCF7L1-IT1	0.378093	-0.0456217	2.57109	0.0129638	0.83686	-3.66618
UQCRC1	0.314548	0.0642548	2.57074	0.0129753	0.83686	-3.66647
PRDX3P2	0.259005	0.0446991	2.56899	0.0130336	0.83686	-3.66791
CRYGN	0.283284	0.00902911	2.56878	0.0130406	0.83686	-3.66808
IL1A	0.343038	0.0317561	2.55902	0.0133703	0.83686	-3.67614
USP3-AS1	0.288075	-0.0346521	2.55877	0.0133788	0.83686	-3.67635
SNAR-G2	0.544537	0.184545	2.5578	0.0134119	0.83686	-3.67715
GUSBP5	0.291846	-0.0375325	2.5531	0.013574	0.83686	-3.68103
MCRS1	0.290903	-0.0363453	2.55115	0.0136417	0.83686	-3.68263
P3H4	0.286945	-0.00995322	2.54929	0.0137063	0.83686	-3.68416
CDC42EP4	0.354249	0.0202292	2.54759	0.0137659	0.83686	-3.68556
STAG3	0.319467	0.0147248	2.54752	0.0137682	0.83686	-3.68561
TMTC4	0.334933	0.169733	2.54735	0.0137745	0.83686	-3.68576
IFT27	0.431173	0.0821027	2.54307	0.0139254	0.83686	-3.68927
SPACA1	0.313524	0.0367027	2.53995	0.0140362	0.83686	-3.69183
CLDN17	0.266931	0.0565376	2.53961	0.0140483	0.83686	-3.69211
LYSMD4	0.343108	-0.0271413	2.53921	0.0140626	0.83686	-3.69244
FAM187B2P	0.287763	0.0442801	2.53862	0.0140839	0.83686	-3.69293
SNORD29	0.300545	-0.0232692	2.53475	0.014223	0.83686	-3.6961
MTND3P7	0.313127	0.044029	2.53211	0.0143189	0.83686	-3.69827
EN2	0.32161	0.0367981	2.5312	0.0143519	0.83686	-3.69901
DCAF12L2	0.300641	-0.00487053	2.53093	0.0143618	0.83686	-3.69923
NXN	0.275612	0.00588611	2.52966	0.0144081	0.83686	-3.70027
SNAR-D	0.36589	0.128681	2.52961	0.01441	0.83686	-3.70031
TINCR	0.278236	-0.0303744	2.52808	0.0144658	0.83686	-3.70156
MTND4P19	0.29549	-0.0241728	2.52791	0.0144723	0.83686	-3.7017
ZNF404	0.290491	0.0125604	2.52425	0.0146072	0.83686	-3.7047
HNRNPA1P18	0.254661	0.0245967	2.52351	0.0146346	0.83686	-3.7053
RPL17P35	0.296568	0.0155025	2.52283	0.0146598	0.83686	-3.70586
IZUMO2	0.268998	0.0815842	2.51831	0.0148283	0.83686	-3.70954
SYT7	0.32357	0.0375352	2.51642	0.0148996	0.83686	-3.71109
FAM124A	0.245791	0.0418029	2.51495	0.0149551	0.83686	-3.71229
C9orf50	0.34044	0.0462992	2.51293	0.0150314	0.83686	-3.71393
EI24P3	0.292728	-0.0143796	2.51111	0.0151008	0.83686	-3.71541
HCN1	0.310712	0.0207202	2.50848	0.0152013	0.83686	-3.71756
GDNF	0.249282	-0.0228463	2.50787	0.0152251	0.83686	-3.71806
KRT18P67	0.271209	-0.0181229	2.50532	0.0153232	0.83686	-3.72013
KRT8P24	0.264867	-0.0353936	2.50445	0.015357	0.83686	-3.72084
DDX23	0.286053	0.00600131	2.50295	0.0154149	0.83686	-3.72205
CHMP6	0.30836	-0.0171869	2.50275	0.0154228	0.83686	-3.72222
ZSWIM5P3	0.325107	0.015376	2.50219	0.0154446	0.83686	-3.72268
KRT16P4	0.28116	0.0490732	2.49689	0.0156522	0.83686	-3.72698
NKX2-1	0.341604	0.0335383	2.49535	0.0157129	0.83686	-3.72823
AQP12A	0.256567	0.00970278	2.49361	0.0157819	0.83686	-3.72964
PKD2L1	0.248586	0.0199407	2.49336	0.015792	0.83686	-3.72985
REM1	0.30763	0.0522347	2.49333	0.015793	0.83686	-3.72987
MTCO2P5	0.301561	0.00365334	2.4912	0.015878	0.83686	-3.7316
LTBP2	0.282674	0.0464932	2.48976	0.0159355	0.83686	-3.73276
EPN3	0.357053	0.0442706	2.48965	0.0159397	0.83686	-3.73285
TRIM71	0.285837	-0.00165073	2.4871	0.0160423	0.83686	-3.73492
SPDYE5	0.275988	-0.0803637	2.48358	0.0161849	0.83686	-3.73777
ADAMTSL1	0.263947	-0.0563013	2.48345	0.0161899	0.83686	-3.73787
UBASH3A	0.25922	-0.0228245	2.48191	0.0162528	0.83686	-3.73912
FMO10P	0.278889	0.00866644	2.48106	0.0162873	0.83686	-3.7398
PRG3	0.358198	0.0224809	2.48099	0.0162904	0.83686	-3.73986
GAGE2D	0.250097	-0.0571121	2.47922	0.0163627	0.83686	-3.74129
PCCB	0.366449	-0.0442308	2.47795	0.0164151	0.83686	-3.74232
GATA5	0.344977	0.0551659	2.46807	0.016826	0.83686	-3.75029
DDX11L16	0.441358	0.0285742	2.46778	0.0168381	0.83686	-3.75052
SLC5A9	0.359142	0.0809866	2.46675	0.0168814	0.83686	-3.75135
SNRPGP6	0.337359	-0.00948911	2.46567	0.0169272	0.83686	-3.75222
GPR108	0.266254	-0.0050194	2.46344	0.0170218	0.83686	-3.75401
USP35	0.228741	0.0328679	2.46204	0.0170812	0.83686	-3.75514
RAD51-AS1	0.301435	-0.0651219	2.46148	0.0171051	0.83686	-3.75559
STAP2	0.360034	0.0521327	2.46122	0.0171162	0.83686	-3.75579
TMEM191A	0.299778	0.0782612	2.46057	0.0171442	0.83686	-3.75632
TMEM9	0.272429	0.053822	2.46017	0.0171613	0.83686	-3.75664
NKX2-4	0.287067	0.106024	2.45701	0.0172969	0.83686	-3.75918
TMPO-AS1	0.343179	0.0702644	2.45686	0.0173035	0.83686	-3.7593
NUTF2	0.353826	0.194485	2.45666	0.0173124	0.83686	-3.75946
ORC6	0.300713	0.00131851	2.45643	0.0173221	0.83686	-3.75965
ITPKA	0.316394	-0.0212858	2.45607	0.0173375	0.83686	-3.75993
SPATA8	0.317268	0.0260317	2.45021	0.0175924	0.83686	-3.76463
MLECP1	0.356219	-0.0366456	2.44989	0.0176065	0.83686	-3.76489
CYLC2	0.356763	-0.0220585	2.44969	0.0176153	0.83686	-3.76505
FLG	0.266166	-0.0206393	2.44787	0.0176951	0.83686	-3.76651
EFCAB3	0.319371	0.0109404	2.44728	0.0177215	0.83686	-3.76699
SS18L1	0.32365	-0.00637053	2.4451	0.0178178	0.83686	-3.76873
ARSD	0.399379	-0.0215155	2.44337	0.0178946	0.83686	-3.77012
TINAGL1	0.322857	0.0662248	2.44209	0.0179513	0.83686	-3.77114
ADAM3A	0.293612	-0.0272846	2.44204	0.0179535	0.83686	-3.77118
FOXD4	0.34496	0.0692672	2.43955	0.018065	0.83686	-3.77317
DTX1	0.34644	0.0298651	2.43914	0.0180833	0.83686	-3.77349
PRR12	0.270343	-0.0333116	2.4386	0.0181075	0.83686	-3.77393
FCGRT	0.320726	-0.0388639	2.43833	0.0181197	0.83686	-3.77414
CFAP99	0.298133	0.0848207	2.43791	0.0181388	0.83686	-3.77448
KAAG1	0.331482	0.0644184	2.43523	0.0182597	0.83686	-3.77662
HSPB8	0.298604	-0.111813	2.43222	0.0183963	0.83686	-3.77902
ADM	0.302947	0.00536967	2.43183	0.0184145	0.83686	-3.77934
ZNF420	0.309718	-0.0423552	2.4317	0.0184202	0.83686	-3.77944
CPA1	0.268857	-0.053908	2.4316	0.0184246	0.83686	-3.77951
ZFYVE26	0.269022	0.0140293	2.43119	0.0184435	0.83686	-3.77984
FAM133A	0.339019	0.00904272	2.43035	0.0184818	0.83686	-3.78051
GTF2F1	0.295274	0.0309832	2.42959	0.0185167	0.83686	-3.78112
FAM47C	0.307087	0.056804	2.42569	0.0186965	0.83686	-3.78423
PHKA2	0.335597	0.0874507	2.42511	0.018723	0.83686	-3.78468
CIRBP-AS1	0.228262	0.0162669	2.42445	0.018754	0.83686	-3.78522
NME9	0.283048	-0.00335332	2.42085	0.0189215	0.83686	-3.78808
KCNF1	0.239927	-0.0421479	2.42083	0.0189225	0.83686	-3.78809
CYP4F30P	0.28591	0.0590396	2.42069	0.0189288	0.83686	-3.7882
ODF4	0.279629	-0.00795544	2.41991	0.0189656	0.83686	-3.78883
DNM1P34	0.274056	-0.0505076	2.41925	0.0189965	0.83686	-3.78935
TLE2	0.288718	-0.0156086	2.41782	0.0190638	0.83686	-3.79049
TLE6	0.328303	-0.0332145	2.41735	0.0190859	0.83686	-3.79086
RASL12	0.323185	0.00997798	2.41678	0.0191125	0.83686	-3.79131
SERTM1	0.291901	0.0410256	2.41313	0.0192854	0.83686	-3.79421
DNLZ	0.326748	0.0252793	2.41296	0.0192937	0.83686	-3.79434
IGKV1OR2-108	0.31257	-0.0384524	2.4128	0.0193015	0.83686	-3.79447
SETP4	0.251489	0.00723218	2.41204	0.0193377	0.83686	-3.79508
TREH	0.313099	-0.00213015	2.41161	0.0193579	0.83686	-3.79541
COL18A1-AS1	0.258294	0.0148863	2.41134	0.0193711	0.83686	-3.79563
KCNN4	0.326493	-0.000166601	2.4094	0.0194635	0.83686	-3.79716
PAFAH1B3	0.219624	0.1147	2.40802	0.0195302	0.83686	-3.79826
IPO4	0.342663	0.0943228	2.40467	0.0196918	0.83686	-3.80091
TEX2	0.276529	0.0789561	2.40253	0.0197959	0.83686	-3.80261
ZNF861P	0.346814	-0.0459529	2.40236	0.0198041	0.83686	-3.80274
DUS2	0.327619	0.0713637	2.39905	0.0199657	0.83686	-3.80536
ZNF833P	0.240885	0.0216348	2.39841	0.0199974	0.83686	-3.80587
OR7E130P	0.240805	-0.00091727	2.39814	0.0200107	0.83686	-3.80608
LYPD5	0.272486	0.0302614	2.39744	0.0200451	0.83686	-3.80663
NRBF2	0.262698	0.0441846	2.3974	0.0200468	0.83686	-3.80666
FOXD4L1	0.316873	0.00767597	2.39397	0.0202165	0.83686	-3.80937
KRT18P12	0.237799	0.100567	2.3937	0.0202301	0.83686	-3.80959
ANO1	0.441629	-0.0507391	2.39342	0.0202439	0.83686	-3.8098
INHBE	0.260968	0.00908418	2.38991	0.0204188	0.83686	-3.81257
WIF1	0.423172	0.0418762	2.38695	0.0205678	0.83686	-3.81491
RPL3P11	0.287784	0.0505246	2.38601	0.0206152	0.83686	-3.81565
FRG2LP	0.291312	-0.00777466	2.38509	0.0206615	0.83686	-3.81637
CBLC	0.36276	0.0751501	2.38387	0.0207236	0.83686	-3.81733
RNGTTP1	0.304286	-0.0387451	2.38339	0.020748	0.83686	-3.81771
C7orf50	0.264394	0.0269884	2.38315	0.0207602	0.83686	-3.8179
NSMCE1	0.342081	0.0285213	2.3828	0.020778	0.83686	-3.81818
HCG19P	0.360094	0.0384092	2.38188	0.0208247	0.83686	-3.8189
ACCS	0.338979	0.0531366	2.37868	0.020988	0.83686	-3.82141
TRDJ3	0.309938	-0.0170344	2.37787	0.0210296	0.83686	-3.82204
HLA-K	0.254736	-0.0112875	2.37737	0.0210555	0.83686	-3.82244
TM2D2	0.32111	0.07048	2.37582	0.0211356	0.83686	-3.82366
POLI	0.302495	-0.117118	2.37451	0.0212034	0.83686	-3.82469
DNMT3B	0.292076	0.0294937	2.37424	0.0212172	0.83686	-3.8249
TSPY13P	0.284736	0.0582997	2.37417	0.0212207	0.83686	-3.82495
TDGF1P4	0.308354	0.0135471	2.3733	0.0212658	0.83686	-3.82563
ZNF750	0.324737	0.102607	2.37141	0.0213643	0.83686	-3.82712
PTCHD3P1	0.281598	-0.000143845	2.37023	0.0214259	0.83686	-3.82804
NKX2-2	0.285046	-0.0220401	2.36569	0.0216646	0.83686	-3.8316
TSHB	0.241131	-0.0927397	2.36331	0.0217903	0.83686	-3.83346
SPATA8-AS1	0.250305	-0.0331595	2.36102	0.0219124	0.83686	-3.83525
ZNF582-AS1	0.350838	-0.00516687	2.36048	0.021941	0.83686	-3.83567
ARHGEF25	0.282369	-0.0251658	2.3593	0.022004	0.83686	-3.83659
HLTF-AS1	0.274078	0.0172159	2.35889	0.0220259	0.83686	-3.83691
MYCBP2-AS2	0.279775	0.00929294	2.35848	0.0220483	0.83686	-3.83724
MTND3P2	0.331765	0.0529455	2.35734	0.0221093	0.83686	-3.83813
UMODL1	0.3209	-0.0514953	2.35576	0.0221942	0.83686	-3.83936
FLJ12825	0.387376	0.0113273	2.3557	0.0221979	0.83686	-3.83941
GRAP2	0.272606	0.01835	2.35493	0.022239	0.83686	-3.84
OR52I1	0.246207	-0.040195	2.3541	0.0222844	0.83686	-3.84066
CABP2	0.253795	0.0312781	2.35211	0.0223919	0.83686	-3.8422
KRT18P4	0.279876	0.0393738	2.35066	0.0224709	0.83686	-3.84333
SEMA4A	0.278698	0.0183892	2.35052	0.0224788	0.83686	-3.84345
KRT16P2	0.213789	0.00610004	2.35043	0.0224835	0.83686	-3.84351
SPDYE12P	0.239683	0.0505072	2.35028	0.0224919	0.83686	-3.84363
HNRNPA1P76	0.293958	0.0337775	2.35011	0.022501	0.83686	-3.84376
OR55B1P	0.339556	0.00688132	2.34955	0.0225316	0.83686	-3.8442
ITGA11	0.274182	0.0525143	2.34802	0.0226155	0.83686	-3.84539
CTF2P	0.256319	0.05956	2.34715	0.0226635	0.83686	-3.84607
ARFIP2	0.219073	0.0351907	2.34692	0.0226762	0.83686	-3.84625
GAPDHP24	0.311726	0.0202753	2.34659	0.0226943	0.83686	-3.84651
CALCB	0.328108	0.0281494	2.34648	0.0227003	0.83686	-3.8466
HNRNPA1P24	0.303447	0.0399505	2.34612	0.02272	0.83686	-3.84687
MAN2A2	0.293638	0.03086	2.3451	0.022776	0.83686	-3.84766
GPR20	0.263167	0.0301478	2.34409	0.0228318	0.83686	-3.84845
ZNF850	0.432721	0.148001	2.34188	0.0229544	0.83686	-3.85017
CCL1	0.295652	-0.0252353	2.34001	0.0230589	0.83686	-3.85162
GPATCH3	0.277869	0.0337965	2.33984	0.0230685	0.83686	-3.85176
CH17-125A10.2	0.25175	-0.0186489	2.33967	0.0230776	0.83686	-3.85189
OR10G5P	0.345831	0.0114898	2.33963	0.0230803	0.83686	-3.85192
PPP1R9B	0.302025	-0.0354914	2.33947	0.0230892	0.83686	-3.85205
PMCHL1	0.240423	0.0063228	2.33772	0.0231868	0.83686	-3.8534
IGFBP2	0.317752	0.0140499	2.33757	0.0231954	0.83686	-3.85352
GPSM3	0.230101	0.0277372	2.33563	0.0233047	0.83686	-3.85503
DEFB126	0.292557	0.0628227	2.33213	0.0235023	0.83686	-3.85774
SPACA4	0.257587	0.0611144	2.33212	0.0235028	0.83686	-3.85774
RELB	0.333229	0.0425224	2.3321	0.0235041	0.83686	-3.85776
EGFL6	0.289666	0.0302708	2.33151	0.023538	0.83686	-3.85822
HSPD1P9	0.297159	-0.0114473	2.33079	0.0235787	0.83686	-3.85878
BTBD17	0.247107	0.0307626	2.32834	0.0237184	0.83686	-3.86067
C5orf49	0.242226	0.0175021	2.32804	0.0237356	0.83686	-3.8609
OR7E90P	0.277173	-0.00753655	2.32731	0.0237779	0.83686	-3.86148
CACNG7	0.33253	-0.0369238	2.32474	0.0239256	0.83686	-3.86346
FAAH2	0.231558	-0.013551	2.32425	0.0239538	0.83686	-3.86384
MOS	0.282732	-0.0535452	2.32384	0.0239773	0.83686	-3.86415
NKX6-3	0.243877	0.0156266	2.32199	0.0240846	0.83686	-3.86559
SLC25A24P1	0.292681	-0.0139657	2.32033	0.0241812	0.83686	-3.86687
NGF	0.242119	0.0721248	2.31796	0.0243195	0.83686	-3.8687
RPL21P8	0.324773	0.0162847	2.3166	0.0243993	0.83686	-3.86975
ADORA2B	0.312807	0.059063	2.3157	0.024452	0.83686	-3.87044
FRG2C	0.299586	0.0525184	2.31296	0.0246139	0.83686	-3.87255
UNC5B	0.32034	0.00729711	2.31156	0.024697	0.83686	-3.87364
MECP2	0.252625	0.0206097	2.31058	0.024755	0.83686	-3.87439
HRC	0.235598	0.0191688	2.30938	0.0248263	0.83686	-3.87531
SLC26A2	0.391301	-0.25771	2.30915	0.0248399	0.83686	-3.87548
CTBP2P6	0.298328	0.0599965	2.30893	0.0248534	0.83686	-3.87566
SOX14	0.268715	-0.0308688	2.30583	0.0250391	0.83686	-3.87804
PFKP	0.23349	0.0416194	2.30394	0.0251527	0.83686	-3.8795
PROP1	0.262691	0.0265952	2.3036	0.0251732	0.83686	-3.87976
SLC16A5	0.215892	0.0972138	2.3032	0.0251971	0.83686	-3.88006
SOCS5P5	0.294906	-0.00283407	2.30097	0.0253323	0.83686	-3.88178
ADAM19	0.283277	-0.0366212	2.2997	0.0254095	0.83686	-3.88275
GNA15	0.250513	0.0879555	2.29957	0.0254175	0.83686	-3.88285
SMUG1	0.277279	0.0248469	2.29923	0.025438	0.83686	-3.88311
NCBP3	0.326314	-0.00775412	2.29871	0.0254702	0.83686	-3.88351
RERGL	0.277457	-0.102201	2.2976	0.0255378	0.83686	-3.88436
PHBP2	0.372468	0.0237914	2.29692	0.0255795	0.83686	-3.88489
FAM210CP	0.251494	0.0450732	2.29619	0.0256239	0.83686	-3.88544
GXYLT1P1	0.264719	-0.0523034	2.29556	0.0256625	0.83686	-3.88592
CENPA	0.244778	0.00185144	2.29459	0.0257225	0.83686	-3.88667
CXorf65	0.248845	0.0216416	2.29453	0.0257259	0.83686	-3.88671
PCYT2	0.293367	-0.0235997	2.29447	0.0257296	0.83686	-3.88676
CFAP52	0.267071	-0.0258493	2.29409	0.0257533	0.83686	-3.88706
UCHL1-AS1	0.236222	-0.0441807	2.29239	0.0258578	0.83686	-3.88835
HSPB6	0.270838	0.0100069	2.29172	0.0258993	0.83686	-3.88887
TNFAIP2	0.22382	-0.0541047	2.29161	0.0259064	0.83686	-3.88895
OTOG	0.268031	-0.00842044	2.29114	0.0259354	0.83686	-3.88931
GALNTL6	0.248483	-0.00738187	2.29093	0.0259488	0.83686	-3.88948
USP17L15	0.328498	0.0472287	2.29082	0.0259553	0.83686	-3.88956
BFSP1	0.218945	0.0687823	2.29036	0.0259838	0.83686	-3.88991
CBARP	0.245623	-0.0128654	2.29011	0.0259993	0.83686	-3.8901
RAB4B	0.210174	-0.0176005	2.28922	0.0260547	0.83686	-3.89078
HAO2	0.305142	0.0533165	2.28659	0.0262187	0.83686	-3.89279
HTR1E	0.248051	-0.00780739	2.28504	0.026316	0.83686	-3.89398
IFNL1	0.20511	-0.00983863	2.28382	0.0263925	0.83686	-3.89491
ISCA2P1	0.258424	0.0268296	2.28144	0.0265428	0.83686	-3.89672
SUMO1P1	0.274142	0.051186	2.27989	0.026641	0.83686	-3.89791
IGHV3-79	0.282707	-0.0257427	2.27942	0.0266713	0.83686	-3.89827
ITPR1	0.353005	0.02915	2.27922	0.0266836	0.83686	-3.89842
PRR19	0.308948	0.0174271	2.27898	0.0266991	0.83686	-3.8986
TTC33	0.276496	-0.00396236	2.27854	0.0267273	0.83686	-3.89894
PIGBOS1	0.246559	0.0013505	2.27608	0.0268839	0.83686	-3.90081
OR2AL1P	0.214451	-0.0308768	2.2752	0.0269403	0.83686	-3.90148
HIF3A	0.305019	0.00671745	2.27269	0.0271016	0.83686	-3.90339
CYP26C1	0.246098	-0.0352414	2.27185	0.0271557	0.83686	-3.90403
MUC16	0.347715	0.0249557	2.27121	0.0271971	0.83686	-3.90452
SDC1	0.466722	0.0484271	2.26882	0.0273524	0.83686	-3.90634
PC	0.322656	0.0268521	2.26803	0.0274037	0.83686	-3.90694
HMGN1P12	0.264844	-0.0414505	2.26706	0.027467	0.83686	-3.90768
LIG1	0.299359	0.09423	2.26666	0.0274932	0.83686	-3.90798
APOL4	0.265456	0.0203879	2.26663	0.027495	0.83686	-3.908
ALG10B	0.21585	0.0239503	2.26568	0.0275569	0.83686	-3.90872
NFIA-AS2	0.309221	-0.0608607	2.26501	0.0276008	0.83686	-3.90923
EFCC1	0.26559	0.0015478	2.2646	0.027628	0.83686	-3.90955
PCAT5	0.295302	-0.0380739	2.26309	0.0277266	0.83686	-3.91069
MACC1-AS1	0.264786	-0.0576024	2.26287	0.0277413	0.83686	-3.91086
CNTD1	0.325662	-0.0257589	2.26287	0.0277417	0.83686	-3.91086
SOD3	0.271556	0.0166542	2.26252	0.0277642	0.83686	-3.91112
TRAV2	0.21115	-0.000184407	2.26235	0.0277758	0.83686	-3.91125
CYBA	0.286506	0.0551763	2.26003	0.0279287	0.83686	-3.91301
KRT31	0.285067	-0.000896173	2.25682	0.0281422	0.83686	-3.91545
MTND4P11	0.350047	0.0478735	2.25582	0.0282089	0.83686	-3.9162
CLEC18A	0.225518	0.00904268	2.25553	0.0282281	0.83686	-3.91642
SNAR-G1	0.278319	0.0777536	2.25536	0.0282396	0.83686	-3.91655
OR4A6P	0.236838	-0.0109259	2.25492	0.0282689	0.83686	-3.91688
PCCA	0.302168	0.0722404	2.25391	0.0283365	0.83686	-3.91765
SOX17	0.194515	0.00438633	2.25369	0.0283511	0.83686	-3.91781
B4GALNT1	0.233318	0.0542648	2.25233	0.0284428	0.83686	-3.91884
TSPY5P	0.306898	-0.0186953	2.25231	0.0284443	0.83686	-3.91886
NDRG4	0.279961	0.0154474	2.25226	0.0284472	0.83686	-3.91889
TP53I3	0.224482	-0.0228716	2.25226	0.0284473	0.83686	-3.91889
WIZ	0.214701	0.0641614	2.25143	0.0285035	0.83686	-3.91952
SLC35F1	0.231306	0.00649474	2.24866	0.0286908	0.83686	-3.92162
ZNF890P	0.276385	-0.0401467	2.24811	0.0287283	0.83686	-3.92204
PSMA6P4	0.238297	0.0122384	2.24779	0.0287497	0.83686	-3.92227
BMS1P19	0.2441	-0.0164853	2.24708	0.0287979	0.83686	-3.92281
BAGE	0.224881	-0.00393762	2.2445	0.0289741	0.83686	-3.92476
ZNF551	0.280626	-0.019605	2.24388	0.0290166	0.83686	-3.92523
VN1R6P	0.292781	0.0778396	2.24257	0.0291061	0.83686	-3.92621
TATDN2P2	0.270741	0.0515795	2.24124	0.0291977	0.83686	-3.92721
CRYAA	0.293956	0.024305	2.24103	0.0292118	0.83686	-3.92737
RHCG	0.315043	0.0236906	2.24095	0.0292174	0.83686	-3.92743
MAN1B1	0.251848	0.0108739	2.2409	0.0292212	0.83686	-3.92747
NCBP1	0.241966	0.0497167	2.24066	0.0292376	0.83686	-3.92765
BLACAT1	0.277759	0.032917	2.23946	0.0293207	0.83686	-3.92856
RPL23AP90	0.245593	-0.00771934	2.23691	0.0294968	0.83686	-3.93047
TUBBP11	0.297758	0.0384157	2.23591	0.0295665	0.83686	-3.93123
TMEM200B	0.280629	0.0229785	2.23559	0.0295889	0.83686	-3.93147
LPA	0.318295	0.0636462	2.235	0.0296302	0.83686	-3.93191
AKR1B15	0.173898	-0.0324818	2.23373	0.0297186	0.83686	-3.93286
CRISP2	0.23105	-0.0249906	2.2333	0.0297486	0.83686	-3.93319
MAPK12	0.233104	0.00215174	2.23245	0.0298084	0.83686	-3.93383
SH3GL1P1	0.257884	0.0337037	2.232	0.0298402	0.83686	-3.93417
HK3	0.238142	-0.0205711	2.23117	0.0298983	0.83686	-3.93479
LRRC6P1	0.249225	-0.0106505	2.23108	0.0299045	0.83686	-3.93486
RPL3P8	0.217073	-0.0382621	2.23097	0.0299125	0.83686	-3.93494
C11orf96	0.263281	0.0431647	2.22879	0.030066	0.83686	-3.93658
CTAG2	0.190528	-0.0282417	2.22844	0.0300907	0.83686	-3.93684
TRPM4	0.253726	-0.0272289	2.22776	0.0301391	0.83686	-3.93735
RPL32P35	0.280475	0.0344057	2.2277	0.0301433	0.83686	-3.9374
TMEM246-AS1	0.206325	-0.00998476	2.22764	0.0301474	0.83686	-3.93744
SCN3B	0.306358	0.00449634	2.22592	0.0302699	0.83686	-3.93873
KRT8P7	0.280393	0.00312908	2.22504	0.030332	0.83686	-3.93939
RPL23AP54	0.343931	-0.0110131	2.22489	0.0303432	0.83686	-3.93951
NRBF2P5	0.375906	0.0297919	2.22193	0.0305542	0.83686	-3.94172
TSSK4	0.236816	-0.014966	2.2219	0.0305563	0.83686	-3.94174
ATP12A	0.28833	-0.0482889	2.22175	0.0305671	0.83686	-3.94185
FGF22	0.278272	0.0485188	2.22145	0.030589	0.83686	-3.94208
NDUFS6P1	0.296649	-0.0557891	2.22121	0.030606	0.83686	-3.94226
SSXP5	0.313384	0.0124785	2.22058	0.0306513	0.83686	-3.94273
ERCC2	0.324826	0.0761557	2.21871	0.0307861	0.83686	-3.94413
ST3GAL5-AS1	0.262285	-0.0044117	2.21795	0.0308409	0.83686	-3.9447
GAGE1	0.247815	-0.0839908	2.21785	0.0308482	0.83686	-3.94478
HMGN1P19	0.23704	0.00906179	2.21764	0.0308633	0.83686	-3.94493
FECHP1	0.216771	0.0727212	2.21713	0.0308999	0.83686	-3.94531
CHEK2P4	0.21866	0.0155778	2.2171	0.030902	0.83686	-3.94533
KAT2A	0.30502	0.0701874	2.21486	0.031065	0.83686	-3.94701
HSPA8P19	0.202111	-0.0305997	2.21472	0.0310752	0.83686	-3.94712
DPH1	0.245497	-0.018574	2.21464	0.0310806	0.83686	-3.94717
ADAMTS7	0.345505	0.0261102	2.21425	0.0311095	0.83686	-3.94747
HSPC324	0.25504	-0.0488422	2.21327	0.031181	0.83686	-3.9482
DMPK	0.234974	0.00119314	2.21227	0.0312536	0.83686	-3.94894
GLP2R	0.282808	-0.0239235	2.21169	0.0312965	0.83686	-3.94938
RPL30P12	0.262184	-0.00952085	2.21066	0.0313717	0.83686	-3.95015
CTNNA2	0.358302	-0.0751039	2.21063	0.0313738	0.83686	-3.95017
PPIAP17	0.317762	-0.0297836	2.20968	0.0314433	0.83686	-3.95087
CD8A	0.282154	0.0722418	2.20789	0.0315755	0.83686	-3.95221
RAB17	0.217524	0.0480259	2.20666	0.0316663	0.83686	-3.95313
ZC3H12C	0.295382	-0.00969797	2.20579	0.0317306	0.83686	-3.95377
SNAR-B2	0.478788	0.218883	2.20526	0.0317699	0.83686	-3.95417
RMDN3	0.180801	0.00296793	2.20398	0.0318655	0.83686	-3.95513
TEF	0.381963	0.0237812	2.2036	0.0318935	0.83686	-3.95541
NLRP1	0.226601	-0.0637015	2.20337	0.0319105	0.83686	-3.95558
SYT14	0.233462	-0.0242837	2.20294	0.0319427	0.83686	-3.9559
JARID2	0.264283	0.055482	2.20154	0.0320473	0.83686	-3.95694
CCDC124	0.230633	-0.00440346	2.20144	0.0320546	0.83686	-3.95701
PSMA2P2	0.175388	0.00645056	2.1987	0.0322598	0.83686	-3.95905
EPHB1	0.326017	0.0827674	2.19838	0.0322841	0.83686	-3.95929
OR5F2P	0.261173	0.0192942	2.19801	0.0323117	0.83686	-3.95956
MTCO1P4	0.266849	-0.0134665	2.19783	0.0323257	0.83686	-3.9597
HRAS	0.239177	0.0423743	2.19671	0.0324102	0.83686	-3.96053
GPR79	0.23054	0.0205235	2.19629	0.0324418	0.83686	-3.96084
TRPM2-AS	0.275541	0.0202271	2.19628	0.0324423	0.83686	-3.96085
TTTY12	0.255968	0.00124154	2.19624	0.0324455	0.83686	-3.96088
IGHVII-44-2	0.314122	0.00272989	2.19591	0.0324705	0.83686	-3.96112
FLJ36000	0.225599	-0.0275745	2.19543	0.0325066	0.83686	-3.96148
FERD3L	0.205244	0.0119309	2.19528	0.0325184	0.83686	-3.96159
TUSC7	0.310567	-0.0355216	2.19463	0.0325671	0.83686	-3.96207
KCNN2	0.332861	0.0214624	2.19408	0.0326089	0.83686	-3.96248
CFAP157	0.255125	0.0351416	2.19385	0.0326265	0.83686	-3.96265
PTPMT1	0.390312	0.185865	2.19252	0.0327279	0.83686	-3.96364
VN1R91P	0.290155	0.0446005	2.19178	0.032784	0.83686	-3.96419
CARF	0.205433	0.02033	2.19143	0.0328107	0.83686	-3.96445
CPLX3	0.213676	-0.0465595	2.18976	0.0329386	0.83686	-3.96569
LIN28A	0.252297	0.0235779	2.1888	0.0330125	0.83686	-3.9664
KCNU1	0.230141	-0.0203547	2.18876	0.0330151	0.83686	-3.96643
C10orf82	0.307715	-0.047085	2.18869	0.0330209	0.83686	-3.96648
ANKRD45	0.346154	0.0473443	2.18745	0.0331159	0.83686	-3.9674
CAPN3	0.330038	-0.0878754	2.18676	0.0331688	0.83686	-3.96791
C11orf87	0.272002	-0.00257828	2.18552	0.0332646	0.83686	-3.96882
MDGA1	0.239743	0.0312395	2.18507	0.0332997	0.83686	-3.96916
OR5G1P	0.279124	0.0531403	2.18456	0.0333393	0.83686	-3.96954
DDIAS	0.228186	-0.0255559	2.18403	0.0333802	0.83686	-3.96993
E2F2	0.304184	0.0591322	2.1822	0.0335221	0.83686	-3.97128
HGS	0.358441	0.100791	2.18167	0.0335632	0.83686	-3.97167
VPS9D1	0.281709	0.0157077	2.18109	0.0336084	0.83686	-3.9721
GAPDHP21	0.230297	-0.0452252	2.1795	0.0337329	0.83686	-3.97328
GAPDHP55	0.220497	0.00932654	2.17913	0.0337615	0.83686	-3.97355
NRG1	0.293285	0.012569	2.17751	0.0338883	0.83686	-3.97474
PIGCP2	0.236857	-0.0031624	2.17673	0.0339497	0.83686	-3.97532
SH3PXD2A	0.300698	-0.0674299	2.17643	0.0339733	0.83686	-3.97554
MGAT4EP	0.260247	-0.0436561	2.17589	0.0340158	0.83686	-3.97594
DCP1B	0.296407	0.0340901	2.17582	0.0340215	0.83686	-3.97599
UXS1	0.286072	-0.0222564	2.17552	0.0340456	0.83686	-3.97622
RBP2	0.326395	0.0399319	2.17467	0.0341122	0.83686	-3.97684
COL4A4	0.246452	-0.00682993	2.17455	0.0341219	0.83686	-3.97693
C1orf94	0.24969	0.0838122	2.17439	0.0341348	0.83686	-3.97705
MGAT2P1	0.29945	0.0161796	2.17399	0.0341661	0.83686	-3.97734
CETN1	0.306527	0.0547393	2.1736	0.0341966	0.83686	-3.97763
CATSPERD	0.243394	-0.0182415	2.17355	0.0342008	0.83686	-3.97766
DNALI1	0.195192	-0.000287306	2.17073	0.0344244	0.83686	-3.97974
ZNF608	0.364155	0.0220822	2.17059	0.0344363	0.83686	-3.97985
FSCB	0.226625	-0.0158654	2.16938	0.0345323	0.83686	-3.98074
TRIM26	0.208354	0.0115207	2.1687	0.034587	0.83686	-3.98124
PCAT1	0.23127	-0.046444	2.16842	0.0346093	0.83686	-3.98145
KIF26A	0.263305	0.0227721	2.16751	0.034682	0.83686	-3.98211
ANKRD55	0.24082	0.0156715	2.16666	0.0347498	0.83686	-3.98273
PLET1	0.239414	-0.0163014	2.16555	0.0348396	0.83686	-3.98356
TTTY4	0.303482	-0.0112215	2.16321	0.0350281	0.83686	-3.98527
TIMP4	0.256227	0.0174483	2.16208	0.0351194	0.83686	-3.9861
TLX1	0.354141	0.106419	2.16194	0.0351311	0.83686	-3.98621
DPH5	0.299979	-0.0517532	2.16162	0.0351569	0.83686	-3.98644
COX4I1P1	0.278594	0.0129959	2.16122	0.0351889	0.83686	-3.98673
RPL36P18	0.212579	0.0529543	2.16073	0.035229	0.83686	-3.98709
TOP3B	0.289421	0.0294213	2.16013	0.0352782	0.83686	-3.98754
OR5D3P	0.282163	0.00869829	2.15993	0.0352942	0.83686	-3.98768
MICF	0.29353	0.0519126	2.15845	0.0354146	0.83686	-3.98876
REXO1L2P	0.324404	0.064329	2.15768	0.035478	0.83686	-3.98933
ZNF444P1	0.229679	0.0250257	2.15675	0.035554	0.83686	-3.99001
MRPL57P8	0.30383	-0.0181834	2.15631	0.0355895	0.83686	-3.99033
GPR171	0.304622	-0.0754228	2.1558	0.0356315	0.83686	-3.99071
NANOGP11	0.26225	-0.0519902	2.15571	0.0356389	0.83686	-3.99077
RPL12P9	0.287414	0.0412649	2.15563	0.0356457	0.83686	-3.99083
TAS2R16	0.281859	0.0786753	2.15349	0.0358213	0.83686	-3.9924
GTF2E1	0.24959	0.0973434	2.1529	0.03587	0.83686	-3.99283
TUBB4BP5	0.269029	0.010737	2.15273	0.0358841	0.83686	-3.99295
POU5F1P4	0.260941	0.0427718	2.15251	0.0359027	0.83686	-3.99312
THRIL	0.301359	0.0318119	2.15113	0.036017	0.83686	-3.99413
CLIP1-AS1	0.287926	-0.0118748	2.15109	0.0360204	0.83686	-3.99416
UQCRBP1	0.199365	-0.0136134	2.15064	0.0360572	0.83686	-3.99448
PPIAP10	0.246068	0.0234136	2.15052	0.0360675	0.83686	-3.99457
IFNWP2	0.213056	0.0263923	2.1504	0.0360771	0.83686	-3.99466
TBX21	0.246497	0.0522225	2.1503	0.0360852	0.83686	-3.99473
RASGRP2	0.200884	0.0537883	2.14961	0.0361429	0.83686	-3.99524
HPN	0.214423	0.00120648	2.14939	0.0361608	0.83686	-3.9954
TBC1D10C	0.243714	-0.00638498	2.14861	0.0362256	0.83686	-3.99597
NOD2	0.190375	0.0446261	2.14836	0.036247	0.83686	-3.99615
RPL31P50	0.315351	0.0993242	2.14617	0.03643	0.83686	-3.99775
UBL5P3	0.272168	0.105374	2.14606	0.0364392	0.83686	-3.99783
XKRYP4	0.273649	-0.0374034	2.14547	0.0364882	0.83686	-3.99826
ZNF485	0.159069	-0.0178817	2.14527	0.036505	0.83686	-3.99841
RSAD1	0.237533	-0.0493602	2.14482	0.0365428	0.83686	-3.99874
CBX4	0.217731	0.00262175	2.14475	0.036549	0.83686	-3.99879
ZNF292	0.19225	0.0543722	2.14115	0.0368514	0.83686	-4.00141
NUTM2F	0.274223	0.0834779	2.14097	0.0368667	0.83686	-4.00154
INSM2	0.285693	0.0310122	2.14065	0.036894	0.83686	-4.00178
SNORD91B	0.367366	0.106585	2.13877	0.0370535	0.83686	-4.00315
SDAD1P2	0.230204	0.0364991	2.13716	0.0371903	0.83686	-4.00432
RPS23P10	0.245177	0.0137396	2.13542	0.0373385	0.83686	-4.00558
CCT8L2	0.20751	-0.0202476	2.13505	0.0373706	0.83686	-4.00586
YWHAQP9	0.208994	-0.0005933	2.13463	0.0374064	0.83686	-4.00616
MRPL12	0.214713	0.0530635	2.13375	0.0374819	0.83686	-4.0068
DUSP12P1	0.205704	-0.0170626	2.13306	0.0375409	0.83686	-4.0073
PACSIN1	0.243396	0.00342426	2.13246	0.0375924	0.83686	-4.00773
ARAP3	0.261827	0.00252539	2.13183	0.0376474	0.83686	-4.0082
EHBP1L1	0.212773	0.0282852	2.1313	0.0376923	0.83686	-4.00858
MTND2P8	0.204131	-0.0295901	2.13081	0.0377348	0.83686	-4.00894
PICK1	0.22209	-0.0202911	2.1308	0.0377356	0.83686	-4.00894
RPL7P51	0.231197	-0.00176495	2.13063	0.0377502	0.83686	-4.00906
IGHVIII-67-3	0.281478	-0.000729032	2.13058	0.0377551	0.83686	-4.00911
COX6A1P3	0.29803	0.0353971	2.13008	0.037798	0.83686	-4.00947
ZNF600	0.283832	0.0952116	2.12975	0.0378262	0.83686	-4.0097
REXO1L1P	0.342364	0.0273179	2.12811	0.0379684	0.83686	-4.0109
HSFX1	0.258127	-0.0275021	2.12792	0.0379848	0.83686	-4.01103
MTND2P11	0.292958	-0.0260402	2.12725	0.0380428	0.83686	-4.01152
IFITM5	0.229034	0.0465868	2.12684	0.0380789	0.83686	-4.01182
MIPEPP2	0.280464	0.0225805	2.12655	0.0381042	0.83686	-4.01203
ZCCHC3	0.260158	0.0273963	2.12631	0.0381247	0.83686	-4.0122
DDX6P2	0.243191	-0.0109593	2.12606	0.0381464	0.83686	-4.01238
NCBP2L	0.20444	-0.0267981	2.12449	0.038284	0.83686	-4.01352
CCDC62	0.312532	-0.000952656	2.12351	0.0383693	0.83686	-4.01423
PPP1R9A	0.275	-0.00214701	2.1235	0.0383706	0.83686	-4.01424
RPUSD1	0.20187	0.0222266	2.12339	0.0383804	0.83686	-4.01432
KDM4D	0.229964	0.0152777	2.12232	0.0384737	0.83686	-4.01509
SYPL2	0.256816	0.0392638	2.12205	0.0384976	0.83686	-4.01529
C14orf39	0.218825	-0.0316616	2.12166	0.0385322	0.83686	-4.01557
CLEC12A	0.256746	0.0131692	2.12046	0.0386371	0.83686	-4.01644
SLC5A5	0.306969	-0.00676733	2.11896	0.0387699	0.83686	-4.01753
PTPRVP	0.233157	-0.0138881	2.11884	0.0387799	0.83686	-4.01761
ISM1-AS1	0.336714	0.0580741	2.11875	0.0387887	0.83686	-4.01768
SLA	0.265983	0.00711299	2.1185	0.0388107	0.83686	-4.01786
ZNF576	0.206272	-0.00235369	2.11805	0.0388497	0.83686	-4.01818
GRIA1	0.271055	-0.020982	2.11758	0.0388915	0.83686	-4.01852
VN1R31P	0.249219	0.0214622	2.11752	0.0388971	0.83686	-4.01857
FRRS1L	0.299402	0.0597982	2.11714	0.0389312	0.83686	-4.01884
SYT1	0.331901	0.0615292	2.11709	0.038935	0.83686	-4.01887
SPINK6	0.232205	0.012875	2.11674	0.0389661	0.83686	-4.01913
CABP4	0.232373	0.0355359	2.11659	0.0389793	0.83686	-4.01924
AIRE	0.215021	0.00202075	2.11659	0.0389798	0.83686	-4.01924
PTCHD4	0.25832	-0.00873618	2.11611	0.0390222	0.83686	-4.01958
RPS7P15	0.311925	0.173789	2.11583	0.0390473	0.83686	-4.01979
HOXC-AS2	0.258696	0.0594114	2.1154	0.039085	0.83686	-4.02009
KIT	0.271996	-0.0519336	2.11506	0.0391153	0.83686	-4.02034
TPM4	0.225351	-0.0363222	2.11378	0.0392296	0.83686	-4.02127
SLC18A3	0.24453	-0.0252186	2.11359	0.0392466	0.83686	-4.0214
LRRC46	0.217685	-0.0472065	2.11309	0.0392915	0.83686	-4.02177
GOLGA6L3	0.231384	-0.0371651	2.11235	0.0393579	0.83686	-4.0223
SLC35F3	0.28942	-0.00887067	2.11213	0.0393769	0.83686	-4.02246
LHB	0.179025	-0.0477673	2.11166	0.0394197	0.83686	-4.0228
CDKN1C	0.263594	0.0454649	2.11131	0.0394504	0.83686	-4.02305
OR51B2	0.201011	-0.0712342	2.11033	0.0395392	0.83686	-4.02376
TIMM10B	0.261766	0.0947648	2.10972	0.0395939	0.83686	-4.0242
RPL10L	0.303828	-0.137465	2.10927	0.0396339	0.83686	-4.02452
APOOP2	0.241798	-0.0112718	2.10904	0.0396547	0.83686	-4.02469
SPDYE2B	0.258788	0.0406488	2.10707	0.039833	0.83686	-4.02611
SPDYE2	0.258788	0.0406488	2.10707	0.039833	0.83686	-4.02611
CYP4F10P	0.288499	0.0949071	2.10687	0.0398508	0.83686	-4.02625
LCN1P1	0.281826	0.0318014	2.10668	0.0398677	0.83686	-4.02638
CLEC18C	0.198041	-0.00270109	2.10391	0.0401193	0.83686	-4.02838
ATOH7	0.240764	0.0197891	2.10327	0.0401782	0.83686	-4.02884
ANKS3	0.243674	0.00321279	2.10305	0.0401979	0.83686	-4.029
FIZ1	0.250051	0.0743948	2.10263	0.0402358	0.83686	-4.0293
GRK6	0.236164	0.0516171	2.10182	0.0403102	0.83686	-4.02988
WNT4	0.239984	0.0121656	2.10068	0.0404148	0.83686	-4.03071
SLC16A12	0.27268	0.0133162	2.10022	0.0404571	0.83686	-4.03104
ATG13	0.295313	0.0167	2.10001	0.040476	0.83686	-4.03118
NEFHP1	0.241858	0.0213712	2.09898	0.0405703	0.83686	-4.03192
CHRM3-AS1	0.264394	0.0786727	2.09888	0.0405798	0.83686	-4.032
RFNG	0.327443	-0.0125697	2.09676	0.0407746	0.83686	-4.03351
SGCA	0.245088	0.0108436	2.09663	0.0407873	0.83686	-4.03361
COL23A1	0.163276	0.0389422	2.09663	0.0407875	0.83686	-4.03361
HPN-AS1	0.177011	0.023423	2.09643	0.0408058	0.83686	-4.03376
PHEX	0.244705	0.018073	2.09591	0.0408534	0.83686	-4.03413
DENND1C	0.287334	0.0265766	2.09445	0.0409887	0.83686	-4.03517
C17orf100	0.256582	-0.00599899	2.09443	0.040991	0.83686	-4.03519
GS1-279B7.1	0.208191	-0.0497909	2.09371	0.0410577	0.83686	-4.03571
NARF-IT1	0.216232	-0.0293973	2.09208	0.0412092	0.83686	-4.03687
RARRES2P7	0.226526	0.0423792	2.0918	0.0412351	0.83686	-4.03707
PCOLCE-AS1	0.23723	0.0456626	2.09168	0.0412462	0.83686	-4.03716
IGDCC4	0.229681	0.0434185	2.09092	0.0413175	0.83686	-4.0377
NOTCH1	0.279827	-0.0236114	2.09086	0.0413228	0.83686	-4.03775
HTRA3	0.243631	-0.0167053	2.09028	0.0413776	0.83686	-4.03817
TDRD1	0.290387	0.0260123	2.08974	0.0414274	0.83686	-4.03855
BMP6P1	0.233361	-0.0264005	2.08931	0.0414683	0.83686	-4.03886
RPL36P2	0.202722	-0.0169738	2.08901	0.0414963	0.83686	-4.03907
LRRC45	0.304381	0.000351202	2.08828	0.0415647	0.83686	-4.03959
BMP7-AS1	0.239786	0.0438183	2.08754	0.0416338	0.83686	-4.04012
SRXN1	0.256306	0.06433	2.08731	0.0416554	0.83686	-4.04029
CYP2B6	0.47757	0.248315	2.08712	0.0416737	0.83686	-4.04042
MTND4P17	0.229384	-0.0624894	2.08591	0.0417873	0.83686	-4.04129
IGBP1P1	0.237332	0.00704502	2.08556	0.0418208	0.83686	-4.04154
MAGI2	0.278443	0.0238689	2.08446	0.0419248	0.83686	-4.04233
RPAP1	0.226282	-0.02715	2.0833	0.0420348	0.83686	-4.04316
RPL3P10	0.341539	0.0485101	2.08234	0.0421251	0.83686	-4.04384
MCF2L	0.275867	0.0705618	2.08223	0.0421356	0.83686	-4.04391
WDR54	0.251721	0.0120781	2.08223	0.0421359	0.83686	-4.04392
OXCT1-AS1	0.217035	0.0230402	2.08001	0.0423479	0.83686	-4.04551
VPS33B	0.267964	0.0543147	2.07936	0.0424098	0.83686	-4.04597
P2RY4	0.202764	0.0102922	2.07871	0.0424713	0.83686	-4.04643
CNTNAP5	0.268526	0.0371196	2.07793	0.0425461	0.83686	-4.04698
SDF2L1	0.211271	-0.0488327	2.07763	0.0425749	0.83686	-4.0472
CDY1	0.234445	0.0039135	2.07705	0.042631	0.83686	-4.04761
FAM178B	0.271447	-0.0316247	2.07437	0.0428886	0.83686	-4.04952
PABPC1L2B	0.273315	0.0613388	2.0737	0.0429529	0.83686	-4.04999
HMGN2P39	0.231656	-0.00426598	2.07265	0.0430547	0.83686	-4.05074
TNNT1	0.173016	-0.0551445	2.07242	0.0430775	0.83686	-4.05091
RPS6KB2	0.236309	0.0636253	2.07194	0.0431235	0.83686	-4.05125
ATAD2B	0.295673	0.0273423	2.07188	0.0431297	0.83686	-4.05129
PDK2	0.305092	0.0754234	2.07187	0.0431306	0.83686	-4.0513
TAS2R14	0.339335	-0.016847	2.0716	0.043157	0.83686	-4.05149
B9D2	0.192286	0.0387192	2.07084	0.0432305	0.83686	-4.05203
EVA1C	0.307945	0.0231329	2.07049	0.0432641	0.83686	-4.05228
DUX4L26	0.293131	0.0324836	2.07035	0.0432777	0.83686	-4.05238
RHBDF2	0.209509	0.0451014	2.07032	0.0432809	0.83686	-4.0524
BPY2C	0.235418	-0.0245703	2.06982	0.0433299	0.83686	-4.05276
OR8X1P	0.240061	-0.032935	2.06917	0.0433926	0.83686	-4.05322
MTND3P5	0.282597	0.0553348	2.06884	0.0434248	0.83686	-4.05345
SNORD114-12	0.270759	-0.193171	2.06869	0.0434399	0.83686	-4.05356
THSD1	0.274971	-0.0282525	2.06769	0.0435371	0.83686	-4.05427
KCCAT198	0.241858	-0.0502242	2.06706	0.0435985	0.83686	-4.05471
NOP56P2	0.214104	0.0279832	2.06632	0.0436717	0.83686	-4.05524
ICOS	0.291592	0.0476054	2.0663	0.0436732	0.83686	-4.05525
ZNF252P-AS1	0.209571	0.0310223	2.06596	0.0437067	0.83686	-4.0555
KRT12	0.27952	-0.0223189	2.06595	0.0437074	0.83686	-4.0555
KRTAP19-7	0.211575	-0.000560996	2.06463	0.0438377	0.83686	-4.05644
MRPS36P2	0.370517	0.0800951	2.06431	0.0438687	0.83686	-4.05667
RPL23AP96	0.253151	-0.0305116	2.06209	0.044088	0.83686	-4.05824
CHST10	0.308703	-0.00924438	2.06051	0.0442442	0.83686	-4.05936
WDR97	0.240786	0.0717761	2.06037	0.0442576	0.83686	-4.05946
DCD	0.257968	-0.0142154	2.06013	0.044282	0.83686	-4.05963
KCNK9	0.217398	0.0628211	2.05903	0.0443912	0.83686	-4.06041
CLCA3P	0.231047	-0.0143592	2.05897	0.0443972	0.83686	-4.06045
DIO2	0.235542	0.0224566	2.05836	0.0444577	0.83686	-4.06088
NR2E3	0.220878	0.0655661	2.05692	0.0446009	0.83686	-4.0619
GHDC	0.224907	0.0215393	2.05681	0.0446122	0.83686	-4.06198
OR10V2P	0.194183	0.0662302	2.05674	0.0446196	0.83686	-4.06203
ECM1P2	0.26492	0.0309029	2.05662	0.044631	0.83686	-4.06211
IARS2P1	0.22008	-0.0167438	2.05445	0.044848	0.83686	-4.06365
SIGLEC12	0.254802	-0.0103643	2.05263	0.0450313	0.83686	-4.06493
SLC25A18	0.18296	0.00423775	2.05233	0.0450618	0.83686	-4.06515
CLDN25	0.257845	-0.040292	2.04955	0.045342	0.83686	-4.06711
PPP1R26P5	0.255001	-0.00117742	2.04921	0.0453764	0.83686	-4.06735
SRPK3	0.243815	0.0547436	2.04907	0.0453907	0.83686	-4.06744
PRR3	0.267018	0.0141711	2.04899	0.0453989	0.83686	-4.0675
SMIM13	0.288736	0.0528943	2.04843	0.0454561	0.83686	-4.0679
ANKRD29	0.411088	0.0429401	2.04824	0.0454752	0.83686	-4.06803
MLLT10P1	0.264525	0.0113345	2.04818	0.0454813	0.83686	-4.06807
DCLRE1CP1	0.214448	0.00484906	2.04766	0.0455336	0.83686	-4.06844
ASAH2	0.274139	0.0617159	2.04741	0.0455595	0.83686	-4.06862
HOXA11	0.258005	0.0144234	2.04666	0.0456359	0.83686	-4.06915
LENG8-AS1	0.228987	0.0131289	2.04573	0.0457307	0.83686	-4.0698
GABRG1	0.235455	-0.0289378	2.04555	0.045749	0.83686	-4.06993
SH2D3A	0.282475	0.0602239	2.04513	0.0457918	0.83686	-4.07022
GRM4	0.244969	0.0561002	2.04423	0.0458833	0.83686	-4.07085
ZBTB18	0.256051	0.0412281	2.04407	0.0458997	0.83686	-4.07097
GOLGA8T	0.239388	-0.0374191	2.04335	0.0459741	0.83686	-4.07148
CTRL	0.321002	0.0264635	2.04187	0.0461257	0.83686	-4.07252
FAM126A	0.274014	0.0192647	2.04116	0.046199	0.83686	-4.07302
LCA5L	0.267696	0.0253376	2.03944	0.0463758	0.83686	-4.07422
PNPLA3	0.386075	-0.0549273	2.03872	0.0464506	0.83686	-4.07473
MGAT5B	0.262045	0.0261793	2.03847	0.0464758	0.83686	-4.0749
ELL	0.182359	-0.0612763	2.03843	0.0464801	0.83686	-4.07493
RAB42	0.25496	-0.0126067	2.03701	0.0466275	0.83686	-4.07593
RUSC1	0.218249	0.0710828	2.03685	0.046644	0.83686	-4.07604
ASB6	0.200049	-0.00520636	2.03551	0.0467836	0.83686	-4.07699
POM121L3P	0.253905	0.0191335	2.03442	0.0468969	0.83686	-4.07775
CNN2P4	0.203902	-0.00320683	2.03394	0.0469473	0.83686	-4.07809
IRX4	0.263453	0.0435256	2.03342	0.0470008	0.83686	-4.07845
MEP1A	0.537819	-0.14703	2.03189	0.0471611	0.83686	-4.07952
RPL7P30	0.272834	0.0353585	2.03184	0.0471665	0.83686	-4.07956
CD300C	0.287163	-0.0240036	2.0315	0.0472017	0.83686	-4.07979
CD101	0.194166	0.000892348	2.03064	0.0472928	0.83686	-4.0804
MAMDC2-AS1	0.24594	-0.0252663	2.02898	0.0474667	0.83686	-4.08156
TRHR	0.215844	-0.00843927	2.02837	0.0475315	0.83686	-4.08199
C1orf195	0.272793	0.0800556	2.02713	0.0476618	0.83686	-4.08285
PRAMEF25	0.235858	-0.0593862	2.02645	0.0477343	0.83686	-4.08333
KRT40	0.201514	0.027234	2.02555	0.0478297	0.83686	-4.08396
BEX1	0.257668	-0.0491102	2.02519	0.0478676	0.83686	-4.08421
POM121L4P	0.226908	-0.00645625	2.02461	0.047929	0.83686	-4.08461
LRRC37A9P	0.264505	0.0816324	2.02458	0.0479328	0.83686	-4.08464
TIMM17BP1	0.216302	-0.0410179	2.02438	0.0479537	0.83686	-4.08478
VPS72	0.241276	-0.0175981	2.02388	0.0480071	0.83686	-4.08513
OR2AM1P	0.245702	0.0146945	2.02378	0.0480171	0.83686	-4.08519
MTCO2P8	0.282359	-0.023159	2.02366	0.0480301	0.83686	-4.08528
OR8G1	0.261926	-0.0230751	2.0234	0.0480578	0.83686	-4.08546
ID1	0.327958	-0.0366156	2.02312	0.0480879	0.83686	-4.08566
GPX1P2	0.259823	0.0255201	2.02253	0.0481512	0.83686	-4.08607
OR7G1	0.28279	0.0552268	2.02105	0.0483091	0.83686	-4.0871
ZNF211	0.281056	0.031307	2.02099	0.048315	0.83686	-4.08714
ADAM3B	0.304367	-0.139852	2.02086	0.0483295	0.83686	-4.08724
SCNN1A	0.217945	-0.00423315	2.02071	0.048345	0.83686	-4.08734
ADAMTSL5	0.198017	0.0201049	2.02037	0.0483819	0.83686	-4.08758
WDR88	0.197346	0.0566256	2.02008	0.0484128	0.83686	-4.08778
IFNNP1	0.196035	0.00440407	2.0197	0.048453	0.83686	-4.08804
TRAPPC9	0.237983	-0.0408284	2.01967	0.0484561	0.83686	-4.08806
SPANXA2	0.222795	-0.0218915	2.01923	0.0485043	0.83686	-4.08837
WDR18	0.268602	0.0515742	2.01862	0.0485696	0.83686	-4.0888
TRABD2B	0.256094	0.00616766	2.01779	0.0486588	0.83686	-4.08938
HHATL	0.1976	0.00477625	2.01772	0.0486665	0.83686	-4.08943
GADL1	0.255707	0.110132	2.01722	0.0487204	0.83686	-4.08978
GAPDHP20	0.247089	0.0741412	2.01704	0.0487398	0.83686	-4.0899
MYF5	0.214326	-0.00344289	2.01691	0.0487529	0.83686	-4.08999
CXorf56	0.229142	0.0719277	2.01654	0.0487935	0.83686	-4.09025
ZNF687	0.221126	0.0286802	2.01594	0.0488578	0.83686	-4.09066
TRI-TAT2-3	0.185774	-0.0185976	2.01587	0.048866	0.83686	-4.09072
ZNF607	0.268929	0.03757	2.01579	0.0488744	0.83686	-4.09077
DUXAP11	0.204346	-0.0155949	2.01568	0.0488861	0.83686	-4.09085
KRT17	0.222924	-0.0393788	2.01557	0.0488983	0.83686	-4.09092
PTPRZ1	0.230743	-0.139551	2.01501	0.0489585	0.83686	-4.09131
FAM9B	0.200837	-0.00310284	2.01448	0.0490165	0.83686	-4.09168
GTF2IP22	0.33309	0.00872495	2.0143	0.0490358	0.83686	-4.09181
TTTY7B	0.254137	0.0396856	2.01422	0.0490436	0.83686	-4.09186
SCGB2B2	0.219985	0.00514834	2.01375	0.0490954	0.83686	-4.09219
CAMK1D	0.30583	0.0238221	2.01314	0.0491612	0.83686	-4.09261
GNAI2P2	0.285259	0.0292601	2.01302	0.0491745	0.83686	-4.0927
CCDC71	0.281991	0.0693317	2.01288	0.0491897	0.83686	-4.0928
CCDC188	0.188461	0.0373171	2.01282	0.0491964	0.83686	-4.09284
PRR15	0.217127	-0.00216239	2.01203	0.0492816	0.83686	-4.09338
KRT8P27	0.202215	0.0544017	2.011	0.0493946	0.83686	-4.0941
RPS26P4	0.263527	-0.0173171	2.0108	0.0494165	0.83686	-4.09424
FAM90A4P	0.223501	-0.0122656	2.0106	0.0494379	0.83686	-4.09438
FTLP12	0.26257	0.0311968	2.00976	0.049529	0.83686	-4.09496
POFUT2	0.200603	-0.0240104	2.00975	0.0495305	0.83686	-4.09497
ENHO	0.286102	0.0305697	2.00929	0.0495805	0.83686	-4.09529
REXO1L4P	0.273552	0.0353694	2.00896	0.0496168	0.83686	-4.09552
CBX3P2	0.304068	-0.0269382	2.00862	0.0496542	0.83686	-4.09576
UBE2FP3	0.220989	0.00950719	2.00856	0.0496604	0.83686	-4.09579
OR9G1	0.236774	-0.00164794	2.00856	0.0496608	0.83686	-4.0958
RABAC1	0.178775	-0.0132258	2.00762	0.0497637	0.83686	-4.09645
OR13C2	0.229616	0.00779316	2.00743	0.0497852	0.83686	-4.09658
TTYH3	0.26122	0.0745636	2.00721	0.0498086	0.83686	-4.09673
ZNF649-AS1	0.229369	0.0204141	2.00646	0.0498919	0.83686	-4.09726
RPL29P19	0.250884	-0.00997014	2.00624	0.0499151	0.83686	-4.09741
FOXC2	0.28708	0.022815	2.00599	0.0499429	0.83686	-4.09758
PDZD2	0.351401	-0.0880877	2.00584	0.0499595	0.83686	-4.09768
GOLGA8B	0.233285	-0.034353	2.00559	0.0499873	0.83686	-4.09786
DMRT1	0.274012	-0.0107569	2.00423	0.0501372	0.83686	-4.0988
LIMD1	0.333173	0.0525922	2.00357	0.0502099	0.83686	-4.09926
ZSCAN18	0.231411	0.0553381	2.00265	0.0503117	0.83686	-4.0999
SF3A3P1	0.202299	-0.0167182	2.00251	0.0503269	0.83686	-4.09999
GPR42	0.236549	0.0203155	2.00249	0.0503292	0.83686	-4.10001
SNAR-C2	0.452336	0.223825	2.00182	0.0504037	0.83686	-4.10047
SNAR-C5	0.452336	0.223825	2.00182	0.0504037	0.83686	-4.10047
FEM1A	0.253438	0.0291305	2.00182	0.0504037	0.83686	-4.10047
TP53	0.195981	0.0319485	2.00154	0.0504348	0.83686	-4.10067
SRMS	0.231006	0.0248727	2.00141	0.0504491	0.83686	-4.10075
TBC1D25	0.227502	0.0231304	2.00073	0.0505255	0.83686	-4.10123
DPPA2P2	0.231884	-0.0384529	1.99994	0.0506132	0.83686	-4.10178
TNFSF14	0.270635	-0.0237385	1.9997	0.0506391	0.83686	-4.10194
ZNF324B	0.278008	0.026474	1.99919	0.0506962	0.83686	-4.10229
CACNA1C-IT1	0.239801	-0.0487954	1.99908	0.0507083	0.83686	-4.10237
HES5	0.196497	0.00445644	1.99727	0.0509104	0.83686	-4.10362
ZBTB20-AS4	0.245353	-0.0137315	1.99703	0.0509382	0.83686	-4.10379
OR5D2P	0.251829	-0.0419929	1.99544	0.0511157	0.83686	-4.10488
GJC2	0.314705	0.0463248	1.99491	0.0511757	0.83686	-4.10525
CNNM1	0.248009	0.0726778	1.99434	0.0512395	0.83686	-4.10564
RPL39P31	0.252514	-0.00224552	1.99424	0.0512514	0.83686	-4.10572
TF	0.2078	-0.0451569	1.99423	0.0512527	0.83686	-4.10573
NID1	0.263522	-0.123088	1.99354	0.0513299	0.83686	-4.1062
ZNF524	0.259985	-0.00136961	1.99314	0.0513755	0.83686	-4.10648
LY6G6D	0.362313	0.136705	1.99305	0.0513852	0.83686	-4.10654
TEAD3	0.243963	-0.0428153	1.99247	0.0514504	0.83686	-4.10694
GUSBP12	0.193645	0.083353	1.99156	0.0515539	0.83686	-4.10757
TSPAN16	0.261353	-0.0236131	1.99112	0.051603	0.83686	-4.10787
NHLH2	0.235867	-0.0250088	1.9907	0.0516509	0.83686	-4.10816
RNF17	0.21469	-0.0427367	1.99019	0.051709	0.83686	-4.10851
MRPL4	0.201916	0.00831736	1.98971	0.0517628	0.83686	-4.10884
SRMP2	0.302398	0.10145	1.9894	0.0517983	0.83686	-4.10906
AMN	0.265174	0.00833379	1.98929	0.0518112	0.83686	-4.10913
DUXAP7	0.262444	-0.0310834	1.98857	0.0518928	0.83686	-4.10963
BBS4	0.317732	-0.0300831	1.98616	0.0521679	0.83686	-4.11129
C2orf69P2	0.186495	0.0487361	1.98595	0.0521912	0.83686	-4.11143
GRAMD1A	0.359849	-0.0109658	1.98561	0.052231	0.83686	-4.11167
COX20P2	0.246607	0.0368028	1.98471	0.0523331	0.83686	-4.11228
STMND1	0.226991	0.0185706	1.98444	0.0523642	0.83686	-4.11247
STXBP2	0.234477	0.0377269	1.98425	0.0523862	0.83686	-4.1126
OR2U2P	0.224505	-0.0451857	1.98422	0.0523891	0.83686	-4.11262
KIF1A	0.179175	0.0563804	1.98394	0.0524212	0.83686	-4.11281
PXN-AS1	0.228726	-0.00860425	1.98155	0.0526969	0.83686	-4.11446
NBPF10	0.228405	0.0266705	1.98085	0.0527779	0.83686	-4.11494
PRM1	0.244191	0.000983991	1.97872	0.0530237	0.83686	-4.1164
TLK2P1	0.22846	-0.0219776	1.97677	0.0532507	0.83686	-4.11774
TTTY11	0.215146	-0.041423	1.97665	0.0532645	0.83686	-4.11783
PHB2P1	0.242317	-0.0232281	1.9765	0.0532822	0.83686	-4.11793
COX6A2	0.190804	0.0201566	1.97639	0.0532943	0.83686	-4.118
GRAMD4P7	0.228657	0.0261488	1.97633	0.0533014	0.83686	-4.11804
HAP1	0.198597	-0.0347754	1.97504	0.0534518	0.83686	-4.11893
R3HDM2P1	0.247698	-0.0976281	1.97398	0.0535756	0.83686	-4.11965
ZFP1	0.189429	0.0255856	1.97396	0.0535783	0.83686	-4.11967
NELFB	0.25105	0.0378547	1.97393	0.053581	0.83686	-4.11969
FAM53A	0.194179	0.00840933	1.97363	0.0536165	0.83686	-4.11989
ANKRD39	0.26013	0.0227503	1.97342	0.0536411	0.83686	-4.12004
MPZL2	0.243596	-0.0545578	1.97334	0.05365	0.83686	-4.12009
SIGLEC28P	0.222749	-0.0232906	1.97333	0.0536514	0.83686	-4.1201
ZNF8	0.20948	0.0109116	1.9723	0.0537721	0.83686	-4.1208
RPL26P34	0.258552	0.0830018	1.97068	0.0539628	0.83686	-4.12191
TGFB2	0.42391	-0.0212279	1.97025	0.0540129	0.83686	-4.12221
DLG1-AS1	0.260392	-0.0444755	1.9701	0.0540308	0.83686	-4.12231
OR52V1P	0.258705	-0.0659232	1.97002	0.0540409	0.83686	-4.12237
HMGN1P16	0.357214	-0.0621595	1.96981	0.0540655	0.83686	-4.12251
PLEKHF1	0.22411	-0.0263961	1.96929	0.0541268	0.83686	-4.12287
XKR3	0.170089	-0.0172552	1.96817	0.0542588	0.83686	-4.12363
OR11H12	0.198606	-0.0588144	1.96744	0.0543455	0.83686	-4.12413
ZSWIM8	0.1752	0.00125706	1.96647	0.0544599	0.83686	-4.12479
CDYL2	0.242553	0.0146098	1.96619	0.0544931	0.83686	-4.12498
NYAP1	0.178593	0.0147407	1.96619	0.0544935	0.83686	-4.12499
NEURL1B	0.262291	0.0632672	1.96615	0.0544977	0.83686	-4.12501
CLEC3B	0.329712	0.0217674	1.96508	0.054625	0.83686	-4.12574
USP9YP34	0.299969	-0.0309547	1.96442	0.054703	0.83686	-4.12619
GDF3	0.237191	-0.0328479	1.96422	0.0547274	0.83686	-4.12633
GOLGA6D	0.254762	0.0102215	1.96416	0.0547341	0.83686	-4.12637
CERS3-AS1	0.193575	-0.0279513	1.96391	0.0547645	0.83686	-4.12654
GYG2	0.530192	0.148244	1.96337	0.054829	0.83686	-4.12691
DNAH8	0.234964	0.0125977	1.96309	0.0548615	0.83686	-4.1271
PDCL	0.231787	0.0152421	1.96259	0.0549219	0.83686	-4.12744
H6PD	0.180885	-0.0275748	1.96165	0.0550346	0.83686	-4.12808
ABCF2P1	0.235775	0.0227405	1.96135	0.0550707	0.83686	-4.12829
CICP5	0.1936	-0.0228012	1.95956	0.0552849	0.83686	-4.12951
C5orf47	0.191099	-0.00770748	1.95852	0.0554098	0.83686	-4.13022
DAW1	0.233208	-0.0701801	1.95819	0.0554496	0.83686	-4.13044
GSG1	0.211779	-0.00390406	1.95804	0.0554671	0.83686	-4.13054
OR5M9	0.21951	0.0349846	1.95716	0.0555731	0.83686	-4.13114
ZFY-AS1	0.295319	0.0246518	1.957	0.0555933	0.83686	-4.13125
ZNF235	0.211046	0.00509799	1.95684	0.0556128	0.83686	-4.13136
CORO1B	0.256963	0.0346168	1.95647	0.0556568	0.83686	-4.13161
TRH	0.290916	0.020218	1.95584	0.0557327	0.83686	-4.13204
SLC13A2	0.236418	-0.000155465	1.95562	0.0557599	0.83686	-4.13219
ZIC4-AS1	0.237535	-0.00878398	1.95525	0.0558049	0.83686	-4.13244
SAXO2	0.206196	-0.0198337	1.95441	0.0559061	0.83686	-4.13301
CLDN10	1.16285	0.335831	1.95437	0.0559107	0.83686	-4.13304
DLG3-AS1	0.178962	-0.0232601	1.95389	0.055969	0.83686	-4.13336
TSPY26P	0.271267	0.073504	1.9532	0.0560528	0.83686	-4.13383
CDR2L	0.269551	0.0174604	1.9532	0.0560534	0.83686	-4.13384
NUP58P1	0.260206	-0.00591338	1.95271	0.0561133	0.83686	-4.13417
KDM2B	0.26878	0.0192182	1.95221	0.0561735	0.83686	-4.13451
NUDT19P4	0.203999	-0.015784	1.95191	0.0562108	0.83686	-4.13471
LKAAEAR1	0.298606	0.0686725	1.95063	0.0563659	0.83686	-4.13558
PIGFP3	0.230723	-0.0149597	1.94828	0.0566546	0.83686	-4.13718
TMEM82	0.282974	-0.0657087	1.94786	0.0567053	0.83686	-4.13746
TP53I13	0.257043	0.00901923	1.94782	0.0567106	0.83686	-4.13749
TANGO2	0.246665	0.00354712	1.94719	0.0567882	0.83686	-4.13792
MAP3K15	0.194395	0.0789391	1.9454	0.0570083	0.83686	-4.13913
DKKL1	0.221613	0.0268378	1.9453	0.0570211	0.83686	-4.1392
PLAGL2	0.386108	0.259816	1.94517	0.0570367	0.83686	-4.13928
CSF1R	0.226259	0.022351	1.9449	0.0570702	0.83686	-4.13947
FFAR1	0.243646	0.0662327	1.94388	0.0571955	0.83686	-4.14015
MXRA7	0.192723	0.0204622	1.94335	0.0572616	0.83686	-4.14052
AKT1S1	0.241838	-0.000867889	1.94201	0.0574277	0.83686	-4.14142
CHRM2	0.239427	-0.0243711	1.94149	0.0574927	0.83686	-4.14178
CDT1	0.205027	0.0144935	1.94134	0.0575109	0.83686	-4.14188
GFOD1	0.250883	-0.115	1.94123	0.0575252	0.83686	-4.14195
RPSAP13	0.241547	0.0116516	1.94115	0.0575346	0.83686	-4.142
C11orf91	0.265532	0.00586698	1.94112	0.0575386	0.83686	-4.14203
CASC21	0.443529	0.266468	1.94044	0.0576233	0.83686	-4.14249
C5orf67	0.247464	-0.0192967	1.94028	0.057643	0.83686	-4.14259
POU6F2	0.44686	0.0945989	1.93959	0.0577293	0.83686	-4.14306
ZNF396	0.221594	-0.0351746	1.93883	0.0578231	0.83686	-4.14357
PWRN3	0.253629	-0.0586621	1.93809	0.0579154	0.83686	-4.14407
CD200R1L	0.293949	0.0542503	1.93751	0.0579884	0.83686	-4.14446
MRPL23	0.216961	0.00808745	1.93729	0.0580156	0.83686	-4.14461
OCA2	0.235029	0.0196036	1.93721	0.0580266	0.83686	-4.14467
CNTN4-AS2	0.266849	0.0938688	1.93717	0.0580312	0.83686	-4.14469
VMAC	0.217769	0.0285727	1.93695	0.0580586	0.83686	-4.14484
CEP164	0.227803	0.0649126	1.93618	0.0581546	0.83686	-4.14536
RRNAD1	0.224539	-0.00351828	1.93597	0.0581815	0.83686	-4.1455
RPL7P34	0.181785	-0.0388696	1.93561	0.0582263	0.83686	-4.14574
OR10J7P	0.206614	0.0288149	1.93559	0.0582287	0.83686	-4.14576
ALYREF	0.291618	0.045828	1.93529	0.0582664	0.83686	-4.14596
MED16	0.170809	-0.0302017	1.93462	0.0583507	0.83686	-4.14641
EGFLAM-AS1	0.242408	-0.00400199	1.9346	0.0583538	0.83686	-4.14643
CDC20B	0.207105	0.0184429	1.9345	0.0583659	0.83686	-4.14649
GGT5	0.209901	-0.0383201	1.93394	0.0584368	0.83686	-4.14687
CYP11B1	0.202184	0.0358717	1.93389	0.0584429	0.83686	-4.14691
PROKR1	0.189628	-0.0199137	1.93324	0.0585249	0.83686	-4.14735
BCKDK	0.221229	0.0628695	1.93315	0.0585364	0.83686	-4.14741
COLEC10	0.232472	-0.0126043	1.93307	0.0585459	0.83686	-4.14746
XRRA1	0.236878	0.0517238	1.93274	0.058588	0.83686	-4.14768
ZNF511	0.239277	0.115831	1.93176	0.0587121	0.83686	-4.14834
ETV5-AS1	0.224259	0.0128654	1.9315	0.0587445	0.83686	-4.14852
TRAV19	0.265496	-0.0078288	1.93102	0.0588052	0.83686	-4.14884
IL12A	0.218135	0.0021338	1.93046	0.0588769	0.83686	-4.14922
GABRA3	0.297545	0.013524	1.93025	0.0589033	0.83686	-4.14936
IGHVII-33-1	0.244504	-0.0180222	1.93016	0.0589148	0.83686	-4.14942
AKAP14	0.263181	-0.0350218	1.92966	0.0589775	0.83686	-4.14975
SNAR-F	0.580761	0.31617	1.9296	0.0589851	0.83686	-4.14979
GAB4	0.222221	-0.0249413	1.92907	0.0590529	0.83686	-4.15015
FGF3	0.215112	0.0239626	1.92904	0.0590569	0.83686	-4.15018
ST13P12	0.255983	-0.00744936	1.929	0.0590622	0.83686	-4.1502
LONRF2P2	0.220743	0.018822	1.92712	0.0593006	0.83686	-4.15146
BPIFB3	0.22376	0.0610752	1.9271	0.0593043	0.83686	-4.15148
CNTNAP3P1	0.253261	0.00651116	1.926	0.0594444	0.83686	-4.15222
MRPS17P9	0.257416	0.0369455	1.92596	0.0594488	0.83686	-4.15224
TNFRSF13B	0.177389	0.0149835	1.92588	0.0594592	0.83686	-4.1523
SLC2A13P1	0.246411	-0.0695466	1.92571	0.0594819	0.83686	-4.15242
IGF2-AS	0.210364	-0.00740794	1.9256	0.0594955	0.83686	-4.15249
GPS2P1	0.211244	-0.000187173	1.92502	0.0595692	0.836969	-4.15288
EN1	0.195907	-0.000954572	1.92464	0.0596185	0.836969	-4.15313
PTPRF	0.227154	-0.0774642	1.92458	0.0596258	0.836969	-4.15317
RBMXP4	0.235754	0.00741226	1.92381	0.059725	0.837225	-4.15369
HNRNPA1P20	0.227757	0.00852022	1.92379	0.0597275	0.837225	-4.15371
IL36B	0.269662	0.0467296	1.92335	0.0597831	0.837225	-4.154
LCN6	0.210769	0.0313247	1.92324	0.0597974	0.837225	-4.15407
ECT2L	0.219995	-0.0249086	1.92101	0.0600851	0.838727	-4.15557
NAT9	0.213044	0.044374	1.92083	0.0601086	0.838727	-4.15569
BCKDHA	0.257963	0.0260713	1.92	0.0602154	0.838727	-4.15625
SYF2P1	0.247636	-0.0561376	1.91887	0.060362	0.838727	-4.15701
ARL6	0.342916	0.0169633	1.91754	0.0605337	0.838727	-4.15789
PHBP19	0.228299	0.018791	1.91597	0.060738	0.838727	-4.15895
PSMC1P8	0.229574	0.0226915	1.91529	0.0608269	0.838727	-4.1594
FBXL19-AS1	0.234907	0.06437	1.91524	0.0608334	0.838727	-4.15944
ABCC8	0.250736	0.0614008	1.91504	0.0608587	0.838727	-4.15957
OTUD3	0.207005	-0.0342729	1.9149	0.0608774	0.838727	-4.15966
SNORA4	0.327492	0.0493341	1.9148	0.06089	0.838727	-4.15973
PSMC3	0.170215	0.030208	1.91479	0.0608913	0.838727	-4.15973
CALML6	0.175718	-0.0168224	1.91436	0.0609477	0.838727	-4.16002
ABCD1P2	0.17527	-0.0170707	1.91405	0.0609888	0.838727	-4.16023
KLF12	0.354773	-0.118266	1.91384	0.0610162	0.838727	-4.16037
PPP1R3A	0.322198	0.00822694	1.9133	0.0610865	0.838727	-4.16073
FBLIM1	0.184271	-0.00318925	1.91316	0.0611043	0.838727	-4.16082
AGBL1	0.205799	-0.0263856	1.91226	0.0612223	0.838727	-4.16143
C6orf163	0.231924	0.0675195	1.91213	0.0612397	0.838727	-4.16152
UNC119B	0.404468	-0.0108997	1.91212	0.0612408	0.838727	-4.16152
TPPP	0.255233	0.0258333	1.91135	0.0613418	0.838727	-4.16204
PPIP5K1	0.294831	0.023382	1.91125	0.0613547	0.838727	-4.1621
SP5	0.266439	0.0679999	1.91077	0.0614184	0.838727	-4.16243
LPL	0.254613	0.0727206	1.90944	0.0615935	0.838727	-4.16331
WDR6	0.185117	0.00360187	1.90907	0.0616416	0.838727	-4.16356
MEGF6	0.221977	0.0349499	1.90501	0.0621792	0.838727	-4.16627
RSPO1	0.228421	-0.0348947	1.9049	0.0621933	0.838727	-4.16634
ACVR1B	0.231188	0.0457712	1.90474	0.0622153	0.838727	-4.16645
OR5B1P	0.24104	0.0695487	1.90458	0.0622361	0.838727	-4.16655
RRM2P3	0.186527	0.0236311	1.90453	0.0622428	0.838727	-4.16659
TAS2R50	0.226868	-0.029216	1.90413	0.0622959	0.838727	-4.16685
SSBP4	0.229096	0.0262897	1.90399	0.0623154	0.838727	-4.16695
KAZN	0.194529	0.00680459	1.90337	0.0623973	0.838727	-4.16736
OOSP1	0.225337	-0.00712113	1.9028	0.0624732	0.838727	-4.16774
KRT17P3	0.234564	0.0273975	1.90251	0.0625125	0.838727	-4.16794
OR56A5	0.309375	0.12969	1.90246	0.0625184	0.838727	-4.16796
PLA2G3	0.232082	0.0799813	1.90221	0.0625517	0.838727	-4.16813
SUDS3P1	0.232855	0.0426148	1.9007	0.0627545	0.838727	-4.16914
ADAMTS13	0.259749	0.00264167	1.9002	0.0628208	0.838727	-4.16947
CDRT7	0.209099	0.00573645	1.89978	0.0628768	0.838727	-4.16975
ANKRD20A5P	0.209224	-0.0246771	1.89964	0.0628959	0.838727	-4.16984
PSKH1	0.197613	-0.0494192	1.89928	0.0629438	0.838727	-4.17008
NCAN	0.228145	-0.0172341	1.89916	0.0629601	0.838727	-4.17016
MTND6P9	0.206943	0.00032749	1.89914	0.0629633	0.838727	-4.17018
RRM2	0.259022	0.0546128	1.89872	0.0630194	0.838727	-4.17045
FAM219B	0.236704	-0.0180836	1.89861	0.0630344	0.838727	-4.17053
CBL	0.286177	-0.0656743	1.89821	0.0630875	0.838727	-4.17079
PSMD10P3	0.272075	0.00854565	1.89772	0.0631543	0.838727	-4.17112
GRM7-AS1	0.202686	-0.0571701	1.89637	0.063336	0.838727	-4.17202
IL20RB-AS1	0.221384	-0.0583655	1.89623	0.063354	0.838727	-4.1721
OR10A3	0.278938	-0.0281775	1.89611	0.0633705	0.838727	-4.17219
CEACAMP9	0.237332	0.00305003	1.89608	0.0633749	0.838727	-4.17221
RRH	0.298173	0.0310915	1.8944	0.0636026	0.838727	-4.17333
ECH1	0.1716	0.0213328	1.89301	0.0637905	0.838727	-4.17424
VN1R67P	0.224875	-0.0188494	1.89288	0.063808	0.838727	-4.17433
GEM	0.211904	-0.0596531	1.89269	0.0638344	0.838727	-4.17446
NDUFS5P5	0.28742	0.082313	1.89227	0.0638906	0.838727	-4.17473
KHDC3L	0.185205	0.0344111	1.89224	0.0638955	0.838727	-4.17476
OR5H2	0.197629	0.0137459	1.89205	0.0639203	0.838727	-4.17488
KRT8P40	0.240038	0.048668	1.89198	0.06393	0.838727	-4.17493
DDX43P1	0.170334	-0.0107128	1.89195	0.0639338	0.838727	-4.17494
MBL3P	0.183082	0.0910056	1.8918	0.063955	0.838727	-4.17505
OGG1	0.288105	0.0565477	1.88982	0.0642252	0.838727	-4.17636
SERPINA2	0.240231	0.0455156	1.88917	0.0643127	0.838727	-4.17678
C11orf95	0.174303	-0.0168989	1.889	0.0643367	0.838727	-4.1769
GPC5	0.201947	-0.00103338	1.8889	0.0643498	0.838727	-4.17696
IGLL3P	0.175618	-0.0453335	1.88809	0.0644616	0.838727	-4.17751
ANKLE2	0.24755	-0.0655545	1.88705	0.0646031	0.838727	-4.17819
GLDC	0.300092	-0.000612151	1.88613	0.0647294	0.838727	-4.1788
PGLYRP4	0.271629	-0.0540383	1.88581	0.0647736	0.838727	-4.17901
CREB3L3	0.193324	0.0745391	1.88554	0.0648114	0.838727	-4.17919
DUTP7	0.205825	-0.0375835	1.88509	0.0648736	0.838727	-4.17949
PLCD4	0.228456	-0.00272529	1.88508	0.0648738	0.838727	-4.17949
UCP1	0.225883	0.0278834	1.88492	0.064896	0.838727	-4.1796
SNRPCP20	0.193172	0.0519632	1.88418	0.0649988	0.838727	-4.18009
CA1	0.365748	-0.560105	1.88286	0.0651811	0.838727	-4.18096
CCDC106	0.171145	-0.0117576	1.88249	0.0652319	0.838727	-4.1812
VN1R53P	0.208284	-0.0142312	1.88169	0.065342	0.838727	-4.18173
PLA2G4C-AS1	0.202058	0.0023354	1.88146	0.0653743	0.838727	-4.18188
TRBV7-7	0.208303	0.00718541	1.88141	0.0653818	0.838727	-4.18192
EML3	0.172519	0.0307371	1.88078	0.0654683	0.838727	-4.18233
CD5	0.26589	0.0199513	1.88077	0.0654701	0.838727	-4.18234
USP17L22	0.184352	-0.0232247	1.88047	0.0655123	0.838727	-4.18254
ZNF557	0.180459	-0.0385796	1.88035	0.065528	0.838727	-4.18261
GGTLC4P	0.220215	0.00945387	1.88016	0.0655545	0.838727	-4.18274
PRSS21	0.197386	-0.0425443	1.8793	0.0656738	0.838727	-4.18331
THSD4	0.38051	-0.15481	1.8784	0.0658002	0.838727	-4.1839
PINK1	0.187904	0.0600808	1.87824	0.0658213	0.838727	-4.184
CETP	0.206445	-0.0136743	1.87813	0.0658371	0.838727	-4.18408
PAPOLB	0.205554	0.00929859	1.87743	0.0659346	0.838727	-4.18454
PIM3	0.228651	-0.00859766	1.87675	0.0660299	0.838727	-4.18499
DEFB104A	0.216639	-0.032258	1.8766	0.0660513	0.838727	-4.18509
PAGE2	0.294276	0.0283133	1.87638	0.0660811	0.838727	-4.18523
RPS12P2	0.198192	0.00833384	1.87602	0.0661328	0.838727	-4.18547
MAGEC1	0.181049	-0.0260281	1.87588	0.0661515	0.838727	-4.18556
SCN2B	0.170825	-0.0355652	1.87584	0.0661567	0.838727	-4.18559
ELAVL4	0.217856	-0.0470053	1.87502	0.0662727	0.838727	-4.18613
ARG1	0.252206	-0.0131587	1.87496	0.0662805	0.838727	-4.18617
IPO8	0.213128	0.00680334	1.87495	0.0662824	0.838727	-4.18618
ASS1P2	0.251835	0.0426222	1.87485	0.0662953	0.838727	-4.18624
LMNB2	0.320714	0.0496504	1.87452	0.0663425	0.838727	-4.18646
WDR13	0.222383	0.0135814	1.8745	0.0663452	0.838727	-4.18647
LDLRAD1	0.197561	-0.00764974	1.87437	0.0663637	0.838727	-4.18656
PDK3	0.275841	0.207862	1.87377	0.066447	0.838727	-4.18695
C5orf66-AS1	0.24253	0.042511	1.87281	0.0665823	0.838727	-4.18758
RPS17P11	0.227331	-0.0726853	1.87244	0.0666346	0.838727	-4.18782
PHTF1	0.214049	-0.0401113	1.87243	0.0666356	0.838727	-4.18783
GSX2	0.214127	0.0230309	1.87196	0.066702	0.838727	-4.18814
CASP16P	0.197308	-0.0014685	1.87049	0.0669104	0.838727	-4.18911
CCDC182	0.170982	-0.00350677	1.86968	0.0670239	0.838727	-4.18964
EFCAB8	0.293613	-0.0884731	1.8695	0.0670491	0.838727	-4.18975
CTXN3	0.198623	-0.00384733	1.86946	0.067055	0.838727	-4.18978
HCG4P5	0.194995	-0.0331039	1.86904	0.0671152	0.838727	-4.19006
SMNDC1	0.250443	0.0766274	1.86788	0.0672797	0.838727	-4.19082
TATDN2P1	0.258943	0.0353148	1.86735	0.0673554	0.838727	-4.19117
LUNAR1	0.197919	0.0159693	1.86714	0.0673846	0.838727	-4.1913
PHC1	0.229502	0.0609358	1.86707	0.0673942	0.838727	-4.19135
RPS29P13	0.189662	-0.0246962	1.86699	0.0674066	0.838727	-4.1914
RUSC1-AS1	0.202263	0.0118867	1.86675	0.0674405	0.838727	-4.19156
LPAR3	0.243894	-0.061479	1.86644	0.0674837	0.838727	-4.19176
TAS2R39	0.186083	0.0030146	1.86643	0.0674851	0.838727	-4.19177
PLXNA4	0.203978	0.0323501	1.86638	0.0674922	0.838727	-4.1918
CEP57L1P1	0.226549	0.000780397	1.86577	0.0675793	0.838727	-4.1922
MTCYBP29	0.240368	-0.00398029	1.86485	0.0677107	0.838727	-4.1928
FDXR	0.267262	-0.0700247	1.86484	0.0677123	0.838727	-4.19281
RPL23AP85	0.298139	0.0558204	1.86454	0.0677555	0.838727	-4.19301
SPHKAP	0.286193	0.0220462	1.86425	0.0677965	0.838727	-4.1932
ARSDP1	0.252795	0.00964543	1.86363	0.0678851	0.838727	-4.1936
CKAP4	0.19471	-0.0407549	1.86283	0.0679993	0.838727	-4.19413
MRPL54	0.216318	-0.0107377	1.86271	0.0680177	0.838727	-4.19421
DAO	0.252124	0.045468	1.86234	0.0680697	0.838727	-4.19445
SPDYA	0.217578	-0.00353209	1.86141	0.0682034	0.838727	-4.19506
SLC14A1	0.48	-0.00385228	1.86134	0.0682138	0.838727	-4.1951
KRT10	0.196675	-0.0174758	1.86034	0.0683577	0.838727	-4.19576
PPP1R26-AS1	0.248009	0.0549391	1.85992	0.0684182	0.838727	-4.19603
ALDOC	0.186819	0.0402855	1.85934	0.068502	0.838727	-4.19641
SNCG	0.195453	0.0230725	1.85878	0.0685825	0.838727	-4.19678
NDUFB11P1	0.184546	0.0300539	1.85802	0.0686915	0.838727	-4.19727
PCDHB19P	0.206151	0.0359188	1.85774	0.0687318	0.838727	-4.19745
CCDC113	0.209175	0.0239276	1.85763	0.0687487	0.838727	-4.19753
PDZRN4	0.252439	-0.0534227	1.85751	0.0687664	0.838727	-4.19761
FGFR3P6	0.196276	0.0283781	1.85725	0.0688032	0.838727	-4.19778
DPEP3	0.20267	0.0966561	1.85691	0.068853	0.838727	-4.198
MRPL37P1	0.213901	0.041071	1.85689	0.0688558	0.838727	-4.19801
FAIM2	0.467377	-0.0616953	1.85635	0.0689338	0.838727	-4.19836
ATP2B3	0.162254	0.00899868	1.85605	0.0689768	0.838727	-4.19856
THRB-AS1	0.217624	-0.0758772	1.855	0.0691295	0.839349	-4.19924
XAGE5	0.274399	0.0556326	1.85492	0.0691413	0.839349	-4.1993
MAP3K9	0.28855	-0.0025554	1.85284	0.0694435	0.839722	-4.20065
GNAT3	0.271124	0.0187279	1.85239	0.0695092	0.839722	-4.20094
IRX1P1	0.221233	-0.0191367	1.85238	0.0695114	0.839722	-4.20095
PLCG1-AS1	0.19282	0.0273001	1.85211	0.0695504	0.839722	-4.20113
SPINK14	0.181558	-0.0359062	1.85209	0.0695528	0.839722	-4.20114
TSPY15P	0.177223	0.0260511	1.8515	0.0696395	0.839722	-4.20153
UMOD	0.17623	-0.0429275	1.85116	0.0696894	0.839722	-4.20175
GSDMA	0.195426	-0.0098157	1.85034	0.0698097	0.839722	-4.20228
RFX8	0.199903	-0.057536	1.84996	0.0698656	0.839722	-4.20253
TULP4	0.193993	-0.0098894	1.84967	0.069907	0.839722	-4.20271
HCLS1	0.21815	-0.0607038	1.84908	0.0699947	0.839722	-4.2031
C9orf163	0.259562	0.0106333	1.84807	0.0701433	0.839722	-4.20376
SLC18A2	0.232195	-0.0039004	1.84782	0.070179	0.839722	-4.20392
ZMAT4	0.233111	0.00788333	1.84728	0.070259	0.839722	-4.20427
NELL2	0.233513	-0.0431755	1.84698	0.0703038	0.839722	-4.20447
DHRS4L1	0.20703	0.015344	1.84697	0.0703043	0.839722	-4.20447
USP9YP6	0.203818	-0.0546085	1.84669	0.0703466	0.839722	-4.20466
GRIN2B	0.485444	0.197199	1.8458	0.0704771	0.839722	-4.20523
HES7	0.226288	0.0612502	1.84542	0.0705329	0.839722	-4.20548
SYNGR3	0.279045	0.00435406	1.84527	0.0705562	0.839722	-4.20558
RYR2	0.234355	-0.114779	1.84435	0.0706915	0.839722	-4.20618
SUMO2P3	0.271676	0.0562797	1.84423	0.0707087	0.839722	-4.20625
EPM2AIP1	0.299234	0.00582546	1.84347	0.0708218	0.839722	-4.20675
TDRP	0.251358	0.0149004	1.84318	0.0708656	0.839722	-4.20694
MTCO3P4	0.226105	0.000205785	1.84235	0.0709883	0.839722	-4.20748
NCK2	0.1933	0.0279357	1.84223	0.0710062	0.839722	-4.20755
ZCWPW1	0.253332	-0.0539349	1.8418	0.0710696	0.839722	-4.20783
HCG14	0.250574	-0.0415865	1.84176	0.0710763	0.839722	-4.20786
CGB2	0.262911	-0.0430636	1.84149	0.0711155	0.839722	-4.20803
MAGEB16	0.213948	-0.0508316	1.84131	0.0711424	0.839722	-4.20815
IFNA21	0.202617	0.00614198	1.8413	0.0711452	0.839722	-4.20816
KATNBL1P5	0.217006	0.00388274	1.84117	0.0711641	0.839722	-4.20824
CFD	0.201148	0.0174337	1.84094	0.0711978	0.839722	-4.20839
GNRHR2	0.221944	-0.00823867	1.84051	0.0712626	0.839722	-4.20867
ZNF658	0.252582	-0.013243	1.84008	0.0713263	0.839722	-4.20895
MARK4	0.220903	-0.00935395	1.83881	0.0715161	0.839722	-4.20977
CCND2-AS1	0.195201	-0.0419319	1.83859	0.0715494	0.839722	-4.20992
RPS29P25	0.179316	-0.024348	1.83784	0.0716616	0.839722	-4.2104
TMEM179	0.223908	0.0606258	1.83708	0.0717746	0.839722	-4.21089
NTRK3-AS1	0.223282	-0.003313	1.83642	0.0718739	0.839722	-4.21132
GPC1	0.238725	0.0407699	1.83608	0.0719253	0.839722	-4.21154
VAT1L	0.242665	-0.018793	1.83539	0.0720291	0.839722	-4.21199
SCGB1B2P	0.21506	-0.0253016	1.83532	0.0720391	0.839722	-4.21203
PLEKHA8P1	0.204402	-0.0135931	1.83513	0.0720681	0.839722	-4.21215
RBM19	0.212395	0.0236591	1.83507	0.0720764	0.839722	-4.21219
CCL23	0.33531	0.0232657	1.83491	0.0721004	0.839722	-4.21229
GSC	0.211372	-0.0469048	1.8345	0.072163	0.839722	-4.21256
ZSCAN20	0.18124	-0.0627878	1.83383	0.0722633	0.839722	-4.21299
IGHVIII-26-1	0.255168	0.00441401	1.83315	0.0723661	0.839722	-4.21343
BRSK1	0.186783	0.0444294	1.83292	0.0724015	0.839722	-4.21358
TIGD4	0.252894	0.0725605	1.83227	0.0724993	0.840143	-4.214
MYEF2	0.561958	0.11094	1.83165	0.0725927	0.840201	-4.2144
SEPHS1P4	0.225434	0.0977222	1.83029	0.0727999	0.840201	-4.21528
LRRC74A	0.212033	-0.0268948	1.83009	0.0728294	0.840201	-4.21541
NMNAT1P1	0.203543	-0.0251702	1.8296	0.0729045	0.840201	-4.21573
MTCYBP24	0.224968	-0.0186359	1.82959	0.0729057	0.840201	-4.21573
KIAA0895	0.29557	0.0329471	1.82951	0.0729178	0.840201	-4.21578
TMEM212-AS1	0.242084	0.0374508	1.82926	0.0729551	0.840201	-4.21594
TMEM207	0.31505	0.0784479	1.82852	0.0730685	0.840201	-4.21642
ZNF90P2	0.236934	0.00262667	1.82699	0.0733013	0.840201	-4.21741
PITPNC1	0.276183	-0.00164243	1.82696	0.0733064	0.840201	-4.21743
ABT1P1	0.23123	0.00662202	1.82689	0.0733173	0.840201	-4.21747
WDR38	0.19947	0.0246512	1.82684	0.0733238	0.840201	-4.2175
MIATNB	0.215715	0.0251015	1.82656	0.0733672	0.840201	-4.21768
NGB	0.274602	-0.0301875	1.8264	0.0733924	0.840201	-4.21779
MRLN	0.319716	0.108133	1.82593	0.073463	0.840201	-4.21809
PRAMEF12	0.191942	0.0556953	1.82561	0.0735127	0.840201	-4.2183
TET1P1	0.233349	0.061998	1.82554	0.0735234	0.840201	-4.21834
TGM3	0.190243	0.0441001	1.82395	0.0737664	0.840201	-4.21936
RASSF10	0.183247	-0.0463922	1.82388	0.073777	0.840201	-4.21941
GSTA8P	0.242208	0.0390601	1.82353	0.0738315	0.840201	-4.21964
HNRNPA3P4	0.211122	-0.0361166	1.8229	0.0739275	0.840201	-4.22004
NEK2	0.2088	0.0856195	1.82289	0.073929	0.840201	-4.22004
FCF1P3	0.19373	-0.0337984	1.82192	0.0740783	0.840251	-4.22067
FGF12	0.214488	-0.0527073	1.82135	0.0741665	0.840903	-4.22104
PMEPA1	0.336724	0.136605	1.82046	0.0743045	0.84166	-4.22161
B4GALNT2P1	0.228866	0.00844799	1.81999	0.0743768	0.841877	-4.22191
GOLGA2P7	0.192973	-0.0040452	1.81933	0.0744781	0.84211	-4.22233
AP1S1	0.245671	0.0774437	1.81739	0.0747789	0.842622	-4.22358
NF2	0.218237	0.0287278	1.81675	0.074879	0.842622	-4.22399
GTF2F2P2	0.246715	0.0190797	1.81629	0.0749502	0.842622	-4.22429
RUNDC3A	0.269192	0.0546006	1.81611	0.0749782	0.842622	-4.2244
RPL29P22	0.184133	-0.0103387	1.81605	0.0749881	0.842622	-4.22444
TTC7B	0.26323	-0.0157095	1.81551	0.0750713	0.842622	-4.22479
MKRN5P	0.277032	0.0832356	1.81536	0.075095	0.842622	-4.22488
UTP23	0.227859	0.0348815	1.81471	0.075197	0.842622	-4.2253
LRRC4B	0.26255	-0.0699002	1.81436	0.0752516	0.842622	-4.22553
CYP17A1-AS1	0.170823	0.0533997	1.81409	0.0752934	0.842622	-4.2257
SYNC	0.290066	0.0145785	1.81405	0.0752988	0.842622	-4.22572
PISD	0.245567	0.0710376	1.81365	0.0753619	0.842622	-4.22598
DNAJC14	0.229829	0.0245967	1.8134	0.0754004	0.842622	-4.22614
ERF	0.16837	0.00672255	1.81331	0.0754142	0.842622	-4.22619
ABCB9	0.17503	0.0280534	1.8129	0.0754798	0.842622	-4.22646
FSTL1	0.28155	-0.169073	1.81288	0.075483	0.842622	-4.22648
CPT1A	0.208094	-0.0345476	1.81263	0.0755218	0.842622	-4.22663
AS3MT	0.2069	-0.0173802	1.81141	0.0757132	0.843422	-4.22742
MEPE	0.193441	-0.0882205	1.81093	0.0757876	0.843422	-4.22772
ASAP3	0.221276	-0.0893656	1.81012	0.0759154	0.843422	-4.22824
RPS15AP34	0.244104	0.0736514	1.80968	0.0759848	0.843422	-4.22852
MED28P1	0.240246	0.0406908	1.80929	0.0760454	0.843422	-4.22877
PAH	0.370242	0.0799071	1.80902	0.0760877	0.843422	-4.22894
LETM1P2	0.227175	-0.066035	1.80864	0.0761488	0.843431	-4.22919
ALKBH2	0.169011	0.01291	1.80851	0.0761692	0.843431	-4.22927
ESR1	0.212604	-0.0674598	1.80794	0.0762592	0.843431	-4.22964
OR52K2	0.206921	-0.0594462	1.80687	0.0764278	0.843431	-4.23032
ERICH6B	0.201245	0.00801526	1.80685	0.0764312	0.843431	-4.23033
BEND3	0.236712	0.0570708	1.80607	0.0765533	0.843431	-4.23082
HPCA	0.226005	0.0509793	1.80582	0.076593	0.843431	-4.23098
SNED1	0.274894	0.0296698	1.80548	0.0766475	0.843431	-4.2312
NKX1-2	0.207915	-0.00361483	1.80524	0.0766851	0.843431	-4.23136
NUDT1	0.176099	0.0261126	1.80424	0.0768448	0.843431	-4.232
MTCYBP19	0.165931	-0.02378	1.80404	0.0768758	0.843431	-4.23212
NRG1-IT3	0.256084	0.0628921	1.80377	0.076919	0.843431	-4.2323
GIMAP3P	0.251913	0.0289927	1.80281	0.077071	0.843431	-4.2329
E4F1	0.23101	-0.0135642	1.80252	0.0771179	0.843431	-4.23309
GPN3P1	0.240239	-0.00675261	1.80215	0.0771769	0.843431	-4.23333
POTEB2	0.233255	0.0441955	1.802	0.0771999	0.843431	-4.23342
XXYLT1-AS2	0.295974	2.95792e-05	1.80161	0.0772625	0.843431	-4.23367
SNF8	0.204682	0.0186153	1.80104	0.0773538	0.843431	-4.23404
PDILT	0.167153	-0.022225	1.80092	0.0773734	0.843431	-4.23411
TROAP	0.239897	0.167674	1.80032	0.0774695	0.843431	-4.2345
KRT8P17	0.199482	0.0595113	1.79955	0.0775917	0.843431	-4.23498
MTND4P21	0.168716	-0.0473965	1.79954	0.0775929	0.843431	-4.23499
SALL2	0.205461	0.0197443	1.79952	0.0775963	0.843431	-4.235
SAPCD2P1	0.267444	0.0326494	1.79888	0.0776991	0.843431	-4.23541
SLC39A12	0.192399	-0.0523962	1.79849	0.0777613	0.843431	-4.23566
ZNF720	0.200216	-0.00482502	1.79821	0.0778069	0.843431	-4.23584
PHLDB3	0.179035	0.00292682	1.79743	0.0779324	0.843431	-4.23633
KRT18P8	0.278612	-0.0268812	1.79722	0.0779655	0.843431	-4.23646
FAM218BP	0.184048	0.0928056	1.7972	0.0779687	0.843431	-4.23648
ANKRD34B	0.236897	0.0224292	1.79705	0.0779934	0.843431	-4.23658
RGS3	0.198191	-0.0295198	1.79695	0.0780101	0.843431	-4.23664
TIGD6	0.226194	-0.0100901	1.79672	0.0780457	0.843431	-4.23678
SUMO2P13	0.212429	0.0219465	1.79618	0.0781338	0.843431	-4.23713
ANGPTL6	0.208516	-0.0221045	1.79596	0.0781687	0.843431	-4.23727
C16orf92	0.181556	0.0761543	1.79519	0.0782926	0.843431	-4.23776
GADD45A	0.180289	0.00880852	1.79504	0.0783173	0.843431	-4.23785
INSRR	0.189071	0.0185553	1.79492	0.0783364	0.843431	-4.23793
C10orf99	0.243214	0.00182786	1.79488	0.0783423	0.843431	-4.23795
KLF2P3	0.259547	-0.0105829	1.79476	0.0783616	0.843431	-4.23803
TP53TG3HP	0.212336	-0.0207293	1.79459	0.0783904	0.843431	-4.23814
UBTD1	0.143493	-0.00236111	1.79449	0.0784051	0.843431	-4.2382
YRDCP2	0.209044	0.0826668	1.79342	0.0785786	0.843431	-4.23888
SFI1	0.24565	-0.0297415	1.79329	0.0786004	0.843431	-4.23897
LTC4S	0.255393	0.0311681	1.7931	0.0786298	0.843431	-4.23908
CYP24A1	0.209628	0.00204661	1.79294	0.0786564	0.843431	-4.23919
GOLGA2P2Y	0.21015	0.0564662	1.79293	0.0786583	0.843431	-4.23919
PRKACG	0.202538	-0.0142555	1.79256	0.078718	0.843431	-4.23943
SEC1P	0.235251	0.0326321	1.79241	0.0787421	0.843431	-4.23952
PRODH2	0.247643	0.0934494	1.79226	0.0787666	0.843431	-4.23962
ZNF202	0.148883	-0.0110022	1.79202	0.078806	0.843431	-4.23977
HMGN1P5	0.180526	0.0105987	1.79129	0.0789238	0.843431	-4.24023
SNX18P26	0.163599	-0.0455981	1.79116	0.0789445	0.843431	-4.24031
SOCS3	0.205444	0.00252171	1.79021	0.0790991	0.843431	-4.24092
CNTN2	0.209865	0.0534428	1.78973	0.0791771	0.843431	-4.24122
D2HGDH	0.170863	0.0123467	1.78873	0.0793406	0.843431	-4.24185
FAM8A6P	0.169504	0.11576	1.78847	0.0793832	0.843431	-4.24202
SLC6A19	0.233934	0.033357	1.78788	0.0794789	0.843431	-4.24239
FBP2	0.227769	-0.0224624	1.78776	0.0794991	0.843431	-4.24247
TSPY25P	0.255026	-0.00217816	1.78628	0.0797406	0.843431	-4.2434
ST6GALNAC1	0.387103	-0.144691	1.78593	0.0797986	0.843431	-4.24363
F10	0.25503	-0.0118909	1.78534	0.0798957	0.843431	-4.244
WDR87	0.236696	0.0567988	1.78505	0.079943	0.843431	-4.24418
MMP21	0.247374	-0.0504913	1.78477	0.0799894	0.843431	-4.24436
PABPC1L2B-AS1	0.23402	-0.0432921	1.78439	0.0800512	0.843431	-4.2446
IPO9-AS1	0.204832	0.0465939	1.78395	0.0801241	0.843431	-4.24488
ABCG8	0.197816	0.0118778	1.78363	0.0801769	0.843431	-4.24508
BAALC	0.214689	-0.0299942	1.78333	0.0802254	0.843431	-4.24527
SLC12A1	0.193567	-0.0232585	1.78325	0.0802385	0.843431	-4.24532
ELMO3	0.227934	0.0503906	1.78316	0.0802541	0.843431	-4.24538
HCP5	0.186793	0.0444295	1.78253	0.080358	0.843431	-4.24578
WDFY3	0.226266	-0.0117468	1.78225	0.0804034	0.843431	-4.24595
CCDC136	0.226359	0.012537	1.78124	0.080571	0.843431	-4.24659
MGAT4C	0.14932	-0.0861935	1.78122	0.0805745	0.843431	-4.24661
MDC1	0.195162	-0.017694	1.78116	0.0805835	0.843431	-4.24664
SLC9A2	0.603947	-0.174094	1.78106	0.0805998	0.843431	-4.2467
AHSP	0.218871	0.0335524	1.78069	0.0806618	0.843431	-4.24694
TRBV25OR9-2	0.22035	0.010485	1.78062	0.0806734	0.843431	-4.24699
KRT222	0.250791	-0.0492831	1.78016	0.0807489	0.843431	-4.24727
SHKBP1	0.218042	0.00408707	1.77997	0.0807809	0.843431	-4.2474
C17orf75	0.218271	0.00205988	1.77984	0.0808018	0.843431	-4.24747
ASS1P12	0.216235	0.0119892	1.77981	0.0808077	0.843431	-4.2475
ING3	0.199056	0.0655043	1.77928	0.0808957	0.843431	-4.24783
KIF4CP	0.198381	-0.0408819	1.7789	0.0809578	0.843431	-4.24807
IFFO2	0.263348	0.0477994	1.77846	0.081031	0.843431	-4.24835
SYNE4	0.255113	0.0998081	1.77797	0.0811122	0.843431	-4.24865
KATNBL1P4	0.168168	-0.0153712	1.77783	0.0811361	0.843431	-4.24875
GNA14	0.240739	-0.0998086	1.77776	0.0811468	0.843431	-4.24879
AURKAIP1	0.246997	0.0714879	1.77726	0.0812298	0.843431	-4.2491
C10orf88	0.273873	0.0500618	1.77683	0.0813011	0.843431	-4.24937
RAPGEF4	0.185335	-0.0222333	1.7766	0.0813402	0.843431	-4.24952
FMO4	0.26422	0.000344993	1.77601	0.0814393	0.843473	-4.24989
TNIP2	0.254305	-0.0902858	1.77593	0.0814512	0.843473	-4.24994
ZYG11B	0.217019	0.0382384	1.77569	0.0814914	0.843473	-4.25009
AGRP	0.221537	-0.000866052	1.7744	0.0817067	0.843477	-4.2509
NCAM2	0.271244	0.0261269	1.77405	0.0817662	0.843477	-4.25113
TP53I11	0.25398	-0.00644466	1.77262	0.0820061	0.843477	-4.25203
ACTR3BP3	0.210955	-0.0678454	1.77255	0.0820178	0.843477	-4.25207
EIF4A1P12	0.248759	0.0399571	1.77252	0.0820222	0.843477	-4.25209
NRSN1	0.236308	-0.0866277	1.77246	0.0820314	0.843477	-4.25212
EGR4	0.189119	0.0450386	1.77236	0.0820487	0.843477	-4.25219
NCLP2	0.240269	0.0322342	1.77222	0.0820728	0.843477	-4.25228
FLJ13224	0.236597	0.0302527	1.77187	0.0821312	0.843477	-4.25249
CLPTM1L	0.378967	0.0560409	1.77167	0.0821645	0.843477	-4.25262
FLT1P1	0.207336	0.0621522	1.7716	0.0821771	0.843477	-4.25267
FMO11P	0.194544	0.0288068	1.7714	0.0822097	0.843477	-4.25279
RBBP8P1	0.244297	-0.0401269	1.77128	0.082231	0.843477	-4.25287
OR2AJ1	0.193819	-0.0360774	1.77112	0.0822564	0.843477	-4.25296
SEC14L4	0.163338	-0.0228399	1.77045	0.0823695	0.843477	-4.25339
ASTN2-AS1	0.172697	-0.0388245	1.76991	0.0824614	0.843477	-4.25373
TSPY17P	0.17914	-0.00359765	1.76968	0.0825003	0.843477	-4.25387
POU4F2	0.210118	0.0552599	1.7694	0.0825472	0.843477	-4.25405
CCDC12	0.178919	0.0190168	1.76884	0.082642	0.843477	-4.2544
ST6GAL2-IT1	0.212119	-0.0270889	1.76868	0.0826675	0.843477	-4.2545
KCNB1	0.206273	-0.00499721	1.76852	0.0826947	0.843477	-4.2546
TSIX	0.387394	-0.172416	1.76793	0.082795	0.843477	-4.25497
GGA1	0.268851	0.0820647	1.76633	0.0830653	0.843477	-4.25597
DCST2	0.245626	-0.0238551	1.76579	0.0831579	0.843477	-4.25631
NDUFAF4P4	0.222564	0.0229593	1.76525	0.0832485	0.843477	-4.25665
CHST5	0.205492	0.00960514	1.76525	0.0832488	0.843477	-4.25665
ITIH5	0.207457	-0.0619469	1.76523	0.0832518	0.843477	-4.25666
NCCRP1	0.202077	0.0963276	1.7652	0.0832575	0.843477	-4.25668
ANKRD2	0.235938	-0.0284477	1.76452	0.0833737	0.843477	-4.25711
TMEM40	0.190253	-0.0154537	1.76408	0.0834486	0.843477	-4.25739
PHBP7	0.221896	0.134629	1.76404	0.0834546	0.843477	-4.25741
MSX2	0.224611	-0.0118791	1.76394	0.0834712	0.843477	-4.25747
NAGK	0.214777	-0.0150747	1.76392	0.0834757	0.843477	-4.25749
COL6A4P2	0.183112	0.0048481	1.76381	0.0834946	0.843477	-4.25755
HMGB1P15	0.194066	-0.00215574	1.76353	0.0835416	0.843477	-4.25773
TRAV23DV6	0.200531	-0.0269033	1.76322	0.0835947	0.843477	-4.25792
RPGRIP1	0.216684	-0.0165461	1.76313	0.0836099	0.843477	-4.25798
TEX29	0.2257	0.0701762	1.76243	0.0837287	0.843477	-4.25841
PMP2	0.189203	0.0201202	1.7622	0.0837678	0.843477	-4.25856
RPL21P18	0.19559	0.0917581	1.76217	0.0837729	0.843477	-4.25858
LONRF2P1	0.190309	-0.0369542	1.76156	0.0838783	0.843477	-4.25896
FATE1	0.2103	0.00704635	1.76086	0.0839968	0.843477	-4.2594
PSCA	0.207843	0.0431044	1.76031	0.0840913	0.843477	-4.25974
PFN1P3	0.163075	-0.00975621	1.76002	0.0841411	0.843477	-4.25992
ARHGEF19	0.188618	0.0483347	1.75985	0.0841707	0.843477	-4.26003
GALR3	0.205834	0.00490785	1.75942	0.0842446	0.843477	-4.2603
ENTPD7	0.275078	0.0273211	1.75938	0.0842513	0.843477	-4.26033
FCAMR	0.1503	-0.00669344	1.75917	0.0842869	0.843477	-4.26046
TCEAL4P1	0.190017	-0.0253015	1.75903	0.0843106	0.843477	-4.26054
CGB5	0.205179	-0.039148	1.75795	0.0844955	0.843845	-4.26121
HS6ST1	0.223676	0.0153412	1.75763	0.0845516	0.843845	-4.26142
SHISA7	0.255838	-0.0199339	1.75567	0.0848898	0.843845	-4.26264
MGC70870	0.234514	0.0593355	1.75531	0.0849516	0.843845	-4.26287
NUTM2G	0.18997	0.00115533	1.7553	0.0849526	0.843845	-4.26287
PLCB2	0.175844	0.00898556	1.7551	0.0849866	0.843845	-4.26299
IGHV3-63	0.221705	-0.0104197	1.75495	0.0850125	0.843845	-4.26309
ARHGEF38	0.33205	0.0945806	1.75427	0.0851304	0.843845	-4.26351
NRBF2P4	0.236746	0.000593325	1.75411	0.0851585	0.843845	-4.26361
TMCO5A	0.211818	0.0237515	1.75377	0.0852175	0.843845	-4.26383
MBP	0.317622	0.0520769	1.75331	0.0852971	0.843845	-4.26411
ODF1	0.23502	-0.0352211	1.75318	0.0853201	0.843845	-4.26419
CCDC180	0.201441	-0.00928353	1.75318	0.0853202	0.843845	-4.26419
MUC20	0.210341	-0.00825421	1.75315	0.0853244	0.843845	-4.26421
B3GNT6	0.236518	0.00721039	1.75248	0.0854418	0.843845	-4.26463
CLDN10-AS1	0.407608	0.0658903	1.75247	0.0854423	0.843845	-4.26463
C2orf69P1	0.172017	0.0386854	1.75184	0.085552	0.843845	-4.26503
MYL2	0.226764	0.0448056	1.75182	0.0855551	0.843845	-4.26504
TFR2	0.203652	-0.0100454	1.75175	0.085568	0.843845	-4.26508
RLBP1	0.223766	-0.0589966	1.75096	0.0857057	0.844132	-4.26558
FAM74A3	0.190076	-0.0506084	1.75073	0.0857458	0.844132	-4.26572
CASZ1	0.218652	-0.0311016	1.75009	0.0858572	0.844132	-4.26612
ASIC4	0.195357	0.0111669	1.74988	0.0858931	0.844132	-4.26625
PGAM1P11	0.208937	-0.0337031	1.74954	0.0859529	0.844132	-4.26646
BBC3	0.207666	-0.0139724	1.74896	0.0860531	0.844812	-4.26682
RBMX2P1	0.282541	0.0334179	1.74851	0.0861314	0.844902	-4.2671
IGKV1-13	0.24093	-0.0597745	1.74774	0.0862674	0.844902	-4.26758
NOXA1	0.257095	-0.00335578	1.74763	0.0862869	0.844902	-4.26765
TRBV15	0.240486	-0.0114512	1.7474	0.0863271	0.844902	-4.26779
FAM120B	0.261701	0.0599994	1.74686	0.0864209	0.844902	-4.26813
DUX3	0.221098	0.0322941	1.74631	0.0865181	0.844902	-4.26847
GIMAP1-GIMAP5	0.185319	-0.0796884	1.74578	0.0866099	0.844902	-4.26879
ARL13A	0.171301	-0.0320108	1.74568	0.0866272	0.844902	-4.26886
UTS2R	0.193319	0.0950732	1.74476	0.0867889	0.844902	-4.26943
MPND	0.192429	0.037372	1.74463	0.0868128	0.844902	-4.26951
EGFR-AS1	0.207903	0.0178401	1.74414	0.0868987	0.844902	-4.26982
TACR3	0.221013	0.0126372	1.74363	0.0869874	0.844902	-4.27013
C5orf38	0.216979	0.0198933	1.74277	0.0871391	0.844902	-4.27066
ANKRD61	0.219273	-0.0165009	1.74272	0.0871479	0.844902	-4.27069
C19orf84	0.170759	-0.0216941	1.74225	0.0872322	0.844902	-4.27099
RFPL4AP1	0.187484	-0.00384671	1.7422	0.0872403	0.844902	-4.27102
CD300E	0.213546	0.0436661	1.74181	0.0873093	0.844902	-4.27126
C14orf178	0.224232	0.0284367	1.74163	0.0873409	0.844902	-4.27137
TBC1D3P5	0.220991	-0.00735487	1.74043	0.0875532	0.844902	-4.27211
HDAC1P1	0.23329	-0.0372562	1.74018	0.0875975	0.844902	-4.27227
HSPE1P13	0.272115	0.0315446	1.7391	0.0877887	0.844902	-4.27294
PGRMC1	0.279121	0.1031	1.739	0.0878069	0.844902	-4.273
CXCR2P1	0.203519	-0.0262606	1.73771	0.0880352	0.844902	-4.2738
C8orf87	0.223352	-0.0295145	1.73756	0.0880634	0.844902	-4.27389
ADAMTSL3	0.191335	-0.0857015	1.73751	0.0880719	0.844902	-4.27392
MYH7	0.194982	0.0466305	1.7374	0.0880912	0.844902	-4.27399
BAGE5	0.178802	-0.0421796	1.73715	0.0881348	0.844902	-4.27414
KCNA10	0.230622	0.0204574	1.73572	0.0883913	0.844902	-4.27503
UBE2V2P2	0.239728	-0.00429331	1.73544	0.0884413	0.844902	-4.2752
ATP6V1B1	0.22725	-0.00310257	1.73488	0.088541	0.844902	-4.27555
ZNF621	0.214882	0.0519097	1.73481	0.088554	0.844902	-4.27559
NFATC1	0.272962	-0.102549	1.73475	0.0885644	0.844902	-4.27563
IMPG2	0.205584	0.0102431	1.7346	0.088591	0.844902	-4.27572
UQCRHP2	0.200159	0.0676299	1.73453	0.088604	0.844902	-4.27577
EIF4A3P1	0.16489	0.0163466	1.73447	0.0886147	0.844902	-4.2758
RPL13P6	0.229602	0.0246546	1.73364	0.0887623	0.844902	-4.27631
ZNF627	0.206857	-0.0454686	1.73307	0.0888642	0.844902	-4.27666
TRPC7	0.208977	-0.0122698	1.73282	0.0889103	0.844902	-4.27682
HNMT	0.262946	0.0896203	1.73203	0.0890504	0.844902	-4.2773
NDUFB4P8	0.253976	-0.0313683	1.73182	0.0890885	0.844902	-4.27744
MTCO2P21	0.181306	0.00830658	1.73163	0.0891234	0.844902	-4.27756
SNAPC5	0.192002	-0.00991683	1.73152	0.0891424	0.844902	-4.27762
SEC63P1	0.223151	0.010289	1.73149	0.0891477	0.844902	-4.27764
GSTA12P	0.203372	-0.0736792	1.73058	0.0893111	0.844902	-4.2782
C6orf141	0.148122	0.0296639	1.73044	0.089337	0.844902	-4.27829
EDARADD	0.246308	-0.0413731	1.73003	0.0894116	0.844902	-4.27854
SLCO6A1	0.221286	0.116305	1.72998	0.0894194	0.844902	-4.27857
NDUFA5P7	0.266113	0.0220296	1.72958	0.0894912	0.844902	-4.27881
CYP27B1	0.188893	0.0705641	1.72901	0.0895957	0.844902	-4.27917
CRCT1	0.251987	0.0845126	1.72871	0.08965	0.844902	-4.27936
CALM2P1	0.190236	-0.029918	1.72862	0.0896658	0.844902	-4.27941
BIRC6-AS1	0.195115	0.00371949	1.72855	0.0896787	0.844902	-4.27945
C12orf76	0.210481	0.0512357	1.72846	0.0896939	0.844902	-4.27951
ATP6V1B1-AS1	0.211792	0.0138882	1.72807	0.0897648	0.844902	-4.27975
FASTK	0.227376	0.0102821	1.72802	0.0897744	0.844902	-4.27978
GLI1	0.163018	0.00724277	1.728	0.0897769	0.844902	-4.27979
LDHD	0.177968	0.0159596	1.7275	0.0898686	0.844902	-4.2801
PROSER2	0.165842	0.0861493	1.72664	0.0900229	0.844902	-4.28063
FAM71E1	0.19629	-0.0401164	1.7266	0.0900301	0.844902	-4.28065
HNRNPA1P13	0.221009	-0.00677411	1.72658	0.0900337	0.844902	-4.28066
PPP1R32	0.229096	0.0511755	1.72618	0.090107	0.844902	-4.28091
CHCHD3P1	0.199014	-0.00103846	1.72587	0.0901623	0.844902	-4.2811
GSTM3P1	0.170144	-0.0160271	1.72553	0.0902241	0.844902	-4.28131
SIX6	0.193094	0.0649154	1.72538	0.0902522	0.844902	-4.2814
PRDM7	0.197585	0.0164133	1.72501	0.0903201	0.844902	-4.28163
OR4R3P	0.167233	-0.015088	1.72453	0.0904073	0.844902	-4.28193
ROPN1L-AS1	0.23994	0.0231458	1.72442	0.0904263	0.844902	-4.28199
RPS3P6	0.182897	0.0226928	1.72407	0.0904898	0.844902	-4.28221
PTCD2P1	0.234037	-0.00139311	1.72382	0.090536	0.844902	-4.28236
TMEM95	0.224073	0.0231617	1.72375	0.0905484	0.844902	-4.28241
TARS2P1	0.239521	-0.00752784	1.72309	0.0906691	0.844902	-4.28281
PRRX2	0.205403	0.0428455	1.72309	0.0906693	0.844902	-4.28281
CCDC107	0.221078	-0.0484965	1.72308	0.0906701	0.844902	-4.28282
CRYBB2	0.171905	0.0144756	1.72276	0.0907289	0.844902	-4.28301
S100A7A	0.252562	0.152796	1.72182	0.0909013	0.844902	-4.28359
RAB9B	0.195895	0.0260271	1.72179	0.0909055	0.844902	-4.28361
GNRH2	0.249082	0.0523551	1.72173	0.0909167	0.844902	-4.28365
MASP2	0.203985	-0.00916016	1.72117	0.0910198	0.844902	-4.28399
STPG2	0.194498	0.00120975	1.72106	0.0910397	0.844902	-4.28406
SETP12	0.196752	-0.0294152	1.7206	0.0911228	0.844902	-4.28434
USP28	0.154847	0.0034591	1.72	0.0912337	0.844902	-4.28471
FAM91A3P	0.345814	0.0555457	1.71944	0.0913359	0.844902	-4.28505
C1QL4	0.20813	0.0324553	1.719	0.0914163	0.844902	-4.28532
C1orf229	0.224834	0.0508487	1.71888	0.0914393	0.844902	-4.2854
IGHV3-57	0.20795	0.0235928	1.71884	0.0914456	0.844902	-4.28542
SDCBPP3	0.226118	-0.0395026	1.71849	0.0915101	0.844902	-4.28563
PTPRT	0.224166	-0.0613911	1.71755	0.091684	0.844902	-4.28621
HMGN1P2	0.188301	0.0165469	1.71753	0.0916878	0.844902	-4.28623
CLIC1P1	0.163057	0.0245984	1.71669	0.0918406	0.844902	-4.28673
PDX1	0.214539	0.0791145	1.71669	0.0918415	0.844902	-4.28674
SPDYE4	0.189607	0.0127931	1.71652	0.0918731	0.844902	-4.28684
NUCB1-AS1	0.138642	0.0161777	1.7165	0.0918758	0.844902	-4.28685
RNF126	0.221863	-0.0108585	1.71647	0.0918829	0.844902	-4.28687
TRIM16L	0.172106	0.0169622	1.71638	0.0918984	0.844902	-4.28693
CYP4F11	0.213234	-0.0319451	1.71578	0.0920089	0.844902	-4.28729
STX6	0.271983	0.0230355	1.71572	0.0920207	0.844902	-4.28733
FLOT1	0.23455	-0.0249227	1.71569	0.0920262	0.844902	-4.28735
UCKL1-AS1	0.210198	0.0149685	1.71502	0.0921493	0.844902	-4.28776
SLC35C1	0.259703	-0.0138742	1.71391	0.0923545	0.844902	-4.28844
RAVER1	0.189614	0.0513071	1.71377	0.0923802	0.844902	-4.28852
CYP4F29P	0.244091	0.0444735	1.713	0.0925226	0.844902	-4.28899
TXNP5	0.201483	0.132444	1.7127	0.0925782	0.844902	-4.28918
SLAMF1	0.200477	-0.0870474	1.71258	0.092601	0.844902	-4.28925
VN1R11P	0.152053	0.0148853	1.71226	0.0926605	0.844902	-4.28945
CCDC181	0.182211	-0.0327642	1.71182	0.0927418	0.844902	-4.28971
DUX4L9	0.240218	0.00265579	1.71149	0.0928028	0.844902	-4.28991
IFNA20P	0.183621	-0.0547895	1.71084	0.0929249	0.844902	-4.29032
HNRNPA1P38	0.176562	0.0432128	1.71065	0.0929589	0.844902	-4.29043
SLC2A7	0.199157	0.0432055	1.71045	0.0929963	0.844902	-4.29055
CCT5P1	0.186423	0.0490957	1.70977	0.0931232	0.844902	-4.29097
AQP8	0.198751	-0.0487506	1.70955	0.093165	0.844902	-4.2911
HSBP1P2	0.256046	-0.00700959	1.70866	0.0933313	0.844902	-4.29165
SAR1AP4	0.186795	0.0380498	1.7082	0.0934175	0.844902	-4.29193
HIP1R	0.176973	-0.0378313	1.70807	0.0934412	0.844902	-4.29201
USP9YP35	0.214199	0.0174695	1.70795	0.0934632	0.844902	-4.29208
FRG2FP	0.213134	-0.0142235	1.70792	0.0934687	0.844902	-4.2921
UNCX	0.18871	0.00431889	1.70786	0.0934793	0.844902	-4.29213
BSN-AS1	0.147126	-0.0179532	1.70741	0.0935634	0.844902	-4.2924
KRT18P9	0.18898	0.0243115	1.70737	0.093572	0.844902	-4.29243
AGK	0.230304	0.0373344	1.70728	0.0935885	0.844902	-4.29249
TEK	0.198706	-0.0194738	1.70722	0.0935999	0.844902	-4.29252
AK3P3	0.18871	-0.0180489	1.70715	0.0936128	0.844902	-4.29257
HSPE1P19	0.206068	-0.0276772	1.70695	0.0936497	0.844902	-4.29269
TRPM5	0.200531	0.0244862	1.70657	0.0937208	0.844902	-4.29292
EGFLAM-AS4	0.175516	-0.0848926	1.70584	0.0938591	0.844902	-4.29337
PLEKHM3	0.264223	0.03598	1.7054	0.0939405	0.844902	-4.29363
MRPL57P1	0.184659	0.014727	1.7053	0.0939604	0.844902	-4.2937
BMP10	0.2337	0.0573835	1.70502	0.0940129	0.844902	-4.29387
TRIM60P10Y	0.191452	-0.0266924	1.7046	0.0940921	0.844902	-4.29412
THEMIS3P	0.17347	-0.0217067	1.70401	0.0942028	0.844902	-4.29448
UBE2DNL	0.18576	0.0134182	1.70353	0.0942932	0.844902	-4.29477
TMEM256P1	0.175866	-0.0406314	1.70319	0.0943564	0.844902	-4.29498
ARMC5	0.223345	0.0914078	1.70288	0.0944155	0.844902	-4.29517
TIMELESS	0.212962	-0.0261241	1.70265	0.0944588	0.844902	-4.29531
ZNF544	0.213979	-0.00945464	1.70247	0.094492	0.844902	-4.29541
ZNF277	0.175693	0.0266297	1.70223	0.0945379	0.844902	-4.29556
BCORL1	0.264045	0.0630926	1.70222	0.0945389	0.844902	-4.29557
RNF5	0.172677	-0.0252743	1.70184	0.0946112	0.844902	-4.2958
OR52K1	0.222458	-0.0133481	1.70178	0.0946227	0.844902	-4.29584
FBXO33	0.202493	-0.0457905	1.70035	0.0948933	0.844902	-4.29671
SLC34A1	0.231358	0.0590152	1.69962	0.0950318	0.844902	-4.29715
RPSAP62	0.229036	0.0224863	1.69956	0.0950426	0.844902	-4.29719
HNRNPA1P4	0.20781	0.0570059	1.69945	0.0950628	0.844902	-4.29725
PLEKHG4	0.3289	0.159992	1.6993	0.0950916	0.844902	-4.29734
OR5AM1P	0.167962	0.039613	1.69862	0.0952203	0.844902	-4.29775
FADS3	0.202793	-0.021041	1.69835	0.0952726	0.844902	-4.29792
GPR4	0.249235	-0.0162225	1.69809	0.0953219	0.844902	-4.29808
WDR93	0.189154	-0.0091502	1.69803	0.0953321	0.844902	-4.29811
PID1	0.242555	0.0351691	1.69756	0.0954222	0.844902	-4.2984
RAP2CP1	0.171485	0.00253679	1.69745	0.0954434	0.844902	-4.29847
NMRAL1	0.230475	0.0557169	1.69743	0.0954458	0.844902	-4.29847
KRT8P30	0.172587	-0.0369164	1.69714	0.0955021	0.844902	-4.29865
SMARCE1P4	0.197396	-0.0166698	1.69515	0.0958814	0.844902	-4.29986
FAM83A	0.210869	-0.00153845	1.69485	0.0959383	0.844902	-4.30004
MIEF2	0.171437	-0.01996	1.69412	0.096077	0.844902	-4.30048
FOXP1-IT1	0.178227	-0.0423447	1.6938	0.0961383	0.844902	-4.30068
MPPED2	0.228801	-0.0470671	1.6938	0.096139	0.844902	-4.30068
ADAM1B	0.17272	-0.0620083	1.6937	0.0961581	0.844902	-4.30074
UNC13C	0.194499	-0.0429532	1.69177	0.0965286	0.844902	-4.30191
SALL4P6	0.204487	-0.0458488	1.69137	0.0966057	0.844902	-4.30215
HCN3	0.183548	0.0436523	1.69126	0.0966251	0.844902	-4.30221
LAMC1	0.198072	-0.00134232	1.69119	0.09664	0.844902	-4.30226
ASPG	0.156076	0.0488415	1.69083	0.0967082	0.844902	-4.30247
TMEM177	0.173793	-0.00734284	1.69082	0.0967096	0.844902	-4.30248
GOLGA3	0.190739	0.0111297	1.69	0.096868	0.844902	-4.30298
CACNB3	0.194327	0.00746827	1.68902	0.0970565	0.844902	-4.30357
RPL23AP44	0.234042	-0.0247323	1.68897	0.0970673	0.844902	-4.3036
ZRANB3	0.199218	-0.00941877	1.68803	0.0972484	0.844902	-4.30417
P2RX6P	0.189321	0.0279082	1.68781	0.0972913	0.844902	-4.3043
RNFT1	0.195173	-0.0049905	1.68774	0.0973045	0.844902	-4.30434
PRPH2	0.187284	0.0481603	1.68743	0.0973647	0.844902	-4.30453
CAPN9	0.222275	0.0210456	1.68722	0.0974045	0.844902	-4.30466
CDC42SE2	0.325854	-0.24441	1.68658	0.0975277	0.844902	-4.30504
LRRC37BP1	0.232155	-0.0153817	1.68638	0.0975679	0.844902	-4.30517
MZT2A	0.159457	0.0605359	1.68637	0.0975687	0.844902	-4.30517
KCNJ1	0.171187	-0.0605541	1.68551	0.0977353	0.844902	-4.30569
CKB	0.343511	0.0463548	1.6854	0.0977567	0.844902	-4.30575
CACNG6	0.16443	-0.000684234	1.68536	0.0977652	0.844902	-4.30578
DHRS4L2	0.151847	-0.0146108	1.68502	0.0978309	0.844902	-4.30598
WFDC8	0.282268	0.11254	1.68409	0.0980114	0.844902	-4.30654
TPPP3	0.218431	0.00302886	1.68373	0.0980809	0.844902	-4.30676
PPFIBP2	0.231453	0.040521	1.68372	0.0980835	0.844902	-4.30677
BOD1P1	0.181111	0.0128763	1.68256	0.0983093	0.844902	-4.30747
TMEM59L	0.148971	0.00545992	1.68252	0.098316	0.844902	-4.30749
GPR75	0.239427	0.0831575	1.68228	0.0983632	0.844902	-4.30763
SYCP3	0.199677	-0.00790304	1.68196	0.0984267	0.844902	-4.30783
CFAP43	0.202642	0.0177561	1.68152	0.0985128	0.844902	-4.30809
OR10A4	0.254312	0.0110226	1.68128	0.0985583	0.844902	-4.30824
OR7M1P	0.248205	-0.0259439	1.68027	0.0987566	0.844902	-4.30885
ARID3A	0.178543	-0.000979892	1.67995	0.0988188	0.844902	-4.30904
TXNP4	0.208159	0.0352788	1.67991	0.0988271	0.844902	-4.30906
MYO3A	0.183835	-0.0224113	1.67984	0.0988409	0.844902	-4.30911
COL22A1	0.214376	0.0190881	1.67969	0.0988698	0.844902	-4.30919
ULBP3	0.205486	0.073151	1.67915	0.0989754	0.844902	-4.30952
CTSG	0.179791	-0.0598884	1.67901	0.0990027	0.844902	-4.3096
TTBK1	0.179317	-0.022471	1.679	0.0990041	0.844902	-4.30961
ZNF691	0.202338	0.0177438	1.67896	0.0990126	0.844902	-4.30963
HAS2	0.259001	-0.109076	1.67862	0.0990792	0.844902	-4.30984
HNRNPA1L2	0.250567	0.090816	1.67846	0.0991113	0.844902	-4.30993
CHCHD2P3	0.226845	0.0229303	1.67775	0.0992492	0.844902	-4.31036
CD1C	0.20541	-0.0697844	1.67755	0.0992901	0.844902	-4.31048
OR13C1P	0.193938	0.0554444	1.67746	0.0993076	0.844902	-4.31054
HIF1AP1	0.155159	-0.0677396	1.67702	0.0993925	0.844902	-4.3108
YY1P1	0.221097	0.0496833	1.67695	0.0994077	0.844902	-4.31084
NPAP1P4	0.228164	-0.0430633	1.6769	0.0994163	0.844902	-4.31087
USP17L19	0.201142	0.0141033	1.67634	0.099528	0.844902	-4.31121
SERTAD3	0.238846	0.00815291	1.67616	0.0995628	0.844902	-4.31132
RPS6P20	0.177352	-0.0587109	1.6761	0.0995744	0.844902	-4.31135
OR2C1	0.174521	0.00751057	1.67606	0.099582	0.844902	-4.31137
IGHV1OR16-1	0.225174	0.0501663	1.67603	0.0995875	0.844902	-4.31139
MRPL57P7	0.229238	0.0104025	1.67589	0.0996155	0.844902	-4.31148
PPA2	0.18432	0.0531823	1.67522	0.099748	0.844902	-4.31188
RPL31P47	0.178159	-0.055669	1.6752	0.0997525	0.844902	-4.31189
B4GALT6	0.162541	0.0172219	1.67481	0.0998288	0.844902	-4.31213
ANKMY1	0.189272	0.0476734	1.67462	0.0998668	0.844902	-4.31224
SIGMAR1	0.158205	0.0684657	1.67449	0.0998912	0.844902	-4.31231
FFAR4	0.256601	0.000519723	1.67432	0.0999252	0.844902	-4.31242
LEMD1	0.389171	0.0505906	1.67419	0.0999502	0.844902	-4.31249
ABCC12	0.183586	0.00744995	1.6741	0.0999687	0.844902	-4.31255
MBLAC2	0.223782	0.0322955	1.67406	0.0999776	0.844902	-4.31258
PSMD10	0.276215	0.0840102	1.6739	0.100008	0.844902	-4.31267
ANKRD65	0.22509	0.0310889	1.67317	0.100154	0.844902	-4.31311
PRKAG3	0.163996	0.028354	1.67288	0.10021	0.844902	-4.31328
THEG5	0.188512	0.0342755	1.67281	0.100224	0.844902	-4.31332
RIBC2	0.22605	0.0620916	1.67255	0.100275	0.844902	-4.31348
ZNF705CP	0.219509	-0.00131774	1.67242	0.100302	0.844902	-4.31356
RPL7P35	0.178108	0.0331932	1.67241	0.100304	0.844902	-4.31357
RPS28P8	0.174729	0.0398007	1.67207	0.100371	0.844902	-4.31377
SIX5	0.215248	-0.0125653	1.67156	0.100471	0.844902	-4.31407
SRRM2-AS1	0.165646	0.0265635	1.67146	0.100491	0.844902	-4.31413
NEFL	0.241773	-0.0134087	1.67067	0.100648	0.844902	-4.3146
DAPK1	0.161027	-0.0150999	1.67064	0.100654	0.844902	-4.31462
FAM166A	0.241832	-0.0123533	1.67003	0.100775	0.844902	-4.31499
TNNT2	0.185859	-0.0242927	1.66982	0.100817	0.844902	-4.31511
NKD1	0.336869	0.184413	1.66967	0.100847	0.844902	-4.31521
IKZF1	0.287883	-0.0181739	1.6695	0.100881	0.844902	-4.31531
PLPP2	0.347604	0.191801	1.66929	0.100924	0.844902	-4.31543
LRRK2	0.235604	-0.0488773	1.66924	0.100933	0.844902	-4.31546
RTEL1	0.164997	0.0399851	1.66911	0.100958	0.844902	-4.31554
ENPP7P1	0.177006	-0.00265326	1.66897	0.100987	0.844902	-4.31562
IGSF9	0.212161	0.0150155	1.66854	0.101072	0.844902	-4.31588
PLCXD3	0.217339	-0.0330759	1.66822	0.101137	0.844902	-4.31607
POU6F2-AS2	0.183595	-0.0657017	1.66781	0.101217	0.844902	-4.31631
RBMY1J	0.186015	-0.0266705	1.66722	0.101335	0.844902	-4.31667
TNNI2	0.223098	0.0442	1.6671	0.101361	0.844902	-4.31674
SH3BP5	0.225447	0.0575771	1.66703	0.101374	0.844902	-4.31678
TBC1D2	0.20773	0.0387348	1.66589	0.101601	0.844902	-4.31746
CDAN1	0.167235	-0.037387	1.66534	0.101713	0.844966	-4.3178
MFSD13A	0.195643	0.0376635	1.6651	0.10176	0.844966	-4.31794
ZBTB48	0.217993	-0.00616271	1.66438	0.101905	0.844966	-4.31837
ABHD17AP7	0.179189	0.0253961	1.66427	0.101926	0.844966	-4.31843
CYP51A1P3	0.176479	0.0430383	1.66417	0.101946	0.844966	-4.31849
NCOR2	0.200925	0.0327629	1.6624	0.102303	0.846861	-4.31955
SLC25A53	0.275833	-0.0116247	1.66211	0.10236	0.846861	-4.31972
ADNP-AS1	0.243737	0.037292	1.66185	0.102412	0.847034	-4.31987
NR1H3	0.155765	0.0125918	1.66016	0.102753	0.847093	-4.32088
ACTR5	0.232342	0.0770841	1.6601	0.102766	0.847093	-4.32092
APOM	0.170968	-0.0369941	1.65969	0.102848	0.847093	-4.32116
VWC2L-IT1	0.192537	0.0549287	1.6593	0.102928	0.847093	-4.3214
PFN1P4	0.194001	-0.0298975	1.65928	0.102932	0.847093	-4.32141
EXOC3L2	0.157868	-0.0300933	1.65865	0.103059	0.847093	-4.32178
RPS10P21	0.163595	0.012651	1.65865	0.103059	0.847093	-4.32178
PYGM	0.19045	-0.102086	1.65857	0.103075	0.847093	-4.32183
MARK2P13	0.174525	-0.0130359	1.65808	0.103175	0.847093	-4.32212
OR10H3	0.223529	0.0445076	1.65777	0.103237	0.847093	-4.3223
SPCS2P1	0.220584	-0.000579266	1.65765	0.103262	0.847093	-4.32238
PIN1	0.182053	-0.044944	1.65752	0.103289	0.847093	-4.32245
HNRNPKP1	0.208405	0.0463234	1.65731	0.103332	0.847093	-4.32258
C1orf35	0.173361	0.0417778	1.65688	0.103419	0.847093	-4.32284
C1QTNF7	0.184701	0.0594704	1.65637	0.103522	0.847093	-4.32314
MTND6P4	0.158986	-0.0274627	1.65606	0.103584	0.847093	-4.32332
SELENBP1	0.367187	-0.0252546	1.656	0.103597	0.847093	-4.32336
ZNF71	0.180241	0.0806381	1.65591	0.103615	0.847093	-4.32341
ARL2	0.220815	-0.00271541	1.65576	0.103646	0.847093	-4.3235
SH3GL1P2	0.201124	0.00374984	1.65557	0.103685	0.847093	-4.32361
KCTD17	0.253137	0.0116801	1.65458	0.103886	0.847093	-4.3242
POM121L14P	0.244023	0.0666646	1.65428	0.103948	0.847093	-4.32438
FUZ	0.192325	0.0160381	1.65313	0.104182	0.847093	-4.32506
TAL1	0.226348	-0.0569882	1.65304	0.1042	0.847093	-4.32511
TRMT1	0.273975	0.0634417	1.65271	0.104269	0.847093	-4.32531
CEACAMP10	0.199461	0.0170168	1.65254	0.104303	0.847093	-4.32541
TTTY2	0.187547	0.0155297	1.65249	0.104314	0.847093	-4.32544
OR52I2	0.19249	-0.0258258	1.65093	0.104632	0.847093	-4.32636
MTCO1P51	0.186078	-0.0169892	1.6509	0.104639	0.847093	-4.32639
ABT1	0.200783	0.0243779	1.65061	0.104698	0.847093	-4.32655
VLDLR-AS1	0.210357	-0.0112493	1.65054	0.104713	0.847093	-4.3266
MID1IP1-AS1	0.188996	-0.0422679	1.65048	0.104724	0.847093	-4.32663
SERPINA3	0.213714	-0.0687888	1.65004	0.104814	0.847093	-4.32689
FLG2	0.183982	0.015086	1.6484	0.105152	0.847093	-4.32786
IGHV3-19	0.193936	-0.00289221	1.64836	0.10516	0.847093	-4.32789
KCNK4	0.198451	0.011655	1.64834	0.105165	0.847093	-4.3279
ANKRD36P1	0.194023	0.0363407	1.64828	0.105178	0.847093	-4.32794
SPANXB1	0.249825	-0.0134289	1.64799	0.105237	0.847093	-4.32811
ZNF599	0.178765	-0.00545429	1.64732	0.105376	0.847093	-4.32851
SLC25A28	0.204449	0.0136103	1.64701	0.105438	0.847093	-4.32869
DUX4L47	0.208757	0.0466057	1.64686	0.105469	0.847093	-4.32877
HMGN1P26	0.256138	-0.0203065	1.64631	0.105583	0.847093	-4.3291
ACADS	0.229874	-0.0688971	1.64622	0.105603	0.847093	-4.32916
CDH10	0.161891	-0.00572319	1.64614	0.105618	0.847093	-4.3292
RPL31P52	0.170015	-0.0497922	1.64561	0.105727	0.847093	-4.32951
HMGXB3	0.199802	0.106975	1.64554	0.105743	0.847093	-4.32956
TAS1R2	0.216102	0.0257282	1.64542	0.105767	0.847093	-4.32963
IFNL4	0.212348	0.0802342	1.64531	0.10579	0.847093	-4.32969
RAB40B	0.189486	0.0566326	1.64498	0.105859	0.847093	-4.32989
BSNDP3	0.178085	-0.0052838	1.64477	0.105902	0.847093	-4.33001
KCNG4	0.216088	0.0371509	1.64463	0.105931	0.847093	-4.33009
FBXL16	0.213213	0.0474478	1.64447	0.105964	0.847093	-4.33019
PART1	0.1907	0.0375992	1.64426	0.106008	0.847093	-4.33031
FHOD3	0.262341	-0.134212	1.64423	0.106014	0.847093	-4.33033
POTEH-AS1	0.203948	-0.0121607	1.64413	0.106033	0.847093	-4.33039
TRBV1	0.195755	0.0671973	1.64387	0.106089	0.847093	-4.33055
SDE2	0.193652	0.003075	1.64372	0.106119	0.847093	-4.33063
KCNJ5	0.208962	-0.0498487	1.6428	0.10631	0.847093	-4.33117
GPR17	0.200165	0.00914525	1.64267	0.106338	0.847093	-4.33125
STAT4	0.198371	-0.0284276	1.64235	0.106403	0.847093	-4.33144
OR2AO1P	0.159148	-0.0614587	1.64235	0.106405	0.847093	-4.33144
OR5AK4P	0.148119	-0.0435234	1.64117	0.10665	0.847357	-4.33214
TRIM35	0.19257	0.0688635	1.64117	0.10665	0.847357	-4.33214
PSD	0.215509	0.0568423	1.63983	0.10693	0.848049	-4.33293
IL17D	0.217862	0.0344865	1.63968	0.10696	0.848049	-4.33301
PYM1	0.194084	-0.0151582	1.63961	0.106975	0.848049	-4.33306
SLC45A2	0.229009	-0.0338859	1.63943	0.107011	0.848049	-4.33316
HMGN2P18	0.202571	-0.0612981	1.63939	0.107022	0.848049	-4.33319
OR5B19P	0.201746	0.0302551	1.6393	0.107039	0.848049	-4.33324
ARHGEF4	0.187964	-0.0505095	1.63864	0.107177	0.848404	-4.33363
IGHVII-15-1	0.192449	0.0174637	1.63821	0.107268	0.848879	-4.33388
CSF2	0.141361	0.0132289	1.63741	0.107436	0.849123	-4.33436
SKP1P1	0.26964	0.0172663	1.63713	0.107493	0.849123	-4.33452
HERC2P8	0.204215	0.0502928	1.63687	0.107548	0.849123	-4.33467
NPHP3-AS1	0.226699	0.00291172	1.63652	0.107621	0.849207	-4.33488
LSP1P1	0.198349	-0.0568007	1.63638	0.107652	0.849207	-4.33496
GRIN2A	0.186853	-0.0714947	1.63585	0.107763	0.849349	-4.33527
TUBG1	0.213903	0.0439218	1.63554	0.107826	0.849372	-4.33545
FBXL15	0.211375	-0.0180845	1.63498	0.107945	0.849372	-4.33578
EPN1	0.169928	0.0194697	1.63492	0.107958	0.849372	-4.33582
C15orf62	0.201689	0.0160132	1.63416	0.108119	0.8494	-4.33627
RBM15	0.155306	0.0329911	1.63367	0.108221	0.8494	-4.33655
TNFRSF14	0.231781	-0.0250633	1.63362	0.108231	0.8494	-4.33658
ZNF764	0.131825	-0.0116476	1.63332	0.108295	0.849517	-4.33676
IGHVII-22-1	0.170298	-0.0267847	1.63305	0.108352	0.849517	-4.33692
HIGD1C	0.189066	0.0233897	1.63298	0.108367	0.849517	-4.33696
C19orf67	0.1673	0.0146539	1.63294	0.108375	0.849517	-4.33698
OR5BN1P	0.175383	-0.0081832	1.63213	0.108546	0.849693	-4.33746
MTND6P15	0.178994	-0.0351348	1.63081	0.108824	0.850203	-4.33823
SLC25A1P4	0.197488	0.107111	1.63044	0.108904	0.850203	-4.33845
ME3	0.169257	0.0175198	1.6299	0.109018	0.850203	-4.33876
PRSS56	0.231598	-0.018929	1.62969	0.109062	0.850203	-4.33889
C5orf52	0.227174	0.0110653	1.62966	0.109069	0.850203	-4.33891
PRC1-AS1	0.240215	0.0605287	1.6293	0.109146	0.850203	-4.33912
EHHADH-AS1	0.233237	0.0682395	1.62858	0.109297	0.850203	-4.33954
UBE2V2P3	0.167546	0.0650329	1.62825	0.109368	0.850203	-4.33973
AMY1B	0.166593	-0.108763	1.62798	0.109426	0.850203	-4.33989
NRARP	0.217095	0.05986	1.6278	0.109463	0.850203	-4.33999
KRTAP9-6	0.210678	0.0431938	1.62766	0.109494	0.850203	-4.34008
PPP1R13B	0.205553	0.0831035	1.62753	0.109522	0.850203	-4.34016
GYPE	0.165651	-0.0427579	1.62696	0.109643	0.850852	-4.34049
MPP5	0.219519	-0.00759793	1.62656	0.109727	0.850852	-4.34072
DVL2	0.179187	0.0250164	1.62548	0.109959	0.850852	-4.34136
RBMY2YP	0.171235	-0.0130522	1.62535	0.109986	0.850852	-4.34143
HAUS3	0.227662	0.0348686	1.62489	0.110085	0.850852	-4.3417
PRM2	0.210472	0.00445221	1.62407	0.11026	0.850852	-4.34218
C1orf74	0.190923	0.00352381	1.62403	0.110268	0.850852	-4.3422
TDRD10	0.17835	-0.0111066	1.62375	0.110328	0.850852	-4.34236
WDR74	0.207174	0.117228	1.62358	0.110366	0.850852	-4.34247
EYA2	0.204453	-0.0909992	1.62335	0.110414	0.850852	-4.3426
GOT2P5	0.203139	-0.0228906	1.62323	0.110439	0.850852	-4.34267
HCG4P11	0.183468	-0.0260979	1.62314	0.110459	0.850852	-4.34272
SMAD7	0.277337	-0.0950014	1.62294	0.110503	0.850852	-4.34284
SIGLEC29P	0.211132	0.017867	1.62205	0.110693	0.851306	-4.34336
C1QBPP1	0.169502	0.0294309	1.6212	0.110876	0.852276	-4.34386
PIGC	0.233034	-0.00423941	1.62073	0.110977	0.852442	-4.34413
NKAPL	0.223474	-0.0035659	1.62049	0.111028	0.852442	-4.34427
HOMER3	0.209081	0.00932177	1.62041	0.111045	0.852442	-4.34432
EPS15L1	0.166741	-0.0151475	1.61954	0.111233	0.852532	-4.34483
UBTFL3	0.169253	-0.0232018	1.61925	0.111294	0.852532	-4.34499
FOXG1	0.204325	-0.0157629	1.61889	0.111373	0.852532	-4.3452
RLN3	0.14262	-0.0274615	1.61783	0.111602	0.852532	-4.34582
DNAJB7	0.222094	0.0249269	1.61686	0.11181	0.852532	-4.34638
SIX2	0.1867	0.0122645	1.61643	0.111904	0.852532	-4.34663
MYH3	0.193714	0.00716185	1.61612	0.111972	0.852532	-4.34682
RPL10AP1	0.153574	0.020817	1.61606	0.111984	0.852532	-4.34685
MAP2K7	0.249098	0.0990848	1.61597	0.112004	0.852532	-4.3469
CNN2P10	0.193656	0.0419992	1.61494	0.112228	0.852532	-4.34751
CENPI	0.199713	0.041207	1.61484	0.112249	0.852532	-4.34756
FTLP10	0.200916	0.0144425	1.61465	0.11229	0.852532	-4.34767
AZU1P1	0.159979	0.0357907	1.61366	0.112505	0.853348	-4.34825
OR11Q1P	0.203309	0.0241013	1.61329	0.112587	0.853348	-4.34847
SLC12A7	0.202155	0.00440962	1.61277	0.1127	0.853348	-4.34877
GPR82	0.166039	-0.00238409	1.61251	0.112756	0.853348	-4.34892
RPL12P36	0.198346	0.00392175	1.61231	0.112799	0.853348	-4.34903
DNAAF5	0.222857	0.166025	1.61211	0.112844	0.853348	-4.34915
PRMT9	0.189578	0.0506152	1.61179	0.112914	0.853348	-4.34934
AMER3	0.188978	0.026185	1.61105	0.113074	0.853348	-4.34976
MRPL9P1	0.186461	-0.00432907	1.6107	0.11315	0.853348	-4.34997
PRSS58	0.241526	0.0542309	1.61066	0.113159	0.853348	-4.34999
IGKV3-34	0.193955	0.0133306	1.61064	0.113163	0.853348	-4.35
RBMY2HP	0.174924	-0.0290655	1.61036	0.113225	0.853348	-4.35016
LCMT1-AS2	0.175191	0.0424537	1.60989	0.113328	0.853348	-4.35044
FOXH1	0.203751	0.0114549	1.60945	0.113425	0.853348	-4.35069
IGHMBP2	0.156325	0.00113578	1.60936	0.113444	0.853348	-4.35075
TCF15	0.134508	0.0492259	1.60922	0.113475	0.853348	-4.35083
SNCA	0.181414	-0.00543606	1.60911	0.1135	0.853348	-4.35089
SLC1A6	0.149245	0.0483824	1.60896	0.113531	0.853348	-4.35098
TNFAIP8L1	0.159784	0.00211886	1.60892	0.113541	0.853348	-4.351
RPL23AP7	0.128771	0.0314138	1.60865	0.113599	0.853348	-4.35115
HMGB1P28	0.20601	0.0188812	1.60814	0.113712	0.853348	-4.35145
SSU72P2	0.223431	0.00592356	1.60795	0.113752	0.853348	-4.35156
F11-AS1	0.227081	0.0383044	1.60724	0.113908	0.853497	-4.35197
PHKG1P4	0.148355	0.0385074	1.60717	0.113925	0.853497	-4.35202
LRAT	0.168418	0.00348854	1.60697	0.113968	0.853497	-4.35213
CYP51A1-AS1	0.216594	0.0772718	1.60656	0.114058	0.853497	-4.35237
OR52Z1	0.185767	-0.0128113	1.60613	0.114153	0.853497	-4.35262
NUDT22	0.178358	0.00467057	1.605	0.114403	0.853497	-4.35327
RPL15P4	0.197544	0.0129567	1.60426	0.114565	0.853497	-4.3537
TRIM31-AS1	0.189055	0.0100176	1.60383	0.114661	0.853497	-4.35395
COL6A6	0.19511	-0.0996682	1.60377	0.114673	0.853497	-4.35398
KRT87P	0.161867	0.0374093	1.60339	0.114757	0.853497	-4.3542
S100A7L2	0.192802	-0.0212737	1.60338	0.114759	0.853497	-4.35421
POU3F4	0.242647	0.0215825	1.60305	0.114834	0.853497	-4.3544
FAM117A	0.187802	-0.00213887	1.60286	0.114876	0.853497	-4.35451
TFPT	0.160938	0.0207264	1.60275	0.114898	0.853497	-4.35457
SNAR-A12	0.309264	0.210774	1.60254	0.114945	0.853497	-4.35469
CORO7	0.196255	0.0770492	1.60199	0.115068	0.853497	-4.35502
ABALON	0.246364	0.0648057	1.60184	0.1151	0.853497	-4.3551
CYTH4	0.218493	-0.0445326	1.60175	0.115121	0.853497	-4.35515
MED28P7	0.187654	-0.0267279	1.60174	0.115122	0.853497	-4.35515
RUNDC1	0.197158	0.000759984	1.60167	0.115138	0.853497	-4.3552
HSBP1	0.259963	0.169235	1.60079	0.115334	0.853497	-4.35571
UAP1L1	0.150025	-0.00195674	1.60061	0.115374	0.853497	-4.35581
ADGRA1-AS1	0.151875	-0.00535962	1.59985	0.115541	0.853497	-4.35625
SLC22A9	0.170015	0.0267055	1.59964	0.115588	0.853497	-4.35637
GGT7	0.241387	0.102779	1.59955	0.115608	0.853497	-4.35642
FRG2DP	0.186598	0.000527055	1.59943	0.115636	0.853497	-4.35649
DHRS12	0.269387	0.117256	1.59923	0.11568	0.853497	-4.35661
OXT	0.180083	0.0034693	1.59903	0.115726	0.853497	-4.35672
SYCE1L	0.201647	0.00408918	1.59882	0.11577	0.853497	-4.35684
PDE6D	0.131344	0.00392196	1.59882	0.115772	0.853497	-4.35684
SPOCD1	0.194657	0.0905832	1.59868	0.115802	0.853497	-4.35692
TRGV1	0.176797	0.0200788	1.59859	0.115823	0.853497	-4.35698
ARID5A	0.190625	-0.031907	1.59708	0.116158	0.855042	-4.35784
TSC2	0.213355	0.0087223	1.59644	0.116303	0.855236	-4.35822
F9	0.273489	0.0176163	1.59623	0.116348	0.855236	-4.35833
MOGAT2	0.207088	-0.0641468	1.596	0.1164	0.855236	-4.35847
RIMKLA	0.190329	0.00712108	1.59545	0.116523	0.855418	-4.35878
EDA2R	0.187604	0.0456435	1.59526	0.116565	0.855502	-4.35889
LPXN	0.206033	0.0448075	1.59434	0.116773	0.856343	-4.35943
GLTPP1	0.145623	-0.0462003	1.59335	0.116995	0.856343	-4.36
DPRXP5	0.1525	-0.0095715	1.59324	0.117019	0.856343	-4.36006
GDF10	0.242583	0.0381798	1.59282	0.117114	0.856357	-4.3603
ACTRT1	0.253639	0.00240932	1.59279	0.117121	0.856357	-4.36032
PCSK1N	0.151695	0.0561606	1.59232	0.117226	0.856546	-4.36059
OR8B5P	0.167446	-0.00944259	1.59225	0.117241	0.856546	-4.36063
MC1R	0.161959	-0.0267962	1.58962	0.117834	0.858827	-4.36214
HSD11B2	0.282627	-0.0358387	1.58961	0.117836	0.858827	-4.36214
KIAA0319	0.197739	-0.0529467	1.58772	0.118264	0.859509	-4.36323
SNAR-A3	0.381023	0.276241	1.58723	0.118374	0.859509	-4.36351
SNAR-A5	0.381023	0.276241	1.58723	0.118374	0.859509	-4.36351
SNAR-A7	0.381023	0.276241	1.58723	0.118374	0.859509	-4.36351
SNAR-A4	0.381023	0.276241	1.58723	0.118374	0.859509	-4.36351
SNAR-A6	0.381023	0.276241	1.58723	0.118374	0.859509	-4.36351
SNAR-A8	0.381023	0.276241	1.58723	0.118374	0.859509	-4.36351
CDY1B	0.204232	0.00741994	1.587	0.118427	0.859509	-4.36364
TRIP4	0.21394	-0.0393899	1.58602	0.118649	0.85986	-4.3642
RAB32	0.21488	-0.0212883	1.58573	0.118715	0.85986	-4.36437
TRAV15	0.192211	-0.0114191	1.58566	0.11873	0.85986	-4.36441
TLR12P	0.231646	-0.0180751	1.58551	0.118765	0.85986	-4.3645
ANKRD60	0.165729	-0.0103355	1.58427	0.119046	0.860637	-4.3652
MTND2P19	0.19643	-0.0876783	1.58421	0.119062	0.860637	-4.36524
OR7G15P	0.176178	-0.0096099	1.58384	0.119145	0.86097	-4.36545
ST8SIA3	0.215285	0.0175395	1.58348	0.119227	0.86097	-4.36566
TRIM72	0.194162	-0.0183106	1.58323	0.119285	0.86097	-4.3658
MTHFR	0.240725	-0.00320823	1.58321	0.119288	0.86097	-4.36581
GALK1	0.174896	0.0698235	1.58287	0.119366	0.861011	-4.366
RPL26P31	0.169843	0.0103878	1.58272	0.1194	0.861032	-4.36609
ARMCX5	0.282468	0.0318918	1.58165	0.119645	0.861449	-4.3667
DCLK3	0.170926	0.0232962	1.5813	0.119725	0.861449	-4.3669
PRELID3BP7	0.164072	0.00930644	1.58107	0.119779	0.861449	-4.36704
VWA5A	0.217774	-0.0563585	1.58084	0.119831	0.861449	-4.36717
EXOSC3P1	0.217628	-0.0360514	1.58057	0.119892	0.861449	-4.36732
AK9	0.268491	-0.0118675	1.58027	0.11996	0.861449	-4.36749
MGC45922	0.173374	0.0221674	1.58007	0.120006	0.861449	-4.3676
CDRT15P1	0.158789	0.0693883	1.57997	0.120029	0.861449	-4.36766
THOC3	0.266785	0.0554146	1.57985	0.120058	0.861449	-4.36773
OR5AZ1P	0.198703	0.0426488	1.57977	0.120075	0.861449	-4.36778
TPRG1-AS1	0.156773	-0.0547351	1.57941	0.120159	0.861449	-4.36799
TBC1D3	0.172269	-0.0348672	1.57934	0.120173	0.861449	-4.36802
ASZ1	0.179732	-0.0233872	1.57901	0.120251	0.861488	-4.36821
PLEKHA7	0.221743	0.0558281	1.57886	0.120284	0.861488	-4.3683
GMPR	0.257765	0.0668752	1.57803	0.120474	0.862253	-4.36877
POLR1A	0.197442	0.0782559	1.57762	0.12057	0.862253	-4.36901
VSTM5	0.194489	-0.0243661	1.57754	0.120588	0.862253	-4.36905
ERP29P1	0.188916	0.0382354	1.57696	0.120721	0.862253	-4.36938
OR1N1	0.233127	0.045689	1.57645	0.120839	0.862253	-4.36967
RXRA	0.260599	-0.0515702	1.57642	0.120846	0.862253	-4.36969
OR56A1	0.188919	0.00474334	1.57578	0.120993	0.862253	-4.37005
MREG	0.224989	0.0505563	1.57568	0.121016	0.862253	-4.37011
ACOXL	0.156886	0.019613	1.5756	0.121034	0.862253	-4.37015
RNF6P1	0.20783	0.0113303	1.57536	0.121089	0.862253	-4.37029
ST20-AS1	0.187275	0.0180791	1.57516	0.121135	0.862253	-4.3704
CLDN20	0.227491	-0.00237364	1.57481	0.121216	0.862253	-4.3706
PRPF40B	0.162019	-0.0247262	1.57466	0.121253	0.862253	-4.37069
TSPY11P	0.188376	0.0388256	1.57456	0.121273	0.862253	-4.37075
MTFMT	0.130667	0.0491191	1.57428	0.121339	0.862253	-4.37091
ACAD11	0.187001	-0.0378524	1.57411	0.121378	0.862253	-4.371
VSX1	0.190404	0.0547584	1.57399	0.121407	0.862253	-4.37107
OR10Z1	0.18157	-0.0115956	1.57374	0.121464	0.862253	-4.37121
EPB42	0.184104	0.00943837	1.57348	0.121523	0.862253	-4.37136
CSPG5	0.20263	0.00063125	1.57342	0.121537	0.862253	-4.37139
HOXA7	0.242055	-0.0376336	1.57147	0.121989	0.862253	-4.3725
TEX13B	0.175934	-0.0384032	1.57147	0.12199	0.862253	-4.3725
MUL1	0.209283	0.0479392	1.5706	0.122192	0.862253	-4.373
TSEN15P1	0.171501	0.007814	1.57047	0.122222	0.862253	-4.37307
EFEMP2	0.208217	-0.0466146	1.57029	0.122264	0.862253	-4.37317
ESX1	0.195349	0.0551177	1.57012	0.122304	0.862253	-4.37327
UBXN7-AS1	0.178614	0.0393215	1.56962	0.122421	0.862253	-4.37356
HORMAD2-AS1	0.230653	-0.0181679	1.56883	0.122604	0.862253	-4.374
WDR27	0.198212	0.0439787	1.56876	0.122621	0.862253	-4.37405
BTBD10P1	0.140326	-0.0282326	1.56849	0.122684	0.862253	-4.3742
CCL21	0.238895	-0.0390173	1.56762	0.122886	0.862253	-4.37469
PPFIA1	0.176898	0.0401789	1.56727	0.122968	0.862253	-4.37489
RASL11A	0.192252	0.157071	1.56649	0.123151	0.862253	-4.37533
ACOX2	0.220215	0.0294493	1.56634	0.123186	0.862253	-4.37542
BNIP3P29	0.232902	0.0244037	1.56631	0.123193	0.862253	-4.37543
ARHGAP42P1	0.177523	-0.0386154	1.56621	0.123218	0.862253	-4.37549
IGHV3-38	0.187381	0.00785165	1.56591	0.123286	0.862253	-4.37566
TRGV7	0.189667	-0.0367438	1.56582	0.123308	0.862253	-4.37571
AURKB	0.172651	0.0937097	1.56546	0.123393	0.862253	-4.37592
SMAD6	0.317903	0.00424941	1.56544	0.123398	0.862253	-4.37593
CCDC33	0.191575	0.00843245	1.5651	0.123476	0.862253	-4.37612
HNRNPCP1	0.156953	0.0101291	1.56501	0.123498	0.862253	-4.37617
MTND1P22	0.158848	0.0386691	1.56464	0.123584	0.862253	-4.37638
CLEC6A	0.150022	0.0098896	1.5645	0.123618	0.862253	-4.37646
SNORD23	0.149418	0.0304846	1.56442	0.123637	0.862253	-4.37651
CHEK2	0.196754	0.0339449	1.56408	0.123717	0.862253	-4.3767
MTND4LP20	0.155537	-0.0850323	1.56383	0.123774	0.862253	-4.37684
LARP1BP3	0.200047	-0.0453516	1.56362	0.123823	0.862253	-4.37696
CHIAP1	0.136491	-0.0579392	1.56336	0.123886	0.862253	-4.37711
[truncated: 25,303 more rows]

## Sheet: SE vs CT
Gene	logFC	AveExpr	t	P.Value	adj.P.Val	B
HIVEP2	0.438401	-0.0667386	3.8851	0.000216676	0.935826	-1.24613
SKOR2	0.264696	-0.0216682	3.85723	0.000238372	0.935826	-1.29335
TUBB3P2	0.322835	0.0236464	3.83999	0.000252812	0.935826	-1.32246
TSHB	0.262478	-0.0233377	3.61467	0.000537742	0.935826	-1.69657
SYF2P1	0.253699	0.0126982	3.39225	0.00110267	0.935826	-2.05313
SMG7-AS1	0.237228	-0.0145132	3.21611	0.00190868	0.935826	-2.3256
RPS6P20	0.221434	0.0111561	3.20644	0.001966	0.935826	-2.34028
LLPHP1	0.23978	0.0195338	3.14975	0.00233581	0.935826	-2.42581
TUBB4BP7	0.267068	0.0571679	3.13074	0.00247367	0.935826	-2.45426
CTNNA2	0.342409	0.00933186	3.09067	0.00278959	0.935826	-2.51386
SNORD111B	0.173849	-0.0184006	3.08164	0.00286582	0.935826	-2.52723
SLC30A10	0.26534	-0.1052	3.0792	0.00288676	0.935826	-2.53084
RAB43	0.330847	0.0197424	3.07567	0.00291725	0.935826	-2.53605
OR6C71P	0.211057	-0.00732429	3.03635	0.00327812	0.935826	-2.59384
USP9YP6	0.253013	0.0158136	3.01663	0.00347436	0.935826	-2.62264
OR52K2	0.229579	0.00426003	3.00513	0.0035937	0.935826	-2.63937
SPDYE5	0.244736	-0.0156826	2.98942	0.00376295	0.935826	-2.66215
ARSD	0.317779	0.0257649	2.98624	0.0037981	0.935826	-2.66676
BTBD10P1	0.18849	0.0309932	2.98088	0.00385806	0.935826	-2.67451
OR2A3P	0.227205	-0.00200451	2.97875	0.00388212	0.935826	-2.67759
AMY1B	0.223191	-0.0415575	2.97	0.00398238	0.935826	-2.69021
ZSCAN20	0.165968	-0.021509	2.94777	0.00424804	0.935826	-2.72216
MAT1A	0.218346	0.0396781	2.94249	0.00431361	0.935826	-2.72973
ADGRG2	0.209998	-0.0419284	2.94023	0.00434192	0.935826	-2.73297
RPRD1A	0.189186	0.00871434	2.9068	0.00478118	0.935826	-2.78062
GRIPAP1	0.24152	0.0177429	2.90479	0.00480882	0.935826	-2.78347
RECQL5	0.2594	0.00295648	2.90198	0.00484779	0.935826	-2.78746
ZNF45	0.197001	-0.0124162	2.88246	0.00512646	0.935826	-2.81507
IGHVIII-38-1	0.386437	-0.0511775	2.87921	0.00517415	0.935826	-2.81965
SLC22A2	0.199824	-0.0191779	2.86821	0.00533909	0.935826	-2.83514
BOLL	0.204837	0.0462148	2.8681	0.00534075	0.935826	-2.8353
PTH2R	0.330938	-0.0484582	2.85702	0.00551171	0.935826	-2.85086
MTND1P2	0.222613	-0.0197758	2.84823	0.00565092	0.935826	-2.86317
MTCO3P39	0.226767	0.00310438	2.84805	0.00565386	0.935826	-2.86342
NDUFB4P9	0.261824	-0.0290408	2.84628	0.00568224	0.935826	-2.8659
CTAGE15	0.201279	0.00114174	2.82892	0.00596815	0.935826	-2.89012
RCOR2	0.269671	0.0228881	2.8265	0.0060091	0.935826	-2.89349
TRAV9-1	0.218731	-0.00292346	2.82534	0.00602878	0.935826	-2.89511
PRMT3	0.248758	0.0448063	2.81092	0.00627861	0.935826	-2.91513
FHOD3	0.294653	-0.054622	2.79246	0.00661225	0.935826	-2.94066
WDR81	0.225351	0.0191469	2.77319	0.00697765	0.935826	-2.96716
ONECUT1	0.219248	-0.00573321	2.77119	0.00701671	0.935826	-2.96991
CTAGE12P	0.22524	-0.00503912	2.76892	0.00706125	0.935826	-2.97302
SMAD6	0.407961	0.136655	2.76872	0.00706505	0.935826	-2.97329
POLR3DP1	0.221975	0.00630826	2.76694	0.00710013	0.935826	-2.97573
RPS2P25	0.238635	0.0485684	2.75312	0.00737797	0.935826	-2.99463
DDIAS	0.213672	0.0183729	2.74421	0.00756244	0.935826	-3.00678
NMS	0.202797	0.00279861	2.7424	0.00760046	0.935826	-3.00925
IL13RA2	0.218895	-0.0528413	2.74123	0.00762512	0.935826	-3.01085
MAP9	0.24268	-0.0181622	2.72366	0.00800391	0.935826	-3.0347
LHPP	0.272734	-0.0221543	2.72029	0.00807843	0.935826	-3.03926
MTND4LP20	0.202853	-0.0292648	2.70761	0.00836478	0.935826	-3.05638
EPHA10	0.220099	-0.00925435	2.70568	0.00840914	0.935826	-3.05898
ZFP42	0.176072	0.00527625	2.70434	0.00844002	0.935826	-3.06078
POM121L6P	0.250293	-0.00735938	2.70403	0.00844733	0.935826	-3.06121
TAGLN3	0.204133	0.00363223	2.69758	0.00859787	0.935826	-3.06989
FLG	0.249609	0.0340943	2.68459	0.0089085	0.935826	-3.08733
ANKRD30BL	0.192936	0.00471349	2.68266	0.00895552	0.935826	-3.08991
ZNF969P	0.228647	0.00411781	2.67904	0.00904422	0.935826	-3.09475
PXT1	0.210133	0.00619463	2.66986	0.00927294	0.935826	-3.10701
FRY	0.254755	-0.0125461	2.66309	0.00944501	0.935826	-3.11604
HAVCR1P1	0.351491	-0.0635537	2.65644	0.00961701	0.935826	-3.1249
TMEM82	0.246513	-0.0148044	2.65423	0.00967471	0.935826	-3.12783
GXYLT1P1	0.219282	-0.00445406	2.64257	0.00998462	0.935826	-3.1433
ZNF90P3	0.178921	0.000658059	2.64052	0.01004	0.935826	-3.14601
AKAP7	0.230798	0.0501406	2.6371	0.010133	0.935826	-3.15053
MECOM	0.342453	0.116403	2.6305	0.0103147	0.935826	-3.15924
PPAN-P2RY11	0.212683	0.0684742	2.62892	0.0103587	0.935826	-3.16133
ZNF479	0.187873	0.01848	2.62745	0.0103997	0.935826	-3.16327
MEPE	0.248861	-0.0147836	2.62506	0.0104669	0.935826	-3.16643
FAM114A1	0.197155	-0.0600402	2.61764	0.0106774	0.935826	-3.17618
FANCD2OS	0.223452	0.0163901	2.61174	0.0108478	0.935826	-3.18394
SMAD1-AS2	0.202559	0.0288602	2.60568	0.0110251	0.935826	-3.19188
CYP4Z2P	0.234058	0.018686	2.59654	0.0112976	0.935826	-3.20383
ALKBH8	0.238219	-0.00379771	2.59116	0.0114611	0.935826	-3.21086
BTBD7P1	0.214449	0.012444	2.5887	0.0115364	0.935826	-3.21407
TRAV25	0.211813	-0.00346862	2.58719	0.0115829	0.935826	-3.21604
FAIM	0.210896	0.0661807	2.58479	0.0116572	0.935826	-3.21917
RPL7L1P10	0.222734	0.0299527	2.58366	0.0116922	0.935826	-3.22063
SS18L1	0.243129	0.0355633	2.57956	0.0118204	0.935826	-3.22597
EXTL2	0.233907	0.0617174	2.57413	0.0119922	0.935826	-3.23303
SNORD114-24	0.173442	-0.00912164	2.56435	0.0123071	0.935826	-3.2457
HUS1B	0.24043	-0.0585627	2.55661	0.0125614	0.935826	-3.2557
YAF2	0.212414	0.0801473	2.55367	0.0126592	0.935826	-3.25949
SAMD5	0.255381	0.0533639	2.55349	0.0126656	0.935826	-3.25973
RPL31P40	0.167185	0.0306225	2.55223	0.0127075	0.935826	-3.26135
OR6C68	0.204804	0.023172	2.55172	0.0127247	0.935826	-3.26201
MTCO2P3	0.175831	-0.0185858	2.55149	0.0127325	0.935826	-3.26231
PRKG2	0.191227	-0.0181387	2.54657	0.0128988	0.935826	-3.26865
METTL7A	0.184123	-0.0702854	2.53655	0.0132434	0.935826	-3.28152
MCTP2	0.190445	0.017824	2.53041	0.0134588	0.935826	-3.2894
PHBP2	0.230238	0.0541076	2.53024	0.0134646	0.935826	-3.28961
AMY1A	0.174894	-0.0284592	2.52694	0.0135817	0.935826	-3.29384
CCDC30	0.190014	-0.00502027	2.52683	0.0135855	0.935826	-3.29397
NCKAP5	0.202196	0.0165787	2.52251	0.0137402	0.935826	-3.2995
HECW1-IT1	0.20835	-0.0404945	2.52247	0.0137418	0.935826	-3.29955
PES1P1	0.166492	0.0149167	2.52025	0.0138216	0.935826	-3.30238
RPL23AP54	0.286208	0.045633	2.51796	0.0139049	0.935826	-3.30531
OR2A41P	0.205107	0.0343087	2.51398	0.0140505	0.935826	-3.31039
RPEP3	0.212833	0.0419191	2.51357	0.0140655	0.935826	-3.31091
BUD13P1	0.18894	0.00695167	2.51349	0.0140684	0.935826	-3.31101
CAPN11	0.215536	0.0388584	2.51323	0.014078	0.935826	-3.31135
BNIP3P15	0.199866	0.00711318	2.51216	0.0141171	0.935826	-3.3127
MAP4K5	0.254325	0.0252837	2.50876	0.0142432	0.935826	-3.31703
PRR4	0.304586	0.00474998	2.5061	0.0143423	0.935826	-3.32042
CPB1	0.261924	0.045932	2.50139	0.0145195	0.935826	-3.3264
PCDH9-AS3	0.229792	0.0189846	2.49871	0.0146211	0.935826	-3.3298
HS3ST3A1	0.241937	0.0311225	2.49566	0.0147376	0.935826	-3.33367
SEMA5A	0.408746	0.00309028	2.49558	0.0147407	0.935826	-3.33377
TBC1D3B	0.223489	0.00477085	2.49431	0.0147893	0.935826	-3.33538
C1QL1	0.175962	-0.0209609	2.49406	0.014799	0.935826	-3.33569
OTUD3	0.232246	0.0308781	2.49346	0.0148221	0.935826	-3.33646
ZNF295-AS1	0.219419	0.0300248	2.49257	0.0148564	0.935826	-3.33758
DOCK11P1	0.222311	0.0155734	2.49195	0.0148804	0.935826	-3.33837
GFM1	0.173887	-0.0353253	2.48846	0.0150157	0.935826	-3.34278
DUTP5	0.226549	-0.0269294	2.48724	0.0150634	0.935826	-3.34432
DGKG	0.185318	-0.0887234	2.48312	0.0152254	0.935826	-3.34953
FAM71E1	0.161456	-0.0045616	2.48123	0.0152999	0.935826	-3.35191
DEFB104A	0.207533	0.0211448	2.48117	0.0153025	0.935826	-3.35199
XKRY2	0.189555	0.0454208	2.4738	0.0155971	0.935826	-3.36128
WRAP53	0.170424	0.0369256	2.47353	0.015608	0.935826	-3.36162
SNORD91A	0.166175	0.00560611	2.46813	0.015827	0.935826	-3.3684
DUTP3	0.223548	-0.0142673	2.46499	0.015956	0.935826	-3.37235
SOX1	0.19774	-0.00313585	2.46201	0.0160789	0.935826	-3.37608
CYP4F11	0.19896	0.0100457	2.45591	0.0163334	0.935826	-3.38372
GPR75-ASB3	0.163001	0.0397733	2.45177	0.0165085	0.935826	-3.38891
SLC14A2-AS1	0.191994	-0.0291586	2.44832	0.0166556	0.935826	-3.39322
R3HDM2P1	0.170354	-0.0624975	2.44534	0.0167833	0.935826	-3.39693
POU6F2-AS2	0.185794	-0.0165578	2.43625	0.0171789	0.935826	-3.40825
HNRNPMP1	0.184334	-0.0200386	2.43529	0.017221	0.935826	-3.40944
RFX6	0.193691	0.0356281	2.43361	0.0172952	0.935826	-3.41153
SEMA6A-AS1	0.174935	0.0131817	2.4336	0.0172959	0.935826	-3.41155
AKAP14	0.221642	0.0169133	2.43217	0.0173593	0.935826	-3.41333
ZNF48	0.152886	-0.0495158	2.43178	0.0173763	0.935826	-3.4138
SLAMF9	0.177446	0.0575787	2.43173	0.0173788	0.935826	-3.41387
CFC1	0.188265	0.020258	2.43001	0.0174552	0.935826	-3.416
CDY15P	0.214575	0.0465965	2.42748	0.0175685	0.935826	-3.41914
ARNT	0.171722	0.0348736	2.4269	0.0175944	0.935826	-3.41986
OCIAD1-AS1	0.218054	-0.0132204	2.42057	0.0178808	0.935826	-3.4277
RAB3B	0.260645	0.0275932	2.41665	0.0180603	0.935826	-3.43255
MEP1A	0.43695	-0.0731097	2.41375	0.0181939	0.935826	-3.43612
TNIP2	0.197133	-0.04484	2.40881	0.0184239	0.935826	-3.44222
EBAG9P1	0.182278	0.0154825	2.40788	0.0184677	0.935826	-3.44337
RPL5P32	0.208028	0.00411876	2.40502	0.0186022	0.935826	-3.44689
CRY1	0.202752	0.0572841	2.40392	0.0186544	0.935826	-3.44825
RPL23AP96	0.199102	-0.00140669	2.40381	0.0186592	0.935826	-3.44837
PIGC	0.224942	0.0332124	2.39893	0.0188916	0.935826	-3.45437
SENP1	0.229054	0.0181844	2.39807	0.0189328	0.935826	-3.45543
ZZEF1	0.265639	-0.101207	2.3955	0.0190566	0.935826	-3.45859
CCNB1IP1P1	0.202299	0.0657753	2.38955	0.0193453	0.935826	-3.46588
RPL23P11	0.167946	0.0238455	2.3874	0.0194506	0.935826	-3.46851
FASTKD3	0.188526	-0.0045005	2.38472	0.0195829	0.935826	-3.47179
ARL4AP1	0.2486	0.0944935	2.38339	0.0196486	0.935826	-3.47341
MTND4P26	0.180388	-0.0210661	2.3823	0.0197029	0.935826	-3.47475
CYP26C1	0.164396	-0.00980812	2.38163	0.019736	0.935826	-3.47556
CHMP2A	0.185586	0.0160184	2.37939	0.0198478	0.935826	-3.4783
MRPL54	0.185525	0.0259252	2.3747	0.0200838	0.935826	-3.48402
KCNU1	0.173603	0.0105028	2.37095	0.0202739	0.935826	-3.48858
RAD51-AS1	0.196761	-0.0374422	2.36269	0.020699	0.935826	-3.49862
ANKRD26P1	0.175787	0.0463638	2.36131	0.0207706	0.935826	-3.5003
OR4K3	0.18455	0.0102103	2.35383	0.0211634	0.935826	-3.50936
SLC45A1	0.176338	-0.0100459	2.35356	0.0211778	0.935826	-3.50968
CCDC175	0.333549	0.154682	2.35154	0.0212853	0.935826	-3.51213
ITGB5	0.213596	0.00971253	2.34891	0.0214258	0.935826	-3.51531
LRRC69	0.262409	0.0346748	2.34855	0.0214449	0.935826	-3.51574
UQCRHP1	0.142179	-0.00315627	2.34852	0.0214464	0.935826	-3.51578
EIF1P1	0.205372	0.0197056	2.34721	0.021517	0.935826	-3.51737
RPS29P13	0.148399	-0.000400526	2.3428	0.0217551	0.935826	-3.52268
ACBD7	0.180064	-8.79995e-05	2.34199	0.0217987	0.935826	-3.52365
ANKRD1	0.191864	-0.000163154	2.33598	0.0221279	0.935826	-3.53089
PTPRQ	0.225399	-0.0369711	2.33478	0.0221941	0.935826	-3.53234
COL6A6	0.230284	-0.0321305	2.33437	0.0222167	0.935826	-3.53283
OR51F2	0.153972	0.0246943	2.33207	0.0223441	0.935826	-3.53559
MTND4P17	0.207422	-0.0130308	2.3306	0.0224261	0.935826	-3.53736
DDX11-AS1	0.205788	0.0415619	2.32825	0.0225573	0.935826	-3.54017
PRO1804	0.184474	-0.0063998	2.32605	0.0226808	0.935826	-3.54281
DIXDC1	0.181656	-0.0027013	2.32578	0.022696	0.935826	-3.54313
OIT3	0.18554	0.0118613	2.32545	0.0227151	0.935826	-3.54354
HMGN1P16	0.218721	-0.04316	2.32244	0.0228849	0.935826	-3.54713
TBC1D3	0.162684	0.0158687	2.32101	0.0229665	0.935826	-3.54885
POLI	0.226217	-0.0788518	2.32042	0.023	0.935826	-3.54955
MGAT4D	0.173758	0.0431374	2.3183	0.023121	0.935826	-3.55208
MOS	0.176733	-0.0212371	2.31816	0.0231292	0.935826	-3.55225
SIRPD	0.195105	0.0120843	2.31504	0.0233086	0.935826	-3.55598
ACVR2B	0.248195	-0.00884251	2.31478	0.0233235	0.935826	-3.55629
NHS-AS1	0.215994	0.0472595	2.31451	0.0233389	0.935826	-3.55661
SLC5A11	0.162413	0.0081134	2.31428	0.0233523	0.935826	-3.55688
DPPA2P1	0.184998	0.0115333	2.31073	0.0235583	0.935826	-3.56112
IHH	0.303205	0.068539	2.30774	0.0237329	0.935826	-3.56468
CYP2C61P	0.244572	0.0377512	2.30703	0.023775	0.935826	-3.56554
AVIL	0.181919	0.0328703	2.30525	0.0238794	0.935826	-3.56765
ZNF557	0.15804	-0.00368728	2.3045	0.0239238	0.935826	-3.56854
RBM46	0.212926	0.0039941	2.30389	0.02396	0.935826	-3.56927
EGFLAM-AS4	0.181	-0.0398269	2.30341	0.0239881	0.935826	-3.56984
FLJ25758	0.208227	0.0298391	2.29895	0.0242535	0.935826	-3.57514
RPL39P31	0.202845	0.0448409	2.29891	0.0242555	0.935826	-3.57518
SMIM10	0.206195	-0.0394171	2.29824	0.0242961	0.935826	-3.57598
TMCO2	0.178734	0.0116605	2.29733	0.0243504	0.935826	-3.57706
ID1	0.264842	0.0213588	2.29638	0.0244076	0.935826	-3.57819
SDCBP2P1	0.186288	0.00131235	2.29536	0.0244686	0.935826	-3.57939
TNNT1	0.142681	-0.0183984	2.29346	0.0245831	0.935826	-3.58164
HIGD1AP16	0.210186	0.00777635	2.29341	0.0245864	0.935826	-3.58171
PYM1	0.191143	0.0307741	2.2853	0.0250813	0.935826	-3.5913
RINT1	0.160812	0.0100234	2.28393	0.0251659	0.935826	-3.59292
OR2J4P	0.167925	0.00497849	2.28291	0.0252286	0.935826	-3.59412
RBM41	0.196556	0.0659152	2.28173	0.025302	0.935826	-3.59552
FOLH1B	0.178182	-0.00972393	2.28035	0.0253876	0.935826	-3.59715
CHODL-AS1	0.158681	0.00360666	2.28016	0.0253993	0.935826	-3.59737
TLE2	0.160823	-0.0108675	2.27971	0.0254276	0.935826	-3.5979
RBM22P12	0.193803	0.0464086	2.27797	0.0255361	0.935826	-3.59995
OR4C16	0.179883	0.00940663	2.27466	0.0257437	0.935826	-3.60385
CR2	0.251265	-0.181298	2.27407	0.0257807	0.935826	-3.60454
HNRNPH1P2	0.14925	-0.0175195	2.27356	0.0258132	0.935826	-3.60514
CAPN6	0.23085	0.0162991	2.27321	0.0258351	0.935826	-3.60555
RRH	0.237952	0.0851792	2.27125	0.0259592	0.935826	-3.60785
SIGLEC28P	0.169823	0.0125897	2.27101	0.0259745	0.935826	-3.60814
ZNF652P1	0.181967	-0.0466809	2.26374	0.0264397	0.935826	-3.61667
DDN	0.201259	0.00581712	2.25996	0.0266847	0.935826	-3.62111
MTRNR2L10	0.214328	0.0140474	2.25923	0.0267317	0.935826	-3.62195
PPP1R2P2	0.144105	0.022967	2.25709	0.0268713	0.935826	-3.62445
OR5H6	0.198054	0.0132232	2.25296	0.0271431	0.935826	-3.62929
NRDE2	0.201605	0.00107702	2.25197	0.0272083	0.935826	-3.63044
CCDC81	0.164329	0.0419011	2.25148	0.0272406	0.935826	-3.63101
THAP7-AS1	0.195472	-0.0218073	2.25066	0.027295	0.935826	-3.63197
CLTCL1	0.157365	0.0194183	2.24937	0.0273811	0.935826	-3.63348
NKX2-1-AS1	0.192755	-0.022192	2.24815	0.027462	0.935826	-3.6349
PAQR8	0.179284	0.00234682	2.24789	0.0274795	0.935826	-3.6352
DFFA	0.25215	0.00522462	2.24635	0.0275825	0.935826	-3.637
USP9YP8	0.198731	0.0115015	2.24573	0.0276235	0.935826	-3.63771
PCDHGB8P	0.196982	0.0168624	2.24413	0.0277312	0.935826	-3.63958
SULT1C2P1	0.249933	0.0355291	2.23954	0.0280415	0.935826	-3.64492
MUC2	0.739268	-0.398342	2.23853	0.0281101	0.935826	-3.64609
MACC1-AS1	0.200167	-0.0225969	2.23808	0.0281406	0.935826	-3.64661
OR5W1P	0.17047	-0.0121605	2.23774	0.0281638	0.935826	-3.64701
USP49	0.151168	-0.010262	2.23768	0.0281679	0.935826	-3.64708
OR4N2	0.175245	0.0111602	2.23765	0.0281702	0.935826	-3.64712
NODAL	0.193369	0.0170906	2.23741	0.0281861	0.935826	-3.64739
PIN4P1	0.201581	0.0789057	2.23662	0.0282405	0.935826	-3.64831
OR4F17	0.191625	-0.00570079	2.23495	0.0283547	0.935826	-3.65025
FGA	0.189553	0.0128763	2.23461	0.0283779	0.935826	-3.65064
HBBP1	0.16111	-0.0316627	2.23249	0.0285237	0.935826	-3.6531
GYPE	0.15734	-0.0116245	2.23135	0.0286022	0.935826	-3.65442
IL23R	0.237872	0.0143796	2.22975	0.0287135	0.935826	-3.65628
ZFPM2	0.196082	-0.0323019	2.22974	0.028714	0.935826	-3.65629
CST11	0.184098	0.0102695	2.22852	0.0287983	0.935826	-3.65769
RPL7L1P5	0.198592	0.0415013	2.22846	0.0288027	0.935826	-3.65777
NDUFB4P8	0.213878	0.00611935	2.22752	0.0288682	0.935826	-3.65886
NDUFS5P4	0.197099	0.0350933	2.2256	0.0290025	0.935826	-3.66108
KRBOX1-AS1	0.216	0.0229096	2.2202	0.0293819	0.935826	-3.66731
OR52E1	0.16397	0.0205448	2.22002	0.0293951	0.935826	-3.66752
AURKC	0.197348	0.023856	2.2184	0.0295099	0.935826	-3.66939
LENG1	0.140899	0.00447845	2.218	0.0295379	0.935826	-3.66985
TIMELESS	0.192941	0.0319582	2.21685	0.0296197	0.935826	-3.67117
CALML3-AS1	0.177022	-0.00887856	2.21565	0.0297054	0.935826	-3.67255
TIMM9P1	0.15174	-0.00470686	2.21149	0.0300039	0.935826	-3.67734
SMIM8	0.200201	0.0548441	2.20743	0.0302981	0.935826	-3.68201
GSTA12P	0.158622	-0.037746	2.20677	0.030346	0.935826	-3.68277
CDY4P	0.167973	0.00642233	2.20553	0.0304365	0.935826	-3.68419
OR2A25	0.190057	0.0315039	2.20506	0.0304706	0.935826	-3.68473
TBC1D3C	0.155514	0.0129739	2.20462	0.0305028	0.935826	-3.68524
PRLR	0.326883	0.0339732	2.20444	0.0305158	0.935826	-3.68544
C16orf46	0.158065	0.0368952	2.20368	0.0305718	0.935826	-3.68632
OR2N1P	0.161971	-0.030302	2.20188	0.0307035	0.935826	-3.68837
THAP10	0.214486	0.0930484	2.19812	0.0309811	0.935826	-3.69268
RPL7AP56	0.141532	-0.0472588	2.19067	0.0315375	0.935826	-3.70119
LSM3P4	0.164531	-0.0363865	2.18812	0.0317304	0.935826	-3.70411
ST6GAL2-IT1	0.164876	-0.00684303	2.18682	0.0318287	0.935826	-3.70559
NADK2-AS1	0.161667	0.000688074	2.18637	0.0318628	0.935826	-3.7061
NIPA2P1	0.155808	-0.0222752	2.18259	0.0321512	0.935826	-3.7104
ZNF2	0.152199	0.00539871	2.18052	0.0323099	0.935826	-3.71276
CCDC144A	0.205495	0.0239532	2.18	0.0323502	0.935826	-3.71335
NDUFAF4P2	0.173251	0.0739254	2.17904	0.0324238	0.935826	-3.71444
COX10-AS1	0.220449	0.00481934	2.17421	0.0327979	0.935826	-3.71991
MTND5P28	0.120561	0.0249296	2.17277	0.0329107	0.935826	-3.72155
ADAMTS8	0.18483	0.0411059	2.17072	0.0330713	0.935826	-3.72388
SMIM23	0.176833	0.0408488	2.17001	0.0331268	0.935826	-3.72468
FZD10-AS1	0.280613	0.024223	2.16777	0.0333036	0.935826	-3.72722
DUXAP2	0.200124	0.00894815	2.16673	0.0333853	0.935826	-3.72839
KLHL41	0.147349	0.0391863	2.16454	0.0335594	0.935826	-3.73087
HSD3BP3	0.189261	0.0238991	2.16302	0.0336798	0.935826	-3.73258
PCNPP4	0.166823	0.0285263	2.16218	0.0337471	0.935826	-3.73353
DPH5	0.238088	0.00497873	2.15944	0.0339666	0.935826	-3.73662
YPEL5P3	0.168481	0.0376969	2.15929	0.0339791	0.935826	-3.73679
RPS26P45	0.186933	0.0103787	2.15776	0.0341019	0.935826	-3.73851
OR52K1	0.171972	0.0245262	2.15755	0.034119	0.935826	-3.73875
IGBP1P5	0.183043	-0.0150283	2.15737	0.0341336	0.935826	-3.73896
KIAA2026	0.196919	-0.0396018	2.15695	0.0341672	0.935826	-3.73943
G6PC2	0.181885	-0.00545673	2.15615	0.0342319	0.935826	-3.74033
SERPINE4P	0.13577	-0.0282802	2.15436	0.0343767	0.935826	-3.74234
SLC17A4	0.357404	-0.094136	2.15118	0.0346359	0.935826	-3.74592
OR7G15P	0.156144	0.0289702	2.15071	0.0346746	0.935826	-3.74645
GABRR3	0.194226	0.00276278	2.15012	0.0347221	0.935826	-3.74711
PPM1K	0.176579	0.0373626	2.14936	0.0347849	0.935826	-3.74797
ZSCAN26	0.19953	-0.0478429	2.14794	0.034901	0.935826	-3.74955
MAPKAPK5-AS1	0.155689	0.0260491	2.14549	0.0351031	0.935826	-3.7523
C2orf91	0.207674	-0.0143227	2.14511	0.0351352	0.935826	-3.75274
DBIL5P2	0.159721	0.00674514	2.14507	0.0351381	0.935826	-3.75278
CASC6	0.162837	0.0253962	2.14422	0.0352088	0.935826	-3.75374
NRSN1	0.204233	-0.0347728	2.14276	0.0353299	0.935826	-3.75537
KIFC2	0.167551	-0.018875	2.14035	0.0355309	0.935826	-3.75807
COPS8P3	0.165058	-0.00405168	2.13902	0.035642	0.935826	-3.75956
B4GALT6	0.155461	0.0582006	2.13739	0.0357784	0.935826	-3.76138
WFDC10A	0.145703	-0.0178912	2.13526	0.035958	0.935826	-3.76376
CYP4F44P	0.191447	0.0102748	2.13495	0.0359842	0.935826	-3.76411
MAGEB5	0.168557	0.0377546	2.13232	0.0362067	0.935826	-3.76704
NXNL1	0.148829	-0.0205489	2.13093	0.0363252	0.935826	-3.76859
HNRNPA1P68	0.153375	0.0594357	2.12479	0.0368508	0.935826	-3.77543
GPX7	0.153509	0.00679172	2.12398	0.0369212	0.935826	-3.77633
ZNF771	0.132642	0.00693691	2.1239	0.0369282	0.935826	-3.77642
CFL1P7	0.168115	0.0200168	2.12301	0.0370048	0.935826	-3.77741
MTCO3P1	0.172844	0.00128866	2.12295	0.0370097	0.935826	-3.77747
NUDT10	0.111847	-0.0188165	2.12292	0.0370122	0.935826	-3.7775
DPY19L3	0.216605	0.0770542	2.12183	0.0371066	0.935826	-3.77871
DRC1	0.188602	-0.0094806	2.11863	0.0373857	0.935826	-3.78228
FGFBP1	0.304458	0.0384195	2.11847	0.0373994	0.935826	-3.78245
NLRP1	0.139757	-0.043843	2.11794	0.0374457	0.935826	-3.78304
RPL21P10	0.25853	0.0221446	2.11666	0.0375576	0.935826	-3.78446
HMGN2P13	0.169396	-0.0409596	2.1162	0.0375985	0.935826	-3.78497
CLHC1	0.157191	0.0495089	2.11505	0.0376992	0.935826	-3.78624
DEFB112	0.183914	0.0287448	2.10829	0.0382976	0.935826	-3.79372
OVCH1	0.188992	-0.00248007	2.1076	0.0383593	0.935826	-3.79449
SNORA27	0.178041	0.0245438	2.10687	0.0384247	0.935826	-3.7953
FAM177A1	0.214134	0.0681077	2.10305	0.0387677	0.935826	-3.79951
TAS2R50	0.127179	-0.0165641	2.09937	0.0391005	0.935826	-3.80357
OR2J2	0.162065	-0.0325349	2.09318	0.0396652	0.935826	-3.81037
HIF1AP1	0.151381	-0.0318483	2.09315	0.0396679	0.935826	-3.8104
HRH4	0.164363	0.000726047	2.09084	0.0398811	0.935826	-3.81294
TPMTP2	0.194239	-0.0241146	2.08952	0.0400033	0.935826	-3.81439
FAIM2	0.345656	-0.00806166	2.08705	0.0402326	0.935826	-3.8171
ABCD3	0.172423	0.0306757	2.0856	0.0403676	0.935826	-3.81869
BTBD8	0.164043	0.034854	2.08322	0.0405905	0.935826	-3.8213
MTMR1	0.169207	-0.0174759	2.08114	0.0407855	0.935826	-3.82357
SFR1P1	0.206417	0.0437961	2.0801	0.0408837	0.935826	-3.82471
ADAM20P2	0.16478	-0.043645	2.07952	0.0409384	0.935826	-3.82534
RRP36	0.207889	0.0317272	2.07939	0.0409506	0.935826	-3.82548
PAPSS2	0.233761	-0.0917632	2.07879	0.0410073	0.935826	-3.82614
PIGPP4	0.124392	-0.00333636	2.0777	0.0411107	0.935826	-3.82733
MTCO1P29	0.151188	-0.0052684	2.07694	0.041183	0.935826	-3.82816
CDR2L	0.211281	0.0668323	2.07686	0.0411898	0.935826	-3.82824
PDILT	0.134924	0.00344716	2.07673	0.0412028	0.935826	-3.82839
OR52H1	0.2288	0.0208551	2.07516	0.041352	0.935826	-3.8301
RAC1P9	0.136812	0.000129244	2.0751	0.0413577	0.935826	-3.83016
TRAV11	0.211106	-0.0270704	2.07436	0.0414277	0.935826	-3.83096
GMNC	0.171939	-0.028139	2.0712	0.0417304	0.935826	-3.83441
PRELID3BP8	0.180263	0.0052001	2.07102	0.0417483	0.935826	-3.83461
SLC7A9	0.18467	-0.00728586	2.06839	0.0420008	0.935826	-3.83747
FLJ31356	0.211582	-0.0103088	2.068	0.0420392	0.935826	-3.8379
SCN2A	0.157611	-0.00987434	2.06682	0.0421535	0.935826	-3.83918
HOXD12	0.156497	0.0243012	2.06613	0.0422197	0.935826	-3.83992
MPZL2	0.186138	-0.0313633	2.06225	0.0425975	0.935826	-3.84414
MTCO3P20	0.166511	-0.0135007	2.06148	0.0426726	0.935826	-3.84497
HELQ	0.150541	-0.0104899	2.06076	0.0427437	0.935826	-3.84576
SUMO1P2	0.130836	0.0199673	2.05665	0.0431482	0.935826	-3.85021
OR10A2	0.166871	0.0208918	2.05637	0.0431761	0.935826	-3.85051
SMARCE1P6	0.188882	-0.00259123	2.05431	0.0433802	0.935826	-3.85274
CCDC181	0.138681	-0.00950217	2.05335	0.0434751	0.935826	-3.85377
RPL17P44	0.178694	0.0684718	2.05279	0.043531	0.935826	-3.85438
STX19	0.234735	-0.0197178	2.05175	0.0436346	0.935826	-3.8555
GEMIN4	0.224378	0.0946262	2.05138	0.0436712	0.935826	-3.8559
IGKV2-38	0.173837	-0.0191709	2.05105	0.0437043	0.935826	-3.85626
RRS1-AS1	0.158924	0.00611045	2.04981	0.0438282	0.935826	-3.85759
IL20RB-AS1	0.173816	-0.0215547	2.04934	0.0438762	0.935826	-3.85811
NF1	0.261797	0.0859886	2.04785	0.044025	0.935826	-3.85971
PSMD9	0.140637	0.0349108	2.04498	0.0443149	0.935826	-3.86281
ZAN	0.151881	-0.0106848	2.04414	0.0444003	0.935826	-3.86372
RERGL	0.141756	-0.0866577	2.04197	0.0446205	0.935826	-3.86605
PTPRF	0.167822	-0.0408048	2.04187	0.04463	0.935826	-3.86615
HMGN1P34	0.177402	-0.0592559	2.04083	0.0447359	0.935826	-3.86727
USP9YP31	0.160052	0.0405323	2.0389	0.0449329	0.935826	-3.86934
CFAP52	0.157665	-0.00982165	2.03862	0.0449616	0.935826	-3.86964
UBASH3A	0.150735	0.000521539	2.03668	0.0451607	0.935826	-3.87173
SCN5A	0.170244	0.0341241	2.03618	0.0452126	0.935826	-3.87227
SOS2	0.161838	-0.015966	2.03579	0.0452522	0.935826	-3.87268
OR4K5	0.170217	-0.0291943	2.03358	0.0454808	0.935826	-3.87506
DNAJC14	0.185529	0.056694	2.03357	0.0454822	0.935826	-3.87507
ANKRD30BP2	0.161324	-0.033704	2.03329	0.0455109	0.935826	-3.87537
RRM2	0.20332	0.0944517	2.03286	0.0455551	0.935826	-3.87583
GRM7-AS1	0.15559	-0.0179575	2.03074	0.0457753	0.935826	-3.8781
SLAMF1	0.161299	-0.0475647	2.03029	0.0458218	0.935826	-3.87858
TRBV29-1	0.145584	0.019868	2.03016	0.0458353	0.935826	-3.87872
HSPC324	0.189653	-0.0099576	2.02946	0.0459087	0.935826	-3.87947
USP9YP36	0.158355	0.0222313	2.02917	0.0459391	0.935826	-3.87978
FAM74A3	0.157633	-0.00835016	2.02867	0.0459908	0.935826	-3.88031
MAGEB2	0.122618	-0.00748378	2.02716	0.0461485	0.935826	-3.88193
[truncated: 26,918 more rows]

## Sheet: TB vs CT
Gene	logFC	AveExpr	t	P.Value	adj.P.Val	B
[truncated: 27,302 more rows]

## Sheet: MU vs DE
Gene	logFC	AveExpr	t	P.Value	adj.P.Val	B
[truncated: 27,302 more rows]

[truncated: 9 more sheets: PP vs DE, SE vs DE, TB vs DE, PP vs MU, SE vs MU, TB vs MU, SE vs PP, TB vs PP, TB vs SE]
