# Supplementary material for: Molecular portraits of colorectal cancer morphological regions
Source: eLife. 2023 Nov 13;12:RP86655. doi: 10.7554/eLife.86655 (PMC10642970; doi:10.7554/eLife.86655)
Supplement: Supplementary file 12. [file elife-86655-supp12.xlsx]

## Sheet: Content
GSEA results for ranked gene lists obtained by comparing pairs of morphotypes.
These results cover all the signtures in MSigDB, but only statistically significant results
are shown.
For each category in MSigDB and each pair of morphotype, there is a separate sheet.
For example, H.CT.DE indicates section H (hallmark pathways) of MSigDB applied to
the list resulting from comparing CT with DE, with CT being the baseline. It means,
a positive NES (normalized enrichment score) indicates a pathway (more) activated
in DE than in CT. And so on.

## Sheet: H.CT.DE
	pathway	pval	padj	ES	NES	nMoreExtreme	size	leadingEdge	Enrichment
1	EPITHELIAL_MESENCHYMAL_TRANSITION_up	0.000332116	0.000964643	0.76479	3.78503	0	197	LAMA2, SLIT3, LGALS1, LOXL1, FBN1, SPARC, PRRX1, LOX, LUM, COL1A2, SPOCK1, FSTL1, ACTA2, THY1, BASP1, SNAI2, BGN, MXRA5, CTHRC1, MMP2, HTRA1, GEM, FAP, COL5A1, INHBA, SFRP4, COL6A3, FBLN5, FERMT2, TAGLN, THBS2, COL1A1, POSTN, CALD1, NID2, SERPINE1, MFAP5, COL3A1, ITGA5, DCN, COL12A1, TIMP3, GREM1, THBS1, VIM, COL6A2, RGS4, PLOD2, SFRP1, MYL9, LRP1, MGP, ADAM12, VCAN, TPM4, EMP3, EFEMP2, ITGB5, FL…	Up-regulated
2	TNFA_SIGNALING_VIA_NFKB_up	0.000333111	0.000964643	0.516199	2.55556	0	198	TNFAIP6, GEM, INHBA, GFPT2, SERPINE1, RCAN1, MSC, KLF9, TNFAIP8, EGR2, NR4A3, RHOB, TNC, ACKR3, SPSB1, GPR183, SIK1, PDLIM5, EGR1, F3, DUSP1, JAG1, SLC16A6, SGK1, KYNU, PLK2, GADD45B, TNFAIP3, CCL2, MCL1, SOCS3, SLC2A3, IL6ST, MAFF, FOSB, PLPP3, CD83, KDM6B, IER2, PNRC1, OLR1, EGR3, PLEK, TIPARP, LAMB3, PANX1, TUBB2A, PMEPA1, DENND5A, GADD45A, TNFAIP2, IL6, PTX3, ZFP36, NFKBIA, CD44, BHLHE40, NR4…	Up-regulated
3	COAGULATION_up	0.000299401	0.000964643	0.530368	2.49567	0	138	FBN1, SPARC, CTSK, MMP2, HTRA1, SERPINE1, C3, C1R, TIMP3, THBS1, LRP1, ANXA1, KLF7, C1S, CFH, GSN, CLU, TIMP1, FN1, COMP, F3, MMP14, CSRP1, CPQ, RGN, RAPGEF3, TF, CFI, MAFF, A2M, MMP7, OLR1, PLEK, ARF4, F9, MASP2, CTSB, MMP9, USP11, DUSP14, APOC1	Up-regulated
4	UV_RESPONSE_dn	0.00029985	0.000964643	0.510819	2.40619	0	139	COL1A2, SNAI2, EFEMP1, FBLN5, COL1A1, IGFBP5, ATP2B4, SERPINE1, COL3A1, RUNX1, PTPRM, RGS4, NEK7, ADGRL2, CDC42BPA, SMAD7, NRP1, COL11A1, PMP22, DAB2, NR3C1, PDLIM5, GJA1, F3, DUSP1, IGF1R, ATXN1, KIT, PLPP3, PIAS3, DLC1, RBPMS, ACVR2A, CDON, ZMIZ1, CITED2, SDC2, IRS1, LTBP1, PDGFRB, DLG1, COL5A2, CELF2, ATRN, RXRA, HAS2, APBB2, TGFBR2, BHLHE40, DBP, SIPA1L1, KALRN, PRKAR2B, LAMC1, CAP2	Up-regulated
5	MYOGENESIS_up	0.000332116	0.000964643	0.44579	2.20627	0	197	LAMA2, SPARC, AEBP1, COL6A3, WWTR1, TAGLN, COL1A1, COL3A1, COL6A2, ADAM12, CNN3, ITGB5, SSPN, GSN, CLU, PTGIS, IGFBP3, MYLK, IGFBP7, APOD, GNAO1, MRAS, MEF2D, GADD45B, PDLIM7, IGF1, PPP1R3C, CASQ2, MEF2A, COL15A1, TPM2, TNNC1, CSRP3, DMPK, PRNP, ITGB1, ANKRD2, COX7A1, GJA5, EFS, GABARAPL2, MYH11, PSEN2, TGFB1, HSPB8, PKIA, NAV2, PC, MYH9, FABP3, FXYD1, BHLHE40, CRYAB, FOXO4, AGRN, AK1, SGCD, MYL4…	Up-regulated
7	TGF_BETA_SIGNALING_up	0.000265816	0.000964643	0.519115	2.06707	0	54	WWTR1, SERPINE1, RAB31, THBS1, ACVR1, SKI, SMAD7, NOG, SKIL, LTBP2, BCAR3, APC, ID3, CDK9, PMEPA1, TGFB1, TGFBR1, SMURF1, BMPR2, KLF10, SMAD3, JUNB, PPP1R15A, IFNGR2, ID2, PPM1A	Up-regulated
8	HYPOXIA_up	0.000330907	0.000964643	0.411763	2.0308	0	193	TGFB3, LOX, BGN, COL5A1, AKAP12, SERPINE1, DCN, LXN, CSRP2, KLF7, ACKR3, NR3C1, TMEM45A, IGFBP3, WSB1, F3, DUSP1, MT2A, TNFAIP3, BNIP3L, PAM, IDS, SLC2A3, SLC2A5, PPP1R3C, MAFF, PIM1, KLHL24, PLIN2, PNRC1, TPBG, CITED2, SDC2, TIPARP, CXCR4, TGM2, RORA, IL6, ZFP36, MYH9, NDST1, TKTL1, BHLHE40, HDLBP, CHST3, FOS, MAP3K1, DPYSL4, JUN, FOSL2, SLC2A1, RRAGD, HAS1	Up-regulated
9	INFLAMMATORY_RESPONSE_up	0.000334672	0.000964643	0.390082	1.93185	0	199	TNFAIP6, INHBA, PCDH7, SERPINE1, ITGA5, DCBLD2, MSR1, PIK3R5, EMP3, OSMR, GABBR1, GPR183, TIMP1, STAB1, F3, MMP14, CCL2, BST2, IL1R1, KCNA3, TNFSF15, PDPN, CD48, BDKRB1, RASGRP1, ADGRE1, AQP9, CALCRL, TPBG, OLR1, C5AR1, ACVR2A, NDP, CCL17, HIF1A, C3AR1, CYBB, IL6, NFKBIA, HAS2, IL10RA, IL2RB, MEFV, CD40, LAMP3, TAPBP, RELA, IRAK2, CLEC5A, LIF, PTGIR, BTG2, CD70, RAF1	Up-regulated
10	APOPTOSIS_up	0.000318674	0.000964643	0.398916	1.90911	0	158	PLPPR4, LUM, BGN, MMP2, DCN, TIMP3, EMP1, ANXA1, RHOB, AVPR1A, F2R, DPYD, SMAD7, GSN, CLU, TIMP1, LEF1, TGFB2, GADD45B, BNIP3L, PEA15, MCL1, EGR3, PDGFRB, CREBBP, PSEN2, GADD45A, IGFBP6, GPX1, IL6, BCL2L11, FDXR, PPP2R5B, CYLD, CD44, NEDD9, DAP, LMNA, PPT1, CASP4, RARA, RELA, JUN, SOD2, BTG2, TXNIP	Up-regulated
11	COMPLEMENT_up	0.000333111	0.000964643	0.376036	1.86165	0	198	ZEB1, SERPINE1, C3, C1R, LRP1, PIK3R5, DOCK10, DGKG, C1S, ZFPM2, CFH, CLU, TIMP1, FN1, F3, MMP14, KYNU, ANXA5, CSRP1, CBLB, GNG2, CPQ, TNFAIP3, CTSL, MAFF, GNAI2, RASGRP1, PIM1, CD59, OLR1, PLEK, CTSB, APOBEC3F, PRCP, CDK5R1, IL6, APOC1, APOA4, HPCAL4, KCNIP3, RBSN, PIK3CA, PLA2G4A, CPM, CASP4, MMP8, FCN1, F10, CTSD, S100A9, GNB4, RAF1, C1QC, L3MBTL4, USP8, JAK2, C1QA	Up-regulated
12	APICAL_JUNCTION_up	0.000665336	0.00163388	0.350535	1.72949	1	194	FBN1, THY1, CERCAM, MMP2, LAYN, MYL9, CLDN11, VCAN, PARD6G, VCL, NEXN, CD99, FLNC, SLIT2, EVL, ARHGEF6, PARVA, VCAM1, INPPL1, GNAI2, CDH6, HRAS, LIMA1, JAM3, ACTN1, CALB2, ITGB1, IRS1, ACTB, TRO, SHC1, DLG1, LAMB3, AMIGO2, NLGN2, ZYX, CD34, IKBKG, MMP9, PCDH1, MYH9, MPZL1, MDK, BMP1, CTNND1, LAMC2, PECAM1	Up-regulated
13	KRAS_SIGNALING_up	0.000666223	0.00163388	0.348761	1.72662	1	198	PRRX1, ITGBL1, INHBA, AKAP12, GYPC, GFPT2, DCBLD2, CPE, EMP1, LY96, SPARCL1, GNG11, LAPTM5, CFH, NRP1, IGFBP3, ANO1, APOD, SPON1, TRIB2, TNFAIP3, ADGRL4, CBL, ETV1, RBP4, F13A1, TMEM158, ADGRA2, SCG5, SPP1, C3AR1, CXCR4, EPB41L3, MAFB, PRDM1, MMP9	Up-regulated
14	IL2_STAT5_SIGNALING_up	0.000666889	0.00163388	0.343552	1.69532	1	195	COL6A1, EMP1, IL1RL1, CKAP4, RHOB, NRP1, ADAM19, SWAP70, GABARAPL1, ITGAV, GLIPR2, PHTF2, PLPP1, GADD45B, IGF1R, SLC2A3, CCR4, CYFIP1, CD48, MAFF, PIM1, ITIH5, LRRC8C, CD83, MYO1E, PLIN2, EOMES, ST3GAL4, SPP1, PRNP, SNX9, SYT11, CD81, TGM2, DENND5A, SOCS2, ECM1, RORA, IRF4, PENK, IL1R2, IL10RA, GPR83, CD44, BHLHE40, BMPR2, IL2RB, AHNAK, SELP, BATF3, LIF, RRAGD, IKZF2, MYO1C, TNFSF11, FAM126B, NFI…	Up-regulated
15	HEDGEHOG_SIGNALING_up	0.0121228	0.0237606	0.449943	1.62356	46	36	THY1, NRP2, CRMP1, NRP1, UNC5C, CDK5R1, MYH9, L1CAM, SCG2, DPYSL2, GLI1, LDB1, AMOT, RTN1, HEY2	Up-regulated
16	INTERFERON_GAMMA_RESPONSE_up	0.00799733	0.0163279	0.283271	1.39987	23	196	TNFAIP6, C1R, C1S, SSPN, CFH, MT2A, TNFAIP3, CCL2, BST2, RSAD2, VCAM1, RIPK1, SOCS3, STAT3, PIM1, STAT4, LATS2, PTPN6, IFIT1, SAMD9L, HIF1A, ZBP1, TNFAIP2, IL6, IRF4, NFKBIA, MVP, IL10RA, MX2, IFI44L, IL2RB, SELP, SP110, CD40, PLA2G4A, CASP4, TAPBP, SOD2, SPPL2A, TXNIP, PTPN1, MX1, PARP14, ARID5B, PDE4B, JAK2, IFITM2, CASP8, CD69, NLRC5, CSF2RB	Up-regulated
18	ESTROGEN_RESPONSE_LATE_up	0.0151364	0.0285262	-0.303379	-1.38646	105	195	IL17RB, MYB, BATF, SORD, PLK4, FRK, TOP2A, CDC6, GINS2, IMPA2, XRCC3, TFF3, TSPAN13, SERPINA1, COX6C, AGR2, NMU, SLC7A5, KLF4, STIL, FABP5, CDC20, KIF20A, HPRT1, CDH1, MAPK13, ST14, GJB3, SLC27A2, AREG, OVOL2, PERP, RBBP8, DHCR7, LSR, CELSR2, WFS1, ASS1, ALDH3A2, SLC16A1, UNC13B, TFAP2C	Down-regulated
19	GLYCOLYSIS_up	0.00257143	0.00572727	-0.326929	-1.49672	17	198	SLC35A3, GOT1, B3GNT3, CDK1, TFF3, MED24, PDK3, PGAM1, NASP, IDH1, AURKA, TXN, GFPT1, ME2, NSDHL, GOT2, KIF20A, PPIA, AKR1A1, STMN1, SOX9, DEPDC1, HAX1, FBP2, ADORA2B, HS6ST2, PAXIP1, DLD, RPE, SRD5A3, ALG1, KIF2A, COG2, CASP6, XYLT2, EGLN3, PRPS1, LCT, GLCE, SAP30, NDUFV3, CHST6, MIOX, PPP2CB, PKP2, SLC25A13, TPI1, SLC37A4, NOL3, EFNA3, GCLC, SOD1, ENO1, ALDH7A1, P4HA1, SDHC, STC2, ALDOB, PFKP, …	Down-regulated
21	FATTY_ACID_METABOLISM_up	0.00102249	0.00238582	-0.363985	-1.61605	6	156	ACAT2, HSPH1, REEP6, ACSL5, IDI1, CCDC58, BCKDHB, ADH1C, FH, ODC1, CBR1, ECH1, CA6, IDH1, ECI1, HSD17B11, PCBD1, NSDHL, HIBCH, GCDH, PPARA, HCCS, ENO3, ACOX1, ACSM3, HSDL2, PDHA1, DLD, HADH, ALDH3A2, APEX1, CPOX, HMGCL, ACAA2, SDHD, CYP1A1, NBN, PTS, CYP4A11, MLYCD, DHCR24, CA4, FASN, HSD17B7, MAOA, HSP90AA1, AUH, ACO2, FABP2, SDHC, SLC22A5, AADAT, FABP1, SUCLA2, HSD17B4, MGLL, RDH11, DECR1	Down-regulated
22	MTORC1_SIGNALING_up	0.000142796	0.000964643	-0.442936	-2.02425	0	195	TMEM97, PLK1, ELOVL6, BUB1, MTHFD2, HSPE1, MTHFD2L, SORD, PSMG1, GOT1, IDI1, QDPR, POLR3G, CCT6A, PPA1, IFRD1, SEC11A, EEF1E1, IDH1, SC5D, PSMB5, AURKA, INSIG1, SLC7A5, TRIB3, UNG, CCNF, TFRC, PPIA, DHFR, HPRT1, SCD, CYP51A1, RRP9, STIP1, HMGCR, PNP, HSPD1, DHCR7, EIF2S2, ARPC5L, CACYBP, SERPINH1, UCHL5, YKT6, EGLN3, PSAT1, LTA4H, CCNG1, HSPA9, CYB5B, PSMD14, DHCR24, NFYC, SSR1, TPI1, SLC37A4, TO…	Down-regulated
23	OXIDATIVE_PHOSPHORYLATION_up	0.000143864	0.000964643	-0.520735	-2.35795	0	183	PRDX3, MRPL11, NDUFAB1, CYCS, NDUFA5, UQCRH, SLC25A3, SDHB, NDUFA6, COX5B, FH, NDUFA4, COX7A2, ECH1, IDH1, TIMM9, COX6C, ECI1, COX11, NDUFA9, GOT2, FXN, VDAC2, NDUFS6, IDH3A, ACADSB, FDX1, CYC1, HCCS, NDUFB2, GRPEL1, COX10, TIMM17A, MRPL34, COX15, LRPPRC, PDHA1, DLD, NDUFA1, NDUFA2, ATP1B1, NDUFV2, PHYH, UQCRQ, COX6B1, ACAA2, UQCRFS1, NDUFB6, ETFB, VDAC3, SDHD, UQCRB, VDAC1, UQCR10, MRPS30, COX6A…	Down-regulated
24	MYC_TARGETS_V2_up	0.000161134	0.000964643	-0.702975	-2.62883	0	57	TMEM97, PLK1, HSPE1, SORD, PA2G4, PLK4, NOLC1, WDR43, DCTPP1, NOP16, RABEPK, UTP20, UNG, SLC29A2, IMP4, MYBBP1A, PHB, TFB2M, AIMP2, NOP56, RRP9, HSPD1, NIP7, GNL3, NDUFAF4, MYC, PES1, GRWD1, RCL1, NPM1, RRP12, FARSA	Down-regulated
25	G2M_CHECKPOINT_up	0.000143947	0.000964643	-0.623617	-2.83288	0	189	CKS2, PTTG1, MKI67, CENPF, PLK1, GSPT1, LBR, TFDP1, TTK, SLC12A2, TPX2, CDKN3, BRCA2, TMPO, BUB1, PRIM2, CCNA2, AURKB, E2F3, KPNA2, PLK4, KIF11, POLQ, AMD1, SRSF2, TOP2A, CDC6, RAD54L, TACC3, KIF15, GINS2, PRC1, KIF23, NOLC1, DBF4, UBE2C, SRSF1, EXO1, CCNT1, EZH2, DKC1, MAD2L1, ORC5, CDK1, FBXO5, CBX1, SLC38A1, ODC1, POLE, CKS1B, TRAIP, SMARCC1, CDC25B, NASP, KIF20B, BARD1, SLC7A1, AURKA, PBK, SL…	Down-regulated
26	E2F_TARGETS_up	0.000142939	0.000964643	-0.642375	-2.93353	0	194	CKS2, PTTG1, MKI67, TRIP13, PLK1, GSPT1, LBR, MELK, EXOSC8, CDKN3, BRCA2, TMPO, E2F8, SLBP, MTHFD2, POLD2, PRIM2, SNRPB, AURKB, RAD51AP1, KPNA2, PA2G4, PLK4, SRSF2, DLGAP5, TOP2A, CDCA8, TACC3, BRCA1, NOLC1, PCNA, SRSF1, EZH2, CSE1L, MAD2L1, DCTPP1, UBE2T, DIAPH3, CDK1, RPA3, ATAD2, NCAPD2, POLE, CKS1B, CDC25B, NASP, BARD1, RANBP1, AURKA, NUP153, UNG, PHF5A, XRCC6, POLD3, SMC3, TFRC, TK1, CDC20, …	Down-regulated
27	MYC_TARGETS_V1_up	0.000142939	0.000964643	-0.685686	-3.13132	0	194	PRDX3, GSPT1, TFDP1, POLD2, HSPE1, CCNA2, RPS5, NDUFAB1, C1QBP, RRM1, SERBP1, KPNA2, PA2G4, FBL, SRSF2, RPS2, RPL18, PSMA2, LSM7, RFC4, GLO1, CCT5, ABCE1, DDX21, NOLC1, PCNA, SLC25A3, RNPS1, SRSF1, MAD2L1, CSTF2, RSL1D1, RUVBL2, PTGES3, IFRD1, ODC1, SNRPD2, CCT4, SMARCC1, NOP16, RANBP1, LSM2, RPL14, XRCC6, GOT2, CDC20, TCP1, EIF1AX, PPIA, TXNL4A, PHB, HPRT1, USP1, CDK2, SRSF7, DEK, RAN, CYC1, TRI…	Down-regulated

## Sheet: H.CT.MU
	pathway	pval	padj	ES	NES	nMoreExtreme	size	leadingEdge	Enrichment
1	EPITHELIAL_MESENCHYMAL_TRANSITION_up	0.000225734	0.000505739	0.7266	3.53946	0	197	LOXL1, LGALS1, BASP1, FBN1, GREM1, ACTA2, SPARC, COL1A2, MMP2, RGS4, CALD1, COL12A1, FSTL1, BGN, NID2, LAMA2, PRRX1, VIM, HTRA1, MXRA5, MYL9, TPM4, THY1, TIMP3, COL6A3, TAGLN, LUM, COL5A1, THBS2, SFRP4, CTHRC1, DCN, FBLN5, SNAI2, ITGA5, COL3A1, SERPINE1, EFEMP2, COL4A1, LOX, GJA1, VEGFC, PMP22, CXCL12, MYLK, P3H1, POSTN, COL11A1, ADAM12, INHBA, SFRP1, GAS1, SGCB, EMP3, TPM1, FERMT2, SPOCK1, COL6A…	Up-regulated
2	COAGULATION_up	0.000222767	0.000505739	0.524803	2.42239	0	138	FBN1, SPARC, ARF4, MMP2, HTRA1, CTSK, TIMP3, GSN, SERPINE1, CPQ, SERPINA1, PECAM1, TIMP1, CFH, PDGFB, THBS1, F3, C1R, CTSB, CSRP1, C1S, LRP1, A2M, C3, CFI, FURIN, RAPGEF3, APOA1, FN1, ANXA1, C9, MBL2, MASP2, COMP, TF, BMP1, OLR1, CTSE, ANG, P2RY1, VWF, S100A1, MMP14, PLAU, MAFF, MMP8, APOC3, ADAM9, RGN, KLF7, LTA4H, C1QA	Up-regulated
3	INFLAMMATORY_RESPONSE_up	0.000226244	0.000505739	0.494093	2.40982	0	199	STAB1, OSMR, ITGA5, SERPINE1, PCDH7, SLAMF1, GABBR1, INHBA, TNFAIP6, EMP3, ABCA1, IL4R, TIMP1, MSR1, F3, PIK3R5, PTGER2, PTPRE, C5AR1, LIF, BST2, FPR1, IL6, AQP9, C3AR1, ACVR2A, CYBB, IL1R1, AXL, IRAK2, HIF1A, CCL5, LPAR1, RNF144B, TPBG, CALCRL, CLEC5A, TNFSF15, GCH1, CD55, CMKLR1, BDKRB1, CD48, IL2RB, KCNA3, AHR, CD82, RGS16, RELA, SCN1B, DCBLD2, PTGIR, SGMS2, TLR1, CCR7, IL1A, CSF1, IL15RA, GPR…	Up-regulated
4	TNFA_SIGNALING_VIA_NFKB_up	0.00022553	0.000505739	0.483255	2.35632	0	198	RCAN1, SERPINE1, PDLIM5, INHBA, SLC2A3, TNFAIP6, KLF9, EGR2, ABCA1, CD83, GFPT2, PLK2, F3, PTPRE, LIF, KYNU, CD44, IL6, IER2, RHOB, CCL5, SGK1, TNIP2, TNFAIP8, BCL3, FUT4, NINJ1, TNC, GCH1, GEM, KDM6B, TANK, ID2, SIK1, BHLHE40, MCL1, FOSL2, CXCL1, PNRC1, RELA, TGIF1, ACKR3, JAG1, IL1A, CSF1, IL15RA, BMP2, GPR183, CCL2, DENND5A, KLF2, CD80, EGR1, OLR1, NFKB1, PTGER4, IER3, MARCKS, NR4A2, ZFP36, GA…	Up-regulated
5	UV_RESPONSE_dn	0.000222816	0.000505739	0.498787	2.30506	0	139	COL1A2, RGS4, RUNX1, FBLN5, SNAI2, COL3A1, SERPINE1, NRP1, GJA1, PMP22, PDLIM5, ADGRL2, COL11A1, EFEMP1, SMAD7, PTPRM, ATXN1, PTPN21, COL1A1, RBPMS, F3, PRKAR2B, SDC2, PIAS3, CAV1, IGFBP5, ACVR2A, KCNMA1, DLC1, AKT3, CDC42BPA, LPAR1, ATRN, MT1E, COL5A2, BHLHE40, NR3C1, ATP2B4, PRDM2, KALRN, NFKB1, CAP2, DBP, HAS2, SIPA1L1, DUSP1, PLPP3, NFIB, BCKDHB, ATP2B1, TJP1, DLG1, LAMC1, TGFBR2, NOTCH2	Up-regulated
6	ANGIOGENESIS_up	0.000216029	0.000505739	0.627312	2.24341	0	36	FGFR1, FSTL1, LUM, COL3A1, NRP1, POSTN, TIMP1, KCNJ8, SPP1, VCAN, APP, ITGAV, COL5A2, JAG1, OLR1, SLCO2A1	Up-regulated
7	MYOGENESIS_up	0.000225734	0.000505739	0.441151	2.14896	0	197	AEBP1, SPARC, LAMA2, PTGIS, COL6A3, TAGLN, MRAS, GSN, COL3A1, COL15A1, MYLK, HSPB8, ADAM12, COX7A1, FST, COL6A2, COL1A1, PDLIM7, SPEG, CNN3, WWTR1, CDH13, AK1, MYBPH, DTNA, GJA5, SSPN, PPP1R3C, CSRP3, HDAC5, APP, SPDEF, GNAO1, SGCD, CRYAB, IGFBP3, BHLHE40, PYGM, ACTA1, PICK1, TNNT1, ADCY9, BDKRB2, SLN, ACSL1, FOXO4, ITGB5, GABARAPL2, KCNH1, TPM2, SGCA, TGFB1, ANKRD2, CACNG1, FHL1, MYOG, FLII, MYH…	Up-regulated
8	COMPLEMENT_up	0.00022553	0.000505739	0.429342	2.09345	0	198	ZEB1, GNAI2, SERPINE1, DOCK10, CPQ, SERPINA1, GNB4, TIMP1, CFH, CTSL, PDGFB, F3, PIK3R5, C1R, GNG2, CTSB, CR2, CDH13, KYNU, CSRP1, C1S, KCNIP3, S100A9, IL6, CTSC, CCL5, GRB2, LRP1, PRCP, C3, S100A12, ZFPM2, CD55, CD59, FN1, CXCL1, WAS, C9, JAK2, ITGAM, CR1, AKAP10, C1QC, CBLB, LTF, FCER1G, KLK1, OLR1, GATA3, ANG, DGKG, F5, MMP13, MMP14, MAFF, MMP8, LYN, ANXA5, PLA2G7, APOBEC3F, ADAM9, LTA4H, C1QA	Up-regulated
9	HYPOXIA_up	0.00022553	0.000505739	0.419523	2.0389	0	193	CSRP2, BGN, COL5A1, TGFB3, AKAP12, DCN, SERPINE1, LOX, SLC2A3, LXN, HDLBP, MT2A, PDGFB, WSB1, F3, SDC2, CXCR4, PAM, CAV1, DTNA, IL6, PPP1R3C, SLC2A5, BNIP3L, GLRX, TPBG, MT1E, IGFBP3, BHLHE40, PYGM, FOSL2, NR3C1, PNRC1, PGM1, NCAN, ACKR3, NDST1, EXT1, B4GALNT2, GCNT2, HEXA, KDELR3, PGM2, IER3, CA12, ZFP36, ADM, ETS1, DUSP1, MAFF, MYH9, CHST3	Up-regulated
10	TGF_BETA_SIGNALING_up	0.000217581	0.000505739	0.515262	2.02054	0	54	ACVR1, SERPINE1, TGFBR1, RAB31, SMAD7, THBS1, WWTR1, LTBP2, ID3, FURIN, HIPK2, ID2, TGIF1, SLC20A1, BMP2, SKI, NOG, SMAD1, CDK9, PPM1A, TGFB1, NCOR2, TJP1, CDKN1C, SKIL, RHOA, JUNB	Up-regulated
11	IL6_JAK_STAT3_SIGNALING_up	0.000218579	0.000505739	0.471489	2.01917	0	87	OSMR, IL3RA, IL17RA, IL4R, PIK3R5, TYK2, CD44, IL6, IL1R1, GRB2, A2M, CXCL1, PLA2G2A, CSF1, IL15RA, IL18R1, TNFRSF12A, STAT3, IL6ST, FAS, TGFB1, IFNAR1, TNFRSF1B, CBL, CSF2RB, SOCS3, CSF2, LTB, CSF3R, REG1A, CD14, CCL7	Up-regulated
12	KRAS_SIGNALING_up	0.00022553	0.000505739	0.407022	1.98461	0	198	PRRX1, GYPC, AKAP12, NRP1, INHBA, ITGBL1, PECAM1, LAPTM5, SCG5, SPARCL1, GFPT2, CFH, ADGRL4, LY96, LIF, ADGRA2, SPP1, CXCR4, ANO1, F13A1, C3AR1, CD37, RBP4, PEG3, SERPINA3, GLRX, GNG11, SEMA3B, GPRC5B, PRKG2, CMKLR1, ID2, IGFBP3, ALDH1A2, CPE, RGS16, PTPRR, SCN1B, DCBLD2, BMP2, ETV1, FCER1G, NR0B2, ITGB2, TLR8, ETS1, ETV5, EPB41L3, IL7R, PDCD1LG2, PLAU, TNFRSF1B, PCP4, CBL, KCNN4, TNNT2, CSF2, FB…	Up-regulated
13	APOPTOSIS_up	0.000221729	0.000505739	0.399056	1.88568	0	158	MMP2, BGN, TIMP3, LUM, DCN, GSN, PLPPR4, DAP, SMAD7, TGFB2, TIMP1, DPYD, ROCK1, CD44, CAV1, PPP2R5B, IL6, AVPR1A, CASP8, RHOB, BNIP3L, APP, LEF1, GCH1, F2R, FEZ1, RHOT2, TXNIP, ANXA1, MCL1, RELA, SLC20A1, IL1A, BMP2, LMNA, NEFH, TNFRSF12A, BCL2L2, CYLD, IER3, GPX1, GADD45A, FAS	Up-regulated
14	APICAL_JUNCTION_up	0.00022604	0.000505739	0.38556	1.87427	0	194	FBN1, MMP2, LAYN, MYL9, THY1, GNAI2, PARVA, PARD6G, NEXN, CD99, PECAM1, CERCAM, SPEG, TNFRSF11B, RRAS, ADAMTS5, CDH11, VCAN, EVL, ACTN1, SHC1, ACTG2, AKT3, FLNC, VCL, MYH10, GNAI1, JAM3, LIMA1, ACTA1, AMIGO2, FSCN1, NLGN3, VCAM1, ZYX, VASP, BMP1, ATP1A3, INPPL1, PTPRC, VWF, YWHAH, CLDN19, SLIT2, MYH9, CD86, TUBG1, TJP1, ITGA3, ADAM9, DLG1, PCDH1, ACTB, CD209, ITGB1, MPZL2, CLDN5, ARPC2, MPZL1, CN…	Up-regulated
15	IL2_STAT5_SIGNALING_up	0.000227066	0.000505739	0.37994	1.84657	0	195	ADAM19, COL6A1, NRP1, IL3RA, SLC2A3, IL4R, CD83, GPR65, PTGER2, LIF, SPP1, CD44, XBP1, IKZF2, ST3GAL4, ECM1, LRRC8C, GLIPR2, RHOB, GABARAPL1, CKAP4, CCR4, ITGAV, SYT11, FURIN, HIPK2, CD48, PHTF2, BHLHE40, TWSG1, AHNAK, IL2RB, AHR, CD81, RGS16, CSF1, CCND3, BMP2, ALCAM, SOCS2, DENND5A, DRC1, IL18R1, CYFIP1, TIAM1, S100A1, SHE, MAFF, MUC1, MYO1E, TNFRSF1B, CD86, CAPN3, GATA1, CSF2, LTB, IRF4, CDKN1…	Up-regulated
16	ALLOGRAFT_REJECTION_up	0.00022553	0.000505739	0.379788	1.84578	0	193	STAB1, THY1, INHBA, KLRD1, TLR6, IL4R, TGFB2, TIMP1, GPR65, FLNA, LIF, SPI1, IL6, ACVR2A, HIF1A, BCAT1, DYRK3, CCL5, BCL3, IL16, PRKCB, CD74, PTPN6, SRGN, CCL11, F2R, CXCR3, HCLS1, IL2RB, WAS, MBL2, JAK2, PRKCG, CCL19, HLA-DOB, TLR1, CSF1, CCND3, HLA-DRA, CCL2, CD80, CCR2, ITGB2, SOCS5, PTPRC, HLA-DMB, APBB1, ETS1, FCGR2B, FAS, TGFB1, GALNT1, IL12A, LYN, CD86, CD40	Up-regulated
17	INTERFERON_GAMMA_RESPONSE_up	0.000452284	0.000963562	0.333721	1.6236	1	196	TNFAIP6, IL4R, CFH, MT2A, FCGR1A, C1R, HLA-DRB1, BST2, FPR1, C1S, IL6, SSPN, CASP8, ITGB7, HIF1A, CCL5, IL18BP, CD74, GCH1, PTPN6, CMKLR1, IFIT1, TXNIP, RAPGEF6, IL2RB, JAK2, RIPK1, IL15RA, BANK1, CIITA, SP110, VCAM1, CCL2, TRIM26, NFKB1, PML, STAT3, P2RY14, HERC6, IFITM2, SPPL2A, NOD1, FAS, NFKBIA, HLA-B, SOD2, SAMD9L, CD86, CD40, CSF2RB, SLC25A28, SOCS3, TNFAIP2, IRF4, PDE4B, LATS2, CDKN1A, RSA…	Up-regulated
18	HEME_METABOLISM_up	0.00654037	0.0133533	0.296736	1.44215	28	193	GYPC, BLVRA, ACKR1, DMTN, RAP1GAP, TAL1, CTSB, PPP2R5B, UCP2, TNRC6B, ACP5, MFHAS1, BNIP3L, AQP3, C3, SIDT2, AGPAT4, ERMAP, PGLS, SEC14L1, UBAC1, TRIM58, MBOAT2, NR3C1, HBBP1, MGST3, CCND3, RHCE, ATG4A, SPTA1, HBB, LRP10, CTSE, LPIN2, DAAM1, ARHGEF12, NNT, SLC7A11, PPOX, KHNYN, GATA1, RAD23A, UROS, ADIPOR1, CA1, HBD, FOXJ2, CA2, TRIM10, BMP2K, ELL2, KAT2B, SLC22A4, MOCOS, HTATIP2, PICALM, KEL, GA…	Up-regulated
19	ESTROGEN_RESPONSE_EARLY_up	0.0156038	0.0305834	0.278705	1.35593	68	196	GJA1, CXCL12, HSPB8, SNX24, FCMR, RAB31, TFF1, MLPH, ELOVL2, CD44, XBP1, THSD4, IGFBP4, SLC24A3, PODXL, DLC1, RPS6KA2, TFF3, AQP3, UGCG, SEMA3B, KCNK15, PAPSS2, TPBG, NBL1, BHLHE40, ABCA3, JAK2, ABHD2, SCNN1A, MPPED2, ADCY9, ITPK1, MAST4, MYOF, RET, OLFML3, TIAM1, CA12, ADCY1, IL6ST, NCOR2, SLC37A1, FLNB, ELOVL5, MREG, MSMB, MUC1, BCL11B, KLK10	Up-regulated
20	KRAS_SIGNALING_dn	0.0263397	0.0483421	0.270012	1.31231	115	195	COPZ2, RYR2, TGFB2, IGFBP2, TSHB, CCDC106, ITIH3, SYNPO, KCNMB1, COL2A1, SGK1, NTF3, WNT16, FGF16, KCNQ2, SHOX2, VPREB1, THNSL2, TFF2, PTPRJ, KCNN1, CD80, SPRR3, INSL5, MEFV, UGT2B17, KLHDC8A, NR4A2, TENM2, ENTPD7, ARPP21, CACNG1	Up-regulated
22	SPERMATOGENESIS_up	0.0266375	0.0483421	-0.302632	-1.36425	145	133	PSMG1, EZH2, TTK, PHKG2, CHRM4, CFTR, PRKAR2A, CCNB2, AURKA, CDK1, TUBA3C, CSNK2A2, BUB1, TNP1, STRBP, GRM8, CDKN3, KIF2C, POMC, CLPB, PCSK4, THEG, AGFG1, COIL, ART3, RFC4, TSSK2, DBF4, TSN, DMC1, ARL4A, NCAPH, DDX4, MAP7, OAZ3, SCG3	Down-regulated
23	MTORC1_SIGNALING_up	0.000178635	0.000505739	-0.375542	-1.79437	0	195	CCT6A, TMEM97, SLC7A5, PSMG1, PLK1, TFRC, EIF2S2, IFRD1, HSPD1, ABCF2, UFM1, NUFIP1, HSPE1, STIP1, AURKA, CACYBP, RRM2, SCD, CCNF, BUB1, YKT6, CYB5B, IDI1, CYP51A1, PPA1, GCLC, AK4, EBP, MTHFD2L, GGA2, GBE1, SC5D, INSIG1, HSPA4, ACLY, HSPA9, ADIPOR2, ACSL3, NUP205, DHCR7, POLR3G, SERPINH1, ACACA, SLC9A3R1, GLA, ARPC5L, COPS5, PPIA, FKBP2, SEC11A, SQSTM1, TCEA1, SQLE, PSMB5, GMPS, STARD4, RRP9	Down-regulated
24	OXIDATIVE_PHOSPHORYLATION_up	0.000180766	0.000505739	-0.406511	-1.91853	0	183	PDP1, AIFM1, IDH3B, NDUFA2, FDX1, COX5B, VDAC1, PDHB, MRPL11, COX6C, TIMM10, NDUFA4, GRPEL1, MTRF1, NDUFA5, CYC1, ATP6V1H, LRPPRC, PDHA1, ECI1, CYCS, MRPL34, HSPA9, SDHD, UQCRB, COX11, PMPCA, MTRR, NDUFB6, NDUFAB1, ATP6V0B, NDUFA6, UQCRQ, NDUFA1, COX7A2, NDUFS2, NDUFS1, NDUFB3, SLC25A3, NDUFB2, COX8A, UQCRH, DLD, ABCB7, IDH3G, COX15, SDHB, OPA1, ACADSB, UQCRC2, CS, MTX2, SDHC, TIMM9, HADHB, SUPV3…	Down-regulated
25	MYC_TARGETS_V2_up	0.000185391	0.000505739	-0.620874	-2.4124	0	57	TMEM97, PLK1, PLK4, MYC, HSPD1, MYBBP1A, HSPE1, UTP20, PA2G4, GNL3, NOLC1, AIMP2, WDR43, NOP56, DCTPP1, NOP16, CBX3, NIP7, RABEPK, TBRG4, GRWD1, IPO4, PES1, LAS1L, SRM, RRP9, NDUFAF4, NOC4L, MRTO4, NPM1, WDR74, IMP4, TFB2M, SUPV3L1	Down-regulated
26	G2M_CHECKPOINT_up	0.00018005	0.000505739	-0.551258	-2.61454	0	189	TPX2, SLC7A5, BRCA2, TFDP1, LBR, PLK1, KIF20B, EZH2, PLK4, PTTG1, MYC, CUL4A, RBL1, DKC1, TTK, ORC5, MKI67, TOP1, UBE2C, CCNB2, KIF11, AURKA, POLQ, TOP2A, CDK1, NOLC1, SRSF1, E2F3, CCNF, E2F1, BUB1, MAD2L1, GINS2, CKS2, SRSF2, GSPT1, CKS1B, SLC38A1, SLC7A1, MYBL2, SYNCRIP, CUL1, CDC6, PRIM2, CDKN3, CCNA2, KIF2C, INCENP, SFPQ, CDC45, CDC25B, TRAIP, DMD, KIF15, FBXO5, AMD1, PTTG3P, PRC1, SMARCC1, L…	Down-regulated
27	E2F_TARGETS_up	0.000179276	0.000505739	-0.612294	-2.92105	0	194	CSE1L, BRCA2, LBR, DIAPH3, SPC25, PLK1, EZH2, PLK4, PTTG1, TFRC, MYC, USP1, RAD51AP1, PRKDC, SMC3, MELK, ATAD2, EXOSC8, MKI67, E2F8, CCNB2, AURKA, PA2G4, LYAR, TOP2A, CDKN2A, CDK1, NOLC1, RRM2, SRSF1, MAD2L1, MXD3, CKS2, SRSF2, GSPT1, NOP56, CKS1B, MYBL2, SYNCRIP, BRCA1, TRIP13, DCTPP1, PRIM2, CDKN3, SNRPB, RPA3, KIF2C, DUT, RFC2, CDC25B, EIF2S1, RFC3, BRMS1L, SSRP1, ZW10, PMS2, NUP153, NUP205, C…	Down-regulated
28	MYC_TARGETS_V1_up	0.000179276	0.000505739	-0.619995	-2.95779	0	194	TFDP1, PSMA7, PTGES3, MYC, USP1, GLO1, EIF2S2, IFRD1, HSPD1, CCT5, SNRPB2, RPS2, TUFM, ABCE1, PSMA2, HSPE1, PA2G4, SNRPA, EXOSC7, GNL3, NOLC1, VDAC1, SRSF1, CCT2, SRSF7, AIMP2, HSP90AB1, MAD2L1, SRSF2, GSPT1, RPS5, NOP56, SYNCRIP, CUL1, SERBP1, DDX21, FBL, NOP16, CCNA2, RSL1D1, NCBP2, DUT, CYC1, PWP1, HDAC2, CCT4, CBX3, HNRNPA2B1, HDGF, CDC45, EIF3J, SNRPD2, PSMD3, SSBP1, TARDBP, EIF2S1, TCP1, TR…	Down-regulated

## Sheet: H.CT.PP
	pathway	pval	padj	ES	NES	nMoreExtreme	size	leadingEdge	Enrichment
1	KRAS_SIGNALING_dn	0.000193386	0.00101428	0.417721	2.11878	0	195	UPK3B, SLC6A3, CCR8, STAG3, GDNF, TSHB, CALCB, IGFBP2, PROP1, FGF22, TLX1, SLC5A5, P2RY4, PDK2, CAMK1D, TGFB2, CCDC106, RYR2, NGB, ENTPD7, MYH7, ATP6V1B1, CAPN9, RIBC2, OXT, HSD11B2, MTHFR, PKP1, SCGB1A1, AKR1B10, MEFV, SPTBN2, SLC30A3, IL5, TCL1A, LYPD3, YBX2, CD207, EDAR, PRODH, TFCP2L1, RYR1, CNTFR, ACTC1, BRDT, IFNG, KCNN1, NR6A1, ITIH3, IRS4, NUDT11, TENM2, SHOX2, FGF16, EGF, NTF3, GP1BA, PD…	Up-regulated
2	INFLAMMATORY_RESPONSE_up	0.0187188	0.0481784	-0.262541	-1.34314	89	199	SRI, IL1R1, TLR1, CCL22, CD55, SELE, LPAR1, SLC31A1, CXCL8, ABI1, IL18, IL10RA, IL1B, GPR183, LYN, TNFAIP6, ROS1, SLC7A1, GPR132, TIMP1, ITGB8, ITGB3, KIF1B, IRF1, ITGA5, P2RX7, CSF3, CSF3R, PCDH7, CMKLR1, PLAUR, ICAM1, CD70, ATP2B1, HIF1A, PTAFR, RNF144B, IFITM1, LAMP3, RGS1, DCBLD2, KLF6, CD14, PIK3R5, CDKN1A, AHR, IFNGR2, C5AR1, LY6E, TLR3, CCL17, CCL2, TAPBP, SGMS2, CCL20, OPRK1, IL4R, EIF2AK…	Down-regulated
3	IL2_STAT5_SIGNALING_up	0.0196647	0.0481784	-0.263326	-1.34325	94	195	ENPP1, SOCS1, COL6A1, SLC2A3, P4HA1, MAPKAPK2, PTH1R, CCR4, GSTO1, LCLAT1, TIAM1, WLS, DCPS, IGF1R, PLSCR1, UMPS, MUC1, IL10RA, CDCP1, SNX14, SMPDL3A, BMPR2, ITGA6, NDRG1, RORA, MAP6, MYO1E, POU2F1, IRF6, NFIL3, GABARAPL1, BCL2L1, TNFRSF21, PLAGL1, SPRY4, LRRC8C, KLF6, SNX9, SLC29A2, AHR, SPP1, IL2RA, NCS1, FAM126B, NCOA3, PDCD2L, SLC39A8, ODC1, UCK2, CCND3, IL4R, BMP2, NRP1, CST7, IFITM3, TTC39B…	Down-regulated
4	ALLOGRAFT_REJECTION_up	0.0171843	0.0467794	-0.269824	-1.37364	82	193	MMP9, SOCS1, IFNAR2, TLR1, BCL10, CCL22, NCK1, UBE2D1, ABI1, IL18, IL1B, BRCA1, NPM1, B2M, PRKCB, GALNT1, LYN, PTPN6, HLA-DMB, TLR6, TIMP1, RPL39, CD2, FCGR2B, CD3E, BCL3, EIF4G3, CCL13, CD47, DYRK3, EIF3J, SOCS5, ICAM1, HIF1A, FLNA, RPL9, THY1, CDKN2A, IL2RA, WAS, IFNGR2, TLR3, RPS3A, CCL2, TAPBP, HLA-DMA, IKBKB, CCND3, CD28, CXCL13, IL4R, EIF5A, SRGN, ITGB2, CCR1, AKT1, PTPRC, ACVR2A, EIF3A, IL…	Down-regulated
5	APICAL_JUNCTION_up	0.0122077	0.035187	-0.273323	-1.39301	58	194	MMP9, RHOF, CDK8, PARVA, WASL, SGCE, CD34, CD209, PTEN, NEXN, ACTA1, MYL12B, YWHAH, SKAP2, MMP2, FBN1, ADAM23, CLDN18, CD274, TIAL1, ITGB4, MVD, ITGB1, PBX2, PFN1, THBS3, TRO, VCAM1, SHC1, ITGA2, CDH11, ACTG1, TSPAN4, AKT3, JAM3, ICAM1, CLDN6, FLNC, PTK2, MYL9, CADM3, DHX16, TJP1, RSU1, THY1, MAPK13, PECAM1, CTNNA1, MAP4K2, CLDN4, MYH9, SYK, ADAM9, AMH, VCAN, VAV2, TSC1, CLDN15, CAP1, ARPC2, PIK3…	Down-regulated
6	MITOTIC_SPINDLE_up	0.0045577	0.0148885	-0.284962	-1.45632	21	197	RHOF, CAPZB, WASL, BRCA2, APC, NCK1, ALMS1, FGD6, NIN, TIAM1, LRPPRC, ANLN, ESPL1, SASS6, TPX2, CD2AP, ABI1, RALBP1, CKAP5, ROCK1, CDC27, EZR, PAFAH1B1, LATS1, CSNK1D, KIF23, PCM1, PALLD, KIF1B, RANBP9, CDK1, STAU1, RFC1, MYO1E, DOCK2, HOOK3, EPB41, ABL1, SMC3, BCL2L11, MARCKS, INCENP, PCNT, FLNA, WASF2, PLK1, MYH9, SYNPO, RASAL2, TUBGCP3, SHROOM1, DST, CNTRL, TSC1, CDC42, TRIO, ARHGEF12, CEP57	Down-regulated
7	GLYCOLYSIS_up	0.00310688	0.0108741	-0.2886	-1.47657	14	198	MDH2, P4HA1, MDH1, SRD5A3, AK4, COG2, EXT1, PYGL, STC1, DEPDC1, TPST1, MERTK, PAM, MXI1, PGAM1, PPFIA4, CXCR4, AKR1A1, SAP30, PPP2CB, HAX1, VLDLR, ENO1, GAL3ST1, COPB2, PKM, GMPPA, CDK1, CTH, B4GALT2, PLOD2, PGM2, HSPA5, KDELR3, B4GALT4, EXT2, GCLC, GOT2, SLC25A13, ME2, DCN, SLC37A4, ALG1, NDUFV3, DSC2, TXN, CHST12, CHPF, VCAN, GYS2, NDST3, BPNT1, B3GAT1, HDLBP, EGLN3, AGL, ALDOA, HS6ST2, HS2ST1,…	Down-regulated
8	UV_RESPONSE_dn	0.00632524	0.019371	-0.306274	-1.48389	30	139	CAV1, SRI, PDGFRB, TGFBR3, DDAH1, SNAI2, GRK5, PLPP3, IGFBP5, PTEN, PTPRM, MRPS31, IGF1R, LPAR1, MIOS, AMPH, ATP2B4, VLDLR, SLC7A1, RBPMS, MT1E, ITGB3, MGLL, TFPI, COL3A1, DUSP1, AKT3, PMP22, ATP2B1, PPARG, TJP1, AGGF1, ANXA2, TGFBR2, NR1D2, RUNX1, PIAS3, SCAF8, VAV2, NRP1, DAB2, ACVR2A, SDC2, MTA1, SYNJ2, FBLN5, CDK13, MGMT, GCNT1, SERPINE1, SIPA1L1, YTHDC1, COL1A2	Down-regulated
9	EPITHELIAL_MESENCHYMAL_TRANSITION_up	0.00290035	0.0108741	-0.291196	-1.48818	13	197	PDGFRB, TGFBR3, SNAI2, FAP, CXCL8, CALU, DPYSL3, MMP2, CD59, FBN1, ECM2, TIMP1, NTM, ITGB1, LUM, ITGB3, NID2, FN1, VCAM1, NNMT, FBLN2, CTHRC1, ITGA5, ITGA2, COL3A1, PLOD2, ANPEP, CDH11, CALD1, FERMT2, CRLF1, BGN, PLAUR, PMP22, COL6A3, SGCG, MMP1, MYL9, FLNA, FBN2, TNFRSF12A, GREM1, DCN, THY1, CXCL12, ELN, SPP1, THBS2, VIM, LGALS1, SFRP4, MXRA5, MGP, CADM1, LOX, MMP3, PCOLCE2, DST, OXTR, VCAN, TIM…	Down-regulated
10	E2F_TARGETS_up	0.000206911	0.00101428	-0.319538	-1.62854	0	194	PTTG1, XPO1, XRCC6, CIT, NCAPD2, DEPDC1, RAD51C, BRCA2, DCLRE1B, WEE1, E2F8, USP1, ATAD2, ESPL1, EZH2, CSE1L, TRA2B, PA2G4, BRCA1, TIPIN, EXOSC8, HMGB2, CKS2, GINS1, DUT, POLE4, CKS1B, RPA2, RPA1, CDK1, POLD3, RFC1, PMS2, PRIM2, RAD51AP1, SPC25, SMC3, RFC2, RAD21, RPA3, UBE2S, POLA2, MELK, AK2, CDK4, HELLS, BRMS1L, CDKN1A, CDKN2A, PLK1, HMGB3, NOLC1, CDKN3, RAN, POP7, CHEK1, TBRG4, MKI67, CENPM, …	Down-regulated
11	APOPTOSIS_up	0.000409333	0.00167144	-0.329238	-1.63303	1	158	CAV1, PDGFRB, TGFBR3, RARA, KRT18, BNIP3L, BCL10, SC5D, PEA15, WEE1, DNM1L, ANXA1, ANKH, TXNIP, IL18, IL1B, MMP2, ROCK1, BRCA1, CASP1, HMGB2, TIMP1, DAP3, ADD1, CD2, LUM, HSPB1, CLU, IRF1, XIAP, EGR3, CTH, PPT1, CASP4, BGN, BCL2L11, BCL2L1, PTK2, DPYD, PAK1, TNFRSF12A, DCN, PPP3R1, CD14, CDKN1A, MCL1, BCL2L10, BCL2L2, TIMP3, SOD2, BTG3, BMP2, DNAJA1, IFITM3, DNAJC3, SLC20A1, JUN, LEF1, CTNNB1, CA…	Down-regulated
12	INTERFERON_GAMMA_RESPONSE_up	0.000206911	0.00101428	-0.333913	-1.70551	0	196	SRI, PELI1, SOCS1, TRAFD1, MT2A, IFNAR2, MX1, PARP12, STAT2, SAMHD1, PLSCR1, PLA2G4A, TXNIP, IL10RA, ISG15, ARID5B, B2M, IFIT1, CASP1, TNFAIP6, PTPN6, UBE2L6, CD274, ST3GAL5, PTGS2, VAMP5, IRF5, P2RY14, NUP93, CMPK2, IRF1, TRIM21, TDRD7, PSMB2, VCAM1, MX2, CASP4, SP110, SLAMF7, CMKLR1, ICAM1, DDX58, HIF1A, PSMB9, FCGR1A, IFIT2, EPSTI1, PSMA3, CDKN1A, BANK1, DDX60, NCOA3, IFI44, SPPL2A, IRF2, LY6E…	Down-regulated
13	INTERFERON_ALPHA_RESPONSE_up	0.000403796	0.00167144	-0.386568	-1.76021	1	94	TRAFD1, MX1, PARP12, STAT2, PLSCR1, TXNIP, ISG15, SAMD9, B2M, CASP1, UBE2L6, CMPK2, IRF1, TRIM21, TDRD7, PARP9, SP110, CD47, TMEM140, LPAR6, PSMB9, IFITM1, LAMP3, IFIT2, EPSTI1, PSMA3, DDX60, CNP, IFI44, IRF2, LY6E, ELF1, IL4R, C1S, NUB1, EIF2AK2, IFITM3, PNPT1, UBA7, PSME2, CD74	Down-regulated
14	UNFOLDED_PROTEIN_RESPONSE_up	0.00020284	0.00101428	-0.407589	-1.89878	0	108	SEC31A, DNAJB9, HERPUD1, ATF4, SEC11A, EIF4A2, NPM1, IFIT1, EXOSC10, CNOT6, EIF4G1, EIF4EBP1, CNOT2, NABP1, CKS1B, EXOSC2, SHC1, ASNS, HSPA5, CNOT4, SSR1, KDELR3, SPCS3, DCP2, EXOSC9, DKC1, HSPA9, HYOU1, CALR, NOLC1, SDAD1, YWHAZ, CCL2, SLC7A5, EEF2, IMP3, ATF6, RPS14, CEBPG, TSPYL2, DNAJC3, FKBP14, STC2, YIF1A, LSM4, PSAT1, GOSR2, SRPRB	Down-regulated
15	ANDROGEN_RESPONSE_up	0.000201939	0.00101428	-0.419897	-1.9187	0	97	CDC14B, PIAS1, SLC38A2, DNAJB9, XRCC6, NGLY1, STEAP4, VAPA, MERTK, TMEM50A, CDK6, KLK2, LMAN1, ANKH, UBE2I, PA2G4, ARID5B, B2M, STK39, XRCC5, HPGD, CENPN, NDRG1, ELL2, IQGAP2, KRT8, TMPRSS2, SPCS3	Down-regulated
16	MTORC1_SIGNALING_up	0.000206996	0.00101428	-0.382082	-1.94902	0	195	STIP1, EEF1E1, PDAP1, CYP51A1, SLC2A3, P4HA1, AK4, STC1, SEC11A, SC5D, IGFBP5, GBE1, PSMC2, CACYBP, GPI, DHFR, CXCR4, CCNG1, SKAP2, RPN1, EIF2S2, PHGDH, VLDLR, HSPE1, CANX, UFM1, ENO1, STARD4, PITPNB, RPA1, ASNS, ADIPOR2, FADS2, CTH, GMPS, CCNF, TCEA1, PLOD2, SQLE, HSPA5, SLC7A11, POLR3G, CD9, SSR1, TOMM40, RIT1, UBE2D3, NFIL3, DHCR7, GCLC, TES, HSPA9, PRDX1, PSMA3, CDKN1A, TMEM97, CALR, SLC37A4,…	Down-regulated
17	G2M_CHECKPOINT_up	0.000206271	0.00101428	-0.413716	-2.09682	0	189	PTTG1, XPO1, ORC5, TFDP1, MEIS2, MT2A, BRCA2, HMGN2, LIG3, CCNT1, SRSF10, ESPL1, EZH2, CUL3, TRA2B, TPX2, CUL1, MEIS1, SFPQ, SAP30, CDC27, HSPA8, STIL, PAFAH1B1, SMARCC1, SLC7A1, POLQ, CKS2, KIF23, FOXN3, CKS1B, RPA2, MTF2, CUL5, HNRNPU, CDK1, BCL3, CDC7, DBF4, RAD23B, CCNF, SQLE, PRIM2, PTTG3P, ABL1, DR1, RAD21, MARCKS, INCENP, UBE2S, POLA2, HIF1A, SS18, DKC1, NCL, CDK4, MNAT1, AMD1, EXO1, RBM14…	Down-regulated
18	PROTEIN_SECRETION_up	0.000202347	0.00101428	-0.46492	-2.11942	0	95	BET1, SEC31A, STAM, KRT18, COG2, AP3S1, VAMP4, TSG101, DNM1L, ARFGAP3, PAM, NAPG, LMAN1, MAPK1, RAB2A, TMED2, SNX2, AP3B1, ERGIC3, COPB2, KIF1B, PPT1, AP2S1, RAB14, SCAMP1, CD63, ATP1A1, CAV2, OCRL, RER1, TMED10, ATP6V1H, STX7, DST, SEC24D, ARF1, YKT6, USO1, TSPAN8, ARFGEF2, EGFR, COPE, GOSR2, VPS4B, CLTC, SEC22B, RPS6KA3, CTSC, RAB5A	Down-regulated
19	MYC_TARGETS_V1_up	0.000206911	0.00101428	-0.429683	-2.1899	0	194	XPO1, TFDP1, UBE2E1, XRCC6, HNRNPR, AP3S1, VDAC3, SERBP1, SSBP1, USP1, TRA2B, VDAC1, DDX18, GNL3, PSMA1, CUL1, RPS2, EIF2S2, PA2G4, NPM1, PPM1G, HSPE1, CANX, UBE2L3, TXNL4A, SET, SMARCC1, ERH, DUT, CCT2, ACP1, HNRNPU, PSMB2, VBP1, PSMB3, RAD23B, RFC4, HDDC2, EIF4H, HNRNPA1, STARD7, SSB, RSL1D1, SRSF7, EIF3J, HSP90AB1, RPL14, PCBP1, RPS3, GLO1, GOT2, UBA2, DHX15, PSMD3, LSM7, APEX1, SNRPB2, CDK4, …	Down-regulated
20	OXIDATIVE_PHOSPHORYLATION_up	0.000206996	0.00101428	-0.435567	-2.19713	0	183	MDH2, MRPL11, GLUD1, MRPL34, NDUFA5, MDH1, TIMM9, ATP6V0B, OGDH, NDUFA4, VDAC3, NDUFB2, ATP6V0C, COX11, UQCR10, MRPS15, ATP6V0E1, UQCRC2, NDUFB6, LRPPRC, MRPS22, NDUFB4, VDAC1, GPI, COX7A2L, POR, UQCRH, ATP6V1E1, ISCU, PDK4, COX5B, SDHB, CYB5R3, DLST, DLAT, COX7C, NDUFV2, HADHA, ISCA1, TIMM50, RHOT1, HCCS, ATP6V1G1, NDUFA1, AFG3L2, ATP6V1C1, UQCRQ, GOT2, COX8A, COX6B1, ABCB7, SUPV3L1, ACAT1, MRPS…	Down-regulated

## Sheet: H.CT.SE
	pathway	pval	padj	ES	NES	nMoreExtreme	size	leadingEdge	Enrichment
4	KRAS_SIGNALING_up	0.00221214	0.00471283	-0.336939	-1.50184	19	198	IL10RA, FCER1G, MMP9, APOD, PECAM1, CLEC4A, IGFBP3, LY96, LAT2, TRIB2, TNFRSF1B, HSD11B1, HBEGF, SDCCAG8, CD37, C3AR1, SPP1, SPARCL1, G0S2, ADGRA2, CXCR4, TNFAIP3, MMP11, PRELID3B, CIDEA, TMEM176A, SLPI, CAB39L, PPBP, ANKH, NIN, PRDM1, ETV5, MALL, AMMECR1, SATB1, DOCK2, ETV1, GYPC, GADD45G, EPHB2, PCSK1N, TRIB1, SNAP25, EPB41L3, LAPTM5, CA2, INHBA, BIRC3, USP12, ANXA10, IL1RL2, NGF, ADAM17, TMEM1…	Down-regulated
5	GLYCOLYSIS_up	0.00165911	0.00387125	-0.339368	-1.51266	14	198	MDH1, CACNA1H, RRAGD, MDH2, SLC16A3, IGFBP3, ALG1, AKR1A1, RPE, ARTN, UGP2, MXI1, NDUFV3, SLC25A13, VCAN, DCN, GMPPA, NASP, GUSB, TPST1, SDC3, CDK1, FUT8, CXCR4, ME2, HS2ST1, GOT2, HAX1, PGAM2, XYLT2, MPI, EXT2, CHST12, AURKA, STMN1, HS6ST2, CTH, AK4, PDK3, SLC35A3, PYGL, SDHC, CHPF, IDH1, GNPDA1, STC1, COG2, RBCK1, VLDLR, HOMER1, DEPDC1, P4HA1, EFNA3, PPFIA4, ALDOA, GOT1, KIF20A, TALDO1, B4GALT1…	Down-regulated
6	MYOGENESIS_up	0.00177207	0.00394688	-0.340738	-1.5174	15	197	CRYAB, CACNA1H, APOD, TAGLN, IGFBP3, PRNP, COL6A3, MRAS, IGFBP7, CLU, CD36, RB1, GADD45B, PDLIM7, MYLK, MYH1, HBEGF, SSPN, DES, MYLPF, CRAT, EIF4A2, ACSL1, PPP1R3C, SVIL, REEP1, IFRD1, PGAM2, TPD52L1, ACTN2, MAPRE3, PLXNB2, BHLHE40, MYH7, FLII, SORBS1, MYH9, SH3BGR, TNNT3, MYL4, MEF2D, KCNH2, CFD, SCD, TPM2, KLF5, ADAM12, COL3A1, ITGB1, PPFIA4, TNNI2, PTP4A3, GPX3, GAA, SH2B1, MYH11, FKBP1B, PFKM…	Down-regulated
7	CHOLESTEROL_HOMEOSTASIS_up	0.00956336	0.0167359	-0.399565	-1.55517	75	73	TMEM97, ALCAM, CLU, MVD, GUSB, LGMN, NFIL3, STARD4, ANXA5, ATF3, SREBF2, SC5D, PDK3, PMVK, ATXN2, MAL2, SCD, HMGCR, STX5, GPX8, EBP, FABP5, CTNNB1, TP53INP1, CPEB2, LPL, PLAUR, CYP51A1, CXCL16, PPARG, FBXO6, ATF5, PLSCR1, TNFRSF12A, SQLE, NSDHL, JAG1, PNRC1, FDPS, GNAI1, S100A11, CD9	Down-regulated
8	NOTCH_SIGNALING_up	0.0164342	0.0259766	-0.471926	-1.56515	118	32	NOTCH3, PSENEN, DLL1, ST3GAL6, APH1A, CUL1, NOTCH2, HEYL, FZD7, PPARD, PRKCA, FZD5, MAML2, CCND1, FZD1, DTX4	Down-regulated
9	IL2_STAT5_SIGNALING_up	0.000665779	0.00171701	-0.352997	-1.57002	5	195	IL10RA, GLIPR2, RRAGD, CSF1, IL2RA, PRKCH, FGL2, NCS1, PRNP, ALCAM, COL6A1, CST7, GADD45B, MXD1, TNFRSF1B, RHOH, GBP4, SOCS1, SPP1, CTLA4, CD86, SLC2A3, NFIL3, TNFRSF8, ENPP1, GPX4, CDC42SE2, MAP3K8, AHNAK, MAP6, PIM1, LRIG1, CDC6, ITGA6, IFNGR1, TLR7, NCOA3, BHLHE40, PNP, CDCP1, WLS, GSTO1, UMPS, CA2, SPRY4, FLT3LG, UCK2, CYFIP1, MYC, SCN9A, DENND5A, P4HA1, KLF6, GPR83, GALM, ANXA4, CAPG, CTSZ, …	Down-regulated
10	REACTIVE_OXYGEN_SPECIES_PATHWAY_up	0.0113907	0.0192464	-0.442714	-1.59316	85	47	MSRA, PRNP, OXSR1, LAMTOR5, GLRX2, GPX4, ABCC1, SCAF4, NDUFA6, SBNO2, PRDX1, SRXN1, MPO, GPX3, TXN, G6PD, JUNB, ATOX1, NDUFS2, SOD2, NDUFB4, TXNRD1, FTL, CAT	Down-regulated
11	PROTEIN_SECRETION_up	0.00391198	0.00766748	-0.394229	-1.59895	31	95	STAM, ABCA1, SCRN1, YIPF6, SSPN, RAB2A, RER1, BNIP3, AP3B1, AP2M1, AP2S1, KRT18, SEC22B, SNAP23, PPT1, SEC31A, AP3S1, CLN5, COG2, RAB5A, VAMP3, RAB14, DNM1L, STX7, MAPK1, SNX2, ARCN1, VAMP4, BET1, SH3GL2, ARFIP1, LMAN1, TSG101, STX16, OCRL, CD63, ADAM10, ATP6V1H, VPS4B, GBF1, EGFR, USO1, ATP1A1, ARFGEF1, RAB9A, SCAMP1, LAMP2, KIF1B, ANP32E, CTSC, ARF1, TMED2, YKT6	Down-regulated
12	UV_RESPONSE_dn	0.000927644	0.00227273	-0.376827	-1.60835	7	139	GRK5, ATP2B4, MGMT, FYN, AKT3, ACVR2A, DUSP1, TGFBR3, KCNMA1, IGFBP5, PLPP3, FBLN5, GCNT1, PIK3CD, ATRN, DLC1, NR3C1, CAV1, COL5A2, ABCC1, PEX14, MRPS31, SERPINE1, COL11A1, FHL2, DDAH1, BHLHE40, INSIG1, PTEN, NOTCH2, LTBP1, VLDLR, MYC, CAP2, PDGFRB, PTPRM, PRDM2, COL3A1, PRKCA, PMP22, SLC7A1, ANXA4, COL1A2, EFEMP1, BMPR1A, SCAF8, NRP1, SYNE1, SRI, YTHDC1, GJA1	Down-regulated
13	ANDROGEN_RESPONSE_up	0.00231256	0.00472148	-0.400673	-1.62891	18	97	HSD17B14, B2M, STEAP4, HPGD, SPCS3, TNFAIP8, XRCC6, PIAS1, UBE2I, ELK4, PA2G4, ANKH, ARID5B, TMPRSS2, KRT19, INSIG1, MYL12A, MAK, ADAMTS1, SCD, KLK2, DBI, HMGCR, PGM3, ELL2, B4GALT1, ACTN1, MAF, VAPA, SGK1, SLC38A2, AKAP12, LMAN1, RRP12, DNAJB9, PDLIM5, CCND1, KLK3, MERTK	Down-regulated
14	INFLAMMATORY_RESPONSE_up	0.000221019	0.000656423	-0.36538	-1.62925	1	199	IL10RA, CCL2, FPR1, RGS1, CSF1, ACVR2A, ABCA1, PTGER4, CXCL9, LCP2, CSF3, MXD1, IL18RAP, TNFRSF1B, LY6E, HBEGF, PCDH7, C5AR1, C3AR1, GPR183, IRF1, TIMP1, NMUR1, CD40, IL15, RIPK2, KCNJ2, SERPINE1, CCR7, CCL5, ABI1, MMP14, OPRK1, GNA15, RTP4, MEFV, CXCL6, PVR, PDPN, ICAM1, NLRP3, MSR1, INHBA, CD70, CD55, P2RX7, MYC, LTA, TLR1, SELE, LAMP3, KLF6, PIK3R5, SLC31A1, GPR132, SLC7A1, BTG2, HIF1A, PTAFR,…	Down-regulated
15	ANGIOGENESIS_up	0.00669856	0.0122054	-0.488549	-1.66309	48	36	FGFR1, VCAN, SPP1, TIMP1, PTK2, COL5A2, S100A4, THBD, LUM, CXCL6, STC1, COL3A1, JAG2, SLCO2A1, NRP1, OLR1, VTN, LPL, POSTN	Down-regulated
16	ADIPOGENESIS_up	0.000110914	0.000403143	-0.380801	-1.69152	0	192	NABP1, AIFM1, MDH2, GPAT4, ABCA1, PREB, CD36, UBQLN1, MYLK, REEP5, DDT, PRDX3, GRPEL1, SSPN, ENPP2, STOM, CRAT, SPARCL1, GPX4, APLP2, CIDEA, PFKFB3, PEX14, CYC1, C3, MCCC1, IFNGR1, CMPK1, CCNG2, SULT1A1, CHUK, HIBCH, AGPAT3, STAT5A, BCL6, COX8A, ETFB, FZD4, ADIG, UBC, SDHC, SORBS1, CD151, LAMA4, IDH1, SDHB, IMMT, QDPR, AK2, UCK1, NDUFA5, IDH3A, PHYH, PTCD3, ALDOA, GPX3, DGAT1, TALDO1, ADIPOQ, CHC…	Down-regulated
17	APOPTOSIS_up	0.000227739	0.000656423	-0.396321	-1.72171	1	158	DPYD, JUN, MGMT, CD38, ANXA1, F2, TGFBR3, CLU, GADD45B, HSPB1, CD2, PEA15, DCN, BGN, IRF1, TIMP1, PTK2, CAV1, VDAC2, SQSTM1, GPX4, DNAJC3, TAP1, ANKH, CASP1, BAX, ATF3, IFNGR1, SATB1, HGF, KRT18, SC5D, CDC25B, GNA15, CTH, PPP3R1, TSPO, PPT1, LUM, DNAJA1, HMGB2, BCL10, GPX1, LEF1, GSTM1, PRF1, RARA, BIRC3, PDGFRB, DNM1L, F2R, CYLD, GPX3, BTG2, PAK1, CDK2, CASP3, DAP3, IL1B, EBP, EGR3, CTNNB1, ADD1…	Down-regulated
18	APICAL_JUNCTION_up	0.000110816	0.000403143	-0.388107	-1.72604	0	194	CLDN18, PTPRC, MDK, TIAL1, ICAM5, MMP9, SIRPA, SLC30A3, PECAM1, MYL9, AKT3, RAC2, CDK8, MYH10, NEXN, FLNC, MVD, ACTB, BAIAP2, VCAN, CRB3, NLGN2, NLGN3, ITGA9, PARVA, ACTG2, ADAM23, CD86, PTK2, PBX2, SDC3, ARHGEF6, CRAT, EVL, CLDN11, CD209, PFN1, ACTN2, CD274, JAM3, SYK, FSCN1, CERCAM, INSIG1, MYH9, PTEN, CAP1, VWF, CD34, RSU1, ICAM1, SYMPK, ZYX, CD99	Down-regulated
20	EPITHELIAL_MESENCHYMAL_TRANSITION_up	0.000110754	0.000403143	-0.390881	-1.7407	0	197	ECM2, JUN, TAGLN, MYL9, IGFBP3, FAP, COL6A3, TGFBR3, SPOCK1, GADD45B, MYLK, THBS2, FBLN5, VCAN, DCN, BGN, SPP1, TIMP1, COL5A2, TNFAIP3, LRRC15, FLNA, CXCL12, IL15, NNMT, ACTA2, DPYSL3, SERPINE1, COLGALT1, MMP14, COL11A1, IL32, COL8A2, TPM1, LUM, CXCL6, PVR, FN1, SDC4, MMP1, NOTCH2, CTHRC1, SLIT3, DKK1, TPM4, INHBA, CALD1, COMP, TPM2, CAP2, PDGFRB, ADAM12, COL3A1, FERMT2, ITGB1, PDLIM4, COL5A3, PM…	Down-regulated
21	COMPLEMENT_up	0.000110607	0.000403143	-0.391154	-1.74349	0	198	FDX1, APOC1, DUSP5, WAS, FCER1G, CTSB, FCN1, CTSD, FYN, PPP4C, PDP1, F2, CLU, CD36, LCP2, C1QC, DOCK9, CSRP1, C1S, SPOCK2, IRF1, LAP3, TIMP1, PLA2G7, LGMN, S100A13, HSPA1A, TNFAIP3, SH2B3, ZEB1, ANXA5, EHD1, PIM1, SERPINE1, GZMA, PFN1, CASP1, C3, CEBPB, S100A12, CCL5, CTSH, ACTN2, MMP14, SIRT6, APOBEC3G, LIPA, ITGAM, AKAP10, GRB2, ITIH1, FN1, CA2, CD55, GZMB, CD46, C1R, PIK3R5, CASP10, CASP3, PRC…	Down-regulated
22	UNFOLDED_PROTEIN_RESPONSE_up	0.000119775	0.000403143	-0.430931	-1.78303	0	108	CCL2, CHAC1, NABP1, PREB, SLC7A5, DCP1A, MTHFD2, SPCS3, NOLC1, HYOU1, HSPA9, SEC11A, EIF4A2, DCP2, DNAJC3, PSAT1, ERN1, CNOT4, BANF1, EIF4EBP1, CEBPB, SPCS1, ATF3, NOP14, EDEM1, YWHAZ, ATP6V0D1, SEC31A, EIF2S1, ATF4, CKS1B, EXOSC1, NHP2, SLC30A5, PDIA6, ZBTB17, ASNS, YIF1A, TSPYL2, SSR1, CALR, DNAJB9, EXOSC2, PDIA5, EXOSC4, SHC1, IMP3, HSPA5, RPS14, HSP90B1, EIF4E, DDIT4	Down-regulated
23	TNFA_SIGNALING_VIA_NFKB_up	0.000110607	0.000403143	-0.411226	-1.83296	0	198	DUSP5, CCL2, DNAJB4, JUN, CSF1, NR4A3, DUSP1, ABCA1, PTGER4, LITAF, CCNL1, GADD45B, PLPP3, REL, MXD1, HBEGF, NFKBIE, TNFAIP8, GPR183, IRF1, SLC2A3, KLF2, NFIL3, G0S2, NFKB2, SQSTM1, TNFAIP3, B4GALT5, PFKFB3, TAP1, RIPK2, MAP3K8, EHD1, SERPINE1, PHLDA2, FOSL1, CEBPB, IL6ST, CCL5, ATF3, STAT5A, BCL6, BHLHE40, CXCL2, RNF19B, CXCL6, SDC4, ICAM1, TRIB1, INHBA, SIK1, MYC, BIRC3, DENND5A, KLF9, KLF6, IF…	Down-regulated
24	MTORC1_SIGNALING_up	0.000110963	0.000403143	-0.413255	-1.83803	0	195	CCT6A, CACYBP, UFM1, FGL2, GGA2, SRD5A1, TMEM97, ARPC5L, IGFBP5, MTHFD2L, SLC7A5, MTHFD2, HSPD1, PLK1, PSMD13, NUPR1, BUB1, CYB5B, MLLT11, HSPA9, SLC2A3, SEC11A, LGMN, NFIL3, TFRC, STIP1, DHFR, SQSTM1, CXCR4, TCEA1, STARD4, IFRD1, PSAT1, TES, POLR3G, HSPA4, CCNF, AURKA, SC5D, TUBA4A, EDEM1, BHLHE40, PNP, CTH, AK4, INSIG1, CFP, PRDX1, NUFIP1, IDH1, STC1, EIF2S2, IMMT, DDX39A, QDPR, RDH11, GMPS, VL…	Down-regulated
25	OXIDATIVE_PHOSPHORYLATION_up	0.000111657	0.000403143	-0.417079	-1.84197	0	183	FDX1, MDH1, AIFM1, MDH2, OAT, PDP1, ISCU, ATP6V1F, GLUD1, ATP6V0B, ATP6V0E1, PRDX3, VDAC1, GRPEL1, MTRF1, POLR2F, HSPA9, MRPL11, VDAC2, ATP6V0C, GPX4, GOT2, TIMM50, NDUFS8, TIMM9, HADHB, NDUFS7, CYC1, BAX, NDUFB6, NDUFA2, TIMM10, NDUFA6, MRPS15, ATP6V1G1, TCIRG1, UQCRC2, UQCRB, COX8A, ETFB, NDUFS6, SDHC, UQCRFS1, IDH1, SDHB, IMMT, SLC25A3, NDUFB3, NDUFA4, PDHA1, NDUFS4, COX6C, NDUFA5, VDAC3, IDH3…	Down-regulated
26	UV_RESPONSE_up	0.000113817	0.000403143	-0.431517	-1.87173	0	155	PDLIM3, BSG, GLS, ATP6V1F, HSPA13, POLE3, DNAJB1, GRPEL1, CREG1, CYB5B, IRF1, TFRC, STIP1, EPHX1, SQSTM1, TAP1, NUP58, DDX21, UROD, IL6ST, ATF3, AP2S1, WIZ, MMP14, SULT1A1, TUBA4A, CLTB, KLHDC3, CXCL2, PRKACA, PPT1, DNAJA1, NTRK3, CYB5R1, ICAM1, HTR7, CDKN2B, MGAT1, CA2, KCNH2, MARK2, FMO1, TMBIM6, FGF18, GRINA, RET, ASNS, HNRNPU, BAK1, ATP6V1C1, SIGMAR1, ALDOA, GPX3, BTG2, GGH, DGAT1, PLCL1, CDK…	Down-regulated
27	IL6_JAK_STAT3_SIGNALING_up	0.000123411	0.000403143	-0.478951	-1.91571	0	87	A2M, JUN, CSF1, IL2RA, CD38, ITGA4, CD36, CXCL9, TNFRSF1B, SOCS1, CCR1, CSF2RB, IRF1, STAT2, HAX1, MAP3K8, PIM1, IL6ST, IFNGR1, CNTFR, GRB2, IL17RB, TNFRSF1A, STAT1, PIK3R5, REG1A, BAK1, ACVRL1, IL1B, CXCL13, IL9R, MYD88, LEPR, CCL7, SOCS3, PDGFC	Down-regulated
28	G2M_CHECKPOINT_up	0.00011147	0.000403143	-0.43545	-1.92818	0	189	TFDP1, STIL, MEIS2, CKS2, RAD54L, PTTG3P, POLQ, DR1, SMARCC1, PTTG1, SLC7A5, PRIM2, TTK, UBE2C, NOLC1, PLK1, NEK2, BUB1, XPO1, NASP, RPA2, RBL1, CDKN3, CDK1, TPX2, ORC5, CHEK1, BRCA2, CDC6, STAG1, BARD1, CCNF, CUL5, KPNA2, CUL1, AURKA, CDC25B, STMN1, TROAP, BIRC5, MEIS1, CCNB2, NOTCH2, EZH2, ESPL1, DDX39A, UCK2, CKS1B, BUB3, MYC, KIF22, FANCC, SFPQ, CDC7, FBXO5, RAD23B, EWSR1, ABL1, HNRNPU, SLC7A…	Down-regulated
29	E2F_TARGETS_up	0.000110816	0.000403143	-0.435118	-1.93511	0	194	CDKN2A, DIAPH3, TRIP13, EXOSC8, CENPM, CKS2, USP1, SMC3, SPC25, PTTG1, ATAD2, PRIM2, SLBP, TCF19, MTHFD2, POLD3, MELK, DCLRE1B, GINS1, TIPIN, NOLC1, PLK1, XRCC6, RFC2, XPO1, NASP, RPA2, DUT, CDKN3, CDK1, TFRC, RFC3, ORC2, SNRPB, CHEK1, BRCA2, PA2G4, TBRG4, STAG1, BARD1, WDR90, DSCC1, KPNA2, PHF5A, AURKA, CDC25B, STMN1, DCTPP1, IPO7, BIRC5, EIF2S1, E2F8, CCNB2, NUP107, HMGB2, EZH2, ESPL1, DDX39A, …	Down-regulated
30	INTERFERON_GAMMA_RESPONSE_up	0.000110889	0.000403143	-0.45782	-2.03766	0	196	IL10RA, HLA-DQA1, CCL2, FPR1, HLA-DMA, CD38, CD74, FGL2, B2M, ISOC1, SECTM1, XCL1, PARP12, CXCL9, LCP2, PSME2, LYSMD2, MTHFD2, NUP93, LATS2, LY6E, VAMP5, HLA-G, GBP4, SOCS1, SSPN, CSF2RB, C1S, SAMHD1, IFNAR2, IRF1, LAP3, CD86, EPSTI1, IDO1, PARP14, STAT2, TNFAIP3, P2RY14, CD40, IL15, TOR1B, TAP1, RIPK2, PSMB2, ZNFX1, PIM1, METTL7B, GZMA, CASP1, CCL5, CD274, UBE2L6, NCOA3, ARID5B, PNP, RTP4, SLAMF…	Down-regulated
31	MYC_TARGETS_V1_up	0.000110816	0.000403143	-0.485686	-2.16	0	194	RUVBL2, TFDP1, SERBP1, USP1, HDDC2, RNPS1, SMARCC1, PTGES3, HSPD1, RPS2, POLE3, CCT7, NOLC1, PRDX3, VDAC1, XRCC6, XPO1, GLO1, DUT, UBE2E1, SNRPA, ORC2, GNL3, HNRNPR, GOT2, CSTF2, IFRD1, PSMB2, DDX21, STARD7, PA2G4, SRSF7, CYC1, LSM2, KPNA2, C1QBP, ACP1, SRM, CUL1, PCBP1, RPL14, TXNL4A, HDGF, PWP1, EXOSC7, HDAC2, AP3S1, SNRPD2, EIF2S1, CAD, PSMA6, SNRPB2, RPS5, SF3A1, SSBP1, EIF2S2, TARDBP, SLC25A…	Down-regulated
32	ALLOGRAFT_REJECTION_up	0.000110939	0.000403143	-0.488024	-2.16866	0	193	HLA-DQA1, CDKN2A, WAS, CCL2, HLA-DRA, PTPRC, MMP9, IGSF6, CSF1, HLA-DMA, IL2RA, CD74, ACVR2A, B2M, HLA-DMB, F2, CD7, CXCL9, LCP2, IL18RAP, CD8A, CD2, IL16, SRGN, HLA-G, TRAT1, GCNT1, RPL3L, SOCS1, CCR1, IFNAR2, CCL13, CD86, TIMP1, CCR5, IL11, GBP2, FLNA, CD40, ITGAL, IL15, CD3G, TAP1, RIPK2, CD96, GZMA, CCL5, ABI1, IFNGR1, IL27RA, UBE2D1, FCGR2B, PRKCB, CFP, BCL10, ICAM1, HLA-DOA, NLRP3, STAT1, N…	Down-regulated

## Sheet: H.CT.TB
	pathway	pval	padj	ES	NES	nMoreExtreme	size	leadingEdge	Enrichment
1	G2M_CHECKPOINT_up	0.000139179	0.000465496	0.628896	2.93035	0	189	FBXO5, MNAT1, MT2A, BUB3, RPA2, RAD23B, EFNA5, HMGN2, NUSAP1, XPO1, TTK, DR1, AURKB, KIF11, SS18, HNRNPD, CDC25B, MEIS2, MKI67, NCL, STMN1, BUB1, KIF23, KMT5A, ATF5, SLC38A1, KIF15, TRA2B, PLK4, SMC2, RAD21, CDK1, HMMR, CHEK1, SLC7A5, CENPF, PRC1, SRSF10, TOP2A, CCNA2, MCM3, ODF2, SAP30, CKS1B, CDC7, NUP50, NDC80, YTHDC1, MTF2, PTTG1, CKS2, KIF20B, EZH2, TNPO2, ILF3, RAD54L, CDC27, CCNT1, AMD1, C…	Up-regulated
2	MYC_TARGETS_V1_up	0.000138427	0.000465496	0.602402	2.81697	0	194	BUB3, PRDX3, RAD23B, PSMA1, RRM1, TXNL4A, LDHA, XPO1, RAN, TCP1, SET, HNRNPD, PGK1, DHX15, RANBP1, PSMC4, COX5A, DDX18, TRA2B, EIF3J, FAM120A, HDAC2, EIF4A1, HNRNPC, YWHAE, VBP1, CCNA2, PSMD14, LSM2, ETF1, NPM1, PCBP1, USP1, ILF2, EIF1AX, EIF4G2, CCT7, CBX3, CDC20, CDK4, UBE2L3, HNRNPR, SSBP1, XRCC6, HNRNPA1, ERH, UBA2, SF3B3, SNRPG, PSMA6, CCT3, NOP16, HPRT1, AP3S1, VDAC1, STARD7, SYNCRIP, MRPS1…	Up-regulated
3	E2F_TARGETS_up	0.000138427	0.000465496	0.576817	2.69733	0	194	RRM2, DLGAP5, RPA2, TUBB, XPO1, HMGB2, RAN, AURKB, CCP110, TIPIN, HNRNPD, PSIP1, CDC25B, SLBP, MKI67, RAD51AP1, MMS22L, STMN1, RANBP1, PRPS1, HELLS, CHEK2, RFC1, PPP1R8, DEPDC1, TRA2B, PAICS, SMC3, E2F8, PLK4, RAD21, CDK1, MELK, HMMR, CHEK1, TUBG1, TOP2A, MCM3, CKS1B, ASF1A, RFC3, POLE4, PTTG1, CKS2, USP1, EZH2, ILF3, CBX5, CDCA8, CDC20, CDK4, CCNB2, EXOSC8, XRCC6, EED, LIG1, MSH2, DSCC1, CDCA3, …	Up-regulated
4	UNFOLDED_PROTEIN_RESPONSE_up	0.000150399	0.000465496	0.613798	2.64019	0	108	SPCS3, CNOT6, HSP90B1, EXOSC9, DDIT4, BAG3, FKBP14, SRPRB, SHC1, EIF4A1, HSPA5, PAIP1, SLC7A5, VEGFA, SEC31A, EIF4G1, EIF4EBP1, CKS1B, DNAJC3, DCP2, NPM1, CEBPG, CNOT2, STC2, EXOSC10, NFYB, SEC11A, SLC30A5, DDX10, CXXC1, EXOSC1, PDIA6, LSM1, BANF1, PARN, KDELR3, PSAT1, HSPA9, IMP3, ERN1, ATF4, ASNS, MTHFD2, EIF2S1, NABP1, YWHAZ, SSR1, HYOU1, CALR, TSPYL2, CNOT4, NOP56, YIF1A, FUS, NOLC1, IFIT1, E…	Up-regulated
5	MTORC1_SIGNALING_up	0.000138198	0.000465496	0.552027	2.58307	0	195	MLLT11, RRM2, SLC7A11, CTSC, EEF1E1, PNP, LDHA, ME1, ARPC5L, HSP90B1, DDIT4, PGK1, CACYBP, BUB1, PSMC4, QDPR, GTF2H1, SLC2A3, DHCR24, ACTR2, ELOVL6, SC5D, IDH1, HSPA5, TCEA1, SLC7A5, RPN1, TUBG1, UBE2D3, PSMD14, PIK3R3, GOT1, ETF1, PITPNB, POLR3G, PLOD2, TPI1, HSPA4, GAPDH, SEC11A, UCHL5, ENO1, DHFR, BHLHE40, HPRT1, IMMT, STIP1, TUBA4A, PRDX1, PGM1, PSMD13, HMBS, HSPD1, USO1, GLRX, PSAT1, CORO1A,…	Up-regulated
6	MITOTIC_SPINDLE_up	0.000137855	0.000465496	0.542799	2.54423	0	197	FBXO5, DLGAP5, ROCK1, GSN, NUSAP1, KLC1, TTK, ARHGAP5, EZR, KIF11, ANLN, CCDC88A, CDC42, BUB1, KIF23, RFC1, KIF15, BCL2L11, SMC3, SASS6, KNTC1, CDK1, YWHAE, CENPF, ARF6, PRC1, TOP2A, PLEKHG2, NET1, NDC80, WASF1, TIAM1, TSC1, KIF20B, STK38L, CDC42BPA, CDC27, ARFIP2, CCNB2, DYNC1H1, ARHGEF3, CTTN, ARHGAP29, NIN, TUBA4A, CDC42EP1, PREX1, SMC4, CSNK1D, SPTBN1, SOS1, KIFAP3, PCM1, RAB3GAP1, RALBP1, MY…	Up-regulated
7	OXIDATIVE_PHOSPHORYLATION_up	0.000140095	0.000465496	0.542265	2.51478	0	183	PRDX3, NDUFB8, LDHA, ACADM, DLST, MRPS30, NDUFV2, COX5A, PDHX, COX10, DLAT, ACAT1, IDH1, GPX4, ATP6V1E1, COX11, ETFA, NDUFS2, TIMM17A, IDH3A, FXN, SLC25A4, HTRA2, SDHB, MFN2, NDUFA5, LDHB, ATP6V1C1, OAT, IMMT, UQCRFS1, NDUFS4, VDAC1, PMPCA, ATP6V0E1, VDAC2, NDUFB4, SLC25A3, MDH1, NNT, GPI, HSPA9, UQCR10, ACAA2, NDUFB5, MRPS22, VDAC3, TIMM8B, NDUFA9, COX7C, COX4I1, SUPV3L1, TCIRG1, GLUD1, LRPPRC, …	Up-regulated
8	PROTEIN_SECRETION_up	0.000152068	0.000465496	0.544259	2.29619	0	95	STX7, SCRN1, CTSC, RAB5A, PAM, DNM1L, TMED10, COPB1, SEC24D, SCAMP1, NAPG, CLTA, AP3B1, SEC31A, TMED2, TMX1, SNX2, LMAN1, MON2, BET1, AP2B1, TOM1L1, VPS45, AP2M1, AP3S1, CLTC, ARFGAP3, RAB22A, USO1, CD63, CAV2, ANP32E, RAB9A, ARCN1, GNAS, TSG101, IGF2R, DST, AP2S1, ABCA1, RAB14, ADAM10, RAB2A, PPT1, COPE, VAMP7, CLCN3, MAPK1, TPD52, SCAMP3, ARF1	Up-regulated
9	TGF_BETA_SIGNALING_up	0.000161499	0.000465496	0.560513	2.14363	0	54	SLC20A1, MAP3K7, IFNGR2, WWTR1, TJP1, FKBP1A, ID2, UBE2D3, TGFB1, TRIM33, SMURF2, SERPINE1, HIPK2, SPTBN1, FURIN, TGIF1, SMAD3, RHOA, JUNB, APC, SMURF1, CDK9, ARID4B, SKIL, PPM1A	Up-regulated
10	APOPTOSIS_up	0.000142491	0.000465496	0.449454	2.04678	0	158	SLC20A1, ROCK1, GSN, TIMP1, HMGB2, CASP4, DNM1L, CD44, CDC25B, BNIP3L, BCL2L11, BCL2L10, SAT1, CFLAR, SC5D, BTG3, PSEN1, GPX4, SOD2, HSPB1, TOP2A, ANXA1, DNAJC3, MCL1, BCL2L2, ETF1, GPX1, TNFRSF12A, DNAJA1, PPP3R1, MADD, IL6, CASP2, IFNGR1, TGFB2, VDAC2, DPYD, CYLD, CASP3, CLU, IGF2R, GSR, ADD1, AVPR1A, TAP1, FDXR, CD14, ENO2, CASP8, PPT1, DAP, DFFA, CD69, FAS, IRF1, IFITM3, PRF1, BCAP31, CCND1, …	Up-regulated
11	TNFA_SIGNALING_VIA_NFKB_up	0.000138007	0.000465496	0.433165	2.03093	0	198	PLK2, TNFSF9, FOSL1, TNFAIP8, F3, NR4A2, CD44, IFNGR2, DUSP4, DUSP5, PTX3, SLC2A3, TNIP2, NFKB1, IER5, SAT1, CFLAR, PNRC1, BTG3, IL6ST, VEGFA, ID2, SOD2, DENND5A, DNAJB4, BIRC2, SGK1, TNFAIP6, MCL1, ATP2B1, PANX1, CLCF1, CCL5, TIPARP, IL6, TRIP10, BHLHE40, CD83, SERPINE1, EHD1, PHLDA1, HES1, NFE2L2, PLAU, EGR2, KYNU, NFIL3, BCL2A1, IRS2, TGIF1, PLPP3, PTGS2, SMAD3, DRAM1, CCL20, TAP1, ABCA1, CCNL…	Up-regulated
12	REACTIVE_OXYGEN_SPECIES_PATHWAY_up	0.000492045	0.00120551	0.530991	1.96963	2	47	PRDX6, GPX4, OXSR1, SOD2, PRNP, NDUFS2, SBNO2, GLRX2, PRDX1, NDUFB4, GLRX, STK25, ERCC2, SRXN1, TXNRD2, PRDX4, EGLN2, GCLM, GSR, JUNB, TXN, PFKP, FTL, NQO1, G6PD, NDUFA6	Up-regulated
13	GLYCOLYSIS_up	0.000138007	0.000465496	0.407115	1.90879	0	198	NT5E, TPBG, LDHA, PAM, ME1, B3GALT6, CD44, DDIT4, P4HA2, PGK1, STMN1, PKM, PRPS1, PSMC4, DEPDC1, ARPP19, CDK1, IDH1, HMMR, GALK2, HSPA5, VEGFA, KIF2A, DSC2, CITED2, GNPDA1, SAP30, MIF, GOT1, PLOD2, STC2, TPI1, PGAM1, IL13RA1, ENO1, FUT8, FBP2, EXT2, HDLBP, EXT1, KDELR3, GLRX, HOMER1, HS6ST2, AGL, GALE, MDH1, CXCR4, CLN6, CHST1, IRS2, EGLN3, PPIA, TALDO1, GYS1, GPC4, PAXIP1, ENO2, P4HA1, MET, MED2…	Up-regulated
14	HYPOXIA_up	0.000138677	0.000465496	0.402995	1.88305	0	193	MT2A, TPBG, MT1E, CSRP2, LDHA, PAM, F3, B3GALT6, DDIT4, BNIP3L, P4HA2, PGK1, HEXA, SLC2A3, CCNG2, GCNT2, PNRC1, HSPA5, VEGFA, CITED2, SAP30, MIF, ERRFI1, WSB1, SLC2A5, STC2, TPI1, GAPDH, PLAC8, TIPARP, IL6, ENO1, BHLHE40, SERPINE1, TGFB3, PLIN2, RBPJ, PGM1, HDLBP, EXT1, KDELR3, GLRX, SRPX, CXCR4, NFIL3, GPI, AMPD3, IRS2, AKAP12, LOX, SIAH2, GYS1, GPC4, ENO2, GBE1, P4HA1, ZFP36, CP	Up-regulated
15	PI3K_AKT_MTOR_SIGNALING_up	0.000151953	0.000465496	0.436284	1.86103	0	103	MAP3K7, HSP90B1, ARPC3, CAB39, MAPK10, ACTR2, CDK1, MAPK9, UBE2D3, PIK3R3, TIAM1, CDK4, HRAS, AP2M1, PFN1, CLTC, RAF1, CXCR4, GSK3B, DAPP1, SMAD2, AKT1, TBK1, ATF1, ACACA, NCK1, TNFRSF1A, CALR, CFL1, RALB, PLCB1, SLC2A1, MAPK8, PRKCB, PRKAG1, PRKAA2, PLA2G12A, RIT1, MAPK1, EIF4E, RIPK1, ARF1, PIKFYVE, MYD88, UBE2N, PTPN11, RPS6KA1	Up-regulated
16	ANDROGEN_RESPONSE_up	0.000153092	0.000465496	0.436765	1.8459	0	97	VAPA, SPCS3, TNFAIP8, ELL2, UBE2I, SEC24D, UBE2J1, DHCR24, SRP19, SAT1, TMEM50A, FKBP5, MYL12A, SGK1, INPP4B, PLPP1, CENPN, LMAN1, XRCC6, ITGAV, NGLY1, SPDEF, ACTN1, GNAI3, MAP7, ACSL3, AKT1, SLC38A2, AKAP12, UAP1, HOMER2, ADAMTS1, GSR, ABCC4, BMPR1B	Up-regulated
17	INTERFERON_GAMMA_RESPONSE_up	0.000137779	0.000465496	0.377768	1.76964	0	196	MT2A, STAT1, PNP, DDX60, CASP4, LY6E, NMI, BST2, NFKB1, GBP4, PSME1, SOD2, CMPK2, TNFAIP6, CFH, ISG15, ZBP1, CCL5, APOL6, LAP3, IL6, SAMHD1, USP18, PNPT1, CXCL9, IFITM2, HIF1A, GZMA, HLA-DRB1, SLAMF7, FPR1, IFNAR2, PSMB2, CASP3, MTHFD2, EIF2AK2, PTGS2, TAP1, TDRD7, PELI1, PSME2, CD86, HLA-DMA, LYSMD2, JAK2, CASP8, CIITA, PLSCR1, CD274, CMKLR1, IL15, PTPN1, HLA-DQA1, CD69, GPR18, PSMB9, FAS, IRF1,…	Up-regulated
18	IL2_STAT5_SIGNALING_up	0.000138198	0.000465496	0.377201	1.76502	0	195	NT5E, SNX14, PNP, AHR, CD44, FAM126B, SPRY4, SLC2A3, GABARAPL1, GBP4, GPX4, PRNP, DENND5A, TIAM1, PLPP1, ST3GAL4, CD81, ITGAV, SNX9, ALCAM, BHLHE40, SMPDL3A, NRP1, IFNGR1, COL6A1, CD83, CDCP1, PLIN2, NCS1, HIPK2, DCPS, PHLDA1, SPRED2, POU2F1, PHTF2, IKZF2, NFIL3, CKAP4, FURIN, CASP3, IGF2R, SPP1, CYFIP1, CDC6, UCK2, RABGAP1L, MAPKAPK2, GLIPR2, GSTO1, P4HA1, S100A1, CD86, CDC42SE2, PLSCR1, PTRH2	Up-regulated
19	HEME_METABOLISM_up	0.000277354	0.000755019	0.369135	1.72483	1	193	SLC7A11, BACH1, TRAK2, ELL2, BNIP3L, P4HA2, MARK3, MFHAS1, TCEA1, BSG, MOCOS, MBOAT2, PICALM, SEC14L1, CLIC2, GLRX5, MOSPD1, PSMD9, CDC27, SDCBP, SLC22A4, HBBP1, HTRA2, FBXO9, HBZ, UROS, ABCG2, CTSB, SLC6A9, ARL2BP, FECH, YPEL5, FTCD, HMBS, NNT, UCP2, TOP1, ASNS, GCLM, RIOK3, TAL1, TNRC6B, DCUN1D1, ACKR1, ADD1, CCDC28A, FBXO7, GYPC, GYPE, LPIN2, AGPAT4, SLC2A1, MINPP1, DAAM1, CLCN3, NARF, MXI1, G…	Up-regulated
20	UV_RESPONSE_up	0.000571755	0.0013341	0.372846	1.69293	3	155	DNAJB1, BCL2L11, BTG3, IL6ST, GAL, BSG, RPN1, SOD2, GLS, POLR2H, PARP2, CHRNA5, CEBPG, AMD1, DNAJA1, SLC25A4, CYB5R1, IL6, ATP6V1C1, AGO2, STIP1, TUBA4A, KCNH2, TMBIM6, STK25, PPAT, EIF2S3, DDX21, STARD3, FURIN, ASNS, E2F5, CASP3, PDAP1, AP2S1, MGAT1, TAP1, GRINA, ENO2, EIF5, APOM, JUNB, NUP58, ALAS1, HNRNPU, PPT1, OLFM1, IRF1, PRPF3, GRPEL1, LYN, PRKCD, MMP14, CCK, COL2A1, CNP, HMOX1, NTRK3, GCH…	Up-regulated
21	ADIPOGENESIS_up	0.000417362	0.00107636	0.355501	1.65913	2	192	PRDX3, APLP2, ACADM, UBQLN1, ME1, QDPR, DRAM2, DLAT, CCNG2, RTN3, REEP5, BAZ2A, ELOVL6, IDH1, GPX4, PPM1B, PTCD3, COQ3, IDH3A, PPP1R15B, G3BP2, SDHB, NDUFA5, IFNGR1, IMMT, CHUK, PLIN2, SCP2, PGM1, AK2, DHRS7, DBT, RNF11, ESYT1, COL15A1, UQCR10, UBC, ACAA2, SOWAHC, UCP2, FZD4, NMT1, NABP1, RIOK3, DHRS7B, GHITM, ABCA1, MRPL15, TALDO1, GBE1, STOM, BCL2L13, ATL2, MAP4K3, YWHAG, PEMT, MCCC1, AGPAT3, G…	Up-regulated
24	COMPLEMENT_up	0.000690036	0.0015369	0.344937	1.61726	4	198	RHOG, TIMP1, CTSC, ME1, F3, CASP4, GNAI2, DUSP5, F5, USP14, HSPA5, PSEN1, KIF2A, CALM1, ANXA5, CFH, C1QA, CCL5, LAP3, SERPINA1, IL6, CTSB, SERPINE1, EHD1, PFN1, PRSS3, APOBEC3G, GMFB, S100A9, KCNIP3, HSPA1A, GZMA, RAF1, USP8, GNAI3, KYNU, DUSP6, PRCP, CASP3, CLU, CTSL, RABIF, DPP4, APOA4, JAK2, PLSCR1, CP, GNB4, MMP12, S100A12, CBLB, PSMB9, GNG2, IRF1, CDA, DGKG, S100A13, FCER1G, PIK3CA, PLA2G7, …	Up-regulated
25	P53_PATHWAY_up	0.00111188	0.00227009	0.337895	1.57596	7	191	PLK2, HSPA4L, HEXIM1, TNFSF9, SLC7A11, CCP110, DDIT4, IER5, SAT1, PTPN14, HINT1, TM4SF1, RAP2B, TGFB1, CD81, HRAS, MAPKAPK3, TPRKB, TM7SF3, LDHB, SP1, DEF6, NOTCH1, EI24, MDM2, PCNA, ZFP36L1, CLCA2, RXRA, CYFIP2, SLC3A2, FBXW7, DRAM1, TAP1, SEC61A1, FDXR, CCNG1, STEAP3, RPS27L, TCN2, RAD51C, TSPYL2, ABAT, SERPINB5, STOM, GLS2, FAS, DNTTIP2, KLK8, PITPNC1, RNF19B, RETSAT, KRT17, TRIAP1, TNNI1, FUC…	Up-regulated
27	EPITHELIAL_MESENCHYMAL_TRANSITION_up	0.00289495	0.00545588	0.321445	1.5067	20	197	NT5E, CTHRC1, TIMP1, TNFRSF11B, CD44, SGCB, LAMA3, PTX3, SAT1, VEGFA, TPM4, ID2, TNFRSF12A, PLOD2, POSTN, BDNF, TGFB1, PMP22, ITGAV, IL6, ITGA5, SERPINE1, MEST, EMP3, TAGLN, LAMC2, CXCL8, ITGB1, FSTL1, EFEMP2, LOXL1, GREM1, CALU, VEGFC, LOX, ANPEP, SPP1, DST, SCG2, PRRX1, THBS2, ENO2, CAP2, COLGALT1, DKK1, IL15, NID2, CDH2, TPM2, FAS, CALD1, FBN1, PRSS2, FUCA1, BASP1, TGM2, PVR, COL3A1, MMP14, AC…	Up-regulated
28	FATTY_ACID_METABOLISM_up	0.00400172	0.00726237	0.331407	1.50602	27	156	HSP90AA1, LDHA, METAP1, ACADM, ME1, DLST, CRYZ, KMT5A, ECI2, DHCR24, GABARAPL1, IDH1, PRDX6, SERINC1, PSME1, MIF, VNN1, PTPRG, ACSL4, FASN, UGDH, PTS, UROS, XIST, AADAT, YWHAH, MDH1, PCBD1, ACAA2, RAP1GDS1, ACSL1, OSTC, ACAT2, ALDH3A2, ERP29, ENO2, BMPR1B, HCCS, ACOT2, GLUL, CCDC58, NBN, HSD17B11, FH, HMGCS1	Up-regulated
29	UV_RESPONSE_dn	0.00905109	0.0158394	0.328477	1.46556	61	139	MT1E, F3, PIAS3, IRS1, TJP1, NFKB1, SCAF8, VAV2, CITED2, MTA1, PIK3R3, ATP2B1, YTHDC1, INPP4B, CDC42BPA, BDNF, PMP22, ADGRL2, BHLHE40, NRP1, SERPINE1, PHF3, RUNX1, ATRX, RXRA, DBP, PLPP3, SMAD3, DLG1, MET, CAP2, NR1D2, PDLIM5, APBB2, CDON, KALRN, ATXN1, NEK7, DYRK1A, CAV1, COL3A1, SLC7A1, AKT3, AGGF1, FYN, PTGFR, MGLL, COL1A1, HAS2, WDR37, GRK5, CDK13, EFEMP1, CACNA1A, SNAI2, SDC2, MAP2K5, BMPR1A…	Up-regulated
32	KRAS_SIGNALING_dn	0.000723066	0.00154044	-0.288845	-1.4917	1	195	P2RX6, ZC2HC1C, SPHK2, HTR1B, RSAD2, LGALS7, AMBN, CAMK1D, TFCP2L1, EFHD1, IL12B, CPA2, HSD11B2, TNNI3, CLPS, CHST2, PNMT, NTF3, EGF, GAMT, ITGB1BP2, CLDN16, DLK2, NOS1, DCC, ATP4A, FGGY, CACNA1F, SLC6A14, GP1BA, CLDN8, KCNE2, GPRC5C, SNCB, SMPX, BRDT, SIDT1, FGFR3, PDCD1, SSTR4, PDK2, KMT2D, IL5, KCNMB1, NPHS1, CALML5, ABCB11, IGFBP2, IDUA, SLC16A7, MSH5, IFI44L, MYH7, UPK3B, MAST3, GP2, SOX10, …	Down-regulated

## Sheet: H.DE.MU
	pathway	pval	padj	ES	NES	nMoreExtreme	size	leadingEdge	Enrichment
1	MYC_TARGETS_V1_up	0.000179598	0.00221669	0.467971	2.29444	0	194	PRDX3, COX5A, SLC25A3, RPL18, ACP1, C1QBP, NDUFAB1, PSMD8, RFC4, PHB2, PSMA2, RPL14, GOT2, HSPE1, RRM1, RPL34, RSL1D1, CCNA2, FBL, RPL22, SET, ODC1, POLD2, EIF1AX, IMPDH2, ERH, VBP1, LSM7, PPIA, TXNL4A, RANBP1, CANX, RPS6, RPS5, XPOT, CLNS1A, KPNA2, SNRPG, NAP1L1, NPM1, RPL6, PCNA, SSB, PSMD14, STARD7, PHB, DEK, APEX1, RPLP0, HPRT1, PA2G4, CCT4, SRSF2, GSPT1, EIF4H, PSMC6, CDK2, YWHAQ, RPS10, RAD…	Up-regulated
2	OXIDATIVE_PHOSPHORYLATION_up	0.000180832	0.00221669	0.458356	2.22874	0	183	PRDX3, UQCRFS1, FH, NDUFV2, MRPL11, COX5A, COX6B1, FXN, IDH3A, SLC25A3, UQCRH, SDHB, COX7C, NDUFAB1, ATP1B1, CYCS, PHB2, NDUFA9, GOT2, TIMM9, VDAC2, NDUFA1, NDUFB2, ACO2, NNT, UQCR10, NDUFA6, NDUFA5, COX7A2, COX6A1, MRPS12, NDUFA3, IDH1, ACADSB, ACAA2, PHYH, COX6C, COX10, MRPS15, NDUFB5, NDUFA7, UQCRC2, UQCRQ, CS, UQCR11, NDUFA4, OAT, NDUFB6, ECH1, MRPS30, POLR2F, SUPV3L1, NDUFB4, IDH2, UQCRB, TI…	Up-regulated
3	G2M_CHECKPOINT_up	0.000181225	0.00221669	0.369583	1.80362	0	189	SLC12A2, SAP30, PRIM2, PBK, DR1, CKS2, TACC3, NASP, SMC2, MKI67, CCNA2, KIF23, ODC1, CHAF1A, CDKN3, AMD1, HMGA1, NUMA1, KPNA2, RAD54L, TTK, ATF5, DBF4, CDC7, RPS6KA5, SRSF2, CENPF, CDC25B, GSPT1, MCM3, CCNT1, TOP2A, NUSAP1, PLK1, KIF15, BARD1, AURKB, HSPA8, KIF22, RAD23B, UCK2, STIL, TRAIP, PTTG1, E2F4, XPO1, FBXO5, BUB1, POLQ, EXO1, CDC27, SNRPD1, MAD2L1, PML, BUB3, CKS1B, PRC1, SMARCC1, CENPA, …	Up-regulated
4	E2F_TARGETS_up	0.000897989	0.00733357	0.331893	1.62726	4	194	NCAPD2, MTHFD2, PRPS1, PRIM2, GINS1, CKS2, TACC3, TRIP13, CDCA8, NASP, RPA3, MKI67, POLD2, SLBP, E2F8, RANBP1, CDKN3, POLD3, HMGA1, PSIP1, KPNA2, DLGAP5, NAP1L1, PCNA, RAD51AP1, DEK, CDKN1A, PA2G4, DEPDC1, UBE2T, SRSF2, CDC25B, GSPT1, MCM3, PPP1R8, TOP2A, PLK1, ASF1B, BARD1, AURKB, KIF22, BRCA1, PAN2, PTTG1, XPO1, DCK, HELLS, RAN, NBN, MAD2L1	Up-regulated
6	TNFA_SIGNALING_VIA_NFKB_up	0.000225479	0.00221669	-0.363956	-1.82894	0	198	MSC, FOSB, GEM, SQSTM1, TIPARP, NR4A3, GADD45B, NFAT5, EGR3, SERPINE1, TUBB2A, JUN, MAFF, TRIB1, LAMB3, EGR2, KLF9, NR4A1, BTG2, TSC22D1, GADD45A, TNFAIP3, SOCS3, DUSP1, EFNA1, EGR1, CCL2, GFPT2, ATF3, SERPINB8, SLC16A6, TNFAIP6, JAG1, DUSP5, TNC, RHOB, JUNB, NFKB2, PMEPA1, STAT5A, MAP2K3, INHBA, SDC4, SMAD3, CEBPD, TNFAIP2, KDM6B, SIK1, SPSB1, F3, PANX1, ZFP36, SGK1, IL6ST, MCL1, PLEK, DNAJB4, P…	Down-regulated
7	EPITHELIAL_MESENCHYMAL_TRANSITION_up	0.000226193	0.00221669	-0.454366	-2.27989	0	197	SLIT3, PLOD2, GEM, FSTL1, MFAP5, GADD45B, HTRA1, SERPINE1, MEST, CDH2, JUN, COMP, LAMA2, PRRX1, VCAN, DAB2, FBN1, CDH6, COL1A1, FLNA, ITGB5, SLC6A8, SCG2, GADD45A, SLIT2, TPM2, TNFAIP3, LOX, COL16A1, PFN2, ECM2, SPARC, ABI3BP, THBS1, SGCD, TNC, RHOB, MGP, CADM1, NTM, GLIPR1, PMEPA1, FN1, SPOCK1, LRP1, INHBA, SDC4, TIMP1, SFRP1, FAP, EDIL3, TGFB1, FERMT2, MMP14, DST, POSTN, PTHLH, LAMC1, CTHRC1, T…	Down-regulated

## Sheet: H.DE.PP
	pathway	pval	padj	ES	NES	nMoreExtreme	size	leadingEdge	Enrichment
1	E2F_TARGETS_up	0.000264201	0.000616469	0.409843	2.01139	0	194	POLD2, AURKB, CKS2, TACC3, DLGAP5, LBR, TRIP13, CDK1, SNRPB, LIG1, KPNA2, PLK4, MAD2L1, MTHFD2, GSPT1, CDCA8, DCK, MYBL2, SUV39H1, TMPO, MELK, SRSF1, UNG, ASF1B, NASP, PCNA, WDR90, PLK1, POLD1, RAD51AP1, TOP2A, CENPE, CHEK2, MKI67, PRKDC, RRM2, DIAPH3, CDC25B, SLBP, CDKN3, ZW10, PA2G4, PRIM2, MCM3, TFRC, RACGAP1, BARD1, SRSF2, TK1, TIMELESS, DEK, PAICS, NUP205, ORC6, NOLC1, CDKN2C, SHMT1, NUP107,…	Up-regulated
2	MYC_TARGETS_V2_up	0.00136178	0.00256643	0.4633	1.84602	5	57	IPO4, TMEM97, FARSA, PLK4, SORD, UNG, IMP4, WDR74, PLK1, BYSL, RRP12, RCL1, EXOSC5, PA2G4, GRWD1, PHB, NOLC1, HK2, NOP16, RRP9, TFB2M, AIMP2, NOP56, HSPD1, HSPE1	Up-regulated
3	MYC_TARGETS_V1_up	0.000528402	0.00107882	0.336894	1.65338	1	194	POLD2, CCT5, CCNA2, PSMA2, KPNA2, CCT4, MAD2L1, GSPT1, CSTF2, EIF1AX, SRSF1, SNRPD1, PRDX3, HNRNPA3, NHP2, C1QBP, PCNA, XPOT, PSMA4, SNRPD2, NCBP2, TUFM, RNPS1, NCBP1, RFC4, PA2G4, RPL18, NDUFAB1, RUVBL2, RPS5, CLNS1A, CDK2, TCP1, SRSF2, CCT3, LSM2, ABCE1, MRPL23, PSMA7, PHB, ILF2, COPS5, DEK, NOLC1, PSMD8, NOP16, RSL1D1, RPS10, PTGES3, RRP9, CTPS1, EIF3B, GLO1, PSMD7, RANBP1, AIMP2, NOP56, SYNCR…	Up-regulated
5	KRAS_SIGNALING_dn	0.0015983	0.00279702	0.317921	1.55893	5	195	TFCP2L1, CALCB, HSD11B2, SLC6A3, IL5, ZNF112, UPK3B, SCGB1A1, TG, GP1BA, RIBC2, FGF22, CCR8, BRDT, FGGY, DLK2, HTR1B, GPR3, IGFBP2, C5, LYPD3, YBX2, KCNN1, MAGIX, MYH7, KRT5, SMPX, NUDT11, PAX3, TLX1, P2RY4, HNF1A, UGT2B17, NR6A1, FGFR3, BARD1, CLDN8, EPHA5, ITIH3, CYP39A1, EGF, MTHFR, GP2, TENM2, SPHK2, SLC25A23, CAMK1D, NRIP2, CPA2, CACNG1, AKR1B10, SOX10, PLAG1, NTF3, IFNG, MYOT, VPS50, ATP6V1…	Up-regulated
6	P53_PATHWAY_up	0.0186705	0.0295115	-0.296758	-1.37022	115	191	TSPYL2, PTPN14, PRMT2, PLK2, SEC61A1, DEF6, ZMAT3, CD81, TM4SF1, EPHX1, TGFB1, CCNK, ZFP36L1, TXNIP, RB1, FGF13, SP1, APAF1, CASP1, TAX1BP3, TRAFD1, PLK3, SOCS1, ABCC5, NUDT15, STOM, S100A4, INHBB, BTG2, OSGIN1, SERPINB5, ISCU, PROCR, JUN, ATF3, ANKRA2, FOS, F2R, PLXNB2, POM121, RNF19B, SLC7A11, BAK1, RAD51C, CDKN1A, CD82, MXD4, MDM2, RPS27L, CDKN2B, ADA, RALGDS, CTSF, S100A10, EPHA2, TCN2, TP63,…	Down-regulated
7	ESTROGEN_RESPONSE_EARLY_up	0.00336108	0.00567906	-0.321058	-1.49033	20	196	IL6ST, NBL1, MYOF, RARA, TIPARP, EGR3, RAB31, CXCL12, TPBG, SNX24, LRIG1, ELOVL5, UGCG, IGF1R, NRIP1, AFF1, KLK10, DLC1, THSD4, SVIL, DEPTOR, GJA1, MAST4, KLF10, SLC24A3, INPP5F, IGFBP4, MUC1, CD44, SLC39A6, NAV2, TSKU, SEC14L2, TIAM1, SIAH2, PDLIM3, ELF1, RASGRP1, GREB1, PODXL, INHBB, FLNB, FARP1, TGM2, PTGES, RBBP8, UNC119, JAK2, ALDH3B1, SLC2A1, FOS	Down-regulated
9	UNFOLDED_PROTEIN_RESPONSE_up	0.00713436	0.0116528	-0.362683	-1.54438	41	108	TSPYL2, SHC1, CNOT2, IFIT1, DNAJB9, EXOSC9, FKBP14, CCL2, NFYB, CNOT4, ATF6, GOSR2, DCP2, SPCS3, SEC31A, EIF4G1, EEF2, KDELR3, YIF1A, ERN1, CNOT6, HSPA5, TUBB2A, EIF4A1, ATF4, CALR, ATF3	Down-regulated
10	HEME_METABOLISM_up	0.000802955	0.00157379	-0.341806	-1.58169	4	193	C3, BNIP3L, GYPC, SDCBP, CLIC2, ADD1, KAT2B, SIDT2, NR3C1, CTSB, MGST3, LPIN2, ACKR1, CDR2, TNRC6B, AGPAT4, RNF19A, BMP2K, ELL2, OSBP2, ARHGEF12, RNF123, MARK3, MOSPD1, EZH1, DAAM1, NEK7, CAT, PICALM, BLVRA, GAPVD1, CDC27, ERMAP, FOXJ2, XPO7, YPEL5, MXI1, DCAF10, FBXO9, RIOK3, BTG2, UCP2, OPTN, NFE2, ADIPOR1, SPTA1, SLC2A1, TRAK2, FECH, CTSE, CAST, PPP2R5B, TFDP2, ISCA1, HBB, SLC7A11, CTNS, NARF,…	Down-regulated
11	INTERFERON_ALPHA_RESPONSE_up	0.000517241	0.00107882	-0.423272	-1.76101	2	94	C1S, SAMD9, MX1, LPAR6, BST2, PLSCR1, SP110, UBA7, IL4R, PARP9, TXNIP, CSF1, CD74, LAMP3, CASP1, ISG15, PSMA3, PARP14, TRAFD1, TMEM140, RSAD2, IFIT2, ELF1, ADAR, EPSTI1, DDX60, UBE2L6, EIF2AK2, LAP3, STAT2, PROCR, IRF1, MVB12A, PARP12, CMPK2, IFI44, IFITM2, LY6E, B2M, IRF2, IFITM1, CASP8	Down-regulated
12	MITOTIC_SPINDLE_up	0.000159898	0.000446917	-0.402873	-1.87127	0	197	APC, PALLD, DST, CCDC88A, BCL2L11, GSN, FLNA, CAPZB, FGD6, HOOK3, NCK1, MYH9, VCL, PREX1, RASAL2, AKAP13, MYO1E, TRIO, CLIP1, SYNPO, WASL, ROCK1, PAFAH1B1, WASF2, PDLIM5, PCM1, MARCKS, CKAP5, PKD2, CDC42, ARL8A, DLG1, CDK5RAP2, NIN, BCR, KIF3C, ARHGEF12, DYNC1H1, ARHGAP29, CSNK1D, SSH2, STK38L, RANBP9, TIAM1, NET1, RHOF, FGD4, CDC27, ARHGEF2, RALBP1, CDC42BPA, ABL1, FLNB, FARP1, MYH10, ABI1, ITSN…	Down-regulated
13	ALLOGRAFT_REJECTION_up	0.000160591	0.000446917	-0.404744	-1.87293	0	193	TIMP1, THY1, INHBA, FLNA, HIF1A, MMP9, NCK1, IFNAR2, AKT1, SOCS5, BCAT1, SPI1, CCL2, SRGN, IFNGR2, TLR6, ACVR2A, HLA-DMB, CD40, GALNT1, FCGR2B, EIF4G3, DYRK3, TGFB1, IL4R, STAB1, UBE2D1, BCL3, CSF1, CD74, LCP2, TLR1, WAS, IGSF6, IL18, IL6, PTPN6, CCL22, PTPRC, MAP3K7, SOCS1, ICAM1, LYN, INHBB, ABI1, IL2RA, ETS1, PRKCB, CD28, JAK2, CTSS, F2R, DEGS1, HLA-DRA, APBB1, CCL13, IL1B, CCR5, SIT1, RPS3A, …	Down-regulated
14	MYOGENESIS_up	0.000159898	0.000446917	-0.407022	-1.89054	0	197	SPARC, COL6A3, LAMA2, CLU, CNN3, TAGLN, COL3A1, COL1A1, SSPN, GSN, PTGIS, AEBP1, IGFBP7, APOD, MYLK, ACTA1, ADAM12, MRAS, MYH9, FXYD1, GNAO1, ITGB1, MEF2D, IGFBP3, CRYAB, FOXO4, COL15A1, MEF2A, SVIL, TGFB1, PDLIM7, WWTR1, DTNA, ACSL1, SGCD, PKIA, GADD45B, RB1, ITGB5, TPM2, NAV2, PPP1R3C, CASQ2, COX7A1, IGF1, COL6A2, GABARAPL2, MYL6B, FLII, PRNP	Down-regulated
15	IL6_JAK_STAT3_SIGNALING_up	0.000173611	0.000446917	-0.466886	-1.915	0	87	IL6ST, A2M, LEPR, PIK3R5, IL1R1, PIM1, OSMR, IFNGR2, TGFB1, STAT3, IL4R, CSF1, STAM2, CD44, PTPN1, MAP3K8, IL6, TNFRSF21, SOCS1, MYD88, IL17RA, TNFRSF12A, IL2RA, TNFRSF1A, GRB2, STAT2, CD14, JUN, IRF1, CD36, BAK1, IL1B, SOCS3, PDGFC	Down-regulated
16	HEDGEHOG_SIGNALING_up	0.00036483	0.000812577	-0.564797	-1.94522	1	36	THY1, NRP2, MYH9, NRP1, CDK6, DPYSL2, CRMP1, LDB1, SCG2, AMOT, UNC5C	Down-regulated
17	KRAS_SIGNALING_up	0.000160308	0.000446917	-0.430576	-1.99983	0	198	DCBLD2, AKAP12, PRRX1, SPARCL1, ITGBL1, LY96, GYPC, INHBA, GNG11, GFPT2, EMP1, ETV1, CXCR4, CPE, PRDM1, APOD, MMP9, ADGRL4, IL10RA, NRP1, ANKH, LAPTM5, SCG5, HSD11B1, CFH, TSPAN7, IGFBP3, TNFAIP3, PTBP2, TOR1AIP2, MTMR10, PECAM1, SPP1, BTBD3, CROT, NIN, LAT2, SPON1, EPB41L3, F13A1, ETV5, CD37, RBP4, TRIB2, MAP3K1, IGF2, ADGRA2, C3AR1, CMKLR1, TMEM176B	Down-regulated
19	INTERFERON_GAMMA_RESPONSE_up	0.000160051	0.000446917	-0.457123	-2.12194	0	196	C1S, TNFAIP6, C1R, VCAM1, SSPN, SAMHD1, HIF1A, IL10RA, IFNAR2, CASP4, MT2A, PELI1, IFIT1, PLA2G4A, MX1, ARID5B, BST2, CFH, PIM1, CCL2, TNFAIP3, CD40, PLSCR1, SP110, SOD2, STAT3, IL4R, SPPL2A, BANK1, RIPK1, MVP, TXNIP, CD74, LCP2, CASP1, SELP, ISG15, ST3GAL5, PSMA3, PARP14, TRAFD1, PTPN1, RSAD2, IL6, IL18BP, IFIT2, PTPN6, LATS2, SRI, CMKLR1, SOCS1, MYD88, ICAM1, VAMP5, MX2, ADAR, PTGS2, EPSTI1, DD…	Down-regulated
20	INFLAMMATORY_RESPONSE_up	0.000160591	0.000446917	-0.45795	-2.12745	0	199	SERPINE1, DCBLD2, TIMP1, TNFAIP6, GPR183, PCDH7, ITGA5, INHBA, PIK3R5, C5AR1, HIF1A, IL1R1, AHR, IL10RA, TPBG, RGS1, CD55, BST2, KLF6, CCL2, OLR1, OSMR, LPAR1, IFNGR2, ACVR2A, MSR1, CD40, EMP3, SGMS2, ABCA1, PDPN, TNFSF15, IL4R, CD70, STAB1, BDKRB1, F3, ITGB8, CSF1, SELE, GABBR1, LCP2, TLR1, LAMP3, AXL, GPR132, IL18, P2RX7, IL6, SRI, CCL22, C3AR1, CMKLR1, EDN1, RASGRP1, ICAM1, CCL17, LYN, KCNA3, …	Down-regulated
21	PROTEIN_SECRETION_up	0.000172206	0.000446917	-0.523561	-2.18161	0	95	SEC24D, PAM, DST, SSPN, AP3B1, PPT1, BET1, CTSC, TMED10, MON2, SNX2, RAB5A, LMAN1, ARFGAP3, GOSR2, ABCA1, COPB2, VAMP4, STX7, CD63, MAPK1, SCRN1, RAB2A, SCAMP1, TSG101, ARCN1, SEC31A, NAPG, CAV2, VPS45, AP2M1, GNAS, TMED2, AP3S1, AP2S1, COG2, RPS6KA3, USO1, RAB14, IGF2R, EGFR, ARFGEF2, ARF1, CLTC, SNAP23, VAMP7	Down-regulated
22	ANDROGEN_RESPONSE_up	0.000170853	0.000446917	-0.524837	-2.19513	0	97	AKAP12, SEC24D, STEAP4, BMPR1B, VAPA, ADAMTS1, TNFAIP8, MAF, IQGAP2, ELOVL5, ANKH, AKT1, HOMER2, CDK6, PIAS1, DNAJB9, ARID5B, SGK1, ITGAV, SLC38A2, LMAN1, PDLIM5, NGLY1, ELL2, TMEM50A, UBE2J1, SPCS3, PLPP1, CDC14B, MAK, MERTK, MYL12A, SRF, ZMIZ1, FADS1, PGM3, ACTN1	Down-regulated
23	COMPLEMENT_up	0.000160308	0.000446917	-0.474271	-2.20278	0	198	SERPINE1, ANXA5, TIMP1, CLU, C1S, C3, FN1, C1R, ZEB1, PIK3R5, PRCP, CPM, CBLB, LRP1, CD59, GNB4, CASP4, APOC1, CTSC, LIPA, GNAI2, GNG2, DUSP5, CTSB, PLA2G4A, CD55, CFH, CSRP1, PIM1, OLR1, S100A13, TNFAIP3, CPQ, GNB2, PLSCR1, ATOX1, PLEK, F3, DOCK10, LCP2, CASP1, MT3, PIK3CA, WAS, IL6, KYNU, ZFPM2, APOA4, F8, RASGRP1, HSPA5, LYN, CASP10, GRB2, LAP3, ITIH1, JAK2, IRF1, SERPING1, CTSS, LGMN, CTSO, C…	Down-regulated
24	APICAL_JUNCTION_up	0.000160849	0.000446917	-0.489272	-2.26512	0	194	MMP2, FBN1, THY1, NEXN, MYL9, VCAN, CD34, VCAM1, JAM3, PARVA, TRO, AKT3, EVL, MMP9, ACTA1, MYH9, LAYN, VCL, PARD6G, LIMA1, GNAI2, FLNC, SHC1, CD209, TJP1, CDH11, ITGB1, CLDN11, WASL, CERCAM, MPZL1, CD99, SLIT2, RSU1, ACTB, PECAM1, ARPC2, SKAP2, ARHGEF6, ADAM23, LAMC2, ACTG1, DLG1, SGCE, MYL12B, ZYX, IRS1, GNAI1, YWHAH, PBX2, INPPL1, TIAL1, PTPRC, RHOF, ICAM1, MDK, CDH4, VAV2, MYH10, ACTN1	Down-regulated
25	TGF_BETA_SIGNALING_up	0.000179019	0.000446917	-0.604978	-2.26755	0	54	SERPINE1, APC, ACVR1, THBS1, SKIL, RAB31, CDK9, TGFBR1, TJP1, SKI, SMURF1, BMPR2, IFNGR2, PPM1A, TGFB1, WWTR1, KLF10, UBE2D3, SMAD3, MAP3K7, ID3, TGIF1, BCAR3, SLC20A1, FKBP1A, JUNB, ARID4B	Down-regulated
26	HYPOXIA_up	0.000160591	0.000446917	-0.496985	-2.29977	0	193	SERPINE1, LOX, AKAP12, DCN, BGN, COL5A1, TGFB3, PAM, CSRP2, BNIP3L, TIPARP, CAV1, ACKR3, DUSP1, TMEM45A, CXCR4, LXN, SLC2A3, IDS, HDLBP, TPBG, PNRC1, MYH9, NFIL3, MT2A, SDC2, NR3C1, WSB1, EXT1, KLHL24, PIM1, KLF6, CHST3, IGFBP3, NDST2, TNFAIP3, RORA, ZFP36, ERRFI1, ANXA2, P4HA1, DTNA, F3, SLC2A5, CITED2, CCNG2, RBPJ, PFKFB3, PLIN2, TES, PPP1R3C, KDELR3, SIAH2, MAP3K1, IL6, KLF7, HSPA5, S100A4, MX…	Down-regulated
27	IL2_STAT5_SIGNALING_up	0.000160051	0.000446917	-0.496532	-2.30294	0	195	COL6A1, GABARAPL1, EMP1, SNX9, MAPKAPK2, SLC2A3, NCS1, AHR, IL10RA, LRIG1, NFIL3, NRP1, WLS, PHTF2, DENND5A, CCR4, IGF1R, MYO1E, BMPR2, PIM1, ENPP1, RHOB, KLF6, LRRC8C, RORA, ITGAV, PLSCR1, CD81, DCPS, IL4R, SPP1, P4HA1, SNX14, PLAGL1, MAP6, F2RL2, PLEC, CSF1, GADD45B, PLPP1, IL1RL1, SOCS2, MUC1, CD44, SELP, PLIN2, PTH1R, CTSZ, GALM, SYT11, MAP3K8, TIAM1, SWAP70, CYFIP1, TNFRSF21, SOCS1, POU2F1, …	Down-regulated
28	COAGULATION_up	0.000166251	0.000446917	-0.539137	-2.37542	0	138	MMP2, SERPINE1, ANXA1, CTSK, FBN1, SPARC, TIMP1, CLU, C1S, C3, A2M, FN1, C1R, HTRA1, THBS1, GSN, TIMP3, ARF4, LRP1, MMP7, MMP9, APOC1, CTSB, CFH, CSRP1, OLR1, S100A13, CPQ, GNB2, USP11, CFI, CAPN2, PECAM1, PLEK, F3, F2RL2	Down-regulated
29	APOPTOSIS_up	0.000164285	0.000446917	-0.548394	-2.47194	0	158	MMP2, LUM, ANXA1, TIMP1, DCN, BGN, CLU, RARA, BNIP3L, DPYD, CAV1, BCL2L11, EMP1, GSN, EGR3, TIMP3, PDGFRB, PPT1, ADD1, LEF1, PLPPR4, CASP4, ANKH, MCL1, RHOB, PEA15, ROCK1, HSPB1, DAP, SOD2, TGFBR3, TXNIP, FEZ1, BCL2L2, GADD45B, HGF, CD44, MGMT, CASP1, CYLD, BTG3, IL18, IL6, CREBBP, MADD, TNFRSF12A, WEE1, IGFBP6, BCL2L1, SLC20A1, BTG2, CD14, JUN, ATF3, AVPR1A, IRF1, GPX3, F2R, CTH, GPX1, PPP2R5B, …	Down-regulated
30	UV_RESPONSE_dn	0.000166362	0.000446917	-0.60038	-2.64669	0	139	SERPINE1, PTPRM, SNAI2, DAB2, PMP22, IGFBP5, COL1A2, PLPP3, CAV1, COL3A1, COL1A1, RUNX1, PIAS3, DUSP1, FBLN5, RBPMS, ATP2B4, RGS4, PDGFRB, AKT3, EFEMP1, NRP1, SDC2, NR3C1, TJP1, IGF1R, LPAR1, COL11A1, ACVR2A, TGFBR2, DLC1, PDLIM5, KALRN, ANXA2, TGFBR3, ADGRL2, CELF2, F3, GJA1, DLG1, CITED2, IRS1, LTBP1, MGMT, NEK7, SMAD3, AMPH, APBB2, SRI, ZMIZ1, ATXN1, CDC42BPA, GRK5, MTA1, VAV2, MIOS, CDON, CAP…	Down-regulated
31	TNFA_SIGNALING_VIA_NFKB_up	0.000160308	0.000446917	-0.583302	-2.70918	0	198	SERPINE1, IL6ST, KLF9, TNFAIP6, GPR183, NR4A3, SIK1, PLPP3, TIPARP, INHBA, GFPT2, ACKR3, RCAN1, DUSP1, EGR3, PLK2, SLC2A3, DNAJB4, TNFAIP8, PNRC1, NFIL3, NR4A1, DENND5A, DUSP5, MCL1, EGR1, SGK1, RHOB, KLF6, SERPINB8, CCL2, FOSB, OLR1, NFAT5, EGR2, IFNGR2, TNFAIP3, ZFP36, PDLIM5, GEM, DUSP4, MARCKS, ABCA1, SOD2, PLEK, BIRC2, PANX1, F3, BCL2A1, BCL3, CSF1, GADD45B, TNC, KLF10, CD44, PFKFB3, REL, BT…	Down-regulated
32	EPITHELIAL_MESENCHYMAL_TRANSITION_up	0.000159898	0.000446917	-0.747395	-3.47151	0	197	MMP2, LUM, SERPINE1, CTHRC1, FBN1, LOX, SPARC, COL6A3, LGALS1, LAMA2, LOXL1, TIMP1, SFRP4, DCN, CALD1, THY1, VIM, NID2, MXRA5, PRRX1, BGN, SNAI2, COL5A1, FERMT2, BASP1, FAP, COL12A1, FN1, DAB2, PMP22, SLIT3, THBS2, POSTN, TAGLN, MYL9, GREM1, COL1A2, ACTA2, CDH2, VCAN, COL3A1, DST, MGP, ITGA5, INHBA, PLOD2, HTRA1, FSTL1, COL1A1, VCAM1, THBS1, CALU, SPOCK1, VEGFC, FBLN5, TIMP3, RGS4, NTM, FLNA, PDG…	Down-regulated

## Sheet: H.DE.SE
	pathway	pval	padj	ES	NES	nMoreExtreme	size	leadingEdge	Enrichment
1	MYC_TARGETS_V1_up	0.000323729	0.000689684	0.615235	3.02487	0	194	HSPE1, GSPT1, C1QBP, SRSF2, PCNA, PSMA2, CCNA2, EIF1AX, NDUFAB1, RSL1D1, RFC4, PRDX3, POLD2, RRM1, RPL18, MAD2L1, CCT5, FBL, PSMD14, RPS5, VBP1, ODC1, NOP56, COX5A, PA2G4, NCBP2, RPLP0, SNRPG, MCM2, ABCE1, SNRPD1, RANBP1, CCT4, NAP1L1, ILF2, CBX3, EIF2S2, RPL22, PTGES3, GLO1, KPNA2, HPRT1, PPIA, PSMD7, RPL6, AIMP2, PGK1, CDC20, PSMA4, PHB, SNRPD2, RPS6, PSMA7, TFDP1, RRP9, APEX1, NOLC1, RPL34, DE…	Up-regulated
2	E2F_TARGETS_up	0.000323729	0.000689684	0.598508	2.94263	0	194	GSPT1, CDCA8, TRIP13, SRSF2, PLK1, NCAPD2, PCNA, PLK4, RPA3, CDKN3, PRPS1, RAD51AP1, POLD2, BRCA2, BRCA1, MAD2L1, MKI67, PTTG1, TMPO, GINS1, TOP2A, PRIM2, MELK, UBE2T, ASF1B, CKS2, SNRPB, NOP56, POLE, PA2G4, NBN, MCM2, KIF2C, RAD51C, DLGAP5, MYBL2, RANBP1, ZW10, NAP1L1, CSE1L, CCNB2, KPNA2, HELLS, LBR, MCM3, MTHFD2, NUP153, E2F8, CDC20, HMGB3, SLBP, DEPDC1, TIPIN, CDK1, EZH2, NOLC1, DEK, DCK, DCT…	Up-regulated
3	G2M_CHECKPOINT_up	0.000318269	0.000689684	0.537446	2.63668	0	189	GSPT1, SLC12A2, AMD1, PBK, KIF15, CENPF, SRSF2, PLK1, EXO1, KIF20B, PLK4, CCNA2, CDKN3, BRCA2, MAD2L1, TTK, CCNT1, MKI67, KIF23, PRC1, PTTG1, TMPO, DKC1, TOP2A, PRIM2, CKS2, KIF11, ODC1, TRAIP, DBF4, CBX1, TPX2, POLE, CHAF1A, SMC2, CDC6, MCM2, KIF2C, E2F3, KIF5B, FBXO5, MYBL2, SNRPD1, CCNB2, BUB1, KPNA2, LBR, MCM3, POLQ, CDC20, HMGB3, GINS2, E2F1, TFDP1, CDK1, EZH2, NOLC1, POLA2, TACC3, NUSAP1, K…	Up-regulated
4	MYC_TARGETS_V2_up	0.000255167	0.000658063	0.610884	2.44115	0	57	HSPE1, WDR43, PLK1, TFB2M, PLK4, TMEM97, SORD, IMP4, NDUFAF4, NOP56, PA2G4, CBX3, SLC29A2, AIMP2, RABEPK, PHB, UTP20, RRP9, NOLC1, NPM1, DCTPP1, NOP16, UNG, SUPV3L1, SLC19A1, PRMT3, BYSL, PUS1, EXOSC5, MYBBP1A, GNL3, MYC	Up-regulated
5	OXIDATIVE_PHOSPHORYLATION_up	0.000316957	0.000689684	0.441974	2.15928	0	183	CYCS, FXN, NDUFAB1, COX5B, ABCB7, FH, PRDX3, ACADSB, NDUFV2, ECH1, MRPL11, UQCRQ, COX7A2, ACAA2, ATP1B1, DLAT, COX10, NDUFA5, UQCRH, COX11, COX5A, DLD, NDUFB2, TIMM9, HCCS, COX6B1, NDUFA7, NDUFA1, COX17, NDUFA4, IDH1, NDUFA6, NDUFB5, NDUFB3, LRPPRC, MRPS22, SLC25A3, NDUFA9, COX6C, MRPS12, COX7C, COX7A2L, COX6A1, COX7B, DECR1, PDHA1, UQCRC1, UQCRB, OGDH, GRPEL1, CS, SDHB, SUPV3L1, NDUFB1, CYC1, ND…	Up-regulated
6	MTORC1_SIGNALING_up	0.00129157	0.00253148	0.324749	1.59688	3	195	HSPE1, PLK1, TMEM97, SORD, PSMG1, EEF1E1, ELOVL6, PSMD14, TRIB3, ADD3, POLR3G, CCT6A, MCM2, GOT1, EIF2S2, BUB1, IDI1, HPRT1, PPIA, LTA4H, MTHFD2, PGK1, IDH1, PSMA4, CCNG1, GAPDH, SEC11A, RRP9, HMBS, TBK1, NFYC, ACACA, TM7SF2, GTF2H1, TOMM40, SLC37A4, DHFR, MTHFD2L, ME1, TPI1, DHCR7, PSMB5, AURKA, PNO1, UNG, ARPC5L, DHCR24, HMGCR, PPA1, EGLN3, VLDLR, YKT6, RRM2, ENO1	Up-regulated
7	MITOTIC_SPINDLE_up	0.023112	0.040446	0.264236	1.30069	70	197	KIF15, CENPF, TLK1, PLK1, KIF20B, RAPGEF5, BRCA2, UXT, TTK, KIF23, PRC1, ANLN, TOP2A, GEMIN4, SASS6, KIF11, TPX2, ARF6, MID1IP1, CEP57, NF1, KIF2C, RAPGEF6, DLGAP5, KIF5B, FBXO5, CCNB2, BUB1, EPB41L2, DYNLL2, BCR, EPB41, KNTC1, SORBS2, LRPPRC, CDK1, CD2AP, LATS1, NUSAP1, KIF4A	Up-regulated
8	ESTROGEN_RESPONSE_EARLY_up	0.0197977	0.0359291	-0.302592	-1.36775	136	196	RAB31, MYOF, UGCG, INPP5F, NBL1, PDLIM3, DLC1, RASGRP1, EGR3, THSD4, CXCL12, FLNB, GJA1, NRIP1, RHOD, KLK10, IL6ST, SVIL, ELOVL5, ZNF185, CALB2, TPBG, NAV2, SLC24A3, RARA, OLFML3, LRIG1, SYNGR1, TGM2, KRT19, ABCA3, BCL11B, DEPTOR, PODXL, IGFBP4, DHRS3, SNX24, FOXC1, DHRS2, BHLHE40, PTGES, SEC14L2, IGF1R, AR, GREB1, TSKU, MAPT	Down-regulated
9	P53_PATHWAY_up	0.00145624	0.00274445	-0.341821	-1.53683	9	191	PTPN14, EPHX1, TSPYL2, PRMT2, CDKN2B, NUPR1, F2R, PLK3, CTSD, CSRNP2, ZMAT3, TP63, STOM, RXRA, JUN, ZFP36L1, BTG2, RAP2B, SEC61A1, SERTAD3, HRAS, TXNIP, CD81, TCN2, TM7SF3, PLK2, GADD45A, FGF13, TGFB1, STEAP3, ATF3, PROCR, ISCU, ALOX15B, NUDT15, ABCC5, DEF6, TSC22D1, AK1, CDK5R1, CDKN2A, RB1, CD82, S100A4, RNF19B, TAX1BP3, RGS16, KRT17, NINJ1, PPM1D, RRP8, FOS, RHBDF2, SOCS1, PDGFA, AEN, OSGIN1, …	Down-regulated
10	INTERFERON_ALPHA_RESPONSE_up	0.000157134	0.000461863	-0.447611	-1.81918	0	94	C1S, CSF1, CD74, LPAR6, BST2, UBA7, EPSTI1, ADAR, TXNIP, SAMD9, LAMP3, PARP9, SAMD9L, HLA-C, RSAD2, LY6E, PROCR, PARP14, SP110, GMPR, ISG15, IFI44L, CCRL2, IFIT2, MX1, TMEM140, STAT2, RTP4, IRF1, IL15, UBE2L6, TRIM14, GBP2, NMI, IFITM2, IL4R, CMPK2, OGFR	Down-regulated
11	HEDGEHOG_SIGNALING_up	0.00084832	0.00173199	-0.545528	-1.84141	4	36	NRP2, NRP1, CRMP1, LDB1, THY1, MYH9, UNC5C, CNTFR, HEY1, DPYSL2, SCG2, ACHE, CDK5R1, L1CAM	Down-regulated
12	IL6_JAK_STAT3_SIGNALING_up	0.000158103	0.000461863	-0.464747	-1.86399	0	87	PIK3R5, A2M, CSF1, SOCS3, OSMR, CSF2RB, PIM1, IL1R1, JUN, IL6ST, CD36, IL2RA, MAP3K8, IFNGR1, GRB2, CNTFR, TGFB1, MYD88, LEPR, STAT3, CD14, CBL, PDGFC, TNFRSF1B, IFNGR2, IL6, PTPN1, IL10RB, CCL7, CD44, SOCS1, ITGA4, STAT2, IFNAR1, IRF1	Down-regulated
13	TGF_BETA_SIGNALING_up	0.000165399	0.000461863	-0.552938	-2.02782	0	54	THBS1, RAB31, SERPINE1, LTBP2, WWTR1, SKI, ACVR1, BCAR3, SKIL, SMAD7, APC, BMPR2, CDK9, NOG, PMEPA1, MAP3K7, JUNB, TGFB1, SMURF1, IFNGR2, FURIN, TGFBR1, TGIF1, ARID4B, SMAD3, SMAD1, NCOR2	Down-regulated
14	KRAS_SIGNALING_up	0.000144342	0.000461863	-0.459971	-2.08172	0	198	LY96, ITGBL1, INHBA, APOD, PRRX1, GFPT2, IL10RA, TRIB2, AKAP12, EPB41L3, NRP1, IGFBP3, SPARCL1, ETV1, C3AR1, GYPC, LAPTM5, CXCR4, SPP1, CFH, ADGRL4, MMP9, DCBLD2, ADGRA2, GNG11, PECAM1, SPON1, TNFAIP3, CPE, EMP1, FCER1G, MAFB, IKZF1, PRDM1, ANO1, SDCCAG8, MAP4K1, CROT, PPBP, HSD11B1, F13A1, ETS1, PEG3, LAT2, TMEM158, CD37	Down-regulated
15	ALLOGRAFT_REJECTION_up	0.000145285	0.000461863	-0.468163	-2.10909	0	193	INHBA, FLNA, TIMP1, CCL2, THY1, IGSF6, TLR6, HLA-DRA, HLA-DMB, MMP9, BCAT1, PTPRC, F2R, FCGR2B, CSF1, SPI1, LCP2, RPL3L, CD74, WAS, HLA-DQA1, CCR5, CD247, SRGN, DYRK3, CD40, IL16, F2, ICAM1, HCLS1, MAP4K1, CD86, ACVR2A, IL2RA, ETS1, IFNGR1, STAB1, CD28, CFP, TRAT1, IRF4, IFNAR2, HLA-DMA, MAP3K7, KLRD1, LY86, TGFB1, SOCS5, CRTAM, ST8SIA4, APBB1, HIF1A, HLA-DOA, ACHE, HLA-E, CD8A, CD96, PTPN6, CD3G…	Down-regulated
16	HYPOXIA_up	0.000145285	0.000461863	-0.477569	-2.15147	0	193	LOX, BGN, TGFB3, NR3C1, AKAP12, COL5A1, IGFBP3, DUSP1, SERPINE1, DCN, ACKR3, SLC2A3, CXCR4, TMEM45A, MAFF, IDS, CSRP2, CHST3, LXN, PPP1R3C, CAV1, MYH9, TNFAIP3, WSB1, MT2A, PAM, KLF7, PIM1, PNRC1, KLHL24, JUN, RRAGD, CITED2, SLC2A5, ETS1, TPBG, NFIL3, RORA, VHL, NDST2, TGM2, PHKG1, ZFP36, SRPX, BNIP3L, PLIN2, INHA, FOSL2, PFKFB3, CHST2, HAS1, ATF3, BHLHE40, SDC3, TES, PGAM2, GAA, S100A4, SDC2, KI…	Down-regulated
17	IL2_STAT5_SIGNALING_up	0.000144823	0.000461863	-0.481597	-2.17414	0	195	IL10RA, COL6A1, GLIPR2, NRP1, PHTF2, GADD45B, DENND5A, SLC2A3, SPP1, MAFF, CYFIP1, CSF1, NCS1, CD83, ADAM19, EMP1, SWAP70, RHOH, PIM1, PRNP, PLPP1, GABARAPL1, ITGAV, ALCAM, RRAGD, RHOB, CKAP4, CD86, CTSZ, BMPR2, GPR83, HOPX, CD48, IL2RA, MAP3K8, LRRC8C, CDC42SE2, FGL2, IFNGR1, NFIL3, RORA, CCR4, MAP6, AHNAK, MYO1E, GALM, PRKCH, CD81, PTH1R, TLR7, LRIG1, IRF4, TGM2, SOCS2, ITIH5, PLIN2, DHRS3, RAB…	Down-regulated
18	INTERFERON_GAMMA_RESPONSE_up	0.000144509	0.000461863	-0.487743	-2.20465	0	196	TNFAIP6, IL10RA, C1R, C1S, SSPN, CCL2, CFH, TNFAIP3, LCP2, CD74, SOCS3, BST2, VCAM1, HLA-DQA1, MT2A, CD40, CSF2RB, PIM1, FPR1, HLA-DRB1, EPSTI1, ICAM1, FCGR1A, CD86, ADAR, SAMHD1, TXNIP, LATS2, FGL2, SOD2, SAMD9L, IRF4, IFNAR2, HLA-DMA, CMKLR1, NOD1, VAMP5, ST8SIA4, MYD88, RSAD2, HIF1A, LY6E, NFKBIA, SECTM1, RIPK1, MX2, SLAMF7, PARP14, STAT3, SP110, PTPN6, CASP4, SELP, SERPING1, ISG15, P2RY14, CC…	Down-regulated
19	COMPLEMENT_up	0.000144342	0.000461863	-0.504564	-2.28354	0	198	ZEB1, CLU, C1R, C3, PIK3R5, FN1, C1S, TIMP1, SERPINE1, OLR1, APOC1, DOCK10, S100A9, CFH, MAFF, RASGRP1, CTSB, LRP1, ANXA5, CBLB, CSRP1, MMP14, TNFAIP3, LCP2, FCN1, GNG2, WAS, CTSD, FYN, CPQ, FCER1G, DUSP5, EHD1, PLA2G7, PIM1, PLEK, F2, CD59, C1QC, GNAI2, HPCAL4, CD36, CPM, CTSL, RBSN, STX4, KYNU, GRB2, RAF1, SPOCK2, LIPA, LGMN, GATA3, PRCP, APOBEC3F, CDK5R1, CASP4, S100A12, PPP4C, SERPING1, GNB4,…	Down-regulated
20	APICAL_JUNCTION_up	0.000144655	0.000461863	-0.506297	-2.28417	0	194	FBN1, CERCAM, NEXN, VCAN, MYL9, LAYN, MMP2, EVL, SLIT2, NLGN2, CLDN11, FLNC, THY1, PARD6G, MMP9, AKT3, ARHGEF6, PTPRC, PECAM1, PARVA, MYH9, SIRPA, MDK, VCL, ACTB, VCAM1, JAM3, ACTG2, INPPL1, TRO, CD99, SKAP2, ICAM1, ZYX, SHC1, GNAI2, CD86, CDH11, MYH10, HRAS, STX4, CALB2, ACTN1, ADAM23, CD34, CD209, LAMB3, VAV2, COL16A1, TIAL1, CDH6, PBX2, PCDH1, FSCN1, AMIGO2, VASP, SDC3, ALOX15B, MPZL1, RSU1, A…	Down-regulated
21	APOPTOSIS_up	0.000148456	0.000461863	-0.527269	-2.31558	0	158	DPYD, BGN, LUM, ANXA1, CLU, TIMP1, DCN, MMP2, TIMP3, GADD45B, PLPPR4, EGR3, GSN, F2R, CAV1, AVPR1A, LEF1, PEA15, EMP1, SMAD7, CYLD, BCL2L11, F2, DAP, SQSTM1, HGF, MGMT, JUN, BTG2, RHOB, TGFBR3, PPT1, CREBBP, LMNA, TXNIP, IFNGR1, SOD2, RARA, MCL1, NEDD9, HSPB1, IGFBP6, FEZ1, BNIP3L, GADD45A, GPX3, RELA, RHOT2, PSEN2, GPX1, ATF3, GNA15, MADD, CD14, CASP4, PDGFRB, PPP2R5B, SATB1, CFLAR	Down-regulated
22	ANGIOGENESIS_up	0.000169664	0.000461863	-0.689186	-2.32632	0	36	FGFR1, LUM, POSTN, VCAN, TIMP1, NRP1, OLR1, COL3A1, FSTL1, SPP1, COL5A2, JAG1, ITGAV, LPL, VAV2	Down-regulated
23	INFLAMMATORY_RESPONSE_up	0.000144404	0.000461863	-0.515623	-2.33437	0	199	TNFAIP6, INHBA, PCDH7, IL10RA, C5AR1, PIK3R5, TIMP1, SERPINE1, C3AR1, OLR1, GPR183, MSR1, CCL2, RASGRP1, ITGA5, DCBLD2, MMP14, RGS1, GABBR1, CSF1, LCP2, BST2, EMP3, PDPN, BDKRB1, OSMR, CD40, FPR1, AQP9, IL1R1, BTG2, ICAM1, CYBB, ACVR2A, CD48, CCL17, CD70, KCNA3, TPBG, STAB1, LAMP3, GPR132, PTGER4, MEFV, ABCA1, RAF1, AXL, CMKLR1, ADGRE1, SGMS2, P2RX7, LPAR1, RELA, HIF1A, LY6E, NFKBIA, CHST2, SELE,…	Down-regulated
24	UV_RESPONSE_dn	0.000151194	0.000461863	-0.558067	-2.40018	0	139	COL1A2, ATP2B4, NR3C1, COL1A1, NRP1, EFEMP1, DUSP1, FBLN5, COL11A1, SERPINE1, IGFBP5, COL3A1, PIAS3, SNAI2, DLC1, RGS4, AKT3, PTPRM, PLPP3, COL5A2, CAV1, RUNX1, PMP22, ADGRL2, FYN, NEK7, SMAD7, GJA1, LTBP1, MGMT, CDON, RXRA, CITED2, DBP, ATXN1, TGFBR3, ACVR2A, NOTCH2, CELF2, ATRN, PDLIM5, SYNE1, ZMIZ1, VAV2, LAMC1, CAP2, DAB2, TGFBR2, PRDM2, KALRN, LPAR1, BHLHE40, ARHGEF9, IGF1R, PDGFRB, RBPMS	Down-regulated
25	MYOGENESIS_up	0.0001443	0.000461863	-0.561083	-2.53805	0	197	TAGLN, COL6A3, SPARC, CLU, APOD, COL1A1, ADAM12, AEBP1, LAMA2, MYLK, IGFBP3, SSPN, PDLIM7, WWTR1, COL3A1, CRYAB, GADD45B, COL6A2, IGFBP7, MYL4, TPM2, CNN3, MRAS, GSN, CASQ2, PPP1R3C, MYH9, PTGIS, MEF2D, PKIA, MYH11, ACSL1, ITGB5, PRNP, GNAO1, IGF1, SVIL, ANKRD2, CD36, COX7A1, NAV2, TNNI2, DMPK, COL15A1, CSRP3, EFS, FKBP1B, PTP4A3, TGFB1, GPX3, PSEN2, ACHE, MYOG, BHLHE40, FLII, GJA5, AK1, FXYD1, G…	Down-regulated
26	COAGULATION_up	0.000150921	0.000461863	-0.599851	-2.5784	0	138	FBN1, CTSK, SPARC, ANXA1, HTRA1, CLU, THBS1, C1R, C3, FN1, C1S, TIMP1, SERPINE1, A2M, MMP2, OLR1, TIMP3, COMP, APOC1, CFH, MAFF, CTSB, LRP1, MMP9, ARF4, CFI, CSRP1, GSN, PECAM1, MMP14, FYN, CPQ, DUSP14, KLF7, PLEK, F2	Down-regulated
27	TNFA_SIGNALING_VIA_NFKB_up	0.000144342	0.000461863	-0.598886	-2.71042	0	198	TNFAIP6, INHBA, GFPT2, EGR2, KLF9, GEM, NR4A3, DUSP1, SERPINE1, OLR1, GPR183, CCL2, GADD45B, ACKR3, DENND5A, SLC2A3, MAFF, SGK1, EGR3, PLPP3, DNAJB4, TNFAIP8, EGR1, CSF1, CD83, TNFAIP3, FOSB, NFKB2, JAG1, SOCS3, RCAN1, LITAF, DUSP5, EHD1, SIK1, BCL6, PNRC1, PLEK, SQSTM1, MSC, JUN, IL6ST, BTG2, ICAM1, TNC, RHOB, MAP3K8, PANX1, NR4A1, PDLIM5, SOD2, NFIL3, KYNU, MCL1, LAMB3, PTGER4, ABCA1, PMEPA1, K…	Down-regulated
28	EPITHELIAL_MESENCHYMAL_TRANSITION_up	0.0001443	0.000461863	-0.785386	-3.55268	0	197	LOX, SPOCK1, FAP, ACTA2, TAGLN, SLIT3, CTHRC1, FBN1, BGN, COL6A3, LGALS1, THBS2, COL1A2, LOXL1, LUM, SPARC, INHBA, SFRP4, BASP1, MFAP5, POSTN, HTRA1, THBS1, PRRX1, COL1A1, ADAM12, MXRA5, VCAN, FLNA, CALD1, FN1, LAMA2, COL5A1, TIMP1, FERMT2, MYLK, GEM, MYL9, IGFBP3, MGP, FBLN5, COL11A1, NID2, COL12A1, SERPINE1, DPYSL3, DCN, MMP2, TIMP3, COMP, COL3A1, GREM1, SLIT2, GADD45B, VIM, SNAI2, CDH2, VEGFC,…	Down-regulated

## Sheet: H.DE.TB
	pathway	pval	padj	ES	NES	nMoreExtreme	size	leadingEdge	Enrichment
1	MYC_TARGETS_V1_up	0.000108672	0.000579415	0.764788	3.16511	0	194	RANBP1, RSL1D1, TFDP1, CCT5, PRDX3, CCT4, BUB3, SNRPG, PCNA, VBP1, DHX15, RAD23B, XPO1, RRM1, SSB, PA2G4, SET, HSPE1, ACP1, UBE2L3, SLC25A3, STARD7, CCNA2, PPIA, EIF3J, RPL18, FBL, KPNA2, EIF4A1, RAN, COX5A, NPM1, SYNCRIP, DEK, PSMB2, ERH, USP1, CBX3, NOLC1, C1QBP, TCP1, NOP16, TXNL4A, HDAC2, PSMA2, NDUFAB1, GOT2, HNRNPC, NOP56, RPS5, EIF1AX, SRSF7, CANX, HPRT1, RPL14, RPL22, SSBP1, SRSF2, FAM120…	Up-regulated
2	E2F_TARGETS_up	0.000108672	0.000579415	0.709226	2.93516	0	194	RANBP1, MELK, PRPS1, SLBP, DLGAP5, CKS2, MKI67, PLK1, PLK4, EXOSC8, SMC3, STMN1, E2F8, HMGB2, PCNA, MTHFD2, XPO1, TOP2A, CDK1, CDC25B, CKS1B, PA2G4, RAD51AP1, DIAPH3, MCM3, PTTG1, KPNA2, CDKN3, DEPDC1, RAN, HELLS, TRIP13, SYNCRIP, DEK, PRIM2, USP1, RPA3, NOLC1, KIF2C, RPA2, BRCA2, CHEK1, CDCA8, PSIP1, EZH2, TACC3, NUP153, NOP56, MSH2, UBE2T, PAICS, MMS22L, RRM2, TMPO, SRSF2, TIPIN, NBN, CCNB2, AU…	Up-regulated
3	G2M_CHECKPOINT_up	0.000109218	0.000579415	0.706057	2.91471	0	189	TTK, FBXO5, TFDP1, CKS2, MKI67, KIF11, PLK1, DR1, PLK4, CENPF, CCNT1, AMD1, BUB3, STMN1, KIF20B, RAD23B, KIF15, XPO1, TOP2A, CDK1, CDC6, CDC25B, CKS1B, EXO1, ORC5, MCM3, KIF23, SMC2, CCNA2, PTTG1, UCK2, RBL1, BUB1, MNAT1, KPNA2, CDKN3, E2F3, SRSF10, NUSAP1, NCL, SYNCRIP, PRC1, TPX2, PRIM2, NOLC1, KIF2C, RPA2, SLC38A1, BRCA2, CHEK1, PBK, EZH2, TACC3, EWSR1, SLC7A1, DBF4, SLC7A5, DKC1, CDC27, HSPA8…	Up-regulated
4	OXIDATIVE_PHOSPHORYLATION_up	0.000109842	0.000579415	0.660129	2.71577	0	183	SDHB, PRDX3, COX10, FH, NDUFB6, SLC25A3, MRPS30, NDUFV2, COX6C, CS, COX5A, ATP6V1C1, NDUFA9, NDUFA4, COX7A2, UQCRH, IMMT, UQCR10, NDUFAB1, MRPL11, UQCRFS1, GOT2, HSPA9, NDUFS2, TIMM9, VDAC2, NDUFA6, LDHA, IDH1, PDHX, NDUFB4, IDH3A, VDAC1, GRPEL1, COX7C, MRPS15, CYC1, NDUFA5, UQCRB, PMPCA, SDHC, MRPS22, POLR2F, NDUFB5, TIMM50, COX8A, CYCS, OAT, FXN, DLAT, COX6A1, LDHB, LRPPRC, COX7A2L, COX11, ACAD…	Up-regulated
5	MTORC1_SIGNALING_up	0.000108696	0.000579415	0.591051	2.44622	0	195	PLK1, GOT1, ELOVL6, EEF1E1, MTHFD2, TCEA1, HSPE1, TMEM97, PPIA, GAPDH, BUB1, RPN1, CACYBP, DHFR, PNP, HSPA5, STIP1, ARPC5L, UCHL5, IMMT, SSR1, UBE2D3, POLR3G, PPA1, GTF2H1, HSPA9, CCT6A, SC5D, SLC7A5, PRDX1, SORD, CANX, HPRT1, ME1, RRM2, PITPNB, PSMD14, LDHA, IDH1, CYP51A1, PSMA4, TPI1, MTHFD2L, EIF2S2, QDPR, PSMC2, SEC11A, SLC7A11, ENO1, AURKA, PGK1, PSMC4, GSR, HSPA4, TRIB3, DDIT4, PIK3R3, HSPD…	Up-regulated
6	UNFOLDED_PROTEIN_RESPONSE_up	0.000117772	0.000579415	0.607135	2.35667	0	108	MTHFD2, CKS1B, HYOU1, EIF4A1, NPM1, YWHAZ, HSPA5, SPCS3, PDIA6, NOLC1, SSR1, HSPA9, NOP56, SLC7A5, DKC1, CNOT6, SRPRB, IMP3, EIF4EBP1, KDELR3, SEC11A, DNAJC3, ATF4, BANF1, DDIT4, PARN, CEBPG, EXOSC9, PSAT1, DDX10, CALR, STC2, EIF4A2, BAG3, DCP2, HSP90B1, EXOSC10, SPCS1, FUS, PAIP1, RPS14, EIF4G1, EIF2S1, SDAD1, XPOT, POP4, SLC30A5, EEF2, ASNS, KIF5B, NABP1, GEMIN4, EDEM1, SEC31A, VEGFA, HERPUD1, …	Up-regulated
7	MYC_TARGETS_V2_up	0.000130073	0.000579415	0.619523	2.18464	0	57	PLK1, PLK4, PA2G4, NDUFAF4, HSPE1, TMEM97, NPM1, CBX3, NOLC1, NOP16, NOP56, SORD, WDR43, TFB2M, DDX18, HSPD1, SUPV3L1, CDK4, UNG, AIMP2, GNL3, PHB, RABEPK, MYC, WDR74, RCL1, UTP20, SRM, SLC29A2	Up-regulated
8	PROTEIN_SECRETION_up	0.000120077	0.000579415	0.55598	2.12174	0	95	DNM1L, TMED2, SNX2, TPD52, SCAMP3, CLTC, TOM1L1, AP3S1, ATP1A1, RAB5A, VPS4B, ARFGEF1, NAPG, KRT18, TMX1, ARF1, RAB14, SCAMP1, SCRN1, COPB1, ADAM10, CLTA, MAPK1, RAB2A, BET1, CTSC, AP2S1, USO1, SOD1, GOLGA4, LMAN1, TSG101, KIF1B, STX7, RER1, AP2M1, STAM, CD63, GNAS, AP2B1, SEC31A, ARCN1, TMED10, CLCN3	Up-regulated
9	MITOTIC_SPINDLE_up	0.000108436	0.000579415	0.50851	2.10718	0	197	TTK, FBXO5, DLGAP5, KIF11, PLK1, CENPF, SMC3, ANLN, KIF20B, KIF15, TOP2A, CDK1, SASS6, KIF23, BUB1, ARF6, NUSAP1, DYNLL2, PRC1, RAPGEF5, TPX2, KIF2C, BRCA2, CEP57, CDC27, CCNB2, ARHGAP5, UXT, SPTBN1, KNTC1, RFC1, WASL, ARFGEF1, AURKA, CD2AP, LRPPRC, ROCK1, RALBP1, YWHAE, EPB41, SMC4, EZR, TUBA4A, RASA1, CDC42, RAPGEF6, KIF4A, KIF22, ATG4B, TSC1, NET1, CSNK1D, TAOK2, LATS1, KIF1B, ARHGEF2, PCGF5, …	Up-regulated
10	GLYCOLYSIS_up	0.000108389	0.000579415	0.499231	2.06951	0	198	PRPS1, GOT1, STMN1, PGAM1, CDK1, KIF2A, PPIA, MED24, DEPDC1, TXN, GFPT1, HSPA5, GOT2, ME2, ME1, LDHA, IDH1, HS6ST2, PKM, TALDO1, DSC2, TPI1, SLC35A3, SDHC, SAP30, KDELR3, ENO1, AURKA, CLN6, MXI1, PGK1, PSMC4, AGL, DDIT4, GALK2, GNPDA1, MET, B3GALT6, P4HA2, NT5E, STC2, EGLN3, PAXIP1, B3GNT3, SOD1, GYS1, STC1, FBP2, AKR1A1, NSDHL, TPBG, ECD, MDH1, EXT2, PPP2CB, B4GALT1, GCLC, CYB5A, HAX1, P4HA1, SO…	Up-regulated
11	REACTIVE_OXYGEN_SPECIES_PATHWAY_up	0.00132943	0.00361901	0.525137	1.79363	9	47	TXN, NDUFS2, PRDX1, OXSR1, NDUFA6, NDUFB4, PRDX6, GSR, GLRX2, SRXN1, ERCC2, LAMTOR5, SOD1, MGST1, GPX4, GCLC, STK25, PFKP	Up-regulated
12	FATTY_ACID_METABOLISM_up	0.000111894	0.000579415	0.433216	1.75488	0	156	HSP90AA1, FH, CCDC58, HSD17B11, YWHAH, ME1, NBN, LDHA, IDH1, HIBCH, AADAT, PRDX6, SDHC, PSME1, PCBD1, ACAT2, HSPH1, KMT5A, UGDH, ODC1, ACAA2, VNN1, PPARA, OSTC, FASN, PTS, DLST, HSD17B7, ECI2, ACADM, NSDHL, METAP1, HMGCL, MDH1, GRHPR, DECR1, DHCR24, CA4, UROS, SUCLA2, UBE2L6, CBR1, MLYCD, ENO3, MIF, HSDL2, APEX1, GAPDHS, HCCS, ALDH3A2, CPOX, ACO2, PDHA1, HSD17B10, PTPRG, MGLL, RAP1GDS1, CRYZ, RDH…	Up-regulated
14	PI3K_AKT_MTOR_SIGNALING_up	0.000355703	0.00134073	0.438721	1.69388	2	103	CDK1, PFN1, CAB39, CFL1, MAPK9, MAPK8, UBE2D3, CLTC, PRKAG1, ARF1, TRIB3, PIK3R3, CDK4, GSK3B, ACACA, MAPK1, CALR, RAC1, HSP90B1, ATF1, ARPC3, MAP3K7, ACTR2, UBE2N, PTEN, DAPP1, E2F1, YWHAB, RPS6KA1, TNFRSF1A, AP2M1, CDK2, PAK4, SMAD2, PITX2	Up-regulated
15	INTERFERON_ALPHA_RESPONSE_up	0.0015595	0.00402187	0.434413	1.65622	12	94	TDRD7, PNPT1, GBP4, B2M, LY6E, CD47, PSME1, DDX60, TAP1, LAP3, TRIM25, PSME2, TRIM21, RIPK2, IFITM3, NUB1, CMPK2, PSMB9, LGALS3BP, USP18, TRAFD1, IRF1, EIF2AK2, NMI, CASP1, UBE2L6, GBP2, PLSCR1, HERC6, IFITM2, PARP12, CXCL10, IL15, CNP, NCOA7, IFITM1, CD74, SLC25A28, TRIM14, ELF1, IRF2, TMEM140, IFIH1, RNF31, ISG15, IL7, IRF9, CXCL11	Up-regulated
16	UV_RESPONSE_up	0.000783261	0.00262805	0.401882	1.62737	6	155	AMD1, DNAJB1, RPN1, POLR2H, EIF5, ATP6V1C1, PPAT, CHRNA5, TMBIM6, STIP1, E2F5, DNAJA1, BSG, DDX21, KCNH2, GRPEL1, NUP58, STARD3, RFC4, CEBPG, FEN1, EPCAM, TFRC, PARP2, CASP3, TUBA4A, TAP1, AGO2, EIF2S3, AP2S1, CYB5R1, GAL, SPR, CCNE1, ALAS1, IRF1, BTG3, LHX2, SLC25A4, MARK2, STK25, ASNS, POLG2, DGAT1, HNRNPU, GRINA, CDK2, FURIN, GLS, LYN	Up-regulated
17	ANDROGEN_RESPONSE_up	0.00191479	0.00469124	0.416099	1.59386	15	97	CENPN, PA2G4, TMEM50A, SRP19, VAPA, SPCS3, MAP7, SORD, UBE2I, TPD52, B2M, GSR, UBE2J1, XRCC6, SAT1, NGLY1, SPDEF, SLC38A2, UAP1, STK39, LMAN1, PIAS1, B4GALT1, DHCR24, GNAI3, XRCC5, RAB4A, ABCC4, DBI, ACSL3, AZGP1, CCND1, HMGCR, PGM3, TNFAIP8, SCD, MYL12A, ELL2, ADRM1, DNAJB9, NDRG1, HPGD, ELK4, HERC3, RPS6KA3, FKBP5	Up-regulated
22	KRAS_SIGNALING_dn	0.00249377	0.0055543	-0.267045	-1.40704	1	195	RSAD2, P2RX6, EFHD1, BMPR1B, COPZ2, RGS11, SYNPO, SHOX2, KCNMB1, TEX15, COL2A1, SSTR4, SGK1, CLDN16, IL12B, IDUA, AMBN, ATP4A, PROP1, NPHS1, CHST2, PCDHB1, ACTC1, CAMK1D, NTF3, PDCD1, BTG2, MSH5, PKP1, THNSL2, ARHGDIG, ABCB11, CALML5, WNT16, MAST3, SNCB, ATP6V1B1, IFI44L, MEFV, OXT, TFCP2L1, CDH16, EGF, SLC5A5, CAPN9, NGB, ITGB1BP2, CCNA1, KCNE2, CPA2, TNNI3, SKIL, GDNF, PTPRJ, DCC, EDN1, NOS1, G…	Down-regulated
23	HEDGEHOG_SIGNALING_up	0.00978615	0.0199801	-0.426867	-1.64091	26	36	UNC5C, CRMP1, ETS2, THY1, AMOT, ACHE, NKX6-1, NRP2, MYH9, CDK6, NRP1, LDB1, GLI1, OPHN1	Down-regulated
24	COAGULATION_up	0.000804505	0.00262805	-0.344489	-1.73099	0	138	CTSK, MMP2, FBN1, C1R, LRP1, MAFF, C3, SPARC, HTRA1, KLF7, TIMP3, COMP, SH2B2, C2, THBS1, RGN, CFI, F9, OLR1, MMP9, FN1, ITIH1, F13B, ACOX2, USP11, SERPING1, C1S, CPQ, F2, MST1, C8G, SERPINE1, MMP7, A2M, ANXA1, CD9, CSRP1, TFPI2	Down-regulated
25	MYOGENESIS_up	0.00128205	0.00361901	-0.340629	-1.79355	0	197	COL1A1, COL6A3, AEBP1, SPARC, LAMA2, GADD45B, ADAM12, PPP1R3C, MYL3, COL6A2, DMD, PVALB, ITGB5, SSPN, IGFBP7, MEF2C, EFS, LSP1, ACHE, MYH3, TPM2, FKBP1B, MRAS, CSRP3, CNN3, CRAT, COL3A1, MYL4, SGCA, PSEN2, TAGLN, PDLIM7, APOD, TCAP, TNNC2, CD36, ANKRD2, ACTC1, SPTAN1, TSC2, SH2B1, SMTN, MEF2D, MYH9, COL15A1, IGF1, SH3BGR, PTP4A3, ATP2A1, GAA, CRYAB, PTGIS, TNNT3, CHRNB1, MYLK, EPHB3, SOD3, MYOM1,…	Down-regulated
26	EPITHELIAL_MESENCHYMAL_TRANSITION_up	0.00128205	0.00361901	-0.598008	-3.14875	0	197	MMP2, COL12A1, LUM, SPOCK1, COL1A1, SLIT3, FBN1, DCN, LRP1, COL6A3, LOXL1, SFRP4, MFAP5, SPARC, LAMA2, GADD45B, HTRA1, ADAM12, DAB2, PRRX1, RGS4, INHBA, COL1A2, VIM, COL6A2, CRLF1, GREM1, COL5A1, ECM2, GEM, NTM, BGN, SFRP1, SLIT2, TIMP3, GJA1, BASP1, VCAN, MXRA5, COMP, LOX, FSTL1, RHOB, GLIPR1, THY1, ITGB5, VCAM1, FBLN5, ACTA2, THBS1, CDH2, FAP, TNC, LAMC1, MGP, PCOLCE, NID2, THBS2, MYL9, LGALS1,…	Down-regulated

[truncated: 141 more sheets: H.MU.PP, H.MU.SE, H.MU.TB, H.PP.SE, H.PP.TB, H.SE.TB, C1.CT.DE, C1.CT.MU, C1.CT.PP, C1.CT.SE, C1.CT.TB, C1.DE.MU, C1.DE.PP, C1.DE.SE, C1.DE.TB, C1.MU.PP, C1.MU.SE, C1.MU.TB, C1.PP.SE, C1.PP.TB …]
