# Supplementary material for: Molecular portraits of colorectal cancer morphological regions
Source: eLife. 2023 Nov 13;12:RP86655. doi: 10.7554/eLife.86655 (PMC10642970; doi:10.7554/eLife.86655)
Supplement: Supplementary file 13. [file elife-86655-supp13.xlsx]

## Sheet: SF13
Gene signature ID	Reference
Eschrich	Steven Eschrich, Ivana Yang, Greg Bloom, et al. Molecular Staging for Survival Prediction of Colorectal Cancer Patients. Journal of Clinical Oncology 2005 23:15, 3526-3535
Jorissen	Jorissen RN, Gibbs P, Christie M, et al. Metastasis-Associated Gene Expression Changes Predict Poor Outcomes in Patients with Dukes Stage B and C Colorectal Cancer. Clin Cancer Res. 2009 Dec 15;15(24):7642-7651. doi: 10.1158/1078-0432.CCR-09-1431. PMID: 19996206; PMCID: PMC2920750.
Kennedy	Kennedy RD, Bylesjo M, Kerr P, et al. Development and independent validation of a prognostic assay for stage II colon cancer using formalin-fixed paraffin-embedded tissue. J Clin Oncol. 2011 Dec 10;29(35):4620-6. doi: 10.1200/JCO.2011.35.4498. Epub 2011 Nov 7. PMID: 22067406.
Kim	Kim, SK., Kim, SY., Kim, C.W. et al. A prognostic index based on an eleven gene signature to predict systemic recurrences in colorectal cancer. Exp Mol Med 51, 1–12 (2019). https://doi.org/10.1038/s12276-019-0319-y
Ma	Ma Xiao-Bo, Xu Yuan-Yuan, Zhu Meng-Xuan, Wang Lu. Prognostic Signatures Based on Thirteen Immune-Related Genes in Colorectal Cancer. Frontiers in Oncology, 10, 2021, doi: 10.3389/fonc.2020.591739
Yuan-rs4	Yuan, Yihang et al. Development and Clinical Validation of a Novel 4-Gene Prognostic Signature Predicting Survival in Colorectal Cancer. Frontiers in Oncology. 10, 2020, doi: 10.3389/fonc.2020.00595
Zhou-tmrs	Zhou R, et al. A robust panel based on tumour microenvironment genes for prognostic prediction and tailoring therapies in stage I-III colon cancer. EBioMedicine. 2019 Apr;42:420-430. doi: 10.1016/j.ebiom.2019.03.043. Epub 2019 Mar 24. PMID: 30917936; PMCID: PMC6491960.
Shu-prgpi	Shu P, Wu J, Tong Y, Xu C, Zhang X. Gene pair based prognostic signature for colorectal colon cancer. Medicine (Baltimore). 2018 Oct;97(42):e12788. doi: 10.1097/MD.0000000000012788. PMID: 30334969; PMCID: PMC6211904.
Fang-rs12	Fang Z, Xu S, Xie Y, Yan W. Identification of a prognostic gene signature of colon cancer using integrated bioinformatics analysis. World J Surg Oncol. 2021 Jan 13;19(1):13. doi: 10.1186/s12957-020-02116-y. PMID: 33441161; PMCID: PMC7807455.
Zuo-rs6	Zuo S, Dai G, Ren X. Identification of a 6-gene signature predicting prognosis for colorectal cancer. Cancer Cell Int. 2019 Jan 5;19:6. doi: 10.1186/s12935-018-0724-7. PMID: 30627052; PMCID: PMC6321660.
